# Supplementary material for: Pan-Cancer Analysis Reveals the Prognostic Potential of the THAP9/THAP9-AS1 Sense–Antisense Gene Pair in Human Cancers
Source: Noncoding RNA. 2022 Jul 8;8(4):51. doi: 10.3390/ncrna8040051 (PMC9326536; doi:10.3390/ncrna8040051)
Supplement: Supplementary file 1 [file ncrna-08-00051-s001.zip]

Archive with 13 entries (13 files):
- Supplementary Figure S1.pdf
- Supplementary Figure S2.pdf
- Supplementary Figure S3.pdf
- Supplementary Figure S4.pdf
- Supplementary Figure S5.pdf
- Supplementary Figure S6.pdf
- Supplementary Table S10_1.xlsx
- Supplementary Table S10_2.xlsx
- Supplementary Table S11_1.xlsx
- Supplementary Table S11_2.xlsx
- Supplementary Table S8.xlsx
- Supplementary Table S9.xlsx
- Supplementary_Tables S1-S7.xlsx
