# Supplementary material for: Pan-Cancer Analysis Reveals the Prognostic Potential of the THAP9/THAP9-AS1 Sense–Antisense Gene Pair in Human Cancers
Source: Noncoding RNA. 2022 Jul 8;8(4):51. doi: 10.3390/ncrna8040051 (PMC9326536; doi:10.3390/ncrna8040051)
Supplement: Supplementary file 1 [file ncrna-08-00051-s001.zip › Supplementary Table S8.xlsx]

## Sheet: BLCA_normal
gene1	gene2	correlation	module1	module2
THAP9	ABHD8	0.044955	darkturquoise	darkturquoise
THAP9	ACVR2B	0.08398	darkturquoise	darkturquoise
THAP9	ADAM20P1	0.029443	darkturquoise	darkturquoise
THAP9	AGPAT1	0.156099	darkturquoise	darkturquoise
THAP9	ALDH6A1	0.100546	darkturquoise	darkturquoise
THAP9	ALKBH8	0.098699	darkturquoise	darkturquoise
THAP9	ALX1	0.049113	darkturquoise	darkturquoise
THAP9	AMIGO1	0.048768	darkturquoise	darkturquoise
THAP9	ARL14EP	0.125427	darkturquoise	darkturquoise
THAP9	ARL5AP3	0.010877	darkturquoise	darkturquoise
THAP9	ARL6IP5	0.14882	darkturquoise	darkturquoise
THAP9	ARRB1	0.099414	darkturquoise	darkturquoise
THAP9	ART1	0.04897	darkturquoise	darkturquoise
THAP9	ASB7	0.103073	darkturquoise	darkturquoise
THAP9	ATG14	0.098943	darkturquoise	darkturquoise
THAP9	ATP23	0.06875	darkturquoise	darkturquoise
THAP9	ATP6V1G1P2	0.056802	darkturquoise	darkturquoise
THAP9	AXIN2	0.065829	darkturquoise	darkturquoise
THAP9	B3GALT2	0.016961	darkturquoise	darkturquoise
THAP9	BBS10	0.116474	darkturquoise	darkturquoise
THAP9	BBS12	0.062207	darkturquoise	darkturquoise
THAP9	BCL9	0.144527	darkturquoise	darkturquoise
THAP9	BEAN1.AS1	0.003395	darkturquoise	NA
THAP9	BRD8	0.178868	darkturquoise	darkturquoise
THAP9	C15orf65	0.029324	darkturquoise	darkturquoise
THAP9	C17orf80	0.105937	darkturquoise	darkturquoise
THAP9	C19orf44	0.117876	darkturquoise	darkturquoise
THAP9	CCDC112	0.101205	darkturquoise	darkturquoise
THAP9	CCDC113	0.069382	darkturquoise	darkturquoise
THAP9	CCDC121	0.0879	darkturquoise	darkturquoise
THAP9	CCDC127	0.043279	darkturquoise	darkturquoise
THAP9	CCDC30	0.123631	darkturquoise	darkturquoise
THAP9	CCDC66	0.11502	darkturquoise	darkturquoise
THAP9	CEP19	0.030146	darkturquoise	darkturquoise
THAP9	CHST5	0.037308	darkturquoise	darkturquoise
THAP9	CLCN4	0.026169	darkturquoise	darkturquoise
THAP9	CNPPD1	0.065296	darkturquoise	darkturquoise
THAP9	COA5	0.135493	darkturquoise	darkturquoise
THAP9	CPLANE2	0.110113	darkturquoise	darkturquoise
THAP9	CYB561D1	0.028362	darkturquoise	darkturquoise
THAP9	CYP2T1P	0.034104	darkturquoise	darkturquoise
THAP9	CYP3A43	0.028214	darkturquoise	darkturquoise
THAP9	DBF4B	0.091813	darkturquoise	darkturquoise
THAP9	DCP1B	0.049511	darkturquoise	darkturquoise
THAP9	DHFR2	0.114544	darkturquoise	darkturquoise
THAP9	DHX35	0.122225	darkturquoise	darkturquoise
THAP9	DNAJC3.DT	0.056087	darkturquoise	NA
THAP9	DPF2	0.066657	darkturquoise	darkturquoise
THAP9	EEF1AKMT3	0.145363	darkturquoise	darkturquoise
THAP9	EFCAB7	0.156079	darkturquoise	darkturquoise
THAP9	ENPP5	0.035995	darkturquoise	darkturquoise
THAP9	ENPP7P8	0.006185	darkturquoise	darkturquoise
THAP9	EPS8	0.098025	darkturquoise	darkturquoise
THAP9	ESRRG	0.101823	darkturquoise	darkturquoise
THAP9	ETFBKMT	0.141814	darkturquoise	darkturquoise
THAP9	FAM217B	0.030168	darkturquoise	darkturquoise
THAP9	FAM47E	0.045221	darkturquoise	darkturquoise
THAP9	FBXL2	0.058703	darkturquoise	darkturquoise
THAP9	FBXO42	0.14523	darkturquoise	darkturquoise
THAP9	FBXO8	0.128117	darkturquoise	darkturquoise
THAP9	FOXJ3	0.131759	darkturquoise	darkturquoise
THAP9	FRG1.DT	0.105262	darkturquoise	NA
THAP9	FZD4	0.076549	darkturquoise	darkturquoise
THAP9	FZD4.DT	0.068062	darkturquoise	NA
THAP9	GIN1	0.109403	darkturquoise	darkturquoise
THAP9	GJC3	0.017764	darkturquoise	darkturquoise
THAP9	GNRHR2	0.064123	darkturquoise	darkturquoise
THAP9	GPATCH11	0.07816	darkturquoise	darkturquoise
THAP9	GPR179	0.025862	darkturquoise	darkturquoise
THAP9	GPR27	0.047855	darkturquoise	darkturquoise
THAP9	GSPT2	0.061614	darkturquoise	darkturquoise
THAP9	GUCA1B	0.052163	darkturquoise	darkturquoise
THAP9	GUSBP5	0.081123	darkturquoise	darkturquoise
THAP9	HDAC11.AS1	0.014054	darkturquoise	NA
THAP9	HEATR6	0.103321	darkturquoise	darkturquoise
THAP9	HEXIM2	0.067399	darkturquoise	darkturquoise
THAP9	HID1.AS1	0.024418	darkturquoise	NA
THAP9	HS1BP3.IT1	0.002987	darkturquoise	NA
THAP9	HSPA1L	0.105619	darkturquoise	darkturquoise
THAP9	INMT.MINDY4	0.042893	darkturquoise	NA
THAP9	INPP5B	0.12936	darkturquoise	darkturquoise
THAP9	IP6K3	0.00284	darkturquoise	darkturquoise
THAP9	IRAK1BP1	0.198526	darkturquoise	darkturquoise
THAP9	JADE2	0.095779	darkturquoise	darkturquoise
THAP9	KAT14	0.082516	darkturquoise	darkturquoise
THAP9	KBTBD6	0.070589	darkturquoise	darkturquoise
THAP9	KDM4D	0.068016	darkturquoise	darkturquoise
THAP9	KIAA1143	0.153332	darkturquoise	darkturquoise
THAP9	KIF17	0.000647	darkturquoise	darkturquoise
THAP9	KLHL11	0.089859	darkturquoise	darkturquoise
THAP9	KLHL24	0.118119	darkturquoise	darkturquoise
THAP9	KLHL36	0.089708	darkturquoise	darkturquoise
THAP9	KRBOX4	0.153076	darkturquoise	darkturquoise
THAP9	LINC00888	0.067763	darkturquoise	darkturquoise
THAP9	LINC00909	0.107291	darkturquoise	darkturquoise
THAP9	LINC01011	0.055635	darkturquoise	darkturquoise
THAP9	LINC02724	0.019432	darkturquoise	darkturquoise
THAP9	LIPJ	0.04716	darkturquoise	darkturquoise
THAP9	LMAN2L	0.104816	darkturquoise	darkturquoise
THAP9	LOC100287042	0.034203	darkturquoise	darkturquoise
THAP9	LOC100287896	0.055935	darkturquoise	darkturquoise
THAP9	LOC100505715	0.093265	darkturquoise	darkturquoise
THAP9	LOC100507283	0.110626	darkturquoise	darkturquoise
THAP9	LOC100996419	0.049276	darkturquoise	darkturquoise
THAP9	LOC101926913	0.03662	darkturquoise	darkturquoise
THAP9	LOC101930085	0.117246	darkturquoise	darkturquoise
THAP9	LOC105371592	0.08666	darkturquoise	darkturquoise
THAP9	LOC105377623	0.099417	darkturquoise	darkturquoise
THAP9	LOC107985579	0.038609	darkturquoise	darkturquoise
THAP9	LOC554206	0.009762	darkturquoise	darkturquoise
THAP9	LOC645967	0.054458	darkturquoise	darkturquoise
THAP9	LRRC4B	0.003008	darkturquoise	darkturquoise
THAP9	LRRC66	0.050388	darkturquoise	darkturquoise
THAP9	LZTFL1	0.124567	darkturquoise	darkturquoise
THAP9	LZTR1	0.111291	darkturquoise	darkturquoise
THAP9	MAGEE1	0.043478	darkturquoise	darkturquoise
THAP9	MANEA.DT	0.056351	darkturquoise	NA
THAP9	MAP10	0.096721	darkturquoise	darkturquoise
THAP9	MAVS	0.061526	darkturquoise	darkturquoise
THAP9	MBLAC2	0.078941	darkturquoise	darkturquoise
THAP9	MIR378A	0.006973	darkturquoise	darkturquoise
THAP9	MLEC	0.081404	darkturquoise	darkturquoise
THAP9	MOCS1	0.060533	darkturquoise	darkturquoise
THAP9	MPHOSPH8	0.134796	darkturquoise	darkturquoise
THAP9	MRPL10	0.110185	darkturquoise	darkturquoise
THAP9	MRPS27	0.152816	darkturquoise	darkturquoise
THAP9	MRPS31P5	0.084898	darkturquoise	darkturquoise
THAP9	MSANTD4	0.122065	darkturquoise	darkturquoise
THAP9	NATD1	0.061976	darkturquoise	darkturquoise
THAP9	NF1	0.121583	darkturquoise	darkturquoise
THAP9	NHLRC1	0.038348	darkturquoise	darkturquoise
THAP9	NMUR1	0.038432	darkturquoise	darkturquoise
THAP9	NR2F2	0.08668	darkturquoise	darkturquoise
THAP9	NUDT13	0.074985	darkturquoise	darkturquoise
THAP9	OARD1	0.042278	darkturquoise	darkturquoise
THAP9	OGG1	0.146293	darkturquoise	darkturquoise
THAP9	OR7E2P	0.014647	darkturquoise	darkturquoise
THAP9	ORC5	0.130175	darkturquoise	darkturquoise
THAP9	OSER1.DT	0.036755	darkturquoise	NA
THAP9	PARP16	0.150064	darkturquoise	darkturquoise
THAP9	PAXBP1.AS1	0.13517	darkturquoise	NA
THAP9	PEX12	0.117883	darkturquoise	darkturquoise
THAP9	PGPEP1	0.074708	darkturquoise	darkturquoise
THAP9	PIP4K2B	0.169529	darkturquoise	darkturquoise
THAP9	POFUT1	0.136146	darkturquoise	darkturquoise
THAP9	POLI	0.153216	darkturquoise	darkturquoise
THAP9	POT1	0.12772	darkturquoise	darkturquoise
THAP9	PPP1R3G	0.045978	darkturquoise	darkturquoise
THAP9	PPP2R5D	0.133182	darkturquoise	darkturquoise
THAP9	PRR12	0.127485	darkturquoise	darkturquoise
THAP9	PRRT1	0.09136	darkturquoise	darkturquoise
THAP9	PRSS37	0.038859	darkturquoise	darkturquoise
THAP9	PSKH1	0.10947	darkturquoise	darkturquoise
THAP9	PTOV1.AS1	0.060918	darkturquoise	NA
THAP9	RBM43	0.0592	darkturquoise	darkturquoise
THAP9	RBMXL2	0.022327	darkturquoise	darkturquoise
THAP9	REST	0.120698	darkturquoise	darkturquoise
THAP9	RFC1	0.189396	darkturquoise	darkturquoise
THAP9	RMI1	0.047881	darkturquoise	darkturquoise
THAP9	RN7SL268P	0.054297	darkturquoise	darkturquoise
THAP9	RNA5SP515	0.000698	darkturquoise	darkturquoise
THAP9	RNA5SP78	0.026475	darkturquoise	darkturquoise
THAP9	RNF20	0.131182	darkturquoise	darkturquoise
THAP9	RNF26	0.093453	darkturquoise	darkturquoise
THAP9	RNU6.481P	0.03883	darkturquoise	NA
THAP9	RNU6.584P	0.003491	darkturquoise	NA
THAP9	RNU6.807P	0.00644	darkturquoise	NA
THAP9	RPRD2	0.138824	darkturquoise	darkturquoise
THAP9	RSBN1	0.121027	darkturquoise	darkturquoise
THAP9	SALL2	0.034825	darkturquoise	darkturquoise
THAP9	SAP30L.AS1	0.114875	darkturquoise	NA
THAP9	SARM1	0.098342	darkturquoise	darkturquoise
THAP9	SBF2.AS1	0.091759	darkturquoise	NA
THAP9	SDAD1	0.112054	darkturquoise	darkturquoise
THAP9	SENP8	0.121335	darkturquoise	darkturquoise
THAP9	SETDB2	0.180168	darkturquoise	darkturquoise
THAP9	SIGLEC8	0.088232	darkturquoise	darkturquoise
THAP9	SKIDA1	0.03117	darkturquoise	darkturquoise
THAP9	SLAIN1	0.038141	darkturquoise	darkturquoise
THAP9	SLC25A21.AS1	0.037415	darkturquoise	NA
THAP9	SLC35E2A	0.095702	darkturquoise	darkturquoise
THAP9	SLC46A1	0.073646	darkturquoise	darkturquoise
THAP9	SMCR8	0.084354	darkturquoise	darkturquoise
THAP9	SOX12	0.011511	darkturquoise	darkturquoise
THAP9	STAC	0.004751	darkturquoise	darkturquoise
THAP9	SVOP	0.022304	darkturquoise	darkturquoise
THAP9	TAB1	0.136959	darkturquoise	darkturquoise
THAP9	TAS2R20	0.112884	darkturquoise	darkturquoise
THAP9	TBC1D13	0.077641	darkturquoise	darkturquoise
THAP9	TBC1D14	0.117272	darkturquoise	darkturquoise
THAP9	TBC1D16	0.084793	darkturquoise	darkturquoise
THAP9	TBX5.AS1	0.009202	darkturquoise	NA
THAP9	TCEANC	0.033085	darkturquoise	darkturquoise
THAP9	TCEANC2	0.06732	darkturquoise	darkturquoise
THAP9	TDGF1	0.024393	darkturquoise	darkturquoise
THAP9	TGFBRAP1	0.134473	darkturquoise	darkturquoise
THAP9	THRB	0.0951	darkturquoise	darkturquoise
THAP9	TIRAP	0.144992	darkturquoise	darkturquoise
THAP9	TMC3	0.036542	darkturquoise	darkturquoise
THAP9	TMEM169	0.041058	darkturquoise	darkturquoise
THAP9	TMEM221	0.019961	darkturquoise	darkturquoise
THAP9	TOB1.AS1	0.01599	darkturquoise	NA
THAP9	TRANK1	0.162563	darkturquoise	darkturquoise
THAP9	TRAPPC2	0.135757	darkturquoise	darkturquoise
THAP9	TRAPPC5	0.005976	darkturquoise	darkturquoise
THAP9	TRIM68	0.105237	darkturquoise	darkturquoise
THAP9	TRMT1L	0.140548	darkturquoise	darkturquoise
THAP9	TSC22D1.AS1	0.072728	darkturquoise	NA
THAP9	TSPO2	0.077413	darkturquoise	darkturquoise
THAP9	TSPY26P	0.051721	darkturquoise	darkturquoise
THAP9	TSPYL5	0.092843	darkturquoise	darkturquoise
THAP9	TSSK3	0.063835	darkturquoise	darkturquoise
THAP9	TTC30A	0.043157	darkturquoise	darkturquoise
THAP9	TTC30B	0.058043	darkturquoise	darkturquoise
THAP9	TTLL1.AS1	0.004687	darkturquoise	NA
THAP9	UBXN2B	0.084593	darkturquoise	darkturquoise
THAP9	UNC119B	0.05676	darkturquoise	darkturquoise
THAP9	USP27X.AS1	0.039789	darkturquoise	NA
THAP9	USP3.AS1	0.090516	darkturquoise	NA
THAP9	USP35	0.085364	darkturquoise	darkturquoise
THAP9	USP51	0.01097	darkturquoise	darkturquoise
THAP9	UTP14C	0.115479	darkturquoise	darkturquoise
THAP9	VN1R67P	0.007982	darkturquoise	darkturquoise
THAP9	VPS26B	0.135884	darkturquoise	darkturquoise
THAP9	WDCP	0.072256	darkturquoise	darkturquoise
THAP9	WDR5B	0.082454	darkturquoise	darkturquoise
THAP9	WDR81	0.135535	darkturquoise	darkturquoise
THAP9	WDR88	0.119269	darkturquoise	darkturquoise
THAP9	WNK2	0.014276	darkturquoise	darkturquoise
THAP9	WWC2.AS2	0.026643	darkturquoise	NA
THAP9	YEATS2	0.126705	darkturquoise	darkturquoise
THAP9	ZBED3.AS1	0.034986	darkturquoise	NA
THAP9	ZBED8	0.043888	darkturquoise	darkturquoise
THAP9	ZBTB12	0.078999	darkturquoise	darkturquoise
THAP9	ZBTB14	0.21725	darkturquoise	darkturquoise
THAP9	ZBTB25	0.132708	darkturquoise	darkturquoise
THAP9	ZBTB3	0.053809	darkturquoise	darkturquoise
THAP9	ZBTB34	0.068274	darkturquoise	darkturquoise
THAP9	ZEB1.AS1	0.109302	darkturquoise	NA
THAP9	ZFHX2	0.093218	darkturquoise	darkturquoise
THAP9	ZFP1	0.097009	darkturquoise	darkturquoise
THAP9	ZFP14	0.147995	darkturquoise	darkturquoise
THAP9	ZFP3	0.101854	darkturquoise	darkturquoise
THAP9	ZFP30	0.122826	darkturquoise	darkturquoise
THAP9	ZFP37	0.113651	darkturquoise	darkturquoise
THAP9	ZFP69	0.05508	darkturquoise	darkturquoise
THAP9	ZFP82	0.07433	darkturquoise	darkturquoise
THAP9	ZFP90	0.168912	darkturquoise	darkturquoise
THAP9	ZFYVE1	0.134073	darkturquoise	darkturquoise
THAP9	ZIK1	0.062006	darkturquoise	darkturquoise
THAP9	ZKSCAN3	0.169621	darkturquoise	darkturquoise
THAP9	ZKSCAN4	0.082405	darkturquoise	darkturquoise
THAP9	ZMYM1	0.125191	darkturquoise	darkturquoise
THAP9	ZNF112	0.138192	darkturquoise	darkturquoise
THAP9	ZNF132	0.081678	darkturquoise	darkturquoise
THAP9	ZNF14	0.054764	darkturquoise	darkturquoise
THAP9	ZNF174	0.030514	darkturquoise	darkturquoise
THAP9	ZNF175	0.080608	darkturquoise	darkturquoise
THAP9	ZNF19	0.094944	darkturquoise	darkturquoise
THAP9	ZNF192P1	0.098431	darkturquoise	darkturquoise
THAP9	ZNF2	0.0701	darkturquoise	darkturquoise
THAP9	ZNF214	0.088703	darkturquoise	darkturquoise
THAP9	ZNF221	0.091312	darkturquoise	darkturquoise
THAP9	ZNF225	0.094761	darkturquoise	darkturquoise
THAP9	ZNF23	0.107183	darkturquoise	darkturquoise
THAP9	ZNF230	0.069617	darkturquoise	darkturquoise
THAP9	ZNF233	0.018614	darkturquoise	darkturquoise
THAP9	ZNF234	0.12418	darkturquoise	darkturquoise
THAP9	ZNF235	0.084318	darkturquoise	darkturquoise
THAP9	ZNF283	0.101249	darkturquoise	darkturquoise
THAP9	ZNF285	0.062283	darkturquoise	darkturquoise
THAP9	ZNF286B	0.067482	darkturquoise	darkturquoise
THAP9	ZNF30	0.103786	darkturquoise	darkturquoise
THAP9	ZNF302	0.116485	darkturquoise	darkturquoise
THAP9	ZNF304	0.107726	darkturquoise	darkturquoise
THAP9	ZNF318	0.148008	darkturquoise	darkturquoise
THAP9	ZNF319	0.075194	darkturquoise	darkturquoise
THAP9	ZNF32.AS1	0.040283	darkturquoise	NA
THAP9	ZNF322	0.109776	darkturquoise	darkturquoise
THAP9	ZNF34	0.068737	darkturquoise	darkturquoise
THAP9	ZNF347	0.160073	darkturquoise	darkturquoise
THAP9	ZNF383	0.097535	darkturquoise	darkturquoise
THAP9	ZNF391	0.101995	darkturquoise	darkturquoise
THAP9	ZNF396	0.064226	darkturquoise	darkturquoise
THAP9	ZNF397	0.111092	darkturquoise	darkturquoise
THAP9	ZNF404	0.123065	darkturquoise	darkturquoise
THAP9	ZNF415	0.143795	darkturquoise	darkturquoise
THAP9	ZNF420	0.17155	darkturquoise	darkturquoise
THAP9	ZNF425	0.051213	darkturquoise	darkturquoise
THAP9	ZNF43	0.069209	darkturquoise	darkturquoise
THAP9	ZNF441	0.069374	darkturquoise	darkturquoise
THAP9	ZNF449	0.082147	darkturquoise	darkturquoise
THAP9	ZNF461	0.122735	darkturquoise	darkturquoise
THAP9	ZNF470	0.092469	darkturquoise	darkturquoise
THAP9	ZNF490	0.114624	darkturquoise	darkturquoise
THAP9	ZNF501	0.056112	darkturquoise	darkturquoise
THAP9	ZNF503	0.023121	darkturquoise	darkturquoise
THAP9	ZNF510	0.095622	darkturquoise	darkturquoise
THAP9	ZNF512	0.146364	darkturquoise	darkturquoise
THAP9	ZNF530	0.021263	darkturquoise	darkturquoise
THAP9	ZNF540	0.058336	darkturquoise	darkturquoise
THAP9	ZNF546	0.073376	darkturquoise	darkturquoise
THAP9	ZNF549	0.06361	darkturquoise	darkturquoise
THAP9	ZNF555	0.099182	darkturquoise	darkturquoise
THAP9	ZNF566	0.189575	darkturquoise	darkturquoise
THAP9	ZNF568	0.135141	darkturquoise	darkturquoise
THAP9	ZNF572	0.077879	darkturquoise	darkturquoise
THAP9	ZNF582.AS1	0.079581	darkturquoise	NA
THAP9	ZNF585B	0.178269	darkturquoise	darkturquoise
THAP9	ZNF594	0.076992	darkturquoise	darkturquoise
THAP9	ZNF596	0.074173	darkturquoise	darkturquoise
THAP9	ZNF607	0.056696	darkturquoise	darkturquoise
THAP9	ZNF610	0.073205	darkturquoise	darkturquoise
THAP9	ZNF615	0.038679	darkturquoise	darkturquoise
THAP9	ZNF616	0.099351	darkturquoise	darkturquoise
THAP9	ZNF619	0.176056	darkturquoise	darkturquoise
THAP9	ZNF623	0.078494	darkturquoise	darkturquoise
THAP9	ZNF624	0.080896	darkturquoise	darkturquoise
THAP9	ZNF627	0.113479	darkturquoise	darkturquoise
THAP9	ZNF671	0.007911	darkturquoise	darkturquoise
THAP9	ZNF684	0.100869	darkturquoise	darkturquoise
THAP9	ZNF691	0.0504	darkturquoise	darkturquoise
THAP9	ZNF70	0.143187	darkturquoise	darkturquoise
THAP9	ZNF709	0.044371	darkturquoise	darkturquoise
THAP9	ZNF736	0.069053	darkturquoise	darkturquoise
THAP9	ZNF74	0.095289	darkturquoise	darkturquoise
THAP9	ZNF740	0.089109	darkturquoise	darkturquoise
THAP9	ZNF772	0.090118	darkturquoise	darkturquoise
THAP9	ZNF778	0.069567	darkturquoise	darkturquoise
THAP9	ZNF791	0.120703	darkturquoise	darkturquoise
THAP9	ZNF792	0.027763	darkturquoise	darkturquoise
THAP9	ZNF799	0.050576	darkturquoise	darkturquoise
THAP9	ZNF835	0.017448	darkturquoise	darkturquoise
THAP9	ZNF844	0.048879	darkturquoise	darkturquoise
THAP9	ZNF879	0.064816	darkturquoise	darkturquoise
THAP9	ZSCAN12	0.094834	darkturquoise	darkturquoise
THAP9	ZSCAN2	0.041121	darkturquoise	darkturquoise
THAP9	ZSCAN20	0.084325	darkturquoise	darkturquoise
THAP9	ZSCAN21	0.124007	darkturquoise	darkturquoise
THAP9	ZSCAN26	0.073976	darkturquoise	darkturquoise
THAP9	ZSCAN32	0.087521	darkturquoise	darkturquoise

## Sheet: BLCA_tumor
gene1	gene2	correlation	module1	module2
THAP9	ACSS1	0.000141	tan	tan
THAP9	ACTG1P24	0.000692	tan	tan
THAP9	ACTG1P25	0.001916	tan	tan
THAP9	ADAM22	0.001922	tan	tan
THAP9	ADAMTS17	9.06e-06	tan	tan
THAP9	AGBL3	0.005639	tan	tan
THAP9	AKAP3	4.89e-05	tan	tan
THAP9	AMIGO1	0.000793	tan	tan
THAP9	AMZ2P1	0.000924	tan	tan
THAP9	ANKRD27	0.002077	tan	tan
THAP9	ANKRD34A	2.81e-05	tan	tan
THAP9	APH1B	0.000734	tan	tan
THAP9	APTR	0.001724	tan	tan
THAP9	AQP11	0.000654	tan	tan
THAP9	ARHGEF7	0.007631	tan	tan
THAP9	ARMCX2	0.000143	tan	tan
THAP9	ARSG	0.001135	tan	tan
THAP9	ASB3	0.001727	tan	tan
THAP9	ATP2B1.AS1	0.000256	tan	NA
THAP9	ATP6V0E2.AS1	0.00065	tan	NA
THAP9	BCDIN3D	0.00362	tan	tan
THAP9	BCDIN3D.AS1	0.005523	tan	NA
THAP9	BCO1	2.16e-05	tan	tan
THAP9	BCYRN1	0.00016	tan	tan
THAP9	BHLHB9	0.003885	tan	tan
THAP9	BMF	0.001051	tan	tan
THAP9	BNIP3P17	0.000233	tan	tan
THAP9	BPHL	0.001124	tan	tan
THAP9	BRWD1.AS2	0.000151	tan	NA
THAP9	C11orf71	0.000369	tan	tan
THAP9	C15orf56	0.000277	tan	tan
THAP9	C16orf71	3.88e-05	tan	tan
THAP9	C17orf75	0.000635	tan	tan
THAP9	C18orf32	0.009421	tan	tan
THAP9	C2orf68	0.006056	tan	tan
THAP9	C3orf14	0.000246	tan	tan
THAP9	C3orf70	0.00075	tan	tan
THAP9	C6orf58	0.00012	tan	tan
THAP9	C7orf25	0.004589	tan	tan
THAP9	C7orf31	0.001549	tan	tan
THAP9	CACNB1	6.24e-06	tan	tan
THAP9	CARD8	0.001647	tan	tan
THAP9	CASC2	0.004944	tan	tan
THAP9	CASTOR3	0.002238	tan	tan
THAP9	CATSPERG	0.00038	tan	tan
THAP9	CBX6	0.000102	tan	tan
THAP9	CCDC113	0.000171	tan	tan
THAP9	CCDC121	0.013237	tan	tan
THAP9	CCDC142	0.007289	tan	tan
THAP9	CCDC148	0.000604	tan	tan
THAP9	CCDC149	0.000806	tan	tan
THAP9	CCDC158	0.000428	tan	tan
THAP9	CCDC174	0.001928	tan	tan
THAP9	CCDC30	0.005529	tan	tan
THAP9	CCZ1P	0.002058	tan	tan
THAP9	CDK20	0.001349	tan	tan
THAP9	CEBPB.AS1	0.000468	tan	NA
THAP9	CEBPG	0.002268	tan	tan
THAP9	CEP70	0.004707	tan	tan
THAP9	CFAP100	0.000206	tan	tan
THAP9	CFAP221	2.56e-05	tan	tan
THAP9	CFAP91	0.001001	tan	tan
THAP9	CFAP94	0.001313	tan	tan
THAP9	CHKA	0.000275	tan	tan
THAP9	CHPT1	0.000189	tan	tan
THAP9	CKMT2.AS1	0.004605	tan	NA
THAP9	CLMN	0.000976	tan	tan
THAP9	CNNM2	0.001111	tan	tan
THAP9	CNNM3.DT	0.000133	tan	NA
THAP9	COA5	0.00127	tan	tan
THAP9	COMMD7	0.000133	tan	tan
THAP9	COP1	0.001227	tan	tan
THAP9	COQ7	0.004879	tan	tan
THAP9	COQ8A	0.001739	tan	tan
THAP9	CRBN	0.012086	tan	tan
THAP9	CRTC3.AS1	0.006815	tan	NA
THAP9	CSE1L.AS1	0.000118	tan	NA
THAP9	CTBP2P7	0.000873	tan	tan
THAP9	CTC.338M12.4	0.001437	tan	NA
THAP9	CUTALP	0.003609	tan	tan
THAP9	CYB5RL	0.006993	tan	tan
THAP9	DCLK2	4.48e-05	tan	tan
THAP9	DDAH1	0.001286	tan	tan
THAP9	DDX39B.AS1	4.35e-05	tan	NA
THAP9	DENND2A	9.33e-05	tan	tan
THAP9	DEPDC5	0.003216	tan	tan
THAP9	DET1	0.005704	tan	tan
THAP9	DIP2C	0.00101	tan	tan
THAP9	DNAAF4	0.000835	tan	tan
THAP9	DNAH14	0.000851	tan	tan
THAP9	DNAH6	0.000626	tan	tan
THAP9	DNAI4	0.000145	tan	tan
THAP9	DNAJC27.AS1	0.000174	tan	NA
THAP9	DNAJC3.DT	0.001692	tan	NA
THAP9	DNMT3B	7.43e-05	tan	tan
THAP9	DPY19L2P3	0.005059	tan	tan
THAP9	DPY19L3	0.003673	tan	tan
THAP9	DRC3	0.000802	tan	tan
THAP9	DTX3	0.001257	tan	tan
THAP9	DZANK1	0.011088	tan	tan
THAP9	DZIP3	0.005203	tan	tan
THAP9	EDRF1.DT	0.001531	tan	NA
THAP9	EFCAB12	0.001479	tan	tan
THAP9	EFHB	0.000328	tan	tan
THAP9	EIF2AK3.DT	0.000734	tan	NA
THAP9	ELAPOR2	0.00315	tan	tan
THAP9	EMC1.AS1	0.00023	tan	NA
THAP9	ENDOV	0.000316	tan	tan
THAP9	ENO1.AS1	0.000129	tan	NA
THAP9	ENPP4	0.002066	tan	tan
THAP9	ENPP5	0.000158	tan	tan
THAP9	EPX	0.001801	tan	tan
THAP9	ERICH5	0.000164	tan	tan
THAP9	FAM149A	0.000168	tan	tan
THAP9	FAM200A	0.010475	tan	tan
THAP9	FAM200B	0.002004	tan	tan
THAP9	FAM47E.STBD1	0.001805	tan	NA
THAP9	FAM66C	0.001109	tan	tan
THAP9	FANCF	0.003783	tan	tan
THAP9	FANCL	0.006488	tan	tan
THAP9	FARP1	0.002229	tan	tan
THAP9	FBXL2	5.81e-05	tan	tan
THAP9	FIG4	0.001447	tan	tan
THAP9	FLJ37453	0.000993	tan	tan
THAP9	FLJ38576	0.000498	tan	tan
THAP9	FLVCR1	0.000308	tan	tan
THAP9	FLVCR1.DT	0.000402	tan	NA
THAP9	FN3K	0.000391	tan	tan
THAP9	FZD4.DT	2.01e-06	tan	NA
THAP9	GAB2	0.001414	tan	tan
THAP9	GARNL3	0.00081	tan	tan
THAP9	GARRE1	0.003629	tan	tan
THAP9	GASK1A	3.25e-05	tan	tan
THAP9	GHET1	0.002105	tan	tan
THAP9	GLB1L2	0.00018	tan	tan
THAP9	GLIDR	0.000166	tan	tan
THAP9	GLIPR1L1	0.000348	tan	tan
THAP9	GORAB	0.001038	tan	tan
THAP9	GPATCH1	0.006677	tan	tan
THAP9	GTSE1.DT	0.000402	tan	NA
THAP9	GVQW3	0.008802	tan	tan
THAP9	GYG2	2.69e-05	tan	tan
THAP9	HESX1	0.000541	tan	tan
THAP9	HINFP	0.009386	tan	tan
THAP9	HIPK1.AS1	6.87e-06	tan	NA
THAP9	HMGN5	9.77e-05	tan	tan
THAP9	HNRNPA1P10	0.002229	tan	tan
THAP9	HNRNPCP7	0.001205	tan	tan
THAP9	HOXA10	0.000235	tan	tan
THAP9	HSPBAP1	0.003383	tan	tan
THAP9	ICA1L	0.003467	tan	tan
THAP9	IL17RB	0.000953	tan	tan
THAP9	IQCB1	0.006866	tan	tan
THAP9	IRGQ	0.003277	tan	tan
THAP9	ITFG2	0.004498	tan	tan
THAP9	ITFG2.AS1	0.000151	tan	NA
THAP9	KANSL3	0.007608	tan	tan
THAP9	KCNE2	2.78e-05	tan	tan
THAP9	KCNK5	1.66e-05	tan	tan
THAP9	KCTD6	0.003361	tan	tan
THAP9	KCTD7	0.004429	tan	tan
THAP9	KIAA1958	0.007128	tan	tan
THAP9	KIF5C	0.000158	tan	tan
THAP9	KLHL23	0.003561	tan	tan
THAP9	KLHL24	0.007692	tan	tan
THAP9	KMT2B	0.007968	tan	tan
THAP9	KRBA1	0.001169	tan	tan
THAP9	LARGE1	0.001101	tan	tan
THAP9	LEKR1	0.00071	tan	tan
THAP9	LIN7A	0.000316	tan	tan
THAP9	LINC00449	0.00033	tan	tan
THAP9	LINC00543	2.2e-06	tan	tan
THAP9	LINC01003	0.000588	tan	tan
THAP9	LINC01012	0.000398	tan	tan
THAP9	LINC01144	0.000516	tan	tan
THAP9	LINC01291	5.91e-06	tan	tan
THAP9	LINC01534	0.002452	tan	tan
THAP9	LINC01535	0.000359	tan	tan
THAP9	LINC02210	0.006461	tan	tan
THAP9	LINC02371	5.64e-05	tan	tan
THAP9	LINC02453	0.001169	tan	tan
THAP9	LINC02585	0.000181	tan	tan
THAP9	LIPT1	0.002567	tan	tan
THAP9	LIPT2	0.002508	tan	tan
THAP9	LMCD1.AS1	0.0003	tan	NA
THAP9	LOC100128398	0.000735	tan	tan
THAP9	LOC100129215	1.81e-05	tan	tan
THAP9	LOC100130357	0.000529	tan	tan
THAP9	LOC100130950	0.00394	tan	tan
THAP9	LOC100132249	0.002018	tan	tan
THAP9	LOC100379224	0.000179	tan	tan
THAP9	LOC100419847	0.000312	tan	tan
THAP9	LOC100505549	0.001511	tan	tan
THAP9	LOC100505715	0.002669	tan	tan
THAP9	LOC100505915	0.000371	tan	tan
THAP9	LOC100506083	0.000463	tan	tan
THAP9	LOC100506302	9.02e-05	tan	tan
THAP9	LOC100507291	0.002074	tan	tan
THAP9	LOC100507564	0.001228	tan	tan
THAP9	LOC100996419	0.001415	tan	tan
THAP9	LOC101926913	0.00012	tan	tan
THAP9	LOC101926977	0.000781	tan	tan
THAP9	LOC101927811	6.13e-06	tan	tan
THAP9	LOC101927837	7.88e-05	tan	tan
THAP9	LOC101928063	0.001665	tan	tan
THAP9	LOC101928069	0.000125	tan	tan
THAP9	LOC101928118	0.000132	tan	tan
THAP9	LOC101928530	5.8e-05	tan	tan
THAP9	LOC101928982	2.82e-05	tan	tan
THAP9	LOC101929054	0.000694	tan	tan
THAP9	LOC101930085	0.001702	tan	tan
THAP9	LOC102724057	0.000369	tan	tan
THAP9	LOC102724064	0.001758	tan	tan
THAP9	LOC105369779	0.000291	tan	tan
THAP9	LOC105369911	0.000253	tan	tan
THAP9	LOC105371083	0.000131	tan	tan
THAP9	LOC105372352	0.000131	tan	tan
THAP9	LOC105374114	9.51e-06	tan	tan
THAP9	LOC105378083	0.000132	tan	tan
THAP9	LOC105378663	5.63e-05	tan	tan
THAP9	LOC105379194	9.59e-06	tan	tan
THAP9	LOC106699570	0.00036	tan	tan
THAP9	LOC114841040	0.000374	tan	tan
THAP9	LOC339666	0.000914	tan	tan
THAP9	LOC340268	1.59e-05	tan	tan
THAP9	LOC400684	9.17e-05	tan	tan
THAP9	LOC554249	6.55e-05	tan	tan
THAP9	LOC642361	0.000497	tan	tan
THAP9	LOH12CR2	0.000681	tan	tan
THAP9	LRRC37B	0.002993	tan	tan
THAP9	LRRIQ3	0.000369	tan	tan
THAP9	LYRM1	0.001069	tan	tan
THAP9	MADD	0.001782	tan	tan
THAP9	MAGED1	5.12e-05	tan	tan
THAP9	MAGED2	0.000522	tan	tan
THAP9	MAGEH1	4.63e-05	tan	tan
THAP9	MAN2A2	0.002858	tan	tan
THAP9	MCEE	0.006294	tan	tan
THAP9	METTL18	0.002123	tan	tan
THAP9	MFF.DT	0.000908	tan	NA
THAP9	MFSD6L	3.34e-06	tan	tan
THAP9	MIR4292	0.002255	tan	tan
THAP9	MIR4477A	1.68e-05	tan	tan
THAP9	MIR4477B	7.07e-05	tan	tan
THAP9	MIR600HG	0.003833	tan	tan
THAP9	MIR6797	6.94e-05	tan	tan
THAP9	MOAP1	0.004661	tan	tan
THAP9	MPL	0.001272	tan	tan
THAP9	MPP2	0.000376	tan	tan
THAP9	MRPL20.AS1	0.002742	tan	NA
THAP9	MTMR4	0.010466	tan	tan
THAP9	MUC15	2.72e-05	tan	tan
THAP9	MYEF2	0.001878	tan	tan
THAP9	NAA40	0.008945	tan	tan
THAP9	NATD1	0.000995	tan	tan
THAP9	NBPF1	0.009122	tan	tan
THAP9	NBPF15	0.003248	tan	tan
THAP9	NBPF25P	0.011941	tan	tan
THAP9	NINL	0.000354	tan	tan
THAP9	NIPSNAP3B	0.002215	tan	tan
THAP9	NPB	9.12e-05	tan	tan
THAP9	NPTXR	2.56e-05	tan	tan
THAP9	NR2F2	5.64e-05	tan	tan
THAP9	NRL	0.000992	tan	tan
THAP9	NSUN7	0.005737	tan	tan
THAP9	NUDT16	0.001757	tan	tan
THAP9	NUDT19	0.001242	tan	tan
THAP9	NUDT7	1.26e-05	tan	tan
THAP9	OR6E1P	6.03e-05	tan	tan
THAP9	OR7E116P	0.000281	tan	tan
THAP9	OR7E29P	0.000128	tan	tan
THAP9	OR7E7P	8.21e-05	tan	tan
THAP9	OTUD3	0.011574	tan	tan
THAP9	OVOL2	0.001022	tan	tan
THAP9	PACS2	0.002495	tan	tan
THAP9	PACSIN1	7.23e-05	tan	tan
THAP9	PAIP2B	0.005897	tan	tan
THAP9	PAWRP2	1.77e-05	tan	tan
THAP9	PCBP1.AS1	0.003657	tan	NA
THAP9	PDE6B	1.64e-05	tan	tan
THAP9	PDE8B	8.14e-05	tan	tan
THAP9	PDE9A	5.57e-05	tan	tan
THAP9	PGS1	0.004702	tan	tan
THAP9	PHC1	0.004375	tan	tan
THAP9	PHF7	0.00118	tan	tan
THAP9	PIGP	0.001288	tan	tan
THAP9	PLEKHG4B	3.99e-05	tan	tan
THAP9	PNRC2	0.008821	tan	tan
THAP9	POGZ	0.011441	tan	tan
THAP9	POM121L2	3.07e-05	tan	tan
THAP9	PPIL6	0.00045	tan	tan
THAP9	PPM1L	0.000394	tan	tan
THAP9	PPP1R42	0.000112	tan	tan
THAP9	PPP1R9A	0.001813	tan	tan
THAP9	PPP5D1	0.000547	tan	tan
THAP9	PROSER3	0.010721	tan	tan
THAP9	PRR19	0.000252	tan	tan
THAP9	PRSS16	0.000927	tan	tan
THAP9	PSMG3.AS1	0.000129	tan	NA
THAP9	PTBP2	0.00398	tan	tan
THAP9	PTGER4P2.CDK2AP2P2	0.000765	tan	NA
THAP9	PTOV1.AS1	0.002652	tan	NA
THAP9	QPCT	1.72e-05	tan	tan
THAP9	QRFP	6.9e-05	tan	tan
THAP9	QRICH2	0.000314	tan	tan
THAP9	RAB36	0.000378	tan	tan
THAP9	RANBP17	0.001549	tan	tan
THAP9	RBBP4	0.014615	tan	tan
THAP9	RBM11	0.000325	tan	tan
THAP9	RBM4B	0.005596	tan	tan
THAP9	RCAN3	0.004462	tan	tan
THAP9	RDM1	0.000553	tan	tan
THAP9	REPIN1	0.002675	tan	tan
THAP9	RERE	0.006426	tan	tan
THAP9	RFXAP	0.007076	tan	tan
THAP9	RN7SL526P	3.75e-05	tan	tan
THAP9	RN7SL605P	5.9e-05	tan	tan
THAP9	RNA5SP283	0.000173	tan	tan
THAP9	RNA5SP530	3.64e-05	tan	tan
THAP9	RNF32	0.000546	tan	tan
THAP9	RNU2.22P	0.003386	tan	NA
THAP9	RNU6.30P	0.000188	tan	NA
THAP9	RNU6.481P	1.07e-05	tan	NA
THAP9	RNU6.703P	0.000443	tan	NA
THAP9	RORA	0.000174	tan	tan
THAP9	RPGRIP1	0.001497	tan	tan
THAP9	RPL10P2	1.11e-05	tan	tan
THAP9	RPL23AP49	3.37e-05	tan	tan
THAP9	RPL34.DT	0.004436	tan	NA
THAP9	RPS10P11	8.09e-05	tan	tan
THAP9	RPS2P14	0.000828	tan	tan
THAP9	RPSAP70	1.96e-05	tan	tan
THAP9	RRAGB	0.001779	tan	tan
THAP9	RSPH10B2	3.47e-05	tan	tan
THAP9	RUFY3	0.006733	tan	tan
THAP9	RWDD2A	0.002502	tan	tan
THAP9	SARM1	0.004799	tan	tan
THAP9	SAXO1	5.04e-05	tan	tan
THAP9	SAXO2	0.000888	tan	tan
THAP9	SCAI	0.033017	tan	tan
THAP9	SCGB2B2	0.000175	tan	tan
THAP9	SEC23A.AS1	7.24e-06	tan	NA
THAP9	SEC61A2	0.002287	tan	tan
THAP9	SEPTIN4.AS1	1.13e-05	tan	NA
THAP9	SETD6	0.001823	tan	tan
THAP9	SFXN2	0.001376	tan	tan
THAP9	SH2D7	9.06e-05	tan	tan
THAP9	SH3GL2	0.000178	tan	tan
THAP9	SIAH1	0.000556	tan	tan
THAP9	SLC25A4	0.000893	tan	tan
THAP9	SLC25A42	0.000886	tan	tan
THAP9	SLC2A8	0.000379	tan	tan
THAP9	SLC37A4	0.005316	tan	tan
THAP9	SLCO4C1	1.71e-05	tan	tan
THAP9	SMARCE1P3	4e-05	tan	tan
THAP9	SMIM8	0.002862	tan	tan
THAP9	SNORA15B.1	0.000148	tan	NA
THAP9	SPAG8	0.002436	tan	tan
THAP9	SPART.AS1	0.001143	tan	NA
THAP9	SPATA32	9.74e-05	tan	tan
THAP9	SPATA4	0.000162	tan	tan
THAP9	SPATA41	5.37e-06	tan	tan
THAP9	SPATA45	6.03e-05	tan	tan
THAP9	SPATA6	0.003497	tan	tan
THAP9	SPDYE3	0.002149	tan	tan
THAP9	SPIN2P1	8.88e-06	tan	tan
THAP9	SRD5A3.AS1	0.000166	tan	NA
THAP9	SRP14.AS1	0.00073	tan	NA
THAP9	STKLD1	0.001991	tan	tan
THAP9	STOX2	0.003317	tan	tan
THAP9	STX18.AS1	0.00702	tan	NA
THAP9	SUGP2	0.010236	tan	tan
THAP9	SV2C	6.11e-05	tan	tan
THAP9	SVIP	0.006429	tan	tan
THAP9	TADA1	0.005391	tan	tan
THAP9	TADA2A	0.010191	tan	tan
THAP9	TAF1A.AS1	0.000612	tan	NA
THAP9	TBKBP1	9.38e-05	tan	tan
THAP9	TCAM1P	0.000105	tan	tan
THAP9	TCEAL4	0.000117	tan	tan
THAP9	TCEANC	0.00682	tan	tan
THAP9	TCEANC2	0.007634	tan	tan
THAP9	TDRP	1.66e-05	tan	tan
THAP9	TIGD7	0.000948	tan	tan
THAP9	TMEM147	0.000124	tan	tan
THAP9	TMEM232	0.001538	tan	tan
THAP9	TMEM266	0.000281	tan	tan
THAP9	TMEM35A	3.21e-05	tan	tan
THAP9	TMEM44	0.00021	tan	tan
THAP9	TMEM62	0.000449	tan	tan
THAP9	TMEM98	0.000113	tan	tan
THAP9	TNKS2.AS1	1.05e-05	tan	NA
THAP9	TNRC6C	0.001738	tan	tan
THAP9	TOMM20L	0.001354	tan	tan
THAP9	TRAPPC9	0.000785	tan	tan
THAP9	TSPY26P	0.000459	tan	tan
THAP9	TSPYL5	9.18e-05	tan	tan
THAP9	TTC23L.AS1	0.000461	tan	NA
THAP9	TTC32	0.001985	tan	tan
THAP9	UBE2D4	0.00187	tan	tan
THAP9	UBE2F.SCLY	1.33e-05	tan	NA
THAP9	UGDH.AS1	0.005745	tan	NA
THAP9	UNK	0.008663	tan	tan
THAP9	UQCC1	0.003803	tan	tan
THAP9	USP6	0.000403	tan	tan
THAP9	UXS1	0.000391	tan	tan
THAP9	VN1R108P	0.001304	tan	tan
THAP9	VN1R2	4.45e-06	tan	tan
THAP9	VPS33B.DT	0.000235	tan	NA
THAP9	WDFY3.AS2	0.001855	tan	NA
THAP9	WDR19	0.0119	tan	tan
THAP9	WDR48	0.004239	tan	tan
THAP9	WDR87BP	0.000293	tan	tan
THAP9	WDR92	0.000611	tan	tan
THAP9	WFS1	4.96e-05	tan	tan
THAP9	WNK3	0.000455	tan	tan
THAP9	XKR9	0.00015	tan	tan
THAP9	XPR1	0.000319	tan	tan
THAP9	ZBED3	0.002645	tan	tan
THAP9	ZBED3.AS1	0.000563	tan	NA
THAP9	ZBED8	0.011836	tan	tan
THAP9	ZBED9	0.002163	tan	tan
THAP9	ZBTB10	0.002977	tan	tan
THAP9	ZBTB26	0.012081	tan	tan
THAP9	ZBTB34	0.00781	tan	tan
THAP9	ZBTB8A	0.007007	tan	tan
THAP9	ZC2HC1C	0.002435	tan	tan
THAP9	ZC4H2	0.000129	tan	tan
THAP9	ZCWPW2	0.000728	tan	tan
THAP9	ZDHHC23	0.007759	tan	tan
THAP9	ZFP14	0.010368	tan	tan
THAP9	ZFP28	0.000528	tan	tan
THAP9	ZFP3	0.00102	tan	tan
THAP9	ZFP30	0.007637	tan	tan
THAP9	ZFP37	0.000955	tan	tan
THAP9	ZFP69B	0.0004	tan	tan
THAP9	ZKSCAN3	0.003442	tan	tan
THAP9	ZKSCAN4	0.006454	tan	tan
THAP9	ZKSCAN8	0.013298	tan	tan
THAP9	ZNF101	0.002903	tan	tan
THAP9	ZNF112	0.012573	tan	tan
THAP9	ZNF135	2.49e-05	tan	tan
THAP9	ZNF136	0.010685	tan	tan
THAP9	ZNF14	0.00761	tan	tan
THAP9	ZNF146	0.008405	tan	tan
THAP9	ZNF180	0.015811	tan	tan
THAP9	ZNF181	0.012804	tan	tan
THAP9	ZNF2	0.007217	tan	tan
THAP9	ZNF214	0.008106	tan	tan
THAP9	ZNF225	0.01109	tan	tan
THAP9	ZNF227	0.016251	tan	tan
THAP9	ZNF229	0.000356	tan	tan
THAP9	ZNF230	0.014386	tan	tan
THAP9	ZNF233	0.002011	tan	tan
THAP9	ZNF234	0.010289	tan	tan
THAP9	ZNF235	0.007747	tan	tan
THAP9	ZNF250	0.006963	tan	tan
THAP9	ZNF260	0.011075	tan	tan
THAP9	ZNF275	0.002025	tan	tan
THAP9	ZNF283	0.007601	tan	tan
THAP9	ZNF284	0.004598	tan	tan
THAP9	ZNF285	0.001512	tan	tan
THAP9	ZNF30	0.003531	tan	tan
THAP9	ZNF302	0.004941	tan	tan
THAP9	ZNF341	0.000446	tan	tan
THAP9	ZNF341.AS1	1.59e-05	tan	NA
THAP9	ZNF345	0.009217	tan	tan
THAP9	ZNF354C	0.001074	tan	tan
THAP9	ZNF362	0.00289	tan	tan
THAP9	ZNF383	0.014266	tan	tan
THAP9	ZNF391	0.001094	tan	tan
THAP9	ZNF397	0.010798	tan	tan
THAP9	ZNF404	0.001054	tan	tan
THAP9	ZNF425	0.000702	tan	tan
THAP9	ZNF433.AS1	0.000261	tan	NA
THAP9	ZNF442	0.00144	tan	tan
THAP9	ZNF45	0.013303	tan	tan
THAP9	ZNF461	0.015532	tan	tan
THAP9	ZNF470	0.00256	tan	tan
THAP9	ZNF471	0.000423	tan	tan
THAP9	ZNF473	0.007238	tan	tan
THAP9	ZNF485	0.001195	tan	tan
THAP9	ZNF491	0.003289	tan	tan
THAP9	ZNF501	0.001921	tan	tan
THAP9	ZNF507	0.010396	tan	tan
THAP9	ZNF512	0.002793	tan	tan
THAP9	ZNF519	0.009608	tan	tan
THAP9	ZNF527	0.014347	tan	tan
THAP9	ZNF528.AS1	0.000417	tan	NA
THAP9	ZNF529.AS1	0.001309	tan	NA
THAP9	ZNF542P	0.000195	tan	tan
THAP9	ZNF554	0.007477	tan	tan
THAP9	ZNF555	0.0075	tan	tan
THAP9	ZNF557	0.008236	tan	tan
THAP9	ZNF565	0.007727	tan	tan
THAP9	ZNF566	0.016992	tan	tan
THAP9	ZNF567	0.014781	tan	tan
THAP9	ZNF570	0.003757	tan	tan
THAP9	ZNF571	0.009793	tan	tan
THAP9	ZNF572	0.001625	tan	tan
THAP9	ZNF573	0.002101	tan	tan
THAP9	ZNF575	6.64e-05	tan	tan
THAP9	ZNF582	0.000213	tan	tan
THAP9	ZNF582.AS1	0.000162	tan	NA
THAP9	ZNF585A	0.011651	tan	tan
THAP9	ZNF585B	0.015571	tan	tan
THAP9	ZNF589	0.005949	tan	tan
THAP9	ZNF605	0.00829	tan	tan
THAP9	ZNF607	0.003581	tan	tan
THAP9	ZNF610	0.001417	tan	tan
THAP9	ZNF620	0.014908	tan	tan
THAP9	ZNF625	0.003586	tan	tan
THAP9	ZNF627	0.015199	tan	tan
THAP9	ZNF649	0.000893	tan	tan
THAP9	ZNF660	0.000373	tan	tan
THAP9	ZNF667	0.000229	tan	tan
THAP9	ZNF667.AS1	9.22e-05	tan	NA
THAP9	ZNF669	0.007448	tan	tan
THAP9	ZNF670	0.009314	tan	tan
THAP9	ZNF677	0.000175	tan	tan
THAP9	ZNF684	0.00262	tan	tan
THAP9	ZNF704	0.00452	tan	tan
THAP9	ZNF717	0.001224	tan	tan
THAP9	ZNF75A	0.001452	tan	tan
THAP9	ZNF77	0.005764	tan	tan
THAP9	ZNF778	0.002582	tan	tan
THAP9	ZNF781	0.000394	tan	tan
THAP9	ZNF782	0.00925	tan	tan
THAP9	ZNF790	0.005823	tan	tan
THAP9	ZNF790.AS1	0.000565	tan	NA
THAP9	ZNF792	0.001748	tan	tan
THAP9	ZNF793	0.00286	tan	tan
THAP9	ZNF829	0.005971	tan	tan
THAP9	ZNF835	2.3e-05	tan	tan
THAP9	ZNF84.DT	3.67e-05	tan	NA
THAP9	ZNF844	0.005654	tan	tan
THAP9	ZNF853	0.000627	tan	tan
THAP9	ZNF860	4.77e-05	tan	tan
THAP9	ZNF875	0.007927	tan	tan
THAP9	ZNF879	0.000753	tan	tan
THAP9	ZSCAN18	0.000411	tan	tan
THAP9	ZSCAN21	0.007743	tan	tan
THAP9	ZSCAN23	0.003261	tan	tan
THAP9	ZSCAN26	0.006172	tan	tan
THAP9	ZSCAN5A	0.000946	tan	tan

## Sheet: BRCA_normal
gene1	gene2	correlation	module1	module2
THAP9	AAK1	0.09123	turquoise	turquoise
THAP9	AASDH	0.333932	turquoise	turquoise
THAP9	AASDHPPT	0.298888	turquoise	turquoise
THAP9	AASS	0.073996	turquoise	turquoise
THAP9	ABALON	0.031505	turquoise	turquoise
THAP9	ABCA10	0.09397	turquoise	turquoise
THAP9	ABCA11P	0.158547	turquoise	turquoise
THAP9	ABCA2	0.033855	turquoise	turquoise
THAP9	ABCB10	0.16531	turquoise	turquoise
THAP9	ABCB7	0.125793	turquoise	turquoise
THAP9	ABCE1	0.252081	turquoise	turquoise
THAP9	ABCG2	0.110834	turquoise	turquoise
THAP9	ABHD10	0.180783	turquoise	turquoise
THAP9	ABHD13	0.209247	turquoise	turquoise
THAP9	ABHD17B	0.228806	turquoise	turquoise
THAP9	ABHD18	0.173658	turquoise	turquoise
THAP9	ABHD2	0.142969	turquoise	turquoise
THAP9	ABI1	0.318451	turquoise	turquoise
THAP9	ABITRAM	0.248723	turquoise	turquoise
THAP9	ABL2	0.111951	turquoise	turquoise
THAP9	ABO	0.095124	turquoise	turquoise
THAP9	ABRAXAS1	0.212768	turquoise	turquoise
THAP9	ABRAXAS2	0.250536	turquoise	turquoise
THAP9	ACAD8	0.114065	turquoise	turquoise
THAP9	ACAP2	0.201959	turquoise	turquoise
THAP9	ACBD3	0.272676	turquoise	turquoise
THAP9	ACBD3.AS1	0.151508	turquoise	NA
THAP9	ACBD5	0.088557	turquoise	turquoise
THAP9	ACOXL.AS1	0.103262	turquoise	NA
THAP9	ACP1	0.184428	turquoise	turquoise
THAP9	ACSM4	0.121363	turquoise	turquoise
THAP9	ACTL6A	0.212372	turquoise	turquoise
THAP9	ACTR2	0.092571	turquoise	turquoise
THAP9	ACTR6	0.203392	turquoise	turquoise
THAP9	ACTR8	0.203851	turquoise	turquoise
THAP9	ACVR1	0.096772	turquoise	turquoise
THAP9	ACVR1B	0.138666	turquoise	turquoise
THAP9	ACVR2A	0.196079	turquoise	turquoise
THAP9	ACVR2B	0.132004	turquoise	turquoise
THAP9	ACYP1	0.158959	turquoise	turquoise
THAP9	ADAM10	0.187497	turquoise	turquoise
THAP9	ADAM17	0.145593	turquoise	turquoise
THAP9	ADAM1B	0.155696	turquoise	turquoise
THAP9	ADAM21	0.104663	turquoise	turquoise
THAP9	ADAM32	0.161505	turquoise	turquoise
THAP9	ADAM9	0.075363	turquoise	turquoise
THAP9	ADAMTS5	0.065367	turquoise	turquoise
THAP9	ADAR	0.131387	turquoise	turquoise
THAP9	ADAT1	0.126066	turquoise	turquoise
THAP9	ADGRA3	0.147014	turquoise	turquoise
THAP9	ADGRG6	0.136168	turquoise	turquoise
THAP9	ADGRL2	0.092303	turquoise	turquoise
THAP9	ADH6	0.150257	turquoise	turquoise
THAP9	ADNP	0.325153	turquoise	turquoise
THAP9	ADNP.AS1	0.147134	turquoise	NA
THAP9	ADNP2	0.245575	turquoise	turquoise
THAP9	ADO	0.138	turquoise	turquoise
THAP9	ADPGK	0.154289	turquoise	turquoise
THAP9	ADPRM	0.162859	turquoise	turquoise
THAP9	ADSS2	0.227344	turquoise	turquoise
THAP9	AEBP2	0.241738	turquoise	turquoise
THAP9	AFAP1	0.118026	turquoise	turquoise
THAP9	AFDN	0.220037	turquoise	turquoise
THAP9	AFF1	0.080017	turquoise	turquoise
THAP9	AFF4	0.260614	turquoise	turquoise
THAP9	AFG1L	0.101568	turquoise	turquoise
THAP9	AFTPH	0.304318	turquoise	turquoise
THAP9	AGAP1	0.130801	turquoise	turquoise
THAP9	AGBL3	0.140294	turquoise	turquoise
THAP9	AGBL4	0.113277	turquoise	turquoise
THAP9	AGGF1	0.240164	turquoise	turquoise
THAP9	AGK	0.234698	turquoise	turquoise
THAP9	AGO1	0.239352	turquoise	turquoise
THAP9	AGO2	0.117233	turquoise	turquoise
THAP9	AGO3	0.246797	turquoise	turquoise
THAP9	AGO4	0.25804	turquoise	turquoise
THAP9	AGPAT5	0.156381	turquoise	turquoise
THAP9	AGTPBP1	0.076745	turquoise	turquoise
THAP9	AHCTF1	0.233959	turquoise	turquoise
THAP9	AHCYL1	0.066706	turquoise	turquoise
THAP9	AHCYL2	0.141131	turquoise	turquoise
THAP9	AHI1	0.258953	turquoise	turquoise
THAP9	AHR	0.143189	turquoise	turquoise
THAP9	AIMP1	0.264579	turquoise	turquoise
THAP9	AK4	0.064089	turquoise	turquoise
THAP9	AK9	0.291947	turquoise	turquoise
THAP9	AKAP10	0.270684	turquoise	turquoise
THAP9	AKAP11	0.10752	turquoise	turquoise
THAP9	AKAP13	0.145275	turquoise	turquoise
THAP9	AKAP7	0.07626	turquoise	turquoise
THAP9	AKAP9	0.191136	turquoise	turquoise
THAP9	AKIRIN1	0.103951	turquoise	turquoise
THAP9	AKR1E2	0.090898	turquoise	turquoise
THAP9	ALG10	0.229841	turquoise	turquoise
THAP9	ALG10B	0.23722	turquoise	turquoise
THAP9	ALG11	0.185067	turquoise	turquoise
THAP9	ALG13	0.299871	turquoise	turquoise
THAP9	ALG2	0.122516	turquoise	turquoise
THAP9	ALG6	0.219351	turquoise	turquoise
THAP9	ALKBH1	0.156565	turquoise	turquoise
THAP9	ALKBH3.AS1	0.131035	turquoise	NA
THAP9	ALKBH8	0.268213	turquoise	turquoise
THAP9	ALMS1	0.218781	turquoise	turquoise
THAP9	ALMS1.IT1	0.16139	turquoise	NA
THAP9	ALOX12.AS1	0.138252	turquoise	NA
THAP9	ALPK1	0.169664	turquoise	turquoise
THAP9	ALS2	0.265826	turquoise	turquoise
THAP9	AMACR	0.066834	turquoise	turquoise
THAP9	AMD1	0.159749	turquoise	turquoise
THAP9	AMER1	0.141836	turquoise	turquoise
THAP9	AMIGO1	0.092545	turquoise	turquoise
THAP9	AMMECR1	0.139537	turquoise	turquoise
THAP9	AMMECR1L	0.215035	turquoise	turquoise
THAP9	AMN1	0.201709	turquoise	turquoise
THAP9	AMOTL1	0.125428	turquoise	turquoise
THAP9	AMZ2P1	0.11201	turquoise	turquoise
THAP9	ANAPC1	0.236	turquoise	turquoise
THAP9	ANAPC4	0.334341	turquoise	turquoise
THAP9	ANAPC5	0.154986	turquoise	turquoise
THAP9	ANGEL1	0.16565	turquoise	turquoise
THAP9	ANGEL2	0.349938	turquoise	turquoise
THAP9	ANKEF1	0.115555	turquoise	turquoise
THAP9	ANKFY1	0.150806	turquoise	turquoise
THAP9	ANKHD1.EIF4EBP3	0.117692	turquoise	NA
THAP9	ANKIB1	0.185209	turquoise	turquoise
THAP9	ANKLE2	0.140811	turquoise	turquoise
THAP9	ANKMY2	0.177343	turquoise	turquoise
THAP9	ANKRA2	0.246675	turquoise	turquoise
THAP9	ANKRD10	0.205098	turquoise	turquoise
THAP9	ANKRD12	0.242968	turquoise	turquoise
THAP9	ANKRD13A	0.172959	turquoise	turquoise
THAP9	ANKRD13C	0.231783	turquoise	turquoise
THAP9	ANKRD17	0.25006	turquoise	turquoise
THAP9	ANKRD18EP	0.256749	turquoise	turquoise
THAP9	ANKRD26	0.22725	turquoise	turquoise
THAP9	ANKRD27	0.15205	turquoise	turquoise
THAP9	ANKRD28	0.266871	turquoise	turquoise
THAP9	ANKRD31	0.169929	turquoise	turquoise
THAP9	ANKRD36C	0.17863	turquoise	turquoise
THAP9	ANKRD49	0.196249	turquoise	turquoise
THAP9	ANKRD50	0.178046	turquoise	turquoise
THAP9	ANKRD52	0.12842	turquoise	turquoise
THAP9	ANKRD6	0.163857	turquoise	turquoise
THAP9	ANOS1	0.09775	turquoise	turquoise
THAP9	ANP32E	0.152705	turquoise	turquoise
THAP9	ANXA3	0.104755	turquoise	turquoise
THAP9	AP1AR	0.257732	turquoise	turquoise
THAP9	AP1G1	0.266056	turquoise	turquoise
THAP9	AP2B1	0.151414	turquoise	turquoise
THAP9	AP3B1	0.156235	turquoise	turquoise
THAP9	AP3M1	0.132479	turquoise	turquoise
THAP9	AP3M2	0.232341	turquoise	turquoise
THAP9	AP4B1	0.12432	turquoise	turquoise
THAP9	AP4E1	0.176649	turquoise	turquoise
THAP9	AP4S1	0.191487	turquoise	turquoise
THAP9	AP5B1	0.026611	turquoise	turquoise
THAP9	AP5M1	0.278607	turquoise	turquoise
THAP9	APAF1	0.244129	turquoise	turquoise
THAP9	APC	0.167616	turquoise	turquoise
THAP9	APH1B	0.141127	turquoise	turquoise
THAP9	API5	0.365176	turquoise	turquoise
THAP9	APLF	0.171021	turquoise	turquoise
THAP9	APOOL	0.12126	turquoise	turquoise
THAP9	APPBP2	0.178311	turquoise	turquoise
THAP9	APPL1	0.340617	turquoise	turquoise
THAP9	APPL2	0.137258	turquoise	turquoise
THAP9	AQP11	0.103062	turquoise	turquoise
THAP9	AQR	0.289727	turquoise	turquoise
THAP9	ARAP2	0.161084	turquoise	turquoise
THAP9	ARCN1	0.116954	turquoise	turquoise
THAP9	AREL1	0.208026	turquoise	turquoise
THAP9	ARF6	0.142223	turquoise	turquoise
THAP9	ARFGAP3	0.143166	turquoise	turquoise
THAP9	ARFGEF1	0.21334	turquoise	turquoise
THAP9	ARFGEF2	0.237287	turquoise	turquoise
THAP9	ARFIP1	0.273336	turquoise	turquoise
THAP9	ARG1	0.171826	turquoise	turquoise
THAP9	ARG2	0.117538	turquoise	turquoise
THAP9	ARGLU1	0.16904	turquoise	turquoise
THAP9	ARHGAP12	0.306184	turquoise	turquoise
THAP9	ARHGAP26	0.139601	turquoise	turquoise
THAP9	ARHGAP29	0.094603	turquoise	turquoise
THAP9	ARHGAP35	0.122133	turquoise	turquoise
THAP9	ARHGAP5	0.290985	turquoise	turquoise
THAP9	ARHGEF11	0.090424	turquoise	turquoise
THAP9	ARHGEF12	0.222636	turquoise	turquoise
THAP9	ARHGEF26	0.092651	turquoise	turquoise
THAP9	ARHGEF28	0.13333	turquoise	turquoise
THAP9	ARHGEF3	0.129798	turquoise	turquoise
THAP9	ARHGEF9	0.136828	turquoise	turquoise
THAP9	ARID1A	0.185035	turquoise	turquoise
THAP9	ARID1B	0.218131	turquoise	turquoise
THAP9	ARID2	0.268527	turquoise	turquoise
THAP9	ARID4A	0.179554	turquoise	turquoise
THAP9	ARID4B	0.321841	turquoise	turquoise
THAP9	ARID5B	0.124455	turquoise	turquoise
THAP9	ARIH1	0.308952	turquoise	turquoise
THAP9	ARIH2	0.130204	turquoise	turquoise
THAP9	ARL1	0.166047	turquoise	turquoise
THAP9	ARL10	0.145478	turquoise	turquoise
THAP9	ARL13A	0.145858	turquoise	turquoise
THAP9	ARL13B	0.168411	turquoise	turquoise
THAP9	ARL14EP	0.221087	turquoise	turquoise
THAP9	ARL17A	0.148281	turquoise	turquoise
THAP9	ARL4C	0.144496	turquoise	turquoise
THAP9	ARL5A	0.121315	turquoise	turquoise
THAP9	ARL5B	0.138451	turquoise	turquoise
THAP9	ARL6	0.241029	turquoise	turquoise
THAP9	ARL6IP6	0.141152	turquoise	turquoise
THAP9	ARL8B	0.13123	turquoise	turquoise
THAP9	ARMC1	0.153579	turquoise	turquoise
THAP9	ARMC10	0.144875	turquoise	turquoise
THAP9	ARMC2	0.125367	turquoise	turquoise
THAP9	ARMC8	0.122126	turquoise	turquoise
THAP9	ARMCX3	0.143624	turquoise	turquoise
THAP9	ARMH3	0.167466	turquoise	turquoise
THAP9	ARMH4	0.075228	turquoise	turquoise
THAP9	ARNT	0.075739	turquoise	turquoise
THAP9	ARNTL	0.129655	turquoise	turquoise
THAP9	ARNTL2.AS1	0.008087	turquoise	NA
THAP9	ARPP19	0.074644	turquoise	turquoise
THAP9	ARRB1	0.027324	turquoise	turquoise
THAP9	ARRDC4	0.129181	turquoise	turquoise
THAP9	ARSK	0.151788	turquoise	turquoise
THAP9	ASAH2	0.156921	turquoise	turquoise
THAP9	ASAH2B	0.15947	turquoise	turquoise
THAP9	ASB1	0.085351	turquoise	turquoise
THAP9	ASB16.AS1	0.142824	turquoise	NA
THAP9	ASB3	0.134865	turquoise	turquoise
THAP9	ASB7	0.300701	turquoise	turquoise
THAP9	ASCC1	0.082709	turquoise	turquoise
THAP9	ASCC3	0.267124	turquoise	turquoise
THAP9	ASF1A	0.168306	turquoise	turquoise
THAP9	ASH1L	0.200758	turquoise	turquoise
THAP9	ASH1L.AS1	0.169257	turquoise	NA
THAP9	ASH2L	0.083662	turquoise	turquoise
THAP9	ASNS	0.146026	turquoise	turquoise
THAP9	ASTE1	0.196472	turquoise	turquoise
THAP9	ASXL1	0.180917	turquoise	turquoise
THAP9	ASXL2	0.191483	turquoise	turquoise
THAP9	ATAD1	0.285613	turquoise	turquoise
THAP9	ATAD2B	0.26418	turquoise	turquoise
THAP9	ATAD5	0.174571	turquoise	turquoise
THAP9	ATE1	0.188974	turquoise	turquoise
THAP9	ATE1.AS1	0.10176	turquoise	NA
THAP9	ATF1	0.245553	turquoise	turquoise
THAP9	ATF2	0.22336	turquoise	turquoise
THAP9	ATF6	0.285253	turquoise	turquoise
THAP9	ATF7	0.131545	turquoise	turquoise
THAP9	ATF7IP	0.246223	turquoise	turquoise
THAP9	ATF7IP2	0.116591	turquoise	turquoise
THAP9	ATG10	0.120156	turquoise	turquoise
THAP9	ATG12	0.088547	turquoise	turquoise
THAP9	ATG14	0.214629	turquoise	turquoise
THAP9	ATG2B	0.310227	turquoise	turquoise
THAP9	ATM	0.199442	turquoise	turquoise
THAP9	ATMIN	0.16077	turquoise	turquoise
THAP9	ATP10D	0.139243	turquoise	turquoise
THAP9	ATP11A	0.093799	turquoise	turquoise
THAP9	ATP11B	0.151055	turquoise	turquoise
THAP9	ATP11C	0.104422	turquoise	turquoise
THAP9	ATP13A3	0.084486	turquoise	turquoise
THAP9	ATP1A4	0.090448	turquoise	turquoise
THAP9	ATP2B1	0.153068	turquoise	turquoise
THAP9	ATP2B1.AS1	0.150262	turquoise	NA
THAP9	ATP2C1	0.194136	turquoise	turquoise
THAP9	ATP5MF.PTCD1	0.075757	turquoise	NA
THAP9	ATP6V0A1	0.123603	turquoise	turquoise
THAP9	ATP6V0A2	0.152026	turquoise	turquoise
THAP9	ATP6V1A	0.216239	turquoise	turquoise
THAP9	ATP6V1C1	0.115096	turquoise	turquoise
THAP9	ATP6V1E2	0.121025	turquoise	turquoise
THAP9	ATP8A2P2	0.146088	turquoise	turquoise
THAP9	ATP9B	0.16595	turquoise	turquoise
THAP9	ATR	0.256686	turquoise	turquoise
THAP9	ATRN	0.23531	turquoise	turquoise
THAP9	ATRX	0.270488	turquoise	turquoise
THAP9	ATXN1	0.126514	turquoise	turquoise
THAP9	ATXN1L	0.07995	turquoise	turquoise
THAP9	ATXN2	0.10603	turquoise	turquoise
THAP9	ATXN3	0.197967	turquoise	turquoise
THAP9	ATXN7	0.305232	turquoise	turquoise
THAP9	ATXN7L1	0.17489	turquoise	turquoise
THAP9	ATXN7L3B	0.167491	turquoise	turquoise
THAP9	AUH	0.107013	turquoise	turquoise
THAP9	AVL9	0.250337	turquoise	turquoise
THAP9	AXIN2	0.070227	turquoise	turquoise
THAP9	AZIN1	0.147638	turquoise	turquoise
THAP9	B3GALNT1	0.145649	turquoise	turquoise
THAP9	B3GALT2	0.116742	turquoise	turquoise
THAP9	B3GAT2	0.162753	turquoise	turquoise
THAP9	B3GLCT	0.140474	turquoise	turquoise
THAP9	B3GNT2	0.155423	turquoise	turquoise
THAP9	B4GALT1	0.151922	turquoise	turquoise
THAP9	BACE1	0.080764	turquoise	turquoise
THAP9	BACE2	0.123829	turquoise	turquoise
THAP9	BACH1	0.243548	turquoise	turquoise
THAP9	BACH2	0.15817	turquoise	turquoise
THAP9	BAG4	0.073351	turquoise	turquoise
THAP9	BAG5	0.144364	turquoise	turquoise
THAP9	BARD1	0.173713	turquoise	turquoise
THAP9	BAZ1A	0.226764	turquoise	turquoise
THAP9	BAZ1B	0.12831	turquoise	turquoise
THAP9	BAZ2A	0.162747	turquoise	turquoise
THAP9	BAZ2B	0.270342	turquoise	turquoise
THAP9	BBIP1	0.269151	turquoise	turquoise
THAP9	BBS10	0.121859	turquoise	turquoise
THAP9	BBS12	0.124762	turquoise	turquoise
THAP9	BBS2	0.17744	turquoise	turquoise
THAP9	BBS4	0.175524	turquoise	turquoise
THAP9	BBS7	0.185827	turquoise	turquoise
THAP9	BBS9	0.160999	turquoise	turquoise
THAP9	BBX	0.279788	turquoise	turquoise
THAP9	BCAR3	0.055768	turquoise	turquoise
THAP9	BCAS3	0.102671	turquoise	turquoise
THAP9	BCDIN3D	0.126757	turquoise	turquoise
THAP9	BCDIN3D.AS1	0.102764	turquoise	NA
THAP9	BCKDHB	0.077051	turquoise	turquoise
THAP9	BCL10	0.137058	turquoise	turquoise
THAP9	BCL2	0.101525	turquoise	turquoise
THAP9	BCL2L15	0.142352	turquoise	turquoise
THAP9	BCL9L	0.064456	turquoise	turquoise
THAP9	BCLAF1	0.348448	turquoise	turquoise
THAP9	BCLAF3	0.319288	turquoise	turquoise
THAP9	BCOR	0.16221	turquoise	turquoise
THAP9	BCORL1	0.111365	turquoise	turquoise
THAP9	BDH2	0.13433	turquoise	turquoise
THAP9	BDNF	0.13333	turquoise	turquoise
THAP9	BDNF.AS	0.171715	turquoise	NA
THAP9	BDP1	0.239412	turquoise	turquoise
THAP9	BEND7	0.209806	turquoise	turquoise
THAP9	BET1	0.13321	turquoise	turquoise
THAP9	BET1L	0.111324	turquoise	turquoise
THAP9	BFAR	0.099923	turquoise	turquoise
THAP9	BHLHB9	0.194047	turquoise	turquoise
THAP9	BHLHE40	0.130492	turquoise	turquoise
THAP9	BHLHE40.AS1	0.13017	turquoise	NA
THAP9	BICD1	0.155477	turquoise	turquoise
THAP9	BICRAL	0.292893	turquoise	turquoise
THAP9	BIRC2	0.306533	turquoise	turquoise
THAP9	BIRC6	0.267654	turquoise	turquoise
THAP9	BIVM	0.163983	turquoise	turquoise
THAP9	BLOC1S5	0.221669	turquoise	turquoise
THAP9	BLOC1S6	0.166393	turquoise	turquoise
THAP9	BLZF1	0.226592	turquoise	turquoise
THAP9	BMF	0.075734	turquoise	turquoise
THAP9	BMI1	0.171753	turquoise	turquoise
THAP9	BMPR1A	0.173283	turquoise	turquoise
THAP9	BMPR1AP1	0.073764	turquoise	turquoise
THAP9	BMPR2	0.125057	turquoise	turquoise
THAP9	BMS1	0.13284	turquoise	turquoise
THAP9	BMT2	0.20486	turquoise	turquoise
THAP9	BNIP3P16	0.148364	turquoise	turquoise
THAP9	BNIP3P24	0.162819	turquoise	turquoise
THAP9	BNIP3P39	0.129307	turquoise	turquoise
THAP9	BNIP3P40	0.097881	turquoise	turquoise
THAP9	BOD1L1	0.215024	turquoise	turquoise
THAP9	BOLA2.SMG1P6	0.105535	turquoise	NA
THAP9	BOLA3.AS1	0.122586	turquoise	NA
THAP9	BORA	0.129197	turquoise	turquoise
THAP9	BPNT1	0.199155	turquoise	turquoise
THAP9	BPTF	0.283351	turquoise	turquoise
THAP9	BRAF	0.25218	turquoise	turquoise
THAP9	BRAP	0.151715	turquoise	turquoise
THAP9	BRCC3	0.170851	turquoise	turquoise
THAP9	BRCC3P1	0.114851	turquoise	turquoise
THAP9	BRD3	0.125656	turquoise	turquoise
THAP9	BRIX1	0.142591	turquoise	turquoise
THAP9	BRMS1L	0.132623	turquoise	turquoise
THAP9	BROX	0.227742	turquoise	turquoise
THAP9	BRPF3	0.173694	turquoise	turquoise
THAP9	BRWD1	0.254022	turquoise	turquoise
THAP9	BRWD3	0.234345	turquoise	turquoise
THAP9	BSDC1	0.109518	turquoise	turquoise
THAP9	BTBD10	0.14199	turquoise	turquoise
THAP9	BTBD18	0.143248	turquoise	turquoise
THAP9	BTBD3	0.238409	turquoise	turquoise
THAP9	BTBD7	0.230112	turquoise	turquoise
THAP9	BTBD8	0.089329	turquoise	turquoise
THAP9	BTBD9	0.133439	turquoise	turquoise
THAP9	BTC	0.136523	turquoise	turquoise
THAP9	BTF3L4	0.164564	turquoise	turquoise
THAP9	BTG1	0.106377	turquoise	turquoise
THAP9	BTG3	0.129437	turquoise	turquoise
THAP9	BTN2A3P	0.160349	turquoise	turquoise
THAP9	BUB3	0.190891	turquoise	turquoise
THAP9	BUD13	0.125021	turquoise	turquoise
THAP9	C10orf88	0.201339	turquoise	turquoise
THAP9	C11orf54	0.155226	turquoise	turquoise
THAP9	C11orf58	0.242659	turquoise	turquoise
THAP9	C11orf65	0.147073	turquoise	turquoise
THAP9	C11orf71	0.137392	turquoise	turquoise
THAP9	C12orf29	0.235343	turquoise	turquoise
THAP9	C12orf4	0.198482	turquoise	turquoise
THAP9	C12orf66	0.278758	turquoise	turquoise
THAP9	C12orf71	0.151393	turquoise	turquoise
THAP9	C12orf73	0.150176	turquoise	turquoise
THAP9	C12orf76	0.132924	turquoise	turquoise
THAP9	C14orf28	0.081716	turquoise	turquoise
THAP9	C15orf40	0.121709	turquoise	turquoise
THAP9	C16orf70	0.175511	turquoise	turquoise
THAP9	C16orf72	0.180663	turquoise	turquoise
THAP9	C17orf75	0.233463	turquoise	turquoise
THAP9	C17orf80	0.248409	turquoise	turquoise
THAP9	C18orf25	0.236029	turquoise	turquoise
THAP9	C18orf32	0.128369	turquoise	turquoise
THAP9	C18orf54	0.111656	turquoise	turquoise
THAP9	C19orf54	0.108271	turquoise	turquoise
THAP9	C1GALT1	0.11812	turquoise	turquoise
THAP9	C1orf109	0.145354	turquoise	turquoise
THAP9	C1orf112	0.277289	turquoise	turquoise
THAP9	C1orf131	0.120028	turquoise	turquoise
THAP9	C1orf189	0.051209	turquoise	turquoise
THAP9	C1orf21	0.129283	turquoise	turquoise
THAP9	C1orf52	0.154028	turquoise	turquoise
THAP9	C1QL3	0.127483	turquoise	turquoise
THAP9	C1QTNF7.AS1	0.026875	turquoise	NA
THAP9	C21orf62	0.120581	turquoise	turquoise
THAP9	C21orf91	0.143956	turquoise	turquoise
THAP9	C22orf24	0.105914	turquoise	turquoise
THAP9	C2CD3	0.202657	turquoise	turquoise
THAP9	C2CD5	0.299512	turquoise	turquoise
THAP9	C2orf16	0.135802	turquoise	turquoise
THAP9	C2orf42	0.121357	turquoise	turquoise
THAP9	C2orf49	0.207941	turquoise	turquoise
THAP9	C2orf66	0.088368	turquoise	turquoise
THAP9	C2orf68	0.141651	turquoise	turquoise
THAP9	C2orf69	0.114283	turquoise	turquoise
THAP9	C3orf33	0.160699	turquoise	turquoise
THAP9	C3orf49	0.170786	turquoise	turquoise
THAP9	C4orf33	0.131318	turquoise	turquoise
THAP9	C4orf36	0.206196	turquoise	turquoise
THAP9	C4orf46	0.222912	turquoise	turquoise
THAP9	C5	0.106842	turquoise	turquoise
THAP9	C5orf15	0.193012	turquoise	turquoise
THAP9	C5orf22	0.257236	turquoise	turquoise
THAP9	C5orf24	0.232925	turquoise	turquoise
THAP9	C5orf34	0.179237	turquoise	turquoise
THAP9	C5orf51	0.295659	turquoise	turquoise
THAP9	C5orf63	0.15186	turquoise	turquoise
THAP9	C6orf120	0.068742	turquoise	turquoise
THAP9	C6orf62	0.106711	turquoise	turquoise
THAP9	C6orf89	0.082346	turquoise	turquoise
THAP9	C7orf25	0.096422	turquoise	turquoise
THAP9	C7orf31	0.107769	turquoise	turquoise
THAP9	C8orf37	0.193769	turquoise	turquoise
THAP9	C8orf88	0.141596	turquoise	turquoise
THAP9	C9orf72	0.128734	turquoise	turquoise
THAP9	C9orf85	0.12897	turquoise	turquoise
THAP9	CA13	0.164074	turquoise	turquoise
THAP9	CA5B	0.111522	turquoise	turquoise
THAP9	CA5BP1	0.142105	turquoise	turquoise
THAP9	CAAP1	0.197733	turquoise	turquoise
THAP9	CAB39L	0.105819	turquoise	turquoise
THAP9	CACHD1	0.104137	turquoise	turquoise
THAP9	CACNB2	0.129424	turquoise	turquoise
THAP9	CACUL1	0.23043	turquoise	turquoise
THAP9	CAMK2D	0.125983	turquoise	turquoise
THAP9	CAMSAP1	0.13127	turquoise	turquoise
THAP9	CAMSAP2	0.202542	turquoise	turquoise
THAP9	CAMTA1	0.14905	turquoise	turquoise
THAP9	CAMTA2	0.052838	turquoise	turquoise
THAP9	CANX	0.222768	turquoise	turquoise
THAP9	CAP1P1	0.06821	turquoise	turquoise
THAP9	CAPN7	0.296019	turquoise	turquoise
THAP9	CAPNS1P1	0.065071	turquoise	turquoise
THAP9	CAPRIN1	0.238183	turquoise	turquoise
THAP9	CAPRIN2	0.106474	turquoise	turquoise
THAP9	CAPS2	0.222186	turquoise	turquoise
THAP9	CARNMT1	0.254575	turquoise	turquoise
THAP9	CASC2	0.137505	turquoise	turquoise
THAP9	CASC3	0.156891	turquoise	turquoise
THAP9	CASD1	0.153638	turquoise	turquoise
THAP9	CASK	0.163842	turquoise	turquoise
THAP9	CASP3	0.126866	turquoise	turquoise
THAP9	CASP8	0.117973	turquoise	turquoise
THAP9	CASP8AP2	0.294696	turquoise	turquoise
THAP9	CATSPER2P1	0.083927	turquoise	turquoise
THAP9	CATSPERE	0.172913	turquoise	turquoise
THAP9	CBFA2T2	0.196406	turquoise	turquoise
THAP9	CBFB	0.198309	turquoise	turquoise
THAP9	CBL	0.094788	turquoise	turquoise
THAP9	CBLB	0.096819	turquoise	turquoise
THAP9	CBLL1	0.15566	turquoise	turquoise
THAP9	CBR4	0.310741	turquoise	turquoise
THAP9	CBWD1	0.144125	turquoise	turquoise
THAP9	CBWD2	0.191593	turquoise	turquoise
THAP9	CBX1	0.125615	turquoise	turquoise
THAP9	CBX3	0.199939	turquoise	turquoise
THAP9	CBX3P2	0.164441	turquoise	turquoise
THAP9	CBX5	0.23962	turquoise	turquoise
THAP9	CC2D1B	0.08033	turquoise	turquoise
THAP9	CC2D2A	0.108277	turquoise	turquoise
THAP9	CC2D2B	0.156547	turquoise	turquoise
THAP9	CCAR1	0.276179	turquoise	turquoise
THAP9	CCDC112	0.190159	turquoise	turquoise
THAP9	CCDC113	0.138918	turquoise	turquoise
THAP9	CCDC117	0.123517	turquoise	turquoise
THAP9	CCDC121	0.115673	turquoise	turquoise
THAP9	CCDC122	0.166173	turquoise	turquoise
THAP9	CCDC126	0.144353	turquoise	turquoise
THAP9	CCDC13.AS1	0.125802	turquoise	NA
THAP9	CCDC146	0.103269	turquoise	turquoise
THAP9	CCDC158	0.119061	turquoise	turquoise
THAP9	CCDC17	0.050103	turquoise	turquoise
THAP9	CCDC170	0.084925	turquoise	turquoise
THAP9	CCDC173	0.130018	turquoise	turquoise
THAP9	CCDC174	0.129899	turquoise	turquoise
THAP9	CCDC18	0.084686	turquoise	turquoise
THAP9	CCDC186	0.256349	turquoise	turquoise
THAP9	CCDC192	0.163944	turquoise	turquoise
THAP9	CCDC25	0.19042	turquoise	turquoise
THAP9	CCDC28A.AS1	0.164137	turquoise	NA
THAP9	CCDC32	0.095344	turquoise	turquoise
THAP9	CCDC47	0.198335	turquoise	turquoise
THAP9	CCDC59	0.132659	turquoise	turquoise
THAP9	CCDC6	0.15223	turquoise	turquoise
THAP9	CCDC62	0.155011	turquoise	turquoise
THAP9	CCDC65	0.148651	turquoise	turquoise
THAP9	CCDC66	0.180428	turquoise	turquoise
THAP9	CCDC7	0.161331	turquoise	turquoise
THAP9	CCDC77	0.122402	turquoise	turquoise
THAP9	CCDC82	0.090741	turquoise	turquoise
THAP9	CCDC91	0.207883	turquoise	turquoise
THAP9	CCDC93	0.138366	turquoise	turquoise
THAP9	CCN2	0.076696	turquoise	turquoise
THAP9	CCNB3	0.057978	turquoise	turquoise
THAP9	CCNC	0.14876	turquoise	turquoise
THAP9	CCNG1	0.126281	turquoise	turquoise
THAP9	CCNG2	0.141716	turquoise	turquoise
THAP9	CCNI	0.139809	turquoise	turquoise
THAP9	CCNJ	0.247568	turquoise	turquoise
THAP9	CCNK	0.242766	turquoise	turquoise
THAP9	CCNL1	0.16342	turquoise	turquoise
THAP9	CCNT1	0.351801	turquoise	turquoise
THAP9	CCNT2	0.312193	turquoise	turquoise
THAP9	CCNYL2	0.117479	turquoise	turquoise
THAP9	CCNYL6	0.165138	turquoise	turquoise
THAP9	CCP110	0.298969	turquoise	turquoise
THAP9	CCSAP	0.203393	turquoise	turquoise
THAP9	CCSER2	0.114784	turquoise	turquoise
THAP9	CCT6B	0.151637	turquoise	turquoise
THAP9	CCZ1B	0.114041	turquoise	turquoise
THAP9	CD160	0.145486	turquoise	turquoise
THAP9	CD164	0.073484	turquoise	turquoise
THAP9	CD200	0.134022	turquoise	turquoise
THAP9	CD274	0.151334	turquoise	turquoise
THAP9	CD2AP	0.317475	turquoise	turquoise
THAP9	CD46	0.172487	turquoise	turquoise
THAP9	CD47	0.211273	turquoise	turquoise
THAP9	CD99P1	0.11228	turquoise	turquoise
THAP9	CDADC1	0.075461	turquoise	turquoise
THAP9	CDC16	0.104472	turquoise	turquoise
THAP9	CDC23	0.34102	turquoise	turquoise
THAP9	CDC27	0.093239	turquoise	turquoise
THAP9	CDC40	0.322365	turquoise	turquoise
THAP9	CDC42EP3	0.143161	turquoise	turquoise
THAP9	CDC42SE1	0.148964	turquoise	turquoise
THAP9	CDC42SE2	0.210277	turquoise	turquoise
THAP9	CDC5L	0.319805	turquoise	turquoise
THAP9	CDC73	0.167639	turquoise	turquoise
THAP9	CDIN1	0.172628	turquoise	turquoise
THAP9	CDK12	0.263786	turquoise	turquoise
THAP9	CDK13	0.370493	turquoise	turquoise
THAP9	CDK14	0.143068	turquoise	turquoise
THAP9	CDK17	0.25442	turquoise	turquoise
THAP9	CDK19	0.217707	turquoise	turquoise
THAP9	CDK2	0.146854	turquoise	turquoise
THAP9	CDK5RAP1	0.134818	turquoise	turquoise
THAP9	CDK6	0.15142	turquoise	turquoise
THAP9	CDK7	0.152431	turquoise	turquoise
THAP9	CDKAL1	0.205722	turquoise	turquoise
THAP9	CDKL3	0.135562	turquoise	turquoise
THAP9	CDKL5	0.181241	turquoise	turquoise
THAP9	CDKN1B	0.130117	turquoise	turquoise
THAP9	CDKN2AIP	0.228698	turquoise	turquoise
THAP9	CDKN2B.AS1	0.115106	turquoise	NA
THAP9	CDR2	0.109761	turquoise	turquoise
THAP9	CDS2	0.085435	turquoise	turquoise
THAP9	CDYL	0.226676	turquoise	turquoise
THAP9	CEBPZ	0.22077	turquoise	turquoise
THAP9	CEBPZOS	0.135445	turquoise	turquoise
THAP9	CELF1	0.241616	turquoise	turquoise
THAP9	CELF4	0.127066	turquoise	turquoise
THAP9	CEMIP2	0.082165	turquoise	turquoise
THAP9	CENPC	0.322197	turquoise	turquoise
THAP9	CENPCP1	0.152707	turquoise	turquoise
THAP9	CENPH	0.150305	turquoise	turquoise
THAP9	CENPJ	0.207774	turquoise	turquoise
THAP9	CENPL	0.140814	turquoise	turquoise
THAP9	CENPP	0.129223	turquoise	turquoise
THAP9	CENPQ	0.130335	turquoise	turquoise
THAP9	CEP104	0.107421	turquoise	turquoise
THAP9	CEP120	0.245947	turquoise	turquoise
THAP9	CEP135	0.27301	turquoise	turquoise
THAP9	CEP152	0.101055	turquoise	turquoise
THAP9	CEP162	0.245994	turquoise	turquoise
THAP9	CEP170	0.123225	turquoise	turquoise
THAP9	CEP19	0.06767	turquoise	turquoise
THAP9	CEP192	0.228721	turquoise	turquoise
THAP9	CEP20	0.160319	turquoise	turquoise
THAP9	CEP290	0.22882	turquoise	turquoise
THAP9	CEP295	0.196221	turquoise	turquoise
THAP9	CEP350	0.196732	turquoise	turquoise
THAP9	CEP41	0.127899	turquoise	turquoise
THAP9	CEP44	0.331164	turquoise	turquoise
THAP9	CEP57	0.279685	turquoise	turquoise
THAP9	CEP57L1	0.087441	turquoise	turquoise
THAP9	CEP63	0.092514	turquoise	turquoise
THAP9	CEP68	0.096056	turquoise	turquoise
THAP9	CEP76	0.262197	turquoise	turquoise
THAP9	CEP78	0.315201	turquoise	turquoise
THAP9	CEP83	0.269393	turquoise	turquoise
THAP9	CEP85L	0.150848	turquoise	turquoise
THAP9	CEP97	0.276597	turquoise	turquoise
THAP9	CEPT1	0.089356	turquoise	turquoise
THAP9	CES2	0.04998	turquoise	turquoise
THAP9	CFAP206	0.155076	turquoise	turquoise
THAP9	CFAP251	0.123971	turquoise	turquoise
THAP9	CFAP44.AS1	0.140899	turquoise	NA
THAP9	CFAP54	0.157306	turquoise	turquoise
THAP9	CFAP58	0.074847	turquoise	turquoise
THAP9	CFAP69	0.148451	turquoise	turquoise
THAP9	CFAP97	0.326345	turquoise	turquoise
THAP9	CGGBP1	0.256888	turquoise	turquoise
THAP9	CHAMP1	0.24687	turquoise	turquoise
THAP9	CHD1	0.182177	turquoise	turquoise
THAP9	CHD4	0.12177	turquoise	turquoise
THAP9	CHD6	0.19032	turquoise	turquoise
THAP9	CHD7	0.168548	turquoise	turquoise
THAP9	CHD8	0.216441	turquoise	turquoise
THAP9	CHD9	0.234272	turquoise	turquoise
THAP9	CHIC1	0.23557	turquoise	turquoise
THAP9	CHIC2	0.126829	turquoise	turquoise
THAP9	CHL1.AS1	0.063218	turquoise	NA
THAP9	CHM	0.208645	turquoise	turquoise
THAP9	CHML	0.234007	turquoise	turquoise
THAP9	CHMP1B	0.133311	turquoise	turquoise
THAP9	CHMP2B	0.138124	turquoise	turquoise
THAP9	CHMP4A	0.118685	turquoise	turquoise
THAP9	CHODL	0.042329	turquoise	turquoise
THAP9	CHORDC1	0.171239	turquoise	turquoise
THAP9	CHP1P2	0.106256	turquoise	turquoise
THAP9	CHROMR	0.126527	turquoise	turquoise
THAP9	CHST15	0.112273	turquoise	turquoise
THAP9	CHSY1	0.154121	turquoise	turquoise
THAP9	CHTOP	0.152711	turquoise	turquoise
THAP9	CHUK	0.145024	turquoise	turquoise
THAP9	CIAO1	0.128709	turquoise	turquoise
THAP9	CIART	0.12999	turquoise	turquoise
THAP9	CILK1	0.202509	turquoise	turquoise
THAP9	CKAP5	0.163545	turquoise	turquoise
THAP9	CLASP1	0.102611	turquoise	turquoise
THAP9	CLASP2	0.157163	turquoise	turquoise
THAP9	CLCC1	0.097969	turquoise	turquoise
THAP9	CLCN3	0.300368	turquoise	turquoise
THAP9	CLCN6	0.084053	turquoise	turquoise
THAP9	CLDND1	0.112387	turquoise	turquoise
THAP9	CLIC6	0.096568	turquoise	turquoise
THAP9	CLINT1	0.173267	turquoise	turquoise
THAP9	CLK1	0.153319	turquoise	turquoise
THAP9	CLMN	0.12355	turquoise	turquoise
THAP9	CLOCK	0.1448	turquoise	turquoise
THAP9	CLPB	0.062787	turquoise	turquoise
THAP9	CLPX	0.235146	turquoise	turquoise
THAP9	CLTC	0.08588	turquoise	turquoise
THAP9	CLTRN	0.153835	turquoise	turquoise
THAP9	CLUAP1	0.1083	turquoise	turquoise
THAP9	CMAHP	0.118132	turquoise	turquoise
THAP9	CMAS	0.141399	turquoise	turquoise
THAP9	CMPK1	0.09732	turquoise	turquoise
THAP9	CMTM1	0.109386	turquoise	turquoise
THAP9	CMTM6	0.168367	turquoise	turquoise
THAP9	CMTR1	0.104428	turquoise	turquoise
THAP9	CMTR2	0.239238	turquoise	turquoise
THAP9	CNKSR3	0.143796	turquoise	turquoise
THAP9	CNNM2	0.133576	turquoise	turquoise
THAP9	CNNM3.DT	0.156156	turquoise	NA
THAP9	CNOT1	0.232203	turquoise	turquoise
THAP9	CNOT10	0.229518	turquoise	turquoise
THAP9	CNOT4	0.156433	turquoise	turquoise
THAP9	CNOT6	0.288777	turquoise	turquoise
THAP9	CNOT6L	0.326417	turquoise	turquoise
THAP9	CNOT7	0.300885	turquoise	turquoise
THAP9	CNOT8	0.154145	turquoise	turquoise
THAP9	CNOT9	0.201709	turquoise	turquoise
THAP9	CNST	0.178865	turquoise	turquoise
THAP9	CNTLN	0.108947	turquoise	turquoise
THAP9	CNTN3	0.088558	turquoise	turquoise
THAP9	CNTNAP3	0.15499	turquoise	turquoise
THAP9	CNTRL	0.147069	turquoise	turquoise
THAP9	COA1	0.193752	turquoise	turquoise
THAP9	COA7	0.147782	turquoise	turquoise
THAP9	COG1	0.109022	turquoise	turquoise
THAP9	COG2	0.206133	turquoise	turquoise
THAP9	COG3	0.212916	turquoise	turquoise
THAP9	COG5	0.242843	turquoise	turquoise
THAP9	COG6	0.30008	turquoise	turquoise
THAP9	COIL	0.328634	turquoise	turquoise
THAP9	COLCA2	0.116959	turquoise	turquoise
THAP9	COLEC10	0.060987	turquoise	turquoise
THAP9	COMMD10	0.109512	turquoise	turquoise
THAP9	COMMD2	0.25763	turquoise	turquoise
THAP9	COPA	0.094545	turquoise	turquoise
THAP9	COPB1	0.228963	turquoise	turquoise
THAP9	COPB2	0.101905	turquoise	turquoise
THAP9	COPG2	0.107026	turquoise	turquoise
THAP9	COPS2	0.122877	turquoise	turquoise
THAP9	COPS7B	0.123295	turquoise	turquoise
THAP9	COQ6	0.12973	turquoise	turquoise
THAP9	COQ7	0.170213	turquoise	turquoise
THAP9	COX11	0.180852	turquoise	turquoise
THAP9	COX15	0.149142	turquoise	turquoise
THAP9	COX18	0.127408	turquoise	turquoise
THAP9	CPD	0.126223	turquoise	turquoise
THAP9	CPEB2	0.122338	turquoise	turquoise
THAP9	CPEB4	0.146679	turquoise	turquoise
THAP9	CPLANE1	0.228907	turquoise	turquoise
THAP9	CPNE3	0.176779	turquoise	turquoise
THAP9	CPOX	0.147079	turquoise	turquoise
THAP9	CPS1	0.050223	turquoise	turquoise
THAP9	CPSF2	0.177298	turquoise	turquoise
THAP9	CPSF7	0.247198	turquoise	turquoise
THAP9	CRB1	0.129974	turquoise	turquoise
THAP9	CRBN	0.178249	turquoise	turquoise
THAP9	CRCP	0.200423	turquoise	turquoise
THAP9	CREB1	0.315347	turquoise	turquoise
THAP9	CREB3L2	0.121859	turquoise	turquoise
THAP9	CREBBP	0.139649	turquoise	turquoise
THAP9	CREBRF	0.138252	turquoise	turquoise
THAP9	CRIM1	0.075918	turquoise	turquoise
THAP9	CRKL	0.169149	turquoise	turquoise
THAP9	CRLF3	0.183061	turquoise	turquoise
THAP9	CRNKL1	0.242609	turquoise	turquoise
THAP9	CRPPA	0.161097	turquoise	turquoise
THAP9	CRTC2	0.114182	turquoise	turquoise
THAP9	CRY1	0.130703	turquoise	turquoise
THAP9	CRYBG1	0.136974	turquoise	turquoise
THAP9	CRYZ	0.133457	turquoise	turquoise
THAP9	CRYZL1	0.098747	turquoise	turquoise
THAP9	CRYZL2P	0.108951	turquoise	turquoise
THAP9	CSE1L	0.239361	turquoise	turquoise
THAP9	CSGALNACT2	0.102946	turquoise	turquoise
THAP9	CSNK1A1	0.147284	turquoise	turquoise
THAP9	CSNK1G1	0.259769	turquoise	turquoise
THAP9	CSNK1G3	0.323342	turquoise	turquoise
THAP9	CSNK2A1	0.209941	turquoise	turquoise
THAP9	CSNK2A2	0.070324	turquoise	turquoise
THAP9	CSNK2A3	0.144753	turquoise	turquoise
THAP9	CSTF1	0.133698	turquoise	turquoise
THAP9	CSTF2T	0.112038	turquoise	turquoise
THAP9	CSTF3	0.1911	turquoise	turquoise
THAP9	CT66	0.052112	turquoise	turquoise
THAP9	CTBS	0.142126	turquoise	turquoise
THAP9	CTCF	0.215112	turquoise	turquoise
THAP9	CTDSP2	0.081099	turquoise	turquoise
THAP9	CTDSPL	0.144339	turquoise	turquoise
THAP9	CTDSPL2	0.377552	turquoise	turquoise
THAP9	CTNNB1	0.146719	turquoise	turquoise
THAP9	CTNND1	0.198083	turquoise	turquoise
THAP9	CTR9	0.287184	turquoise	turquoise
THAP9	CTSO	0.15695	turquoise	turquoise
THAP9	CTTNBP2	0.073201	turquoise	turquoise
THAP9	CTTNBP2NL	0.12081	turquoise	turquoise
THAP9	CUL1	0.132283	turquoise	turquoise
THAP9	CUL2	0.11575	turquoise	turquoise
THAP9	CUL3	0.279448	turquoise	turquoise
THAP9	CUL4B	0.299411	turquoise	turquoise
THAP9	CUL5	0.164559	turquoise	turquoise
THAP9	CWC22	0.26163	turquoise	turquoise
THAP9	CWC25	0.122155	turquoise	turquoise
THAP9	CWF19L1	0.147273	turquoise	turquoise
THAP9	CWF19L2	0.124774	turquoise	turquoise
THAP9	CXADR	0.158812	turquoise	turquoise
THAP9	CXorf38	0.149223	turquoise	turquoise
THAP9	CXorf56	0.1144	turquoise	turquoise
THAP9	CXorf58	0.164903	turquoise	turquoise
THAP9	CXXC4	0.168594	turquoise	turquoise
THAP9	CYB561D1	0.063543	turquoise	turquoise
THAP9	CYB5R4	0.114658	turquoise	turquoise
THAP9	CYFIP1	0.095558	turquoise	turquoise
THAP9	CYLD	0.251015	turquoise	turquoise
THAP9	CYP20A1	0.19402	turquoise	turquoise
THAP9	CYP4V2	0.130941	turquoise	turquoise
THAP9	CYP7A1	0.097115	turquoise	turquoise
THAP9	CYP7B1	0.141154	turquoise	turquoise
THAP9	DAAM1	0.102413	turquoise	turquoise
THAP9	DAB1	0.041844	turquoise	turquoise
THAP9	DARS1	0.180884	turquoise	turquoise
THAP9	DARS2	0.096236	turquoise	turquoise
THAP9	DBF4	0.213918	turquoise	turquoise
THAP9	DBIL5P	0.033964	turquoise	turquoise
THAP9	DBR1	0.202554	turquoise	turquoise
THAP9	DBT	0.108648	turquoise	turquoise
THAP9	DCAF1	0.191887	turquoise	turquoise
THAP9	DCAF12	0.244798	turquoise	turquoise
THAP9	DCAF13	0.137858	turquoise	turquoise
THAP9	DCAF16	0.24736	turquoise	turquoise
THAP9	DCAF17	0.348059	turquoise	turquoise
THAP9	DCAF4L1	0.07974	turquoise	turquoise
THAP9	DCAF5	0.085634	turquoise	turquoise
THAP9	DCAF7	0.165888	turquoise	turquoise
THAP9	DCAF8	0.147594	turquoise	turquoise
THAP9	DCBLD2	0.07941	turquoise	turquoise
THAP9	DCK	0.128259	turquoise	turquoise
THAP9	DCLK2	0.107856	turquoise	turquoise
THAP9	DCLRE1A	0.253104	turquoise	turquoise
THAP9	DCLRE1B	0.099083	turquoise	turquoise
THAP9	DCLRE1C	0.233546	turquoise	turquoise
THAP9	DCP1A	0.260882	turquoise	turquoise
THAP9	DCP1B	0.135869	turquoise	turquoise
THAP9	DCP2	0.155149	turquoise	turquoise
THAP9	DCTN1.AS1	0.089337	turquoise	NA
THAP9	DCTN4	0.213907	turquoise	turquoise
THAP9	DCTN5	0.166679	turquoise	turquoise
THAP9	DCUN1D1	0.249549	turquoise	turquoise
THAP9	DCUN1D4	0.146602	turquoise	turquoise
THAP9	DDAH1	0.169587	turquoise	turquoise
THAP9	DDB1	0.087481	turquoise	turquoise
THAP9	DDHD1	0.057804	turquoise	turquoise
THAP9	DDI2	0.154499	turquoise	turquoise
THAP9	DDIT3	0.080816	turquoise	turquoise
THAP9	DDO	0.098301	turquoise	turquoise
THAP9	DDX10	0.142217	turquoise	turquoise
THAP9	DDX18	0.31168	turquoise	turquoise
THAP9	DDX18P1	0.140849	turquoise	turquoise
THAP9	DDX20	0.275464	turquoise	turquoise
THAP9	DDX21	0.164047	turquoise	turquoise
THAP9	DDX24	0.074987	turquoise	turquoise
THAP9	DDX3X	0.139321	turquoise	turquoise
THAP9	DDX42	0.106922	turquoise	turquoise
THAP9	DDX46	0.293054	turquoise	turquoise
THAP9	DDX5	0.135933	turquoise	turquoise
THAP9	DDX50	0.182954	turquoise	turquoise
THAP9	DDX52	0.347915	turquoise	turquoise
THAP9	DDX59	0.214061	turquoise	turquoise
THAP9	DDX6	0.219874	turquoise	turquoise
THAP9	DEK	0.200307	turquoise	turquoise
THAP9	DELE1	0.126365	turquoise	turquoise
THAP9	DENND11	0.23789	turquoise	turquoise
THAP9	DENND1B	0.172365	turquoise	turquoise
THAP9	DENND2D	0.118959	turquoise	turquoise
THAP9	DENND4A	0.26185	turquoise	turquoise
THAP9	DENND4C	0.198711	turquoise	turquoise
THAP9	DENND5B	0.078705	turquoise	turquoise
THAP9	DENND6A	0.247142	turquoise	turquoise
THAP9	DENR	0.245531	turquoise	turquoise
THAP9	DEPDC4	0.171478	turquoise	turquoise
THAP9	DESI1	0.115554	turquoise	turquoise
THAP9	DET1	0.168595	turquoise	turquoise
THAP9	DFFA	0.137714	turquoise	turquoise
THAP9	DGKE	0.150498	turquoise	turquoise
THAP9	DGKH	0.146775	turquoise	turquoise
THAP9	DHFR2	0.193255	turquoise	turquoise
THAP9	DHRS4.AS1	0.127114	turquoise	NA
THAP9	DHTKD1	0.108245	turquoise	turquoise
THAP9	DHX15	0.300684	turquoise	turquoise
THAP9	DHX29	0.272686	turquoise	turquoise
THAP9	DHX32	0.185639	turquoise	turquoise
THAP9	DHX33	0.257863	turquoise	turquoise
THAP9	DHX35	0.180871	turquoise	turquoise
THAP9	DHX36	0.355138	turquoise	turquoise
THAP9	DHX40	0.321336	turquoise	turquoise
THAP9	DHX57	0.308246	turquoise	turquoise
THAP9	DHX8	0.151125	turquoise	turquoise
THAP9	DHX9	0.265123	turquoise	turquoise
THAP9	DIABLO	0.142878	turquoise	turquoise
THAP9	DIAPH1	0.124804	turquoise	turquoise
THAP9	DICER1	0.159621	turquoise	turquoise
THAP9	DIMT1	0.20337	turquoise	turquoise
THAP9	DIP2B	0.240277	turquoise	turquoise
THAP9	DIPK2A	0.15045	turquoise	turquoise
THAP9	DIS3	0.269873	turquoise	turquoise
THAP9	DIS3L	0.060699	turquoise	turquoise
THAP9	DISC1	0.126573	turquoise	turquoise
THAP9	DIXDC1	0.058119	turquoise	turquoise
THAP9	DLEU2	0.128645	turquoise	turquoise
THAP9	DLG1	0.111142	turquoise	turquoise
THAP9	DLGAP2	0.12216	turquoise	turquoise
THAP9	DMAC2L	0.157628	turquoise	turquoise
THAP9	DMC1	0.156088	turquoise	turquoise
THAP9	DMXL1	0.160893	turquoise	turquoise
THAP9	DMXL2	0.088082	turquoise	turquoise
THAP9	DNAAF2	0.152734	turquoise	turquoise
THAP9	DNAH10	0.11642	turquoise	turquoise
THAP9	DNAI3	0.120381	turquoise	turquoise
THAP9	DNAJB14	0.220752	turquoise	turquoise
THAP9	DNAJB6P1	0.106552	turquoise	turquoise
THAP9	DNAJB9	0.130567	turquoise	turquoise
THAP9	DNAJC10	0.219748	turquoise	turquoise
THAP9	DNAJC11	0.102608	turquoise	turquoise
THAP9	DNAJC13	0.111308	turquoise	turquoise
THAP9	DNAJC16	0.295489	turquoise	turquoise
THAP9	DNAJC18	0.151162	turquoise	turquoise
THAP9	DNAJC2	0.187762	turquoise	turquoise
THAP9	DNAJC21	0.16447	turquoise	turquoise
THAP9	DNAJC24	0.142277	turquoise	turquoise
THAP9	DNAJC27	0.289215	turquoise	turquoise
THAP9	DNAJC27.AS1	0.09659	turquoise	NA
THAP9	DNAJC28	0.113681	turquoise	turquoise
THAP9	DNAJC3	0.176217	turquoise	turquoise
THAP9	DNAJC6	0.143458	turquoise	turquoise
THAP9	DNAJC9.AS1	0.129159	turquoise	NA
THAP9	DNAL1	0.135768	turquoise	turquoise
THAP9	DNM1L	0.230289	turquoise	turquoise
THAP9	DNMBP	0.127671	turquoise	turquoise
THAP9	DNMT3B	0.139124	turquoise	turquoise
THAP9	DNTTIP2	0.143721	turquoise	turquoise
THAP9	DOCK1	0.175234	turquoise	turquoise
THAP9	DOCK10	0.138296	turquoise	turquoise
THAP9	DOCK3	0.048462	turquoise	turquoise
THAP9	DOCK4	0.093076	turquoise	turquoise
THAP9	DOCK7	0.13847	turquoise	turquoise
THAP9	DOCK8	0.099596	turquoise	turquoise
THAP9	DOCK9	0.093117	turquoise	turquoise
THAP9	DOK6	0.094697	turquoise	turquoise
THAP9	DONSON	0.140904	turquoise	turquoise
THAP9	DOP1A	0.280292	turquoise	turquoise
THAP9	DPH6	0.237953	turquoise	turquoise
THAP9	DPP8	0.139305	turquoise	turquoise
THAP9	DPY19L2	0.122615	turquoise	turquoise
THAP9	DPY19L2P3	0.149383	turquoise	turquoise
THAP9	DPY19L3	0.280922	turquoise	turquoise
THAP9	DPY19L4	0.261069	turquoise	turquoise
THAP9	DR1	0.216544	turquoise	turquoise
THAP9	DROSHA	0.240987	turquoise	turquoise
THAP9	DSCAM	0.090059	turquoise	turquoise
THAP9	DSCC1	0.137558	turquoise	turquoise
THAP9	DSG2	0.216574	turquoise	turquoise
THAP9	DSG2.AS1	0.120846	turquoise	NA
THAP9	DSN1	0.129423	turquoise	turquoise
THAP9	DSTNP3	0.110395	turquoise	turquoise
THAP9	DSTYK	0.230595	turquoise	turquoise
THAP9	DTD2	0.085513	turquoise	turquoise
THAP9	DTWD1	0.175985	turquoise	turquoise
THAP9	DTWD2	0.184511	turquoise	turquoise
THAP9	DUBR	0.142812	turquoise	turquoise
THAP9	DUS4L	0.274086	turquoise	turquoise
THAP9	DUSP10	0.105246	turquoise	turquoise
THAP9	DUSP11	0.161671	turquoise	turquoise
THAP9	DUSP12	0.134362	turquoise	turquoise
THAP9	DUSP18	0.112053	turquoise	turquoise
THAP9	DUSP19	0.132867	turquoise	turquoise
THAP9	DUSP6	0.118656	turquoise	turquoise
THAP9	DUXAP1	0.060966	turquoise	turquoise
THAP9	DVL3	0.164102	turquoise	turquoise
THAP9	DYM	0.193734	turquoise	turquoise
THAP9	DYNC1H1	0.066285	turquoise	turquoise
THAP9	DYNC1I2	0.100544	turquoise	turquoise
THAP9	DYNC1I2P1	0.096844	turquoise	turquoise
THAP9	DYNC1LI1	0.147162	turquoise	turquoise
THAP9	DYNC1LI2	0.058249	turquoise	turquoise
THAP9	DYNC2H1	0.129298	turquoise	turquoise
THAP9	DYNC2I1	0.120793	turquoise	turquoise
THAP9	DYNC2LI1	0.184575	turquoise	turquoise
THAP9	DYRK1A	0.293663	turquoise	turquoise
THAP9	DYRK3	0.117765	turquoise	turquoise
THAP9	DZIP3	0.188182	turquoise	turquoise
THAP9	E2F3	0.138987	turquoise	turquoise
THAP9	EAF1	0.192682	turquoise	turquoise
THAP9	EAPP	0.133755	turquoise	turquoise
THAP9	EBLN3P	0.345919	turquoise	turquoise
THAP9	ECD	0.226925	turquoise	turquoise
THAP9	ECI2.DT	0.056407	turquoise	NA
THAP9	ECPAS	0.092254	turquoise	turquoise
THAP9	ECT2	0.14601	turquoise	turquoise
THAP9	ECT2L	0.15841	turquoise	turquoise
THAP9	EDA2R	0.137041	turquoise	turquoise
THAP9	EDEM1	0.228507	turquoise	turquoise
THAP9	EDEM3	0.157072	turquoise	turquoise
THAP9	EDIL3	0.126	turquoise	turquoise
THAP9	EDN1	0.088853	turquoise	turquoise
THAP9	EDNRA	0.116199	turquoise	turquoise
THAP9	EDRF1	0.286757	turquoise	turquoise
THAP9	EEA1	0.083629	turquoise	turquoise
THAP9	EED	0.149039	turquoise	turquoise
THAP9	EEF1AKMT2	0.223763	turquoise	turquoise
THAP9	EEF1AKMT3	0.150468	turquoise	turquoise
THAP9	EEF2K	0.109481	turquoise	turquoise
THAP9	EFCAB10	0.142998	turquoise	turquoise
THAP9	EFCAB14	0.109431	turquoise	turquoise
THAP9	EFCAB2	0.066986	turquoise	turquoise
THAP9	EFCAB7	0.229056	turquoise	turquoise
THAP9	EFHB	0.113789	turquoise	turquoise
THAP9	EFL1	0.167191	turquoise	turquoise
THAP9	EFNA5	0.120269	turquoise	turquoise
THAP9	EFNB2	0.126331	turquoise	turquoise
THAP9	EFR3A	0.149316	turquoise	turquoise
THAP9	EGFR	0.06681	turquoise	turquoise
THAP9	EIF1AD	0.12469	turquoise	turquoise
THAP9	EIF1AX	0.170473	turquoise	turquoise
THAP9	EIF1AX.AS1	0.122057	turquoise	NA
THAP9	EIF2A	0.154299	turquoise	turquoise
THAP9	EIF2AK1	0.127033	turquoise	turquoise
THAP9	EIF2AK2	0.127048	turquoise	turquoise
THAP9	EIF2AK3	0.287811	turquoise	turquoise
THAP9	EIF2AK4	0.119972	turquoise	turquoise
THAP9	EIF2AP4	0.102652	turquoise	turquoise
THAP9	EIF2S1	0.101414	turquoise	turquoise
THAP9	EIF2S3	0.151723	turquoise	turquoise
THAP9	EIF3A	0.099822	turquoise	turquoise
THAP9	EIF3EP4	0.114283	turquoise	turquoise
THAP9	EIF4A2	0.1537	turquoise	turquoise
THAP9	EIF4B	0.133467	turquoise	turquoise
THAP9	EIF4E	0.175636	turquoise	turquoise
THAP9	EIF4ENIF1	0.190417	turquoise	turquoise
THAP9	EIF4G2	0.089772	turquoise	turquoise
THAP9	EIF4G3	0.081691	turquoise	turquoise
THAP9	EIF5	0.097675	turquoise	turquoise
THAP9	ELAVL4	0.141509	turquoise	turquoise
THAP9	ELF1	0.152835	turquoise	turquoise
THAP9	ELF2	0.28708	turquoise	turquoise
THAP9	ELK1	0.112746	turquoise	turquoise
THAP9	ELK4	0.140071	turquoise	turquoise
THAP9	ELL2	0.110632	turquoise	turquoise
THAP9	ELMO2	0.106004	turquoise	turquoise
THAP9	ELMOD2	0.167817	turquoise	turquoise
THAP9	ELOA	0.072316	turquoise	turquoise
THAP9	ELOA.AS1	0.135107	turquoise	NA
THAP9	ELOVL4	0.120567	turquoise	turquoise
THAP9	ELP1	0.275632	turquoise	turquoise
THAP9	EMC1	0.132775	turquoise	turquoise
THAP9	EML4	0.172696	turquoise	turquoise
THAP9	EML6	0.168164	turquoise	turquoise
THAP9	EMSY	0.310282	turquoise	turquoise
THAP9	ENAH	0.177772	turquoise	turquoise
THAP9	ENC1	0.105467	turquoise	turquoise
THAP9	ENDOD1	0.150629	turquoise	turquoise
THAP9	ENKUR	0.144514	turquoise	turquoise
THAP9	ENOPH1	0.158524	turquoise	turquoise
THAP9	ENOX2	0.096583	turquoise	turquoise
THAP9	ENPP4	0.072338	turquoise	turquoise
THAP9	ENPP7P8	0.136386	turquoise	turquoise
THAP9	ENTPD1.AS1	0.148829	turquoise	NA
THAP9	ENTPD4	0.179161	turquoise	turquoise
THAP9	EOGT	0.132444	turquoise	turquoise
THAP9	EP300	0.198661	turquoise	turquoise
THAP9	EP400	0.137223	turquoise	turquoise
THAP9	EPB41	0.100609	turquoise	turquoise
THAP9	EPB41L4A	0.071349	turquoise	turquoise
THAP9	EPB41L5	0.216998	turquoise	turquoise
THAP9	EPC1	0.250824	turquoise	turquoise
THAP9	EPC2	0.315345	turquoise	turquoise
THAP9	EPG5	0.255457	turquoise	turquoise
THAP9	EPHA4	0.123437	turquoise	turquoise
THAP9	EPM2AIP1	0.282731	turquoise	turquoise
THAP9	EPN2.AS1	0.161969	turquoise	NA
THAP9	EPRS1	0.201806	turquoise	turquoise
THAP9	EPS15L1	0.111462	turquoise	turquoise
THAP9	EQTN	0.140996	turquoise	turquoise
THAP9	ERBIN	0.348146	turquoise	turquoise
THAP9	ERC1	0.074995	turquoise	turquoise
THAP9	ERCC3	0.156334	turquoise	turquoise
THAP9	ERCC4	0.204675	turquoise	turquoise
THAP9	ERCC5	0.088395	turquoise	turquoise
THAP9	ERCC6	0.262394	turquoise	turquoise
THAP9	ERCC6L2	0.279181	turquoise	turquoise
THAP9	ERCC8	0.093452	turquoise	turquoise
THAP9	ERGIC2	0.111314	turquoise	turquoise
THAP9	ERI1	0.100242	turquoise	turquoise
THAP9	ERI2	0.222764	turquoise	turquoise
THAP9	ERICH2	0.124316	turquoise	turquoise
THAP9	ERLIN1	0.094976	turquoise	turquoise
THAP9	ERLIN2	0.199709	turquoise	turquoise
THAP9	ERMAP	0.082344	turquoise	turquoise
THAP9	ERMARD	0.191905	turquoise	turquoise
THAP9	ERO1A	0.109234	turquoise	turquoise
THAP9	ESCO1	0.30991	turquoise	turquoise
THAP9	ESF1	0.281857	turquoise	turquoise
THAP9	ESYT2	0.077661	turquoise	turquoise
THAP9	ETAA1	0.278607	turquoise	turquoise
THAP9	ETFBKMT	0.132994	turquoise	turquoise
THAP9	ETNK1	0.278774	turquoise	turquoise
THAP9	ETV3	0.132534	turquoise	turquoise
THAP9	EVI5	0.078499	turquoise	turquoise
THAP9	EXD2	0.208175	turquoise	turquoise
THAP9	EXO5	0.127533	turquoise	turquoise
THAP9	EXOC1	0.201918	turquoise	turquoise
THAP9	EXOC2	0.128384	turquoise	turquoise
THAP9	EXOC4	0.10944	turquoise	turquoise
THAP9	EXOC5	0.07896	turquoise	turquoise
THAP9	EXOC6	0.158949	turquoise	turquoise
THAP9	EXOC7	0.084042	turquoise	turquoise
THAP9	EXOC8	0.182566	turquoise	turquoise
THAP9	EXOSC10	0.126373	turquoise	turquoise
THAP9	EXOSC3	0.135841	turquoise	turquoise
THAP9	EXOSC8	0.165663	turquoise	turquoise
THAP9	EXOSC9	0.184743	turquoise	turquoise
THAP9	EXPH5	0.171445	turquoise	turquoise
THAP9	EXTL2	0.136831	turquoise	turquoise
THAP9	EXTL3	0.088273	turquoise	turquoise
THAP9	EYA3	0.221091	turquoise	turquoise
THAP9	F11R	0.111916	turquoise	turquoise
THAP9	F2R	0.111646	turquoise	turquoise
THAP9	FAF1	0.154879	turquoise	turquoise
THAP9	FAF2	0.273464	turquoise	turquoise
THAP9	FAM102B	0.211502	turquoise	turquoise
THAP9	FAM104A	0.162053	turquoise	turquoise
THAP9	FAM106A	0.160463	turquoise	turquoise
THAP9	FAM111A	0.257045	turquoise	turquoise
THAP9	FAM111A.DT	0.147198	turquoise	NA
THAP9	FAM114A2	0.136978	turquoise	turquoise
THAP9	FAM117A	0.110324	turquoise	turquoise
THAP9	FAM117B	0.201574	turquoise	turquoise
THAP9	FAM120A	0.212189	turquoise	turquoise
THAP9	FAM120B	0.275116	turquoise	turquoise
THAP9	FAM120C	0.097412	turquoise	turquoise
THAP9	FAM122A	0.155054	turquoise	turquoise
THAP9	FAM122B	0.324403	turquoise	turquoise
THAP9	FAM122C	0.1674	turquoise	turquoise
THAP9	FAM126A	0.152077	turquoise	turquoise
THAP9	FAM126B	0.132602	turquoise	turquoise
THAP9	FAM133A	0.128994	turquoise	turquoise
THAP9	FAM133B	0.305805	turquoise	turquoise
THAP9	FAM135A	0.226904	turquoise	turquoise
THAP9	FAM13B	0.268724	turquoise	turquoise
THAP9	FAM149B1	0.232533	turquoise	turquoise
THAP9	FAM151B	0.116986	turquoise	turquoise
THAP9	FAM153B	0.091093	turquoise	turquoise
THAP9	FAM156A	0.092275	turquoise	turquoise
THAP9	FAM160B1	0.066247	turquoise	turquoise
THAP9	FAM161A	0.139204	turquoise	turquoise
THAP9	FAM168A	0.159775	turquoise	turquoise
THAP9	FAM168B	0.088374	turquoise	turquoise
THAP9	FAM169A	0.160471	turquoise	turquoise
THAP9	FAM171B	0.1382	turquoise	turquoise
THAP9	FAM172A	0.156359	turquoise	turquoise
THAP9	FAM184A	0.095087	turquoise	turquoise
THAP9	FAM185A	0.148845	turquoise	turquoise
THAP9	FAM199X	0.24174	turquoise	turquoise
THAP9	FAM200A	0.151079	turquoise	turquoise
THAP9	FAM209A	0.148	turquoise	turquoise
THAP9	FAM20B	0.07553	turquoise	turquoise
THAP9	FAM210B	0.132363	turquoise	turquoise
THAP9	FAM214A	0.129755	turquoise	turquoise
THAP9	FAM216A	0.144566	turquoise	turquoise
THAP9	FAM221A	0.172869	turquoise	turquoise
THAP9	FAM222B	0.143873	turquoise	turquoise
THAP9	FAM47E	0.10951	turquoise	turquoise
THAP9	FAM53C	0.162399	turquoise	turquoise
THAP9	FAM66C	0.154492	turquoise	turquoise
THAP9	FAM71D	0.14429	turquoise	turquoise
THAP9	FAM76B	0.272918	turquoise	turquoise
THAP9	FAM8A1	0.219036	turquoise	turquoise
THAP9	FAM91A1	0.269988	turquoise	turquoise
THAP9	FAM98B	0.17842	turquoise	turquoise
THAP9	FAN1	0.130082	turquoise	turquoise
THAP9	FANCB	0.173346	turquoise	turquoise
THAP9	FANCE	0.056723	turquoise	turquoise
THAP9	FANCL	0.22191	turquoise	turquoise
THAP9	FANCM	0.252881	turquoise	turquoise
THAP9	FAR1	0.235877	turquoise	turquoise
THAP9	FARP2	0.229566	turquoise	turquoise
THAP9	FAS	0.137133	turquoise	turquoise
THAP9	FASTKD1	0.16459	turquoise	turquoise
THAP9	FASTKD2	0.26404	turquoise	turquoise
THAP9	FASTKD3	0.279658	turquoise	turquoise
THAP9	FASTKD5	0.150639	turquoise	turquoise
THAP9	FAT1	0.118796	turquoise	turquoise
THAP9	FBH1	0.081875	turquoise	turquoise
THAP9	FBXL13	0.151668	turquoise	turquoise
THAP9	FBXL17	0.103275	turquoise	turquoise
THAP9	FBXL18	0.063516	turquoise	turquoise
THAP9	FBXL20	0.144267	turquoise	turquoise
THAP9	FBXL3	0.151514	turquoise	turquoise
THAP9	FBXL4	0.213406	turquoise	turquoise
THAP9	FBXO11	0.157181	turquoise	turquoise
THAP9	FBXO21	0.17352	turquoise	turquoise
THAP9	FBXO22	0.242091	turquoise	turquoise
THAP9	FBXO25	0.288163	turquoise	turquoise
THAP9	FBXO28	0.308906	turquoise	turquoise
THAP9	FBXO3	0.215966	turquoise	turquoise
THAP9	FBXO30	0.256069	turquoise	turquoise
THAP9	FBXO30.DT	0.162551	turquoise	NA
THAP9	FBXO34	0.175546	turquoise	turquoise
THAP9	FBXO38	0.245999	turquoise	turquoise
THAP9	FBXO39	0.124281	turquoise	turquoise
THAP9	FBXO42	0.175283	turquoise	turquoise
THAP9	FBXO48	0.11036	turquoise	turquoise
THAP9	FBXO5	0.201375	turquoise	turquoise
THAP9	FBXO9	0.102702	turquoise	turquoise
THAP9	FBXW11	0.223707	turquoise	turquoise
THAP9	FBXW11P1	0.079211	turquoise	turquoise
THAP9	FBXW2	0.087088	turquoise	turquoise
THAP9	FBXW7	0.160735	turquoise	turquoise
THAP9	FBXW7.AS1	0.159939	turquoise	NA
THAP9	FCF1	0.170642	turquoise	turquoise
THAP9	FCHO2	0.210043	turquoise	turquoise
THAP9	FDXACB1	0.121334	turquoise	turquoise
THAP9	FECH	0.135133	turquoise	turquoise
THAP9	FEM1B	0.325079	turquoise	turquoise
THAP9	FEM1C	0.138557	turquoise	turquoise
THAP9	FER	0.102732	turquoise	turquoise
THAP9	FGD4	0.07314	turquoise	turquoise
THAP9	FGD6	0.155243	turquoise	turquoise
THAP9	FGFR1OP2	0.187205	turquoise	turquoise
THAP9	FICD	0.055315	turquoise	turquoise
THAP9	FIGLA	0.107188	turquoise	turquoise
THAP9	FIGNL1	0.209226	turquoise	turquoise
THAP9	FIGNL2.DT	0.09311	turquoise	NA
THAP9	FIP1L1	0.155182	turquoise	turquoise
THAP9	FKBP14	0.103829	turquoise	turquoise
THAP9	FKBP15	0.093931	turquoise	turquoise
THAP9	FKTN	0.248653	turquoise	turquoise
THAP9	FLCN	0.097342	turquoise	turquoise
THAP9	FLG	0.06309	turquoise	turquoise
THAP9	FLG.AS1	0.094416	turquoise	NA
THAP9	FLJ22447	0.149887	turquoise	turquoise
THAP9	FLJ31104	0.149209	turquoise	turquoise
THAP9	FLJ46284	0.143404	turquoise	turquoise
THAP9	FLVCR1	0.2025	turquoise	turquoise
THAP9	FMO4	0.112225	turquoise	turquoise
THAP9	FMR1	0.29981	turquoise	turquoise
THAP9	FNBP1	0.118	turquoise	turquoise
THAP9	FNBP1L	0.219671	turquoise	turquoise
THAP9	FNDC3A	0.303413	turquoise	turquoise
THAP9	FNDC3B	0.05839	turquoise	turquoise
THAP9	FNIP1	0.096705	turquoise	turquoise
THAP9	FOCAD	0.120548	turquoise	turquoise
THAP9	FOXC1	0.150735	turquoise	turquoise
THAP9	FOXJ2	0.197656	turquoise	turquoise
THAP9	FOXJ3	0.256391	turquoise	turquoise
THAP9	FOXK2	0.129502	turquoise	turquoise
THAP9	FOXP1	0.143977	turquoise	turquoise
THAP9	FOXRED2	0.136061	turquoise	turquoise
THAP9	FPGT	0.193872	turquoise	turquoise
THAP9	FRA10AC1	0.099995	turquoise	turquoise
THAP9	FRAS1	0.138003	turquoise	turquoise
THAP9	FRMD4B	0.13854	turquoise	turquoise
THAP9	FRRS1	0.140738	turquoise	turquoise
THAP9	FRYL	0.1662	turquoise	turquoise
THAP9	FSIP2.AS1	0.176995	turquoise	NA
THAP9	FTX	0.141541	turquoise	turquoise
THAP9	FUBP1	0.284854	turquoise	turquoise
THAP9	FUBP3	0.166352	turquoise	turquoise
THAP9	FUT10	0.145994	turquoise	turquoise
THAP9	FUT8	0.116592	turquoise	turquoise
THAP9	FYTTD1	0.12978	turquoise	turquoise
THAP9	FZD6	0.234782	turquoise	turquoise
THAP9	G2E3	0.331878	turquoise	turquoise
THAP9	G3BP1	0.278563	turquoise	turquoise
THAP9	G3BP2	0.180045	turquoise	turquoise
THAP9	GAB1	0.192396	turquoise	turquoise
THAP9	GABPA	0.183138	turquoise	turquoise
THAP9	GABPB1	0.211871	turquoise	turquoise
THAP9	GABPB2	0.091435	turquoise	turquoise
THAP9	GALC	0.187764	turquoise	turquoise
THAP9	GALK2	0.142482	turquoise	turquoise
THAP9	GALNT1	0.153996	turquoise	turquoise
THAP9	GALNT10	0.096761	turquoise	turquoise
THAP9	GALNT11	0.099624	turquoise	turquoise
THAP9	GALNT5	0.162011	turquoise	turquoise
THAP9	GAN	0.153573	turquoise	turquoise
THAP9	GANAB	0.100039	turquoise	turquoise
THAP9	GANC	0.141627	turquoise	turquoise
THAP9	GAPVD1	0.191771	turquoise	turquoise
THAP9	GAREM1	0.122645	turquoise	turquoise
THAP9	GARRE1	0.074956	turquoise	turquoise
THAP9	GART	0.156939	turquoise	turquoise
THAP9	GAS2L3	0.106511	turquoise	turquoise
THAP9	GAS6.DT	0.106039	turquoise	NA
THAP9	GASK1B	0.119232	turquoise	turquoise
THAP9	GATAD1	0.206414	turquoise	turquoise
THAP9	GATAD2B	0.243448	turquoise	turquoise
THAP9	GATC	0.135093	turquoise	turquoise
THAP9	GATM	0.153527	turquoise	turquoise
THAP9	GBF1	0.114896	turquoise	turquoise
THAP9	GBP2	0.103737	turquoise	turquoise
THAP9	GBP3	0.143349	turquoise	turquoise
THAP9	GCA	0.131168	turquoise	turquoise
THAP9	GCC2	0.289663	turquoise	turquoise
THAP9	GCFC2	0.177613	turquoise	turquoise
THAP9	GCH1	0.139591	turquoise	turquoise
THAP9	GCLM	0.133543	turquoise	turquoise
THAP9	GCN1	0.090585	turquoise	turquoise
THAP9	GCNA	0.068249	turquoise	turquoise
THAP9	GCNT1	0.100803	turquoise	turquoise
THAP9	GCNT4	0.158034	turquoise	turquoise
THAP9	GDAP2	0.137811	turquoise	turquoise
THAP9	GDF11	0.104804	turquoise	turquoise
THAP9	GDPD1	0.162555	turquoise	turquoise
THAP9	GDPGP1	0.115971	turquoise	turquoise
THAP9	GEMIN5	0.164988	turquoise	turquoise
THAP9	GFM1	0.135123	turquoise	turquoise
THAP9	GFM2	0.185112	turquoise	turquoise
THAP9	GFPT1	0.064468	turquoise	turquoise
THAP9	GGCX	0.070743	turquoise	turquoise
THAP9	GGH	0.127079	turquoise	turquoise
THAP9	GGNBP2	0.104596	turquoise	turquoise
THAP9	GIGYF2	0.198134	turquoise	turquoise
THAP9	GIN1	0.201751	turquoise	turquoise
THAP9	GINS3	0.049397	turquoise	turquoise
THAP9	GIT2	0.101284	turquoise	turquoise
THAP9	GK	0.157433	turquoise	turquoise
THAP9	GK5	0.195366	turquoise	turquoise
THAP9	GLCE	0.166448	turquoise	turquoise
THAP9	GLE1	0.128386	turquoise	turquoise
THAP9	GLG1	0.075558	turquoise	turquoise
THAP9	GLIPR1L1	0.139181	turquoise	turquoise
THAP9	GLIPR1L2	0.121661	turquoise	turquoise
THAP9	GLMN	0.255079	turquoise	turquoise
THAP9	GLRA1	0.034857	turquoise	turquoise
THAP9	GLS	0.110437	turquoise	turquoise
THAP9	GLT8D2	0.110966	turquoise	turquoise
THAP9	GMCL1	0.122899	turquoise	turquoise
THAP9	GMEB1	0.200315	turquoise	turquoise
THAP9	GMFB	0.105781	turquoise	turquoise
THAP9	GMPS	0.280747	turquoise	turquoise
THAP9	GNA13	0.187814	turquoise	turquoise
THAP9	GNAL	0.061859	turquoise	turquoise
THAP9	GNAQ	0.13772	turquoise	turquoise
THAP9	GNB4	0.126253	turquoise	turquoise
THAP9	GNE	0.138657	turquoise	turquoise
THAP9	GNG12.AS1	0.149018	turquoise	NA
THAP9	GNL2	0.130287	turquoise	turquoise
THAP9	GNL3	0.155033	turquoise	turquoise
THAP9	GNL3L	0.141598	turquoise	turquoise
THAP9	GNPDA2	0.210359	turquoise	turquoise
THAP9	GNPNAT1	0.203658	turquoise	turquoise
THAP9	GNPTAB	0.193961	turquoise	turquoise
THAP9	GNRHR	0.166837	turquoise	turquoise
THAP9	GNRHR2	0.133064	turquoise	turquoise
THAP9	GOLGA1	0.214827	turquoise	turquoise
THAP9	GOLGA3	0.062712	turquoise	turquoise
THAP9	GOLGA4	0.091426	turquoise	turquoise
THAP9	GOLGA5	0.160626	turquoise	turquoise
THAP9	GOLGA8F	0.047478	turquoise	turquoise
THAP9	GOLGA8N	0.087336	turquoise	turquoise
THAP9	GOLGA8R	0.039956	turquoise	turquoise
THAP9	GOLGA8T	0.044101	turquoise	turquoise
THAP9	GOLGB1	0.22276	turquoise	turquoise
THAP9	GOLM2	0.15899	turquoise	turquoise
THAP9	GOLPH3	0.174271	turquoise	turquoise
THAP9	GOLPH3L	0.261925	turquoise	turquoise
THAP9	GON4L	0.175547	turquoise	turquoise
THAP9	GOPC	0.375377	turquoise	turquoise
THAP9	GORAB	0.22387	turquoise	turquoise
THAP9	GOSR1	0.377504	turquoise	turquoise
THAP9	GOSR2	0.090133	turquoise	turquoise
THAP9	GPALPP1	0.295551	turquoise	turquoise
THAP9	GPATCH2	0.225365	turquoise	turquoise
THAP9	GPATCH2L	0.275515	turquoise	turquoise
THAP9	GPATCH8	0.217972	turquoise	turquoise
THAP9	GPBP1	0.375837	turquoise	turquoise
THAP9	GPBP1L1	0.315509	turquoise	turquoise
THAP9	GPCPD1	0.161293	turquoise	turquoise
THAP9	GPD2	0.26235	turquoise	turquoise
THAP9	GPHN	0.113538	turquoise	turquoise
THAP9	GPR107	0.1668	turquoise	turquoise
THAP9	GPR135	0.107866	turquoise	turquoise
THAP9	GPR161	0.109388	turquoise	turquoise
THAP9	GPR199P	0.138919	turquoise	turquoise
THAP9	GPR3	0.048282	turquoise	turquoise
THAP9	GPR62	0.018667	turquoise	turquoise
THAP9	GPR63	0.163546	turquoise	turquoise
THAP9	GPR89A	0.137256	turquoise	turquoise
THAP9	GPR89B	0.187436	turquoise	turquoise
THAP9	GPRASP1	0.135512	turquoise	turquoise
THAP9	GPRC5A	0.054604	turquoise	turquoise
THAP9	GPRC5B	0.101642	turquoise	turquoise
THAP9	GRB10	0.098309	turquoise	turquoise
THAP9	GRM1	0.117237	turquoise	turquoise
THAP9	GRM2	0.154475	turquoise	turquoise
THAP9	GRM3	0.077939	turquoise	turquoise
THAP9	GRM7	0.047087	turquoise	turquoise
THAP9	GRPEL2	0.111512	turquoise	turquoise
THAP9	GSAP	0.243299	turquoise	turquoise
THAP9	GSK3B	0.281447	turquoise	turquoise
THAP9	GSPT1	0.149905	turquoise	turquoise
THAP9	GSR	0.116891	turquoise	turquoise
THAP9	GSTA4	0.128669	turquoise	turquoise
THAP9	GSTCD	0.207916	turquoise	turquoise
THAP9	GTF2A1	0.293888	turquoise	turquoise
THAP9	GTF2B	0.133973	turquoise	turquoise
THAP9	GTF2F2	0.143004	turquoise	turquoise
THAP9	GTF2H1	0.167158	turquoise	turquoise
THAP9	GTF2H2	0.084108	turquoise	turquoise
THAP9	GTF2H2C	0.185343	turquoise	turquoise
THAP9	GTF2H3	0.255456	turquoise	turquoise
THAP9	GTF2I	0.103978	turquoise	turquoise
THAP9	GTF2IP1	0.113411	turquoise	turquoise
THAP9	GTF2IP4	0.11751	turquoise	turquoise
THAP9	GTF2IRD2	0.148919	turquoise	turquoise
THAP9	GTF2IRD2B	0.15348	turquoise	turquoise
THAP9	GTF3C1	0.103897	turquoise	turquoise
THAP9	GTF3C2	0.206827	turquoise	turquoise
THAP9	GTF3C3	0.259756	turquoise	turquoise
THAP9	GTF3C4	0.265143	turquoise	turquoise
THAP9	GTPBP10	0.339833	turquoise	turquoise
THAP9	GTPBP2	0.08414	turquoise	turquoise
THAP9	GTPBP4	0.136723	turquoise	turquoise
THAP9	GUCY1A1	0.144748	turquoise	turquoise
THAP9	GUF1	0.169001	turquoise	turquoise
THAP9	GULP1	0.140131	turquoise	turquoise
THAP9	GUSBP1	0.159584	turquoise	turquoise
THAP9	GUSBP5	0.145386	turquoise	turquoise
THAP9	GXYLT1	0.228847	turquoise	turquoise
THAP9	GZF1	0.27694	turquoise	turquoise
THAP9	H1.7	0.056719	turquoise	NA
THAP9	H2AZ2	0.162746	turquoise	turquoise
THAP9	H3.3A	0.12572	turquoise	NA
THAP9	H3.3B	0.148289	turquoise	NA
THAP9	H3C9P	0.097881	turquoise	turquoise
THAP9	H3P14	0.129843	turquoise	turquoise
THAP9	HACE1	0.276526	turquoise	turquoise
THAP9	HAND2.AS1	0.066593	turquoise	NA
THAP9	HARBI1	0.109304	turquoise	turquoise
THAP9	HARS2	0.114469	turquoise	turquoise
THAP9	HAT1	0.139359	turquoise	turquoise
THAP9	HAUS2	0.126758	turquoise	turquoise
THAP9	HAUS3	0.280026	turquoise	turquoise
THAP9	HAUS6	0.291564	turquoise	turquoise
THAP9	HAVCR1P1	0.12829	turquoise	turquoise
THAP9	HBP1	0.108336	turquoise	turquoise
THAP9	HBS1L	0.130648	turquoise	turquoise
THAP9	HCFC2	0.096989	turquoise	turquoise
THAP9	HCG11	0.110488	turquoise	turquoise
THAP9	HCG18	0.273824	turquoise	turquoise
THAP9	HDAC1P2	0.057644	turquoise	turquoise
THAP9	HDAC2	0.187951	turquoise	turquoise
THAP9	HDAC2.AS2	0.136042	turquoise	NA
THAP9	HDAC4	0.083972	turquoise	turquoise
THAP9	HDGFL3	0.140652	turquoise	turquoise
THAP9	HDHD2	0.143159	turquoise	turquoise
THAP9	HDLBP	0.046606	turquoise	turquoise
THAP9	HDX	0.268229	turquoise	turquoise
THAP9	HEATR1	0.240826	turquoise	turquoise
THAP9	HEATR5A	0.071893	turquoise	turquoise
THAP9	HEATR5B	0.2696	turquoise	turquoise
THAP9	HEATR6	0.225364	turquoise	turquoise
THAP9	HECA	0.119308	turquoise	turquoise
THAP9	HECTD1	0.118561	turquoise	turquoise
THAP9	HECTD2	0.260164	turquoise	turquoise
THAP9	HELQ	0.246387	turquoise	turquoise
THAP9	HELZ	0.146514	turquoise	turquoise
THAP9	HEPHL1	0.108299	turquoise	turquoise
THAP9	HERC1	0.117529	turquoise	turquoise
THAP9	HERC2	0.110094	turquoise	turquoise
THAP9	HERC2P2	0.130602	turquoise	turquoise
THAP9	HERC2P3	0.068813	turquoise	turquoise
THAP9	HERC2P9	0.138496	turquoise	turquoise
THAP9	HERC4	0.309228	turquoise	turquoise
THAP9	HERPUD2	0.232057	turquoise	turquoise
THAP9	HESX1	0.156618	turquoise	turquoise
THAP9	HEY1	0.017963	turquoise	turquoise
THAP9	HEY2	0.143063	turquoise	turquoise
THAP9	HFE	0.099884	turquoise	turquoise
THAP9	HFM1	0.138291	turquoise	turquoise
THAP9	HGSNAT	0.085806	turquoise	turquoise
THAP9	HIC2	0.055335	turquoise	turquoise
THAP9	HIF1A	0.126117	turquoise	turquoise
THAP9	HIF1A.AS1	0.025634	turquoise	NA
THAP9	HINT3	0.171072	turquoise	turquoise
THAP9	HIPK1	0.132708	turquoise	turquoise
THAP9	HIPK3	0.068781	turquoise	turquoise
THAP9	HIVEP1	0.143909	turquoise	turquoise
THAP9	HIVEP2	0.092078	turquoise	turquoise
THAP9	HIVEP3	0.145987	turquoise	turquoise
THAP9	HLA.F.AS1	0.147391	turquoise	NA
THAP9	HLCS	0.1406	turquoise	turquoise
THAP9	HLF	0.106252	turquoise	turquoise
THAP9	HLTF	0.239588	turquoise	turquoise
THAP9	HMBOX1	0.105222	turquoise	turquoise
THAP9	HMG20A	0.179139	turquoise	turquoise
THAP9	HMGB3P29	0.126058	turquoise	turquoise
THAP9	HMGN3.AS1	0.109883	turquoise	NA
THAP9	HMGN4	0.146471	turquoise	turquoise
THAP9	HMGN5	0.120061	turquoise	turquoise
THAP9	HMGXB4	0.267074	turquoise	turquoise
THAP9	HNRNPA1P45	0.062053	turquoise	turquoise
THAP9	HNRNPA2B1	0.126036	turquoise	turquoise
THAP9	HNRNPA3	0.203245	turquoise	turquoise
THAP9	HNRNPA3P12	0.063999	turquoise	turquoise
THAP9	HNRNPD	0.131996	turquoise	turquoise
THAP9	HNRNPDL	0.221433	turquoise	turquoise
THAP9	HNRNPH1	0.237584	turquoise	turquoise
THAP9	HNRNPH2	0.128476	turquoise	turquoise
THAP9	HNRNPH3	0.131209	turquoise	turquoise
THAP9	HNRNPK	0.189375	turquoise	turquoise
THAP9	HNRNPL	0.150205	turquoise	turquoise
THAP9	HNRNPLL	0.266765	turquoise	turquoise
THAP9	HNRNPR	0.202248	turquoise	turquoise
THAP9	HNRNPU	0.217304	turquoise	turquoise
THAP9	HNRNPUL1	0.099594	turquoise	turquoise
THAP9	HOMEZ	0.111844	turquoise	turquoise
THAP9	HOOK3	0.133254	turquoise	turquoise
THAP9	HOXA3	0.117564	turquoise	turquoise
THAP9	HOXA5	0.09178	turquoise	turquoise
THAP9	HOXB3	0.079728	turquoise	turquoise
THAP9	HP1BP3	0.327873	turquoise	turquoise
THAP9	HPS3	0.251211	turquoise	turquoise
THAP9	HPS5	0.155836	turquoise	turquoise
THAP9	HS2ST1	0.30459	turquoise	turquoise
THAP9	HSD17B4	0.063656	turquoise	turquoise
THAP9	HSDL1	0.240145	turquoise	turquoise
THAP9	HSF2	0.179911	turquoise	turquoise
THAP9	HSP90AA1	0.132847	turquoise	turquoise
THAP9	HSP90AB2P	0.087943	turquoise	turquoise
THAP9	HSP90B1	0.106226	turquoise	turquoise
THAP9	HSP90B2P	0.144384	turquoise	turquoise
THAP9	HSPA13	0.17632	turquoise	turquoise
THAP9	HSPA14	0.311868	turquoise	turquoise
THAP9	HSPA4	0.123719	turquoise	turquoise
THAP9	HSPA9	0.136743	turquoise	turquoise
THAP9	HTD2	0.152854	turquoise	turquoise
THAP9	HTR7P1	0.115267	turquoise	turquoise
THAP9	HTT	0.08468	turquoise	turquoise
THAP9	HUS1	0.181057	turquoise	turquoise
THAP9	HUWE1	0.134212	turquoise	turquoise
THAP9	HYKK	0.088885	turquoise	turquoise
THAP9	IARS1	0.177034	turquoise	turquoise
THAP9	IARS2	0.070529	turquoise	turquoise
THAP9	IBA57	0.107688	turquoise	turquoise
THAP9	IBTK	0.219882	turquoise	turquoise
THAP9	ICA1L	0.100449	turquoise	turquoise
THAP9	ICE1	0.326272	turquoise	turquoise
THAP9	ICE2	0.254869	turquoise	turquoise
THAP9	IDE	0.134626	turquoise	turquoise
THAP9	IDS	0.134131	turquoise	turquoise
THAP9	IFNA20P	0.134772	turquoise	turquoise
THAP9	IFNAR1	0.08018	turquoise	turquoise
THAP9	IFRD1	0.155734	turquoise	turquoise
THAP9	IFT57	0.122304	turquoise	turquoise
THAP9	IFT74	0.276718	turquoise	turquoise
THAP9	IFT80	0.275032	turquoise	turquoise
THAP9	IGSF10	0.072943	turquoise	turquoise
THAP9	IKZF2	0.166222	turquoise	turquoise
THAP9	IKZF4	0.121547	turquoise	turquoise
THAP9	IKZF5	0.304636	turquoise	turquoise
THAP9	IL13RA2	0.064516	turquoise	turquoise
THAP9	IL17RA	0.052542	turquoise	turquoise
THAP9	IL1RAP	0.177825	turquoise	turquoise
THAP9	IL6ST	0.104528	turquoise	turquoise
THAP9	IL7	0.132005	turquoise	turquoise
THAP9	IMPA1	0.146279	turquoise	turquoise
THAP9	IMPACT	0.251183	turquoise	turquoise
THAP9	IMPG2	0.13237	turquoise	turquoise
THAP9	ING1	0.116849	turquoise	turquoise
THAP9	ING3	0.181438	turquoise	turquoise
THAP9	INIP	0.260486	turquoise	turquoise
THAP9	INO80	0.195115	turquoise	turquoise
THAP9	INO80D	0.262032	turquoise	turquoise
THAP9	INPP4A	0.129075	turquoise	turquoise
THAP9	INPP5B	0.123186	turquoise	turquoise
THAP9	INPP5E	0.076171	turquoise	turquoise
THAP9	INPP5F	0.243603	turquoise	turquoise
THAP9	INSIG2	0.137061	turquoise	turquoise
THAP9	INSR	0.122191	turquoise	turquoise
THAP9	INTS10	0.096097	turquoise	turquoise
THAP9	INTS12	0.19068	turquoise	turquoise
THAP9	INTS13	0.180113	turquoise	turquoise
THAP9	INTS14	0.192026	turquoise	turquoise
THAP9	INTS2	0.244585	turquoise	turquoise
THAP9	INTS4	0.167123	turquoise	turquoise
THAP9	INTS6	0.181649	turquoise	turquoise
THAP9	INTS6.AS1	0.149388	turquoise	NA
THAP9	INTS7	0.218333	turquoise	turquoise
THAP9	INTS8	0.31005	turquoise	turquoise
THAP9	INVS	0.065327	turquoise	turquoise
THAP9	IP6K1	0.104331	turquoise	turquoise
THAP9	IPMK	0.146371	turquoise	turquoise
THAP9	IPO11	0.192244	turquoise	turquoise
THAP9	IPO7	0.155198	turquoise	turquoise
THAP9	IPO8	0.277213	turquoise	turquoise
THAP9	IPO9	0.211383	turquoise	turquoise
THAP9	IPP	0.170017	turquoise	turquoise
THAP9	IQCB1	0.165258	turquoise	turquoise
THAP9	IQCG	0.140653	turquoise	turquoise
THAP9	IQCH.AS1	0.206327	turquoise	NA
THAP9	IQCK	0.201186	turquoise	turquoise
THAP9	IQGAP1	0.156276	turquoise	turquoise
THAP9	IRAG1.AS1	0.083809	turquoise	NA
THAP9	IRAK1BP1	0.232202	turquoise	turquoise
THAP9	IRAK4	0.216549	turquoise	turquoise
THAP9	IREB2	0.226832	turquoise	turquoise
THAP9	IRF2	0.118898	turquoise	turquoise
THAP9	IRF2BP2	0.166979	turquoise	turquoise
THAP9	IRF2BPL	0.121708	turquoise	turquoise
THAP9	IRGQ	0.122191	turquoise	turquoise
THAP9	ISG20L2	0.133645	turquoise	turquoise
THAP9	ITCH	0.211475	turquoise	turquoise
THAP9	ITFG2.AS1	0.067467	turquoise	NA
THAP9	ITGA2B	0.007571	turquoise	turquoise
THAP9	ITGA6	0.155164	turquoise	turquoise
THAP9	ITGA9	0.08585	turquoise	turquoise
THAP9	ITGAV	0.089331	turquoise	turquoise
THAP9	ITGB3BP	0.148637	turquoise	turquoise
THAP9	ITGB8	0.17276	turquoise	turquoise
THAP9	ITPR2	0.16157	turquoise	turquoise
THAP9	ITPRID2	0.138996	turquoise	turquoise
THAP9	ITSN2	0.087899	turquoise	turquoise
THAP9	IVNS1ABP	0.156514	turquoise	turquoise
THAP9	JADE1	0.062759	turquoise	turquoise
THAP9	JAK2	0.07987	turquoise	turquoise
THAP9	JKAMP	0.153726	turquoise	turquoise
THAP9	JMJD1C	0.194075	turquoise	turquoise
THAP9	JMY	0.283519	turquoise	turquoise
THAP9	JOSD1	0.127916	turquoise	turquoise
THAP9	JPX	0.201431	turquoise	turquoise
THAP9	JRKL	0.207535	turquoise	turquoise
THAP9	KANSL1	0.204087	turquoise	turquoise
THAP9	KANSL1L	0.120051	turquoise	turquoise
THAP9	KANSL2	0.182089	turquoise	turquoise
THAP9	KANSL3	0.133968	turquoise	turquoise
THAP9	KAT6A	0.233994	turquoise	turquoise
THAP9	KAT6B	0.164903	turquoise	turquoise
THAP9	KAT7	0.211915	turquoise	turquoise
THAP9	KATNBL1	0.15101	turquoise	turquoise
THAP9	KATNBL1P5	0.082063	turquoise	turquoise
THAP9	KAZN	0.135535	turquoise	turquoise
THAP9	KBTBD2	0.128472	turquoise	turquoise
THAP9	KBTBD3	0.135787	turquoise	turquoise
THAP9	KBTBD4	0.125694	turquoise	turquoise
THAP9	KBTBD6	0.155106	turquoise	turquoise
THAP9	KBTBD7	0.144601	turquoise	turquoise
THAP9	KCND3	0.079646	turquoise	turquoise
THAP9	KCNE1	0.116132	turquoise	turquoise
THAP9	KCNIP4	0.182138	turquoise	turquoise
THAP9	KCNJ2	0.120533	turquoise	turquoise
THAP9	KCNJ9	0.147209	turquoise	turquoise
THAP9	KCNMB3	0.133695	turquoise	turquoise
THAP9	KCNMB4	0.108183	turquoise	turquoise
THAP9	KCNQ3	0.121463	turquoise	turquoise
THAP9	KCNRG	0.145272	turquoise	turquoise
THAP9	KCTD18	0.114973	turquoise	turquoise
THAP9	KCTD21.AS1	0.085158	turquoise	NA
THAP9	KCTD7	0.125354	turquoise	turquoise
THAP9	KCTD9	0.167784	turquoise	turquoise
THAP9	KDM1B	0.298215	turquoise	turquoise
THAP9	KDM2A	0.237963	turquoise	turquoise
THAP9	KDM3A	0.307666	turquoise	turquoise
THAP9	KDM3B	0.230438	turquoise	turquoise
THAP9	KDM4A	0.115636	turquoise	turquoise
THAP9	KDM4C	0.210299	turquoise	turquoise
THAP9	KDM5A	0.289338	turquoise	turquoise
THAP9	KDM5B	0.218858	turquoise	turquoise
THAP9	KDM6A	0.322933	turquoise	turquoise
THAP9	KDM7A	0.140391	turquoise	turquoise
THAP9	KDSR	0.132583	turquoise	turquoise
THAP9	KHDRBS1	0.220512	turquoise	turquoise
THAP9	KHNYN	0.118854	turquoise	turquoise
THAP9	KIAA0040	0.088047	turquoise	turquoise
THAP9	KIAA0100	0.070759	turquoise	turquoise
THAP9	KIAA0232	0.126746	turquoise	turquoise
THAP9	KIAA0586	0.33542	turquoise	turquoise
THAP9	KIAA1109	0.180446	turquoise	turquoise
THAP9	KIAA1143	0.265939	turquoise	turquoise
THAP9	KIAA1191	0.208155	turquoise	turquoise
THAP9	KIAA1328	0.29735	turquoise	turquoise
THAP9	KIAA1586	0.202945	turquoise	turquoise
THAP9	KIAA1671	0.159315	turquoise	turquoise
THAP9	KIAA1841	0.080933	turquoise	turquoise
THAP9	KIAA2026	0.316907	turquoise	turquoise
THAP9	KIDINS220	0.211687	turquoise	turquoise
THAP9	KIF13A	0.086962	turquoise	turquoise
THAP9	KIF20B	0.2587	turquoise	turquoise
THAP9	KIF21A	0.142115	turquoise	turquoise
THAP9	KIF2A	0.190329	turquoise	turquoise
THAP9	KIF3A	0.196783	turquoise	turquoise
THAP9	KIF3B	0.119202	turquoise	turquoise
THAP9	KIF4B	0.041293	turquoise	turquoise
THAP9	KIF5B	0.102238	turquoise	turquoise
THAP9	KIF6	0.108847	turquoise	turquoise
THAP9	KIN	0.28277	turquoise	turquoise
THAP9	KITLG	0.11743	turquoise	turquoise
THAP9	KIZ	0.120472	turquoise	turquoise
THAP9	KLF12	0.158544	turquoise	turquoise
THAP9	KLF6	0.103213	turquoise	turquoise
THAP9	KLF7	0.106359	turquoise	turquoise
THAP9	KLF8	0.068014	turquoise	turquoise
THAP9	KLHDC1	0.153408	turquoise	turquoise
THAP9	KLHDC10	0.166016	turquoise	turquoise
THAP9	KLHDC2	0.131629	turquoise	turquoise
THAP9	KLHL12	0.260665	turquoise	turquoise
THAP9	KLHL15	0.135108	turquoise	turquoise
THAP9	KLHL18	0.103202	turquoise	turquoise
THAP9	KLHL2	0.140191	turquoise	turquoise
THAP9	KLHL21	0.048626	turquoise	turquoise
THAP9	KLHL23	0.165644	turquoise	turquoise
THAP9	KLHL24	0.110153	turquoise	turquoise
THAP9	KLHL28	0.26974	turquoise	turquoise
THAP9	KLHL36	0.063592	turquoise	turquoise
THAP9	KLHL42	0.246352	turquoise	turquoise
THAP9	KLHL7	0.314098	turquoise	turquoise
THAP9	KLHL9	0.329313	turquoise	turquoise
THAP9	KMT2A	0.191522	turquoise	turquoise
THAP9	KMT2C	0.230306	turquoise	turquoise
THAP9	KMT2E	0.256453	turquoise	turquoise
THAP9	KMT5A	0.125638	turquoise	turquoise
THAP9	KMT5B	0.360971	turquoise	turquoise
THAP9	KNTC1	0.181568	turquoise	turquoise
THAP9	KPNA1	0.102069	turquoise	turquoise
THAP9	KPNA4P1	0.077176	turquoise	turquoise
THAP9	KPNA5	0.229636	turquoise	turquoise
THAP9	KPNA6	0.186196	turquoise	turquoise
THAP9	KPNB1	0.119037	turquoise	turquoise
THAP9	KRAS	0.153969	turquoise	turquoise
THAP9	KRBOX4	0.183784	turquoise	turquoise
THAP9	KRCC1	0.108305	turquoise	turquoise
THAP9	KRIT1	0.320176	turquoise	turquoise
THAP9	KRR1	0.313205	turquoise	turquoise
THAP9	KRT18P31	0.057888	turquoise	turquoise
THAP9	KRT24	0.049369	turquoise	turquoise
THAP9	KRTAP29.1	0.066635	turquoise	NA
THAP9	KTN1	0.149897	turquoise	turquoise
THAP9	KYAT3	0.143108	turquoise	turquoise
THAP9	L3HYPDH	0.074617	turquoise	turquoise
THAP9	L3MBTL3	0.172238	turquoise	turquoise
THAP9	LACTB2	0.066537	turquoise	turquoise
THAP9	LAMP2	0.192442	turquoise	turquoise
THAP9	LAMTOR3	0.26082	turquoise	turquoise
THAP9	LANCL1	0.227969	turquoise	turquoise
THAP9	LANCL2	0.139903	turquoise	turquoise
THAP9	LARGE1	0.114841	turquoise	turquoise
THAP9	LARP1	0.081838	turquoise	turquoise
THAP9	LARP1B	0.220221	turquoise	turquoise
THAP9	LARP4	0.170623	turquoise	turquoise
THAP9	LARP4B	0.279002	turquoise	turquoise
THAP9	LARP7	0.161516	turquoise	turquoise
THAP9	LARS1	0.242184	turquoise	turquoise
THAP9	LATS1	0.345175	turquoise	turquoise
THAP9	LCA5	0.163194	turquoise	turquoise
THAP9	LCLAT1	0.225891	turquoise	turquoise
THAP9	LCOR	0.23301	turquoise	turquoise
THAP9	LCORL	0.259055	turquoise	turquoise
THAP9	LDAH	0.098746	turquoise	turquoise
THAP9	LDHAL6B	0.0992	turquoise	turquoise
THAP9	LDLR	0.034954	turquoise	turquoise
THAP9	LDLRAD3	0.150964	turquoise	turquoise
THAP9	LDLRAD4	0.134563	turquoise	turquoise
THAP9	LEMD1.AS1	0.123363	turquoise	NA
THAP9	LEMD3	0.287342	turquoise	turquoise
THAP9	LETM2	0.137286	turquoise	turquoise
THAP9	LETMD1	0.079327	turquoise	turquoise
THAP9	LGALS8	0.105642	turquoise	turquoise
THAP9	LGR4	0.134542	turquoise	turquoise
THAP9	LHFPL2	0.132798	turquoise	turquoise
THAP9	LIAS	0.143002	turquoise	turquoise
THAP9	LIFR	0.098931	turquoise	turquoise
THAP9	LIG4	0.183651	turquoise	turquoise
THAP9	LIMD1	0.127815	turquoise	turquoise
THAP9	LIMS1.AS1	0.111075	turquoise	NA
THAP9	LIN52	0.069824	turquoise	turquoise
THAP9	LIN54	0.371071	turquoise	turquoise
THAP9	LIN7C	0.155653	turquoise	turquoise
THAP9	LIN9	0.262905	turquoise	turquoise
THAP9	LINC.PINT	0.136726	turquoise	NA
THAP9	LINC00205	0.146777	turquoise	turquoise
THAP9	LINC00216	0.167588	turquoise	turquoise
THAP9	LINC00323	0.129515	turquoise	turquoise
THAP9	LINC00467	0.106588	turquoise	turquoise
THAP9	LINC00476	0.134204	turquoise	turquoise
THAP9	LINC00506	0.148268	turquoise	turquoise
THAP9	LINC00536	0.172928	turquoise	turquoise
THAP9	LINC00539	0.149258	turquoise	turquoise
THAP9	LINC00562	0.111979	turquoise	turquoise
THAP9	LINC00574	0.083559	turquoise	turquoise
THAP9	LINC00601	0.015802	turquoise	turquoise
THAP9	LINC00641	0.070217	turquoise	turquoise
THAP9	LINC00662	0.202019	turquoise	turquoise
THAP9	LINC00664	0.143042	turquoise	turquoise
THAP9	LINC00863	0.13848	turquoise	turquoise
THAP9	LINC00886	0.101459	turquoise	turquoise
THAP9	LINC00907	0.089404	turquoise	turquoise
THAP9	LINC00909	0.161098	turquoise	turquoise
THAP9	LINC00910	0.107744	turquoise	turquoise
THAP9	LINC00921	0.043936	turquoise	turquoise
THAP9	LINC00933	0.101415	turquoise	turquoise
THAP9	LINC01006	0.081263	turquoise	turquoise
THAP9	LINC01011	0.125489	turquoise	turquoise
THAP9	LINC01184	0.148762	turquoise	turquoise
THAP9	LINC01229	0.111185	turquoise	turquoise
THAP9	LINC01265	0.171116	turquoise	turquoise
THAP9	LINC01266	0.168707	turquoise	turquoise
THAP9	LINC01278	0.14779	turquoise	turquoise
THAP9	LINC01291	0.068026	turquoise	turquoise
THAP9	LINC01374	0.094186	turquoise	turquoise
THAP9	LINC01587	0.120667	turquoise	turquoise
THAP9	LINC01801	0.126923	turquoise	turquoise
THAP9	LINC01864	0.074549	turquoise	turquoise
THAP9	LINC01909	0.131825	turquoise	turquoise
THAP9	LINC01963	0.124946	turquoise	turquoise
THAP9	LINC01990	0.109248	turquoise	turquoise
THAP9	LINC02035	0.111994	turquoise	turquoise
THAP9	LINC02060	0.052728	turquoise	turquoise
THAP9	LINC02204	0.134288	turquoise	turquoise
THAP9	LINC02207	0.067063	turquoise	turquoise
THAP9	LINC02210	0.150089	turquoise	turquoise
THAP9	LINC02328	0.114623	turquoise	turquoise
THAP9	LINC02453	0.150703	turquoise	turquoise
THAP9	LINC02518	0.139466	turquoise	turquoise
THAP9	LINC02691	0.101379	turquoise	turquoise
THAP9	LINC02709	0.06518	turquoise	turquoise
THAP9	LINC02872	0.123233	turquoise	turquoise
THAP9	LINS1	0.214393	turquoise	turquoise
THAP9	LIPI	0.133947	turquoise	turquoise
THAP9	LIPT1	0.137562	turquoise	turquoise
THAP9	LIPT2	0.132488	turquoise	turquoise
THAP9	LMAN1	0.265475	turquoise	turquoise
THAP9	LMBR1	0.313337	turquoise	turquoise
THAP9	LMBRD1	0.108008	turquoise	turquoise
THAP9	LMBRD2	0.225112	turquoise	turquoise
THAP9	LMCD1.AS1	0.07236	turquoise	NA
THAP9	LMTK2	0.193442	turquoise	turquoise
THAP9	LNC.LBCS	0.095479	turquoise	NA
THAP9	LNPK	0.074923	turquoise	turquoise
THAP9	LNX1	0.145474	turquoise	turquoise
THAP9	LOC100128108	0.123472	turquoise	turquoise
THAP9	LOC100128568	0.137147	turquoise	turquoise
THAP9	LOC100128939	0.163465	turquoise	turquoise
THAP9	LOC100129878	0.153141	turquoise	turquoise
THAP9	LOC100130550	0.097431	turquoise	turquoise
THAP9	LOC100287896	0.143444	turquoise	turquoise
THAP9	LOC100289518	0.164842	turquoise	turquoise
THAP9	LOC100419073	0.129274	turquoise	turquoise
THAP9	LOC100419503	0.148203	turquoise	turquoise
THAP9	LOC100419515	0.141569	turquoise	turquoise
THAP9	LOC100419654	0.090317	turquoise	turquoise
THAP9	LOC100419824	0.130778	turquoise	turquoise
THAP9	LOC100419831	0.166498	turquoise	turquoise
THAP9	LOC100420680	0.082422	turquoise	turquoise
THAP9	LOC100420864	0.141628	turquoise	turquoise
THAP9	LOC100420869	0.027107	turquoise	turquoise
THAP9	LOC100420981	0.156519	turquoise	turquoise
THAP9	LOC100422204	0.106365	turquoise	turquoise
THAP9	LOC100422614	0.09519	turquoise	turquoise
THAP9	LOC100505549	0.133802	turquoise	turquoise
THAP9	LOC100506083	0.07122	turquoise	turquoise
THAP9	LOC100506606	0.169588	turquoise	turquoise
THAP9	LOC100507053	0.146456	turquoise	turquoise
THAP9	LOC100507156	0.109447	turquoise	turquoise
THAP9	LOC100507283	0.125405	turquoise	turquoise
THAP9	LOC100507291	0.125361	turquoise	turquoise
THAP9	LOC100507477	0.067288	turquoise	turquoise
THAP9	LOC100533643	0.031852	turquoise	turquoise
THAP9	LOC100631242	0.121073	turquoise	turquoise
THAP9	LOC100996419	0.149906	turquoise	turquoise
THAP9	LOC101926913	0.140666	turquoise	turquoise
THAP9	LOC101926933	0.132659	turquoise	turquoise
THAP9	LOC101926977	0.149841	turquoise	turquoise
THAP9	LOC101927020	0.087245	turquoise	turquoise
THAP9	LOC101927060	0.09127	turquoise	turquoise
THAP9	LOC101927124	0.125985	turquoise	turquoise
THAP9	LOC101927151	0.121197	turquoise	turquoise
THAP9	LOC101927189	0.131622	turquoise	turquoise
THAP9	LOC101927237	0.154212	turquoise	turquoise
THAP9	LOC101927322	0.147099	turquoise	turquoise
THAP9	LOC101927556	0.109634	turquoise	turquoise
THAP9	LOC101927636	0.139659	turquoise	turquoise
THAP9	LOC101927692	0.109099	turquoise	turquoise
THAP9	LOC101927751	0.153629	turquoise	turquoise
THAP9	LOC101927815	0.016807	turquoise	turquoise
THAP9	LOC101928053	0.141261	turquoise	turquoise
THAP9	LOC101928063	0.051764	turquoise	turquoise
THAP9	LOC101928118	0.078167	turquoise	turquoise
THAP9	LOC101928371	0.116179	turquoise	turquoise
THAP9	LOC101928909	0.133349	turquoise	turquoise
THAP9	LOC101928988	0.03353	turquoise	turquoise
THAP9	LOC101929054	0.106084	turquoise	turquoise
THAP9	LOC101929089	0.072258	turquoise	turquoise
THAP9	LOC101929109	0.073531	turquoise	turquoise
THAP9	LOC101929140	0.138962	turquoise	turquoise
THAP9	LOC101929268	0.112215	turquoise	turquoise
THAP9	LOC101929657	0.112852	turquoise	turquoise
THAP9	LOC101929709	0.16975	turquoise	turquoise
THAP9	LOC101929710	0.130862	turquoise	turquoise
THAP9	LOC101930085	0.129406	turquoise	turquoise
THAP9	LOC101930275	0.1597	turquoise	turquoise
THAP9	LOC102546294	0.11925	turquoise	turquoise
THAP9	LOC102606465	0.123657	turquoise	turquoise
THAP9	LOC102724421	0.111436	turquoise	turquoise
THAP9	LOC102724593	0.102964	turquoise	turquoise
THAP9	LOC103344931	0.048164	turquoise	turquoise
THAP9	LOC105369147	0.141071	turquoise	turquoise
THAP9	LOC105372482	0.090514	turquoise	turquoise
THAP9	LOC105374618	0.034538	turquoise	turquoise
THAP9	LOC105375614	0.072344	turquoise	turquoise
THAP9	LOC105375903	0.040556	turquoise	turquoise
THAP9	LOC105376748	0.02814	turquoise	turquoise
THAP9	LOC105377623	0.126594	turquoise	turquoise
THAP9	LOC105378083	0.122172	turquoise	turquoise
THAP9	LOC105378721	0.168445	turquoise	turquoise
THAP9	LOC106699570	0.108078	turquoise	turquoise
THAP9	LOC107986114	0.132988	turquoise	turquoise
THAP9	LOC112268269	0.13084	turquoise	turquoise
THAP9	LOC114841040	0.100356	turquoise	turquoise
THAP9	LOC152048	0.119385	turquoise	turquoise
THAP9	LOC257396	0.060143	turquoise	turquoise
THAP9	LOC283387	0.08055	turquoise	turquoise
THAP9	LOC284685	0.122533	turquoise	turquoise
THAP9	LOC285593	0.121647	turquoise	turquoise
THAP9	LOC285626	0.130968	turquoise	turquoise
THAP9	LOC339803	0.082028	turquoise	turquoise
THAP9	LOC340512	0.105004	turquoise	turquoise
THAP9	LOC374443	0.150136	turquoise	turquoise
THAP9	LOC390332	0.084016	turquoise	turquoise
THAP9	LOC392266	0.116944	turquoise	turquoise
THAP9	LOC441666	0.142278	turquoise	turquoise
THAP9	LOC642361	0.13014	turquoise	turquoise
THAP9	LOC643630	0.095802	turquoise	turquoise
THAP9	LOC646674	0.057923	turquoise	turquoise
THAP9	LOC648987	0.069843	turquoise	turquoise
THAP9	LOH12CR2	0.061572	turquoise	turquoise
THAP9	LONRF1	0.107337	turquoise	turquoise
THAP9	LONRF3	0.080171	turquoise	turquoise
THAP9	LOXL1.AS1	0.142354	turquoise	NA
THAP9	LPAR6	0.124252	turquoise	turquoise
THAP9	LPCAT2	0.153202	turquoise	turquoise
THAP9	LPIN2	0.098281	turquoise	turquoise
THAP9	LPP	0.149432	turquoise	turquoise
THAP9	LPP.AS2	0.109049	turquoise	NA
THAP9	LRCH1	0.144282	turquoise	turquoise
THAP9	LRCH3	0.317344	turquoise	turquoise
THAP9	LRFN5	0.133916	turquoise	turquoise
THAP9	LRIF1	0.208113	turquoise	turquoise
THAP9	LRIG1	0.113959	turquoise	turquoise
THAP9	LRIG2	0.229575	turquoise	turquoise
THAP9	LRIG3	0.14029	turquoise	turquoise
THAP9	LRP12	0.162796	turquoise	turquoise
THAP9	LRP2BP	0.164675	turquoise	turquoise
THAP9	LRP6	0.239565	turquoise	turquoise
THAP9	LRPPRC	0.154523	turquoise	turquoise
THAP9	LRRC3.DT	0.008167	turquoise	NA
THAP9	LRRC37A	0.163994	turquoise	turquoise
THAP9	LRRC37A17P	0.065881	turquoise	turquoise
THAP9	LRRC37B	0.165536	turquoise	turquoise
THAP9	LRRC40	0.229279	turquoise	turquoise
THAP9	LRRC41	0.110585	turquoise	turquoise
THAP9	LRRC43	0.046609	turquoise	turquoise
THAP9	LRRC49	0.159441	turquoise	turquoise
THAP9	LRRC53	0.075474	turquoise	turquoise
THAP9	LRRC57	0.283825	turquoise	turquoise
THAP9	LRRC58	0.284116	turquoise	turquoise
THAP9	LRRC6	0.137597	turquoise	turquoise
THAP9	LRRC8B	0.134946	turquoise	turquoise
THAP9	LRRC8D	0.150432	turquoise	turquoise
THAP9	LRRC9	0.058593	turquoise	turquoise
THAP9	LRRCC1	0.210245	turquoise	turquoise
THAP9	LRRD1	0.145544	turquoise	turquoise
THAP9	LRRFIP2	0.148243	turquoise	turquoise
THAP9	LRRIQ1	0.153136	turquoise	turquoise
THAP9	LRRK1	0.111136	turquoise	turquoise
THAP9	LRRTM2	0.097417	turquoise	turquoise
THAP9	LSG1	0.172868	turquoise	turquoise
THAP9	LSM11	0.21374	turquoise	turquoise
THAP9	LSM12	0.128967	turquoise	turquoise
THAP9	LSM14A	0.304438	turquoise	turquoise
THAP9	LTN1	0.298146	turquoise	turquoise
THAP9	LTV1	0.133691	turquoise	turquoise
THAP9	LUC7L2	0.239528	turquoise	turquoise
THAP9	LURAP1	0.11975	turquoise	turquoise
THAP9	LUZP1	0.105697	turquoise	turquoise
THAP9	LY75	0.157934	turquoise	turquoise
THAP9	LYG2	0.128487	turquoise	turquoise
THAP9	LYPLA1	0.159769	turquoise	turquoise
THAP9	LYRM2	0.286964	turquoise	turquoise
THAP9	LYSMD1	0.124854	turquoise	turquoise
THAP9	LYSMD3	0.241209	turquoise	turquoise
THAP9	LYST	0.087351	turquoise	turquoise
THAP9	LZIC	0.268976	turquoise	turquoise
THAP9	LZTFL1	0.222586	turquoise	turquoise
THAP9	M6PR	0.118642	turquoise	turquoise
THAP9	MACC1.AS1	0.07714	turquoise	NA
THAP9	MACF1	0.114682	turquoise	turquoise
THAP9	MACO1	0.157722	turquoise	turquoise
THAP9	MACROD2	0.166314	turquoise	turquoise
THAP9	MAFTRR	0.094112	turquoise	turquoise
THAP9	MAGEE2	0.087303	turquoise	turquoise
THAP9	MAGI1	0.1366	turquoise	turquoise
THAP9	MAGI1.IT1	0.164878	turquoise	NA
THAP9	MAGI2	0.082702	turquoise	turquoise
THAP9	MAGOHB	0.225531	turquoise	turquoise
THAP9	MAGT1	0.250973	turquoise	turquoise
THAP9	MAK	0.140181	turquoise	turquoise
THAP9	MAK16	0.20978	turquoise	turquoise
THAP9	MALAT1	0.132973	turquoise	turquoise
THAP9	MALT1	0.288487	turquoise	turquoise
THAP9	MAMDC2.AS1	0.156615	turquoise	NA
THAP9	MAML1	0.211848	turquoise	turquoise
THAP9	MAML2	0.161871	turquoise	turquoise
THAP9	MAN1A2	0.077896	turquoise	turquoise
THAP9	MAN2A1	0.120255	turquoise	turquoise
THAP9	MANBA	0.103526	turquoise	turquoise
THAP9	MANEA	0.09925	turquoise	turquoise
THAP9	MANSC1	0.126883	turquoise	turquoise
THAP9	MAP10	0.150214	turquoise	turquoise
THAP9	MAP1LC3B2	0.131063	turquoise	turquoise
THAP9	MAP2	0.150297	turquoise	turquoise
THAP9	MAP2K4	0.270502	turquoise	turquoise
THAP9	MAP2K4P1	0.148949	turquoise	turquoise
THAP9	MAP2K5	0.100979	turquoise	turquoise
THAP9	MAP3K12	0.100878	turquoise	turquoise
THAP9	MAP3K13	0.196432	turquoise	turquoise
THAP9	MAP3K2	0.250909	turquoise	turquoise
THAP9	MAP3K20.AS1	0.135298	turquoise	NA
THAP9	MAP3K4	0.265637	turquoise	turquoise
THAP9	MAP3K7	0.3767	turquoise	turquoise
THAP9	MAP4K2	0.078548	turquoise	turquoise
THAP9	MAP4K3	0.254671	turquoise	turquoise
[truncated: 2,650 more rows]

## Sheet: BRCA_tumor
gene1	gene2	correlation	module1	module2
THAP9	AAK1	0.001613	turquoise	turquoise
THAP9	AASDH	0.006758	turquoise	turquoise
THAP9	AASDHPPT	0.001328	turquoise	turquoise
THAP9	ABCB7	0.002812	turquoise	turquoise
THAP9	ABHD10	0.000338	turquoise	turquoise
THAP9	ABHD18	0.011331	turquoise	turquoise
THAP9	ABHD2	2.55e-06	turquoise	turquoise
THAP9	ABHD3	2.09e-06	turquoise	turquoise
THAP9	ABHD4	2.91e-05	turquoise	turquoise
THAP9	ABHD5	0.001412	turquoise	turquoise
THAP9	ABI2	0.002134	turquoise	turquoise
THAP9	ABL1	0.000533	turquoise	turquoise
THAP9	ABR	8.44e-05	turquoise	turquoise
THAP9	ABRAXAS1	0.00512	turquoise	turquoise
THAP9	ABRAXAS2	0.002243	turquoise	turquoise
THAP9	ACACA	3.5e-05	turquoise	turquoise
THAP9	ACAD8	1.93e-06	turquoise	turquoise
THAP9	ACADM	0.000534	turquoise	turquoise
THAP9	ACAP2	0.004774	turquoise	turquoise
THAP9	ACAT1	7.14e-06	turquoise	turquoise
THAP9	ACBD5	0.001294	turquoise	turquoise
THAP9	ACLY	0.000268	turquoise	turquoise
THAP9	ACSL3	8.6e-05	turquoise	turquoise
THAP9	ACTR10	0.001608	turquoise	turquoise
THAP9	ACTR8	0.004781	turquoise	turquoise
THAP9	ACVR2B	0.001555	turquoise	turquoise
THAP9	ADAM10	0.001874	turquoise	turquoise
THAP9	ADAM22	4.21e-05	turquoise	turquoise
THAP9	ADGRV1	1.88e-06	turquoise	turquoise
THAP9	ADNP	0.005961	turquoise	turquoise
THAP9	ADNP2	0.002332	turquoise	turquoise
THAP9	AFF1	0.004516	turquoise	turquoise
THAP9	AFF4	0.009312	turquoise	turquoise
THAP9	AFTPH	0.008783	turquoise	turquoise
THAP9	AGGF1	0.007443	turquoise	turquoise
THAP9	AGL	1.06e-06	turquoise	turquoise
THAP9	AGO3	0.001641	turquoise	turquoise
THAP9	AGO4	0.001865	turquoise	turquoise
THAP9	AGPAT3	0.00026	turquoise	turquoise
THAP9	AGPS	7.24e-05	turquoise	turquoise
THAP9	AHCYL1	0.001063	turquoise	turquoise
THAP9	AHCYL2	0.000601	turquoise	turquoise
THAP9	AHI1	7.53e-05	turquoise	turquoise
THAP9	AHNAK	0.000682	turquoise	turquoise
THAP9	AJUBA	1.84e-06	turquoise	turquoise
THAP9	AK3	0.000384	turquoise	turquoise
THAP9	AKAP10	0.001244	turquoise	turquoise
THAP9	AKAP11	0.00438	turquoise	turquoise
THAP9	AKAP5	6.48e-06	turquoise	turquoise
THAP9	AKAP9	0.000758	turquoise	turquoise
THAP9	ALDH6A1	0.000372	turquoise	turquoise
THAP9	ALG10	0.001092	turquoise	turquoise
THAP9	ALG10B	0.001909	turquoise	turquoise
THAP9	ALG11	0.000277	turquoise	turquoise
THAP9	ALG2	0.000856	turquoise	turquoise
THAP9	ALG9	0.001193	turquoise	turquoise
THAP9	ALKBH8	0.000819	turquoise	turquoise
THAP9	ALMS1	0.003514	turquoise	turquoise
THAP9	ALPK1	0.000382	turquoise	turquoise
THAP9	ALS2	0.008472	turquoise	turquoise
THAP9	AMBRA1	0.001077	turquoise	turquoise
THAP9	AMMECR1L	0.003616	turquoise	turquoise
THAP9	ANAPC4	0.003748	turquoise	turquoise
THAP9	ANGEL1	0.000714	turquoise	turquoise
THAP9	ANK3	2.4e-05	turquoise	turquoise
THAP9	ANKFY1	0.0047	turquoise	turquoise
THAP9	ANKIB1	0.006539	turquoise	turquoise
THAP9	ANKMY2	0.000258	turquoise	turquoise
THAP9	ANKRD12	0.005671	turquoise	turquoise
THAP9	ANKRD13C	0.005732	turquoise	turquoise
THAP9	ANKRD17	0.005558	turquoise	turquoise
THAP9	ANKRD28	0.001245	turquoise	turquoise
THAP9	ANKRD49	0.000367	turquoise	turquoise
THAP9	ANKRD52	0.000841	turquoise	turquoise
THAP9	ANKS1B	7.53e-05	turquoise	turquoise
THAP9	ANO6	0.00144	turquoise	turquoise
THAP9	ANOS1	9.11e-06	turquoise	turquoise
THAP9	ANXA7	0.000255	turquoise	turquoise
THAP9	AP1AR	0.005743	turquoise	turquoise
THAP9	AP2B1	0.000476	turquoise	turquoise
THAP9	AP2B1P1	4.19e-07	turquoise	turquoise
THAP9	AP3B1	0.004192	turquoise	turquoise
THAP9	AP3M1	0.000106	turquoise	turquoise
THAP9	AP4E1	0.000907	turquoise	turquoise
THAP9	AP4S1	0.000105	turquoise	turquoise
THAP9	AP5M1	0.002539	turquoise	turquoise
THAP9	APAF1	0.004776	turquoise	turquoise
THAP9	APC	0.010324	turquoise	turquoise
THAP9	APOOL	0.005016	turquoise	turquoise
THAP9	APPL1	0.007884	turquoise	turquoise
THAP9	APPL2	0.001268	turquoise	turquoise
THAP9	AQR	0.003685	turquoise	turquoise
THAP9	AR	3.41e-05	turquoise	turquoise
THAP9	ARF4	0.000356	turquoise	turquoise
THAP9	ARF6	0.0005	turquoise	turquoise
THAP9	ARFGEF2	0.000963	turquoise	turquoise
THAP9	ARFGEF3	0.000419	turquoise	turquoise
THAP9	ARFIP1	0.008823	turquoise	turquoise
THAP9	ARHGAP1	0.000284	turquoise	turquoise
THAP9	ARHGAP12	0.001197	turquoise	turquoise
THAP9	ARHGAP19	0.000371	turquoise	turquoise
THAP9	ARHGAP29	0.000133	turquoise	turquoise
THAP9	ARHGAP32	0.000186	turquoise	turquoise
THAP9	ARHGAP35	0.000668	turquoise	turquoise
THAP9	ARHGAP5	0.00097	turquoise	turquoise
THAP9	ARHGEF12	0.00206	turquoise	turquoise
THAP9	ARHGEF26	3.88e-05	turquoise	turquoise
THAP9	ARHGEF28	4.07e-05	turquoise	turquoise
THAP9	ARHGEF3	0.000251	turquoise	turquoise
THAP9	ARHGEF6	8.12e-06	turquoise	turquoise
THAP9	ARID1A	0.003058	turquoise	turquoise
THAP9	ARID1B	0.001655	turquoise	turquoise
THAP9	ARID2	0.007819	turquoise	turquoise
THAP9	ARID4A	0.009033	turquoise	turquoise
THAP9	ARID4B	0.003856	turquoise	turquoise
THAP9	ARIH1	0.003201	turquoise	turquoise
THAP9	ARIH2	0.001298	turquoise	turquoise
THAP9	ARL1	0.001135	turquoise	turquoise
THAP9	ARL13B	0.001682	turquoise	turquoise
THAP9	ARL14EP	0.004265	turquoise	turquoise
THAP9	ARL6	0.002436	turquoise	turquoise
THAP9	ARL6IP5	0.000436	turquoise	turquoise
THAP9	ARL8B	0.00206	turquoise	turquoise
THAP9	ARMC9	0.000323	turquoise	turquoise
THAP9	ARMCX2	3.71e-06	turquoise	turquoise
THAP9	ARMCX3	0.000324	turquoise	turquoise
THAP9	ARMCX5	0.001334	turquoise	turquoise
THAP9	ARMH3	0.00221	turquoise	turquoise
THAP9	ARNT	0.00129	turquoise	turquoise
THAP9	ARNTL	0.00072	turquoise	turquoise
THAP9	ARPIN	3.52e-05	turquoise	turquoise
THAP9	ARPIN.AP3S2	6.07e-07	turquoise	NA
THAP9	ARPP19	0.000622	turquoise	turquoise
THAP9	ARSK	0.000269	turquoise	turquoise
THAP9	ASAH1	5.88e-06	turquoise	turquoise
THAP9	ASAH2	0.000218	turquoise	turquoise
THAP9	ASAH2B	0.000197	turquoise	turquoise
THAP9	ASAP2	0.001346	turquoise	turquoise
THAP9	ASB7	0.002144	turquoise	turquoise
THAP9	ASH1L	0.002235	turquoise	turquoise
THAP9	ASPH	1.96e-05	turquoise	turquoise
THAP9	ASTE1	0.00117	turquoise	turquoise
THAP9	ASXL2	0.010573	turquoise	turquoise
THAP9	ATAD1	0.004373	turquoise	turquoise
THAP9	ATF1	0.00511	turquoise	turquoise
THAP9	ATF2	0.003613	turquoise	turquoise
THAP9	ATF6	0.001832	turquoise	turquoise
THAP9	ATF7	0.002205	turquoise	turquoise
THAP9	ATF7IP	0.003422	turquoise	turquoise
THAP9	ATG12	0.001756	turquoise	turquoise
THAP9	ATG13	0.001237	turquoise	turquoise
THAP9	ATG14	0.003068	turquoise	turquoise
THAP9	ATG2B	0.006088	turquoise	turquoise
THAP9	ATG4A	0.000556	turquoise	turquoise
THAP9	ATG7	0.000445	turquoise	turquoise
THAP9	ATL1	1.8e-05	turquoise	turquoise
THAP9	ATL3	0.001539	turquoise	turquoise
THAP9	ATP2B1	0.00115	turquoise	turquoise
THAP9	ATP6AP2	0.000665	turquoise	turquoise
THAP9	ATP6V1A	0.001875	turquoise	turquoise
THAP9	ATP7A	0.001693	turquoise	turquoise
THAP9	ATP8A1	9.93e-06	turquoise	turquoise
THAP9	ATP8B1	0.000367	turquoise	turquoise
THAP9	ATP9B	0.00062	turquoise	turquoise
THAP9	ATPSCKMT	0.00035	turquoise	turquoise
THAP9	ATRN	0.001803	turquoise	turquoise
THAP9	ATRX	0.010686	turquoise	turquoise
THAP9	ATXN1	0.000677	turquoise	turquoise
THAP9	ATXN2	0.004849	turquoise	turquoise
THAP9	ATXN3	0.001454	turquoise	turquoise
THAP9	ATXN7	0.001845	turquoise	turquoise
THAP9	ATXN7L3B	0.000275	turquoise	turquoise
THAP9	AUTS2	7.86e-07	turquoise	turquoise
THAP9	AVL9	0.001885	turquoise	turquoise
THAP9	AZI2	0.004791	turquoise	turquoise
THAP9	B3GALNT1	0.000594	turquoise	turquoise
THAP9	B3GLCT	0.000282	turquoise	turquoise
THAP9	B3GNT2	0.000586	turquoise	turquoise
THAP9	BAG5	0.00075	turquoise	turquoise
THAP9	BAZ2A	0.004286	turquoise	turquoise
THAP9	BAZ2B	0.00335	turquoise	turquoise
THAP9	BBS10	0.003666	turquoise	turquoise
THAP9	BBS12	0.001534	turquoise	turquoise
THAP9	BBS9	0.000926	turquoise	turquoise
THAP9	BBX	0.003602	turquoise	turquoise
THAP9	BCAP29	0.000355	turquoise	turquoise
THAP9	BCKDHB	0.000539	turquoise	turquoise
THAP9	BCL2L11	0.001217	turquoise	turquoise
THAP9	BCLAF1	0.013282	turquoise	turquoise
THAP9	BCLAF1P2	0.000224	turquoise	turquoise
THAP9	BCLAF3	0.002102	turquoise	turquoise
THAP9	BCOR	0.000913	turquoise	turquoise
THAP9	BDKRB2	2.05e-07	turquoise	turquoise
THAP9	BDP1	0.004796	turquoise	turquoise
THAP9	BFAR	0.001681	turquoise	turquoise
THAP9	BHLHB9	0.000492	turquoise	turquoise
THAP9	BHLHE40.AS1	2.9e-06	turquoise	NA
THAP9	BIRC6	0.008602	turquoise	turquoise
THAP9	BLNK	1.47e-05	turquoise	turquoise
THAP9	BMI1	4.18e-05	turquoise	turquoise
THAP9	BMP2K	0.000197	turquoise	turquoise
THAP9	BMPR1A	0.002071	turquoise	turquoise
THAP9	BMPR2	0.005284	turquoise	turquoise
THAP9	BMS1P4.AGAP5	7.28e-05	turquoise	NA
THAP9	BNIP3L	8.47e-05	turquoise	turquoise
THAP9	BOD1L1	0.014964	turquoise	turquoise
THAP9	BRAF	0.001539	turquoise	turquoise
THAP9	BRAP	0.005819	turquoise	turquoise
THAP9	BRCA1	0.000776	turquoise	turquoise
THAP9	BRD3	0.000949	turquoise	turquoise
THAP9	BRI3BP	0.00085	turquoise	turquoise
THAP9	BRPF3	0.001709	turquoise	turquoise
THAP9	BRWD1	0.002147	turquoise	turquoise
THAP9	BRWD3	0.001787	turquoise	turquoise
THAP9	BTAF1	0.0036	turquoise	turquoise
THAP9	BTBD1	0.002232	turquoise	turquoise
THAP9	BTBD10	0.004475	turquoise	turquoise
THAP9	BTBD7	0.004394	turquoise	turquoise
THAP9	BTBD8	0.000601	turquoise	turquoise
THAP9	BTBD9	0.001009	turquoise	turquoise
THAP9	BZW1	0.000495	turquoise	turquoise
THAP9	C10orf88	0.0012	turquoise	turquoise
THAP9	C11orf54	0.000463	turquoise	turquoise
THAP9	C11orf58	0.005365	turquoise	turquoise
THAP9	C12orf29	0.00132	turquoise	turquoise
THAP9	C14orf28	0.000233	turquoise	turquoise
THAP9	C16orf72	0.00385	turquoise	turquoise
THAP9	C18orf25	0.005669	turquoise	turquoise
THAP9	C1D	0.002318	turquoise	turquoise
THAP9	C1GALT1C1	0.000311	turquoise	turquoise
THAP9	C2CD3	2.5e-05	turquoise	turquoise
THAP9	C2CD5	0.000371	turquoise	turquoise
THAP9	C2orf16	0.000478	turquoise	turquoise
THAP9	C2orf42	0.00275	turquoise	turquoise
THAP9	C3orf38	0.004221	turquoise	turquoise
THAP9	C4orf3	0.001088	turquoise	turquoise
THAP9	C4orf33	0.000263	turquoise	turquoise
THAP9	C4orf36	0.001527	turquoise	turquoise
THAP9	C5	0.000269	turquoise	turquoise
THAP9	C5orf15	0.002993	turquoise	turquoise
THAP9	C5orf24	0.010862	turquoise	turquoise
THAP9	C5orf51	0.009212	turquoise	turquoise
THAP9	C6orf120	0.001245	turquoise	turquoise
THAP9	C6orf89	0.001623	turquoise	turquoise
THAP9	C7orf25	0.000592	turquoise	turquoise
THAP9	C9orf64	0.001373	turquoise	turquoise
THAP9	CA5B	1.91e-05	turquoise	turquoise
THAP9	CAAP1	0.000773	turquoise	turquoise
THAP9	CAB39	0.004082	turquoise	turquoise
THAP9	CACUL1	0.002039	turquoise	turquoise
THAP9	CALM1	0.00041	turquoise	turquoise
THAP9	CAMKK2	0.001306	turquoise	turquoise
THAP9	CANX	0.001321	turquoise	turquoise
THAP9	CAP2	2.04e-05	turquoise	turquoise
THAP9	CAPN7	0.000825	turquoise	turquoise
THAP9	CAPRIN1	0.001949	turquoise	turquoise
THAP9	CAPZA2	0.004103	turquoise	turquoise
THAP9	CARNMT1	0.003288	turquoise	turquoise
THAP9	CASD1	1.05e-06	turquoise	turquoise
THAP9	CASK	6.09e-05	turquoise	turquoise
THAP9	CASP7	4.55e-05	turquoise	turquoise
THAP9	CASP8	0.000463	turquoise	turquoise
THAP9	CAST	0.000244	turquoise	turquoise
THAP9	CASTOR2	0.000255	turquoise	turquoise
THAP9	CAT	2.84e-05	turquoise	turquoise
THAP9	CATSPER2P1	6.41e-05	turquoise	turquoise
THAP9	CBFA2T2	0.001718	turquoise	turquoise
THAP9	CBLL1	0.004513	turquoise	turquoise
THAP9	CBWD2	0.001092	turquoise	turquoise
THAP9	CBX5	0.00205	turquoise	turquoise
THAP9	CC2D2A	0.000203	turquoise	turquoise
THAP9	CCAR1	0.007189	turquoise	turquoise
THAP9	CCDC110	0.00012	turquoise	turquoise
THAP9	CCDC121	0.005438	turquoise	turquoise
THAP9	CCDC122	6.03e-05	turquoise	turquoise
THAP9	CCDC149	0.000174	turquoise	turquoise
THAP9	CCDC15	0.000107	turquoise	turquoise
THAP9	CCDC171	0.000825	turquoise	turquoise
THAP9	CCDC186	0.002512	turquoise	turquoise
THAP9	CCDC25	0.000121	turquoise	turquoise
THAP9	CCDC28A	4.87e-05	turquoise	turquoise
THAP9	CCNG1	0.000528	turquoise	turquoise
THAP9	CCNG2	0.000545	turquoise	turquoise
THAP9	CCNI	0.003103	turquoise	turquoise
THAP9	CCNT1	0.012155	turquoise	turquoise
THAP9	CCNT2	0.006833	turquoise	turquoise
THAP9	CCP110	0.0015	turquoise	turquoise
THAP9	CCPG1	0.000893	turquoise	turquoise
THAP9	CD2AP	0.000991	turquoise	turquoise
THAP9	CD302	0.000466	turquoise	turquoise
THAP9	CD44	9.63e-07	turquoise	turquoise
THAP9	CD46	0.00077	turquoise	turquoise
THAP9	CDADC1	0.000384	turquoise	turquoise
THAP9	CDC23	0.005579	turquoise	turquoise
THAP9	CDC27	0.003615	turquoise	turquoise
THAP9	CDC37L1	0.000542	turquoise	turquoise
THAP9	CDC42	0.001616	turquoise	turquoise
THAP9	CDC42BPB	0.00068	turquoise	turquoise
THAP9	CDK13	0.006224	turquoise	turquoise
THAP9	CDK14	0.00018	turquoise	turquoise
THAP9	CDK17	0.001368	turquoise	turquoise
THAP9	CDK5RAP2	0.000733	turquoise	turquoise
THAP9	CDKN2AIP	0.00986	turquoise	turquoise
THAP9	CDON	1.91e-05	turquoise	turquoise
THAP9	CDR2	7.11e-05	turquoise	turquoise
THAP9	CDS1	0.004541	turquoise	turquoise
THAP9	CDS2	0.000523	turquoise	turquoise
THAP9	CDV3	9.76e-05	turquoise	turquoise
THAP9	CDYL2	0.000136	turquoise	turquoise
THAP9	CELF1	0.005317	turquoise	turquoise
THAP9	CENPC	0.017717	turquoise	turquoise
THAP9	CEP104	0.001515	turquoise	turquoise
THAP9	CEP120	0.005311	turquoise	turquoise
THAP9	CEP126	8.4e-07	turquoise	turquoise
THAP9	CEP135	0.004886	turquoise	turquoise
THAP9	CEP162	0.001824	turquoise	turquoise
THAP9	CEP19	0.000155	turquoise	turquoise
THAP9	CEP20	0.001953	turquoise	turquoise
THAP9	CEP290	0.001473	turquoise	turquoise
THAP9	CEP350	0.006818	turquoise	turquoise
THAP9	CEP41	0.001137	turquoise	turquoise
THAP9	CEP44	0.0159	turquoise	turquoise
THAP9	CEP63	0.0025	turquoise	turquoise
THAP9	CEP68	0.001762	turquoise	turquoise
THAP9	CEP83	0.000706	turquoise	turquoise
THAP9	CEP97	0.005003	turquoise	turquoise
THAP9	CEPT1	0.001744	turquoise	turquoise
THAP9	CERS6	0.00143	turquoise	turquoise
THAP9	CERT1	0.003394	turquoise	turquoise
THAP9	CFAP97	0.015843	turquoise	turquoise
THAP9	CGGBP1	0.012426	turquoise	turquoise
THAP9	CHD1	0.000623	turquoise	turquoise
THAP9	CHD2	0.00281	turquoise	turquoise
THAP9	CHD4	0.00224	turquoise	turquoise
THAP9	CHD6	0.003046	turquoise	turquoise
THAP9	CHD8	0.005276	turquoise	turquoise
THAP9	CHD9	0.001154	turquoise	turquoise
THAP9	CHIC1	0.003091	turquoise	turquoise
THAP9	CHM	0.007507	turquoise	turquoise
THAP9	CHMP2B	0.001821	turquoise	turquoise
THAP9	CHMP7	1.03e-05	turquoise	turquoise
THAP9	CHP1	0.000403	turquoise	turquoise
THAP9	CHROMR	0.000234	turquoise	turquoise
THAP9	CHST15	0.000187	turquoise	turquoise
THAP9	CHUK	0.005393	turquoise	turquoise
THAP9	CHURC1	0.000843	turquoise	turquoise
THAP9	CHURC1.FNTB	2.52e-06	turquoise	NA
THAP9	CILK1	0.001516	turquoise	turquoise
THAP9	CIPC	0.001369	turquoise	turquoise
THAP9	CITED2	5.4e-07	turquoise	turquoise
THAP9	CLASP2	0.005071	turquoise	turquoise
THAP9	CLCC1	0.001353	turquoise	turquoise
THAP9	CLCN3	0.004551	turquoise	turquoise
THAP9	CLDN12	0.000825	turquoise	turquoise
THAP9	CLEC16A	0.000204	turquoise	turquoise
THAP9	CLINT1	0.004065	turquoise	turquoise
THAP9	CLIP1	0.002333	turquoise	turquoise
THAP9	CLMN	4.75e-05	turquoise	turquoise
THAP9	CLN5	0.00032	turquoise	turquoise
THAP9	CLN8	7.33e-06	turquoise	turquoise
THAP9	CLOCK	0.0161	turquoise	turquoise
THAP9	CLPX	0.003502	turquoise	turquoise
THAP9	CMTM6	0.000779	turquoise	turquoise
THAP9	CNIH1	0.000996	turquoise	turquoise
THAP9	CNNM4	0.000215	turquoise	turquoise
THAP9	CNOT2	0.000201	turquoise	turquoise
THAP9	CNOT4	0.006839	turquoise	turquoise
THAP9	CNOT6	0.003851	turquoise	turquoise
THAP9	CNOT6L	0.011397	turquoise	turquoise
THAP9	CNOT8	0.001812	turquoise	turquoise
THAP9	CNST	0.003738	turquoise	turquoise
THAP9	CNTF	0.000332	turquoise	turquoise
THAP9	CNTRL	0.00109	turquoise	turquoise
THAP9	COA1	0.000908	turquoise	turquoise
THAP9	COG3	0.000945	turquoise	turquoise
THAP9	COG5	0.002757	turquoise	turquoise
THAP9	COG6	0.001106	turquoise	turquoise
THAP9	COPB1	0.003987	turquoise	turquoise
THAP9	COPG2	0.001112	turquoise	turquoise
THAP9	COPS4	0.011659	turquoise	turquoise
THAP9	COPS8	0.001652	turquoise	turquoise
THAP9	COQ10B	0.000788	turquoise	turquoise
THAP9	CORO2A	0.000145	turquoise	turquoise
THAP9	COX15	0.001751	turquoise	turquoise
THAP9	COX18	0.000293	turquoise	turquoise
THAP9	CPD	0.000187	turquoise	turquoise
THAP9	CPEB3	0.001348	turquoise	turquoise
THAP9	CPEB4	0.00096	turquoise	turquoise
THAP9	CPLANE1	0.001618	turquoise	turquoise
THAP9	CPPED1	3.11e-06	turquoise	turquoise
THAP9	CPSF2	0.002972	turquoise	turquoise
THAP9	CPT1A	2.29e-05	turquoise	turquoise
THAP9	CPT2	0.000408	turquoise	turquoise
THAP9	CRACD	5.75e-06	turquoise	turquoise
THAP9	CRACR2A	2.38e-05	turquoise	turquoise
THAP9	CRBN	0.004722	turquoise	turquoise
THAP9	CREB1	0.020104	turquoise	turquoise
THAP9	CREBBP	0.002141	turquoise	turquoise
THAP9	CREBL2	0.001581	turquoise	turquoise
THAP9	CREBRF	0.003374	turquoise	turquoise
THAP9	CRIM1	9.31e-05	turquoise	turquoise
THAP9	CRK	0.001373	turquoise	turquoise
THAP9	CROT	2.84e-06	turquoise	turquoise
THAP9	CRPPA	7.71e-06	turquoise	turquoise
THAP9	CRTC3	0.000905	turquoise	turquoise
THAP9	CRY1	0.001536	turquoise	turquoise
THAP9	CRYZ	0.000103	turquoise	turquoise
THAP9	CRYZL1	0.001257	turquoise	turquoise
THAP9	CSNK1A1	0.004035	turquoise	turquoise
THAP9	CSNK1G1	0.003229	turquoise	turquoise
THAP9	CSNK1G3	0.008046	turquoise	turquoise
THAP9	CSRNP2	0.001155	turquoise	turquoise
THAP9	CSTF2T	0.001389	turquoise	turquoise
THAP9	CTAGE11P	6.17e-07	turquoise	turquoise
THAP9	CTBP2	3.27e-05	turquoise	turquoise
THAP9	CTBS	0.000694	turquoise	turquoise
THAP9	CTDSP2	0.001004	turquoise	turquoise
THAP9	CTDSPL	0.000435	turquoise	turquoise
THAP9	CTDSPL2	0.008758	turquoise	turquoise
THAP9	CTH	3.73e-06	turquoise	turquoise
THAP9	CTNNA1	0.001103	turquoise	turquoise
THAP9	CTPS2	1.86e-05	turquoise	turquoise
THAP9	CTR9	0.002048	turquoise	turquoise
THAP9	CTSO	0.001102	turquoise	turquoise
THAP9	CUL3	0.013519	turquoise	turquoise
THAP9	CUL4B	0.004631	turquoise	turquoise
THAP9	CUL5	0.004413	turquoise	turquoise
THAP9	CUTALP	0.000311	turquoise	turquoise
THAP9	CWF19L2	0.001201	turquoise	turquoise
THAP9	CXorf38	0.00073	turquoise	turquoise
THAP9	CYB5D1	0.000181	turquoise	turquoise
THAP9	CYB5RL	0.001132	turquoise	turquoise
THAP9	CYFIP1	0.000694	turquoise	turquoise
THAP9	CYP20A1	0.001869	turquoise	turquoise
THAP9	CYP4V2	0.000221	turquoise	turquoise
THAP9	CYSLTR1	1.1e-06	turquoise	turquoise
THAP9	DAAM1	0.000985	turquoise	turquoise
THAP9	DAG1	0.000622	turquoise	turquoise
THAP9	DBT	0.004798	turquoise	turquoise
THAP9	DCAF1	0.007967	turquoise	turquoise
THAP9	DCAF10	8.65e-05	turquoise	turquoise
THAP9	DCAF16	0.002833	turquoise	turquoise
THAP9	DCAF17	0.003946	turquoise	turquoise
THAP9	DCAF5	0.001368	turquoise	turquoise
THAP9	DCLRE1A	0.003604	turquoise	turquoise
THAP9	DCP1A	0.009426	turquoise	turquoise
THAP9	DCP2	0.002258	turquoise	turquoise
THAP9	DCTN5	0.001881	turquoise	turquoise
THAP9	DCTN6	6.65e-06	turquoise	turquoise
THAP9	DCUN1D3	0.000367	turquoise	turquoise
THAP9	DDAH1	0.00071	turquoise	turquoise
THAP9	DDB1	0.000705	turquoise	turquoise
THAP9	DDHD1	0.000711	turquoise	turquoise
THAP9	DDI2	0.003791	turquoise	turquoise
THAP9	DDX24	0.000819	turquoise	turquoise
THAP9	DDX3X	0.013548	turquoise	turquoise
THAP9	DDX46	0.009063	turquoise	turquoise
THAP9	DDX6	0.004193	turquoise	turquoise
THAP9	DENND10	0.001066	turquoise	turquoise
THAP9	DENND11	0.000868	turquoise	turquoise
THAP9	DENND4A	0.00366	turquoise	turquoise
THAP9	DENND4C	0.001355	turquoise	turquoise
THAP9	DENND5A	0.001287	turquoise	turquoise
THAP9	DENND5B	0.000114	turquoise	turquoise
THAP9	DENND6A	0.006414	turquoise	turquoise
THAP9	DEPDC4	0.000853	turquoise	turquoise
THAP9	DET1	0.00069	turquoise	turquoise
THAP9	DHDDS	0.000539	turquoise	turquoise
THAP9	DHFR2	0.001086	turquoise	turquoise
THAP9	DHX15	0.011589	turquoise	turquoise
THAP9	DHX29	0.000764	turquoise	turquoise
THAP9	DHX32	0.000141	turquoise	turquoise
THAP9	DHX8	0.002929	turquoise	turquoise
THAP9	DICER1	0.001115	turquoise	turquoise
THAP9	DIMT1	0.002075	turquoise	turquoise
THAP9	DIP2A	0.000697	turquoise	turquoise
THAP9	DIP2B	0.002857	turquoise	turquoise
THAP9	DIP2C	0.00101	turquoise	turquoise
THAP9	DIPK1A	8.46e-05	turquoise	turquoise
THAP9	DIS3L	0.001294	turquoise	turquoise
THAP9	DISP1	0.000102	turquoise	turquoise
THAP9	DIXDC1	0.000471	turquoise	turquoise
THAP9	DLG5	2.43e-05	turquoise	turquoise
THAP9	DLST	0.000677	turquoise	turquoise
THAP9	DMAC2L	0.000745	turquoise	turquoise
THAP9	DMXL1	0.00611	turquoise	turquoise
THAP9	DMXL2	0.001057	turquoise	turquoise
THAP9	DNAH10	2.31e-05	turquoise	turquoise
THAP9	DNAJB14	0.016803	turquoise	turquoise
THAP9	DNAJB6P1	0.000158	turquoise	turquoise
THAP9	DNAJB9	0.000301	turquoise	turquoise
THAP9	DNAJC10	0.000786	turquoise	turquoise
THAP9	DNAJC13	0.006203	turquoise	turquoise
THAP9	DNAJC14	0.003696	turquoise	turquoise
THAP9	DNAJC16	0.004323	turquoise	turquoise
THAP9	DNAJC21	0.002316	turquoise	turquoise
THAP9	DNAJC24	0.005283	turquoise	turquoise
THAP9	DNAJC25	0.000873	turquoise	turquoise
THAP9	DNAJC27	0.00397	turquoise	turquoise
THAP9	DNAJC28	0.000182	turquoise	turquoise
THAP9	DNAJC3	0.000255	turquoise	turquoise
THAP9	DNAJC3.DT	7.87e-06	turquoise	NA
THAP9	DNMBP	2.27e-05	turquoise	turquoise
THAP9	DOCK1	0.000494	turquoise	turquoise
THAP9	DOCK9	0.001002	turquoise	turquoise
THAP9	DOP1A	0.002342	turquoise	turquoise
THAP9	DPH6	0.000889	turquoise	turquoise
THAP9	DPP8	0.008337	turquoise	turquoise
THAP9	DPY19L1	1.54e-05	turquoise	turquoise
THAP9	DPY19L2P3	3.12e-05	turquoise	turquoise
THAP9	DPY19L3	0.001254	turquoise	turquoise
THAP9	DRAM2	0.000125	turquoise	turquoise
THAP9	DRP2	1.38e-06	turquoise	turquoise
THAP9	DTD2	0.000111	turquoise	turquoise
THAP9	DTWD2	0.001589	turquoise	turquoise
THAP9	DUBR	3.33e-05	turquoise	turquoise
THAP9	DUSP16	0.000128	turquoise	turquoise
THAP9	DUSP19	0.000907	turquoise	turquoise
THAP9	DUSP3	0.000964	turquoise	turquoise
THAP9	DYNC1H1	0.001235	turquoise	turquoise
THAP9	DYNC1I2	0.000666	turquoise	turquoise
THAP9	DYNC1I2P1	0.000225	turquoise	turquoise
THAP9	DYNC1LI1	0.000453	turquoise	turquoise
THAP9	DYNC2H1	0.000105	turquoise	turquoise
THAP9	DYNLT3	0.000364	turquoise	turquoise
THAP9	DYRK1A	0.00726	turquoise	turquoise
THAP9	DZIP3	0.00033	turquoise	turquoise
THAP9	EAF1	0.001324	turquoise	turquoise
THAP9	EBLN3P	0.004085	turquoise	turquoise
THAP9	ECD	0.000252	turquoise	turquoise
THAP9	ECPAS	0.003632	turquoise	turquoise
THAP9	EDA2R	9.35e-06	turquoise	turquoise
THAP9	EDEM1	0.000866	turquoise	turquoise
THAP9	EDEM3	0.000506	turquoise	turquoise
THAP9	EDRF1	0.00035	turquoise	turquoise
THAP9	EEA1	0.005769	turquoise	turquoise
THAP9	EEF1A1P23	2.25e-05	turquoise	turquoise
THAP9	EEF2K	0.000392	turquoise	turquoise
THAP9	EFCAB14	0.00555	turquoise	turquoise
THAP9	EFCAB7	0.002629	turquoise	turquoise
THAP9	EFL1	0.001349	turquoise	turquoise
THAP9	EHD3	9.79e-06	turquoise	turquoise
THAP9	EHHADH	4.26e-05	turquoise	turquoise
THAP9	EIF1AX	0.001601	turquoise	turquoise
THAP9	EIF1B	0.00092	turquoise	turquoise
THAP9	EIF2AK3	0.001232	turquoise	turquoise
THAP9	EIF2AK4	0.0018	turquoise	turquoise
THAP9	EIF2S3B	1.44e-06	turquoise	turquoise
THAP9	EIF3A	0.00145	turquoise	turquoise
THAP9	EIF3C	7.31e-05	turquoise	turquoise
THAP9	EIF4A2	0.000796	turquoise	turquoise
THAP9	EIF4A2P3	2.46e-06	turquoise	turquoise
THAP9	EIF4B	0.001044	turquoise	turquoise
THAP9	EIF4E	0.010217	turquoise	turquoise
THAP9	EIF4E3	0.000439	turquoise	turquoise
THAP9	EIF4G2	0.00205	turquoise	turquoise
THAP9	EIF4G3	0.001479	turquoise	turquoise
THAP9	EIF5	0.001699	turquoise	turquoise
THAP9	ELAPOR2	0.000259	turquoise	turquoise
THAP9	ELF1	0.001271	turquoise	turquoise
THAP9	ELF2	0.017741	turquoise	turquoise
THAP9	ELL2	1.82e-05	turquoise	turquoise
THAP9	ELP1	0.002844	turquoise	turquoise
THAP9	ELP3	7.84e-05	turquoise	turquoise
THAP9	EML1	0.000157	turquoise	turquoise
THAP9	ENTPD4	0.000266	turquoise	turquoise
THAP9	ENTPD7	0.000797	turquoise	turquoise
THAP9	EP400	0.005456	turquoise	turquoise
THAP9	EPB41	0.001679	turquoise	turquoise
THAP9	EPB41L4A	9.65e-05	turquoise	turquoise
THAP9	EPB41L5	0.00139	turquoise	turquoise
THAP9	EPC1	0.005093	turquoise	turquoise
THAP9	EPC2	0.008599	turquoise	turquoise
THAP9	EPG5	0.00379	turquoise	turquoise
THAP9	EPM2AIP1	0.002064	turquoise	turquoise
THAP9	EPS15	0.004531	turquoise	turquoise
THAP9	EPS8	0.000411	turquoise	turquoise
THAP9	ERAP1	0.000447	turquoise	turquoise
THAP9	ERBIN	0.007763	turquoise	turquoise
THAP9	ERCC4	0.003844	turquoise	turquoise
THAP9	ERCC6	0.002525	turquoise	turquoise
THAP9	ERCC6L2	0.007909	turquoise	turquoise
THAP9	ERCC8	0.002737	turquoise	turquoise
THAP9	ERI2	0.0018	turquoise	turquoise
THAP9	ERLEC1	0.001968	turquoise	turquoise
THAP9	ERLIN1	0.001316	turquoise	turquoise
THAP9	ERMAP	0.000238	turquoise	turquoise
THAP9	ERMP1	0.000138	turquoise	turquoise
THAP9	ESD	0.000249	turquoise	turquoise
THAP9	ESYT1	0.000279	turquoise	turquoise
THAP9	ETAA1	0.003302	turquoise	turquoise
THAP9	ETF1	0.003254	turquoise	turquoise
THAP9	ETFDH	0.002318	turquoise	turquoise
THAP9	ETFRF1	3.48e-05	turquoise	turquoise
THAP9	ETNK1	0.000174	turquoise	turquoise
THAP9	EVI5	0.00474	turquoise	turquoise
THAP9	EXOC1	0.011604	turquoise	turquoise
THAP9	EXOC4	0.002026	turquoise	turquoise
THAP9	EXOC5	0.006465	turquoise	turquoise
THAP9	EXOC6	0.000991	turquoise	turquoise
THAP9	EXOC6B	0.00174	turquoise	turquoise
THAP9	EXOC7	0.000914	turquoise	turquoise
THAP9	EXOG	0.000339	turquoise	turquoise
THAP9	EYA3	0.002007	turquoise	turquoise
THAP9	FAF2	0.003982	turquoise	turquoise
THAP9	FAM102B	5.88e-05	turquoise	turquoise
THAP9	FAM111A	0.000582	turquoise	turquoise
THAP9	FAM114A1	0.000424	turquoise	turquoise
THAP9	FAM120A	0.003706	turquoise	turquoise
THAP9	FAM120B	0.000957	turquoise	turquoise
THAP9	FAM120C	0.000405	turquoise	turquoise
THAP9	FAM122A	0.001985	turquoise	turquoise
THAP9	FAM122B	0.000997	turquoise	turquoise
THAP9	FAM122C	7.68e-05	turquoise	turquoise
THAP9	FAM126B	0.008654	turquoise	turquoise
THAP9	FAM13B	0.005733	turquoise	turquoise
THAP9	FAM149B1	0.000861	turquoise	turquoise
THAP9	FAM160B1	0.003378	turquoise	turquoise
THAP9	FAM168A	0.000108	turquoise	turquoise
THAP9	FAM169A	4.41e-05	turquoise	turquoise
THAP9	FAM172A	0.001372	turquoise	turquoise
THAP9	FAM185A	0.000941	turquoise	turquoise
THAP9	FAM193A	0.002668	turquoise	turquoise
THAP9	FAM199X	0.005836	turquoise	turquoise
THAP9	FAM200A	0.002639	turquoise	turquoise
THAP9	FAM204A	0.001518	turquoise	turquoise
THAP9	FAM219B	0.001016	turquoise	turquoise
THAP9	FAM47E.STBD1	0.000256	turquoise	NA
THAP9	FAM66B	1.42e-06	turquoise	turquoise
THAP9	FAM8A1	0.00079	turquoise	turquoise
THAP9	FAM98B	0.001023	turquoise	turquoise
THAP9	FAN1	0.002333	turquoise	turquoise
THAP9	FANCM	0.002581	turquoise	turquoise
THAP9	FAR1	0.001006	turquoise	turquoise
THAP9	FARP2	0.001582	turquoise	turquoise
THAP9	FASTKD3	0.002368	turquoise	turquoise
THAP9	FBXL17	0.002641	turquoise	turquoise
THAP9	FBXL19.AS1	3.13e-05	turquoise	NA
THAP9	FBXL3	0.000891	turquoise	turquoise
THAP9	FBXL4	0.002524	turquoise	turquoise
THAP9	FBXO11	0.009172	turquoise	turquoise
THAP9	FBXO21	0.004854	turquoise	turquoise
THAP9	FBXO25	0.000172	turquoise	turquoise
THAP9	FBXO3	0.0016	turquoise	turquoise
THAP9	FBXO33	0.000958	turquoise	turquoise
THAP9	FBXO34	0.001742	turquoise	turquoise
THAP9	FBXO38	0.005724	turquoise	turquoise
THAP9	FBXO42	0.001964	turquoise	turquoise
THAP9	FBXO8	0.006987	turquoise	turquoise
THAP9	FBXO9	0.001007	turquoise	turquoise
THAP9	FBXW11	0.00778	turquoise	turquoise
THAP9	FBXW2	0.002751	turquoise	turquoise
THAP9	FBXW8	0.001611	turquoise	turquoise
THAP9	FCHO2	0.00535	turquoise	turquoise
THAP9	FCHSD2	0.000452	turquoise	turquoise
THAP9	FECH	0.001115	turquoise	turquoise
THAP9	FEM1B	0.004328	turquoise	turquoise
THAP9	FEM1C	0.000902	turquoise	turquoise
THAP9	FER	0.00323	turquoise	turquoise
THAP9	FEZ2	0.001042	turquoise	turquoise
THAP9	FGD5.AS1	0.000683	turquoise	NA
THAP9	FGD6	3.37e-05	turquoise	turquoise
THAP9	FGF7P6	7.11e-07	turquoise	turquoise
THAP9	FHDC1	0.000127	turquoise	turquoise
THAP9	FICD	0.000201	turquoise	turquoise
THAP9	FIG4	2.44e-06	turquoise	turquoise
THAP9	FKBP15	0.001254	turquoise	turquoise
THAP9	FKTN	0.006341	turquoise	turquoise
THAP9	FMN1	0.000621	turquoise	turquoise
THAP9	FNBP1L	0.000902	turquoise	turquoise
THAP9	FNDC3A	0.001124	turquoise	turquoise
THAP9	FNIP1	0.003325	turquoise	turquoise
THAP9	FNIP2	0.000829	turquoise	turquoise
THAP9	FOXJ2	0.001347	turquoise	turquoise
THAP9	FOXJ3	0.001832	turquoise	turquoise
THAP9	FOXP1	0.000148	turquoise	turquoise
THAP9	FPGT	0.002252	turquoise	turquoise
THAP9	FRK	1.12e-05	turquoise	turquoise
THAP9	FRMD6	5.57e-05	turquoise	turquoise
THAP9	FRRS1	0.000496	turquoise	turquoise
THAP9	FRY	0.000124	turquoise	turquoise
THAP9	FRYL	0.00477	turquoise	turquoise
THAP9	FUBP3	0.006902	turquoise	turquoise
THAP9	FUT10	6.58e-05	turquoise	turquoise
THAP9	FUT11	0.000422	turquoise	turquoise
THAP9	FYCO1	0.000698	turquoise	turquoise
THAP9	FZD3	3.44e-05	turquoise	turquoise
THAP9	G2E3	0.001421	turquoise	turquoise
THAP9	G3BP1	0.001572	turquoise	turquoise
THAP9	G3BP2	0.00535	turquoise	turquoise
THAP9	GAB1	0.003322	turquoise	turquoise
THAP9	GABPA	0.009053	turquoise	turquoise
THAP9	GALC	0.000534	turquoise	turquoise
THAP9	GALNT4	3.35e-05	turquoise	turquoise
THAP9	GANC	0.000652	turquoise	turquoise
THAP9	GAPVD1	0.005639	turquoise	turquoise
THAP9	GAREM1	4.66e-06	turquoise	turquoise
THAP9	GATC	0.002419	turquoise	turquoise
THAP9	GATM	1.27e-06	turquoise	turquoise
THAP9	GBF1	0.001366	turquoise	turquoise
THAP9	GCC1	0.001462	turquoise	turquoise
THAP9	GCC2	0.007627	turquoise	turquoise
THAP9	GCLC	0.000192	turquoise	turquoise
THAP9	GCN1	0.001081	turquoise	turquoise
THAP9	GCOM1	1.4e-06	turquoise	turquoise
THAP9	GEMIN5	0.004628	turquoise	turquoise
THAP9	GFM1	0.002334	turquoise	turquoise
THAP9	GFPT1	0.00016	turquoise	turquoise
THAP9	GGA2	0.000232	turquoise	turquoise
THAP9	GGNBP2	0.003743	turquoise	turquoise
THAP9	GHITM	0.000199	turquoise	turquoise
THAP9	GHR	9.56e-07	turquoise	turquoise
THAP9	GID4	0.001096	turquoise	turquoise
THAP9	GIGYF2	0.009329	turquoise	turquoise
THAP9	GINM1	0.000398	turquoise	turquoise
THAP9	GIT2	0.005567	turquoise	turquoise
THAP9	GK	9.04e-05	turquoise	turquoise
THAP9	GK5	0.000691	turquoise	turquoise
THAP9	GLB1L	3.92e-06	turquoise	turquoise
THAP9	GLCCI1	0.000275	turquoise	turquoise
THAP9	GLCE	0.000196	turquoise	turquoise
THAP9	GLE1	0.001359	turquoise	turquoise
THAP9	GLI3	2.32e-05	turquoise	turquoise
THAP9	GMCL1	0.008517	turquoise	turquoise
THAP9	GMFB	0.004694	turquoise	turquoise
THAP9	GNAQ	0.001692	turquoise	turquoise
THAP9	GNB1	0.000823	turquoise	turquoise
THAP9	GNG10	0.000204	turquoise	turquoise
THAP9	GNG12	0.000303	turquoise	turquoise
THAP9	GNL3LP1	5.03e-05	turquoise	turquoise
THAP9	GNPDA2	0.004203	turquoise	turquoise
THAP9	GNPNAT1	0.000544	turquoise	turquoise
THAP9	GNS	0.000695	turquoise	turquoise
THAP9	GOLGA1	0.001743	turquoise	turquoise
THAP9	GOLGA2	0.000277	turquoise	turquoise
THAP9	GOLGA3	0.000977	turquoise	turquoise
THAP9	GOLGA4	0.003439	turquoise	turquoise
THAP9	GOLGA5	0.001038	turquoise	turquoise
THAP9	GOLGB1	0.005073	turquoise	turquoise
THAP9	GOLM2	0.003808	turquoise	turquoise
THAP9	GORASP1	0.000422	turquoise	turquoise
THAP9	GOSR1	0.002181	turquoise	turquoise
THAP9	GOSR2	0.000614	turquoise	turquoise
THAP9	GPALPP1	0.001458	turquoise	turquoise
THAP9	GPATCH2L	0.005659	turquoise	turquoise
THAP9	GPATCH8	0.008464	turquoise	turquoise
THAP9	GPBP1	0.006225	turquoise	turquoise
THAP9	GPCPD1	3.45e-06	turquoise	turquoise
THAP9	GPD2	0.00048	turquoise	turquoise
THAP9	GPN3	0.002301	turquoise	turquoise
THAP9	GPR107	0.002162	turquoise	turquoise
THAP9	GPR137C	1.69e-05	turquoise	turquoise
THAP9	GPRASP2	6.9e-05	turquoise	turquoise
THAP9	GRAMD1C	0.000313	turquoise	turquoise
THAP9	GRIP1	8.32e-07	turquoise	turquoise
THAP9	GRK3	0.00034	turquoise	turquoise
THAP9	GSK3B	0.004545	turquoise	turquoise
THAP9	GSKIP	0.001257	turquoise	turquoise
THAP9	GSPT1	0.002668	turquoise	turquoise
THAP9	GSTCD	0.001311	turquoise	turquoise
THAP9	GTF2A1	0.007227	turquoise	turquoise
THAP9	GTF2H2C	0.00025	turquoise	turquoise
THAP9	GTF2H3	0.00555	turquoise	turquoise
THAP9	GTF2I	0.004541	turquoise	turquoise
THAP9	GTF2IP1	0.000967	turquoise	turquoise
THAP9	GTF2IP4	0.00145	turquoise	turquoise
THAP9	GTF3C4	0.002779	turquoise	turquoise
THAP9	GTPBP10	0.005311	turquoise	turquoise
THAP9	GUF1	0.003418	turquoise	turquoise
THAP9	GUSBP5	7.28e-07	turquoise	turquoise
THAP9	GXYLT1	0.003651	turquoise	turquoise
THAP9	GZF1	0.00119	turquoise	turquoise
THAP9	H2BC19P	1.12e-05	turquoise	turquoise
THAP9	HACL1	0.000339	turquoise	turquoise
THAP9	HADHB	0.001348	turquoise	turquoise
THAP9	HAT1	0.000863	turquoise	turquoise
THAP9	HAUS3	0.011345	turquoise	turquoise
THAP9	HBP1	0.007278	turquoise	turquoise
THAP9	HCFC2	0.006468	turquoise	turquoise
THAP9	HDGFL3	0.000332	turquoise	turquoise
THAP9	HDHD2	0.001843	turquoise	turquoise
THAP9	HDX	0.000214	turquoise	turquoise
THAP9	HEATR5A	0.001159	turquoise	turquoise
THAP9	HEATR5B	0.011217	turquoise	turquoise
THAP9	HECTD1	0.002002	turquoise	turquoise
THAP9	HECTD2	5.86e-05	turquoise	turquoise
THAP9	HECTD4	0.002772	turquoise	turquoise
THAP9	HECW2	3.01e-05	turquoise	turquoise
THAP9	HELQ	0.020376	turquoise	turquoise
THAP9	HERC1	0.001043	turquoise	turquoise
THAP9	HERC2	0.000966	turquoise	turquoise
THAP9	HERC3	0.000183	turquoise	turquoise
THAP9	HERC4	0.001016	turquoise	turquoise
THAP9	HERPUD2	0.002601	turquoise	turquoise
THAP9	HEXA	8.07e-06	turquoise	turquoise
THAP9	HEXB	0.000199	turquoise	turquoise
THAP9	HFE	3.15e-05	turquoise	turquoise
THAP9	HIBCH	7.79e-05	turquoise	turquoise
THAP9	HIF1AN	0.001248	turquoise	turquoise
THAP9	HIP1	0.0012	turquoise	turquoise
THAP9	HIPK1	0.001488	turquoise	turquoise
THAP9	HIPK2	6.84e-05	turquoise	turquoise
THAP9	HIPK3	0.001884	turquoise	turquoise
THAP9	HIVEP3	0.00011	turquoise	turquoise
THAP9	HK2	1.23e-05	turquoise	turquoise
THAP9	HLCS	0.001391	turquoise	turquoise
THAP9	HMG20A	0.005378	turquoise	turquoise
THAP9	HMGCR	0.001218	turquoise	turquoise
THAP9	HNF4G	6.19e-06	turquoise	turquoise
THAP9	HNMT	0.000111	turquoise	turquoise
THAP9	HNRNPDL	0.007683	turquoise	turquoise
THAP9	HNRNPH2	0.001151	turquoise	turquoise
THAP9	HNRNPK	0.012042	turquoise	turquoise
THAP9	HOOK1	0.001784	turquoise	turquoise
THAP9	HP1BP3	0.001277	turquoise	turquoise
THAP9	HPS3	0.001545	turquoise	turquoise
THAP9	HSPA12A	3.66e-05	turquoise	turquoise
THAP9	HTT	0.000736	turquoise	turquoise
THAP9	HYKK	1.31e-05	turquoise	turquoise
THAP9	IBTK	0.004872	turquoise	turquoise
THAP9	IDE	0.002264	turquoise	turquoise
THAP9	IDH3A	0.000731	turquoise	turquoise
THAP9	IDS	0.000564	turquoise	turquoise
THAP9	IFNA20P	4.43e-05	turquoise	turquoise
THAP9	IFNAR1	0.002168	turquoise	turquoise
THAP9	IFT172	0.000368	turquoise	turquoise
THAP9	IFT74	0.000764	turquoise	turquoise
THAP9	IFT80	0.002144	turquoise	turquoise
THAP9	IFT81	0.002047	turquoise	turquoise
THAP9	IGIP	0.000698	turquoise	turquoise
THAP9	IKZF2	4.28e-06	turquoise	turquoise
THAP9	IKZF4	0.001614	turquoise	turquoise
THAP9	IKZF5	0.002063	turquoise	turquoise
THAP9	IMPACT	0.002535	turquoise	turquoise
THAP9	INIP	0.002384	turquoise	turquoise
THAP9	INO80	0.005907	turquoise	turquoise
THAP9	INO80D	0.005509	turquoise	turquoise
THAP9	INPP4B	0.000224	turquoise	turquoise
THAP9	INPP5A	2.29e-05	turquoise	turquoise
THAP9	INPP5B	0.000436	turquoise	turquoise
THAP9	INTS14	0.001707	turquoise	turquoise
THAP9	INVS	0.001626	turquoise	turquoise
THAP9	IP6K1	0.001214	turquoise	turquoise
THAP9	IPO11	0.007522	turquoise	turquoise
THAP9	IPO7	0.003632	turquoise	turquoise
THAP9	IPP	0.005556	turquoise	turquoise
THAP9	IPPK	0.000891	turquoise	turquoise
THAP9	IQCH.AS1	0.000585	turquoise	NA
THAP9	IQGAP1	0.001253	turquoise	turquoise
THAP9	IQGAP2	1.29e-05	turquoise	turquoise
THAP9	IRAK1BP1	0.000634	turquoise	turquoise
THAP9	IRAK4	0.001225	turquoise	turquoise
THAP9	IREB2	0.00653	turquoise	turquoise
THAP9	IRF2	0.002373	turquoise	turquoise
THAP9	ISCA1	0.002757	turquoise	turquoise
THAP9	ITCH	0.011464	turquoise	turquoise
THAP9	ITGA2	1.98e-05	turquoise	turquoise
THAP9	ITPR1	2.9e-06	turquoise	turquoise
THAP9	ITPRIPL2	7.28e-05	turquoise	turquoise
THAP9	ITSN1	0.000791	turquoise	turquoise
THAP9	ITSN2	0.003713	turquoise	turquoise
THAP9	JADE1	0.002018	turquoise	turquoise
THAP9	JADE3	0.000237	turquoise	turquoise
THAP9	JHY	2.8e-05	turquoise	turquoise
THAP9	JMY	0.00282	turquoise	turquoise
THAP9	KANSL1	0.004076	turquoise	turquoise
THAP9	KANSL3	0.002422	turquoise	turquoise
THAP9	KAT2B	0.000344	turquoise	turquoise
THAP9	KAT6B	2.83e-05	turquoise	turquoise
THAP9	KATNAL1	0.001139	turquoise	turquoise
THAP9	KBTBD2	0.001596	turquoise	turquoise
THAP9	KBTBD3	0.000347	turquoise	turquoise
THAP9	KBTBD4	0.002247	turquoise	turquoise
THAP9	KBTBD6	0.000847	turquoise	turquoise
THAP9	KBTBD7	0.001194	turquoise	turquoise
THAP9	KCNIP4	0.000225	turquoise	turquoise
THAP9	KCTD18	0.004674	turquoise	turquoise
THAP9	KDM2A	5.94e-05	turquoise	turquoise
THAP9	KDM3B	0.010972	turquoise	turquoise
THAP9	KDM6A	0.004039	turquoise	turquoise
THAP9	KDSR	0.001694	turquoise	turquoise
THAP9	KHNYN	0.000569	turquoise	turquoise
THAP9	KIAA0100	0.000268	turquoise	turquoise
THAP9	KIAA0232	0.003763	turquoise	turquoise
THAP9	KIAA0586	0.00364	turquoise	turquoise
THAP9	KIAA0753	0.00136	turquoise	turquoise
THAP9	KIAA0825	9.11e-05	turquoise	turquoise
THAP9	KIAA0895	0.002145	turquoise	turquoise
THAP9	KIAA1109	0.008116	turquoise	turquoise
THAP9	KIAA1143	0.007258	turquoise	turquoise
THAP9	KIAA1217	0.00067	turquoise	turquoise
THAP9	KIAA1328	0.000875	turquoise	turquoise
THAP9	KIAA1958	0.00102	turquoise	turquoise
THAP9	KIAA2026	0.004711	turquoise	turquoise
THAP9	KIDINS220	0.004309	turquoise	turquoise
THAP9	KIF13A	0.0005	turquoise	turquoise
THAP9	KIF16B	9.89e-05	turquoise	turquoise
THAP9	KIF27	0.001475	turquoise	turquoise
THAP9	KIF2A	0.004729	turquoise	turquoise
THAP9	KIF3B	0.002689	turquoise	turquoise
THAP9	KITLG	4.95e-06	turquoise	turquoise
THAP9	KLF3	0.006295	turquoise	turquoise
THAP9	KLF8	1.62e-06	turquoise	turquoise
THAP9	KLHDC10	0.001107	turquoise	turquoise
THAP9	KLHL11	0.001128	turquoise	turquoise
THAP9	KLHL12	0.00124	turquoise	turquoise
THAP9	KLHL18	0.002693	turquoise	turquoise
THAP9	KLHL20	0.004611	turquoise	turquoise
THAP9	KLHL28	0.001698	turquoise	turquoise
THAP9	KLHL42	0.001558	turquoise	turquoise
THAP9	KLHL5	0.00013	turquoise	turquoise
THAP9	KLHL8	0.0061	turquoise	turquoise
THAP9	KLHL9	0.000934	turquoise	turquoise
THAP9	KLLN	3.18e-05	turquoise	turquoise
THAP9	KMT2A	0.002569	turquoise	turquoise
THAP9	KMT2C	0.003409	turquoise	turquoise
THAP9	KMT2D	0.001669	turquoise	turquoise
THAP9	KMT2E	0.006412	turquoise	turquoise
THAP9	KMT5B	0.001452	turquoise	turquoise
THAP9	KPNA1	0.0046	turquoise	turquoise
THAP9	KPNA4P1	9.61e-07	turquoise	turquoise
THAP9	KPNA5	0.000751	turquoise	turquoise
THAP9	KPNA6	0.001889	turquoise	turquoise
THAP9	KRBA2	0.000826	turquoise	turquoise
THAP9	KRCC1	0.000824	turquoise	turquoise
THAP9	KRIT1	0.010197	turquoise	turquoise
THAP9	KRR1	0.001667	turquoise	turquoise
THAP9	KRT8P46	5.01e-05	turquoise	turquoise
THAP9	KSR2	5.15e-05	turquoise	turquoise
THAP9	KTN1	0.001329	turquoise	turquoise
THAP9	KYAT3	0.000346	turquoise	turquoise
THAP9	L2HGDH	0.000826	turquoise	turquoise
THAP9	LACTB	2.8e-06	turquoise	turquoise
THAP9	LAMA3	1.56e-06	turquoise	turquoise
THAP9	LANCL1	0.004026	turquoise	turquoise
THAP9	LARP1	0.002478	turquoise	turquoise
THAP9	LARP1B	0.00503	turquoise	turquoise
THAP9	LARP4	0.007516	turquoise	turquoise
THAP9	LARP7	0.008642	turquoise	turquoise
THAP9	LARS1	0.003603	turquoise	turquoise
THAP9	LARS2	0.001524	turquoise	turquoise
THAP9	LATS1	0.003751	turquoise	turquoise
THAP9	LCA5	0.000747	turquoise	turquoise
THAP9	LCOR	0.003714	turquoise	turquoise
THAP9	LCORL	0.005832	turquoise	turquoise
THAP9	LDAH	0.000184	turquoise	turquoise
THAP9	LDLR	4.47e-07	turquoise	turquoise
THAP9	LDLRAD4	0.000105	turquoise	turquoise
THAP9	LEMD3	0.001602	turquoise	turquoise
THAP9	LEPROTL1	3.85e-05	turquoise	turquoise
THAP9	LGALS8	0.000274	turquoise	turquoise
THAP9	LIG3	0.000502	turquoise	turquoise
THAP9	LIG4	0.001232	turquoise	turquoise
THAP9	LIMA1	0.000689	turquoise	turquoise
THAP9	LIMCH1	2.64e-06	turquoise	turquoise
THAP9	LIMD1	0.001077	turquoise	turquoise
THAP9	LIN52	0.0023	turquoise	turquoise
THAP9	LIN54	0.02727	turquoise	turquoise
THAP9	LIN7C	0.003975	turquoise	turquoise
THAP9	LINC00449	6.88e-06	turquoise	turquoise
THAP9	LINC00863	0.000385	turquoise	turquoise
THAP9	LINC01278	4.68e-05	turquoise	turquoise
THAP9	LINC01291	4.56e-07	turquoise	turquoise
THAP9	LINC01801	2.07e-05	turquoise	turquoise
THAP9	LINC01963	3.19e-05	turquoise	turquoise
THAP9	LINC02035	0.000499	turquoise	turquoise
THAP9	LINC02210	0.000345	turquoise	turquoise
THAP9	LINC02861	5.37e-05	turquoise	turquoise
THAP9	LINS1	0.000836	turquoise	turquoise
THAP9	LIPT1	0.000831	turquoise	turquoise
THAP9	LMAN1	0.001497	turquoise	turquoise
THAP9	LMBR1	0.002304	turquoise	turquoise
THAP9	LMBRD1	0.001349	turquoise	turquoise
THAP9	LMBRD2	0.003528	turquoise	turquoise
THAP9	LMLN	0.00076	turquoise	turquoise
THAP9	LMTK2	0.003384	turquoise	turquoise
THAP9	LNPEP	0.001357	turquoise	turquoise
THAP9	LNPK	0.004196	turquoise	turquoise
THAP9	LNX1	0.000131	turquoise	turquoise
THAP9	LNX2	0.000375	turquoise	turquoise
THAP9	LOC100287896	4.64e-05	turquoise	turquoise
THAP9	LOC100289518	0.000224	turquoise	turquoise
THAP9	LOC100418710	3.51e-06	turquoise	turquoise
THAP9	LOC100419515	0.001027	turquoise	turquoise
THAP9	LOC100420680	9.09e-05	turquoise	turquoise
THAP9	LOC101927060	0.00096	turquoise	turquoise
THAP9	LOC101928063	2.7e-05	turquoise	turquoise
THAP9	LOC101930085	0.000376	turquoise	turquoise
THAP9	LOC105369911	6.09e-05	turquoise	turquoise
THAP9	LOC112268124	4.97e-05	turquoise	turquoise
THAP9	LOC112268389	4.52e-07	turquoise	turquoise
THAP9	LOC152048	9.08e-06	turquoise	turquoise
THAP9	LOC374443	0.000115	turquoise	turquoise
THAP9	LOC645266	3.56e-06	turquoise	turquoise
THAP9	LOC652276	0.000427	turquoise	turquoise
THAP9	LPCAT3	0.000105	turquoise	turquoise
THAP9	LPIN2	6.46e-05	turquoise	turquoise
THAP9	LPP	0.000601	turquoise	turquoise
THAP9	LRBA	0.002392	turquoise	turquoise
THAP9	LRIF1	0.001185	turquoise	turquoise
THAP9	LRIG2	0.003587	turquoise	turquoise
THAP9	LRRC1	0.000357	turquoise	turquoise
THAP9	LRRC37A17P	0.001131	turquoise	turquoise
THAP9	LRRC49	3.74e-07	turquoise	turquoise
THAP9	LRRC8E	0.000336	turquoise	turquoise
THAP9	LRRFIP1	0.001207	turquoise	turquoise
THAP9	LSM11	0.002259	turquoise	turquoise
THAP9	LTA4H	0.000305	turquoise	turquoise
THAP9	LTN1	0.006734	turquoise	turquoise
THAP9	LYRM7	0.003	turquoise	turquoise
THAP9	LYSMD3	0.004659	turquoise	turquoise
THAP9	LYST	0.000412	turquoise	turquoise
THAP9	LZIC	0.004396	turquoise	turquoise
THAP9	LZTFL1	0.00108	turquoise	turquoise
THAP9	MACC1	4.18e-06	turquoise	turquoise
THAP9	MACF1	0.000943	turquoise	turquoise
THAP9	MACO1	0.00135	turquoise	turquoise
THAP9	MAGI1	0.000929	turquoise	turquoise
THAP9	MAGI3	0.000144	turquoise	turquoise
THAP9	MAML1	0.002283	turquoise	turquoise
THAP9	MAML3	0.000524	turquoise	turquoise
THAP9	MAN2A1	0.000247	turquoise	turquoise
THAP9	MANBA	0.000114	turquoise	turquoise
THAP9	MANEA	0.002376	turquoise	turquoise
THAP9	MAP2K4	0.000298	turquoise	turquoise
THAP9	MAP2K4P1	0.000663	turquoise	turquoise
THAP9	MAP2K5	0.000377	turquoise	turquoise
THAP9	MAP3K1	0.000184	turquoise	turquoise
THAP9	MAP3K2	0.01193	turquoise	turquoise
THAP9	MAP3K20	0.000112	turquoise	turquoise
THAP9	MAP3K4	0.000915	turquoise	turquoise
THAP9	MAP3K9	0.000182	turquoise	turquoise
THAP9	MAP4K3	0.005155	turquoise	turquoise
THAP9	MAP4K5	0.001527	turquoise	turquoise
THAP9	MAP7	1.94e-05	turquoise	turquoise
THAP9	MAP9	0.001793	turquoise	turquoise
THAP9	MAPK1IP1L	0.001449	turquoise	turquoise
THAP9	MAPK8	0.002582	turquoise	turquoise
THAP9	MARCHF5	0.002509	turquoise	turquoise
THAP9	MARCHF6	0.003315	turquoise	turquoise
THAP9	MARCHF7	0.008751	turquoise	turquoise
THAP9	MARCHF8	9.27e-05	turquoise	turquoise
THAP9	MARF1	0.006187	turquoise	turquoise
THAP9	MAT2A	0.002963	turquoise	turquoise
THAP9	MAT2B	0.001424	turquoise	turquoise
THAP9	MBD5	0.006137	turquoise	turquoise
THAP9	MBLAC2	0.002767	turquoise	turquoise
THAP9	MBTPS2	0.001827	turquoise	turquoise
THAP9	MCC	4.04e-05	turquoise	turquoise
THAP9	MCM3AP	0.000107	turquoise	turquoise
THAP9	MCM9	0.001604	turquoise	turquoise
THAP9	MCPH1	0.000681	turquoise	turquoise
THAP9	MECP2	0.00103	turquoise	turquoise
THAP9	MED12	0.001707	turquoise	turquoise
THAP9	MED13L	0.0009	turquoise	turquoise
THAP9	MED23	0.000449	turquoise	turquoise
THAP9	MED28	0.003535	turquoise	turquoise
THAP9	MEGF9	0.000113	turquoise	turquoise
THAP9	METTL14	0.014011	turquoise	turquoise
THAP9	METTL15	0.005284	turquoise	turquoise
THAP9	METTL16	0.001113	turquoise	turquoise
THAP9	METTL25	6.57e-05	turquoise	turquoise
THAP9	MFAP3	0.006764	turquoise	turquoise
THAP9	MFN2	0.000527	turquoise	turquoise
THAP9	MFSD11	0.000903	turquoise	turquoise
THAP9	MFSD14A	0.005865	turquoise	turquoise
THAP9	MFSD6	0.000505	turquoise	turquoise
THAP9	MFSD8	0.010625	turquoise	turquoise
THAP9	MGA	0.004866	turquoise	turquoise
THAP9	MGAT4A	3.26e-05	turquoise	turquoise
THAP9	MIA2	0.000251	turquoise	turquoise
THAP9	MIB1	0.005229	turquoise	turquoise
THAP9	MICU1	0.000302	turquoise	turquoise
THAP9	MICU2	0.000417	turquoise	turquoise
THAP9	MID2	0.000582	turquoise	turquoise
THAP9	MIDEAS	0.000768	turquoise	turquoise
THAP9	MIER1	0.006508	turquoise	turquoise
THAP9	MIER3	0.005944	turquoise	turquoise
THAP9	MIGA1	0.001524	turquoise	turquoise
THAP9	MINDY2	0.002666	turquoise	turquoise
THAP9	MINDY3	0.000488	turquoise	turquoise
THAP9	MINPP1	0.001121	turquoise	turquoise
THAP9	MIOS	0.001372	turquoise	turquoise
THAP9	MIPEP	4.54e-06	turquoise	turquoise
THAP9	MIPOL1	6.24e-05	turquoise	turquoise
THAP9	MIR331	0.000159	turquoise	turquoise
THAP9	MIR4263	5.23e-05	turquoise	turquoise
THAP9	MIR621	0.000251	turquoise	turquoise
THAP9	MIS12	0.003084	turquoise	turquoise
THAP9	MKLN1	0.008526	turquoise	turquoise
THAP9	MKLN1.AS	0.000545	turquoise	NA
THAP9	MLEC	0.000398	turquoise	turquoise
THAP9	MLH1	0.001383	turquoise	turquoise
THAP9	MLH3	0.004658	turquoise	turquoise
THAP9	MMAA	0.005069	turquoise	turquoise
THAP9	MMS19	0.001032	turquoise	turquoise
THAP9	MMUT	0.000534	turquoise	turquoise
THAP9	MNS1	1.58e-05	turquoise	turquoise
THAP9	MOB1B	0.003935	turquoise	turquoise
THAP9	MOB4	0.00107	turquoise	turquoise
THAP9	MON2	0.004192	turquoise	turquoise
THAP9	MORC3	0.005383	turquoise	turquoise
THAP9	MOSMO	0.004731	turquoise	turquoise
THAP9	MOSPD2	0.000789	turquoise	turquoise
THAP9	MPDZ	0.001185	turquoise	turquoise
THAP9	MPHOSPH8	0.001326	turquoise	turquoise
THAP9	MPHOSPH9	0.002631	turquoise	turquoise
THAP9	MPP5	0.001404	turquoise	turquoise
THAP9	MPP7	0.000112	turquoise	turquoise
THAP9	MPPE1	0.000541	turquoise	turquoise
THAP9	MR1	0.000204	turquoise	turquoise
THAP9	MRRF	0.000602	turquoise	turquoise
THAP9	MRTFB	0.001051	turquoise	turquoise
THAP9	MSH3	0.005331	turquoise	turquoise
THAP9	MSL2	0.006748	turquoise	turquoise
THAP9	MTA3	0.000811	turquoise	turquoise
THAP9	MTF1	0.002305	turquoise	turquoise
THAP9	MTHFD2L	0.000345	turquoise	turquoise
THAP9	MTM1	0.001337	turquoise	turquoise
THAP9	MTMR10	0.00201	turquoise	turquoise
THAP9	MTMR6	0.001642	turquoise	turquoise
THAP9	MTMR9	0.001221	turquoise	turquoise
THAP9	MTOR	0.002209	turquoise	turquoise
THAP9	MTR	0.003032	turquoise	turquoise
THAP9	MTREX	0.000817	turquoise	turquoise
THAP9	MTRR	0.000244	turquoise	turquoise
THAP9	MTX3	0.001597	turquoise	turquoise
THAP9	MXD1	5.36e-06	turquoise	turquoise
THAP9	MXI1	5.71e-05	turquoise	turquoise
THAP9	MYEF2	0.001149	turquoise	turquoise
THAP9	MYH10	0.0005	turquoise	turquoise
THAP9	MYLIP	0.000171	turquoise	turquoise
THAP9	MYNN	3.76e-05	turquoise	turquoise
THAP9	MYO5B	0.000141	turquoise	turquoise
THAP9	MYO5C	0.000636	turquoise	turquoise
THAP9	MYO6	0.000822	turquoise	turquoise
THAP9	MYO9A	0.002097	turquoise	turquoise
THAP9	MYOF	0.000916	turquoise	turquoise
THAP9	MYRIP	4.42e-05	turquoise	turquoise
THAP9	N4BP2	0.00254	turquoise	turquoise
THAP9	NAA16	0.001533	turquoise	turquoise
THAP9	NAA30	0.006204	turquoise	turquoise
THAP9	NAA35	0.004586	turquoise	turquoise
THAP9	NAALADL2	3.39e-06	turquoise	turquoise
THAP9	NADK2	0.001758	turquoise	turquoise
THAP9	NAIP	4.69e-05	turquoise	turquoise
THAP9	NAIPP3	1.11e-05	turquoise	turquoise
THAP9	NAP1L5	6e-06	turquoise	turquoise
THAP9	NAPEPLD	0.003925	turquoise	turquoise
THAP9	NAPG	0.003318	turquoise	turquoise
THAP9	NAV1	3.42e-05	turquoise	turquoise
THAP9	NBAS	0.002026	turquoise	turquoise
THAP9	NBEA	0.000243	turquoise	turquoise
THAP9	NBEAL1	0.001098	turquoise	turquoise
THAP9	NBPF1	6.45e-05	turquoise	turquoise
THAP9	NBPF10	0.000125	turquoise	turquoise
THAP9	NBPF15	4.03e-05	turquoise	turquoise
THAP9	NBPF26	0.000151	turquoise	turquoise
THAP9	NBPF3	0.000631	turquoise	turquoise
THAP9	NBPF9	0.000184	turquoise	turquoise
THAP9	NCBP3	0.001152	turquoise	turquoise
THAP9	NCKAP5	3.07e-05	turquoise	turquoise
THAP9	NCOA1	0.001496	turquoise	turquoise
THAP9	NCOA3	0.001053	turquoise	turquoise
THAP9	NCOA4	0.001034	turquoise	turquoise
THAP9	NCOA6	0.001922	turquoise	turquoise
THAP9	NCOR1	0.001584	turquoise	turquoise
THAP9	NDE1	0.000402	turquoise	turquoise
THAP9	NDFIP2	0.000744	turquoise	turquoise
THAP9	NDST1	0.000296	turquoise	turquoise
THAP9	NDUFS1	0.003961	turquoise	turquoise
THAP9	NEBL	0.000454	turquoise	turquoise
THAP9	NECAP1	0.001791	turquoise	turquoise
THAP9	NEDD1	0.002615	turquoise	turquoise
THAP9	NEDD4	0.000913	turquoise	turquoise
THAP9	NEK1	0.007561	turquoise	turquoise
THAP9	NEK4	0.005698	turquoise	turquoise
THAP9	NEK7	0.002531	turquoise	turquoise
THAP9	NEK9	0.002634	turquoise	turquoise
THAP9	NEMF	0.00622	turquoise	turquoise
THAP9	NEO1	0.000358	turquoise	turquoise
THAP9	NF1	0.00237	turquoise	turquoise
THAP9	NFE2L2	0.001444	turquoise	turquoise
THAP9	NFIA	9.72e-06	turquoise	turquoise
THAP9	NFKB1	0.000555	turquoise	turquoise
THAP9	NFRKB	0.000268	turquoise	turquoise
THAP9	NGLY1	0.001007	turquoise	turquoise
THAP9	NHLRC2	0.006975	turquoise	turquoise
THAP9	NHLRC3	0.001017	turquoise	turquoise
THAP9	NHS	2.09e-05	turquoise	turquoise
THAP9	NIBAN1	1.61e-06	turquoise	turquoise
THAP9	NIN	0.001977	turquoise	turquoise
THAP9	NIPA1	0.001344	turquoise	turquoise
THAP9	NIPBL	0.009845	turquoise	turquoise
THAP9	NME6	0.00161	turquoise	turquoise
THAP9	NMNAT1	0.000788	turquoise	turquoise
THAP9	NMT1	0.001371	turquoise	turquoise
THAP9	NNT	0.000864	turquoise	turquoise
THAP9	NOL4L	0.000842	turquoise	turquoise
THAP9	NOL8	0.003836	turquoise	turquoise
THAP9	NOMO3	0.000113	turquoise	turquoise
THAP9	NORAD	0.001925	turquoise	turquoise
THAP9	NOS1AP	7.61e-06	turquoise	turquoise
THAP9	NPTN	0.000697	turquoise	turquoise
THAP9	NR1D2	0.002651	turquoise	turquoise
THAP9	NR2C1	0.000767	turquoise	turquoise
THAP9	NR2C2	0.003658	turquoise	turquoise
THAP9	NR2F2	3.32e-06	turquoise	turquoise
THAP9	NRDE2	0.00161	turquoise	turquoise
THAP9	NRIP1	0.000425	turquoise	turquoise
THAP9	NSD1	0.004405	turquoise	turquoise
THAP9	NSUN3	0.00684	turquoise	turquoise
THAP9	NT5DC1	0.00021	turquoise	turquoise
THAP9	NT5DC1P2	1.74e-05	turquoise	turquoise
THAP9	NTN4	4.38e-06	turquoise	turquoise
THAP9	NUBPL	0.000885	turquoise	turquoise
THAP9	NUDT4	0.000252	turquoise	turquoise
THAP9	NUFIP2	0.000237	turquoise	turquoise
THAP9	NUMB	0.001553	turquoise	turquoise
THAP9	NUP214	0.002927	turquoise	turquoise
THAP9	NUP58	0.001726	turquoise	turquoise
THAP9	NUP98	0.005233	turquoise	turquoise
THAP9	NUTM2A.AS1	0.000428	turquoise	NA
THAP9	NXPE3	5.14e-05	turquoise	turquoise
THAP9	OCLN	0.000636	turquoise	turquoise
THAP9	OCRL	0.002071	turquoise	turquoise
THAP9	OGA	0.004863	turquoise	turquoise
THAP9	OIP5.AS1	0.00335	turquoise	NA
THAP9	OPHN1	0.000352	turquoise	turquoise
THAP9	OR2A7	1.76e-05	turquoise	turquoise
THAP9	ORC2	0.006571	turquoise	turquoise
THAP9	ORC4	0.00571	turquoise	turquoise
THAP9	OSBP	0.001849	turquoise	turquoise
THAP9	OSBPL10	9.92e-06	turquoise	turquoise
THAP9	OSBPL1A	0.000481	turquoise	turquoise
THAP9	OSBPL6	4.5e-06	turquoise	turquoise
THAP9	OSBPL8	0.000158	turquoise	turquoise
THAP9	OSGEPL1	0.002087	turquoise	turquoise
THAP9	OTUB2	4.9e-05	turquoise	turquoise
THAP9	OTUD1	0.000604	turquoise	turquoise
THAP9	OTUD3	0.000662	turquoise	turquoise
THAP9	OTUD7B	0.000448	turquoise	turquoise
THAP9	PACRGL	0.00347	turquoise	turquoise
THAP9	PAFAH1B1	0.003497	turquoise	turquoise
THAP9	PAFAH2	0.000637	turquoise	turquoise
THAP9	PAIP2B	7.62e-05	turquoise	turquoise
THAP9	PALB2	0.004361	turquoise	turquoise
THAP9	PAN3	0.00128	turquoise	turquoise
THAP9	PANK3	0.002276	turquoise	turquoise
THAP9	PAPOLA	0.006209	turquoise	turquoise
THAP9	PARD3B	0.000888	turquoise	turquoise
THAP9	PARG	0.003978	turquoise	turquoise
THAP9	PARP11	0.000436	turquoise	turquoise
THAP9	PARP16	0.000464	turquoise	turquoise
THAP9	PATJ	0.000442	turquoise	turquoise
THAP9	PAWR	0.00041	turquoise	turquoise
THAP9	PAXIP1	0.000955	turquoise	turquoise
THAP9	PBRM1	0.008854	turquoise	turquoise
THAP9	PBX1	0.000251	turquoise	turquoise
THAP9	PCCA	1.63e-05	turquoise	turquoise
THAP9	PCF11	0.001801	turquoise	turquoise
THAP9	PCGF5	0.001473	turquoise	turquoise
THAP9	PCM1	0.000252	turquoise	turquoise
THAP9	PCNX1	0.00331	turquoise	turquoise
THAP9	PCNX4	0.007223	turquoise	turquoise
THAP9	PCYOX1	0.001438	turquoise	turquoise
THAP9	PDCD6IP	0.005451	turquoise	turquoise
THAP9	PDCD6IPP1	4.02e-07	turquoise	turquoise
THAP9	PDCL	0.002761	turquoise	turquoise
THAP9	PDE12	0.003937	turquoise	turquoise
THAP9	PDIK1L	0.004438	turquoise	turquoise
THAP9	PDLIM5	1.06e-05	turquoise	turquoise
THAP9	PDPK1	0.002414	turquoise	turquoise
THAP9	PDPK2P	2.61e-05	turquoise	turquoise
THAP9	PDS5A	0.017285	turquoise	turquoise
THAP9	PDS5B	0.002133	turquoise	turquoise
THAP9	PDXDC1	0.000588	turquoise	turquoise
THAP9	PDZD8	0.001252	turquoise	turquoise
THAP9	PELO	0.000295	turquoise	turquoise
THAP9	PER2	0.000384	turquoise	turquoise
THAP9	PER3	0.000391	turquoise	turquoise
THAP9	PEX1	0.005332	turquoise	turquoise
THAP9	PFKFB3	3.88e-07	turquoise	turquoise
THAP9	PFKM	2.13e-05	turquoise	turquoise
THAP9	PGAP1	0.000187	turquoise	turquoise
THAP9	PGBD4	0.001051	turquoise	turquoise
THAP9	PGGT1B	0.007418	turquoise	turquoise
THAP9	PHAX	0.005957	turquoise	turquoise
THAP9	PHC1	0.000513	turquoise	turquoise
THAP9	PHC3	0.00501	turquoise	turquoise
THAP9	PHF10	0.001247	turquoise	turquoise
THAP9	PHF12	3.5e-05	turquoise	turquoise
THAP9	PHF2	0.001575	turquoise	turquoise
THAP9	PHF20	0.001329	turquoise	turquoise
THAP9	PHF21A	0.001645	turquoise	turquoise
THAP9	PHF3	0.002464	turquoise	turquoise
THAP9	PHF8	0.000954	turquoise	turquoise
THAP9	PHIP	0.005716	turquoise	turquoise
THAP9	PHKA1	0.00085	turquoise	turquoise
THAP9	PHLDB2	5.8e-06	turquoise	turquoise
THAP9	PI4K2A	0.000197	turquoise	turquoise
THAP9	PIAS1	0.005561	turquoise	turquoise
THAP9	PIAS2	0.001468	turquoise	turquoise
THAP9	PIAS3	8.34e-05	turquoise	turquoise
THAP9	PIBF1	0.001444	turquoise	turquoise
THAP9	PIGF	0.001196	turquoise	turquoise
THAP9	PIGK	0.000769	turquoise	turquoise
THAP9	PIGN	0.001402	turquoise	turquoise
THAP9	PIGS	4.39e-05	turquoise	turquoise
THAP9	PIK3C2A	0.008835	turquoise	turquoise
THAP9	PIK3C2B	0.000154	turquoise	turquoise
THAP9	PIK3C3	0.005233	turquoise	turquoise
THAP9	PIK3R1	1.26e-05	turquoise	turquoise
THAP9	PIK3R4	0.008746	turquoise	turquoise
THAP9	PIKFYVE	0.010894	turquoise	turquoise
THAP9	PINK1.AS	7.76e-05	turquoise	NA
THAP9	PIP4K2C	0.000556	turquoise	turquoise
THAP9	PJA2	0.006307	turquoise	turquoise
THAP9	PKD1L1	2.96e-07	turquoise	turquoise
THAP9	PKN2	0.008886	turquoise	turquoise
THAP9	PKNOX1	0.003645	turquoise	turquoise
THAP9	PKP4	0.001458	turquoise	turquoise
THAP9	PLBD1.AS1	8.65e-06	turquoise	NA
THAP9	PLBD2	0.000365	turquoise	turquoise
THAP9	PLEKHA3	0.003224	turquoise	turquoise
THAP9	PLEKHA5	0.00039	turquoise	turquoise
THAP9	PLEKHA7	0.000454	turquoise	turquoise
THAP9	PLEKHB2	0.001822	turquoise	turquoise
THAP9	PLPP6	0.00041	turquoise	turquoise
THAP9	PLS1	0.000107	turquoise	turquoise
THAP9	PMAIP1	2.51e-06	turquoise	turquoise
THAP9	PMS2	0.003349	turquoise	turquoise
THAP9	PMS2P4	0.000234	turquoise	turquoise
THAP9	PNPLA8	0.004231	turquoise	turquoise
THAP9	PNRC2	0.002148	turquoise	turquoise
THAP9	POC1B	0.001116	turquoise	turquoise
THAP9	POFUT1	0.001309	turquoise	turquoise
THAP9	POGLUT1	0.001815	turquoise	turquoise
THAP9	POLK	0.007154	turquoise	turquoise
THAP9	POLR2A	0.001104	turquoise	turquoise
THAP9	POLR2M	0.003339	turquoise	turquoise
THAP9	PON2	3.65e-05	turquoise	turquoise
THAP9	POT1	0.002335	turquoise	turquoise
THAP9	POT1.AS1	2.84e-06	turquoise	NA
THAP9	POU2F1	0.004702	turquoise	turquoise
THAP9	PPIG	0.009093	turquoise	turquoise
THAP9	PPIL3	0.001089	turquoise	turquoise
THAP9	PPIP5K1P1	2.48e-05	turquoise	turquoise
THAP9	PPIP5K2	0.007546	turquoise	turquoise
THAP9	PPM1A	0.004473	turquoise	turquoise
THAP9	PPM1B	0.008064	turquoise	turquoise
THAP9	PPM1H	3.09e-06	turquoise	turquoise
THAP9	PPP1R12A	0.006183	turquoise	turquoise
THAP9	PPP1R15B	0.001428	turquoise	turquoise
THAP9	PPP1R2	0.000652	turquoise	turquoise
THAP9	PPP1R3B	1.59e-05	turquoise	turquoise
THAP9	PPP1R9A	0.000715	turquoise	turquoise
THAP9	PPP2CB	9.94e-05	turquoise	turquoise
THAP9	PPP2R2A	0.000408	turquoise	turquoise
THAP9	PPP2R5C	0.001297	turquoise	turquoise
THAP9	PPP2R5E	0.004394	turquoise	turquoise
THAP9	PPP3CB	0.001172	turquoise	turquoise
THAP9	PPP4R2	0.00833	turquoise	turquoise
THAP9	PPP4R3A	0.003353	turquoise	turquoise
THAP9	PPP6C	0.001224	turquoise	turquoise
THAP9	PPP6R3	0.000788	turquoise	turquoise
THAP9	PPTC7	0.001436	turquoise	turquoise
THAP9	PPWD1	0.002626	turquoise	turquoise
THAP9	PRCP	5.12e-07	turquoise	turquoise
THAP9	PRDM10	0.010315	turquoise	turquoise
THAP9	PRDM2	0.002529	turquoise	turquoise
THAP9	PRDM4	0.003182	turquoise	turquoise
THAP9	PRELID2	3.64e-05	turquoise	turquoise
THAP9	PREPL	0.008234	turquoise	turquoise
THAP9	PRIMPOL	0.006804	turquoise	turquoise
THAP9	PRKAR2A	0.002024	turquoise	turquoise
THAP9	PRKAR2B	3.24e-05	turquoise	turquoise
THAP9	PRKCE	0.000116	turquoise	turquoise
THAP9	PRKN	1.97e-07	turquoise	turquoise
THAP9	PRLR	0.000382	turquoise	turquoise
THAP9	PRMT9	0.009653	turquoise	turquoise
THAP9	PRORP	0.000646	turquoise	turquoise
THAP9	PROSER3	0.000293	turquoise	turquoise
THAP9	PRPF4B	0.006794	turquoise	turquoise
THAP9	PRPF8	0.000992	turquoise	turquoise
THAP9	PRRC1	0.004629	turquoise	turquoise
THAP9	PRRG4	7.23e-05	turquoise	turquoise
THAP9	PSEN1	0.001541	turquoise	turquoise
THAP9	PSMD5	0.000535	turquoise	turquoise
THAP9	PTAR1	0.002481	turquoise	turquoise
THAP9	PTCD2	0.004184	turquoise	turquoise
THAP9	PTEN	0.000946	turquoise	turquoise
THAP9	PTENP1	0.000228	turquoise	turquoise
THAP9	PTER	0.001284	turquoise	turquoise
THAP9	PTGER3	1.09e-06	turquoise	turquoise
THAP9	PTGES3P4	3.42e-06	turquoise	turquoise
THAP9	PTPDC1	0.001542	turquoise	turquoise
THAP9	PTPN13	0.000672	turquoise	turquoise
THAP9	PTPN3	0.000196	turquoise	turquoise
THAP9	PTPN4	0.007363	turquoise	turquoise
THAP9	PTPN9	0.001415	turquoise	turquoise
THAP9	PTPRG.AS1	8.66e-06	turquoise	NA
THAP9	PTPRJ	0.000128	turquoise	turquoise
THAP9	PUM1	0.009781	turquoise	turquoise
THAP9	PUM2	0.017761	turquoise	turquoise
THAP9	PURA	0.004222	turquoise	turquoise
THAP9	PURB	0.004797	turquoise	turquoise
THAP9	PUS7L	0.003788	turquoise	turquoise
THAP9	PWWP2A	0.005863	turquoise	turquoise
THAP9	PXK	0.001061	turquoise	turquoise
THAP9	PXYLP1	0.000202	turquoise	turquoise
THAP9	PYROXD1	7.48e-05	turquoise	turquoise
THAP9	QRICH1	0.00462	turquoise	turquoise
THAP9	R3HCC1L	0.003025	turquoise	turquoise
THAP9	RAB11A	0.000597	turquoise	turquoise
THAP9	RAB11FIP2	0.007155	turquoise	turquoise
THAP9	RAB14	0.004964	turquoise	turquoise
THAP9	RAB18	0.001235	turquoise	turquoise
THAP9	RAB21	0.000744	turquoise	turquoise
THAP9	RAB27B	0.000328	turquoise	turquoise
THAP9	RAB28	0.003542	turquoise	turquoise
THAP9	RAB2B	0.001877	turquoise	turquoise
THAP9	RAB31	5.03e-06	turquoise	turquoise
THAP9	RAB33B	0.00585	turquoise	turquoise
THAP9	RAB3GAP1	0.001657	turquoise	turquoise
THAP9	RAB5A	0.002639	turquoise	turquoise
THAP9	RABGAP1	0.005035	turquoise	turquoise
THAP9	RABL3	0.001152	turquoise	turquoise
THAP9	RAD50	0.005741	turquoise	turquoise
THAP9	RAD51D	0.000476	turquoise	turquoise
THAP9	RAD9B	0.000188	turquoise	turquoise
THAP9	RALB	0.000201	turquoise	turquoise
THAP9	RALGAPA1	0.004413	turquoise	turquoise
THAP9	RALGAPA1P1	0.002905	turquoise	turquoise
THAP9	RALGAPA2	2.44e-05	turquoise	turquoise
THAP9	RALGPS1	0.001047	turquoise	turquoise
THAP9	RALGPS2	0.000359	turquoise	turquoise
THAP9	RANBP2	0.005458	turquoise	turquoise
THAP9	RANBP6	0.002391	turquoise	turquoise
THAP9	RAP1B	0.000433	turquoise	turquoise
THAP9	RAP2C	6.86e-07	turquoise	turquoise
THAP9	RAP2C.AS1	0.00043	turquoise	NA
THAP9	RAPGEF4	9.68e-06	turquoise	turquoise
THAP9	RAPGEF5	7.33e-05	turquoise	turquoise
THAP9	RAPH1	0.001195	turquoise	turquoise
THAP9	RARS1	0.001685	turquoise	turquoise
THAP9	RASA1	0.00033	turquoise	turquoise
THAP9	RASSF8	2.23e-05	turquoise	turquoise
THAP9	RB1	0.000904	turquoise	turquoise
THAP9	RBAK	0.004945	turquoise	turquoise
THAP9	RBBP6	0.008911	turquoise	turquoise
THAP9	RBBP9	0.000409	turquoise	turquoise
THAP9	RBL2	0.001735	turquoise	turquoise
THAP9	RBM12	0.016652	turquoise	turquoise
THAP9	RBM12B	0.007992	turquoise	turquoise
THAP9	RBM18	0.002495	turquoise	turquoise
THAP9	RBM23	0.001565	turquoise	turquoise
THAP9	RBM25	0.003516	turquoise	turquoise
THAP9	RBM26	0.002228	turquoise	turquoise
THAP9	RBM27	0.011292	turquoise	turquoise
THAP9	RBM3	4.65e-05	turquoise	turquoise
THAP9	RBM41	0.005216	turquoise	turquoise
THAP9	RBM43	0.001151	turquoise	turquoise
THAP9	RBM45	0.004244	turquoise	turquoise
THAP9	RBM47	0.001289	turquoise	turquoise
THAP9	RBPJ	0.007788	turquoise	turquoise
THAP9	RBSN	0.000829	turquoise	turquoise
THAP9	RC3H1	0.002723	turquoise	turquoise
THAP9	RCBTB1	0.001047	turquoise	turquoise
THAP9	RCHY1	0.006477	turquoise	turquoise
THAP9	RCOR1	0.000428	turquoise	turquoise
THAP9	RCOR3	0.000414	turquoise	turquoise
THAP9	REEP3	0.001004	turquoise	turquoise
THAP9	REL	0.001215	turquoise	turquoise
THAP9	RELCH	0.002022	turquoise	turquoise
THAP9	RELL1	0.000245	turquoise	turquoise
THAP9	RERE	0.000572	turquoise	turquoise
THAP9	RESF1	0.000297	turquoise	turquoise
THAP9	REST	0.013115	turquoise	turquoise
THAP9	REV1	0.006268	turquoise	turquoise
THAP9	RFC1	0.012634	turquoise	turquoise
THAP9	RFFL	0.000629	turquoise	turquoise
THAP9	RFK	0.001243	turquoise	turquoise
THAP9	RFX3	9.9e-05	turquoise	turquoise
THAP9	RFX7	0.005939	turquoise	turquoise
THAP9	RGPD3	2.2e-07	turquoise	turquoise
THAP9	RGPD8	0.000565	turquoise	turquoise
THAP9	RHBDD1	0.004659	turquoise	turquoise
THAP9	RHOA	0.000807	turquoise	turquoise
THAP9	RHOBTB1	5.91e-06	turquoise	turquoise
THAP9	RHOT1	0.001166	turquoise	turquoise
THAP9	RIC8B	0.001932	turquoise	turquoise
THAP9	RICTOR	0.005815	turquoise	turquoise
THAP9	RIMKLB	0.000218	turquoise	turquoise
THAP9	RIPK1	0.001407	turquoise	turquoise
THAP9	RLIM	0.0087	turquoise	turquoise
THAP9	RMDN2	0.000263	turquoise	turquoise
THAP9	RMI1	0.001992	turquoise	turquoise
THAP9	RNASEL	0.000795	turquoise	turquoise
THAP9	RNF11	0.000977	turquoise	turquoise
THAP9	RNF111	0.01325	turquoise	turquoise
THAP9	RNF13	0.002022	turquoise	turquoise
THAP9	RNF144B	7.95e-07	turquoise	turquoise
THAP9	RNF146	0.001304	turquoise	turquoise
THAP9	RNF152	4.32e-06	turquoise	turquoise
THAP9	RNF169	0.000357	turquoise	turquoise
THAP9	RNF180	4.36e-05	turquoise	turquoise
THAP9	RNF2	0.000837	turquoise	turquoise
THAP9	RNF20	0.004415	turquoise	turquoise
THAP9	RNF38	0.002814	turquoise	turquoise
THAP9	RNF4	0.003784	turquoise	turquoise
THAP9	RNF41	0.004603	turquoise	turquoise
THAP9	RNF6	0.00112	turquoise	turquoise
THAP9	RNU4.23P	9.68e-06	turquoise	NA
THAP9	RNU6.531P	0.000898	turquoise	NA
THAP9	ROCK1	0.005933	turquoise	turquoise
THAP9	RP2	0.0015	turquoise	turquoise
THAP9	RPAP2	0.002292	turquoise	turquoise
THAP9	RPAP3	0.007998	turquoise	turquoise
THAP9	RPGR	0.00115	turquoise	turquoise
THAP9	RPP14	0.003044	turquoise	turquoise
THAP9	RPRD1A	0.001898	turquoise	turquoise
THAP9	RPS6KA5	0.000649	turquoise	turquoise
THAP9	RPS6KA6	8.09e-05	turquoise	turquoise
THAP9	RRAGB	0.000566	turquoise	turquoise
THAP9	RREB1	0.000993	turquoise	turquoise
THAP9	RRH	0.000102	turquoise	turquoise
THAP9	RRN3	0.002729	turquoise	turquoise
THAP9	RSBN1	0.001131	turquoise	turquoise
THAP9	RSBN1L	0.007665	turquoise	turquoise
THAP9	RSPH3	0.00088	turquoise	turquoise
THAP9	RSRC2	0.00814	turquoise	turquoise
THAP9	RTF1	0.00265	turquoise	turquoise
THAP9	RTN4	0.00058	turquoise	turquoise
THAP9	RTTN	0.000682	turquoise	turquoise
THAP9	RUFY2	0.003893	turquoise	turquoise
THAP9	RUFY3	0.002844	turquoise	turquoise
THAP9	RUNX1	4.15e-05	turquoise	turquoise
THAP9	RWDD2A	0.000127	turquoise	turquoise
THAP9	RWDD4	0.007898	turquoise	turquoise
THAP9	RYBP	0.003399	turquoise	turquoise
THAP9	S100PBP	0.002168	turquoise	turquoise
THAP9	S1PR3	4.93e-06	turquoise	turquoise
THAP9	SACM1L	0.00871	turquoise	turquoise
THAP9	SAMD8	6.64e-06	turquoise	turquoise
THAP9	SAP30L	0.003444	turquoise	turquoise
THAP9	SASH1	2.76e-05	turquoise	turquoise
THAP9	SBDSP1	0.000932	turquoise	turquoise
THAP9	SBF2	0.001261	turquoise	turquoise
THAP9	SCAF11	0.01336	turquoise	turquoise
THAP9	SCAF8	0.008365	turquoise	turquoise
THAP9	SCAI	0.003285	turquoise	turquoise
THAP9	SCAMP1	0.005093	turquoise	turquoise
THAP9	SCAPER	0.001722	turquoise	turquoise
THAP9	SCARB2	0.002009	turquoise	turquoise
THAP9	SCFD1	0.000357	turquoise	turquoise
THAP9	SCO1	0.001385	turquoise	turquoise
THAP9	SCOC	0.004301	turquoise	turquoise
THAP9	SCRN1	4.85e-05	turquoise	turquoise
THAP9	SCRN3	0.002696	turquoise	turquoise
THAP9	SCYL3	0.000924	turquoise	turquoise
THAP9	SDAD1P1	3.58e-05	turquoise	turquoise
THAP9	SEC16A	0.000304	turquoise	turquoise
THAP9	SEC22C	0.002016	turquoise	turquoise
THAP9	SEC23B	0.000798	turquoise	turquoise
THAP9	SEC23IP	0.001364	turquoise	turquoise
THAP9	SEC24A	0.004058	turquoise	turquoise
THAP9	SEC24B	0.019487	turquoise	turquoise
THAP9	SEC24C	0.000475	turquoise	turquoise
THAP9	SEC24D	0.001032	turquoise	turquoise
THAP9	SEC31A	0.005025	turquoise	turquoise
THAP9	SEC62	0.001098	turquoise	turquoise
THAP9	SECISBP2	0.001838	turquoise	turquoise
THAP9	SECISBP2L	0.001296	turquoise	turquoise
THAP9	SEL1L	0.001429	turquoise	turquoise
THAP9	SEMA3C	2.77e-05	turquoise	turquoise
THAP9	SEMA3E	2.69e-07	turquoise	turquoise
THAP9	SENP2	0.002044	turquoise	turquoise
THAP9	SENP6	0.005131	turquoise	turquoise
THAP9	SENP7	0.004767	turquoise	turquoise
THAP9	SENP8	0.000705	turquoise	turquoise
THAP9	SEPSECS	0.006025	turquoise	turquoise
THAP9	SEPTIN10	0.00071	turquoise	turquoise
THAP9	SEPTIN2	0.003478	turquoise	turquoise
THAP9	SEPTIN8	0.000119	turquoise	turquoise
THAP9	SERINC3	0.001832	turquoise	turquoise
THAP9	SERINC5	0.000324	turquoise	turquoise
THAP9	SERP1	0.000163	turquoise	turquoise
THAP9	SESTD1	0.000347	turquoise	turquoise
THAP9	SETBP1	9.49e-05	turquoise	turquoise
THAP9	SETD1B	0.001047	turquoise	turquoise
THAP9	SETD2	0.012411	turquoise	turquoise
THAP9	SETD3	0.00092	turquoise	turquoise
THAP9	SETD7	0.001834	turquoise	turquoise
THAP9	SETDB2	0.001047	turquoise	turquoise
THAP9	SETX	0.007891	turquoise	turquoise
THAP9	SF3B1	0.006714	turquoise	turquoise
THAP9	SFMBT1	0.001665	turquoise	turquoise
THAP9	SGCB	0.000283	turquoise	turquoise
THAP9	SGMS1	0.000206	turquoise	turquoise
THAP9	SGPL1	0.000574	turquoise	turquoise
THAP9	SGPP1	3.11e-05	turquoise	turquoise
THAP9	SH2D4A	1.38e-06	turquoise	turquoise
THAP9	SH3BGRL2	1.06e-05	turquoise	turquoise
THAP9	SH3BP4	5.33e-05	turquoise	turquoise
THAP9	SH3RF1	0.000566	turquoise	turquoise
THAP9	SHLD2	0.003477	turquoise	turquoise
THAP9	SHLD2P1	1.36e-05	turquoise	turquoise
THAP9	SHOC2	0.000484	turquoise	turquoise
THAP9	SHPRH	0.001421	turquoise	turquoise
THAP9	SHQ1	0.001232	turquoise	turquoise
THAP9	SHROOM3	0.000145	turquoise	turquoise
THAP9	SHTN1	0.001305	turquoise	turquoise
THAP9	SIAE	3.26e-06	turquoise	turquoise
THAP9	SIDT1	2.38e-05	turquoise	turquoise
THAP9	SIDT2	5.6e-05	turquoise	turquoise
THAP9	SIK3	8.32e-05	turquoise	turquoise
THAP9	SIN3A	0.005338	turquoise	turquoise
THAP9	SIPA1L1	0.000599	turquoise	turquoise
THAP9	SIRT1	0.003413	turquoise	turquoise
THAP9	SIX4	0.000152	turquoise	turquoise
THAP9	SLAIN2	0.006079	turquoise	turquoise
THAP9	SLC10A7	0.003684	turquoise	turquoise
THAP9	SLC11A2	0.001308	turquoise	turquoise
THAP9	SLC20A1	0.000746	turquoise	turquoise
THAP9	SLC22A23	4.73e-06	turquoise	turquoise
THAP9	SLC23A2	8.7e-05	turquoise	turquoise
THAP9	SLC24A1	0.001367	turquoise	turquoise
THAP9	SLC25A12	5.74e-05	turquoise	turquoise
THAP9	SLC25A15	0.000543	turquoise	turquoise
THAP9	SLC25A16	8.36e-05	turquoise	turquoise
THAP9	SLC25A24	0.001983	turquoise	turquoise
THAP9	SLC25A30	0.000617	turquoise	turquoise
THAP9	SLC25A36	0.00295	turquoise	turquoise
THAP9	SLC25A40	0.006095	turquoise	turquoise
THAP9	SLC25A46	0.008397	turquoise	turquoise
THAP9	SLC2A13	7.99e-06	turquoise	turquoise
THAP9	SLC30A1	0.000119	turquoise	turquoise
THAP9	SLC30A4	0.001071	turquoise	turquoise
THAP9	SLC30A5	0.005503	turquoise	turquoise
THAP9	SLC30A7	0.002807	turquoise	turquoise
THAP9	SLC30A9	0.013227	turquoise	turquoise
THAP9	SLC35A1	2.69e-05	turquoise	turquoise
THAP9	SLC35A3	0.001205	turquoise	turquoise
THAP9	SLC35A5	0.002172	turquoise	turquoise
THAP9	SLC35B3	0.001147	turquoise	turquoise
THAP9	SLC35D1	0.001303	turquoise	turquoise
THAP9	SLC35E1	0.001205	turquoise	turquoise
THAP9	SLC35F5	0.002451	turquoise	turquoise
THAP9	SLC38A1	0.000272	turquoise	turquoise
THAP9	SLC38A2	0.001155	turquoise	turquoise
THAP9	SLC38A9	0.000718	turquoise	turquoise
THAP9	SLC39A10	0.001217	turquoise	turquoise
THAP9	SLC39A9	0.001925	turquoise	turquoise
THAP9	SLC44A1	0.000763	turquoise	turquoise
THAP9	SLC46A3	1.65e-05	turquoise	turquoise
THAP9	SLC49A4	0.0008	turquoise	turquoise
THAP9	SLC4A7	8.06e-06	turquoise	turquoise
THAP9	SLC9A7	2.44e-05	turquoise	turquoise
THAP9	SLF1	0.001669	turquoise	turquoise
THAP9	SLF2	0.006019	turquoise	turquoise
THAP9	SLK	0.007129	turquoise	turquoise
THAP9	SLMAP	0.004794	turquoise	turquoise
THAP9	SLTM	0.001879	turquoise	turquoise
THAP9	SMAD1	0.000908	turquoise	turquoise
THAP9	SMAD2	0.003235	turquoise	turquoise
THAP9	SMAD3	0.000134	turquoise	turquoise
THAP9	SMAD4	0.003745	turquoise	turquoise
THAP9	SMAD5	0.011712	turquoise	turquoise
THAP9	SMAD7	3.92e-05	turquoise	turquoise
THAP9	SMARCA1	1.85e-05	turquoise	turquoise
THAP9	SMARCA2	0.000945	turquoise	turquoise
THAP9	SMARCA5	0.012336	turquoise	turquoise
THAP9	SMARCAD1	0.021879	turquoise	turquoise
THAP9	SMARCC2	0.002068	turquoise	turquoise
THAP9	SMCR8	0.001237	turquoise	turquoise
THAP9	SMG1	0.01067	turquoise	turquoise
THAP9	SMG6	0.000936	turquoise	turquoise
THAP9	SMYD4	0.00108	turquoise	turquoise
THAP9	SNAP23	0.002588	turquoise	turquoise
THAP9	SNAPC3	0.000342	turquoise	turquoise
THAP9	SNIP1	0.003244	turquoise	turquoise
THAP9	SNRK	0.001567	turquoise	turquoise
THAP9	SNRNP48	0.00262	turquoise	turquoise
THAP9	SNW1	0.001196	turquoise	turquoise
THAP9	SNX1	0.000391	turquoise	turquoise
THAP9	SNX13	0.001844	turquoise	turquoise
THAP9	SNX14	0.001193	turquoise	turquoise
THAP9	SNX18	0.001348	turquoise	turquoise
THAP9	SNX19	0.000995	turquoise	turquoise
THAP9	SNX2	0.002903	turquoise	turquoise
THAP9	SNX25	0.001085	turquoise	turquoise
THAP9	SNX30	0.001581	turquoise	turquoise
THAP9	SNX9	0.000769	turquoise	turquoise
THAP9	SOCS4	0.005721	turquoise	turquoise
THAP9	SOCS6	0.000235	turquoise	turquoise
THAP9	SOGA1	0.000904	turquoise	turquoise
THAP9	SON	0.014399	turquoise	turquoise
THAP9	SORL1	9.06e-05	turquoise	turquoise
THAP9	SOS2	0.00184	turquoise	turquoise
THAP9	SOWAHC	2.39e-05	turquoise	turquoise
THAP9	SP1	0.0168	turquoise	turquoise
THAP9	SP3	0.010555	turquoise	turquoise
THAP9	SP4	0.002172	turquoise	turquoise
THAP9	SPART	7.6e-05	turquoise	turquoise
THAP9	SPATA5	0.002996	turquoise	turquoise
THAP9	SPATA6	0.000293	turquoise	turquoise
THAP9	SPATA7	0.000452	turquoise	turquoise
THAP9	SPCS3	0.000632	turquoise	turquoise
THAP9	SPEN	0.003248	turquoise	turquoise
THAP9	SPG11	0.004833	turquoise	turquoise
THAP9	SPICE1	0.000659	turquoise	turquoise
THAP9	SPIN1	0.007142	turquoise	turquoise
THAP9	SPIN3	0.000573	turquoise	turquoise
THAP9	SPIRE1	0.001339	turquoise	turquoise
THAP9	SPOPL	0.001067	turquoise	turquoise
THAP9	SPPL2A	0.00028	turquoise	turquoise
THAP9	SPRED2	0.000349	turquoise	turquoise
THAP9	SPTAN1	0.000442	turquoise	turquoise
THAP9	SPTLC1	0.006035	turquoise	turquoise
THAP9	SPTLC2	0.000167	turquoise	turquoise
THAP9	SPTY2D1	0.006768	turquoise	turquoise
THAP9	SRBD1	0.003355	turquoise	turquoise
THAP9	SRCAP	0.001033	turquoise	turquoise
THAP9	SREK1	0.00488	turquoise	turquoise
THAP9	SRFBP1	0.010773	turquoise	turquoise
THAP9	SRGAP1	0.000116	turquoise	turquoise
THAP9	SRGAP2B	0.00068	turquoise	turquoise
THAP9	SRGAP2C	0.000515	turquoise	turquoise
THAP9	SRGAP3	3.16e-05	turquoise	turquoise
THAP9	SRP54	0.000332	turquoise	turquoise
THAP9	SRPK2	0.0029	turquoise	turquoise
THAP9	SSH2	3.43e-05	turquoise	turquoise
THAP9	ST7	1.23e-05	turquoise	turquoise
THAP9	ST7L	0.00109	turquoise	turquoise
THAP9	STAG2	0.014263	turquoise	turquoise
THAP9	STAM2	0.00693	turquoise	turquoise
THAP9	STARD13	5.88e-05	turquoise	turquoise
THAP9	STARD3NL	0.001202	turquoise	turquoise
THAP9	STAT3	0.000603	turquoise	turquoise
THAP9	STAT5B	0.000396	turquoise	turquoise
THAP9	STIM2	0.001237	turquoise	turquoise
THAP9	STK39	5.18e-05	turquoise	turquoise
THAP9	STOM	2.19e-05	turquoise	turquoise
THAP9	STOX1	2.14e-06	turquoise	turquoise
THAP9	STRADB	0.000217	turquoise	turquoise
THAP9	STRBP	0.00317	turquoise	turquoise
THAP9	STRIP1	0.001136	turquoise	turquoise
THAP9	STRN3	0.000958	turquoise	turquoise
THAP9	STT3B	0.001055	turquoise	turquoise
THAP9	STX12	0.00262	turquoise	turquoise
THAP9	STX17	0.005663	turquoise	turquoise
THAP9	STXBP3	0.003175	turquoise	turquoise
THAP9	STXBP5	0.000137	turquoise	turquoise
THAP9	STYX	0.000842	turquoise	turquoise
THAP9	SUCLA2	0.001825	turquoise	turquoise
THAP9	SUCLG2	0.000541	turquoise	turquoise
THAP9	SUCLG2.AS1	0.000451	turquoise	NA
THAP9	SUDS3	0.004527	turquoise	turquoise
THAP9	SUFU	0.000673	turquoise	turquoise
THAP9	SUGT1	0.00017	turquoise	turquoise
THAP9	SUPT20H	2.89e-05	turquoise	turquoise
THAP9	SUPT6H	0.000127	turquoise	turquoise
THAP9	SUSD1	0.00033	turquoise	turquoise
THAP9	SUSD6	0.000292	turquoise	turquoise
THAP9	SUZ12	0.002679	turquoise	turquoise
THAP9	SVIP	0.001068	turquoise	turquoise
THAP9	SYDE2	6.34e-06	turquoise	turquoise
THAP9	SYNC	2.75e-05	turquoise	turquoise
THAP9	SYNE2	0.000999	turquoise	turquoise
THAP9	SYNJ1	0.002523	turquoise	turquoise
THAP9	SYNJ2	0.000594	turquoise	turquoise
THAP9	SYNJ2BP	0.00153	turquoise	turquoise
THAP9	SYNJ2BP.COX16	1.19e-05	turquoise	NA
THAP9	SYNRG	0.001168	turquoise	turquoise
THAP9	SYPL1	0.00081	turquoise	turquoise
THAP9	TAB3	0.002077	turquoise	turquoise
THAP9	TAF1	0.008261	turquoise	turquoise
THAP9	TAF3	0.000778	turquoise	turquoise
THAP9	TAF9B	0.001662	turquoise	turquoise
THAP9	TANC1	0.000489	turquoise	turquoise
THAP9	TAOK1	0.000355	turquoise	turquoise
THAP9	TAOK3	0.001681	turquoise	turquoise
THAP9	TARS3	0.000234	turquoise	turquoise
THAP9	TASOR	0.012127	turquoise	turquoise
THAP9	TAX1BP1	0.001179	turquoise	turquoise
THAP9	TBC1D12	0.001198	turquoise	turquoise
THAP9	TBC1D14	0.001775	turquoise	turquoise
THAP9	TBC1D15	0.002318	turquoise	turquoise
THAP9	TBC1D19	0.001933	turquoise	turquoise
THAP9	TBC1D5	0.004636	turquoise	turquoise
THAP9	TBC1D8	2.23e-05	turquoise	turquoise
THAP9	TBC1D8B	0.000541	turquoise	turquoise
THAP9	TBCEL	0.002371	turquoise	turquoise
THAP9	TBCK	0.003829	turquoise	turquoise
THAP9	TBK1	0.001812	turquoise	turquoise
THAP9	TBL1XR1	0.000229	turquoise	turquoise
THAP9	TBRG1	0.000228	turquoise	turquoise
THAP9	TCAF1	0.001837	turquoise	turquoise
THAP9	TCAF1P1	0.000612	turquoise	turquoise
THAP9	TCAF2	4.02e-06	turquoise	turquoise
THAP9	TCEAL8	0.000172	turquoise	turquoise
THAP9	TCEANC	0.000914	turquoise	turquoise
THAP9	TCEANC2	0.001598	turquoise	turquoise
THAP9	TCF12	0.006719	turquoise	turquoise
THAP9	TCP11L2	0.001704	turquoise	turquoise
THAP9	TCTN3	0.000646	turquoise	turquoise
THAP9	TEAD1	0.001378	turquoise	turquoise
THAP9	TECPR2	0.00022	turquoise	turquoise
THAP9	TEFM	0.001828	turquoise	turquoise
THAP9	TENT2	0.004082	turquoise	turquoise
THAP9	TEP1	0.000565	turquoise	turquoise
THAP9	TET2	0.003004	turquoise	turquoise
THAP9	TEX9	1.32e-05	turquoise	turquoise
THAP9	TFCP2	0.001639	turquoise	turquoise
THAP9	TFDP2	0.000651	turquoise	turquoise
THAP9	TGFBRAP1	0.003423	turquoise	turquoise
THAP9	TGOLN2	0.003374	turquoise	turquoise
THAP9	THAP2	0.000231	turquoise	turquoise
THAP9	THAP5	0.010947	turquoise	turquoise
THAP9	THAP6	0.010867	turquoise	turquoise
THAP9	THOC2	0.005758	turquoise	turquoise
THAP9	THRAP3	0.008967	turquoise	turquoise
THAP9	THRB	7.44e-05	turquoise	turquoise
THAP9	THUMPD1	0.003191	turquoise	turquoise
THAP9	TIAM1	1.03e-05	turquoise	turquoise
THAP9	TIGD4	0.002366	turquoise	turquoise
THAP9	TIGD7	9.35e-05	turquoise	turquoise
THAP9	TIMM10B	0.002007	turquoise	turquoise
THAP9	TIPARP	6.4e-05	turquoise	turquoise
THAP9	TIRAP	0.000371	turquoise	turquoise
THAP9	TJP1	0.002066	turquoise	turquoise
THAP9	TLCD4	9.13e-06	turquoise	turquoise
THAP9	TLCD4.RWDD3	0.001403	turquoise	NA
THAP9	TLCD5	2.42e-05	turquoise	turquoise
THAP9	TLK1	0.004334	turquoise	turquoise
THAP9	TM2D1	0.00077	turquoise	turquoise
THAP9	TM9SF2	0.00055	turquoise	turquoise
THAP9	TM9SF3	0.004048	turquoise	turquoise
THAP9	TM9SF4	0.001373	turquoise	turquoise
THAP9	TMA16	3.27e-05	turquoise	turquoise
THAP9	TMCC1	0.001519	turquoise	turquoise
THAP9	TMED10	0.000724	turquoise	turquoise
THAP9	TMED5	0.001947	turquoise	turquoise
THAP9	TMED7	0.003529	turquoise	turquoise
THAP9	TMED7.TICAM2	0.000236	turquoise	NA
THAP9	TMED8	0.001948	turquoise	turquoise
THAP9	TMEM106A	1.37e-05	turquoise	turquoise
THAP9	TMEM106B	0.001919	turquoise	turquoise
THAP9	TMEM127	0.001194	turquoise	turquoise
THAP9	TMEM131	0.00304	turquoise	turquoise
THAP9	TMEM135	5.2e-05	turquoise	turquoise
THAP9	TMEM154	1.97e-05	turquoise	turquoise
THAP9	TMEM161B	0.003662	turquoise	turquoise
THAP9	TMEM167A	0.001995	turquoise	turquoise
THAP9	TMEM167B	0.001786	turquoise	turquoise
THAP9	TMEM168	0.003101	turquoise	turquoise
THAP9	TMEM170B	0.000971	turquoise	turquoise
THAP9	TMEM181	0.000134	turquoise	turquoise
THAP9	TMEM184C	0.017495	turquoise	turquoise
THAP9	TMEM185A	0.000866	turquoise	turquoise
THAP9	TMEM19	0.000555	turquoise	turquoise
THAP9	TMEM209	0.004571	turquoise	turquoise
THAP9	TMEM241	0.000658	turquoise	turquoise
THAP9	TMEM245	0.004405	turquoise	turquoise
THAP9	TMEM248	0.001441	turquoise	turquoise
THAP9	TMEM260	0.001492	turquoise	turquoise
THAP9	TMEM263	0.000917	turquoise	turquoise
THAP9	TMEM267	0.000875	turquoise	turquoise
THAP9	TMEM30A	0.001497	turquoise	turquoise
THAP9	TMEM33	0.006713	turquoise	turquoise
THAP9	TMEM50B	0.000379	turquoise	turquoise
THAP9	TMEM87A	0.000983	turquoise	turquoise
THAP9	TMEM87B	0.002283	turquoise	turquoise
THAP9	TMF1	0.006583	turquoise	turquoise
THAP9	TMLHE	0.000906	turquoise	turquoise
THAP9	TMOD3	0.001146	turquoise	turquoise
THAP9	TMTC3	0.001724	turquoise	turquoise
THAP9	TMX1	0.001423	turquoise	turquoise
THAP9	TMX3	0.003011	turquoise	turquoise
THAP9	TNFAIP1	4.84e-05	turquoise	turquoise
THAP9	TNKS	0.001283	turquoise	turquoise
THAP9	TNKS2	0.005091	turquoise	turquoise
THAP9	TNPO1	0.012484	turquoise	turquoise
THAP9	TNRC6A	0.003953	turquoise	turquoise
THAP9	TNRC6C	0.000261	turquoise	turquoise
THAP9	TNS3	0.000218	turquoise	turquoise
THAP9	TOGARAM1	0.002345	turquoise	turquoise
THAP9	TOP1	0.003405	turquoise	turquoise
THAP9	TOP2B	0.003058	turquoise	turquoise
THAP9	TOPORS	0.005937	turquoise	turquoise
THAP9	TOR1A	0.001338	turquoise	turquoise
THAP9	TOR1AIP1	0.002039	turquoise	turquoise
THAP9	TOR1B	0.00087	turquoise	turquoise
THAP9	TOX4	0.00175	turquoise	turquoise
THAP9	TP53BP1	0.003318	turquoise	turquoise
THAP9	TPP1	0.000433	turquoise	turquoise
THAP9	TRAF3IP1	0.001828	turquoise	turquoise
THAP9	TRAF6	0.001455	turquoise	turquoise
THAP9	TRAFD1	0.000214	turquoise	turquoise
THAP9	TRAK1	0.000752	turquoise	turquoise
THAP9	TRAK2	0.000453	turquoise	turquoise
THAP9	TRAPPC11	0.018803	turquoise	turquoise
THAP9	TRAPPC13	0.003629	turquoise	turquoise
THAP9	TRAPPC2	0.000327	turquoise	turquoise
THAP9	TRAPPC6B	0.002232	turquoise	turquoise
THAP9	TRAPPC8	0.005864	turquoise	turquoise
THAP9	TRIM13	0.000748	turquoise	turquoise
THAP9	TRIM23	0.008037	turquoise	turquoise
THAP9	TRIM32	0.001568	turquoise	turquoise
THAP9	TRIM34	0.000153	turquoise	turquoise
THAP9	TRIM35	3.18e-05	turquoise	turquoise
THAP9	TRIM4	0.001643	turquoise	turquoise
THAP9	TRIM44	0.001334	turquoise	turquoise
THAP9	TRIM56	0.000413	turquoise	turquoise
THAP9	TRIM6	3.85e-06	turquoise	turquoise
THAP9	TRIO	0.000893	turquoise	turquoise
THAP9	TRIP11	0.005669	turquoise	turquoise
THAP9	TRIP12	0.010789	turquoise	turquoise
THAP9	TRIP4	0.000668	turquoise	turquoise
THAP9	TRMT10A	0.006607	turquoise	turquoise
THAP9	TRMT1L	0.001672	turquoise	turquoise
THAP9	TRMT2B	0.000733	turquoise	turquoise
THAP9	TRMT5	0.002755	turquoise	turquoise
THAP9	TRPM7	0.001442	turquoise	turquoise
THAP9	TRPS1	0.000619	turquoise	turquoise
THAP9	TRUB1	0.004608	turquoise	turquoise
THAP9	TSC1	0.002948	turquoise	turquoise
THAP9	TSC22D1	1.58e-05	turquoise	turquoise
THAP9	TSGA10	0.000249	turquoise	turquoise
THAP9	TSPYL1	0.000875	turquoise	turquoise
THAP9	TSPYL4	6.09e-05	turquoise	turquoise
THAP9	TSTD2	0.00717	turquoise	turquoise
THAP9	TTBK2	0.003874	turquoise	turquoise
THAP9	TTC17	0.003155	turquoise	turquoise
THAP9	TTC19	0.000612	turquoise	turquoise
THAP9	TTC21B	0.001584	turquoise	turquoise
THAP9	TTC26	0.002177	turquoise	turquoise
THAP9	TTC3	0.001248	turquoise	turquoise
THAP9	TTC30A	0.000928	turquoise	turquoise
THAP9	TTC33	0.002214	turquoise	turquoise
THAP9	TTC37	0.007148	turquoise	turquoise
THAP9	TTC41P	0.000529	turquoise	turquoise
THAP9	TTC5	0.001633	turquoise	turquoise
THAP9	TTC9	6.72e-06	turquoise	turquoise
THAP9	TTI2	6.92e-06	turquoise	turquoise
THAP9	TTLL11	0.000266	turquoise	turquoise
THAP9	TTLL5	0.001475	turquoise	turquoise
THAP9	TUBGCP4	0.001891	turquoise	turquoise
THAP9	TUBGCP5	0.000887	turquoise	turquoise
THAP9	TULP4	0.000778	turquoise	turquoise
THAP9	TUT7	0.003534	turquoise	turquoise
THAP9	TVP23B	0.000354	turquoise	turquoise
THAP9	TVP23C.CDRT4	3.71e-05	turquoise	NA
THAP9	TWF1	0.002067	turquoise	turquoise
THAP9	TWSG1	0.000574	turquoise	turquoise
THAP9	TXLNB	1.3e-06	turquoise	turquoise
THAP9	TXNDC16	0.00028	turquoise	turquoise
THAP9	TYW1	0.002462	turquoise	turquoise
THAP9	TYW1B	6.49e-07	turquoise	turquoise
THAP9	TYW3	0.002857	turquoise	turquoise
THAP9	TYW5	0.005766	turquoise	turquoise
THAP9	UBA5	0.001657	turquoise	turquoise
THAP9	UBA6.AS1	0.003096	turquoise	NA
THAP9	UBE2D3	0.014068	turquoise	turquoise
THAP9	UBE2G1	0.002329	turquoise	turquoise
THAP9	UBE2H	0.001456	turquoise	turquoise
THAP9	UBE2K	0.008799	turquoise	turquoise
THAP9	UBE2Q2	0.001629	turquoise	turquoise
THAP9	UBE3A	0.00375	turquoise	turquoise
THAP9	UBE3B	0.003638	turquoise	turquoise
THAP9	UBE4A	0.003038	turquoise	turquoise
THAP9	UBFD1	0.001931	turquoise	turquoise
THAP9	UBL3	0.000438	turquoise	turquoise
THAP9	UBL7.AS1	0.00058	turquoise	NA
THAP9	UBLCP1	0.001496	turquoise	turquoise
THAP9	UBN1	0.001301	turquoise	turquoise
THAP9	UBN2	0.004425	turquoise	turquoise
THAP9	UBP1	0.001669	turquoise	turquoise
THAP9	UBQLN2	0.003199	turquoise	turquoise
THAP9	UBR1	0.005331	turquoise	turquoise
THAP9	UBR3	0.009917	turquoise	turquoise
THAP9	UBR4	0.002872	turquoise	turquoise
THAP9	UBR7	0.00122	turquoise	turquoise
THAP9	UBTD2	0.001966	turquoise	turquoise
THAP9	UBXN4	0.006949	turquoise	turquoise
THAP9	UBXN8	2.14e-05	turquoise	turquoise
THAP9	UEVLD	0.004153	turquoise	turquoise
THAP9	UFL1	0.002747	turquoise	turquoise
THAP9	UFM1	0.000748	turquoise	turquoise
THAP9	UFSP2	0.003412	turquoise	turquoise
THAP9	UGDH	3.33e-06	turquoise	turquoise
THAP9	UGGT2	0.00051	turquoise	turquoise
THAP9	UHMK1	0.003802	turquoise	turquoise
THAP9	UHRF1BP1	0.00231	turquoise	turquoise
THAP9	UHRF1BP1L	0.006014	turquoise	turquoise
THAP9	UPRT	0.001738	turquoise	turquoise
THAP9	UQCRC2	0.000694	turquoise	turquoise
THAP9	USF3	0.003387	turquoise	turquoise
[truncated: 373 more rows]

## Sheet: CHOL_normal
gene1	gene2	correlation	module1	module2
THAP9	AASDHPPT	0.119674	turquoise	turquoise
THAP9	ABCA2	0.010428	turquoise	turquoise
THAP9	ABCB10	0.086844	turquoise	turquoise
THAP9	ABCB10P4	0.025815	turquoise	turquoise
THAP9	ABCB9	1.88e-05	turquoise	turquoise
THAP9	ABCC3	0.007027	turquoise	turquoise
THAP9	ABCC5.AS1	0.025815	turquoise	NA
THAP9	ABCD1	0.017814	turquoise	turquoise
THAP9	ABCF3	0.048491	turquoise	turquoise
THAP9	ABHD10	0.236768	turquoise	turquoise
THAP9	ABL1	0.000461	turquoise	turquoise
THAP9	ACAD8	0.102532	turquoise	turquoise
THAP9	ACADS	0.007113	turquoise	turquoise
THAP9	ACKR3	0.010458	turquoise	turquoise
THAP9	ACO2	0.152317	turquoise	turquoise
THAP9	ACOT1	0.032664	turquoise	turquoise
THAP9	ACOT12	0.016903	turquoise	turquoise
THAP9	ACOX3	0.033653	turquoise	turquoise
THAP9	ACOXL	0.01816	turquoise	turquoise
THAP9	ACTG1P19	0.012605	turquoise	turquoise
THAP9	ACTL6A	0.03413	turquoise	turquoise
THAP9	ACTP1	0.006618	turquoise	turquoise
THAP9	ACTR10	0.224439	turquoise	turquoise
THAP9	ACTR3B	0.006542	turquoise	turquoise
THAP9	ACVR1C	0.058549	turquoise	turquoise
THAP9	ADAMTS13	0.001727	turquoise	turquoise
THAP9	ADARB1	3.05e-05	turquoise	turquoise
THAP9	ADAT1	0.060963	turquoise	turquoise
THAP9	ADCY6	0.026532	turquoise	turquoise
THAP9	ADCY6.DT	0.022111	turquoise	NA
THAP9	ADCY9	0.041861	turquoise	turquoise
THAP9	ADGB	0.006618	turquoise	turquoise
THAP9	ADGRG5	0.021048	turquoise	turquoise
THAP9	ADH7	0.030712	turquoise	turquoise
THAP9	ADK	0.090832	turquoise	turquoise
THAP9	ADORA2A.AS1	0.002535	turquoise	NA
THAP9	ADSL	0.035191	turquoise	turquoise
THAP9	ADSS1	0.004828	turquoise	turquoise
THAP9	ADSS2	0.023045	turquoise	turquoise
THAP9	AFAP1.AS1	6.56e-06	turquoise	NA
THAP9	AFG1L	0.057506	turquoise	turquoise
THAP9	AFG3L2	0.149956	turquoise	turquoise
THAP9	AGAP4	0.023945	turquoise	turquoise
THAP9	AGO1	0.021478	turquoise	turquoise
THAP9	AGPAT3	0.006409	turquoise	turquoise
THAP9	AIMP1	0.159642	turquoise	turquoise
THAP9	AK1	0.002152	turquoise	turquoise
THAP9	AK2	0.189581	turquoise	turquoise
THAP9	AK3	0.068183	turquoise	turquoise
THAP9	AKAP6	0.089946	turquoise	turquoise
THAP9	AKR7A3	0.010589	turquoise	turquoise
THAP9	AKT2	0.058134	turquoise	turquoise
THAP9	AKTIP	0.028402	turquoise	turquoise
THAP9	ALDH16A1	0.000297	turquoise	turquoise
THAP9	ALDH7A1P1	0.108149	turquoise	turquoise
THAP9	ALDOC	0.012757	turquoise	turquoise
THAP9	ALG10	0.03818	turquoise	turquoise
THAP9	ALG3	0.057808	turquoise	turquoise
THAP9	ALG5	0.026151	turquoise	turquoise
THAP9	ALMS1.IT1	0.035292	turquoise	NA
THAP9	ALOX12	0.000984	turquoise	turquoise
THAP9	AMFR	0.054696	turquoise	turquoise
THAP9	ANAPC13	0.055122	turquoise	turquoise
THAP9	ANAPC7	0.027018	turquoise	turquoise
THAP9	ANGEL1	0.027499	turquoise	turquoise
THAP9	ANGEL2	0.02444	turquoise	turquoise
THAP9	ANGPTL7	0.00185	turquoise	turquoise
THAP9	ANKFY1	0.108048	turquoise	turquoise
THAP9	ANKH	0.011825	turquoise	turquoise
THAP9	ANKRD16	0.003863	turquoise	turquoise
THAP9	ANKRD36BP2	0.000798	turquoise	turquoise
THAP9	ANKRD42	0.006002	turquoise	turquoise
THAP9	ANKRD49	0.004984	turquoise	turquoise
THAP9	ANKUB1	0.01938	turquoise	turquoise
THAP9	ANO1	0.039529	turquoise	turquoise
THAP9	ANP32D	0.025815	turquoise	turquoise
THAP9	ANXA7	0.165661	turquoise	turquoise
THAP9	AP1B1	0.031242	turquoise	turquoise
THAP9	AP1M2P1	0.025815	turquoise	turquoise
THAP9	AP2M1	0.003481	turquoise	turquoise
THAP9	AP2S1	0.005362	turquoise	turquoise
THAP9	AP3B2	0.006673	turquoise	turquoise
THAP9	AP5M1	0.105832	turquoise	turquoise
THAP9	AP5S1	0.070672	turquoise	turquoise
THAP9	APC2	0.016222	turquoise	turquoise
THAP9	APIP	0.01766	turquoise	turquoise
THAP9	APOE	0.032738	turquoise	turquoise
THAP9	APOL1	0.011679	turquoise	turquoise
THAP9	APOL2	0.000758	turquoise	turquoise
THAP9	APRT	0.004352	turquoise	turquoise
THAP9	AREL1	0.036548	turquoise	turquoise
THAP9	ARF3	0.038754	turquoise	turquoise
THAP9	ARF5	0.000754	turquoise	turquoise
THAP9	ARHGAP11A	0.022194	turquoise	turquoise
THAP9	ARHGAP19	7.73e-05	turquoise	turquoise
THAP9	ARHGAP20	0.027494	turquoise	turquoise
THAP9	ARHGEF11	0.0408	turquoise	turquoise
THAP9	ARHGEF18	0.002812	turquoise	turquoise
THAP9	ARHGEF26.AS1	0.000553	turquoise	NA
THAP9	ARHGEF35	9.86e-05	turquoise	turquoise
THAP9	ARHGEF37	0.001242	turquoise	turquoise
THAP9	ARL14EPP1	0.005979	turquoise	turquoise
THAP9	ARL6	0.031539	turquoise	turquoise
THAP9	ARMC1	0.20859	turquoise	turquoise
THAP9	ARMCX5	0.05292	turquoise	turquoise
THAP9	ARNTL2.AS1	0.024567	turquoise	NA
THAP9	ARPC1A	0.00874	turquoise	turquoise
THAP9	ARPC3	0.003397	turquoise	turquoise
THAP9	ARRB1	0.00015	turquoise	turquoise
THAP9	ARRDC4	0.002829	turquoise	turquoise
THAP9	ARV1	0.051414	turquoise	turquoise
THAP9	ASAH2B	0.078785	turquoise	turquoise
THAP9	ASB8	0.095879	turquoise	turquoise
THAP9	ASCC3	0.0225	turquoise	turquoise
THAP9	ASCL1	0.013047	turquoise	turquoise
THAP9	ASPM	0.010831	turquoise	turquoise
THAP9	ASTN2	0.003022	turquoise	turquoise
THAP9	ASTN2.AS1	0.002193	turquoise	NA
THAP9	ATAD1	0.176169	turquoise	turquoise
THAP9	ATAD3A	0.02819	turquoise	turquoise
THAP9	ATAD3C	9.92e-06	turquoise	turquoise
THAP9	ATG3	0.114479	turquoise	turquoise
THAP9	ATG4A	0.129079	turquoise	turquoise
THAP9	ATG9A	0.021568	turquoise	turquoise
THAP9	ATIC	0.025759	turquoise	turquoise
THAP9	ATL3	0.025682	turquoise	turquoise
THAP9	ATP1B1	0.004427	turquoise	turquoise
THAP9	ATP23	0.04722	turquoise	turquoise
THAP9	ATP4A	0.025815	turquoise	turquoise
THAP9	ATP5F1A	0.116863	turquoise	turquoise
THAP9	ATP5F1B	0.213167	turquoise	turquoise
THAP9	ATP5MC3	0.140011	turquoise	turquoise
THAP9	ATP5MF.PTCD1	0.001099	turquoise	NA
THAP9	ATP5MG	0.092841	turquoise	turquoise
THAP9	ATP6	0.000111	turquoise	turquoise
THAP9	ATP6V0D1	0.06444	turquoise	turquoise
THAP9	ATP6V1B2	0.126793	turquoise	turquoise
THAP9	ATP6V1C1	0.044524	turquoise	turquoise
THAP9	ATP6V1D	0.201923	turquoise	turquoise
THAP9	ATP6V1E1	0.037432	turquoise	turquoise
THAP9	ATP6V1H	0.100547	turquoise	turquoise
THAP9	ATP7B	0.142571	turquoise	turquoise
THAP9	ATP8	0.004093	turquoise	turquoise
THAP9	ATP8B5P	0.000198	turquoise	turquoise
THAP9	ATPAF1	0.161754	turquoise	turquoise
THAP9	ATRN	0.046418	turquoise	turquoise
THAP9	ATXN7L3B	0.18628	turquoise	turquoise
THAP9	AUH	0.244014	turquoise	turquoise
THAP9	AVPI1	0.049585	turquoise	turquoise
THAP9	AWAT2	0.007759	turquoise	turquoise
THAP9	B3GAT1	0.002897	turquoise	turquoise
THAP9	B3GNT2	0.0805	turquoise	turquoise
THAP9	B3GNTL1	0.00353	turquoise	turquoise
THAP9	B4GALT2	4.57e-05	turquoise	turquoise
THAP9	BAG1	0.039328	turquoise	turquoise
THAP9	BAHD1	0.000532	turquoise	turquoise
THAP9	BAIAP2	0.009442	turquoise	turquoise
THAP9	BANF1	0.029268	turquoise	turquoise
THAP9	BAP1	0.028257	turquoise	turquoise
THAP9	BCAN	5.96e-05	turquoise	turquoise
THAP9	BCAR3	0.004071	turquoise	turquoise
THAP9	BCKDK	0.027688	turquoise	turquoise
THAP9	BCL2L13	0.123724	turquoise	turquoise
THAP9	BEST3	0.018991	turquoise	turquoise
THAP9	BET1	0.087128	turquoise	turquoise
THAP9	BET1L	0.05848	turquoise	turquoise
THAP9	BICDL1	0.006407	turquoise	turquoise
THAP9	BMI1	0.015175	turquoise	turquoise
THAP9	BMS1P11	0.025815	turquoise	turquoise
THAP9	BNIP3L	0.000408	turquoise	turquoise
THAP9	BNIP3P18	0.025815	turquoise	turquoise
THAP9	BOLA3	0.006048	turquoise	turquoise
THAP9	BOP1	0.004825	turquoise	turquoise
THAP9	BPESC1	0.025815	turquoise	turquoise
THAP9	BPNT1	0.123878	turquoise	turquoise
THAP9	BRCA2	0.003597	turquoise	turquoise
THAP9	BRDT	0.025815	turquoise	turquoise
THAP9	BRF2	0.011315	turquoise	turquoise
THAP9	BRI3BP	0.072258	turquoise	turquoise
THAP9	BRIP1	0.034914	turquoise	turquoise
THAP9	BRIX1P1	0.025815	turquoise	turquoise
THAP9	BSG	0.000326	turquoise	turquoise
THAP9	BTBD10P1	0.025815	turquoise	turquoise
THAP9	BTBD11	0.0251	turquoise	turquoise
THAP9	BTBD6	0.00016	turquoise	turquoise
THAP9	BTBD7	0.030875	turquoise	turquoise
THAP9	BTBD9	0.045751	turquoise	turquoise
THAP9	BTF3L4	0.041348	turquoise	turquoise
THAP9	BTF3P14	0.025815	turquoise	turquoise
THAP9	BTLA	0.000446	turquoise	turquoise
THAP9	BTRC	0.066449	turquoise	turquoise
THAP9	BUB3	0.047091	turquoise	turquoise
THAP9	BUD23	0.033945	turquoise	turquoise
THAP9	C10orf67	0.083844	turquoise	turquoise
THAP9	C11orf1	0.040152	turquoise	turquoise
THAP9	C11orf54	0.110039	turquoise	turquoise
THAP9	C11orf68	3.53e-05	turquoise	turquoise
THAP9	C12orf45	0.054564	turquoise	turquoise
THAP9	C14orf119	0.00023	turquoise	turquoise
THAP9	C16orf71	0.001641	turquoise	turquoise
THAP9	C18orf21	0.020738	turquoise	turquoise
THAP9	C18orf63	0.025815	turquoise	turquoise
THAP9	C19orf12	0.000148	turquoise	turquoise
THAP9	C19orf25	0.007508	turquoise	turquoise
THAP9	C19orf73	0.001034	turquoise	turquoise
THAP9	C1GALT1C1	0.069676	turquoise	turquoise
THAP9	C1orf109	0.018461	turquoise	turquoise
THAP9	C1orf229	0.001154	turquoise	turquoise
THAP9	C1orf87	0.025815	turquoise	turquoise
THAP9	C2orf15	0.000584	turquoise	turquoise
THAP9	C2orf68	0.127029	turquoise	turquoise
THAP9	C2orf78	0.012659	turquoise	turquoise
THAP9	C3orf85	0.037044	turquoise	turquoise
THAP9	C4orf3	0.162574	turquoise	turquoise
THAP9	C4orf33	0.002955	turquoise	turquoise
THAP9	C4orf46	0.002601	turquoise	turquoise
THAP9	C4orf51	0.025815	turquoise	turquoise
THAP9	C5orf15	0.16743	turquoise	turquoise
THAP9	C5orf22	0.07882	turquoise	turquoise
THAP9	C6orf226	0.00534	turquoise	turquoise
THAP9	C6orf62	0.002351	turquoise	turquoise
THAP9	C8orf33	0.027775	turquoise	turquoise
THAP9	C9orf163	0.009181	turquoise	turquoise
THAP9	C9orf40	0.046873	turquoise	turquoise
THAP9	C9orf78	0.157166	turquoise	turquoise
THAP9	CA5BP1	0.004968	turquoise	turquoise
THAP9	CABIN1	0.008855	turquoise	turquoise
THAP9	CABLES1	0.007125	turquoise	turquoise
THAP9	CABLES2	0.005976	turquoise	turquoise
THAP9	CABYR	0.010667	turquoise	turquoise
THAP9	CACHD1	4.33e-05	turquoise	turquoise
THAP9	CALB1	0.001643	turquoise	turquoise
THAP9	CALHM1	0.025815	turquoise	turquoise
THAP9	CALR	0.004439	turquoise	turquoise
THAP9	CAMK1D	0.009782	turquoise	turquoise
THAP9	CAMKK2	0.007443	turquoise	turquoise
THAP9	CAMKMT	0.013749	turquoise	turquoise
THAP9	CAMLG	0.003741	turquoise	turquoise
THAP9	CANX	0.060371	turquoise	turquoise
THAP9	CAPN15	0.001021	turquoise	turquoise
THAP9	CAPNS1	2.84e-05	turquoise	turquoise
THAP9	CAPZB	0.135222	turquoise	turquoise
THAP9	CARMIL1	0.028592	turquoise	turquoise
THAP9	CARS1	0.009091	turquoise	turquoise
THAP9	CARS1.AS1	0.01073	turquoise	NA
THAP9	CASC16	0.025815	turquoise	turquoise
THAP9	CASC20	0.008493	turquoise	turquoise
THAP9	CASKIN2	0.000547	turquoise	turquoise
THAP9	CAVIN4	0.018951	turquoise	turquoise
THAP9	CBARP	0.003089	turquoise	turquoise
THAP9	CBFA2T3	0.014486	turquoise	turquoise
THAP9	CBLL1	0.066348	turquoise	turquoise
THAP9	CBR1	0.035119	turquoise	turquoise
THAP9	CBWD1	0.056117	turquoise	turquoise
THAP9	CBX1	0.01054	turquoise	turquoise
THAP9	CBX3	0.027081	turquoise	turquoise
THAP9	CBX5	0.068283	turquoise	turquoise
THAP9	CCDC107	0.00033	turquoise	turquoise
THAP9	CCDC113	0.017029	turquoise	turquoise
THAP9	CCDC126	0.082075	turquoise	turquoise
THAP9	CCDC138	0.009474	turquoise	turquoise
THAP9	CCDC140	0.025815	turquoise	turquoise
THAP9	CCDC144A	0.006136	turquoise	turquoise
THAP9	CCDC144B	0.153381	turquoise	turquoise
THAP9	CCDC170	0.009626	turquoise	turquoise
THAP9	CCDC171	0.000319	turquoise	turquoise
THAP9	CCDC22	0.105126	turquoise	turquoise
THAP9	CCDC28A	0.119908	turquoise	turquoise
THAP9	CCDC42	0.000898	turquoise	turquoise
THAP9	CCDC58	0.043321	turquoise	turquoise
THAP9	CCDC88C	0.00026	turquoise	turquoise
THAP9	CCNB1	0.000505	turquoise	turquoise
THAP9	CCNF	0.000575	turquoise	turquoise
THAP9	CCNQ	0.009055	turquoise	turquoise
THAP9	CCNYL6	0.007426	turquoise	turquoise
THAP9	CCT6B	0.03506	turquoise	turquoise
THAP9	CCZ1P	0.001883	turquoise	turquoise
THAP9	CD151	0.000303	turquoise	turquoise
THAP9	CD164	0.227802	turquoise	turquoise
THAP9	CD2BP2	0.000131	turquoise	turquoise
THAP9	CD46P1	0.025815	turquoise	turquoise
THAP9	CD99L2	0.047222	turquoise	turquoise
THAP9	CDC14B	0.17798	turquoise	turquoise
THAP9	CDC23	0.129888	turquoise	turquoise
THAP9	CDC37	0.074023	turquoise	turquoise
THAP9	CDC42SE2	0.002141	turquoise	turquoise
THAP9	CDH1	0.028628	turquoise	turquoise
THAP9	CDHR1	0.009307	turquoise	turquoise
THAP9	CDHR4	0.004718	turquoise	turquoise
THAP9	CDIP1	0.007967	turquoise	turquoise
THAP9	CDK17	0.008246	turquoise	turquoise
THAP9	CDK5	0.16886	turquoise	turquoise
THAP9	CDK5RAP2	0.007872	turquoise	turquoise
THAP9	CDK7	0.003356	turquoise	turquoise
THAP9	CDK8	0.109488	turquoise	turquoise
THAP9	CDKL5	0.011503	turquoise	turquoise
THAP9	CEACAM5	0.019142	turquoise	turquoise
THAP9	CEBPA	0.018908	turquoise	turquoise
THAP9	CELF1	0.101271	turquoise	turquoise
THAP9	CELF2.AS1	0.006385	turquoise	NA
THAP9	CENPA	3.97e-07	turquoise	turquoise
THAP9	CENPU	0.010111	turquoise	turquoise
THAP9	CENPW	0.000613	turquoise	turquoise
THAP9	CEP104	0.126546	turquoise	turquoise
THAP9	CEP128	0.004623	turquoise	turquoise
THAP9	CEP164P1	0.0074	turquoise	turquoise
THAP9	CEP250	0.000786	turquoise	turquoise
THAP9	CEP57L1	0.050694	turquoise	turquoise
THAP9	CEP76	0.025974	turquoise	turquoise
THAP9	CERS6.AS1	0.011622	turquoise	NA
THAP9	CFAP99	0.005889	turquoise	turquoise
THAP9	CFC1	0.025815	turquoise	turquoise
THAP9	CGNL1	0.012414	turquoise	turquoise
THAP9	CHCHD3	0.113174	turquoise	turquoise
THAP9	CHD1L	0.060483	turquoise	turquoise
THAP9	CHDH	0.001476	turquoise	turquoise
THAP9	CHID1	0.028594	turquoise	turquoise
THAP9	CHL1.AS1	0.025815	turquoise	NA
THAP9	CHMP5	0.101832	turquoise	turquoise
THAP9	CHRNB3	0.025815	turquoise	turquoise
THAP9	CHST9	0.000176	turquoise	turquoise
THAP9	CISD2	0.05782	turquoise	turquoise
THAP9	CKAP2	0.013064	turquoise	turquoise
THAP9	CKM	4.49e-06	turquoise	turquoise
THAP9	CLASP2	0.146226	turquoise	turquoise
THAP9	CLCN7	0.011873	turquoise	turquoise
THAP9	CLDN34	0.012234	turquoise	turquoise
THAP9	CLEC16A	0.047814	turquoise	turquoise
THAP9	CLIP4	0.001565	turquoise	turquoise
THAP9	CLN6	0.002118	turquoise	turquoise
THAP9	CLN8	0.007251	turquoise	turquoise
THAP9	CLPB	0.010397	turquoise	turquoise
THAP9	CLPTM1	0.05637	turquoise	turquoise
THAP9	CLSPN	0.000102	turquoise	turquoise
THAP9	CLSTN2.AS1	0.025815	turquoise	NA
THAP9	CLTA	0.007378	turquoise	turquoise
THAP9	CLVS2	0.025815	turquoise	turquoise
THAP9	CMC1	0.102736	turquoise	turquoise
THAP9	CMPK2	0.033742	turquoise	turquoise
THAP9	CMSS1	0.148544	turquoise	turquoise
THAP9	CMTR1	0.112423	turquoise	turquoise
THAP9	CNGA4	0.011866	turquoise	turquoise
THAP9	CNGB3	0.000959	turquoise	turquoise
THAP9	CNOT10	0.107878	turquoise	turquoise
THAP9	CNOT6L	0.081005	turquoise	turquoise
THAP9	CNPPD1	0.013512	turquoise	turquoise
THAP9	CNTN5	0.001598	turquoise	turquoise
THAP9	CNTNAP2	0.006585	turquoise	turquoise
THAP9	COA6	0.011476	turquoise	turquoise
THAP9	COA7	0.031365	turquoise	turquoise
THAP9	COBL	0.062407	turquoise	turquoise
THAP9	COCH	0.002767	turquoise	turquoise
THAP9	COG8	0.119161	turquoise	turquoise
THAP9	COLEC10	2.72e-05	turquoise	turquoise
THAP9	COMMD8	0.039635	turquoise	turquoise
THAP9	COMT	0.018654	turquoise	turquoise
THAP9	COP1	0.082067	turquoise	turquoise
THAP9	COPG2	0.065282	turquoise	turquoise
THAP9	COPS7A	0.018319	turquoise	turquoise
THAP9	COPZ1	0.014945	turquoise	turquoise
THAP9	COQ6	0.053618	turquoise	turquoise
THAP9	COQ7	0.179997	turquoise	turquoise
THAP9	COX1	0.010166	turquoise	turquoise
THAP9	COX15	0.212528	turquoise	turquoise
THAP9	COX18	0.124755	turquoise	turquoise
THAP9	COX2	0.000542	turquoise	turquoise
THAP9	COX3	0.003106	turquoise	turquoise
THAP9	COX5A	0.0523	turquoise	turquoise
THAP9	COX7A2	0.02093	turquoise	turquoise
THAP9	CPN2	0.060103	turquoise	turquoise
THAP9	CPNE5	0.000216	turquoise	turquoise
THAP9	CPSF1	0.000112	turquoise	turquoise
THAP9	CPSF2	0.149944	turquoise	turquoise
THAP9	CPSF3	0.085778	turquoise	turquoise
THAP9	CPTP	0.005485	turquoise	turquoise
THAP9	CR1L	0.00045	turquoise	turquoise
THAP9	CRB1	0.007101	turquoise	turquoise
THAP9	CRBN	0.194408	turquoise	turquoise
THAP9	CRIPT	0.040131	turquoise	turquoise
THAP9	CRYAA	0.02925	turquoise	turquoise
THAP9	CRYGN	0.018104	turquoise	turquoise
THAP9	CSMD3	0.003112	turquoise	turquoise
THAP9	CST11	0.025815	turquoise	turquoise
THAP9	CSTB	0.01373	turquoise	turquoise
THAP9	CSTF2T	0.09486	turquoise	turquoise
THAP9	CT55	0.025815	turquoise	turquoise
THAP9	CTC1	0.012099	turquoise	turquoise
THAP9	CTDSP2	0.009868	turquoise	turquoise
THAP9	CTDSPL	0.000434	turquoise	turquoise
THAP9	CTNNA2	0.01363	turquoise	turquoise
THAP9	CTNNBIP1	0.013052	turquoise	turquoise
THAP9	CTNS	0.013042	turquoise	turquoise
THAP9	CTPS1	0.016912	turquoise	turquoise
THAP9	CTSD	0.015215	turquoise	turquoise
THAP9	CXCL10	0.002109	turquoise	turquoise
THAP9	CXCL11	0.002161	turquoise	turquoise
THAP9	CXCL14	7.75e-05	turquoise	turquoise
THAP9	CXCL9	0.00037	turquoise	turquoise
THAP9	CXorf56	0.072469	turquoise	turquoise
THAP9	CYB561A3	0.08225	turquoise	turquoise
THAP9	CYB561D1	7.46e-06	turquoise	turquoise
THAP9	CYB5R2	0.002785	turquoise	turquoise
THAP9	CYB5R3	0.008109	turquoise	turquoise
THAP9	CYCS	0.098326	turquoise	turquoise
THAP9	CYP17A1	0.003761	turquoise	turquoise
THAP9	CYP26B1	7.94e-05	turquoise	turquoise
THAP9	CYP2A7P1	0.019057	turquoise	turquoise
THAP9	CYP4A43P	0.025815	turquoise	turquoise
THAP9	CYP4F2	0.058114	turquoise	turquoise
THAP9	CYP4F22	0.003529	turquoise	turquoise
THAP9	CYP4F8	0.000929	turquoise	turquoise
THAP9	CYP7A1	0.035565	turquoise	turquoise
THAP9	CYSRT1	0.006258	turquoise	turquoise
THAP9	CYTB	0.000223	turquoise	turquoise
THAP9	DAP3	0.140952	turquoise	turquoise
THAP9	DAZAP1	0.000461	turquoise	turquoise
THAP9	DBF4	0.004229	turquoise	turquoise
THAP9	DBR1	0.046699	turquoise	turquoise
THAP9	DCAF13	0.06891	turquoise	turquoise
THAP9	DCAF8	0.030037	turquoise	turquoise
THAP9	DCC	0.000736	turquoise	turquoise
THAP9	DCDC1	0.05645	turquoise	turquoise
THAP9	DCHS2	0.016366	turquoise	turquoise
THAP9	DCLRE1B	0.001481	turquoise	turquoise
THAP9	DCTN1.AS1	0.025815	turquoise	NA
THAP9	DDAH1	0.135114	turquoise	turquoise
THAP9	DDB1	0.148597	turquoise	turquoise
THAP9	DDB2	0.003444	turquoise	turquoise
THAP9	DDI2	0.043699	turquoise	turquoise
THAP9	DDX18P1	4.05e-05	turquoise	turquoise
THAP9	DDX20	0.019763	turquoise	turquoise
THAP9	DDX20P1	0.00144	turquoise	turquoise
THAP9	DDX43P3	0.022985	turquoise	turquoise
THAP9	DDX49	0.059216	turquoise	turquoise
THAP9	DEF8	0.001123	turquoise	turquoise
THAP9	DEK	0.017962	turquoise	turquoise
THAP9	DENND11	0.084206	turquoise	turquoise
THAP9	DENND1C	0.0024	turquoise	turquoise
THAP9	DENND2C	0.001389	turquoise	turquoise
THAP9	DGAT2	0.00366	turquoise	turquoise
THAP9	DGAT2L7P	0.007279	turquoise	turquoise
THAP9	DGCR6	0.052899	turquoise	turquoise
THAP9	DGKD	0.000375	turquoise	turquoise
THAP9	DGKQ	0.002281	turquoise	turquoise
THAP9	DHDDS	0.086048	turquoise	turquoise
THAP9	DHFR	0.10344	turquoise	turquoise
THAP9	DHRS7B	0.049236	turquoise	turquoise
THAP9	DHRS7C	8.64e-05	turquoise	turquoise
THAP9	DHX32	0.023911	turquoise	turquoise
THAP9	DHX33	0.088089	turquoise	turquoise
THAP9	DHX40P1	0.022804	turquoise	turquoise
THAP9	DKK1	0.061372	turquoise	turquoise
THAP9	DLD	0.101726	turquoise	turquoise
THAP9	DMRT2	0.002847	turquoise	turquoise
THAP9	DMRTC2	0.025815	turquoise	turquoise
THAP9	DMTN	0.015836	turquoise	turquoise
THAP9	DNAAF6	0.01153	turquoise	turquoise
THAP9	DNAH12	0.009131	turquoise	turquoise
THAP9	DNAH8	0.005807	turquoise	turquoise
THAP9	DNAJA3	0.202165	turquoise	turquoise
THAP9	DNAJB14	0.141375	turquoise	turquoise
THAP9	DNAJB7	0.020618	turquoise	turquoise
THAP9	DNAJC22	0.038687	turquoise	turquoise
THAP9	DNAJC24	0.142603	turquoise	turquoise
THAP9	DNAJC8	0.081616	turquoise	turquoise
THAP9	DNAJC9	0.009717	turquoise	turquoise
THAP9	DNPEP	0.048657	turquoise	turquoise
THAP9	DOCK1	0.021977	turquoise	turquoise
THAP9	DOCK9	0.019297	turquoise	turquoise
THAP9	DOLK	0.042422	turquoise	turquoise
THAP9	DONSON	0.044958	turquoise	turquoise
THAP9	DPH2	0.036674	turquoise	turquoise
THAP9	DPP3	0.02214	turquoise	turquoise
THAP9	DPYD.AS2	0.013368	turquoise	NA
THAP9	DPYS	0.106486	turquoise	turquoise
THAP9	DRG1	0.195922	turquoise	turquoise
THAP9	DSCC1	0.00038	turquoise	turquoise
THAP9	DTL	0.000256	turquoise	turquoise
THAP9	DTYMK	0.02848	turquoise	turquoise
THAP9	DUS1L	0.015044	turquoise	turquoise
THAP9	DUXAP1	0.014791	turquoise	turquoise
THAP9	DVL1	0.003088	turquoise	turquoise
THAP9	DYNLL1	0.010951	turquoise	turquoise
THAP9	DZANK1	0.002563	turquoise	turquoise
THAP9	E2F8	0.000128	turquoise	turquoise
THAP9	EAF2	0.006779	turquoise	turquoise
THAP9	EAPP	0.149686	turquoise	turquoise
THAP9	EBAG9	0.057394	turquoise	turquoise
THAP9	EBLN1	0.025815	turquoise	turquoise
THAP9	EBLN3P	0.059588	turquoise	turquoise
THAP9	ECE2	0.004738	turquoise	turquoise
THAP9	ECH1	0.000499	turquoise	turquoise
THAP9	ECHDC1	0.018981	turquoise	turquoise
THAP9	ECHS1	0.009625	turquoise	turquoise
THAP9	ECT2	0.002301	turquoise	turquoise
THAP9	EEF1A2	0.012207	turquoise	turquoise
THAP9	EEF1B2P6	0.000703	turquoise	turquoise
THAP9	EEF2K	0.06167	turquoise	turquoise
THAP9	EEF2KMT	0.030496	turquoise	turquoise
THAP9	EFCAB11	0.003562	turquoise	turquoise
THAP9	EID1	0.041297	turquoise	turquoise
THAP9	EID2	0.026329	turquoise	turquoise
THAP9	EIF2AK3.DT	0.005421	turquoise	NA
THAP9	EIF2B1	0.124272	turquoise	turquoise
THAP9	EIF3FP3	0.000786	turquoise	turquoise
THAP9	EIF3IP1	0.025815	turquoise	turquoise
THAP9	EIF4A2	0.015705	turquoise	turquoise
THAP9	EIF4BP2	0.025815	turquoise	turquoise
THAP9	EIF4E2	0.053749	turquoise	turquoise
THAP9	ELAC2	0.080553	turquoise	turquoise
THAP9	ELMOD2	0.211446	turquoise	turquoise
THAP9	ELOVL1	0.000265	turquoise	turquoise
THAP9	ELOVL6	0.011039	turquoise	turquoise
THAP9	EMC1	0.064031	turquoise	turquoise
THAP9	EMC10	0.006991	turquoise	turquoise
THAP9	EMC2	0.092336	turquoise	turquoise
THAP9	EMC8	0.058537	turquoise	turquoise
THAP9	EMG1	0.00055	turquoise	turquoise
THAP9	ENAM	0.000787	turquoise	turquoise
THAP9	ENKUR	0.00756	turquoise	turquoise
THAP9	ENOPH1	0.030709	turquoise	turquoise
THAP9	ENPP2	0.023033	turquoise	turquoise
THAP9	ENPP4	0.139488	turquoise	turquoise
THAP9	ENY2	0.108945	turquoise	turquoise
THAP9	EP400	0.010199	turquoise	turquoise
THAP9	EPB41L1	0.024385	turquoise	turquoise
THAP9	EPB41L4A	0.030285	turquoise	turquoise
THAP9	EPHA6	0.004225	turquoise	turquoise
THAP9	EPM2A	0.234827	turquoise	turquoise
THAP9	EPS15L1	0.05374	turquoise	turquoise
THAP9	ERBB2	0.001571	turquoise	turquoise
THAP9	ERBB4	0.003503	turquoise	turquoise
THAP9	ERH	0.138399	turquoise	turquoise
THAP9	ERMP1	0.130231	turquoise	turquoise
THAP9	ERP44	0.079341	turquoise	turquoise
THAP9	EXOC5P1	0.025815	turquoise	turquoise
THAP9	EXOC6	0.205331	turquoise	turquoise
THAP9	EXOSC9	0.044638	turquoise	turquoise
THAP9	EXPH5	0.040673	turquoise	turquoise
THAP9	EXTL3	0.006578	turquoise	turquoise
THAP9	EZR.AS1	4.53e-07	turquoise	NA
THAP9	F8A1	0.000127	turquoise	turquoise
THAP9	F8A3	0.025815	turquoise	turquoise
THAP9	FAAP100	0.019414	turquoise	turquoise
THAP9	FAM111B	0.001303	turquoise	turquoise
THAP9	FAM117B	0.00056	turquoise	turquoise
THAP9	FAM120AOS	0.1323	turquoise	turquoise
THAP9	FAM126A	0.009086	turquoise	turquoise
THAP9	FAM126B	0.051528	turquoise	turquoise
THAP9	FAM133A	0.012206	turquoise	turquoise
THAP9	FAM149B1	0.062662	turquoise	turquoise
THAP9	FAM168A	0.028776	turquoise	turquoise
THAP9	FAM168B	0.003585	turquoise	turquoise
THAP9	FAM170A	0.000689	turquoise	turquoise
THAP9	FAM172A	0.022946	turquoise	turquoise
THAP9	FAM174A	0.020695	turquoise	turquoise
THAP9	FAM186B	0.052478	turquoise	turquoise
THAP9	FAM20B	0.006792	turquoise	turquoise
THAP9	FAM210A	0.102551	turquoise	turquoise
THAP9	FAM215A	0.025815	turquoise	turquoise
THAP9	FAM229B	0.012678	turquoise	turquoise
THAP9	FAM240C	0.010556	turquoise	turquoise
THAP9	FAM245A	0.000187	turquoise	turquoise
THAP9	FAM30A	0.021188	turquoise	turquoise
THAP9	FAM32A	0.075523	turquoise	turquoise
THAP9	FAM83C.AS1	5.91e-05	turquoise	NA
THAP9	FAM83F	0.022444	turquoise	turquoise
THAP9	FAM86JP	0.001215	turquoise	turquoise
THAP9	FAN1	0.182216	turquoise	turquoise
THAP9	FANCM	0.013867	turquoise	turquoise
THAP9	FARSB	0.164474	turquoise	turquoise
THAP9	FASTKD3	0.10954	turquoise	turquoise
THAP9	FBRSL1	0.011814	turquoise	turquoise
THAP9	FBXL17	0.161151	turquoise	turquoise
THAP9	FBXL20	0.035409	turquoise	turquoise
THAP9	FBXL4	0.02343	turquoise	turquoise
THAP9	FBXO16	0.1628	turquoise	turquoise
THAP9	FBXO22	0.135765	turquoise	turquoise
THAP9	FBXO3	0.127288	turquoise	turquoise
THAP9	FBXO32	0.01247	turquoise	turquoise
THAP9	FBXO36	0.056742	turquoise	turquoise
THAP9	FBXO48	0.029301	turquoise	turquoise
THAP9	FBXO8	0.085123	turquoise	turquoise
THAP9	FBXW5	0.004916	turquoise	turquoise
THAP9	FCRL2	0.001223	turquoise	turquoise
THAP9	FCRLA	0.011274	turquoise	turquoise
THAP9	FDXR	0.013167	turquoise	turquoise
THAP9	FECH	0.090939	turquoise	turquoise
THAP9	FEZ2	0.027023	turquoise	turquoise
THAP9	FGF16	0.007192	turquoise	turquoise
THAP9	FGF21	0.071034	turquoise	turquoise
THAP9	FIBP	0.010249	turquoise	turquoise
THAP9	FIGNL1	0.021993	turquoise	turquoise
THAP9	FKBP3	0.019526	turquoise	turquoise
THAP9	FKBP9	0.005135	turquoise	turquoise
THAP9	FLAD1	0.016693	turquoise	turquoise
THAP9	FLJ30679	0.001173	turquoise	turquoise
THAP9	FMO1	0.005309	turquoise	turquoise
THAP9	FMO4	0.059461	turquoise	turquoise
THAP9	FMR1	0.061707	turquoise	turquoise
THAP9	FNIP2	0.01547	turquoise	turquoise
THAP9	FOCAD	0.025273	turquoise	turquoise
THAP9	FOXN4	0.003923	turquoise	turquoise
THAP9	FOXO4	0.004724	turquoise	turquoise
THAP9	FOXP3	0.005289	turquoise	turquoise
THAP9	FOXRED1	0.001163	turquoise	turquoise
THAP9	FRG1	0.006295	turquoise	turquoise
THAP9	FST	0.096547	turquoise	turquoise
THAP9	FTLP8	0.025815	turquoise	turquoise
THAP9	FUNDC1	0.013571	turquoise	turquoise
THAP9	FURIN	0.011661	turquoise	turquoise
THAP9	FUT10	0.014806	turquoise	turquoise
THAP9	FZD1	2.08e-06	turquoise	turquoise
THAP9	FZD3	0.028093	turquoise	turquoise
THAP9	FZD4	0.003068	turquoise	turquoise
THAP9	G2E3	0.012363	turquoise	turquoise
THAP9	GABARAPL2	0.156494	turquoise	turquoise
THAP9	GABRA5	0.035888	turquoise	turquoise
THAP9	GAL3ST1	0.029067	turquoise	turquoise
THAP9	GALNS	0.004546	turquoise	turquoise
THAP9	GAPDH	0.00453	turquoise	turquoise
THAP9	GARNL3	0.002542	turquoise	turquoise
THAP9	GAS2L2	0.025815	turquoise	turquoise
THAP9	GATAD1	0.025887	turquoise	turquoise
THAP9	GATAD2B	0.015515	turquoise	turquoise
THAP9	GATD1	0.005977	turquoise	turquoise
THAP9	GBE1	0.152215	turquoise	turquoise
THAP9	GBP1P1	0.01792	turquoise	turquoise
THAP9	GBP4	0.000236	turquoise	turquoise
THAP9	GCG	0.025221	turquoise	turquoise
THAP9	GCGR	0.000121	turquoise	turquoise
THAP9	GCNT2	0.094395	turquoise	turquoise
THAP9	GDAP1	0.013703	turquoise	turquoise
THAP9	GDPD4	0.008095	turquoise	turquoise
THAP9	GEMIN8	0.002092	turquoise	turquoise
THAP9	GET3	0.046213	turquoise	turquoise
THAP9	GFER	0.000118	turquoise	turquoise
THAP9	GFRA1	0.010742	turquoise	turquoise
THAP9	GGA2	0.031071	turquoise	turquoise
THAP9	GGPS1	0.011523	turquoise	turquoise
THAP9	GHR	0.053905	turquoise	turquoise
THAP9	GHSR	0.025815	turquoise	turquoise
THAP9	GID4	0.108251	turquoise	turquoise
THAP9	GINS1	0.002387	turquoise	turquoise
THAP9	GINS2	0.000189	turquoise	turquoise
THAP9	GINS4	0.004378	turquoise	turquoise
THAP9	GIPC2	0.097977	turquoise	turquoise
THAP9	GJD3	0.006871	turquoise	turquoise
THAP9	GLG1	0.004726	turquoise	turquoise
THAP9	GLOD4	0.186569	turquoise	turquoise
THAP9	GLUD1	0.04595	turquoise	turquoise
THAP9	GLYATL3	0.002387	turquoise	turquoise
THAP9	GMCL2	0.031697	turquoise	turquoise
THAP9	GMPSP1	0.002463	turquoise	turquoise
THAP9	GNA12	0.005104	turquoise	turquoise
THAP9	GNAO1	0.065537	turquoise	turquoise
THAP9	GNPDA1	0.000533	turquoise	turquoise
THAP9	GOLGA7	0.154037	turquoise	turquoise
THAP9	GOLGA8O	0.015007	turquoise	turquoise
THAP9	GOLT1B	0.054956	turquoise	turquoise
THAP9	GON7	0.083608	turquoise	turquoise
THAP9	GORAB	0.015185	turquoise	turquoise
THAP9	GOT2P3	0.003243	turquoise	turquoise
THAP9	GPAA1	0.038314	turquoise	turquoise
THAP9	GPC3	0.011959	turquoise	turquoise
THAP9	GPD1	0.05523	turquoise	turquoise
THAP9	GPD1L	0.0016	turquoise	turquoise
THAP9	GPI	0.04929	turquoise	turquoise
THAP9	GPR107	0.026982	turquoise	turquoise
THAP9	GPR137B	0.00028	turquoise	turquoise
THAP9	GPR179	0.047727	turquoise	turquoise
THAP9	GPR19	0.000164	turquoise	turquoise
THAP9	GRIK1	0.006791	turquoise	turquoise
THAP9	GRK7	0.000281	turquoise	turquoise
THAP9	GSDMD	0.001339	turquoise	turquoise
THAP9	GSK3A	0.029901	turquoise	turquoise
THAP9	GSTO2	0.157173	turquoise	turquoise
THAP9	GSTO3P	0.025815	turquoise	turquoise
THAP9	GSX2	0.025815	turquoise	turquoise
THAP9	GTDC1	0.000507	turquoise	turquoise
THAP9	GTF2A1L	0.025815	turquoise	turquoise
THAP9	GTF2F2	0.161788	turquoise	turquoise
THAP9	GUCY1A1	0.022964	turquoise	turquoise
THAP9	GUF1	0.16347	turquoise	turquoise
THAP9	GVINP2	0.025815	turquoise	turquoise
THAP9	GYG2	0.002005	turquoise	turquoise
THAP9	H2AZ1	0.005039	turquoise	turquoise
THAP9	H2BC14	0.025815	turquoise	turquoise
THAP9	H2BC21	0.005564	turquoise	turquoise
THAP9	H3C11	0.025815	turquoise	turquoise
THAP9	H3C15	0.025815	turquoise	turquoise
THAP9	H3P32	0.025815	turquoise	turquoise
THAP9	H3P7	0.025815	turquoise	turquoise
THAP9	H4.16	0.089011	turquoise	NA
THAP9	H4C15	0.025815	turquoise	turquoise
THAP9	HADH	0.114021	turquoise	turquoise
THAP9	HARBI1	0.01092	turquoise	turquoise
THAP9	HAUS1	0.000304	turquoise	turquoise
THAP9	HAUS6	0.023642	turquoise	turquoise
THAP9	HBE1	0.003914	turquoise	turquoise
THAP9	HBG2	0.024951	turquoise	turquoise
THAP9	HDAC3	0.032806	turquoise	turquoise
THAP9	HDAC6	0.024525	turquoise	turquoise
THAP9	HELLS	8.74e-06	turquoise	turquoise
THAP9	HELZ2	0.004495	turquoise	turquoise
THAP9	HERC2	0.102209	turquoise	turquoise
THAP9	HERC3	0.098329	turquoise	turquoise
THAP9	HERC4	0.098176	turquoise	turquoise
THAP9	HEXB	0.095876	turquoise	turquoise
THAP9	HEY2	0.033968	turquoise	turquoise
THAP9	HIF1AN	0.033836	turquoise	turquoise
THAP9	HMBOX1	0.009797	turquoise	turquoise
THAP9	HMBS	0.014415	turquoise	turquoise
THAP9	HMGB1	0.050408	turquoise	turquoise
THAP9	HMGN1P33	0.025815	turquoise	turquoise
THAP9	HMGN3	0.074729	turquoise	turquoise
THAP9	HNRNPA1P27	2.82e-05	turquoise	turquoise
THAP9	HNRNPA3P15	0.025815	turquoise	turquoise
THAP9	HNRNPC	0.072896	turquoise	turquoise
THAP9	HNRNPUL2.BSCL2	0.002274	turquoise	NA
THAP9	HOMER2	0.059756	turquoise	turquoise
THAP9	HOXB8	0.003272	turquoise	turquoise
THAP9	HPF1	0.038849	turquoise	turquoise
THAP9	HS1BP3	0.099538	turquoise	turquoise
THAP9	HS2ST1	0.206898	turquoise	turquoise
THAP9	HSBP1	0.022057	turquoise	turquoise
THAP9	HSD3B1	0.018259	turquoise	turquoise
THAP9	HSPA4L	0.095836	turquoise	turquoise
THAP9	HSPB11	0.004832	turquoise	turquoise
THAP9	HTR1A	0.025815	turquoise	turquoise
THAP9	HTR2A.AS1	0.020382	turquoise	NA
THAP9	HYAL3	0.026361	turquoise	turquoise
THAP9	IDH3B	0.113919	turquoise	turquoise
THAP9	IDH3G	0.043584	turquoise	turquoise
THAP9	IER3IP1	0.103935	turquoise	turquoise
THAP9	IFRD2	0.012394	turquoise	turquoise
THAP9	IGFBP4	0.002556	turquoise	turquoise
THAP9	IGHG2	0.016213	turquoise	turquoise
THAP9	IGHJ1	0.026838	turquoise	turquoise
THAP9	IGHV2.5	0.024739	turquoise	NA
THAP9	IGHVII.60.1	0.025815	turquoise	NA
THAP9	IGIP	0.010018	turquoise	turquoise
THAP9	IGLC2	0.015533	turquoise	turquoise
THAP9	IGLCOR22.2	0.025815	turquoise	NA
THAP9	IGLV2.23	0.025422	turquoise	NA
THAP9	IHO1	0.000341	turquoise	turquoise
THAP9	IL15	0.000346	turquoise	turquoise
THAP9	IL22RA1	0.001262	turquoise	turquoise
THAP9	IL2RB	4.64e-05	turquoise	turquoise
THAP9	IL7	0.000734	turquoise	turquoise
THAP9	ILDR1	0.008242	turquoise	turquoise
THAP9	ILDR2	0.050082	turquoise	turquoise
THAP9	IMMP1L	0.018332	turquoise	turquoise
THAP9	IMMP2L	0.042867	turquoise	turquoise
THAP9	IMMTP1	0.025815	turquoise	turquoise
THAP9	IMP4	0.022444	turquoise	turquoise
THAP9	IMPA1	0.002644	turquoise	turquoise
THAP9	ING4	0.000799	turquoise	turquoise
THAP9	INHBA	0.003957	turquoise	turquoise
THAP9	INHBC	0.036114	turquoise	turquoise
THAP9	INPP4A	0.012677	turquoise	turquoise
THAP9	INPP5A	0.016304	turquoise	turquoise
THAP9	INS	0.01947	turquoise	turquoise
THAP9	INSIG2	0.00454	turquoise	turquoise
THAP9	INTS13	0.241445	turquoise	turquoise
THAP9	INTS8	0.007752	turquoise	turquoise
THAP9	IP6K1	0.00555	turquoise	turquoise
THAP9	IP6K3	0.005736	turquoise	turquoise
THAP9	IPO13	0.08466	turquoise	turquoise
THAP9	IPP	0.155018	turquoise	turquoise
THAP9	IQCG	0.000573	turquoise	turquoise
THAP9	IQSEC1	0.012913	turquoise	turquoise
THAP9	ISM1	0.059507	turquoise	turquoise
THAP9	ISOC1	0.08162	turquoise	turquoise
THAP9	ITGB3	0.000827	turquoise	turquoise
THAP9	ITGB3BP	0.005846	turquoise	turquoise
THAP9	IYD	0.025033	turquoise	turquoise
THAP9	JAK2	0.000539	turquoise	turquoise
THAP9	JARID2.AS1	0.0011	turquoise	NA
THAP9	JMJD4	0.005274	turquoise	turquoise
THAP9	JMJD8	0.126047	turquoise	turquoise
THAP9	JPX	0.006658	turquoise	turquoise
THAP9	KATNB1	0.003101	turquoise	turquoise
THAP9	KBTBD7	0.159865	turquoise	turquoise
THAP9	KCNB2	0.025815	turquoise	turquoise
THAP9	KCNG2	0.001174	turquoise	turquoise
THAP9	KCNH6	0.014601	turquoise	turquoise
THAP9	KCNK13	0.011131	turquoise	turquoise
THAP9	KCNV2	0.03265	turquoise	turquoise
THAP9	KCTD19	0.000721	turquoise	turquoise
THAP9	KIAA0232	0.069512	turquoise	turquoise
THAP9	KIAA0513	0.002637	turquoise	turquoise
THAP9	KIAA1143	0.012934	turquoise	turquoise
THAP9	KIAA1191	0.091332	turquoise	turquoise
THAP9	KIAA1328	0.021313	turquoise	turquoise
THAP9	KIAA1958	0.070239	turquoise	turquoise
THAP9	KIF13B	0.060328	turquoise	turquoise
THAP9	KIF18A	0.006191	turquoise	turquoise
THAP9	KIF1C	0.039882	turquoise	turquoise
THAP9	KIN	0.000548	turquoise	turquoise
THAP9	KISS1R	0.012605	turquoise	turquoise
THAP9	KIZ.AS1	0.010066	turquoise	NA
THAP9	KLC4	0.003774	turquoise	turquoise
THAP9	KLF13	0.003303	turquoise	turquoise
THAP9	KLF14	0.001787	turquoise	turquoise
THAP9	KLHDC10	0.040939	turquoise	turquoise
THAP9	KLHDC7A	0.012128	turquoise	turquoise
THAP9	KLHL11	0.070359	turquoise	turquoise
THAP9	KLHL14	0.001842	turquoise	turquoise
THAP9	KLHL24	0.119356	turquoise	turquoise
THAP9	KLHL8	0.121049	turquoise	turquoise
THAP9	KMT2D	0.036687	turquoise	turquoise
THAP9	KNTC1	0.017906	turquoise	turquoise
THAP9	KRT12	0.025815	turquoise	turquoise
THAP9	KRT14	0.025311	turquoise	turquoise
THAP9	KRT18P13	0.001236	turquoise	turquoise
THAP9	KRT18P24	0.025815	turquoise	turquoise
THAP9	KRT18P3	0.025815	turquoise	turquoise
THAP9	KRT18P58	0.025815	turquoise	turquoise
THAP9	KRT18P59	0.00124	turquoise	turquoise
THAP9	KRT18P60	0.025815	turquoise	turquoise
THAP9	KRT8P14	0.000121	turquoise	turquoise
THAP9	KRT8P25	0.025815	turquoise	turquoise
THAP9	KTI12	0.001213	turquoise	turquoise
THAP9	KXD1	0.000271	turquoise	turquoise
THAP9	L3MBTL4	0.063912	turquoise	turquoise
THAP9	LACC1	0.00899	turquoise	turquoise
THAP9	LACTB2	0.062054	turquoise	turquoise
THAP9	LAMP2	0.147015	turquoise	turquoise
THAP9	LAMP3	0.050756	turquoise	turquoise
THAP9	LAMP5	0.000681	turquoise	turquoise
THAP9	LAMP5.AS1	0.025815	turquoise	NA
THAP9	LAMTOR1	0.00589	turquoise	turquoise
THAP9	LANCL2	0.07335	turquoise	turquoise
THAP9	LAPTM4B	0.007733	turquoise	turquoise
THAP9	LARGE1	0.008032	turquoise	turquoise
THAP9	LARS2	0.109036	turquoise	turquoise
THAP9	LAS1L	0.184943	turquoise	turquoise
THAP9	LCN8	0.004467	turquoise	turquoise
THAP9	LEPROT	0.082184	turquoise	turquoise
THAP9	LGALS17A	0.001063	turquoise	turquoise
THAP9	LHFPL3.AS1	0.025815	turquoise	NA
THAP9	LIG1	8.61e-05	turquoise	turquoise
THAP9	LIMD1	0.019219	turquoise	turquoise
THAP9	LIN7B	0.004257	turquoise	turquoise
THAP9	LINC00319	0.008493	turquoise	turquoise
THAP9	LINC00488	0.054373	turquoise	turquoise
THAP9	LINC00515	0.000357	turquoise	turquoise
THAP9	LINC00534	0.025815	turquoise	turquoise
THAP9	LINC00547	0.025815	turquoise	turquoise
THAP9	LINC00581	0.025815	turquoise	turquoise
THAP9	LINC00589	0.002915	turquoise	turquoise
THAP9	LINC00676	0.02507	turquoise	turquoise
THAP9	LINC00845	0.050601	turquoise	turquoise
THAP9	LINC00863	0.001512	turquoise	turquoise
THAP9	LINC00906	0.002252	turquoise	turquoise
THAP9	LINC00919	0.025815	turquoise	turquoise
THAP9	LINC01058	0.000113	turquoise	turquoise
THAP9	LINC01104	0.025815	turquoise	turquoise
THAP9	LINC01167	0.025815	turquoise	turquoise
THAP9	LINC01180	0.025815	turquoise	turquoise
THAP9	LINC01229	0.001031	turquoise	turquoise
THAP9	LINC01337	0.005372	turquoise	turquoise
THAP9	LINC01362	0.006618	turquoise	turquoise
THAP9	LINC01395	0.025815	turquoise	turquoise
THAP9	LINC01405	0.005818	turquoise	turquoise
THAP9	LINC01409	0.007728	turquoise	turquoise
THAP9	LINC01441	0.025815	turquoise	turquoise
THAP9	LINC01450	0.002252	turquoise	turquoise
THAP9	LINC01547	0.042275	turquoise	turquoise
THAP9	LINC01639	0.001424	turquoise	turquoise
THAP9	LINC01687	0.028485	turquoise	turquoise
THAP9	LINC01699	0.025815	turquoise	turquoise
THAP9	LINC01721	0.020245	turquoise	turquoise
THAP9	LINC01758	0.013136	turquoise	turquoise
THAP9	LINC01781	0.005812	turquoise	turquoise
THAP9	LINC01814	0.004997	turquoise	turquoise
THAP9	LINC01942	0.008885	turquoise	turquoise
THAP9	LINC02026	0.082268	turquoise	turquoise
THAP9	LINC02056	0.025815	turquoise	turquoise
THAP9	LINC02166	0.001847	turquoise	turquoise
THAP9	LINC02175	0.025054	turquoise	turquoise
THAP9	LINC02177	0.055195	turquoise	turquoise
THAP9	LINC02257	0.025815	turquoise	turquoise
THAP9	LINC02269	0.003002	turquoise	turquoise
THAP9	LINC02318	0.006245	turquoise	turquoise
THAP9	LINC02345	0.013907	turquoise	turquoise
THAP9	LINC02395	0.025815	turquoise	turquoise
THAP9	LINC02487	0.033696	turquoise	turquoise
THAP9	LINC02541	0.002113	turquoise	turquoise
THAP9	LINC02572	0.003272	turquoise	turquoise
THAP9	LINC02607	0.056507	turquoise	turquoise
THAP9	LINC02817	0.007844	turquoise	turquoise
THAP9	LINGO4	0.038458	turquoise	turquoise
THAP9	LIPT1	0.003126	turquoise	turquoise
THAP9	LMBRD2	0.162892	turquoise	turquoise
THAP9	LNPK	0.154406	turquoise	turquoise
THAP9	LNX1	0.028409	turquoise	turquoise
THAP9	LOC100128164	0.005818	turquoise	turquoise
THAP9	LOC100129554	4.61e-05	turquoise	turquoise
THAP9	LOC100130018	0.025815	turquoise	turquoise
THAP9	LOC100130748	0.053961	turquoise	turquoise
THAP9	LOC100133091	0.000135	turquoise	turquoise
THAP9	LOC100133315	0.002419	turquoise	turquoise
THAP9	LOC100287015	0.000693	turquoise	turquoise
THAP9	LOC100287896	0.010583	turquoise	turquoise
THAP9	LOC100288853	0.025815	turquoise	turquoise
THAP9	LOC100419574	1.98e-05	turquoise	turquoise
THAP9	LOC100419913	0.025815	turquoise	turquoise
THAP9	LOC100420011	0.018418	turquoise	turquoise
THAP9	LOC100420226	0.025815	turquoise	turquoise
THAP9	LOC100420680	0.00425	turquoise	turquoise
THAP9	LOC100421091	0.025815	turquoise	turquoise
THAP9	LOC100422300	0.025815	turquoise	turquoise
THAP9	LOC100422640	0.013907	turquoise	turquoise
THAP9	LOC100506688	3.14e-05	turquoise	turquoise
THAP9	LOC100507283	0.000874	turquoise	turquoise
THAP9	LOC100507291	0.058428	turquoise	turquoise
THAP9	LOC100507551	0.001484	turquoise	turquoise
THAP9	LOC100533848	0.002252	turquoise	turquoise
THAP9	LOC100996263	0.025815	turquoise	turquoise
THAP9	LOC100996385	0.025815	turquoise	turquoise
THAP9	LOC101927023	0.002252	turquoise	turquoise
THAP9	LOC101927322	0.000318	turquoise	turquoise
THAP9	LOC101927354	0.024904	turquoise	turquoise
THAP9	LOC101927392	0.005331	turquoise	turquoise
THAP9	LOC101927837	0.007259	turquoise	turquoise
THAP9	LOC101928414	0.000138	turquoise	turquoise
THAP9	LOC101928441	0.005512	turquoise	turquoise
THAP9	LOC101928937	0.025815	turquoise	turquoise
THAP9	LOC101929268	0.01123	turquoise	turquoise
THAP9	LOC101929420	0.038873	turquoise	turquoise
THAP9	LOC102606465	0.013197	turquoise	turquoise
THAP9	LOC102723385	0.00102	turquoise	turquoise
THAP9	LOC102724532	0.023972	turquoise	turquoise
THAP9	LOC103171574	0.025815	turquoise	turquoise
THAP9	LOC105370531	0.025815	turquoise	turquoise
THAP9	LOC105370941	0.002281	turquoise	turquoise
THAP9	LOC105371022	0.000973	turquoise	turquoise
THAP9	LOC105371286	0.025815	turquoise	turquoise
THAP9	LOC105371414	0.002604	turquoise	turquoise
THAP9	LOC105371730	0.002894	turquoise	turquoise
THAP9	LOC105372316	0.019201	turquoise	turquoise
THAP9	LOC105372352	0.024314	turquoise	turquoise
THAP9	LOC105374171	0.025815	turquoise	turquoise
THAP9	LOC105375700	0.000719	turquoise	turquoise
THAP9	LOC105375851	0.025815	turquoise	turquoise
THAP9	LOC105376453	0.025815	turquoise	turquoise
THAP9	LOC105376748	0.012231	turquoise	turquoise
THAP9	LOC105379252	0.025815	turquoise	turquoise
THAP9	LOC107984208	0.025815	turquoise	turquoise
THAP9	LOC107984784	0.025815	turquoise	turquoise
THAP9	LOC107986115	9.69e-05	turquoise	turquoise
THAP9	LOC112267859	0.008526	turquoise	turquoise
THAP9	LOC112268032	0.025815	turquoise	turquoise
THAP9	LOC112268269	0.028999	turquoise	turquoise
THAP9	LOC152048	0.015112	turquoise	turquoise
THAP9	LOC153910	0.025815	turquoise	turquoise
THAP9	LOC257396	0.004867	turquoise	turquoise
THAP9	LOC284685	0.004756	turquoise	turquoise
THAP9	LOC400174	0.025815	turquoise	turquoise
THAP9	LOC400541	0.025815	turquoise	turquoise
THAP9	LOC644090	0.01375	turquoise	turquoise
THAP9	LOC729654	0.117319	turquoise	turquoise
THAP9	LONP1	0.118236	turquoise	turquoise
THAP9	LRATD2	0.04222	turquoise	turquoise
THAP9	LRCH1	0.001974	turquoise	turquoise
THAP9	LRMDA	0.067938	turquoise	turquoise
THAP9	LRP3	0.049972	turquoise	turquoise
THAP9	LRPPRC	0.186832	turquoise	turquoise
THAP9	LRRC28	0.065961	turquoise	turquoise
THAP9	LRRC3	0.011046	turquoise	turquoise
THAP9	LRRC31	0.004937	turquoise	turquoise
THAP9	LRRC37A15P	0.03273	turquoise	turquoise
THAP9	LRRC47	0.172336	turquoise	turquoise
THAP9	LRRFIP2	0.044183	turquoise	turquoise
THAP9	LRRN4CL	2.35e-05	turquoise	turquoise
THAP9	LRRTM4	0.060615	turquoise	turquoise
THAP9	LSM11	0.000939	turquoise	turquoise
THAP9	LSM3	0.062484	turquoise	turquoise
THAP9	LSM5	0.179695	turquoise	turquoise
THAP9	LSM8	0.091936	turquoise	turquoise
THAP9	LVRN	0.002683	turquoise	turquoise
THAP9	LY75.CD302	0.025815	turquoise	NA
THAP9	LYPD1	5.89e-05	turquoise	turquoise
THAP9	LYPLAL1.DT	0.034181	turquoise	NA
THAP9	LYRM2	0.059483	turquoise	turquoise
THAP9	LZTS3	0.000931	turquoise	turquoise
THAP9	MAD2L1	0.00466	turquoise	turquoise
THAP9	MAD2L2	1.41e-05	turquoise	turquoise
THAP9	MADD	0.012411	turquoise	turquoise
THAP9	MAFB	0.034279	turquoise	turquoise
THAP9	MAGEC1	0.01153	turquoise	turquoise
THAP9	MAGEF1	0.015398	turquoise	turquoise
THAP9	MAGOH	0.076859	turquoise	turquoise
THAP9	MAMDC4	0.011059	turquoise	turquoise
THAP9	MAN1B1.DT	0.011194	turquoise	NA
THAP9	MANBAL	0.002377	turquoise	turquoise
THAP9	MANEAL	6.03e-05	turquoise	turquoise
THAP9	MAP1LC3C	0.00077	turquoise	turquoise
THAP9	MAP2K2	0.000149	turquoise	turquoise
THAP9	MAP2K6	0.051125	turquoise	turquoise
THAP9	MAP3K7	0.097982	turquoise	turquoise
THAP9	MAPKAP1	0.141772	turquoise	turquoise
THAP9	MAPKAPK3	0.014488	turquoise	turquoise
THAP9	MARCHF2	0.004879	turquoise	turquoise
THAP9	MARCHF6	0.136986	turquoise	turquoise
THAP9	MARCHF8	0.088713	turquoise	turquoise
THAP9	MASP1	0.029313	turquoise	turquoise
THAP9	MAST4	0.085224	turquoise	turquoise
THAP9	MATN2	7.46e-06	turquoise	turquoise
THAP9	MAVS	0.000925	turquoise	turquoise
THAP9	MBD2	0.079097	turquoise	turquoise
THAP9	MBLAC2	0.148811	turquoise	turquoise
THAP9	MBP	0.01218	turquoise	turquoise
THAP9	MCAT	0.017525	turquoise	turquoise
THAP9	MCM2	0.000283	turquoise	turquoise
THAP9	MCM3	0.002637	turquoise	turquoise
THAP9	MCM4	0.017297	turquoise	turquoise
THAP9	MCM6	0.000361	turquoise	turquoise
THAP9	MCM7	0.000216	turquoise	turquoise
THAP9	MCM8	0.056948	turquoise	turquoise
THAP9	MCM9	0.049418	turquoise	turquoise
THAP9	MCRS1	0.000156	turquoise	turquoise
THAP9	MCTP2	0.042483	turquoise	turquoise
THAP9	MCUR1	0.08115	turquoise	turquoise
THAP9	MDH1	0.179804	turquoise	turquoise
THAP9	MDM1	0.007655	turquoise	turquoise
THAP9	ME1	0.070982	turquoise	turquoise
THAP9	MECR	0.062033	turquoise	turquoise
THAP9	MED18	0.074689	turquoise	turquoise
THAP9	MED19	0.161305	turquoise	turquoise
THAP9	MED20	0.042365	turquoise	turquoise
THAP9	MED27	0.01034	turquoise	turquoise
THAP9	MED7	0.065687	turquoise	turquoise
THAP9	MEGF8	0.048215	turquoise	turquoise
THAP9	MEI1	0.000445	turquoise	turquoise
THAP9	MEIS1.AS2	0.008729	turquoise	NA
THAP9	METTL14	0.174873	turquoise	turquoise
THAP9	METTL15	0.151253	turquoise	turquoise
THAP9	METTL5	0.040617	turquoise	turquoise
THAP9	MFF	0.045535	turquoise	turquoise
THAP9	MFSD11	0.104968	turquoise	turquoise
THAP9	MFSD14B	0.005507	turquoise	turquoise
THAP9	MFSD5	0.000126	turquoise	turquoise
THAP9	MGAT4B	0.009776	turquoise	turquoise
THAP9	MGC27382	0.057439	turquoise	turquoise
THAP9	MGC32805	0.129808	turquoise	turquoise
THAP9	MGLL	0.07027	turquoise	turquoise
THAP9	MGME1	0.085269	turquoise	turquoise
THAP9	MICU2	0.152525	turquoise	turquoise
THAP9	MIEN1	0.002355	turquoise	turquoise
THAP9	MIF	0.000237	turquoise	turquoise
THAP9	MIGA1	0.194266	turquoise	turquoise
THAP9	MIPEP	0.15716	turquoise	turquoise
THAP9	MIR1208	0.025815	turquoise	turquoise
THAP9	MIR1258	0.025815	turquoise	turquoise
THAP9	MIR137HG	0.025815	turquoise	turquoise
THAP9	MIR190B	0.025815	turquoise	turquoise
THAP9	MIR3136	0.053961	turquoise	turquoise
THAP9	MIR3192	0.025815	turquoise	turquoise
THAP9	MIR339	0.006618	turquoise	turquoise
THAP9	MIR34AHG	0.001778	turquoise	turquoise
THAP9	MIR3692	0.025815	turquoise	turquoise
THAP9	MIR4269	0.025815	turquoise	turquoise
THAP9	MIR4299	0.025815	turquoise	turquoise
THAP9	MIR4312	0.025815	turquoise	turquoise
THAP9	MIR4440	0.025815	turquoise	turquoise
THAP9	MIR4491	0.025815	turquoise	turquoise
THAP9	MIR4513	0.025815	turquoise	turquoise
THAP9	MIR4524B	0.024409	turquoise	turquoise
THAP9	MIR4530	0.000194	turquoise	turquoise
THAP9	MIR4664	0.000602	turquoise	turquoise
THAP9	MIR4742	0.012605	turquoise	turquoise
THAP9	MIR4795	0.025815	turquoise	turquoise
THAP9	MIR5195	0.005754	turquoise	turquoise
THAP9	MIR544B	0.025815	turquoise	turquoise
THAP9	MIR5692C2	0.025815	turquoise	turquoise
THAP9	MIR5697	0.025815	turquoise	turquoise
THAP9	MIR5706	0.025815	turquoise	turquoise
THAP9	MIR574	0.00979	turquoise	turquoise
THAP9	MIR601	0.025815	turquoise	turquoise
THAP9	MIR624	0.025815	turquoise	turquoise
THAP9	MIR6821	0.025815	turquoise	turquoise
THAP9	MIR6859.1	0.025815	turquoise	NA
THAP9	MIR762HG	0.00139	turquoise	turquoise
THAP9	MIR8089	0.025815	turquoise	turquoise
THAP9	MIR9.3HG	2.51e-07	turquoise	NA
THAP9	MIS18A	0.007949	turquoise	turquoise
THAP9	MIXL1	0.001337	turquoise	turquoise
THAP9	MKKS	0.014238	turquoise	turquoise
THAP9	MKRN1	0.098246	turquoise	turquoise
THAP9	MKRN2	0.076327	turquoise	turquoise
THAP9	MLANA	0.102841	turquoise	turquoise
THAP9	MLF2	0.010392	turquoise	turquoise
THAP9	MLIP	0.003466	turquoise	turquoise
THAP9	MMP27	0.009619	turquoise	turquoise
THAP9	MOCS2	0.126423	turquoise	turquoise
THAP9	MOCS3	0.046371	turquoise	turquoise
THAP9	MOGAT2	0.015964	turquoise	turquoise
THAP9	MOSPD1	0.000801	turquoise	turquoise
THAP9	MPG	0.005387	turquoise	turquoise
THAP9	MPHOSPH10	0.11522	turquoise	turquoise
THAP9	MPHOSPH6	0.024608	turquoise	turquoise
THAP9	MPND	0.008308	turquoise	turquoise
THAP9	MPP1	0.010051	turquoise	turquoise
THAP9	MPP5	0.179265	turquoise	turquoise
THAP9	MRE11	0.00683	turquoise	turquoise
THAP9	MRM1	0.063896	turquoise	turquoise
THAP9	MRM3	0.080434	turquoise	turquoise
THAP9	MRPL10	0.001681	turquoise	turquoise
THAP9	MRPL15	0.106683	turquoise	turquoise
THAP9	MRPL16	0.168188	turquoise	turquoise
THAP9	MRPL18	0.040011	turquoise	turquoise
THAP9	MRPL19	0.046273	turquoise	turquoise
THAP9	MRPL2	0.018565	turquoise	turquoise
THAP9	MRPL22	0.075987	turquoise	turquoise
THAP9	MRPL30	0.252244	turquoise	turquoise
THAP9	MRPL36	0.058531	turquoise	turquoise
THAP9	MRPL38	0.056929	turquoise	turquoise
THAP9	MRPL39	0.169989	turquoise	turquoise
THAP9	MRPL42	0.23849	turquoise	turquoise
THAP9	MRPL44	0.097141	turquoise	turquoise
THAP9	MRPL47	0.1294	turquoise	turquoise
THAP9	MRPL49	0.092807	turquoise	turquoise
THAP9	MRPL54	0.011236	turquoise	turquoise
THAP9	MRPL58	0.18237	turquoise	turquoise
THAP9	MRPS10	0.107977	turquoise	turquoise
THAP9	MRPS11	0.086222	turquoise	turquoise
THAP9	MRPS16	0.16042	turquoise	turquoise
THAP9	MRPS18A	0.136797	turquoise	turquoise
THAP9	MRPS18C	0.079862	turquoise	turquoise
THAP9	MRPS2	0.064882	turquoise	turquoise
THAP9	MRPS22	0.184496	turquoise	turquoise
THAP9	MRPS23	0.151622	turquoise	turquoise
THAP9	MRPS25	0.084932	turquoise	turquoise
THAP9	MRPS26	0.060661	turquoise	turquoise
THAP9	MRPS35	0.165357	turquoise	turquoise
THAP9	MRPS36	0.037592	turquoise	turquoise
THAP9	MRPS6	0.025577	turquoise	turquoise
THAP9	MRPS6P1	0.025815	turquoise	turquoise
THAP9	MRTFB	0.043708	turquoise	turquoise
THAP9	MS4A10	0.025815	turquoise	turquoise
THAP9	MSANTD3.TMEFF1	0.001257	turquoise	NA
THAP9	MSRA	0.023426	turquoise	turquoise
THAP9	MSTO1	0.038944	turquoise	turquoise
THAP9	MTATP6P27	0.025815	turquoise	turquoise
THAP9	MTATP8P1	0.005267	turquoise	turquoise
THAP9	MTCH1	0.147724	turquoise	turquoise
THAP9	MTCH2	0.051523	turquoise	turquoise
THAP9	MTCO1P12	0.028166	turquoise	turquoise
THAP9	MTCO1P40	0.000982	turquoise	turquoise
THAP9	MTCO1P42	0.013277	turquoise	turquoise
THAP9	MTCO1P53	0.056914	turquoise	turquoise
THAP9	MTCO1P7	0.023077	turquoise	turquoise
THAP9	MTCO1P8	0.003002	turquoise	turquoise
THAP9	MTCO2P22	0.000426	turquoise	turquoise
THAP9	MTCO3P12	0.057182	turquoise	turquoise
THAP9	MTCO3P22	0.000966	turquoise	turquoise
THAP9	MTCO3P23	0.013368	turquoise	turquoise
THAP9	MTCO3P38	0.025815	turquoise	turquoise
THAP9	MTCYBP19	0.025815	turquoise	turquoise
THAP9	MTCYBP23	0.041945	turquoise	turquoise
THAP9	MTCYBP35	0.010836	turquoise	turquoise
THAP9	MTCYBP41	0.025815	turquoise	turquoise
THAP9	MTERF1	0.067136	turquoise	turquoise
THAP9	MTERF4	0.155737	turquoise	turquoise
THAP9	MTFR1	0.095641	turquoise	turquoise
THAP9	MTHFD1L	0.002162	turquoise	turquoise
THAP9	MTHFD2P7	0.025815	turquoise	turquoise
THAP9	MTMR14	0.008695	turquoise	turquoise
THAP9	MTND1P30	0.025815	turquoise	turquoise
THAP9	MTND2P32	0.025815	turquoise	turquoise
THAP9	MTND5P11	0.014155	turquoise	turquoise
THAP9	MTND6P22	0.007133	turquoise	turquoise
THAP9	MTOR	0.046409	turquoise	turquoise
THAP9	MTRNR2L3	0.003057	turquoise	turquoise
THAP9	MTSS2	0.009037	turquoise	turquoise
THAP9	MTTP	0.030025	turquoise	turquoise
THAP9	MTX1P1	0.04124	turquoise	turquoise
THAP9	MTX3	0.043898	turquoise	turquoise
THAP9	MVB12B	0.000934	turquoise	turquoise
THAP9	MYBBP1A	0.081917	turquoise	turquoise
THAP9	MYCBP	0.087259	turquoise	turquoise
THAP9	MYCL	0.012824	turquoise	turquoise
THAP9	MYLK.AS1	0.003989	turquoise	NA
THAP9	MYO5B	0.056527	turquoise	turquoise
THAP9	MYO6	0.058511	turquoise	turquoise
THAP9	MYOSLID	0.012804	turquoise	turquoise
THAP9	MYOZ3	0.000164	turquoise	turquoise
THAP9	MZB1	0.000332	turquoise	turquoise
THAP9	NAA10	0.028501	turquoise	turquoise
THAP9	NAA20	0.052726	turquoise	turquoise
THAP9	NACC1	0.024446	turquoise	turquoise
THAP9	NACC2	0.002954	turquoise	turquoise
THAP9	NADK	0.01155	turquoise	turquoise
THAP9	NAE1	0.201189	turquoise	turquoise
THAP9	NALCN.AS1	6.13e-05	turquoise	NA
THAP9	NAP1L4	0.0547	turquoise	turquoise
THAP9	NAPA	0.108517	turquoise	turquoise
THAP9	NARS1	0.126346	turquoise	turquoise
THAP9	NARS2	0.133865	turquoise	turquoise
THAP9	NATD1	0.001226	turquoise	turquoise
THAP9	NAV2.AS2	0.025815	turquoise	NA
THAP9	NAV3	2.24e-05	turquoise	turquoise
THAP9	NAXD	0.046778	turquoise	turquoise
THAP9	NAXE	0.014385	turquoise	turquoise
THAP9	NCAPH2	3.06e-05	turquoise	turquoise
THAP9	NCBP2AS2	0.000128	turquoise	turquoise
THAP9	NCLN	0.023683	turquoise	turquoise
THAP9	NCOA4	0.121664	turquoise	turquoise
THAP9	ND1	0.000683	turquoise	turquoise
THAP9	ND4	0.001817	turquoise	turquoise
THAP9	ND4L	0.016791	turquoise	turquoise
THAP9	ND5	0.010562	turquoise	turquoise
THAP9	NDUFA10	0.20695	turquoise	turquoise
THAP9	NDUFA4	0.055547	turquoise	turquoise
THAP9	NDUFA5	0.173496	turquoise	turquoise
THAP9	NDUFAF1	0.052529	turquoise	turquoise
THAP9	NDUFAF3	0.020083	turquoise	turquoise
THAP9	NDUFAF6	0.083415	turquoise	turquoise
THAP9	NDUFB4P12	0.025815	turquoise	turquoise
THAP9	NDUFB4P6	0.025815	turquoise	turquoise
THAP9	NDUFB5	0.130703	turquoise	turquoise
THAP9	NDUFB6	0.030985	turquoise	turquoise
THAP9	NDUFB8	0.005657	turquoise	turquoise
THAP9	NDUFB8P1	0.025815	turquoise	turquoise
THAP9	NDUFS1	0.120948	turquoise	turquoise
THAP9	NDUFS7	0.018184	turquoise	turquoise
THAP9	NDUFV2	0.000843	turquoise	turquoise
THAP9	NECAP1	0.115544	turquoise	turquoise
THAP9	NECTIN1	0.047782	turquoise	turquoise
THAP9	NEDD1	0.046946	turquoise	turquoise
THAP9	NEK1	0.13512	turquoise	turquoise
THAP9	NEK5	0.001112	turquoise	turquoise
THAP9	NELFB	0.000605	turquoise	turquoise
THAP9	NEMP1	0.033257	turquoise	turquoise
THAP9	NF2	0.011001	turquoise	turquoise
THAP9	NFE2L2	0.005057	turquoise	turquoise
THAP9	NFRKB	0.036332	turquoise	turquoise
THAP9	NGDN	0.02013	turquoise	turquoise
THAP9	NHLRC3	0.17376	turquoise	turquoise
THAP9	NICN1	0.003086	turquoise	turquoise
THAP9	NIFKP3	0.025815	turquoise	turquoise
THAP9	NIN	0.007424	turquoise	turquoise
THAP9	NIPAL1	0.001371	turquoise	turquoise
THAP9	NIPAL3	0.014974	turquoise	turquoise
THAP9	NKAP	0.058371	turquoise	turquoise
THAP9	NKX1.1	0.025815	turquoise	NA
THAP9	NLE1	0.000199	turquoise	turquoise
THAP9	NME6	0.028845	turquoise	turquoise
THAP9	NMNAT1	0.050136	turquoise	turquoise
THAP9	NMT1	0.130602	turquoise	turquoise
THAP9	NOL11	0.205262	turquoise	turquoise
THAP9	NOMO1	0.0261	turquoise	turquoise
THAP9	NOP10	0.189624	turquoise	turquoise
THAP9	NOTUM	0.000881	turquoise	turquoise
THAP9	NPHP3.AS1	0.000293	turquoise	NA
THAP9	NPIPB13	0.005696	turquoise	turquoise
THAP9	NR1D2	0.000704	turquoise	turquoise
THAP9	NR1H2	0.006794	turquoise	turquoise
THAP9	NRAP	0.037033	turquoise	turquoise
THAP9	NRG4	0.021331	turquoise	turquoise
THAP9	NRL	0.001725	turquoise	turquoise
THAP9	NRTN	0.001248	turquoise	turquoise
THAP9	NSF	0.161004	turquoise	turquoise
THAP9	NSFL1C	0.186011	turquoise	turquoise
THAP9	NSMCE2	0.056292	turquoise	turquoise
THAP9	NSMCE4A	0.009774	turquoise	turquoise
THAP9	NT5DC3	0.026184	turquoise	turquoise
THAP9	NTAN1P2	0.012081	turquoise	turquoise
THAP9	NTN1	0.004118	turquoise	turquoise
THAP9	NUB1	0.096566	turquoise	turquoise
THAP9	NUBP2	0.016499	turquoise	turquoise
THAP9	NUDT12	0.067188	turquoise	turquoise
THAP9	NUDT15	0.121079	turquoise	turquoise
THAP9	NUDT5	0.101241	turquoise	turquoise
THAP9	NUDT7	0.012469	turquoise	turquoise
THAP9	NUFIP1	0.024669	turquoise	turquoise
THAP9	NUP155	0.231427	turquoise	turquoise
THAP9	NXPE1	0.006618	turquoise	turquoise
THAP9	NXPE4	0.025815	turquoise	turquoise
THAP9	NXPH1	0.007494	turquoise	turquoise
THAP9	NXT2	0.072386	turquoise	turquoise
THAP9	OAS3	0.064502	turquoise	turquoise
THAP9	OBSCN.AS1	1.88e-07	turquoise	NA
THAP9	OGDH	0.159983	turquoise	turquoise
THAP9	OGDHL	0.125301	turquoise	turquoise
THAP9	OIP5	7.22e-05	turquoise	turquoise
THAP9	OLA1	0.031522	turquoise	turquoise
THAP9	OMA1	0.156164	turquoise	turquoise
THAP9	ONECUT2	0.025524	turquoise	turquoise
THAP9	OPA1	0.129108	turquoise	turquoise
THAP9	OPA3	0.019053	turquoise	turquoise
THAP9	OPN1SW	2.16e-06	turquoise	turquoise
THAP9	OR11N1P	0.025815	turquoise	turquoise
THAP9	OR2A1	0.025815	turquoise	turquoise
THAP9	OR2A14	0.025815	turquoise	turquoise
THAP9	OR2L13	0.025815	turquoise	turquoise
THAP9	OR3A3	0.025815	turquoise	turquoise
THAP9	OR52K2	0.025815	turquoise	turquoise
THAP9	OR52N4	1.35e-05	turquoise	turquoise
THAP9	OR5AK3P	0.012605	turquoise	turquoise
THAP9	OR5B3	0.025815	turquoise	turquoise
THAP9	OR7A19P	0.053961	turquoise	turquoise
THAP9	ORC4	0.091364	turquoise	turquoise
THAP9	ORMDL3	0.089748	turquoise	turquoise
THAP9	OSBPL1A	0.036087	turquoise	turquoise
THAP9	OSBPL6	0.005336	turquoise	turquoise
THAP9	OSGEPL1	0.057654	turquoise	turquoise
THAP9	OSTCP3	0.001731	turquoise	turquoise
THAP9	OSTM1	0.033071	turquoise	turquoise
THAP9	OTUD5	0.01325	turquoise	turquoise
THAP9	OTUD6B	0.00648	turquoise	turquoise
THAP9	OTUD7A	0.000361	turquoise	turquoise
THAP9	OVOS2	7.08e-05	turquoise	turquoise
THAP9	OXSM	0.101143	turquoise	turquoise
THAP9	P2RX2	5.21e-06	turquoise	turquoise
THAP9	PAAF1	0.012923	turquoise	turquoise
THAP9	PABPC3	0.000206	turquoise	turquoise
THAP9	PABPC4	0.001277	turquoise	turquoise
THAP9	PACRGL	0.009	turquoise	turquoise
THAP9	PADI1	0.026411	turquoise	turquoise
THAP9	PAQR3	0.026834	turquoise	turquoise
THAP9	PARG	0.113212	turquoise	turquoise
THAP9	PARP12	0.007485	turquoise	turquoise
THAP9	PARP1P1	0.025815	turquoise	turquoise
THAP9	PAX6	0.001257	turquoise	turquoise
THAP9	PCBD2	0.04151	turquoise	turquoise
THAP9	PCDH15	0.030552	turquoise	turquoise
THAP9	PCDH18	0.001525	turquoise	turquoise
THAP9	PCDHA10	0.014741	turquoise	turquoise
THAP9	PCDHA12	0.032596	turquoise	turquoise
THAP9	PCDHA13	0.003603	turquoise	turquoise
THAP9	PCDHA6	0.022391	turquoise	turquoise
THAP9	PCDHA7	0.07776	turquoise	turquoise
THAP9	PCDHAC1	0.059789	turquoise	turquoise
THAP9	PCDHGA11	0.000265	turquoise	turquoise
THAP9	PCDHGA4	0.000327	turquoise	turquoise
THAP9	PCDHGA5	0.00233	turquoise	turquoise
THAP9	PCDHGB2	0.000123	turquoise	turquoise
THAP9	PCDHGC4	0.006987	turquoise	turquoise
THAP9	PCGF6	0.090453	turquoise	turquoise
THAP9	PCLO	0.011371	turquoise	turquoise
THAP9	PCNA	0.016747	turquoise	turquoise
THAP9	PCNX3	0.021979	turquoise	turquoise
THAP9	PDCD10	0.142852	turquoise	turquoise
THAP9	PDCD6	0.054569	turquoise	turquoise
THAP9	PDCD6IPP1	0.017641	turquoise	turquoise
THAP9	PDCL3P6	0.025815	turquoise	turquoise
THAP9	PDE11A	0.02172	turquoise	turquoise
THAP9	PDE11A.AS1	0.022528	turquoise	NA
THAP9	PDE8B	0.115796	turquoise	turquoise
THAP9	PDHB	0.057498	turquoise	turquoise
THAP9	PDK1	0.074603	turquoise	turquoise
THAP9	PDK2	0.007963	turquoise	turquoise
THAP9	PDPK1	0.021418	turquoise	turquoise
THAP9	PDPR	0.02471	turquoise	turquoise
THAP9	PDRG1	0.024887	turquoise	turquoise
THAP9	PEBP4	0.020414	turquoise	turquoise
THAP9	PEPD	0.009816	turquoise	turquoise
THAP9	PER3	0.002109	turquoise	turquoise
THAP9	PEX2	0.202605	turquoise	turquoise
THAP9	PFDN4	0.000432	turquoise	turquoise
THAP9	PFDN6	0.007687	turquoise	turquoise
THAP9	PFKFB2	0.008746	turquoise	turquoise
THAP9	PFKL	0.012792	turquoise	turquoise
THAP9	PGA3	0.01153	turquoise	turquoise
THAP9	PGAM1	0.135012	turquoise	turquoise
THAP9	PGAP6	0.050027	turquoise	turquoise
THAP9	PGM2	0.064355	turquoise	turquoise
THAP9	PGRMC1	0.166354	turquoise	turquoise
THAP9	PHB	0.058338	turquoise	turquoise
THAP9	PHB2	0.033019	turquoise	turquoise
THAP9	PHBP5	0.025815	turquoise	turquoise
THAP9	PHF11	0.000706	turquoise	turquoise
THAP9	PHF5A	0.007966	turquoise	turquoise
THAP9	PHYKPL	0.026649	turquoise	turquoise
THAP9	PI4K2A	0.020869	turquoise	turquoise
THAP9	PIAS2	0.019133	turquoise	turquoise
THAP9	PIGB	0.005259	turquoise	turquoise
THAP9	PIGH	0.011977	turquoise	turquoise
THAP9	PIGK	0.128559	turquoise	turquoise
THAP9	PIGU	0.002284	turquoise	turquoise
THAP9	PIGX	0.032478	turquoise	turquoise
THAP9	PIN4	0.025657	turquoise	turquoise
THAP9	PINK1	0.05426	turquoise	turquoise
THAP9	PIP4K2B	0.004487	turquoise	turquoise
THAP9	PIP4K2C	0.139422	turquoise	turquoise
THAP9	PIRT	0.025815	turquoise	turquoise
THAP9	PITHD1	0.149068	turquoise	turquoise
THAP9	PITPNA	0.062725	turquoise	turquoise
THAP9	PIWIL1	0.014407	turquoise	turquoise
THAP9	PIWIL3	0.025815	turquoise	turquoise
THAP9	PKD1P2	0.000185	turquoise	turquoise
THAP9	PKIA.AS1	0.025815	turquoise	NA
THAP9	PKN2.AS1	0.002319	turquoise	NA
THAP9	PKP3	0.000545	turquoise	turquoise
THAP9	PKP4	0.023122	turquoise	turquoise
THAP9	PLA2G12B	0.013865	turquoise	turquoise
THAP9	PLBD2	0.03463	turquoise	turquoise
THAP9	PLCH2	0.015861	turquoise	turquoise
THAP9	PLCXD1	0.007049	turquoise	turquoise
THAP9	PLD6	0.005272	turquoise	turquoise
THAP9	PLEKHA8	0.008238	turquoise	turquoise
THAP9	PLEKHG7	0.04064	turquoise	turquoise
THAP9	PLEKHM2	1.68e-06	turquoise	turquoise
THAP9	PLGRKT	0.028047	turquoise	turquoise
THAP9	PLIN4	0.000161	turquoise	turquoise
THAP9	PLOD1	0.013311	turquoise	turquoise
THAP9	PLXNA2	0.001827	turquoise	turquoise
THAP9	PLXNA4	0.006082	turquoise	turquoise
THAP9	PM20D1	0.031103	turquoise	turquoise
THAP9	PNLIPRP2	0.002252	turquoise	turquoise
THAP9	PNPLA4	0.01396	turquoise	turquoise
THAP9	PNPLA6	0.008567	turquoise	turquoise
THAP9	POGLUT2	0.023727	turquoise	turquoise
THAP9	POLA2	0.014768	turquoise	turquoise
THAP9	POLD1	9.23e-05	turquoise	turquoise
THAP9	POLE	0.049982	turquoise	turquoise
THAP9	POLE3	0.076847	turquoise	turquoise
THAP9	POLR2D	0.185769	turquoise	turquoise
THAP9	POLR2E	0.107967	turquoise	turquoise
THAP9	POLR2K	0.206891	turquoise	turquoise
THAP9	POLR3G	0.000602	turquoise	turquoise
THAP9	POMP	0.133803	turquoise	turquoise
THAP9	POP4	0.117555	turquoise	turquoise
THAP9	POT1	0.094273	turquoise	turquoise
THAP9	PP7080	0.004295	turquoise	turquoise
THAP9	PPA2	0.08938	turquoise	turquoise
THAP9	PPFIBP2	0.00574	turquoise	turquoise
THAP9	PPIAL4D	0.025815	turquoise	turquoise
THAP9	PPIAP30	0.025815	turquoise	turquoise
THAP9	PPIAP67	0.000194	turquoise	turquoise
THAP9	PPIAP91	0.00384	turquoise	turquoise
THAP9	PPIH	0.046296	turquoise	turquoise
THAP9	PPIP5K1	0.058264	turquoise	turquoise
THAP9	PPM1A	0.129545	turquoise	turquoise
THAP9	PPM1B	0.073519	turquoise	turquoise
THAP9	PPM1H	0.104846	turquoise	turquoise
THAP9	PPM1L	0.163251	turquoise	turquoise
THAP9	PPME1	0.018069	turquoise	turquoise
THAP9	PPP1R2	0.035806	turquoise	turquoise
THAP9	PPP3R1	0.127988	turquoise	turquoise
THAP9	PPP3R2	0.025815	turquoise	turquoise
THAP9	PPP6C	0.135957	turquoise	turquoise
THAP9	PRADC1	0.007089	turquoise	turquoise
THAP9	PRAMEF10	0.111645	turquoise	turquoise
THAP9	PRC1.AS1	0.000208	turquoise	NA
THAP9	PRDX3	0.177892	turquoise	turquoise
THAP9	PRDX5	0.035558	turquoise	turquoise
THAP9	PREP	0.066929	turquoise	turquoise
THAP9	PRIM2	0.011348	turquoise	turquoise
THAP9	PRKAB2	0.027175	turquoise	turquoise
THAP9	PRKACA	0.007928	turquoise	turquoise
THAP9	PRKACG	0.025815	turquoise	turquoise
THAP9	PRKAG1	0.187511	turquoise	turquoise
THAP9	PRKAR1B	0.002545	turquoise	turquoise
THAP9	PRKAR2A	0.081761	turquoise	turquoise
THAP9	PRKCQ.AS1	7.48e-06	turquoise	NA
THAP9	PRMT3	0.057402	turquoise	turquoise
THAP9	PRMT7	0.017909	turquoise	turquoise
THAP9	PRPS1	0.085117	turquoise	turquoise
THAP9	PRRG4	0.022328	turquoise	turquoise
THAP9	PRRT4	0.004062	turquoise	turquoise
THAP9	PRXL2A	0.159709	turquoise	turquoise
THAP9	PRXL2B	3.81e-05	turquoise	turquoise
THAP9	PSIP1	0.000311	turquoise	turquoise
THAP9	PSKH1	0.000377	turquoise	turquoise
THAP9	PSKH2	0.025815	turquoise	turquoise
THAP9	PSMA2	0.187417	turquoise	turquoise
THAP9	PSMA3	0.1264	turquoise	turquoise
THAP9	PSMA4	0.187837	turquoise	turquoise
THAP9	PSMB1	0.086053	turquoise	turquoise
THAP9	PSMB2	0.177351	turquoise	turquoise
THAP9	PSMB4	0.100105	turquoise	turquoise
THAP9	PSMB5	0.18551	turquoise	turquoise
THAP9	PSMB7	0.139699	turquoise	turquoise
THAP9	PSMC1	0.147476	turquoise	turquoise
THAP9	PSMC1P3	0.025815	turquoise	turquoise
THAP9	PSMC1P4	0.025815	turquoise	turquoise
THAP9	PSMC2	0.142666	turquoise	turquoise
THAP9	PSMC4	0.075333	turquoise	turquoise
THAP9	PSMD10	0.202543	turquoise	turquoise
THAP9	PSMD13	0.123549	turquoise	turquoise
THAP9	PSMD14	0.164328	turquoise	turquoise
THAP9	PSMD2P1	0.004546	turquoise	turquoise
THAP9	PSMD3	0.12936	turquoise	turquoise
THAP9	PSMD6	0.151566	turquoise	turquoise
THAP9	PSMD6.AS2	0.007083	turquoise	NA
THAP9	PSMG2	0.03001	turquoise	turquoise
THAP9	PSMG3.AS1	0.01927	turquoise	NA
THAP9	PSMG4	0.005332	turquoise	turquoise
THAP9	PSTK	0.090591	turquoise	turquoise
THAP9	PTCSC2	0.025815	turquoise	turquoise
THAP9	PTGES2	0.033334	turquoise	turquoise
THAP9	PTGES3L.AARSD1	0.008493	turquoise	NA
THAP9	PTP4A1P3	0.025815	turquoise	turquoise
THAP9	PTPA	0.026586	turquoise	turquoise
THAP9	PTPMT1	0.052891	turquoise	turquoise
THAP9	PTPRA	0.029883	turquoise	turquoise
THAP9	PTPRJ	0.091403	turquoise	turquoise
THAP9	PUM2	0.172022	turquoise	turquoise
THAP9	PURPL	0.000969	turquoise	turquoise
THAP9	PUS7	0.033403	turquoise	turquoise
THAP9	PUS7L	0.019225	turquoise	turquoise
THAP9	PXYLP1	0.007425	turquoise	turquoise
THAP9	PYURF	0.003121	turquoise	turquoise
THAP9	QRSL1	0.124253	turquoise	turquoise
THAP9	RAB18	0.188354	turquoise	turquoise
THAP9	RAB19	0.000424	turquoise	turquoise
THAP9	RAB2A	0.102293	turquoise	turquoise
THAP9	RAB5B	0.028704	turquoise	turquoise
THAP9	RAB7A	0.203986	turquoise	turquoise
THAP9	RAB8A	0.07768	turquoise	turquoise
THAP9	RABGAP1L	0.16446	turquoise	turquoise
THAP9	RABGGTA	0.008758	turquoise	turquoise
THAP9	RABGGTB	0.033178	turquoise	turquoise
THAP9	RABL3	0.070703	turquoise	turquoise
THAP9	RAD18	0.037604	turquoise	turquoise
THAP9	RAD23B	0.193222	turquoise	turquoise
THAP9	RAD51AP1	0.000401	turquoise	turquoise
THAP9	RAD51C	0.084813	turquoise	turquoise
THAP9	RAD51D	0.000103	turquoise	turquoise
THAP9	RAD54L2	0.008519	turquoise	turquoise
THAP9	RAE1	0.099323	turquoise	turquoise
THAP9	RAG1	0.023035	turquoise	turquoise
THAP9	RALA	0.068123	turquoise	turquoise
THAP9	RALGPS1	0.026976	turquoise	turquoise
THAP9	RALY	0.000799	turquoise	turquoise
THAP9	RAMAC	0.089068	turquoise	turquoise
THAP9	RANBP9	0.16786	turquoise	turquoise
THAP9	RAP1A	0.006075	turquoise	turquoise
THAP9	RAP2C.AS1	0.185861	turquoise	NA
THAP9	RAPGEF6	0.00112	turquoise	turquoise
THAP9	RB1	0.022484	turquoise	turquoise
THAP9	RB1.DT	0.004417	turquoise	NA
THAP9	RBBP4P2	0.00036	turquoise	turquoise
THAP9	RBBP7	0.116126	turquoise	turquoise
THAP9	RBM20	0.007548	turquoise	turquoise
THAP9	RBM3	6.66e-06	turquoise	turquoise
THAP9	RBMX2P1	0.053961	turquoise	turquoise
THAP9	RBMXL2	3.91e-05	turquoise	turquoise
THAP9	RBPMS2	0.012356	turquoise	turquoise
THAP9	RCC1	0.005078	turquoise	turquoise
THAP9	RDH10.AS1	0.027506	turquoise	NA
THAP9	REEP3	0.083848	turquoise	turquoise
THAP9	REEP5	0.158433	turquoise	turquoise
THAP9	REEP6	0.004797	turquoise	turquoise
THAP9	REPS2	0.064003	turquoise	turquoise
THAP9	RETREG2	0.045167	turquoise	turquoise
THAP9	REXO4	0.007188	turquoise	turquoise
THAP9	REXO5	0.017093	turquoise	turquoise
THAP9	RFC2	0.011407	turquoise	turquoise
THAP9	RFC3	0.06176	turquoise	turquoise
THAP9	RFC5	0.031533	turquoise	turquoise
THAP9	RFK	0.193274	turquoise	turquoise
THAP9	RFPL4A	0.00723	turquoise	turquoise
THAP9	RGS16	0.008955	turquoise	turquoise
THAP9	RHPN1.AS1	0.026871	turquoise	NA
THAP9	RIMS2	0.013808	turquoise	turquoise
THAP9	RMDN1	0.132941	turquoise	turquoise
THAP9	RMDN3	0.100892	turquoise	turquoise
THAP9	RMI2	0.001298	turquoise	turquoise
THAP9	RMND5A	0.062348	turquoise	turquoise
THAP9	RMND5B	0.163921	turquoise	turquoise
THAP9	RN7SKP144	0.025815	turquoise	turquoise
THAP9	RN7SKP177	0.025815	turquoise	turquoise
THAP9	RN7SKP223	0.025815	turquoise	turquoise
THAP9	RN7SL110P	0.025815	turquoise	turquoise
THAP9	RN7SL134P	0.025815	turquoise	turquoise
THAP9	RN7SL15P	0.0175	turquoise	turquoise
THAP9	RN7SL225P	0.025815	turquoise	turquoise
THAP9	RN7SL25P	0.018987	turquoise	turquoise
THAP9	RN7SL268P	0.000959	turquoise	turquoise
THAP9	RN7SL272P	0.025815	turquoise	turquoise
THAP9	RN7SL322P	0.025815	turquoise	turquoise
THAP9	RN7SL332P	0.025815	turquoise	turquoise
THAP9	RN7SL459P	0.025815	turquoise	turquoise
THAP9	RN7SL49P	0.001038	turquoise	turquoise
THAP9	RN7SL521P	0.012178	turquoise	turquoise
THAP9	RN7SL581P	0.025815	turquoise	turquoise
THAP9	RN7SL582P	0.025815	turquoise	turquoise
THAP9	RN7SL600P	0.005696	turquoise	turquoise
THAP9	RN7SL60P	0.025815	turquoise	turquoise
THAP9	RN7SL650P	0.006618	turquoise	turquoise
THAP9	RN7SL684P	0.025815	turquoise	turquoise
THAP9	RN7SL698P	0.025815	turquoise	turquoise
THAP9	RN7SL743P	0.025815	turquoise	turquoise
THAP9	RN7SL752P	9.69e-05	turquoise	turquoise
THAP9	RN7SL753P	0.025815	turquoise	turquoise
THAP9	RN7SL864P	0.025815	turquoise	turquoise
THAP9	RNA5SP123	0.025815	turquoise	turquoise
THAP9	RNA5SP159	0.025815	turquoise	turquoise
THAP9	RNA5SP203	0.000432	turquoise	turquoise
THAP9	RNA5SP217	0.005788	turquoise	turquoise
THAP9	RNA5SP372	0.025815	turquoise	turquoise
THAP9	RNA5SP39	0.025815	turquoise	turquoise
THAP9	RNA5SP394	0.025815	turquoise	turquoise
THAP9	RNA5SP440	0.025815	turquoise	turquoise
THAP9	RNA5SP75	0.025815	turquoise	turquoise
THAP9	RNA5SP88	0.025815	turquoise	turquoise
THAP9	RNASEH1.AS1	0.001165	turquoise	NA
THAP9	RNASEH1P2	0.025815	turquoise	turquoise
THAP9	RNF103	0.074868	turquoise	turquoise
THAP9	RNF121	0.084553	turquoise	turquoise
THAP9	RNF123	0.159112	turquoise	turquoise
THAP9	RNF14	0.065558	turquoise	turquoise
THAP9	RNF141	0.115902	turquoise	turquoise
THAP9	RNF165	0.013159	turquoise	turquoise
THAP9	RNF216	0.07848	turquoise	turquoise
THAP9	RNF220	0.002015	turquoise	turquoise
THAP9	RNF8	0.013077	turquoise	turquoise
THAP9	RNH1	0.008822	turquoise	turquoise
THAP9	RNU2.53P	0.025815	turquoise	NA
THAP9	RNU4.49P	0.025815	turquoise	NA
THAP9	RNU6.1181P	0.025815	turquoise	NA
THAP9	RNU6.1231P	0.000725	turquoise	NA
THAP9	RNU6.1277P	0.025815	turquoise	NA
THAP9	RNU6.1309P	0.025815	turquoise	NA
THAP9	RNU6.130P	0.057944	turquoise	NA
THAP9	RNU6.205P	0.025815	turquoise	NA
THAP9	RNU6.213P	0.025815	turquoise	NA
THAP9	RNU6.250P	0.025815	turquoise	NA
THAP9	RNU6.25P	0.025815	turquoise	NA
THAP9	RNU6.354P	0.025815	turquoise	NA
THAP9	RNU6.36P	0.025815	turquoise	NA
THAP9	RNU6.485P	0.001042	turquoise	NA
THAP9	RNU6.504P	0.025815	turquoise	NA
THAP9	RNU6.526P	0.011921	turquoise	NA
THAP9	RNU6.534P	0.025815	turquoise	NA
THAP9	RNU6.640P	0.025815	turquoise	NA
THAP9	RNU6.689P	0.000777	turquoise	NA
THAP9	RNU6.707P	0.025815	turquoise	NA
THAP9	RNU6.762P	0.00027	turquoise	NA
THAP9	RNU6.767P	0.025815	turquoise	NA
THAP9	RNU6.769P	0.025815	turquoise	NA
THAP9	RNU6.817P	0.025815	turquoise	NA
THAP9	RNU6.822P	0.025815	turquoise	NA
THAP9	RNU6.834P	0.001173	turquoise	NA
THAP9	RNU6.869P	0.025815	turquoise	NA
THAP9	RNU6.95P	0.025815	turquoise	NA
THAP9	RNU6.991P	0.025815	turquoise	NA
THAP9	RNU6ATAC17P	0.000121	turquoise	turquoise
THAP9	RNU6ATAC23P	0.025815	turquoise	turquoise
THAP9	RNU7.123P	0.025815	turquoise	NA
THAP9	RNU7.125P	0.025815	turquoise	NA
THAP9	RNU7.71P	0.025815	turquoise	NA
THAP9	RNY4P17	0.025815	turquoise	turquoise
THAP9	RORC	0.184015	turquoise	turquoise
THAP9	RPL10AP1	0.053961	turquoise	turquoise
THAP9	RPL12P12	0.000128	turquoise	turquoise
THAP9	RPL13AP6	8.81e-06	turquoise	turquoise
THAP9	RPL13P8	0.014992	turquoise	turquoise
THAP9	RPL15P11	0.005818	turquoise	turquoise
THAP9	RPL15P16	0.025815	turquoise	turquoise
THAP9	RPL17.C18orf32	0.000258	turquoise	NA
THAP9	RPL17P18	0.011737	turquoise	turquoise
THAP9	RPL17P22	6.8e-06	turquoise	turquoise
THAP9	RPL21P125	3.46e-05	turquoise	turquoise
THAP9	RPL21P45	0.001436	turquoise	turquoise
THAP9	RPL21P53	0.004195	turquoise	turquoise
THAP9	RPL21P55	0.025815	turquoise	turquoise
THAP9	RPL21P74	0.025815	turquoise	turquoise
THAP9	RPL23AP23	0.025815	turquoise	turquoise
THAP9	RPL23AP69	0.008493	turquoise	turquoise
THAP9	RPL23AP8	0.000683	turquoise	turquoise
THAP9	RPL24P7	0.025815	turquoise	turquoise
THAP9	RPL24P9	0.025815	turquoise	turquoise
THAP9	RPL26P23	0.002243	turquoise	turquoise
THAP9	RPL26P6	0.007037	turquoise	turquoise
THAP9	RPL27P11	0.025815	turquoise	turquoise
THAP9	RPL28P5	0.002512	turquoise	turquoise
THAP9	RPL31P1	0.025815	turquoise	turquoise
THAP9	RPL31P30	0.025815	turquoise	turquoise
THAP9	RPL31P35	0.025815	turquoise	turquoise
THAP9	RPL31P37	0.025815	turquoise	turquoise
THAP9	RPL34P4	0.025815	turquoise	turquoise
THAP9	RPL35AP14	0.025815	turquoise	turquoise
THAP9	RPL35P3	0.025815	turquoise	turquoise
THAP9	RPL37P5	0.025815	turquoise	turquoise
THAP9	RPL39L	0.000312	turquoise	turquoise
THAP9	RPL6P27	7.31e-05	turquoise	turquoise
THAP9	RPL7AP15	0.010066	turquoise	turquoise
THAP9	RPL7AP16	0.013663	turquoise	turquoise
THAP9	RPL7AP50	0.017364	turquoise	turquoise
THAP9	RPL7AP71	0.008493	turquoise	turquoise
THAP9	RPL7P39	0.025815	turquoise	turquoise
THAP9	RPL7P47	0.012572	turquoise	turquoise
THAP9	RPL7P60	0.008287	turquoise	turquoise
THAP9	RPL9P7	0.002344	turquoise	turquoise
THAP9	RPP14	0.084539	turquoise	turquoise
THAP9	RPP30	0.070684	turquoise	turquoise
THAP9	RPP40	0.04164	turquoise	turquoise
THAP9	RPS10P11	0.000815	turquoise	turquoise
THAP9	RPS10P13	0.000817	turquoise	turquoise
THAP9	RPS12P9	0.025815	turquoise	turquoise
THAP9	RPS15	0.000457	turquoise	turquoise
THAP9	RPS15AP20	0.025815	turquoise	turquoise
THAP9	RPS15AP5	0.025815	turquoise	turquoise
THAP9	RPS15P4	4.39e-06	turquoise	turquoise
THAP9	RPS16P2	0.025815	turquoise	turquoise
THAP9	RPS17P3	0.004058	turquoise	turquoise
THAP9	RPS23P2	0.025815	turquoise	turquoise
THAP9	RPS29P23	0.025815	turquoise	turquoise
THAP9	RPS2P33	0.025815	turquoise	turquoise
THAP9	RPS2P34	0.025815	turquoise	turquoise
THAP9	RPS2P53	0.002912	turquoise	turquoise
THAP9	RPS3AP48	0.025815	turquoise	turquoise
THAP9	RPS5P7	0.025815	turquoise	turquoise
THAP9	RPS6KL1	0.001804	turquoise	turquoise
THAP9	RPS6P17	0.053961	turquoise	turquoise
THAP9	RPSAP11	0.025815	turquoise	turquoise
THAP9	RPSAP36	0.00027	turquoise	turquoise
THAP9	RPSAP38	0.025815	turquoise	turquoise
THAP9	RPSAP63	0.025815	turquoise	turquoise
THAP9	RPTOR	0.058521	turquoise	turquoise
THAP9	RPUSD2	0.022095	turquoise	turquoise
THAP9	RPUSD4	0.089065	turquoise	turquoise
THAP9	RRH	0.034519	turquoise	turquoise
THAP9	RRM1	0.160166	turquoise	turquoise
THAP9	RRM2	0.000186	turquoise	turquoise
THAP9	RRM2B	0.10864	turquoise	turquoise
THAP9	RRNAD1	0.010406	turquoise	turquoise
THAP9	RSAD1	0.117098	turquoise	turquoise
THAP9	RSU1	0.042317	turquoise	turquoise
THAP9	RTBDN	0.025815	turquoise	turquoise
THAP9	RTCA	0.194427	turquoise	turquoise
THAP9	RTF2	0.231488	turquoise	turquoise
THAP9	RTN4RL1	0.001892	turquoise	turquoise
THAP9	RTRAF	0.215306	turquoise	turquoise
THAP9	RUVBL2	0.005453	turquoise	turquoise
THAP9	RWDD4	0.042023	turquoise	turquoise
THAP9	RXRA	0.012446	turquoise	turquoise
THAP9	SAE1	0.027581	turquoise	turquoise
THAP9	SAG	1.73e-06	turquoise	turquoise
THAP9	SAMM50	0.210718	turquoise	turquoise
THAP9	SAP18	0.069465	turquoise	turquoise
THAP9	SAP30L	0.010365	turquoise	turquoise
THAP9	SATB2	0.07369	turquoise	turquoise
THAP9	SATB2.AS1	0.004064	turquoise	NA
THAP9	SAXO2	0.023549	turquoise	turquoise
THAP9	SAYSD1	0.075637	turquoise	turquoise
THAP9	SCAP	0.018274	turquoise	turquoise
THAP9	SCARNA18	0.005818	turquoise	turquoise
THAP9	SCARNA7	0.051962	turquoise	turquoise
THAP9	SCD	0.0103	turquoise	turquoise
THAP9	SCFD2	0.098602	turquoise	turquoise
THAP9	SCML2	0.054431	turquoise	turquoise
THAP9	SCN9A	0.000772	turquoise	turquoise
THAP9	SCNN1D	0.000631	turquoise	turquoise
THAP9	SCO1	0.170106	turquoise	turquoise
THAP9	SCOC	0.107621	turquoise	turquoise
THAP9	SCP2	0.010783	turquoise	turquoise
THAP9	SCRIB	0.046242	turquoise	turquoise
THAP9	SCRN3	0.200676	turquoise	turquoise
THAP9	SCT	0.000139	turquoise	turquoise
THAP9	SCUBE1	0.005383	turquoise	turquoise
THAP9	SCYL1	0.005908	turquoise	turquoise
THAP9	SCYL2	0.079548	turquoise	turquoise
THAP9	SCYL2P1	0.000678	turquoise	turquoise
THAP9	SDHA	0.075643	turquoise	turquoise
THAP9	SDHAF3	0.054626	turquoise	turquoise
THAP9	SDHC	0.101181	turquoise	turquoise
THAP9	SEC13	0.148365	turquoise	turquoise
THAP9	SECISBP2L	0.158237	turquoise	turquoise
THAP9	SELENOF	0.076235	turquoise	turquoise
THAP9	SELENOT	0.185292	turquoise	turquoise
THAP9	SENP8	0.034801	turquoise	turquoise
THAP9	SEPTIN7P7	0.025815	turquoise	turquoise
THAP9	SERAC1	0.022642	turquoise	turquoise
THAP9	SERINC2	0.024966	turquoise	turquoise
THAP9	SERPINA9	0.043538	turquoise	turquoise
THAP9	SESN3	0.092341	turquoise	turquoise
THAP9	SETD7	0.200603	turquoise	turquoise
THAP9	SETD9	0.010842	turquoise	turquoise
THAP9	SF3A3	0.142186	turquoise	turquoise
THAP9	SF3B5	0.01007	turquoise	turquoise
THAP9	SF3B6	0.071815	turquoise	turquoise
THAP9	SFRP1	5.49e-06	turquoise	turquoise
THAP9	SFXN5	0.016277	turquoise	turquoise
THAP9	SGCB	0.010196	turquoise	turquoise
THAP9	SGCZ	4.24e-05	turquoise	turquoise
THAP9	SGPL1	0.071103	turquoise	turquoise
THAP9	SGTA	0.008902	turquoise	turquoise
THAP9	SH2D4A	0.016889	turquoise	turquoise
THAP9	SH3BP2	0.004051	turquoise	turquoise
THAP9	SH3PXD2A.AS1	0.000169	turquoise	NA
THAP9	SHC4	0.003853	turquoise	turquoise
THAP9	SHLD2	0.176621	turquoise	turquoise
THAP9	SHMT1	0.012809	turquoise	turquoise
THAP9	SI	0.025815	turquoise	turquoise
THAP9	SIDT2	0.042191	turquoise	turquoise
THAP9	SIPA1	0.000639	turquoise	turquoise
THAP9	SIPA1L3	0.040135	turquoise	turquoise
THAP9	SIRT1	0.052021	turquoise	turquoise
THAP9	SKA2	0.000939	turquoise	turquoise
THAP9	SKAP2	9.22e-05	turquoise	turquoise
THAP9	SKI	0.048333	turquoise	turquoise
THAP9	SKP2	0.11425	turquoise	turquoise
THAP9	SLBP	0.008286	turquoise	turquoise
THAP9	SLC10A2	0.025815	turquoise	turquoise
THAP9	SLC10A5	0.019595	turquoise	turquoise
THAP9	SLC22A2	0.01802	turquoise	turquoise
THAP9	SLC22A7	0.001802	turquoise	turquoise
THAP9	SLC25A24P1	0.00176	turquoise	turquoise
THAP9	SLC25A39	0.00754	turquoise	turquoise
THAP9	SLC25A42	0.005068	turquoise	turquoise
THAP9	SLC25A43	0.005297	turquoise	turquoise
THAP9	SLC25A5	0.119643	turquoise	turquoise
THAP9	SLC2A4	3.25e-05	turquoise	turquoise
THAP9	SLC2A5	0.041003	turquoise	turquoise
THAP9	SLC2A9	0.004666	turquoise	turquoise
THAP9	SLC30A4	0.091557	turquoise	turquoise
THAP9	SLC30A9	0.171497	turquoise	turquoise
THAP9	SLC35A2	0.132615	turquoise	turquoise
THAP9	SLC35B2	0.005517	turquoise	turquoise
THAP9	SLC35B4	0.0228	turquoise	turquoise
THAP9	SLC35E2A	0.025466	turquoise	turquoise
THAP9	SLC38A9	0.175936	turquoise	turquoise
THAP9	SLC39A6	0.006834	turquoise	turquoise
THAP9	SLC3A1	0.002236	turquoise	turquoise
THAP9	SLC41A3	0.00136	turquoise	turquoise
THAP9	SLC46A3	0.065406	turquoise	turquoise
THAP9	SLC47A1	0.096756	turquoise	turquoise
THAP9	SLC48A1	0.029726	turquoise	turquoise
THAP9	SLC49A3	0.005892	turquoise	turquoise
THAP9	SLC4A2	0.0153	turquoise	turquoise
THAP9	SLC5A3	0.08734	turquoise	turquoise
THAP9	SLC6A1.AS1	0.021564	turquoise	NA
THAP9	SLC6A2	0.028538	turquoise	turquoise
THAP9	SLCO2B1	0.107616	turquoise	turquoise
THAP9	SLF2	0.00423	turquoise	turquoise
THAP9	SLU7	0.130072	turquoise	turquoise
THAP9	SLX4	0.017899	turquoise	turquoise
THAP9	SMAP1	0.155654	turquoise	turquoise
THAP9	SMARCB1	0.01905	turquoise	turquoise
THAP9	SMARCC1	0.06583	turquoise	turquoise
THAP9	SMCR8	0.000964	turquoise	turquoise
THAP9	SMG1	0.031474	turquoise	turquoise
THAP9	SMG1P1	0.003872	turquoise	turquoise
THAP9	SMG5	0.029736	turquoise	turquoise
THAP9	SMIM11A	0.005576	turquoise	turquoise
THAP9	SMIM18	0.000591	turquoise	turquoise
THAP9	SMIM27	0.020679	turquoise	turquoise
THAP9	SMO	0.034474	turquoise	turquoise
THAP9	SMYD2	0.0023	turquoise	turquoise
THAP9	SMYD5	0.003553	turquoise	turquoise
THAP9	SNAP47	0.01049	turquoise	turquoise
THAP9	SNAPC1	0.010815	turquoise	turquoise
THAP9	SNHG21	0.021438	turquoise	turquoise
THAP9	SNORA14B	0.007067	turquoise	turquoise
THAP9	SNORA40B	0.025815	turquoise	turquoise
THAP9	SNORA50A	0.025815	turquoise	turquoise
THAP9	SNORA55	0.003691	turquoise	turquoise
THAP9	SNORA63D	0.025815	turquoise	turquoise
THAP9	SNORD11	0.025815	turquoise	turquoise
THAP9	SNORD115.20	0.025815	turquoise	NA
THAP9	SNORD116.14	0.025815	turquoise	NA
THAP9	SNORD117	0.030501	turquoise	turquoise
THAP9	SNORD88A	0.025815	turquoise	turquoise
THAP9	SNORD93	0.025815	turquoise	turquoise
THAP9	SNRNP25	0.022919	turquoise	turquoise
THAP9	SNRPB	0.000201	turquoise	turquoise
THAP9	SNRPB2	0.051389	turquoise	turquoise
THAP9	SNRPCP11	0.025815	turquoise	turquoise
THAP9	SNU13	0.007837	turquoise	turquoise
THAP9	SNX1	0.09128	turquoise	turquoise
THAP9	SNX10	0.038755	turquoise	turquoise
THAP9	SNX11	0.003145	turquoise	turquoise
THAP9	SNX12	0.069985	turquoise	turquoise
THAP9	SNX13	0.122138	turquoise	turquoise
THAP9	SNX24	0.009962	turquoise	turquoise
THAP9	SNX27	0.093243	turquoise	turquoise
THAP9	SNX3	0.232849	turquoise	turquoise
THAP9	SNX30	0.001799	turquoise	turquoise
THAP9	SNX4	0.196345	turquoise	turquoise
THAP9	SNX5	0.007606	turquoise	turquoise
THAP9	SORCS2	0.018423	turquoise	turquoise
THAP9	SORL1	0.176923	turquoise	turquoise
THAP9	SOWAHA	0.036813	turquoise	turquoise
THAP9	SOX1.OT	0.025815	turquoise	NA
THAP9	SOX6	0.104294	turquoise	turquoise
THAP9	SP100	0.024523	turquoise	turquoise
THAP9	SPAST	0.101886	turquoise	turquoise
THAP9	SPATA20	0.000175	turquoise	turquoise
THAP9	SPATA31E1	0.025815	turquoise	turquoise
THAP9	SPATA8	0.008493	turquoise	turquoise
THAP9	SPATA8.AS1	0.025815	turquoise	NA
THAP9	SPDYE1	0.001425	turquoise	turquoise
THAP9	SPDYE3	0.110355	turquoise	turquoise
THAP9	SPG21	0.013038	turquoise	turquoise
THAP9	SPG7	0.012295	turquoise	turquoise
THAP9	SPIN2P1	0.025815	turquoise	turquoise
THAP9	SPOCK3	0.007502	turquoise	turquoise
THAP9	SPPL3	0.002945	turquoise	turquoise
THAP9	SPRY3	0.005594	turquoise	turquoise
THAP9	SPTLC1	0.098683	turquoise	turquoise
THAP9	SPTLC1P4	0.025815	turquoise	turquoise
THAP9	SQSTM1	0.029812	turquoise	turquoise
THAP9	SRGAP2C	0.004537	turquoise	turquoise
THAP9	SRP14	0.056701	turquoise	turquoise
THAP9	SRSF8	0.066684	turquoise	turquoise
THAP9	SSB	0.030878	turquoise	turquoise
THAP9	SSBP1	0.068741	turquoise	turquoise
THAP9	SSTR1	0.028861	turquoise	turquoise
THAP9	SSTR5	0.002269	turquoise	turquoise
THAP9	SSTR5.AS1	0.024527	turquoise	NA
THAP9	ST3GAL3	0.000251	turquoise	turquoise
THAP9	ST6GAL2	0.001588	turquoise	turquoise
THAP9	ST6GALNAC2	0.01985	turquoise	turquoise
THAP9	ST7.AS1	0.000172	turquoise	NA
THAP9	STAG3L4	0.006534	turquoise	turquoise
THAP9	STAM.AS1	0.001404	turquoise	NA
THAP9	STAP1	0.017818	turquoise	turquoise
THAP9	STARD3NL	0.00281	turquoise	turquoise
THAP9	STEAP3	0.005321	turquoise	turquoise
THAP9	STIM1	0.079302	turquoise	turquoise
THAP9	STK26	0.133087	turquoise	turquoise
THAP9	STK35	0.016804	turquoise	turquoise
THAP9	STRADB	0.049525	turquoise	turquoise
THAP9	STRBP	0.072695	turquoise	turquoise
THAP9	STS	0.045381	turquoise	turquoise
THAP9	STX17	0.103402	turquoise	turquoise
THAP9	STX18	0.015258	turquoise	turquoise
THAP9	STX1B	0.020619	turquoise	turquoise
THAP9	SUCLG2.AS1	0.018512	turquoise	NA
THAP9	SUGP1	0.00312	turquoise	turquoise
THAP9	SUGT1	0.169899	turquoise	turquoise
THAP9	SULF2	0.025494	turquoise	turquoise
THAP9	SULT1B1	0.073795	turquoise	turquoise
THAP9	SULT1C2	0.001855	turquoise	turquoise
THAP9	SULT1C2P1	0.000929	turquoise	turquoise
THAP9	SULT2A1	0.09306	turquoise	turquoise
THAP9	SULT6B1	0.008493	turquoise	turquoise
THAP9	SUMO1	0.16685	turquoise	turquoise
THAP9	SUN1	0.118539	turquoise	turquoise
THAP9	SUPT16H	0.038568	turquoise	turquoise
THAP9	SUPT16HP1	0.010542	turquoise	turquoise
THAP9	SUPV3L1	0.136468	turquoise	turquoise
THAP9	SUV39H2	0.083186	turquoise	turquoise
THAP9	SVIL	0.017132	turquoise	turquoise
THAP9	SVIP	0.011191	turquoise	turquoise
THAP9	SYCN	0.025815	turquoise	turquoise
THAP9	SYNGR2	0.002566	turquoise	turquoise
THAP9	SYNJ2BP	0.195957	turquoise	turquoise
THAP9	SYPL1P2	0.001155	turquoise	turquoise
THAP9	SYT6	0.008568	turquoise	turquoise
THAP9	SYT7	0.075476	turquoise	turquoise
THAP9	TAAR3P	6.39e-05	turquoise	turquoise
THAP9	TAB2	0.049234	turquoise	turquoise
THAP9	TADA2B	0.132932	turquoise	turquoise
THAP9	TADA3	0.000183	turquoise	turquoise
THAP9	TAF1	0.038221	turquoise	turquoise
THAP9	TAF10	0.000226	turquoise	turquoise
THAP9	TAF11	0.045222	turquoise	turquoise
THAP9	TAF1B	0.023694	turquoise	turquoise
THAP9	TAF4	0.061049	turquoise	turquoise
THAP9	TAF6	0.000552	turquoise	turquoise
THAP9	TAGLN2	1.37e-05	turquoise	turquoise
THAP9	TAMM41	0.053782	turquoise	turquoise
THAP9	TANGO2	9.71e-06	turquoise	turquoise
THAP9	TAP2	0.00118	turquoise	turquoise
THAP9	TAS1R3	0.001854	turquoise	turquoise
THAP9	TAS2R10	0.004741	turquoise	turquoise
THAP9	TAS2R31	0.018202	turquoise	turquoise
THAP9	TAS2R50	0.001966	turquoise	turquoise
THAP9	TAS2R60	0.001954	turquoise	turquoise
THAP9	TASP1	0.017578	turquoise	turquoise
THAP9	TATDN2	0.00205	turquoise	turquoise
THAP9	TBC1D13	0.002011	turquoise	turquoise
THAP9	TBC1D14	0.039989	turquoise	turquoise
THAP9	TBC1D22A	0.002257	turquoise	turquoise
THAP9	TBC1D28	0.025815	turquoise	turquoise
THAP9	TBC1D2B	0.005631	turquoise	turquoise
THAP9	TBC1D31	0.006171	turquoise	turquoise
THAP9	TBC1D3F	0.025815	turquoise	turquoise
THAP9	TBC1D5	0.055813	turquoise	turquoise
THAP9	TBC1D8.AS1	0.018465	turquoise	NA
THAP9	TBC1D9B	0.039762	turquoise	turquoise
THAP9	TBCD	0.052762	turquoise	turquoise
THAP9	TBL1X	0.047066	turquoise	turquoise
THAP9	TBL3	0.088753	turquoise	turquoise
THAP9	TBRG4	0.10958	turquoise	turquoise
THAP9	TEFM	0.098724	turquoise	turquoise
THAP9	TENT2	0.098714	turquoise	turquoise
THAP9	TET2	0.054402	turquoise	turquoise
THAP9	TEX101	0.025815	turquoise	turquoise
THAP9	TEX261	0.043979	turquoise	turquoise
THAP9	TEX30	0.041356	turquoise	turquoise
THAP9	TEX38	0.004389	turquoise	turquoise
THAP9	TEX41	0.006002	turquoise	turquoise
THAP9	TEX46	0.014456	turquoise	turquoise
THAP9	TFDP2	0.038868	turquoise	turquoise
THAP9	TFGP1	0.025815	turquoise	turquoise
THAP9	TFPI2.DT	0.025815	turquoise	NA
THAP9	TGFBR1	0.085693	turquoise	turquoise
THAP9	TGM6	0.025815	turquoise	turquoise
THAP9	THAP12P5	0.025815	turquoise	turquoise
[truncated: 270 more rows]

## Sheet: CHOL_tumor
gene1	gene2	correlation	module1	module2
THAP9	AAK1	0.000648	yellow	yellow
THAP9	ABCC5	0.001905	yellow	yellow
THAP9	ABHD13	0.001569	yellow	yellow
THAP9	ABHD18	0.002626	yellow	yellow
THAP9	ABHD5	0.006625	yellow	yellow
THAP9	ABRAXAS1	0.0048	yellow	yellow
THAP9	ACAD11	0.001356	yellow	yellow
THAP9	ACAD8	0.002317	yellow	yellow
THAP9	ACER2	0.007543	yellow	yellow
THAP9	ACSS2	0.001547	yellow	yellow
THAP9	ACTR2	0.000968	yellow	yellow
THAP9	ACVR1B	0.00124	yellow	yellow
THAP9	ADAMTS5	0.000102	yellow	yellow
THAP9	ADGRA3	0.002016	yellow	yellow
THAP9	ADGRF4	8.26e-06	yellow	yellow
THAP9	ADNP	0.017982	yellow	yellow
THAP9	ADPRHL1	8.36e-05	yellow	yellow
THAP9	AGFG1	0.001553	yellow	yellow
THAP9	AGO4	0.001237	yellow	yellow
THAP9	AGPAT3	4.84e-05	yellow	yellow
THAP9	AGPAT5	0.002017	yellow	yellow
THAP9	AGPS	0.000752	yellow	yellow
THAP9	AHCYL2	0.007316	yellow	yellow
THAP9	AIG1P1	3.33e-05	yellow	yellow
THAP9	AKAP10	0.006062	yellow	yellow
THAP9	AKAP13	0.004072	yellow	yellow
THAP9	AKAP6	0.005212	yellow	yellow
THAP9	ALG12	0.002352	yellow	yellow
THAP9	ALKBH8	0.006904	yellow	yellow
THAP9	ALMS1	0.003905	yellow	yellow
THAP9	ALPK1	0.00086	yellow	yellow
THAP9	ALS2	0.005913	yellow	yellow
THAP9	AMBRA1	0.003405	yellow	yellow
THAP9	AMD1	1.13e-05	yellow	yellow
THAP9	AMMECR1L	0.012024	yellow	yellow
THAP9	ANAPC1	0.004254	yellow	yellow
THAP9	ANKFY1	0.007351	yellow	yellow
THAP9	ANKRA2	0.00172	yellow	yellow
THAP9	ANKRD11	0.003838	yellow	yellow
THAP9	ANKRD12	0.006353	yellow	yellow
THAP9	ANKRD17	0.053394	yellow	yellow
THAP9	ANKRD27	0.017522	yellow	yellow
THAP9	ANKRD28	0.006358	yellow	yellow
THAP9	ANKRD40	0.003387	yellow	yellow
THAP9	ANKS1A	0.004829	yellow	yellow
THAP9	ANO6	0.000963	yellow	yellow
THAP9	AP1AR	0.003828	yellow	yellow
THAP9	AP1G1	0.006013	yellow	yellow
THAP9	AP5M1	0.001875	yellow	yellow
THAP9	APAF1	0.002617	yellow	yellow
THAP9	APC	0.015716	yellow	yellow
THAP9	APOOL	0.003191	yellow	yellow
THAP9	APPBP2	0.000966	yellow	yellow
THAP9	APPL1	0.008442	yellow	yellow
THAP9	AQR	0.005678	yellow	yellow
THAP9	ARFGEF2	0.008703	yellow	yellow
THAP9	ARHGAP18	0.004112	yellow	yellow
THAP9	ARHGAP29	0.00041	yellow	yellow
THAP9	ARHGAP35	0.000959	yellow	yellow
THAP9	ARHGAP44	0.002635	yellow	yellow
THAP9	ARHGAP5	0.025028	yellow	yellow
THAP9	ARHGEF12	0.015852	yellow	yellow
THAP9	ARHGEF17	0.021326	yellow	yellow
THAP9	ARHGEF9	0.008295	yellow	yellow
THAP9	ARID1A	0.007774	yellow	yellow
THAP9	ARID2	0.005353	yellow	yellow
THAP9	ARID4A	0.026186	yellow	yellow
THAP9	ARIH1	0.003268	yellow	yellow
THAP9	ARL13B	0.001397	yellow	yellow
THAP9	ARL17A	0.002921	yellow	yellow
THAP9	ARL5B	0.001386	yellow	yellow
THAP9	ARL6IP6	0.000673	yellow	yellow
THAP9	ARMC8	0.001964	yellow	yellow
THAP9	ARMCX4	0.001827	yellow	yellow
THAP9	ARMCX5	0.002717	yellow	yellow
THAP9	ARPC4.TTLL3	0.00072	yellow	NA
THAP9	ARPP19	0.001767	yellow	yellow
THAP9	ARSD	0.000138	yellow	yellow
THAP9	ARSK	0.004761	yellow	yellow
THAP9	ASAP2	0.00234	yellow	yellow
THAP9	ASB8	0.001106	yellow	yellow
THAP9	ASXL2	0.002728	yellow	yellow
THAP9	ATAD2B	0.005843	yellow	yellow
THAP9	ATF1	0.016901	yellow	yellow
THAP9	ATF2	0.000901	yellow	yellow
THAP9	ATF7IP	0.019455	yellow	yellow
THAP9	ATG14	0.007592	yellow	yellow
THAP9	ATG2B	0.005631	yellow	yellow
THAP9	ATG9A	0.000477	yellow	yellow
THAP9	ATMIN	0.004594	yellow	yellow
THAP9	ATP11B	0.010494	yellow	yellow
THAP9	ATP2B4	0.002267	yellow	yellow
THAP9	ATP6AP2	0.001207	yellow	yellow
THAP9	ATP6V1A	0.003122	yellow	yellow
THAP9	ATP7A	0.011267	yellow	yellow
THAP9	ATP8A2P2	0.00041	yellow	yellow
THAP9	ATRX	0.032383	yellow	yellow
THAP9	ATXN1	0.005825	yellow	yellow
THAP9	ATXN1L	0.017846	yellow	yellow
THAP9	ATXN3	0.00121	yellow	yellow
THAP9	ATXN7	0.014378	yellow	yellow
THAP9	AZI2	0.008106	yellow	yellow
THAP9	B3GNT2	0.001661	yellow	yellow
THAP9	BACE1	0.013246	yellow	yellow
THAP9	BACH1	0.002506	yellow	yellow
THAP9	BAHD1	0.006243	yellow	yellow
THAP9	BAZ1B	0.001813	yellow	yellow
THAP9	BAZ2A	0.018478	yellow	yellow
THAP9	BAZ2B	0.01057	yellow	yellow
THAP9	BCL2L11	9.18e-05	yellow	yellow
THAP9	BCL2L2	0.020864	yellow	yellow
THAP9	BCL2L2.PABPN1	4.58e-05	yellow	NA
THAP9	BCL9L	0.010987	yellow	yellow
THAP9	BCOR	0.015974	yellow	yellow
THAP9	BDP1	0.008329	yellow	yellow
THAP9	BECN1	0.000562	yellow	yellow
THAP9	BHLHB9	0.002251	yellow	yellow
THAP9	BIRC6	0.008861	yellow	yellow
THAP9	BLOC1S6	0.000907	yellow	yellow
THAP9	BMPR2	0.003109	yellow	yellow
THAP9	BMT2	0.00301	yellow	yellow
THAP9	BOD1L1	0.017642	yellow	yellow
THAP9	BPTF	0.015695	yellow	yellow
THAP9	BRAF	0.026199	yellow	yellow
THAP9	BRD2	0.006116	yellow	yellow
THAP9	BRMS1L	0.021216	yellow	yellow
THAP9	BRPF3	0.005643	yellow	yellow
THAP9	BRWD1	0.00065	yellow	yellow
THAP9	BRWD3	0.004496	yellow	yellow
THAP9	BTAF1	0.012688	yellow	yellow
THAP9	BTG3.AS1	0.000266	yellow	NA
THAP9	BTRC	0.002046	yellow	yellow
THAP9	C11orf65	0.00011	yellow	yellow
THAP9	C14orf132	5.23e-05	yellow	yellow
THAP9	C16orf70	0.001116	yellow	yellow
THAP9	C16orf72	0.006444	yellow	yellow
THAP9	C21orf91	0.002145	yellow	yellow
THAP9	C2CD5	0.001576	yellow	yellow
THAP9	C2orf49	0.00578	yellow	yellow
THAP9	C5orf22	2.99e-05	yellow	yellow
THAP9	C5orf51	0.001326	yellow	yellow
THAP9	C5orf66	0.000135	yellow	yellow
THAP9	C6orf120	0.000156	yellow	yellow
THAP9	C6orf89	0.001127	yellow	yellow
THAP9	CAPN6	0.000217	yellow	yellow
THAP9	CAPN7	0.009113	yellow	yellow
THAP9	CARMIL1	0.000632	yellow	yellow
THAP9	CASD1	0.001839	yellow	yellow
THAP9	CASKIN2	0.000731	yellow	yellow
THAP9	CAST	0.001398	yellow	yellow
THAP9	CBL	0.027021	yellow	yellow
THAP9	CBLB	0.001654	yellow	yellow
THAP9	CCAR1	0.016055	yellow	yellow
THAP9	CCDC117	0.002459	yellow	yellow
THAP9	CCDC121	0.003205	yellow	yellow
THAP9	CCDC149	0.001723	yellow	yellow
THAP9	CCDC171	0.000798	yellow	yellow
THAP9	CCDC183.AS1	0.001188	yellow	NA
THAP9	CCDC200	1.72e-05	yellow	yellow
THAP9	CCDC7	0.002532	yellow	yellow
THAP9	CCNT1	0.005784	yellow	yellow
THAP9	CCZ1B	0.000686	yellow	yellow
THAP9	CD2AP	0.000398	yellow	yellow
THAP9	CDC37L1	0.003592	yellow	yellow
THAP9	CDC42EP4	0.003174	yellow	yellow
THAP9	CDC5L	0.001553	yellow	yellow
THAP9	CDK13	0.004953	yellow	yellow
THAP9	CDK17	0.001476	yellow	yellow
THAP9	CDNF	0.001512	yellow	yellow
THAP9	CELF1	0.010006	yellow	yellow
THAP9	CELF2.AS1	1.28e-05	yellow	NA
THAP9	CENPBD1	0.002041	yellow	yellow
THAP9	CENPCP1	0.00012	yellow	yellow
THAP9	CEP104	0.006747	yellow	yellow
THAP9	CEP120	0.001243	yellow	yellow
THAP9	CEP162	0.001603	yellow	yellow
THAP9	CEP295	0.003688	yellow	yellow
THAP9	CFAP206	5.89e-06	yellow	yellow
THAP9	CFLAR	0.002453	yellow	yellow
THAP9	CGGBP1	0.004522	yellow	yellow
THAP9	CHD1	0.000952	yellow	yellow
THAP9	CHD2	0.007167	yellow	yellow
THAP9	CHD3	0.001094	yellow	yellow
THAP9	CHD4	0.017688	yellow	yellow
THAP9	CHD6	0.007345	yellow	yellow
THAP9	CHD8	0.021416	yellow	yellow
THAP9	CHD9	0.005363	yellow	yellow
THAP9	CHERP	0.002584	yellow	yellow
THAP9	CHM	0.01994	yellow	yellow
THAP9	CHMP3	0.008186	yellow	yellow
THAP9	CHTF8	0.001255	yellow	yellow
THAP9	CHUK	0.002969	yellow	yellow
THAP9	CHURC1	0.001717	yellow	yellow
THAP9	CIC	0.003394	yellow	yellow
THAP9	CITED2	0.003187	yellow	yellow
THAP9	CKAP5	0.000685	yellow	yellow
THAP9	CLASP2	0.035895	yellow	yellow
THAP9	CLCN7	3.9e-05	yellow	yellow
THAP9	CLHC1	0.00056	yellow	yellow
THAP9	CLINT1	0.000193	yellow	yellow
THAP9	CLIP1	0.000404	yellow	yellow
THAP9	CLPX	0.005169	yellow	yellow
THAP9	CMTM1	0.000602	yellow	yellow
THAP9	CMTM4	0.002456	yellow	yellow
THAP9	CMTR2	0.001498	yellow	yellow
THAP9	CNEP1R1	0.001085	yellow	yellow
THAP9	CNIH1	0.001137	yellow	yellow
THAP9	CNOT1	0.00698	yellow	yellow
THAP9	CNOT4	0.009368	yellow	yellow
THAP9	CNOT6	0.003687	yellow	yellow
THAP9	CNOT7	0.000359	yellow	yellow
THAP9	CNTLN	0.000752	yellow	yellow
THAP9	COG5	0.003863	yellow	yellow
THAP9	COIL	0.002706	yellow	yellow
THAP9	COL16A1	0.003967	yellow	yellow
THAP9	COL4A2.AS1	0.000122	yellow	NA
THAP9	COPB2	0.001748	yellow	yellow
THAP9	COQ10B	0.001217	yellow	yellow
THAP9	COX16	1.95e-05	yellow	yellow
THAP9	CPEB3	0.001769	yellow	yellow
THAP9	CPLANE1	0.007927	yellow	yellow
THAP9	CREBBP	0.009807	yellow	yellow
THAP9	CRK	0.001945	yellow	yellow
THAP9	CRKL	0.004294	yellow	yellow
THAP9	CRTC3	0.014884	yellow	yellow
THAP9	CSNK1G1	0.001046	yellow	yellow
THAP9	CSNK1G3	0.006918	yellow	yellow
THAP9	CSNK2A3	0.000415	yellow	yellow
THAP9	CSPG4P13	0.003891	yellow	yellow
THAP9	CSRNP3	0.001539	yellow	yellow
THAP9	CSTF2T	0.023471	yellow	yellow
THAP9	CTDSP2	0.01419	yellow	yellow
THAP9	CTDSPL2	0.009284	yellow	yellow
THAP9	CTNNB1	0.004495	yellow	yellow
THAP9	CTR9	0.003347	yellow	yellow
THAP9	CUL2	0.004764	yellow	yellow
THAP9	CUL3	0.008348	yellow	yellow
THAP9	CUL4B	0.004813	yellow	yellow
THAP9	CUL5	0.018696	yellow	yellow
THAP9	CWC22	0.006704	yellow	yellow
THAP9	CWF19L2	0.001806	yellow	yellow
THAP9	DAAM1	0.003266	yellow	yellow
THAP9	DCAF17	0.001211	yellow	yellow
THAP9	DCAF4	8.16e-05	yellow	yellow
THAP9	DCAF5	0.005148	yellow	yellow
THAP9	DCAF7	0.001199	yellow	yellow
THAP9	DCUN1D3	0.006216	yellow	yellow
THAP9	DCUN1D4	0.001203	yellow	yellow
THAP9	DDX18	0.001826	yellow	yellow
THAP9	DDX3X	0.018444	yellow	yellow
THAP9	DDX5	0.002076	yellow	yellow
THAP9	DEFB131B	7.46e-05	yellow	yellow
THAP9	DENND4C	0.012514	yellow	yellow
THAP9	DENND5A	0.000889	yellow	yellow
THAP9	DHX29	0.002617	yellow	yellow
THAP9	DHX36	0.012431	yellow	yellow
THAP9	DHX8	0.002131	yellow	yellow
THAP9	DIAPH2	0.006567	yellow	yellow
THAP9	DICER1	0.005736	yellow	yellow
THAP9	DIMT1	0.002412	yellow	yellow
THAP9	DIP2B	0.000383	yellow	yellow
THAP9	DIPK1A	4.55e-06	yellow	yellow
THAP9	DIS3L	0.003209	yellow	yellow
THAP9	DLAT	0.005885	yellow	yellow
THAP9	DMAC2L	0.003005	yellow	yellow
THAP9	DMXL1	0.006757	yellow	yellow
THAP9	DNAAF2	0.022847	yellow	yellow
THAP9	DNAJB14	0.006499	yellow	yellow
THAP9	DNAJC11	0.00592	yellow	yellow
THAP9	DNAJC13	0.002251	yellow	yellow
THAP9	DNAJC14	0.001178	yellow	yellow
THAP9	DNAJC16	0.000838	yellow	yellow
THAP9	DNAJC21	0.001097	yellow	yellow
THAP9	DNAJC24	0.005167	yellow	yellow
THAP9	DNAJC3	0.000224	yellow	yellow
THAP9	DOCK4.AS1	0.000214	yellow	NA
THAP9	DOCK9	0.003014	yellow	yellow
THAP9	DOP1A	0.005513	yellow	yellow
THAP9	DPP8	0.011109	yellow	yellow
THAP9	DPY19L2P3	0.002784	yellow	yellow
THAP9	DSP	0.008469	yellow	yellow
THAP9	DTWD2	0.001	yellow	yellow
THAP9	DTX3	0.000108	yellow	yellow
THAP9	DUSP11	0.005533	yellow	yellow
THAP9	DUSP19	0.000816	yellow	yellow
THAP9	DVL3	0.001305	yellow	yellow
THAP9	DYNC1LI2	0.016882	yellow	yellow
THAP9	DYRK1A	0.001565	yellow	yellow
THAP9	ECHDC1	1.64e-05	yellow	yellow
THAP9	EDC4	0.004119	yellow	yellow
THAP9	EEA1	0.002776	yellow	yellow
THAP9	EFR3A	0.003034	yellow	yellow
THAP9	EIF2AK4	0.001188	yellow	yellow
THAP9	EIF3A	0.001287	yellow	yellow
THAP9	EIF3L	0.000174	yellow	yellow
THAP9	EIF3LP3	0.001006	yellow	yellow
THAP9	EIF4E	0.001054	yellow	yellow
THAP9	EIF4E3	0.001541	yellow	yellow
THAP9	EIF4G2	0.003938	yellow	yellow
THAP9	EIF4G3	0.004681	yellow	yellow
THAP9	EIF4H	0.001358	yellow	yellow
THAP9	EIF5	0.000651	yellow	yellow
THAP9	ELF2	0.011197	yellow	yellow
THAP9	ELP4	0.018201	yellow	yellow
THAP9	EML1	0.000779	yellow	yellow
THAP9	ENOX2	0.000709	yellow	yellow
THAP9	ENTPD1.AS1	0.010536	yellow	NA
THAP9	ENTPD7	0.001701	yellow	yellow
THAP9	EP300	0.01217	yellow	yellow
THAP9	EPG5	0.002256	yellow	yellow
THAP9	ERBIN	0.009513	yellow	yellow
THAP9	ERCC4	0.002215	yellow	yellow
THAP9	ERCC6	0.01332	yellow	yellow
THAP9	ERLIN2	0.000445	yellow	yellow
THAP9	ESYT2	0.007422	yellow	yellow
THAP9	EXOC2	0.000438	yellow	yellow
THAP9	EXOC4	0.001114	yellow	yellow
THAP9	EXOC5	0.013899	yellow	yellow
THAP9	EXTL3	0.000135	yellow	yellow
THAP9	FAM104A	0.001435	yellow	yellow
THAP9	FAM126B	0.006314	yellow	yellow
THAP9	FAM133B	0.000209	yellow	yellow
THAP9	FAM161A	0.000714	yellow	yellow
THAP9	FAM168A	0.003749	yellow	yellow
THAP9	FAM168B	0.002405	yellow	yellow
THAP9	FAM172A	0.003067	yellow	yellow
THAP9	FAM193A	0.004302	yellow	yellow
THAP9	FAM199X	0.004744	yellow	yellow
THAP9	FAM217B	0.000402	yellow	yellow
THAP9	FAN1	0.003146	yellow	yellow
THAP9	FANCM	0.006478	yellow	yellow
THAP9	FASTKD2	0.003617	yellow	yellow
THAP9	FAT1	0.001367	yellow	yellow
THAP9	FBXL18	0.001092	yellow	yellow
THAP9	FBXL20	0.001617	yellow	yellow
THAP9	FBXL3	0.009487	yellow	yellow
THAP9	FBXO11	0.009976	yellow	yellow
THAP9	FBXO33	0.003612	yellow	yellow
THAP9	FBXO38	0.007794	yellow	yellow
THAP9	FBXO42	0.001629	yellow	yellow
THAP9	FCHO2	0.025558	yellow	yellow
THAP9	FEM1B	0.005039	yellow	yellow
THAP9	FER	0.002933	yellow	yellow
THAP9	FERMT2	0.00055	yellow	yellow
THAP9	FGD5.AS1	0.006684	yellow	NA
THAP9	FGF7P6	1.69e-05	yellow	yellow
THAP9	FICD	6e-05	yellow	yellow
THAP9	FITM2	0.002547	yellow	yellow
THAP9	FKBP10	5.58e-06	yellow	yellow
THAP9	FMR1	0.003815	yellow	yellow
THAP9	FOXK2	0.000293	yellow	yellow
THAP9	FOXN2	0.001732	yellow	yellow
THAP9	FOXN3	0.00266	yellow	yellow
THAP9	FOXO1	0.004465	yellow	yellow
THAP9	FOXO3B	0.001786	yellow	yellow
THAP9	FRK	0.000417	yellow	yellow
THAP9	FRMD6	0.000642	yellow	yellow
THAP9	FRYL	0.008807	yellow	yellow
THAP9	FTO	0.002619	yellow	yellow
THAP9	FUBP1	0.006062	yellow	yellow
THAP9	FUT10	0.007134	yellow	yellow
THAP9	FYCO1	0.013586	yellow	yellow
THAP9	FYTTD1	0.006006	yellow	yellow
THAP9	FZD5	0.002311	yellow	yellow
THAP9	G3BP2	0.030445	yellow	yellow
THAP9	GABPA	0.005524	yellow	yellow
THAP9	GALC	0.001051	yellow	yellow
THAP9	GCC1	0.000254	yellow	yellow
THAP9	GCC2	0.001431	yellow	yellow
THAP9	GCNT7	0.000833	yellow	yellow
THAP9	GCOM1	0.013124	yellow	yellow
THAP9	GFM1	0.002963	yellow	yellow
THAP9	GID4	0.002019	yellow	yellow
THAP9	GIN1	0.003653	yellow	yellow
THAP9	GIT2	0.000666	yellow	yellow
THAP9	GLYR1	0.004311	yellow	yellow
THAP9	GMPR2	0.001601	yellow	yellow
THAP9	GNA13	0.003121	yellow	yellow
THAP9	GNL3L	0.013283	yellow	yellow
THAP9	GOLGA4	0.018637	yellow	yellow
THAP9	GOLGA7	0.002246	yellow	yellow
THAP9	GOLGA8N	1.6e-05	yellow	yellow
THAP9	GOLM2	0.000771	yellow	yellow
THAP9	GOSR1	0.006977	yellow	yellow
THAP9	GPATCH2L	0.002528	yellow	yellow
THAP9	GPATCH8	0.025967	yellow	yellow
THAP9	GPR135	3.4e-05	yellow	yellow
THAP9	GPR180	0.0007	yellow	yellow
THAP9	GPR75	0.000993	yellow	yellow
THAP9	GPRASP2	0.003571	yellow	yellow
THAP9	GSK3B	0.00401	yellow	yellow
THAP9	GSTCD	0.000819	yellow	yellow
THAP9	GTF2H3	2.99e-05	yellow	yellow
THAP9	GTF2I	0.017957	yellow	yellow
THAP9	GTF2IP5	0.000397	yellow	yellow
THAP9	GTF2IP9	0.000391	yellow	yellow
THAP9	GTF2IRD1P1	7.92e-05	yellow	yellow
THAP9	GTF3C1	0.001021	yellow	yellow
THAP9	GTF3C3	0.006208	yellow	yellow
THAP9	GTPBP10	0.000629	yellow	yellow
THAP9	GUSBP2	0.000353	yellow	yellow
THAP9	HAUS2	0.004451	yellow	yellow
THAP9	HBP1	0.034141	yellow	yellow
THAP9	HCFC1	0.004103	yellow	yellow
THAP9	HEATR5B	0.009554	yellow	yellow
THAP9	HECTD1	0.034568	yellow	yellow
THAP9	HERC2	0.005818	yellow	yellow
THAP9	HERPUD2	0.000697	yellow	yellow
THAP9	HFE	0.000108	yellow	yellow
THAP9	HIP1	0.001746	yellow	yellow
THAP9	HIPK3	0.010737	yellow	yellow
THAP9	HIVEP2	0.002944	yellow	yellow
THAP9	HMG20A	0.009758	yellow	yellow
THAP9	HMGCR	0.003157	yellow	yellow
THAP9	HMGXB4	0.001611	yellow	yellow
THAP9	HP1BP3	0.003624	yellow	yellow
THAP9	HSD17B12	0.000124	yellow	yellow
THAP9	HSPA13	0.00016	yellow	yellow
THAP9	HSPA8	0.000318	yellow	yellow
THAP9	HTATSF1	0.002686	yellow	yellow
THAP9	IBTK	7.24e-05	yellow	yellow
THAP9	ICE1	0.000262	yellow	yellow
THAP9	IFNAR1	0.001316	yellow	yellow
THAP9	IFT74	0.002074	yellow	yellow
THAP9	IL13RA1	0.000215	yellow	yellow
THAP9	IL6ST	0.000271	yellow	yellow
THAP9	IMPG1	0.007364	yellow	yellow
THAP9	ING3	0.003669	yellow	yellow
THAP9	INO80	0.007426	yellow	yellow
THAP9	INPP4A	0.000277	yellow	yellow
THAP9	INTS6	0.012737	yellow	yellow
THAP9	INTS6P1	0.001578	yellow	yellow
THAP9	INVS	0.003593	yellow	yellow
THAP9	IPO11	0.004293	yellow	yellow
THAP9	IPO7	0.00136	yellow	yellow
THAP9	IPO8	0.00409	yellow	yellow
THAP9	IQGAP1	0.001239	yellow	yellow
THAP9	IREB2	0.015676	yellow	yellow
THAP9	ISOC1	5.64e-05	yellow	yellow
THAP9	ITCH	0.025131	yellow	yellow
THAP9	ITFG1	0.000361	yellow	yellow
THAP9	ITGA1	0.001729	yellow	yellow
THAP9	ITM2BP1	6.42e-05	yellow	yellow
THAP9	ITPRIPL2	0.007657	yellow	yellow
THAP9	ITSN2	0.004411	yellow	yellow
THAP9	JADE3	0.002806	yellow	yellow
THAP9	JMJD7	0.008478	yellow	yellow
THAP9	JMY	0.011734	yellow	yellow
THAP9	KANSL1	0.009383	yellow	yellow
THAP9	KAT6A	0.044855	yellow	yellow
THAP9	KAT6B	0.038225	yellow	yellow
THAP9	KAT7	0.016923	yellow	yellow
THAP9	KATNIP	0.013569	yellow	yellow
THAP9	KAZN	0.004267	yellow	yellow
THAP9	KBTBD2	0.006793	yellow	yellow
THAP9	KCMF1	0.000163	yellow	yellow
THAP9	KCNS3	0.000919	yellow	yellow
THAP9	KCTD18	0.015842	yellow	yellow
THAP9	KCTD20	0.005056	yellow	yellow
THAP9	KDELR2	5.16e-05	yellow	yellow
THAP9	KDM1B	0.000917	yellow	yellow
THAP9	KDM3A	0.003396	yellow	yellow
THAP9	KDM5C	0.002738	yellow	yellow
THAP9	KDM6A	0.003717	yellow	yellow
THAP9	KDM6B	0.004485	yellow	yellow
THAP9	KEAP1	0.000127	yellow	yellow
THAP9	KIAA0586	0.010908	yellow	yellow
THAP9	KIAA0825	0.005384	yellow	yellow
THAP9	KIAA1109	0.011559	yellow	yellow
THAP9	KIAA1958	0.000779	yellow	yellow
THAP9	KIDINS220	0.014771	yellow	yellow
THAP9	KIF16B	0.005194	yellow	yellow
THAP9	KIF21A	0.000642	yellow	yellow
THAP9	KIF5B	0.025412	yellow	yellow
THAP9	KLF13	0.002046	yellow	yellow
THAP9	KLF3	0.001926	yellow	yellow
THAP9	KLHDC10	0.002927	yellow	yellow
THAP9	KLHDC2	0.014725	yellow	yellow
THAP9	KLHL11	0.024149	yellow	yellow
THAP9	KLHL24	0.003315	yellow	yellow
THAP9	KLHL25	0.000484	yellow	yellow
THAP9	KLHL28	0.023777	yellow	yellow
THAP9	KLHL31	0.000116	yellow	yellow
THAP9	KLLN	0.000632	yellow	yellow
THAP9	KMT2A	0.032407	yellow	yellow
THAP9	KMT2C	0.026447	yellow	yellow
THAP9	KMT2D	0.013117	yellow	yellow
THAP9	KMT2E	0.018689	yellow	yellow
THAP9	KRAS	0.002524	yellow	yellow
THAP9	KRCC1	0.001111	yellow	yellow
THAP9	KTN1	0.001421	yellow	yellow
THAP9	L2HGDH	0.005073	yellow	yellow
THAP9	LACC1	0.006207	yellow	yellow
THAP9	LARP1B	0.001094	yellow	yellow
THAP9	LARP7P2	8.99e-06	yellow	yellow
THAP9	LARS2	0.006889	yellow	yellow
THAP9	LCOR	0.006339	yellow	yellow
THAP9	LETM1	1.76e-05	yellow	yellow
THAP9	LGR4	0.000502	yellow	yellow
THAP9	LIN54	0.019778	yellow	yellow
THAP9	LINC00654	0.002624	yellow	yellow
THAP9	LINC01058	0.003132	yellow	yellow
THAP9	LINC01265	1.61e-05	yellow	yellow
THAP9	LINC01534	0.00053	yellow	yellow
THAP9	LINC01847	2.78e-05	yellow	yellow
THAP9	LINC01948	0.002265	yellow	yellow
THAP9	LINC02762	0.004072	yellow	yellow
THAP9	LNPK	0.003316	yellow	yellow
THAP9	LOC100129503	0.00118	yellow	yellow
THAP9	LOC100130691	0.005601	yellow	yellow
THAP9	LOC100419515	0.01861	yellow	yellow
THAP9	LOC100422382	0.005634	yellow	yellow
THAP9	LOC100422622	0.000725	yellow	yellow
THAP9	LOC100505715	0.002182	yellow	yellow
THAP9	LOC100506321	0.000881	yellow	yellow
THAP9	LOC101927060	0.000127	yellow	yellow
THAP9	LOC101929162	0.000995	yellow	yellow
THAP9	LOC102723809	0.000426	yellow	yellow
THAP9	LOC105376171	0.000152	yellow	yellow
THAP9	LOC283922	0.002378	yellow	yellow
THAP9	LOC284685	0.002298	yellow	yellow
THAP9	LOC641695	1.06e-05	yellow	yellow
THAP9	LOC645266	8.41e-05	yellow	yellow
THAP9	LOC652276	0.001303	yellow	yellow
THAP9	LOC732229	0.006358	yellow	yellow
THAP9	LOC84214	0.000336	yellow	yellow
THAP9	LONRF3	0.000493	yellow	yellow
THAP9	LPP	0.013394	yellow	yellow
THAP9	LRBA	0.015276	yellow	yellow
THAP9	LRCH3	0.004874	yellow	yellow
THAP9	LRIG2	0.000423	yellow	yellow
THAP9	LRRC1	1.09e-05	yellow	yellow
THAP9	LRRC37A15P	0.007644	yellow	yellow
THAP9	LRRC57	0.00865	yellow	yellow
THAP9	LTN1	0.012857	yellow	yellow
THAP9	LYSMD2	7.01e-05	yellow	yellow
THAP9	LYSMD4	0.000477	yellow	yellow
THAP9	LYST	0.007832	yellow	yellow
THAP9	MADD	0.00255	yellow	yellow
THAP9	MADD.AS1	0.001451	yellow	NA
THAP9	MAML1	0.013766	yellow	yellow
THAP9	MAML2	0.013009	yellow	yellow
THAP9	MAP2K4	0.00168	yellow	yellow
THAP9	MAP2K4P1	0.000351	yellow	yellow
THAP9	MAP3K2	0.002275	yellow	yellow
THAP9	MAP4	0.004583	yellow	yellow
THAP9	MAP9	0.000571	yellow	yellow
THAP9	MAPK1	0.0039	yellow	yellow
THAP9	MAPK6	0.000128	yellow	yellow
THAP9	MAPKBP1	0.006882	yellow	yellow
THAP9	MARCHF7	0.003756	yellow	yellow
THAP9	MARCHF8	0.006815	yellow	yellow
THAP9	MARVELD2	0.000183	yellow	yellow
THAP9	MATR3	0.002319	yellow	yellow
THAP9	MAVS	0.000341	yellow	yellow
THAP9	MBD5	0.006617	yellow	yellow
THAP9	MBIP	0.004462	yellow	yellow
THAP9	MBLAC2	0.003432	yellow	yellow
THAP9	MBTPS1	0.005295	yellow	yellow
THAP9	ME2	0.001442	yellow	yellow
THAP9	MED1	0.013348	yellow	yellow
THAP9	MED12	0.006717	yellow	yellow
THAP9	MED13	0.007984	yellow	yellow
THAP9	MED13L	0.011943	yellow	yellow
THAP9	MED14	0.005292	yellow	yellow
THAP9	MED17	0.001912	yellow	yellow
THAP9	MED21	0.009503	yellow	yellow
THAP9	MED28P3	0.001637	yellow	yellow
THAP9	MEF2A	0.006226	yellow	yellow
THAP9	MET	5.76e-05	yellow	yellow
THAP9	METAP1	0.004234	yellow	yellow
THAP9	METTL14	0.002826	yellow	yellow
THAP9	METTL15	0.009971	yellow	yellow
THAP9	MEX3C	0.004927	yellow	yellow
THAP9	MFAP3	0.00547	yellow	yellow
THAP9	MFAP3L	8.28e-06	yellow	yellow
THAP9	MFN1	0.005283	yellow	yellow
THAP9	MFSD9	0.007118	yellow	yellow
THAP9	MGA	0.012129	yellow	yellow
THAP9	MGAT2	0.006464	yellow	yellow
THAP9	MGAT5	0.000387	yellow	yellow
THAP9	MIDEAS	0.003697	yellow	yellow
THAP9	MIER3	0.012138	yellow	yellow
THAP9	MINDY2	0.00304	yellow	yellow
THAP9	MINK1	0.002244	yellow	yellow
THAP9	MIOS	0.000591	yellow	yellow
THAP9	MIR148B	0.000186	yellow	yellow
THAP9	MIR3138	0.000149	yellow	yellow
THAP9	MIR4450	0.000908	yellow	yellow
THAP9	MIR4767	0.000136	yellow	yellow
THAP9	MIR548AM	3.52e-05	yellow	yellow
THAP9	MIR5587	0.000271	yellow	yellow
THAP9	MIR579	0.000162	yellow	yellow
THAP9	MIR590	7.84e-05	yellow	yellow
THAP9	MKLN1	0.013331	yellow	yellow
THAP9	MLH1	0.004916	yellow	yellow
THAP9	MLLT10	0.027294	yellow	yellow
THAP9	MMAA	0.007112	yellow	yellow
THAP9	MON1B	0.005259	yellow	yellow
THAP9	MON2	0.008753	yellow	yellow
THAP9	MPDZ	0.002713	yellow	yellow
THAP9	MRPL19	0.000757	yellow	yellow
THAP9	MRTFB	0.011041	yellow	yellow
THAP9	MSH3	0.00199	yellow	yellow
THAP9	MSI2	0.003131	yellow	yellow
THAP9	MTM1	0.01417	yellow	yellow
THAP9	MTMR1	0.00224	yellow	yellow
THAP9	MTMR10	0.003487	yellow	yellow
THAP9	MTMR12	0.001349	yellow	yellow
THAP9	MTMR4	0.000392	yellow	yellow
THAP9	MTMR9	0.007953	yellow	yellow
THAP9	MTPN	0.00029	yellow	yellow
THAP9	MTREX	0.009868	yellow	yellow
THAP9	MTURN	0.00228	yellow	yellow
THAP9	MXI1	0.006792	yellow	yellow
THAP9	MYCBP2	0.004851	yellow	yellow
THAP9	MYO6	0.002405	yellow	yellow
THAP9	MYZAP	0.004862	yellow	yellow
THAP9	N4BP1	0.001509	yellow	yellow
THAP9	N4BP2	0.000132	yellow	yellow
THAP9	NAA30	0.005544	yellow	yellow
THAP9	NAB1	0.004327	yellow	yellow
THAP9	NAB2	0.003317	yellow	yellow
THAP9	NAPB	0.004001	yellow	yellow
THAP9	NBAS	0.001359	yellow	yellow
THAP9	NBEAL1	0.013621	yellow	yellow
THAP9	NBPF1	0.000629	yellow	yellow
THAP9	NBPF3	0.002303	yellow	yellow
THAP9	NBR1	0.001892	yellow	yellow
THAP9	NCKAP1	0.006335	yellow	yellow
THAP9	NCOA6	0.016563	yellow	yellow
THAP9	NCOR1	0.007361	yellow	yellow
THAP9	NDFIP2	0.000118	yellow	yellow
THAP9	NEBL	0.0019	yellow	yellow
THAP9	NEMF	0.027282	yellow	yellow
THAP9	NEXN	0.000424	yellow	yellow
THAP9	NF1	0.015299	yellow	yellow
THAP9	NFAT5	0.000994	yellow	yellow
THAP9	NFATC3	0.005252	yellow	yellow
THAP9	NFE2L2	0.002694	yellow	yellow
THAP9	NFKB1	0.00148	yellow	yellow
THAP9	NFXL1	0.004112	yellow	yellow
THAP9	NHEJ1	0.003934	yellow	yellow
THAP9	NHLRC3	0.000304	yellow	yellow
THAP9	NHSL2	0.000869	yellow	yellow
THAP9	NID2	0.000922	yellow	yellow
THAP9	NIPAL1	0.00127	yellow	yellow
THAP9	NIPAL2	0.006737	yellow	yellow
THAP9	NIPBL	0.003452	yellow	yellow
THAP9	NKIRAS1	0.001043	yellow	yellow
THAP9	NLN	0.000555	yellow	yellow
THAP9	NMD3	0.002419	yellow	yellow
THAP9	NNAT	0.001408	yellow	yellow
THAP9	NOMO3	0.001029	yellow	yellow
THAP9	NPAT	0.013495	yellow	yellow
THAP9	NPTN.IT1	0.003855	yellow	NA
THAP9	NR1D1	0.002083	yellow	yellow
THAP9	NR2C2	0.029503	yellow	yellow
THAP9	NRDE2	0.001902	yellow	yellow
THAP9	NRIP1	0.001396	yellow	yellow
THAP9	NRSN1	0.003828	yellow	yellow
THAP9	NSF	0.000927	yellow	yellow
THAP9	NT5C1B	0.000714	yellow	yellow
THAP9	NT5C2	0.013095	yellow	yellow
THAP9	NUDCD2	0.000143	yellow	yellow
THAP9	NUFIP2	0.003947	yellow	yellow
THAP9	NUP153	0.006795	yellow	yellow
THAP9	NUP155	0.000328	yellow	yellow
THAP9	NUP160	0.007406	yellow	yellow
THAP9	NUP98	0.002687	yellow	yellow
THAP9	NXT2	0.000161	yellow	yellow
THAP9	OCLN	0.000944	yellow	yellow
THAP9	OCRL	0.007753	yellow	yellow
THAP9	OFD1	0.001653	yellow	yellow
THAP9	OPA1	0.001477	yellow	yellow
THAP9	OPHN1	0.000709	yellow	yellow
THAP9	OR9I3P	1.25e-05	yellow	yellow
THAP9	ORC2	0.001467	yellow	yellow
THAP9	OSBPL8	0.003503	yellow	yellow
THAP9	OTUD4	0.011076	yellow	yellow
THAP9	OXA1L	7.93e-05	yellow	yellow
THAP9	P2RY4	0.004729	yellow	yellow
THAP9	PAK3	0.000838	yellow	yellow
THAP9	PARD3B	0.008059	yellow	yellow
THAP9	PARP4	0.001073	yellow	yellow
THAP9	PARP4P1	0.000356	yellow	yellow
THAP9	PARP4P2	0.000641	yellow	yellow
THAP9	PARP6	0.00083	yellow	yellow
THAP9	PCBP1	0.00126	yellow	yellow
THAP9	PCF11	0.010093	yellow	yellow
THAP9	PCNT	0.001174	yellow	yellow
THAP9	PCSK7	0.003873	yellow	yellow
THAP9	PCYT1A	0.000677	yellow	yellow
THAP9	PDE11A	0.000232	yellow	yellow
THAP9	PDE11A.AS1	0.000658	yellow	NA
THAP9	PDE12	0.005219	yellow	yellow
THAP9	PDHX	0.001105	yellow	yellow
THAP9	PDP2	0.006071	yellow	yellow
THAP9	PDPK1	0.048878	yellow	yellow
THAP9	PDPR	0.001591	yellow	yellow
THAP9	PDS5A	0.000244	yellow	yellow
THAP9	PDSS2	0.00032	yellow	yellow
THAP9	PDXDC1	0.003151	yellow	yellow
THAP9	PEAK1	0.001237	yellow	yellow
THAP9	PER2	0.00164	yellow	yellow
THAP9	PGAP1	0.004219	yellow	yellow
THAP9	PGAP6	7.51e-06	yellow	yellow
THAP9	PGGT1B	0.002463	yellow	yellow
THAP9	PGRMC2	4.46e-05	yellow	yellow
THAP9	PHACTR2	0.007893	yellow	yellow
THAP9	PHC3	0.018641	yellow	yellow
THAP9	PHF21A	0.010214	yellow	yellow
THAP9	PHF3	0.006188	yellow	yellow
THAP9	PHIP	0.001042	yellow	yellow
THAP9	PHLDB1	0.000519	yellow	yellow
THAP9	PHLDB2	0.032856	yellow	yellow
THAP9	PI4KA	0.009285	yellow	yellow
THAP9	PIAS1	0.003966	yellow	yellow
THAP9	PICALM	0.004744	yellow	yellow
THAP9	PIGS	0.002786	yellow	yellow
THAP9	PIK3C2A	0.008815	yellow	yellow
THAP9	PIK3CA	0.021899	yellow	yellow
THAP9	PIK3CB	0.00138	yellow	yellow
THAP9	PIK3R4	0.010996	yellow	yellow
THAP9	PIKFYVE	0.009498	yellow	yellow
THAP9	PIP4K2C	0.003111	yellow	yellow
THAP9	PKD1	0.005622	yellow	yellow
THAP9	PKD1P3	0.012485	yellow	yellow
THAP9	PKD1P6	0.003937	yellow	yellow
THAP9	PLEKHA1	0.00391	yellow	yellow
THAP9	PLEKHH1	0.000285	yellow	yellow
THAP9	PLEKHM3	0.022156	yellow	yellow
THAP9	PLPP1	0.000211	yellow	yellow
THAP9	PMPCB	0.000793	yellow	yellow
THAP9	PMS2	0.000926	yellow	yellow
THAP9	PNPT1	0.000549	yellow	yellow
THAP9	PNRC1	0.000637	yellow	yellow
THAP9	POLA1	0.009325	yellow	yellow
THAP9	POLK	0.004748	yellow	yellow
THAP9	POLR2A	0.007789	yellow	yellow
THAP9	POLR2D	0.000553	yellow	yellow
THAP9	POLR2M	0.000816	yellow	yellow
THAP9	POM121	0.000381	yellow	yellow
THAP9	POMK	0.022632	yellow	yellow
THAP9	PPFIA1P1	0.001729	yellow	yellow
THAP9	PPID	0.000849	yellow	yellow
THAP9	PPIG	0.008704	yellow	yellow
THAP9	PPIP5K2	0.00534	yellow	yellow
THAP9	PPM1A	0.014746	yellow	yellow
THAP9	PPM1B	1.84e-05	yellow	yellow
THAP9	PPM1D	0.000808	yellow	yellow
THAP9	PPP1R12A	0.009493	yellow	yellow
THAP9	PPP1R21	0.000596	yellow	yellow
THAP9	PPP1R9A	0.000234	yellow	yellow
THAP9	PPP4R3B	0.009727	yellow	yellow
THAP9	PRDM10	0.027899	yellow	yellow
THAP9	PREPL	0.000385	yellow	yellow
THAP9	PRICKLE3	0.000842	yellow	yellow
THAP9	PRKAR2A	0.010544	yellow	yellow
THAP9	PRKDC	0.001953	yellow	yellow
THAP9	PRMT3	0.00166	yellow	yellow
THAP9	PRMT9	0.004711	yellow	yellow
THAP9	PRORP	0.001065	yellow	yellow
THAP9	PRPF4B	0.00407	yellow	yellow
THAP9	PRPF8	0.002832	yellow	yellow
THAP9	PRRC2B	0.020321	yellow	yellow
THAP9	PRRG4	0.00151	yellow	yellow
THAP9	PSMD1	0.000216	yellow	yellow
THAP9	PTCD3	0.000102	yellow	yellow
THAP9	PTENP1	0.018218	yellow	yellow
THAP9	PTP4A1	0.000514	yellow	yellow
THAP9	PTPN21	0.004941	yellow	yellow
THAP9	PTPN4	0.003039	yellow	yellow
THAP9	PTPRK	0.002252	yellow	yellow
THAP9	PUM2	0.008659	yellow	yellow
THAP9	PURA	0.016061	yellow	yellow
THAP9	PUS10	0.000478	yellow	yellow
THAP9	PWAR5	0.000348	yellow	yellow
THAP9	QKI	0.001229	yellow	yellow
THAP9	QSER1	0.006869	yellow	yellow
THAP9	R3HDM1	0.000914	yellow	yellow
THAP9	R3HDM2	0.006381	yellow	yellow
THAP9	RAB11FIP4	0.00049	yellow	yellow
THAP9	RAB18	0.00568	yellow	yellow
THAP9	RAB21	0.002954	yellow	yellow
THAP9	RAB2B	0.003132	yellow	yellow
THAP9	RAB33B	0.004542	yellow	yellow
THAP9	RAB3GAP1	0.003473	yellow	yellow
THAP9	RAB9A	0.00479	yellow	yellow
THAP9	RABEP1	0.001312	yellow	yellow
THAP9	RAD23BP1	0.00104	yellow	yellow
THAP9	RAD54L2	0.009216	yellow	yellow
THAP9	RAF1	0.008044	yellow	yellow
THAP9	RALGAPA1	0.049955	yellow	yellow
THAP9	RALGAPA1P1	0.038168	yellow	yellow
THAP9	RANBP2	0.008113	yellow	yellow
THAP9	RANBP6	0.009331	yellow	yellow
THAP9	RAP2A	0.000647	yellow	yellow
THAP9	RAP2C.AS1	0.004482	yellow	NA
THAP9	RAPGEF2	0.008223	yellow	yellow
THAP9	RASEF	7.49e-05	yellow	yellow
THAP9	RAVER1	0.000715	yellow	yellow
THAP9	RB1	0.000984	yellow	yellow
THAP9	RBAK	0.00617	yellow	yellow
THAP9	RBBP4P4	4.51e-05	yellow	yellow
THAP9	RBBP6	0.008653	yellow	yellow
THAP9	RBBP8	0.003041	yellow	yellow
THAP9	RBL2	0.01242	yellow	yellow
THAP9	RBM12B	0.005948	yellow	yellow
THAP9	RBM12B.AS1	0.001541	yellow	NA
THAP9	RBM15	0.000243	yellow	yellow
THAP9	RBM28	0.000356	yellow	yellow
THAP9	RBM39P1	0.000164	yellow	yellow
THAP9	RBM41	0.00543	yellow	yellow
THAP9	RBM7	0.000373	yellow	yellow
THAP9	RBSN	0.022073	yellow	yellow
THAP9	RC3H1	0.005639	yellow	yellow
THAP9	RCHY1	0.075822	yellow	yellow
THAP9	RDX	0.002261	yellow	yellow
THAP9	REL	0.004043	yellow	yellow
THAP9	REST	0.022333	yellow	yellow
THAP9	REV1	0.007375	yellow	yellow
THAP9	REV3L	0.013491	yellow	yellow
THAP9	RFC1	0.001191	yellow	yellow
THAP9	RFX1	0.002478	yellow	yellow
THAP9	RFX7	0.002014	yellow	yellow
THAP9	RGPD8	0.002338	yellow	yellow
THAP9	RHOT1	0.005825	yellow	yellow
THAP9	RIC1	0.005717	yellow	yellow
THAP9	RIF1	0.005774	yellow	yellow
THAP9	RINT1	0.001069	yellow	yellow
THAP9	RIOK2	0.001089	yellow	yellow
THAP9	RIPK1	0.001165	yellow	yellow
THAP9	RMDN2	0.001701	yellow	yellow
THAP9	RMND5A	0.003598	yellow	yellow
THAP9	RN7SKP116	0.000956	yellow	yellow
THAP9	RN7SKP70	0.002113	yellow	yellow
THAP9	RN7SL130P	8.51e-05	yellow	yellow
THAP9	RN7SL163P	0.000172	yellow	yellow
THAP9	RN7SL181P	0.000534	yellow	yellow
THAP9	RN7SL381P	0.003946	yellow	yellow
THAP9	RN7SL535P	0.001081	yellow	yellow
THAP9	RN7SL81P	0.000264	yellow	yellow
THAP9	RNA5SP203	0.000286	yellow	yellow
THAP9	RNA5SP29	9.08e-06	yellow	yellow
THAP9	RNA5SP311	0.00045	yellow	yellow
THAP9	RNA5SP317	0.005019	yellow	yellow
THAP9	RNA5SP322	0.000127	yellow	yellow
THAP9	RNA5SP434	0.000448	yellow	yellow
THAP9	RNA5SP465	0.000175	yellow	yellow
THAP9	RNF111	0.008508	yellow	yellow
THAP9	RNF123	0.020192	yellow	yellow
THAP9	RNF146	0.004513	yellow	yellow
THAP9	RNF169	0.015841	yellow	yellow
THAP9	RNF20	0.003925	yellow	yellow
THAP9	RNF213	6.02e-05	yellow	yellow
THAP9	RNF214	0.006464	yellow	yellow
THAP9	RNF40	0.004766	yellow	yellow
THAP9	RNU1.63P	0.000149	yellow	NA
THAP9	RNU2.70P	0.002214	yellow	NA
THAP9	RNU6.1205P	6.28e-05	yellow	NA
THAP9	RNU6.1231P	0.000913	yellow	NA
THAP9	RNU6.125P	4e-05	yellow	NA
THAP9	RNU6.282P	0.001776	yellow	NA
THAP9	RNU6.323P	0.003543	yellow	NA
THAP9	RNU6.531P	0.000641	yellow	NA
THAP9	RNU6.689P	8.55e-05	yellow	NA
THAP9	ROCK1	0.035607	yellow	yellow
THAP9	RP2	0.001272	yellow	yellow
THAP9	RPE	0.000163	yellow	yellow
THAP9	RPL23AP14	0.000604	yellow	yellow
THAP9	RPL37P12	0.001474	yellow	yellow
THAP9	RPL6P24	0.000362	yellow	yellow
THAP9	RPL7AP16	0.002439	yellow	yellow
THAP9	RPL7AP42	6.86e-07	yellow	yellow
THAP9	RPL7L1	0.000343	yellow	yellow
THAP9	RPL7P57	0.000369	yellow	yellow
THAP9	RPS15AP16	0.000576	yellow	yellow
THAP9	RPS2P16	0.000424	yellow	yellow
THAP9	RPS3AP38	0.00881	yellow	yellow
THAP9	RPS6KA6	0.000227	yellow	yellow
THAP9	RRAGB	0.001679	yellow	yellow
THAP9	RREB1	0.002184	yellow	yellow
THAP9	RSBN1L	0.028897	yellow	yellow
THAP9	RSF1	0.030332	yellow	yellow
THAP9	RSPH3	0.002505	yellow	yellow
THAP9	RSRC1	0.000882	yellow	yellow
THAP9	RTEL1	0.021015	yellow	yellow
THAP9	RTF1	0.004156	yellow	yellow
THAP9	RTL6	0.00157	yellow	yellow
THAP9	RXRA	0.00122	yellow	yellow
THAP9	RYBP	0.007924	yellow	yellow
THAP9	SACM1L	0.006843	yellow	yellow
THAP9	SAP130	0.001113	yellow	yellow
THAP9	SATB1	0.001622	yellow	yellow
THAP9	SBF2	0.027784	yellow	yellow
THAP9	SC5D	0.00052	yellow	yellow
THAP9	SCAF4	0.000796	yellow	yellow
THAP9	SCAMP1	0.016818	yellow	yellow
THAP9	SCAPER	0.026026	yellow	yellow
THAP9	SEC14L6	0.000995	yellow	yellow
THAP9	SEC23IP	0.000495	yellow	yellow
THAP9	SEC24B	0.026466	yellow	yellow
THAP9	SEC24C	0.013147	yellow	yellow
THAP9	SEC62	0.001723	yellow	yellow
THAP9	SECISBP2L	0.018551	yellow	yellow
THAP9	SELENOI	0.001701	yellow	yellow
THAP9	SELENOT	0.001789	yellow	yellow
THAP9	SEMA4F	0.000686	yellow	yellow
THAP9	SEMA6A.AS1	0.000231	yellow	NA
THAP9	SENP1	0.00126	yellow	yellow
THAP9	SENP2	0.00307	yellow	yellow
THAP9	SENP5	0.002817	yellow	yellow
THAP9	SEPTIN10	0.002228	yellow	yellow
THAP9	SEPTIN4.AS1	0.000101	yellow	NA
THAP9	SERINC1	0.004164	yellow	yellow
THAP9	SETD2	0.030374	yellow	yellow
THAP9	SETD3	0.00055	yellow	yellow
THAP9	SETD7	0.001824	yellow	yellow
THAP9	SETSIP	0.000994	yellow	yellow
THAP9	SF3A1	0.001508	yellow	yellow
THAP9	SF3B1	0.00786	yellow	yellow
THAP9	SGCB	0.000567	yellow	yellow
THAP9	SGPP2	0.001552	yellow	yellow
THAP9	SH3YL1	0.004578	yellow	yellow
THAP9	SHPRH	0.015601	yellow	yellow
THAP9	SIK2	0.000951	yellow	yellow
THAP9	SIK3	0.001374	yellow	yellow
THAP9	SIMC1	0.000918	yellow	yellow
THAP9	SIN3A	0.002067	yellow	yellow
THAP9	SLAIN2	0.003182	yellow	yellow
THAP9	SLC10A7	0.005564	yellow	yellow
THAP9	SLC11A2	0.000726	yellow	yellow
THAP9	SLC13A4	0.002432	yellow	yellow
THAP9	SLC22A5	7.26e-05	yellow	yellow
THAP9	SLC23A2	0.001576	yellow	yellow
THAP9	SLC25A36	0.00191	yellow	yellow
THAP9	SLC2A10	0.00105	yellow	yellow
THAP9	SLC2A12	0.000582	yellow	yellow
THAP9	SLC2AXP1	8.92e-05	yellow	yellow
THAP9	SLC30A1	0.000368	yellow	yellow
THAP9	SLC30A7	5.1e-05	yellow	yellow
THAP9	SLC35A1	0.000395	yellow	yellow
THAP9	SLC35A5	0.000601	yellow	yellow
THAP9	SLC35E2B	0.000454	yellow	yellow
THAP9	SLC35F5	0.000918	yellow	yellow
THAP9	SLC5A4.AS1	0.000324	yellow	NA
THAP9	SLC9A6	0.008372	yellow	yellow
THAP9	SLF1	0.000118	yellow	yellow
THAP9	SLK	0.010147	yellow	yellow
THAP9	SLMAP	0.01432	yellow	yellow
THAP9	SLTM	0.011626	yellow	yellow
THAP9	SMARCA2	0.005849	yellow	yellow
THAP9	SMARCAD1	0.002195	yellow	yellow
THAP9	SMC1A	0.001648	yellow	yellow
THAP9	SMC6	0.000974	yellow	yellow
THAP9	SMCR8	0.002757	yellow	yellow
THAP9	SMG1	0.018898	yellow	yellow
THAP9	SMG1P5	0.006485	yellow	yellow
THAP9	SMG6	0.004789	yellow	yellow
THAP9	SMG8	0.002255	yellow	yellow
THAP9	SMIM15	0.001279	yellow	yellow
THAP9	SNAP23	0.007104	yellow	yellow
THAP9	SNAPC3	0.00705	yellow	yellow
THAP9	SNORA38	0.000486	yellow	yellow
THAP9	SNORA70H	1.65e-05	yellow	yellow
THAP9	SNORD116.2	2.77e-05	yellow	NA
THAP9	SNORD63	4.25e-05	yellow	yellow
THAP9	SNRK	0.007367	yellow	yellow
THAP9	SNRNP200	0.003521	yellow	yellow
THAP9	SNRPCP6	0.000223	yellow	yellow
THAP9	SNX1	0.005071	yellow	yellow
THAP9	SNX13	0.020825	yellow	yellow
THAP9	SNX16	0.012106	yellow	yellow
THAP9	SNX3	9e-05	yellow	yellow
THAP9	SNX30	0.008122	yellow	yellow
THAP9	SNX4	0.001117	yellow	yellow
THAP9	SOCS5	0.024242	yellow	yellow
THAP9	SON	0.009609	yellow	yellow
THAP9	SOS1	0.002827	yellow	yellow
THAP9	SOS2	0.015736	yellow	yellow
THAP9	SOWAHB	0.00229	yellow	yellow
THAP9	SP100	0.000361	yellow	yellow
THAP9	SP2	0.004862	yellow	yellow
THAP9	SP3	0.015707	yellow	yellow
THAP9	SPAG9	0.001866	yellow	yellow
THAP9	SPART	0.000457	yellow	yellow
THAP9	SPATA32	0.000201	yellow	yellow
THAP9	SPATA7	0.000103	yellow	yellow
THAP9	SPEN	0.034149	yellow	yellow
THAP9	SPG11	0.001813	yellow	yellow
THAP9	SPIN3	0.006324	yellow	yellow
THAP9	SPIRE2	0.000286	yellow	yellow
THAP9	SPOP	0.000501	yellow	yellow
THAP9	SPPL2A	0.001835	yellow	yellow
THAP9	SPRED1	0.005091	yellow	yellow
THAP9	SPTY2D1	0.005359	yellow	yellow
THAP9	SRBD1	0.000776	yellow	yellow
THAP9	SREK1	0.008095	yellow	yellow
THAP9	SREK1IP1	7.96e-05	yellow	yellow
THAP9	SRFBP1	0.006474	yellow	yellow
THAP9	SRGAP1	0.000644	yellow	yellow
THAP9	SRP54	0.017283	yellow	yellow
THAP9	SRPK2	0.005396	yellow	yellow
THAP9	SRPRA	0.000751	yellow	yellow
THAP9	ST13	0.000102	yellow	yellow
THAP9	STAG1	0.019276	yellow	yellow
THAP9	STAG2	0.034117	yellow	yellow
THAP9	STAM2	0.011579	yellow	yellow
THAP9	STAT3	0.001133	yellow	yellow
THAP9	STAT5B	0.001629	yellow	yellow
THAP9	STPG2.AS1	0.002225	yellow	NA
THAP9	STRN	0.001564	yellow	yellow
THAP9	STRN3	0.013419	yellow	yellow
THAP9	STX17	0.028942	yellow	yellow
THAP9	STYX	0.002617	yellow	yellow
THAP9	SUCLA2	0.001176	yellow	yellow
THAP9	SVIL.AS1	0.002523	yellow	NA
THAP9	SWAP70	0.000594	yellow	yellow
THAP9	SYNJ1	0.005779	yellow	yellow
THAP9	TADA2B	0.000482	yellow	yellow
THAP9	TAF1	0.006652	yellow	yellow
THAP9	TAF1B	0.00336	yellow	yellow
THAP9	TAF5	0.001376	yellow	yellow
THAP9	TAF9B	0.008959	yellow	yellow
THAP9	TAOK1	0.031035	yellow	yellow
THAP9	TAOK2	0.003242	yellow	yellow
THAP9	TAOK3	0.002674	yellow	yellow
THAP9	TASOR2	0.042999	yellow	yellow
THAP9	TAX1BP1	0.001376	yellow	yellow
THAP9	TBC1D17	0.000152	yellow	yellow
THAP9	TBC1D22B	0.000997	yellow	yellow
THAP9	TBC1D9	0.001096	yellow	yellow
THAP9	TBCCD1	0.011352	yellow	yellow
THAP9	TBCEL	0.005879	yellow	yellow
THAP9	TCAF1	0.007143	yellow	yellow
THAP9	TCAF1P1	0.019827	yellow	yellow
THAP9	TCF12	0.002929	yellow	yellow
THAP9	TDRP	0.000279	yellow	yellow
THAP9	TEC	0.000318	yellow	yellow
THAP9	TECPR2	0.007144	yellow	yellow
THAP9	TENT4B	0.003353	yellow	yellow
THAP9	TET2	0.002761	yellow	yellow
THAP9	TEX2	0.002966	yellow	yellow
THAP9	TFCP2	0.000999	yellow	yellow
THAP9	TFRC	1.3e-05	yellow	yellow
THAP9	TGOLN2	0.004003	yellow	yellow
THAP9	TGS1	0.004656	yellow	yellow
THAP9	THAP5	0.017153	yellow	yellow
THAP9	THAP6	0.058407	yellow	yellow
THAP9	THOC2	0.008147	yellow	yellow
THAP9	THUMPD1	0.006554	yellow	yellow
THAP9	TICAM2	0.000932	yellow	yellow
THAP9	TIMM10B	0.001087	yellow	yellow
THAP9	TIMM23B.AGAP6	0.003243	yellow	NA
THAP9	TIRAP	0.008899	yellow	yellow
THAP9	TJP1	0.01398	yellow	yellow
THAP9	TLK1	0.004548	yellow	yellow
THAP9	TLK2P1	5.33e-05	yellow	yellow
THAP9	TLN2	3.21e-05	yellow	yellow
THAP9	TM9SF1	0.004508	yellow	yellow
THAP9	TMEM106B	7.53e-05	yellow	yellow
THAP9	TMEM161B	0.00101	yellow	yellow
THAP9	TMEM168	0.003473	yellow	yellow
THAP9	TMEM18	0.000463	yellow	yellow
THAP9	TMEM184C	0.00997	yellow	yellow
THAP9	TMEM19	2.63e-05	yellow	yellow
THAP9	TMEM192	0.004495	yellow	yellow
THAP9	TMEM209	0.000803	yellow	yellow
THAP9	TMEM260	0.00333	yellow	yellow
THAP9	TMEM87A	0.002763	yellow	yellow
THAP9	TMLHE	0.002804	yellow	yellow
THAP9	TMOD3	0.004409	yellow	yellow
THAP9	TMPPE	0.003939	yellow	yellow
THAP9	TMX1	0.004671	yellow	yellow
THAP9	TNK1	0.002291	yellow	yellow
THAP9	TNPO3	0.001291	yellow	yellow
THAP9	TNRC6A	0.019117	yellow	yellow
THAP9	TNRC6B	0.003136	yellow	yellow
THAP9	TNS1	0.0089	yellow	yellow
THAP9	TOB2	0.000929	yellow	yellow
THAP9	TOM1L1	0.002715	yellow	yellow
THAP9	TOMM70	0.000271	yellow	yellow
THAP9	TOP1	0.000935	yellow	yellow
THAP9	TOPBP1	0.001065	yellow	yellow
THAP9	TOX4	0.016605	yellow	yellow
THAP9	TP53BP1	0.00267	yellow	yellow
THAP9	TP53INP1	0.000165	yellow	yellow
THAP9	TPI1P2	9.35e-05	yellow	yellow
THAP9	TRAF6	0.018005	yellow	yellow
THAP9	TRAF7	0.00072	yellow	yellow
THAP9	TRAPPC10	0.009029	yellow	yellow
THAP9	TRAPPC11	0.013182	yellow	yellow
THAP9	TRAPPC6B	0.01097	yellow	yellow
THAP9	TRIB1	0.001423	yellow	yellow
THAP9	TRIM2	0.003056	yellow	yellow
THAP9	TRIM23	0.000801	yellow	yellow
THAP9	TRIM25	0.001021	yellow	yellow
THAP9	TRIM66	0.001076	yellow	yellow
THAP9	TRIM68	0.000489	yellow	yellow
THAP9	TRIO	0.000547	yellow	yellow
THAP9	TRIP11	0.002329	yellow	yellow
THAP9	TRIP12	0.00367	yellow	yellow
THAP9	TRMT11	0.001338	yellow	yellow
THAP9	TRMT44	0.001072	yellow	yellow
THAP9	TRPM7	0.004623	yellow	yellow
THAP9	TRRAP	0.003019	yellow	yellow
THAP9	TSC22D2	0.005281	yellow	yellow
THAP9	TSPYL1	0.000592	yellow	yellow
THAP9	TSPYL4	0.007226	yellow	yellow
THAP9	TSSK5P	0.001199	yellow	yellow
THAP9	TSTD2	0.022448	yellow	yellow
THAP9	TTC21B	0.015412	yellow	yellow
THAP9	TTC37	0.017319	yellow	yellow
THAP9	TTLL5	0.000361	yellow	yellow
THAP9	TUB	0.000639	yellow	yellow
THAP9	TULP4	0.001379	yellow	yellow
THAP9	TUT7	0.004253	yellow	yellow
THAP9	TXLNG	0.001479	yellow	yellow
THAP9	UBA5	0.002148	yellow	yellow
THAP9	UBE2Q2P1	0.007323	yellow	yellow
THAP9	UBE2V1	0.002896	yellow	yellow
THAP9	UBE3A	0.002077	yellow	yellow
THAP9	UBE3C	0.003934	yellow	yellow
THAP9	UBE4A	0.011722	yellow	yellow
THAP9	UBL7.AS1	0.000335	yellow	NA
THAP9	UBLCP1	0.00012	yellow	yellow
THAP9	UBN1	0.015293	yellow	yellow
THAP9	UBQLN2	0.001549	yellow	yellow
THAP9	UBR1	0.006043	yellow	yellow
THAP9	UBR2	0.008084	yellow	yellow
THAP9	UBR3	0.014995	yellow	yellow
THAP9	UBR4	0.005847	yellow	yellow
THAP9	UBR5	0.030009	yellow	yellow
THAP9	UBXN4	0.004082	yellow	yellow
THAP9	UBXN7	0.035718	yellow	yellow
THAP9	UHRF1BP1	0.000657	yellow	yellow
THAP9	ULK2	0.001812	yellow	yellow
THAP9	UMAD1	0.001533	yellow	yellow
THAP9	UNC50	0.002222	yellow	yellow
THAP9	UPF2	0.014945	yellow	yellow
THAP9	UPRT	0.000561	yellow	yellow
THAP9	URB1	0.000476	yellow	yellow
THAP9	URB2	0.001014	yellow	yellow
THAP9	USF3	0.009918	yellow	yellow
THAP9	USO1	0.036528	yellow	yellow
THAP9	USP11	2.41e-05	yellow	yellow
THAP9	USP12	0.004301	yellow	yellow
THAP9	USP16	0.007739	yellow	yellow
THAP9	USP25	0.001963	yellow	yellow
THAP9	USP31	0.001393	yellow	yellow
THAP9	USP34	0.006726	yellow	yellow
THAP9	USP36	0.000177	yellow	yellow
THAP9	USP37	0.009602	yellow	yellow
THAP9	USP38	0.007311	yellow	yellow
THAP9	USP40	7.87e-05	yellow	yellow
THAP9	USP42	0.001957	yellow	yellow
THAP9	USP47	0.027065	yellow	yellow
THAP9	USP53	0.005269	yellow	yellow
THAP9	USP8	0.003779	yellow	yellow
THAP9	USP9X	0.005027	yellow	yellow
THAP9	VAMP7	0.001323	yellow	yellow
THAP9	VAPA	0.000349	yellow	yellow
THAP9	VLDLR	0.000163	yellow	yellow
THAP9	VN1R103P	2.58e-05	yellow	yellow
THAP9	VN1R108P	0.000266	yellow	yellow
THAP9	VPS13C	0.004365	yellow	yellow
THAP9	VPS13D	0.006633	yellow	yellow
THAP9	VPS26B	0.001656	yellow	yellow
THAP9	VPS26C	0.000667	yellow	yellow
THAP9	VPS35L	0.000902	yellow	yellow
THAP9	VPS37A	0.000787	yellow	yellow
THAP9	VPS39	0.001746	yellow	yellow
THAP9	VWA8	0.001108	yellow	yellow
THAP9	VWDE	0.000368	yellow	yellow
THAP9	WASF1	0.000975	yellow	yellow
THAP9	WASHC2A	0.001718	yellow	yellow
THAP9	WASL	0.003599	yellow	yellow
THAP9	WDCP	0.000143	yellow	yellow
THAP9	WDFY3	0.007949	yellow	yellow
THAP9	WDPCP	0.009422	yellow	yellow
THAP9	WDR11	0.0045	yellow	yellow
THAP9	WDR17	0.002424	yellow	yellow
THAP9	WDR19	0.001351	yellow	yellow
THAP9	WDR20	0.005063	yellow	yellow
THAP9	WDR35	0.002086	yellow	yellow
THAP9	WDR48	0.016109	yellow	yellow
THAP9	WDR59	0.003647	yellow	yellow
THAP9	WDR7	0.005066	yellow	yellow
THAP9	WIPF2	0.006881	yellow	yellow
THAP9	WNK1	0.042498	yellow	yellow
THAP9	WRN	0.012461	yellow	yellow
THAP9	WWOX	0.000624	yellow	yellow
THAP9	XIAP	0.01826	yellow	yellow
THAP9	XPC	0.01139	yellow	yellow
THAP9	XPO7	0.003114	yellow	yellow
THAP9	XRCC4	0.000308	yellow	yellow
THAP9	YAP1	0.007076	yellow	yellow
THAP9	YIPF4	0.000898	yellow	yellow
THAP9	YIPF6	0.001612	yellow	yellow
THAP9	YPEL2	0.000329	yellow	yellow
THAP9	YTHDC2	0.004913	yellow	yellow
THAP9	YY2	0.000648	yellow	yellow
THAP9	ZBTB14	0.000919	yellow	yellow
THAP9	ZBTB20.AS4	0.022286	yellow	NA
THAP9	ZBTB21	0.001718	yellow	yellow
THAP9	ZBTB33	0.005945	yellow	yellow
THAP9	ZBTB39	0.007462	yellow	yellow
THAP9	ZC3H12B	0.000796	yellow	yellow
THAP9	ZC3H7A	0.015704	yellow	yellow
THAP9	ZC3HAV1L	0.001484	yellow	yellow
THAP9	ZCCHC9	0.0003	yellow	yellow
THAP9	ZCWPW2	0.002352	yellow	yellow
THAP9	ZDBF2	0.001069	yellow	yellow
THAP9	ZFAND5	0.002359	yellow	yellow
THAP9	ZFHX3	0.010942	yellow	yellow
THAP9	ZFP14	0.002797	yellow	yellow
THAP9	ZFP28	0.001004	yellow	yellow
THAP9	ZFP30	0.001483	yellow	yellow
THAP9	ZFR	0.00501	yellow	yellow
THAP9	ZFYVE1	0.003661	yellow	yellow
THAP9	ZFYVE26	0.001918	yellow	yellow
THAP9	ZKSCAN7	0.00037	yellow	yellow
THAP9	ZKSCAN7.AS1	0.000936	yellow	NA
THAP9	ZMAT3	0.000447	yellow	yellow
THAP9	ZNF106	0.006754	yellow	yellow
THAP9	ZNF12	0.002176	yellow	yellow
THAP9	ZNF131	0.000713	yellow	yellow
THAP9	ZNF142	0.002877	yellow	yellow
THAP9	ZNF148	0.014759	yellow	yellow
THAP9	ZNF155	0.007106	yellow	yellow
THAP9	ZNF17	0.001266	yellow	yellow
THAP9	ZNF175	0.00185	yellow	yellow
THAP9	ZNF180	0.008177	yellow	yellow
THAP9	ZNF197	0.033523	yellow	yellow
THAP9	ZNF2	0.002058	yellow	yellow
THAP9	ZNF207	0.003244	yellow	yellow
THAP9	ZNF217	0.009079	yellow	yellow
THAP9	ZNF221	0.009418	yellow	yellow
THAP9	ZNF253	0.000223	yellow	yellow
THAP9	ZNF277	0.000121	yellow	yellow
THAP9	ZNF28	0.000679	yellow	yellow
THAP9	ZNF280D	0.003892	yellow	yellow
THAP9	ZNF304	0.00319	yellow	yellow
THAP9	ZNF319	0.000273	yellow	yellow
THAP9	ZNF322	0.003592	yellow	yellow
THAP9	ZNF33A	0.004601	yellow	yellow
THAP9	ZNF345	0.001345	yellow	yellow
THAP9	ZNF354A	0.000432	yellow	yellow
THAP9	ZNF354C	0.002445	yellow	yellow
THAP9	ZNF37A	0.005957	yellow	yellow
THAP9	ZNF398	0.010379	yellow	yellow
THAP9	ZNF41	0.013426	yellow	yellow
THAP9	ZNF420	0.00277	yellow	yellow
THAP9	ZNF429	0.004849	yellow	yellow
THAP9	ZNF436	0.004624	yellow	yellow
THAP9	ZNF443	0.001243	yellow	yellow
THAP9	ZNF445	0.026123	yellow	yellow
THAP9	ZNF449	0.000315	yellow	yellow
THAP9	ZNF45	0.016056	yellow	yellow
THAP9	ZNF451	0.001224	yellow	yellow
THAP9	ZNF460	0.001138	yellow	yellow
THAP9	ZNF468	0.001034	yellow	yellow
THAP9	ZNF470	0.001911	yellow	yellow
THAP9	ZNF471	4.99e-05	yellow	yellow
THAP9	ZNF483	0.000773	yellow	yellow
THAP9	ZNF484	0.016542	yellow	yellow
THAP9	ZNF490	0.009004	yellow	yellow
THAP9	ZNF507	0.005255	yellow	yellow
THAP9	ZNF510	0.027004	yellow	yellow
THAP9	ZNF527	0.008282	yellow	yellow
THAP9	ZNF543	0.001543	yellow	yellow
THAP9	ZNF559.ZNF177	0.000154	yellow	NA
THAP9	ZNF566	0.00921	yellow	yellow
THAP9	ZNF567	0.006207	yellow	yellow
THAP9	ZNF568	0.003825	yellow	yellow
THAP9	ZNF569	0.000825	yellow	yellow
THAP9	ZNF570	0.00229	yellow	yellow
THAP9	ZNF573	0.01178	yellow	yellow
THAP9	ZNF585A	0.007582	yellow	yellow
THAP9	ZNF585B	0.003773	yellow	yellow
THAP9	ZNF587	0.000498	yellow	yellow
THAP9	ZNF592	0.003481	yellow	yellow
THAP9	ZNF597	0.00232	yellow	yellow
THAP9	ZNF608	0.004066	yellow	yellow
THAP9	ZNF609	0.006322	yellow	yellow
THAP9	ZNF611	0.002416	yellow	yellow
THAP9	ZNF615	0.003906	yellow	yellow
THAP9	ZNF616	0.001349	yellow	yellow
THAP9	ZNF619	0.028806	yellow	yellow
THAP9	ZNF621	0.004268	yellow	yellow
THAP9	ZNF638	0.006339	yellow	yellow
THAP9	ZNF674	0.006141	yellow	yellow
THAP9	ZNF675	0.00079	yellow	yellow
THAP9	ZNF714	0.000427	yellow	yellow
THAP9	ZNF718	0.002042	yellow	yellow
THAP9	ZNF720	0.009514	yellow	yellow
THAP9	ZNF721	0.001325	yellow	yellow
THAP9	ZNF724	0.000302	yellow	yellow
THAP9	ZNF75D	0.00425	yellow	yellow
THAP9	ZNF770	0.019303	yellow	yellow
THAP9	ZNF774	0.00114	yellow	yellow
THAP9	ZNF776	0.009816	yellow	yellow
THAP9	ZNF780B	0.00597	yellow	yellow
THAP9	ZNF782	0.008562	yellow	yellow
THAP9	ZNF791	0.005568	yellow	yellow
THAP9	ZNF800	0.016339	yellow	yellow
THAP9	ZNF805	0.002774	yellow	yellow
THAP9	ZNF81	0.018207	yellow	yellow
THAP9	ZNF829	0.002048	yellow	yellow
THAP9	ZNF852	0.019485	yellow	yellow
THAP9	ZNF91	0.002457	yellow	yellow
THAP9	ZSCAN22	0.002753	yellow	yellow
THAP9	ZSCAN29	0.005244	yellow	yellow
THAP9	ZSCAN32	0.012178	yellow	yellow
THAP9	ZSWIM6	0.014426	yellow	yellow
THAP9	ZXDA	0.007952	yellow	yellow
THAP9	ZZEF1	0.008177	yellow	yellow

## Sheet: COAD_normal
gene1	gene2	correlation	module1	module2
THAP9	AASDHPPT	0.02113	royalblue	royalblue
THAP9	ABCB7	0.023572	royalblue	royalblue
THAP9	ABRAXAS2	0.02039	royalblue	royalblue
THAP9	ACTR8	0.008659	royalblue	royalblue
THAP9	AKAP10	0.006723	royalblue	royalblue
THAP9	ALDH6A1	0.000798	royalblue	royalblue
THAP9	ALG10B	0.005745	royalblue	royalblue
THAP9	ALKBH1	0.008214	royalblue	royalblue
THAP9	ANAPC4	0.00837	royalblue	royalblue
THAP9	ANGEL2	0.029172	royalblue	royalblue
THAP9	API5	0.019821	royalblue	royalblue
THAP9	ARMCX5	0.022029	royalblue	royalblue
THAP9	ARNT	0.003931	royalblue	royalblue
THAP9	ATE1.AS1	2.95e-06	royalblue	NA
THAP9	ATF2	0.008703	royalblue	royalblue
THAP9	ATP6AP2	0.010566	royalblue	royalblue
THAP9	ATXN3	0.003417	royalblue	royalblue
THAP9	ATXN7L3B	0.032781	royalblue	royalblue
THAP9	B3GLCT	0.001145	royalblue	royalblue
THAP9	BAG4	0.0023	royalblue	royalblue
THAP9	BDNF.AS	0.003312	royalblue	NA
THAP9	BLOC1S5	0.009151	royalblue	royalblue
THAP9	BMP4	1.21e-05	royalblue	royalblue
THAP9	BRS3	8.13e-06	royalblue	royalblue
THAP9	C12orf65	0.002377	royalblue	royalblue
THAP9	C12orf76	0.00127	royalblue	royalblue
THAP9	C16orf70	0.010264	royalblue	royalblue
THAP9	C8orf33	3.28e-06	royalblue	royalblue
THAP9	C9orf78	0.004719	royalblue	royalblue
THAP9	CALCR	1.26e-05	royalblue	royalblue
THAP9	CAPS2	1.97e-06	royalblue	royalblue
THAP9	CCDC174	0.012932	royalblue	royalblue
THAP9	CCDC196	2.5e-05	royalblue	royalblue
THAP9	CD302	0.000102	royalblue	royalblue
THAP9	CDC23	0.021082	royalblue	royalblue
THAP9	CDC40	0.029746	royalblue	royalblue
THAP9	CDKAL1	0.015984	royalblue	royalblue
THAP9	CENPC	0.002445	royalblue	royalblue
THAP9	CEP44	0.001182	royalblue	royalblue
THAP9	CEP57	0.029156	royalblue	royalblue
THAP9	CEPT1	0.006141	royalblue	royalblue
THAP9	CHRNB1	2.62e-05	royalblue	royalblue
THAP9	CLTRN	1.93e-08	royalblue	royalblue
THAP9	CNBD2	9.26e-07	royalblue	royalblue
THAP9	CNOT7	0.016468	royalblue	royalblue
THAP9	COG5	0.006749	royalblue	royalblue
THAP9	CPNE3	0.024358	royalblue	royalblue
THAP9	CREG1	0.001621	royalblue	royalblue
THAP9	CSNK1A1	0.00415	royalblue	royalblue
THAP9	CSTF1	0.030132	royalblue	royalblue
THAP9	DBR1	0.011909	royalblue	royalblue
THAP9	DDX1	0.00273	royalblue	royalblue
THAP9	DHX40	0.0117	royalblue	royalblue
THAP9	DNAJC21	0.002657	royalblue	royalblue
THAP9	DR1	0.009519	royalblue	royalblue
THAP9	EBLN3P	0.017785	royalblue	royalblue
THAP9	ECD	0.007342	royalblue	royalblue
THAP9	EDIL3	0.000722	royalblue	royalblue
THAP9	EEF1AKMT3	0.001343	royalblue	royalblue
THAP9	EEF1B2P2	0.00193	royalblue	royalblue
THAP9	EFNA3	1.27e-05	royalblue	royalblue
THAP9	EID2	0.001744	royalblue	royalblue
THAP9	EIF1B	0.000371	royalblue	royalblue
THAP9	EIF2A	0.017158	royalblue	royalblue
THAP9	EIF2B1	0.012872	royalblue	royalblue
THAP9	EIF2S3	0.010059	royalblue	royalblue
THAP9	EIF3H	0.023984	royalblue	royalblue
THAP9	EIF3J.DT	0.00091	royalblue	NA
THAP9	EIF3L	0.012704	royalblue	royalblue
THAP9	EIF4B	0.007136	royalblue	royalblue
THAP9	ELP2	0.015792	royalblue	royalblue
THAP9	ENPP5	0.000332	royalblue	royalblue
THAP9	EPHX1	0.001306	royalblue	royalblue
THAP9	ETAA1	0.001001	royalblue	royalblue
THAP9	ETFBKMT	0.00106	royalblue	royalblue
THAP9	ETV5	0.000254	royalblue	royalblue
THAP9	EXOC4	0.004902	royalblue	royalblue
THAP9	FAF1	0.00323	royalblue	royalblue
THAP9	FAM149B1	0.013147	royalblue	royalblue
THAP9	FAM66B	4.56e-07	royalblue	royalblue
THAP9	FBXL4	0.0138	royalblue	royalblue
THAP9	FBXO3	0.017088	royalblue	royalblue
THAP9	FBXO48	0.001181	royalblue	royalblue
THAP9	FCF1	0.018078	royalblue	royalblue
THAP9	FECH	0.001065	royalblue	royalblue
THAP9	FIG4	0.030116	royalblue	royalblue
THAP9	FSD1L	7.12e-05	royalblue	royalblue
THAP9	GAB1	0.000984	royalblue	royalblue
THAP9	GABPA	0.007397	royalblue	royalblue
THAP9	GCK	8.83e-06	royalblue	royalblue
THAP9	GOLM2	0.008903	royalblue	royalblue
THAP9	GOLPH3	0.005779	royalblue	royalblue
THAP9	GTF2E1	0.005911	royalblue	royalblue
THAP9	GTF3C3	0.026713	royalblue	royalblue
THAP9	HDAC2.AS2	0.000512	royalblue	NA
THAP9	HDAC3	0.014922	royalblue	royalblue
THAP9	HDHD2	0.014161	royalblue	royalblue
THAP9	HELQ	0.007503	royalblue	royalblue
THAP9	HEPACAM2	9.79e-05	royalblue	royalblue
THAP9	HHLA3	0.000232	royalblue	royalblue
THAP9	HMG20A	0.011707	royalblue	royalblue
THAP9	HNRNPLL	0.00259	royalblue	royalblue
THAP9	HOMEZ	0.001778	royalblue	royalblue
THAP9	HOXA5	0.000891	royalblue	royalblue
THAP9	HOXB5	0.00016	royalblue	royalblue
THAP9	HSDL2	0.012344	royalblue	royalblue
THAP9	HYLS1	0.002653	royalblue	royalblue
THAP9	IMPACT	0.017617	royalblue	royalblue
THAP9	IRF2BP2	0.002154	royalblue	royalblue
THAP9	ITFG2	0.006138	royalblue	royalblue
THAP9	ITGA9.AS1	0.002824	royalblue	NA
THAP9	KBTBD7	0.001841	royalblue	royalblue
THAP9	KCTD18	0.003708	royalblue	royalblue
THAP9	KLHL35	2.95e-06	royalblue	royalblue
THAP9	KLHL9	0.010624	royalblue	royalblue
THAP9	KLK1	0.00023	royalblue	royalblue
THAP9	LINC00339	0.001275	royalblue	royalblue
THAP9	LINC00847	7.23e-05	royalblue	royalblue
THAP9	LINC01013	1.06e-07	royalblue	royalblue
THAP9	LINC02424	3.71e-07	royalblue	royalblue
THAP9	LOC100128006	0.000234	royalblue	royalblue
THAP9	LOC100506083	9.86e-05	royalblue	royalblue
THAP9	LOC101927560	0.000137	royalblue	royalblue
THAP9	LOC101929140	1.86e-05	royalblue	royalblue
THAP9	LOC101929552	2.04e-06	royalblue	royalblue
THAP9	LOC105371592	0.001442	royalblue	royalblue
THAP9	LOC105374989	1.07e-06	royalblue	royalblue
THAP9	LOC105377623	1.65e-05	royalblue	royalblue
THAP9	LRTOMT	0.007436	royalblue	royalblue
THAP9	MAFTRR	6.53e-08	royalblue	royalblue
THAP9	MAP10	8.71e-06	royalblue	royalblue
THAP9	MBLAC2	0.002952	royalblue	royalblue
THAP9	MBTD1	0.010457	royalblue	royalblue
THAP9	MCPH1	0.025614	royalblue	royalblue
THAP9	MED17	0.008843	royalblue	royalblue
THAP9	MED20	0.019988	royalblue	royalblue
THAP9	MFF	0.010968	royalblue	royalblue
THAP9	MGME1	0.00585	royalblue	royalblue
THAP9	MIR23C	4.64e-10	royalblue	royalblue
THAP9	MKRN2	0.004071	royalblue	royalblue
THAP9	MKS1	0.007	royalblue	royalblue
THAP9	MMGT1	0.010102	royalblue	royalblue
THAP9	MORC3	0.006094	royalblue	royalblue
THAP9	MTDH	0.006597	royalblue	royalblue
THAP9	MTERF4	0.021063	royalblue	royalblue
THAP9	MTO1	0.007384	royalblue	royalblue
THAP9	MTRF1L	0.000558	royalblue	royalblue
THAP9	MYL3	1.31e-06	royalblue	royalblue
THAP9	MYLIP	0.000478	royalblue	royalblue
THAP9	NACA	0.019972	royalblue	royalblue
THAP9	NEPRO	0.015022	royalblue	royalblue
THAP9	NKAP	0.008809	royalblue	royalblue
THAP9	NKAPD1	0.028073	royalblue	royalblue
THAP9	NT5DC1	0.007863	royalblue	royalblue
THAP9	OIP5.AS1	0.008365	royalblue	NA
THAP9	ORC3	0.015506	royalblue	royalblue
THAP9	OSGEPL1	0.000723	royalblue	royalblue
THAP9	OXR1	0.002451	royalblue	royalblue
THAP9	PABPC1	0.012578	royalblue	royalblue
THAP9	PARP16	0.007643	royalblue	royalblue
THAP9	PCAT18	1.24e-06	royalblue	royalblue
THAP9	PDCL	0.015706	royalblue	royalblue
THAP9	PDIK1L	0.002955	royalblue	royalblue
THAP9	PHAX	0.013095	royalblue	royalblue
THAP9	PIGP	0.000344	royalblue	royalblue
THAP9	PIK3IP1	3.16e-05	royalblue	royalblue
THAP9	PLRG1	0.001842	royalblue	royalblue
THAP9	PMS2	0.00931	royalblue	royalblue
THAP9	POLR1D	0.005919	royalblue	royalblue
THAP9	POLR1E	0.002147	royalblue	royalblue
THAP9	POLR3C	0.018639	royalblue	royalblue
THAP9	PPIL6	0.000282	royalblue	royalblue
THAP9	PPP1R1C	3.64e-06	royalblue	royalblue
THAP9	PPP1R21	0.00685	royalblue	royalblue
THAP9	PPP1R3D	0.001561	royalblue	royalblue
THAP9	PPWD1	0.012479	royalblue	royalblue
THAP9	PRCP	0.001742	royalblue	royalblue
THAP9	PSMD5	0.005379	royalblue	royalblue
THAP9	PSMF1	0.008948	royalblue	royalblue
THAP9	PTPN4	0.007607	royalblue	royalblue
THAP9	PTPRN2	0.000567	royalblue	royalblue
THAP9	PUM2	0.009729	royalblue	royalblue
THAP9	RAD17	0.034928	royalblue	royalblue
THAP9	RAD21	0.008801	royalblue	royalblue
THAP9	RASSF1.AS1	1.45e-06	royalblue	NA
THAP9	RBBP9	0.004136	royalblue	royalblue
THAP9	RBL2	0.013202	royalblue	royalblue
THAP9	RBM18	0.005492	royalblue	royalblue
THAP9	RBM4	0.010034	royalblue	royalblue
THAP9	REEP5	0.008727	royalblue	royalblue
THAP9	REP15	7.22e-06	royalblue	royalblue
THAP9	RIMBP3B	1.12e-07	royalblue	royalblue
THAP9	RMDN1	0.001896	royalblue	royalblue
THAP9	RNA5SP202	1.61e-06	royalblue	royalblue
THAP9	RNF227	0.00038	royalblue	royalblue
THAP9	RNF32	0.002542	royalblue	royalblue
THAP9	RNU6.925P	4.18e-07	royalblue	NA
THAP9	RP9	0.01515	royalblue	royalblue
THAP9	RPL22	0.015024	royalblue	royalblue
THAP9	RPL6P10	0.006058	royalblue	royalblue
THAP9	RPL7	0.016496	royalblue	royalblue
THAP9	RPL7AP40	5.83e-06	royalblue	royalblue
THAP9	RPP14	0.000751	royalblue	royalblue
THAP9	RPS3AP29	1.33e-06	royalblue	royalblue
THAP9	RRM2B	0.007441	royalblue	royalblue
THAP9	RXRB	0.017922	royalblue	royalblue
THAP9	SCRN3	0.001959	royalblue	royalblue
THAP9	SDCCAG8	0.024832	royalblue	royalblue
THAP9	SDE2	0.002698	royalblue	royalblue
THAP9	SEPHS1	0.008895	royalblue	royalblue
THAP9	SESN1	0.001719	royalblue	royalblue
THAP9	SIAH2	0.012881	royalblue	royalblue
THAP9	SIKE1	0.032777	royalblue	royalblue
THAP9	SMG8	0.013774	royalblue	royalblue
THAP9	SMU1	0.011946	royalblue	royalblue
THAP9	SMYD3	0.003412	royalblue	royalblue
THAP9	SNHG7	6.6e-05	royalblue	royalblue
THAP9	SNHG8	0.013586	royalblue	royalblue
THAP9	SNW1	0.015183	royalblue	royalblue
THAP9	SNX2	0.003648	royalblue	royalblue
THAP9	SPATA7	0.000193	royalblue	royalblue
THAP9	SPDYE21	9.26e-09	royalblue	royalblue
THAP9	SPG21	0.001743	royalblue	royalblue
THAP9	TAB2	0.001753	royalblue	royalblue
THAP9	TCEA1	0.006116	royalblue	royalblue
THAP9	TCEANC	0.000714	royalblue	royalblue
THAP9	TFF3	2.87e-05	royalblue	royalblue
THAP9	TIAL1	0.014778	royalblue	royalblue
THAP9	TMEM123	0.000594	royalblue	royalblue
THAP9	TMEM159	2.31e-05	royalblue	royalblue
THAP9	TMEM167B	0.021757	royalblue	royalblue
THAP9	TMEM242	0.007166	royalblue	royalblue
THAP9	TMEM38A	5.88e-05	royalblue	royalblue
THAP9	TMEM69	0.028309	royalblue	royalblue
THAP9	TMEM99	0.00358	royalblue	royalblue
THAP9	TOMM20L	3.59e-06	royalblue	royalblue
THAP9	TPSG1	8.84e-07	royalblue	royalblue
THAP9	TRAK2	0.01264	royalblue	royalblue
THAP9	TRIM13	0.005191	royalblue	royalblue
THAP9	TRIM4	0.008476	royalblue	royalblue
THAP9	TRMT1L	0.003196	royalblue	royalblue
THAP9	TRMT2B	0.008004	royalblue	royalblue
THAP9	UBAP1	0.00552	royalblue	royalblue
THAP9	UGDH.AS1	0.00027	royalblue	NA
THAP9	UNC119B	0.008061	royalblue	royalblue
THAP9	URI1	0.024771	royalblue	royalblue
THAP9	USP21	0.006215	royalblue	royalblue
THAP9	VGLL4	0.006871	royalblue	royalblue
THAP9	VMA21	0.00882	royalblue	royalblue
THAP9	VPS35L	0.003009	royalblue	royalblue
THAP9	VPS41	0.014815	royalblue	royalblue
THAP9	VPS50	0.017817	royalblue	royalblue
THAP9	VPS54	0.010066	royalblue	royalblue
THAP9	VPS72	0.010801	royalblue	royalblue
THAP9	WDR11	0.024261	royalblue	royalblue
THAP9	WDR48	0.010808	royalblue	royalblue
THAP9	WEE2.AS1	6.15e-05	royalblue	NA
THAP9	WWP1	0.00992	royalblue	royalblue
THAP9	XRN2	0.011194	royalblue	royalblue
THAP9	YIPF6	0.002927	royalblue	royalblue
THAP9	ZADH2	0.002263	royalblue	royalblue
THAP9	ZBTB1	0.029464	royalblue	royalblue
THAP9	ZBTB3	0.000673	royalblue	royalblue
THAP9	ZBTB44	0.005678	royalblue	royalblue
THAP9	ZBTB44.DT	0.000296	royalblue	NA
THAP9	ZBTB6	0.005746	royalblue	royalblue
THAP9	ZC3H14	0.023068	royalblue	royalblue
THAP9	ZCCHC4	0.018461	royalblue	royalblue
THAP9	ZCCHC7	0.007828	royalblue	royalblue
THAP9	ZFP14	0.001261	royalblue	royalblue
THAP9	ZFP3	0.003599	royalblue	royalblue
THAP9	ZFP30	0.000567	royalblue	royalblue
THAP9	ZG16	9.59e-06	royalblue	royalblue
THAP9	ZKSCAN4	0.001031	royalblue	royalblue
THAP9	ZMYND12	5.14e-06	royalblue	royalblue
THAP9	ZNF112	0.003534	royalblue	royalblue
THAP9	ZNF12	0.022848	royalblue	royalblue
THAP9	ZNF14	0.001732	royalblue	royalblue
THAP9	ZNF175	0.000732	royalblue	royalblue
THAP9	ZNF184	0.014036	royalblue	royalblue
THAP9	ZNF19	0.000998	royalblue	royalblue
THAP9	ZNF2	0.002281	royalblue	royalblue
THAP9	ZNF214	0.000834	royalblue	royalblue
THAP9	ZNF224	0.000232	royalblue	royalblue
THAP9	ZNF225	0.004175	royalblue	royalblue
THAP9	ZNF226	0.002278	royalblue	royalblue
THAP9	ZNF227	0.005929	royalblue	royalblue
THAP9	ZNF230	0.001699	royalblue	royalblue
THAP9	ZNF252P	0.008811	royalblue	royalblue
THAP9	ZNF260	0.002571	royalblue	royalblue
THAP9	ZNF264	0.00227	royalblue	royalblue
THAP9	ZNF280D	0.002509	royalblue	royalblue
THAP9	ZNF284	0.000314	royalblue	royalblue
THAP9	ZNF302	0.000489	royalblue	royalblue
THAP9	ZNF322	0.002813	royalblue	royalblue
THAP9	ZNF329	0.000264	royalblue	royalblue
THAP9	ZNF33A	0.006522	royalblue	royalblue
THAP9	ZNF33B	0.008638	royalblue	royalblue
THAP9	ZNF347	0.00318	royalblue	royalblue
THAP9	ZNF350	0.000536	royalblue	royalblue
THAP9	ZNF383	0.001506	royalblue	royalblue
THAP9	ZNF395	0.003016	royalblue	royalblue
THAP9	ZNF419	6.18e-05	royalblue	royalblue
THAP9	ZNF432	0.000624	royalblue	royalblue
THAP9	ZNF45	0.007985	royalblue	royalblue
THAP9	ZNF484	0.013391	royalblue	royalblue
THAP9	ZNF491	4.94e-06	royalblue	royalblue
THAP9	ZNF529.AS1	4.31e-06	royalblue	NA
THAP9	ZNF543	0.000702	royalblue	royalblue
THAP9	ZNF551	0.009585	royalblue	royalblue
THAP9	ZNF555	0.000103	royalblue	royalblue
THAP9	ZNF563	0.000184	royalblue	royalblue
THAP9	ZNF565	0.003593	royalblue	royalblue
THAP9	ZNF567	0.000411	royalblue	royalblue
THAP9	ZNF571	0.001019	royalblue	royalblue
THAP9	ZNF572	0.001323	royalblue	royalblue
THAP9	ZNF606	0.0028	royalblue	royalblue
THAP9	ZNF607	0.004016	royalblue	royalblue
THAP9	ZNF610	1.11e-06	royalblue	royalblue
THAP9	ZNF613	9.83e-05	royalblue	royalblue
THAP9	ZNF616	0.005007	royalblue	royalblue
THAP9	ZNF619	0.007943	royalblue	royalblue
THAP9	ZNF620	0.012382	royalblue	royalblue
THAP9	ZNF623	0.003683	royalblue	royalblue
THAP9	ZNF670	0.000173	royalblue	royalblue
THAP9	ZNF717	0.003466	royalblue	royalblue
THAP9	ZNF718	1.81e-05	royalblue	royalblue
THAP9	ZNF737	0.001871	royalblue	royalblue
THAP9	ZNF740	0.008355	royalblue	royalblue
THAP9	ZNF763	0.001226	royalblue	royalblue
THAP9	ZNF766	0.004554	royalblue	royalblue
THAP9	ZNF772	7.87e-07	royalblue	royalblue
THAP9	ZNF773	0.000318	royalblue	royalblue
THAP9	ZNF780A	0.002766	royalblue	royalblue
THAP9	ZNF791	0.012026	royalblue	royalblue
THAP9	ZNF792	0.000572	royalblue	royalblue
THAP9	ZNF813	0.015645	royalblue	royalblue
THAP9	ZNF836	0.002988	royalblue	royalblue
THAP9	ZNF844	0.000259	royalblue	royalblue
THAP9	ZNF92	0.003908	royalblue	royalblue
THAP9	ZSCAN12	0.001696	royalblue	royalblue
THAP9	ZSCAN21	0.002641	royalblue	royalblue
THAP9	ZXDB	0.002197	royalblue	royalblue
THAP9	ZZZ3	0.024732	royalblue	royalblue

## Sheet: COAD_tumor
gene1	gene2	correlation	module1	module2
THAP9	A1CF	0.000759	yellow	yellow
THAP9	AASS	0.000307	yellow	yellow
THAP9	ABALON	3.86e-06	yellow	yellow
THAP9	ABCA13	1.18e-08	yellow	yellow
THAP9	ABCA5	0.000508	yellow	yellow
THAP9	ABCC4	0.000344	yellow	yellow
THAP9	ABHD18	0.024066	yellow	yellow
THAP9	ABI2	0.003319	yellow	yellow
THAP9	ABL2	0.007075	yellow	yellow
THAP9	ABRAXAS1	0.002881	yellow	yellow
THAP9	ACAD11	0.002257	yellow	yellow
THAP9	ACAP2	0.023738	yellow	yellow
THAP9	ACER3	0.001282	yellow	yellow
THAP9	ACSL4	0.000766	yellow	yellow
THAP9	ACVR1C	1.61e-05	yellow	yellow
THAP9	ACVR2A	0.003974	yellow	yellow
THAP9	ACVR2B	0.002235	yellow	yellow
THAP9	ADAM10	0.003471	yellow	yellow
THAP9	ADAM17	0.00809	yellow	yellow
THAP9	ADAM22	0.000305	yellow	yellow
THAP9	ADGB	6.46e-07	yellow	yellow
THAP9	ADGRF5P1	2.89e-11	yellow	yellow
THAP9	ADGRL3	7.28e-06	yellow	yellow
THAP9	AEBP2	0.012197	yellow	yellow
THAP9	AFF1	0.007902	yellow	yellow
THAP9	AFF4	0.008776	yellow	yellow
THAP9	AGFG1	0.017243	yellow	yellow
THAP9	AGL	0.007642	yellow	yellow
THAP9	AGO1	0.002522	yellow	yellow
THAP9	AGO2	0.002682	yellow	yellow
THAP9	AGO3	0.004487	yellow	yellow
THAP9	AGO4	0.00445	yellow	yellow
THAP9	AGPS	0.018552	yellow	yellow
THAP9	AGTPBP1	0.008131	yellow	yellow
THAP9	AHCTF1	0.015966	yellow	yellow
THAP9	AHI1	0.007623	yellow	yellow
THAP9	AHNAK	0.000378	yellow	yellow
THAP9	AHR	0.0004	yellow	yellow
THAP9	AIDAP2	4.69e-06	yellow	yellow
THAP9	AK3P3	0.000105	yellow	yellow
THAP9	AKAP10	0.001024	yellow	yellow
THAP9	AKAP11	0.003637	yellow	yellow
THAP9	AKAP9	0.006522	yellow	yellow
THAP9	AKR1E2	5.8e-06	yellow	yellow
THAP9	ALCAM	0.000206	yellow	yellow
THAP9	ALG10	0.00724	yellow	yellow
THAP9	ALG10B	0.001304	yellow	yellow
THAP9	ALG13	0.000971	yellow	yellow
THAP9	ALMS1	0.016513	yellow	yellow
THAP9	ALPK1	0.004465	yellow	yellow
THAP9	ALS2	0.003052	yellow	yellow
THAP9	AMPD3	0.000215	yellow	yellow
THAP9	ANAPC1	0.016448	yellow	yellow
THAP9	ANGEL2	0.01016	yellow	yellow
THAP9	ANGPT2	0.000104	yellow	yellow
THAP9	ANK3	0.003132	yellow	yellow
THAP9	ANKAR	0.001694	yellow	yellow
THAP9	ANKFN1	6.36e-10	yellow	yellow
THAP9	ANKHD1	0.002389	yellow	yellow
THAP9	ANKIB1	0.014331	yellow	yellow
THAP9	ANKRD12	0.001569	yellow	yellow
THAP9	ANKRD13A	0.00313	yellow	yellow
THAP9	ANKRD13C	0.022827	yellow	yellow
THAP9	ANKRD17	0.017711	yellow	yellow
THAP9	ANKRD18A	0.000303	yellow	yellow
THAP9	ANKRD18EP	0.002027	yellow	yellow
THAP9	ANKRD20A1	9.85e-07	yellow	yellow
THAP9	ANKRD26	0.008496	yellow	yellow
THAP9	ANKRD28	0.030442	yellow	yellow
THAP9	ANKRD50	0.005523	yellow	yellow
THAP9	ANO6	0.002124	yellow	yellow
THAP9	AOPEP	6.28e-06	yellow	yellow
THAP9	AP1G1	0.018809	yellow	yellow
THAP9	AP1S2	0.000209	yellow	yellow
THAP9	AP4E1	0.009592	yellow	yellow
THAP9	AP5M1	0.003635	yellow	yellow
THAP9	APAF1	0.00507	yellow	yellow
THAP9	APBB2	0.000329	yellow	yellow
THAP9	APC	0.004718	yellow	yellow
THAP9	APLF	0.004098	yellow	yellow
THAP9	APOOL	0.001491	yellow	yellow
THAP9	APPBP2	0.004394	yellow	yellow
THAP9	APPL1	0.01858	yellow	yellow
THAP9	ARAP2	0.002765	yellow	yellow
THAP9	ARFGEF2	0.005143	yellow	yellow
THAP9	ARFGEF3	0.000767	yellow	yellow
THAP9	ARHGAP12	0.010711	yellow	yellow
THAP9	ARHGAP26	0.000725	yellow	yellow
THAP9	ARHGAP31.AS1	2.53e-06	yellow	NA
THAP9	ARHGAP42	0.002226	yellow	yellow
THAP9	ARHGAP5	0.006351	yellow	yellow
THAP9	ARHGEF12	0.019841	yellow	yellow
THAP9	ARHGEF28	8.05e-05	yellow	yellow
THAP9	ARHGEF38	0.00274	yellow	yellow
THAP9	ARID2	0.015235	yellow	yellow
THAP9	ARID4A	0.008569	yellow	yellow
THAP9	ARID4B	0.012288	yellow	yellow
THAP9	ARID5B	0.001421	yellow	yellow
THAP9	ARIH1	0.010212	yellow	yellow
THAP9	ARL13B	0.003234	yellow	yellow
THAP9	ARL15	0.001245	yellow	yellow
THAP9	ARL5A	0.0173	yellow	yellow
THAP9	ARL5B	0.00572	yellow	yellow
THAP9	ARMC8	0.021568	yellow	yellow
THAP9	ARNTL	0.000691	yellow	yellow
THAP9	ARNTL2	2e-05	yellow	yellow
THAP9	ARPP19	0.004912	yellow	yellow
THAP9	ARRDC3	0.001	yellow	yellow
THAP9	ARRDC4	0.000327	yellow	yellow
THAP9	ASAH2	0.000131	yellow	yellow
THAP9	ASB3	0.005649	yellow	yellow
THAP9	ASCC3	0.015785	yellow	yellow
THAP9	ASH1L	0.011369	yellow	yellow
THAP9	ASPH	9.11e-05	yellow	yellow
THAP9	ASPM	0.004157	yellow	yellow
THAP9	ASS1P2	1.89e-06	yellow	yellow
THAP9	ASXL2	0.01816	yellow	yellow
THAP9	ASXL3	1.88e-08	yellow	yellow
THAP9	ATAD2B	0.021751	yellow	yellow
THAP9	ATAD5	0.003892	yellow	yellow
THAP9	ATF2	0.017508	yellow	yellow
THAP9	ATF7IP	0.007352	yellow	yellow
THAP9	ATF7IP2	0.00018	yellow	yellow
THAP9	ATG2B	0.006687	yellow	yellow
THAP9	ATL3	0.002099	yellow	yellow
THAP9	ATM	0.005151	yellow	yellow
THAP9	ATP10D	0.000564	yellow	yellow
THAP9	ATP11B	0.017108	yellow	yellow
THAP9	ATP11C	0.005368	yellow	yellow
THAP9	ATP13A3	0.022356	yellow	yellow
THAP9	ATP2B1	0.005579	yellow	yellow
THAP9	ATP6V1A	0.014621	yellow	yellow
THAP9	ATP7A	0.003944	yellow	yellow
THAP9	ATP8A1	6.45e-05	yellow	yellow
THAP9	ATP9B	0.000198	yellow	yellow
THAP9	ATR	0.016062	yellow	yellow
THAP9	ATRIP	1.6e-05	yellow	yellow
THAP9	ATRX	0.007734	yellow	yellow
THAP9	ATXN1	0.000529	yellow	yellow
THAP9	ATXN3	0.005607	yellow	yellow
THAP9	ATXN7	0.005293	yellow	yellow
THAP9	B3GALNT2	0.004517	yellow	yellow
THAP9	B3GLCT	0.001691	yellow	yellow
THAP9	B3GNT5	0.001584	yellow	yellow
THAP9	B4GALT6	8.88e-06	yellow	yellow
THAP9	BACH1	0.005439	yellow	yellow
THAP9	BAG2	3.18e-07	yellow	yellow
THAP9	BAG4	0.002101	yellow	yellow
THAP9	BARD1	0.011124	yellow	yellow
THAP9	BAZ2B	0.008445	yellow	yellow
THAP9	BBIP1	0.001566	yellow	yellow
THAP9	BBS10	0.003267	yellow	yellow
THAP9	BBS9	0.00215	yellow	yellow
THAP9	BBX	0.011252	yellow	yellow
THAP9	BCL11B	0.002177	yellow	yellow
THAP9	BCLAF1	0.042342	yellow	yellow
THAP9	BCLAF1P2	1.61e-06	yellow	yellow
THAP9	BCLAF3	0.003852	yellow	yellow
THAP9	BDP1	0.01821	yellow	yellow
THAP9	BICD1	0.000322	yellow	yellow
THAP9	BIRC2	0.004852	yellow	yellow
THAP9	BIRC6	0.02062	yellow	yellow
THAP9	BMP2K	0.008068	yellow	yellow
THAP9	BMPR1A	0.02042	yellow	yellow
THAP9	BMPR1AP1	8.52e-06	yellow	yellow
THAP9	BMPR2	0.001853	yellow	yellow
THAP9	BMS1P1	0.000612	yellow	yellow
THAP9	BMS1P15	1.44e-10	yellow	yellow
THAP9	BMT2	0.003496	yellow	yellow
THAP9	BNIP2	0.002107	yellow	yellow
THAP9	BOD1L1	0.011727	yellow	yellow
THAP9	BORCS5	0.001402	yellow	yellow
THAP9	BPNT2	0.002984	yellow	yellow
THAP9	BPTF	0.009709	yellow	yellow
THAP9	BRAF	0.015036	yellow	yellow
THAP9	BRCA2	0.002623	yellow	yellow
THAP9	BRCC3P1	7.81e-09	yellow	yellow
THAP9	BROX	0.004498	yellow	yellow
THAP9	BRWD1	0.009363	yellow	yellow
THAP9	BRWD3	0.004078	yellow	yellow
THAP9	BTAF1	0.011866	yellow	yellow
THAP9	BTBD3	0.000572	yellow	yellow
THAP9	BTBD8	0.002548	yellow	yellow
THAP9	C14orf28	0.002864	yellow	yellow
THAP9	C16orf72	0.016723	yellow	yellow
THAP9	C18orf25	0.001551	yellow	yellow
THAP9	C18orf54	0.001928	yellow	yellow
THAP9	C1RL.AS1	0.000508	yellow	NA
THAP9	C21orf91	0.003956	yellow	yellow
THAP9	C22orf24	3.43e-08	yellow	yellow
THAP9	C2orf16	9.07e-05	yellow	yellow
THAP9	C3orf52	8.61e-05	yellow	yellow
THAP9	C4orf47	8.63e-08	yellow	yellow
THAP9	C5orf51	0.002981	yellow	yellow
THAP9	C7orf25	0.000782	yellow	yellow
THAP9	C9orf72	0.002575	yellow	yellow
THAP9	CA15P1	7.88e-08	yellow	yellow
THAP9	CA5B	0.000255	yellow	yellow
THAP9	CACNB2	1.6e-06	yellow	yellow
THAP9	CACUL1	0.01609	yellow	yellow
THAP9	CAMK2D	0.002739	yellow	yellow
THAP9	CAMSAP2	0.003102	yellow	yellow
THAP9	CAND1	0.014354	yellow	yellow
THAP9	CAPN7	0.028126	yellow	yellow
THAP9	CAPS2	2.44e-05	yellow	yellow
THAP9	CARD8	0.001299	yellow	yellow
THAP9	CARD8.AS1	4.5e-05	yellow	NA
THAP9	CARF	0.003386	yellow	yellow
THAP9	CARNMT1	0.00784	yellow	yellow
THAP9	CASC2	0.000287	yellow	yellow
THAP9	CASD1	0.003596	yellow	yellow
THAP9	CASP8AP2	0.006421	yellow	yellow
THAP9	CASTOR2	2.12e-06	yellow	yellow
THAP9	CATSPERE	6.06e-05	yellow	yellow
THAP9	CBL	0.002647	yellow	yellow
THAP9	CBLB	0.001647	yellow	yellow
THAP9	CBR4	0.004297	yellow	yellow
THAP9	CBX5	0.003362	yellow	yellow
THAP9	CCDC110	9.2e-05	yellow	yellow
THAP9	CCDC117	0.002728	yellow	yellow
THAP9	CCDC126	0.002996	yellow	yellow
THAP9	CCDC13	5.3e-07	yellow	yellow
THAP9	CCDC15	0.008776	yellow	yellow
THAP9	CCDC158	7.15e-05	yellow	yellow
THAP9	CCDC171	0.00235	yellow	yellow
THAP9	CCDC175	4.43e-05	yellow	yellow
THAP9	CCDC18	0.008642	yellow	yellow
THAP9	CCDC186	0.005874	yellow	yellow
THAP9	CCDC30	0.00039	yellow	yellow
THAP9	CCDC50	0.004983	yellow	yellow
THAP9	CCDC62	0.000581	yellow	yellow
THAP9	CCDC66	0.009993	yellow	yellow
THAP9	CCDC71L	0.000551	yellow	yellow
THAP9	CCDC82	0.002315	yellow	yellow
THAP9	CCNG2	0.001177	yellow	yellow
THAP9	CCNT1	0.014604	yellow	yellow
THAP9	CCNT2	0.01826	yellow	yellow
THAP9	CCNYL1	0.003084	yellow	yellow
THAP9	CCP110	0.007481	yellow	yellow
THAP9	CCPG1	0.000511	yellow	yellow
THAP9	CCR6	3.86e-07	yellow	yellow
THAP9	CCSAP	0.002243	yellow	yellow
THAP9	CCSER1	0.001082	yellow	yellow
THAP9	CCSER2	0.002662	yellow	yellow
THAP9	CD2AP	0.009858	yellow	yellow
THAP9	CD302	0.000693	yellow	yellow
THAP9	CD47	0.001575	yellow	yellow
THAP9	CD81.AS1	1.31e-08	yellow	NA
THAP9	CDC14A	0.001481	yellow	yellow
THAP9	CDC27	0.020279	yellow	yellow
THAP9	CDC42BPA	0.001339	yellow	yellow
THAP9	CDC73	0.004944	yellow	yellow
THAP9	CDK17	0.007922	yellow	yellow
THAP9	CDK19	0.008281	yellow	yellow
THAP9	CDK6	0.001308	yellow	yellow
THAP9	CDKAL1	0.000172	yellow	yellow
THAP9	CDKL1	0.000806	yellow	yellow
THAP9	CDKL2	3.77e-08	yellow	yellow
THAP9	CDKL4	1.74e-05	yellow	yellow
THAP9	CDKL5	0.000585	yellow	yellow
THAP9	CDS2	0.000953	yellow	yellow
THAP9	CELF2	0.000317	yellow	yellow
THAP9	CENPC	0.036564	yellow	yellow
THAP9	CENPI	0.004287	yellow	yellow
THAP9	CEP112	0.000197	yellow	yellow
THAP9	CEP120	0.012341	yellow	yellow
THAP9	CEP128	0.003621	yellow	yellow
THAP9	CEP135	0.006215	yellow	yellow
THAP9	CEP162	0.005671	yellow	yellow
THAP9	CEP192	0.002468	yellow	yellow
THAP9	CEP290	0.010427	yellow	yellow
THAP9	CEP295	0.016581	yellow	yellow
THAP9	CEP350	0.019212	yellow	yellow
THAP9	CEP44	0.026879	yellow	yellow
THAP9	CEP57L1	0.006456	yellow	yellow
THAP9	CEP97	0.012488	yellow	yellow
THAP9	CEPT1	0.013378	yellow	yellow
THAP9	CERS6	0.006672	yellow	yellow
THAP9	CERT1	0.008664	yellow	yellow
THAP9	CFAP43	1.39e-06	yellow	yellow
THAP9	CFAP69	0.000475	yellow	yellow
THAP9	CFAP97	0.019085	yellow	yellow
THAP9	CFHR3	9.26e-11	yellow	yellow
THAP9	CFLAR	0.003403	yellow	yellow
THAP9	CGGBP1	0.020364	yellow	yellow
THAP9	CHD1	0.016447	yellow	yellow
THAP9	CHD2	0.003375	yellow	yellow
THAP9	CHD6	0.00587	yellow	yellow
THAP9	CHD9	0.010448	yellow	yellow
THAP9	CHIC1	0.001738	yellow	yellow
THAP9	CHM	0.005496	yellow	yellow
THAP9	CHML	0.008642	yellow	yellow
THAP9	CHORDC1	0.003038	yellow	yellow
THAP9	CHROMR	9.14e-05	yellow	yellow
THAP9	CILK1	0.002515	yellow	yellow
THAP9	CLASP2	0.039426	yellow	yellow
THAP9	CLHC1	0.000762	yellow	yellow
THAP9	CLIC5	2.13e-06	yellow	yellow
THAP9	CLIP1	0.007366	yellow	yellow
THAP9	CLOCK	0.004234	yellow	yellow
THAP9	CLUL1	4.56e-10	yellow	yellow
THAP9	CMTR2	0.010385	yellow	yellow
THAP9	CNKSR3	0.000651	yellow	yellow
THAP9	CNOT2	0.018895	yellow	yellow
THAP9	CNOT6	0.017063	yellow	yellow
THAP9	CNOT6L	0.020619	yellow	yellow
THAP9	CNST	0.009248	yellow	yellow
THAP9	CNTF	0.000992	yellow	yellow
THAP9	CNTLN	0.000137	yellow	yellow
THAP9	COL4A3	6.27e-08	yellow	yellow
THAP9	COL4A6	4.82e-10	yellow	yellow
THAP9	COMMD3.BMI1	2.97e-10	yellow	NA
THAP9	COX10.AS1	0.003152	yellow	NA
THAP9	CPD	0.003644	yellow	yellow
THAP9	CPEB2	0.002251	yellow	yellow
THAP9	CPEB3	0.001948	yellow	yellow
THAP9	CPEB4	0.000787	yellow	yellow
THAP9	CPLANE1	0.001207	yellow	yellow
THAP9	CPSF6	0.018133	yellow	yellow
THAP9	CREB1	0.034237	yellow	yellow
THAP9	CREB5	6.9e-06	yellow	yellow
THAP9	CREBL2	0.002774	yellow	yellow
THAP9	CREBRF	0.002164	yellow	yellow
THAP9	CRLF3	0.001631	yellow	yellow
THAP9	CRPPA	0.000143	yellow	yellow
THAP9	CRTC3.AS1	0.000401	yellow	NA
THAP9	CRYBG3	0.003277	yellow	yellow
THAP9	CSNK1A1	0.005765	yellow	yellow
THAP9	CSNK1G1	0.003497	yellow	yellow
THAP9	CSRNP3	8.22e-07	yellow	yellow
THAP9	CT45A11P	9.92e-07	yellow	yellow
THAP9	CT62	3.23e-07	yellow	yellow
THAP9	CTBS	0.002576	yellow	yellow
THAP9	CTDSPL2	0.006825	yellow	yellow
THAP9	CUL5	0.05005	yellow	yellow
THAP9	CXADR	0.003297	yellow	yellow
THAP9	CXorf58	2.85e-06	yellow	yellow
THAP9	CXXC4	2.72e-06	yellow	yellow
THAP9	CYLD	0.002007	yellow	yellow
THAP9	CYP20A1	0.011582	yellow	yellow
THAP9	CYP2U1	0.001079	yellow	yellow
THAP9	CYP3A7	3.97e-08	yellow	yellow
THAP9	CYP4V2	0.001184	yellow	yellow
THAP9	CYP51A1.AS1	3.83e-05	yellow	NA
THAP9	DAAM1	0.003625	yellow	yellow
THAP9	DBIL5P	5.18e-06	yellow	yellow
THAP9	DCAF10	0.012436	yellow	yellow
THAP9	DCAF16	0.006347	yellow	yellow
THAP9	DCAF17	0.02132	yellow	yellow
THAP9	DCLRE1C	0.00439	yellow	yellow
THAP9	DCP2	0.006296	yellow	yellow
THAP9	DCUN1D1	0.030356	yellow	yellow
THAP9	DCUN1D3	0.000112	yellow	yellow
THAP9	DCUN1D4	0.007927	yellow	yellow
THAP9	DDHD1	0.003471	yellow	yellow
THAP9	DDHD2	0.001585	yellow	yellow
THAP9	DDX17	0.007844	yellow	yellow
THAP9	DDX47	0.000872	yellow	yellow
THAP9	DDX6	0.046283	yellow	yellow
THAP9	DDX60L	0.000175	yellow	yellow
THAP9	DENND11	0.005038	yellow	yellow
THAP9	DENND1B	0.006723	yellow	yellow
THAP9	DENND2C	1.12e-05	yellow	yellow
THAP9	DENND4A	0.013065	yellow	yellow
THAP9	DENND4C	0.013775	yellow	yellow
THAP9	DENND5B	0.000172	yellow	yellow
THAP9	DENND5B.AS1	1.35e-07	yellow	NA
THAP9	DENND6A	0.023477	yellow	yellow
THAP9	DGCR11	6.01e-05	yellow	yellow
THAP9	DGKE	0.003779	yellow	yellow
THAP9	DHX36	0.032984	yellow	yellow
THAP9	DIAPH2	0.004953	yellow	yellow
THAP9	DICER1	0.008362	yellow	yellow
THAP9	DIP2B	0.004994	yellow	yellow
THAP9	DIPK2A	0.008649	yellow	yellow
THAP9	DISC1	0.000275	yellow	yellow
THAP9	DLG1	0.01599	yellow	yellow
THAP9	DMXL1	0.013413	yellow	yellow
THAP9	DMXL2	0.002497	yellow	yellow
THAP9	DNAH6	0.000902	yellow	yellow
THAP9	DNAI4	9.43e-05	yellow	yellow
THAP9	DNAJB14	0.014474	yellow	yellow
THAP9	DNAJC13	0.027041	yellow	yellow
THAP9	DNAJC24	0.01104	yellow	yellow
THAP9	DNAJC27	0.009393	yellow	yellow
THAP9	DNAJC28	3.69e-05	yellow	yellow
THAP9	DNAJC3	0.003224	yellow	yellow
THAP9	DNAL1	0.002725	yellow	yellow
THAP9	DNASE2B	1.32e-08	yellow	yellow
THAP9	DNM3	3.24e-06	yellow	yellow
THAP9	DOCK11	0.000309	yellow	yellow
THAP9	DOCK7	0.014176	yellow	yellow
THAP9	DOCK9	0.001326	yellow	yellow
THAP9	DOP1A	0.010841	yellow	yellow
THAP9	DPP8	0.012045	yellow	yellow
THAP9	DPY19L3	0.001546	yellow	yellow
THAP9	DR1	0.014229	yellow	yellow
THAP9	DSC2	0.000126	yellow	yellow
THAP9	DSG4	1.22e-06	yellow	yellow
THAP9	DST	0.001121	yellow	yellow
THAP9	DTWD1	0.003785	yellow	yellow
THAP9	DTWD2	0.003056	yellow	yellow
THAP9	DUSP19	0.00265	yellow	yellow
THAP9	DUTP6	0.000111	yellow	yellow
THAP9	DUXAP9	1.32e-08	yellow	yellow
THAP9	DYNC1H1	0.003348	yellow	yellow
THAP9	DYNC2H1	0.000165	yellow	yellow
THAP9	DYRK1A	0.01691	yellow	yellow
THAP9	DYRK2	0.006833	yellow	yellow
THAP9	DZIP3	0.002546	yellow	yellow
THAP9	EBLN2	0.00081	yellow	yellow
THAP9	EBLN3P	0.005102	yellow	yellow
THAP9	EDEM1	0.002106	yellow	yellow
THAP9	EDEM3	0.001041	yellow	yellow
THAP9	EDRF1	0.010847	yellow	yellow
THAP9	EEA1	0.008342	yellow	yellow
THAP9	EEF1A1P4	4.16e-06	yellow	yellow
THAP9	EFCAB10	0.000126	yellow	yellow
THAP9	EFCAB6	8.76e-05	yellow	yellow
THAP9	EFCAB7	0.009413	yellow	yellow
THAP9	EHF	0.001131	yellow	yellow
THAP9	EID3	0.000377	yellow	yellow
THAP9	EIF1B.AS1	0.000263	yellow	NA
THAP9	EIF2AK2	0.007684	yellow	yellow
THAP9	EIF2AK3	0.008334	yellow	yellow
THAP9	EIF4BP3	0.001759	yellow	yellow
THAP9	EIF4E3	3.41e-05	yellow	yellow
THAP9	EIF5A2	0.001141	yellow	yellow
THAP9	ELAPOR2	1.26e-07	yellow	yellow
THAP9	ELF2	0.03422	yellow	yellow
THAP9	ELK4	0.001065	yellow	yellow
THAP9	ELMOD2	0.022918	yellow	yellow
THAP9	EMB	1.55e-07	yellow	yellow
THAP9	EMSY	0.005766	yellow	yellow
THAP9	ENAH	0.002154	yellow	yellow
THAP9	ENO1.AS1	4.89e-07	yellow	NA
THAP9	ENPP1	0.000194	yellow	yellow
THAP9	ENTPD7	0.000906	yellow	yellow
THAP9	EOGT	0.00227	yellow	yellow
THAP9	EPB41L5	0.006295	yellow	yellow
THAP9	EPC1	0.015843	yellow	yellow
THAP9	EPC2	0.024056	yellow	yellow
THAP9	EPG5	0.002351	yellow	yellow
THAP9	EPM2A	0.002031	yellow	yellow
THAP9	EPM2AIP1	0.001792	yellow	yellow
THAP9	EPS15	0.026489	yellow	yellow
THAP9	ERBIN	0.014754	yellow	yellow
THAP9	ERCC4	0.011218	yellow	yellow
THAP9	ERCC6	0.015278	yellow	yellow
THAP9	ERCC6L2	0.016674	yellow	yellow
THAP9	ERO1A	6.96e-05	yellow	yellow
THAP9	ERO1B	9.81e-06	yellow	yellow
THAP9	ESCO1	0.004787	yellow	yellow
THAP9	ESRRG	9.42e-09	yellow	yellow
THAP9	ETAA1	0.016109	yellow	yellow
THAP9	ETFBKMT	0.001333	yellow	yellow
THAP9	ETNK1	0.003103	yellow	yellow
THAP9	EVI5	0.016009	yellow	yellow
THAP9	EXOC5	0.015713	yellow	yellow
THAP9	EXOC6B	0.007045	yellow	yellow
THAP9	EXOC8	0.016751	yellow	yellow
THAP9	EXOG	0.005244	yellow	yellow
THAP9	EXPH5	0.001826	yellow	yellow
THAP9	FABP5P3	3.11e-10	yellow	yellow
THAP9	FAM102B	0.003909	yellow	yellow
THAP9	FAM111A	0.00227	yellow	yellow
THAP9	FAM122A	0.002766	yellow	yellow
THAP9	FAM126B	0.003698	yellow	yellow
THAP9	FAM135A	0.006007	yellow	yellow
THAP9	FAM13A	1.97e-05	yellow	yellow
THAP9	FAM13B	0.005538	yellow	yellow
THAP9	FAM151B	0.000195	yellow	yellow
THAP9	FAM160A1	0.004028	yellow	yellow
THAP9	FAM160B1	0.010272	yellow	yellow
THAP9	FAM172A	0.004634	yellow	yellow
THAP9	FAM199X	0.005566	yellow	yellow
THAP9	FAM214A	0.001291	yellow	yellow
THAP9	FAM227B	0.000791	yellow	yellow
THAP9	FAM241A	3.82e-05	yellow	yellow
THAP9	FAM76B	0.013446	yellow	yellow
THAP9	FAM83B	0.000689	yellow	yellow
THAP9	FANCB	0.004142	yellow	yellow
THAP9	FANCM	0.004543	yellow	yellow
THAP9	FAR1	0.01451	yellow	yellow
THAP9	FAT1	0.001454	yellow	yellow
THAP9	FBXL20	7.65e-06	yellow	yellow
THAP9	FBXL4	0.023524	yellow	yellow
THAP9	FBXL5	0.001674	yellow	yellow
THAP9	FBXO11	0.029797	yellow	yellow
THAP9	FBXO28	0.00936	yellow	yellow
THAP9	FBXO3	0.012777	yellow	yellow
THAP9	FBXO30	0.023055	yellow	yellow
THAP9	FBXO38	0.015485	yellow	yellow
THAP9	FBXW11	0.013324	yellow	yellow
THAP9	FBXW7	0.013477	yellow	yellow
THAP9	FCHO2	0.005186	yellow	yellow
THAP9	FEM1B	0.016834	yellow	yellow
THAP9	FEM1C	0.00263	yellow	yellow
THAP9	FER	0.000178	yellow	yellow
THAP9	FEZ2	0.004375	yellow	yellow
THAP9	FGD4	0.002899	yellow	yellow
THAP9	FGD6	0.00154	yellow	yellow
THAP9	FGFR1OP2	0.008514	yellow	yellow
THAP9	FKBP14	0.001344	yellow	yellow
THAP9	FKTN	0.008714	yellow	yellow
THAP9	FMN1	0.001066	yellow	yellow
THAP9	FMNL2	0.004921	yellow	yellow
THAP9	FMR1	0.002447	yellow	yellow
THAP9	FNDC3A	0.003519	yellow	yellow
THAP9	FNDC3B	0.002277	yellow	yellow
THAP9	FNIP1	0.013435	yellow	yellow
THAP9	FNIP2	0.004184	yellow	yellow
THAP9	FOXN2	0.022791	yellow	yellow
THAP9	FOXP1	0.000567	yellow	yellow
THAP9	FRG1.DT	5.98e-05	yellow	NA
THAP9	FRK	0.002742	yellow	yellow
THAP9	FRMD6.AS1	8.92e-06	yellow	NA
THAP9	FRRS1	1.3e-05	yellow	yellow
THAP9	FRS2	0.018548	yellow	yellow
THAP9	FRYL	0.002856	yellow	yellow
THAP9	FSD1L	0.000754	yellow	yellow
THAP9	FYTTD1	0.008872	yellow	yellow
THAP9	G2E3	0.008693	yellow	yellow
THAP9	G3BP1	0.024218	yellow	yellow
THAP9	GAB1	0.006234	yellow	yellow
THAP9	GABPA	0.023748	yellow	yellow
THAP9	GABPB1	0.012845	yellow	yellow
THAP9	GALNT4	9.93e-06	yellow	yellow
THAP9	GALNT7	0.000354	yellow	yellow
THAP9	GAN	0.001488	yellow	yellow
THAP9	GAPVD1	0.026377	yellow	yellow
THAP9	GAS2L3	0.000796	yellow	yellow
THAP9	GCATP1	2.48e-07	yellow	yellow
THAP9	GCC2	0.002571	yellow	yellow
THAP9	GDAP2	0.005563	yellow	yellow
THAP9	GEN1	0.00743	yellow	yellow
THAP9	GFOD1	0.000507	yellow	yellow
THAP9	GIT2	0.003868	yellow	yellow
THAP9	GK	3.1e-05	yellow	yellow
THAP9	GK5	0.00522	yellow	yellow
THAP9	GLCCI1	0.000312	yellow	yellow
THAP9	GLS	0.00472	yellow	yellow
THAP9	GMFB	0.006229	yellow	yellow
THAP9	GNA13	0.011187	yellow	yellow
THAP9	GNAQ	0.002868	yellow	yellow
THAP9	GNG12	0.003527	yellow	yellow
THAP9	GNL3L	0.001443	yellow	yellow
THAP9	GNPDA2	0.004645	yellow	yellow
THAP9	GNPTAB	0.002293	yellow	yellow
THAP9	GOLGA4	0.018422	yellow	yellow
THAP9	GOLGA8H	1.05e-05	yellow	yellow
THAP9	GOLGA8N	8.32e-05	yellow	yellow
THAP9	GOLGB1	0.009252	yellow	yellow
THAP9	GOPC	0.012367	yellow	yellow
THAP9	GPAM	0.000884	yellow	yellow
THAP9	GPATCH2	0.016904	yellow	yellow
THAP9	GPATCH2L	0.006267	yellow	yellow
THAP9	GPCPD1	3.3e-05	yellow	yellow
THAP9	GPLD1	7.82e-05	yellow	yellow
THAP9	GPR137C	0.000116	yellow	yellow
THAP9	GPR155	5.7e-09	yellow	yellow
THAP9	GPR180	0.002914	yellow	yellow
THAP9	GPR63	0.000215	yellow	yellow
THAP9	GPRIN3	0.000993	yellow	yellow
THAP9	GRIP1	7.21e-06	yellow	yellow
THAP9	GRK3	2.02e-05	yellow	yellow
THAP9	GRK4	0.000578	yellow	yellow
THAP9	GRM7	2.33e-06	yellow	yellow
THAP9	GRPEL2.AS1	2.23e-05	yellow	NA
THAP9	GSAP	0.001354	yellow	yellow
THAP9	GTDC1	0.0085	yellow	yellow
THAP9	GTF2A1	0.01532	yellow	yellow
THAP9	GTF2IP5	0.000433	yellow	yellow
THAP9	GTF2IP9	0.000415	yellow	yellow
THAP9	GTF2IRD1P1	1.67e-06	yellow	yellow
THAP9	GUSBP2	0.000377	yellow	yellow
THAP9	GXYLT1	0.010632	yellow	yellow
THAP9	H2BS1	4.95e-10	yellow	yellow
THAP9	HACE1	0.010764	yellow	yellow
THAP9	HAS2	4.89e-06	yellow	yellow
THAP9	HCFC2	0.001442	yellow	yellow
THAP9	HCG18	0.0026	yellow	yellow
THAP9	HDX	0.000301	yellow	yellow
THAP9	HEATR5A	0.003735	yellow	yellow
THAP9	HECA	0.003377	yellow	yellow
THAP9	HECTD1	0.010471	yellow	yellow
THAP9	HECTD2	0.000304	yellow	yellow
THAP9	HECTD4	0.004543	yellow	yellow
THAP9	HELB	0.001669	yellow	yellow
THAP9	HELLS	0.003213	yellow	yellow
THAP9	HELZ	0.008963	yellow	yellow
THAP9	HERC1	0.007898	yellow	yellow
THAP9	HERC3	0.003036	yellow	yellow
THAP9	HERC4	0.016055	yellow	yellow
THAP9	HIPK1	0.007151	yellow	yellow
THAP9	HIPK2	0.000699	yellow	yellow
THAP9	HIPK3	0.018501	yellow	yellow
THAP9	HIVEP1	0.008137	yellow	yellow
THAP9	HIVEP2	0.001497	yellow	yellow
THAP9	HLA.F.AS1	3.05e-07	yellow	NA
THAP9	HLTF	0.000621	yellow	yellow
THAP9	HMBOX1	0.000478	yellow	yellow
THAP9	HMGB1P31	0.000119	yellow	yellow
THAP9	HOMER1	0.003419	yellow	yellow
THAP9	HOOK1	0.00675	yellow	yellow
THAP9	HOOK3	0.000649	yellow	yellow
THAP9	HOXD8	4.76e-08	yellow	yellow
THAP9	HPS5	0.004825	yellow	yellow
THAP9	HSPA13	0.003359	yellow	yellow
THAP9	HTR1F	1.79e-06	yellow	yellow
THAP9	HTR4	1.41e-09	yellow	yellow
THAP9	IBTK	0.008909	yellow	yellow
THAP9	ICE1	0.017743	yellow	yellow
THAP9	ICE2	0.01058	yellow	yellow
THAP9	IDE	0.012254	yellow	yellow
THAP9	IFNA20P	3.12e-05	yellow	yellow
THAP9	IFT80	0.007482	yellow	yellow
THAP9	IGIP	0.001102	yellow	yellow
THAP9	IKZF2	0.000335	yellow	yellow
THAP9	IL23R	0.000412	yellow	yellow
THAP9	IL7	5.09e-07	yellow	yellow
THAP9	ILDR2	2.99e-06	yellow	yellow
THAP9	INPP4A	0.001882	yellow	yellow
THAP9	INPP4B	0.000862	yellow	yellow
THAP9	INPP5B	0.003084	yellow	yellow
THAP9	INPP5F	0.002264	yellow	yellow
THAP9	INSL3	6.67e-06	yellow	yellow
THAP9	INTS2	0.009684	yellow	yellow
THAP9	INTS6	0.001967	yellow	yellow
THAP9	INTS6L	0.001395	yellow	yellow
THAP9	INTS6P1	2.4e-05	yellow	yellow
THAP9	INTU	0.001001	yellow	yellow
THAP9	INVS	0.012406	yellow	yellow
THAP9	IPMK	0.003646	yellow	yellow
THAP9	IPO8P1	2.74e-07	yellow	yellow
THAP9	IQCH	0.000656	yellow	yellow
THAP9	IQCH.AS1	0.00398	yellow	NA
THAP9	IQGAP2	2.25e-05	yellow	yellow
THAP9	IRAK1BP1	0.001769	yellow	yellow
THAP9	IREB2	0.011225	yellow	yellow
THAP9	IRGQ	0.003749	yellow	yellow
THAP9	ITCH	0.010935	yellow	yellow
THAP9	ITGA2	0.002739	yellow	yellow
THAP9	ITGB1BP2	7.83e-06	yellow	yellow
THAP9	ITGB8	5.87e-05	yellow	yellow
THAP9	ITPRIPL2	0.001824	yellow	yellow
THAP9	ITSN2	0.015033	yellow	yellow
THAP9	IVNS1ABP	0.000461	yellow	yellow
THAP9	JAKMIP3	1.31e-06	yellow	yellow
THAP9	JMJD1C	0.019591	yellow	yellow
THAP9	JMJD1C.AS1	1.45e-06	yellow	NA
THAP9	JMY	0.006751	yellow	yellow
THAP9	KANSL1	0.004153	yellow	yellow
THAP9	KANSL1L	0.001209	yellow	yellow
THAP9	KAT2B	0.000303	yellow	yellow
THAP9	KAT6A	0.001883	yellow	yellow
THAP9	KATNBL1	0.004447	yellow	yellow
THAP9	KBTBD8	0.002065	yellow	yellow
THAP9	KCNA2	2.95e-09	yellow	yellow
THAP9	KCNJ2	1.01e-06	yellow	yellow
THAP9	KDM5A	0.005891	yellow	yellow
THAP9	KDM6A	0.004653	yellow	yellow
THAP9	KDM7A	0.004418	yellow	yellow
THAP9	KIAA0232	0.004839	yellow	yellow
THAP9	KIAA0586	0.006077	yellow	yellow
THAP9	KIAA0825	0.000308	yellow	yellow
THAP9	KIAA0895	1.64e-05	yellow	yellow
THAP9	KIAA1109	0.013992	yellow	yellow
THAP9	KIAA1328	0.001342	yellow	yellow
THAP9	KIAA1586	0.003678	yellow	yellow
THAP9	KIAA1671.AS1	2.2e-05	yellow	NA
THAP9	KIAA1958	0.004489	yellow	yellow
THAP9	KIAA2026	0.011473	yellow	yellow
THAP9	KIDINS220	0.012891	yellow	yellow
THAP9	KIF1B	0.006468	yellow	yellow
THAP9	KIF21A	0.004247	yellow	yellow
THAP9	KIF27	0.010566	yellow	yellow
THAP9	KIF2A	0.0052	yellow	yellow
THAP9	KIF3A	0.005611	yellow	yellow
THAP9	KITLG	8.7e-05	yellow	yellow
THAP9	KLHL15	0.006987	yellow	yellow
THAP9	KLHL24	0.004792	yellow	yellow
THAP9	KLHL28	0.009356	yellow	yellow
THAP9	KLHL41	3.75e-05	yellow	yellow
THAP9	KLHL42	0.002355	yellow	yellow
THAP9	KMT2A	0.006369	yellow	yellow
THAP9	KMT2C	0.007355	yellow	yellow
THAP9	KMT5AP2	2.48e-08	yellow	yellow
THAP9	KPNA4P1	6.96e-05	yellow	yellow
THAP9	KPNA5	0.002879	yellow	yellow
THAP9	KRAS	0.004253	yellow	yellow
THAP9	KRBA2	4.69e-05	yellow	yellow
THAP9	KRIT1	0.012708	yellow	yellow
THAP9	L3MBTL3	0.000806	yellow	yellow
THAP9	L3MBTL4	2.17e-07	yellow	yellow
THAP9	LANCL1	0.005888	yellow	yellow
THAP9	LANCL3	1.53e-06	yellow	yellow
THAP9	LARP1B	0.013862	yellow	yellow
THAP9	LARP4	0.015434	yellow	yellow
THAP9	LATS1	0.025163	yellow	yellow
THAP9	LCA5L	0.000324	yellow	yellow
THAP9	LCLAT1	0.005413	yellow	yellow
THAP9	LCOR	0.004484	yellow	yellow
THAP9	LCORL	0.00704	yellow	yellow
THAP9	LEMD3	0.015196	yellow	yellow
THAP9	LGR4	0.000476	yellow	yellow
THAP9	LHFPL2	0.00077	yellow	yellow
THAP9	LIMS1	0.005328	yellow	yellow
THAP9	LIN54	0.022309	yellow	yellow
THAP9	LIN7C	0.002919	yellow	yellow
THAP9	LINC00299	1.31e-05	yellow	yellow
THAP9	LINC00426	5.05e-08	yellow	yellow
THAP9	LINC00449	1.76e-05	yellow	yellow
THAP9	LINC00571	0.000482	yellow	yellow
THAP9	LINC00649	7.87e-08	yellow	yellow
THAP9	LINC00654	2.92e-06	yellow	yellow
THAP9	LINC00880	2.75e-06	yellow	yellow
THAP9	LINC01136	2.78e-07	yellow	yellow
THAP9	LINC01271	8.79e-08	yellow	yellow
THAP9	LINC01285	1.14e-05	yellow	yellow
THAP9	LINC01433	1.22e-07	yellow	yellow
THAP9	LINC01465	0.000206	yellow	yellow
THAP9	LINC01534	0.000161	yellow	yellow
THAP9	LINC01559	2.62e-10	yellow	yellow
THAP9	LINC01715	5.9e-07	yellow	yellow
THAP9	LINC01915	5.69e-09	yellow	yellow
THAP9	LINC01963	3.16e-06	yellow	yellow
THAP9	LINC02035	0.00042	yellow	yellow
THAP9	LINC02561	2.02e-07	yellow	yellow
THAP9	LINC02609	4.21e-07	yellow	yellow
THAP9	LINC02701	7.44e-08	yellow	yellow
THAP9	LINS1	0.00234	yellow	yellow
THAP9	LIPG	1.71e-06	yellow	yellow
THAP9	LIX1L.AS1	4.2e-06	yellow	NA
THAP9	LMAN1	0.000604	yellow	yellow
THAP9	LMBR1	0.009834	yellow	yellow
THAP9	LMBRD2	0.005168	yellow	yellow
THAP9	LMLN	0.000744	yellow	yellow
THAP9	LNPEP	0.005887	yellow	yellow
THAP9	LNPK	0.020113	yellow	yellow
THAP9	LOC100130691	0.000808	yellow	yellow
THAP9	LOC100133315	0.001666	yellow	yellow
THAP9	LOC100287049	0.000191	yellow	yellow
THAP9	LOC100289350	4.39e-10	yellow	yellow
THAP9	LOC100289518	0.000314	yellow	yellow
THAP9	LOC100419436	4.64e-05	yellow	yellow
THAP9	LOC100505549	0.001171	yellow	yellow
THAP9	LOC100507053	0.000152	yellow	yellow
THAP9	LOC101926933	0.00013	yellow	yellow
THAP9	LOC101927026	2.39e-06	yellow	yellow
THAP9	LOC101927060	0.002056	yellow	yellow
THAP9	LOC101927476	6.91e-09	yellow	yellow
THAP9	LOC101927989	5.39e-06	yellow	yellow
THAP9	LOC101928414	1.95e-07	yellow	yellow
THAP9	LOC101929524	3.3e-06	yellow	yellow
THAP9	LOC102723335	3.66e-06	yellow	yellow
THAP9	LOC102723360	4.13e-09	yellow	yellow
THAP9	LOC105369911	1.07e-05	yellow	yellow
THAP9	LOC105374114	3.13e-09	yellow	yellow
THAP9	LOC152048	0.000628	yellow	yellow
THAP9	LOC283922	0.001525	yellow	yellow
THAP9	LOC442155	3.82e-05	yellow	yellow
THAP9	LOC729654	2.8e-06	yellow	yellow
THAP9	LONRF3	0.000115	yellow	yellow
THAP9	LPAR6	4.01e-06	yellow	yellow
THAP9	LPGAT1	0.000892	yellow	yellow
THAP9	LRBA	0.016442	yellow	yellow
THAP9	LRCH3	0.005713	yellow	yellow
THAP9	LRGUK	1.01e-06	yellow	yellow
THAP9	LRIG2	0.015341	yellow	yellow
THAP9	LRP12	0.000199	yellow	yellow
THAP9	LRP4	7.23e-10	yellow	yellow
THAP9	LRP6	0.013004	yellow	yellow
THAP9	LRRC19	3.63e-06	yellow	yellow
THAP9	LRRC31	8.85e-06	yellow	yellow
THAP9	LRRC34	4.54e-07	yellow	yellow
THAP9	LRRC37A	1.1e-05	yellow	yellow
THAP9	LRRC37A15P	0.000258	yellow	yellow
THAP9	LRRC37A2	0.001543	yellow	yellow
THAP9	LRRC37A6P	1.99e-07	yellow	yellow
THAP9	LRRC58	0.025586	yellow	yellow
THAP9	LRRC8B	0.015435	yellow	yellow
THAP9	LRRC9	2.72e-05	yellow	yellow
THAP9	LRRIQ3	1.53e-05	yellow	yellow
THAP9	LSM11	0.003645	yellow	yellow
THAP9	LTN1	0.012915	yellow	yellow
THAP9	LY75.CD302	7.97e-06	yellow	NA
THAP9	LYSMD3	0.014279	yellow	yellow
THAP9	LYST	0.000285	yellow	yellow
THAP9	MACC1	0.003638	yellow	yellow
THAP9	MACF1	0.002364	yellow	yellow
THAP9	MACROD2	8.12e-06	yellow	yellow
THAP9	MAGEB5	6.49e-09	yellow	yellow
THAP9	MAGI3	0.006153	yellow	yellow
THAP9	MALT1	0.001936	yellow	yellow
THAP9	MAN1A1	0.000337	yellow	yellow
THAP9	MAN1A2	0.027945	yellow	yellow
THAP9	MAN2A1	0.007592	yellow	yellow
THAP9	MANEA	0.004537	yellow	yellow
THAP9	MAP10	6.71e-09	yellow	yellow
THAP9	MAP2K4	0.002511	yellow	yellow
THAP9	MAP2K4P1	0.000324	yellow	yellow
THAP9	MAP2K6	9.66e-06	yellow	yellow
THAP9	MAP3K1	0.00314	yellow	yellow
THAP9	MAP3K2	0.019891	yellow	yellow
THAP9	MAP3K7	0.027154	yellow	yellow
THAP9	MAP4K3	0.007985	yellow	yellow
THAP9	MAP4K5	0.009756	yellow	yellow
THAP9	MAPK8	0.01407	yellow	yellow
THAP9	MARCHF1	0.000344	yellow	yellow
THAP9	MARCHF6	0.012227	yellow	yellow
THAP9	MARCHF7	0.026293	yellow	yellow
THAP9	MAST4	0.000742	yellow	yellow
THAP9	MBD5	0.004059	yellow	yellow
THAP9	MBNL1	0.018323	yellow	yellow
THAP9	MBNL2	0.001437	yellow	yellow
THAP9	MBNL3	0.002902	yellow	yellow
THAP9	MBOAT4	6.99e-07	yellow	yellow
THAP9	MBTD1	0.008258	yellow	yellow
THAP9	MCF2	1.45e-05	yellow	yellow
THAP9	MCM9	0.021084	yellow	yellow
THAP9	MCOLN3	7.39e-10	yellow	yellow
THAP9	MCTP2	0.001569	yellow	yellow
THAP9	MDM2	0.000449	yellow	yellow
THAP9	MDN1	0.00884	yellow	yellow
THAP9	MED13	0.02091	yellow	yellow
THAP9	MED13L	0.012538	yellow	yellow
THAP9	MED23	0.015395	yellow	yellow
THAP9	MEF2A	0.00305	yellow	yellow
THAP9	MEGF9	0.001712	yellow	yellow
THAP9	MET	0.002601	yellow	yellow
THAP9	METTL25	0.001407	yellow	yellow
THAP9	METTL4	0.001702	yellow	yellow
THAP9	METTL8	0.014314	yellow	yellow
THAP9	MEX3C	0.002731	yellow	yellow
THAP9	MFAP3	0.005113	yellow	yellow
THAP9	MFAP3L	2.55e-05	yellow	yellow
THAP9	MFF.DT	0.000778	yellow	NA
THAP9	MFSD1	0.001512	yellow	yellow
THAP9	MFSD4B	0.002226	yellow	yellow
THAP9	MFSD8	0.031471	yellow	yellow
THAP9	MGA	0.017316	yellow	yellow
THAP9	MGAT4A	0.003335	yellow	yellow
THAP9	MIB1	0.001842	yellow	yellow
THAP9	MICAL3	0.002085	yellow	yellow
THAP9	MICC	9.25e-09	yellow	yellow
THAP9	MIER1	0.004215	yellow	yellow
THAP9	MIER3	0.002214	yellow	yellow
THAP9	MIGA1	0.01612	yellow	yellow
THAP9	MINAR1	9.34e-05	yellow	yellow
THAP9	MIP	8.67e-07	yellow	yellow
THAP9	MIPOL1	8.68e-05	yellow	yellow
THAP9	MIR10B	1.01e-08	yellow	yellow
THAP9	MIR3153	9.74e-06	yellow	yellow
THAP9	MIR4263	5.13e-05	yellow	yellow
THAP9	MIR548AR	1.21e-08	yellow	yellow
THAP9	MIR596	1.98e-10	yellow	yellow
THAP9	MIR659	5.51e-08	yellow	yellow
THAP9	MIR6719	1.41e-08	yellow	yellow
THAP9	MIS18BP1	0.010072	yellow	yellow
THAP9	MKLN1	0.012108	yellow	yellow
THAP9	MLH3	0.006811	yellow	yellow
THAP9	MMS22L	0.006023	yellow	yellow
THAP9	MOB1A	0.030282	yellow	yellow
THAP9	MOB1B	0.003282	yellow	yellow
THAP9	MON2	0.013762	yellow	yellow
THAP9	MORC3	0.017508	yellow	yellow
THAP9	MOSMO	0.0039	yellow	yellow
THAP9	MPHOSPH9	0.006087	yellow	yellow
THAP9	MPP5	0.013345	yellow	yellow
THAP9	MPP6	0.001312	yellow	yellow
THAP9	MRPS9.AS2	4.3e-09	yellow	NA
THAP9	MRTFB	0.006527	yellow	yellow
THAP9	MSI2	0.002269	yellow	yellow
THAP9	MSL2	0.013917	yellow	yellow
THAP9	MTERF1	4.91e-05	yellow	yellow
THAP9	MTF2	0.023478	yellow	yellow
THAP9	MTHFD2L	0.002697	yellow	yellow
THAP9	MTMR10	0.001303	yellow	yellow
THAP9	MTMR8	0.000993	yellow	yellow
THAP9	MTMR9	0.001036	yellow	yellow
THAP9	MTR	0.015782	yellow	yellow
THAP9	MTX3	0.001083	yellow	yellow
THAP9	MYBL1	7.66e-05	yellow	yellow
THAP9	MYCBP2	0.004436	yellow	yellow
THAP9	MYH15	2.05e-06	yellow	yellow
THAP9	MYO9A	0.014652	yellow	yellow
THAP9	MYSM1	0.003737	yellow	yellow
THAP9	N4BP2	0.003202	yellow	yellow
THAP9	NAA25	0.024786	yellow	yellow
THAP9	NAA30	0.004321	yellow	yellow
THAP9	NAALADL2	0.000562	yellow	yellow
THAP9	NAB1	0.001676	yellow	yellow
THAP9	NAMPTP1	1.28e-07	yellow	yellow
THAP9	NAP1L5	0.000192	yellow	yellow
THAP9	NAPB	0.000143	yellow	yellow
THAP9	NAPEPLD	0.005782	yellow	yellow
THAP9	NAPG	0.000627	yellow	yellow
THAP9	NBAS	0.009831	yellow	yellow
THAP9	NBEAP2	0.00057	yellow	yellow
THAP9	NBPF19	0.000412	yellow	yellow
THAP9	NBPF26	0.000139	yellow	yellow
THAP9	NBPF3	0.000206	yellow	yellow
THAP9	NCKAP1	0.025356	yellow	yellow
THAP9	NCOA2	0.003813	yellow	yellow
THAP9	NCOA3	0.009252	yellow	yellow
THAP9	NCOR1	0.001834	yellow	yellow
THAP9	NCR3LG1	0.000834	yellow	yellow
THAP9	NDST3	1.74e-05	yellow	yellow
THAP9	NEBL	0.002066	yellow	yellow
THAP9	NEK1	0.004089	yellow	yellow
THAP9	NEK7	0.003155	yellow	yellow
THAP9	NEMF	0.013503	yellow	yellow
THAP9	NEMP2	0.001023	yellow	yellow
THAP9	NF1	0.014811	yellow	yellow
THAP9	NFATC3	0.003147	yellow	yellow
THAP9	NFIA	0.00064	yellow	yellow
THAP9	NFIB	0.001977	yellow	yellow
THAP9	NHLRC2	0.00954	yellow	yellow
THAP9	NIN	0.001171	yellow	yellow
THAP9	NIPBL	0.019676	yellow	yellow
THAP9	NKIRAS1	0.00326	yellow	yellow
THAP9	NKTR	0.001665	yellow	yellow
THAP9	NOCT	0.000135	yellow	yellow
THAP9	NOL9	0.003751	yellow	yellow
THAP9	NOMO3	1.45e-05	yellow	yellow
THAP9	NOXRED1	0.00079	yellow	yellow
THAP9	NPAT	0.029855	yellow	yellow
THAP9	NPM1P25	5.01e-06	yellow	yellow
THAP9	NR1D2	0.004261	yellow	yellow
THAP9	NR1I3	1.73e-05	yellow	yellow
THAP9	NR2C2	0.01238	yellow	yellow
THAP9	NR3C2	7.6e-06	yellow	yellow
THAP9	NRIP1	0.014967	yellow	yellow
THAP9	NSD1	0.008313	yellow	yellow
THAP9	NSD3	0.001748	yellow	yellow
THAP9	NSUN3	0.033468	yellow	yellow
THAP9	NT5DC3	8.53e-06	yellow	yellow
THAP9	NTAN1P2	0.00026	yellow	yellow
THAP9	NUDT13	0.000645	yellow	yellow
THAP9	NUDT3	0.009792	yellow	yellow
THAP9	NUDT4	0.001437	yellow	yellow
THAP9	NUFIP2	0.013539	yellow	yellow
THAP9	NUP155	0.006987	yellow	yellow
THAP9	NUP58	0.003859	yellow	yellow
THAP9	NUTM2A.AS1	0.001673	yellow	NA
THAP9	NXPE1	1.11e-07	yellow	yellow
THAP9	NXPE2	4.82e-09	yellow	yellow
THAP9	OCLN	0.001235	yellow	yellow
THAP9	ODF2L	0.002066	yellow	yellow
THAP9	OGFRL1	0.000984	yellow	yellow
THAP9	OIP5.AS1	0.002354	yellow	NA
THAP9	OPA1	0.020393	yellow	yellow
THAP9	OPHN1	0.003492	yellow	yellow
THAP9	OR56B4	3.94e-07	yellow	yellow
THAP9	OR6E1P	6.6e-09	yellow	yellow
THAP9	OSBPL8	0.003907	yellow	yellow
THAP9	OSTM1	0.002246	yellow	yellow
THAP9	OTUD3	0.000657	yellow	yellow
THAP9	OTUD4	0.019172	yellow	yellow
THAP9	OTUD7B	0.005732	yellow	yellow
THAP9	OTULIN	0.008885	yellow	yellow
THAP9	P2RX5.TAX1BP3	1.01e-05	yellow	NA
THAP9	P4HA1	5.7e-05	yellow	yellow
THAP9	PAFAH1B1	0.002563	yellow	yellow
THAP9	PAG1	0.000312	yellow	yellow
THAP9	PAIP2B	0.003218	yellow	yellow
THAP9	PANK3	0.008878	yellow	yellow
THAP9	PAPOLG	0.028966	yellow	yellow
THAP9	PAQR3	0.0055	yellow	yellow
THAP9	PARD6B	0.002434	yellow	yellow
THAP9	PARD6G.AS1	1.41e-09	yellow	NA
THAP9	PARP8	5.51e-05	yellow	yellow
THAP9	PATJ	0.006158	yellow	yellow
THAP9	PAWR	0.01448	yellow	yellow
THAP9	PAX6	9.59e-06	yellow	yellow
THAP9	PAXBP1	0.005921	yellow	yellow
THAP9	PBRM1	0.027298	yellow	yellow
THAP9	PCDHB12	4.07e-06	yellow	yellow
THAP9	PCDHB14	9.48e-06	yellow	yellow
THAP9	PCDHGA10	6.25e-11	yellow	yellow
THAP9	PCDHGC5	3.91e-06	yellow	yellow
THAP9	PCF11	0.018267	yellow	yellow
THAP9	PCGF5	0.016529	yellow	yellow
THAP9	PCMTD1	0.002412	yellow	yellow
THAP9	PCNX1	0.006191	yellow	yellow
THAP9	PCNX4	0.01009	yellow	yellow
THAP9	PDE3A	7.44e-06	yellow	yellow
THAP9	PDE3B	0.002769	yellow	yellow
THAP9	PDE4D	0.000247	yellow	yellow
THAP9	PDE7A	0.00174	yellow	yellow
THAP9	PDE8A	0.003664	yellow	yellow
THAP9	PDE8B	4.82e-05	yellow	yellow
THAP9	PDK1	0.000268	yellow	yellow
THAP9	PDLIM5	0.004011	yellow	yellow
THAP9	PDS5A	0.023626	yellow	yellow
THAP9	PDS5B	0.005035	yellow	yellow
THAP9	PDZD8	0.002806	yellow	yellow
THAP9	PEAK1	0.001591	yellow	yellow
THAP9	PGAP1	8.59e-05	yellow	yellow
THAP9	PGGT1B	0.010232	yellow	yellow
THAP9	PGM2L1	8.39e-05	yellow	yellow
THAP9	PHACTR2	0.005205	yellow	yellow
THAP9	PHF10	0.006089	yellow	yellow
THAP9	PHF3	0.028012	yellow	yellow
THAP9	PHF6	0.013442	yellow	yellow
THAP9	PHIP	0.018869	yellow	yellow
THAP9	PHLPP2	0.001964	yellow	yellow
THAP9	PHOSPHO2	0.002887	yellow	yellow
THAP9	PHTF1	0.002249	yellow	yellow
THAP9	PHTF2	0.002265	yellow	yellow
THAP9	PIAS1	0.002819	yellow	yellow
THAP9	PIAS2	0.000874	yellow	yellow
THAP9	PICALM	0.009102	yellow	yellow
THAP9	PIGN	0.002304	yellow	yellow
THAP9	PIK3C2A	0.037582	yellow	yellow
THAP9	PIK3C3	0.002662	yellow	yellow
THAP9	PIK3CA	0.022429	yellow	yellow
THAP9	PIK3R1	0.000694	yellow	yellow
THAP9	PIKFYVE	0.026049	yellow	yellow
THAP9	PJA2	0.003962	yellow	yellow
THAP9	PKD1L1	1.51e-07	yellow	yellow
THAP9	PKDREJ	0.000173	yellow	yellow
THAP9	PKN2	0.017954	yellow	yellow
THAP9	PLA2R1	4.57e-05	yellow	yellow
THAP9	PLCB1	3.89e-05	yellow	yellow
THAP9	PLCB4	2.67e-05	yellow	yellow
THAP9	PLCE1	0.000242	yellow	yellow
THAP9	PLCH1	0.001235	yellow	yellow
THAP9	PLCL1	3.54e-05	yellow	yellow
THAP9	PLCXD2	0.001413	yellow	yellow
THAP9	PLD1	0.000482	yellow	yellow
THAP9	PLEKHA1	0.004497	yellow	yellow
THAP9	PLEKHA3	0.004639	yellow	yellow
THAP9	PLEKHA8	0.006228	yellow	yellow
THAP9	PLEKHG7	3.15e-05	yellow	yellow
THAP9	PLEKHM3	0.006558	yellow	yellow
THAP9	PLGLB2	4.53e-06	yellow	yellow
THAP9	PLOD2	0.000174	yellow	yellow
THAP9	PMCH	8.23e-08	yellow	yellow
THAP9	PNRC1	0.001015	yellow	yellow
THAP9	POC1B.GALNT4	9.11e-05	yellow	NA
THAP9	POF1B	0.001572	yellow	yellow
THAP9	POLI	0.002012	yellow	yellow
THAP9	POLK	0.017561	yellow	yellow
THAP9	POU2F1	0.014461	yellow	yellow
THAP9	PPARGC1A	2.54e-06	yellow	yellow
THAP9	PPFIBP1	0.000409	yellow	yellow
THAP9	PPIAL4E	1.11e-09	yellow	yellow
THAP9	PPIP5K2	0.014717	yellow	yellow
THAP9	PPM1A	0.010726	yellow	yellow
THAP9	PPM1L	0.000816	yellow	yellow
THAP9	PPP1CB	0.017644	yellow	yellow
THAP9	PPP1R12A	0.015818	yellow	yellow
THAP9	PPP1R9A	0.000454	yellow	yellow
THAP9	PPP2R3A	0.001695	yellow	yellow
THAP9	PPP3CA	0.002309	yellow	yellow
THAP9	PPP3CB.AS1	0.000112	yellow	NA
THAP9	PPP4R2	0.041263	yellow	yellow
THAP9	PPP5D1	0.000188	yellow	yellow
THAP9	PPP6R3	0.026305	yellow	yellow
THAP9	PPTC7	0.005795	yellow	yellow
THAP9	PRDM5	0.001989	yellow	yellow
THAP9	PRDX6.AS1	4.2e-05	yellow	NA
THAP9	PRELID2	0.000953	yellow	yellow
THAP9	PRKAB2	0.001805	yellow	yellow
THAP9	PRKAR1A	0.0018	yellow	yellow
THAP9	PRKCI	0.01672	yellow	yellow
THAP9	PRKCQ	4.36e-07	yellow	yellow
THAP9	PRKD3	0.004841	yellow	yellow
THAP9	PRLR	0.000433	yellow	yellow
THAP9	PRORP	0.004205	yellow	yellow
THAP9	PROS1	1.51e-06	yellow	yellow
THAP9	PRPF4B	0.020864	yellow	yellow
THAP9	PRR14L	0.007578	yellow	yellow
THAP9	PRRC1	0.002872	yellow	yellow
THAP9	PRRG1	0.000911	yellow	yellow
THAP9	PRUNE2	1.33e-06	yellow	yellow
THAP9	PSD3	0.000247	yellow	yellow
THAP9	PSTPIP2	1.29e-06	yellow	yellow
THAP9	PTAR1	0.003294	yellow	yellow
THAP9	PTBP2	0.002263	yellow	yellow
THAP9	PTBP3	0.016572	yellow	yellow
THAP9	PTEN	0.007103	yellow	yellow
THAP9	PTP4A1	0.000463	yellow	yellow
THAP9	PTPDC1	0.00516	yellow	yellow
THAP9	PTPN11	0.01604	yellow	yellow
THAP9	PTPN13	1.27e-06	yellow	yellow
THAP9	PTPN4	0.020325	yellow	yellow
THAP9	PTPRB	0.002751	yellow	yellow
THAP9	PTPRD	4.49e-07	yellow	yellow
THAP9	PTPRG	0.011469	yellow	yellow
THAP9	PTPRJ	0.000936	yellow	yellow
THAP9	PTPRT	1.6e-06	yellow	yellow
THAP9	PURA	0.000952	yellow	yellow
THAP9	PURB	0.005312	yellow	yellow
THAP9	PUS10	0.00776	yellow	yellow
THAP9	PUS7L	0.006984	yellow	yellow
THAP9	QSER1	0.00603	yellow	yellow
THAP9	RAB11FIP2	0.002142	yellow	yellow
THAP9	RAB19	5.02e-08	yellow	yellow
THAP9	RAB21	0.01229	yellow	yellow
THAP9	RAB2B	0.001196	yellow	yellow
THAP9	RAB30	0.000776	yellow	yellow
THAP9	RAB33B	0.006425	yellow	yellow
THAP9	RAB3GAP2	0.008555	yellow	yellow
THAP9	RAB41	8.13e-05	yellow	yellow
THAP9	RABEP1	0.002264	yellow	yellow
THAP9	RABGAP1L	0.002348	yellow	yellow
THAP9	RAD51B	0.002064	yellow	yellow
THAP9	RAD9B	1.59e-05	yellow	yellow
THAP9	RALGAPA1	0.003404	yellow	yellow
THAP9	RALGAPA1P1	0.005292	yellow	yellow
THAP9	RALGPS2	0.004953	yellow	yellow
THAP9	RANBP17	0.00133	yellow	yellow
THAP9	RANBP2	0.003886	yellow	yellow
THAP9	RAP1B	0.002624	yellow	yellow
THAP9	RAP2A	0.002417	yellow	yellow
THAP9	RAP2C.AS1	0.000369	yellow	NA
THAP9	RAPGEF2	0.008266	yellow	yellow
THAP9	RAPGEF5	0.006487	yellow	yellow
THAP9	RAPGEF6	0.007387	yellow	yellow
THAP9	RAPH1	0.001425	yellow	yellow
THAP9	RASA1	0.002174	yellow	yellow
THAP9	RASA2	0.009455	yellow	yellow
THAP9	RASAL2	0.001589	yellow	yellow
THAP9	RASEF	0.000876	yellow	yellow
THAP9	RASGEF1B	0.000416	yellow	yellow
THAP9	RASGRF2	1.83e-06	yellow	yellow
THAP9	RASGRF2.AS1	2.12e-08	yellow	NA
THAP9	RASSF9	5.14e-08	yellow	yellow
THAP9	RB1CC1	0.003193	yellow	yellow
THAP9	RBAK	0.014226	yellow	yellow
THAP9	RBAK.RBAKDN	1.25e-06	yellow	NA
THAP9	RBM11	6.04e-07	yellow	yellow
THAP9	RBM12B	0.012637	yellow	yellow
THAP9	RBM12B.AS1	0.000674	yellow	NA
THAP9	RBM15	0.01591	yellow	yellow
THAP9	RBM34	0.002006	yellow	yellow
THAP9	RBM41	0.005586	yellow	yellow
THAP9	RBM5.AS1	0.00029	yellow	NA
THAP9	RBMXL1	0.004598	yellow	yellow
THAP9	RBPJ	0.008121	yellow	yellow
THAP9	RC3H1	0.006314	yellow	yellow
THAP9	RC3H2	0.026264	yellow	yellow
THAP9	RCOR3	0.001634	yellow	yellow
THAP9	RECQL	0.002828	yellow	yellow
THAP9	REEP3	0.001734	yellow	yellow
THAP9	REL	0.000587	yellow	yellow
THAP9	RELCH	0.00285	yellow	yellow
THAP9	RESF1	0.006034	yellow	yellow
THAP9	REST	0.029822	yellow	yellow
THAP9	REV1	0.022366	yellow	yellow
THAP9	REV3L	0.008733	yellow	yellow
THAP9	RFX3	0.003018	yellow	yellow
THAP9	RFX7	0.002185	yellow	yellow
THAP9	RGMB	1.56e-07	yellow	yellow
THAP9	RGMB.AS1	9.82e-07	yellow	NA
THAP9	RGPD1	1.59e-07	yellow	yellow
THAP9	RGPD3	4.46e-06	yellow	yellow
THAP9	RGPD8	0.000456	yellow	yellow
THAP9	RGS6	1.07e-08	yellow	yellow
THAP9	RHD	9.31e-06	yellow	yellow
THAP9	RIC1	0.008123	yellow	yellow
THAP9	RIC8B	0.003184	yellow	yellow
THAP9	RICTOR	0.010802	yellow	yellow
THAP9	RIF1	0.026672	yellow	yellow
THAP9	RIT1	0.001865	yellow	yellow
THAP9	RLF	0.017137	yellow	yellow
THAP9	RLIM	0.006845	yellow	yellow
THAP9	RMND5A	0.011301	yellow	yellow
THAP9	RN7SL208P	3.59e-07	yellow	yellow
THAP9	RN7SL28P	6.14e-09	yellow	yellow
THAP9	RN7SL333P	0.000108	yellow	yellow
THAP9	RNA5SP82	2.11e-05	yellow	yellow
THAP9	RND3	0.000981	yellow	yellow
THAP9	RNF11	0.001808	yellow	yellow
THAP9	RNF148	1.11e-05	yellow	yellow
THAP9	RNF168	0.00378	yellow	yellow
THAP9	RNF169	0.010554	yellow	yellow
THAP9	RNF19A	0.002623	yellow	yellow
THAP9	RNF217	0.000325	yellow	yellow
THAP9	RNU2.27P	1.15e-05	yellow	NA
THAP9	RNU4.52P	9.83e-07	yellow	NA
THAP9	RNU6.62P	3.94e-07	yellow	NA
THAP9	RNU6.695P	9.9e-09	yellow	NA
THAP9	RNU6.807P	9.95e-05	yellow	NA
THAP9	RO60	0.003038	yellow	yellow
THAP9	ROCK1	0.002315	yellow	yellow
THAP9	ROCK2	0.011731	yellow	yellow
THAP9	RPAP2	0.021832	yellow	yellow
THAP9	RPGRIP1	0.000249	yellow	yellow
THAP9	RPGRIP1L	0.006639	yellow	yellow
THAP9	RPL13P8	0.000408	yellow	yellow
THAP9	RPL21P89	1.88e-05	yellow	yellow
THAP9	RPL23AP25	1.75e-08	yellow	yellow
THAP9	RPL28P2	9.46e-05	yellow	yellow
THAP9	RPL39P16	0.000705	yellow	yellow
THAP9	RPL4P6	0.000114	yellow	yellow
THAP9	RPS10P8	4.22e-08	yellow	yellow
THAP9	RPS6KA3	0.004565	yellow	yellow
THAP9	RPS6KA5	0.001052	yellow	yellow
THAP9	RPS6KB1	0.003551	yellow	yellow
THAP9	RPS6KC1	0.001471	yellow	yellow
THAP9	RPSAP72	2.77e-07	yellow	yellow
THAP9	RRN3P2	0.000279	yellow	yellow
THAP9	RSBN1	0.027561	yellow	yellow
THAP9	RSBN1L	0.014337	yellow	yellow
THAP9	RSF1	0.024929	yellow	yellow
THAP9	RSPH9	1.04e-05	yellow	yellow
THAP9	RTTN	0.001924	yellow	yellow
THAP9	RUFY2	0.010848	yellow	yellow
THAP9	RUFY3	0.004695	yellow	yellow
THAP9	RUNDC3B	2.28e-07	yellow	yellow
THAP9	RYBP	0.010729	yellow	yellow
THAP9	RYR2	2.53e-06	yellow	yellow
THAP9	RYR3	0.000109	yellow	yellow
THAP9	S100PBP	0.008587	yellow	yellow
THAP9	SACS	0.000782	yellow	yellow
THAP9	SAMD12	0.002821	yellow	yellow
THAP9	SAMD15	8.75e-05	yellow	yellow
THAP9	SAMD3	1.38e-08	yellow	yellow
THAP9	SAMD8	0.004578	yellow	yellow
THAP9	SARNP	0.000926	yellow	yellow
THAP9	SBF2	0.017089	yellow	yellow
THAP9	SBF2.AS1	0.000494	yellow	NA
THAP9	SBNO1	0.022675	yellow	yellow
THAP9	SCAF11	0.027698	yellow	yellow
THAP9	SCAF8	0.032919	yellow	yellow
THAP9	SCAI	0.006036	yellow	yellow
THAP9	SCAPER	0.005263	yellow	yellow
THAP9	SCLT1	0.014972	yellow	yellow
THAP9	SCML4	4.95e-10	yellow	yellow
THAP9	SCOC.AS1	0.000115	yellow	NA
THAP9	SCYL2	0.011785	yellow	yellow
THAP9	SEC14L1P1	7.38e-06	yellow	yellow
THAP9	SEC1P	7.27e-08	yellow	yellow
THAP9	SEC23A	0.002595	yellow	yellow
THAP9	SEC24A	0.003992	yellow	yellow
THAP9	SECISBP2L	0.004768	yellow	yellow
THAP9	SEL1L	0.004059	yellow	yellow
THAP9	SELENOI	0.016669	yellow	yellow
THAP9	SEMA3A	2.06e-07	yellow	yellow
THAP9	SENP5	0.010899	yellow	yellow
THAP9	SENP6	0.044328	yellow	yellow
THAP9	SENP7	0.006963	yellow	yellow
THAP9	SENP8	0.00257	yellow	yellow
THAP9	SEPSECS	0.003292	yellow	yellow
THAP9	SEPTIN11	0.007057	yellow	yellow
THAP9	SESN3	4.92e-06	yellow	yellow
THAP9	SESTD1	0.002157	yellow	yellow
THAP9	SETD2	0.021335	yellow	yellow
THAP9	SETD7	0.003312	yellow	yellow
THAP9	SETX	0.0184	yellow	yellow
THAP9	SFMBT1	0.005691	yellow	yellow
THAP9	SFT2D2	0.007277	yellow	yellow
THAP9	SGMS2	0.000434	yellow	yellow
THAP9	SGPP1	0.001017	yellow	yellow
THAP9	SGTB	0.000809	yellow	yellow
THAP9	SH3TC2	8.08e-07	yellow	yellow
THAP9	SHOC2	0.020813	yellow	yellow
THAP9	SHOX	1.88e-09	yellow	yellow
THAP9	SHPRH	0.00166	yellow	yellow
THAP9	SIKE1	0.031962	yellow	yellow
THAP9	SKIL	0.001772	yellow	yellow
THAP9	SLC10A5	0.000327	yellow	yellow
THAP9	SLC10A7	0.005065	yellow	yellow
THAP9	SLC12A2	0.00051	yellow	yellow
THAP9	SLC15A2	0.000156	yellow	yellow
THAP9	SLC16A10	9.73e-06	yellow	yellow
THAP9	SLC16A14	2.15e-07	yellow	yellow
THAP9	SLC16A4	1.89e-06	yellow	yellow
THAP9	SLC16A6	5.07e-06	yellow	yellow
THAP9	SLC18A2	2.25e-05	yellow	yellow
THAP9	SLC22A13	6.68e-06	yellow	yellow
THAP9	SLC22A15	1.1e-05	yellow	yellow
THAP9	SLC22A4	3.58e-07	yellow	yellow
THAP9	SLC25A30	0.000937	yellow	yellow
THAP9	SLC25A36	0.005786	yellow	yellow
THAP9	SLC25A46	0.006293	yellow	yellow
THAP9	SLC25A51	0.005013	yellow	yellow
THAP9	SLC2A13	0.001178	yellow	yellow
THAP9	SLC30A1	0.002961	yellow	yellow
THAP9	SLC30A7	0.009542	yellow	yellow
THAP9	SLC35B4	0.003348	yellow	yellow
THAP9	SLC35F5	0.005614	yellow	yellow
THAP9	SLC36A4	9.66e-05	yellow	yellow
THAP9	SLC38A1	0.008356	yellow	yellow
THAP9	SLC38A2	0.001975	yellow	yellow
THAP9	SLC38A4	8.59e-10	yellow	yellow
THAP9	SLC38A6	0.00092	yellow	yellow
THAP9	SLC38A9	0.004245	yellow	yellow
THAP9	SLC39A10	0.00224	yellow	yellow
THAP9	SLC41A2	0.000528	yellow	yellow
THAP9	SLC44A5	1.27e-06	yellow	yellow
THAP9	SLC4A7	0.005195	yellow	yellow
THAP9	SLC5A3	0.001372	yellow	yellow
THAP9	SLC7A11	7.33e-07	yellow	yellow
THAP9	SLC9A2	9.46e-07	yellow	yellow
THAP9	SLC9A7	4.73e-06	yellow	yellow
THAP9	SLC9B1	0.000231	yellow	yellow
THAP9	SLF1	0.006277	yellow	yellow
THAP9	SLF2	0.015946	yellow	yellow
THAP9	SLK	0.005296	yellow	yellow
THAP9	SLMAP	0.008534	yellow	yellow
THAP9	SLX4IP	0.001389	yellow	yellow
THAP9	SMAD2	0.001057	yellow	yellow
THAP9	SMAD4	0.000934	yellow	yellow
THAP9	SMAD5	0.013153	yellow	yellow
THAP9	SMARCAD1	0.025759	yellow	yellow
THAP9	SMC5	0.020105	yellow	yellow
THAP9	SMCHD1	0.00093	yellow	yellow
THAP9	SMG1	0.023946	yellow	yellow
THAP9	SMIM13	0.005557	yellow	yellow
THAP9	SMIM17	3.88e-06	yellow	yellow
THAP9	SMIM8	0.00425	yellow	yellow
THAP9	SMURF2	0.002873	yellow	yellow
THAP9	SNAPC3	0.004057	yellow	yellow
THAP9	SNHG16	0.003286	yellow	yellow
THAP9	SNHG31	4.32e-05	yellow	yellow
THAP9	SNORA11F	0.000278	yellow	yellow
THAP9	SNORA15B.2	8.77e-06	yellow	NA
THAP9	SNORA9B	1.5e-06	yellow	yellow
THAP9	SNORD116.4	2.85e-07	yellow	NA
THAP9	SNORD19C	0.000208	yellow	yellow
THAP9	SNRK	0.005242	yellow	yellow
THAP9	SNRPCP16	1.2e-08	yellow	yellow
THAP9	SNTB2	0.010454	yellow	yellow
THAP9	SNX13	0.010376	yellow	yellow
THAP9	SNX25	0.003695	yellow	yellow
THAP9	SNX27	0.003051	yellow	yellow
THAP9	SOAT1	0.000954	yellow	yellow
THAP9	SOCS4	0.013463	yellow	yellow
THAP9	SOCS5	0.012962	yellow	yellow
THAP9	SOCS6	0.000715	yellow	yellow
THAP9	SON	0.017328	yellow	yellow
THAP9	SOS1	0.013474	yellow	yellow
THAP9	SOS2	0.006719	yellow	yellow
THAP9	SP1	0.012052	yellow	yellow
THAP9	SP2.AS1	0.00136	yellow	NA
THAP9	SP3	0.037513	yellow	yellow
THAP9	SP4	0.003488	yellow	yellow
THAP9	SPAG9	0.009072	yellow	yellow
THAP9	SPATA5	0.007511	yellow	yellow
THAP9	SPATA6	0.000511	yellow	yellow
THAP9	SPATA9	1.59e-05	yellow	yellow
THAP9	SPCS3	0.010658	yellow	yellow
THAP9	SPECC1L.ADORA2A	9.95e-07	yellow	NA
THAP9	SPG11	0.004788	yellow	yellow
THAP9	SPICE1	0.004983	yellow	yellow
THAP9	SPIN1	0.011216	yellow	yellow
THAP9	SPOPL	0.017282	yellow	yellow
THAP9	SPRED1	0.001258	yellow	yellow
THAP9	SPRY3	0.000671	yellow	yellow
THAP9	SPRY4.AS1	5.27e-07	yellow	NA
THAP9	SPTY2D1	0.010593	yellow	yellow
THAP9	SPZ1	6.05e-09	yellow	yellow
THAP9	SRBD1	0.006975	yellow	yellow
THAP9	SREK1	0.008723	yellow	yellow
THAP9	SRGAP1	0.000259	yellow	yellow
THAP9	SRPK2	0.010714	yellow	yellow
THAP9	SSH2	0.003069	yellow	yellow
THAP9	ST6GALNAC3	3e-08	yellow	yellow
THAP9	ST7L	0.00851	yellow	yellow
THAP9	STAG1	0.019139	yellow	yellow
THAP9	STAM2	0.020112	yellow	yellow
THAP9	STEAP2	9.26e-05	yellow	yellow
THAP9	STK17A	0.001613	yellow	yellow
THAP9	STK17B	0.000978	yellow	yellow
THAP9	STK38L	0.001586	yellow	yellow
THAP9	STON2	0.000132	yellow	yellow
THAP9	STRN	0.022877	yellow	yellow
THAP9	STRN3	0.00875	yellow	yellow
THAP9	STX12	0.002626	yellow	yellow
THAP9	STX17	0.019504	yellow	yellow
THAP9	STX2	0.000202	yellow	yellow
THAP9	STX7	0.005226	yellow	yellow
THAP9	STXBP4	0.002255	yellow	yellow
THAP9	STXBP5	0.005468	yellow	yellow
THAP9	STYX	0.006399	yellow	yellow
THAP9	SUCLG2.AS1	0.002865	yellow	NA
THAP9	SUCO	0.003	yellow	yellow
THAP9	SULT1B1	2.24e-07	yellow	yellow
THAP9	SVIL.AS1	0.000954	yellow	NA
THAP9	SWT1	0.00429	yellow	yellow
THAP9	SYDE2	0.004098	yellow	yellow
THAP9	SYNE2	0.002886	yellow	yellow
THAP9	SYNJ1	0.002562	yellow	yellow
THAP9	SYNJ2BP	0.006142	yellow	yellow
THAP9	SYT1	1.51e-07	yellow	yellow
THAP9	SYTL4	4.29e-05	yellow	yellow
THAP9	TAB3	0.001652	yellow	yellow
THAP9	TACC1	0.000661	yellow	yellow
THAP9	TANC1	0.009233	yellow	yellow
THAP9	TAOK1	0.011763	yellow	yellow
THAP9	TARS3	0.002865	yellow	yellow
THAP9	TASOR	0.035093	yellow	yellow
THAP9	TASOR2	0.030144	yellow	yellow
THAP9	TBC1D12	0.007646	yellow	yellow
THAP9	TBC1D19	0.001712	yellow	yellow
THAP9	TBC1D32	0.003118	yellow	yellow
THAP9	TBC1D8B	0.004357	yellow	yellow
THAP9	TBCK	0.009499	yellow	yellow
THAP9	TBL1XR1	0.013188	yellow	yellow
THAP9	TBX18	7.97e-10	yellow	yellow
THAP9	TBX20	2.55e-08	yellow	yellow
THAP9	TCP11L1	0.001514	yellow	yellow
THAP9	TCP11L2	8.95e-05	yellow	yellow
THAP9	TDRD6	0.000106	yellow	yellow
THAP9	TEAD1	0.002063	yellow	yellow
THAP9	TEC	0.000448	yellow	yellow
THAP9	TENT5A	3.37e-06	yellow	yellow
THAP9	TET2	0.001563	yellow	yellow
THAP9	TEX9	4.49e-05	yellow	yellow
THAP9	TGFBR1	0.001189	yellow	yellow
THAP9	TGFBR3	8.15e-06	yellow	yellow
THAP9	THADA	0.00978	yellow	yellow
THAP9	THAP5	0.009358	yellow	yellow
THAP9	THAP6	0.021451	yellow	yellow
THAP9	TIA1	0.009706	yellow	yellow
THAP9	TIAM2	0.000493	yellow	yellow
THAP9	TIGD7	0.000263	yellow	yellow
THAP9	TIPARP	0.000615	yellow	yellow
THAP9	TJP1	0.000962	yellow	yellow
THAP9	TLCD4	0.000304	yellow	yellow
THAP9	TLCD4.RWDD3	0.002685	yellow	NA
THAP9	TLK1	0.017519	yellow	yellow
THAP9	TLR3	9.63e-06	yellow	yellow
THAP9	TLR4	3.27e-07	yellow	yellow
THAP9	TM2D1	0.006225	yellow	yellow
THAP9	TMC3	1.43e-05	yellow	yellow
THAP9	TMED7.TICAM2	2.61e-05	yellow	NA
THAP9	TMED8	0.009609	yellow	yellow
THAP9	TMEM106B	0.003188	yellow	yellow
THAP9	TMEM131L	0.000272	yellow	yellow
THAP9	TMEM135	0.005321	yellow	yellow
THAP9	TMEM154	3.63e-06	yellow	yellow
THAP9	TMEM161B	0.004145	yellow	yellow
THAP9	TMEM168	0.007426	yellow	yellow
THAP9	TMEM170B	0.000683	yellow	yellow
THAP9	TMEM181	0.007621	yellow	yellow
THAP9	TMEM19	1.63e-05	yellow	yellow
THAP9	TMEM232	9.58e-05	yellow	yellow
THAP9	TMEM245	0.006285	yellow	yellow
THAP9	TMEM263	0.000179	yellow	yellow
THAP9	TMEM30A	0.007645	yellow	yellow
THAP9	TMEM64	9.56e-05	yellow	yellow
THAP9	TMEM65	0.000626	yellow	yellow
THAP9	TMF1	0.017544	yellow	yellow
THAP9	TMOD2	0.00017	yellow	yellow
THAP9	TMPPE	0.001002	yellow	yellow
THAP9	TMSB15B	2.25e-07	yellow	yellow
THAP9	TMTC2	0.001818	yellow	yellow
THAP9	TMTC3	0.009378	yellow	yellow
THAP9	TMX3	0.00676	yellow	yellow
THAP9	TNFSF15	7.48e-06	yellow	yellow
THAP9	TNKS2	0.019145	yellow	yellow
THAP9	TNKS2.AS1	8.75e-09	yellow	NA
THAP9	TNPO1	0.03661	yellow	yellow
THAP9	TNRC6B	0.002319	yellow	yellow
[truncated: 373 more rows]

## Sheet: ESCA_normal
gene1	gene2	correlation	module1	module2
[truncated: 4,600 more rows]

[truncated: 28 more sheets: ESCA_tumor, GBM_normal, GBM_tumor, HNSC_normal, HNSC_tumor, KICH_normal, KICH_tumor, KIRC_normal, KIRC_tumor, KIRP_normal, KIRP_tumor, LIHC_normal, LIHC_tumor, LUAD_normal, LUAD_tumor, LUSC_normal, LUSC_tumor, PAAD_tumor, PRAD_normal, PRAD_tumor …]
