# Supplementary material for: Pan-Cancer Analysis Reveals the Prognostic Potential of the THAP9/THAP9-AS1 Sense–Antisense Gene Pair in Human Cancers
Source: Noncoding RNA. 2022 Jul 8;8(4):51. doi: 10.3390/ncrna8040051 (PMC9326536; doi:10.3390/ncrna8040051)
Supplement: Supplementary file 1 [file ncrna-08-00051-s001.zip › Supplementary Table S9.xlsx]

## Sheet: BLCA_normal
gene1	gene2	correlation	module1	module2
THAP9-AS1	AAK1	0.033519	brown	brown
THAP9-AS1	AASDH	0.039854	brown	brown
THAP9-AS1	ABAT	0.044516	brown	brown
THAP9-AS1	ABCC10	0.087687	brown	brown
THAP9-AS1	ABCC3	0.138194	brown	brown
THAP9-AS1	ABHD1	0.001325	brown	brown
THAP9-AS1	ABHD10	0.002563	brown	brown
THAP9-AS1	ABHD14A.ACY1	0.108762	brown	NA
THAP9-AS1	ABR	0.048764	brown	brown
THAP9-AS1	ACAD8	0.012068	brown	brown
THAP9-AS1	ACADL	0.012085	brown	brown
THAP9-AS1	ACBD5	0.035317	brown	brown
THAP9-AS1	ACIN1	0.136631	brown	brown
THAP9-AS1	ACKR4	0.071193	brown	brown
THAP9-AS1	ACOT13	0.010541	brown	brown
THAP9-AS1	ACOX1	0.033682	brown	brown
THAP9-AS1	ACP6	0.018037	brown	brown
THAP9-AS1	ACSM1	0.047823	brown	brown
THAP9-AS1	ACTR3C	0.029977	brown	brown
THAP9-AS1	ACTR8	0.019978	brown	brown
THAP9-AS1	ADA2	0.020839	brown	brown
THAP9-AS1	ADAM21P1	0.003095	brown	brown
THAP9-AS1	ADAMTS13	0.11271	brown	brown
THAP9-AS1	ADAT1	0.077422	brown	brown
THAP9-AS1	ADCY10P1	0.097042	brown	brown
THAP9-AS1	ADCY6	0.06945	brown	brown
THAP9-AS1	ADGRF5P1	0.04321	brown	brown
THAP9-AS1	ADGRG6	0.06989	brown	brown
THAP9-AS1	AGAP4	0.058627	brown	brown
THAP9-AS1	AGAP5	0.05174	brown	brown
THAP9-AS1	AGAP9	0.127182	brown	brown
THAP9-AS1	AGBL2	0.106759	brown	brown
THAP9-AS1	AGGF1	0.012512	brown	brown
THAP9-AS1	AGRP	0.014636	brown	brown
THAP9-AS1	AHR	0.050377	brown	brown
THAP9-AS1	AHSA2P	0.156247	brown	brown
THAP9-AS1	AIDAP2	0.038208	brown	brown
THAP9-AS1	ALB	0.022526	brown	brown
THAP9-AS1	ALDH1L1.AS1	0.041811	brown	NA
THAP9-AS1	ALDH1L1.AS2	0.014425	brown	NA
THAP9-AS1	ALG12	0.013859	brown	brown
THAP9-AS1	ALKBH4	0.002512	brown	brown
THAP9-AS1	ALOX5	0.024692	brown	brown
THAP9-AS1	AMIGO2	0.009311	brown	brown
THAP9-AS1	AMY2B	0.151372	brown	brown
THAP9-AS1	AMZ2	0.006982	brown	brown
THAP9-AS1	ANAPC4	0.081997	brown	brown
THAP9-AS1	ANK3	0.114315	brown	brown
THAP9-AS1	ANKDD1B	0.1496	brown	brown
THAP9-AS1	ANKMY1	0.079841	brown	brown
THAP9-AS1	ANKMY2	0.039812	brown	brown
THAP9-AS1	ANKRA2	0.063101	brown	brown
THAP9-AS1	ANKRD10	0.014034	brown	brown
THAP9-AS1	ANKRD24	0.056868	brown	brown
THAP9-AS1	ANKRD46	0.019399	brown	brown
THAP9-AS1	ANKRD49	0.004757	brown	brown
THAP9-AS1	ANKRD65	0.009967	brown	brown
THAP9-AS1	ANXA9	0.019265	brown	brown
THAP9-AS1	AP4B1.AS1	0.114579	brown	NA
THAP9-AS1	AP4M1	0.006503	brown	brown
THAP9-AS1	AP5S1	0.007338	brown	brown
THAP9-AS1	APAF1	0.021858	brown	brown
THAP9-AS1	APBA1	0.019091	brown	brown
THAP9-AS1	APELA	0.000698	brown	brown
THAP9-AS1	APOA5	0.001892	brown	brown
THAP9-AS1	APPL2	0.024056	brown	brown
THAP9-AS1	AR	0.01777	brown	brown
THAP9-AS1	ARAP1.AS2	0.144975	brown	NA
THAP9-AS1	ARFGEF1	0.097724	brown	brown
THAP9-AS1	ARFGEF3	0.09394	brown	brown
THAP9-AS1	ARHGAP12	0.097629	brown	brown
THAP9-AS1	ARHGAP18	0.034332	brown	brown
THAP9-AS1	ARHGAP8	0.132704	brown	brown
THAP9-AS1	ARHGEF10L	0.036169	brown	brown
THAP9-AS1	ARHGEF7	0.053473	brown	brown
THAP9-AS1	ARMCX5	0.093832	brown	brown
THAP9-AS1	ARMCX6	0.006135	brown	brown
THAP9-AS1	ARRDC3.AS1	0.063483	brown	NA
THAP9-AS1	ARSD	0.033682	brown	brown
THAP9-AS1	ARSG	0.021762	brown	brown
THAP9-AS1	ASAH1	0.057834	brown	brown
THAP9-AS1	ASB16.AS1	0.008844	brown	NA
THAP9-AS1	ASCL2	0.01187	brown	brown
THAP9-AS1	ASF1A	0.019625	brown	brown
THAP9-AS1	ASH2L	0.002975	brown	brown
THAP9-AS1	ASPA	0.0551	brown	brown
THAP9-AS1	ASPDH	0.127783	brown	brown
THAP9-AS1	ASS1P10	0.039792	brown	brown
THAP9-AS1	ASS1P2	0.005572	brown	brown
THAP9-AS1	ASTE1	0.042138	brown	brown
THAP9-AS1	ATAD3C	0.030161	brown	brown
THAP9-AS1	ATAT1	0.165392	brown	brown
THAP9-AS1	ATF7IP	0.010262	brown	brown
THAP9-AS1	ATG4C	0.001131	brown	brown
THAP9-AS1	ATP2C1	0.040782	brown	brown
THAP9-AS1	ATP6V1E2	0.012034	brown	brown
THAP9-AS1	ATP7A	0.043777	brown	brown
THAP9-AS1	ATP8B1	0.158145	brown	brown
THAP9-AS1	ATPSCKMT	0.008618	brown	brown
THAP9-AS1	ATRN	0.017503	brown	brown
THAP9-AS1	ATXN7L3B	0.049636	brown	brown
THAP9-AS1	AZIN2	0.007123	brown	brown
THAP9-AS1	B3GALNT1	0.031047	brown	brown
THAP9-AS1	B3GAT1	0.005027	brown	brown
THAP9-AS1	B3GLCT	0.001074	brown	brown
THAP9-AS1	B3GNTL1	0.059598	brown	brown
THAP9-AS1	BAHD1	0.029804	brown	brown
THAP9-AS1	BAIAP2.DT	0.020022	brown	NA
THAP9-AS1	BANK1	0.014751	brown	brown
THAP9-AS1	BBS2	0.02262	brown	brown
THAP9-AS1	BCDIN3D	0.00587	brown	brown
THAP9-AS1	BCKDHB	0.100217	brown	brown
THAP9-AS1	BCL11A	0.00343	brown	brown
THAP9-AS1	BCL2	0.006726	brown	brown
THAP9-AS1	BDH2	0.035121	brown	brown
THAP9-AS1	BDNF.AS	0.026653	brown	NA
THAP9-AS1	BEND3	0.006132	brown	brown
THAP9-AS1	BEND3P2	0.000833	brown	brown
THAP9-AS1	BET1	0.0154	brown	brown
THAP9-AS1	BET1L	0.02834	brown	brown
THAP9-AS1	BIRC2	0.04429	brown	brown
THAP9-AS1	BIVM	0.011636	brown	brown
THAP9-AS1	BLOC1S5	0.007063	brown	brown
THAP9-AS1	BMF	0.002711	brown	brown
THAP9-AS1	BMP3	0.010388	brown	brown
THAP9-AS1	BMS1P10	0.018811	brown	brown
THAP9-AS1	BNIP3P16	0.064231	brown	brown
THAP9-AS1	BOLA2P2	0.115801	brown	brown
THAP9-AS1	BPHL	0.059937	brown	brown
THAP9-AS1	BRCC3	0.002426	brown	brown
THAP9-AS1	BRWD1P3	0.03075	brown	brown
THAP9-AS1	BTAF1	0.068104	brown	brown
THAP9-AS1	C12orf60	0.00576	brown	brown
THAP9-AS1	C12orf65	0.018622	brown	brown
THAP9-AS1	C12orf66	0.035583	brown	brown
THAP9-AS1	C12orf76	0.003362	brown	brown
THAP9-AS1	C14orf93	0.013207	brown	brown
THAP9-AS1	C15orf40	0.009405	brown	brown
THAP9-AS1	C16orf70	0.003884	brown	brown
THAP9-AS1	C16orf71	0.007671	brown	brown
THAP9-AS1	C16orf87	0.006917	brown	brown
THAP9-AS1	C17orf113	0.010687	brown	brown
THAP9-AS1	C17orf75	0.009081	brown	brown
THAP9-AS1	C18orf32	0.010952	brown	brown
THAP9-AS1	C19orf71	0.028626	brown	brown
THAP9-AS1	C1orf174	0.020199	brown	brown
THAP9-AS1	C1RL.AS1	0.102444	brown	NA
THAP9-AS1	C20orf197	0.000752	brown	brown
THAP9-AS1	C20orf96	0.016691	brown	brown
THAP9-AS1	C21orf91	0.00288	brown	brown
THAP9-AS1	C2CD2	0.050467	brown	brown
THAP9-AS1	C2orf15	0.026265	brown	brown
THAP9-AS1	C2orf68	0.023559	brown	brown
THAP9-AS1	C3orf20	0.005508	brown	brown
THAP9-AS1	C3orf33	0.011999	brown	brown
THAP9-AS1	C3orf35	0.06961	brown	brown
THAP9-AS1	C5orf51	0.002465	brown	brown
THAP9-AS1	C5orf63	0.06332	brown	brown
THAP9-AS1	C6orf163	0.049882	brown	brown
THAP9-AS1	C7orf25	0.00881	brown	brown
THAP9-AS1	C7orf31	0.003773	brown	brown
THAP9-AS1	C8orf33	0.004122	brown	brown
THAP9-AS1	C9orf152	0.020062	brown	brown
THAP9-AS1	C9orf85	0.024796	brown	brown
THAP9-AS1	CACNB1	0.032248	brown	brown
THAP9-AS1	CACNB3	0.023019	brown	brown
THAP9-AS1	CAD	0.004116	brown	brown
THAP9-AS1	CAPN10.DT	0.123283	brown	NA
THAP9-AS1	CAPN5	0.045511	brown	brown
THAP9-AS1	CARD11	0.015283	brown	brown
THAP9-AS1	CARD8	0.005775	brown	brown
THAP9-AS1	CASK	0.005383	brown	brown
THAP9-AS1	CASKIN1	0.082028	brown	brown
THAP9-AS1	CASP8	0.089147	brown	brown
THAP9-AS1	CAT	0.052904	brown	brown
THAP9-AS1	CATSPER2	0.154674	brown	brown
THAP9-AS1	CATSPERE	0.09507	brown	brown
THAP9-AS1	CBR4	0.049468	brown	brown
THAP9-AS1	CBWD3	0.146832	brown	brown
THAP9-AS1	CBY1	0.000359	brown	brown
THAP9-AS1	CCDC115	0.022629	brown	brown
THAP9-AS1	CCDC116	0.022476	brown	brown
THAP9-AS1	CCDC122	0.031346	brown	brown
THAP9-AS1	CCDC138	0.01609	brown	brown
THAP9-AS1	CCDC14	0.119324	brown	brown
THAP9-AS1	CCDC142	0.041086	brown	brown
THAP9-AS1	CCDC15	0.006883	brown	brown
THAP9-AS1	CCDC169	0.030093	brown	brown
THAP9-AS1	CCDC171	0.016982	brown	brown
THAP9-AS1	CCDC174	0.0249	brown	brown
THAP9-AS1	CCDC183.AS1	0.090564	brown	NA
THAP9-AS1	CCDC191	0.089522	brown	brown
THAP9-AS1	CCDC24	0.018044	brown	brown
THAP9-AS1	CCDC28A	0.008009	brown	brown
THAP9-AS1	CCDC32	0.011689	brown	brown
THAP9-AS1	CCDC57	0.107463	brown	brown
THAP9-AS1	CCDC62	0.010623	brown	brown
THAP9-AS1	CCDC71	0.036535	brown	brown
THAP9-AS1	CCDC82	0.023131	brown	brown
THAP9-AS1	CCDC90B	0.012768	brown	brown
THAP9-AS1	CCNB1IP1	0.024148	brown	brown
THAP9-AS1	CCNB3	0.065292	brown	brown
THAP9-AS1	CCNO	0.039041	brown	brown
THAP9-AS1	CCNT2	0.156958	brown	brown
THAP9-AS1	CCSER1	0.061674	brown	brown
THAP9-AS1	CCT6P3	0.02719	brown	brown
THAP9-AS1	CCT8P1	0.012413	brown	brown
THAP9-AS1	CCZ1B	0.006433	brown	brown
THAP9-AS1	CD2AP	0.025492	brown	brown
THAP9-AS1	CD46	0.158217	brown	brown
THAP9-AS1	CD96	0.01603	brown	brown
THAP9-AS1	CDAN1	0.020336	brown	brown
THAP9-AS1	CDC14B	0.023154	brown	brown
THAP9-AS1	CDC23	0.011318	brown	brown
THAP9-AS1	CDH10	0.00157	brown	brown
THAP9-AS1	CDKN1B	0.000417	brown	brown
THAP9-AS1	CDRT4	0.135846	brown	brown
THAP9-AS1	CECR2	0.018034	brown	brown
THAP9-AS1	CEMIP2	0.032375	brown	brown
THAP9-AS1	CEP192	0.039441	brown	brown
THAP9-AS1	CEP250	0.0015	brown	brown
THAP9-AS1	CEP76	0.011798	brown	brown
THAP9-AS1	CEP83	0.128185	brown	brown
THAP9-AS1	CEP85	0.010978	brown	brown
THAP9-AS1	CEP95	0.113217	brown	brown
THAP9-AS1	CEPT1	0.071419	brown	brown
THAP9-AS1	CES4A	0.181773	brown	brown
THAP9-AS1	CETN3	0.023742	brown	brown
THAP9-AS1	CFAP100	0.003031	brown	brown
THAP9-AS1	CFAP44	0.125232	brown	brown
THAP9-AS1	CFAP70	0.120846	brown	brown
THAP9-AS1	CFLAR.AS1	0.102825	brown	NA
THAP9-AS1	CHAD	0.151505	brown	brown
THAP9-AS1	CHD1L	0.007998	brown	brown
THAP9-AS1	CHD3	0.051465	brown	brown
THAP9-AS1	CHD7	0.095189	brown	brown
THAP9-AS1	CHKB.CPT1B	0.149326	brown	NA
THAP9-AS1	CHPT1	0.005525	brown	brown
THAP9-AS1	CHRFAM7A	0.008726	brown	brown
THAP9-AS1	CHRM5	0.061883	brown	brown
THAP9-AS1	CHRNA7	0.01428	brown	brown
THAP9-AS1	CHRNB1	0.001639	brown	brown
THAP9-AS1	CHST14	0.018451	brown	brown
THAP9-AS1	CHTF8	0.015491	brown	brown
THAP9-AS1	CIAO1	0.056997	brown	brown
THAP9-AS1	CLBA1	0.0311	brown	brown
THAP9-AS1	CLCN2	0.079723	brown	brown
THAP9-AS1	CLCN7	0.017814	brown	brown
THAP9-AS1	CLDN12	0.019174	brown	brown
THAP9-AS1	CLEC9A	0.034924	brown	brown
THAP9-AS1	CLK2	0.093543	brown	brown
THAP9-AS1	CLMN	0.164363	brown	brown
THAP9-AS1	CLPB	0.002176	brown	brown
THAP9-AS1	CLUHP3	0.21568	brown	brown
THAP9-AS1	CLUL1	0.005468	brown	brown
THAP9-AS1	CMTM4	0.01976	brown	brown
THAP9-AS1	CMTM6	0.079462	brown	brown
THAP9-AS1	CMTR2	0.039743	brown	brown
THAP9-AS1	CNBD2	0.0299	brown	brown
THAP9-AS1	CNDP2	0.023258	brown	brown
THAP9-AS1	CNEP1R1	0.013011	brown	brown
THAP9-AS1	CNGA1	0.012071	brown	brown
THAP9-AS1	CNNM2	0.019399	brown	brown
THAP9-AS1	CNNM3	0.018215	brown	brown
THAP9-AS1	CNTN3	0.005001	brown	brown
THAP9-AS1	COG2	0.011968	brown	brown
THAP9-AS1	COG3	0.097301	brown	brown
THAP9-AS1	COG6	0.01338	brown	brown
THAP9-AS1	COG8	0.007153	brown	brown
THAP9-AS1	COL27A1	0.092096	brown	brown
THAP9-AS1	COLCA1	0.141769	brown	brown
THAP9-AS1	COLQ	0.044214	brown	brown
THAP9-AS1	COMMD8	0.002484	brown	brown
THAP9-AS1	COPS7B	0.00976	brown	brown
THAP9-AS1	COQ5	0.004408	brown	brown
THAP9-AS1	CORT	8.31e-05	brown	brown
THAP9-AS1	COX10.AS1	0.010753	brown	NA
THAP9-AS1	COX18	0.023469	brown	brown
THAP9-AS1	COX19	0.032185	brown	brown
THAP9-AS1	CPNE4	0.026951	brown	brown
THAP9-AS1	CPNE7	0.144539	brown	brown
THAP9-AS1	CPT1B	0.111157	brown	brown
THAP9-AS1	CRAMP1	0.042701	brown	brown
THAP9-AS1	CREBZF	0.132674	brown	brown
THAP9-AS1	CRELD1	0.002383	brown	brown
THAP9-AS1	CRKL	0.012871	brown	brown
THAP9-AS1	CROCCP2	0.011147	brown	brown
THAP9-AS1	CSE1L	0.001252	brown	brown
THAP9-AS1	CSMD1	0.123825	brown	brown
THAP9-AS1	CST1	0.027613	brown	brown
THAP9-AS1	CTAGE12P	0.023692	brown	brown
THAP9-AS1	CTAGE7P	0.104213	brown	brown
THAP9-AS1	CTBP1.AS	0.164132	brown	NA
THAP9-AS1	CTPS2	0.006732	brown	brown
THAP9-AS1	CTRB1	0.083114	brown	brown
THAP9-AS1	CTSO	0.013964	brown	brown
THAP9-AS1	CUL7	0.064126	brown	brown
THAP9-AS1	CXADR	0.070374	brown	brown
THAP9-AS1	CYP20A1	0.037665	brown	brown
THAP9-AS1	CYP27A1	0.020481	brown	brown
THAP9-AS1	CYP2C8	0.099559	brown	brown
THAP9-AS1	CYP39A1	0.005397	brown	brown
THAP9-AS1	CYP4A11	0.080043	brown	brown
THAP9-AS1	CYREN	0.005049	brown	brown
THAP9-AS1	D2HGDH	0.098863	brown	brown
THAP9-AS1	DAB1	0.005824	brown	brown
THAP9-AS1	DAPK1	0.044483	brown	brown
THAP9-AS1	DBIL5P	0.017292	brown	brown
THAP9-AS1	DBP	0.000974	brown	brown
THAP9-AS1	DBR1	0.003764	brown	brown
THAP9-AS1	DCAF13P1	0.002764	brown	brown
THAP9-AS1	DCAF7	0.015879	brown	brown
THAP9-AS1	DCAKD	0.019945	brown	brown
THAP9-AS1	DCDC2	0.013927	brown	brown
THAP9-AS1	DCDC2B	0.098811	brown	brown
THAP9-AS1	DCLRE1A	0.013981	brown	brown
THAP9-AS1	DCP2	0.007247	brown	brown
THAP9-AS1	DDI2	0.034836	brown	brown
THAP9-AS1	DDTL	0.090268	brown	brown
THAP9-AS1	DDX20	0.007267	brown	brown
THAP9-AS1	DDX39B	0.158693	brown	brown
THAP9-AS1	DEF8	0.007234	brown	brown
THAP9-AS1	DELE1	0.044106	brown	brown
THAP9-AS1	DENND11	0.016899	brown	brown
THAP9-AS1	DENND4B	0.053389	brown	brown
THAP9-AS1	DEPDC4	0.010001	brown	brown
THAP9-AS1	DFFA	0.01254	brown	brown
THAP9-AS1	DFFB	0.011935	brown	brown
THAP9-AS1	DGCR2	0.037439	brown	brown
THAP9-AS1	DGKZP1	0.04157	brown	brown
THAP9-AS1	DGLUCY	0.017024	brown	brown
THAP9-AS1	DHRS2	0.010658	brown	brown
THAP9-AS1	DHRS4.AS1	0.00496	brown	NA
THAP9-AS1	DIP2A	0.059115	brown	brown
THAP9-AS1	DLEC1	0.164677	brown	brown
THAP9-AS1	DLG1.AS1	0.008698	brown	NA
THAP9-AS1	DMAC2L	0.049409	brown	brown
THAP9-AS1	DMTN	0.014175	brown	brown
THAP9-AS1	DNAAF4	0.010007	brown	brown
THAP9-AS1	DNAH12	0.03176	brown	brown
THAP9-AS1	DNAH14	0.006256	brown	brown
THAP9-AS1	DNAH5	0.019062	brown	brown
THAP9-AS1	DNAI4	0.001798	brown	brown
THAP9-AS1	DNAJB7	0.053425	brown	brown
THAP9-AS1	DNAJC14	0.046168	brown	brown
THAP9-AS1	DNAJC16	0.046085	brown	brown
THAP9-AS1	DNAJC28	0.004709	brown	brown
THAP9-AS1	DNASE1	0.026241	brown	brown
THAP9-AS1	DNM2	0.039728	brown	brown
THAP9-AS1	DNMBP.AS1	0.080896	brown	NA
THAP9-AS1	DNMT3A	0.001732	brown	brown
THAP9-AS1	DNMT3B	0.009629	brown	brown
THAP9-AS1	DOCK6	0.076832	brown	brown
THAP9-AS1	DPP9.AS1	0.158576	brown	NA
THAP9-AS1	DPRXP4	0.010051	brown	brown
THAP9-AS1	DPY19L4	0.030356	brown	brown
THAP9-AS1	DROSHA	0.002819	brown	brown
THAP9-AS1	DSG2	0.097447	brown	brown
THAP9-AS1	DUS4L	0.031496	brown	brown
THAP9-AS1	DUSP28	0.055124	brown	brown
THAP9-AS1	DUX4L26	0.075387	brown	brown
THAP9-AS1	DYRK2	0.022966	brown	brown
THAP9-AS1	DZANK1	0.061301	brown	brown
THAP9-AS1	EARS2	0.033805	brown	brown
THAP9-AS1	ECHDC2	0.107023	brown	brown
THAP9-AS1	EDARADD	0.021511	brown	brown
THAP9-AS1	EDC3	0.01666	brown	brown
THAP9-AS1	EDEM1	0.086835	brown	brown
THAP9-AS1	EEF1GP4	0.019534	brown	brown
THAP9-AS1	EFCAB11	0.045457	brown	brown
THAP9-AS1	EFCAB13	0.05487	brown	brown
THAP9-AS1	EFCAB14	0.069628	brown	brown
THAP9-AS1	EFHB	0.005976	brown	brown
THAP9-AS1	EFHC1	0.148479	brown	brown
THAP9-AS1	EHD4.AS1	0.101318	brown	NA
THAP9-AS1	EHHADH	0.012449	brown	brown
THAP9-AS1	EHMT2	0.001945	brown	brown
THAP9-AS1	EIF1B.AS1	0.001825	brown	NA
THAP9-AS1	EIF2AK3.DT	0.016325	brown	NA
THAP9-AS1	EIF2D	0.006771	brown	brown
THAP9-AS1	EIF3J.DT	0.016271	brown	NA
THAP9-AS1	ELAC1	0.004224	brown	brown
THAP9-AS1	ELF5	0.031647	brown	brown
THAP9-AS1	ELK4	0.07232	brown	brown
THAP9-AS1	ELMOD3	0.075078	brown	brown
THAP9-AS1	ELOVL6	0.021154	brown	brown
THAP9-AS1	ELP2	0.010365	brown	brown
THAP9-AS1	EMC1.AS1	0.013178	brown	NA
THAP9-AS1	EML4	0.08981	brown	brown
THAP9-AS1	ENGASE	0.155645	brown	brown
THAP9-AS1	ENKUR	0.006218	brown	brown
THAP9-AS1	ENOSF1	0.105492	brown	brown
THAP9-AS1	ENPP7P4	0.016756	brown	brown
THAP9-AS1	ENPP7P7	0.014908	brown	brown
THAP9-AS1	EPB41	0.069844	brown	brown
THAP9-AS1	EPHA10	0.018378	brown	brown
THAP9-AS1	EPHA4	0.010406	brown	brown
THAP9-AS1	EPHB2	0.004991	brown	brown
THAP9-AS1	EPM2AIP1	0.028264	brown	brown
THAP9-AS1	EPPIN	0.000952	brown	brown
THAP9-AS1	ERBB4	0.027247	brown	brown
THAP9-AS1	ERCC3	0.02826	brown	brown
THAP9-AS1	ERI2	0.016804	brown	brown
THAP9-AS1	ERICH5	0.005671	brown	brown
THAP9-AS1	ERLEC1	0.008139	brown	brown
THAP9-AS1	ERMAP	0.07137	brown	brown
THAP9-AS1	ERP27	0.039803	brown	brown
THAP9-AS1	ERV3.1	0.014309	brown	NA
THAP9-AS1	ERVMER34.1	0.008143	brown	NA
THAP9-AS1	ETAA1	0.009135	brown	brown
THAP9-AS1	ETV3	0.092646	brown	brown
THAP9-AS1	EVPLL	0.06336	brown	brown
THAP9-AS1	EXD2	0.001258	brown	brown
THAP9-AS1	EXO5	0.014476	brown	brown
THAP9-AS1	EXOC1L	0.016606	brown	brown
THAP9-AS1	EXOC2	0.005478	brown	brown
THAP9-AS1	EXTL3.AS1	0.067107	brown	NA
THAP9-AS1	F8A1	0.002786	brown	brown
THAP9-AS1	FAF2	0.084667	brown	brown
THAP9-AS1	FAM111A.DT	0.021368	brown	NA
THAP9-AS1	FAM117B	0.048358	brown	brown
THAP9-AS1	FAM120AOS	0.02913	brown	brown
THAP9-AS1	FAM122A	0.004209	brown	brown
THAP9-AS1	FAM122B	0.03179	brown	brown
THAP9-AS1	FAM13A.AS1	0.181206	brown	NA
THAP9-AS1	FAM153CP	0.056392	brown	brown
THAP9-AS1	FAM160B2	0.053784	brown	brown
THAP9-AS1	FAM169A	0.093675	brown	brown
THAP9-AS1	FAM174B	0.022128	brown	brown
THAP9-AS1	FAM193B	0.05927	brown	brown
THAP9-AS1	FAM200A	0.013935	brown	brown
THAP9-AS1	FAM220A	0.003282	brown	brown
THAP9-AS1	FAM221A	0.138812	brown	brown
THAP9-AS1	FAM234B	0.014983	brown	brown
THAP9-AS1	FAM241B	0.002075	brown	brown
THAP9-AS1	FAM76B	0.053249	brown	brown
THAP9-AS1	FAM86C1P	0.004504	brown	brown
THAP9-AS1	FAM9B	0.010254	brown	brown
THAP9-AS1	FANCL	0.017543	brown	brown
THAP9-AS1	FARP1	0.017686	brown	brown
THAP9-AS1	FARP2	0.091365	brown	brown
THAP9-AS1	FASTKD3	0.014397	brown	brown
THAP9-AS1	FBP2	0.107938	brown	brown
THAP9-AS1	FBXL14	0.035312	brown	brown
THAP9-AS1	FBXL20	0.002603	brown	brown
THAP9-AS1	FBXL4	0.021825	brown	brown
THAP9-AS1	FBXO16	0.004555	brown	brown
THAP9-AS1	FBXO36	0.027178	brown	brown
THAP9-AS1	FBXO48	0.021396	brown	brown
THAP9-AS1	FBXW4	0.003476	brown	brown
THAP9-AS1	FDXACB1	0.042319	brown	brown
THAP9-AS1	FER1L5	0.070179	brown	brown
THAP9-AS1	FERMT1	0.068379	brown	brown
THAP9-AS1	FGF19	0.012021	brown	brown
THAP9-AS1	FHOD1	0.003169	brown	brown
THAP9-AS1	FIGNL1	0.000947	brown	brown
THAP9-AS1	FLJ20712	0.006674	brown	brown
THAP9-AS1	FLJ31356	0.003651	brown	brown
THAP9-AS1	FLNB	0.027025	brown	brown
THAP9-AS1	FLVCR1	0.018858	brown	brown
THAP9-AS1	FLYWCH1	0.012804	brown	brown
THAP9-AS1	FMO5	0.023776	brown	brown
THAP9-AS1	FN3K	0.006042	brown	brown
THAP9-AS1	FNBP1L	0.07784	brown	brown
THAP9-AS1	FNBP4	0.118455	brown	brown
THAP9-AS1	FNDC11	0.006205	brown	brown
THAP9-AS1	FNDC3B	0.00466	brown	brown
THAP9-AS1	FOLR1	0.009161	brown	brown
THAP9-AS1	FPGT	0.024756	brown	brown
THAP9-AS1	FRS3	0.00746	brown	brown
THAP9-AS1	FSD2	0.002335	brown	brown
THAP9-AS1	FSIP2.AS1	0.040009	brown	NA
THAP9-AS1	FSTL4	0.04837	brown	brown
THAP9-AS1	FUBP1	0.071138	brown	brown
THAP9-AS1	FUNDC1	0.015408	brown	brown
THAP9-AS1	FUT10	0.020721	brown	brown
THAP9-AS1	FZD2	0.002343	brown	brown
THAP9-AS1	GALC	0.014922	brown	brown
THAP9-AS1	GALNT11	0.046434	brown	brown
THAP9-AS1	GALNT2	0.026396	brown	brown
THAP9-AS1	GATA2	0.072101	brown	brown
THAP9-AS1	GATA3	0.021608	brown	brown
THAP9-AS1	GATAD1	0.020601	brown	brown
THAP9-AS1	GATB	0.005151	brown	brown
THAP9-AS1	GBP3	0.031955	brown	brown
THAP9-AS1	GCC2.AS1	0.01191	brown	NA
THAP9-AS1	GCNT1P3	0.026128	brown	brown
THAP9-AS1	GEMIN7.AS1	0.040176	brown	NA
THAP9-AS1	GGACT	0.007643	brown	brown
THAP9-AS1	GGT3P	0.005887	brown	brown
THAP9-AS1	GHET1	0.017189	brown	brown
THAP9-AS1	GIGYF1	0.01916	brown	brown
THAP9-AS1	GLCCI1	0.019001	brown	brown
THAP9-AS1	GLMP	0.012856	brown	brown
THAP9-AS1	GLT8D1	0.007189	brown	brown
THAP9-AS1	GLUD1P3	0.014777	brown	brown
THAP9-AS1	GMCL1	0.037757	brown	brown
THAP9-AS1	GMPR2	0.017345	brown	brown
THAP9-AS1	GNG3	0.004475	brown	brown
THAP9-AS1	GNS	0.005739	brown	brown
THAP9-AS1	GOLM2	0.006114	brown	brown
THAP9-AS1	GOLPH3L	0.064558	brown	brown
THAP9-AS1	GORAB	0.05218	brown	brown
THAP9-AS1	GPANK1	0.003091	brown	brown
THAP9-AS1	GPR199P	0.054758	brown	brown
THAP9-AS1	GRAMD2B	0.051505	brown	brown
THAP9-AS1	GRID2IP	0.035539	brown	brown
THAP9-AS1	GRK3	0.01919	brown	brown
THAP9-AS1	GRK4	0.001247	brown	brown
THAP9-AS1	GSAP	0.113235	brown	brown
THAP9-AS1	GSC2	0.021616	brown	brown
THAP9-AS1	GSTT2	0.056157	brown	brown
THAP9-AS1	GTF2E1	0.002371	brown	brown
THAP9-AS1	GTF2H3	0.067092	brown	brown
THAP9-AS1	GTF2H4	0.033017	brown	brown
THAP9-AS1	GTF2I	0.044841	brown	brown
THAP9-AS1	GTF2IP1	0.012363	brown	brown
THAP9-AS1	GTSE1.DT	0.001838	brown	NA
THAP9-AS1	GUCY2C	0.052762	brown	brown
THAP9-AS1	GXYLT1	0.054803	brown	brown
THAP9-AS1	HADHAP1	0.050131	brown	brown
THAP9-AS1	HAGLR	0.039003	brown	brown
THAP9-AS1	HARS2	0.015957	brown	brown
THAP9-AS1	HAUS3	0.011012	brown	brown
THAP9-AS1	HCAR1	0.035126	brown	brown
THAP9-AS1	HCFC1	0.009163	brown	brown
THAP9-AS1	HCN3	0.02036	brown	brown
THAP9-AS1	HDAC2.AS2	0.029718	brown	NA
THAP9-AS1	HECTD3	0.007996	brown	brown
THAP9-AS1	HEMK1	0.091168	brown	brown
THAP9-AS1	HERC4	0.114299	brown	brown
THAP9-AS1	HEXA	0.004161	brown	brown
THAP9-AS1	HFE	0.028622	brown	brown
THAP9-AS1	HGSNAT	0.029593	brown	brown
THAP9-AS1	HHAT	0.080373	brown	brown
THAP9-AS1	HID1	0.028927	brown	brown
THAP9-AS1	HINFP	0.004188	brown	brown
THAP9-AS1	HLCS	0.040178	brown	brown
THAP9-AS1	HM13.AS1	0.001834	brown	NA
THAP9-AS1	HMGCS2	0.011572	brown	brown
THAP9-AS1	HMGXB3	0.139729	brown	brown
THAP9-AS1	HNF1B	0.011532	brown	brown
THAP9-AS1	HNMT	0.027908	brown	brown
THAP9-AS1	HNRNPA1L2	0.02	brown	brown
THAP9-AS1	HNRNPH1	0.089008	brown	brown
THAP9-AS1	HNRNPMP1	0.012856	brown	brown
THAP9-AS1	HOXA11.AS	0.006139	brown	NA
THAP9-AS1	HOXA2	0.024575	brown	brown
THAP9-AS1	HOXA5	0.015582	brown	brown
THAP9-AS1	HOXB4	0.011721	brown	brown
THAP9-AS1	HPS3	0.007133	brown	brown
THAP9-AS1	HS2ST1	0.018637	brown	brown
THAP9-AS1	HS3ST6	0.013609	brown	brown
THAP9-AS1	HSF2BP	0.006444	brown	brown
THAP9-AS1	HTR7	0.068034	brown	brown
THAP9-AS1	HYI	0.021083	brown	brown
THAP9-AS1	HYKK	0.008096	brown	brown
THAP9-AS1	HYPK	0.189395	brown	brown
THAP9-AS1	IDH1	0.042169	brown	brown
THAP9-AS1	IFNAR1	0.005851	brown	brown
THAP9-AS1	IFNWP19	0.134869	brown	brown
THAP9-AS1	IFT140	0.074732	brown	brown
THAP9-AS1	IFT46	0.009964	brown	brown
THAP9-AS1	IFT52	0.003617	brown	brown
THAP9-AS1	IFT80	0.0336	brown	brown
THAP9-AS1	IGSF3	0.04782	brown	brown
THAP9-AS1	IKBKB	0.07012	brown	brown
THAP9-AS1	IL17RB	0.014043	brown	brown
THAP9-AS1	IL1RAPL2	0.067125	brown	brown
THAP9-AS1	IL7	0.045929	brown	brown
THAP9-AS1	ILF3	0.071983	brown	brown
THAP9-AS1	IMPG2	0.003898	brown	brown
THAP9-AS1	INE1	0.127087	brown	brown
THAP9-AS1	ING4	0.00181	brown	brown
THAP9-AS1	ING5	0.074286	brown	brown
THAP9-AS1	INIP	0.034494	brown	brown
THAP9-AS1	INSIG2	0.003469	brown	brown
THAP9-AS1	INTS2	0.001888	brown	brown
THAP9-AS1	INTS6L	0.182482	brown	brown
THAP9-AS1	IQCB1	0.05789	brown	brown
THAP9-AS1	IQCC	0.020197	brown	brown
THAP9-AS1	IQCH	0.131522	brown	brown
THAP9-AS1	IQCH.AS1	0.051522	brown	NA
THAP9-AS1	IQCK	0.039693	brown	brown
THAP9-AS1	IQCN	0.0469	brown	brown
THAP9-AS1	IQSEC2	0.057258	brown	brown
THAP9-AS1	IRAK4	0.015096	brown	brown
THAP9-AS1	IRF2	0.022214	brown	brown
THAP9-AS1	ITFG2	0.01989	brown	brown
THAP9-AS1	IVD	0.037442	brown	brown
THAP9-AS1	IYD	0.028542	brown	brown
THAP9-AS1	JHY	0.025972	brown	brown
THAP9-AS1	JKAMP	0.040686	brown	brown
THAP9-AS1	JMJD7.PLA2G4B	0.143683	brown	NA
THAP9-AS1	JRK	0.013386	brown	brown
THAP9-AS1	JRKL	0.033248	brown	brown
THAP9-AS1	KAT2A	0.108771	brown	brown
THAP9-AS1	KAT8	0.034894	brown	brown
THAP9-AS1	KBTBD3	0.002828	brown	brown
THAP9-AS1	KCNA7	0.006226	brown	brown
THAP9-AS1	KCNC3	0.08067	brown	brown
THAP9-AS1	KCNH4	0.052154	brown	brown
THAP9-AS1	KCNQ1	0.027738	brown	brown
THAP9-AS1	KDM4A	0.029334	brown	brown
THAP9-AS1	KHDC4	0.151266	brown	brown
THAP9-AS1	KIAA0753	0.047747	brown	brown
THAP9-AS1	KIAA0895L	0.168497	brown	brown
THAP9-AS1	KIF2A	0.028394	brown	brown
THAP9-AS1	KIF3B	0.003133	brown	brown
THAP9-AS1	KIF5C	0.018169	brown	brown
THAP9-AS1	KIFAP3	0.014367	brown	brown
THAP9-AS1	KIFC2	0.164567	brown	brown
THAP9-AS1	KIR3DL1	0.001867	brown	brown
THAP9-AS1	KLC4	0.003267	brown	brown
THAP9-AS1	KLF13	0.02648	brown	brown
THAP9-AS1	KLHDC7A	0.01124	brown	brown
THAP9-AS1	KLHL12	0.017553	brown	brown
THAP9-AS1	KLHL28	0.019183	brown	brown
THAP9-AS1	KLKP1	0.146773	brown	brown
THAP9-AS1	KLRC1	0.022942	brown	brown
THAP9-AS1	KLRD1	0.037443	brown	brown
THAP9-AS1	KLRK1	0.143898	brown	brown
THAP9-AS1	KNDC1	0.036975	brown	brown
THAP9-AS1	KNOP1	0.011724	brown	brown
THAP9-AS1	KRT18P39	0.068836	brown	brown
THAP9-AS1	KRT18P55	0.077992	brown	brown
THAP9-AS1	KRT39	0.03098	brown	brown
THAP9-AS1	KRTAP5.11	0.032109	brown	NA
THAP9-AS1	KRTAP5.7	0.060424	brown	NA
THAP9-AS1	KSR2	0.017729	brown	brown
THAP9-AS1	KTN1	0.060587	brown	brown
THAP9-AS1	KTN1.AS1	0.04465	brown	NA
THAP9-AS1	L3MBTL3	0.031313	brown	brown
THAP9-AS1	LARS2	0.011057	brown	brown
THAP9-AS1	LCA5	0.011	brown	brown
THAP9-AS1	LCE1E	0.013311	brown	brown
THAP9-AS1	LCLAT1	0.004012	brown	brown
THAP9-AS1	LCOR	0.103751	brown	brown
THAP9-AS1	LCORL	0.00168	brown	brown
THAP9-AS1	LCTL	0.012209	brown	brown
THAP9-AS1	LDAH	0.017911	brown	brown
THAP9-AS1	LDB1	0.022801	brown	brown
THAP9-AS1	LEKR1	0.025614	brown	brown
THAP9-AS1	LENG8	0.180568	brown	brown
THAP9-AS1	LGR4	0.018609	brown	brown
THAP9-AS1	LIMCH1	0.010784	brown	brown
THAP9-AS1	LIMD1	0.056783	brown	brown
THAP9-AS1	LIMS1.AS1	0.093275	brown	NA
THAP9-AS1	LINC00106	0.122656	brown	brown
THAP9-AS1	LINC00174	0.13982	brown	brown
THAP9-AS1	LINC00205	0.005198	brown	brown
THAP9-AS1	LINC00271	0.021693	brown	brown
THAP9-AS1	LINC00467	0.057913	brown	brown
THAP9-AS1	LINC00624	0.042031	brown	brown
THAP9-AS1	LINC00638	0.014667	brown	brown
THAP9-AS1	LINC00649	0.007874	brown	brown
THAP9-AS1	LINC00665	0.012086	brown	brown
THAP9-AS1	LINC00857	0.018886	brown	brown
THAP9-AS1	LINC00894	0.14156	brown	brown
THAP9-AS1	LINC00910	0.022874	brown	brown
THAP9-AS1	LINC00954	0.11588	brown	brown
THAP9-AS1	LINC01118	0.0278	brown	brown
THAP9-AS1	LINC01134	0.004442	brown	brown
THAP9-AS1	LINC01144	0.01614	brown	brown
THAP9-AS1	LINC01176	0.169632	brown	brown
THAP9-AS1	LINC01275	0.005478	brown	brown
THAP9-AS1	LINC01331	0.000833	brown	brown
THAP9-AS1	LINC01356	0.021375	brown	brown
THAP9-AS1	LINC01361	0.009598	brown	brown
THAP9-AS1	LINC01451	0.142344	brown	brown
THAP9-AS1	LINC01505	0.004664	brown	brown
THAP9-AS1	LINC01547	0.012236	brown	brown
THAP9-AS1	LINC01572	0.111394	brown	brown
THAP9-AS1	LINC01637	0.009542	brown	brown
THAP9-AS1	LINC01814	0.038457	brown	brown
THAP9-AS1	LINC02035	0.025418	brown	brown
THAP9-AS1	LINC02421	0.014648	brown	brown
THAP9-AS1	LINC02481	0.017697	brown	brown
THAP9-AS1	LINC02518	0.012544	brown	brown
THAP9-AS1	LINC02709	0.002782	brown	brown
THAP9-AS1	LINC02880	0.091204	brown	brown
THAP9-AS1	LINCR.0001	0.090513	brown	NA
THAP9-AS1	LIPT1	0.029332	brown	brown
THAP9-AS1	LLCFC1	0.001528	brown	brown
THAP9-AS1	LLPH.DT	0.003949	brown	NA
THAP9-AS1	LMLN	0.017513	brown	brown
THAP9-AS1	LMNTD2.AS1	0.094068	brown	NA
THAP9-AS1	LNPK	0.001547	brown	brown
THAP9-AS1	LOC100128770	0.115147	brown	brown
THAP9-AS1	LOC100129484	0.008192	brown	brown
THAP9-AS1	LOC100129534	0.039602	brown	brown
THAP9-AS1	LOC100130731	0.004859	brown	brown
THAP9-AS1	LOC100131465	0.105717	brown	brown
THAP9-AS1	LOC100132249	0.009257	brown	brown
THAP9-AS1	LOC100132686	0.097384	brown	brown
THAP9-AS1	LOC100133091	0.121108	brown	brown
THAP9-AS1	LOC100288846	0.029299	brown	brown
THAP9-AS1	LOC100379224	0.00274	brown	brown
THAP9-AS1	LOC100419831	0.09449	brown	brown
THAP9-AS1	LOC100420066	0.010506	brown	brown
THAP9-AS1	LOC100421100	0.005904	brown	brown
THAP9-AS1	LOC100421336	0.003323	brown	brown
THAP9-AS1	LOC100506258	0.051726	brown	brown
THAP9-AS1	LOC100506282	0.114949	brown	brown
THAP9-AS1	LOC100506497	0.006755	brown	brown
THAP9-AS1	LOC100507053	0.192899	brown	brown
THAP9-AS1	LOC100507334	0.008364	brown	brown
THAP9-AS1	LOC100507551	0.081037	brown	brown
THAP9-AS1	LOC100533629	0.005107	brown	brown
THAP9-AS1	LOC101926933	0.014183	brown	brown
THAP9-AS1	LOC101926977	0.00187	brown	brown
THAP9-AS1	LOC101927040	0.021801	brown	brown
THAP9-AS1	LOC101927468	0.010192	brown	brown
THAP9-AS1	LOC101927657	0.006739	brown	brown
THAP9-AS1	LOC101927911	0.037203	brown	brown
THAP9-AS1	LOC101928222	0.004229	brown	brown
THAP9-AS1	LOC101928295	0.001659	brown	brown
THAP9-AS1	LOC101928837	0.017228	brown	brown
THAP9-AS1	LOC101929709	0.030118	brown	brown
THAP9-AS1	LOC101929719	0.078387	brown	brown
THAP9-AS1	LOC101930370	0.008562	brown	brown
THAP9-AS1	LOC102546294	0.058929	brown	brown
THAP9-AS1	LOC102606465	0.007739	brown	brown
THAP9-AS1	LOC102723566	0.123094	brown	brown
THAP9-AS1	LOC102724330	0.003313	brown	brown
THAP9-AS1	LOC102724593	0.008686	brown	brown
THAP9-AS1	LOC102724814	0.215014	brown	brown
THAP9-AS1	LOC105371795	0.057139	brown	brown
THAP9-AS1	LOC105372352	0.013178	brown	brown
THAP9-AS1	LOC105372482	0.017708	brown	brown
THAP9-AS1	LOC105373159	0.034149	brown	brown
THAP9-AS1	LOC108783654	0.004727	brown	brown
THAP9-AS1	LOC112268269	0.125538	brown	brown
THAP9-AS1	LOC114841040	0.007682	brown	brown
THAP9-AS1	LOC153684	0.016135	brown	brown
THAP9-AS1	LOC155060	0.08979	brown	brown
THAP9-AS1	LOC257396	0.009169	brown	brown
THAP9-AS1	LOC283299	0.080872	brown	brown
THAP9-AS1	LOC283922	0.04281	brown	brown
THAP9-AS1	LOC340268	0.023908	brown	brown
THAP9-AS1	LOC389602	0.022797	brown	brown
THAP9-AS1	LOC401913	0.008641	brown	brown
THAP9-AS1	LOC441239	0.095228	brown	brown
THAP9-AS1	LOC442041	0.026893	brown	brown
THAP9-AS1	LOC442155	0.000818	brown	brown
THAP9-AS1	LOC442517	0.012794	brown	brown
THAP9-AS1	LOC643802	0.007413	brown	brown
THAP9-AS1	LOC648987	0.023602	brown	brown
THAP9-AS1	LOC651337	0.106702	brown	brown
THAP9-AS1	LOC654780	0.04466	brown	brown
THAP9-AS1	LOC728752	0.003256	brown	brown
THAP9-AS1	LOC729532	0.001526	brown	brown
THAP9-AS1	LPCAT2	0.021556	brown	brown
THAP9-AS1	LPCAT3	0.069499	brown	brown
THAP9-AS1	LPGAT1	0.042675	brown	brown
THAP9-AS1	LPP.AS2	0.013701	brown	NA
THAP9-AS1	LRBA	0.071753	brown	brown
THAP9-AS1	LRGUK	0.030995	brown	brown
THAP9-AS1	LRIG2	0.020227	brown	brown
THAP9-AS1	LRIT3	0.048464	brown	brown
THAP9-AS1	LRP5	0.022295	brown	brown
THAP9-AS1	LRP5L	0.137779	brown	brown
THAP9-AS1	LRRC14	0.024719	brown	brown
THAP9-AS1	LRRC27	0.015643	brown	brown
THAP9-AS1	LRRC29	0.020603	brown	brown
THAP9-AS1	LRRC37A	0.004636	brown	brown
THAP9-AS1	LRRC37A11P	0.000158	brown	brown
THAP9-AS1	LRRC37A3	0.007789	brown	brown
THAP9-AS1	LRRC37A5P	0.00426	brown	brown
THAP9-AS1	LRRC37B	0.015154	brown	brown
THAP9-AS1	LRRC39	0.046591	brown	brown
THAP9-AS1	LRRC49	0.019899	brown	brown
THAP9-AS1	LRRC57	0.013479	brown	brown
THAP9-AS1	LRRC6	0.006311	brown	brown
THAP9-AS1	LRRC63	0.034612	brown	brown
THAP9-AS1	LRRC8D	0.001116	brown	brown
THAP9-AS1	LRTOMT	0.021456	brown	brown
THAP9-AS1	LSM14B	0.005952	brown	brown
THAP9-AS1	LUC7L3	0.13696	brown	brown
THAP9-AS1	LUZP1	0.067585	brown	brown
THAP9-AS1	LYZL4	0.017454	brown	brown
THAP9-AS1	LZTS3	0.018805	brown	brown
THAP9-AS1	MACIR	0.003723	brown	brown
THAP9-AS1	MADD	0.04727	brown	brown
THAP9-AS1	MAG	0.000802	brown	brown
THAP9-AS1	MAGED1	0.002719	brown	brown
THAP9-AS1	MAGI1.IT1	0.100992	brown	NA
THAP9-AS1	MALAT1	0.053418	brown	brown
THAP9-AS1	MAN2C1	0.165956	brown	brown
THAP9-AS1	MANBA	0.007039	brown	brown
THAP9-AS1	MAOA	0.024805	brown	brown
THAP9-AS1	MAP3K1	0.00876	brown	brown
THAP9-AS1	MAP3K19	0.029376	brown	brown
THAP9-AS1	MAPK8IP3	0.217046	brown	brown
THAP9-AS1	MAPKAPK5	0.026673	brown	brown
THAP9-AS1	MAST3	0.002766	brown	brown
THAP9-AS1	MAT2B	0.035176	brown	brown
THAP9-AS1	MATN1.AS1	0.037799	brown	NA
THAP9-AS1	MAU2	0.044332	brown	brown
THAP9-AS1	MBOAT1	0.00415	brown	brown
THAP9-AS1	MBOAT7	0.034433	brown	brown
THAP9-AS1	MBP	0.072788	brown	brown
THAP9-AS1	MBTD1	0.036438	brown	brown
THAP9-AS1	MCCC1	0.096569	brown	brown
THAP9-AS1	MCCC2	0.062339	brown	brown
THAP9-AS1	MCF2	0.021931	brown	brown
THAP9-AS1	MCIDAS	0.020035	brown	brown
THAP9-AS1	MCM3	0.004278	brown	brown
THAP9-AS1	MCM3AP.AS1	0.101725	brown	NA
THAP9-AS1	MCM9	0.114383	brown	brown
THAP9-AS1	MCUR1	0.001288	brown	brown
THAP9-AS1	ME3	0.045965	brown	brown
THAP9-AS1	MECOM	0.11728	brown	brown
THAP9-AS1	MED29	0.004452	brown	brown
THAP9-AS1	MEP1A	0.024547	brown	brown
THAP9-AS1	MET	0.032463	brown	brown
THAP9-AS1	METTL27	0.01982	brown	brown
THAP9-AS1	METTL3	0.180217	brown	brown
THAP9-AS1	METTL6	0.028424	brown	brown
THAP9-AS1	MFAP3L	0.017434	brown	brown
THAP9-AS1	MFSD4B	0.033847	brown	brown
THAP9-AS1	MFSD6L	0.007115	brown	brown
THAP9-AS1	MFSD8	0.097793	brown	brown
THAP9-AS1	MFSD9	0.035778	brown	brown
THAP9-AS1	MGAT3	0.008112	brown	brown
THAP9-AS1	MGAT4A	0.018728	brown	brown
THAP9-AS1	MIEF1	0.042714	brown	brown
THAP9-AS1	MIEF2	0.016544	brown	brown
THAP9-AS1	MIER3	0.060404	brown	brown
THAP9-AS1	MIGA2	0.113758	brown	brown
THAP9-AS1	MINPP1	0.015819	brown	brown
THAP9-AS1	MIR181A2HG	0.026277	brown	brown
THAP9-AS1	MIR200A	0.164327	brown	brown
THAP9-AS1	MIR210	0.086526	brown	brown
THAP9-AS1	MIR3193	0.046595	brown	brown
THAP9-AS1	MIR3609	0.000127	brown	brown
THAP9-AS1	MIR3936	0.064941	brown	brown
THAP9-AS1	MIR3936HG	0.119067	brown	brown
THAP9-AS1	MIR4284	0.032912	brown	brown
THAP9-AS1	MIR429	0.162504	brown	brown
THAP9-AS1	MIR4653	0.067383	brown	brown
THAP9-AS1	MIR4706	0.004859	brown	brown
THAP9-AS1	MIR647	0.170719	brown	brown
THAP9-AS1	MIR659	0.021606	brown	brown
THAP9-AS1	MIR6784	0.13612	brown	brown
THAP9-AS1	MIR6814	0.007474	brown	brown
THAP9-AS1	MIR7849	0.006702	brown	brown
THAP9-AS1	MIR7854	0.061733	brown	brown
THAP9-AS1	MIRLET7D	0.12592	brown	brown
THAP9-AS1	MKLN1.AS	0.029036	brown	NA
THAP9-AS1	MKRN1	0.020823	brown	brown
THAP9-AS1	MKS1	0.019749	brown	brown
THAP9-AS1	MLLT3	0.014038	brown	brown
THAP9-AS1	MMACHC	0.006006	brown	brown
THAP9-AS1	MOCOS	0.033891	brown	brown
THAP9-AS1	MOGAT2	0.014807	brown	brown
THAP9-AS1	MON1B	0.044514	brown	brown
THAP9-AS1	MORN1	0.041716	brown	brown
THAP9-AS1	MORN4	0.013189	brown	brown
THAP9-AS1	MPI	0.016146	brown	brown
THAP9-AS1	MR1	0.072979	brown	brown
THAP9-AS1	MRE11	0.049812	brown	brown
THAP9-AS1	MRM2	0.012127	brown	brown
THAP9-AS1	MRNIP	0.070427	brown	brown
THAP9-AS1	MROH3P	0.074696	brown	brown
THAP9-AS1	MROH7	0.086851	brown	brown
THAP9-AS1	MROH7.TTC4	0.097355	brown	NA
THAP9-AS1	MSANTD2	0.09733	brown	brown
THAP9-AS1	MSI2	0.055011	brown	brown
THAP9-AS1	MSL2	0.007844	brown	brown
THAP9-AS1	MSL3P1	0.00177	brown	brown
THAP9-AS1	MSS51	0.024939	brown	brown
THAP9-AS1	MST1	0.173259	brown	brown
THAP9-AS1	MTATP6P26	0.003434	brown	brown
THAP9-AS1	MTCYBP23	0.005245	brown	brown
THAP9-AS1	MTCYBP28	0.001971	brown	brown
THAP9-AS1	MTERF1	0.048063	brown	brown
THAP9-AS1	MTFMT	0.032348	brown	brown
THAP9-AS1	MTMR3	0.022143	brown	brown
THAP9-AS1	MTMR4	0.005927	brown	brown
THAP9-AS1	MTRF1	0.073593	brown	brown
THAP9-AS1	MUS81	0.041563	brown	brown
THAP9-AS1	MVB12B	0.026419	brown	brown
THAP9-AS1	MXD4	0.003174	brown	brown
THAP9-AS1	MYBBP1A	0.108757	brown	brown
THAP9-AS1	MYO15B	0.144781	brown	brown
THAP9-AS1	MZF1	0.201673	brown	brown
THAP9-AS1	N4BP2L1	0.008434	brown	brown
THAP9-AS1	N6AMT1	0.057405	brown	brown
THAP9-AS1	NAALADL2	0.042905	brown	brown
THAP9-AS1	NADSYN1	0.089059	brown	brown
THAP9-AS1	NBEAP2	0.024746	brown	brown
THAP9-AS1	NBPF3	0.034487	brown	brown
THAP9-AS1	NBR1	0.009579	brown	brown
THAP9-AS1	NBR2	0.040969	brown	brown
THAP9-AS1	NCOA3	0.016895	brown	brown
THAP9-AS1	NCSTN	0.02828	brown	brown
THAP9-AS1	NDUFA3P4	0.015528	brown	brown
THAP9-AS1	NEAT1	0.133439	brown	brown
THAP9-AS1	NEIL1	0.090168	brown	brown
THAP9-AS1	NEK5	0.002224	brown	brown
THAP9-AS1	NEMP2	0.026543	brown	brown
THAP9-AS1	NEURL4	0.032293	brown	brown
THAP9-AS1	NFATC2IP	0.06595	brown	brown
THAP9-AS1	NFXL1	0.045037	brown	brown
THAP9-AS1	NFYA	0.057585	brown	brown
THAP9-AS1	NHLRC3	0.08247	brown	brown
THAP9-AS1	NHS.AS1	0.048758	brown	NA
THAP9-AS1	NIF3L1	0.021951	brown	brown
THAP9-AS1	NINJ2.AS1	0.001575	brown	NA
THAP9-AS1	NIPA1	0.008013	brown	brown
THAP9-AS1	NISCH	0.143788	brown	brown
THAP9-AS1	NKAPD1	0.004786	brown	brown
THAP9-AS1	NKTR	0.09224	brown	brown
THAP9-AS1	NLGN4X	0.021477	brown	brown
THAP9-AS1	NLK	0.016612	brown	brown
THAP9-AS1	NME6	0.003477	brown	brown
THAP9-AS1	NME7	0.002505	brown	brown
THAP9-AS1	NME9	0.020765	brown	brown
THAP9-AS1	NMNAT1	0.015696	brown	brown
THAP9-AS1	NMT1	0.047871	brown	brown
THAP9-AS1	NOA1	0.02318	brown	brown
THAP9-AS1	NOL4L	0.033516	brown	brown
THAP9-AS1	NORAD	0.014781	brown	brown
THAP9-AS1	NOXRED1	0.079342	brown	brown
THAP9-AS1	NPAP1	0.108834	brown	brown
THAP9-AS1	NPAS2	0.076806	brown	brown
THAP9-AS1	NPHP4	0.034772	brown	brown
THAP9-AS1	NR1H3	0.033954	brown	brown
THAP9-AS1	NR1I3	0.045067	brown	brown
THAP9-AS1	NR4A1	0.006714	brown	brown
THAP9-AS1	NR5A1	0.002876	brown	brown
THAP9-AS1	NRDE2	0.026386	brown	brown
THAP9-AS1	NSMCE3	0.005264	brown	brown
THAP9-AS1	NSUN3	0.026863	brown	brown
THAP9-AS1	NSUN7	0.052548	brown	brown
THAP9-AS1	NTN4	0.009804	brown	brown
THAP9-AS1	NUDT12	0.01175	brown	brown
THAP9-AS1	NUDT16L2P	0.028633	brown	brown
THAP9-AS1	NUDT6	0.004077	brown	brown
THAP9-AS1	NUP155	0.002888	brown	brown
THAP9-AS1	NUP42	0.034936	brown	brown
THAP9-AS1	NUTM1	0.022824	brown	brown
THAP9-AS1	NUTM2A	0.006866	brown	brown
THAP9-AS1	NUTM2D	0.010766	brown	brown
THAP9-AS1	NXF1	0.093662	brown	brown
THAP9-AS1	NYAP1	0.00249	brown	brown
THAP9-AS1	OBI1	0.002212	brown	brown
THAP9-AS1	OBSCN.AS1	0.100752	brown	NA
THAP9-AS1	ODR4	0.081398	brown	brown
THAP9-AS1	OGFR.AS1	0.076927	brown	NA
THAP9-AS1	OGT	0.183094	brown	brown
THAP9-AS1	OLMALINC	0.013734	brown	brown
THAP9-AS1	OPA3	0.052798	brown	brown
THAP9-AS1	OR10D1P	0.008118	brown	brown
THAP9-AS1	OR13A1	0.043582	brown	brown
THAP9-AS1	OR2A7	0.033938	brown	brown
THAP9-AS1	OR2W3	0.016874	brown	brown
THAP9-AS1	OR5M11	0.097935	brown	brown
THAP9-AS1	OR6E1P	4.99e-05	brown	brown
THAP9-AS1	OR7E108P	0.005861	brown	brown
THAP9-AS1	OR7E110P	0.002954	brown	brown
THAP9-AS1	ORC3	0.029289	brown	brown
THAP9-AS1	ORC4	0.010028	brown	brown
THAP9-AS1	OSBPL9	0.028463	brown	brown
THAP9-AS1	OSCP1	0.004516	brown	brown
THAP9-AS1	OSGEPL1	0.0093	brown	brown
THAP9-AS1	OSGIN2	0.003636	brown	brown
THAP9-AS1	OTULINL	0.015995	brown	brown
THAP9-AS1	OVCH2	0.10944	brown	brown
THAP9-AS1	OXR1	0.040876	brown	brown
THAP9-AS1	OXSM	0.009549	brown	brown
THAP9-AS1	P3H4	0.000405	brown	brown
THAP9-AS1	PAAF1	0.002218	brown	brown
THAP9-AS1	PABPC1L	0.146526	brown	brown
THAP9-AS1	PACRG.AS1	0.02014	brown	NA
THAP9-AS1	PAH	0.017019	brown	brown
THAP9-AS1	PALB2	0.012206	brown	brown
THAP9-AS1	PALM3	0.013212	brown	brown
THAP9-AS1	PAN2	0.200504	brown	brown
THAP9-AS1	PANK4	0.003881	brown	brown
THAP9-AS1	PAPOLG	0.007984	brown	brown
THAP9-AS1	PAQR7	0.030491	brown	brown
THAP9-AS1	PAQR8	0.030901	brown	brown
THAP9-AS1	PARD6B	0.051822	brown	brown
THAP9-AS1	PARP2	0.002189	brown	brown
THAP9-AS1	PARP4	0.127335	brown	brown
THAP9-AS1	PARP8	0.054862	brown	brown
THAP9-AS1	PARS2	0.004011	brown	brown
THAP9-AS1	PCBP4	0.009586	brown	brown
THAP9-AS1	PCGF3	0.09754	brown	brown
THAP9-AS1	PCMTD2	0.047295	brown	brown
THAP9-AS1	PCOLCE.AS1	0.030517	brown	NA
THAP9-AS1	PCP2	0.012112	brown	brown
THAP9-AS1	PCTP	0.007602	brown	brown
THAP9-AS1	PCYOX1L	0.026857	brown	brown
THAP9-AS1	PDCD7	0.00394	brown	brown
THAP9-AS1	PDE4A	0.017162	brown	brown
THAP9-AS1	PDE4DIP	0.000876	brown	brown
THAP9-AS1	PDE8A	0.061624	brown	brown
THAP9-AS1	PDIK1L	0.019666	brown	brown
THAP9-AS1	PDP1	0.021082	brown	brown
THAP9-AS1	PDP2	0.007858	brown	brown
THAP9-AS1	PDXDC2P.NPIPB14P	0.158692	brown	NA
THAP9-AS1	PEX10	0.027954	brown	brown
THAP9-AS1	PEX11B	0.015041	brown	brown
THAP9-AS1	PEX26	0.030148	brown	brown
THAP9-AS1	PFAS	0.036535	brown	brown
THAP9-AS1	PFKFB1	0.020759	brown	brown
THAP9-AS1	PGBD2	0.032846	brown	brown
THAP9-AS1	PGRMC1	0.008808	brown	brown
THAP9-AS1	PGS1	0.11527	brown	brown
THAP9-AS1	PHF12	0.011545	brown	brown
THAP9-AS1	PHF6	0.018713	brown	brown
THAP9-AS1	PHF8	0.075571	brown	brown
THAP9-AS1	PHKA2	0.063533	brown	brown
THAP9-AS1	PHLPP1	0.040384	brown	brown
THAP9-AS1	PHOSPHO2	0.005617	brown	brown
THAP9-AS1	PHTF1	0.010051	brown	brown
THAP9-AS1	PHTF2	0.016697	brown	brown
THAP9-AS1	PHYKPL	0.116161	brown	brown
THAP9-AS1	PI4KB	0.11736	brown	brown
THAP9-AS1	PIBF1	0.030343	brown	brown
THAP9-AS1	PIGB	0.04313	brown	brown
THAP9-AS1	PIGG	0.14355	brown	brown
THAP9-AS1	PIGH	0.075852	brown	brown
THAP9-AS1	PIGL	0.164227	brown	brown
THAP9-AS1	PIGV	0.016565	brown	brown
THAP9-AS1	PIGZ	0.020646	brown	brown
THAP9-AS1	PIK3R4	0.011799	brown	brown
THAP9-AS1	PIPSL	0.021882	brown	brown
THAP9-AS1	PITPNA.AS1	0.008134	brown	NA
THAP9-AS1	PKD1L1	0.013092	brown	brown
THAP9-AS1	PKD2L2	0.072222	brown	brown
THAP9-AS1	PKP4	0.024842	brown	brown
THAP9-AS1	PLA2G4B	0.145421	brown	brown
THAP9-AS1	PLA2G6	0.140084	brown	brown
THAP9-AS1	PLA2R1	0.008202	brown	brown
THAP9-AS1	PLBD1.AS1	0.090052	brown	NA
THAP9-AS1	PLCH1	0.039763	brown	brown
THAP9-AS1	PLEKHA6	0.09273	brown	brown
THAP9-AS1	PLEKHG4	0.039598	brown	brown
THAP9-AS1	PLEKHH1	0.117196	brown	brown
THAP9-AS1	PLK5	0.020555	brown	brown
THAP9-AS1	PLS1	0.039041	brown	brown
THAP9-AS1	PLSCR2	0.011522	brown	brown
THAP9-AS1	PLXNB1	0.105851	brown	brown
THAP9-AS1	PMAIP1	0.052986	brown	brown
THAP9-AS1	PMEL	0.013429	brown	brown
THAP9-AS1	PMFBP1	0.125483	brown	brown
THAP9-AS1	PMS2	0.013244	brown	brown
THAP9-AS1	PMS2CL	0.082915	brown	brown
THAP9-AS1	PMS2P3	0.141365	brown	brown
THAP9-AS1	PNPO	0.010525	brown	brown
THAP9-AS1	POC5	0.026736	brown	brown
THAP9-AS1	POFUT2	0.067676	brown	brown
THAP9-AS1	POGK	0.050453	brown	brown
THAP9-AS1	POGLUT1	0.018802	brown	brown
THAP9-AS1	POLG2	0.039747	brown	brown
THAP9-AS1	POLN	0.020935	brown	brown
THAP9-AS1	POMGNT1	0.109541	brown	brown
THAP9-AS1	POU2F1	0.007734	brown	brown
THAP9-AS1	POU4F3	0.009107	brown	brown
THAP9-AS1	POU5F1P3	0.09589	brown	brown
THAP9-AS1	PPCS	0.004534	brown	brown
THAP9-AS1	PPFIBP2	0.020931	brown	brown
THAP9-AS1	PPIAP30	0.015277	brown	brown
THAP9-AS1	PPIAP65	0.078061	brown	brown
THAP9-AS1	PPIEL	0.041176	brown	brown
THAP9-AS1	PPIL3	0.017266	brown	brown
THAP9-AS1	PPIL4	0.061054	brown	brown
THAP9-AS1	PPM1H	0.015669	brown	brown
THAP9-AS1	PPM1M	0.003566	brown	brown
THAP9-AS1	PPP1R26	0.039918	brown	brown
THAP9-AS1	PPP1R26.AS1	0.074104	brown	NA
THAP9-AS1	PPP1R32	0.057683	brown	brown
THAP9-AS1	PPP1R36	0.021774	brown	brown
THAP9-AS1	PPP1R8	0.009769	brown	brown
THAP9-AS1	PPP1R9A	0.005626	brown	brown
THAP9-AS1	PPP3CB.AS1	0.087394	brown	NA
THAP9-AS1	PPT2.EGFL8	0.186084	brown	NA
THAP9-AS1	PPWD1	0.058819	brown	brown
THAP9-AS1	PRDM15	0.017396	brown	brown
THAP9-AS1	PRDM2	0.05271	brown	brown
THAP9-AS1	PRIM1	0.001511	brown	brown
THAP9-AS1	PRIM2	0.001051	brown	brown
THAP9-AS1	PRKAR1AP1	0.0223	brown	brown
THAP9-AS1	PRKCZ.AS1	0.127098	brown	NA
THAP9-AS1	PRLH	0.001353	brown	brown
THAP9-AS1	PRMT6	0.02533	brown	brown
THAP9-AS1	PRORSD1P	0.005379	brown	brown
THAP9-AS1	PROSER3	0.065744	brown	brown
THAP9-AS1	PRR5.ARHGAP8	0.093051	brown	NA
THAP9-AS1	PRRC1	0.013294	brown	brown
THAP9-AS1	PRSS16	0.019039	brown	brown
THAP9-AS1	PRSS46P	0.039955	brown	brown
THAP9-AS1	PRUNE1	0.004915	brown	brown
THAP9-AS1	PRXL2B	0.002866	brown	brown
THAP9-AS1	PSAT1	0.012159	brown	brown
THAP9-AS1	PSMG4	0.007231	brown	brown
THAP9-AS1	PSPH	0.002246	brown	brown
THAP9-AS1	PTCD3	0.044312	brown	brown
THAP9-AS1	PTER	0.060549	brown	brown
THAP9-AS1	PTGDR	0.01017	brown	brown
THAP9-AS1	PTGER4P2.CDK2AP2P2	0.012044	brown	NA
THAP9-AS1	PTK2	0.064043	brown	brown
THAP9-AS1	PTP4A1	0.009812	brown	brown
THAP9-AS1	PTPN9	0.032308	brown	brown
THAP9-AS1	PTPRA	0.021531	brown	brown
THAP9-AS1	PTPRO	0.020634	brown	brown
THAP9-AS1	PTPRS	0.082569	brown	brown
THAP9-AS1	PTPRU	0.065382	brown	brown
THAP9-AS1	PUS10	0.074667	brown	brown
THAP9-AS1	PWAR1	0.051192	brown	brown
THAP9-AS1	PWRN1	0.190849	brown	brown
THAP9-AS1	PWWP3A	0.026513	brown	brown
THAP9-AS1	PXMP4	0.003107	brown	brown
THAP9-AS1	PXYLP1	0.004472	brown	brown
THAP9-AS1	PYGO2	0.005986	brown	brown
THAP9-AS1	PYROXD2	0.031018	brown	brown
THAP9-AS1	QRICH2	0.010857	brown	brown
THAP9-AS1	QSOX1	0.022534	brown	brown
THAP9-AS1	R3HCC1L	0.051965	brown	brown
THAP9-AS1	RAB15	0.044439	brown	brown
THAP9-AS1	RAB17	0.013444	brown	brown
THAP9-AS1	RAB19	0.042431	brown	brown
THAP9-AS1	RAB40C	0.034348	brown	brown
THAP9-AS1	RAB43	0.038641	brown	brown
THAP9-AS1	RABGAP1L	0.02548	brown	brown
THAP9-AS1	RABL2A	0.110864	brown	brown
THAP9-AS1	RABL2B	0.095231	brown	brown
THAP9-AS1	RAD17	0.012247	brown	brown
THAP9-AS1	RAI1	0.172684	brown	brown
THAP9-AS1	RALBP1	0.002403	brown	brown
THAP9-AS1	RALGPS1	0.092246	brown	brown
THAP9-AS1	RANBP17	0.02856	brown	brown
THAP9-AS1	RANBP6	0.036415	brown	brown
THAP9-AS1	RAPGEF4.AS1	0.004346	brown	NA
THAP9-AS1	RASA4B	0.045503	brown	brown
THAP9-AS1	RASSF6	0.123393	brown	brown
THAP9-AS1	RAVER1	0.025274	brown	brown
THAP9-AS1	RBAK.RBAKDN	0.00178	brown	NA
THAP9-AS1	RBBP4	0.021895	brown	brown
THAP9-AS1	RBBP8NL	0.018071	brown	brown
THAP9-AS1	RBBP9	0.004642	brown	brown
THAP9-AS1	RBM14.RBM4	0.083087	brown	NA
THAP9-AS1	RBM19	0.01901	brown	brown
THAP9-AS1	RBM25	0.119597	brown	brown
THAP9-AS1	RBM48	0.012601	brown	brown
THAP9-AS1	RBM4B	0.02512	brown	brown
THAP9-AS1	RDH14	0.000287	brown	brown
THAP9-AS1	RDM1P5	0.003952	brown	brown
THAP9-AS1	REEP6	0.028317	brown	brown
THAP9-AS1	REL	0.053485	brown	brown
THAP9-AS1	REPIN1	0.044547	brown	brown
THAP9-AS1	REPS2	0.026332	brown	brown
THAP9-AS1	RETREG2	0.02677	brown	brown
THAP9-AS1	RFESD	0.019029	brown	brown
THAP9-AS1	RFX3	0.06287	brown	brown
THAP9-AS1	RFX7	0.009148	brown	brown
THAP9-AS1	RGL3	0.055555	brown	brown
THAP9-AS1	RGMB.AS1	0.02719	brown	NA
THAP9-AS1	RGS17	0.00698	brown	brown
THAP9-AS1	RHNO1	0.005299	brown	brown
THAP9-AS1	RHOBTB3	0.054763	brown	brown
THAP9-AS1	RHPN1.AS1	0.007808	brown	NA
THAP9-AS1	RIBC1	0.00267	brown	brown
THAP9-AS1	RIC3	0.070996	brown	brown
THAP9-AS1	RIOX2	0.010868	brown	brown
THAP9-AS1	RMDN2	0.033733	brown	brown
THAP9-AS1	RN7SKP26	0.077658	brown	brown
THAP9-AS1	RN7SKP287	0.106437	brown	brown
THAP9-AS1	RN7SKP80	0.086833	brown	brown
THAP9-AS1	RN7SL192P	0.117177	brown	brown
THAP9-AS1	RN7SL23P	0.084285	brown	brown
THAP9-AS1	RN7SL353P	0.022668	brown	brown
THAP9-AS1	RN7SL556P	0.009945	brown	brown
THAP9-AS1	RN7SL566P	0.037909	brown	brown
THAP9-AS1	RN7SL834P	0.034108	brown	brown
THAP9-AS1	RNA5SP139	0.00373	brown	brown
THAP9-AS1	RNA5SP154	0.009029	brown	brown
THAP9-AS1	RNF125	0.008942	brown	brown
THAP9-AS1	RNF144A	0.002566	brown	brown
THAP9-AS1	RNF182	0.003126	brown	brown
THAP9-AS1	RNF2	0.042382	brown	brown
THAP9-AS1	RNF212B	0.087207	brown	brown
THAP9-AS1	RNF220	0.001584	brown	brown
THAP9-AS1	RNF24	0.020165	brown	brown
THAP9-AS1	RNF31	0.063424	brown	brown
THAP9-AS1	RNF44	0.050283	brown	brown
THAP9-AS1	RNF8	0.004666	brown	brown
THAP9-AS1	RNLS	0.018974	brown	brown
THAP9-AS1	RNPC3	0.083718	brown	brown
THAP9-AS1	RNU2.11P	0.032082	brown	NA
THAP9-AS1	RNU4ATAC18P	0.017096	brown	brown
THAP9-AS1	RNU6.101P	0.007186	brown	NA
THAP9-AS1	RNU6.1065P	0.034808	brown	NA
THAP9-AS1	RNU6.1238P	0.020185	brown	NA
THAP9-AS1	RNU6.1266P	0.011303	brown	NA
THAP9-AS1	RNU6.242P	0.010506	brown	NA
THAP9-AS1	RNU6.402P	0.029615	brown	NA
THAP9-AS1	RNU6.418P	0.102608	brown	NA
THAP9-AS1	RNU6.549P	0.010026	brown	NA
THAP9-AS1	RNU6.583P	0.00399	brown	NA
THAP9-AS1	RNU6.88P	0.001568	brown	NA
THAP9-AS1	RORC	0.047615	brown	brown
THAP9-AS1	RPA2	0.009777	brown	brown
THAP9-AS1	RPAP1	0.003843	brown	brown
THAP9-AS1	RPL17P6	0.064757	brown	brown
THAP9-AS1	RPL21P43	0.097312	brown	brown
THAP9-AS1	RPL21P95	0.011282	brown	brown
THAP9-AS1	RPL21P96	0.014772	brown	brown
THAP9-AS1	RPL31P34	0.009426	brown	brown
THAP9-AS1	RPL32P3	0.062099	brown	brown
THAP9-AS1	RPL34P4	0.035569	brown	brown
THAP9-AS1	RPL37AP9	0.037046	brown	brown
THAP9-AS1	RPL7L1P12	0.000724	brown	brown
THAP9-AS1	RPL9P11	0.071757	brown	brown
THAP9-AS1	RPLP0P11	0.003842	brown	brown
THAP9-AS1	RPP38.DT	0.034369	brown	NA
THAP9-AS1	RPS15AP31	0.003979	brown	brown
THAP9-AS1	RPS17P15	0.019672	brown	brown
THAP9-AS1	RPS24P10	0.090239	brown	brown
THAP9-AS1	RPS2P14	0.017847	brown	brown
THAP9-AS1	RPS3AP20	0.119855	brown	brown
THAP9-AS1	RPS3AP43	0.01037	brown	brown
THAP9-AS1	RPS6KA6	0.03989	brown	brown
THAP9-AS1	RPS7P7	0.000576	brown	brown
THAP9-AS1	RRS1.AS1	0.012558	brown	NA
THAP9-AS1	RSAD1	0.0057	brown	brown
THAP9-AS1	RSKR	0.140979	brown	brown
THAP9-AS1	RSPH1	0.010257	brown	brown
THAP9-AS1	RSPH4A	0.058047	brown	brown
THAP9-AS1	RSRP1	0.178928	brown	brown
THAP9-AS1	RTL10	0.011855	brown	brown
THAP9-AS1	RUNDC1	0.036306	brown	brown
THAP9-AS1	RUSC1.AS1	0.111977	brown	NA
THAP9-AS1	RUSF1	0.100882	brown	brown
THAP9-AS1	RXRA	0.028618	brown	brown
THAP9-AS1	SAMD12	0.033803	brown	brown
THAP9-AS1	SAMD15	0.011774	brown	brown
THAP9-AS1	SAPCD1	0.024728	brown	brown
THAP9-AS1	SART3	0.06855	brown	brown
THAP9-AS1	SCAMP1.AS1	0.00686	brown	NA
THAP9-AS1	SCAP	0.034999	brown	brown
THAP9-AS1	SCARB2	0.01764	brown	brown
THAP9-AS1	SCARNA9	0.033787	brown	brown
THAP9-AS1	SCCPDH	0.01547	brown	brown
THAP9-AS1	SCLY	0.024207	brown	brown
THAP9-AS1	SCO1	0.029653	brown	brown
THAP9-AS1	SCUBE2	0.017958	brown	brown
THAP9-AS1	SDCCAG8	0.045111	brown	brown
THAP9-AS1	SDHAF4	0.036165	brown	brown
THAP9-AS1	SDHAP1	0.126924	brown	brown
THAP9-AS1	SDR39U1	0.091118	brown	brown
THAP9-AS1	SDR42E1	0.049705	brown	brown
THAP9-AS1	SEC24B.AS1	0.025899	brown	NA
THAP9-AS1	SEMA4G	0.053864	brown	brown
THAP9-AS1	SEMA5A	0.03667	brown	brown
THAP9-AS1	SEPSECS	0.006438	brown	brown
THAP9-AS1	SEPTIN4.AS1	0.030156	brown	NA
THAP9-AS1	SEPTIN7P14	0.149553	brown	brown
THAP9-AS1	SEPTIN8	0.097765	brown	brown
THAP9-AS1	SERHL2	0.054873	brown	brown
THAP9-AS1	SERP2	0.001569	brown	brown
THAP9-AS1	SESN3	0.028706	brown	brown
THAP9-AS1	SETD1A	0.013708	brown	brown
THAP9-AS1	SETD4	0.119299	brown	brown
THAP9-AS1	SEZ6L	0.010955	brown	brown
THAP9-AS1	SFXN2	0.036781	brown	brown
THAP9-AS1	SFXN5	0.026767	brown	brown
THAP9-AS1	SGPL1	0.076339	brown	brown
THAP9-AS1	SGSH	0.019367	brown	brown
THAP9-AS1	SGSM2	0.093876	brown	brown
THAP9-AS1	SH2B1	0.028096	brown	brown
THAP9-AS1	SH2D4A	0.029002	brown	brown
THAP9-AS1	SH3BP2	0.064361	brown	brown
THAP9-AS1	SH3BP5.AS1	0.110454	brown	NA
THAP9-AS1	SH3RF1	0.057702	brown	brown
THAP9-AS1	SH3TC2	0.036369	brown	brown
THAP9-AS1	SHROOM1	0.028428	brown	brown
THAP9-AS1	SHTN1	0.022432	brown	brown
THAP9-AS1	SIDT1	0.106103	brown	brown
THAP9-AS1	SIGLEC15	0.019288	brown	brown
THAP9-AS1	SIKE1	0.002141	brown	brown
THAP9-AS1	SIPA1L3	0.102176	brown	brown
THAP9-AS1	SIRT5	0.048395	brown	brown
THAP9-AS1	SIX4	0.024583	brown	brown
THAP9-AS1	SKAP2	0.012143	brown	brown
THAP9-AS1	SKP2	0.008271	brown	brown
THAP9-AS1	SLC16A5	0.015189	brown	brown
THAP9-AS1	SLC16A8	0.137261	brown	brown
THAP9-AS1	SLC17A5	0.084416	brown	brown
THAP9-AS1	SLC23A2	0.03008	brown	brown
THAP9-AS1	SLC23A3	0.20846	brown	brown
THAP9-AS1	SLC24A1	0.063223	brown	brown
THAP9-AS1	SLC25A15	0.006327	brown	brown
THAP9-AS1	SLC25A29	0.080816	brown	brown
THAP9-AS1	SLC25A35	0.021838	brown	brown
THAP9-AS1	SLC25A42	0.015133	brown	brown
THAP9-AS1	SLC26A1	0.149652	brown	brown
THAP9-AS1	SLC26A11	0.023698	brown	brown
THAP9-AS1	SLC26A7	0.045277	brown	brown
THAP9-AS1	SLC29A3	0.024144	brown	brown
THAP9-AS1	SLC2A10	0.049384	brown	brown
THAP9-AS1	SLC30A6	0.022472	brown	brown
THAP9-AS1	SLC35A1	0.021201	brown	brown
THAP9-AS1	SLC35B3	0.01421	brown	brown
THAP9-AS1	SLC35D1	0.056434	brown	brown
THAP9-AS1	SLC35E1	0.034986	brown	brown
THAP9-AS1	SLC35E3	0.07106	brown	brown
THAP9-AS1	SLC36A1	0.028024	brown	brown
THAP9-AS1	SLC38A1	0.042848	brown	brown
THAP9-AS1	SLC38A6	0.01599	brown	brown
THAP9-AS1	SLC38A7	0.001979	brown	brown
THAP9-AS1	SLC38A9	0.014397	brown	brown
THAP9-AS1	SLC39A10	0.009335	brown	brown
THAP9-AS1	SLC39A13	0.004889	brown	brown
THAP9-AS1	SLC39A6	0.034126	brown	brown
THAP9-AS1	SLC41A3	0.013905	brown	brown
THAP9-AS1	SLC44A3.AS1	0.058263	brown	NA
THAP9-AS1	SLC48A1	0.000441	brown	brown
THAP9-AS1	SLC4A4	0.005154	brown	brown
THAP9-AS1	SLC52A3	0.05479	brown	brown
THAP9-AS1	SLC5A11	0.061051	brown	brown
THAP9-AS1	SLC7A13	0.016999	brown	brown
THAP9-AS1	SLC7A6OS	0.017397	brown	brown
THAP9-AS1	SLC9A8	0.054402	brown	brown
THAP9-AS1	SLF1	0.002004	brown	brown
THAP9-AS1	SLFN12	0.012441	brown	brown
THAP9-AS1	SLU7	0.019302	brown	brown
THAP9-AS1	SLX1B.SULT1A4	0.010806	brown	NA
THAP9-AS1	SLX4IP	0.035648	brown	brown
THAP9-AS1	SMARCAL1	0.005089	brown	brown
THAP9-AS1	SMC5	0.09232	brown	brown
THAP9-AS1	SMIM14	0.038983	brown	brown
THAP9-AS1	SMIM20	0.001168	brown	brown
THAP9-AS1	SMIM30	0.01283	brown	brown
THAP9-AS1	SMPD4BP	0.164618	brown	brown
THAP9-AS1	SMYD2	0.042595	brown	brown
THAP9-AS1	SNORA22	0.008472	brown	brown
THAP9-AS1	SNORA26	0.132086	brown	brown
THAP9-AS1	SNORA5A	0.022462	brown	brown
THAP9-AS1	SNORD19C	0.113554	brown	brown
THAP9-AS1	SNORD37	0.050481	brown	brown
THAP9-AS1	SNORD89	0.142996	brown	brown
THAP9-AS1	SNUPN	0.002154	brown	brown
THAP9-AS1	SNX14	0.076769	brown	brown
THAP9-AS1	SNX15	0.048061	brown	brown
THAP9-AS1	SNX31	0.017578	brown	brown
THAP9-AS1	SORL1	0.056278	brown	brown
THAP9-AS1	SOWAHCP5	0.029615	brown	brown
THAP9-AS1	SOX2.OT	0.012521	brown	NA
THAP9-AS1	SPAG1	0.079652	brown	brown
THAP9-AS1	SPAG16	0.052973	brown	brown
THAP9-AS1	SPATA20	0.036111	brown	brown
THAP9-AS1	SPEN	0.05545	brown	brown
THAP9-AS1	SPG11	0.081947	brown	brown
THAP9-AS1	SPHK2	0.015953	brown	brown
THAP9-AS1	SPICE1	0.03091	brown	brown
THAP9-AS1	SPTBN5	0.123364	brown	brown
THAP9-AS1	SPTY2D1OS	0.005503	brown	brown
THAP9-AS1	SRGAP2	0.01429	brown	brown
THAP9-AS1	SRGAP2.AS1	8.32e-06	brown	NA
THAP9-AS1	SRGAP3	0.055542	brown	brown
THAP9-AS1	SRMS	0.020693	brown	brown
THAP9-AS1	SRP68P2	0.072377	brown	brown
THAP9-AS1	SRSF11	0.15	brown	brown
THAP9-AS1	SRSF5	0.09313	brown	brown
THAP9-AS1	SRSF8	0.022781	brown	brown
THAP9-AS1	SS18L1	0.085576	brown	brown
THAP9-AS1	SSH3	0.035406	brown	brown
THAP9-AS1	SSR1	0.002491	brown	brown
THAP9-AS1	SSTR5	0.014677	brown	brown
THAP9-AS1	ST3GAL5	0.032748	brown	brown
THAP9-AS1	STAG3L5P	0.105414	brown	brown
THAP9-AS1	STARD3NL	0.002967	brown	brown
THAP9-AS1	STIMATE	0.031759	brown	brown
THAP9-AS1	STIMATE.MUSTN1	0.16968	brown	NA
THAP9-AS1	STK32A	0.043762	brown	brown
THAP9-AS1	STK38	0.006039	brown	brown
THAP9-AS1	STK4	0.016919	brown	brown
THAP9-AS1	STK4.AS1	0.005066	brown	NA
THAP9-AS1	STT3B	0.027801	brown	brown
THAP9-AS1	STX18.AS1	0.012758	brown	NA
THAP9-AS1	SUCO	0.048644	brown	brown
THAP9-AS1	SUFU	0.022744	brown	brown
THAP9-AS1	SUGP2	0.115232	brown	brown
THAP9-AS1	SULT1C2	0.009901	brown	brown
THAP9-AS1	SUMO2P19	0.056974	brown	brown
THAP9-AS1	SUPT20H	0.02752	brown	brown
THAP9-AS1	SUPT3H	0.002152	brown	brown
THAP9-AS1	SUPT7L	0.070939	brown	brown
THAP9-AS1	SUSD2	0.002287	brown	brown
THAP9-AS1	SWAP70	0.012648	brown	brown
THAP9-AS1	SYCP2	0.00599	brown	brown
THAP9-AS1	SYNGR1	0.070332	brown	brown
THAP9-AS1	SYNRG	0.070597	brown	brown
THAP9-AS1	SYT6	0.016542	brown	brown
THAP9-AS1	SYTL2	0.187236	brown	brown
THAP9-AS1	TADA1	0.006858	brown	brown
THAP9-AS1	TADA2B	0.013425	brown	brown
THAP9-AS1	TAF1A	0.024911	brown	brown
THAP9-AS1	TAF8	0.042862	brown	brown
THAP9-AS1	TAMM41	0.031396	brown	brown
THAP9-AS1	TANC2	0.02944	brown	brown
THAP9-AS1	TANGO2	0.002771	brown	brown
THAP9-AS1	TAOK2	0.009807	brown	brown
THAP9-AS1	TARBP1	0.025748	brown	brown
THAP9-AS1	TAS2R4	0.025547	brown	brown
THAP9-AS1	TAT	0.035288	brown	brown
THAP9-AS1	TBC1D17	0.003497	brown	brown
THAP9-AS1	TBC1D20	0.029133	brown	brown
THAP9-AS1	TBC1D22A.AS1	0.02139	brown	NA
THAP9-AS1	TBC1D30	0.08368	brown	brown
THAP9-AS1	TBC1D32	0.141821	brown	brown
THAP9-AS1	TBC1D4	0.057623	brown	brown
THAP9-AS1	TBC1D8	0.106391	brown	brown
THAP9-AS1	TBC1D8.AS1	0.024304	brown	NA
THAP9-AS1	TBC1D8B	0.015435	brown	brown
THAP9-AS1	TBP	0.062057	brown	brown
THAP9-AS1	TBPL1	0.004416	brown	brown
THAP9-AS1	TBX10	0.003212	brown	brown
THAP9-AS1	TBX19	0.003535	brown	brown
THAP9-AS1	TBX2	0.006743	brown	brown
THAP9-AS1	TCERG1	0.108964	brown	brown
THAP9-AS1	TCTN2	0.010224	brown	brown
THAP9-AS1	TCTN3	0.068997	brown	brown
THAP9-AS1	TDRP	0.050362	brown	brown
THAP9-AS1	TEF	0.003347	brown	brown
THAP9-AS1	TEP1	0.092315	brown	brown
THAP9-AS1	TEX261	0.00908	brown	brown
THAP9-AS1	TEX9	0.003641	brown	brown
THAP9-AS1	TFAP4	0.00228	brown	brown
THAP9-AS1	TFCP2	0.040158	brown	brown
THAP9-AS1	TFGP1	8.77e-05	brown	brown
THAP9-AS1	TGS1	0.071207	brown	brown
THAP9-AS1	THAP10	0.009344	brown	brown
THAP9-AS1	THAP9.AS1	1	brown	NA
THAP9-AS1	THBS4.AS1	0.004607	brown	NA
THAP9-AS1	THEM4	0.020403	brown	brown
THAP9-AS1	THNSL1	0.037717	brown	brown
THAP9-AS1	THRA1.BTR	0.014697	brown	NA
THAP9-AS1	THUMPD2	0.094254	brown	brown
THAP9-AS1	THUMPD3	0.024606	brown	brown
THAP9-AS1	THUMPD3.AS1	0.099441	brown	NA
THAP9-AS1	TIA1	0.088367	brown	brown
THAP9-AS1	TIGD1	0.045112	brown	brown
THAP9-AS1	TIGD2	0.023356	brown	brown
THAP9-AS1	TIGD6	0.022679	brown	brown
THAP9-AS1	TJAP1	0.03139	brown	brown
THAP9-AS1	TK2	0.011235	brown	brown
THAP9-AS1	TLE2	0.002427	brown	brown
THAP9-AS1	TM2D1	0.026378	brown	brown
THAP9-AS1	TMCO4	0.049012	brown	brown
THAP9-AS1	TMED10	0.018623	brown	brown
THAP9-AS1	TMED4	0.034836	brown	brown
THAP9-AS1	TMED6	0.01836	brown	brown
THAP9-AS1	TMED7.TICAM2	0.009846	brown	NA
THAP9-AS1	TMEM106A	0.011802	brown	brown
THAP9-AS1	TMEM116	0.035585	brown	brown
THAP9-AS1	TMEM123	0.020928	brown	brown
THAP9-AS1	TMEM128	0.036134	brown	brown
THAP9-AS1	TMEM129	0.006755	brown	brown
THAP9-AS1	TMEM144	0.081814	brown	brown
THAP9-AS1	TMEM147.AS1	0.098147	brown	NA
THAP9-AS1	TMEM150A	0.00563	brown	brown
THAP9-AS1	TMEM161B.AS1	0.031532	brown	NA
THAP9-AS1	TMEM168	0.03328	brown	brown
THAP9-AS1	TMEM17	0.001416	brown	brown
THAP9-AS1	TMEM177	0.005843	brown	brown
THAP9-AS1	TMEM178A	0.034592	brown	brown
THAP9-AS1	TMEM178B	0.008052	brown	brown
THAP9-AS1	TMEM182	0.050988	brown	brown
THAP9-AS1	TMEM184C	0.016212	brown	brown
THAP9-AS1	TMEM185A	0.060876	brown	brown
THAP9-AS1	TMEM192	0.013628	brown	brown
THAP9-AS1	TMEM198B	0.17625	brown	brown
THAP9-AS1	TMEM209	0.026514	brown	brown
THAP9-AS1	TMEM229B	0.038233	brown	brown
THAP9-AS1	TMEM241	0.003693	brown	brown
THAP9-AS1	TMEM25	0.000976	brown	brown
THAP9-AS1	TMEM260	0.059068	brown	brown
THAP9-AS1	TMEM262	0.129655	brown	brown
THAP9-AS1	TMEM267	0.009214	brown	brown
THAP9-AS1	TMEM35B	0.013026	brown	brown
THAP9-AS1	TMEM51.AS1	0.147409	brown	NA
THAP9-AS1	TMEM63A	0.169351	brown	brown
THAP9-AS1	TMEM68	0.068725	brown	brown
THAP9-AS1	TMEM69	0.014383	brown	brown
THAP9-AS1	TMEM80	0.010824	brown	brown
THAP9-AS1	TMEM92.AS1	0.10873	brown	NA
THAP9-AS1	TMEM97P1	0.006531	brown	brown
THAP9-AS1	TMEM9B.AS1	0.087013	brown	NA
THAP9-AS1	TMPPE	0.007263	brown	brown
THAP9-AS1	TMPRSS11CP	0.051567	brown	brown
THAP9-AS1	TMPRSS2	0.019434	brown	brown
THAP9-AS1	TMPRSS9	0.09885	brown	brown
THAP9-AS1	TMTC4	0.015418	brown	brown
THAP9-AS1	TNFRSF11A	0.010218	brown	brown
THAP9-AS1	TNFSF13	0.058879	brown	brown
THAP9-AS1	TOM1L1	0.023083	brown	brown
THAP9-AS1	TP53INP1	0.002911	brown	brown
THAP9-AS1	TPCN1	0.179136	brown	brown
THAP9-AS1	TPPP2	0.012707	brown	brown
THAP9-AS1	TRAK1	0.020377	brown	brown
THAP9-AS1	TREM2	0.011579	brown	brown
THAP9-AS1	TRGC1	0.016893	brown	brown
THAP9-AS1	TRIM25	0.015847	brown	brown
THAP9-AS1	TRIM31.AS1	0.080966	brown	NA
THAP9-AS1	TRIM32	0.022974	brown	brown
THAP9-AS1	TRIM45	0.013852	brown	brown
THAP9-AS1	TRIM56	0.051126	brown	brown
THAP9-AS1	TRIM65	0.000732	brown	brown
THAP9-AS1	TRIM74	0.118856	brown	brown
THAP9-AS1	TRIQK	0.012828	brown	brown
THAP9-AS1	TRIT1	0.063182	brown	brown
THAP9-AS1	TRMT11	0.052466	brown	brown
THAP9-AS1	TRMT13	0.103026	brown	brown
THAP9-AS1	TRMT5	0.009784	brown	brown
THAP9-AS1	TRMT61B	0.02345	brown	brown
THAP9-AS1	TRMT9B	0.123671	brown	brown
THAP9-AS1	TSEN2	0.027429	brown	brown
THAP9-AS1	TSGA10	0.128628	brown	brown
THAP9-AS1	TSGA10IP	0.020176	brown	brown
THAP9-AS1	TSNARE1	0.021145	brown	brown
THAP9-AS1	TSPAN15	0.00735	brown	brown
THAP9-AS1	TTC14	0.1083	brown	brown
THAP9-AS1	TTC17	0.090111	brown	brown
THAP9-AS1	TTC26	0.002524	brown	brown
THAP9-AS1	TTC3.AS1	0.001009	brown	NA
THAP9-AS1	TTC31	0.037115	brown	brown
THAP9-AS1	TTC38	0.009361	brown	brown
THAP9-AS1	TTC5	0.019867	brown	brown
THAP9-AS1	TTC6	0.110612	brown	brown
THAP9-AS1	TTC9C	0.016347	brown	brown
THAP9-AS1	TTF2	0.008405	brown	brown
THAP9-AS1	TTI1	0.01088	brown	brown
THAP9-AS1	TTLL1	0.006985	brown	brown
THAP9-AS1	TTLL3	0.174231	brown	brown
THAP9-AS1	TTN.AS1	0.078155	brown	NA
THAP9-AS1	TUBB8P1	0.082114	brown	brown
THAP9-AS1	TUBGCP4	0.00865	brown	brown
THAP9-AS1	TUBGCP6	0.195265	brown	brown
THAP9-AS1	TUG1	0.022394	brown	brown
THAP9-AS1	TYW5	0.095655	brown	brown
THAP9-AS1	UBAC2.AS1	0.020672	brown	NA
THAP9-AS1	UBASH3B	0.066178	brown	brown
THAP9-AS1	UBE2FP3	0.128674	brown	brown
THAP9-AS1	UBE2O	0.012487	brown	brown
THAP9-AS1	UBFD1	0.003089	brown	brown
THAP9-AS1	UBOX5.AS1	0.136459	brown	NA
THAP9-AS1	UBQLNL	0.032713	brown	brown
THAP9-AS1	UBTF	0.009667	brown	brown
THAP9-AS1	UCP3	0.024554	brown	brown
THAP9-AS1	UGGT1	0.00358	brown	brown
THAP9-AS1	UGT1A6	0.083443	brown	brown
THAP9-AS1	UHMK1	0.042756	brown	brown
THAP9-AS1	UHRF1BP1	0.015464	brown	brown
THAP9-AS1	UMAD1	0.017995	brown	brown
THAP9-AS1	UNC50	0.037044	brown	brown
THAP9-AS1	UNC79	0.010582	brown	brown
THAP9-AS1	UNK	0.040532	brown	brown
THAP9-AS1	UPK1A	0.042337	brown	brown
THAP9-AS1	UPK2	0.029081	brown	brown
THAP9-AS1	UQCC1	0.028397	brown	brown
THAP9-AS1	USB1	0.001484	brown	brown
THAP9-AS1	USP21	0.019558	brown	brown
THAP9-AS1	USP3	0.053466	brown	brown
THAP9-AS1	USP30	0.009862	brown	brown
THAP9-AS1	USP40	0.107111	brown	brown
THAP9-AS1	USP46	0.042122	brown	brown
THAP9-AS1	USPL1	0.069677	brown	brown
THAP9-AS1	UTP25	0.020087	brown	brown
THAP9-AS1	UXS1	0.042515	brown	brown
THAP9-AS1	VANGL1	0.017576	brown	brown
THAP9-AS1	VAV3	0.014523	brown	brown
THAP9-AS1	VEPH1	0.026172	brown	brown
THAP9-AS1	VGLL1	0.011405	brown	brown
THAP9-AS1	VHL	0.080793	brown	brown
THAP9-AS1	VIPR1	0.089487	brown	brown
THAP9-AS1	VMA21	0.012062	brown	brown
THAP9-AS1	VPS11	0.004277	brown	brown
THAP9-AS1	VPS18	0.003481	brown	brown
THAP9-AS1	VPS33A	0.0053	brown	brown
THAP9-AS1	VWA2	0.019693	brown	brown
THAP9-AS1	VWA3B	0.012031	brown	brown
THAP9-AS1	VWC2L	0.029466	brown	brown
THAP9-AS1	WARS2	0.038296	brown	brown
THAP9-AS1	WARS2.AS1	0.028051	brown	NA
THAP9-AS1	WASH8P	0.006977	brown	brown
THAP9-AS1	WBP1	0.075492	brown	brown
THAP9-AS1	WDR27	0.112861	brown	brown
THAP9-AS1	WDR48	0.011215	brown	brown
THAP9-AS1	WDR73	0.109039	brown	brown
THAP9-AS1	WDR89	0.006699	brown	brown
THAP9-AS1	WDR90	0.142449	brown	brown
THAP9-AS1	WDSUB1	0.037976	brown	brown
THAP9-AS1	WEE2.AS1	0.00674	brown	NA
THAP9-AS1	WFDC13	0.006913	brown	brown
THAP9-AS1	WFIKKN1	0.100864	brown	brown
THAP9-AS1	WIPF2	0.025524	brown	brown
THAP9-AS1	WNT5A	0.007278	brown	brown
THAP9-AS1	WSB1	0.080183	brown	brown
THAP9-AS1	XCL2	0.015826	brown	brown
THAP9-AS1	XKR8	0.003582	brown	brown
THAP9-AS1	XKR9	0.034467	brown	brown
THAP9-AS1	XPC	0.040996	brown	brown
THAP9-AS1	XPNPEP3	0.036667	brown	brown
THAP9-AS1	XPO1	0.002704	brown	brown
THAP9-AS1	XPR1	0.034467	brown	brown
THAP9-AS1	XYLB	0.009465	brown	brown
THAP9-AS1	XYLT2	0.008336	brown	brown
THAP9-AS1	YAE1	0.001439	brown	brown
THAP9-AS1	YJEFN3	0.172014	brown	brown
THAP9-AS1	ZADH2	0.039553	brown	brown
THAP9-AS1	ZBED5	0.10021	brown	brown
THAP9-AS1	ZBED9	0.0353	brown	brown
THAP9-AS1	ZBTB1	0.069388	brown	brown
THAP9-AS1	ZBTB22	0.028504	brown	brown
THAP9-AS1	ZBTB24	0.010465	brown	brown
THAP9-AS1	ZBTB33	0.033928	brown	brown
THAP9-AS1	ZBTB39	0.004285	brown	brown
THAP9-AS1	ZBTB44	0.039925	brown	brown
THAP9-AS1	ZBTB6	0.007278	brown	brown
THAP9-AS1	ZBTB8B	0.008457	brown	brown
THAP9-AS1	ZCCHC7	0.005095	brown	brown
THAP9-AS1	ZCCHC9	0.003636	brown	brown
THAP9-AS1	ZDHHC4	0.002543	brown	brown
THAP9-AS1	ZDHHC7	0.014522	brown	brown
THAP9-AS1	ZDHHC8	0.113717	brown	brown
THAP9-AS1	ZFAND2A.DT	0.003544	brown	NA
THAP9-AS1	ZFP41	0.039589	brown	brown
THAP9-AS1	ZFP62	0.015809	brown	brown
THAP9-AS1	ZFP64	0.005048	brown	brown
THAP9-AS1	ZKSCAN5	0.008316	brown	brown
THAP9-AS1	ZMYM2	0.078812	brown	brown
THAP9-AS1	ZMYND12	0.022413	brown	brown
THAP9-AS1	ZMYND8	0.028251	brown	brown
THAP9-AS1	ZNF10	0.082867	brown	brown
THAP9-AS1	ZNF100	0.03008	brown	brown
THAP9-AS1	ZNF12	0.030659	brown	brown
THAP9-AS1	ZNF133	0.011565	brown	brown
THAP9-AS1	ZNF134	0.036334	brown	brown
THAP9-AS1	ZNF136	0.043955	brown	brown
THAP9-AS1	ZNF138	0.037293	brown	brown
THAP9-AS1	ZNF140	0.055324	brown	brown
THAP9-AS1	ZNF155	0.035862	brown	brown
THAP9-AS1	ZNF16	0.005278	brown	brown
THAP9-AS1	ZNF160	0.038738	brown	brown
THAP9-AS1	ZNF17	0.006697	brown	brown
THAP9-AS1	ZNF180	0.013895	brown	brown
THAP9-AS1	ZNF182	0.022265	brown	brown
THAP9-AS1	ZNF184	0.037539	brown	brown
THAP9-AS1	ZNF195	0.102964	brown	brown
THAP9-AS1	ZNF202	0.079821	brown	brown
THAP9-AS1	ZNF211	0.048442	brown	brown
THAP9-AS1	ZNF22	0.00644	brown	brown
THAP9-AS1	ZNF222	0.017943	brown	brown
THAP9-AS1	ZNF223	0.030816	brown	brown
THAP9-AS1	ZNF224	0.025779	brown	brown
THAP9-AS1	ZNF250	0.004262	brown	brown
THAP9-AS1	ZNF251	0.030296	brown	brown
THAP9-AS1	ZNF253	0.015327	brown	brown
THAP9-AS1	ZNF254	0.044623	brown	brown
THAP9-AS1	ZNF256	0.039699	brown	brown
THAP9-AS1	ZNF26	0.164743	brown	brown
THAP9-AS1	ZNF260	0.013249	brown	brown
THAP9-AS1	ZNF264	0.008384	brown	brown
THAP9-AS1	ZNF273	0.018031	brown	brown
THAP9-AS1	ZNF28	0.041082	brown	brown
THAP9-AS1	ZNF284	0.002662	brown	brown
THAP9-AS1	ZNF3	0.035047	brown	brown
THAP9-AS1	ZNF311	0.023961	brown	brown
THAP9-AS1	ZNF316	0.033378	brown	brown
THAP9-AS1	ZNF32.AS2	0.038146	brown	NA
THAP9-AS1	ZNF321P	0.119158	brown	brown
THAP9-AS1	ZNF324B	0.005654	brown	brown
THAP9-AS1	ZNF329	0.034223	brown	brown
THAP9-AS1	ZNF337	0.073559	brown	brown
THAP9-AS1	ZNF345	0.040996	brown	brown
THAP9-AS1	ZNF398	0.034579	brown	brown
THAP9-AS1	ZNF419	0.028344	brown	brown
THAP9-AS1	ZNF429	0.023584	brown	brown
THAP9-AS1	ZNF432	0.053948	brown	brown
THAP9-AS1	ZNF433	0.047885	brown	brown
THAP9-AS1	ZNF439	0.028674	brown	brown
THAP9-AS1	ZNF44	0.033475	brown	brown
THAP9-AS1	ZNF443	0.012758	brown	brown
THAP9-AS1	ZNF45	0.016364	brown	brown
THAP9-AS1	ZNF468	0.036318	brown	brown
THAP9-AS1	ZNF480	0.025972	brown	brown
THAP9-AS1	ZNF485	0.02557	brown	brown
THAP9-AS1	ZNF486	0.023504	brown	brown
THAP9-AS1	ZNF492	0.003742	brown	brown
THAP9-AS1	ZNF493	0.074376	brown	brown
THAP9-AS1	ZNF497	0.011743	brown	brown
THAP9-AS1	ZNF500	0.013634	brown	brown
THAP9-AS1	ZNF502	0.014911	brown	brown
THAP9-AS1	ZNF506	0.104431	brown	brown
THAP9-AS1	ZNF512B	0.074933	brown	brown
THAP9-AS1	ZNF514	0.037022	brown	brown
THAP9-AS1	ZNF517	0.002047	brown	brown
THAP9-AS1	ZNF525	0.145608	brown	brown
THAP9-AS1	ZNF526	0.004556	brown	brown
THAP9-AS1	ZNF528	0.025837	brown	brown
THAP9-AS1	ZNF529	0.070118	brown	brown
THAP9-AS1	ZNF543	0.006304	brown	brown
THAP9-AS1	ZNF547	0.021957	brown	brown
THAP9-AS1	ZNF550	0.037314	brown	brown
THAP9-AS1	ZNF552	0.014703	brown	brown
THAP9-AS1	ZNF554	0.021624	brown	brown
THAP9-AS1	ZNF557	0.024116	brown	brown
THAP9-AS1	ZNF559	0.010383	brown	brown
THAP9-AS1	ZNF559.ZNF177	0.043629	brown	NA
THAP9-AS1	ZNF563	0.004573	brown	brown
THAP9-AS1	ZNF564	0.009471	brown	brown
THAP9-AS1	ZNF567	0.011722	brown	brown
THAP9-AS1	ZNF570	0.000856	brown	brown
THAP9-AS1	ZNF571	0.009403	brown	brown
THAP9-AS1	ZNF577	0.01597	brown	brown
THAP9-AS1	ZNF582	0.009573	brown	brown
THAP9-AS1	ZNF587	0.128705	brown	brown
THAP9-AS1	ZNF587B	0.075608	brown	brown
THAP9-AS1	ZNF592	0.030764	brown	brown
THAP9-AS1	ZNF595	0.004296	brown	brown
THAP9-AS1	ZNF597	0.030095	brown	brown
THAP9-AS1	ZNF599	0.005928	brown	brown
THAP9-AS1	ZNF608	0.01504	brown	brown
THAP9-AS1	ZNF620	0.016294	brown	brown
THAP9-AS1	ZNF626	0.022397	brown	brown
THAP9-AS1	ZNF629	0.005955	brown	brown
THAP9-AS1	ZNF646	0.026781	brown	brown
THAP9-AS1	ZNF66	0.029573	brown	brown
THAP9-AS1	ZNF662	0.11336	brown	brown
THAP9-AS1	ZNF668	0.003604	brown	brown
THAP9-AS1	ZNF669	0.004218	brown	brown
THAP9-AS1	ZNF678	0.014929	brown	brown
THAP9-AS1	ZNF680	0.014496	brown	brown
THAP9-AS1	ZNF687	0.058566	brown	brown
THAP9-AS1	ZNF692	0.069957	brown	brown
THAP9-AS1	ZNF696	0.009444	brown	brown
THAP9-AS1	ZNF7	0.072668	brown	brown
THAP9-AS1	ZNF700	0.093911	brown	brown
THAP9-AS1	ZNF701	0.04221	brown	brown
THAP9-AS1	ZNF702P	0.031403	brown	brown
THAP9-AS1	ZNF704	0.008133	brown	brown
THAP9-AS1	ZNF708	0.054955	brown	brown
THAP9-AS1	ZNF713	0.021001	brown	brown
THAP9-AS1	ZNF714	0.021018	brown	brown
THAP9-AS1	ZNF717	0.010105	brown	brown
THAP9-AS1	ZNF724	0.007518	brown	brown
THAP9-AS1	ZNF726	0.02008	brown	brown
THAP9-AS1	ZNF737	0.027289	brown	brown
THAP9-AS1	ZNF75D	0.046168	brown	brown
THAP9-AS1	ZNF76	0.029437	brown	brown
THAP9-AS1	ZNF761	0.036552	brown	brown
THAP9-AS1	ZNF765	0.019001	brown	brown
THAP9-AS1	ZNF766	0.009307	brown	brown
THAP9-AS1	ZNF767P	0.063186	brown	brown
THAP9-AS1	ZNF776	0.026343	brown	brown
THAP9-AS1	ZNF783	0.0681	brown	brown
THAP9-AS1	ZNF790	0.005508	brown	brown
THAP9-AS1	ZNF790.AS1	0.013815	brown	NA
THAP9-AS1	ZNF8	0.043365	brown	brown
THAP9-AS1	ZNF8.ERVK3.1	0.066565	brown	NA
THAP9-AS1	ZNF808	0.046432	brown	brown
THAP9-AS1	ZNF813	0.021162	brown	brown
THAP9-AS1	ZNF816	0.108258	brown	brown
THAP9-AS1	ZNF816.ZNF321P	0.039702	brown	NA
THAP9-AS1	ZNF821	0.001988	brown	brown
THAP9-AS1	ZNF823	0.02278	brown	brown
THAP9-AS1	ZNF83	0.200852	brown	brown
THAP9-AS1	ZNF836	0.024996	brown	brown
THAP9-AS1	ZNF839	0.048942	brown	brown
THAP9-AS1	ZNF841	0.157246	brown	brown
THAP9-AS1	ZNF845	0.029346	brown	brown
THAP9-AS1	ZNF846	0.044894	brown	brown
THAP9-AS1	ZNF85	0.023192	brown	brown
THAP9-AS1	ZNF862	0.013595	brown	brown
THAP9-AS1	ZNF875	0.037402	brown	brown
THAP9-AS1	ZNF880	0.024145	brown	brown
THAP9-AS1	ZNF888	0.058756	brown	brown
THAP9-AS1	ZNF91	0.082012	brown	brown
THAP9-AS1	ZNF93	0.010072	brown	brown
THAP9-AS1	ZNHIT3	0.002365	brown	brown
THAP9-AS1	ZNHIT6	0.013308	brown	brown
THAP9-AS1	ZRSR2P1	0.001428	brown	brown
THAP9-AS1	ZSCAN16	0.00887	brown	brown
THAP9-AS1	ZSCAN25	0.015937	brown	brown
THAP9-AS1	ZSCAN29	0.020134	brown	brown
THAP9-AS1	ZSCAN5C	0.025355	brown	brown
THAP9-AS1	ZSCAN9	0.025427	brown	brown
THAP9-AS1	ZSWIM3	0.002504	brown	brown
THAP9-AS1	ZXDB	0.012476	brown	brown
THAP9-AS1	ZXDC	0.073619	brown	brown

## Sheet: BLCA_tumor
gene1	gene2	correlation	module1	module2
THAP9-AS1	AADAT	0.00107	green	green
THAP9-AS1	AARSD1	0.004052	green	green
THAP9-AS1	ABCA11P	0.00123	green	green
THAP9-AS1	ABCA5	0.001162	green	green
THAP9-AS1	ABCD4	0.001633	green	green
THAP9-AS1	ABHD14A.ACY1	0.000446	green	NA
THAP9-AS1	ABO	0.000184	green	green
THAP9-AS1	ACAD10	9.63e-05	green	green
THAP9-AS1	ACAD8	0.007098	green	green
THAP9-AS1	ACAP3	0.000495	green	green
THAP9-AS1	ACCS	0.000665	green	green
THAP9-AS1	ACIN1	0.009854	green	green
THAP9-AS1	ACTG1P17	0.000381	green	green
THAP9-AS1	ACVR2A	0.000965	green	green
THAP9-AS1	ADAMTS13	0.000932	green	green
THAP9-AS1	ADAT2	0.001444	green	green
THAP9-AS1	ADCY10P1	0.000367	green	green
THAP9-AS1	ADCY6	0.001174	green	green
THAP9-AS1	ADGRF3	0.000192	green	green
THAP9-AS1	ADNP.AS1	0.001346	green	NA
THAP9-AS1	AFG3L1P	0.006256	green	green
THAP9-AS1	AGAP4	0.003579	green	green
THAP9-AS1	AGAP5	0.001806	green	green
THAP9-AS1	AGAP6	0.003368	green	green
THAP9-AS1	AGAP9	0.001234	green	green
THAP9-AS1	AGBL2	0.000495	green	green
THAP9-AS1	AHSA2P	0.0071	green	green
THAP9-AS1	AKAP17A	0.001033	green	green
THAP9-AS1	AKAP8	0.0049	green	green
THAP9-AS1	ALDOC	2.05e-05	green	green
THAP9-AS1	ALG13	0.005977	green	green
THAP9-AS1	ALKBH6	0.001945	green	green
THAP9-AS1	ALOX12.AS1	0.003283	green	NA
THAP9-AS1	AMIGO3	6.13e-05	green	green
THAP9-AS1	ANKMY1	0.003074	green	green
THAP9-AS1	ANKRD10	0.003831	green	green
THAP9-AS1	ANKRD49	0.004426	green	green
THAP9-AS1	ANKZF1	0.002108	green	green
THAP9-AS1	ANO8	0.001312	green	green
THAP9-AS1	APBB3	0.003006	green	green
THAP9-AS1	APOBEC3D	4.66e-06	green	green
THAP9-AS1	AR	0.000115	green	green
THAP9-AS1	ARGLU1	0.014823	green	green
THAP9-AS1	ARHGAP27P1.BPTFP1.KPNA2P3	0.001088	green	NA
THAP9-AS1	ARHGAP40	4.31e-05	green	green
THAP9-AS1	ARHGEF2.AS2	0.000445	green	NA
THAP9-AS1	ARMCX4	0.001189	green	green
THAP9-AS1	ARPC4.TTLL3	0.003818	green	NA
THAP9-AS1	ASB16	0.004435	green	green
THAP9-AS1	ASB16.AS1	0.002751	green	NA
THAP9-AS1	ASNSP3	0.00018	green	green
THAP9-AS1	ASS1P10	7.14e-05	green	green
THAP9-AS1	ASTN2	2.2e-05	green	green
THAP9-AS1	ATP2C2.AS1	0.000115	green	NA
THAP9-AS1	ATP5F1AP3	7.99e-05	green	green
THAP9-AS1	ATP6V1FNB	2.4e-05	green	green
THAP9-AS1	BBS1	0.009646	green	green
THAP9-AS1	BBS5	0.000732	green	green
THAP9-AS1	BCAN	1.07e-05	green	green
THAP9-AS1	BCLAF3	0.004748	green	green
THAP9-AS1	BICRA	0.002319	green	green
THAP9-AS1	BIVM	0.001345	green	green
THAP9-AS1	BMS1P4	0.000816	green	green
THAP9-AS1	BNIP3P19	2.64e-05	green	green
THAP9-AS1	BRF1	0.001239	green	green
THAP9-AS1	C10orf143	0.000124	green	green
THAP9-AS1	C10orf62	3.06e-05	green	green
THAP9-AS1	C14orf93	0.001116	green	green
THAP9-AS1	C19orf44	0.001723	green	green
THAP9-AS1	C19orf67	2.64e-05	green	green
THAP9-AS1	C19orf71	0.000683	green	green
THAP9-AS1	C1orf146	5.68e-05	green	green
THAP9-AS1	C1orf220	0.002319	green	green
THAP9-AS1	C20orf194	0.000618	green	green
THAP9-AS1	C2orf92	0.002148	green	green
THAP9-AS1	C3orf35	0.000718	green	green
THAP9-AS1	C3orf62	0.000936	green	green
THAP9-AS1	C5orf63	0.00109	green	green
THAP9-AS1	C9orf163	0.000741	green	green
THAP9-AS1	CACTIN.AS1	0.001652	green	NA
THAP9-AS1	CALCOCO1	0.002337	green	green
THAP9-AS1	CAPN10.DT	0.00552	green	NA
THAP9-AS1	CAPN12	1.82e-05	green	green
THAP9-AS1	CAPRIN2	0.000212	green	green
THAP9-AS1	CASP9	0.001317	green	green
THAP9-AS1	CATSPER2	0.005367	green	green
THAP9-AS1	CATSPER4	4.07e-05	green	green
THAP9-AS1	CATSPERE	0.000838	green	green
THAP9-AS1	CBR3.AS1	0.000267	green	NA
THAP9-AS1	CBWD3	0.002108	green	green
THAP9-AS1	CBWD6	0.001583	green	green
THAP9-AS1	CBY3	0.000296	green	green
THAP9-AS1	CCDC125	0.001136	green	green
THAP9-AS1	CCDC13.AS1	6.73e-05	green	NA
THAP9-AS1	CCDC14	0.011907	green	green
THAP9-AS1	CCDC17	0.000387	green	green
THAP9-AS1	CCDC183.AS1	0.002046	green	NA
THAP9-AS1	CCDC191	0.004	green	green
THAP9-AS1	CCDC28A.AS1	0.000381	green	NA
THAP9-AS1	CCDC57	0.002191	green	green
THAP9-AS1	CCDC66	0.009936	green	green
THAP9-AS1	CCDC81	0.00028	green	green
THAP9-AS1	CCNL1	0.010494	green	green
THAP9-AS1	CCNT2	0.003856	green	green
THAP9-AS1	CCT6B	0.000237	green	green
THAP9-AS1	CCT6P3	0.005577	green	green
THAP9-AS1	CCT8P1	0.000758	green	green
THAP9-AS1	CDAN1	0.003452	green	green
THAP9-AS1	CDK11A	0.00202	green	green
THAP9-AS1	CDK3	0.006667	green	green
THAP9-AS1	CDKL3	0.001156	green	green
THAP9-AS1	CDNF	7.37e-05	green	green
THAP9-AS1	CDRT4	0.002822	green	green
THAP9-AS1	CECR2	6.83e-05	green	green
THAP9-AS1	CENATAC	0.001828	green	green
THAP9-AS1	CEP290	0.003896	green	green
THAP9-AS1	CEP43	0.002968	green	green
THAP9-AS1	CEP44	0.000133	green	green
THAP9-AS1	CEP95	0.005262	green	green
THAP9-AS1	CES4A	0.001222	green	green
THAP9-AS1	CFAP44	0.007862	green	green
THAP9-AS1	CFAP70	0.000327	green	green
THAP9-AS1	CFL1P1	0.00011	green	green
THAP9-AS1	CGB7	6.21e-06	green	green
THAP9-AS1	CHD3	0.001718	green	green
THAP9-AS1	CHKB.CPT1B	0.002669	green	NA
THAP9-AS1	CIRBP.AS1	0.00014	green	NA
THAP9-AS1	CLBA1	0.000653	green	green
THAP9-AS1	CLCN6	0.00453	green	green
THAP9-AS1	CLHC1	0.002532	green	green
THAP9-AS1	CLK1	0.005193	green	green
THAP9-AS1	CLK2	0.011808	green	green
THAP9-AS1	CLK3	0.00199	green	green
THAP9-AS1	CLK4	0.00313	green	green
THAP9-AS1	CLUHP3	0.003662	green	green
THAP9-AS1	CNTD1	0.0005	green	green
THAP9-AS1	COQ6	0.001298	green	green
THAP9-AS1	COX19	0.001665	green	green
THAP9-AS1	COX4I1P2	0.0002	green	green
THAP9-AS1	CPT1B	0.001747	green	green
THAP9-AS1	CRAMP1	0.004805	green	green
THAP9-AS1	CREBZF	0.007554	green	green
THAP9-AS1	CROCC	0.000795	green	green
THAP9-AS1	CROCCP2	0.007003	green	green
THAP9-AS1	CRTC1	0.000639	green	green
THAP9-AS1	CRYGS	0.000537	green	green
THAP9-AS1	CRYZL1	0.002082	green	green
THAP9-AS1	CSAD	0.004844	green	green
THAP9-AS1	CSPG4P10	0.000879	green	green
THAP9-AS1	CTBP1.AS	0.001501	green	NA
THAP9-AS1	CTC1	0.003224	green	green
THAP9-AS1	CUL9	0.002107	green	green
THAP9-AS1	CUZD1	0.000477	green	green
THAP9-AS1	CXXC1	0.001672	green	green
THAP9-AS1	CYB561D1	0.00036	green	green
THAP9-AS1	CYB5D1	0.00275	green	green
THAP9-AS1	CYP2D6	0.001331	green	green
THAP9-AS1	CYP2D8P	0.000975	green	green
THAP9-AS1	CYP2R1	0.001649	green	green
THAP9-AS1	CYP4F26P	0.000221	green	green
THAP9-AS1	DARS1.AS1	8.06e-05	green	NA
THAP9-AS1	DBIL5P2	1.04e-05	green	green
THAP9-AS1	DCAF4L1	0.000268	green	green
THAP9-AS1	DCST1	0.003449	green	green
THAP9-AS1	DCST2	0.003006	green	green
THAP9-AS1	DCUN1D2	0.003361	green	green
THAP9-AS1	DDTL	0.000848	green	green
THAP9-AS1	DDX17	0.011416	green	green
THAP9-AS1	DDX39B	0.015073	green	green
THAP9-AS1	DDX47	0.005751	green	green
THAP9-AS1	DELE1	0.002509	green	green
THAP9-AS1	DGCR8	0.006166	green	green
THAP9-AS1	DGUOK.AS1	1.28e-05	green	NA
THAP9-AS1	DHX34	0.001362	green	green
THAP9-AS1	DICER1.AS1	0.000603	green	NA
THAP9-AS1	DIP2A	0.007278	green	green
THAP9-AS1	DISP1	0.000323	green	green
THAP9-AS1	DLEC1	9.26e-05	green	green
THAP9-AS1	DMTF1	0.018036	green	green
THAP9-AS1	DNAJC28	0.001421	green	green
THAP9-AS1	DNASE1	0.004374	green	green
THAP9-AS1	DNM2	0.000616	green	green
THAP9-AS1	DPP9.AS1	0.00086	green	NA
THAP9-AS1	DRICH1	4.51e-05	green	green
THAP9-AS1	DTX2P1.UPK3BP1.PMS2P11	0.00019	green	NA
THAP9-AS1	DUSP28	0.001579	green	green
THAP9-AS1	DYNLT2	0.003821	green	green
THAP9-AS1	ECHDC2	0.003928	green	green
THAP9-AS1	EEF1GP4	2.91e-05	green	green
THAP9-AS1	EFHC1	0.00207	green	green
THAP9-AS1	EGFL8	0.002703	green	green
THAP9-AS1	EIF3J.DT	0.001458	green	NA
THAP9-AS1	EIF4A1	0.001858	green	green
THAP9-AS1	ELMOD3	0.005052	green	green
THAP9-AS1	EME2	0.001925	green	green
THAP9-AS1	ENOSF1	0.008971	green	green
THAP9-AS1	EP400P1	0.007202	green	green
THAP9-AS1	EPB41L4A.DT	8.65e-05	green	NA
THAP9-AS1	EPS8L3	4.9e-06	green	green
THAP9-AS1	ERICH6B	0.002871	green	green
THAP9-AS1	ERLNC1	0.000317	green	green
THAP9-AS1	EXOG	0.001559	green	green
THAP9-AS1	EXTL3.AS1	0.001517	green	NA
THAP9-AS1	EZH1	0.002826	green	green
THAP9-AS1	FAHD2CP	0.000114	green	green
THAP9-AS1	FAM106A	1.37e-05	green	green
THAP9-AS1	FAM111A.DT	0.001426	green	NA
THAP9-AS1	FAM13A	0.000352	green	green
THAP9-AS1	FAM219B	0.007979	green	green
THAP9-AS1	FAM221B	4.6e-05	green	green
THAP9-AS1	FAM228B	0.00041	green	green
THAP9-AS1	FAM229A	0.002092	green	green
THAP9-AS1	FAM47E	0.001429	green	green
THAP9-AS1	FAM71F2	0.000212	green	green
THAP9-AS1	FAM76B	0.011232	green	green
THAP9-AS1	FAM86B3P	0.000244	green	green
THAP9-AS1	FANK1	5.06e-05	green	green
THAP9-AS1	FBXL12	0.002381	green	green
THAP9-AS1	FBXO41	0.00116	green	green
THAP9-AS1	FCHSD1	0.002258	green	green
THAP9-AS1	FCSK	0.000278	green	green
THAP9-AS1	FNBP4	0.009615	green	green
THAP9-AS1	FOXD4L1	0.000193	green	green
THAP9-AS1	FOXD4L3	1.5e-05	green	green
THAP9-AS1	FPGT.TNNI3K	0.000723	green	NA
THAP9-AS1	FSIP2.AS2	3.58e-05	green	NA
THAP9-AS1	GABBR1	0.000108	green	green
THAP9-AS1	GABRE	6.19e-05	green	green
THAP9-AS1	GAS8	0.000829	green	green
THAP9-AS1	GATAD1	0.004576	green	green
THAP9-AS1	GATD3B	6.08e-06	green	green
THAP9-AS1	GCATP1	0.000238	green	green
THAP9-AS1	GEMIN7.AS1	0.001445	green	NA
THAP9-AS1	GET4	0.000712	green	green
THAP9-AS1	GGA3	0.004887	green	green
THAP9-AS1	GGNBP1	3.24e-05	green	green
THAP9-AS1	GIGYF1	0.005964	green	green
THAP9-AS1	GJC3	7.2e-06	green	green
THAP9-AS1	GLUD1P2	6.23e-06	green	green
THAP9-AS1	GNRH1	0.000991	green	green
THAP9-AS1	GOLGA2P5	0.001585	green	green
THAP9-AS1	GOLGA6L17P	0.001104	green	green
THAP9-AS1	GOLGA6L3	8.8e-05	green	green
THAP9-AS1	GOLGA6L4	0.001885	green	green
THAP9-AS1	GOLGA6L9	0.007779	green	green
THAP9-AS1	GOLGA8A	0.001758	green	green
THAP9-AS1	GOLGA8B	0.001144	green	green
THAP9-AS1	GOLGA8N	0.000157	green	green
THAP9-AS1	GOLGA8Q	1.93e-05	green	green
THAP9-AS1	GPR199P	0.002267	green	green
THAP9-AS1	GPR89B	0.002978	green	green
THAP9-AS1	GPS2	0.005478	green	green
THAP9-AS1	GS1.124K5.11	0.003523	green	NA
THAP9-AS1	GSAP	0.000482	green	green
THAP9-AS1	GSDMB	0.000215	green	green
THAP9-AS1	GTF2IRD2	0.00233	green	green
THAP9-AS1	GTF2IRD2B	0.002671	green	green
THAP9-AS1	GUCY1B2	4.91e-05	green	green
THAP9-AS1	H1.7	7.12e-06	green	NA
THAP9-AS1	H2BP9	3.63e-05	green	green
THAP9-AS1	H3P14	0.000189	green	green
THAP9-AS1	HCG25	0.003553	green	green
THAP9-AS1	HCN3	0.003634	green	green
THAP9-AS1	HCP5B	1.68e-05	green	green
THAP9-AS1	HDAC2.AS2	0.000722	green	NA
THAP9-AS1	HEMK1	0.001427	green	green
THAP9-AS1	HERC2P2	0.003076	green	green
THAP9-AS1	HERC2P7	0.001487	green	green
THAP9-AS1	HERC2P9	0.00559	green	green
THAP9-AS1	HEXA.AS1	0.00014	green	NA
THAP9-AS1	HEXIM2	0.000654	green	green
THAP9-AS1	HMGB3P29	0.000124	green	green
THAP9-AS1	HNRNPA1L2	0.000994	green	green
THAP9-AS1	HNRNPA1P27	4.16e-05	green	green
THAP9-AS1	HNRNPCP8	1.1e-05	green	green
THAP9-AS1	HOXA13	4.63e-05	green	green
THAP9-AS1	HOXA6	0.000344	green	green
THAP9-AS1	HSBP1L1	0.000113	green	green
THAP9-AS1	HSD17B7P2	0.001024	green	green
THAP9-AS1	HYI	0.000887	green	green
THAP9-AS1	HYKK	0.000727	green	green
THAP9-AS1	HYPK	0.006214	green	green
THAP9-AS1	IBA57.DT	0.00025	green	NA
THAP9-AS1	ID2	0.000122	green	green
THAP9-AS1	IFT80	0.009446	green	green
THAP9-AS1	IGIP	0.001009	green	green
THAP9-AS1	IKBKB	0.001312	green	green
THAP9-AS1	IKBKGP1	0.000516	green	green
THAP9-AS1	INE1	0.004584	green	green
THAP9-AS1	ING5	0.001013	green	green
THAP9-AS1	INPPL1	0.001014	green	green
THAP9-AS1	INTS3	0.012125	green	green
THAP9-AS1	INTS4P1	0.000199	green	green
THAP9-AS1	INTS6.AS1	0.000783	green	NA
THAP9-AS1	INTS6L	0.000645	green	green
THAP9-AS1	IP6K2	0.002233	green	green
THAP9-AS1	IQCH.AS1	0.001365	green	NA
THAP9-AS1	IQCN	0.000398	green	green
THAP9-AS1	IQSEC2	0.000426	green	green
THAP9-AS1	IRF9	0.000453	green	green
THAP9-AS1	ISYNA1	4.44e-06	green	green
THAP9-AS1	ITGA9.AS1	0.000133	green	NA
THAP9-AS1	ITIH4.AS1	1.23e-05	green	NA
THAP9-AS1	IVD	0.001349	green	green
THAP9-AS1	JMJD7	0.000447	green	green
THAP9-AS1	JMJD7.PLA2G4B	0.005043	green	NA
THAP9-AS1	JPX	0.001733	green	green
THAP9-AS1	JRK	0.001475	green	green
THAP9-AS1	KATNBL1	0.002467	green	green
THAP9-AS1	KCNAB3	0.00055	green	green
THAP9-AS1	KCNJ14	7.53e-05	green	green
THAP9-AS1	KCNJ15	5.04e-05	green	green
THAP9-AS1	KCNMB3	0.001319	green	green
THAP9-AS1	KDM4B	0.001858	green	green
THAP9-AS1	KDM5D	2.25e-05	green	green
THAP9-AS1	KHDC4	0.023239	green	green
THAP9-AS1	KIAA0895L	0.002234	green	green
THAP9-AS1	KIF1C.AS1	0.00032	green	NA
THAP9-AS1	KLHDC1	0.000456	green	green
THAP9-AS1	KLHL31	0.001317	green	green
THAP9-AS1	KMT5AP3	2.5e-05	green	green
THAP9-AS1	KRT18P4	9.2e-05	green	green
THAP9-AS1	KRTAP4.1	3.14e-05	green	NA
THAP9-AS1	KRTAP9.1	3.78e-05	green	NA
THAP9-AS1	LAT	0.000221	green	green
THAP9-AS1	LBHD1	0.003084	green	green
THAP9-AS1	LENG8	0.008156	green	green
THAP9-AS1	LENG8.AS1	0.006428	green	NA
THAP9-AS1	LETMD1	0.002245	green	green
THAP9-AS1	LGR4.AS1	6.38e-05	green	NA
THAP9-AS1	LINC00106	0.000358	green	green
THAP9-AS1	LINC00115	0.001591	green	green
THAP9-AS1	LINC00548	6.42e-05	green	green
THAP9-AS1	LINC00677	0.000266	green	green
THAP9-AS1	LINC00847	0.000344	green	green
THAP9-AS1	LINC00865	8.08e-05	green	green
THAP9-AS1	LINC00893	0.003386	green	green
THAP9-AS1	LINC00894	0.00138	green	green
THAP9-AS1	LINC00907	0.000158	green	green
THAP9-AS1	LINC00910	0.001022	green	green
THAP9-AS1	LINC00921	8.15e-05	green	green
THAP9-AS1	LINC01011	0.000231	green	green
THAP9-AS1	LINC01123	7.23e-06	green	green
THAP9-AS1	LINC01290	2.27e-05	green	green
THAP9-AS1	LINC01376	0.000564	green	green
THAP9-AS1	LINC01431	6.41e-05	green	green
THAP9-AS1	LINC02062	6.71e-05	green	green
THAP9-AS1	LINC02363	3e-05	green	green
THAP9-AS1	LINC02389	8.73e-06	green	green
THAP9-AS1	LINC02615	0.000482	green	green
THAP9-AS1	LINC02626	0.000168	green	green
THAP9-AS1	LINC02728	0.000202	green	green
THAP9-AS1	LMBR1L	0.00175	green	green
THAP9-AS1	LMNTD2	0.000805	green	green
THAP9-AS1	LMNTD2.AS1	0.000444	green	NA
THAP9-AS1	LOC100129484	5.95e-05	green	green
THAP9-AS1	LOC100129534	0.000202	green	green
THAP9-AS1	LOC100133091	0.001535	green	green
THAP9-AS1	LOC100286997	0.000216	green	green
THAP9-AS1	LOC100287049	0.001707	green	green
THAP9-AS1	LOC100288123	0.008925	green	green
THAP9-AS1	LOC100288846	4.83e-05	green	green
THAP9-AS1	LOC100419562	4.76e-06	green	green
THAP9-AS1	LOC100419831	0.002147	green	green
THAP9-AS1	LOC100420803	0.000385	green	green
THAP9-AS1	LOC100420981	0.002184	green	green
THAP9-AS1	LOC100506258	0.000669	green	green
THAP9-AS1	LOC100506282	0.001603	green	green
THAP9-AS1	LOC100507053	0.000434	green	green
THAP9-AS1	LOC100507283	0.002553	green	green
THAP9-AS1	LOC100507373	0.000939	green	green
THAP9-AS1	LOC100507551	0.00071	green	green
THAP9-AS1	LOC101926933	0.001171	green	green
THAP9-AS1	LOC101927556	0.00181	green	green
THAP9-AS1	LOC101928525	0.001932	green	green
THAP9-AS1	LOC101929066	6.45e-05	green	green
THAP9-AS1	LOC101929240	0.000702	green	green
THAP9-AS1	LOC101929719	0.000515	green	green
THAP9-AS1	LOC101930370	0.000191	green	green
THAP9-AS1	LOC102546294	0.000146	green	green
THAP9-AS1	LOC102606465	0.000728	green	green
THAP9-AS1	LOC102723322	0.000587	green	green
THAP9-AS1	LOC102723566	0.000362	green	green
THAP9-AS1	LOC102724684	0.00158	green	green
THAP9-AS1	LOC102724814	0.00792	green	green
THAP9-AS1	LOC104968399	0.000864	green	green
THAP9-AS1	LOC105370941	0.003477	green	green
THAP9-AS1	LOC105374042	9.02e-06	green	green
THAP9-AS1	LOC107984813	3.58e-05	green	green
THAP9-AS1	LOC107985040	0.001187	green	green
THAP9-AS1	LOC112267983	0.000678	green	green
THAP9-AS1	LOC153684	0.000215	green	green
THAP9-AS1	LOC155060	0.001379	green	green
THAP9-AS1	LOC220729	0.012093	green	green
THAP9-AS1	LOC283038	0.000249	green	green
THAP9-AS1	LOC399900	3.23e-05	green	green
THAP9-AS1	LOC401127	8.9e-05	green	green
THAP9-AS1	LOC401913	0.000129	green	green
THAP9-AS1	LOC440300	0.000271	green	green
THAP9-AS1	LOC644656	0.000591	green	green
THAP9-AS1	LOC728178	0.000802	green	green
THAP9-AS1	LOC731157	4.31e-05	green	green
THAP9-AS1	LOC84214	0.000651	green	green
THAP9-AS1	LPIN3	0.003693	green	green
THAP9-AS1	LRP5L	0.000219	green	green
THAP9-AS1	LRRC14	0.002933	green	green
THAP9-AS1	LRRC37A	0.000773	green	green
THAP9-AS1	LRRC37A2	0.003337	green	green
THAP9-AS1	LRRC39	0.003268	green	green
THAP9-AS1	LRRC56	0.000757	green	green
THAP9-AS1	LRRC69	6.05e-05	green	green
THAP9-AS1	LRRD1	0.000196	green	green
THAP9-AS1	LUC7L3	0.014238	green	green
THAP9-AS1	LY6G5B	0.007301	green	green
THAP9-AS1	LYRM9	0.00048	green	green
THAP9-AS1	MAMDC4	0.000146	green	green
THAP9-AS1	MAN2C1	0.00384	green	green
THAP9-AS1	MAP3K12	0.000166	green	green
THAP9-AS1	MAP3K2.DT	2.18e-05	green	NA
THAP9-AS1	MAPK10	0.001913	green	green
THAP9-AS1	MAPK8IP3	0.00284	green	green
THAP9-AS1	MATN1.AS1	0.000622	green	NA
THAP9-AS1	MAU2	0.006972	green	green
THAP9-AS1	MC1R	6.43e-05	green	green
THAP9-AS1	METAP1D	0.000514	green	green
THAP9-AS1	METTL14.DT	0.000348	green	NA
THAP9-AS1	METTL17	0.001377	green	green
THAP9-AS1	METTL3	0.00722	green	green
THAP9-AS1	MFSD8	0.010514	green	green
THAP9-AS1	MIGA2	0.0042	green	green
THAP9-AS1	MIR106B	0.00015	green	green
THAP9-AS1	MIR10B	9.27e-06	green	green
THAP9-AS1	MIR1180	7.61e-05	green	green
THAP9-AS1	MIR1249	0.000171	green	green
THAP9-AS1	MIR141	4.66e-05	green	green
THAP9-AS1	MIR149	8.19e-05	green	green
THAP9-AS1	MIR200A	0.000441	green	green
THAP9-AS1	MIR200B	0.000406	green	green
THAP9-AS1	MIR200C	7.98e-05	green	green
THAP9-AS1	MIR210	0.000211	green	green
THAP9-AS1	MIR210HG	0.000549	green	green
THAP9-AS1	MIR219A1	1.73e-05	green	green
THAP9-AS1	MIR25	0.001091	green	green
THAP9-AS1	MIR26B	0.000136	green	green
THAP9-AS1	MIR324	0.000273	green	green
THAP9-AS1	MIR331	0.001655	green	green
THAP9-AS1	MIR34AHG	0.000285	green	green
THAP9-AS1	MIR3677	0.000867	green	green
THAP9-AS1	MIR3685	0.001219	green	green
THAP9-AS1	MIR3936HG	0.00138	green	green
THAP9-AS1	MIR3942	0.0003	green	green
THAP9-AS1	MIR429	0.001013	green	green
THAP9-AS1	MIR4326	0.000489	green	green
THAP9-AS1	MIR4489	2.86e-05	green	green
THAP9-AS1	MIR4685	2.06e-05	green	green
THAP9-AS1	MIR4701	0.000772	green	green
THAP9-AS1	MIR4730	3.28e-05	green	green
THAP9-AS1	MIR4786	0.000183	green	green
THAP9-AS1	MIR499A	6.57e-05	green	green
THAP9-AS1	MIR548AR	0.000534	green	green
THAP9-AS1	MIR6071	1.56e-05	green	green
THAP9-AS1	MIR647	0.00535	green	green
THAP9-AS1	MIR6514	4.29e-05	green	green
THAP9-AS1	MIR6728	1.03e-05	green	green
THAP9-AS1	MIR6736	1.36e-05	green	green
THAP9-AS1	MIR6739	0.001977	green	green
THAP9-AS1	MIR6740	0.000455	green	green
THAP9-AS1	MIR6753	0.000169	green	green
THAP9-AS1	MIR6763	0.000252	green	green
THAP9-AS1	MIR6812	6.42e-05	green	green
THAP9-AS1	MIR6814	0.000146	green	green
THAP9-AS1	MIR6819	0.000151	green	green
THAP9-AS1	MIR6832	5.05e-05	green	green
THAP9-AS1	MIR6835	0.00078	green	green
THAP9-AS1	MIR6859.1	0.000169	green	NA
THAP9-AS1	MIR6859.2	0.00026	green	NA
THAP9-AS1	MIR6864	1.27e-05	green	green
THAP9-AS1	MIR6895	5.81e-05	green	green
THAP9-AS1	MIR7111	3.56e-05	green	green
THAP9-AS1	MIR765	0.000436	green	green
THAP9-AS1	MIR7851	0.000438	green	green
THAP9-AS1	MIR7974	5.33e-05	green	green
THAP9-AS1	MIR8078	1.94e-05	green	green
THAP9-AS1	MIR93	0.000299	green	green
THAP9-AS1	MIRLET7D	0.000373	green	green
THAP9-AS1	MISP3	6.78e-05	green	green
THAP9-AS1	MLLT6	0.001088	green	green
THAP9-AS1	MLYCD	0.000488	green	green
THAP9-AS1	MMP23A	5.53e-06	green	green
THAP9-AS1	MORN1	0.00112	green	green
THAP9-AS1	MRFAP1L1	0.000163	green	green
THAP9-AS1	MRI1	0.001906	green	green
THAP9-AS1	MRNIP	0.006057	green	green
THAP9-AS1	MROH1	0.001002	green	green
THAP9-AS1	MROH3P	6.08e-06	green	green
THAP9-AS1	MROH7	5.18e-05	green	green
THAP9-AS1	MROH7.TTC4	2.4e-05	green	NA
THAP9-AS1	MSANTD1	0.000168	green	green
THAP9-AS1	MSANTD2	0.011514	green	green
THAP9-AS1	MSH5	0.006513	green	green
THAP9-AS1	MSH5.SAPCD1	0.000616	green	NA
THAP9-AS1	MSS51	0.001118	green	green
THAP9-AS1	MST1	0.000268	green	green
THAP9-AS1	MTA1	0.002363	green	green
THAP9-AS1	MTATP6P26	0.000135	green	green
THAP9-AS1	MTCP1	0.000322	green	green
THAP9-AS1	MTERF2	0.006781	green	green
THAP9-AS1	MTFR1L	0.003546	green	green
THAP9-AS1	MTG1	0.001084	green	green
THAP9-AS1	MTHFSD	0.001515	green	green
THAP9-AS1	MTMR3	0.000746	green	green
THAP9-AS1	MTMR8	0.000181	green	green
THAP9-AS1	MTRF1	0.002506	green	green
THAP9-AS1	MUSTN1	1.15e-05	green	green
THAP9-AS1	MYO15B	0.000411	green	green
THAP9-AS1	MZF1	0.005079	green	green
THAP9-AS1	MZF1.AS1	0.001262	green	NA
THAP9-AS1	N4BP2L2	0.001549	green	green
THAP9-AS1	N6AMT1	0.002334	green	green
THAP9-AS1	NANOGP8	8.16e-05	green	green
THAP9-AS1	NAXD	0.001796	green	green
THAP9-AS1	NBPF12	0.007382	green	green
THAP9-AS1	NBR2	0.001199	green	green
THAP9-AS1	NCKAP5L	0.00039	green	green
THAP9-AS1	NDST2	0.000959	green	green
THAP9-AS1	NDUFA6.DT	0.00184	green	NA
THAP9-AS1	NDUFB4P8	0.000185	green	green
THAP9-AS1	NDUFV2.AS1	0.002161	green	NA
THAP9-AS1	NECAB3	0.000443	green	green
THAP9-AS1	NEIL1	0.001455	green	green
THAP9-AS1	NFKBID	0.000292	green	green
THAP9-AS1	NFRKB	0.005256	green	green
THAP9-AS1	NICN1	0.000987	green	green
THAP9-AS1	NISCH	0.00323	green	green
THAP9-AS1	NKTR	0.014739	green	green
THAP9-AS1	NME5	1.66e-05	green	green
THAP9-AS1	NMRK1	4.06e-05	green	green
THAP9-AS1	NPAP1	2.62e-06	green	green
THAP9-AS1	NPHP3	0.006734	green	green
THAP9-AS1	NPIPA1	0.000521	green	green
THAP9-AS1	NPIPA5	9.68e-05	green	green
THAP9-AS1	NPIPB14P	0.001102	green	green
THAP9-AS1	NPIPB3	0.001753	green	green
THAP9-AS1	NPIPB4	0.000846	green	green
THAP9-AS1	NPIPB5	0.000488	green	green
THAP9-AS1	NPM1P25	4.43e-05	green	green
THAP9-AS1	NR2C1	0.004873	green	green
THAP9-AS1	NRBP2	0.000743	green	green
THAP9-AS1	NRIP2	0.000312	green	green
THAP9-AS1	NSMCE1.DT	0.000338	green	NA
THAP9-AS1	NTN5	3.71e-05	green	green
THAP9-AS1	NUMA1	0.002036	green	green
THAP9-AS1	NUP42	0.003492	green	green
THAP9-AS1	NXF1	0.002729	green	green
THAP9-AS1	OBI1.AS1	0.000546	green	NA
THAP9-AS1	OBSCN.AS1	0.000122	green	NA
THAP9-AS1	OCIAD1.AS1	0.002143	green	NA
THAP9-AS1	ODF2L	0.002193	green	green
THAP9-AS1	OFD1	0.00361	green	green
THAP9-AS1	OGFR.AS1	0.000431	green	NA
THAP9-AS1	OGT	0.006129	green	green
THAP9-AS1	OMP	7.8e-05	green	green
THAP9-AS1	OR10AD1	2.21e-05	green	green
THAP9-AS1	OR1H1P	0.000113	green	green
THAP9-AS1	OR1Q1	6.33e-05	green	green
THAP9-AS1	OR5K2	4.61e-05	green	green
THAP9-AS1	OR5M11	0.000161	green	green
THAP9-AS1	OR5M5P	1.61e-05	green	green
THAP9-AS1	ORAOV1P1	0.000318	green	green
THAP9-AS1	ORMDL1	0.003064	green	green
THAP9-AS1	OSBPL2	0.002379	green	green
THAP9-AS1	OSGEP	0.002336	green	green
THAP9-AS1	OVCH2	0.000391	green	green
THAP9-AS1	OXSM	0.002577	green	green
THAP9-AS1	PABPN1	0.003247	green	green
THAP9-AS1	PACERR	6.23e-06	green	green
THAP9-AS1	PARD3.AS1	2.6e-05	green	NA
THAP9-AS1	PASK	0.001737	green	green
THAP9-AS1	PAXBP1	0.004232	green	green
THAP9-AS1	PAXIP1.DT	0.000974	green	NA
THAP9-AS1	PCAT6	1.29e-05	green	green
THAP9-AS1	PCF11	0.008941	green	green
THAP9-AS1	PCGF3	0.005488	green	green
THAP9-AS1	PCMTD1	0.002419	green	green
THAP9-AS1	PCNX2	0.001488	green	green
THAP9-AS1	PCYOX1L	0.000903	green	green
THAP9-AS1	PDE8A	0.004047	green	green
THAP9-AS1	PDPK2P	0.00038	green	green
THAP9-AS1	PDXDC2P.NPIPB14P	0.001758	green	NA
THAP9-AS1	PFKFB1	0.000339	green	green
THAP9-AS1	PGBD2	0.002871	green	green
THAP9-AS1	PGBD4	0.002445	green	green
THAP9-AS1	PGK1P2	0.000293	green	green
THAP9-AS1	PGK2	1.28e-05	green	green
THAP9-AS1	PHKA2	0.001115	green	green
THAP9-AS1	PHLPP1	0.000632	green	green
THAP9-AS1	PHYKPL	0.003082	green	green
THAP9-AS1	PIGL	0.003646	green	green
THAP9-AS1	PIGZ	8.68e-05	green	green
THAP9-AS1	PIK3IP1.DT	2.73e-05	green	NA
THAP9-AS1	PILRB	0.000733	green	green
THAP9-AS1	PJVK	0.000489	green	green
THAP9-AS1	PKD1P4	0.001245	green	green
THAP9-AS1	PLA2G4B	0.00088	green	green
THAP9-AS1	PLEKHG7	2.42e-05	green	green
THAP9-AS1	PLEKHH1	0.000332	green	green
THAP9-AS1	PLGLB1	0.000676	green	green
THAP9-AS1	PLK5	4.58e-06	green	green
THAP9-AS1	PLXNB1	0.001285	green	green
THAP9-AS1	PMFBP1	6.99e-05	green	green
THAP9-AS1	PMS2P3	0.005549	green	green
THAP9-AS1	PNCK	1.33e-05	green	green
THAP9-AS1	PNISR	0.01746	green	green
THAP9-AS1	POFUT2	0.002102	green	green
THAP9-AS1	POLG2	0.003516	green	green
THAP9-AS1	POLI	0.004128	green	green
THAP9-AS1	POLR2J4	0.000774	green	green
THAP9-AS1	PPIP5K1	0.002473	green	green
THAP9-AS1	PPP1R3E	0.004885	green	green
THAP9-AS1	PPP3CB.AS1	0.000606	green	NA
THAP9-AS1	PPT2.EGFL8	0.003745	green	NA
THAP9-AS1	PRDM15	0.002579	green	green
THAP9-AS1	PRICKLE4	0.000474	green	green
THAP9-AS1	PRKY	1.86e-05	green	green
THAP9-AS1	PRMT5.AS1	0.00288	green	NA
THAP9-AS1	PRORSD1P	0.000655	green	green
THAP9-AS1	PROZ	8.53e-05	green	green
THAP9-AS1	PRPF39	0.022838	green	green
THAP9-AS1	PRRT1	5.69e-05	green	green
THAP9-AS1	PRSS53	0.000937	green	green
THAP9-AS1	PSMA3.AS1	0.012324	green	NA
THAP9-AS1	PSMC1P7	6.85e-05	green	green
THAP9-AS1	PSMC3P1	6.08e-05	green	green
THAP9-AS1	PWWP3A	0.001338	green	green
THAP9-AS1	RAB40A	0.000432	green	green
THAP9-AS1	RAB40B	0.000195	green	green
THAP9-AS1	RABL2A	0.004123	green	green
THAP9-AS1	RABL2B	0.001781	green	green
THAP9-AS1	RAD51.AS1	0.008597	green	NA
THAP9-AS1	RAD52	0.001903	green	green
THAP9-AS1	RALGPS1	0.001847	green	green
THAP9-AS1	RB1.DT	0.000133	green	NA
THAP9-AS1	RBM25	0.01265	green	green
THAP9-AS1	RBM26.AS1	0.000799	green	NA
THAP9-AS1	RBM39	0.00908	green	green
THAP9-AS1	RBM5	0.007599	green	green
THAP9-AS1	RBM6	0.003721	green	green
THAP9-AS1	RCOR3	0.008125	green	green
THAP9-AS1	RECQL5	0.002021	green	green
THAP9-AS1	RFPL3S	0.000346	green	green
THAP9-AS1	RFX2	4.42e-05	green	green
THAP9-AS1	RGL2	0.002469	green	green
THAP9-AS1	RGMB.AS1	0.000138	green	NA
THAP9-AS1	RGS6	7.38e-05	green	green
THAP9-AS1	RHBDL1	5.32e-05	green	green
THAP9-AS1	RIC3	7.75e-05	green	green
THAP9-AS1	RN7SKP116	0.000131	green	green
THAP9-AS1	RN7SKP160	0.000175	green	green
THAP9-AS1	RN7SL268P	0.00044	green	green
THAP9-AS1	RN7SL403P	0.000401	green	green
THAP9-AS1	RN7SL477P	0.000172	green	green
THAP9-AS1	RN7SL574P	0.001618	green	green
THAP9-AS1	RN7SL865P	2.21e-05	green	green
THAP9-AS1	RNA5SP132	4.57e-05	green	green
THAP9-AS1	RNA5SP203	0.00125	green	green
THAP9-AS1	RNA5SP383	0.001886	green	green
THAP9-AS1	RNF139.AS1	0.002778	green	NA
THAP9-AS1	RNF151	1.15e-05	green	green
THAP9-AS1	RNF157.AS1	0.000105	green	NA
THAP9-AS1	RNF207	0.001802	green	green
THAP9-AS1	RNPC3	0.001283	green	green
THAP9-AS1	RNU1.103P	0.000806	green	NA
THAP9-AS1	RNU1.153P	0.000679	green	NA
THAP9-AS1	RNU12.2P	0.000164	green	NA
THAP9-AS1	RNU2.51P	6.72e-05	green	NA
THAP9-AS1	RNU4.39P	7.07e-05	green	NA
THAP9-AS1	RNU4.52P	0.000806	green	NA
THAP9-AS1	RNU5E.10P	0.000149	green	NA
THAP9-AS1	RNU6.1011P	2.08e-05	green	NA
THAP9-AS1	RNU6.1095P	0.002108	green	NA
THAP9-AS1	RNU6.1136P	5.06e-05	green	NA
THAP9-AS1	RNU6.1205P	3.24e-05	green	NA
THAP9-AS1	RNU6.1238P	0.000351	green	NA
THAP9-AS1	RNU6.312P	0.002188	green	NA
THAP9-AS1	RNU6.322P	0.000294	green	NA
THAP9-AS1	RNU6.388P	3.27e-05	green	NA
THAP9-AS1	RNU6.418P	0.000321	green	NA
THAP9-AS1	RNU6.476P	0.000564	green	NA
THAP9-AS1	RNU6.483P	0.000177	green	NA
THAP9-AS1	RNU6.554P	1.84e-05	green	NA
THAP9-AS1	RNU6.610P	0.001039	green	NA
THAP9-AS1	RNU6.623P	0.000153	green	NA
THAP9-AS1	RNU6.762P	0.001265	green	NA
THAP9-AS1	RNU6.833P	0.000106	green	NA
THAP9-AS1	RNU6.882P	0.00082	green	NA
THAP9-AS1	RNU6.925P	3.33e-05	green	NA
THAP9-AS1	RNU6.94P	2.93e-05	green	NA
THAP9-AS1	RNY4P10	0.003701	green	green
THAP9-AS1	RPL12P25	0.000124	green	green
THAP9-AS1	RPL21P122	1.84e-05	green	green
THAP9-AS1	RPL21P125	0.001432	green	green
THAP9-AS1	RPL22P19	2.49e-05	green	green
THAP9-AS1	RPL23AP15	3.23e-05	green	green
THAP9-AS1	RPL23AP21	0.000115	green	green
THAP9-AS1	RPL23AP5	0.000232	green	green
THAP9-AS1	RPL23AP66	0.000589	green	green
THAP9-AS1	RPL23AP85	5.44e-05	green	green
THAP9-AS1	RPL23P2	0.001393	green	green
THAP9-AS1	RPL31P46	8.51e-05	green	green
THAP9-AS1	RPL32P3	0.01171	green	green
THAP9-AS1	RPL3P13	0.000108	green	green
THAP9-AS1	RPL8P5	0.000507	green	green
THAP9-AS1	RPS20P33	2.84e-05	green	green
THAP9-AS1	RPS21P1	0.000316	green	green
THAP9-AS1	RPS2P1	2.04e-05	green	green
THAP9-AS1	RPS3AP53	0.000311	green	green
THAP9-AS1	RPS4XP16	0.000463	green	green
THAP9-AS1	RPS4Y1	4.89e-06	green	green
THAP9-AS1	RPS6KA6	0.000723	green	green
THAP9-AS1	RSAD1	0.000889	green	green
THAP9-AS1	RSPH10B	0.000232	green	green
THAP9-AS1	RSRP1	0.009648	green	green
THAP9-AS1	RTEL1.TNFRSF6B	0.001756	green	NA
THAP9-AS1	RUSC1.AS1	0.010013	green	NA
THAP9-AS1	RWDD3	0.002263	green	green
THAP9-AS1	SAPCD1	0.000891	green	green
THAP9-AS1	SCAMP1.AS1	0.000387	green	NA
THAP9-AS1	SCART1	0.000207	green	green
THAP9-AS1	SCAT2	0.000889	green	green
THAP9-AS1	SDHAP1	0.008098	green	green
THAP9-AS1	SDHAP2	0.001238	green	green
THAP9-AS1	SDR39U1	0.003738	green	green
THAP9-AS1	SEC14L1P1	0.001126	green	green
THAP9-AS1	SEC1P	2.45e-05	green	green
THAP9-AS1	SEC24B.AS1	0.002688	green	NA
THAP9-AS1	SEC31B	0.000828	green	green
THAP9-AS1	SELENBP1	5.03e-05	green	green
THAP9-AS1	SEMA3F.AS1	0.004078	green	NA
THAP9-AS1	SEMA6A	3.36e-05	green	green
THAP9-AS1	SEMA6A.AS2	3.76e-05	green	NA
THAP9-AS1	SEPTIN7P14	0.008403	green	green
THAP9-AS1	SEPTIN7P2	0.013629	green	green
THAP9-AS1	SETD4	0.005044	green	green
THAP9-AS1	SFI1	0.000156	green	green
THAP9-AS1	SFSWAP	0.003436	green	green
THAP9-AS1	SGSM2	0.003822	green	green
THAP9-AS1	SH3BP2	0.000318	green	green
THAP9-AS1	SH3BP5.AS1	0.003348	green	NA
THAP9-AS1	SH3D21	0.000678	green	green
THAP9-AS1	SHROOM1	0.000454	green	green
THAP9-AS1	SIN3B	0.002947	green	green
THAP9-AS1	SLC16A8	0.000269	green	green
THAP9-AS1	SLC22A5	0.001434	green	green
THAP9-AS1	SLC23A2	0.000127	green	green
THAP9-AS1	SLC25A16	0.001137	green	green
THAP9-AS1	SLC25A36	0.012834	green	green
THAP9-AS1	SLC25A36P1	0.000116	green	green
THAP9-AS1	SLC25A38	0.000583	green	green
THAP9-AS1	SLC25A6P4	5.34e-05	green	green
THAP9-AS1	SLC26A1	0.002104	green	green
THAP9-AS1	SLC26A5	6.58e-05	green	green
THAP9-AS1	SLC26A8	0.000337	green	green
THAP9-AS1	SLC2A11	0.00064	green	green
THAP9-AS1	SLC35E2A	0.00316	green	green
THAP9-AS1	SLC35E2B	0.006217	green	green
THAP9-AS1	SLC35G5	2.04e-05	green	green
THAP9-AS1	SLC6A8	1.76e-05	green	green
THAP9-AS1	SLX1A.SULT1A3	0.000626	green	NA
THAP9-AS1	SMCR2	5.28e-05	green	green
THAP9-AS1	SMG1P7	0.000196	green	green
THAP9-AS1	SMPD4BP	0.003794	green	green
THAP9-AS1	SNORA59B	0.001946	green	green
THAP9-AS1	SNORA60	0.001496	green	green
THAP9-AS1	SNORA9B	0.000998	green	green
THAP9-AS1	SNORD100	0.000323	green	green
THAP9-AS1	SNORD124	0.00067	green	green
THAP9-AS1	SNORD14A	0.000404	green	green
THAP9-AS1	SNORD36C	0.000179	green	green
THAP9-AS1	SNORD48	9.55e-05	green	green
THAP9-AS1	SNORD51	6.49e-05	green	green
THAP9-AS1	SNORD7	0.000957	green	green
THAP9-AS1	SNX15	0.006459	green	green
THAP9-AS1	SPACA5	6.09e-05	green	green
THAP9-AS1	SPATA25	0.00168	green	green
THAP9-AS1	SPATA6L	0.000157	green	green
THAP9-AS1	SPATA7	0.001041	green	green
THAP9-AS1	SPIN3	0.008202	green	green
THAP9-AS1	SPRY3	0.000746	green	green
THAP9-AS1	SPSB3	0.001095	green	green
THAP9-AS1	SPTY2D1OS	0.000828	green	green
THAP9-AS1	SREK1	0.010886	green	green
THAP9-AS1	SRRM2.AS1	0.00104	green	NA
THAP9-AS1	SRRM5	0.001875	green	green
THAP9-AS1	SRSF11	0.02152	green	green
THAP9-AS1	SRSF5	0.002294	green	green
THAP9-AS1	SRSF6	0.005195	green	green
THAP9-AS1	SS18L1	0.005026	green	green
THAP9-AS1	ST6GALNAC4P1	0.000365	green	green
THAP9-AS1	STAG3L5P	0.006935	green	green
THAP9-AS1	STAG3L5P.PVRIG2P.PILRB	0.003338	green	NA
THAP9-AS1	STAM.AS1	0.001874	green	NA
THAP9-AS1	STK36	0.004361	green	green
THAP9-AS1	STRADA	0.002478	green	green
THAP9-AS1	STRCP1	0.000262	green	green
THAP9-AS1	STX16	0.005508	green	green
THAP9-AS1	STX16.NPEPL1	0.002176	green	NA
THAP9-AS1	SULT1A3	0.000484	green	green
THAP9-AS1	SYNGAP1	0.001906	green	green
THAP9-AS1	SYT17	0.000439	green	green
THAP9-AS1	SZT2	0.005471	green	green
THAP9-AS1	TAF1C	0.002875	green	green
THAP9-AS1	TAF1D	0.000582	green	green
THAP9-AS1	TAPT1.AS1	0.000951	green	NA
THAP9-AS1	TARBP1	0.002963	green	green
THAP9-AS1	TAS2R38	0.000137	green	green
THAP9-AS1	TBC1D3B	0.000389	green	green
THAP9-AS1	TBC1D3P2	9.58e-05	green	green
THAP9-AS1	TBC1D8	0.000267	green	green
THAP9-AS1	TBC1D8.AS1	0.000279	green	NA
THAP9-AS1	TBILA	6.17e-05	green	green
THAP9-AS1	TBRG1	0.003666	green	green
THAP9-AS1	TBX19	0.000298	green	green
THAP9-AS1	TEAD3	0.000763	green	green
THAP9-AS1	TEN1.CDK3	0.005286	green	NA
THAP9-AS1	TEPSIN	0.003524	green	green
THAP9-AS1	TEX22	0.000282	green	green
THAP9-AS1	TEX38	8.95e-05	green	green
THAP9-AS1	THAP9.AS1	1	green	NA
THAP9-AS1	THBS4.AS1	0.000129	green	NA
THAP9-AS1	THEM4	8.39e-05	green	green
THAP9-AS1	THUMPD2	0.004942	green	green
THAP9-AS1	TIA1	0.010026	green	green
THAP9-AS1	TIGD1	0.000236	green	green
THAP9-AS1	TLCD4.RWDD3	0.002644	green	NA
THAP9-AS1	TMCO6	0.002393	green	green
THAP9-AS1	TMEM116	6.38e-05	green	green
THAP9-AS1	TMEM161B.AS1	0.001758	green	NA
THAP9-AS1	TMEM198B	0.005104	green	green
THAP9-AS1	TMEM243	0.001056	green	green
THAP9-AS1	TMEM260	0.003209	green	green
THAP9-AS1	TMEM262	0.00597	green	green
THAP9-AS1	TMEM8B	0.000552	green	green
THAP9-AS1	TMEM94	0.002686	green	green
THAP9-AS1	TMEM9B.AS1	0.000528	green	NA
THAP9-AS1	TMPRSS5	0.000138	green	green
THAP9-AS1	TNFRSF25	0.000364	green	green
THAP9-AS1	TNFSF15	3.77e-05	green	green
THAP9-AS1	TNK2	0.00047	green	green
THAP9-AS1	TOLLIP.AS1	7.73e-05	green	NA
THAP9-AS1	TP53INP1	0.000666	green	green
THAP9-AS1	TPCN1	0.000239	green	green
THAP9-AS1	TPRG1LP1	0.000111	green	green
THAP9-AS1	TRA2A	0.006543	green	green
THAP9-AS1	TRAF5	0.00014	green	green
THAP9-AS1	TRAPPC2	0.001945	green	green
THAP9-AS1	TRIM13	0.00066	green	green
THAP9-AS1	TRIM31.AS1	1.22e-05	green	NA
THAP9-AS1	TRIM52	0.01244	green	green
THAP9-AS1	TRIM66	0.001496	green	green
THAP9-AS1	TRIM74	0.004266	green	green
THAP9-AS1	TRMT13	0.012993	green	green
THAP9-AS1	TSC1	0.00604	green	green
THAP9-AS1	TSC22D1.AS1	0.000332	green	NA
THAP9-AS1	TSGA10	0.002049	green	green
THAP9-AS1	TSPOAP1	0.00045	green	green
THAP9-AS1	TSPYL2	0.000506	green	green
THAP9-AS1	TSSK6	0.000775	green	green
THAP9-AS1	TTC14	0.012651	green	green
THAP9-AS1	TTC21A	0.001295	green	green
THAP9-AS1	TTC28.AS1	0.001368	green	NA
THAP9-AS1	TTC31	0.002768	green	green
THAP9-AS1	TTC34	0.001092	green	green
THAP9-AS1	TTC6	0.000744	green	green
THAP9-AS1	TTLL3	0.004618	green	green
THAP9-AS1	TTTY14	2.79e-06	green	green
THAP9-AS1	TUBAP8	0.000121	green	green
THAP9-AS1	TUBAP9	0.000199	green	green
THAP9-AS1	TUBE1	0.00329	green	green
THAP9-AS1	TUBGCP6	0.007322	green	green
THAP9-AS1	TULP1	0.000297	green	green
THAP9-AS1	TXLNGY	4.73e-05	green	green
THAP9-AS1	TYK2	0.001767	green	green
THAP9-AS1	U2AF1	0.00157	green	green
THAP9-AS1	UBAP1L	0.002968	green	green
THAP9-AS1	UBE2CP2	3.66e-05	green	green
THAP9-AS1	UBE2FP3	0.000477	green	green
THAP9-AS1	UBE2Q2P1	0.001354	green	green
THAP9-AS1	UGGT2	0.001017	green	green
THAP9-AS1	ULK3	0.003307	green	green
THAP9-AS1	UPF3A	0.003387	green	green
THAP9-AS1	URAHP	0.002209	green	green
THAP9-AS1	USP9Y	2.61e-05	green	green
THAP9-AS1	UVSSA	0.004922	green	green
THAP9-AS1	VASH1.AS1	0.000419	green	NA
THAP9-AS1	VEGFA	0.00029	green	green
THAP9-AS1	VMP1	3.34e-05	green	green
THAP9-AS1	VN1R20P	5.37e-05	green	green
THAP9-AS1	WBP1	0.007451	green	green
THAP9-AS1	WBP2NL	0.000551	green	green
THAP9-AS1	WDR5B	0.002569	green	green
THAP9-AS1	WDR6	0.003141	green	green
THAP9-AS1	WDR73	0.010404	green	green
THAP9-AS1	WDR90	0.002836	green	green
THAP9-AS1	WDR97	0.001985	green	green
THAP9-AS1	WEE2.AS1	0.000106	green	NA
THAP9-AS1	WFIKKN1	2.52e-05	green	green
THAP9-AS1	WSB1	0.003013	green	green
THAP9-AS1	YJEFN3	0.000286	green	green
THAP9-AS1	ZBED5	0.004962	green	green
THAP9-AS1	ZBTB3	0.001217	green	green
THAP9-AS1	ZBTB40	0.004677	green	green
THAP9-AS1	ZBTB44.DT	0.000131	green	NA
THAP9-AS1	ZBTB49	0.005341	green	green
THAP9-AS1	ZC3H12B	0.000312	green	green
THAP9-AS1	ZDHHC21	0.003824	green	green
THAP9-AS1	ZFC3H1	0.002165	green	green
THAP9-AS1	ZFP62	0.00437	green	green
THAP9-AS1	ZKSCAN1	0.007658	green	green
THAP9-AS1	ZMAT1	0.000227	green	green
THAP9-AS1	ZMIZ1.AS1	1.32e-05	green	NA
THAP9-AS1	ZMYM2	0.008462	green	green
THAP9-AS1	ZMYM6	0.010901	green	green
THAP9-AS1	ZMYND8	0.001007	green	green
THAP9-AS1	ZNF10	0.004489	green	green
THAP9-AS1	ZNF121	0.002682	green	green
THAP9-AS1	ZNF133	0.003464	green	green
THAP9-AS1	ZNF160	0.008174	green	green
THAP9-AS1	ZNF169	0.00846	green	green
THAP9-AS1	ZNF177	0.000191	green	green
THAP9-AS1	ZNF182	0.004662	green	green
THAP9-AS1	ZNF19	0.000734	green	green
THAP9-AS1	ZNF192P1	0.0002	green	green
THAP9-AS1	ZNF20	0.001043	green	green
THAP9-AS1	ZNF202	0.003921	green	green
THAP9-AS1	ZNF211	0.002727	green	green
THAP9-AS1	ZNF219	0.0004	green	green
THAP9-AS1	ZNF223	0.002412	green	green
THAP9-AS1	ZNF224	0.006163	green	green
THAP9-AS1	ZNF226	0.002669	green	green
THAP9-AS1	ZNF23	0.002834	green	green
THAP9-AS1	ZNF248	0.006671	green	green
THAP9-AS1	ZNF251	0.001373	green	green
THAP9-AS1	ZNF252P.AS1	0.001351	green	NA
THAP9-AS1	ZNF26	0.006112	green	green
THAP9-AS1	ZNF266	0.004289	green	green
THAP9-AS1	ZNF276	0.001781	green	green
THAP9-AS1	ZNF316	0.002399	green	green
THAP9-AS1	ZNF32.AS1	0.002049	green	NA
THAP9-AS1	ZNF32.AS2	0.005401	green	NA
THAP9-AS1	ZNF320	0.000997	green	green
THAP9-AS1	ZNF333	0.006772	green	green
THAP9-AS1	ZNF335	0.003131	green	green
THAP9-AS1	ZNF337	0.007782	green	green
THAP9-AS1	ZNF33B	0.001359	green	green
THAP9-AS1	ZNF354B	0.00692	green	green
THAP9-AS1	ZNF37BP	0.008062	green	green
THAP9-AS1	ZNF396	0.001302	green	green
THAP9-AS1	ZNF426.DT	9.87e-05	green	NA
THAP9-AS1	ZNF436.AS1	0.004487	green	NA
THAP9-AS1	ZNF441	0.004532	green	green
THAP9-AS1	ZNF443	0.003771	green	green
THAP9-AS1	ZNF460.AS1	0.001376	green	NA
THAP9-AS1	ZNF487	0.000347	green	green
THAP9-AS1	ZNF497	0.001272	green	green
THAP9-AS1	ZNF502	0.000527	green	green
THAP9-AS1	ZNF514	0.005612	green	green
THAP9-AS1	ZNF528	0.001323	green	green
THAP9-AS1	ZNF540	0.000662	green	green
THAP9-AS1	ZNF547	0.001641	green	green
THAP9-AS1	ZNF558	0.003869	green	green
THAP9-AS1	ZNF559	0.001991	green	green
THAP9-AS1	ZNF559.ZNF177	0.00158	green	NA
THAP9-AS1	ZNF563	0.000543	green	green
THAP9-AS1	ZNF596	0.00179	green	green
THAP9-AS1	ZNF621	0.005377	green	green
THAP9-AS1	ZNF630	0.001457	green	green
THAP9-AS1	ZNF662	0.000176	green	green
THAP9-AS1	ZNF671	1.13e-05	green	green
THAP9-AS1	ZNF700	0.008468	green	green
THAP9-AS1	ZNF709	0.000449	green	green
THAP9-AS1	ZNF76	0.004223	green	green
THAP9-AS1	ZNF767P	0.014918	green	green
THAP9-AS1	ZNF774	0.001002	green	green
THAP9-AS1	ZNF783	0.002002	green	green
THAP9-AS1	ZNF786	0.004272	green	green
THAP9-AS1	ZNF789	0.008697	green	green
THAP9-AS1	ZNF814	0.001484	green	green
THAP9-AS1	ZNF83	0.004887	green	green
THAP9-AS1	ZNF839	0.003217	green	green
THAP9-AS1	ZNF841	0.000867	green	green
THAP9-AS1	ZNF862	0.004499	green	green
THAP9-AS1	ZRANB2	0.014788	green	green
THAP9-AS1	ZSCAN30	0.003659	green	green
THAP9-AS1	ZSWIM8.AS1	0.000385	green	NA

## Sheet: BRCA_normal
gene1	gene2	correlation	module1	module2
THAP9-AS1	AAK1	0.112476	turquoise	turquoise
THAP9-AS1	AASDH	0.317189	turquoise	turquoise
THAP9-AS1	AASDHPPT	0.284131	turquoise	turquoise
THAP9-AS1	AASS	0.082314	turquoise	turquoise
THAP9-AS1	ABALON	0.035915	turquoise	turquoise
THAP9-AS1	ABCA10	0.121557	turquoise	turquoise
THAP9-AS1	ABCA11P	0.2064	turquoise	turquoise
THAP9-AS1	ABCA2	0.036705	turquoise	turquoise
THAP9-AS1	ABCB10	0.159876	turquoise	turquoise
THAP9-AS1	ABCB7	0.137215	turquoise	turquoise
THAP9-AS1	ABCE1	0.251214	turquoise	turquoise
THAP9-AS1	ABCG2	0.14585	turquoise	turquoise
THAP9-AS1	ABHD10	0.196032	turquoise	turquoise
THAP9-AS1	ABHD13	0.22825	turquoise	turquoise
THAP9-AS1	ABHD17B	0.223612	turquoise	turquoise
THAP9-AS1	ABHD18	0.160523	turquoise	turquoise
THAP9-AS1	ABHD2	0.153654	turquoise	turquoise
THAP9-AS1	ABI1	0.339102	turquoise	turquoise
THAP9-AS1	ABITRAM	0.271346	turquoise	turquoise
THAP9-AS1	ABL2	0.142186	turquoise	turquoise
THAP9-AS1	ABO	0.140843	turquoise	turquoise
THAP9-AS1	ABRAXAS1	0.201877	turquoise	turquoise
THAP9-AS1	ABRAXAS2	0.252423	turquoise	turquoise
THAP9-AS1	ACAD8	0.124531	turquoise	turquoise
THAP9-AS1	ACAP2	0.205935	turquoise	turquoise
THAP9-AS1	ACBD3	0.276005	turquoise	turquoise
THAP9-AS1	ACBD3.AS1	0.188841	turquoise	NA
THAP9-AS1	ACBD5	0.097194	turquoise	turquoise
THAP9-AS1	ACOXL.AS1	0.133735	turquoise	NA
THAP9-AS1	ACP1	0.195158	turquoise	turquoise
THAP9-AS1	ACSM4	0.152627	turquoise	turquoise
THAP9-AS1	ACTL6A	0.222512	turquoise	turquoise
THAP9-AS1	ACTR2	0.131287	turquoise	turquoise
THAP9-AS1	ACTR6	0.215079	turquoise	turquoise
THAP9-AS1	ACTR8	0.197023	turquoise	turquoise
THAP9-AS1	ACVR1	0.137389	turquoise	turquoise
THAP9-AS1	ACVR1B	0.157504	turquoise	turquoise
THAP9-AS1	ACVR2A	0.190849	turquoise	turquoise
THAP9-AS1	ACVR2B	0.145321	turquoise	turquoise
THAP9-AS1	ACYP1	0.187942	turquoise	turquoise
THAP9-AS1	ADAM10	0.198015	turquoise	turquoise
THAP9-AS1	ADAM17	0.165641	turquoise	turquoise
THAP9-AS1	ADAM1B	0.182119	turquoise	turquoise
THAP9-AS1	ADAM21	0.113985	turquoise	turquoise
THAP9-AS1	ADAM32	0.184946	turquoise	turquoise
THAP9-AS1	ADAM9	0.108225	turquoise	turquoise
THAP9-AS1	ADAMTS5	0.087275	turquoise	turquoise
THAP9-AS1	ADAR	0.160309	turquoise	turquoise
THAP9-AS1	ADAT1	0.146785	turquoise	turquoise
THAP9-AS1	ADGRA3	0.163372	turquoise	turquoise
THAP9-AS1	ADGRG6	0.16966	turquoise	turquoise
THAP9-AS1	ADGRL2	0.113416	turquoise	turquoise
THAP9-AS1	ADH6	0.167894	turquoise	turquoise
THAP9-AS1	ADNP	0.314232	turquoise	turquoise
THAP9-AS1	ADNP.AS1	0.181754	turquoise	NA
THAP9-AS1	ADNP2	0.242931	turquoise	turquoise
THAP9-AS1	ADO	0.182744	turquoise	turquoise
THAP9-AS1	ADPGK	0.174479	turquoise	turquoise
THAP9-AS1	ADPRM	0.201767	turquoise	turquoise
THAP9-AS1	ADSS2	0.240441	turquoise	turquoise
THAP9-AS1	AEBP2	0.245894	turquoise	turquoise
THAP9-AS1	AFAP1	0.138552	turquoise	turquoise
THAP9-AS1	AFDN	0.201776	turquoise	turquoise
THAP9-AS1	AFF1	0.088698	turquoise	turquoise
THAP9-AS1	AFF4	0.228338	turquoise	turquoise
THAP9-AS1	AFG1L	0.120496	turquoise	turquoise
THAP9-AS1	AFTPH	0.3048	turquoise	turquoise
THAP9-AS1	AGAP1	0.157315	turquoise	turquoise
THAP9-AS1	AGBL3	0.173241	turquoise	turquoise
THAP9-AS1	AGBL4	0.129333	turquoise	turquoise
THAP9-AS1	AGGF1	0.245733	turquoise	turquoise
THAP9-AS1	AGK	0.24908	turquoise	turquoise
THAP9-AS1	AGO1	0.230143	turquoise	turquoise
THAP9-AS1	AGO2	0.125963	turquoise	turquoise
THAP9-AS1	AGO3	0.236848	turquoise	turquoise
THAP9-AS1	AGO4	0.236377	turquoise	turquoise
THAP9-AS1	AGPAT5	0.175484	turquoise	turquoise
THAP9-AS1	AGTPBP1	0.089978	turquoise	turquoise
THAP9-AS1	AHCTF1	0.210835	turquoise	turquoise
THAP9-AS1	AHCYL1	0.091078	turquoise	turquoise
THAP9-AS1	AHCYL2	0.110804	turquoise	turquoise
THAP9-AS1	AHI1	0.249487	turquoise	turquoise
THAP9-AS1	AHR	0.182868	turquoise	turquoise
THAP9-AS1	AIMP1	0.266227	turquoise	turquoise
THAP9-AS1	AK4	0.088178	turquoise	turquoise
THAP9-AS1	AK9	0.267261	turquoise	turquoise
THAP9-AS1	AKAP10	0.264423	turquoise	turquoise
THAP9-AS1	AKAP11	0.121621	turquoise	turquoise
THAP9-AS1	AKAP13	0.154994	turquoise	turquoise
THAP9-AS1	AKAP7	0.087569	turquoise	turquoise
THAP9-AS1	AKAP9	0.160066	turquoise	turquoise
THAP9-AS1	AKIRIN1	0.1468	turquoise	turquoise
THAP9-AS1	AKR1E2	0.116505	turquoise	turquoise
THAP9-AS1	ALG10	0.219715	turquoise	turquoise
THAP9-AS1	ALG10B	0.230056	turquoise	turquoise
THAP9-AS1	ALG11	0.169477	turquoise	turquoise
THAP9-AS1	ALG13	0.30887	turquoise	turquoise
THAP9-AS1	ALG2	0.183403	turquoise	turquoise
THAP9-AS1	ALG6	0.235011	turquoise	turquoise
THAP9-AS1	ALKBH1	0.181186	turquoise	turquoise
THAP9-AS1	ALKBH3.AS1	0.146774	turquoise	NA
THAP9-AS1	ALKBH8	0.265444	turquoise	turquoise
THAP9-AS1	ALMS1	0.19584	turquoise	turquoise
THAP9-AS1	ALMS1.IT1	0.188642	turquoise	NA
THAP9-AS1	ALOX12.AS1	0.164785	turquoise	NA
THAP9-AS1	ALPK1	0.170574	turquoise	turquoise
THAP9-AS1	ALS2	0.231752	turquoise	turquoise
THAP9-AS1	AMACR	0.058367	turquoise	turquoise
THAP9-AS1	AMD1	0.19603	turquoise	turquoise
THAP9-AS1	AMER1	0.142264	turquoise	turquoise
THAP9-AS1	AMIGO1	0.094521	turquoise	turquoise
THAP9-AS1	AMMECR1	0.171805	turquoise	turquoise
THAP9-AS1	AMMECR1L	0.21323	turquoise	turquoise
THAP9-AS1	AMN1	0.181984	turquoise	turquoise
THAP9-AS1	AMOTL1	0.109976	turquoise	turquoise
THAP9-AS1	AMZ2P1	0.150628	turquoise	turquoise
THAP9-AS1	ANAPC1	0.205545	turquoise	turquoise
THAP9-AS1	ANAPC4	0.338327	turquoise	turquoise
THAP9-AS1	ANAPC5	0.1628	turquoise	turquoise
THAP9-AS1	ANGEL1	0.166766	turquoise	turquoise
THAP9-AS1	ANGEL2	0.343809	turquoise	turquoise
THAP9-AS1	ANKEF1	0.138159	turquoise	turquoise
THAP9-AS1	ANKFY1	0.150749	turquoise	turquoise
THAP9-AS1	ANKHD1.EIF4EBP3	0.177625	turquoise	NA
THAP9-AS1	ANKIB1	0.178099	turquoise	turquoise
THAP9-AS1	ANKLE2	0.149373	turquoise	turquoise
THAP9-AS1	ANKMY2	0.178637	turquoise	turquoise
THAP9-AS1	ANKRA2	0.235816	turquoise	turquoise
THAP9-AS1	ANKRD10	0.202401	turquoise	turquoise
THAP9-AS1	ANKRD12	0.23093	turquoise	turquoise
THAP9-AS1	ANKRD13A	0.186404	turquoise	turquoise
THAP9-AS1	ANKRD13C	0.238864	turquoise	turquoise
THAP9-AS1	ANKRD17	0.215051	turquoise	turquoise
THAP9-AS1	ANKRD18EP	0.233428	turquoise	turquoise
THAP9-AS1	ANKRD26	0.186024	turquoise	turquoise
THAP9-AS1	ANKRD27	0.167204	turquoise	turquoise
THAP9-AS1	ANKRD28	0.244267	turquoise	turquoise
THAP9-AS1	ANKRD31	0.176274	turquoise	turquoise
THAP9-AS1	ANKRD36C	0.187397	turquoise	turquoise
THAP9-AS1	ANKRD49	0.213368	turquoise	turquoise
THAP9-AS1	ANKRD50	0.165844	turquoise	turquoise
THAP9-AS1	ANKRD52	0.125267	turquoise	turquoise
THAP9-AS1	ANKRD6	0.166075	turquoise	turquoise
THAP9-AS1	ANOS1	0.103429	turquoise	turquoise
THAP9-AS1	ANP32E	0.17958	turquoise	turquoise
THAP9-AS1	ANXA3	0.166649	turquoise	turquoise
THAP9-AS1	AP1AR	0.256455	turquoise	turquoise
THAP9-AS1	AP1G1	0.256057	turquoise	turquoise
THAP9-AS1	AP2B1	0.155446	turquoise	turquoise
THAP9-AS1	AP3B1	0.166988	turquoise	turquoise
THAP9-AS1	AP3M1	0.139672	turquoise	turquoise
THAP9-AS1	AP3M2	0.230352	turquoise	turquoise
THAP9-AS1	AP4B1	0.162849	turquoise	turquoise
THAP9-AS1	AP4E1	0.146919	turquoise	turquoise
THAP9-AS1	AP4S1	0.19557	turquoise	turquoise
THAP9-AS1	AP5B1	0.03338	turquoise	turquoise
THAP9-AS1	AP5M1	0.264754	turquoise	turquoise
THAP9-AS1	APAF1	0.231378	turquoise	turquoise
THAP9-AS1	APC	0.146047	turquoise	turquoise
THAP9-AS1	APH1B	0.170152	turquoise	turquoise
THAP9-AS1	API5	0.374589	turquoise	turquoise
THAP9-AS1	APLF	0.17738	turquoise	turquoise
THAP9-AS1	APOOL	0.109021	turquoise	turquoise
THAP9-AS1	APPBP2	0.177599	turquoise	turquoise
THAP9-AS1	APPL1	0.311933	turquoise	turquoise
THAP9-AS1	APPL2	0.166321	turquoise	turquoise
THAP9-AS1	AQP11	0.130355	turquoise	turquoise
THAP9-AS1	AQR	0.280147	turquoise	turquoise
THAP9-AS1	ARAP2	0.18836	turquoise	turquoise
THAP9-AS1	ARCN1	0.137375	turquoise	turquoise
THAP9-AS1	AREL1	0.209468	turquoise	turquoise
THAP9-AS1	ARF6	0.191564	turquoise	turquoise
THAP9-AS1	ARFGAP3	0.184307	turquoise	turquoise
THAP9-AS1	ARFGEF1	0.195545	turquoise	turquoise
THAP9-AS1	ARFGEF2	0.206095	turquoise	turquoise
THAP9-AS1	ARFIP1	0.293702	turquoise	turquoise
THAP9-AS1	ARG1	0.189508	turquoise	turquoise
THAP9-AS1	ARG2	0.138665	turquoise	turquoise
THAP9-AS1	ARGLU1	0.181914	turquoise	turquoise
THAP9-AS1	ARHGAP12	0.303258	turquoise	turquoise
THAP9-AS1	ARHGAP26	0.164479	turquoise	turquoise
THAP9-AS1	ARHGAP29	0.129785	turquoise	turquoise
THAP9-AS1	ARHGAP35	0.131343	turquoise	turquoise
THAP9-AS1	ARHGAP5	0.272979	turquoise	turquoise
THAP9-AS1	ARHGEF11	0.104475	turquoise	turquoise
THAP9-AS1	ARHGEF12	0.207066	turquoise	turquoise
THAP9-AS1	ARHGEF26	0.11242	turquoise	turquoise
THAP9-AS1	ARHGEF28	0.160883	turquoise	turquoise
THAP9-AS1	ARHGEF3	0.170478	turquoise	turquoise
THAP9-AS1	ARHGEF9	0.163152	turquoise	turquoise
THAP9-AS1	ARID1A	0.165012	turquoise	turquoise
THAP9-AS1	ARID1B	0.195237	turquoise	turquoise
THAP9-AS1	ARID2	0.243514	turquoise	turquoise
THAP9-AS1	ARID4A	0.168166	turquoise	turquoise
THAP9-AS1	ARID4B	0.296835	turquoise	turquoise
THAP9-AS1	ARID5B	0.143676	turquoise	turquoise
THAP9-AS1	ARIH1	0.290149	turquoise	turquoise
THAP9-AS1	ARIH2	0.11623	turquoise	turquoise
THAP9-AS1	ARL1	0.182587	turquoise	turquoise
THAP9-AS1	ARL10	0.159734	turquoise	turquoise
THAP9-AS1	ARL13A	0.168025	turquoise	turquoise
THAP9-AS1	ARL13B	0.17947	turquoise	turquoise
THAP9-AS1	ARL14EP	0.236106	turquoise	turquoise
THAP9-AS1	ARL17A	0.167927	turquoise	turquoise
THAP9-AS1	ARL4C	0.192166	turquoise	turquoise
THAP9-AS1	ARL5A	0.139752	turquoise	turquoise
THAP9-AS1	ARL5B	0.161465	turquoise	turquoise
THAP9-AS1	ARL6	0.242613	turquoise	turquoise
THAP9-AS1	ARL6IP6	0.194512	turquoise	turquoise
THAP9-AS1	ARL8B	0.155526	turquoise	turquoise
THAP9-AS1	ARMC1	0.165635	turquoise	turquoise
THAP9-AS1	ARMC10	0.170031	turquoise	turquoise
THAP9-AS1	ARMC2	0.150448	turquoise	turquoise
THAP9-AS1	ARMC8	0.133138	turquoise	turquoise
THAP9-AS1	ARMCX3	0.144638	turquoise	turquoise
THAP9-AS1	ARMH3	0.159786	turquoise	turquoise
THAP9-AS1	ARMH4	0.096984	turquoise	turquoise
THAP9-AS1	ARNT	0.097315	turquoise	turquoise
THAP9-AS1	ARNTL	0.150785	turquoise	turquoise
THAP9-AS1	ARNTL2.AS1	0.010591	turquoise	NA
THAP9-AS1	ARPP19	0.095674	turquoise	turquoise
THAP9-AS1	ARRB1	0.041614	turquoise	turquoise
THAP9-AS1	ARRDC4	0.161213	turquoise	turquoise
THAP9-AS1	ARSK	0.16597	turquoise	turquoise
THAP9-AS1	ASAH2	0.155502	turquoise	turquoise
THAP9-AS1	ASAH2B	0.180373	turquoise	turquoise
THAP9-AS1	ASB1	0.095018	turquoise	turquoise
THAP9-AS1	ASB16.AS1	0.153329	turquoise	NA
THAP9-AS1	ASB3	0.184902	turquoise	turquoise
THAP9-AS1	ASB7	0.311316	turquoise	turquoise
THAP9-AS1	ASCC1	0.108202	turquoise	turquoise
THAP9-AS1	ASCC3	0.251893	turquoise	turquoise
THAP9-AS1	ASF1A	0.186906	turquoise	turquoise
THAP9-AS1	ASH1L	0.169944	turquoise	turquoise
THAP9-AS1	ASH1L.AS1	0.190832	turquoise	NA
THAP9-AS1	ASH2L	0.112454	turquoise	turquoise
THAP9-AS1	ASNS	0.188194	turquoise	turquoise
THAP9-AS1	ASTE1	0.218216	turquoise	turquoise
THAP9-AS1	ASXL1	0.172381	turquoise	turquoise
THAP9-AS1	ASXL2	0.170832	turquoise	turquoise
THAP9-AS1	ATAD1	0.268284	turquoise	turquoise
THAP9-AS1	ATAD2B	0.239442	turquoise	turquoise
THAP9-AS1	ATAD5	0.188869	turquoise	turquoise
THAP9-AS1	ATE1	0.168175	turquoise	turquoise
THAP9-AS1	ATE1.AS1	0.124885	turquoise	NA
THAP9-AS1	ATF1	0.243364	turquoise	turquoise
THAP9-AS1	ATF2	0.232677	turquoise	turquoise
THAP9-AS1	ATF6	0.285575	turquoise	turquoise
THAP9-AS1	ATF7	0.140667	turquoise	turquoise
THAP9-AS1	ATF7IP	0.221584	turquoise	turquoise
THAP9-AS1	ATF7IP2	0.167611	turquoise	turquoise
THAP9-AS1	ATG10	0.156392	turquoise	turquoise
THAP9-AS1	ATG12	0.120848	turquoise	turquoise
THAP9-AS1	ATG14	0.203456	turquoise	turquoise
THAP9-AS1	ATG2B	0.278703	turquoise	turquoise
THAP9-AS1	ATM	0.180374	turquoise	turquoise
THAP9-AS1	ATMIN	0.172805	turquoise	turquoise
THAP9-AS1	ATP10D	0.159907	turquoise	turquoise
THAP9-AS1	ATP11A	0.103883	turquoise	turquoise
THAP9-AS1	ATP11B	0.145116	turquoise	turquoise
THAP9-AS1	ATP11C	0.128833	turquoise	turquoise
THAP9-AS1	ATP13A3	0.10317	turquoise	turquoise
THAP9-AS1	ATP1A4	0.110062	turquoise	turquoise
THAP9-AS1	ATP2B1	0.175856	turquoise	turquoise
THAP9-AS1	ATP2B1.AS1	0.204916	turquoise	NA
THAP9-AS1	ATP2C1	0.202553	turquoise	turquoise
THAP9-AS1	ATP5MF.PTCD1	0.082072	turquoise	NA
THAP9-AS1	ATP6V0A1	0.141642	turquoise	turquoise
THAP9-AS1	ATP6V0A2	0.171331	turquoise	turquoise
THAP9-AS1	ATP6V1A	0.228093	turquoise	turquoise
THAP9-AS1	ATP6V1C1	0.15034	turquoise	turquoise
THAP9-AS1	ATP6V1E2	0.145056	turquoise	turquoise
THAP9-AS1	ATP8A2P2	0.160576	turquoise	turquoise
THAP9-AS1	ATP9B	0.156181	turquoise	turquoise
THAP9-AS1	ATR	0.241649	turquoise	turquoise
THAP9-AS1	ATRN	0.22753	turquoise	turquoise
THAP9-AS1	ATRX	0.243411	turquoise	turquoise
THAP9-AS1	ATXN1	0.135716	turquoise	turquoise
THAP9-AS1	ATXN1L	0.091032	turquoise	turquoise
THAP9-AS1	ATXN2	0.12502	turquoise	turquoise
THAP9-AS1	ATXN3	0.213321	turquoise	turquoise
THAP9-AS1	ATXN7	0.291247	turquoise	turquoise
THAP9-AS1	ATXN7L1	0.16427	turquoise	turquoise
THAP9-AS1	ATXN7L3B	0.171087	turquoise	turquoise
THAP9-AS1	AUH	0.126175	turquoise	turquoise
THAP9-AS1	AVL9	0.231231	turquoise	turquoise
THAP9-AS1	AXIN2	0.095092	turquoise	turquoise
THAP9-AS1	AZIN1	0.152541	turquoise	turquoise
THAP9-AS1	B3GALNT1	0.183799	turquoise	turquoise
THAP9-AS1	B3GALT2	0.160749	turquoise	turquoise
THAP9-AS1	B3GAT2	0.172996	turquoise	turquoise
THAP9-AS1	B3GLCT	0.18145	turquoise	turquoise
THAP9-AS1	B3GNT2	0.200906	turquoise	turquoise
THAP9-AS1	B4GALT1	0.176685	turquoise	turquoise
THAP9-AS1	BACE1	0.100844	turquoise	turquoise
THAP9-AS1	BACE2	0.170028	turquoise	turquoise
THAP9-AS1	BACH1	0.234186	turquoise	turquoise
THAP9-AS1	BACH2	0.175311	turquoise	turquoise
THAP9-AS1	BAG4	0.101875	turquoise	turquoise
THAP9-AS1	BAG5	0.163986	turquoise	turquoise
THAP9-AS1	BARD1	0.192183	turquoise	turquoise
THAP9-AS1	BAZ1A	0.221437	turquoise	turquoise
THAP9-AS1	BAZ1B	0.122103	turquoise	turquoise
THAP9-AS1	BAZ2A	0.145354	turquoise	turquoise
THAP9-AS1	BAZ2B	0.247869	turquoise	turquoise
THAP9-AS1	BBIP1	0.281084	turquoise	turquoise
THAP9-AS1	BBS10	0.148494	turquoise	turquoise
THAP9-AS1	BBS12	0.173338	turquoise	turquoise
THAP9-AS1	BBS2	0.178496	turquoise	turquoise
THAP9-AS1	BBS4	0.171515	turquoise	turquoise
THAP9-AS1	BBS7	0.196277	turquoise	turquoise
THAP9-AS1	BBS9	0.178224	turquoise	turquoise
THAP9-AS1	BBX	0.262505	turquoise	turquoise
THAP9-AS1	BCAR3	0.08009	turquoise	turquoise
THAP9-AS1	BCAS3	0.128692	turquoise	turquoise
THAP9-AS1	BCDIN3D	0.165311	turquoise	turquoise
THAP9-AS1	BCDIN3D.AS1	0.120643	turquoise	NA
THAP9-AS1	BCKDHB	0.092772	turquoise	turquoise
THAP9-AS1	BCL10	0.195945	turquoise	turquoise
THAP9-AS1	BCL2	0.117709	turquoise	turquoise
THAP9-AS1	BCL2L15	0.173934	turquoise	turquoise
THAP9-AS1	BCL9L	0.064199	turquoise	turquoise
THAP9-AS1	BCLAF1	0.322921	turquoise	turquoise
THAP9-AS1	BCLAF3	0.315078	turquoise	turquoise
THAP9-AS1	BCOR	0.163106	turquoise	turquoise
THAP9-AS1	BCORL1	0.125481	turquoise	turquoise
THAP9-AS1	BDH2	0.185605	turquoise	turquoise
THAP9-AS1	BDNF	0.176988	turquoise	turquoise
THAP9-AS1	BDNF.AS	0.175735	turquoise	NA
THAP9-AS1	BDP1	0.212121	turquoise	turquoise
THAP9-AS1	BEND7	0.197113	turquoise	turquoise
THAP9-AS1	BET1	0.176387	turquoise	turquoise
THAP9-AS1	BET1L	0.155602	turquoise	turquoise
THAP9-AS1	BFAR	0.12916	turquoise	turquoise
THAP9-AS1	BHLHB9	0.183809	turquoise	turquoise
THAP9-AS1	BHLHE40	0.136109	turquoise	turquoise
THAP9-AS1	BHLHE40.AS1	0.177183	turquoise	NA
THAP9-AS1	BICD1	0.169725	turquoise	turquoise
THAP9-AS1	BICRAL	0.264743	turquoise	turquoise
THAP9-AS1	BIRC2	0.305983	turquoise	turquoise
THAP9-AS1	BIRC6	0.231742	turquoise	turquoise
THAP9-AS1	BIVM	0.176595	turquoise	turquoise
THAP9-AS1	BLOC1S5	0.244943	turquoise	turquoise
THAP9-AS1	BLOC1S6	0.185559	turquoise	turquoise
THAP9-AS1	BLZF1	0.239154	turquoise	turquoise
THAP9-AS1	BMF	0.106341	turquoise	turquoise
THAP9-AS1	BMI1	0.184763	turquoise	turquoise
THAP9-AS1	BMPR1A	0.179182	turquoise	turquoise
THAP9-AS1	BMPR1AP1	0.085637	turquoise	turquoise
THAP9-AS1	BMPR2	0.127798	turquoise	turquoise
THAP9-AS1	BMS1	0.148242	turquoise	turquoise
THAP9-AS1	BMT2	0.213317	turquoise	turquoise
THAP9-AS1	BNIP3P16	0.182945	turquoise	turquoise
THAP9-AS1	BNIP3P24	0.169273	turquoise	turquoise
THAP9-AS1	BNIP3P39	0.156059	turquoise	turquoise
THAP9-AS1	BNIP3P40	0.112502	turquoise	turquoise
THAP9-AS1	BOD1L1	0.190792	turquoise	turquoise
THAP9-AS1	BOLA2.SMG1P6	0.147051	turquoise	NA
THAP9-AS1	BOLA3.AS1	0.148964	turquoise	NA
THAP9-AS1	BORA	0.162123	turquoise	turquoise
THAP9-AS1	BPNT1	0.207273	turquoise	turquoise
THAP9-AS1	BPTF	0.249848	turquoise	turquoise
THAP9-AS1	BRAF	0.240178	turquoise	turquoise
THAP9-AS1	BRAP	0.155306	turquoise	turquoise
THAP9-AS1	BRCC3	0.158888	turquoise	turquoise
THAP9-AS1	BRCC3P1	0.12764	turquoise	turquoise
THAP9-AS1	BRD3	0.131295	turquoise	turquoise
THAP9-AS1	BRIX1	0.198676	turquoise	turquoise
THAP9-AS1	BRMS1L	0.162255	turquoise	turquoise
THAP9-AS1	BROX	0.245184	turquoise	turquoise
THAP9-AS1	BRPF3	0.158557	turquoise	turquoise
THAP9-AS1	BRWD1	0.22406	turquoise	turquoise
THAP9-AS1	BRWD3	0.215435	turquoise	turquoise
THAP9-AS1	BSDC1	0.133072	turquoise	turquoise
THAP9-AS1	BTBD10	0.163497	turquoise	turquoise
THAP9-AS1	BTBD18	0.16933	turquoise	turquoise
THAP9-AS1	BTBD3	0.220634	turquoise	turquoise
THAP9-AS1	BTBD7	0.225267	turquoise	turquoise
THAP9-AS1	BTBD8	0.089379	turquoise	turquoise
THAP9-AS1	BTBD9	0.140783	turquoise	turquoise
THAP9-AS1	BTC	0.190667	turquoise	turquoise
THAP9-AS1	BTF3L4	0.176006	turquoise	turquoise
THAP9-AS1	BTG1	0.16238	turquoise	turquoise
THAP9-AS1	BTG3	0.192221	turquoise	turquoise
THAP9-AS1	BTN2A3P	0.175018	turquoise	turquoise
THAP9-AS1	BUB3	0.203752	turquoise	turquoise
THAP9-AS1	BUD13	0.169934	turquoise	turquoise
THAP9-AS1	C10orf88	0.212533	turquoise	turquoise
THAP9-AS1	C11orf54	0.164264	turquoise	turquoise
THAP9-AS1	C11orf58	0.259194	turquoise	turquoise
THAP9-AS1	C11orf65	0.168442	turquoise	turquoise
THAP9-AS1	C11orf71	0.178597	turquoise	turquoise
THAP9-AS1	C12orf29	0.253555	turquoise	turquoise
THAP9-AS1	C12orf4	0.205989	turquoise	turquoise
THAP9-AS1	C12orf66	0.269031	turquoise	turquoise
THAP9-AS1	C12orf71	0.174767	turquoise	turquoise
THAP9-AS1	C12orf73	0.143733	turquoise	turquoise
THAP9-AS1	C12orf76	0.181146	turquoise	turquoise
THAP9-AS1	C14orf28	0.142064	turquoise	turquoise
THAP9-AS1	C15orf40	0.157125	turquoise	turquoise
THAP9-AS1	C16orf70	0.171945	turquoise	turquoise
THAP9-AS1	C16orf72	0.184752	turquoise	turquoise
THAP9-AS1	C17orf75	0.225251	turquoise	turquoise
THAP9-AS1	C17orf80	0.227776	turquoise	turquoise
THAP9-AS1	C18orf25	0.210328	turquoise	turquoise
THAP9-AS1	C18orf32	0.172789	turquoise	turquoise
THAP9-AS1	C18orf54	0.150056	turquoise	turquoise
THAP9-AS1	C19orf54	0.101857	turquoise	turquoise
THAP9-AS1	C1GALT1	0.152346	turquoise	turquoise
THAP9-AS1	C1orf109	0.161825	turquoise	turquoise
THAP9-AS1	C1orf112	0.272292	turquoise	turquoise
THAP9-AS1	C1orf131	0.160632	turquoise	turquoise
THAP9-AS1	C1orf189	0.067163	turquoise	turquoise
THAP9-AS1	C1orf21	0.16384	turquoise	turquoise
THAP9-AS1	C1orf52	0.19071	turquoise	turquoise
THAP9-AS1	C1QL3	0.161762	turquoise	turquoise
THAP9-AS1	C1QTNF7.AS1	0.039117	turquoise	NA
THAP9-AS1	C21orf62	0.12598	turquoise	turquoise
THAP9-AS1	C21orf91	0.181976	turquoise	turquoise
THAP9-AS1	C22orf24	0.135265	turquoise	turquoise
THAP9-AS1	C2CD3	0.184069	turquoise	turquoise
THAP9-AS1	C2CD5	0.304344	turquoise	turquoise
THAP9-AS1	C2orf16	0.15757	turquoise	turquoise
THAP9-AS1	C2orf42	0.175354	turquoise	turquoise
THAP9-AS1	C2orf49	0.212543	turquoise	turquoise
THAP9-AS1	C2orf66	0.120169	turquoise	turquoise
THAP9-AS1	C2orf68	0.152182	turquoise	turquoise
THAP9-AS1	C2orf69	0.140735	turquoise	turquoise
THAP9-AS1	C3orf33	0.196832	turquoise	turquoise
THAP9-AS1	C3orf49	0.176571	turquoise	turquoise
THAP9-AS1	C4orf33	0.183817	turquoise	turquoise
THAP9-AS1	C4orf36	0.193048	turquoise	turquoise
THAP9-AS1	C4orf46	0.236877	turquoise	turquoise
THAP9-AS1	C5	0.130503	turquoise	turquoise
THAP9-AS1	C5orf15	0.219885	turquoise	turquoise
THAP9-AS1	C5orf22	0.238598	turquoise	turquoise
THAP9-AS1	C5orf24	0.239185	turquoise	turquoise
THAP9-AS1	C5orf34	0.197344	turquoise	turquoise
THAP9-AS1	C5orf51	0.294045	turquoise	turquoise
THAP9-AS1	C5orf63	0.16955	turquoise	turquoise
THAP9-AS1	C6orf120	0.087999	turquoise	turquoise
THAP9-AS1	C6orf62	0.157531	turquoise	turquoise
THAP9-AS1	C6orf89	0.109471	turquoise	turquoise
THAP9-AS1	C7orf25	0.128627	turquoise	turquoise
THAP9-AS1	C7orf31	0.167742	turquoise	turquoise
THAP9-AS1	C8orf37	0.178623	turquoise	turquoise
THAP9-AS1	C8orf88	0.176456	turquoise	turquoise
THAP9-AS1	C9orf72	0.15688	turquoise	turquoise
THAP9-AS1	C9orf85	0.168526	turquoise	turquoise
THAP9-AS1	CA13	0.198033	turquoise	turquoise
THAP9-AS1	CA5B	0.149264	turquoise	turquoise
THAP9-AS1	CA5BP1	0.170476	turquoise	turquoise
THAP9-AS1	CAAP1	0.210462	turquoise	turquoise
THAP9-AS1	CAB39L	0.156568	turquoise	turquoise
THAP9-AS1	CACHD1	0.142281	turquoise	turquoise
THAP9-AS1	CACNB2	0.17181	turquoise	turquoise
THAP9-AS1	CACUL1	0.233963	turquoise	turquoise
THAP9-AS1	CAMK2D	0.107548	turquoise	turquoise
THAP9-AS1	CAMSAP1	0.116851	turquoise	turquoise
THAP9-AS1	CAMSAP2	0.198186	turquoise	turquoise
THAP9-AS1	CAMTA1	0.195156	turquoise	turquoise
THAP9-AS1	CAMTA2	0.059177	turquoise	turquoise
THAP9-AS1	CANX	0.230123	turquoise	turquoise
THAP9-AS1	CAP1P1	0.10118	turquoise	turquoise
THAP9-AS1	CAPN7	0.282757	turquoise	turquoise
THAP9-AS1	CAPNS1P1	0.08827	turquoise	turquoise
THAP9-AS1	CAPRIN1	0.242044	turquoise	turquoise
THAP9-AS1	CAPRIN2	0.129933	turquoise	turquoise
THAP9-AS1	CAPS2	0.213463	turquoise	turquoise
THAP9-AS1	CARNMT1	0.248601	turquoise	turquoise
THAP9-AS1	CASC2	0.167333	turquoise	turquoise
THAP9-AS1	CASC3	0.164695	turquoise	turquoise
THAP9-AS1	CASD1	0.184769	turquoise	turquoise
THAP9-AS1	CASK	0.183116	turquoise	turquoise
THAP9-AS1	CASP3	0.168215	turquoise	turquoise
THAP9-AS1	CASP8	0.149981	turquoise	turquoise
THAP9-AS1	CASP8AP2	0.261686	turquoise	turquoise
THAP9-AS1	CATSPER2P1	0.098253	turquoise	turquoise
THAP9-AS1	CATSPERE	0.196802	turquoise	turquoise
THAP9-AS1	CBFA2T2	0.179214	turquoise	turquoise
THAP9-AS1	CBFB	0.211996	turquoise	turquoise
THAP9-AS1	CBL	0.114847	turquoise	turquoise
THAP9-AS1	CBLB	0.124904	turquoise	turquoise
THAP9-AS1	CBLL1	0.173475	turquoise	turquoise
THAP9-AS1	CBR4	0.293738	turquoise	turquoise
THAP9-AS1	CBWD1	0.181213	turquoise	turquoise
THAP9-AS1	CBWD2	0.191297	turquoise	turquoise
THAP9-AS1	CBX1	0.149698	turquoise	turquoise
THAP9-AS1	CBX3	0.225235	turquoise	turquoise
THAP9-AS1	CBX3P2	0.198026	turquoise	turquoise
THAP9-AS1	CBX5	0.235339	turquoise	turquoise
THAP9-AS1	CC2D1B	0.097166	turquoise	turquoise
THAP9-AS1	CC2D2A	0.134508	turquoise	turquoise
THAP9-AS1	CC2D2B	0.189533	turquoise	turquoise
THAP9-AS1	CCAR1	0.263705	turquoise	turquoise
THAP9-AS1	CCDC112	0.200567	turquoise	turquoise
THAP9-AS1	CCDC113	0.163963	turquoise	turquoise
THAP9-AS1	CCDC117	0.120455	turquoise	turquoise
THAP9-AS1	CCDC121	0.152673	turquoise	turquoise
THAP9-AS1	CCDC122	0.197246	turquoise	turquoise
THAP9-AS1	CCDC126	0.187201	turquoise	turquoise
THAP9-AS1	CCDC13.AS1	0.181082	turquoise	NA
THAP9-AS1	CCDC146	0.131506	turquoise	turquoise
THAP9-AS1	CCDC158	0.126951	turquoise	turquoise
THAP9-AS1	CCDC17	0.076667	turquoise	turquoise
THAP9-AS1	CCDC170	0.104531	turquoise	turquoise
THAP9-AS1	CCDC173	0.159627	turquoise	turquoise
THAP9-AS1	CCDC174	0.154477	turquoise	turquoise
THAP9-AS1	CCDC18	0.101453	turquoise	turquoise
THAP9-AS1	CCDC186	0.236611	turquoise	turquoise
THAP9-AS1	CCDC192	0.178554	turquoise	turquoise
THAP9-AS1	CCDC25	0.205588	turquoise	turquoise
THAP9-AS1	CCDC28A.AS1	0.184123	turquoise	NA
THAP9-AS1	CCDC32	0.137228	turquoise	turquoise
THAP9-AS1	CCDC47	0.18667	turquoise	turquoise
THAP9-AS1	CCDC59	0.186844	turquoise	turquoise
THAP9-AS1	CCDC6	0.192343	turquoise	turquoise
THAP9-AS1	CCDC62	0.174616	turquoise	turquoise
THAP9-AS1	CCDC65	0.173047	turquoise	turquoise
THAP9-AS1	CCDC66	0.185848	turquoise	turquoise
THAP9-AS1	CCDC7	0.168869	turquoise	turquoise
THAP9-AS1	CCDC77	0.159766	turquoise	turquoise
THAP9-AS1	CCDC82	0.125447	turquoise	turquoise
THAP9-AS1	CCDC91	0.20311	turquoise	turquoise
THAP9-AS1	CCDC93	0.137896	turquoise	turquoise
THAP9-AS1	CCN2	0.108776	turquoise	turquoise
THAP9-AS1	CCNB3	0.063741	turquoise	turquoise
THAP9-AS1	CCNC	0.177941	turquoise	turquoise
THAP9-AS1	CCNG1	0.145702	turquoise	turquoise
THAP9-AS1	CCNG2	0.170346	turquoise	turquoise
THAP9-AS1	CCNI	0.183991	turquoise	turquoise
THAP9-AS1	CCNJ	0.239627	turquoise	turquoise
THAP9-AS1	CCNK	0.222711	turquoise	turquoise
THAP9-AS1	CCNL1	0.189125	turquoise	turquoise
THAP9-AS1	CCNT1	0.329079	turquoise	turquoise
THAP9-AS1	CCNT2	0.300041	turquoise	turquoise
THAP9-AS1	CCNYL2	0.147636	turquoise	turquoise
THAP9-AS1	CCNYL6	0.174262	turquoise	turquoise
THAP9-AS1	CCP110	0.279537	turquoise	turquoise
THAP9-AS1	CCSAP	0.197275	turquoise	turquoise
THAP9-AS1	CCSER2	0.105989	turquoise	turquoise
THAP9-AS1	CCT6B	0.187891	turquoise	turquoise
THAP9-AS1	CCZ1B	0.153278	turquoise	turquoise
THAP9-AS1	CD160	0.178449	turquoise	turquoise
THAP9-AS1	CD164	0.101638	turquoise	turquoise
THAP9-AS1	CD200	0.184283	turquoise	turquoise
THAP9-AS1	CD274	0.162069	turquoise	turquoise
THAP9-AS1	CD2AP	0.297716	turquoise	turquoise
THAP9-AS1	CD46	0.17506	turquoise	turquoise
THAP9-AS1	CD47	0.225452	turquoise	turquoise
THAP9-AS1	CD99P1	0.1619	turquoise	turquoise
THAP9-AS1	CDADC1	0.104683	turquoise	turquoise
THAP9-AS1	CDC16	0.149154	turquoise	turquoise
THAP9-AS1	CDC23	0.348073	turquoise	turquoise
THAP9-AS1	CDC27	0.118178	turquoise	turquoise
THAP9-AS1	CDC40	0.29876	turquoise	turquoise
THAP9-AS1	CDC42EP3	0.182676	turquoise	turquoise
THAP9-AS1	CDC42SE1	0.167393	turquoise	turquoise
THAP9-AS1	CDC42SE2	0.230104	turquoise	turquoise
THAP9-AS1	CDC5L	0.287678	turquoise	turquoise
THAP9-AS1	CDC73	0.165238	turquoise	turquoise
THAP9-AS1	CDIN1	0.174977	turquoise	turquoise
THAP9-AS1	CDK12	0.237457	turquoise	turquoise
THAP9-AS1	CDK13	0.354682	turquoise	turquoise
THAP9-AS1	CDK14	0.168035	turquoise	turquoise
THAP9-AS1	CDK17	0.265169	turquoise	turquoise
THAP9-AS1	CDK19	0.206712	turquoise	turquoise
THAP9-AS1	CDK2	0.181968	turquoise	turquoise
THAP9-AS1	CDK5RAP1	0.150976	turquoise	turquoise
THAP9-AS1	CDK6	0.168537	turquoise	turquoise
THAP9-AS1	CDK7	0.188587	turquoise	turquoise
THAP9-AS1	CDKAL1	0.193087	turquoise	turquoise
THAP9-AS1	CDKL3	0.170031	turquoise	turquoise
THAP9-AS1	CDKL5	0.167417	turquoise	turquoise
THAP9-AS1	CDKN1B	0.159163	turquoise	turquoise
THAP9-AS1	CDKN2AIP	0.237844	turquoise	turquoise
THAP9-AS1	CDKN2B.AS1	0.149189	turquoise	NA
THAP9-AS1	CDR2	0.153243	turquoise	turquoise
THAP9-AS1	CDS2	0.119701	turquoise	turquoise
THAP9-AS1	CDYL	0.221425	turquoise	turquoise
THAP9-AS1	CEBPZ	0.222691	turquoise	turquoise
THAP9-AS1	CEBPZOS	0.170266	turquoise	turquoise
THAP9-AS1	CELF1	0.239544	turquoise	turquoise
THAP9-AS1	CELF4	0.147127	turquoise	turquoise
THAP9-AS1	CEMIP2	0.12101	turquoise	turquoise
THAP9-AS1	CENPC	0.30795	turquoise	turquoise
THAP9-AS1	CENPCP1	0.176767	turquoise	turquoise
THAP9-AS1	CENPH	0.194911	turquoise	turquoise
THAP9-AS1	CENPJ	0.194043	turquoise	turquoise
THAP9-AS1	CENPL	0.14431	turquoise	turquoise
THAP9-AS1	CENPP	0.150297	turquoise	turquoise
THAP9-AS1	CENPQ	0.161446	turquoise	turquoise
THAP9-AS1	CEP104	0.122543	turquoise	turquoise
THAP9-AS1	CEP120	0.25131	turquoise	turquoise
THAP9-AS1	CEP135	0.256032	turquoise	turquoise
THAP9-AS1	CEP152	0.124954	turquoise	turquoise
THAP9-AS1	CEP162	0.242529	turquoise	turquoise
THAP9-AS1	CEP170	0.128886	turquoise	turquoise
THAP9-AS1	CEP19	0.099192	turquoise	turquoise
THAP9-AS1	CEP192	0.203468	turquoise	turquoise
THAP9-AS1	CEP20	0.177974	turquoise	turquoise
THAP9-AS1	CEP290	0.213689	turquoise	turquoise
THAP9-AS1	CEP295	0.172932	turquoise	turquoise
THAP9-AS1	CEP350	0.16373	turquoise	turquoise
THAP9-AS1	CEP41	0.169218	turquoise	turquoise
THAP9-AS1	CEP44	0.316904	turquoise	turquoise
THAP9-AS1	CEP57	0.286257	turquoise	turquoise
THAP9-AS1	CEP57L1	0.118964	turquoise	turquoise
THAP9-AS1	CEP63	0.105243	turquoise	turquoise
THAP9-AS1	CEP68	0.115809	turquoise	turquoise
THAP9-AS1	CEP76	0.245009	turquoise	turquoise
THAP9-AS1	CEP78	0.303987	turquoise	turquoise
THAP9-AS1	CEP83	0.254175	turquoise	turquoise
THAP9-AS1	CEP85L	0.127831	turquoise	turquoise
THAP9-AS1	CEP97	0.251483	turquoise	turquoise
THAP9-AS1	CEPT1	0.116612	turquoise	turquoise
THAP9-AS1	CES2	0.055717	turquoise	turquoise
THAP9-AS1	CFAP206	0.204266	turquoise	turquoise
THAP9-AS1	CFAP251	0.153524	turquoise	turquoise
THAP9-AS1	CFAP44.AS1	0.160282	turquoise	NA
THAP9-AS1	CFAP54	0.175949	turquoise	turquoise
THAP9-AS1	CFAP58	0.084821	turquoise	turquoise
THAP9-AS1	CFAP69	0.179007	turquoise	turquoise
THAP9-AS1	CFAP97	0.3166	turquoise	turquoise
THAP9-AS1	CGGBP1	0.264634	turquoise	turquoise
THAP9-AS1	CHAMP1	0.254576	turquoise	turquoise
THAP9-AS1	CHD1	0.184063	turquoise	turquoise
THAP9-AS1	CHD4	0.137051	turquoise	turquoise
THAP9-AS1	CHD6	0.165524	turquoise	turquoise
THAP9-AS1	CHD7	0.155275	turquoise	turquoise
THAP9-AS1	CHD8	0.195135	turquoise	turquoise
THAP9-AS1	CHD9	0.210036	turquoise	turquoise
THAP9-AS1	CHIC1	0.247118	turquoise	turquoise
THAP9-AS1	CHIC2	0.198448	turquoise	turquoise
THAP9-AS1	CHL1.AS1	0.070975	turquoise	NA
THAP9-AS1	CHM	0.198729	turquoise	turquoise
THAP9-AS1	CHML	0.210803	turquoise	turquoise
THAP9-AS1	CHMP1B	0.169461	turquoise	turquoise
THAP9-AS1	CHMP2B	0.1698	turquoise	turquoise
THAP9-AS1	CHMP4A	0.178887	turquoise	turquoise
THAP9-AS1	CHODL	0.053705	turquoise	turquoise
THAP9-AS1	CHORDC1	0.181509	turquoise	turquoise
THAP9-AS1	CHP1P2	0.126204	turquoise	turquoise
THAP9-AS1	CHROMR	0.178692	turquoise	turquoise
THAP9-AS1	CHST15	0.14421	turquoise	turquoise
THAP9-AS1	CHSY1	0.180067	turquoise	turquoise
THAP9-AS1	CHTOP	0.176305	turquoise	turquoise
THAP9-AS1	CHUK	0.149536	turquoise	turquoise
THAP9-AS1	CIAO1	0.131789	turquoise	turquoise
THAP9-AS1	CIART	0.135091	turquoise	turquoise
THAP9-AS1	CILK1	0.196474	turquoise	turquoise
THAP9-AS1	CKAP5	0.137481	turquoise	turquoise
THAP9-AS1	CLASP1	0.096426	turquoise	turquoise
THAP9-AS1	CLASP2	0.151461	turquoise	turquoise
THAP9-AS1	CLCC1	0.106027	turquoise	turquoise
THAP9-AS1	CLCN3	0.282186	turquoise	turquoise
THAP9-AS1	CLCN6	0.10311	turquoise	turquoise
THAP9-AS1	CLDND1	0.163879	turquoise	turquoise
THAP9-AS1	CLIC6	0.129159	turquoise	turquoise
THAP9-AS1	CLINT1	0.172598	turquoise	turquoise
THAP9-AS1	CLK1	0.183999	turquoise	turquoise
THAP9-AS1	CLMN	0.14274	turquoise	turquoise
THAP9-AS1	CLOCK	0.135475	turquoise	turquoise
THAP9-AS1	CLPB	0.057086	turquoise	turquoise
THAP9-AS1	CLPX	0.197374	turquoise	turquoise
THAP9-AS1	CLTC	0.112903	turquoise	turquoise
THAP9-AS1	CLTRN	0.204023	turquoise	turquoise
THAP9-AS1	CLUAP1	0.145203	turquoise	turquoise
THAP9-AS1	CMAHP	0.161474	turquoise	turquoise
THAP9-AS1	CMAS	0.182854	turquoise	turquoise
THAP9-AS1	CMPK1	0.141439	turquoise	turquoise
THAP9-AS1	CMTM1	0.114234	turquoise	turquoise
THAP9-AS1	CMTM6	0.188123	turquoise	turquoise
THAP9-AS1	CMTR1	0.12226	turquoise	turquoise
THAP9-AS1	CMTR2	0.248357	turquoise	turquoise
THAP9-AS1	CNKSR3	0.176504	turquoise	turquoise
THAP9-AS1	CNNM2	0.156264	turquoise	turquoise
THAP9-AS1	CNNM3.DT	0.203887	turquoise	NA
THAP9-AS1	CNOT1	0.208582	turquoise	turquoise
THAP9-AS1	CNOT10	0.241284	turquoise	turquoise
THAP9-AS1	CNOT4	0.145582	turquoise	turquoise
THAP9-AS1	CNOT6	0.277596	turquoise	turquoise
THAP9-AS1	CNOT6L	0.314355	turquoise	turquoise
THAP9-AS1	CNOT7	0.294429	turquoise	turquoise
THAP9-AS1	CNOT8	0.175964	turquoise	turquoise
THAP9-AS1	CNOT9	0.219935	turquoise	turquoise
THAP9-AS1	CNST	0.162495	turquoise	turquoise
THAP9-AS1	CNTLN	0.143013	turquoise	turquoise
THAP9-AS1	CNTN3	0.106234	turquoise	turquoise
THAP9-AS1	CNTNAP3	0.17164	turquoise	turquoise
THAP9-AS1	CNTRL	0.162501	turquoise	turquoise
THAP9-AS1	COA1	0.178465	turquoise	turquoise
THAP9-AS1	COA7	0.163352	turquoise	turquoise
THAP9-AS1	COG1	0.129383	turquoise	turquoise
THAP9-AS1	COG2	0.200942	turquoise	turquoise
THAP9-AS1	COG3	0.200881	turquoise	turquoise
THAP9-AS1	COG5	0.226994	turquoise	turquoise
THAP9-AS1	COG6	0.299641	turquoise	turquoise
THAP9-AS1	COIL	0.320441	turquoise	turquoise
THAP9-AS1	COLCA2	0.159657	turquoise	turquoise
THAP9-AS1	COLEC10	0.076155	turquoise	turquoise
THAP9-AS1	COMMD10	0.150851	turquoise	turquoise
THAP9-AS1	COMMD2	0.273228	turquoise	turquoise
THAP9-AS1	COPA	0.113273	turquoise	turquoise
THAP9-AS1	COPB1	0.245781	turquoise	turquoise
THAP9-AS1	COPB2	0.130566	turquoise	turquoise
THAP9-AS1	COPG2	0.140741	turquoise	turquoise
THAP9-AS1	COPS2	0.140349	turquoise	turquoise
THAP9-AS1	COPS7B	0.162734	turquoise	turquoise
THAP9-AS1	COQ6	0.123298	turquoise	turquoise
THAP9-AS1	COQ7	0.163979	turquoise	turquoise
THAP9-AS1	COX11	0.185608	turquoise	turquoise
THAP9-AS1	COX15	0.141184	turquoise	turquoise
THAP9-AS1	COX18	0.147386	turquoise	turquoise
THAP9-AS1	CPD	0.135161	turquoise	turquoise
THAP9-AS1	CPEB2	0.144093	turquoise	turquoise
THAP9-AS1	CPEB4	0.139816	turquoise	turquoise
THAP9-AS1	CPLANE1	0.199867	turquoise	turquoise
THAP9-AS1	CPNE3	0.178654	turquoise	turquoise
THAP9-AS1	CPOX	0.167028	turquoise	turquoise
THAP9-AS1	CPS1	0.061216	turquoise	turquoise
THAP9-AS1	CPSF2	0.172964	turquoise	turquoise
THAP9-AS1	CPSF7	0.234404	turquoise	turquoise
THAP9-AS1	CRB1	0.136039	turquoise	turquoise
THAP9-AS1	CRBN	0.180172	turquoise	turquoise
THAP9-AS1	CRCP	0.206761	turquoise	turquoise
THAP9-AS1	CREB1	0.31938	turquoise	turquoise
THAP9-AS1	CREB3L2	0.152281	turquoise	turquoise
THAP9-AS1	CREBBP	0.143914	turquoise	turquoise
THAP9-AS1	CREBRF	0.146643	turquoise	turquoise
THAP9-AS1	CRIM1	0.102261	turquoise	turquoise
THAP9-AS1	CRKL	0.154247	turquoise	turquoise
THAP9-AS1	CRLF3	0.200997	turquoise	turquoise
THAP9-AS1	CRNKL1	0.228931	turquoise	turquoise
THAP9-AS1	CRPPA	0.194891	turquoise	turquoise
THAP9-AS1	CRTC2	0.150167	turquoise	turquoise
THAP9-AS1	CRY1	0.171965	turquoise	turquoise
THAP9-AS1	CRYBG1	0.174552	turquoise	turquoise
THAP9-AS1	CRYZ	0.177745	turquoise	turquoise
THAP9-AS1	CRYZL1	0.142107	turquoise	turquoise
THAP9-AS1	CRYZL2P	0.153718	turquoise	turquoise
THAP9-AS1	CSE1L	0.237004	turquoise	turquoise
THAP9-AS1	CSGALNACT2	0.133803	turquoise	turquoise
THAP9-AS1	CSNK1A1	0.166001	turquoise	turquoise
THAP9-AS1	CSNK1G1	0.249921	turquoise	turquoise
THAP9-AS1	CSNK1G3	0.332038	turquoise	turquoise
THAP9-AS1	CSNK2A1	0.194473	turquoise	turquoise
THAP9-AS1	CSNK2A2	0.100704	turquoise	turquoise
THAP9-AS1	CSNK2A3	0.137767	turquoise	turquoise
THAP9-AS1	CSTF1	0.184748	turquoise	turquoise
THAP9-AS1	CSTF2T	0.13587	turquoise	turquoise
THAP9-AS1	CSTF3	0.198725	turquoise	turquoise
THAP9-AS1	CT66	0.060156	turquoise	turquoise
THAP9-AS1	CTBS	0.173477	turquoise	turquoise
THAP9-AS1	CTCF	0.216029	turquoise	turquoise
THAP9-AS1	CTDSP2	0.104482	turquoise	turquoise
THAP9-AS1	CTDSPL	0.177176	turquoise	turquoise
THAP9-AS1	CTDSPL2	0.367426	turquoise	turquoise
THAP9-AS1	CTNNB1	0.173091	turquoise	turquoise
THAP9-AS1	CTNND1	0.189728	turquoise	turquoise
THAP9-AS1	CTR9	0.280802	turquoise	turquoise
THAP9-AS1	CTSO	0.184617	turquoise	turquoise
THAP9-AS1	CTTNBP2	0.097147	turquoise	turquoise
THAP9-AS1	CTTNBP2NL	0.160906	turquoise	turquoise
THAP9-AS1	CUL1	0.147063	turquoise	turquoise
THAP9-AS1	CUL2	0.120005	turquoise	turquoise
THAP9-AS1	CUL3	0.24284	turquoise	turquoise
THAP9-AS1	CUL4B	0.306281	turquoise	turquoise
THAP9-AS1	CUL5	0.139964	turquoise	turquoise
THAP9-AS1	CWC22	0.269404	turquoise	turquoise
THAP9-AS1	CWC25	0.161619	turquoise	turquoise
THAP9-AS1	CWF19L1	0.189851	turquoise	turquoise
THAP9-AS1	CWF19L2	0.161567	turquoise	turquoise
THAP9-AS1	CXADR	0.194954	turquoise	turquoise
THAP9-AS1	CXorf38	0.164903	turquoise	turquoise
THAP9-AS1	CXorf56	0.157405	turquoise	turquoise
THAP9-AS1	CXorf58	0.173544	turquoise	turquoise
THAP9-AS1	CXXC4	0.181931	turquoise	turquoise
THAP9-AS1	CYB561D1	0.101136	turquoise	turquoise
THAP9-AS1	CYB5R4	0.152695	turquoise	turquoise
THAP9-AS1	CYFIP1	0.125721	turquoise	turquoise
THAP9-AS1	CYLD	0.243506	turquoise	turquoise
THAP9-AS1	CYP20A1	0.210089	turquoise	turquoise
THAP9-AS1	CYP4V2	0.171484	turquoise	turquoise
THAP9-AS1	CYP7A1	0.137191	turquoise	turquoise
THAP9-AS1	CYP7B1	0.163106	turquoise	turquoise
THAP9-AS1	DAAM1	0.129902	turquoise	turquoise
THAP9-AS1	DAB1	0.064643	turquoise	turquoise
THAP9-AS1	DARS1	0.183413	turquoise	turquoise
THAP9-AS1	DARS2	0.110653	turquoise	turquoise
THAP9-AS1	DBF4	0.22061	turquoise	turquoise
THAP9-AS1	DBIL5P	0.044662	turquoise	turquoise
THAP9-AS1	DBR1	0.224552	turquoise	turquoise
THAP9-AS1	DBT	0.105816	turquoise	turquoise
THAP9-AS1	DCAF1	0.169919	turquoise	turquoise
THAP9-AS1	DCAF12	0.252938	turquoise	turquoise
THAP9-AS1	DCAF13	0.183957	turquoise	turquoise
THAP9-AS1	DCAF16	0.240977	turquoise	turquoise
THAP9-AS1	DCAF17	0.330157	turquoise	turquoise
THAP9-AS1	DCAF4L1	0.096526	turquoise	turquoise
THAP9-AS1	DCAF5	0.084786	turquoise	turquoise
THAP9-AS1	DCAF7	0.162385	turquoise	turquoise
THAP9-AS1	DCAF8	0.14277	turquoise	turquoise
THAP9-AS1	DCBLD2	0.110104	turquoise	turquoise
THAP9-AS1	DCK	0.173483	turquoise	turquoise
THAP9-AS1	DCLK2	0.133544	turquoise	turquoise
THAP9-AS1	DCLRE1A	0.234803	turquoise	turquoise
THAP9-AS1	DCLRE1B	0.14152	turquoise	turquoise
THAP9-AS1	DCLRE1C	0.239398	turquoise	turquoise
THAP9-AS1	DCP1A	0.259729	turquoise	turquoise
THAP9-AS1	DCP1B	0.176966	turquoise	turquoise
THAP9-AS1	DCP2	0.173047	turquoise	turquoise
THAP9-AS1	DCTN1.AS1	0.125516	turquoise	NA
THAP9-AS1	DCTN4	0.193969	turquoise	turquoise
THAP9-AS1	DCTN5	0.179477	turquoise	turquoise
THAP9-AS1	DCUN1D1	0.245258	turquoise	turquoise
THAP9-AS1	DCUN1D4	0.157748	turquoise	turquoise
THAP9-AS1	DDAH1	0.168125	turquoise	turquoise
THAP9-AS1	DDB1	0.096095	turquoise	turquoise
THAP9-AS1	DDHD1	0.073553	turquoise	turquoise
THAP9-AS1	DDI2	0.132528	turquoise	turquoise
THAP9-AS1	DDIT3	0.091246	turquoise	turquoise
THAP9-AS1	DDO	0.103441	turquoise	turquoise
THAP9-AS1	DDX10	0.175524	turquoise	turquoise
THAP9-AS1	DDX18	0.318727	turquoise	turquoise
THAP9-AS1	DDX18P1	0.152843	turquoise	turquoise
THAP9-AS1	DDX20	0.288975	turquoise	turquoise
THAP9-AS1	DDX21	0.18081	turquoise	turquoise
THAP9-AS1	DDX24	0.10633	turquoise	turquoise
THAP9-AS1	DDX3X	0.15565	turquoise	turquoise
THAP9-AS1	DDX42	0.128559	turquoise	turquoise
THAP9-AS1	DDX46	0.266001	turquoise	turquoise
THAP9-AS1	DDX5	0.175419	turquoise	turquoise
THAP9-AS1	DDX50	0.202525	turquoise	turquoise
THAP9-AS1	DDX52	0.350091	turquoise	turquoise
THAP9-AS1	DDX59	0.193005	turquoise	turquoise
THAP9-AS1	DDX6	0.214081	turquoise	turquoise
THAP9-AS1	DEK	0.21538	turquoise	turquoise
THAP9-AS1	DELE1	0.16413	turquoise	turquoise
THAP9-AS1	DENND11	0.228099	turquoise	turquoise
THAP9-AS1	DENND1B	0.18643	turquoise	turquoise
THAP9-AS1	DENND2D	0.164288	turquoise	turquoise
THAP9-AS1	DENND4A	0.252903	turquoise	turquoise
THAP9-AS1	DENND4C	0.180122	turquoise	turquoise
THAP9-AS1	DENND5B	0.082431	turquoise	turquoise
THAP9-AS1	DENND6A	0.254276	turquoise	turquoise
THAP9-AS1	DENR	0.253359	turquoise	turquoise
THAP9-AS1	DEPDC4	0.185881	turquoise	turquoise
THAP9-AS1	DESI1	0.15784	turquoise	turquoise
THAP9-AS1	DET1	0.156554	turquoise	turquoise
THAP9-AS1	DFFA	0.155401	turquoise	turquoise
THAP9-AS1	DGKE	0.167118	turquoise	turquoise
THAP9-AS1	DGKH	0.16184	turquoise	turquoise
THAP9-AS1	DHFR2	0.197138	turquoise	turquoise
THAP9-AS1	DHRS4.AS1	0.150266	turquoise	NA
THAP9-AS1	DHTKD1	0.098547	turquoise	turquoise
THAP9-AS1	DHX15	0.288534	turquoise	turquoise
THAP9-AS1	DHX29	0.255503	turquoise	turquoise
THAP9-AS1	DHX32	0.194717	turquoise	turquoise
THAP9-AS1	DHX33	0.234614	turquoise	turquoise
THAP9-AS1	DHX35	0.177765	turquoise	turquoise
THAP9-AS1	DHX36	0.339871	turquoise	turquoise
THAP9-AS1	DHX40	0.31915	turquoise	turquoise
THAP9-AS1	DHX57	0.304947	turquoise	turquoise
THAP9-AS1	DHX8	0.151544	turquoise	turquoise
THAP9-AS1	DHX9	0.264128	turquoise	turquoise
THAP9-AS1	DIABLO	0.182179	turquoise	turquoise
THAP9-AS1	DIAPH1	0.156017	turquoise	turquoise
THAP9-AS1	DICER1	0.151056	turquoise	turquoise
THAP9-AS1	DIMT1	0.224601	turquoise	turquoise
THAP9-AS1	DIP2B	0.222354	turquoise	turquoise
THAP9-AS1	DIPK2A	0.180606	turquoise	turquoise
THAP9-AS1	DIS3	0.270473	turquoise	turquoise
THAP9-AS1	DIS3L	0.061692	turquoise	turquoise
THAP9-AS1	DISC1	0.164804	turquoise	turquoise
THAP9-AS1	DIXDC1	0.078852	turquoise	turquoise
THAP9-AS1	DLEU2	0.158302	turquoise	turquoise
THAP9-AS1	DLG1	0.12149	turquoise	turquoise
THAP9-AS1	DLGAP2	0.160727	turquoise	turquoise
THAP9-AS1	DMAC2L	0.149665	turquoise	turquoise
THAP9-AS1	DMC1	0.175975	turquoise	turquoise
THAP9-AS1	DMXL1	0.144844	turquoise	turquoise
THAP9-AS1	DMXL2	0.104175	turquoise	turquoise
THAP9-AS1	DNAAF2	0.197062	turquoise	turquoise
THAP9-AS1	DNAH10	0.120887	turquoise	turquoise
THAP9-AS1	DNAI3	0.152594	turquoise	turquoise
THAP9-AS1	DNAJB14	0.2241	turquoise	turquoise
THAP9-AS1	DNAJB6P1	0.109472	turquoise	turquoise
THAP9-AS1	DNAJB9	0.175752	turquoise	turquoise
THAP9-AS1	DNAJC10	0.234754	turquoise	turquoise
THAP9-AS1	DNAJC11	0.097592	turquoise	turquoise
THAP9-AS1	DNAJC13	0.114601	turquoise	turquoise
THAP9-AS1	DNAJC16	0.279685	turquoise	turquoise
THAP9-AS1	DNAJC18	0.165196	turquoise	turquoise
THAP9-AS1	DNAJC2	0.193932	turquoise	turquoise
THAP9-AS1	DNAJC21	0.146813	turquoise	turquoise
THAP9-AS1	DNAJC24	0.127023	turquoise	turquoise
THAP9-AS1	DNAJC27	0.2635	turquoise	turquoise
THAP9-AS1	DNAJC27.AS1	0.122318	turquoise	NA
THAP9-AS1	DNAJC28	0.125185	turquoise	turquoise
THAP9-AS1	DNAJC3	0.19599	turquoise	turquoise
THAP9-AS1	DNAJC6	0.170337	turquoise	turquoise
THAP9-AS1	DNAJC9.AS1	0.162611	turquoise	NA
THAP9-AS1	DNAL1	0.148446	turquoise	turquoise
THAP9-AS1	DNM1L	0.216328	turquoise	turquoise
THAP9-AS1	DNMBP	0.143004	turquoise	turquoise
THAP9-AS1	DNMT3B	0.156692	turquoise	turquoise
THAP9-AS1	DNTTIP2	0.183041	turquoise	turquoise
THAP9-AS1	DOCK1	0.174284	turquoise	turquoise
THAP9-AS1	DOCK10	0.162661	turquoise	turquoise
THAP9-AS1	DOCK3	0.044207	turquoise	turquoise
THAP9-AS1	DOCK4	0.109487	turquoise	turquoise
THAP9-AS1	DOCK7	0.150994	turquoise	turquoise
THAP9-AS1	DOCK8	0.126999	turquoise	turquoise
THAP9-AS1	DOCK9	0.11809	turquoise	turquoise
THAP9-AS1	DOK6	0.120763	turquoise	turquoise
THAP9-AS1	DONSON	0.17623	turquoise	turquoise
THAP9-AS1	DOP1A	0.248716	turquoise	turquoise
THAP9-AS1	DPH6	0.23588	turquoise	turquoise
THAP9-AS1	DPP8	0.125236	turquoise	turquoise
THAP9-AS1	DPY19L2	0.151838	turquoise	turquoise
THAP9-AS1	DPY19L2P3	0.150555	turquoise	turquoise
THAP9-AS1	DPY19L3	0.278451	turquoise	turquoise
THAP9-AS1	DPY19L4	0.258473	turquoise	turquoise
THAP9-AS1	DR1	0.225724	turquoise	turquoise
THAP9-AS1	DROSHA	0.230612	turquoise	turquoise
THAP9-AS1	DSCAM	0.100557	turquoise	turquoise
THAP9-AS1	DSCC1	0.168221	turquoise	turquoise
THAP9-AS1	DSG2	0.207121	turquoise	turquoise
THAP9-AS1	DSG2.AS1	0.187352	turquoise	NA
THAP9-AS1	DSN1	0.172652	turquoise	turquoise
THAP9-AS1	DSTNP3	0.129014	turquoise	turquoise
THAP9-AS1	DSTYK	0.223757	turquoise	turquoise
THAP9-AS1	DTD2	0.128741	turquoise	turquoise
THAP9-AS1	DTWD1	0.198422	turquoise	turquoise
THAP9-AS1	DTWD2	0.166378	turquoise	turquoise
THAP9-AS1	DUBR	0.177574	turquoise	turquoise
THAP9-AS1	DUS4L	0.273362	turquoise	turquoise
THAP9-AS1	DUSP10	0.108835	turquoise	turquoise
THAP9-AS1	DUSP11	0.193372	turquoise	turquoise
THAP9-AS1	DUSP12	0.187652	turquoise	turquoise
THAP9-AS1	DUSP18	0.159066	turquoise	turquoise
THAP9-AS1	DUSP19	0.174471	turquoise	turquoise
THAP9-AS1	DUSP6	0.173732	turquoise	turquoise
THAP9-AS1	DUXAP1	0.072442	turquoise	turquoise
THAP9-AS1	DVL3	0.160553	turquoise	turquoise
THAP9-AS1	DYM	0.176321	turquoise	turquoise
THAP9-AS1	DYNC1H1	0.067414	turquoise	turquoise
THAP9-AS1	DYNC1I2	0.136971	turquoise	turquoise
THAP9-AS1	DYNC1I2P1	0.132139	turquoise	turquoise
THAP9-AS1	DYNC1LI1	0.167296	turquoise	turquoise
THAP9-AS1	DYNC1LI2	0.070803	turquoise	turquoise
THAP9-AS1	DYNC2H1	0.137737	turquoise	turquoise
THAP9-AS1	DYNC2I1	0.139621	turquoise	turquoise
THAP9-AS1	DYNC2LI1	0.211594	turquoise	turquoise
THAP9-AS1	DYRK1A	0.26791	turquoise	turquoise
THAP9-AS1	DYRK3	0.164974	turquoise	turquoise
THAP9-AS1	DZIP3	0.161831	turquoise	turquoise
THAP9-AS1	E2F3	0.163041	turquoise	turquoise
THAP9-AS1	EAF1	0.204617	turquoise	turquoise
THAP9-AS1	EAPP	0.184566	turquoise	turquoise
THAP9-AS1	EBLN3P	0.329973	turquoise	turquoise
THAP9-AS1	ECD	0.231929	turquoise	turquoise
THAP9-AS1	ECI2.DT	0.058413	turquoise	NA
THAP9-AS1	ECPAS	0.075972	turquoise	turquoise
THAP9-AS1	ECT2	0.166272	turquoise	turquoise
THAP9-AS1	ECT2L	0.189018	turquoise	turquoise
THAP9-AS1	EDA2R	0.168523	turquoise	turquoise
THAP9-AS1	EDEM1	0.23523	turquoise	turquoise
THAP9-AS1	EDEM3	0.155258	turquoise	turquoise
THAP9-AS1	EDIL3	0.15608	turquoise	turquoise
THAP9-AS1	EDN1	0.116148	turquoise	turquoise
THAP9-AS1	EDNRA	0.157627	turquoise	turquoise
THAP9-AS1	EDRF1	0.257642	turquoise	turquoise
THAP9-AS1	EEA1	0.096311	turquoise	turquoise
THAP9-AS1	EED	0.176057	turquoise	turquoise
THAP9-AS1	EEF1AKMT2	0.23856	turquoise	turquoise
THAP9-AS1	EEF1AKMT3	0.191405	turquoise	turquoise
THAP9-AS1	EEF2K	0.129759	turquoise	turquoise
THAP9-AS1	EFCAB10	0.173618	turquoise	turquoise
THAP9-AS1	EFCAB14	0.122354	turquoise	turquoise
THAP9-AS1	EFCAB2	0.092224	turquoise	turquoise
THAP9-AS1	EFCAB7	0.225881	turquoise	turquoise
THAP9-AS1	EFHB	0.131626	turquoise	turquoise
THAP9-AS1	EFL1	0.163483	turquoise	turquoise
THAP9-AS1	EFNA5	0.192102	turquoise	turquoise
THAP9-AS1	EFNB2	0.159802	turquoise	turquoise
THAP9-AS1	EFR3A	0.142607	turquoise	turquoise
THAP9-AS1	EGFR	0.08149	turquoise	turquoise
THAP9-AS1	EIF1AD	0.166782	turquoise	turquoise
THAP9-AS1	EIF1AX	0.179856	turquoise	turquoise
THAP9-AS1	EIF1AX.AS1	0.141468	turquoise	NA
THAP9-AS1	EIF2A	0.185067	turquoise	turquoise
THAP9-AS1	EIF2AK1	0.158804	turquoise	turquoise
THAP9-AS1	EIF2AK2	0.152072	turquoise	turquoise
THAP9-AS1	EIF2AK3	0.294368	turquoise	turquoise
THAP9-AS1	EIF2AK4	0.127073	turquoise	turquoise
THAP9-AS1	EIF2AP4	0.11449	turquoise	turquoise
THAP9-AS1	EIF2S1	0.131737	turquoise	turquoise
THAP9-AS1	EIF2S3	0.177143	turquoise	turquoise
THAP9-AS1	EIF3A	0.099869	turquoise	turquoise
THAP9-AS1	EIF3EP4	0.13705	turquoise	turquoise
THAP9-AS1	EIF4A2	0.156349	turquoise	turquoise
THAP9-AS1	EIF4B	0.147998	turquoise	turquoise
THAP9-AS1	EIF4E	0.197456	turquoise	turquoise
THAP9-AS1	EIF4ENIF1	0.19233	turquoise	turquoise
THAP9-AS1	EIF4G2	0.113166	turquoise	turquoise
THAP9-AS1	EIF4G3	0.087843	turquoise	turquoise
THAP9-AS1	EIF5	0.110983	turquoise	turquoise
THAP9-AS1	ELAVL4	0.19227	turquoise	turquoise
THAP9-AS1	ELF1	0.178069	turquoise	turquoise
THAP9-AS1	ELF2	0.278477	turquoise	turquoise
THAP9-AS1	ELK1	0.134117	turquoise	turquoise
THAP9-AS1	ELK4	0.149141	turquoise	turquoise
THAP9-AS1	ELL2	0.150098	turquoise	turquoise
THAP9-AS1	ELMO2	0.136319	turquoise	turquoise
THAP9-AS1	ELMOD2	0.185091	turquoise	turquoise
THAP9-AS1	ELOA	0.086487	turquoise	turquoise
THAP9-AS1	ELOA.AS1	0.172984	turquoise	NA
THAP9-AS1	ELOVL4	0.180574	turquoise	turquoise
THAP9-AS1	ELP1	0.264712	turquoise	turquoise
THAP9-AS1	EMC1	0.13808	turquoise	turquoise
THAP9-AS1	EML4	0.18326	turquoise	turquoise
THAP9-AS1	EML6	0.174261	turquoise	turquoise
THAP9-AS1	EMSY	0.283538	turquoise	turquoise
THAP9-AS1	ENAH	0.176885	turquoise	turquoise
THAP9-AS1	ENC1	0.157856	turquoise	turquoise
THAP9-AS1	ENDOD1	0.164861	turquoise	turquoise
THAP9-AS1	ENKUR	0.177651	turquoise	turquoise
THAP9-AS1	ENOPH1	0.18175	turquoise	turquoise
THAP9-AS1	ENOX2	0.129238	turquoise	turquoise
THAP9-AS1	ENPP4	0.086799	turquoise	turquoise
THAP9-AS1	ENPP7P8	0.152722	turquoise	turquoise
THAP9-AS1	ENTPD1.AS1	0.154845	turquoise	NA
THAP9-AS1	ENTPD4	0.174637	turquoise	turquoise
THAP9-AS1	EOGT	0.175167	turquoise	turquoise
THAP9-AS1	EP300	0.171047	turquoise	turquoise
THAP9-AS1	EP400	0.146305	turquoise	turquoise
THAP9-AS1	EPB41	0.112005	turquoise	turquoise
THAP9-AS1	EPB41L4A	0.087342	turquoise	turquoise
THAP9-AS1	EPB41L5	0.207177	turquoise	turquoise
THAP9-AS1	EPC1	0.229081	turquoise	turquoise
THAP9-AS1	EPC2	0.299519	turquoise	turquoise
THAP9-AS1	EPG5	0.223996	turquoise	turquoise
THAP9-AS1	EPHA4	0.154481	turquoise	turquoise
THAP9-AS1	EPM2AIP1	0.261601	turquoise	turquoise
THAP9-AS1	EPN2.AS1	0.163345	turquoise	NA
THAP9-AS1	EPRS1	0.184616	turquoise	turquoise
THAP9-AS1	EPS15L1	0.118626	turquoise	turquoise
THAP9-AS1	EQTN	0.165644	turquoise	turquoise
THAP9-AS1	ERBIN	0.314044	turquoise	turquoise
THAP9-AS1	ERC1	0.086326	turquoise	turquoise
THAP9-AS1	ERCC3	0.159115	turquoise	turquoise
THAP9-AS1	ERCC4	0.189761	turquoise	turquoise
THAP9-AS1	ERCC5	0.12907	turquoise	turquoise
THAP9-AS1	ERCC6	0.236117	turquoise	turquoise
THAP9-AS1	ERCC6L2	0.245995	turquoise	turquoise
THAP9-AS1	ERCC8	0.121879	turquoise	turquoise
THAP9-AS1	ERGIC2	0.148575	turquoise	turquoise
THAP9-AS1	ERI1	0.148419	turquoise	turquoise
THAP9-AS1	ERI2	0.201168	turquoise	turquoise
THAP9-AS1	ERICH2	0.177418	turquoise	turquoise
THAP9-AS1	ERLIN1	0.132448	turquoise	turquoise
THAP9-AS1	ERLIN2	0.192227	turquoise	turquoise
THAP9-AS1	ERMAP	0.108398	turquoise	turquoise
THAP9-AS1	ERMARD	0.200694	turquoise	turquoise
THAP9-AS1	ERO1A	0.158337	turquoise	turquoise
THAP9-AS1	ESCO1	0.282131	turquoise	turquoise
THAP9-AS1	ESF1	0.269144	turquoise	turquoise
THAP9-AS1	ESYT2	0.100591	turquoise	turquoise
THAP9-AS1	ETAA1	0.286309	turquoise	turquoise
THAP9-AS1	ETFBKMT	0.143636	turquoise	turquoise
THAP9-AS1	ETNK1	0.280016	turquoise	turquoise
THAP9-AS1	ETV3	0.140288	turquoise	turquoise
THAP9-AS1	EVI5	0.114666	turquoise	turquoise
THAP9-AS1	EXD2	0.207305	turquoise	turquoise
THAP9-AS1	EXO5	0.165852	turquoise	turquoise
THAP9-AS1	EXOC1	0.225618	turquoise	turquoise
THAP9-AS1	EXOC2	0.151989	turquoise	turquoise
THAP9-AS1	EXOC4	0.114793	turquoise	turquoise
THAP9-AS1	EXOC5	0.103702	turquoise	turquoise
THAP9-AS1	EXOC6	0.163894	turquoise	turquoise
THAP9-AS1	EXOC7	0.095913	turquoise	turquoise
THAP9-AS1	EXOC8	0.192462	turquoise	turquoise
THAP9-AS1	EXOSC10	0.160399	turquoise	turquoise
THAP9-AS1	EXOSC3	0.176894	turquoise	turquoise
THAP9-AS1	EXOSC8	0.194889	turquoise	turquoise
THAP9-AS1	EXOSC9	0.19944	turquoise	turquoise
THAP9-AS1	EXPH5	0.196453	turquoise	turquoise
THAP9-AS1	EXTL2	0.156313	turquoise	turquoise
THAP9-AS1	EXTL3	0.107126	turquoise	turquoise
THAP9-AS1	EYA3	0.216125	turquoise	turquoise
THAP9-AS1	F11R	0.158771	turquoise	turquoise
THAP9-AS1	F2R	0.144772	turquoise	turquoise
THAP9-AS1	FAF1	0.158686	turquoise	turquoise
THAP9-AS1	FAF2	0.284502	turquoise	turquoise
THAP9-AS1	FAM102B	0.21588	turquoise	turquoise
THAP9-AS1	FAM104A	0.173793	turquoise	turquoise
THAP9-AS1	FAM106A	0.164215	turquoise	turquoise
THAP9-AS1	FAM111A	0.256624	turquoise	turquoise
THAP9-AS1	FAM111A.DT	0.174922	turquoise	NA
THAP9-AS1	FAM114A2	0.149148	turquoise	turquoise
THAP9-AS1	FAM117A	0.159827	turquoise	turquoise
THAP9-AS1	FAM117B	0.206702	turquoise	turquoise
THAP9-AS1	FAM120A	0.20524	turquoise	turquoise
THAP9-AS1	FAM120B	0.26551	turquoise	turquoise
THAP9-AS1	FAM120C	0.114428	turquoise	turquoise
THAP9-AS1	FAM122A	0.187994	turquoise	turquoise
THAP9-AS1	FAM122B	0.343949	turquoise	turquoise
THAP9-AS1	FAM122C	0.17573	turquoise	turquoise
THAP9-AS1	FAM126A	0.172904	turquoise	turquoise
THAP9-AS1	FAM126B	0.136337	turquoise	turquoise
THAP9-AS1	FAM133A	0.194662	turquoise	turquoise
THAP9-AS1	FAM133B	0.298796	turquoise	turquoise
THAP9-AS1	FAM135A	0.220414	turquoise	turquoise
THAP9-AS1	FAM13B	0.268902	turquoise	turquoise
THAP9-AS1	FAM149B1	0.240311	turquoise	turquoise
THAP9-AS1	FAM151B	0.147891	turquoise	turquoise
THAP9-AS1	FAM153B	0.122547	turquoise	turquoise
THAP9-AS1	FAM156A	0.105741	turquoise	turquoise
THAP9-AS1	FAM160B1	0.085881	turquoise	turquoise
THAP9-AS1	FAM161A	0.151213	turquoise	turquoise
THAP9-AS1	FAM168A	0.155924	turquoise	turquoise
THAP9-AS1	FAM168B	0.110242	turquoise	turquoise
THAP9-AS1	FAM169A	0.175173	turquoise	turquoise
THAP9-AS1	FAM171B	0.175053	turquoise	turquoise
THAP9-AS1	FAM172A	0.169172	turquoise	turquoise
THAP9-AS1	FAM184A	0.117815	turquoise	turquoise
THAP9-AS1	FAM185A	0.154048	turquoise	turquoise
THAP9-AS1	FAM199X	0.23011	turquoise	turquoise
THAP9-AS1	FAM200A	0.185778	turquoise	turquoise
THAP9-AS1	FAM209A	0.182705	turquoise	turquoise
THAP9-AS1	FAM20B	0.096703	turquoise	turquoise
THAP9-AS1	FAM210B	0.160678	turquoise	turquoise
THAP9-AS1	FAM214A	0.142009	turquoise	turquoise
THAP9-AS1	FAM216A	0.194821	turquoise	turquoise
THAP9-AS1	FAM221A	0.199079	turquoise	turquoise
THAP9-AS1	FAM222B	0.175046	turquoise	turquoise
THAP9-AS1	FAM47E	0.134341	turquoise	turquoise
THAP9-AS1	FAM53C	0.165827	turquoise	turquoise
THAP9-AS1	FAM66C	0.185469	turquoise	turquoise
THAP9-AS1	FAM71D	0.204664	turquoise	turquoise
THAP9-AS1	FAM76B	0.271484	turquoise	turquoise
THAP9-AS1	FAM8A1	0.228312	turquoise	turquoise
THAP9-AS1	FAM91A1	0.277753	turquoise	turquoise
THAP9-AS1	FAM98B	0.202498	turquoise	turquoise
THAP9-AS1	FAN1	0.122796	turquoise	turquoise
THAP9-AS1	FANCB	0.181222	turquoise	turquoise
THAP9-AS1	FANCE	0.059602	turquoise	turquoise
THAP9-AS1	FANCL	0.229481	turquoise	turquoise
THAP9-AS1	FANCM	0.228953	turquoise	turquoise
THAP9-AS1	FAR1	0.245194	turquoise	turquoise
THAP9-AS1	FARP2	0.21428	turquoise	turquoise
THAP9-AS1	FAS	0.187578	turquoise	turquoise
THAP9-AS1	FASTKD1	0.178458	turquoise	turquoise
THAP9-AS1	FASTKD2	0.241329	turquoise	turquoise
THAP9-AS1	FASTKD3	0.274859	turquoise	turquoise
THAP9-AS1	FASTKD5	0.15692	turquoise	turquoise
THAP9-AS1	FAT1	0.13471	turquoise	turquoise
THAP9-AS1	FBH1	0.104503	turquoise	turquoise
THAP9-AS1	FBXL13	0.200264	turquoise	turquoise
THAP9-AS1	FBXL17	0.097573	turquoise	turquoise
THAP9-AS1	FBXL18	0.061494	turquoise	turquoise
THAP9-AS1	FBXL20	0.144452	turquoise	turquoise
THAP9-AS1	FBXL3	0.170038	turquoise	turquoise
THAP9-AS1	FBXL4	0.21227	turquoise	turquoise
THAP9-AS1	FBXO11	0.142043	turquoise	turquoise
THAP9-AS1	FBXO21	0.174233	turquoise	turquoise
THAP9-AS1	FBXO22	0.237164	turquoise	turquoise
THAP9-AS1	FBXO25	0.284895	turquoise	turquoise
THAP9-AS1	FBXO28	0.299888	turquoise	turquoise
THAP9-AS1	FBXO3	0.198722	turquoise	turquoise
THAP9-AS1	FBXO30	0.236955	turquoise	turquoise
THAP9-AS1	FBXO30.DT	0.165649	turquoise	NA
THAP9-AS1	FBXO34	0.185277	turquoise	turquoise
THAP9-AS1	FBXO38	0.225287	turquoise	turquoise
THAP9-AS1	FBXO39	0.151414	turquoise	turquoise
THAP9-AS1	FBXO42	0.165573	turquoise	turquoise
THAP9-AS1	FBXO48	0.133119	turquoise	turquoise
THAP9-AS1	FBXO5	0.213337	turquoise	turquoise
THAP9-AS1	FBXO9	0.131255	turquoise	turquoise
THAP9-AS1	FBXW11	0.21147	turquoise	turquoise
THAP9-AS1	FBXW11P1	0.088335	turquoise	turquoise
THAP9-AS1	FBXW2	0.111057	turquoise	turquoise
THAP9-AS1	FBXW7	0.165964	turquoise	turquoise
THAP9-AS1	FBXW7.AS1	0.164378	turquoise	NA
THAP9-AS1	FCF1	0.192903	turquoise	turquoise
THAP9-AS1	FCHO2	0.220004	turquoise	turquoise
THAP9-AS1	FDXACB1	0.177734	turquoise	turquoise
THAP9-AS1	FECH	0.123295	turquoise	turquoise
THAP9-AS1	FEM1B	0.315755	turquoise	turquoise
THAP9-AS1	FEM1C	0.155603	turquoise	turquoise
THAP9-AS1	FER	0.120994	turquoise	turquoise
THAP9-AS1	FGD4	0.090633	turquoise	turquoise
THAP9-AS1	FGD6	0.167341	turquoise	turquoise
THAP9-AS1	FGFR1OP2	0.202962	turquoise	turquoise
THAP9-AS1	FICD	0.094784	turquoise	turquoise
THAP9-AS1	FIGLA	0.137193	turquoise	turquoise
THAP9-AS1	FIGNL1	0.196787	turquoise	turquoise
THAP9-AS1	FIGNL2.DT	0.106566	turquoise	NA
THAP9-AS1	FIP1L1	0.158119	turquoise	turquoise
THAP9-AS1	FKBP14	0.143682	turquoise	turquoise
THAP9-AS1	FKBP15	0.126654	turquoise	turquoise
THAP9-AS1	FKTN	0.229336	turquoise	turquoise
THAP9-AS1	FLCN	0.11853	turquoise	turquoise
THAP9-AS1	FLG	0.074362	turquoise	turquoise
THAP9-AS1	FLG.AS1	0.138914	turquoise	NA
THAP9-AS1	FLJ22447	0.193348	turquoise	turquoise
THAP9-AS1	FLJ31104	0.182374	turquoise	turquoise
THAP9-AS1	FLJ46284	0.178418	turquoise	turquoise
THAP9-AS1	FLVCR1	0.196873	turquoise	turquoise
THAP9-AS1	FMO4	0.145692	turquoise	turquoise
THAP9-AS1	FMR1	0.312356	turquoise	turquoise
THAP9-AS1	FNBP1	0.151398	turquoise	turquoise
THAP9-AS1	FNBP1L	0.203144	turquoise	turquoise
THAP9-AS1	FNDC3A	0.302472	turquoise	turquoise
THAP9-AS1	FNDC3B	0.073993	turquoise	turquoise
THAP9-AS1	FNIP1	0.114023	turquoise	turquoise
THAP9-AS1	FOCAD	0.149723	turquoise	turquoise
THAP9-AS1	FOXC1	0.197908	turquoise	turquoise
THAP9-AS1	FOXJ2	0.186072	turquoise	turquoise
THAP9-AS1	FOXJ3	0.239474	turquoise	turquoise
THAP9-AS1	FOXK2	0.145792	turquoise	turquoise
THAP9-AS1	FOXP1	0.18039	turquoise	turquoise
THAP9-AS1	FOXRED2	0.158857	turquoise	turquoise
THAP9-AS1	FPGT	0.209465	turquoise	turquoise
THAP9-AS1	FRA10AC1	0.138034	turquoise	turquoise
THAP9-AS1	FRAS1	0.155955	turquoise	turquoise
THAP9-AS1	FRMD4B	0.18029	turquoise	turquoise
THAP9-AS1	FRRS1	0.157829	turquoise	turquoise
THAP9-AS1	FRYL	0.164206	turquoise	turquoise
THAP9-AS1	FSIP2.AS1	0.19899	turquoise	NA
THAP9-AS1	FTX	0.156259	turquoise	turquoise
THAP9-AS1	FUBP1	0.264348	turquoise	turquoise
THAP9-AS1	FUBP3	0.171814	turquoise	turquoise
THAP9-AS1	FUT10	0.148575	turquoise	turquoise
THAP9-AS1	FUT8	0.150236	turquoise	turquoise
THAP9-AS1	FYTTD1	0.130799	turquoise	turquoise
THAP9-AS1	FZD6	0.241964	turquoise	turquoise
THAP9-AS1	G2E3	0.320754	turquoise	turquoise
THAP9-AS1	G3BP1	0.280306	turquoise	turquoise
THAP9-AS1	G3BP2	0.16166	turquoise	turquoise
THAP9-AS1	GAB1	0.183578	turquoise	turquoise
THAP9-AS1	GABPA	0.195158	turquoise	turquoise
THAP9-AS1	GABPB1	0.230385	turquoise	turquoise
THAP9-AS1	GABPB2	0.118508	turquoise	turquoise
THAP9-AS1	GALC	0.205997	turquoise	turquoise
THAP9-AS1	GALK2	0.145559	turquoise	turquoise
THAP9-AS1	GALNT1	0.185735	turquoise	turquoise
THAP9-AS1	GALNT10	0.140139	turquoise	turquoise
THAP9-AS1	GALNT11	0.133841	turquoise	turquoise
THAP9-AS1	GALNT5	0.179698	turquoise	turquoise
THAP9-AS1	GAN	0.175867	turquoise	turquoise
THAP9-AS1	GANAB	0.126519	turquoise	turquoise
THAP9-AS1	GANC	0.134553	turquoise	turquoise
THAP9-AS1	GAPVD1	0.181673	turquoise	turquoise
THAP9-AS1	GAREM1	0.136093	turquoise	turquoise
THAP9-AS1	GARRE1	0.091044	turquoise	turquoise
THAP9-AS1	GART	0.160877	turquoise	turquoise
THAP9-AS1	GAS2L3	0.139644	turquoise	turquoise
THAP9-AS1	GAS6.DT	0.165239	turquoise	NA
THAP9-AS1	GASK1B	0.1545	turquoise	turquoise
THAP9-AS1	GATAD1	0.220128	turquoise	turquoise
THAP9-AS1	GATAD2B	0.231985	turquoise	turquoise
THAP9-AS1	GATC	0.14967	turquoise	turquoise
THAP9-AS1	GATM	0.183193	turquoise	turquoise
THAP9-AS1	GBF1	0.113519	turquoise	turquoise
THAP9-AS1	GBP2	0.157985	turquoise	turquoise
THAP9-AS1	GBP3	0.181408	turquoise	turquoise
THAP9-AS1	GCA	0.192565	turquoise	turquoise
THAP9-AS1	GCC2	0.264493	turquoise	turquoise
THAP9-AS1	GCFC2	0.16609	turquoise	turquoise
THAP9-AS1	GCH1	0.193189	turquoise	turquoise
THAP9-AS1	GCLM	0.163429	turquoise	turquoise
THAP9-AS1	GCN1	0.083872	turquoise	turquoise
THAP9-AS1	GCNA	0.102261	turquoise	turquoise
THAP9-AS1	GCNT1	0.129623	turquoise	turquoise
THAP9-AS1	GCNT4	0.186331	turquoise	turquoise
THAP9-AS1	GDAP2	0.153985	turquoise	turquoise
THAP9-AS1	GDF11	0.135711	turquoise	turquoise
THAP9-AS1	GDPD1	0.188811	turquoise	turquoise
THAP9-AS1	GDPGP1	0.158092	turquoise	turquoise
THAP9-AS1	GEMIN5	0.146603	turquoise	turquoise
THAP9-AS1	GFM1	0.133548	turquoise	turquoise
THAP9-AS1	GFM2	0.155816	turquoise	turquoise
THAP9-AS1	GFPT1	0.083055	turquoise	turquoise
THAP9-AS1	GGCX	0.08893	turquoise	turquoise
THAP9-AS1	GGH	0.178589	turquoise	turquoise
THAP9-AS1	GGNBP2	0.137572	turquoise	turquoise
THAP9-AS1	GIGYF2	0.173019	turquoise	turquoise
THAP9-AS1	GIN1	0.18381	turquoise	turquoise
THAP9-AS1	GINS3	0.082893	turquoise	turquoise
THAP9-AS1	GIT2	0.117761	turquoise	turquoise
THAP9-AS1	GK	0.183654	turquoise	turquoise
THAP9-AS1	GK5	0.185764	turquoise	turquoise
THAP9-AS1	GLCE	0.159909	turquoise	turquoise
THAP9-AS1	GLE1	0.147527	turquoise	turquoise
THAP9-AS1	GLG1	0.105112	turquoise	turquoise
THAP9-AS1	GLIPR1L1	0.170791	turquoise	turquoise
THAP9-AS1	GLIPR1L2	0.155583	turquoise	turquoise
THAP9-AS1	GLMN	0.262738	turquoise	turquoise
THAP9-AS1	GLRA1	0.041391	turquoise	turquoise
THAP9-AS1	GLS	0.148885	turquoise	turquoise
THAP9-AS1	GLT8D2	0.161616	turquoise	turquoise
THAP9-AS1	GMCL1	0.152065	turquoise	turquoise
THAP9-AS1	GMEB1	0.202921	turquoise	turquoise
THAP9-AS1	GMFB	0.142639	turquoise	turquoise
THAP9-AS1	GMPS	0.276449	turquoise	turquoise
THAP9-AS1	GNA13	0.197345	turquoise	turquoise
THAP9-AS1	GNAL	0.083699	turquoise	turquoise
THAP9-AS1	GNAQ	0.151188	turquoise	turquoise
THAP9-AS1	GNB4	0.166633	turquoise	turquoise
THAP9-AS1	GNE	0.14486	turquoise	turquoise
THAP9-AS1	GNG12.AS1	0.168478	turquoise	NA
THAP9-AS1	GNL2	0.16439	turquoise	turquoise
THAP9-AS1	GNL3	0.18338	turquoise	turquoise
THAP9-AS1	GNL3L	0.13213	turquoise	turquoise
THAP9-AS1	GNPDA2	0.226969	turquoise	turquoise
THAP9-AS1	GNPNAT1	0.197067	turquoise	turquoise
THAP9-AS1	GNPTAB	0.189278	turquoise	turquoise
THAP9-AS1	GNRHR	0.174927	turquoise	turquoise
THAP9-AS1	GNRHR2	0.158762	turquoise	turquoise
THAP9-AS1	GOLGA1	0.207068	turquoise	turquoise
THAP9-AS1	GOLGA3	0.083377	turquoise	turquoise
THAP9-AS1	GOLGA4	0.083742	turquoise	turquoise
THAP9-AS1	GOLGA5	0.17162	turquoise	turquoise
THAP9-AS1	GOLGA8F	0.063792	turquoise	turquoise
THAP9-AS1	GOLGA8N	0.125188	turquoise	turquoise
THAP9-AS1	GOLGA8R	0.039844	turquoise	turquoise
THAP9-AS1	GOLGA8T	0.053408	turquoise	turquoise
THAP9-AS1	GOLGB1	0.204525	turquoise	turquoise
THAP9-AS1	GOLM2	0.185326	turquoise	turquoise
THAP9-AS1	GOLPH3	0.188433	turquoise	turquoise
THAP9-AS1	GOLPH3L	0.274925	turquoise	turquoise
THAP9-AS1	GON4L	0.156587	turquoise	turquoise
THAP9-AS1	GOPC	0.359748	turquoise	turquoise
THAP9-AS1	GORAB	0.227966	turquoise	turquoise
THAP9-AS1	GOSR1	0.367799	turquoise	turquoise
THAP9-AS1	GOSR2	0.120257	turquoise	turquoise
THAP9-AS1	GPALPP1	0.279914	turquoise	turquoise
THAP9-AS1	GPATCH2	0.215739	turquoise	turquoise
THAP9-AS1	GPATCH2L	0.239646	turquoise	turquoise
THAP9-AS1	GPATCH8	0.181505	turquoise	turquoise
THAP9-AS1	GPBP1	0.379854	turquoise	turquoise
THAP9-AS1	GPBP1L1	0.321729	turquoise	turquoise
THAP9-AS1	GPCPD1	0.180417	turquoise	turquoise
THAP9-AS1	GPD2	0.237619	turquoise	turquoise
THAP9-AS1	GPHN	0.115288	turquoise	turquoise
THAP9-AS1	GPR107	0.163924	turquoise	turquoise
THAP9-AS1	GPR135	0.131311	turquoise	turquoise
THAP9-AS1	GPR161	0.143654	turquoise	turquoise
THAP9-AS1	GPR199P	0.179021	turquoise	turquoise
THAP9-AS1	GPR3	0.058193	turquoise	turquoise
THAP9-AS1	GPR62	0.0222	turquoise	turquoise
THAP9-AS1	GPR63	0.186001	turquoise	turquoise
THAP9-AS1	GPR89A	0.169459	turquoise	turquoise
THAP9-AS1	GPR89B	0.187975	turquoise	turquoise
THAP9-AS1	GPRASP1	0.152745	turquoise	turquoise
THAP9-AS1	GPRC5A	0.081249	turquoise	turquoise
THAP9-AS1	GPRC5B	0.103119	turquoise	turquoise
THAP9-AS1	GRB10	0.119708	turquoise	turquoise
THAP9-AS1	GRM1	0.15823	turquoise	turquoise
THAP9-AS1	GRM2	0.184102	turquoise	turquoise
THAP9-AS1	GRM3	0.092244	turquoise	turquoise
THAP9-AS1	GRM7	0.073852	turquoise	turquoise
THAP9-AS1	GRPEL2	0.151746	turquoise	turquoise
THAP9-AS1	GSAP	0.248197	turquoise	turquoise
THAP9-AS1	GSK3B	0.263412	turquoise	turquoise
THAP9-AS1	GSPT1	0.142219	turquoise	turquoise
THAP9-AS1	GSR	0.141384	turquoise	turquoise
THAP9-AS1	GSTA4	0.164993	turquoise	turquoise
THAP9-AS1	GSTCD	0.197034	turquoise	turquoise
THAP9-AS1	GTF2A1	0.291589	turquoise	turquoise
THAP9-AS1	GTF2B	0.189655	turquoise	turquoise
THAP9-AS1	GTF2F2	0.183429	turquoise	turquoise
THAP9-AS1	GTF2H1	0.180096	turquoise	turquoise
THAP9-AS1	GTF2H2	0.104267	turquoise	turquoise
THAP9-AS1	GTF2H2C	0.177049	turquoise	turquoise
THAP9-AS1	GTF2H3	0.250235	turquoise	turquoise
THAP9-AS1	GTF2I	0.10387	turquoise	turquoise
THAP9-AS1	GTF2IP1	0.139382	turquoise	turquoise
THAP9-AS1	GTF2IP4	0.142693	turquoise	turquoise
THAP9-AS1	GTF2IRD2	0.185242	turquoise	turquoise
THAP9-AS1	GTF2IRD2B	0.182824	turquoise	turquoise
THAP9-AS1	GTF3C1	0.103189	turquoise	turquoise
THAP9-AS1	GTF3C2	0.209665	turquoise	turquoise
THAP9-AS1	GTF3C3	0.246212	turquoise	turquoise
THAP9-AS1	GTF3C4	0.241229	turquoise	turquoise
THAP9-AS1	GTPBP10	0.327582	turquoise	turquoise
THAP9-AS1	GTPBP2	0.103396	turquoise	turquoise
THAP9-AS1	GTPBP4	0.158174	turquoise	turquoise
THAP9-AS1	GUCY1A1	0.168873	turquoise	turquoise
THAP9-AS1	GUF1	0.15457	turquoise	turquoise
THAP9-AS1	GULP1	0.173952	turquoise	turquoise
THAP9-AS1	GUSBP1	0.178687	turquoise	turquoise
THAP9-AS1	GUSBP5	0.197223	turquoise	turquoise
THAP9-AS1	GXYLT1	0.230125	turquoise	turquoise
THAP9-AS1	GZF1	0.279549	turquoise	turquoise
THAP9-AS1	H1.7	0.068392	turquoise	NA
THAP9-AS1	H2AZ2	0.170781	turquoise	turquoise
THAP9-AS1	H3.3A	0.175344	turquoise	NA
THAP9-AS1	H3.3B	0.196892	turquoise	NA
THAP9-AS1	H3C9P	0.132039	turquoise	turquoise
THAP9-AS1	H3P14	0.187098	turquoise	turquoise
THAP9-AS1	HACE1	0.269213	turquoise	turquoise
THAP9-AS1	HAND2.AS1	0.09011	turquoise	NA
THAP9-AS1	HARBI1	0.138959	turquoise	turquoise
THAP9-AS1	HARS2	0.133232	turquoise	turquoise
THAP9-AS1	HAT1	0.181299	turquoise	turquoise
THAP9-AS1	HAUS2	0.144843	turquoise	turquoise
THAP9-AS1	HAUS3	0.274469	turquoise	turquoise
THAP9-AS1	HAUS6	0.283331	turquoise	turquoise
THAP9-AS1	HAVCR1P1	0.174053	turquoise	turquoise
THAP9-AS1	HBP1	0.123947	turquoise	turquoise
THAP9-AS1	HBS1L	0.109378	turquoise	turquoise
THAP9-AS1	HCFC2	0.117123	turquoise	turquoise
THAP9-AS1	HCG11	0.130307	turquoise	turquoise
THAP9-AS1	HCG18	0.254201	turquoise	turquoise
THAP9-AS1	HDAC1P2	0.05921	turquoise	turquoise
THAP9-AS1	HDAC2	0.200447	turquoise	turquoise
THAP9-AS1	HDAC2.AS2	0.171151	turquoise	NA
THAP9-AS1	HDAC4	0.086965	turquoise	turquoise
THAP9-AS1	HDGFL3	0.182513	turquoise	turquoise
THAP9-AS1	HDHD2	0.146371	turquoise	turquoise
THAP9-AS1	HDLBP	0.045125	turquoise	turquoise
THAP9-AS1	HDX	0.265057	turquoise	turquoise
THAP9-AS1	HEATR1	0.218183	turquoise	turquoise
THAP9-AS1	HEATR5A	0.08903	turquoise	turquoise
THAP9-AS1	HEATR5B	0.244728	turquoise	turquoise
THAP9-AS1	HEATR6	0.209726	turquoise	turquoise
THAP9-AS1	HECA	0.154778	turquoise	turquoise
THAP9-AS1	HECTD1	0.099243	turquoise	turquoise
THAP9-AS1	HECTD2	0.235665	turquoise	turquoise
THAP9-AS1	HELQ	0.235964	turquoise	turquoise
THAP9-AS1	HELZ	0.128335	turquoise	turquoise
THAP9-AS1	HEPHL1	0.146266	turquoise	turquoise
THAP9-AS1	HERC1	0.08886	turquoise	turquoise
THAP9-AS1	HERC2	0.104404	turquoise	turquoise
THAP9-AS1	HERC2P2	0.159537	turquoise	turquoise
THAP9-AS1	HERC2P3	0.10272	turquoise	turquoise
THAP9-AS1	HERC2P9	0.179546	turquoise	turquoise
THAP9-AS1	HERC4	0.304707	turquoise	turquoise
THAP9-AS1	HERPUD2	0.247936	turquoise	turquoise
THAP9-AS1	HESX1	0.190633	turquoise	turquoise
THAP9-AS1	HEY1	0.035598	turquoise	turquoise
THAP9-AS1	HEY2	0.184931	turquoise	turquoise
THAP9-AS1	HFE	0.133601	turquoise	turquoise
THAP9-AS1	HFM1	0.158138	turquoise	turquoise
THAP9-AS1	HGSNAT	0.120654	turquoise	turquoise
THAP9-AS1	HIC2	0.073743	turquoise	turquoise
THAP9-AS1	HIF1A	0.164199	turquoise	turquoise
THAP9-AS1	HIF1A.AS1	0.037848	turquoise	NA
THAP9-AS1	HINT3	0.152993	turquoise	turquoise
THAP9-AS1	HIPK1	0.126185	turquoise	turquoise
THAP9-AS1	HIPK3	0.078155	turquoise	turquoise
THAP9-AS1	HIVEP1	0.159035	turquoise	turquoise
THAP9-AS1	HIVEP2	0.077219	turquoise	turquoise
THAP9-AS1	HIVEP3	0.169074	turquoise	turquoise
THAP9-AS1	HLA.F.AS1	0.187944	turquoise	NA
THAP9-AS1	HLCS	0.145274	turquoise	turquoise
THAP9-AS1	HLF	0.130696	turquoise	turquoise
THAP9-AS1	HLTF	0.222491	turquoise	turquoise
THAP9-AS1	HMBOX1	0.124615	turquoise	turquoise
THAP9-AS1	HMG20A	0.154733	turquoise	turquoise
THAP9-AS1	HMGB3P29	0.153408	turquoise	turquoise
THAP9-AS1	HMGN3.AS1	0.142915	turquoise	NA
THAP9-AS1	HMGN4	0.187221	turquoise	turquoise
THAP9-AS1	HMGN5	0.165819	turquoise	turquoise
THAP9-AS1	HMGXB4	0.257243	turquoise	turquoise
THAP9-AS1	HNRNPA1P45	0.061615	turquoise	turquoise
THAP9-AS1	HNRNPA2B1	0.150247	turquoise	turquoise
THAP9-AS1	HNRNPA3	0.223766	turquoise	turquoise
THAP9-AS1	HNRNPA3P12	0.074795	turquoise	turquoise
THAP9-AS1	HNRNPD	0.17539	turquoise	turquoise
THAP9-AS1	HNRNPDL	0.223856	turquoise	turquoise
THAP9-AS1	HNRNPH1	0.229144	turquoise	turquoise
THAP9-AS1	HNRNPH2	0.168702	turquoise	turquoise
THAP9-AS1	HNRNPH3	0.167907	turquoise	turquoise
THAP9-AS1	HNRNPK	0.20489	turquoise	turquoise
THAP9-AS1	HNRNPL	0.169897	turquoise	turquoise
THAP9-AS1	HNRNPLL	0.282073	turquoise	turquoise
THAP9-AS1	HNRNPR	0.20993	turquoise	turquoise
THAP9-AS1	HNRNPU	0.228982	turquoise	turquoise
THAP9-AS1	HNRNPUL1	0.130056	turquoise	turquoise
THAP9-AS1	HOMEZ	0.148119	turquoise	turquoise
THAP9-AS1	HOOK3	0.129838	turquoise	turquoise
THAP9-AS1	HOXA3	0.160945	turquoise	turquoise
THAP9-AS1	HOXA5	0.132854	turquoise	turquoise
THAP9-AS1	HOXB3	0.100761	turquoise	turquoise
THAP9-AS1	HP1BP3	0.317043	turquoise	turquoise
THAP9-AS1	HPS3	0.26806	turquoise	turquoise
THAP9-AS1	HPS5	0.17877	turquoise	turquoise
THAP9-AS1	HS2ST1	0.311145	turquoise	turquoise
THAP9-AS1	HSD17B4	0.090643	turquoise	turquoise
THAP9-AS1	HSDL1	0.239933	turquoise	turquoise
THAP9-AS1	HSF2	0.165685	turquoise	turquoise
THAP9-AS1	HSP90AA1	0.170512	turquoise	turquoise
THAP9-AS1	HSP90AB2P	0.093939	turquoise	turquoise
THAP9-AS1	HSP90B1	0.148332	turquoise	turquoise
THAP9-AS1	HSP90B2P	0.186079	turquoise	turquoise
THAP9-AS1	HSPA13	0.188544	turquoise	turquoise
THAP9-AS1	HSPA14	0.290571	turquoise	turquoise
THAP9-AS1	HSPA4	0.144454	turquoise	turquoise
THAP9-AS1	HSPA9	0.128411	turquoise	turquoise
THAP9-AS1	HTD2	0.167069	turquoise	turquoise
THAP9-AS1	HTR7P1	0.156304	turquoise	turquoise
THAP9-AS1	HTT	0.091083	turquoise	turquoise
THAP9-AS1	HUS1	0.169487	turquoise	turquoise
THAP9-AS1	HUWE1	0.124606	turquoise	turquoise
THAP9-AS1	HYKK	0.12358	turquoise	turquoise
THAP9-AS1	IARS1	0.155993	turquoise	turquoise
THAP9-AS1	IARS2	0.079393	turquoise	turquoise
THAP9-AS1	IBA57	0.104505	turquoise	turquoise
THAP9-AS1	IBTK	0.186232	turquoise	turquoise
THAP9-AS1	ICA1L	0.128772	turquoise	turquoise
THAP9-AS1	ICE1	0.290998	turquoise	turquoise
THAP9-AS1	ICE2	0.249275	turquoise	turquoise
THAP9-AS1	IDE	0.124139	turquoise	turquoise
THAP9-AS1	IDS	0.170745	turquoise	turquoise
THAP9-AS1	IFNA20P	0.145743	turquoise	turquoise
THAP9-AS1	IFNAR1	0.111609	turquoise	turquoise
THAP9-AS1	IFRD1	0.180076	turquoise	turquoise
THAP9-AS1	IFT57	0.178421	turquoise	turquoise
THAP9-AS1	IFT74	0.274554	turquoise	turquoise
THAP9-AS1	IFT80	0.286292	turquoise	turquoise
THAP9-AS1	IGSF10	0.094577	turquoise	turquoise
THAP9-AS1	IKZF2	0.173205	turquoise	turquoise
THAP9-AS1	IKZF4	0.12112	turquoise	turquoise
THAP9-AS1	IKZF5	0.299767	turquoise	turquoise
THAP9-AS1	IL13RA2	0.09207	turquoise	turquoise
THAP9-AS1	IL17RA	0.085712	turquoise	turquoise
THAP9-AS1	IL1RAP	0.184331	turquoise	turquoise
THAP9-AS1	IL6ST	0.126484	turquoise	turquoise
THAP9-AS1	IL7	0.192237	turquoise	turquoise
THAP9-AS1	IMPA1	0.166839	turquoise	turquoise
THAP9-AS1	IMPACT	0.244246	turquoise	turquoise
THAP9-AS1	IMPG2	0.161256	turquoise	turquoise
THAP9-AS1	ING1	0.158601	turquoise	turquoise
THAP9-AS1	ING3	0.201657	turquoise	turquoise
THAP9-AS1	INIP	0.277348	turquoise	turquoise
THAP9-AS1	INO80	0.181495	turquoise	turquoise
THAP9-AS1	INO80D	0.245918	turquoise	turquoise
THAP9-AS1	INPP4A	0.133811	turquoise	turquoise
THAP9-AS1	INPP5B	0.156835	turquoise	turquoise
THAP9-AS1	INPP5E	0.114915	turquoise	turquoise
THAP9-AS1	INPP5F	0.238534	turquoise	turquoise
THAP9-AS1	INSIG2	0.181982	turquoise	turquoise
THAP9-AS1	INSR	0.131272	turquoise	turquoise
THAP9-AS1	INTS10	0.138978	turquoise	turquoise
THAP9-AS1	INTS12	0.205086	turquoise	turquoise
THAP9-AS1	INTS13	0.1765	turquoise	turquoise
THAP9-AS1	INTS14	0.211399	turquoise	turquoise
THAP9-AS1	INTS2	0.229516	turquoise	turquoise
THAP9-AS1	INTS4	0.168876	turquoise	turquoise
THAP9-AS1	INTS6	0.179757	turquoise	turquoise
THAP9-AS1	INTS6.AS1	0.182497	turquoise	NA
THAP9-AS1	INTS7	0.212166	turquoise	turquoise
THAP9-AS1	INTS8	0.303501	turquoise	turquoise
THAP9-AS1	INVS	0.073894	turquoise	turquoise
THAP9-AS1	IP6K1	0.1356	turquoise	turquoise
THAP9-AS1	IPMK	0.179384	turquoise	turquoise
THAP9-AS1	IPO11	0.199468	turquoise	turquoise
THAP9-AS1	IPO7	0.141436	turquoise	turquoise
THAP9-AS1	IPO8	0.290906	turquoise	turquoise
THAP9-AS1	IPO9	0.212115	turquoise	turquoise
THAP9-AS1	IPP	0.139741	turquoise	turquoise
THAP9-AS1	IQCB1	0.197393	turquoise	turquoise
THAP9-AS1	IQCG	0.167288	turquoise	turquoise
THAP9-AS1	IQCH.AS1	0.177061	turquoise	NA
THAP9-AS1	IQCK	0.209779	turquoise	turquoise
THAP9-AS1	IQGAP1	0.163995	turquoise	turquoise
THAP9-AS1	IRAG1.AS1	0.095274	turquoise	NA
THAP9-AS1	IRAK1BP1	0.220066	turquoise	turquoise
THAP9-AS1	IRAK4	0.23703	turquoise	turquoise
THAP9-AS1	IREB2	0.207618	turquoise	turquoise
THAP9-AS1	IRF2	0.164659	turquoise	turquoise
THAP9-AS1	IRF2BP2	0.19902	turquoise	turquoise
THAP9-AS1	IRF2BPL	0.162435	turquoise	turquoise
THAP9-AS1	IRGQ	0.157976	turquoise	turquoise
THAP9-AS1	ISG20L2	0.167697	turquoise	turquoise
THAP9-AS1	ITCH	0.204292	turquoise	turquoise
THAP9-AS1	ITFG2.AS1	0.091339	turquoise	NA
THAP9-AS1	ITGA2B	0.009752	turquoise	turquoise
THAP9-AS1	ITGA6	0.177714	turquoise	turquoise
THAP9-AS1	ITGA9	0.115198	turquoise	turquoise
THAP9-AS1	ITGAV	0.114551	turquoise	turquoise
THAP9-AS1	ITGB3BP	0.204628	turquoise	turquoise
THAP9-AS1	ITGB8	0.198519	turquoise	turquoise
THAP9-AS1	ITPR2	0.1647	turquoise	turquoise
THAP9-AS1	ITPRID2	0.154358	turquoise	turquoise
THAP9-AS1	ITSN2	0.106137	turquoise	turquoise
THAP9-AS1	IVNS1ABP	0.180161	turquoise	turquoise
THAP9-AS1	JADE1	0.089834	turquoise	turquoise
THAP9-AS1	JAK2	0.09058	turquoise	turquoise
THAP9-AS1	JKAMP	0.17591	turquoise	turquoise
THAP9-AS1	JMJD1C	0.178147	turquoise	turquoise
THAP9-AS1	JMY	0.247623	turquoise	turquoise
THAP9-AS1	JOSD1	0.16898	turquoise	turquoise
THAP9-AS1	JPX	0.218614	turquoise	turquoise
THAP9-AS1	JRKL	0.210396	turquoise	turquoise
THAP9-AS1	KANSL1	0.188497	turquoise	turquoise
THAP9-AS1	KANSL1L	0.130116	turquoise	turquoise
THAP9-AS1	KANSL2	0.178332	turquoise	turquoise
THAP9-AS1	KANSL3	0.142554	turquoise	turquoise
THAP9-AS1	KAT6A	0.206303	turquoise	turquoise
THAP9-AS1	KAT6B	0.141917	turquoise	turquoise
THAP9-AS1	KAT7	0.193657	turquoise	turquoise
THAP9-AS1	KATNBL1	0.181669	turquoise	turquoise
THAP9-AS1	KATNBL1P5	0.100527	turquoise	turquoise
THAP9-AS1	KAZN	0.159354	turquoise	turquoise
THAP9-AS1	KBTBD2	0.14816	turquoise	turquoise
THAP9-AS1	KBTBD3	0.176755	turquoise	turquoise
THAP9-AS1	KBTBD4	0.138637	turquoise	turquoise
THAP9-AS1	KBTBD6	0.196382	turquoise	turquoise
THAP9-AS1	KBTBD7	0.177071	turquoise	turquoise
THAP9-AS1	KCND3	0.095836	turquoise	turquoise
THAP9-AS1	KCNE1	0.14963	turquoise	turquoise
THAP9-AS1	KCNIP4	0.194059	turquoise	turquoise
THAP9-AS1	KCNJ2	0.144051	turquoise	turquoise
THAP9-AS1	KCNJ9	0.168464	turquoise	turquoise
THAP9-AS1	KCNMB3	0.16445	turquoise	turquoise
THAP9-AS1	KCNMB4	0.149541	turquoise	turquoise
THAP9-AS1	KCNQ3	0.155988	turquoise	turquoise
THAP9-AS1	KCNRG	0.195497	turquoise	turquoise
THAP9-AS1	KCTD18	0.140728	turquoise	turquoise
THAP9-AS1	KCTD21.AS1	0.115879	turquoise	NA
THAP9-AS1	KCTD7	0.153993	turquoise	turquoise
THAP9-AS1	KCTD9	0.181697	turquoise	turquoise
THAP9-AS1	KDM1B	0.272544	turquoise	turquoise
THAP9-AS1	KDM2A	0.222268	turquoise	turquoise
THAP9-AS1	KDM3A	0.284281	turquoise	turquoise
THAP9-AS1	KDM3B	0.203556	turquoise	turquoise
THAP9-AS1	KDM4A	0.129883	turquoise	turquoise
THAP9-AS1	KDM4C	0.218646	turquoise	turquoise
THAP9-AS1	KDM5A	0.255602	turquoise	turquoise
THAP9-AS1	KDM5B	0.206058	turquoise	turquoise
THAP9-AS1	KDM6A	0.293337	turquoise	turquoise
THAP9-AS1	KDM7A	0.13952	turquoise	turquoise
THAP9-AS1	KDSR	0.166261	turquoise	turquoise
THAP9-AS1	KHDRBS1	0.242497	turquoise	turquoise
THAP9-AS1	KHNYN	0.139688	turquoise	turquoise
THAP9-AS1	KIAA0040	0.11654	turquoise	turquoise
THAP9-AS1	KIAA0100	0.085164	turquoise	turquoise
THAP9-AS1	KIAA0232	0.13034	turquoise	turquoise
THAP9-AS1	KIAA0586	0.308155	turquoise	turquoise
THAP9-AS1	KIAA1109	0.153243	turquoise	turquoise
THAP9-AS1	KIAA1143	0.264286	turquoise	turquoise
THAP9-AS1	KIAA1191	0.210139	turquoise	turquoise
THAP9-AS1	KIAA1328	0.281916	turquoise	turquoise
THAP9-AS1	KIAA1586	0.209701	turquoise	turquoise
THAP9-AS1	KIAA1671	0.17987	turquoise	turquoise
THAP9-AS1	KIAA1841	0.104794	turquoise	turquoise
THAP9-AS1	KIAA2026	0.280074	turquoise	turquoise
THAP9-AS1	KIDINS220	0.20086	turquoise	turquoise
THAP9-AS1	KIF13A	0.072122	turquoise	turquoise
THAP9-AS1	KIF20B	0.236048	turquoise	turquoise
THAP9-AS1	KIF21A	0.13845	turquoise	turquoise
THAP9-AS1	KIF2A	0.178803	turquoise	turquoise
THAP9-AS1	KIF3A	0.187136	turquoise	turquoise
THAP9-AS1	KIF3B	0.135334	turquoise	turquoise
THAP9-AS1	KIF4B	0.036974	turquoise	turquoise
THAP9-AS1	KIF5B	0.120282	turquoise	turquoise
THAP9-AS1	KIF6	0.138517	turquoise	turquoise
THAP9-AS1	KIN	0.295719	turquoise	turquoise
THAP9-AS1	KITLG	0.158793	turquoise	turquoise
THAP9-AS1	KIZ	0.153441	turquoise	turquoise
THAP9-AS1	KLF12	0.156512	turquoise	turquoise
THAP9-AS1	KLF6	0.123774	turquoise	turquoise
THAP9-AS1	KLF7	0.131627	turquoise	turquoise
THAP9-AS1	KLF8	0.085757	turquoise	turquoise
THAP9-AS1	KLHDC1	0.167552	turquoise	turquoise
THAP9-AS1	KLHDC10	0.156538	turquoise	turquoise
THAP9-AS1	KLHDC2	0.152502	turquoise	turquoise
THAP9-AS1	KLHL12	0.268128	turquoise	turquoise
THAP9-AS1	KLHL15	0.151603	turquoise	turquoise
THAP9-AS1	KLHL18	0.130211	turquoise	turquoise
THAP9-AS1	KLHL2	0.179349	turquoise	turquoise
THAP9-AS1	KLHL21	0.039552	turquoise	turquoise
THAP9-AS1	KLHL23	0.176514	turquoise	turquoise
THAP9-AS1	KLHL24	0.103241	turquoise	turquoise
THAP9-AS1	KLHL28	0.24399	turquoise	turquoise
THAP9-AS1	KLHL36	0.088873	turquoise	turquoise
THAP9-AS1	KLHL42	0.246397	turquoise	turquoise
THAP9-AS1	KLHL7	0.314299	turquoise	turquoise
THAP9-AS1	KLHL9	0.332549	turquoise	turquoise
THAP9-AS1	KMT2A	0.169755	turquoise	turquoise
THAP9-AS1	KMT2C	0.194551	turquoise	turquoise
THAP9-AS1	KMT2E	0.236163	turquoise	turquoise
THAP9-AS1	KMT5A	0.167294	turquoise	turquoise
THAP9-AS1	KMT5B	0.349973	turquoise	turquoise
THAP9-AS1	KNTC1	0.176548	turquoise	turquoise
THAP9-AS1	KPNA1	0.08555	turquoise	turquoise
THAP9-AS1	KPNA4P1	0.101642	turquoise	turquoise
THAP9-AS1	KPNA5	0.210417	turquoise	turquoise
THAP9-AS1	KPNA6	0.168696	turquoise	turquoise
THAP9-AS1	KPNB1	0.136849	turquoise	turquoise
THAP9-AS1	KRAS	0.171097	turquoise	turquoise
THAP9-AS1	KRBOX4	0.195522	turquoise	turquoise
THAP9-AS1	KRCC1	0.158983	turquoise	turquoise
THAP9-AS1	KRIT1	0.30238	turquoise	turquoise
THAP9-AS1	KRR1	0.285877	turquoise	turquoise
THAP9-AS1	KRT18P31	0.071832	turquoise	turquoise
THAP9-AS1	KRT24	0.05754	turquoise	turquoise
THAP9-AS1	KRTAP29.1	0.081013	turquoise	NA
THAP9-AS1	KTN1	0.144447	turquoise	turquoise
THAP9-AS1	KYAT3	0.189731	turquoise	turquoise
THAP9-AS1	L3HYPDH	0.093183	turquoise	turquoise
THAP9-AS1	L3MBTL3	0.179939	turquoise	turquoise
THAP9-AS1	LACTB2	0.080129	turquoise	turquoise
THAP9-AS1	LAMP2	0.206331	turquoise	turquoise
THAP9-AS1	LAMTOR3	0.27858	turquoise	turquoise
THAP9-AS1	LANCL1	0.220057	turquoise	turquoise
THAP9-AS1	LANCL2	0.168691	turquoise	turquoise
THAP9-AS1	LARGE1	0.112676	turquoise	turquoise
THAP9-AS1	LARP1	0.090604	turquoise	turquoise
THAP9-AS1	LARP1B	0.203778	turquoise	turquoise
THAP9-AS1	LARP4	0.158664	turquoise	turquoise
THAP9-AS1	LARP4B	0.255936	turquoise	turquoise
THAP9-AS1	LARP7	0.173725	turquoise	turquoise
THAP9-AS1	LARS1	0.219347	turquoise	turquoise
THAP9-AS1	LATS1	0.314431	turquoise	turquoise
THAP9-AS1	LCA5	0.170939	turquoise	turquoise
THAP9-AS1	LCLAT1	0.22679	turquoise	turquoise
THAP9-AS1	LCOR	0.202152	turquoise	turquoise
THAP9-AS1	LCORL	0.24439	turquoise	turquoise
THAP9-AS1	LDAH	0.136147	turquoise	turquoise
THAP9-AS1	LDHAL6B	0.144774	turquoise	turquoise
THAP9-AS1	LDLR	0.042512	turquoise	turquoise
THAP9-AS1	LDLRAD3	0.17712	turquoise	turquoise
THAP9-AS1	LDLRAD4	0.161036	turquoise	turquoise
THAP9-AS1	LEMD1.AS1	0.14914	turquoise	NA
THAP9-AS1	LEMD3	0.292387	turquoise	turquoise
THAP9-AS1	LETM2	0.176014	turquoise	turquoise
THAP9-AS1	LETMD1	0.110332	turquoise	turquoise
THAP9-AS1	LGALS8	0.137199	turquoise	turquoise
THAP9-AS1	LGR4	0.150377	turquoise	turquoise
THAP9-AS1	LHFPL2	0.165167	turquoise	turquoise
THAP9-AS1	LIAS	0.128011	turquoise	turquoise
THAP9-AS1	LIFR	0.120623	turquoise	turquoise
THAP9-AS1	LIG4	0.174592	turquoise	turquoise
THAP9-AS1	LIMD1	0.137606	turquoise	turquoise
THAP9-AS1	LIMS1.AS1	0.124729	turquoise	NA
THAP9-AS1	LIN52	0.093763	turquoise	turquoise
THAP9-AS1	LIN54	0.351403	turquoise	turquoise
THAP9-AS1	LIN7C	0.182869	turquoise	turquoise
THAP9-AS1	LIN9	0.239007	turquoise	turquoise
THAP9-AS1	LINC.PINT	0.161961	turquoise	NA
THAP9-AS1	LINC00205	0.186366	turquoise	turquoise
THAP9-AS1	LINC00216	0.184114	turquoise	turquoise
THAP9-AS1	LINC00323	0.177457	turquoise	turquoise
THAP9-AS1	LINC00467	0.137699	turquoise	turquoise
THAP9-AS1	LINC00476	0.155249	turquoise	turquoise
THAP9-AS1	LINC00506	0.180726	turquoise	turquoise
THAP9-AS1	LINC00536	0.185258	turquoise	turquoise
THAP9-AS1	LINC00539	0.179781	turquoise	turquoise
THAP9-AS1	LINC00562	0.130296	turquoise	turquoise
THAP9-AS1	LINC00574	0.108331	turquoise	turquoise
THAP9-AS1	LINC00601	0.020879	turquoise	turquoise
THAP9-AS1	LINC00641	0.083651	turquoise	turquoise
THAP9-AS1	LINC00662	0.214488	turquoise	turquoise
THAP9-AS1	LINC00664	0.159838	turquoise	turquoise
THAP9-AS1	LINC00863	0.152165	turquoise	turquoise
THAP9-AS1	LINC00886	0.128248	turquoise	turquoise
THAP9-AS1	LINC00907	0.109022	turquoise	turquoise
THAP9-AS1	LINC00909	0.178387	turquoise	turquoise
THAP9-AS1	LINC00910	0.134068	turquoise	turquoise
THAP9-AS1	LINC00921	0.06667	turquoise	turquoise
THAP9-AS1	LINC00933	0.146963	turquoise	turquoise
THAP9-AS1	LINC01006	0.114192	turquoise	turquoise
THAP9-AS1	LINC01011	0.173319	turquoise	turquoise
THAP9-AS1	LINC01184	0.188398	turquoise	turquoise
THAP9-AS1	LINC01229	0.150717	turquoise	turquoise
THAP9-AS1	LINC01265	0.183459	turquoise	turquoise
THAP9-AS1	LINC01266	0.184885	turquoise	turquoise
THAP9-AS1	LINC01278	0.165183	turquoise	turquoise
THAP9-AS1	LINC01291	0.095348	turquoise	turquoise
THAP9-AS1	LINC01374	0.123838	turquoise	turquoise
THAP9-AS1	LINC01587	0.168713	turquoise	turquoise
THAP9-AS1	LINC01801	0.133699	turquoise	turquoise
THAP9-AS1	LINC01864	0.076085	turquoise	turquoise
THAP9-AS1	LINC01909	0.187492	turquoise	turquoise
THAP9-AS1	LINC01963	0.135892	turquoise	turquoise
THAP9-AS1	LINC01990	0.148379	turquoise	turquoise
THAP9-AS1	LINC02035	0.124414	turquoise	turquoise
THAP9-AS1	LINC02060	0.05569	turquoise	turquoise
THAP9-AS1	LINC02204	0.155198	turquoise	turquoise
THAP9-AS1	LINC02207	0.099134	turquoise	turquoise
THAP9-AS1	LINC02210	0.176122	turquoise	turquoise
THAP9-AS1	LINC02328	0.176454	turquoise	turquoise
THAP9-AS1	LINC02453	0.194668	turquoise	turquoise
THAP9-AS1	LINC02518	0.181062	turquoise	turquoise
THAP9-AS1	LINC02691	0.115404	turquoise	turquoise
THAP9-AS1	LINC02709	0.100734	turquoise	turquoise
THAP9-AS1	LINC02872	0.153167	turquoise	turquoise
THAP9-AS1	LINS1	0.212279	turquoise	turquoise
THAP9-AS1	LIPI	0.159326	turquoise	turquoise
THAP9-AS1	LIPT1	0.195785	turquoise	turquoise
THAP9-AS1	LIPT2	0.141913	turquoise	turquoise
THAP9-AS1	LMAN1	0.264048	turquoise	turquoise
THAP9-AS1	LMBR1	0.319999	turquoise	turquoise
THAP9-AS1	LMBRD1	0.154544	turquoise	turquoise
THAP9-AS1	LMBRD2	0.199043	turquoise	turquoise
THAP9-AS1	LMCD1.AS1	0.083656	turquoise	NA
THAP9-AS1	LMTK2	0.162871	turquoise	turquoise
THAP9-AS1	LNC.LBCS	0.140805	turquoise	NA
THAP9-AS1	LNPK	0.088721	turquoise	turquoise
THAP9-AS1	LNX1	0.170376	turquoise	turquoise
THAP9-AS1	LOC100128108	0.182423	turquoise	turquoise
THAP9-AS1	LOC100128568	0.17869	turquoise	turquoise
THAP9-AS1	LOC100128939	0.172674	turquoise	turquoise
THAP9-AS1	LOC100129878	0.15594	turquoise	turquoise
THAP9-AS1	LOC100130550	0.12102	turquoise	turquoise
THAP9-AS1	LOC100287896	0.162694	turquoise	turquoise
THAP9-AS1	LOC100289518	0.166518	turquoise	turquoise
THAP9-AS1	LOC100419073	0.134524	turquoise	turquoise
THAP9-AS1	LOC100419503	0.15659	turquoise	turquoise
THAP9-AS1	LOC100419515	0.168564	turquoise	turquoise
THAP9-AS1	LOC100419654	0.098445	turquoise	turquoise
THAP9-AS1	LOC100419824	0.162425	turquoise	turquoise
THAP9-AS1	LOC100419831	0.192965	turquoise	turquoise
THAP9-AS1	LOC100420680	0.095678	turquoise	turquoise
THAP9-AS1	LOC100420864	0.168197	turquoise	turquoise
THAP9-AS1	LOC100420869	0.042074	turquoise	turquoise
THAP9-AS1	LOC100420981	0.183284	turquoise	turquoise
THAP9-AS1	LOC100422204	0.139066	turquoise	turquoise
THAP9-AS1	LOC100422614	0.108679	turquoise	turquoise
THAP9-AS1	LOC100505549	0.187895	turquoise	turquoise
THAP9-AS1	LOC100506083	0.090832	turquoise	turquoise
THAP9-AS1	LOC100506606	0.184987	turquoise	turquoise
THAP9-AS1	LOC100507053	0.168353	turquoise	turquoise
THAP9-AS1	LOC100507156	0.135208	turquoise	turquoise
THAP9-AS1	LOC100507283	0.135728	turquoise	turquoise
THAP9-AS1	LOC100507291	0.148766	turquoise	turquoise
THAP9-AS1	LOC100507477	0.086066	turquoise	turquoise
THAP9-AS1	LOC100533643	0.043125	turquoise	turquoise
THAP9-AS1	LOC100631242	0.13763	turquoise	turquoise
THAP9-AS1	LOC100996419	0.183886	turquoise	turquoise
THAP9-AS1	LOC101926913	0.166619	turquoise	turquoise
THAP9-AS1	LOC101926933	0.16483	turquoise	turquoise
THAP9-AS1	LOC101926977	0.189735	turquoise	turquoise
THAP9-AS1	LOC101927020	0.108687	turquoise	turquoise
THAP9-AS1	LOC101927060	0.102768	turquoise	turquoise
THAP9-AS1	LOC101927124	0.159194	turquoise	turquoise
THAP9-AS1	LOC101927151	0.136364	turquoise	turquoise
THAP9-AS1	LOC101927189	0.179999	turquoise	turquoise
THAP9-AS1	LOC101927237	0.17288	turquoise	turquoise
THAP9-AS1	LOC101927322	0.145334	turquoise	turquoise
THAP9-AS1	LOC101927556	0.146588	turquoise	turquoise
THAP9-AS1	LOC101927636	0.17479	turquoise	turquoise
THAP9-AS1	LOC101927692	0.140751	turquoise	turquoise
THAP9-AS1	LOC101927751	0.174863	turquoise	turquoise
THAP9-AS1	LOC101927815	0.022974	turquoise	turquoise
THAP9-AS1	LOC101928053	0.182189	turquoise	turquoise
THAP9-AS1	LOC101928063	0.072698	turquoise	turquoise
THAP9-AS1	LOC101928118	0.077925	turquoise	turquoise
THAP9-AS1	LOC101928371	0.132223	turquoise	turquoise
THAP9-AS1	LOC101928909	0.155437	turquoise	turquoise
THAP9-AS1	LOC101928988	0.033488	turquoise	turquoise
THAP9-AS1	LOC101929054	0.135366	turquoise	turquoise
THAP9-AS1	LOC101929089	0.088056	turquoise	turquoise
THAP9-AS1	LOC101929109	0.089127	turquoise	turquoise
THAP9-AS1	LOC101929140	0.150093	turquoise	turquoise
THAP9-AS1	LOC101929268	0.144819	turquoise	turquoise
THAP9-AS1	LOC101929657	0.170255	turquoise	turquoise
THAP9-AS1	LOC101929709	0.197006	turquoise	turquoise
THAP9-AS1	LOC101929710	0.146628	turquoise	turquoise
THAP9-AS1	LOC101930085	0.147914	turquoise	turquoise
THAP9-AS1	LOC101930275	0.192961	turquoise	turquoise
THAP9-AS1	LOC102546294	0.130356	turquoise	turquoise
THAP9-AS1	LOC102606465	0.182692	turquoise	turquoise
THAP9-AS1	LOC102724421	0.124488	turquoise	turquoise
THAP9-AS1	LOC102724593	0.12784	turquoise	turquoise
THAP9-AS1	LOC103344931	0.060876	turquoise	turquoise
THAP9-AS1	LOC105369147	0.175427	turquoise	turquoise
THAP9-AS1	LOC105372482	0.124399	turquoise	turquoise
THAP9-AS1	LOC105374618	0.056653	turquoise	turquoise
THAP9-AS1	LOC105375614	0.092611	turquoise	turquoise
THAP9-AS1	LOC105375903	0.043397	turquoise	turquoise
THAP9-AS1	LOC105376748	0.021982	turquoise	turquoise
THAP9-AS1	LOC105377623	0.147922	turquoise	turquoise
THAP9-AS1	LOC105378083	0.158791	turquoise	turquoise
THAP9-AS1	LOC105378721	0.185502	turquoise	turquoise
THAP9-AS1	LOC106699570	0.133914	turquoise	turquoise
THAP9-AS1	LOC107986114	0.153567	turquoise	turquoise
THAP9-AS1	LOC112268269	0.149907	turquoise	turquoise
THAP9-AS1	LOC114841040	0.128976	turquoise	turquoise
THAP9-AS1	LOC152048	0.125841	turquoise	turquoise
THAP9-AS1	LOC257396	0.078735	turquoise	turquoise
THAP9-AS1	LOC283387	0.09863	turquoise	turquoise
THAP9-AS1	LOC284685	0.143854	turquoise	turquoise
THAP9-AS1	LOC285593	0.130236	turquoise	turquoise
THAP9-AS1	LOC285626	0.158524	turquoise	turquoise
THAP9-AS1	LOC339803	0.117917	turquoise	turquoise
THAP9-AS1	LOC340512	0.121606	turquoise	turquoise
THAP9-AS1	LOC374443	0.189292	turquoise	turquoise
THAP9-AS1	LOC390332	0.081451	turquoise	turquoise
THAP9-AS1	LOC392266	0.124901	turquoise	turquoise
THAP9-AS1	LOC441666	0.173978	turquoise	turquoise
THAP9-AS1	LOC642361	0.154742	turquoise	turquoise
THAP9-AS1	LOC643630	0.104757	turquoise	turquoise
THAP9-AS1	LOC646674	0.083479	turquoise	turquoise
THAP9-AS1	LOC648987	0.091413	turquoise	turquoise
THAP9-AS1	LOH12CR2	0.09936	turquoise	turquoise
THAP9-AS1	LONRF1	0.140124	turquoise	turquoise
THAP9-AS1	LONRF3	0.078254	turquoise	turquoise
THAP9-AS1	LOXL1.AS1	0.193763	turquoise	NA
THAP9-AS1	LPAR6	0.17919	turquoise	turquoise
THAP9-AS1	LPCAT2	0.195955	turquoise	turquoise
THAP9-AS1	LPIN2	0.12482	turquoise	turquoise
THAP9-AS1	LPP	0.145313	turquoise	turquoise
THAP9-AS1	LPP.AS2	0.141786	turquoise	NA
THAP9-AS1	LRCH1	0.168665	turquoise	turquoise
THAP9-AS1	LRCH3	0.304651	turquoise	turquoise
THAP9-AS1	LRFN5	0.172564	turquoise	turquoise
THAP9-AS1	LRIF1	0.214387	turquoise	turquoise
THAP9-AS1	LRIG1	0.132357	turquoise	turquoise
THAP9-AS1	LRIG2	0.220373	turquoise	turquoise
THAP9-AS1	LRIG3	0.167385	turquoise	turquoise
THAP9-AS1	LRP12	0.16145	turquoise	turquoise
THAP9-AS1	LRP2BP	0.191843	turquoise	turquoise
THAP9-AS1	LRP6	0.213355	turquoise	turquoise
THAP9-AS1	LRPPRC	0.148114	turquoise	turquoise
THAP9-AS1	LRRC3.DT	0.012187	turquoise	NA
THAP9-AS1	LRRC37A	0.154099	turquoise	turquoise
THAP9-AS1	LRRC37A17P	0.088329	turquoise	turquoise
THAP9-AS1	LRRC37B	0.184715	turquoise	turquoise
THAP9-AS1	LRRC40	0.243098	turquoise	turquoise
THAP9-AS1	LRRC41	0.138257	turquoise	turquoise
THAP9-AS1	LRRC43	0.065181	turquoise	turquoise
THAP9-AS1	LRRC49	0.190083	turquoise	turquoise
THAP9-AS1	LRRC53	0.076267	turquoise	turquoise
THAP9-AS1	LRRC57	0.294531	turquoise	turquoise
THAP9-AS1	LRRC58	0.276068	turquoise	turquoise
THAP9-AS1	LRRC6	0.159313	turquoise	turquoise
THAP9-AS1	LRRC8B	0.160539	turquoise	turquoise
THAP9-AS1	LRRC8D	0.185482	turquoise	turquoise
THAP9-AS1	LRRC9	0.062844	turquoise	turquoise
THAP9-AS1	LRRCC1	0.220422	turquoise	turquoise
THAP9-AS1	LRRD1	0.182081	turquoise	turquoise
THAP9-AS1	LRRFIP2	0.138669	turquoise	turquoise
THAP9-AS1	LRRIQ1	0.189265	turquoise	turquoise
THAP9-AS1	LRRK1	0.13924	turquoise	turquoise
THAP9-AS1	LRRTM2	0.124769	turquoise	turquoise
THAP9-AS1	LSG1	0.16622	turquoise	turquoise
THAP9-AS1	LSM11	0.20773	turquoise	turquoise
THAP9-AS1	LSM12	0.175394	turquoise	turquoise
THAP9-AS1	LSM14A	0.312863	turquoise	turquoise
THAP9-AS1	LTN1	0.257194	turquoise	turquoise
THAP9-AS1	LTV1	0.171888	turquoise	turquoise
THAP9-AS1	LUC7L2	0.248628	turquoise	turquoise
THAP9-AS1	LURAP1	0.162584	turquoise	turquoise
THAP9-AS1	LUZP1	0.130136	turquoise	turquoise
THAP9-AS1	LY75	0.198743	turquoise	turquoise
THAP9-AS1	LYG2	0.152056	turquoise	turquoise
THAP9-AS1	LYPLA1	0.181697	turquoise	turquoise
THAP9-AS1	LYRM2	0.283067	turquoise	turquoise
THAP9-AS1	LYSMD1	0.136466	turquoise	turquoise
THAP9-AS1	LYSMD3	0.241787	turquoise	turquoise
THAP9-AS1	LYST	0.111839	turquoise	turquoise
THAP9-AS1	LZIC	0.260436	turquoise	turquoise
THAP9-AS1	LZTFL1	0.234348	turquoise	turquoise
THAP9-AS1	M6PR	0.146891	turquoise	turquoise
THAP9-AS1	MACC1.AS1	0.078674	turquoise	NA
THAP9-AS1	MACF1	0.123259	turquoise	turquoise
THAP9-AS1	MACO1	0.159107	turquoise	turquoise
THAP9-AS1	MACROD2	0.173748	turquoise	turquoise
THAP9-AS1	MAFTRR	0.152727	turquoise	turquoise
THAP9-AS1	MAGEE2	0.118884	turquoise	turquoise
THAP9-AS1	MAGI1	0.153226	turquoise	turquoise
THAP9-AS1	MAGI1.IT1	0.19674	turquoise	NA
THAP9-AS1	MAGI2	0.113582	turquoise	turquoise
THAP9-AS1	MAGOHB	0.236279	turquoise	turquoise
THAP9-AS1	MAGT1	0.266093	turquoise	turquoise
THAP9-AS1	MAK	0.169521	turquoise	turquoise
THAP9-AS1	MAK16	0.232369	turquoise	turquoise
THAP9-AS1	MALAT1	0.153339	turquoise	turquoise
THAP9-AS1	MALT1	0.291927	turquoise	turquoise
THAP9-AS1	MAMDC2.AS1	0.183103	turquoise	NA
THAP9-AS1	MAML1	0.199314	turquoise	turquoise
THAP9-AS1	MAML2	0.17909	turquoise	turquoise
THAP9-AS1	MAN1A2	0.097193	turquoise	turquoise
THAP9-AS1	MAN2A1	0.158039	turquoise	turquoise
THAP9-AS1	MANBA	0.144636	turquoise	turquoise
THAP9-AS1	MANEA	0.125866	turquoise	turquoise
THAP9-AS1	MANSC1	0.174092	turquoise	turquoise
THAP9-AS1	MAP10	0.159432	turquoise	turquoise
THAP9-AS1	MAP1LC3B2	0.143573	turquoise	turquoise
THAP9-AS1	MAP2	0.174133	turquoise	turquoise
THAP9-AS1	MAP2K4	0.265936	turquoise	turquoise
THAP9-AS1	MAP2K4P1	0.162305	turquoise	turquoise
THAP9-AS1	MAP2K5	0.128851	turquoise	turquoise
THAP9-AS1	MAP3K12	0.126	turquoise	turquoise
THAP9-AS1	MAP3K13	0.215812	turquoise	turquoise
THAP9-AS1	MAP3K2	0.243501	turquoise	turquoise
THAP9-AS1	MAP3K20.AS1	0.13634	turquoise	NA
THAP9-AS1	MAP3K4	0.24808	turquoise	turquoise
THAP9-AS1	MAP3K7	0.373025	turquoise	turquoise
THAP9-AS1	MAP4K2	0.115029	turquoise	turquoise
THAP9-AS1	MAP4K3	0.240329	turquoise	turquoise
[truncated: 2,651 more rows]

## Sheet: BRCA_tumor
gene1	gene2	correlation	module1	module2
THAP9-AS1	ABCC1	2.92e-06	yellow	yellow
THAP9-AS1	ABCE1	0.000555	yellow	yellow
THAP9-AS1	ABCF2	0.000132	yellow	yellow
THAP9-AS1	ABHD13	6.91e-05	yellow	yellow
THAP9-AS1	ABHD17B	3.56e-05	yellow	yellow
THAP9-AS1	ABI1	0.000255	yellow	yellow
THAP9-AS1	ABITRAM	0.000115	yellow	yellow
THAP9-AS1	ACOX1	7.62e-06	yellow	yellow
THAP9-AS1	ACP1	0.000253	yellow	yellow
THAP9-AS1	ACTG1P25	1.11e-07	yellow	yellow
THAP9-AS1	ACTR2	0.000326	yellow	yellow
THAP9-AS1	ACTR3	9.61e-05	yellow	yellow
THAP9-AS1	ACTR6	0.000265	yellow	yellow
THAP9-AS1	ADAM17	0.000128	yellow	yellow
THAP9-AS1	ADH5	0.000568	yellow	yellow
THAP9-AS1	ADK	2.77e-06	yellow	yellow
THAP9-AS1	ADO	1.34e-05	yellow	yellow
THAP9-AS1	ADPGK	1.41e-05	yellow	yellow
THAP9-AS1	AEBP2	3.76e-05	yellow	yellow
THAP9-AS1	AFG1L	4.9e-06	yellow	yellow
THAP9-AS1	AGFG1	0.000116	yellow	yellow
THAP9-AS1	AGK	0.000545	yellow	yellow
THAP9-AS1	AGO1	9.25e-05	yellow	yellow
THAP9-AS1	AGPAT5	6.4e-06	yellow	yellow
THAP9-AS1	AK4	6.65e-08	yellow	yellow
THAP9-AS1	AKIRIN1	0.000107	yellow	yellow
THAP9-AS1	AKIRIN2	0.000244	yellow	yellow
THAP9-AS1	ALAS1	1.74e-05	yellow	yellow
THAP9-AS1	ALDH18A1	2.71e-06	yellow	yellow
THAP9-AS1	ALG6	7.75e-05	yellow	yellow
THAP9-AS1	AMMECR1	6.5e-07	yellow	yellow
THAP9-AS1	ANAPC1	0.000232	yellow	yellow
THAP9-AS1	ANAPC10	0.000831	yellow	yellow
THAP9-AS1	ANKLE2	0.000224	yellow	yellow
THAP9-AS1	ANKRD13A	4.78e-05	yellow	yellow
THAP9-AS1	ANKRD18EP	2.35e-05	yellow	yellow
THAP9-AS1	ANKS1A	3.26e-05	yellow	yellow
THAP9-AS1	ANXA4	7.75e-06	yellow	yellow
THAP9-AS1	AP1S2	1.32e-06	yellow	yellow
THAP9-AS1	AP1S3	7.12e-07	yellow	yellow
THAP9-AS1	AP3S1	5.4e-07	yellow	yellow
THAP9-AS1	API5	0.000561	yellow	yellow
THAP9-AS1	APIP	4.4e-06	yellow	yellow
THAP9-AS1	ARCN1	3.29e-05	yellow	yellow
THAP9-AS1	AREL1	0.000141	yellow	yellow
THAP9-AS1	ARFGAP3	1.55e-06	yellow	yellow
THAP9-AS1	ARHGAP17	3.03e-05	yellow	yellow
THAP9-AS1	ARHGEF7	2.06e-05	yellow	yellow
THAP9-AS1	ARL5A	7.78e-05	yellow	yellow
THAP9-AS1	ARL5B	0.00014	yellow	yellow
THAP9-AS1	ARL6IP6	7.62e-05	yellow	yellow
THAP9-AS1	ARMC10	0.00024	yellow	yellow
THAP9-AS1	ARMC8	0.000461	yellow	yellow
THAP9-AS1	ASCC1	1.11e-05	yellow	yellow
THAP9-AS1	ASCC3	1.96e-05	yellow	yellow
THAP9-AS1	ASF1A	2.69e-05	yellow	yellow
THAP9-AS1	ASNSD1	0.000252	yellow	yellow
THAP9-AS1	ASXL1	0.000217	yellow	yellow
THAP9-AS1	ATAD2B	0.000185	yellow	yellow
THAP9-AS1	ATAD5	0.000118	yellow	yellow
THAP9-AS1	ATG3	0.000153	yellow	yellow
THAP9-AS1	ATG4C	0.000149	yellow	yellow
THAP9-AS1	ATIC	2.9e-05	yellow	yellow
THAP9-AS1	ATP11C	3.06e-05	yellow	yellow
THAP9-AS1	ATP13A3	9.57e-05	yellow	yellow
THAP9-AS1	ATP2A2	0.000213	yellow	yellow
THAP9-AS1	ATP2C1	0.000152	yellow	yellow
THAP9-AS1	ATP5F1A	1.34e-05	yellow	yellow
THAP9-AS1	ATP5F1B	2.69e-05	yellow	yellow
THAP9-AS1	ATP5PB	0.00012	yellow	yellow
THAP9-AS1	ATP6V0A2	0.000286	yellow	yellow
THAP9-AS1	ATR	0.000271	yellow	yellow
THAP9-AS1	ATXN7L1	3.5e-05	yellow	yellow
THAP9-AS1	B4GALT4	1.47e-05	yellow	yellow
THAP9-AS1	B4GALT5	8.03e-06	yellow	yellow
THAP9-AS1	B4GALT6	2.1e-06	yellow	yellow
THAP9-AS1	BARD1	0.000148	yellow	yellow
THAP9-AS1	BAZ1A	2.66e-05	yellow	yellow
THAP9-AS1	BAZ1B	0.000438	yellow	yellow
THAP9-AS1	BBS7	0.000283	yellow	yellow
THAP9-AS1	BCCIP	1.92e-06	yellow	yellow
THAP9-AS1	BCL10	5.26e-05	yellow	yellow
THAP9-AS1	BCL7A	4.19e-05	yellow	yellow
THAP9-AS1	BET1	0.000155	yellow	yellow
THAP9-AS1	BICD2	2.03e-05	yellow	yellow
THAP9-AS1	BIRC2	0.00011	yellow	yellow
THAP9-AS1	BLMH	5.09e-07	yellow	yellow
THAP9-AS1	BLOC1S2	3.27e-05	yellow	yellow
THAP9-AS1	BLOC1S5	9.25e-05	yellow	yellow
THAP9-AS1	BMS1	0.000106	yellow	yellow
THAP9-AS1	BMT2	9.98e-05	yellow	yellow
THAP9-AS1	BPGM	1.65e-05	yellow	yellow
THAP9-AS1	BRCA2	6.81e-05	yellow	yellow
THAP9-AS1	BRD4	1.67e-05	yellow	yellow
THAP9-AS1	BRIX1	0.000156	yellow	yellow
THAP9-AS1	BRMS1L	0.000112	yellow	yellow
THAP9-AS1	BRPF1	5.2e-05	yellow	yellow
THAP9-AS1	BTF3L4	0.000477	yellow	yellow
THAP9-AS1	BZW2	2.54e-06	yellow	yellow
THAP9-AS1	C12orf4	9.49e-05	yellow	yellow
THAP9-AS1	C12orf65	3.93e-05	yellow	yellow
THAP9-AS1	C18orf54	9.83e-07	yellow	yellow
THAP9-AS1	C2orf49	0.000494	yellow	yellow
THAP9-AS1	C2orf68	0.000171	yellow	yellow
THAP9-AS1	C2orf69	0.000257	yellow	yellow
THAP9-AS1	C4orf46	0.000655	yellow	yellow
THAP9-AS1	C5orf22	0.000153	yellow	yellow
THAP9-AS1	C6orf62	0.000215	yellow	yellow
THAP9-AS1	C9orf72	6.12e-05	yellow	yellow
THAP9-AS1	C9orf85	0.000235	yellow	yellow
THAP9-AS1	CADM1	1.3e-08	yellow	yellow
THAP9-AS1	CALM2	4.85e-05	yellow	yellow
THAP9-AS1	CALU	1.64e-05	yellow	yellow
THAP9-AS1	CAMK2G	3.98e-06	yellow	yellow
THAP9-AS1	CAMKMT	3.2e-05	yellow	yellow
THAP9-AS1	CAMSAP1	0.000103	yellow	yellow
THAP9-AS1	CAPZA1	0.000251	yellow	yellow
THAP9-AS1	CARMIL1	1.29e-05	yellow	yellow
THAP9-AS1	CASP2	0.000514	yellow	yellow
THAP9-AS1	CASP3	0.000183	yellow	yellow
THAP9-AS1	CBWD1	7.52e-06	yellow	yellow
THAP9-AS1	CBX3	7.82e-05	yellow	yellow
THAP9-AS1	CCDC112	9.17e-05	yellow	yellow
THAP9-AS1	CCDC174	8.14e-07	yellow	yellow
THAP9-AS1	CCDC59	0.000121	yellow	yellow
THAP9-AS1	CCDC6	2.19e-06	yellow	yellow
THAP9-AS1	CCDC90B	9.17e-06	yellow	yellow
THAP9-AS1	CCNC	3.46e-05	yellow	yellow
THAP9-AS1	CCNK	5.54e-05	yellow	yellow
THAP9-AS1	CCSER2	3.73e-05	yellow	yellow
THAP9-AS1	CCT4	0.000263	yellow	yellow
THAP9-AS1	CCT8	0.000131	yellow	yellow
THAP9-AS1	CCZ1	4.43e-06	yellow	yellow
THAP9-AS1	CCZ1B	1.1e-05	yellow	yellow
THAP9-AS1	CD47	1.69e-05	yellow	yellow
THAP9-AS1	CDC16	3.28e-05	yellow	yellow
THAP9-AS1	CDC40	8.01e-06	yellow	yellow
THAP9-AS1	CDCP1	1.57e-06	yellow	yellow
THAP9-AS1	CDK19	4.63e-07	yellow	yellow
THAP9-AS1	CDK2	0.000222	yellow	yellow
THAP9-AS1	CDYL	3.3e-05	yellow	yellow
THAP9-AS1	CEBPZ	0.000916	yellow	yellow
THAP9-AS1	CEBPZOS	9.35e-05	yellow	yellow
THAP9-AS1	CENPH	5.9e-05	yellow	yellow
THAP9-AS1	CENPK	6.82e-05	yellow	yellow
THAP9-AS1	CENPQ	0.000121	yellow	yellow
THAP9-AS1	CENPU	6.54e-05	yellow	yellow
THAP9-AS1	CEP128	2.61e-06	yellow	yellow
THAP9-AS1	CEP170	8.32e-05	yellow	yellow
THAP9-AS1	CEP192	0.000114	yellow	yellow
THAP9-AS1	CEP295	4.13e-05	yellow	yellow
THAP9-AS1	CEP57	8.01e-05	yellow	yellow
THAP9-AS1	CEP57L1	6.29e-06	yellow	yellow
THAP9-AS1	CEP70	3.6e-05	yellow	yellow
THAP9-AS1	CEP76	0.000204	yellow	yellow
THAP9-AS1	CEP78	0.000556	yellow	yellow
THAP9-AS1	CEP83.DT	1.33e-06	yellow	NA
THAP9-AS1	CEP85	2.32e-05	yellow	yellow
THAP9-AS1	CHAMP1	6.83e-05	yellow	yellow
THAP9-AS1	CHCHD3	0.00024	yellow	yellow
THAP9-AS1	CHCHD4	3.77e-05	yellow	yellow
THAP9-AS1	CHMP1B	3.54e-05	yellow	yellow
THAP9-AS1	CHMP3	0.000117	yellow	yellow
THAP9-AS1	CHORDC1	2.41e-05	yellow	yellow
THAP9-AS1	CIAO1	0.000368	yellow	yellow
THAP9-AS1	CIAO2A	3.12e-05	yellow	yellow
THAP9-AS1	CIR1	4.45e-05	yellow	yellow
THAP9-AS1	CISD1	8.64e-06	yellow	yellow
THAP9-AS1	CISD2	0.000228	yellow	yellow
THAP9-AS1	CKAP2	7.21e-05	yellow	yellow
THAP9-AS1	CKAP4	3.71e-07	yellow	yellow
THAP9-AS1	CKAP5	0.000284	yellow	yellow
THAP9-AS1	CLASP1	5.44e-05	yellow	yellow
THAP9-AS1	CLDND1	0.000373	yellow	yellow
THAP9-AS1	CLP1	2.2e-05	yellow	yellow
THAP9-AS1	CLPB	1.75e-06	yellow	yellow
THAP9-AS1	CMPK1	6.08e-05	yellow	yellow
THAP9-AS1	CNBP	0.000435	yellow	yellow
THAP9-AS1	CNNM3.DT	3.78e-06	yellow	NA
THAP9-AS1	CNOT10	0.000319	yellow	yellow
THAP9-AS1	CNOT11	0.0001	yellow	yellow
THAP9-AS1	CNOT7	2.5e-05	yellow	yellow
THAP9-AS1	CNOT9	0.001061	yellow	yellow
THAP9-AS1	CNTLN	1.33e-05	yellow	yellow
THAP9-AS1	COMMD8	7.91e-05	yellow	yellow
THAP9-AS1	COPB2	4.83e-05	yellow	yellow
THAP9-AS1	COPS7B	0.000652	yellow	yellow
THAP9-AS1	COQ2	0.000314	yellow	yellow
THAP9-AS1	CORO1C	3.45e-05	yellow	yellow
THAP9-AS1	COX7A2L	0.000167	yellow	yellow
THAP9-AS1	CPOX	3.33e-05	yellow	yellow
THAP9-AS1	CPSF3	0.000233	yellow	yellow
THAP9-AS1	CPSF6	0.000679	yellow	yellow
THAP9-AS1	CPSF7	0.000142	yellow	yellow
THAP9-AS1	CRCP	0.000124	yellow	yellow
THAP9-AS1	CREM	5.49e-06	yellow	yellow
THAP9-AS1	CRIPT	0.000203	yellow	yellow
THAP9-AS1	CRLF3	0.000111	yellow	yellow
THAP9-AS1	CS	0.000102	yellow	yellow
THAP9-AS1	CSDE1	7.33e-05	yellow	yellow
THAP9-AS1	CSNK2A3	8.12e-06	yellow	yellow
THAP9-AS1	CSTF2	1.67e-05	yellow	yellow
THAP9-AS1	CSTF3	0.000308	yellow	yellow
THAP9-AS1	CTNNAL1	1.92e-06	yellow	yellow
THAP9-AS1	CTNNB1	6.48e-06	yellow	yellow
THAP9-AS1	CUL1	0.000549	yellow	yellow
THAP9-AS1	CUL2	0.00056	yellow	yellow
THAP9-AS1	CUL4A	5.37e-05	yellow	yellow
THAP9-AS1	CWC22	0.000632	yellow	yellow
THAP9-AS1	CWC27	0.000236	yellow	yellow
THAP9-AS1	CWF19L1	0.000236	yellow	yellow
THAP9-AS1	CXorf56	0.000137	yellow	yellow
THAP9-AS1	CYB5R4	0.000102	yellow	yellow
THAP9-AS1	CYCS	1.29e-05	yellow	yellow
THAP9-AS1	CYREN	4.1e-05	yellow	yellow
THAP9-AS1	DAP	3.46e-07	yellow	yellow
THAP9-AS1	DARS1	0.000197	yellow	yellow
THAP9-AS1	DBR1	0.000403	yellow	yellow
THAP9-AS1	DCK	0.000203	yellow	yellow
THAP9-AS1	DCUN1D1	0.000169	yellow	yellow
THAP9-AS1	DCUN1D4	0.001259	yellow	yellow
THAP9-AS1	DDX1	0.00018	yellow	yellow
THAP9-AS1	DDX10	6.76e-05	yellow	yellow
THAP9-AS1	DDX18	0.000515	yellow	yellow
THAP9-AS1	DDX20	0.000553	yellow	yellow
THAP9-AS1	DDX21	0.000182	yellow	yellow
THAP9-AS1	DDX31	0.000541	yellow	yellow
THAP9-AS1	DDX50	0.000387	yellow	yellow
THAP9-AS1	DDX55	0.000238	yellow	yellow
THAP9-AS1	DENR	0.000413	yellow	yellow
THAP9-AS1	DFFA	0.000178	yellow	yellow
THAP9-AS1	DHFR	3.16e-05	yellow	yellow
THAP9-AS1	DHX33	9.31e-05	yellow	yellow
THAP9-AS1	DHX36	0.000345	yellow	yellow
THAP9-AS1	DHX57	0.000332	yellow	yellow
THAP9-AS1	DHX9	0.001154	yellow	yellow
THAP9-AS1	DIABLO	0.000194	yellow	yellow
THAP9-AS1	DIAPH1	4.74e-05	yellow	yellow
THAP9-AS1	DIS3	0.000178	yellow	yellow
THAP9-AS1	DLAT	8.25e-05	yellow	yellow
THAP9-AS1	DLD	0.000117	yellow	yellow
THAP9-AS1	DLG1	0.000178	yellow	yellow
THAP9-AS1	DNAAF2	3.13e-05	yellow	yellow
THAP9-AS1	DNAJB6	2.66e-05	yellow	yellow
THAP9-AS1	DNAJC11	0.000118	yellow	yellow
THAP9-AS1	DNAJC15	1.16e-07	yellow	yellow
THAP9-AS1	DNAJC9	2.8e-05	yellow	yellow
THAP9-AS1	DNM1L	0.000162	yellow	yellow
THAP9-AS1	DNTTIP2	0.000137	yellow	yellow
THAP9-AS1	DOCK7	4.09e-05	yellow	yellow
THAP9-AS1	DOLPP1	1.33e-05	yellow	yellow
THAP9-AS1	DPAGT1	4.24e-06	yellow	yellow
THAP9-AS1	DPF2	5.59e-05	yellow	yellow
THAP9-AS1	DPH3	0.000128	yellow	yellow
THAP9-AS1	DPH5	2.14e-05	yellow	yellow
THAP9-AS1	DR1	0.000247	yellow	yellow
THAP9-AS1	DROSHA	0.000131	yellow	yellow
THAP9-AS1	DSG2	8.74e-06	yellow	yellow
THAP9-AS1	DSP	3.02e-07	yellow	yellow
THAP9-AS1	DUS4L	0.000156	yellow	yellow
THAP9-AS1	DUSP11	0.000602	yellow	yellow
THAP9-AS1	DVL3	6.62e-05	yellow	yellow
THAP9-AS1	DYM	6.07e-05	yellow	yellow
THAP9-AS1	E2F6	0.000215	yellow	yellow
THAP9-AS1	ECT2	0.000144	yellow	yellow
THAP9-AS1	EDC3	5.59e-05	yellow	yellow
THAP9-AS1	EED	7.64e-05	yellow	yellow
THAP9-AS1	EEF1AKMT2	6.14e-06	yellow	yellow
THAP9-AS1	EEF1E1	5.34e-05	yellow	yellow
THAP9-AS1	EFTUD2	4.44e-05	yellow	yellow
THAP9-AS1	EHBP1	8.52e-05	yellow	yellow
THAP9-AS1	EHF	2.58e-07	yellow	yellow
THAP9-AS1	EI24	1.08e-05	yellow	yellow
THAP9-AS1	EIF1AD	9.67e-05	yellow	yellow
THAP9-AS1	EIF2A	0.000128	yellow	yellow
THAP9-AS1	EIF2B1	0.000447	yellow	yellow
THAP9-AS1	EIF2S1	0.00016	yellow	yellow
THAP9-AS1	EIF2S2	4.31e-05	yellow	yellow
THAP9-AS1	EIF2S3	1.42e-05	yellow	yellow
THAP9-AS1	EIF3EP1	8.96e-06	yellow	yellow
THAP9-AS1	EIF3J	0.000155	yellow	yellow
THAP9-AS1	EIF4A3	1.79e-05	yellow	yellow
THAP9-AS1	EIF4E2	5.63e-05	yellow	yellow
THAP9-AS1	EIF4EBP2	1.12e-05	yellow	yellow
THAP9-AS1	EIF4G1	3.33e-05	yellow	yellow
THAP9-AS1	EIF4H	6.58e-05	yellow	yellow
THAP9-AS1	EIF5B	0.000111	yellow	yellow
THAP9-AS1	ELAVL1	0.001176	yellow	yellow
THAP9-AS1	ELK1	2.33e-05	yellow	yellow
THAP9-AS1	ELOA	0.000223	yellow	yellow
THAP9-AS1	ELOVL6	3.45e-06	yellow	yellow
THAP9-AS1	ELOVL7	8.05e-08	yellow	yellow
THAP9-AS1	ELP4	5.66e-05	yellow	yellow
THAP9-AS1	EMC1	8.87e-05	yellow	yellow
THAP9-AS1	EML4	0.000103	yellow	yellow
THAP9-AS1	ENOX2	6.66e-05	yellow	yellow
THAP9-AS1	EPB41L4B	1.41e-06	yellow	yellow
THAP9-AS1	EPM2A	1.4e-05	yellow	yellow
THAP9-AS1	ERC1	1.67e-05	yellow	yellow
THAP9-AS1	ERCC3	0.000201	yellow	yellow
THAP9-AS1	ERGIC2	2.46e-05	yellow	yellow
THAP9-AS1	ERI1	1.3e-06	yellow	yellow
THAP9-AS1	ERP44	8.24e-05	yellow	yellow
THAP9-AS1	ESCO1	0.000604	yellow	yellow
THAP9-AS1	ESCO2	1.1e-05	yellow	yellow
THAP9-AS1	ESYT2	1.67e-05	yellow	yellow
THAP9-AS1	EXOSC10	0.000312	yellow	yellow
THAP9-AS1	EXOSC2	0.000647	yellow	yellow
THAP9-AS1	EXOSC9	0.000997	yellow	yellow
THAP9-AS1	EXPH5	1.05e-06	yellow	yellow
THAP9-AS1	EXT2	5.83e-06	yellow	yellow
THAP9-AS1	EXTL2	4.48e-05	yellow	yellow
THAP9-AS1	EXTL3	4.01e-07	yellow	yellow
THAP9-AS1	FAM117B	9.16e-05	yellow	yellow
THAP9-AS1	FAM118B	1.2e-05	yellow	yellow
THAP9-AS1	FAM133B	0.001458	yellow	yellow
THAP9-AS1	FAM160A1	2.2e-06	yellow	yellow
THAP9-AS1	FAM161A	3.35e-05	yellow	yellow
THAP9-AS1	FAM168B	5.66e-05	yellow	yellow
THAP9-AS1	FAM200B	0.000247	yellow	yellow
THAP9-AS1	FAM210A	0.000129	yellow	yellow
THAP9-AS1	FAM220A	3.76e-05	yellow	yellow
THAP9-AS1	FAM222B	3.68e-07	yellow	yellow
THAP9-AS1	FAM3C	9.64e-06	yellow	yellow
THAP9-AS1	FAM53C	0.000115	yellow	yellow
THAP9-AS1	FAM76A	0.000444	yellow	yellow
THAP9-AS1	FAM76B	9.15e-05	yellow	yellow
THAP9-AS1	FAM83B	3.12e-08	yellow	yellow
THAP9-AS1	FAM98A	8.62e-05	yellow	yellow
THAP9-AS1	FANCD2	3.48e-05	yellow	yellow
THAP9-AS1	FANCI	5.11e-05	yellow	yellow
THAP9-AS1	FANCL	3.32e-05	yellow	yellow
THAP9-AS1	FARSB	0.000328	yellow	yellow
THAP9-AS1	FASTKD1	0.000163	yellow	yellow
THAP9-AS1	FASTKD2	0.000443	yellow	yellow
THAP9-AS1	FAXC	2.68e-06	yellow	yellow
THAP9-AS1	FBH1	6.33e-05	yellow	yellow
THAP9-AS1	FBXO22	6.97e-05	yellow	yellow
THAP9-AS1	FBXO30	1.62e-05	yellow	yellow
THAP9-AS1	FBXO45	0.00019	yellow	yellow
THAP9-AS1	FBXO48	8.25e-05	yellow	yellow
THAP9-AS1	FBXW7	5.24e-05	yellow	yellow
THAP9-AS1	FCF1	0.000102	yellow	yellow
THAP9-AS1	FDX1	3.21e-06	yellow	yellow
THAP9-AS1	FGD4	5.36e-06	yellow	yellow
THAP9-AS1	FGFR1OP2	6.59e-05	yellow	yellow
THAP9-AS1	FIGNL1	0.000226	yellow	yellow
THAP9-AS1	FIP1L1	0.001011	yellow	yellow
THAP9-AS1	FMR1	0.000219	yellow	yellow
THAP9-AS1	FOXN2	5.91e-05	yellow	yellow
THAP9-AS1	FOXO3B	2.51e-06	yellow	yellow
THAP9-AS1	FUBP1	0.000759	yellow	yellow
THAP9-AS1	FXR1	7.11e-05	yellow	yellow
THAP9-AS1	FYTTD1	0.000163	yellow	yellow
THAP9-AS1	FZD5	5.88e-08	yellow	yellow
THAP9-AS1	GALNT3	1.02e-07	yellow	yellow
THAP9-AS1	GANAB	2.56e-05	yellow	yellow
THAP9-AS1	GART	0.000273	yellow	yellow
THAP9-AS1	GCA	1.93e-05	yellow	yellow
THAP9-AS1	GCFC2	0.000378	yellow	yellow
THAP9-AS1	GCH1	1.45e-06	yellow	yellow
THAP9-AS1	GCLM	1.03e-05	yellow	yellow
THAP9-AS1	GDI2	0.000105	yellow	yellow
THAP9-AS1	GEMIN2	4.99e-05	yellow	yellow
THAP9-AS1	GEN1	0.000307	yellow	yellow
THAP9-AS1	GGCX	6.29e-06	yellow	yellow
THAP9-AS1	GLB1	5.72e-06	yellow	yellow
THAP9-AS1	GLMN	3.89e-05	yellow	yellow
THAP9-AS1	GLO1	4.16e-05	yellow	yellow
THAP9-AS1	GLRX3	6.29e-05	yellow	yellow
THAP9-AS1	GMEB1	0.000702	yellow	yellow
THAP9-AS1	GMPS	0.00024	yellow	yellow
THAP9-AS1	GNA12	2.13e-06	yellow	yellow
THAP9-AS1	GNAI3	0.000303	yellow	yellow
THAP9-AS1	GNB4	8.77e-06	yellow	yellow
THAP9-AS1	GNL3	0.000153	yellow	yellow
THAP9-AS1	GNL3L	3.47e-05	yellow	yellow
THAP9-AS1	GOLPH3	6.43e-05	yellow	yellow
THAP9-AS1	GOLT1B	1.1e-05	yellow	yellow
THAP9-AS1	GOPC	8.22e-05	yellow	yellow
THAP9-AS1	GORASP2	6.53e-05	yellow	yellow
THAP9-AS1	GOT1	5.49e-06	yellow	yellow
THAP9-AS1	GPATCH1	6.12e-05	yellow	yellow
THAP9-AS1	GPATCH11	0.000262	yellow	yellow
THAP9-AS1	GPBP1L1	0.00038	yellow	yellow
THAP9-AS1	GPR157	1.18e-07	yellow	yellow
THAP9-AS1	GPR180	3.67e-05	yellow	yellow
THAP9-AS1	GPR75	2.45e-06	yellow	yellow
THAP9-AS1	GRB10	2.15e-07	yellow	yellow
THAP9-AS1	GRPEL2	0.000445	yellow	yellow
THAP9-AS1	GRSF1	0.000356	yellow	yellow
THAP9-AS1	GTF2A2	2.89e-05	yellow	yellow
THAP9-AS1	GTF2B	0.000159	yellow	yellow
THAP9-AS1	GTF2E1	3.73e-05	yellow	yellow
THAP9-AS1	GTF2E2	2.39e-06	yellow	yellow
THAP9-AS1	GTF2F2	5.44e-06	yellow	yellow
THAP9-AS1	GTF2H1	0.000306	yellow	yellow
THAP9-AS1	GTF3C2	0.000556	yellow	yellow
THAP9-AS1	GTF3C3	0.000271	yellow	yellow
THAP9-AS1	GTPBP8	0.000195	yellow	yellow
THAP9-AS1	GYG1	3.52e-05	yellow	yellow
THAP9-AS1	H2AZ1	0.000374	yellow	yellow
THAP9-AS1	H2AZ2	0.000105	yellow	yellow
THAP9-AS1	HACD2	5.69e-06	yellow	yellow
THAP9-AS1	HACE1	1.51e-05	yellow	yellow
THAP9-AS1	HADH	2.49e-06	yellow	yellow
THAP9-AS1	HADHA	5.27e-05	yellow	yellow
THAP9-AS1	HARBI1	4.08e-05	yellow	yellow
THAP9-AS1	HAUS1	4.71e-06	yellow	yellow
THAP9-AS1	HAUS6	0.00046	yellow	yellow
THAP9-AS1	HAUS6P1	8.89e-07	yellow	yellow
THAP9-AS1	HBS1L	9.36e-06	yellow	yellow
THAP9-AS1	HCG18	4.02e-05	yellow	yellow
THAP9-AS1	HDLBP	6.68e-06	yellow	yellow
THAP9-AS1	HECA	1.79e-05	yellow	yellow
THAP9-AS1	HELLS	4.78e-05	yellow	yellow
THAP9-AS1	HIF1A	4.73e-07	yellow	yellow
THAP9-AS1	HLTF	6.27e-05	yellow	yellow
THAP9-AS1	HMGB1	0.000167	yellow	yellow
THAP9-AS1	HMGB1P5	4.61e-06	yellow	yellow
THAP9-AS1	HMGCS1	1.87e-06	yellow	yellow
THAP9-AS1	HMGN1	5.69e-05	yellow	yellow
THAP9-AS1	HMGN2	3.3e-05	yellow	yellow
THAP9-AS1	HMGN4	0.000124	yellow	yellow
THAP9-AS1	HNRNPA2B1	0.001055	yellow	yellow
THAP9-AS1	HNRNPA3	0.000896	yellow	yellow
THAP9-AS1	HNRNPA3P12	2.44e-05	yellow	yellow
THAP9-AS1	HNRNPA3P3	5.77e-06	yellow	yellow
THAP9-AS1	HNRNPA3P5	5.72e-06	yellow	yellow
THAP9-AS1	HNRNPAB	3.88e-05	yellow	yellow
THAP9-AS1	HNRNPC	0.000682	yellow	yellow
THAP9-AS1	HNRNPD	0.004823	yellow	yellow
THAP9-AS1	HNRNPF	0.000116	yellow	yellow
THAP9-AS1	HNRNPH3	0.000744	yellow	yellow
THAP9-AS1	HNRNPKP1	3.46e-05	yellow	yellow
THAP9-AS1	HNRNPKP2	1.46e-05	yellow	yellow
THAP9-AS1	HNRNPL	0.001783	yellow	yellow
THAP9-AS1	HNRNPLL	0.000421	yellow	yellow
THAP9-AS1	HNRNPR	0.001033	yellow	yellow
THAP9-AS1	HNRNPUL1	9.19e-05	yellow	yellow
THAP9-AS1	HOMER1	4.87e-07	yellow	yellow
THAP9-AS1	HPF1	0.000167	yellow	yellow
THAP9-AS1	HPRT1	4.2e-05	yellow	yellow
THAP9-AS1	HPS5	7.81e-05	yellow	yellow
THAP9-AS1	HS2ST1	0.00012	yellow	yellow
THAP9-AS1	HSD17B12	1.04e-05	yellow	yellow
THAP9-AS1	HSF2BP	1e-06	yellow	yellow
THAP9-AS1	HSP90AA1	5.46e-06	yellow	yellow
THAP9-AS1	HSP90B1	1.88e-05	yellow	yellow
THAP9-AS1	HSPA13	3.46e-06	yellow	yellow
THAP9-AS1	HSPA5	1.81e-06	yellow	yellow
THAP9-AS1	HSPA8	2.88e-05	yellow	yellow
THAP9-AS1	HSPD1	6.6e-06	yellow	yellow
THAP9-AS1	HSPD1P5	1.17e-06	yellow	yellow
THAP9-AS1	HSPE1.MOB4	5.75e-07	yellow	NA
THAP9-AS1	HSPH1	3.47e-06	yellow	yellow
THAP9-AS1	HTATSF1	5.24e-05	yellow	yellow
THAP9-AS1	HUS1	7.75e-05	yellow	yellow
THAP9-AS1	HUWE1	0.000165	yellow	yellow
THAP9-AS1	HYLS1	3.31e-05	yellow	yellow
THAP9-AS1	HYOU1	8.8e-07	yellow	yellow
THAP9-AS1	IARS1	0.000334	yellow	yellow
THAP9-AS1	ICE1	0.000234	yellow	yellow
THAP9-AS1	ICMT	6.29e-05	yellow	yellow
THAP9-AS1	ID2	5.31e-06	yellow	yellow
THAP9-AS1	IFT57	2.13e-05	yellow	yellow
THAP9-AS1	IGF2R	9.49e-06	yellow	yellow
THAP9-AS1	ILF3	0.000251	yellow	yellow
THAP9-AS1	ILRUN	5.81e-05	yellow	yellow
THAP9-AS1	IMMP1L	6.88e-05	yellow	yellow
THAP9-AS1	IMMT	0.000218	yellow	yellow
THAP9-AS1	ING3	0.00021	yellow	yellow
THAP9-AS1	INTS10	2.79e-06	yellow	yellow
THAP9-AS1	IPMK	6.47e-06	yellow	yellow
THAP9-AS1	IPO5	3.44e-05	yellow	yellow
THAP9-AS1	IPO8	0.000143	yellow	yellow
THAP9-AS1	IRGQ	1.13e-05	yellow	yellow
THAP9-AS1	ITGB3BP	0.000195	yellow	yellow
THAP9-AS1	ITPR3	6.09e-06	yellow	yellow
THAP9-AS1	IVNS1ABP	2.21e-05	yellow	yellow
THAP9-AS1	IWS1	0.000182	yellow	yellow
THAP9-AS1	JARID2	6.93e-06	yellow	yellow
THAP9-AS1	KANSL1L	2.14e-05	yellow	yellow
THAP9-AS1	KANSL2	0.001186	yellow	yellow
THAP9-AS1	KATNBL1	0.000103	yellow	yellow
THAP9-AS1	KCTD20	0.000164	yellow	yellow
THAP9-AS1	KCTD5	6.73e-06	yellow	yellow
THAP9-AS1	KCTD9	1.02e-05	yellow	yellow
THAP9-AS1	KDELR2	2.5e-06	yellow	yellow
THAP9-AS1	KDELR3	1.65e-08	yellow	yellow
THAP9-AS1	KDM1A	0.000228	yellow	yellow
THAP9-AS1	KDM1B	1e-05	yellow	yellow
THAP9-AS1	KDM3A	0.000101	yellow	yellow
THAP9-AS1	KDM5A	6.66e-05	yellow	yellow
THAP9-AS1	KHDRBS1	0.002117	yellow	yellow
THAP9-AS1	KIAA1549	2.68e-06	yellow	yellow
THAP9-AS1	KIAA1586	0.000121	yellow	yellow
THAP9-AS1	KIAA1841	9.19e-05	yellow	yellow
THAP9-AS1	KIF1B	5.8e-05	yellow	yellow
THAP9-AS1	KIF20B	0.000246	yellow	yellow
THAP9-AS1	KIF21A	9.43e-06	yellow	yellow
THAP9-AS1	KIF5B	0.000233	yellow	yellow
THAP9-AS1	KLHL15	3.26e-05	yellow	yellow
THAP9-AS1	KLHL23	5.05e-05	yellow	yellow
THAP9-AS1	KLHL24	3.66e-05	yellow	yellow
THAP9-AS1	KMT5A	5.61e-05	yellow	yellow
THAP9-AS1	KNL1	6.69e-05	yellow	yellow
THAP9-AS1	KNTC1	0.000262	yellow	yellow
THAP9-AS1	KPNA3	0.000112	yellow	yellow
THAP9-AS1	KPNA4	0.000497	yellow	yellow
THAP9-AS1	KPNB1	0.000346	yellow	yellow
THAP9-AS1	KRAS	1.17e-05	yellow	yellow
THAP9-AS1	KRBOX4	0.000124	yellow	yellow
THAP9-AS1	LAMP2	1.16e-05	yellow	yellow
THAP9-AS1	LAPTM4A	2.07e-05	yellow	yellow
THAP9-AS1	LARP4B	0.000293	yellow	yellow
THAP9-AS1	LCLAT1	9.81e-05	yellow	yellow
THAP9-AS1	LDHA	3.28e-06	yellow	yellow
THAP9-AS1	LINC00294	1.22e-05	yellow	yellow
THAP9-AS1	LINC00471	4.27e-07	yellow	yellow
THAP9-AS1	LITAF	3.52e-07	yellow	yellow
THAP9-AS1	LMO7	1.54e-07	yellow	yellow
THAP9-AS1	LOC102724159	2.78e-06	yellow	yellow
THAP9-AS1	LOC105274304	2.56e-07	yellow	yellow
THAP9-AS1	LOC105372321	9.19e-07	yellow	yellow
THAP9-AS1	LOC149844	6.43e-07	yellow	yellow
THAP9-AS1	LOC220729	0.000185	yellow	yellow
THAP9-AS1	LOC284685	2.25e-05	yellow	yellow
THAP9-AS1	LOC339803	2.83e-08	yellow	yellow
THAP9-AS1	LOC442155	1.1e-05	yellow	yellow
THAP9-AS1	LOC644584	1.44e-05	yellow	yellow
THAP9-AS1	LOC732229	2.78e-05	yellow	yellow
THAP9-AS1	LONRF1	3.6e-06	yellow	yellow
THAP9-AS1	LPCAT1	3.75e-08	yellow	yellow
THAP9-AS1	LRCH3	0.000148	yellow	yellow
THAP9-AS1	LRP6	2.41e-06	yellow	yellow
THAP9-AS1	LRPPRC	0.000412	yellow	yellow
THAP9-AS1	LRR1	7.82e-05	yellow	yellow
THAP9-AS1	LRRC28	7.98e-08	yellow	yellow
THAP9-AS1	LRRC40	0.000397	yellow	yellow
THAP9-AS1	LRRC58	0.000251	yellow	yellow
THAP9-AS1	LRRC8B	4.88e-05	yellow	yellow
THAP9-AS1	LSG1	0.000138	yellow	yellow
THAP9-AS1	LSM12	0.000145	yellow	yellow
THAP9-AS1	LSM14A	0.000207	yellow	yellow
THAP9-AS1	LSM3	2.91e-05	yellow	yellow
THAP9-AS1	LSM8	6.78e-07	yellow	yellow
THAP9-AS1	LUC7L2	0.003855	yellow	yellow
THAP9-AS1	M6PR	5.34e-05	yellow	yellow
THAP9-AS1	MAGED1	2.7e-08	yellow	yellow
THAP9-AS1	MAGT1	4.13e-05	yellow	yellow
THAP9-AS1	MAIP1	0.000154	yellow	yellow
THAP9-AS1	MAK16	7.55e-06	yellow	yellow
THAP9-AS1	MAP2K1	2.17e-05	yellow	yellow
THAP9-AS1	MAP3K13	6.21e-06	yellow	yellow
THAP9-AS1	MAPK14	0.000237	yellow	yellow
THAP9-AS1	MAPK6	1.32e-05	yellow	yellow
THAP9-AS1	MAPKAP1	5.82e-05	yellow	yellow
THAP9-AS1	MAPKAPK5	0.00078	yellow	yellow
THAP9-AS1	MAPRE1	0.00014	yellow	yellow
THAP9-AS1	MARK1	1.81e-07	yellow	yellow
THAP9-AS1	MARK3	4.54e-05	yellow	yellow
THAP9-AS1	MARS1	2.91e-05	yellow	yellow
THAP9-AS1	MARS2	4.97e-05	yellow	yellow
THAP9-AS1	MBD2	1.79e-05	yellow	yellow
THAP9-AS1	MBD4	0.000174	yellow	yellow
THAP9-AS1	MBIP	1.31e-05	yellow	yellow
THAP9-AS1	MCFD2	9.61e-05	yellow	yellow
THAP9-AS1	MCM8	6.29e-05	yellow	yellow
THAP9-AS1	MCMBP	0.000264	yellow	yellow
THAP9-AS1	MCTS2P	1.34e-05	yellow	yellow
THAP9-AS1	MCU	1.1e-05	yellow	yellow
THAP9-AS1	MCUB	8.3e-05	yellow	yellow
THAP9-AS1	MCUR1	8.45e-05	yellow	yellow
THAP9-AS1	MDH1	0.000254	yellow	yellow
THAP9-AS1	MED14	0.000137	yellow	yellow
THAP9-AS1	MED17	5.32e-05	yellow	yellow
THAP9-AS1	MED21	2.48e-05	yellow	yellow
THAP9-AS1	MED4	6.04e-05	yellow	yellow
THAP9-AS1	MED6	0.000134	yellow	yellow
THAP9-AS1	MESD	1.52e-05	yellow	yellow
THAP9-AS1	METAP1	0.001166	yellow	yellow
THAP9-AS1	METAP2	0.000277	yellow	yellow
THAP9-AS1	METTL21A	6.58e-05	yellow	yellow
THAP9-AS1	METTL2B	0.000412	yellow	yellow
THAP9-AS1	METTL4	0.000265	yellow	yellow
THAP9-AS1	METTL6	5.05e-05	yellow	yellow
THAP9-AS1	METTL8	0.000162	yellow	yellow
THAP9-AS1	METTL9	7.33e-05	yellow	yellow
THAP9-AS1	MEX3C	0.000223	yellow	yellow
THAP9-AS1	MFF	0.000136	yellow	yellow
THAP9-AS1	MFF.DT	2.97e-05	yellow	NA
THAP9-AS1	MFN1	4.26e-05	yellow	yellow
THAP9-AS1	MFSD1	2.52e-05	yellow	yellow
THAP9-AS1	MFSD14B	0.000344	yellow	yellow
THAP9-AS1	MFSD14C	1.67e-05	yellow	yellow
THAP9-AS1	MFSD9	3.09e-05	yellow	yellow
THAP9-AS1	MIS18A	6.34e-05	yellow	yellow
THAP9-AS1	MIS18BP1	0.000166	yellow	yellow
THAP9-AS1	MITD1	0.000509	yellow	yellow
THAP9-AS1	MKRN1	0.000267	yellow	yellow
THAP9-AS1	MKRN2	0.000252	yellow	yellow
THAP9-AS1	MLLT10	0.000749	yellow	yellow
THAP9-AS1	MLX	2.67e-05	yellow	yellow
THAP9-AS1	MMADHC	0.000209	yellow	yellow
THAP9-AS1	MMGT1	9.37e-05	yellow	yellow
THAP9-AS1	MOB1A	0.000616	yellow	yellow
THAP9-AS1	MORC4	2.24e-06	yellow	yellow
THAP9-AS1	MORF4L1	6.55e-05	yellow	yellow
THAP9-AS1	MOSPD1	5.58e-05	yellow	yellow
THAP9-AS1	MPHOSPH10	0.001154	yellow	yellow
THAP9-AS1	MPZL3	2.97e-06	yellow	yellow
THAP9-AS1	MRE11	8.33e-05	yellow	yellow
THAP9-AS1	MRPL19	0.000408	yellow	yellow
THAP9-AS1	MRPL3	0.000225	yellow	yellow
THAP9-AS1	MRPL30	0.00019	yellow	yellow
THAP9-AS1	MRPL35	0.0002	yellow	yellow
THAP9-AS1	MRPL39	4.37e-05	yellow	yellow
THAP9-AS1	MRPL42	0.000122	yellow	yellow
THAP9-AS1	MRPL44	0.00017	yellow	yellow
THAP9-AS1	MRPL50	0.000384	yellow	yellow
THAP9-AS1	MRPS16	3.05e-06	yellow	yellow
THAP9-AS1	MRPS18C	0.002083	yellow	yellow
THAP9-AS1	MRPS22	0.000191	yellow	yellow
THAP9-AS1	MRPS31	4.31e-05	yellow	yellow
THAP9-AS1	MRS2	0.0002	yellow	yellow
THAP9-AS1	MSANTD4	2.17e-05	yellow	yellow
THAP9-AS1	MSH6	0.00033	yellow	yellow
THAP9-AS1	MTAP	4.37e-05	yellow	yellow
THAP9-AS1	MTCH2	0.000135	yellow	yellow
THAP9-AS1	MTERF1	0.000461	yellow	yellow
THAP9-AS1	MTF2	5.5e-05	yellow	yellow
THAP9-AS1	MTFMT	1.24e-05	yellow	yellow
THAP9-AS1	MTHFD1	6.38e-05	yellow	yellow
THAP9-AS1	MTIF2	0.000474	yellow	yellow
THAP9-AS1	MTIF2P1	1.73e-07	yellow	yellow
THAP9-AS1	MTMR1	0.000187	yellow	yellow
THAP9-AS1	MTMR12	5.26e-05	yellow	yellow
THAP9-AS1	MTO1	0.000163	yellow	yellow
THAP9-AS1	MTPAP	0.000912	yellow	yellow
THAP9-AS1	MTPN	0.000316	yellow	yellow
THAP9-AS1	MTRF1L	2.95e-05	yellow	yellow
THAP9-AS1	MTX2	0.000148	yellow	yellow
THAP9-AS1	MYD88	2.01e-05	yellow	yellow
THAP9-AS1	MYO19	1.85e-05	yellow	yellow
THAP9-AS1	MZT1	4.03e-05	yellow	yellow
THAP9-AS1	NAA15	0.000722	yellow	yellow
THAP9-AS1	NAA25	0.000537	yellow	yellow
THAP9-AS1	NAA40	3.57e-05	yellow	yellow
THAP9-AS1	NAA50	0.000202	yellow	yellow
THAP9-AS1	NAB1	4.22e-05	yellow	yellow
THAP9-AS1	NAMPTP1	1.54e-07	yellow	yellow
THAP9-AS1	NANP	0.000164	yellow	yellow
THAP9-AS1	NAP1L1	4.26e-05	yellow	yellow
THAP9-AS1	NARS1	7.46e-05	yellow	yellow
THAP9-AS1	NAT10	1.69e-05	yellow	yellow
THAP9-AS1	NBPF8	1.61e-06	yellow	yellow
THAP9-AS1	NCAPD3	1.36e-05	yellow	yellow
THAP9-AS1	NCBP1	0.000451	yellow	yellow
THAP9-AS1	NCBP2	0.000211	yellow	yellow
THAP9-AS1	NCK1	6.9e-05	yellow	yellow
THAP9-AS1	NCKAP1	0.000256	yellow	yellow
THAP9-AS1	NCL	0.000407	yellow	yellow
THAP9-AS1	NDC1	5.88e-05	yellow	yellow
THAP9-AS1	NDUFAF7	0.001004	yellow	yellow
THAP9-AS1	NDUFB3	4.51e-05	yellow	yellow
THAP9-AS1	NDUFB5	1.13e-05	yellow	yellow
THAP9-AS1	NEMP1	0.000173	yellow	yellow
THAP9-AS1	NEMP2	3.36e-05	yellow	yellow
THAP9-AS1	NEPRO	0.000665	yellow	yellow
THAP9-AS1	NET1	2.25e-06	yellow	yellow
THAP9-AS1	NFXL1	0.000192	yellow	yellow
THAP9-AS1	NFYB	0.000349	yellow	yellow
THAP9-AS1	NHEJ1	5.86e-06	yellow	yellow
THAP9-AS1	NIF3L1	0.000495	yellow	yellow
THAP9-AS1	NIFK	9.98e-05	yellow	yellow
THAP9-AS1	NIPA2	0.000103	yellow	yellow
THAP9-AS1	NIPSNAP3A	0.000119	yellow	yellow
THAP9-AS1	NKAPD1	0.000164	yellow	yellow
THAP9-AS1	NKRF	0.00041	yellow	yellow
THAP9-AS1	NLN	6.2e-05	yellow	yellow
THAP9-AS1	NMD3	8.74e-05	yellow	yellow
THAP9-AS1	NOA1	0.000244	yellow	yellow
THAP9-AS1	NOC3L	0.000448	yellow	yellow
THAP9-AS1	NOL10	0.000151	yellow	yellow
THAP9-AS1	NOL9	0.000116	yellow	yellow
THAP9-AS1	NOLC1	0.000173	yellow	yellow
THAP9-AS1	NOM1	0.000378	yellow	yellow
THAP9-AS1	NOMO2	4.87e-06	yellow	yellow
THAP9-AS1	NONO	0.000382	yellow	yellow
THAP9-AS1	NOP14	6.76e-05	yellow	yellow
THAP9-AS1	NOP58	0.000817	yellow	yellow
THAP9-AS1	NPAT	0.000112	yellow	yellow
THAP9-AS1	NPC1	2.75e-05	yellow	yellow
THAP9-AS1	NPLOC4	1.13e-05	yellow	yellow
THAP9-AS1	NPM1	7.92e-05	yellow	yellow
THAP9-AS1	NRBF2	1.96e-05	yellow	yellow
THAP9-AS1	NRBP1	1.74e-05	yellow	yellow
THAP9-AS1	NRDC	0.000174	yellow	yellow
THAP9-AS1	NSD2	0.000157	yellow	yellow
THAP9-AS1	NSUN2	3.46e-05	yellow	yellow
THAP9-AS1	NSUN4	0.000218	yellow	yellow
THAP9-AS1	NSUN6	0.000217	yellow	yellow
THAP9-AS1	NT5C2	3.62e-05	yellow	yellow
THAP9-AS1	NTAN1	1.1e-06	yellow	yellow
THAP9-AS1	NUB1	6.97e-05	yellow	yellow
THAP9-AS1	NUDT15	7.33e-06	yellow	yellow
THAP9-AS1	NUDT3	6.29e-05	yellow	yellow
THAP9-AS1	NUFIP1	0.000114	yellow	yellow
THAP9-AS1	NUP153	6.96e-05	yellow	yellow
THAP9-AS1	NUP155	0.00023	yellow	yellow
THAP9-AS1	NUP160	0.000249	yellow	yellow
THAP9-AS1	NUP188	0.00036	yellow	yellow
THAP9-AS1	NUP205	0.00039	yellow	yellow
THAP9-AS1	NUP210	9.24e-06	yellow	yellow
THAP9-AS1	NUP35	0.000374	yellow	yellow
THAP9-AS1	NUP37	0.000186	yellow	yellow
THAP9-AS1	NUP43	4.7e-05	yellow	yellow
THAP9-AS1	NUP50	0.000196	yellow	yellow
THAP9-AS1	NUP54	0.002458	yellow	yellow
THAP9-AS1	NUP62	4.54e-05	yellow	yellow
THAP9-AS1	NUS1	7.04e-05	yellow	yellow
THAP9-AS1	NXT2	6.53e-06	yellow	yellow
THAP9-AS1	OAT	1.94e-06	yellow	yellow
THAP9-AS1	OBI1	0.000212	yellow	yellow
THAP9-AS1	ODF2	2.47e-05	yellow	yellow
THAP9-AS1	ODF2L	1.9e-05	yellow	yellow
THAP9-AS1	OLA1	5.69e-05	yellow	yellow
THAP9-AS1	OPA1	0.000198	yellow	yellow
THAP9-AS1	OPN3	3.58e-07	yellow	yellow
THAP9-AS1	OR7E14P	5.08e-07	yellow	yellow
THAP9-AS1	ORC3	0.000146	yellow	yellow
THAP9-AS1	ORC5	0.000342	yellow	yellow
THAP9-AS1	ORMDL1	0.000429	yellow	yellow
THAP9-AS1	OSBPL11	0.000397	yellow	yellow
THAP9-AS1	OSBPL9	1.18e-05	yellow	yellow
THAP9-AS1	OSTC	0.000103	yellow	yellow
THAP9-AS1	OSTCP3	1.99e-07	yellow	yellow
THAP9-AS1	OTUD4	0.000448	yellow	yellow
THAP9-AS1	OTULIN	4.47e-05	yellow	yellow
THAP9-AS1	OXNAD1	0.000131	yellow	yellow
THAP9-AS1	OXSR1	0.000318	yellow	yellow
THAP9-AS1	PAFAH1B2	0.000108	yellow	yellow
THAP9-AS1	PAICS	0.000333	yellow	yellow
THAP9-AS1	PAIP1	0.000231	yellow	yellow
THAP9-AS1	PAK2	9.06e-05	yellow	yellow
THAP9-AS1	PANK1	5.25e-06	yellow	yellow
THAP9-AS1	PANX1	1.87e-05	yellow	yellow
THAP9-AS1	PAPOLG	0.000706	yellow	yellow
THAP9-AS1	PAQR3	0.000322	yellow	yellow
THAP9-AS1	PARD3	1.13e-05	yellow	yellow
THAP9-AS1	PARP2	8.4e-05	yellow	yellow
THAP9-AS1	PARPBP	0.000141	yellow	yellow
THAP9-AS1	PATL1	0.000287	yellow	yellow
THAP9-AS1	PAXBP1	0.000746	yellow	yellow
THAP9-AS1	PCGF6	0.00025	yellow	yellow
THAP9-AS1	PCID2	2.11e-05	yellow	yellow
THAP9-AS1	PCLAF	7.87e-06	yellow	yellow
THAP9-AS1	PCMT1	3.37e-05	yellow	yellow
THAP9-AS1	PCNA	7.98e-05	yellow	yellow
THAP9-AS1	PCNP	0.00083	yellow	yellow
THAP9-AS1	PCYT1A	6.49e-05	yellow	yellow
THAP9-AS1	PDCD10	0.000165	yellow	yellow
THAP9-AS1	PDCD11	6.57e-05	yellow	yellow
THAP9-AS1	PDCD2	3.9e-05	yellow	yellow
THAP9-AS1	PDCD7	8.04e-05	yellow	yellow
THAP9-AS1	PDCL3	3.31e-05	yellow	yellow
THAP9-AS1	PDE6D	5.26e-05	yellow	yellow
THAP9-AS1	PDE8A	1.83e-05	yellow	yellow
THAP9-AS1	PDHX	1.04e-05	yellow	yellow
THAP9-AS1	PEX13	0.000205	yellow	yellow
THAP9-AS1	PEX3	1.24e-05	yellow	yellow
THAP9-AS1	PGAM1	1.33e-05	yellow	yellow
THAP9-AS1	PGK1	1.61e-06	yellow	yellow
THAP9-AS1	PGM2	3.38e-05	yellow	yellow
THAP9-AS1	PGM3	6.44e-06	yellow	yellow
THAP9-AS1	PGRMC1	7.62e-06	yellow	yellow
THAP9-AS1	PHACTR4	0.000451	yellow	yellow
THAP9-AS1	PHF13	5.49e-05	yellow	yellow
THAP9-AS1	PHF14	5.96e-05	yellow	yellow
THAP9-AS1	PHF6	0.000311	yellow	yellow
THAP9-AS1	PHTF2	5.82e-05	yellow	yellow
THAP9-AS1	PI4K2B	0.000181	yellow	yellow
THAP9-AS1	PIGW	3.23e-05	yellow	yellow
THAP9-AS1	PIK3CB	0.0001	yellow	yellow
THAP9-AS1	PITPNB	0.000107	yellow	yellow
THAP9-AS1	PITRM1	3.2e-05	yellow	yellow
THAP9-AS1	PLAA	0.000108	yellow	yellow
THAP9-AS1	PLAGL2	8.01e-05	yellow	yellow
THAP9-AS1	PLEKHA1	1.47e-05	yellow	yellow
THAP9-AS1	PLEKHA8	1.01e-05	yellow	yellow
THAP9-AS1	PLK4	0.000315	yellow	yellow
THAP9-AS1	PLRG1	0.000144	yellow	yellow
THAP9-AS1	PMM2	1.17e-05	yellow	yellow
THAP9-AS1	PMPCB	0.000279	yellow	yellow
THAP9-AS1	PMS1	0.000617	yellow	yellow
THAP9-AS1	PNN	0.000479	yellow	yellow
THAP9-AS1	PNO1	0.000624	yellow	yellow
THAP9-AS1	PNPT1	0.000413	yellow	yellow
THAP9-AS1	PODXL	1.66e-07	yellow	yellow
THAP9-AS1	POLA1	8.04e-05	yellow	yellow
THAP9-AS1	POLA2	5.23e-05	yellow	yellow
THAP9-AS1	POLE	0.000101	yellow	yellow
THAP9-AS1	POLE2	3.19e-05	yellow	yellow
THAP9-AS1	POLE3	0.000465	yellow	yellow
THAP9-AS1	POLR1A	0.000188	yellow	yellow
THAP9-AS1	POLR1B	0.000292	yellow	yellow
THAP9-AS1	POLR2B	0.000386	yellow	yellow
THAP9-AS1	POLR2D	0.000451	yellow	yellow
THAP9-AS1	POLR3A	7.93e-06	yellow	yellow
THAP9-AS1	POLR3B	0.000101	yellow	yellow
THAP9-AS1	POLR3F	0.000143	yellow	yellow
THAP9-AS1	POM121	5.91e-05	yellow	yellow
THAP9-AS1	POM121C	0.000148	yellow	yellow
THAP9-AS1	PPAT	0.00035	yellow	yellow
THAP9-AS1	PPHLN1	0.000594	yellow	yellow
THAP9-AS1	PPID	0.000178	yellow	yellow
THAP9-AS1	PPIL1	7.7e-05	yellow	yellow
THAP9-AS1	PPIL4	0.000131	yellow	yellow
THAP9-AS1	PPM1L	6.97e-07	yellow	yellow
THAP9-AS1	PPP1CB	0.000166	yellow	yellow
THAP9-AS1	PPP1CC	0.000559	yellow	yellow
THAP9-AS1	PPP1R21	0.000382	yellow	yellow
THAP9-AS1	PPP1R8	0.001234	yellow	yellow
THAP9-AS1	PPP2R1B	4.95e-07	yellow	yellow
THAP9-AS1	PPP2R3A	1.5e-06	yellow	yellow
THAP9-AS1	PPP2R3C	1.77e-05	yellow	yellow
THAP9-AS1	PPP3R1	0.000646	yellow	yellow
THAP9-AS1	PPP4R1	5.89e-05	yellow	yellow
THAP9-AS1	PPP4R3B	0.000739	yellow	yellow
THAP9-AS1	PPRC1	0.000185	yellow	yellow
THAP9-AS1	PRIM1	0.000103	yellow	yellow
THAP9-AS1	PRKAG2	8.79e-05	yellow	yellow
THAP9-AS1	PRKCI	3.16e-05	yellow	yellow
THAP9-AS1	PRKRA	0.000417	yellow	yellow
THAP9-AS1	PRMT3	0.000106	yellow	yellow
THAP9-AS1	PRMT5	2.48e-05	yellow	yellow
THAP9-AS1	PRMT6	1.17e-05	yellow	yellow
THAP9-AS1	PROSER1	9.76e-05	yellow	yellow
THAP9-AS1	PRPF38B	0.000868	yellow	yellow
THAP9-AS1	PRPF4	0.000104	yellow	yellow
THAP9-AS1	PRPF40A	0.000485	yellow	yellow
THAP9-AS1	PRPS1	3.28e-06	yellow	yellow
THAP9-AS1	PRPS2	3.65e-06	yellow	yellow
THAP9-AS1	PSMA1	0.000141	yellow	yellow
THAP9-AS1	PSMA3	1.98e-05	yellow	yellow
THAP9-AS1	PSMA4	3.51e-05	yellow	yellow
THAP9-AS1	PSMA5	4.9e-05	yellow	yellow
THAP9-AS1	PSMA6	4.3e-06	yellow	yellow
THAP9-AS1	PSMC1	3.32e-05	yellow	yellow
THAP9-AS1	PSMC2	0.000171	yellow	yellow
THAP9-AS1	PSMC2P1	5.3e-05	yellow	yellow
THAP9-AS1	PSMC3IP	1.45e-05	yellow	yellow
THAP9-AS1	PSMC6	1.27e-05	yellow	yellow
THAP9-AS1	PSMD1	0.000227	yellow	yellow
THAP9-AS1	PSMD10	8.34e-05	yellow	yellow
THAP9-AS1	PSMD11	1.61e-06	yellow	yellow
THAP9-AS1	PSMD14	0.000213	yellow	yellow
THAP9-AS1	PSMD2	3.12e-05	yellow	yellow
THAP9-AS1	PSME3	5.65e-05	yellow	yellow
THAP9-AS1	PSME4	6.93e-05	yellow	yellow
THAP9-AS1	PSMG2	0.000181	yellow	yellow
THAP9-AS1	PSPC1	0.000544	yellow	yellow
THAP9-AS1	PSPC1P1	8.31e-06	yellow	yellow
THAP9-AS1	PTBP3	0.000221	yellow	yellow
THAP9-AS1	PTCD3	0.000653	yellow	yellow
THAP9-AS1	PTGES3	0.000255	yellow	yellow
THAP9-AS1	PTP4A1	4.07e-07	yellow	yellow
THAP9-AS1	PTPN11	0.000337	yellow	yellow
THAP9-AS1	PTPN12	0.000279	yellow	yellow
THAP9-AS1	PTPRK	1.02e-06	yellow	yellow
THAP9-AS1	PTTG1IP	3.03e-06	yellow	yellow
THAP9-AS1	PUS10	3.29e-05	yellow	yellow
THAP9-AS1	PUS3	4.18e-06	yellow	yellow
THAP9-AS1	PWP1	0.000415	yellow	yellow
THAP9-AS1	QSER1	7.25e-05	yellow	yellow
THAP9-AS1	QTRT2	0.000491	yellow	yellow
THAP9-AS1	R3HDM1	0.0002	yellow	yellow
THAP9-AS1	RAB10	0.000215	yellow	yellow
THAP9-AS1	RAB1A	0.000225	yellow	yellow
THAP9-AS1	RAB7A	0.000104	yellow	yellow
THAP9-AS1	RAB8A	1.74e-05	yellow	yellow
THAP9-AS1	RAB9A	1.07e-06	yellow	yellow
THAP9-AS1	RABGGTB	9.94e-05	yellow	yellow
THAP9-AS1	RAC1	2.4e-05	yellow	yellow
THAP9-AS1	RACGAP1	0.000153	yellow	yellow
THAP9-AS1	RAD1	0.000174	yellow	yellow
THAP9-AS1	RAD18	0.000242	yellow	yellow
THAP9-AS1	RAD23B	0.000249	yellow	yellow
THAP9-AS1	RAD54L2	0.000222	yellow	yellow
THAP9-AS1	RAF1	0.000315	yellow	yellow
THAP9-AS1	RALA	7.23e-05	yellow	yellow
THAP9-AS1	RALBP1	2.58e-05	yellow	yellow
THAP9-AS1	RAMAC	1.57e-05	yellow	yellow
THAP9-AS1	RAN	0.000276	yellow	yellow
THAP9-AS1	RANBP9	4.75e-05	yellow	yellow
THAP9-AS1	RARS2	7.82e-05	yellow	yellow
THAP9-AS1	RASA2	7e-05	yellow	yellow
THAP9-AS1	RASSF3	1.7e-06	yellow	yellow
THAP9-AS1	RBBP4	0.000282	yellow	yellow
THAP9-AS1	RBM15	0.000319	yellow	yellow
THAP9-AS1	RBM28	0.000357	yellow	yellow
THAP9-AS1	RBM48	0.000384	yellow	yellow
THAP9-AS1	RBM7	4.14e-05	yellow	yellow
THAP9-AS1	RBMX	0.003032	yellow	yellow
THAP9-AS1	RBMXL1	0.000118	yellow	yellow
THAP9-AS1	RC3H2	0.000233	yellow	yellow
THAP9-AS1	RCAN3	8.63e-05	yellow	yellow
THAP9-AS1	RCN2	1.87e-05	yellow	yellow
THAP9-AS1	RDX	2.44e-05	yellow	yellow
THAP9-AS1	RECQL	3.6e-05	yellow	yellow
THAP9-AS1	REPS1	2.36e-05	yellow	yellow
THAP9-AS1	REV3L	2.11e-05	yellow	yellow
THAP9-AS1	REXO5	3.33e-06	yellow	yellow
THAP9-AS1	RFC3	3.14e-05	yellow	yellow
THAP9-AS1	RFC5	0.000334	yellow	yellow
THAP9-AS1	RFXAP	8.6e-06	yellow	yellow
THAP9-AS1	RIF1	0.000434	yellow	yellow
THAP9-AS1	RINT1	0.000329	yellow	yellow
THAP9-AS1	RIOK3	6.96e-05	yellow	yellow
THAP9-AS1	RIOX2	7.9e-06	yellow	yellow
THAP9-AS1	RLF	0.000166	yellow	yellow
THAP9-AS1	RMC1	0.000152	yellow	yellow
THAP9-AS1	RMND5A	0.000144	yellow	yellow
THAP9-AS1	RNF149	7.78e-05	yellow	yellow
THAP9-AS1	RNF168	0.000147	yellow	yellow
THAP9-AS1	RNF214	6.52e-05	yellow	yellow
THAP9-AS1	RNF32	5.87e-06	yellow	yellow
THAP9-AS1	RNF34	0.000148	yellow	yellow
THAP9-AS1	RNGTT	0.000225	yellow	yellow
THAP9-AS1	RNMT	0.000144	yellow	yellow
THAP9-AS1	RNU2.27P	1.17e-05	yellow	NA
THAP9-AS1	RNU6.583P	2.62e-06	yellow	NA
THAP9-AS1	ROCK2	6.23e-05	yellow	yellow
THAP9-AS1	RPA1	8.59e-05	yellow	yellow
THAP9-AS1	RPE	0.000519	yellow	yellow
THAP9-AS1	RPF1	4e-05	yellow	yellow
THAP9-AS1	RPL13P8	1.02e-06	yellow	yellow
THAP9-AS1	RPL39P16	9.52e-06	yellow	yellow
THAP9-AS1	RPP30	0.00018	yellow	yellow
THAP9-AS1	RRM1	0.000172	yellow	yellow
THAP9-AS1	RSL1D1	2.28e-05	yellow	yellow
THAP9-AS1	RSRC1	0.000154	yellow	yellow
THAP9-AS1	RTCA	7.39e-05	yellow	yellow
THAP9-AS1	RTN3	4.24e-06	yellow	yellow
THAP9-AS1	RUBCN	0.000121	yellow	yellow
THAP9-AS1	RWDD1	7.02e-06	yellow	yellow
THAP9-AS1	RWDD2B	2.61e-05	yellow	yellow
THAP9-AS1	RYK	0.000146	yellow	yellow
THAP9-AS1	SAAL1	3.74e-05	yellow	yellow
THAP9-AS1	SAE1	4.01e-05	yellow	yellow
THAP9-AS1	SAP130	0.000187	yellow	yellow
THAP9-AS1	SART3	0.000279	yellow	yellow
THAP9-AS1	SASS6	0.000556	yellow	yellow
THAP9-AS1	SAV1	1.14e-05	yellow	yellow
THAP9-AS1	SBDS	8.02e-05	yellow	yellow
THAP9-AS1	SBF2.AS1	1.16e-05	yellow	NA
THAP9-AS1	SBK1	6.43e-07	yellow	yellow
THAP9-AS1	SBNO1	0.000113	yellow	yellow
THAP9-AS1	SCAF4	0.000346	yellow	yellow
THAP9-AS1	SCFD2	0.000109	yellow	yellow
THAP9-AS1	SCYL2	0.000257	yellow	yellow
THAP9-AS1	SDAD1	0.000674	yellow	yellow
THAP9-AS1	SDHD	2.25e-05	yellow	yellow
THAP9-AS1	SEC11A	1.59e-05	yellow	yellow
THAP9-AS1	SEC22A	0.000187	yellow	yellow
THAP9-AS1	SEC61A1	7.61e-06	yellow	yellow
THAP9-AS1	SEC61A2	2.82e-05	yellow	yellow
THAP9-AS1	SEC63	3.88e-06	yellow	yellow
THAP9-AS1	SEC63P1	2.18e-07	yellow	yellow
THAP9-AS1	SELENOF	0.000111	yellow	yellow
THAP9-AS1	SELENOI	0.000138	yellow	yellow
THAP9-AS1	SENP1	0.000625	yellow	yellow
THAP9-AS1	SENP5	0.000236	yellow	yellow
THAP9-AS1	SEPTIN7	0.000246	yellow	yellow
THAP9-AS1	SERAC1	1.83e-05	yellow	yellow
THAP9-AS1	SERTAD2	0.000106	yellow	yellow
THAP9-AS1	SET	0.000944	yellow	yellow
THAP9-AS1	SETD5	0.000335	yellow	yellow
THAP9-AS1	SETMAR	3.26e-06	yellow	yellow
THAP9-AS1	SETSIP	4.58e-06	yellow	yellow
THAP9-AS1	SFPQ	0.002577	yellow	yellow
THAP9-AS1	SFR1	2.32e-05	yellow	yellow
THAP9-AS1	SFT2D1	1.45e-05	yellow	yellow
THAP9-AS1	SGO2	0.0003	yellow	yellow
THAP9-AS1	SIKE1	0.000218	yellow	yellow
THAP9-AS1	SLBP	0.000196	yellow	yellow
THAP9-AS1	SLC12A8	7.14e-07	yellow	yellow
THAP9-AS1	SLC15A4	0.000189	yellow	yellow
THAP9-AS1	SLC17A5	1.86e-06	yellow	yellow
THAP9-AS1	SLC25A13	4.78e-05	yellow	yellow
THAP9-AS1	SLC25A3	3.56e-05	yellow	yellow
THAP9-AS1	SLC25A43	2.45e-05	yellow	yellow
THAP9-AS1	SLC25A5	1.09e-05	yellow	yellow
THAP9-AS1	SLC25A53	2.54e-05	yellow	yellow
THAP9-AS1	SLC30A6	0.000375	yellow	yellow
THAP9-AS1	SLC31A1	1.4e-05	yellow	yellow
THAP9-AS1	SLC33A1	1.94e-05	yellow	yellow
THAP9-AS1	SLC35F6	1.12e-06	yellow	yellow
THAP9-AS1	SLC37A3	7.53e-05	yellow	yellow
THAP9-AS1	SLC39A14	1.13e-06	yellow	yellow
THAP9-AS1	SLC4A1AP	0.000286	yellow	yellow
THAP9-AS1	SMAP1	6.49e-05	yellow	yellow
THAP9-AS1	SMARCAL1	0.000124	yellow	yellow
THAP9-AS1	SMARCC1	0.000132	yellow	yellow
THAP9-AS1	SMARCD1	0.000609	yellow	yellow
THAP9-AS1	SMC1A	0.000112	yellow	yellow
THAP9-AS1	SMC2	0.000274	yellow	yellow
THAP9-AS1	SMC3	0.000481	yellow	yellow
THAP9-AS1	SMC4	0.000174	yellow	yellow
THAP9-AS1	SMC5	0.000213	yellow	yellow
THAP9-AS1	SMC6	0.000284	yellow	yellow
THAP9-AS1	SMCHD1	0.000172	yellow	yellow
THAP9-AS1	SMIM13	5.17e-05	yellow	yellow
THAP9-AS1	SMIM30	2.65e-05	yellow	yellow
THAP9-AS1	SMNDC1	0.00133	yellow	yellow
THAP9-AS1	SMPD4	3.49e-05	yellow	yellow
THAP9-AS1	SMS	3.63e-06	yellow	yellow
THAP9-AS1	SMURF1	4.41e-05	yellow	yellow
THAP9-AS1	SNAPC1	2.71e-05	yellow	yellow
THAP9-AS1	SNHG16	1.17e-05	yellow	yellow
THAP9-AS1	SNN	4.18e-07	yellow	yellow
THAP9-AS1	SNRNP200	0.000164	yellow	yellow
THAP9-AS1	SNRNP27	0.000523	yellow	yellow
THAP9-AS1	SNRNP40	0.000241	yellow	yellow
THAP9-AS1	SNX3	2.08e-06	yellow	yellow
THAP9-AS1	SNX4	0.000247	yellow	yellow
THAP9-AS1	SNX6	6.34e-05	yellow	yellow
THAP9-AS1	SNX7	1.97e-06	yellow	yellow
THAP9-AS1	SOAT1	1.68e-07	yellow	yellow
THAP9-AS1	SORT1	6.66e-06	yellow	yellow
THAP9-AS1	SOS1	0.000301	yellow	yellow
THAP9-AS1	SPAST	0.000446	yellow	yellow
THAP9-AS1	SPATS2	0.000143	yellow	yellow
THAP9-AS1	SPC25	8.8e-05	yellow	yellow
THAP9-AS1	SPDL1	0.000521	yellow	yellow
THAP9-AS1	SPDYE3	4.55e-05	yellow	yellow
THAP9-AS1	SPG21	8.36e-05	yellow	yellow
THAP9-AS1	SPIN4	4.56e-05	yellow	yellow
THAP9-AS1	SPRING1	5.37e-06	yellow	yellow
THAP9-AS1	SPTBN1	1.57e-05	yellow	yellow
THAP9-AS1	SPTSSA	8.41e-08	yellow	yellow
THAP9-AS1	SRP72	0.0003	yellow	yellow
THAP9-AS1	SRPRA	1.12e-06	yellow	yellow
THAP9-AS1	SRPRB	1.73e-05	yellow	yellow
THAP9-AS1	SRRM1	0.00089	yellow	yellow
THAP9-AS1	SRSF1	0.002271	yellow	yellow
THAP9-AS1	SRSF10	0.003276	yellow	yellow
THAP9-AS1	SRSF2	0.002662	yellow	yellow
THAP9-AS1	SRSF3	0.003874	yellow	yellow
THAP9-AS1	SRSF7	0.003592	yellow	yellow
THAP9-AS1	SRSF8	2.75e-06	yellow	yellow
THAP9-AS1	SS18	0.000149	yellow	yellow
THAP9-AS1	SSB	0.000615	yellow	yellow
THAP9-AS1	SSR1	7.46e-05	yellow	yellow
THAP9-AS1	SSR3	2.58e-05	yellow	yellow
THAP9-AS1	SSX2IP	7.41e-05	yellow	yellow
THAP9-AS1	ST6GAL1	1.98e-09	yellow	yellow
THAP9-AS1	STAG1	0.00022	yellow	yellow
THAP9-AS1	STAG3L4	2.62e-06	yellow	yellow
THAP9-AS1	STAM	0.000426	yellow	yellow
THAP9-AS1	STAMBP	0.000512	yellow	yellow
THAP9-AS1	STARD7	0.000511	yellow	yellow
THAP9-AS1	STIP1	6.19e-06	yellow	yellow
THAP9-AS1	STK24	8.92e-06	yellow	yellow
THAP9-AS1	STK26	1.1e-07	yellow	yellow
THAP9-AS1	STK38L	1.29e-07	yellow	yellow
THAP9-AS1	STMP1	0.000123	yellow	yellow
THAP9-AS1	STPG1	1.76e-05	yellow	yellow
THAP9-AS1	STRN	0.000284	yellow	yellow
THAP9-AS1	STT3A	1.24e-05	yellow	yellow
THAP9-AS1	STX3	9.93e-06	yellow	yellow
THAP9-AS1	SUMO1	0.000505	yellow	yellow
THAP9-AS1	SUMO2	2.9e-05	yellow	yellow
THAP9-AS1	SUN1	2.07e-05	yellow	yellow
THAP9-AS1	SUPT16H	0.000185	yellow	yellow
THAP9-AS1	SUPT7L	0.000584	yellow	yellow
THAP9-AS1	SURF4	1.64e-05	yellow	yellow
THAP9-AS1	SVIL.AS1	4.8e-05	yellow	NA
THAP9-AS1	SYNCRIP	0.000305	yellow	yellow
THAP9-AS1	TAB2	5.33e-05	yellow	yellow
THAP9-AS1	TADA2A	2.29e-05	yellow	yellow
THAP9-AS1	TAF13	3.93e-05	yellow	yellow
THAP9-AS1	TAF1B	0.000121	yellow	yellow
THAP9-AS1	TAMM41	0.000222	yellow	yellow
THAP9-AS1	TANK	6.67e-05	yellow	yellow
THAP9-AS1	TARDBP	0.003653	yellow	yellow
THAP9-AS1	TARS1	3.92e-05	yellow	yellow
THAP9-AS1	TASOR2	2.83e-06	yellow	yellow
THAP9-AS1	TATDN2	5.44e-05	yellow	yellow
THAP9-AS1	TBC1D23	0.000136	yellow	yellow
THAP9-AS1	TBC1D4	2.64e-06	yellow	yellow
THAP9-AS1	TBCCD1	0.000146	yellow	yellow
THAP9-AS1	TBP	0.000303	yellow	yellow
THAP9-AS1	TCAIM	0.000343	yellow	yellow
THAP9-AS1	TCERG1	0.002868	yellow	yellow
THAP9-AS1	TCF20	3.28e-05	yellow	yellow
THAP9-AS1	TCP1	5.48e-05	yellow	yellow
THAP9-AS1	TCP11L1	6.71e-06	yellow	yellow
THAP9-AS1	TCP1P3	3.85e-07	yellow	yellow
THAP9-AS1	TDG	0.000321	yellow	yellow
THAP9-AS1	TDP1	0.000102	yellow	yellow
THAP9-AS1	TDP2	5.2e-05	yellow	yellow
THAP9-AS1	TEX261	0.000193	yellow	yellow
THAP9-AS1	TFAM	0.000145	yellow	yellow
THAP9-AS1	TFB1M	2.33e-05	yellow	yellow
THAP9-AS1	TFG	6.33e-05	yellow	yellow
THAP9-AS1	TFRC	1.36e-06	yellow	yellow
THAP9-AS1	TGDS	6.67e-05	yellow	yellow
THAP9-AS1	THADA	0.000103	yellow	yellow
THAP9-AS1	THAP9.AS1	1	yellow	NA
THAP9-AS1	THOC1	0.000315	yellow	yellow
THAP9-AS1	THUMPD2	0.00121	yellow	yellow
THAP9-AS1	THUMPD3	0.000217	yellow	yellow
THAP9-AS1	TIA1	0.000849	yellow	yellow
THAP9-AS1	TIAL1	0.000722	yellow	yellow
THAP9-AS1	TIGAR	7.2e-06	yellow	yellow
THAP9-AS1	TIMELESS	5.61e-05	yellow	yellow
THAP9-AS1	TIMM21	8.17e-05	yellow	yellow
THAP9-AS1	TIMM23B	7.57e-05	yellow	yellow
THAP9-AS1	TIPIN	0.000141	yellow	yellow
THAP9-AS1	TJP2	4e-05	yellow	yellow
THAP9-AS1	TM2D3	9.11e-06	yellow	yellow
THAP9-AS1	TM7SF3	4.1e-06	yellow	yellow
THAP9-AS1	TMED2	4.23e-05	yellow	yellow
THAP9-AS1	TMEM106C	1.77e-05	yellow	yellow
THAP9-AS1	TMEM117	2.58e-06	yellow	yellow
THAP9-AS1	TMEM126B	2.45e-05	yellow	yellow
THAP9-AS1	TMEM165	7.54e-05	yellow	yellow
THAP9-AS1	TMEM17	9.43e-06	yellow	yellow
THAP9-AS1	TMEM18	0.000125	yellow	yellow
THAP9-AS1	TMEM182	1.66e-05	yellow	yellow
THAP9-AS1	TMEM185B	0.000109	yellow	yellow
THAP9-AS1	TMEM237	0.000107	yellow	yellow
THAP9-AS1	TMEM242	3.48e-06	yellow	yellow
THAP9-AS1	TMEM39A	0.00012	yellow	yellow
THAP9-AS1	TMEM41A	2.84e-05	yellow	yellow
THAP9-AS1	TMEM50A	5.23e-05	yellow	yellow
THAP9-AS1	TMPO	0.000392	yellow	yellow
THAP9-AS1	TMPPE	4.35e-06	yellow	yellow
THAP9-AS1	TMTC4	5.42e-06	yellow	yellow
THAP9-AS1	TMX4	1.38e-08	yellow	yellow
THAP9-AS1	TNFRSF10A	5.95e-07	yellow	yellow
THAP9-AS1	TNPO2	9.01e-05	yellow	yellow
THAP9-AS1	TNPO3	0.00032	yellow	yellow
THAP9-AS1	TOMM70	0.00025	yellow	yellow
THAP9-AS1	TOPBP1	0.000433	yellow	yellow
THAP9-AS1	TPI1P2	2.81e-06	yellow	yellow
THAP9-AS1	TPMT	8.88e-07	yellow	yellow
THAP9-AS1	TPP2	9.69e-05	yellow	yellow
THAP9-AS1	TPRKB	7.15e-05	yellow	yellow
THAP9-AS1	TRA2A	0.000214	yellow	yellow
THAP9-AS1	TRA2B	0.002422	yellow	yellow
THAP9-AS1	TRAPPC10	7.25e-05	yellow	yellow
THAP9-AS1	TRIM24	4.69e-05	yellow	yellow
THAP9-AS1	TRIM59	1.58e-05	yellow	yellow
THAP9-AS1	TRMT10C	0.000495	yellow	yellow
THAP9-AS1	TRMT61B	0.000138	yellow	yellow
THAP9-AS1	TRNT1	0.000281	yellow	yellow
THAP9-AS1	TRRAP	0.000143	yellow	yellow
THAP9-AS1	TSC22D2	2.74e-05	yellow	yellow
THAP9-AS1	TSN	0.000149	yellow	yellow
THAP9-AS1	TSR1	6.19e-05	yellow	yellow
THAP9-AS1	TTC27	0.000329	yellow	yellow
THAP9-AS1	TTC7B	2.05e-06	yellow	yellow
THAP9-AS1	TTC9C	8.16e-05	yellow	yellow
THAP9-AS1	TTF1	0.00043	yellow	yellow
THAP9-AS1	TTF2	7.22e-05	yellow	yellow
THAP9-AS1	TTL	8.89e-05	yellow	yellow
THAP9-AS1	TUBA1A	6.41e-07	yellow	yellow
THAP9-AS1	TUBA1B	0.000104	yellow	yellow
THAP9-AS1	TUBE1	6.46e-05	yellow	yellow
THAP9-AS1	TUG1	0.00019	yellow	yellow
THAP9-AS1	TUSC3	3.39e-08	yellow	yellow
THAP9-AS1	TWNK	3.1e-05	yellow	yellow
THAP9-AS1	TXLNG	7.64e-05	yellow	yellow
THAP9-AS1	TXNDC9	0.000173	yellow	yellow
THAP9-AS1	TXNL1	3.07e-05	yellow	yellow
THAP9-AS1	TXNRD1	1.9e-05	yellow	yellow
THAP9-AS1	TXNRD3	9.14e-06	yellow	yellow
THAP9-AS1	U2SURP	0.001056	yellow	yellow
THAP9-AS1	UBA3	0.000244	yellow	yellow
THAP9-AS1	UBA6	0.000665	yellow	yellow
THAP9-AS1	UBE2A	0.00012	yellow	yellow
THAP9-AS1	UBE2D1	3.63e-05	yellow	yellow
THAP9-AS1	UBE2D2	0.000243	yellow	yellow
THAP9-AS1	UBE2D4	2.35e-05	yellow	yellow
THAP9-AS1	UBE2E1	0.000237	yellow	yellow
THAP9-AS1	UBE2N	7.31e-05	yellow	yellow
THAP9-AS1	UBE2Q2P2	2.01e-05	yellow	yellow
THAP9-AS1	UBE3C	0.000176	yellow	yellow
THAP9-AS1	UBE4B	7.97e-05	yellow	yellow
THAP9-AS1	UBQLN1	0.000405	yellow	yellow
THAP9-AS1	UBXN7	0.000249	yellow	yellow
THAP9-AS1	UGGT1	6.03e-05	yellow	yellow
THAP9-AS1	UGP2	1.6e-05	yellow	yellow
THAP9-AS1	UHRF2	0.000344	yellow	yellow
THAP9-AS1	UIMC1	0.000216	yellow	yellow
THAP9-AS1	UMPS	0.000173	yellow	yellow
THAP9-AS1	UNG	9.27e-05	yellow	yellow
THAP9-AS1	UPF2	0.000106	yellow	yellow
THAP9-AS1	URB1	1.29e-05	yellow	yellow
THAP9-AS1	USP13	2.98e-06	yellow	yellow
THAP9-AS1	USP15	0.000214	yellow	yellow
THAP9-AS1	USP24	0.000108	yellow	yellow
THAP9-AS1	USP28	4.07e-05	yellow	yellow
THAP9-AS1	USP31	3.72e-05	yellow	yellow
THAP9-AS1	USP36	1.11e-05	yellow	yellow
THAP9-AS1	USP39	0.000484	yellow	yellow
THAP9-AS1	UTP14A	0.000107	yellow	yellow
THAP9-AS1	UTP20	5.49e-05	yellow	yellow
THAP9-AS1	UTP3	0.000234	yellow	yellow
THAP9-AS1	UTP6	4.93e-05	yellow	yellow
THAP9-AS1	VAMP7	7e-05	yellow	yellow
THAP9-AS1	VBP1	0.00016	yellow	yellow
THAP9-AS1	VDAC2	7.1e-06	yellow	yellow
THAP9-AS1	VGLL4	1.66e-05	yellow	yellow
THAP9-AS1	VKORC1L1	0.000173	yellow	yellow
THAP9-AS1	VMA21	0.000116	yellow	yellow
THAP9-AS1	VPS26C	0.000108	yellow	yellow
THAP9-AS1	VPS29	0.000201	yellow	yellow
THAP9-AS1	VPS54	0.000264	yellow	yellow
THAP9-AS1	VRK1	8.54e-05	yellow	yellow
THAP9-AS1	VTA1	7.8e-05	yellow	yellow
THAP9-AS1	WAC	0.000782	yellow	yellow
THAP9-AS1	WDCP	0.000261	yellow	yellow
THAP9-AS1	WDHD1	9.51e-05	yellow	yellow
THAP9-AS1	WDPCP	2.62e-05	yellow	yellow
THAP9-AS1	WDR12	0.00072	yellow	yellow
THAP9-AS1	WDR33	0.00031	yellow	yellow
THAP9-AS1	WDR37	3.02e-05	yellow	yellow
THAP9-AS1	WDR43	0.000687	yellow	yellow
THAP9-AS1	WDR45B	2.12e-06	yellow	yellow
THAP9-AS1	WDR53	0.000138	yellow	yellow
THAP9-AS1	WDR70	2.09e-05	yellow	yellow
THAP9-AS1	WDR75	0.000144	yellow	yellow
THAP9-AS1	WDR76	7.41e-05	yellow	yellow
THAP9-AS1	WDSUB1	7.98e-05	yellow	yellow
THAP9-AS1	WNK1	4.14e-05	yellow	yellow
THAP9-AS1	WSB2	3.94e-05	yellow	yellow
THAP9-AS1	WTAP	0.000296	yellow	yellow
THAP9-AS1	XPO1	0.001548	yellow	yellow
THAP9-AS1	XPO4	0.000152	yellow	yellow
THAP9-AS1	XPO6	5.88e-05	yellow	yellow
THAP9-AS1	XPO7	3.33e-05	yellow	yellow
THAP9-AS1	XPOT	6.97e-05	yellow	yellow
THAP9-AS1	XPOTP1	1.9e-05	yellow	yellow
THAP9-AS1	XRCC5	0.000437	yellow	yellow
THAP9-AS1	XRN1	0.000116	yellow	yellow
THAP9-AS1	XYLB	7.95e-06	yellow	yellow
THAP9-AS1	YIPF4	0.000334	yellow	yellow
THAP9-AS1	YME1L1	0.000324	yellow	yellow
THAP9-AS1	YTHDF2	0.000547	yellow	yellow
THAP9-AS1	YWHAG	0.000109	yellow	yellow
THAP9-AS1	YWHAQ	0.000119	yellow	yellow
THAP9-AS1	ZBTB21	4.93e-05	yellow	yellow
THAP9-AS1	ZBTB24	1.5e-06	yellow	yellow
THAP9-AS1	ZBTB33	7.32e-05	yellow	yellow
THAP9-AS1	ZBTB39	0.000202	yellow	yellow
THAP9-AS1	ZC3H15	0.00059	yellow	yellow
THAP9-AS1	ZC3H8	0.000814	yellow	yellow
THAP9-AS1	ZC3HAV1L	6.04e-05	yellow	yellow
THAP9-AS1	ZC3HC1	0.000249	yellow	yellow
THAP9-AS1	ZDHHC13	0.000103	yellow	yellow
THAP9-AS1	ZDHHC20	7.25e-05	yellow	yellow
THAP9-AS1	ZDHHC23	2.86e-05	yellow	yellow
THAP9-AS1	ZDHHC5	8.02e-06	yellow	yellow
THAP9-AS1	ZDHHC6	0.000384	yellow	yellow
THAP9-AS1	ZDHHC9	8.52e-06	yellow	yellow
THAP9-AS1	ZFAND5	0.000152	yellow	yellow
THAP9-AS1	ZFP69	3.51e-05	yellow	yellow
THAP9-AS1	ZFP69B	1.02e-05	yellow	yellow
THAP9-AS1	ZFP82	7.21e-05	yellow	yellow
THAP9-AS1	ZFR	0.000644	yellow	yellow
THAP9-AS1	ZGRF1	0.001443	yellow	yellow
THAP9-AS1	ZNF121	5.85e-05	yellow	yellow
THAP9-AS1	ZNF131	0.00058	yellow	yellow
THAP9-AS1	ZNF146	0.000188	yellow	yellow
THAP9-AS1	ZNF184	0.000164	yellow	yellow
THAP9-AS1	ZNF195	0.000272	yellow	yellow
THAP9-AS1	ZNF202	1.95e-05	yellow	yellow
THAP9-AS1	ZNF229	5.19e-08	yellow	yellow
THAP9-AS1	ZNF256	1.51e-06	yellow	yellow
THAP9-AS1	ZNF260	0.000174	yellow	yellow
THAP9-AS1	ZNF273	3.34e-05	yellow	yellow
THAP9-AS1	ZNF280C	0.000208	yellow	yellow
THAP9-AS1	ZNF292	7.14e-05	yellow	yellow
THAP9-AS1	ZNF3	0.000326	yellow	yellow
THAP9-AS1	ZNF318	6.65e-05	yellow	yellow
THAP9-AS1	ZNF35	0.000217	yellow	yellow
THAP9-AS1	ZNF354A	0.000334	yellow	yellow
THAP9-AS1	ZNF367	9.63e-05	yellow	yellow
THAP9-AS1	ZNF398	0.000252	yellow	yellow
THAP9-AS1	ZNF451	0.000153	yellow	yellow
THAP9-AS1	ZNF473	7.26e-05	yellow	yellow
THAP9-AS1	ZNF485	7.51e-06	yellow	yellow
THAP9-AS1	ZNF507	0.000235	yellow	yellow
THAP9-AS1	ZNF512	5.96e-05	yellow	yellow
THAP9-AS1	ZNF518B	6.44e-06	yellow	yellow
THAP9-AS1	ZNF529	0.000179	yellow	yellow
THAP9-AS1	ZNF530	2.56e-06	yellow	yellow
THAP9-AS1	ZNF544	8.3e-06	yellow	yellow
THAP9-AS1	ZNF562	0.000118	yellow	yellow
THAP9-AS1	ZNF566	0.000176	yellow	yellow
THAP9-AS1	ZNF567	0.000286	yellow	yellow
THAP9-AS1	ZNF569	2.9e-05	yellow	yellow
THAP9-AS1	ZNF600	1.42e-05	yellow	yellow
THAP9-AS1	ZNF607	2.51e-05	yellow	yellow
THAP9-AS1	ZNF618	5.13e-05	yellow	yellow
THAP9-AS1	ZNF639	3.91e-05	yellow	yellow
THAP9-AS1	ZNF644	0.000246	yellow	yellow
THAP9-AS1	ZNF670	6.28e-05	yellow	yellow
THAP9-AS1	ZNF714	1.16e-05	yellow	yellow
THAP9-AS1	ZNF724	4.15e-05	yellow	yellow
THAP9-AS1	ZNF77	5.08e-05	yellow	yellow
THAP9-AS1	ZNF829	7.35e-05	yellow	yellow
THAP9-AS1	ZNF85	3.4e-05	yellow	yellow
THAP9-AS1	ZNF850	2.15e-06	yellow	yellow
THAP9-AS1	ZNF878	9.37e-07	yellow	yellow
THAP9-AS1	ZNF879	7.57e-06	yellow	yellow
THAP9-AS1	ZNHIT6	8.35e-07	yellow	yellow
THAP9-AS1	ZRANB2	0.001618	yellow	yellow
THAP9-AS1	ZSCAN21	0.000141	yellow	yellow
THAP9-AS1	ZUP1	6.75e-05	yellow	yellow
THAP9-AS1	ZW10	9.08e-05	yellow	yellow
THAP9-AS1	ZWILCH	0.000192	yellow	yellow
THAP9-AS1	ZWINT	1.62e-05	yellow	yellow

## Sheet: CHOL_normal
gene1	gene2	correlation	module1	module2
THAP9-AS1	A2M	0.029524	darkgrey	darkgrey
THAP9-AS1	A2M.AS1	0.010296	darkgrey	NA
THAP9-AS1	ACTG1P25	0.023955	darkgrey	darkgrey
THAP9-AS1	ADAMTS8	0.002868	darkgrey	darkgrey
THAP9-AS1	ADCY2	0.037418	darkgrey	darkgrey
THAP9-AS1	ANKAR	0.003643	darkgrey	darkgrey
THAP9-AS1	ANKRD24	0.054097	darkgrey	darkgrey
THAP9-AS1	ARHGEF38	0.029304	darkgrey	darkgrey
THAP9-AS1	ARMCX4	0.074728	darkgrey	darkgrey
THAP9-AS1	ARMCX6	0.006362	darkgrey	darkgrey
THAP9-AS1	ASB3	0.071497	darkgrey	darkgrey
THAP9-AS1	ATL1	0.004083	darkgrey	darkgrey
THAP9-AS1	ATP2B1.AS1	0.000349	darkgrey	NA
THAP9-AS1	ATXN2L	0.053553	darkgrey	darkgrey
THAP9-AS1	BCL9	0.005223	darkgrey	darkgrey
THAP9-AS1	BDKRB1	0.056185	darkgrey	darkgrey
THAP9-AS1	C3orf62	0.013822	darkgrey	darkgrey
THAP9-AS1	C7orf50	0.124848	darkgrey	darkgrey
THAP9-AS1	CACNA1F	0.051955	darkgrey	darkgrey
THAP9-AS1	CALN1	0.002667	darkgrey	darkgrey
THAP9-AS1	CAP2	0.039599	darkgrey	darkgrey
THAP9-AS1	CBLN4	0.000707	darkgrey	darkgrey
THAP9-AS1	CC2D2A	9.24e-05	darkgrey	darkgrey
THAP9-AS1	CCDC174	0.083945	darkgrey	darkgrey
THAP9-AS1	CCDC66	0.180761	darkgrey	darkgrey
THAP9-AS1	CCDC78	0.011085	darkgrey	darkgrey
THAP9-AS1	CCNG2	0.001397	darkgrey	darkgrey
THAP9-AS1	CD200	0.001427	darkgrey	darkgrey
THAP9-AS1	CENPP	0.146204	darkgrey	darkgrey
THAP9-AS1	CEP68	0.001246	darkgrey	darkgrey
THAP9-AS1	CFAP298	0.174529	darkgrey	darkgrey
THAP9-AS1	CFAP47	0.001287	darkgrey	darkgrey
THAP9-AS1	CLK4	0.030255	darkgrey	darkgrey
THAP9-AS1	CSPG4P10	0.015288	darkgrey	darkgrey
THAP9-AS1	CT75	0.020442	darkgrey	darkgrey
THAP9-AS1	CYB5RL	0.224903	darkgrey	darkgrey
THAP9-AS1	CYP4F26P	0.043295	darkgrey	darkgrey
THAP9-AS1	CYS1	0.003046	darkgrey	darkgrey
THAP9-AS1	DALRD3	0.100924	darkgrey	darkgrey
THAP9-AS1	DBF4B	0.249898	darkgrey	darkgrey
THAP9-AS1	DBIL5P2	0.076823	darkgrey	darkgrey
THAP9-AS1	DCAF15	0.02733	darkgrey	darkgrey
THAP9-AS1	DNAJC18	0.000299	darkgrey	darkgrey
THAP9-AS1	DTX2	0.043088	darkgrey	darkgrey
THAP9-AS1	DUSP28	0.003106	darkgrey	darkgrey
THAP9-AS1	DVL2	0.040578	darkgrey	darkgrey
THAP9-AS1	ENC1	0.069831	darkgrey	darkgrey
THAP9-AS1	FAM135B	0.002773	darkgrey	darkgrey
THAP9-AS1	FAM219A	0.024536	darkgrey	darkgrey
THAP9-AS1	FAM76B	0.099545	darkgrey	darkgrey
THAP9-AS1	FBRS	0.229826	darkgrey	darkgrey
THAP9-AS1	FLJ31104	0.064573	darkgrey	darkgrey
THAP9-AS1	FMN1	0.015141	darkgrey	darkgrey
THAP9-AS1	GABPB2	0.02183	darkgrey	darkgrey
THAP9-AS1	GCNT1P3	0.230309	darkgrey	darkgrey
THAP9-AS1	GSTM2	0.026371	darkgrey	darkgrey
THAP9-AS1	HLA.F.AS1	0.009546	darkgrey	NA
THAP9-AS1	HTD2	0.101248	darkgrey	darkgrey
THAP9-AS1	IFT52	0.000981	darkgrey	darkgrey
THAP9-AS1	IGHEP2	0.037418	darkgrey	darkgrey
THAP9-AS1	IQCC	0.046516	darkgrey	darkgrey
THAP9-AS1	IRF5	0.000507	darkgrey	darkgrey
THAP9-AS1	KCNQ4	0.001025	darkgrey	darkgrey
THAP9-AS1	KCTD13	0.025378	darkgrey	darkgrey
THAP9-AS1	KLC2	0.112926	darkgrey	darkgrey
THAP9-AS1	KRBOX4	0.064738	darkgrey	darkgrey
THAP9-AS1	KRI1	0.004923	darkgrey	darkgrey
THAP9-AS1	LEMD2	0.04262	darkgrey	darkgrey
THAP9-AS1	LENG8.AS1	0.005865	darkgrey	NA
THAP9-AS1	LIN9	0.007296	darkgrey	darkgrey
THAP9-AS1	LIX1L.AS1	0.040462	darkgrey	NA
THAP9-AS1	LRCH4	0.059699	darkgrey	darkgrey
THAP9-AS1	LRRC46	0.109173	darkgrey	darkgrey
THAP9-AS1	LTC4S	0.208363	darkgrey	darkgrey
THAP9-AS1	MDC1	0.024338	darkgrey	darkgrey
THAP9-AS1	MECP2	0.002768	darkgrey	darkgrey
THAP9-AS1	MED25	0.009576	darkgrey	darkgrey
THAP9-AS1	MEIS2	0.001542	darkgrey	darkgrey
THAP9-AS1	METTL3	0.031111	darkgrey	darkgrey
THAP9-AS1	METTL6	0.103029	darkgrey	darkgrey
THAP9-AS1	MFSD4A	0.008045	darkgrey	darkgrey
THAP9-AS1	MIR181A2HG	0.001186	darkgrey	darkgrey
THAP9-AS1	MIR378B	0.038715	darkgrey	darkgrey
THAP9-AS1	MOGAT3	0.083941	darkgrey	darkgrey
THAP9-AS1	MSANTD2	0.047549	darkgrey	darkgrey
THAP9-AS1	MTA3	0.005057	darkgrey	darkgrey
THAP9-AS1	NASP	0.264897	darkgrey	darkgrey
THAP9-AS1	NBDY	0.000757	darkgrey	darkgrey
THAP9-AS1	NDRG4	0.030011	darkgrey	darkgrey
THAP9-AS1	NPIPB2	4.7e-05	darkgrey	darkgrey
THAP9-AS1	NSUN7	0.000474	darkgrey	darkgrey
THAP9-AS1	OTOGL	0.016951	darkgrey	darkgrey
THAP9-AS1	PAN3	0.0847	darkgrey	darkgrey
THAP9-AS1	PANK4	0.000903	darkgrey	darkgrey
THAP9-AS1	PAPSS1	0.045824	darkgrey	darkgrey
THAP9-AS1	PARP15	0.020054	darkgrey	darkgrey
THAP9-AS1	PASK	0.086465	darkgrey	darkgrey
THAP9-AS1	PAXBP1.AS1	0.011319	darkgrey	NA
THAP9-AS1	PCF11	0.153581	darkgrey	darkgrey
THAP9-AS1	PDE3A	0.000683	darkgrey	darkgrey
THAP9-AS1	PHF21A	0.004955	darkgrey	darkgrey
THAP9-AS1	PIAS3	0.005536	darkgrey	darkgrey
THAP9-AS1	PLA2G4B	0.004104	darkgrey	darkgrey
THAP9-AS1	PNOC	0.009309	darkgrey	darkgrey
THAP9-AS1	POLR2J3	0.009199	darkgrey	darkgrey
THAP9-AS1	PPP1R36	0.031669	darkgrey	darkgrey
THAP9-AS1	PPWD1	0.113226	darkgrey	darkgrey
THAP9-AS1	PRDM11	0.009415	darkgrey	darkgrey
THAP9-AS1	PRKAB1	0.133102	darkgrey	darkgrey
THAP9-AS1	PRKD2	0.005779	darkgrey	darkgrey
THAP9-AS1	PRPF3	0.060177	darkgrey	darkgrey
THAP9-AS1	PTCH1	0.006496	darkgrey	darkgrey
THAP9-AS1	QRFP	0.009915	darkgrey	darkgrey
THAP9-AS1	RABEP2	0.00168	darkgrey	darkgrey
THAP9-AS1	RBM5	0.117882	darkgrey	darkgrey
THAP9-AS1	RBMX2	0.02975	darkgrey	darkgrey
THAP9-AS1	RFX3	0.035207	darkgrey	darkgrey
THAP9-AS1	RNU4.52P	0.00686	darkgrey	NA
THAP9-AS1	RNU6.1098P	0.064184	darkgrey	NA
THAP9-AS1	RPIA	0.053881	darkgrey	darkgrey
THAP9-AS1	RPL21P95	0.050333	darkgrey	darkgrey
THAP9-AS1	RPL5P12	0.058483	darkgrey	darkgrey
THAP9-AS1	RPL5P18	0.020807	darkgrey	darkgrey
THAP9-AS1	S100PBP	0.075195	darkgrey	darkgrey
THAP9-AS1	SAMD1	0.019904	darkgrey	darkgrey
THAP9-AS1	SENP7	0.017733	darkgrey	darkgrey
THAP9-AS1	SERHL2	0.016075	darkgrey	darkgrey
THAP9-AS1	SFT2D1	0.085122	darkgrey	darkgrey
THAP9-AS1	SKOR1	0.051315	darkgrey	darkgrey
THAP9-AS1	SLC18B1	0.179565	darkgrey	darkgrey
THAP9-AS1	SLC6A9	0.14255	darkgrey	darkgrey
THAP9-AS1	SNCAIP	0.005053	darkgrey	darkgrey
THAP9-AS1	SPATS2	0.006239	darkgrey	darkgrey
THAP9-AS1	SPRED1	0.000778	darkgrey	darkgrey
THAP9-AS1	ST7.AS2	0.003918	darkgrey	NA
THAP9-AS1	STPG1	0.013026	darkgrey	darkgrey
THAP9-AS1	STRN4	0.028507	darkgrey	darkgrey
THAP9-AS1	SUPT3H	0.000163	darkgrey	darkgrey
THAP9-AS1	TAS2R6P	0.008055	darkgrey	darkgrey
THAP9-AS1	TBX20	0.002856	darkgrey	darkgrey
THAP9-AS1	THAP9.AS1	1	darkgrey	NA
THAP9-AS1	TJAP1	0.048133	darkgrey	darkgrey
THAP9-AS1	TJP3	0.000754	darkgrey	darkgrey
THAP9-AS1	TMEM107	0.012894	darkgrey	darkgrey
THAP9-AS1	TMEM130	0.011847	darkgrey	darkgrey
THAP9-AS1	TMEM67	0.046584	darkgrey	darkgrey
THAP9-AS1	TRIM13	0.042383	darkgrey	darkgrey
THAP9-AS1	TRIM52	0.040066	darkgrey	darkgrey
THAP9-AS1	TRIM59	0.008062	darkgrey	darkgrey
THAP9-AS1	TUBB2B	0.006927	darkgrey	darkgrey
THAP9-AS1	UBAP2L	0.07397	darkgrey	darkgrey
THAP9-AS1	UBE2Q1.AS1	0.002286	darkgrey	NA
THAP9-AS1	WHRN	0.186254	darkgrey	darkgrey
THAP9-AS1	ZBTB49	0.038497	darkgrey	darkgrey
THAP9-AS1	ZKSCAN4	0.008319	darkgrey	darkgrey
THAP9-AS1	ZNF19	0.043603	darkgrey	darkgrey
THAP9-AS1	ZNF25	0.011125	darkgrey	darkgrey
THAP9-AS1	ZNF333	0.074193	darkgrey	darkgrey
THAP9-AS1	ZNF460.AS1	0.011591	darkgrey	NA
THAP9-AS1	ZNF599	0.004862	darkgrey	darkgrey
THAP9-AS1	ZRSR2	0.063935	darkgrey	darkgrey
THAP9-AS1	ZSCAN25	0.016008	darkgrey	darkgrey
THAP9-AS1	ZSCAN5A	0.025177	darkgrey	darkgrey
THAP9-AS1	ZSWIM3	0.011653	darkgrey	darkgrey

## Sheet: CHOL_tumor
gene1	gene2	correlation	module1	module2
THAP9-AS1	A3GALT2	NA	grey	grey
THAP9-AS1	AAMP	NA	grey	grey
THAP9-AS1	ABCA3	NA	grey	grey
THAP9-AS1	ABCB10P3	NA	grey	grey
THAP9-AS1	ABCC6P1	NA	grey	grey
THAP9-AS1	ABCF2	NA	grey	grey
THAP9-AS1	ABCF2P1	NA	grey	grey
THAP9-AS1	ABHD16B	NA	grey	grey
THAP9-AS1	ACACA	NA	grey	grey
THAP9-AS1	ACAD9	NA	grey	grey
THAP9-AS1	ACE3P	NA	grey	grey
THAP9-AS1	ACIN1	NA	grey	grey
THAP9-AS1	ACMSD	NA	grey	grey
THAP9-AS1	ACOD1	NA	grey	grey
THAP9-AS1	ACP1	NA	grey	grey
THAP9-AS1	ACTG1	NA	grey	grey
THAP9-AS1	ACTG1P14	NA	grey	grey
THAP9-AS1	ACTG1P19	NA	grey	grey
THAP9-AS1	ACTN1	NA	grey	grey
THAP9-AS1	ACTR3BP2	NA	grey	grey
THAP9-AS1	ACTR6P1	NA	grey	grey
THAP9-AS1	ACVR1	NA	grey	grey
THAP9-AS1	ACVR1C	NA	grey	grey
THAP9-AS1	ADAD1	NA	grey	grey
THAP9-AS1	ADAD1P2	NA	grey	grey
THAP9-AS1	ADAM21P1	NA	grey	grey
THAP9-AS1	ADAM24P	NA	grey	grey
THAP9-AS1	ADAM9	NA	grey	grey
THAP9-AS1	ADAMTSL2	NA	grey	grey
THAP9-AS1	ADGRA2	NA	grey	grey
THAP9-AS1	ADI1P3	NA	grey	grey
THAP9-AS1	ADORA2B	NA	grey	grey
THAP9-AS1	ADSL	NA	grey	grey
THAP9-AS1	AGAP1	NA	grey	grey
THAP9-AS1	AGAP1.IT1	NA	grey	NA
THAP9-AS1	AGBL2	NA	grey	grey
THAP9-AS1	AGFG2	NA	grey	grey
THAP9-AS1	AGGF1P6	NA	grey	grey
THAP9-AS1	AGGF1P7	NA	grey	grey
THAP9-AS1	AGKP2	NA	grey	grey
THAP9-AS1	AGPAT5P1	NA	grey	grey
THAP9-AS1	AHCY	NA	grey	grey
THAP9-AS1	AIFM2	NA	grey	grey
THAP9-AS1	AK1	NA	grey	grey
THAP9-AS1	AK3P4	NA	grey	grey
THAP9-AS1	AK4P5	NA	grey	grey
THAP9-AS1	AKAP8L	NA	grey	grey
THAP9-AS1	AKIP1	NA	grey	grey
THAP9-AS1	AKR1B10P2	NA	grey	grey
THAP9-AS1	AKT3	NA	grey	grey
THAP9-AS1	ALAS2	NA	grey	grey
THAP9-AS1	ALKAL2	NA	grey	grey
THAP9-AS1	AMFR	NA	grey	grey
THAP9-AS1	AMOTL2	NA	grey	grey
THAP9-AS1	AMY1C	NA	grey	grey
THAP9-AS1	AMY2B	NA	grey	grey
THAP9-AS1	AMYP1	NA	grey	grey
THAP9-AS1	AMZ2	NA	grey	grey
THAP9-AS1	ANAPC13	NA	grey	grey
THAP9-AS1	ANGPT2	NA	grey	grey
THAP9-AS1	ANGPTL5	NA	grey	grey
THAP9-AS1	ANKHD1.EIF4EBP3	NA	grey	NA
THAP9-AS1	ANKRD36BP1	NA	grey	grey
THAP9-AS1	ANKRD42	NA	grey	grey
THAP9-AS1	AP3S2	NA	grey	grey
THAP9-AS1	AP5Z1	NA	grey	grey
THAP9-AS1	APBA2	NA	grey	grey
THAP9-AS1	APEH	NA	grey	grey
THAP9-AS1	APLNR	NA	grey	grey
THAP9-AS1	APOOP2	NA	grey	grey
THAP9-AS1	APPL2	NA	grey	grey
THAP9-AS1	AQP7	NA	grey	grey
THAP9-AS1	ARAP2	NA	grey	grey
THAP9-AS1	ARF4	NA	grey	grey
THAP9-AS1	ARHGEF28	NA	grey	grey
THAP9-AS1	ARL2BP	NA	grey	grey
THAP9-AS1	ARL2BPP10	NA	grey	grey
THAP9-AS1	ARL2BPP5	NA	grey	grey
THAP9-AS1	ARNT2	NA	grey	grey
THAP9-AS1	ARNTL	NA	grey	grey
THAP9-AS1	ARSD.AS1	NA	grey	NA
THAP9-AS1	ARSI	NA	grey	grey
THAP9-AS1	ART2BP	NA	grey	grey
THAP9-AS1	ASB7	NA	grey	grey
THAP9-AS1	ASCC2	NA	grey	grey
THAP9-AS1	ASPRV1	NA	grey	grey
THAP9-AS1	ASS1P2	NA	grey	grey
THAP9-AS1	ATG13	NA	grey	grey
THAP9-AS1	ATG4C	NA	grey	grey
THAP9-AS1	ATG9B	NA	grey	grey
THAP9-AS1	ATIC	NA	grey	grey
THAP9-AS1	ATP5PBP2	NA	grey	grey
THAP9-AS1	ATP5PBP4	NA	grey	grey
THAP9-AS1	ATP6V0D1	NA	grey	grey
THAP9-AS1	ATP6V1E1	NA	grey	grey
THAP9-AS1	ATP6V1H	NA	grey	grey
THAP9-AS1	ATRAID	NA	grey	grey
THAP9-AS1	ATXN10	NA	grey	grey
THAP9-AS1	ATXN7L3P1	NA	grey	grey
THAP9-AS1	AZIN2	NA	grey	grey
THAP9-AS1	AZU1P1	NA	grey	grey
THAP9-AS1	B2M	NA	grey	grey
THAP9-AS1	B4GALNT2P1	NA	grey	grey
THAP9-AS1	B4GALT5	NA	grey	grey
THAP9-AS1	B4GALT7	NA	grey	grey
THAP9-AS1	B4GAT1	NA	grey	grey
THAP9-AS1	BAIAP2L2	NA	grey	grey
THAP9-AS1	BBS4	NA	grey	grey
THAP9-AS1	BCAR1	NA	grey	grey
THAP9-AS1	BCAR1P1	NA	grey	grey
THAP9-AS1	BCAR1P2	NA	grey	grey
THAP9-AS1	BCKDHA	NA	grey	grey
THAP9-AS1	BCL2L12	NA	grey	grey
THAP9-AS1	BCL2L12P1	NA	grey	grey
THAP9-AS1	BCL2L13	NA	grey	grey
THAP9-AS1	BDH1	NA	grey	grey
THAP9-AS1	BEST2	NA	grey	grey
THAP9-AS1	BEST4	NA	grey	grey
THAP9-AS1	BET1L	NA	grey	grey
THAP9-AS1	BGLT3	NA	grey	grey
THAP9-AS1	BGN	NA	grey	grey
THAP9-AS1	BIN1	NA	grey	grey
THAP9-AS1	BIRC2	NA	grey	grey
THAP9-AS1	BLCAP	NA	grey	grey
THAP9-AS1	BMI1P1	NA	grey	grey
THAP9-AS1	BMP15	NA	grey	grey
THAP9-AS1	BMP2KL	NA	grey	grey
THAP9-AS1	BNIP3P10	NA	grey	grey
THAP9-AS1	BNIP3P24	NA	grey	grey
THAP9-AS1	BNIP3P31	NA	grey	grey
THAP9-AS1	BNIP3P32	NA	grey	grey
THAP9-AS1	BNIP3P34	NA	grey	grey
THAP9-AS1	BNIP3P35	NA	grey	grey
THAP9-AS1	BPGM	NA	grey	grey
THAP9-AS1	BPIFA3	NA	grey	grey
THAP9-AS1	BPIFB3	NA	grey	grey
THAP9-AS1	BPY2	NA	grey	grey
THAP9-AS1	BPY2B	NA	grey	grey
THAP9-AS1	BPY2C	NA	grey	grey
THAP9-AS1	BRAFP1	NA	grey	grey
THAP9-AS1	BRD7P2	NA	grey	grey
THAP9-AS1	BRI3P2	NA	grey	grey
THAP9-AS1	BRK1P2	NA	grey	grey
THAP9-AS1	BRWD1.AS1	NA	grey	NA
THAP9-AS1	BSCL2	NA	grey	grey
THAP9-AS1	BSDC1	NA	grey	grey
THAP9-AS1	BSG	NA	grey	grey
THAP9-AS1	BSNDP1	NA	grey	grey
THAP9-AS1	BSNDP3	NA	grey	grey
THAP9-AS1	BSNDP4	NA	grey	grey
THAP9-AS1	BTF3	NA	grey	grey
THAP9-AS1	BTF3P6	NA	grey	grey
THAP9-AS1	BTN3A1	NA	grey	grey
THAP9-AS1	BTN3A2	NA	grey	grey
THAP9-AS1	BUD31P1	NA	grey	grey
THAP9-AS1	C10orf90	NA	grey	grey
THAP9-AS1	C11orf24	NA	grey	grey
THAP9-AS1	C11orf40	NA	grey	grey
THAP9-AS1	C11orf98P1	NA	grey	grey
THAP9-AS1	C12orf73	NA	grey	grey
THAP9-AS1	C14orf177	NA	grey	grey
THAP9-AS1	C14orf93	NA	grey	grey
THAP9-AS1	C16orf71	NA	grey	grey
THAP9-AS1	C16orf92	NA	grey	grey
THAP9-AS1	C17orf75	NA	grey	grey
THAP9-AS1	C18orf12	NA	grey	grey
THAP9-AS1	C19orf44	NA	grey	grey
THAP9-AS1	C19orf47	NA	grey	grey
THAP9-AS1	C1orf167.AS1	NA	grey	NA
THAP9-AS1	C1QL1P1	NA	grey	grey
THAP9-AS1	C1QTNF5	NA	grey	grey
THAP9-AS1	C1QTNF7.AS1	NA	grey	NA
THAP9-AS1	C20orf203	NA	grey	grey
THAP9-AS1	C22orf23	NA	grey	grey
THAP9-AS1	C22orf31	NA	grey	grey
THAP9-AS1	C2CD2	NA	grey	grey
THAP9-AS1	C2CD3	NA	grey	grey
THAP9-AS1	C2orf69P4	NA	grey	grey
THAP9-AS1	C2orf72	NA	grey	grey
THAP9-AS1	C3orf80	NA	grey	grey
THAP9-AS1	C6orf99	NA	grey	grey
THAP9-AS1	C9orf62	NA	grey	grey
THAP9-AS1	CACNA1C.IT2	NA	grey	NA
THAP9-AS1	CADM2.AS2	NA	grey	NA
THAP9-AS1	CALCOCO1	NA	grey	grey
THAP9-AS1	CALM2P4	NA	grey	grey
THAP9-AS1	CAMK1	NA	grey	grey
THAP9-AS1	CAMK2N1	NA	grey	grey
THAP9-AS1	CAPN1	NA	grey	grey
THAP9-AS1	CAPN15	NA	grey	grey
THAP9-AS1	CAPZA1P3	NA	grey	grey
THAP9-AS1	CARS1	NA	grey	grey
THAP9-AS1	CARS2	NA	grey	grey
THAP9-AS1	CASC23	NA	grey	grey
THAP9-AS1	CASP10	NA	grey	grey
THAP9-AS1	CASP3P1	NA	grey	grey
THAP9-AS1	CASP4	NA	grey	grey
THAP9-AS1	CAV2	NA	grey	grey
THAP9-AS1	CAVIN1	NA	grey	grey
THAP9-AS1	CBLC	NA	grey	grey
THAP9-AS1	CBWD1	NA	grey	grey
THAP9-AS1	CBX3P8	NA	grey	grey
THAP9-AS1	CC2D2A	NA	grey	grey
THAP9-AS1	CCDC105	NA	grey	grey
THAP9-AS1	CCDC113	NA	grey	grey
THAP9-AS1	CCDC11P1	NA	grey	grey
THAP9-AS1	CCDC138	NA	grey	grey
THAP9-AS1	CCDC140	NA	grey	grey
THAP9-AS1	CCDC160	NA	grey	grey
THAP9-AS1	CCDC34	NA	grey	grey
THAP9-AS1	CCDC34P1	NA	grey	grey
THAP9-AS1	CCDC58	NA	grey	grey
THAP9-AS1	CCDC66	NA	grey	grey
THAP9-AS1	CCDC90B	NA	grey	grey
THAP9-AS1	CCDC9B	NA	grey	grey
THAP9-AS1	CCER1	NA	grey	grey
THAP9-AS1	CCL27	NA	grey	grey
THAP9-AS1	CCND3P2	NA	grey	grey
THAP9-AS1	CCNHP1	NA	grey	grey
THAP9-AS1	CCPG1	NA	grey	grey
THAP9-AS1	CCT3P1	NA	grey	grey
THAP9-AS1	CCT5P2	NA	grey	grey
THAP9-AS1	CCT6A	NA	grey	grey
THAP9-AS1	CCT7	NA	grey	grey
THAP9-AS1	CCT8L2	NA	grey	grey
THAP9-AS1	CD151	NA	grey	grey
THAP9-AS1	CD59	NA	grey	grey
THAP9-AS1	CDC42P1	NA	grey	grey
THAP9-AS1	CDCA7L	NA	grey	grey
THAP9-AS1	CDH12P2	NA	grey	grey
THAP9-AS1	CDH18.AS1	NA	grey	NA
THAP9-AS1	CDH23.AS1	NA	grey	NA
THAP9-AS1	CDK5P1	NA	grey	grey
THAP9-AS1	CDR2L	NA	grey	grey
THAP9-AS1	CDRT15L2	NA	grey	grey
THAP9-AS1	CDX4	NA	grey	grey
THAP9-AS1	CDY1	NA	grey	grey
THAP9-AS1	CDY12P	NA	grey	grey
THAP9-AS1	CDY13P	NA	grey	grey
THAP9-AS1	CDY14P	NA	grey	grey
THAP9-AS1	CDY1B	NA	grey	grey
THAP9-AS1	CDY23P	NA	grey	grey
THAP9-AS1	CDY2B	NA	grey	grey
THAP9-AS1	CDY3P	NA	grey	grey
THAP9-AS1	CEBPZ	NA	grey	grey
THAP9-AS1	CELF2.AS2	NA	grey	NA
THAP9-AS1	CEMP1	NA	grey	grey
THAP9-AS1	CENPVL1	NA	grey	grey
THAP9-AS1	CEP112	NA	grey	grey
THAP9-AS1	CEP95	NA	grey	grey
THAP9-AS1	CETN1	NA	grey	grey
THAP9-AS1	CFAP126	NA	grey	grey
THAP9-AS1	CFB	NA	grey	grey
THAP9-AS1	CFC1B	NA	grey	grey
THAP9-AS1	CFL2	NA	grey	grey
THAP9-AS1	CHCHD2P5	NA	grey	grey
THAP9-AS1	CHEK2	NA	grey	grey
THAP9-AS1	CHMP1AP1	NA	grey	grey
THAP9-AS1	CHST14	NA	grey	grey
THAP9-AS1	CHST9	NA	grey	grey
THAP9-AS1	CIBAR1	NA	grey	grey
THAP9-AS1	CINP	NA	grey	grey
THAP9-AS1	CIR1P3	NA	grey	grey
THAP9-AS1	CISD2	NA	grey	grey
THAP9-AS1	CLDN10	NA	grey	grey
THAP9-AS1	CLDN22	NA	grey	grey
THAP9-AS1	CLIP2	NA	grey	grey
THAP9-AS1	CLK1	NA	grey	grey
THAP9-AS1	CLP1	NA	grey	grey
THAP9-AS1	CLPTM1LP1	NA	grey	grey
THAP9-AS1	CLRN3	NA	grey	grey
THAP9-AS1	CLYBL	NA	grey	grey
THAP9-AS1	CMC4	NA	grey	grey
THAP9-AS1	CMTR1	NA	grey	grey
THAP9-AS1	CNBD1	NA	grey	grey
THAP9-AS1	CNN2P10	NA	grey	grey
THAP9-AS1	CNNM3	NA	grey	grey
THAP9-AS1	CNTNAP2	NA	grey	grey
THAP9-AS1	COL11A2P1	NA	grey	grey
THAP9-AS1	COL4A2	NA	grey	grey
THAP9-AS1	COL4A2.AS2	NA	grey	NA
THAP9-AS1	COPS2	NA	grey	grey
THAP9-AS1	COPS8	NA	grey	grey
THAP9-AS1	COPS8P3	NA	grey	grey
THAP9-AS1	CORO1B	NA	grey	grey
THAP9-AS1	COX11	NA	grey	grey
THAP9-AS1	COX5BP2	NA	grey	grey
THAP9-AS1	COX6B1P7	NA	grey	grey
THAP9-AS1	COX6CP15	NA	grey	grey
THAP9-AS1	COX6CP5	NA	grey	grey
THAP9-AS1	COX6CP7	NA	grey	grey
THAP9-AS1	COX6CP8	NA	grey	grey
THAP9-AS1	COX7A2L	NA	grey	grey
THAP9-AS1	COX8C	NA	grey	grey
THAP9-AS1	CPLX3	NA	grey	grey
THAP9-AS1	CPM	NA	grey	grey
THAP9-AS1	CPPED1	NA	grey	grey
THAP9-AS1	CPSF1P2	NA	grey	grey
THAP9-AS1	CPSF3	NA	grey	grey
THAP9-AS1	CRB1	NA	grey	grey
THAP9-AS1	CRB3P1	NA	grey	grey
THAP9-AS1	CRLS1	NA	grey	grey
THAP9-AS1	CROCCP2	NA	grey	grey
THAP9-AS1	CRYBA1	NA	grey	grey
THAP9-AS1	CRYGA	NA	grey	grey
THAP9-AS1	CRYGGP	NA	grey	grey
THAP9-AS1	CSN1S2AP	NA	grey	grey
THAP9-AS1	CSN2	NA	grey	grey
THAP9-AS1	CSPG4P1Y	NA	grey	grey
THAP9-AS1	CSPG4P2Y	NA	grey	grey
THAP9-AS1	CST12P	NA	grey	grey
THAP9-AS1	CSTF1	NA	grey	grey
THAP9-AS1	CT45A1	NA	grey	grey
THAP9-AS1	CT45A11P	NA	grey	grey
THAP9-AS1	CT45A2	NA	grey	grey
THAP9-AS1	CT45A3	NA	grey	grey
THAP9-AS1	CT45A5	NA	grey	grey
THAP9-AS1	CT45A6	NA	grey	grey
THAP9-AS1	CT45A7	NA	grey	grey
THAP9-AS1	CT45A8	NA	grey	grey
THAP9-AS1	CT45A9	NA	grey	grey
THAP9-AS1	CT47A1	NA	grey	grey
THAP9-AS1	CT47A10	NA	grey	grey
THAP9-AS1	CT47A11	NA	grey	grey
THAP9-AS1	CT47A12	NA	grey	grey
THAP9-AS1	CT47A2	NA	grey	grey
THAP9-AS1	CT47A3	NA	grey	grey
THAP9-AS1	CT47A4	NA	grey	grey
THAP9-AS1	CT47A5	NA	grey	grey
THAP9-AS1	CT47A7	NA	grey	grey
THAP9-AS1	CT47A8	NA	grey	grey
THAP9-AS1	CT47A9	NA	grey	grey
THAP9-AS1	CTAG1B	NA	grey	grey
THAP9-AS1	CTAGE15	NA	grey	grey
THAP9-AS1	CTNS	NA	grey	grey
THAP9-AS1	CTSC	NA	grey	grey
THAP9-AS1	CTSD	NA	grey	grey
THAP9-AS1	CUBNP1	NA	grey	grey
THAP9-AS1	CWF19L1	NA	grey	grey
THAP9-AS1	CXorf38	NA	grey	grey
THAP9-AS1	CXorf49	NA	grey	grey
THAP9-AS1	CXorf49B	NA	grey	grey
THAP9-AS1	CXorf51A	NA	grey	grey
THAP9-AS1	CXorf51B	NA	grey	grey
THAP9-AS1	CYCSP42	NA	grey	grey
THAP9-AS1	CYCSP53	NA	grey	grey
THAP9-AS1	CYFIP2	NA	grey	grey
THAP9-AS1	CYLC1	NA	grey	grey
THAP9-AS1	CYP11B2	NA	grey	grey
THAP9-AS1	CYP2C56P	NA	grey	grey
THAP9-AS1	CYP2C61P	NA	grey	grey
THAP9-AS1	CYP3A54P	NA	grey	grey
THAP9-AS1	CYP4A43P	NA	grey	grey
THAP9-AS1	CYP4A44P	NA	grey	grey
THAP9-AS1	CYP4F44P	NA	grey	grey
THAP9-AS1	D21S2088E	NA	grey	grey
THAP9-AS1	DAGLA	NA	grey	grey
THAP9-AS1	DAP	NA	grey	grey
THAP9-AS1	DAXX	NA	grey	grey
THAP9-AS1	DAZ3	NA	grey	grey
THAP9-AS1	DAZ4	NA	grey	grey
THAP9-AS1	DDHD1	NA	grey	grey
THAP9-AS1	DDN	NA	grey	grey
THAP9-AS1	DDX10	NA	grey	grey
THAP9-AS1	DDX18P2	NA	grey	grey
THAP9-AS1	DDX23	NA	grey	grey
THAP9-AS1	DDX41	NA	grey	grey
THAP9-AS1	DDX51	NA	grey	grey
THAP9-AS1	DEFA1	NA	grey	grey
THAP9-AS1	DEFA1B	NA	grey	grey
THAP9-AS1	DEFB103B	NA	grey	grey
THAP9-AS1	DEFB104A	NA	grey	grey
THAP9-AS1	DEFB104B	NA	grey	grey
THAP9-AS1	DEFB105A	NA	grey	grey
THAP9-AS1	DEFB106A	NA	grey	grey
THAP9-AS1	DEFB106B	NA	grey	grey
THAP9-AS1	DEFB107A	NA	grey	grey
THAP9-AS1	DEFB108F	NA	grey	grey
THAP9-AS1	DEFB109C	NA	grey	grey
THAP9-AS1	DEFB110	NA	grey	grey
THAP9-AS1	DEFB112	NA	grey	grey
THAP9-AS1	DEFB113	NA	grey	grey
THAP9-AS1	DEFB114	NA	grey	grey
THAP9-AS1	DEFB119	NA	grey	grey
THAP9-AS1	DEFB121	NA	grey	grey
THAP9-AS1	DEFB123	NA	grey	grey
THAP9-AS1	DEFB125	NA	grey	grey
THAP9-AS1	DEFB127	NA	grey	grey
THAP9-AS1	DEFB130A	NA	grey	grey
THAP9-AS1	DEFB130B	NA	grey	grey
THAP9-AS1	DEFB130D	NA	grey	grey
THAP9-AS1	DEFB131A	NA	grey	grey
THAP9-AS1	DEFB131C	NA	grey	grey
THAP9-AS1	DEFB135	NA	grey	grey
THAP9-AS1	DEFB4A	NA	grey	grey
THAP9-AS1	DEFT1P	NA	grey	grey
THAP9-AS1	DEFT1P2	NA	grey	grey
THAP9-AS1	DENND6B	NA	grey	grey
THAP9-AS1	DEPDC5	NA	grey	grey
THAP9-AS1	DERL2	NA	grey	grey
THAP9-AS1	DESI1	NA	grey	grey
THAP9-AS1	DGLUCY	NA	grey	grey
THAP9-AS1	DHRS1	NA	grey	grey
THAP9-AS1	DIAPH1	NA	grey	grey
THAP9-AS1	DIAPH3.AS1	NA	grey	NA
THAP9-AS1	DIMT1P1	NA	grey	grey
THAP9-AS1	DKFZP434A062	NA	grey	grey
THAP9-AS1	DLGAP2.AS1	NA	grey	NA
THAP9-AS1	DLGAP5P1	NA	grey	grey
THAP9-AS1	DLX2.DT	NA	grey	NA
THAP9-AS1	DMRTA1	NA	grey	grey
THAP9-AS1	DNAJA1P4	NA	grey	grey
THAP9-AS1	DNAJA3	NA	grey	grey
THAP9-AS1	DNAJC19P4	NA	grey	grey
THAP9-AS1	DNASE2	NA	grey	grey
THAP9-AS1	DND1	NA	grey	grey
THAP9-AS1	DNM1P29	NA	grey	grey
THAP9-AS1	DNM1P49	NA	grey	grey
THAP9-AS1	DNMT1	NA	grey	grey
THAP9-AS1	DNPEP	NA	grey	grey
THAP9-AS1	DONSON	NA	grey	grey
THAP9-AS1	DPH5	NA	grey	grey
THAP9-AS1	DPP10.AS3	NA	grey	NA
THAP9-AS1	DPPA3P3	NA	grey	grey
THAP9-AS1	DPYSL2	NA	grey	grey
THAP9-AS1	DRG1	NA	grey	grey
THAP9-AS1	DSCR9	NA	grey	grey
THAP9-AS1	DSTN	NA	grey	grey
THAP9-AS1	DSTNP2	NA	grey	grey
THAP9-AS1	DTX3L	NA	grey	grey
THAP9-AS1	DUSP12P1	NA	grey	grey
THAP9-AS1	DUSP16	NA	grey	grey
THAP9-AS1	DUSP23	NA	grey	grey
THAP9-AS1	DUT	NA	grey	grey
THAP9-AS1	DUTP3	NA	grey	grey
THAP9-AS1	DUX4L1	NA	grey	grey
THAP9-AS1	DUX4L10	NA	grey	grey
THAP9-AS1	DUX4L11	NA	grey	grey
THAP9-AS1	DUX4L12	NA	grey	grey
THAP9-AS1	DUX4L13	NA	grey	grey
THAP9-AS1	DUX4L14	NA	grey	grey
THAP9-AS1	DUX4L15	NA	grey	grey
THAP9-AS1	DUX4L18	NA	grey	grey
THAP9-AS1	DUX4L2	NA	grey	grey
THAP9-AS1	DUX4L20	NA	grey	grey
THAP9-AS1	DUX4L21	NA	grey	grey
THAP9-AS1	DUX4L22	NA	grey	grey
THAP9-AS1	DUX4L23	NA	grey	grey
THAP9-AS1	DUX4L24	NA	grey	grey
THAP9-AS1	DUX4L25	NA	grey	grey
THAP9-AS1	DUX4L28	NA	grey	grey
THAP9-AS1	DUX4L29	NA	grey	grey
THAP9-AS1	DUX4L3	NA	grey	grey
THAP9-AS1	DUX4L31	NA	grey	grey
THAP9-AS1	DUX4L4	NA	grey	grey
THAP9-AS1	DUX4L45	NA	grey	grey
THAP9-AS1	DUX4L47	NA	grey	grey
THAP9-AS1	DUX4L5	NA	grey	grey
THAP9-AS1	DUX4L6	NA	grey	grey
THAP9-AS1	DUX4L7	NA	grey	grey
THAP9-AS1	DUX4L8	NA	grey	grey
THAP9-AS1	DUXAP11	NA	grey	grey
THAP9-AS1	DYNC2LI1	NA	grey	grey
THAP9-AS1	EBF3	NA	grey	grey
THAP9-AS1	EBNA1BP2	NA	grey	grey
THAP9-AS1	ECM1P2	NA	grey	grey
THAP9-AS1	EDC3	NA	grey	grey
THAP9-AS1	EEDP1	NA	grey	grey
THAP9-AS1	EEF1A1P21	NA	grey	grey
THAP9-AS1	EEF1A1P22	NA	grey	grey
THAP9-AS1	EEF1B2P1	NA	grey	grey
THAP9-AS1	EEF1B2P7	NA	grey	grey
THAP9-AS1	EEF1DP2	NA	grey	grey
THAP9-AS1	EEF1E1	NA	grey	grey
THAP9-AS1	EEF1GP6	NA	grey	grey
THAP9-AS1	EI24	NA	grey	grey
THAP9-AS1	EIF1	NA	grey	grey
THAP9-AS1	EIF2AP2	NA	grey	grey
THAP9-AS1	EIF3FP2	NA	grey	grey
THAP9-AS1	EIF3J	NA	grey	grey
THAP9-AS1	EIF3KP2	NA	grey	grey
THAP9-AS1	EIF5AL1	NA	grey	grey
THAP9-AS1	ELAVL1	NA	grey	grey
THAP9-AS1	ELAVL2	NA	grey	grey
THAP9-AS1	ELK1P1	NA	grey	grey
THAP9-AS1	ELL2P2	NA	grey	grey
THAP9-AS1	ELL2P3	NA	grey	grey
THAP9-AS1	ELOA3CP	NA	grey	grey
THAP9-AS1	ELOAP1	NA	grey	grey
THAP9-AS1	ELOBP3	NA	grey	grey
THAP9-AS1	ELOCP10	NA	grey	grey
THAP9-AS1	ELOCP11	NA	grey	grey
THAP9-AS1	ELOCP12	NA	grey	grey
THAP9-AS1	ELOCP13	NA	grey	grey
THAP9-AS1	ELOCP15	NA	grey	grey
THAP9-AS1	ELOCP16	NA	grey	grey
THAP9-AS1	ELOCP17	NA	grey	grey
THAP9-AS1	ELOCP18	NA	grey	grey
THAP9-AS1	ELOCP23	NA	grey	grey
THAP9-AS1	ELOCP34	NA	grey	grey
THAP9-AS1	ELOCP35	NA	grey	grey
THAP9-AS1	ELOCP4	NA	grey	grey
THAP9-AS1	ELOCP6	NA	grey	grey
THAP9-AS1	ELOCP7	NA	grey	grey
THAP9-AS1	ELOCP8	NA	grey	grey
THAP9-AS1	ELOVL2.AS1	NA	grey	NA
THAP9-AS1	ELOVL7	NA	grey	grey
THAP9-AS1	ELP3	NA	grey	grey
THAP9-AS1	EMC9	NA	grey	grey
THAP9-AS1	EME2	NA	grey	grey
THAP9-AS1	ENO1P1	NA	grey	grey
THAP9-AS1	ENPP5	NA	grey	grey
THAP9-AS1	ENSAP1	NA	grey	grey
THAP9-AS1	EPB41L1	NA	grey	grey
THAP9-AS1	EPB41L4A	NA	grey	grey
THAP9-AS1	EPCAM	NA	grey	grey
THAP9-AS1	EPS15L1	NA	grey	grey
THAP9-AS1	EPX	NA	grey	grey
THAP9-AS1	ERBB2	NA	grey	grey
THAP9-AS1	ERICH6	NA	grey	grey
THAP9-AS1	ESYT3	NA	grey	grey
THAP9-AS1	ETAA1	NA	grey	grey
THAP9-AS1	EVC2	NA	grey	grey
THAP9-AS1	EXO5	NA	grey	grey
THAP9-AS1	EXOSC6	NA	grey	grey
THAP9-AS1	EXOSC7	NA	grey	grey
THAP9-AS1	EZR.AS1	NA	grey	NA
THAP9-AS1	FAAP24	NA	grey	grey
THAP9-AS1	FABP12P1	NA	grey	grey
THAP9-AS1	FABP5P13	NA	grey	grey
THAP9-AS1	FABP5P5	NA	grey	grey
THAP9-AS1	FAM122C	NA	grey	grey
THAP9-AS1	FAM131C	NA	grey	grey
THAP9-AS1	FAM138A	NA	grey	grey
THAP9-AS1	FAM138E	NA	grey	grey
THAP9-AS1	FAM160A2	NA	grey	grey
THAP9-AS1	FAM174A	NA	grey	grey
THAP9-AS1	FAM187A	NA	grey	grey
THAP9-AS1	FAM187B	NA	grey	grey
THAP9-AS1	FAM197Y5	NA	grey	grey
THAP9-AS1	FAM223A	NA	grey	grey
THAP9-AS1	FAM230A	NA	grey	grey
THAP9-AS1	FAM230E	NA	grey	grey
THAP9-AS1	FAM230J	NA	grey	grey
THAP9-AS1	FAM236A	NA	grey	grey
THAP9-AS1	FAM236B	NA	grey	grey
THAP9-AS1	FAM236D	NA	grey	grey
THAP9-AS1	FAM243A	NA	grey	grey
THAP9-AS1	FAM243B	NA	grey	grey
THAP9-AS1	FAM27E3	NA	grey	grey
THAP9-AS1	FAM27E5	NA	grey	grey
THAP9-AS1	FAM47B	NA	grey	grey
THAP9-AS1	FAM71BP1	NA	grey	grey
THAP9-AS1	FAM71C	NA	grey	grey
THAP9-AS1	FAM86C1P	NA	grey	grey
THAP9-AS1	FAM86DP	NA	grey	grey
THAP9-AS1	FAM86JP	NA	grey	grey
THAP9-AS1	FAM90A1	NA	grey	grey
THAP9-AS1	FAM96AP1	NA	grey	grey
THAP9-AS1	FASTKD1	NA	grey	grey
THAP9-AS1	FAXC	NA	grey	grey
THAP9-AS1	FBLN7	NA	grey	grey
THAP9-AS1	FBXL13	NA	grey	grey
THAP9-AS1	FBXO17	NA	grey	grey
THAP9-AS1	FBXO31	NA	grey	grey
THAP9-AS1	FCF1P4	NA	grey	grey
THAP9-AS1	FCF1P9	NA	grey	grey
THAP9-AS1	FDPSP6	NA	grey	grey
THAP9-AS1	FEM1A	NA	grey	grey
THAP9-AS1	FEM1AP3	NA	grey	grey
THAP9-AS1	FERD3L	NA	grey	grey
THAP9-AS1	FGFBP2	NA	grey	grey
THAP9-AS1	FGFR3P2	NA	grey	grey
THAP9-AS1	FGFR3P3	NA	grey	grey
THAP9-AS1	FIBP	NA	grey	grey
THAP9-AS1	FKBP11	NA	grey	grey
THAP9-AS1	FKBP4	NA	grey	grey
THAP9-AS1	FKBP4P8	NA	grey	grey
THAP9-AS1	FLJ33534	NA	grey	grey
THAP9-AS1	FMC1	NA	grey	grey
THAP9-AS1	FMO1	NA	grey	grey
THAP9-AS1	FMO11P	NA	grey	grey
THAP9-AS1	FMO4	NA	grey	grey
THAP9-AS1	FNBP4	NA	grey	grey
THAP9-AS1	FNDC4	NA	grey	grey
THAP9-AS1	FOXA2	NA	grey	grey
THAP9-AS1	FOXB2	NA	grey	grey
THAP9-AS1	FOXD2	NA	grey	grey
THAP9-AS1	FOXO1B	NA	grey	grey
THAP9-AS1	FRG2MP	NA	grey	grey
THAP9-AS1	FRMPD3.AS1	NA	grey	NA
THAP9-AS1	FSHB	NA	grey	grey
THAP9-AS1	FTH1P9	NA	grey	grey
THAP9-AS1	FTLP18	NA	grey	grey
THAP9-AS1	FTLP9	NA	grey	grey
THAP9-AS1	FTSJ3	NA	grey	grey
THAP9-AS1	FXYD6.FXYD2	NA	grey	NA
THAP9-AS1	GAA	NA	grey	grey
THAP9-AS1	GAB2	NA	grey	grey
THAP9-AS1	GAB4	NA	grey	grey
THAP9-AS1	GABBR1	NA	grey	grey
THAP9-AS1	GABRE	NA	grey	grey
THAP9-AS1	GAGE10	NA	grey	grey
THAP9-AS1	GAGE12B	NA	grey	grey
THAP9-AS1	GAGE12C	NA	grey	grey
THAP9-AS1	GAGE12D	NA	grey	grey
THAP9-AS1	GAGE12E	NA	grey	grey
THAP9-AS1	GAGE12H	NA	grey	grey
THAP9-AS1	GAGE13	NA	grey	grey
THAP9-AS1	GAGE2B	NA	grey	grey
THAP9-AS1	GAGE2C	NA	grey	grey
THAP9-AS1	GAGE2E	NA	grey	grey
THAP9-AS1	GAGE4	NA	grey	grey
THAP9-AS1	GAPDH	NA	grey	grey
THAP9-AS1	GAPDHP34	NA	grey	grey
THAP9-AS1	GAPDHP41	NA	grey	grey
THAP9-AS1	GAPDHP46	NA	grey	grey
THAP9-AS1	GAPDHP50	NA	grey	grey
THAP9-AS1	GAPDHP52	NA	grey	grey
THAP9-AS1	GAPDHP53	NA	grey	grey
THAP9-AS1	GAPDHP56	NA	grey	grey
THAP9-AS1	GARS1	NA	grey	grey
THAP9-AS1	GATAD2A	NA	grey	grey
THAP9-AS1	GATB	NA	grey	grey
THAP9-AS1	GDF1	NA	grey	grey
THAP9-AS1	GEMIN8P3	NA	grey	grey
THAP9-AS1	GFPT1	NA	grey	grey
THAP9-AS1	GGCT	NA	grey	grey
THAP9-AS1	GGNBP2	NA	grey	grey
THAP9-AS1	GLA	NA	grey	grey
THAP9-AS1	GLB1	NA	grey	grey
THAP9-AS1	GLIDR	NA	grey	grey
THAP9-AS1	GLIS2	NA	grey	grey
THAP9-AS1	GLOD5	NA	grey	grey
THAP9-AS1	GLRX3	NA	grey	grey
THAP9-AS1	GLRX3P1	NA	grey	grey
THAP9-AS1	GLULP2	NA	grey	grey
THAP9-AS1	GLYCAM1	NA	grey	grey
THAP9-AS1	GMDS	NA	grey	grey
THAP9-AS1	GNAT2	NA	grey	grey
THAP9-AS1	GNL1	NA	grey	grey
THAP9-AS1	GNRHR	NA	grey	grey
THAP9-AS1	GOLGA6L1	NA	grey	grey
THAP9-AS1	GOT2P1	NA	grey	grey
THAP9-AS1	GOT2P3	NA	grey	grey
THAP9-AS1	GOT2P5	NA	grey	grey
THAP9-AS1	GP1BB	NA	grey	grey
THAP9-AS1	GPN1	NA	grey	grey
THAP9-AS1	GPN3	NA	grey	grey
THAP9-AS1	GPR137B	NA	grey	grey
THAP9-AS1	GPR139	NA	grey	grey
THAP9-AS1	GPR32	NA	grey	grey
THAP9-AS1	GPR35	NA	grey	grey
THAP9-AS1	GPR37	NA	grey	grey
THAP9-AS1	GPRASP1	NA	grey	grey
THAP9-AS1	GPX6	NA	grey	grey
THAP9-AS1	GRAMD4P1	NA	grey	grey
THAP9-AS1	GRAMD4P5	NA	grey	grey
THAP9-AS1	GRB2	NA	grey	grey
THAP9-AS1	GRHPR	NA	grey	grey
THAP9-AS1	GRK1	NA	grey	grey
THAP9-AS1	GRN	NA	grey	grey
THAP9-AS1	GS1.204I12.4	NA	grey	NA
THAP9-AS1	GS1.278J22.2	NA	grey	NA
THAP9-AS1	GSS	NA	grey	grey
THAP9-AS1	GSTK1	NA	grey	grey
THAP9-AS1	GSTM2	NA	grey	grey
THAP9-AS1	GSTM3P1	NA	grey	grey
THAP9-AS1	GSTO3P	NA	grey	grey
THAP9-AS1	GSX1	NA	grey	grey
THAP9-AS1	GTDC1	NA	grey	grey
THAP9-AS1	GTF2IP22	NA	grey	grey
THAP9-AS1	GTF2IP3	NA	grey	grey
THAP9-AS1	GTPBP3	NA	grey	grey
THAP9-AS1	GUCA1ANB	NA	grey	grey
THAP9-AS1	GUF1	NA	grey	grey
THAP9-AS1	H1.10	NA	grey	NA
THAP9-AS1	H19	NA	grey	grey
THAP9-AS1	H2AB2	NA	grey	grey
THAP9-AS1	H2AB3	NA	grey	grey
THAP9-AS1	H2AC15	NA	grey	grey
THAP9-AS1	H2ACP1	NA	grey	grey
THAP9-AS1	H2AZP7	NA	grey	grey
THAP9-AS1	H2BC18	NA	grey	grey
THAP9-AS1	H2BC5	NA	grey	grey
THAP9-AS1	H2BC6	NA	grey	grey
THAP9-AS1	H2BP5	NA	grey	grey
THAP9-AS1	H2BP7	NA	grey	grey
THAP9-AS1	H2BP8	NA	grey	grey
THAP9-AS1	H3P19	NA	grey	grey
THAP9-AS1	H3P20	NA	grey	grey
THAP9-AS1	H3P30	NA	grey	grey
THAP9-AS1	H3P34	NA	grey	grey
THAP9-AS1	H3P46	NA	grey	grey
THAP9-AS1	HADH	NA	grey	grey
THAP9-AS1	HAGH	NA	grey	grey
THAP9-AS1	HAUS4	NA	grey	grey
THAP9-AS1	HAUS8P1	NA	grey	grey
THAP9-AS1	HAVCR1P2	NA	grey	grey
THAP9-AS1	HBAP1	NA	grey	grey
THAP9-AS1	HBG1	NA	grey	grey
THAP9-AS1	HCP5	NA	grey	grey
THAP9-AS1	HDAC7	NA	grey	grey
THAP9-AS1	HEMK1	NA	grey	grey
THAP9-AS1	HEPN1	NA	grey	grey
THAP9-AS1	HERC6	NA	grey	grey
THAP9-AS1	HES3	NA	grey	grey
THAP9-AS1	HEXIM1	NA	grey	grey
THAP9-AS1	HEY2	NA	grey	grey
THAP9-AS1	HEYL	NA	grey	grey
THAP9-AS1	HIGD1AP13	NA	grey	grey
THAP9-AS1	HINT1	NA	grey	grey
THAP9-AS1	HIPK4	NA	grey	grey
THAP9-AS1	HLA.A	NA	grey	NA
THAP9-AS1	HLA.C	NA	grey	NA
THAP9-AS1	HLA.G	NA	grey	NA
THAP9-AS1	HLTF.AS1	NA	grey	NA
THAP9-AS1	HMBOX1	NA	grey	grey
THAP9-AS1	HMCES	NA	grey	grey
THAP9-AS1	HMGB1P12	NA	grey	grey
THAP9-AS1	HMGB1P30	NA	grey	grey
THAP9-AS1	HMGB1P46	NA	grey	grey
THAP9-AS1	HMGB3	NA	grey	grey
THAP9-AS1	HMGB3P15	NA	grey	grey
THAP9-AS1	HMGB3P16	NA	grey	grey
THAP9-AS1	HMGB3P18	NA	grey	grey
THAP9-AS1	HMGB3P25	NA	grey	grey
THAP9-AS1	HMGB3P26	NA	grey	grey
THAP9-AS1	HMGB3P28	NA	grey	grey
THAP9-AS1	HMGB3P30	NA	grey	grey
THAP9-AS1	HMGN1P23	NA	grey	grey
THAP9-AS1	HMGN1P31	NA	grey	grey
THAP9-AS1	HMGN1P6	NA	grey	grey
THAP9-AS1	HNRNPA1	NA	grey	grey
THAP9-AS1	HNRNPA1P42	NA	grey	grey
THAP9-AS1	HNRNPCL4	NA	grey	grey
THAP9-AS1	HNRNPDL	NA	grey	grey
THAP9-AS1	HNRNPDLP3	NA	grey	grey
THAP9-AS1	HNRNPDP2	NA	grey	grey
THAP9-AS1	HNRNPH3P1	NA	grey	grey
THAP9-AS1	HNRNPM	NA	grey	grey
THAP9-AS1	HNRNPMP2	NA	grey	grey
THAP9-AS1	HNRNPRP2	NA	grey	grey
THAP9-AS1	HNRNPUL2	NA	grey	grey
THAP9-AS1	HOMER2	NA	grey	grey
THAP9-AS1	HPRT1P3	NA	grey	grey
THAP9-AS1	HSFY1	NA	grey	grey
THAP9-AS1	HSFY5P	NA	grey	grey
THAP9-AS1	HSFY7P	NA	grey	grey
THAP9-AS1	HSFY8P	NA	grey	grey
THAP9-AS1	HSPA12A	NA	grey	grey
THAP9-AS1	HSPA8P13	NA	grey	grey
THAP9-AS1	HSPA8P17	NA	grey	grey
THAP9-AS1	HSPA8P7	NA	grey	grey
THAP9-AS1	HSPD1	NA	grey	grey
THAP9-AS1	HSPE1	NA	grey	grey
THAP9-AS1	HSPE1P1	NA	grey	grey
THAP9-AS1	HSPE1P19	NA	grey	grey
THAP9-AS1	HSPE1P24	NA	grey	grey
THAP9-AS1	HTATIP2	NA	grey	grey
THAP9-AS1	HTRA1	NA	grey	grey
THAP9-AS1	HYKK	NA	grey	grey
THAP9-AS1	HYLS1	NA	grey	grey
THAP9-AS1	ICAM4	NA	grey	grey
THAP9-AS1	ICMT	NA	grey	grey
THAP9-AS1	IDH3A	NA	grey	grey
THAP9-AS1	IER5L	NA	grey	grey
THAP9-AS1	IFI27L1	NA	grey	grey
THAP9-AS1	IFI44	NA	grey	grey
THAP9-AS1	IFI44L	NA	grey	grey
THAP9-AS1	IFNA10	NA	grey	grey
THAP9-AS1	IFNA13	NA	grey	grey
THAP9-AS1	IFNA16	NA	grey	grey
THAP9-AS1	IFNA4	NA	grey	grey
THAP9-AS1	IFNA7	NA	grey	grey
THAP9-AS1	IGBP1	NA	grey	grey
THAP9-AS1	IGFBP4	NA	grey	grey
THAP9-AS1	IGFL1P2	NA	grey	grey
THAP9-AS1	IGHD5.18	NA	grey	NA
THAP9-AS1	IGHD5.24	NA	grey	NA
THAP9-AS1	IGHD5.5	NA	grey	NA
THAP9-AS1	IGHJ4	NA	grey	grey
THAP9-AS1	IGHJ5	NA	grey	grey
THAP9-AS1	IGHJ6	NA	grey	grey
THAP9-AS1	IGHVII.15.1	NA	grey	NA
THAP9-AS1	IGHVII.28.1	NA	grey	NA
THAP9-AS1	IGHVII.30.1	NA	grey	NA
THAP9-AS1	IGHVII.44.2	NA	grey	NA
THAP9-AS1	IGHVII.49.1	NA	grey	NA
THAP9-AS1	IGHVII.62.1	NA	grey	NA
THAP9-AS1	IGHVII.65.1	NA	grey	NA
THAP9-AS1	IGHVIII.25.1	NA	grey	NA
THAP9-AS1	IGHVIII.26.1	NA	grey	NA
THAP9-AS1	IGHVIII.5.2	NA	grey	NA
THAP9-AS1	IGHVIII.67.4	NA	grey	NA
THAP9-AS1	IGHVIII.82	NA	grey	NA
THAP9-AS1	IGKJ1	NA	grey	grey
THAP9-AS1	IGKJ2	NA	grey	grey
THAP9-AS1	IGKJ3	NA	grey	grey
THAP9-AS1	IGKJ4	NA	grey	grey
THAP9-AS1	IGKV2.19	NA	grey	NA
THAP9-AS1	IGKV2.38	NA	grey	NA
THAP9-AS1	IGKV2D.19	NA	grey	NA
THAP9-AS1	IGKV2D.38	NA	grey	NA
THAP9-AS1	IGKV3.34	NA	grey	NA
THAP9-AS1	IGLC1	NA	grey	grey
THAP9-AS1	IGLCOR22.2	NA	grey	NA
THAP9-AS1	IGLJ4	NA	grey	grey
THAP9-AS1	IGLV3.7	NA	grey	NA
THAP9-AS1	IGLVI.42	NA	grey	NA
THAP9-AS1	IGLVIV.53	NA	grey	NA
THAP9-AS1	IGLVV.66	NA	grey	NA
THAP9-AS1	IL10RB	NA	grey	grey
THAP9-AS1	IL17RE	NA	grey	grey
THAP9-AS1	IL6RP1	NA	grey	grey
THAP9-AS1	ILKAP	NA	grey	grey
THAP9-AS1	IMP3P1	NA	grey	grey
THAP9-AS1	INE2	NA	grey	grey
THAP9-AS1	INTS9	NA	grey	grey
THAP9-AS1	IPO4	NA	grey	grey
THAP9-AS1	IQCF2	NA	grey	grey
THAP9-AS1	IQCF5	NA	grey	grey
THAP9-AS1	IQCF5.AS1	NA	grey	NA
THAP9-AS1	ISCA2	NA	grey	grey
THAP9-AS1	ISCUP1	NA	grey	grey
THAP9-AS1	ITGB1BP1	NA	grey	grey
THAP9-AS1	ITGB5	NA	grey	grey
THAP9-AS1	JAGN1	NA	grey	grey
THAP9-AS1	JAZF1	NA	grey	grey
THAP9-AS1	JHY	NA	grey	grey
THAP9-AS1	JMJD6	NA	grey	grey
THAP9-AS1	JPT2	NA	grey	grey
THAP9-AS1	JUP	NA	grey	grey
THAP9-AS1	KANSL1L	NA	grey	grey
THAP9-AS1	KASH5	NA	grey	grey
THAP9-AS1	KATNBL1P1	NA	grey	grey
THAP9-AS1	KCNA6	NA	grey	grey
THAP9-AS1	KCNAB1.AS1	NA	grey	NA
THAP9-AS1	KCNC4	NA	grey	grey
THAP9-AS1	KCNIP4	NA	grey	grey
THAP9-AS1	KCNK5	NA	grey	grey
THAP9-AS1	KCTD10P1	NA	grey	grey
THAP9-AS1	KDF1	NA	grey	grey
THAP9-AS1	KDM4F	NA	grey	grey
THAP9-AS1	KHDRBS1	NA	grey	grey
THAP9-AS1	KHSRP	NA	grey	grey
THAP9-AS1	KIAA1143P2	NA	grey	grey
THAP9-AS1	KIAA1671.AS1	NA	grey	NA
THAP9-AS1	KIF26B.AS1	NA	grey	NA
THAP9-AS1	KIF2B	NA	grey	grey
THAP9-AS1	KIR3DP1	NA	grey	grey
THAP9-AS1	KLF4P1	NA	grey	grey
THAP9-AS1	KLK9	NA	grey	grey
THAP9-AS1	KLRC3	NA	grey	grey
THAP9-AS1	KREMEN1	NA	grey	grey
THAP9-AS1	KRT18P1	NA	grey	grey
THAP9-AS1	KRT18P23	NA	grey	grey
THAP9-AS1	KRT18P25	NA	grey	grey
THAP9-AS1	KRT18P49	NA	grey	grey
THAP9-AS1	KRT18P58	NA	grey	grey
THAP9-AS1	KRT18P62	NA	grey	grey
THAP9-AS1	KRT19P6	NA	grey	grey
THAP9-AS1	KRT8P18	NA	grey	grey
THAP9-AS1	KRT8P21	NA	grey	grey
THAP9-AS1	KRT8P36	NA	grey	grey
THAP9-AS1	KRT8P5	NA	grey	grey
THAP9-AS1	KRT8P6	NA	grey	grey
THAP9-AS1	KRTAP10.11	NA	grey	NA
THAP9-AS1	KRTAP10.3	NA	grey	NA
THAP9-AS1	KRTAP10.5	NA	grey	NA
THAP9-AS1	KRTAP10.8	NA	grey	NA
THAP9-AS1	KRTAP12.2	NA	grey	NA
THAP9-AS1	KRTAP12.3	NA	grey	NA
THAP9-AS1	KRTAP12.4	NA	grey	NA
THAP9-AS1	KRTAP12.6P	NA	grey	NA
THAP9-AS1	KRTAP13.3	NA	grey	NA
THAP9-AS1	KRTAP13.4	NA	grey	NA
THAP9-AS1	KRTAP15.1	NA	grey	NA
THAP9-AS1	KRTAP19.1	NA	grey	NA
THAP9-AS1	KRTAP19.2	NA	grey	NA
THAP9-AS1	KRTAP19.3	NA	grey	NA
THAP9-AS1	KRTAP19.4	NA	grey	NA
THAP9-AS1	KRTAP19.5	NA	grey	NA
THAP9-AS1	KRTAP19.6	NA	grey	NA
THAP9-AS1	KRTAP19.7	NA	grey	NA
THAP9-AS1	KRTAP19.8	NA	grey	NA
THAP9-AS1	KRTAP19.9P	NA	grey	NA
THAP9-AS1	KRTAP2.1	NA	grey	NA
THAP9-AS1	KRTAP2.2	NA	grey	NA
THAP9-AS1	KRTAP2.4	NA	grey	NA
THAP9-AS1	KRTAP20.1	NA	grey	NA
THAP9-AS1	KRTAP20.2	NA	grey	NA
THAP9-AS1	KRTAP20.3	NA	grey	NA
THAP9-AS1	KRTAP20.4	NA	grey	NA
THAP9-AS1	KRTAP21.1	NA	grey	NA
THAP9-AS1	KRTAP21.2	NA	grey	NA
THAP9-AS1	KRTAP21.3	NA	grey	NA
THAP9-AS1	KRTAP21.4P	NA	grey	NA
THAP9-AS1	KRTAP22.1	NA	grey	NA
THAP9-AS1	KRTAP22.2	NA	grey	NA
THAP9-AS1	KRTAP23.1	NA	grey	NA
THAP9-AS1	KRTAP24.1	NA	grey	NA
THAP9-AS1	KRTAP25.1	NA	grey	NA
THAP9-AS1	KRTAP26.1	NA	grey	NA
THAP9-AS1	KRTAP27.1	NA	grey	NA
THAP9-AS1	KRTAP4.11	NA	grey	NA
THAP9-AS1	KRTAP4.4	NA	grey	NA
THAP9-AS1	KRTAP5.AS1	NA	grey	NA
THAP9-AS1	KRTAP6.1	NA	grey	NA
THAP9-AS1	KRTAP6.2	NA	grey	NA
THAP9-AS1	KRTAP6.3	NA	grey	NA
THAP9-AS1	KRTAP9.2	NA	grey	NA
THAP9-AS1	KRTAP9.3	NA	grey	NA
THAP9-AS1	KRTAP9.4	NA	grey	NA
THAP9-AS1	KRTAP9.8	NA	grey	NA
THAP9-AS1	KRTAP9.9	NA	grey	NA
THAP9-AS1	L3HYPDH	NA	grey	grey
THAP9-AS1	L3MBTL4.AS1	NA	grey	NA
THAP9-AS1	LAMB2	NA	grey	grey
THAP9-AS1	LAPTM4A	NA	grey	grey
THAP9-AS1	LARP6	NA	grey	grey
THAP9-AS1	LARP7P1	NA	grey	grey
THAP9-AS1	LARP7P4	NA	grey	grey
THAP9-AS1	LAS1L	NA	grey	grey
THAP9-AS1	LCE1A	NA	grey	grey
THAP9-AS1	LCE1D	NA	grey	grey
THAP9-AS1	LCE2B	NA	grey	grey
THAP9-AS1	LCE2C	NA	grey	grey
THAP9-AS1	LCE3B	NA	grey	grey
THAP9-AS1	LCE3C	NA	grey	grey
THAP9-AS1	LCEP1	NA	grey	grey
THAP9-AS1	LCEP2	NA	grey	grey
THAP9-AS1	LDHAL6A	NA	grey	grey
THAP9-AS1	LETMD1	NA	grey	grey
THAP9-AS1	LGALS16	NA	grey	grey
THAP9-AS1	LILRA1	NA	grey	grey
THAP9-AS1	LIME1	NA	grey	grey
THAP9-AS1	LINC00205	NA	grey	grey
THAP9-AS1	LINC00211	NA	grey	grey
THAP9-AS1	LINC00251	NA	grey	grey
THAP9-AS1	LINC00266.2P	NA	grey	NA
THAP9-AS1	LINC00280	NA	grey	grey
THAP9-AS1	LINC00297	NA	grey	grey
THAP9-AS1	LINC00307	NA	grey	grey
THAP9-AS1	LINC00317	NA	grey	grey
THAP9-AS1	LINC00336	NA	grey	grey
THAP9-AS1	LINC00343	NA	grey	grey
THAP9-AS1	LINC00350	NA	grey	grey
THAP9-AS1	LINC00351	NA	grey	grey
THAP9-AS1	LINC00354	NA	grey	grey
THAP9-AS1	LINC00358	NA	grey	grey
THAP9-AS1	LINC00374	NA	grey	grey
THAP9-AS1	LINC00442	NA	grey	grey
THAP9-AS1	LINC00445	NA	grey	grey
THAP9-AS1	LINC00459	NA	grey	grey
THAP9-AS1	LINC00489	NA	grey	grey
THAP9-AS1	LINC00550	NA	grey	grey
THAP9-AS1	LINC00554	NA	grey	grey
THAP9-AS1	LINC00560	NA	grey	grey
THAP9-AS1	LINC00561	NA	grey	grey
THAP9-AS1	LINC00564	NA	grey	grey
THAP9-AS1	LINC00571	NA	grey	grey
THAP9-AS1	LINC00583	NA	grey	grey
THAP9-AS1	LINC00587	NA	grey	grey
THAP9-AS1	LINC00613	NA	grey	grey
THAP9-AS1	LINC00692	NA	grey	grey
THAP9-AS1	LINC00708	NA	grey	grey
THAP9-AS1	LINC00850	NA	grey	grey
THAP9-AS1	LINC00851	NA	grey	grey
THAP9-AS1	LINC00888	NA	grey	grey
THAP9-AS1	LINC00901	NA	grey	grey
THAP9-AS1	LINC00905	NA	grey	grey
THAP9-AS1	LINC00939	NA	grey	grey
THAP9-AS1	LINC01033	NA	grey	grey
THAP9-AS1	LINC01038	NA	grey	grey
THAP9-AS1	LINC01040	NA	grey	grey
THAP9-AS1	LINC01070	NA	grey	grey
THAP9-AS1	LINC01072	NA	grey	grey
THAP9-AS1	LINC01074	NA	grey	grey
THAP9-AS1	LINC01162	NA	grey	grey
THAP9-AS1	LINC01177	NA	grey	grey
THAP9-AS1	LINC01201	NA	grey	grey
THAP9-AS1	LINC01216	NA	grey	grey
THAP9-AS1	LINC01221	NA	grey	grey
THAP9-AS1	LINC01243	NA	grey	grey
THAP9-AS1	LINC01256	NA	grey	grey
THAP9-AS1	LINC01318	NA	grey	grey
THAP9-AS1	LINC01327	NA	grey	grey
THAP9-AS1	LINC01339	NA	grey	grey
THAP9-AS1	LINC01377	NA	grey	grey
THAP9-AS1	LINC01427	NA	grey	grey
THAP9-AS1	LINC01442	NA	grey	grey
THAP9-AS1	LINC01445	NA	grey	grey
THAP9-AS1	LINC01455	NA	grey	grey
THAP9-AS1	LINC01495	NA	grey	grey
THAP9-AS1	LINC01519	NA	grey	grey
THAP9-AS1	LINC01520	NA	grey	grey
THAP9-AS1	LINC01533	NA	grey	grey
THAP9-AS1	LINC01628	NA	grey	grey
THAP9-AS1	LINC01637	NA	grey	grey
THAP9-AS1	LINC01643	NA	grey	grey
THAP9-AS1	LINC01654	NA	grey	grey
THAP9-AS1	LINC01669	NA	grey	grey
THAP9-AS1	LINC01674	NA	grey	grey
THAP9-AS1	LINC01680	NA	grey	grey
THAP9-AS1	LINC01688	NA	grey	grey
THAP9-AS1	LINC01696	NA	grey	grey
THAP9-AS1	LINC01716	NA	grey	grey
THAP9-AS1	LINC01718	NA	grey	grey
THAP9-AS1	LINC01720	NA	grey	grey
THAP9-AS1	LINC01723	NA	grey	grey
THAP9-AS1	LINC01729	NA	grey	grey
THAP9-AS1	LINC01734	NA	grey	grey
THAP9-AS1	LINC01739	NA	grey	grey
THAP9-AS1	LINC01741	NA	grey	grey
THAP9-AS1	LINC01743	NA	grey	grey
THAP9-AS1	LINC01745	NA	grey	grey
THAP9-AS1	LINC01751	NA	grey	grey
THAP9-AS1	LINC01755	NA	grey	grey
THAP9-AS1	LINC01757	NA	grey	grey
THAP9-AS1	LINC01761	NA	grey	grey
THAP9-AS1	LINC01774	NA	grey	grey
THAP9-AS1	LINC01782	NA	grey	grey
THAP9-AS1	LINC01784	NA	grey	grey
THAP9-AS1	LINC01791	NA	grey	grey
THAP9-AS1	LINC01809	NA	grey	grey
THAP9-AS1	LINC01810	NA	grey	grey
THAP9-AS1	LINC01826	NA	grey	grey
THAP9-AS1	LINC01836	NA	grey	grey
THAP9-AS1	LINC01852	NA	grey	grey
THAP9-AS1	LINC01867	NA	grey	grey
THAP9-AS1	LINC01874	NA	grey	grey
THAP9-AS1	LINC01875	NA	grey	grey
THAP9-AS1	LINC01884	NA	grey	grey
THAP9-AS1	LINC01892	NA	grey	grey
THAP9-AS1	LINC01895	NA	grey	grey
THAP9-AS1	LINC01898	NA	grey	grey
THAP9-AS1	LINC01904	NA	grey	grey
THAP9-AS1	LINC01916	NA	grey	grey
THAP9-AS1	LINC01986	NA	grey	grey
THAP9-AS1	LINC02010	NA	grey	grey
THAP9-AS1	LINC02025	NA	grey	grey
THAP9-AS1	LINC02032	NA	grey	grey
THAP9-AS1	LINC02039	NA	grey	grey
THAP9-AS1	LINC02047	NA	grey	grey
THAP9-AS1	LINC02060	NA	grey	grey
THAP9-AS1	LINC02079	NA	grey	grey
THAP9-AS1	LINC02116	NA	grey	grey
THAP9-AS1	LINC02121	NA	grey	grey
THAP9-AS1	LINC02123	NA	grey	grey
THAP9-AS1	LINC02162	NA	grey	grey
THAP9-AS1	LINC02165	NA	grey	grey
THAP9-AS1	LINC02171	NA	grey	grey
THAP9-AS1	LINC02173	NA	grey	grey
THAP9-AS1	LINC02174	NA	grey	grey
THAP9-AS1	LINC02180	NA	grey	grey
THAP9-AS1	LINC02181	NA	grey	grey
THAP9-AS1	LINC02184	NA	grey	grey
THAP9-AS1	LINC02203	NA	grey	grey
THAP9-AS1	LINC02239	NA	grey	grey
THAP9-AS1	LINC02240	NA	grey	grey
THAP9-AS1	LINC02264	NA	grey	grey
THAP9-AS1	LINC02282	NA	grey	grey
THAP9-AS1	LINC02286	NA	grey	grey
THAP9-AS1	LINC02305	NA	grey	grey
THAP9-AS1	LINC02326	NA	grey	grey
THAP9-AS1	LINC02337	NA	grey	grey
THAP9-AS1	LINC02339	NA	grey	grey
THAP9-AS1	LINC02349	NA	grey	grey
THAP9-AS1	LINC02375	NA	grey	grey
THAP9-AS1	LINC02379	NA	grey	grey
THAP9-AS1	LINC02401	NA	grey	grey
THAP9-AS1	LINC02402	NA	grey	grey
THAP9-AS1	LINC02415	NA	grey	grey
THAP9-AS1	LINC02423	NA	grey	grey
THAP9-AS1	LINC02425	NA	grey	grey
THAP9-AS1	LINC02429	NA	grey	grey
THAP9-AS1	LINC02431	NA	grey	grey
THAP9-AS1	LINC02439	NA	grey	grey
THAP9-AS1	LINC02451	NA	grey	grey
THAP9-AS1	LINC02459	NA	grey	grey
THAP9-AS1	LINC02472	NA	grey	grey
THAP9-AS1	LINC02483	NA	grey	grey
THAP9-AS1	LINC02493	NA	grey	grey
THAP9-AS1	LINC02494	NA	grey	grey
THAP9-AS1	LINC02501	NA	grey	grey
THAP9-AS1	LINC02509	NA	grey	grey
THAP9-AS1	LINC02514	NA	grey	grey
THAP9-AS1	LINC02534	NA	grey	grey
THAP9-AS1	LINC02540	NA	grey	grey
THAP9-AS1	LINC02545	NA	grey	grey
THAP9-AS1	LINC02548	NA	grey	grey
THAP9-AS1	LINC02619	NA	grey	grey
THAP9-AS1	LINC02626	NA	grey	grey
THAP9-AS1	LINC02644	NA	grey	grey
THAP9-AS1	LINC02650	NA	grey	grey
THAP9-AS1	LINC02653	NA	grey	grey
THAP9-AS1	LINC02654	NA	grey	grey
THAP9-AS1	LINC02658	NA	grey	grey
THAP9-AS1	LINC02665	NA	grey	grey
THAP9-AS1	LINC02676	NA	grey	grey
THAP9-AS1	LINC02682	NA	grey	grey
THAP9-AS1	LINC02686	NA	grey	grey
THAP9-AS1	LINC02711	NA	grey	grey
THAP9-AS1	LINC02715	NA	grey	grey
THAP9-AS1	LINC02729	NA	grey	grey
THAP9-AS1	LINC02737	NA	grey	grey
THAP9-AS1	LINC02760	NA	grey	grey
THAP9-AS1	LINC02789	NA	grey	grey
THAP9-AS1	LINC02841	NA	grey	grey
THAP9-AS1	LINC02845	NA	grey	grey
THAP9-AS1	LINC02850	NA	grey	grey
THAP9-AS1	LINS1	NA	grey	grey
THAP9-AS1	LLPHP1	NA	grey	grey
THAP9-AS1	LOC100127900	NA	grey	grey
THAP9-AS1	LOC100127978	NA	grey	grey
THAP9-AS1	LOC100127981	NA	grey	grey
THAP9-AS1	LOC100128210	NA	grey	grey
THAP9-AS1	LOC100128293	NA	grey	grey
THAP9-AS1	LOC100128610	NA	grey	grey
THAP9-AS1	LOC100128655	NA	grey	grey
THAP9-AS1	LOC100128865	NA	grey	grey
THAP9-AS1	LOC100129144	NA	grey	grey
THAP9-AS1	LOC100129367	NA	grey	grey
THAP9-AS1	LOC100129404	NA	grey	grey
THAP9-AS1	LOC100129457	NA	grey	grey
THAP9-AS1	LOC100129601	NA	grey	grey
THAP9-AS1	LOC100129607	NA	grey	grey
THAP9-AS1	LOC100129923	NA	grey	grey
THAP9-AS1	LOC100129949	NA	grey	grey
THAP9-AS1	LOC100130044	NA	grey	grey
THAP9-AS1	LOC100130177	NA	grey	grey
THAP9-AS1	LOC100130326	NA	grey	grey
THAP9-AS1	LOC100130548	NA	grey	grey
THAP9-AS1	LOC100130602	NA	grey	grey
THAP9-AS1	LOC100130849	NA	grey	grey
THAP9-AS1	LOC100131041	NA	grey	grey
THAP9-AS1	LOC100131216	NA	grey	grey
THAP9-AS1	LOC100131348	NA	grey	grey
THAP9-AS1	LOC100131441	NA	grey	grey
THAP9-AS1	LOC100131557	NA	grey	grey
THAP9-AS1	LOC100132202	NA	grey	grey
THAP9-AS1	LOC100132280	NA	grey	grey
THAP9-AS1	LOC100132524	NA	grey	grey
THAP9-AS1	LOC100132599	NA	grey	grey
THAP9-AS1	LOC100132647	NA	grey	grey
THAP9-AS1	LOC100132659	NA	grey	grey
THAP9-AS1	LOC100132669	NA	grey	grey
THAP9-AS1	LOC100132762	NA	grey	grey
THAP9-AS1	LOC100132857	NA	grey	grey
THAP9-AS1	LOC100133286	NA	grey	grey
THAP9-AS1	LOC100133316	NA	grey	grey
THAP9-AS1	LOC100287042	NA	grey	grey
THAP9-AS1	LOC100287335	NA	grey	grey
THAP9-AS1	LOC100287355	NA	grey	grey
THAP9-AS1	LOC100287704	NA	grey	grey
THAP9-AS1	LOC100287840	NA	grey	grey
THAP9-AS1	LOC100288233	NA	grey	grey
THAP9-AS1	LOC100288724	NA	grey	grey
THAP9-AS1	LOC100288853	NA	grey	grey
THAP9-AS1	LOC100289416	NA	grey	grey
THAP9-AS1	LOC100418768	NA	grey	grey
THAP9-AS1	LOC100418885	NA	grey	grey
THAP9-AS1	LOC100418956	NA	grey	grey
THAP9-AS1	LOC100418961	NA	grey	grey
THAP9-AS1	LOC100418965	NA	grey	grey
THAP9-AS1	LOC100419016	NA	grey	grey
THAP9-AS1	LOC100419045	NA	grey	grey
THAP9-AS1	LOC100419058	NA	grey	grey
THAP9-AS1	LOC100419092	NA	grey	grey
THAP9-AS1	LOC100419319	NA	grey	grey
THAP9-AS1	LOC100419447	NA	grey	grey
THAP9-AS1	LOC100419616	NA	grey	grey
THAP9-AS1	LOC100419641	NA	grey	grey
THAP9-AS1	LOC100419642	NA	grey	grey
THAP9-AS1	LOC100419644	NA	grey	grey
THAP9-AS1	LOC100419684	NA	grey	grey
THAP9-AS1	LOC100419685	NA	grey	grey
THAP9-AS1	LOC100419691	NA	grey	grey
THAP9-AS1	LOC100419692	NA	grey	grey
THAP9-AS1	LOC100419693	NA	grey	grey
THAP9-AS1	LOC100419713	NA	grey	grey
THAP9-AS1	LOC100419755	NA	grey	grey
THAP9-AS1	LOC100419761	NA	grey	grey
THAP9-AS1	LOC100419762	NA	grey	grey
THAP9-AS1	LOC100419775	NA	grey	grey
THAP9-AS1	LOC100419784	NA	grey	grey
THAP9-AS1	LOC100419791	NA	grey	grey
THAP9-AS1	LOC100419811	NA	grey	grey
THAP9-AS1	LOC100419839	NA	grey	grey
THAP9-AS1	LOC100419859	NA	grey	grey
THAP9-AS1	LOC100419891	NA	grey	grey
THAP9-AS1	LOC100419967	NA	grey	grey
THAP9-AS1	LOC100420008	NA	grey	grey
THAP9-AS1	LOC100420122	NA	grey	grey
THAP9-AS1	LOC100420127	NA	grey	grey
THAP9-AS1	LOC100420166	NA	grey	grey
THAP9-AS1	LOC100420170	NA	grey	grey
THAP9-AS1	LOC100420228	NA	grey	grey
THAP9-AS1	LOC100420250	NA	grey	grey
THAP9-AS1	LOC100420320	NA	grey	grey
THAP9-AS1	LOC100420321	NA	grey	grey
THAP9-AS1	LOC100420325	NA	grey	grey
THAP9-AS1	LOC100420336	NA	grey	grey
THAP9-AS1	LOC100420347	NA	grey	grey
THAP9-AS1	LOC100420385	NA	grey	grey
THAP9-AS1	LOC100420534	NA	grey	grey
THAP9-AS1	LOC100420541	NA	grey	grey
THAP9-AS1	LOC100420545	NA	grey	grey
THAP9-AS1	LOC100420647	NA	grey	grey
THAP9-AS1	LOC100420746	NA	grey	grey
THAP9-AS1	LOC100420765	NA	grey	grey
THAP9-AS1	LOC100420863	NA	grey	grey
THAP9-AS1	LOC100420990	NA	grey	grey
THAP9-AS1	LOC100421009	NA	grey	grey
THAP9-AS1	LOC100421074	NA	grey	grey
THAP9-AS1	LOC100421087	NA	grey	grey
THAP9-AS1	LOC100421116	NA	grey	grey
THAP9-AS1	LOC100421158	NA	grey	grey
THAP9-AS1	LOC100421165	NA	grey	grey
THAP9-AS1	LOC100421202	NA	grey	grey
THAP9-AS1	LOC100421259	NA	grey	grey
THAP9-AS1	LOC100421294	NA	grey	grey
THAP9-AS1	LOC100421308	NA	grey	grey
THAP9-AS1	LOC100421347	NA	grey	grey
THAP9-AS1	LOC100421386	NA	grey	grey
THAP9-AS1	LOC100421387	NA	grey	grey
THAP9-AS1	LOC100421468	NA	grey	grey
THAP9-AS1	LOC100421527	NA	grey	grey
THAP9-AS1	LOC100421548	NA	grey	grey
THAP9-AS1	LOC100421558	NA	grey	grey
THAP9-AS1	LOC100421611	NA	grey	grey
THAP9-AS1	LOC100421651	NA	grey	grey
THAP9-AS1	LOC100421664	NA	grey	grey
THAP9-AS1	LOC100421672	NA	grey	grey
THAP9-AS1	LOC100421674	NA	grey	grey
THAP9-AS1	LOC100421684	NA	grey	grey
THAP9-AS1	LOC100421751	NA	grey	grey
THAP9-AS1	LOC100421782	NA	grey	grey
THAP9-AS1	LOC100421808	NA	grey	grey
THAP9-AS1	LOC100421842	NA	grey	grey
THAP9-AS1	LOC100421901	NA	grey	grey
THAP9-AS1	LOC100421910	NA	grey	grey
THAP9-AS1	LOC100421985	NA	grey	grey
THAP9-AS1	LOC100422044	NA	grey	grey
THAP9-AS1	LOC100422189	NA	grey	grey
THAP9-AS1	LOC100422204	NA	grey	grey
THAP9-AS1	LOC100422267	NA	grey	grey
THAP9-AS1	LOC100422274	NA	grey	grey
THAP9-AS1	LOC100422334	NA	grey	grey
THAP9-AS1	LOC100422376	NA	grey	grey
THAP9-AS1	LOC100422449	NA	grey	grey
THAP9-AS1	LOC100422453	NA	grey	grey
THAP9-AS1	LOC100422491	NA	grey	grey
THAP9-AS1	LOC100422492	NA	grey	grey
THAP9-AS1	LOC100422493	NA	grey	grey
THAP9-AS1	LOC100422497	NA	grey	grey
THAP9-AS1	LOC100422513	NA	grey	grey
THAP9-AS1	LOC100422528	NA	grey	grey
THAP9-AS1	LOC100422529	NA	grey	grey
THAP9-AS1	LOC100422587	NA	grey	grey
THAP9-AS1	LOC100422637	NA	grey	grey
THAP9-AS1	LOC100422638	NA	grey	grey
THAP9-AS1	LOC100422639	NA	grey	grey
THAP9-AS1	LOC100422641	NA	grey	grey
THAP9-AS1	LOC100422671	NA	grey	grey
THAP9-AS1	LOC100422685	NA	grey	grey
THAP9-AS1	LOC100499471	NA	grey	grey
THAP9-AS1	LOC100506302	NA	grey	grey
THAP9-AS1	LOC100506406	NA	grey	grey
THAP9-AS1	LOC100507464	NA	grey	grey
THAP9-AS1	LOC100508046	NA	grey	grey
THAP9-AS1	LOC100533622	NA	grey	grey
THAP9-AS1	LOC100533653	NA	grey	grey
THAP9-AS1	LOC100533706	NA	grey	grey
THAP9-AS1	LOC100533708	NA	grey	grey
THAP9-AS1	LOC100533728	NA	grey	grey
THAP9-AS1	LOC100533736	NA	grey	grey
THAP9-AS1	LOC100631258	NA	grey	grey
THAP9-AS1	LOC100652960	NA	grey	grey
THAP9-AS1	LOC100967223	NA	grey	grey
THAP9-AS1	LOC100996670	NA	grey	grey
THAP9-AS1	LOC101059974	NA	grey	grey
THAP9-AS1	LOC101059997	NA	grey	grey
THAP9-AS1	LOC101060035	NA	grey	grey
THAP9-AS1	LOC101060042	NA	grey	grey
THAP9-AS1	LOC101060158	NA	grey	grey
THAP9-AS1	LOC101060164	NA	grey	grey
THAP9-AS1	LOC101060199	NA	grey	grey
THAP9-AS1	LOC101269108	NA	grey	grey
THAP9-AS1	LOC101926908	NA	grey	grey
THAP9-AS1	LOC101927018	NA	grey	grey
THAP9-AS1	LOC101927141	NA	grey	grey
THAP9-AS1	LOC101927151	NA	grey	grey
THAP9-AS1	LOC101927253	NA	grey	grey
THAP9-AS1	LOC101927358	NA	grey	grey
THAP9-AS1	LOC101927429	NA	grey	grey
THAP9-AS1	LOC101927450	NA	grey	grey
THAP9-AS1	LOC101927572	NA	grey	grey
THAP9-AS1	LOC101927762	NA	grey	grey
THAP9-AS1	LOC101927798	NA	grey	grey
THAP9-AS1	LOC101927827	NA	grey	grey
THAP9-AS1	LOC101927884	NA	grey	grey
THAP9-AS1	LOC101927908	NA	grey	grey
THAP9-AS1	LOC101927993	NA	grey	grey
THAP9-AS1	LOC101928052	NA	grey	grey
THAP9-AS1	LOC101928228	NA	grey	grey
THAP9-AS1	LOC101928392	NA	grey	grey
THAP9-AS1	LOC101928532	NA	grey	grey
THAP9-AS1	LOC101928557	NA	grey	grey
THAP9-AS1	LOC101928661	NA	grey	grey
THAP9-AS1	LOC101928708	NA	grey	grey
THAP9-AS1	LOC101928721	NA	grey	grey
THAP9-AS1	LOC101928739	NA	grey	grey
THAP9-AS1	LOC101929022	NA	grey	grey
THAP9-AS1	LOC101929058	NA	grey	grey
THAP9-AS1	LOC101929073	NA	grey	grey
THAP9-AS1	LOC101929148	NA	grey	grey
THAP9-AS1	LOC101929172	NA	grey	grey
THAP9-AS1	LOC101929439	NA	grey	grey
THAP9-AS1	LOC101929488	NA	grey	grey
THAP9-AS1	LOC101929572	NA	grey	grey
THAP9-AS1	LOC101929598	NA	grey	grey
THAP9-AS1	LOC101930085	NA	grey	grey
THAP9-AS1	LOC102030688	NA	grey	grey
THAP9-AS1	LOC102723566	NA	grey	grey
THAP9-AS1	LOC102723623	NA	grey	grey
THAP9-AS1	LOC102723971	NA	grey	grey
THAP9-AS1	LOC102724452	NA	grey	grey
THAP9-AS1	LOC102724700	NA	grey	grey
THAP9-AS1	LOC102724929	NA	grey	grey
THAP9-AS1	LOC102725532	NA	grey	grey
THAP9-AS1	LOC105370409	NA	grey	grey
THAP9-AS1	LOC105370473	NA	grey	grey
THAP9-AS1	LOC105370586	NA	grey	grey
THAP9-AS1	LOC105370622	NA	grey	grey
THAP9-AS1	LOC105370802	NA	grey	grey
THAP9-AS1	LOC105370829	NA	grey	grey
THAP9-AS1	LOC105370954	NA	grey	grey
THAP9-AS1	LOC105371508	NA	grey	grey
THAP9-AS1	LOC105372352	NA	grey	grey
THAP9-AS1	LOC105372988	NA	grey	grey
THAP9-AS1	LOC105373343	NA	grey	grey
THAP9-AS1	LOC105373373	NA	grey	grey
THAP9-AS1	LOC105373524	NA	grey	grey
THAP9-AS1	LOC105373525	NA	grey	grey
THAP9-AS1	LOC105374516	NA	grey	grey
THAP9-AS1	LOC105374647	NA	grey	grey
THAP9-AS1	LOC105375266	NA	grey	grey
THAP9-AS1	LOC105375297	NA	grey	grey
THAP9-AS1	LOC105375556	NA	grey	grey
THAP9-AS1	LOC105375744	NA	grey	grey
THAP9-AS1	LOC105375843	NA	grey	grey
THAP9-AS1	LOC105375851	NA	grey	grey
THAP9-AS1	LOC105375903	NA	grey	grey
THAP9-AS1	LOC105375972	NA	grey	grey
THAP9-AS1	LOC105376334	NA	grey	grey
THAP9-AS1	LOC105377480	NA	grey	grey
THAP9-AS1	LOC105377488	NA	grey	grey
THAP9-AS1	LOC105377603	NA	grey	grey
THAP9-AS1	LOC105377959	NA	grey	grey
THAP9-AS1	LOC105378044	NA	grey	grey
THAP9-AS1	LOC105378066	NA	grey	grey
THAP9-AS1	LOC105378311	NA	grey	grey
THAP9-AS1	LOC105378464	NA	grey	grey
THAP9-AS1	LOC105379196	NA	grey	grey
THAP9-AS1	LOC107984367	NA	grey	grey
THAP9-AS1	LOC107984704	NA	grey	grey
THAP9-AS1	LOC107985113	NA	grey	grey
THAP9-AS1	LOC107985629	NA	grey	grey
THAP9-AS1	LOC107985801	NA	grey	grey
THAP9-AS1	LOC107986039	NA	grey	grey
THAP9-AS1	LOC107986375	NA	grey	grey
THAP9-AS1	LOC107987035	NA	grey	grey
THAP9-AS1	LOC107987217	NA	grey	grey
THAP9-AS1	LOC107987232	NA	grey	grey
THAP9-AS1	LOC107987328	NA	grey	grey
THAP9-AS1	LOC107987329	NA	grey	grey
THAP9-AS1	LOC108783654	NA	grey	grey
THAP9-AS1	LOC110467520	NA	grey	grey
THAP9-AS1	LOC112267949	NA	grey	grey
THAP9-AS1	LOC112267990	NA	grey	grey
THAP9-AS1	LOC112268018	NA	grey	grey
THAP9-AS1	LOC112268242	NA	grey	grey
THAP9-AS1	LOC112268389	NA	grey	grey
THAP9-AS1	LOC112268410	NA	grey	grey
THAP9-AS1	LOC112268441	NA	grey	grey
THAP9-AS1	LOC121296	NA	grey	grey
THAP9-AS1	LOC257396	NA	grey	grey
THAP9-AS1	LOC284241	NA	grey	grey
THAP9-AS1	LOC339803	NA	grey	grey
THAP9-AS1	LOC340357	NA	grey	grey
THAP9-AS1	LOC390251	NA	grey	grey
THAP9-AS1	LOC390846	NA	grey	grey
THAP9-AS1	LOC390877	NA	grey	grey
THAP9-AS1	LOC391636	NA	grey	grey
THAP9-AS1	LOC391713	NA	grey	grey
THAP9-AS1	LOC392145	NA	grey	grey
THAP9-AS1	LOC392187	NA	grey	grey
THAP9-AS1	LOC392436	NA	grey	grey
THAP9-AS1	LOC392440	NA	grey	grey
THAP9-AS1	LOC392555	NA	grey	grey
THAP9-AS1	LOC402192	NA	grey	grey
THAP9-AS1	LOC402329	NA	grey	grey
THAP9-AS1	LOC403312	NA	grey	grey
THAP9-AS1	LOC441320	NA	grey	grey
THAP9-AS1	LOC441750	NA	grey	grey
THAP9-AS1	LOC442445	NA	grey	grey
THAP9-AS1	LOC554206	NA	grey	grey
THAP9-AS1	LOC642929	NA	grey	grey
THAP9-AS1	LOC643381	NA	grey	grey
THAP9-AS1	LOC645397	NA	grey	grey
THAP9-AS1	LOC647208	NA	grey	grey
THAP9-AS1	LOC648442	NA	grey	grey
THAP9-AS1	LOC729254	NA	grey	grey
THAP9-AS1	LOC729652	NA	grey	grey
THAP9-AS1	LOC731755	NA	grey	grey
THAP9-AS1	LONRF2P5	NA	grey	grey
THAP9-AS1	LRCH4	NA	grey	grey
THAP9-AS1	LRIF1	NA	grey	grey
THAP9-AS1	LRPPRC	NA	grey	grey
THAP9-AS1	LRRC30	NA	grey	grey
THAP9-AS1	LRRC34P2	NA	grey	grey
THAP9-AS1	LRRC6P1	NA	grey	grey
THAP9-AS1	LRRFIP2P1	NA	grey	grey
THAP9-AS1	LSM1P2	NA	grey	grey
THAP9-AS1	LSM3	NA	grey	grey
THAP9-AS1	MACC1	NA	grey	grey
THAP9-AS1	MAGEB1	NA	grey	grey
THAP9-AS1	MAGEB10	NA	grey	grey
THAP9-AS1	MAGEB18	NA	grey	grey
THAP9-AS1	MAGEB4	NA	grey	grey
THAP9-AS1	MAGI2.AS2	NA	grey	NA
THAP9-AS1	MAIP1	NA	grey	grey
THAP9-AS1	MAN2B1	NA	grey	grey
THAP9-AS1	MAP2K1	NA	grey	grey
THAP9-AS1	MAP2K5	NA	grey	grey
THAP9-AS1	MAP3K5	NA	grey	grey
THAP9-AS1	MAP3K7CL	NA	grey	grey
THAP9-AS1	MAPK8IP3	NA	grey	grey
THAP9-AS1	MAPKAP1	NA	grey	grey
THAP9-AS1	MAPKAPK5P1	NA	grey	grey
THAP9-AS1	MARK2P10	NA	grey	grey
THAP9-AS1	MARK2P14	NA	grey	grey
THAP9-AS1	MARK2P4	NA	grey	grey
THAP9-AS1	MARK2P5	NA	grey	grey
THAP9-AS1	MASCRNA	NA	grey	grey
THAP9-AS1	MAX	NA	grey	grey
THAP9-AS1	MBD3L4	NA	grey	grey
THAP9-AS1	MBD3L5	NA	grey	grey
THAP9-AS1	MCM6	NA	grey	grey
THAP9-AS1	MCRIP2P2	NA	grey	grey
THAP9-AS1	MDH1B	NA	grey	grey
THAP9-AS1	MDP1	NA	grey	grey
THAP9-AS1	ME3	NA	grey	grey
THAP9-AS1	MED13P1	NA	grey	grey
THAP9-AS1	MED14P1	NA	grey	grey
THAP9-AS1	MED19	NA	grey	grey
THAP9-AS1	MED28P2	NA	grey	grey
THAP9-AS1	MED28P5	NA	grey	grey
THAP9-AS1	MED28P6	NA	grey	grey
THAP9-AS1	MEMO1P5	NA	grey	grey
THAP9-AS1	MESD	NA	grey	grey
THAP9-AS1	METRNL	NA	grey	grey
THAP9-AS1	METTL3	NA	grey	grey
THAP9-AS1	METTL4	NA	grey	grey
THAP9-AS1	METTL5	NA	grey	grey
THAP9-AS1	METTL7B	NA	grey	grey
THAP9-AS1	MFRP	NA	grey	grey
THAP9-AS1	MFSD11	NA	grey	grey
THAP9-AS1	MGAT4A	NA	grey	grey
THAP9-AS1	MICALL1	NA	grey	grey
THAP9-AS1	MIF4GD	NA	grey	grey
THAP9-AS1	MIOXP1	NA	grey	grey
THAP9-AS1	MIR1.1	NA	grey	NA
THAP9-AS1	MIR100	NA	grey	grey
THAP9-AS1	MIR103A1	NA	grey	grey
THAP9-AS1	MIR105.1	NA	grey	NA
THAP9-AS1	MIR105.2	NA	grey	NA
THAP9-AS1	MIR1179	NA	grey	grey
THAP9-AS1	MIR1183	NA	grey	grey
THAP9-AS1	MIR1184.1	NA	grey	NA
THAP9-AS1	MIR1184.2	NA	grey	NA
THAP9-AS1	MIR1184.3	NA	grey	NA
THAP9-AS1	MIR1185.1	NA	grey	NA
THAP9-AS1	MIR1185.2	NA	grey	NA
THAP9-AS1	MIR1193	NA	grey	grey
THAP9-AS1	MIR1197	NA	grey	grey
THAP9-AS1	MIR1200	NA	grey	grey
THAP9-AS1	MIR1202	NA	grey	grey
THAP9-AS1	MIR12136	NA	grey	grey
THAP9-AS1	MIR1225	NA	grey	grey
THAP9-AS1	MIR1228	NA	grey	grey
THAP9-AS1	MIR1231	NA	grey	grey
THAP9-AS1	MIR1233.1	NA	grey	NA
THAP9-AS1	MIR1233.2	NA	grey	NA
THAP9-AS1	MIR1237	NA	grey	grey
THAP9-AS1	MIR1238	NA	grey	grey
THAP9-AS1	MIR124.2	NA	grey	NA
THAP9-AS1	MIR124.3	NA	grey	NA
THAP9-AS1	MIR1252	NA	grey	grey
THAP9-AS1	MIR1253	NA	grey	grey
THAP9-AS1	MIR1256	NA	grey	grey
THAP9-AS1	MIR1258	NA	grey	grey
THAP9-AS1	MIR125A	NA	grey	grey
THAP9-AS1	MIR1260A	NA	grey	grey
THAP9-AS1	MIR1260B	NA	grey	grey
THAP9-AS1	MIR1261	NA	grey	grey
THAP9-AS1	MIR1263	NA	grey	grey
THAP9-AS1	MIR1264	NA	grey	grey
THAP9-AS1	MIR1265	NA	grey	grey
THAP9-AS1	MIR1269A	NA	grey	grey
THAP9-AS1	MIR127	NA	grey	grey
THAP9-AS1	MIR1275	NA	grey	grey
THAP9-AS1	MIR128.2	NA	grey	NA
THAP9-AS1	MIR1282	NA	grey	grey
THAP9-AS1	MIR1283.1	NA	grey	NA
THAP9-AS1	MIR1283.2	NA	grey	NA
THAP9-AS1	MIR1289.2	NA	grey	NA
THAP9-AS1	MIR129.1	NA	grey	NA
THAP9-AS1	MIR1298	NA	grey	grey
THAP9-AS1	MIR1302.4	NA	grey	NA
THAP9-AS1	MIR1302.6	NA	grey	NA
THAP9-AS1	MIR1305	NA	grey	grey
THAP9-AS1	MIR132	NA	grey	grey
THAP9-AS1	MIR1323	NA	grey	grey
THAP9-AS1	MIR133B	NA	grey	grey
THAP9-AS1	MIR134	NA	grey	grey
THAP9-AS1	MIR135A2	NA	grey	grey
THAP9-AS1	MIR136	NA	grey	grey
THAP9-AS1	MIR139	NA	grey	grey
THAP9-AS1	MIR141	NA	grey	grey
THAP9-AS1	MIR145	NA	grey	grey
THAP9-AS1	MIR1468	NA	grey	grey
THAP9-AS1	MIR1470	NA	grey	grey
THAP9-AS1	MIR1471	NA	grey	grey
THAP9-AS1	MIR151A	NA	grey	grey
THAP9-AS1	MIR153.2	NA	grey	NA
THAP9-AS1	MIR1538	NA	grey	grey
THAP9-AS1	MIR154	NA	grey	grey
THAP9-AS1	MIR1587	NA	grey	grey
THAP9-AS1	MIR15B	NA	grey	grey
THAP9-AS1	MIR16.1	NA	grey	NA
THAP9-AS1	MIR16.2	NA	grey	NA
THAP9-AS1	MIR181A1	NA	grey	grey
THAP9-AS1	MIR182	NA	grey	grey
THAP9-AS1	MIR1827	NA	grey	grey
THAP9-AS1	MIR183	NA	grey	grey
THAP9-AS1	MIR184	NA	grey	grey
THAP9-AS1	MIR185	NA	grey	grey
THAP9-AS1	MIR188	NA	grey	grey
THAP9-AS1	MIR190A	NA	grey	grey
THAP9-AS1	MIR190B	NA	grey	grey
THAP9-AS1	MIR1911	NA	grey	grey
THAP9-AS1	MIR1912	NA	grey	grey
THAP9-AS1	MIR193B	NA	grey	grey
THAP9-AS1	MIR196A2	NA	grey	grey
THAP9-AS1	MIR1976	NA	grey	grey
THAP9-AS1	MIR200C	NA	grey	grey
THAP9-AS1	MIR204	NA	grey	grey
THAP9-AS1	MIR2053	NA	grey	grey
THAP9-AS1	MIR206	NA	grey	grey
THAP9-AS1	MIR2113	NA	grey	grey
THAP9-AS1	MIR2114	NA	grey	grey
THAP9-AS1	MIR2115	NA	grey	grey
THAP9-AS1	MIR212	NA	grey	grey
THAP9-AS1	MIR216A	NA	grey	grey
THAP9-AS1	MIR216B	NA	grey	grey
THAP9-AS1	MIR217	NA	grey	grey
THAP9-AS1	MIR2392	NA	grey	grey
THAP9-AS1	MIR2681	NA	grey	grey
THAP9-AS1	MIR28	NA	grey	grey
THAP9-AS1	MIR297	NA	grey	grey
THAP9-AS1	MIR300	NA	grey	grey
THAP9-AS1	MIR301A	NA	grey	grey
THAP9-AS1	MIR301B	NA	grey	grey
THAP9-AS1	MIR302E	NA	grey	grey
THAP9-AS1	MIR3074	NA	grey	grey
THAP9-AS1	MIR30A	NA	grey	grey
THAP9-AS1	MIR30D	NA	grey	grey
THAP9-AS1	MIR30E	NA	grey	grey
THAP9-AS1	MIR3118.1	NA	grey	NA
THAP9-AS1	MIR3118.2	NA	grey	NA
THAP9-AS1	MIR3118.3	NA	grey	NA
THAP9-AS1	MIR3118.4	NA	grey	NA
THAP9-AS1	MIR3119.2	NA	grey	NA
THAP9-AS1	MIR3123	NA	grey	grey
THAP9-AS1	MIR3124	NA	grey	grey
THAP9-AS1	MIR3140	NA	grey	grey
THAP9-AS1	MIR3141	NA	grey	grey
THAP9-AS1	MIR3144	NA	grey	grey
THAP9-AS1	MIR3148	NA	grey	grey
THAP9-AS1	MIR3152	NA	grey	grey
THAP9-AS1	MIR3154	NA	grey	grey
THAP9-AS1	MIR3156.1	NA	grey	NA
THAP9-AS1	MIR3156.2	NA	grey	NA
THAP9-AS1	MIR3156.3	NA	grey	NA
THAP9-AS1	MIR3160.1	NA	grey	NA
THAP9-AS1	MIR3169	NA	grey	grey
THAP9-AS1	MIR3171	NA	grey	grey
THAP9-AS1	MIR3179.2	NA	grey	NA
THAP9-AS1	MIR3179.3	NA	grey	NA
THAP9-AS1	MIR3179.4	NA	grey	NA
THAP9-AS1	MIR3180.1	NA	grey	NA
THAP9-AS1	MIR3180.2	NA	grey	NA
THAP9-AS1	MIR3180.3	NA	grey	NA
THAP9-AS1	MIR3180.4	NA	grey	NA
THAP9-AS1	MIR3180.5	NA	grey	NA
THAP9-AS1	MIR3182	NA	grey	grey
THAP9-AS1	MIR3185	NA	grey	grey
THAP9-AS1	MIR3187	NA	grey	grey
THAP9-AS1	MIR3190	NA	grey	grey
THAP9-AS1	MIR3194	NA	grey	grey
THAP9-AS1	MIR3195	NA	grey	grey
THAP9-AS1	MIR3201	NA	grey	grey
THAP9-AS1	MIR320B1	NA	grey	grey
THAP9-AS1	MIR323A	NA	grey	grey
THAP9-AS1	MIR323B	NA	grey	grey
THAP9-AS1	MIR325	NA	grey	grey
THAP9-AS1	MIR329.1	NA	grey	NA
THAP9-AS1	MIR329.2	NA	grey	NA
THAP9-AS1	MIR335	NA	grey	grey
THAP9-AS1	MIR337	NA	grey	grey
THAP9-AS1	MIR346	NA	grey	grey
THAP9-AS1	MIR34B	NA	grey	grey
THAP9-AS1	MIR3591	NA	grey	grey
THAP9-AS1	MIR3612	NA	grey	grey
THAP9-AS1	MIR3617	NA	grey	grey
THAP9-AS1	MIR362	NA	grey	grey
THAP9-AS1	MIR3621	NA	grey	grey
THAP9-AS1	MIR3622B	NA	grey	grey
THAP9-AS1	MIR3648.1	NA	grey	NA
THAP9-AS1	MIR3648.2	NA	grey	NA
THAP9-AS1	MIR3650	NA	grey	grey
THAP9-AS1	MIR3659	NA	grey	grey
THAP9-AS1	MIR3665	NA	grey	grey
THAP9-AS1	MIR3668	NA	grey	grey
THAP9-AS1	MIR3670.1	NA	grey	NA
THAP9-AS1	MIR3670.2	NA	grey	NA
THAP9-AS1	MIR3670.3	NA	grey	NA
THAP9-AS1	MIR3670.4	NA	grey	NA
THAP9-AS1	MIR3672	NA	grey	grey
THAP9-AS1	MIR3675	NA	grey	grey
THAP9-AS1	MIR3678	NA	grey	grey
THAP9-AS1	MIR3681	NA	grey	grey
THAP9-AS1	MIR3683	NA	grey	grey
THAP9-AS1	MIR3689A	NA	grey	grey
THAP9-AS1	MIR3689B	NA	grey	grey
THAP9-AS1	MIR3689C	NA	grey	grey
THAP9-AS1	MIR3689D1	NA	grey	grey
THAP9-AS1	MIR3689D2	NA	grey	grey
THAP9-AS1	MIR3689E	NA	grey	grey
THAP9-AS1	MIR3689F	NA	grey	grey
THAP9-AS1	MIR371A	NA	grey	grey
THAP9-AS1	MIR372	NA	grey	grey
THAP9-AS1	MIR373	NA	grey	grey
THAP9-AS1	MIR374A	NA	grey	grey
THAP9-AS1	MIR378C	NA	grey	grey
THAP9-AS1	MIR378D1	NA	grey	grey
THAP9-AS1	MIR378F	NA	grey	grey
THAP9-AS1	MIR379	NA	grey	grey
THAP9-AS1	MIR381	NA	grey	grey
THAP9-AS1	MIR383	NA	grey	grey
THAP9-AS1	MIR3908	NA	grey	grey
THAP9-AS1	MIR3913.1	NA	grey	NA
THAP9-AS1	MIR3914.1	NA	grey	NA
THAP9-AS1	MIR3915	NA	grey	grey
THAP9-AS1	MIR3918	NA	grey	grey
THAP9-AS1	MIR3919	NA	grey	grey
THAP9-AS1	MIR3920	NA	grey	grey
THAP9-AS1	MIR3922	NA	grey	grey
THAP9-AS1	MIR3923	NA	grey	grey
THAP9-AS1	MIR3927	NA	grey	grey
THAP9-AS1	MIR3934	NA	grey	grey
THAP9-AS1	MIR3935	NA	grey	grey
THAP9-AS1	MIR3937	NA	grey	grey
THAP9-AS1	MIR3938	NA	grey	grey
THAP9-AS1	MIR3943	NA	grey	grey
THAP9-AS1	MIR3945	NA	grey	grey
THAP9-AS1	MIR3973	NA	grey	grey
THAP9-AS1	MIR3976	NA	grey	grey
THAP9-AS1	MIR3978	NA	grey	grey
THAP9-AS1	MIR4259	NA	grey	grey
THAP9-AS1	MIR4262	NA	grey	grey
THAP9-AS1	MIR4263	NA	grey	grey
THAP9-AS1	MIR4264	NA	grey	grey
THAP9-AS1	MIR4266	NA	grey	grey
THAP9-AS1	MIR4267	NA	grey	grey
THAP9-AS1	MIR4268	NA	grey	grey
THAP9-AS1	MIR4271	NA	grey	grey
THAP9-AS1	MIR4273	NA	grey	grey
THAP9-AS1	MIR4274	NA	grey	grey
THAP9-AS1	MIR4276	NA	grey	grey
THAP9-AS1	MIR4279	NA	grey	grey
THAP9-AS1	MIR4280	NA	grey	grey
THAP9-AS1	MIR4281	NA	grey	grey
THAP9-AS1	MIR4282	NA	grey	grey
THAP9-AS1	MIR4283.1	NA	grey	NA
THAP9-AS1	MIR4283.2	NA	grey	NA
THAP9-AS1	MIR4285	NA	grey	grey
THAP9-AS1	MIR4287	NA	grey	grey
THAP9-AS1	MIR4288	NA	grey	grey
THAP9-AS1	MIR4289	NA	grey	grey
THAP9-AS1	MIR4290	NA	grey	grey
THAP9-AS1	MIR4291	NA	grey	grey
THAP9-AS1	MIR4293	NA	grey	grey
THAP9-AS1	MIR4299	NA	grey	grey
THAP9-AS1	MIR4300	NA	grey	grey
THAP9-AS1	MIR4301	NA	grey	grey
THAP9-AS1	MIR4303	NA	grey	grey
THAP9-AS1	MIR4307	NA	grey	grey
THAP9-AS1	MIR4308	NA	grey	grey
THAP9-AS1	MIR4309	NA	grey	grey
THAP9-AS1	MIR431	NA	grey	grey
THAP9-AS1	MIR4318	NA	grey	grey
THAP9-AS1	MIR432	NA	grey	grey
THAP9-AS1	MIR4325	NA	grey	grey
THAP9-AS1	MIR4327	NA	grey	grey
THAP9-AS1	MIR433	NA	grey	grey
THAP9-AS1	MIR4330	NA	grey	grey
THAP9-AS1	MIR4422	NA	grey	grey
THAP9-AS1	MIR4425	NA	grey	grey
THAP9-AS1	MIR4429	NA	grey	grey
THAP9-AS1	MIR4432	NA	grey	grey
THAP9-AS1	MIR4435.2HG	NA	grey	NA
THAP9-AS1	MIR4436B1	NA	grey	grey
THAP9-AS1	MIR4436B2	NA	grey	grey
THAP9-AS1	MIR4437	NA	grey	grey
THAP9-AS1	MIR4439	NA	grey	grey
THAP9-AS1	MIR4441	NA	grey	grey
THAP9-AS1	MIR4443	NA	grey	grey
THAP9-AS1	MIR4445	NA	grey	grey
THAP9-AS1	MIR4446	NA	grey	grey
THAP9-AS1	MIR4447	NA	grey	grey
THAP9-AS1	MIR4451	NA	grey	grey
THAP9-AS1	MIR4455	NA	grey	grey
THAP9-AS1	MIR4456	NA	grey	grey
THAP9-AS1	MIR4463	NA	grey	grey
THAP9-AS1	MIR4464	NA	grey	grey
THAP9-AS1	MIR4465	NA	grey	grey
THAP9-AS1	MIR4466	NA	grey	grey
THAP9-AS1	MIR4471	NA	grey	grey
THAP9-AS1	MIR4472.1	NA	grey	NA
THAP9-AS1	MIR4475	NA	grey	grey
THAP9-AS1	MIR4476	NA	grey	grey
THAP9-AS1	MIR4477A	NA	grey	grey
THAP9-AS1	MIR448	NA	grey	grey
THAP9-AS1	MIR4482	NA	grey	grey
THAP9-AS1	MIR4484	NA	grey	grey
THAP9-AS1	MIR4487	NA	grey	grey
THAP9-AS1	MIR4488	NA	grey	grey
THAP9-AS1	MIR4490	NA	grey	grey
THAP9-AS1	MIR4492	NA	grey	grey
THAP9-AS1	MIR4493	NA	grey	grey
THAP9-AS1	MIR4495	NA	grey	grey
THAP9-AS1	MIR4498	NA	grey	grey
THAP9-AS1	MIR449A	NA	grey	grey
THAP9-AS1	MIR449B	NA	grey	grey
THAP9-AS1	MIR449C	NA	grey	grey
THAP9-AS1	MIR4503	NA	grey	grey
THAP9-AS1	MIR4508	NA	grey	grey
THAP9-AS1	MIR4509.1	NA	grey	NA
THAP9-AS1	MIR4509.2	NA	grey	NA
THAP9-AS1	MIR4509.3	NA	grey	NA
THAP9-AS1	MIR450A1	NA	grey	grey
THAP9-AS1	MIR450A2	NA	grey	grey
THAP9-AS1	MIR450B	NA	grey	grey
THAP9-AS1	MIR4510	NA	grey	grey
THAP9-AS1	MIR4519	NA	grey	grey
THAP9-AS1	MIR4527	NA	grey	grey
THAP9-AS1	MIR4528	NA	grey	grey
THAP9-AS1	MIR4529	NA	grey	grey
THAP9-AS1	MIR4533	NA	grey	grey
THAP9-AS1	MIR4535	NA	grey	grey
THAP9-AS1	MIR4536.2	NA	grey	NA
THAP9-AS1	MIR4540	NA	grey	grey
THAP9-AS1	MIR4638	NA	grey	grey
THAP9-AS1	MIR4643	NA	grey	grey
THAP9-AS1	MIR4650.2	NA	grey	NA
THAP9-AS1	MIR4652	NA	grey	grey
THAP9-AS1	MIR4656	NA	grey	grey
THAP9-AS1	MIR466	NA	grey	grey
THAP9-AS1	MIR4661	NA	grey	grey
THAP9-AS1	MIR4662B	NA	grey	grey
THAP9-AS1	MIR4666B	NA	grey	grey
THAP9-AS1	MIR4670	NA	grey	grey
THAP9-AS1	MIR4671	NA	grey	grey
THAP9-AS1	MIR4673	NA	grey	grey
THAP9-AS1	MIR4679.2	NA	grey	NA
THAP9-AS1	MIR4684	NA	grey	grey
THAP9-AS1	MIR4695	NA	grey	grey
THAP9-AS1	MIR4699	NA	grey	grey
THAP9-AS1	MIR4703	NA	grey	grey
THAP9-AS1	MIR4704	NA	grey	grey
THAP9-AS1	MIR4705	NA	grey	grey
THAP9-AS1	MIR4708	NA	grey	grey
THAP9-AS1	MIR4713	NA	grey	grey
THAP9-AS1	MIR4715	NA	grey	grey
THAP9-AS1	MIR4716	NA	grey	grey
THAP9-AS1	MIR4718	NA	grey	grey
THAP9-AS1	MIR4719	NA	grey	grey
THAP9-AS1	MIR4725	NA	grey	grey
THAP9-AS1	MIR4726	NA	grey	grey
THAP9-AS1	MIR4730	NA	grey	grey
THAP9-AS1	MIR4736	NA	grey	grey
THAP9-AS1	MIR4739	NA	grey	grey
THAP9-AS1	MIR4746	NA	grey	grey
THAP9-AS1	MIR4747	NA	grey	grey
THAP9-AS1	MIR4749	NA	grey	grey
THAP9-AS1	MIR4752	NA	grey	grey
THAP9-AS1	MIR4756	NA	grey	grey
THAP9-AS1	MIR4759	NA	grey	grey
THAP9-AS1	MIR4760	NA	grey	grey
THAP9-AS1	MIR4765	NA	grey	grey
THAP9-AS1	MIR4766	NA	grey	grey
THAP9-AS1	MIR4769	NA	grey	grey
THAP9-AS1	MIR4770	NA	grey	grey
THAP9-AS1	MIR4771.1	NA	grey	NA
THAP9-AS1	MIR4773.1	NA	grey	NA
THAP9-AS1	MIR4776.1	NA	grey	NA
THAP9-AS1	MIR4778	NA	grey	grey
THAP9-AS1	MIR4779	NA	grey	grey
THAP9-AS1	MIR4780	NA	grey	grey
THAP9-AS1	MIR4787	NA	grey	grey
THAP9-AS1	MIR4789	NA	grey	grey
THAP9-AS1	MIR4790	NA	grey	grey
THAP9-AS1	MIR4791	NA	grey	grey
THAP9-AS1	MIR4794	NA	grey	grey
THAP9-AS1	MIR4798	NA	grey	grey
THAP9-AS1	MIR4801	NA	grey	grey
THAP9-AS1	MIR4803	NA	grey	grey
THAP9-AS1	MIR485	NA	grey	grey
THAP9-AS1	MIR487A	NA	grey	grey
THAP9-AS1	MIR487B	NA	grey	grey
THAP9-AS1	MIR488	NA	grey	grey
THAP9-AS1	MIR489	NA	grey	grey
THAP9-AS1	MIR490	NA	grey	grey
THAP9-AS1	MIR494	NA	grey	grey
THAP9-AS1	MIR495	NA	grey	grey
THAP9-AS1	MIR496	NA	grey	grey
THAP9-AS1	MIR498	NA	grey	grey
THAP9-AS1	MIR5007	NA	grey	grey
THAP9-AS1	MIR500A	NA	grey	grey
THAP9-AS1	MIR500B	NA	grey	grey
THAP9-AS1	MIR501	NA	grey	grey
THAP9-AS1	MIR5011	NA	grey	grey
THAP9-AS1	MIR502	NA	grey	grey
THAP9-AS1	MIR503	NA	grey	grey
THAP9-AS1	MIR504	NA	grey	grey
THAP9-AS1	MIR505	NA	grey	grey
THAP9-AS1	MIR506	NA	grey	grey
THAP9-AS1	MIR508	NA	grey	grey
THAP9-AS1	MIR509.3	NA	grey	NA
THAP9-AS1	MIR5094	NA	grey	grey
THAP9-AS1	MIR510	NA	grey	grey
THAP9-AS1	MIR5100	NA	grey	grey
THAP9-AS1	MIR511	NA	grey	grey
THAP9-AS1	MIR512.1	NA	grey	NA
THAP9-AS1	MIR512.2	NA	grey	NA
THAP9-AS1	MIR513A1	NA	grey	grey
THAP9-AS1	MIR513B	NA	grey	grey
THAP9-AS1	MIR514A1	NA	grey	grey
THAP9-AS1	MIR514A2	NA	grey	grey
THAP9-AS1	MIR514A3	NA	grey	grey
THAP9-AS1	MIR515.1	NA	grey	NA
THAP9-AS1	MIR515.2	NA	grey	NA
THAP9-AS1	MIR516A1	NA	grey	grey
THAP9-AS1	MIR516A2	NA	grey	grey
THAP9-AS1	MIR516B1	NA	grey	grey
THAP9-AS1	MIR516B2	NA	grey	grey
THAP9-AS1	MIR517A	NA	grey	grey
THAP9-AS1	MIR517B	NA	grey	grey
THAP9-AS1	MIR517C	NA	grey	grey
THAP9-AS1	MIR518A1	NA	grey	grey
THAP9-AS1	MIR518A2	NA	grey	grey
THAP9-AS1	MIR518B	NA	grey	grey
THAP9-AS1	MIR518E	NA	grey	grey
THAP9-AS1	MIR518F	NA	grey	grey
THAP9-AS1	MIR5197	NA	grey	grey
THAP9-AS1	MIR519A1	NA	grey	grey
THAP9-AS1	MIR519B	NA	grey	grey
THAP9-AS1	MIR519C	NA	grey	grey
THAP9-AS1	MIR519D	NA	grey	grey
THAP9-AS1	MIR519E	NA	grey	grey
THAP9-AS1	MIR520A	NA	grey	grey
THAP9-AS1	MIR520B	NA	grey	grey
THAP9-AS1	MIR520C	NA	grey	grey
THAP9-AS1	MIR520D	NA	grey	grey
THAP9-AS1	MIR520E	NA	grey	grey
THAP9-AS1	MIR520G	NA	grey	grey
THAP9-AS1	MIR520H	NA	grey	grey
THAP9-AS1	MIR521.1	NA	grey	NA
THAP9-AS1	MIR521.2	NA	grey	NA
THAP9-AS1	MIR525	NA	grey	grey
THAP9-AS1	MIR526A1	NA	grey	grey
THAP9-AS1	MIR526A2	NA	grey	grey
THAP9-AS1	MIR526B	NA	grey	grey
THAP9-AS1	MIR527	NA	grey	grey
THAP9-AS1	MIR532	NA	grey	grey
THAP9-AS1	MIR542	NA	grey	grey
THAP9-AS1	MIR544A	NA	grey	grey
THAP9-AS1	MIR548A2	NA	grey	grey
THAP9-AS1	MIR548AB	NA	grey	grey
THAP9-AS1	MIR548AD	NA	grey	grey
THAP9-AS1	MIR548AE1	NA	grey	grey
THAP9-AS1	MIR548AE2	NA	grey	grey
THAP9-AS1	MIR548AG1	NA	grey	grey
THAP9-AS1	MIR548AI	NA	grey	grey
THAP9-AS1	MIR548AJ1	NA	grey	grey
THAP9-AS1	MIR548AJ2	NA	grey	grey
THAP9-AS1	MIR548AK	NA	grey	grey
THAP9-AS1	MIR548AO	NA	grey	grey
THAP9-AS1	MIR548AP	NA	grey	grey
THAP9-AS1	MIR548AS	NA	grey	grey
THAP9-AS1	MIR548AV	NA	grey	grey
THAP9-AS1	MIR548AW	NA	grey	grey
THAP9-AS1	MIR548AX	NA	grey	grey
THAP9-AS1	MIR548AZ	NA	grey	grey
THAP9-AS1	MIR548B	NA	grey	grey
THAP9-AS1	MIR548BA	NA	grey	grey
THAP9-AS1	MIR548BB	NA	grey	grey
THAP9-AS1	MIR548F1	NA	grey	grey
THAP9-AS1	MIR548F2	NA	grey	grey
THAP9-AS1	MIR548F3	NA	grey	grey
THAP9-AS1	MIR548F4	NA	grey	grey
THAP9-AS1	MIR548F5	NA	grey	grey
THAP9-AS1	MIR548G	NA	grey	grey
THAP9-AS1	MIR548H2	NA	grey	grey
THAP9-AS1	MIR548H4	NA	grey	grey
THAP9-AS1	MIR548H5	NA	grey	grey
THAP9-AS1	MIR548I3	NA	grey	grey
THAP9-AS1	MIR548I4	NA	grey	grey
THAP9-AS1	MIR548M	NA	grey	grey
THAP9-AS1	MIR548O2	NA	grey	grey
THAP9-AS1	MIR548T	NA	grey	grey
THAP9-AS1	MIR548W	NA	grey	grey
THAP9-AS1	MIR548X	NA	grey	grey
THAP9-AS1	MIR548X2	NA	grey	grey
THAP9-AS1	MIR551A	NA	grey	grey
THAP9-AS1	MIR551B	NA	grey	grey
THAP9-AS1	MIR552	NA	grey	grey
THAP9-AS1	MIR554	NA	grey	grey
THAP9-AS1	MIR557	NA	grey	grey
THAP9-AS1	MIR5571	NA	grey	grey
THAP9-AS1	MIR5579	NA	grey	grey
THAP9-AS1	MIR5583.1	NA	grey	NA
THAP9-AS1	MIR5584	NA	grey	grey
THAP9-AS1	MIR5589	NA	grey	grey
THAP9-AS1	MIR5591	NA	grey	grey
THAP9-AS1	MIR567	NA	grey	grey
THAP9-AS1	MIR5681A	NA	grey	grey
THAP9-AS1	MIR5689	NA	grey	grey
THAP9-AS1	MIR5692A2	NA	grey	grey
THAP9-AS1	MIR5692C1	NA	grey	grey
THAP9-AS1	MIR5694	NA	grey	grey
THAP9-AS1	MIR5696	NA	grey	grey
THAP9-AS1	MIR5701.1	NA	grey	NA
THAP9-AS1	MIR5701.2	NA	grey	NA
THAP9-AS1	MIR5701.3	NA	grey	NA
THAP9-AS1	MIR5702	NA	grey	grey
THAP9-AS1	MIR5705	NA	grey	grey
THAP9-AS1	MIR5706	NA	grey	grey
THAP9-AS1	MIR5707	NA	grey	grey
THAP9-AS1	MIR5708	NA	grey	grey
THAP9-AS1	MIR575	NA	grey	grey
THAP9-AS1	MIR577	NA	grey	grey
THAP9-AS1	MIR583	NA	grey	grey
THAP9-AS1	MIR584	NA	grey	grey
THAP9-AS1	MIR586	NA	grey	grey
THAP9-AS1	MIR591	NA	grey	grey
THAP9-AS1	MIR592	NA	grey	grey
THAP9-AS1	MIR595	NA	grey	grey
THAP9-AS1	MIR603	NA	grey	grey
THAP9-AS1	MIR6072	NA	grey	grey
THAP9-AS1	MIR6074	NA	grey	grey
THAP9-AS1	MIR6078	NA	grey	grey
THAP9-AS1	MIR6080	NA	grey	grey
THAP9-AS1	MIR6082	NA	grey	grey
THAP9-AS1	MIR6083	NA	grey	grey
THAP9-AS1	MIR6089	NA	grey	grey
THAP9-AS1	MIR6126	NA	grey	grey
THAP9-AS1	MIR6127	NA	grey	grey
THAP9-AS1	MIR6129	NA	grey	grey
THAP9-AS1	MIR613	NA	grey	grey
THAP9-AS1	MIR6130	NA	grey	grey
THAP9-AS1	MIR6133	NA	grey	grey
THAP9-AS1	MIR6134	NA	grey	grey
THAP9-AS1	MIR617	NA	grey	grey
THAP9-AS1	MIR618	NA	grey	grey
THAP9-AS1	MIR620	NA	grey	grey
THAP9-AS1	MIR625	NA	grey	grey
THAP9-AS1	MIR626	NA	grey	grey
THAP9-AS1	MIR629	NA	grey	grey
THAP9-AS1	MIR6500	NA	grey	grey
THAP9-AS1	MIR6504	NA	grey	grey
THAP9-AS1	MIR6507	NA	grey	grey
THAP9-AS1	MIR6511A1	NA	grey	grey
THAP9-AS1	MIR6511A2	NA	grey	grey
THAP9-AS1	MIR6511A3	NA	grey	grey
[truncated: 3,398 more rows]

## Sheet: COAD_normal
gene1	gene2	correlation	module1	module2
THAP9-AS1	A1BG	8.68e-06	red	red
THAP9-AS1	ACAP3	1.71e-05	red	red
THAP9-AS1	ACTE1P	1.51e-08	red	red
THAP9-AS1	ADAMTS14	0.000461	red	red
THAP9-AS1	ADAT2	0.00479	red	red
THAP9-AS1	ADGRD2	7.07e-10	red	red
THAP9-AS1	AFG3L1P	0.003949	red	red
THAP9-AS1	AGAP6	0.001178	red	red
THAP9-AS1	AGER	7.31e-05	red	red
THAP9-AS1	AGGF1P6	1.26e-06	red	red
THAP9-AS1	AHSA2P	0.003505	red	red
THAP9-AS1	AIDAP2	9.8e-05	red	red
THAP9-AS1	AJAP1	6.12e-09	red	red
THAP9-AS1	ALG1L13P	2.96e-05	red	red
THAP9-AS1	ALKBH6	0.000733	red	red
THAP9-AS1	AMH	1.37e-05	red	red
THAP9-AS1	ANGPTL6	5.66e-06	red	red
THAP9-AS1	ANKRD61	0.000324	red	red
THAP9-AS1	ANKRD66	1.58e-10	red	red
THAP9-AS1	ANKS3	9.29e-05	red	red
THAP9-AS1	ANO8	0.000614	red	red
THAP9-AS1	AOAH.IT1	2.79e-09	red	NA
THAP9-AS1	AP4B1.AS1	0.000582	red	NA
THAP9-AS1	ARAP1.AS2	0.000395	red	NA
THAP9-AS1	ARGLU1	0.001673	red	red
THAP9-AS1	ARHGAP27P1.BPTFP1.KPNA2P3	0.001166	red	NA
THAP9-AS1	ARHGAP8	0.002771	red	red
THAP9-AS1	ARPC4.TTLL3	3.78e-05	red	NA
THAP9-AS1	ARR3	0.000585	red	red
THAP9-AS1	ASNSP3	4.07e-07	red	red
THAP9-AS1	ATF7.NPFF	0.000629	red	NA
THAP9-AS1	ATP1A1.AS1	1.25e-05	red	NA
THAP9-AS1	ATP2A1	0.000537	red	red
THAP9-AS1	ATP2C2.AS1	0.001316	red	NA
THAP9-AS1	ATP5F1BP1	1.95e-09	red	red
THAP9-AS1	ATP5POP1	4.7e-11	red	red
THAP9-AS1	ATP6V1G1P4	6.6e-08	red	red
THAP9-AS1	ATXN7L2	5.05e-05	red	red
THAP9-AS1	B3GAT2	0.000117	red	red
THAP9-AS1	B4GALT4.AS1	2.13e-06	red	NA
THAP9-AS1	BCAR1P1	1.63e-10	red	red
THAP9-AS1	BDNF	1.02e-08	red	red
THAP9-AS1	BMS1P4	4.3e-05	red	red
THAP9-AS1	BNIP3P15	6.32e-06	red	red
THAP9-AS1	BNIP3P26	9.86e-06	red	red
THAP9-AS1	BNIPL	8.58e-05	red	red
THAP9-AS1	BOLA2P2	6.63e-07	red	red
THAP9-AS1	BRICD5	0.000223	red	red
THAP9-AS1	BSND	2.21e-07	red	red
THAP9-AS1	C10orf53	3.13e-09	red	red
THAP9-AS1	C11orf42	0.006645	red	red
THAP9-AS1	C15orf62	0.001125	red	red
THAP9-AS1	C19orf67	1.21e-06	red	red
THAP9-AS1	C1orf100	3.36e-08	red	red
THAP9-AS1	C1RL.AS1	0.004904	red	NA
THAP9-AS1	C2orf92	0.000772	red	red
THAP9-AS1	C5orf66	0.004352	red	red
THAP9-AS1	C6orf163	0.001247	red	red
THAP9-AS1	CACNA1F	0.000303	red	red
THAP9-AS1	CAPN3	0.002491	red	red
THAP9-AS1	CATSPER2	0.000373	red	red
THAP9-AS1	CCDC13	3.71e-07	red	red
THAP9-AS1	CCDC130	0.000544	red	red
THAP9-AS1	CCDC14	0.004089	red	red
THAP9-AS1	CCDC144B	8.01e-09	red	red
THAP9-AS1	CCDC200	0.000245	red	red
THAP9-AS1	CCDC30	9.61e-05	red	red
THAP9-AS1	CCER2	1.06e-05	red	red
THAP9-AS1	CCNL1	0.000537	red	red
THAP9-AS1	CCNYL6	3.24e-09	red	red
THAP9-AS1	CCT6P3	5.76e-06	red	red
THAP9-AS1	CCZ1P	9.51e-05	red	red
THAP9-AS1	CDK15	4.32e-10	red	red
THAP9-AS1	CDK5P1	4.24e-11	red	red
THAP9-AS1	CDRT4	0.000174	red	red
THAP9-AS1	CEACAM19	0.00104	red	red
THAP9-AS1	CEACAMP7	1.26e-06	red	red
THAP9-AS1	CENATAC	0.001517	red	red
THAP9-AS1	CEP152	0.00452	red	red
THAP9-AS1	CEP95	0.003221	red	red
THAP9-AS1	CFAP44	0.006076	red	red
THAP9-AS1	CFAP70	0.000227	red	red
THAP9-AS1	CHKA	0.000273	red	red
THAP9-AS1	CHKB	6.84e-05	red	red
THAP9-AS1	CHRNG	1.73e-06	red	red
THAP9-AS1	CIR1P1	5.09e-12	red	red
THAP9-AS1	CLBA1	7.02e-08	red	red
THAP9-AS1	CLDN9	3.29e-05	red	red
THAP9-AS1	CLEC18C	3.25e-06	red	red
THAP9-AS1	CLHC1	1.39e-05	red	red
THAP9-AS1	CLUHP3	0.002958	red	red
THAP9-AS1	CNTD1	2.86e-05	red	red
THAP9-AS1	COCH	1.06e-07	red	red
THAP9-AS1	CPT1B	0.00065	red	red
THAP9-AS1	CREBZF	0.018528	red	red
THAP9-AS1	CRYBB3	1.9e-06	red	red
THAP9-AS1	CRYGS	0.000909	red	red
THAP9-AS1	CTAGE7P	0.000767	red	red
THAP9-AS1	CTBP1.AS	0.002289	red	NA
THAP9-AS1	CTBP2P7	8.99e-06	red	red
THAP9-AS1	CYP26C1	5.18e-08	red	red
THAP9-AS1	DCAF4L1	3.21e-06	red	red
THAP9-AS1	DCST1	0.000719	red	red
THAP9-AS1	DDN.AS1	0.000141	red	NA
THAP9-AS1	DDX39B	0.00199	red	red
THAP9-AS1	DDX47	0.000311	red	red
THAP9-AS1	DEFB122	2.44e-11	red	red
THAP9-AS1	DENND2C	1.7e-07	red	red
THAP9-AS1	DMBT1L1	4.36e-07	red	red
THAP9-AS1	DMTF1	0.00707	red	red
THAP9-AS1	DNAH1	0.000619	red	red
THAP9-AS1	DNAH17	0.001004	red	red
THAP9-AS1	DNASE1L2	4.84e-08	red	red
THAP9-AS1	DPP9.AS1	0.000442	red	NA
THAP9-AS1	DPY19L4P2	1.26e-06	red	red
THAP9-AS1	DSCAS	4.84e-09	red	red
THAP9-AS1	DSCR9	9.76e-09	red	red
THAP9-AS1	DUX4L9	3.73e-11	red	red
THAP9-AS1	DYNLT2	0.001228	red	red
THAP9-AS1	EBLN2	0.00037	red	red
THAP9-AS1	ECHDC2	0.000216	red	red
THAP9-AS1	EDRF1.AS1	3.04e-05	red	NA
THAP9-AS1	EEF1A1P26	1.39e-10	red	red
THAP9-AS1	EEF1A1P31	4.73e-06	red	red
THAP9-AS1	EEF1A1P36	2.17e-10	red	red
THAP9-AS1	EEF1B2P7	4.51e-10	red	red
THAP9-AS1	EFCAB10	1.75e-07	red	red
THAP9-AS1	EFCAB14.AS1	8.74e-05	red	NA
THAP9-AS1	EFHC1	0.000172	red	red
THAP9-AS1	EHD4.AS1	1.21e-05	red	NA
THAP9-AS1	EIF1P4	3.17e-11	red	red
THAP9-AS1	EIF4A1	0.000354	red	red
THAP9-AS1	ELMO1.AS1	6.27e-10	red	NA
THAP9-AS1	ELOBP2	7.53e-09	red	red
THAP9-AS1	ENC1	0.000147	red	red
THAP9-AS1	ENPP7P11	0.000661	red	red
THAP9-AS1	EP400P1	0.000375	red	red
THAP9-AS1	EPPIN.WFDC6	1.26e-06	red	NA
THAP9-AS1	ERAS	1.36e-08	red	red
THAP9-AS1	ERVK3.1	0.000459	red	NA
THAP9-AS1	ETDA	2.25e-09	red	red
THAP9-AS1	F3	1.54e-06	red	red
THAP9-AS1	FAM106A	2.51e-10	red	red
THAP9-AS1	FAM111A	0.000226	red	red
THAP9-AS1	FAM118A	0.000404	red	red
THAP9-AS1	FAM13A.AS1	0.000634	red	NA
THAP9-AS1	FAM183A	1.32e-08	red	red
THAP9-AS1	FAM186A	0.000142	red	red
THAP9-AS1	FAM209A	5.92e-06	red	red
THAP9-AS1	FAM209B	3.03e-08	red	red
THAP9-AS1	FAM229A	0.000485	red	red
THAP9-AS1	FAM27E3	1.24e-07	red	red
THAP9-AS1	FAM71F2	1.79e-05	red	red
THAP9-AS1	FAM9B	5.03e-10	red	red
THAP9-AS1	FANCD2OS	1.07e-07	red	red
THAP9-AS1	FAT2	1.87e-05	red	red
THAP9-AS1	FBXO3.DT	1.16e-11	red	NA
THAP9-AS1	FBXW12	1.94e-06	red	red
THAP9-AS1	FER1L4	0.000213	red	red
THAP9-AS1	FLJ20712	3.12e-05	red	red
THAP9-AS1	FLJ33534	3.95e-10	red	red
THAP9-AS1	FLNB.AS1	6.05e-05	red	NA
THAP9-AS1	FNBP4	0.003564	red	red
THAP9-AS1	FSCN2	5.74e-05	red	red
THAP9-AS1	FSCN3	2.55e-07	red	red
THAP9-AS1	FSIP2.AS2	1.64e-06	red	NA
THAP9-AS1	FSTL4	1.09e-07	red	red
THAP9-AS1	GABRE	9.24e-05	red	red
THAP9-AS1	GAPDHP36	1.26e-06	red	red
THAP9-AS1	GAPDHS	6.05e-08	red	red
THAP9-AS1	GAS8.AS1	5.19e-05	red	NA
THAP9-AS1	GCNA	0.000134	red	red
THAP9-AS1	GLI4	9.63e-05	red	red
THAP9-AS1	GLYATL1P1	4.38e-08	red	red
THAP9-AS1	GNRH1	0.003078	red	red
THAP9-AS1	GOLGA2P5	0.00375	red	red
THAP9-AS1	GOLGA6L9	7.05e-05	red	red
THAP9-AS1	GPR199P	1.14e-05	red	red
THAP9-AS1	GPR6	3.8e-08	red	red
THAP9-AS1	GPR75	3.14e-05	red	red
THAP9-AS1	GPS2	0.001216	red	red
THAP9-AS1	GRIN3B	3.4e-06	red	red
THAP9-AS1	GS1.124K5.11	0.001453	red	NA
THAP9-AS1	GTF2H4	2.91e-05	red	red
THAP9-AS1	GYG2P2	1.23e-06	red	red
THAP9-AS1	H2AC18	6.33e-10	red	red
THAP9-AS1	H4C1	4.7e-09	red	red
THAP9-AS1	H4C12	4.41e-09	red	red
THAP9-AS1	HADHAP1	4.15e-09	red	red
THAP9-AS1	HCG25	0.000123	red	red
THAP9-AS1	HDAC10	0.000417	red	red
THAP9-AS1	HERC2P7	0.00062	red	red
THAP9-AS1	HES7	1.39e-08	red	red
THAP9-AS1	HHATL	5.99e-11	red	red
THAP9-AS1	HHATL.AS1	8.04e-07	red	NA
THAP9-AS1	HIGD1AP6	2.85e-09	red	red
THAP9-AS1	HMGB3P27	3.18e-10	red	red
THAP9-AS1	HMGB3P4	1.4e-07	red	red
THAP9-AS1	HMGN1P8	2.35e-06	red	red
THAP9-AS1	HNRNPA1P17	6.11e-05	red	red
THAP9-AS1	HNRNPA1P49	0.000277	red	red
THAP9-AS1	HNRNPH1	0.005652	red	red
THAP9-AS1	HNRNPH1P1	6.66e-06	red	red
THAP9-AS1	HORMAD2	3.09e-09	red	red
THAP9-AS1	HORMAD2.AS1	4.74e-06	red	NA
THAP9-AS1	HRK	3.83e-05	red	red
THAP9-AS1	HS3ST3B1	1.25e-05	red	red
THAP9-AS1	HSPA8P7	3.73e-07	red	red
THAP9-AS1	HTD2	1.96e-05	red	red
THAP9-AS1	HTR2C	1.42e-09	red	red
THAP9-AS1	HYPK	0.001617	red	red
THAP9-AS1	ICE2P2	6.54e-09	red	red
THAP9-AS1	IGF2BP2.AS1	5.78e-07	red	NA
THAP9-AS1	IGHD1.1	1.02e-09	red	NA
THAP9-AS1	IGHD4.17	5.49e-07	red	NA
THAP9-AS1	IGHD5.5	1.88e-08	red	NA
THAP9-AS1	IGHJ2P	5.17e-07	red	red
THAP9-AS1	IGHJ3P	2.34e-05	red	red
THAP9-AS1	IGHVII.78.1	1.12e-05	red	NA
THAP9-AS1	IGKJ5	2.1e-06	red	red
THAP9-AS1	IGLJ7	4.96e-08	red	red
THAP9-AS1	IL36G	2.52e-07	red	red
THAP9-AS1	INE1	0.000543	red	red
THAP9-AS1	INTS6L	0.017817	red	red
THAP9-AS1	IQCN	2.72e-06	red	red
THAP9-AS1	JMJD7.PLA2G4B	0.001792	red	NA
THAP9-AS1	KCNAB3	0.000274	red	red
THAP9-AS1	KCNRG	1.02e-07	red	red
THAP9-AS1	KHDC4	0.010265	red	red
THAP9-AS1	KIAA0895L	0.001996	red	red
THAP9-AS1	KIF26A	6.1e-05	red	red
THAP9-AS1	KLRC4	6.09e-07	red	red
THAP9-AS1	KMT5C	0.000261	red	red
THAP9-AS1	KRT18P29	3.72e-08	red	red
THAP9-AS1	KRT18P43	2.18e-10	red	red
THAP9-AS1	KRT19P3	1.21e-08	red	red
THAP9-AS1	KRT38	6.27e-10	red	red
THAP9-AS1	KRT85	3.13e-09	red	red
THAP9-AS1	KRT8P52	6.29e-08	red	red
THAP9-AS1	KRTAP1.3	1.26e-06	red	NA
THAP9-AS1	KRTAP5.7	1.13e-08	red	NA
THAP9-AS1	KRTAP9.6	5.43e-08	red	NA
THAP9-AS1	L3HYPDH	5.35e-07	red	red
THAP9-AS1	L3MBTL1	3.19e-05	red	red
THAP9-AS1	LAT	2.81e-06	red	red
THAP9-AS1	LBHD1	0.001877	red	red
THAP9-AS1	LENG8.AS1	0.000648	red	NA
THAP9-AS1	LHX1	3.73e-09	red	red
THAP9-AS1	LIME1	0.000197	red	red
THAP9-AS1	LIMS1.AS1	6.35e-07	red	NA
THAP9-AS1	LINC00174	0.000319	red	red
THAP9-AS1	LINC00222	2.62e-08	red	red
THAP9-AS1	LINC00254	1.26e-06	red	red
THAP9-AS1	LINC00314	2.88e-09	red	red
THAP9-AS1	LINC00326	1.26e-06	red	red
THAP9-AS1	LINC00457	7.43e-07	red	red
THAP9-AS1	LINC00494	4.04e-06	red	red
THAP9-AS1	LINC00616	9.77e-11	red	red
THAP9-AS1	LINC00656	1.68e-08	red	red
THAP9-AS1	LINC00894	0.001124	red	red
THAP9-AS1	LINC00917	1.38e-08	red	red
THAP9-AS1	LINC01087	1.76e-08	red	red
THAP9-AS1	LINC01089	0.00343	red	red
THAP9-AS1	LINC01176	0.001626	red	red
THAP9-AS1	LINC01191	7.65e-09	red	red
THAP9-AS1	LINC01252	1.05e-06	red	red
THAP9-AS1	LINC01333	2.61e-08	red	red
THAP9-AS1	LINC01342	0.002115	red	red
THAP9-AS1	LINC01347	0.000332	red	red
THAP9-AS1	LINC01480	4.85e-06	red	red
THAP9-AS1	LINC01500	3.52e-11	red	red
THAP9-AS1	LINC01527	9.79e-11	red	red
THAP9-AS1	LINC01838	1.26e-06	red	red
THAP9-AS1	LINC01845	1.75e-08	red	red
THAP9-AS1	LINC01951	1.26e-06	red	red
THAP9-AS1	LINC02090	1.24e-08	red	red
THAP9-AS1	LINC02102	4.5e-09	red	red
THAP9-AS1	LINC02135	4.17e-11	red	red
THAP9-AS1	LINC02148	2.22e-08	red	red
THAP9-AS1	LINC02247	2.3e-08	red	red
THAP9-AS1	LINC02261	1.12e-08	red	red
THAP9-AS1	LINC02368	9.79e-11	red	red
THAP9-AS1	LINC02421	3.99e-06	red	red
THAP9-AS1	LINC02614	0.001106	red	red
THAP9-AS1	LINC02681	6.88e-11	red	red
THAP9-AS1	LINC02764	3.96e-10	red	red
THAP9-AS1	LINC02774	1.14e-11	red	red
THAP9-AS1	LINC02783	7.15e-11	red	red
THAP9-AS1	LINC02889	1.33e-06	red	red
THAP9-AS1	LIX1L.AS1	2.09e-08	red	NA
THAP9-AS1	LOC100127986	1.82e-07	red	red
THAP9-AS1	LOC100128494	0.000141	red	red
THAP9-AS1	LOC100129422	2.16e-08	red	red
THAP9-AS1	LOC100130550	2.63e-06	red	red
THAP9-AS1	LOC100131348	2.17e-11	red	red
THAP9-AS1	LOC100131465	3.03e-06	red	red
THAP9-AS1	LOC100132172	0.00078	red	red
THAP9-AS1	LOC100288123	0.000644	red	red
THAP9-AS1	LOC100288175	2.94e-05	red	red
THAP9-AS1	LOC100289037	4.26e-10	red	red
THAP9-AS1	LOC100419572	6.5e-06	red	red
THAP9-AS1	LOC100419654	2.41e-09	red	red
THAP9-AS1	LOC100420096	1.77e-06	red	red
THAP9-AS1	LOC100420532	8.1e-08	red	red
THAP9-AS1	LOC100420580	1.08e-06	red	red
THAP9-AS1	LOC100420707	8.62e-10	red	red
THAP9-AS1	LOC100420863	1.92e-07	red	red
THAP9-AS1	LOC100421142	1.26e-06	red	red
THAP9-AS1	LOC100421173	1.56e-07	red	red
THAP9-AS1	LOC100422562	2.19e-07	red	red
THAP9-AS1	LOC100505915	9.05e-10	red	red
THAP9-AS1	LOC100506071	2.7e-07	red	red
THAP9-AS1	LOC100506258	0.001665	red	red
THAP9-AS1	LOC100506282	0.000476	red	red
THAP9-AS1	LOC100506444	8.11e-09	red	red
THAP9-AS1	LOC100507071	1.39e-06	red	red
THAP9-AS1	LOC100507373	3.59e-05	red	red
THAP9-AS1	LOC100507403	5.51e-06	red	red
THAP9-AS1	LOC100507551	0.000147	red	red
THAP9-AS1	LOC100652999	4.03e-06	red	red
THAP9-AS1	LOC101926964	3.22e-08	red	red
THAP9-AS1	LOC101928371	1.27e-06	red	red
THAP9-AS1	LOC101928661	1.26e-06	red	red
THAP9-AS1	LOC101928682	4.97e-09	red	red
THAP9-AS1	LOC101929162	0.000432	red	red
THAP9-AS1	LOC101929240	0.000275	red	red
THAP9-AS1	LOC101929586	1.09e-06	red	red
THAP9-AS1	LOC101929719	7.91e-06	red	red
THAP9-AS1	LOC102723566	3.61e-05	red	red
THAP9-AS1	LOC102723809	0.000677	red	red
THAP9-AS1	LOC102724323	0.000202	red	red
THAP9-AS1	LOC104968399	2.26e-07	red	red
THAP9-AS1	LOC105369332	7.13e-05	red	red
THAP9-AS1	LOC105371824	1.69e-05	red	red
THAP9-AS1	LOC105372143	7.15e-06	red	red
THAP9-AS1	LOC105373416	1.37e-06	red	red
THAP9-AS1	LOC105378721	1.38e-05	red	red
THAP9-AS1	LOC107986032	9.37e-06	red	red
THAP9-AS1	LOC107986163	4.43e-09	red	red
THAP9-AS1	LOC107986453	2.84e-06	red	red
THAP9-AS1	LOC107987035	1.26e-06	red	red
THAP9-AS1	LOC114841040	2.79e-11	red	red
THAP9-AS1	LOC220729	0.008838	red	red
THAP9-AS1	LOC285593	1.18e-11	red	red
THAP9-AS1	LOC285638	7.83e-08	red	red
THAP9-AS1	LOC391798	4.55e-10	red	red
THAP9-AS1	LOC401913	8.48e-06	red	red
THAP9-AS1	LOC442041	6.59e-05	red	red
THAP9-AS1	LOC643201	1.81e-05	red	red
THAP9-AS1	LOC644656	9.53e-05	red	red
THAP9-AS1	LOC646588	7.07e-07	red	red
THAP9-AS1	LRIT3	2.83e-06	red	red
THAP9-AS1	LRP5L	0.001867	red	red
THAP9-AS1	LRRC69	0.000328	red	red
THAP9-AS1	LTB4R	0.00017	red	red
THAP9-AS1	LTB4R2	0.000469	red	red
THAP9-AS1	LTO1	0.003134	red	red
THAP9-AS1	LUC7L	0.000788	red	red
THAP9-AS1	LY6G5B	0.000533	red	red
THAP9-AS1	LYG1	5.26e-06	red	red
THAP9-AS1	MAGEB17	1.44e-06	red	red
THAP9-AS1	MALAT1	0.000772	red	red
THAP9-AS1	MAN2C1	0.000387	red	red
THAP9-AS1	MANEALP1	3.97e-06	red	red
THAP9-AS1	MAPK15	0.000139	red	red
THAP9-AS1	MAPK8IP3	0.000582	red	red
THAP9-AS1	MARK3P1	1.43e-09	red	red
THAP9-AS1	MASP2	0.000252	red	red
THAP9-AS1	MATN1	6.67e-08	red	red
THAP9-AS1	MATN1.AS1	9.18e-06	red	NA
THAP9-AS1	MC1R	2.28e-05	red	red
THAP9-AS1	MCM3AP.AS1	0.006124	red	NA
THAP9-AS1	MDM4	0.00434	red	red
THAP9-AS1	MEG9	1.67e-07	red	red
THAP9-AS1	METTL27	4.81e-10	red	red
THAP9-AS1	MFN1P1	1.86e-08	red	red
THAP9-AS1	MHENCR	0.000762	red	red
THAP9-AS1	MICA	4.81e-08	red	red
THAP9-AS1	MINAR1	0.000123	red	red
THAP9-AS1	MIR10B	2.04e-08	red	red
THAP9-AS1	MIR1180	7.51e-12	red	red
THAP9-AS1	MIR1266	3.9e-10	red	red
THAP9-AS1	MIR148B	9.43e-10	red	red
THAP9-AS1	MIR17HG	4.32e-05	red	red
THAP9-AS1	MIR1827	2.84e-07	red	red
THAP9-AS1	MIR186	2.51e-05	red	red
THAP9-AS1	MIR190A	1.26e-06	red	red
THAP9-AS1	MIR199A1	3.27e-08	red	red
THAP9-AS1	MIR200A	0.000231	red	red
THAP9-AS1	MIR200B	2.23e-05	red	red
THAP9-AS1	MIR210	1.67e-07	red	red
THAP9-AS1	MIR26A1	1.37e-09	red	red
THAP9-AS1	MIR26B	1.57e-08	red	red
THAP9-AS1	MIR27B	3.68e-09	red	red
THAP9-AS1	MIR30C1	2.05e-07	red	red
THAP9-AS1	MIR3127	4.19e-07	red	red
THAP9-AS1	MIR3186	3.92e-08	red	red
THAP9-AS1	MIR3192	4e-07	red	red
THAP9-AS1	MIR3194	1.26e-06	red	red
THAP9-AS1	MIR324	5.86e-08	red	red
THAP9-AS1	MIR3657	2.16e-08	red	red
THAP9-AS1	MIR3685	1.76e-08	red	red
THAP9-AS1	MIR3690	7.35e-09	red	red
THAP9-AS1	MIR378A	1.96e-07	red	red
THAP9-AS1	MIR378J	1.13e-07	red	red
THAP9-AS1	MIR3936	0.000125	red	red
THAP9-AS1	MIR3936HG	0.001941	red	red
THAP9-AS1	MIR3942	5.01e-08	red	red
THAP9-AS1	MIR410	1.96e-06	red	red
THAP9-AS1	MIR4258	9.05e-07	red	red
THAP9-AS1	MIR429	0.000496	red	red
THAP9-AS1	MIR4300HG	1.82e-07	red	red
THAP9-AS1	MIR4324	4.58e-07	red	red
THAP9-AS1	MIR4326	7.86e-07	red	red
THAP9-AS1	MIR4427	8.13e-06	red	red
THAP9-AS1	MIR4498	1.26e-06	red	red
THAP9-AS1	MIR4507	1.26e-09	red	red
THAP9-AS1	MIR4512	1.43e-06	red	red
THAP9-AS1	MIR4537	2.67e-05	red	red
THAP9-AS1	MIR4538	8.73e-07	red	red
THAP9-AS1	MIR4539	1.08e-06	red	red
THAP9-AS1	MIR4639	3.54e-07	red	red
THAP9-AS1	MIR4668	6.15e-10	red	red
THAP9-AS1	MIR4669	1.26e-06	red	red
THAP9-AS1	MIR4752	1.26e-06	red	red
THAP9-AS1	MIR548O	1.81e-10	red	red
THAP9-AS1	MIR5588	1.26e-06	red	red
THAP9-AS1	MIR559	0.001272	red	red
THAP9-AS1	MIR590	5.17e-05	red	red
THAP9-AS1	MIR600HG	8.59e-05	red	red
THAP9-AS1	MIR608	2.6e-07	red	red
THAP9-AS1	MIR616	2.91e-07	red	red
THAP9-AS1	MIR634	1.26e-06	red	red
THAP9-AS1	MIR647	0.000598	red	red
THAP9-AS1	MIR6739	6.57e-07	red	red
THAP9-AS1	MIR6753	3.87e-06	red	red
THAP9-AS1	MIR6757	1.59e-11	red	red
THAP9-AS1	MIR6763	5.58e-07	red	red
THAP9-AS1	MIR6776	2.26e-06	red	red
THAP9-AS1	MIR6801	3.8e-08	red	red
THAP9-AS1	MIR6814	6e-07	red	red
THAP9-AS1	MIR6819	3.3e-06	red	red
THAP9-AS1	MIR6859.1	2.51e-08	red	NA
THAP9-AS1	MIR6859.4	2.14e-08	red	NA
THAP9-AS1	MIR6864	7.74e-08	red	red
THAP9-AS1	MIR6867	3.32e-07	red	red
THAP9-AS1	MIR765	9.73e-07	red	red
THAP9-AS1	MIR920	1.39e-09	red	red
THAP9-AS1	MIRLET7D	6.99e-06	red	red
THAP9-AS1	MKNK1.AS1	0.003056	red	NA
THAP9-AS1	MKRN7P	1.37e-08	red	red
THAP9-AS1	MRI1	9.54e-06	red	red
THAP9-AS1	MROH3P	5.22e-09	red	red
THAP9-AS1	MROH5	2.33e-06	red	red
THAP9-AS1	MROH7	4.3e-05	red	red
THAP9-AS1	MRPL40P1	2.36e-08	red	red
THAP9-AS1	MRPL53	0.000518	red	red
THAP9-AS1	MRPS21P5	1.26e-06	red	red
THAP9-AS1	MRPS31P5	0.000969	red	red
THAP9-AS1	MSANTD2	0.00356	red	red
THAP9-AS1	MSH2.OT1	3.53e-08	red	NA
THAP9-AS1	MSH5	0.001494	red	red
THAP9-AS1	MSS51	0.000255	red	red
THAP9-AS1	MTCO1P22	2e-07	red	red
THAP9-AS1	MTCO1P23	1.92e-10	red	red
THAP9-AS1	MTCO1P28	1.06e-10	red	red
THAP9-AS1	MTCO1P45	1.34e-08	red	red
THAP9-AS1	MTCO1P46	6.03e-10	red	red
THAP9-AS1	MTCO1P49	3.13e-09	red	red
THAP9-AS1	MTCO2P21	1.54e-08	red	red
THAP9-AS1	MTCO3P11	2.19e-07	red	red
THAP9-AS1	MTCO3P13	1.1e-08	red	red
THAP9-AS1	MTCO3P15	3.13e-09	red	red
THAP9-AS1	MTCO3P27	1.11e-10	red	red
THAP9-AS1	MTCP1	6.59e-05	red	red
THAP9-AS1	MTCYBP32	2.28e-08	red	red
THAP9-AS1	MTCYBP33	1.26e-06	red	red
THAP9-AS1	MTCYBP35	9.77e-06	red	red
THAP9-AS1	MTCYBP38	1.26e-06	red	red
THAP9-AS1	MTG1	7.62e-05	red	red
THAP9-AS1	MTND1P18	1.6e-09	red	red
THAP9-AS1	MTND1P36	1.26e-06	red	red
THAP9-AS1	MTND1P9	4.97e-10	red	red
THAP9-AS1	MTND2P16	2.7e-08	red	red
THAP9-AS1	MTND2P29	3.47e-07	red	red
THAP9-AS1	MTND2P40	2.11e-06	red	red
THAP9-AS1	MTND3P5	3.5e-06	red	red
THAP9-AS1	MTND4P15	2.4e-08	red	red
THAP9-AS1	MTND4P18	1.26e-06	red	red
THAP9-AS1	MTND4P2	1.26e-06	red	red
THAP9-AS1	MTND4P23	1.81e-06	red	red
THAP9-AS1	MTND4P9	2.34e-06	red	red
THAP9-AS1	MTND5P14	1.46e-07	red	red
THAP9-AS1	MTND5P23	1.26e-06	red	red
THAP9-AS1	MTND5P8	6.61e-12	red	red
THAP9-AS1	MTND6P12	4.85e-12	red	red
THAP9-AS1	MTRNR2L11	1.09e-10	red	red
THAP9-AS1	MUC6	8.84e-07	red	red
THAP9-AS1	MYCBPAP	1.88e-07	red	red
THAP9-AS1	MYMK	7.34e-12	red	red
THAP9-AS1	MYSM1	0.007529	red	red
THAP9-AS1	N4BP2L2.IT2	0.000671	red	NA
THAP9-AS1	NAMA	6.12e-10	red	red
THAP9-AS1	NAMPTP3	3.97e-08	red	red
THAP9-AS1	NBPF11	0.002481	red	red
THAP9-AS1	NBPF3	1.42e-07	red	red
THAP9-AS1	NCBP2.AS1	0.000473	red	NA
THAP9-AS1	NDUFB4P6	2.71e-08	red	red
THAP9-AS1	NDUFS5P2	1.26e-06	red	red
THAP9-AS1	NDUFV2.AS1	1.81e-05	red	NA
THAP9-AS1	NEAT1	5.95e-05	red	red
THAP9-AS1	NEIL1	0.002749	red	red
THAP9-AS1	NIFKP8	1.26e-06	red	red
THAP9-AS1	NKTR	0.003025	red	red
THAP9-AS1	NOL12	0.00086	red	red
THAP9-AS1	NOS2P3	4.78e-11	red	red
THAP9-AS1	NOTO	8.24e-08	red	red
THAP9-AS1	NPHP3	4.28e-05	red	red
THAP9-AS1	NPIPA8	1.05e-10	red	red
THAP9-AS1	NPIPB11	0.000324	red	red
THAP9-AS1	NPIPB14P	0.000278	red	red
THAP9-AS1	NPIPB4	0.000147	red	red
THAP9-AS1	NPIPB6	4.76e-08	red	red
THAP9-AS1	NPY4R2	2.29e-09	red	red
THAP9-AS1	NSUN5P2	0.000671	red	red
THAP9-AS1	NTRK3.AS1	2.27e-07	red	NA
THAP9-AS1	NUTM1	8.1e-05	red	red
THAP9-AS1	NXPE2P1	8.68e-08	red	red
THAP9-AS1	OBP2B	1.07e-05	red	red
THAP9-AS1	OBSCN	4.55e-06	red	red
THAP9-AS1	OFD1P4Y	1.26e-06	red	red
THAP9-AS1	OGT	0.012412	red	red
THAP9-AS1	OPN4	1.76e-07	red	red
THAP9-AS1	OR10D1P	1.1e-07	red	red
THAP9-AS1	OR10G2	3.17e-09	red	red
THAP9-AS1	OR10G6	1.27e-06	red	red
THAP9-AS1	OR10G8	1.7e-09	red	red
THAP9-AS1	OR10V2P	3.47e-07	red	red
THAP9-AS1	OR11A1	9.79e-11	red	red
THAP9-AS1	OR13C7	2.7e-11	red	red
THAP9-AS1	OR2AI1P	1.26e-06	red	red
THAP9-AS1	OR2H1	1.04e-07	red	red
THAP9-AS1	OR2S2	1.27e-07	red	red
THAP9-AS1	OR4A13P	1.26e-06	red	red
THAP9-AS1	OR4V1P	1.26e-06	red	red
THAP9-AS1	OR51Q1	1.19e-11	red	red
THAP9-AS1	OR52E4	1.26e-06	red	red
THAP9-AS1	OR52E5	2.84e-07	red	red
THAP9-AS1	OR52P1P	3.97e-07	red	red
THAP9-AS1	OR52V1P	1.38e-09	red	red
THAP9-AS1	OR6B3	1.26e-06	red	red
THAP9-AS1	OR6J1	2.61e-08	red	red
THAP9-AS1	OR6M3P	2.61e-08	red	red
THAP9-AS1	OR7E106P	9.79e-11	red	red
THAP9-AS1	OR7E128P	0.001885	red	red
THAP9-AS1	OR7E163P	1.26e-06	red	red
THAP9-AS1	ORAOV1P1	3.66e-06	red	red
THAP9-AS1	OTUD3	0.000217	red	red
THAP9-AS1	PADI3	2.29e-08	red	red
THAP9-AS1	PAIP1P1	3.55e-05	red	red
THAP9-AS1	PAXBP1	0.000139	red	red
THAP9-AS1	PBX4	9.41e-05	red	red
THAP9-AS1	PCDH19	0.000204	red	red
THAP9-AS1	PCDHA7	9.9e-12	red	red
THAP9-AS1	PCP2	4.4e-07	red	red
THAP9-AS1	PDE4DIPP6	9.24e-06	red	red
THAP9-AS1	PDE6C	4.51e-06	red	red
THAP9-AS1	PDLIM1P4	1.78e-08	red	red
THAP9-AS1	PER2	9.92e-05	red	red
THAP9-AS1	PHBP9	3.37e-05	red	red
THAP9-AS1	PHOSPHO1	6e-07	red	red
THAP9-AS1	PI4KAP1	3.24e-08	red	red
THAP9-AS1	PIGL	0.002982	red	red
THAP9-AS1	PIK3R6	3.36e-06	red	red
THAP9-AS1	PKD1P2	8.38e-07	red	red
THAP9-AS1	PKP4.AS1	4.42e-07	red	NA
THAP9-AS1	PLAC8L1	4.96e-05	red	red
THAP9-AS1	PLAC9P1	2.15e-08	red	red
THAP9-AS1	PLEKHG5	3.96e-06	red	red
THAP9-AS1	PLEKHH1	0.00652	red	red
THAP9-AS1	PLSCR3	4.54e-08	red	red
THAP9-AS1	PMFBP1	0.004113	red	red
THAP9-AS1	PMS2CL	0.000106	red	red
THAP9-AS1	PMS2P3	2.32e-05	red	red
THAP9-AS1	PNISR	0.000259	red	red
THAP9-AS1	POLN	9.36e-08	red	red
THAP9-AS1	PPIAL4E	1.16e-11	red	red
THAP9-AS1	PPIAP46	9.58e-08	red	red
THAP9-AS1	PPIAP50	1.01e-10	red	red
THAP9-AS1	PPP1R10P1	1.26e-06	red	red
THAP9-AS1	PPP1R32	3.11e-06	red	red
THAP9-AS1	PPP2R5CP	4.2e-09	red	red
THAP9-AS1	PPP3CB.AS1	0.000369	red	NA
THAP9-AS1	PRDX3P3	1.26e-06	red	red
THAP9-AS1	PRH1	1.92e-05	red	red
THAP9-AS1	PRICKLE4	1.34e-05	red	red
THAP9-AS1	PRKCZ.AS1	2.07e-05	red	NA
THAP9-AS1	PRLH	3.25e-06	red	red
THAP9-AS1	PRMT5.AS1	0.000114	red	NA
THAP9-AS1	PROCA1	8.88e-05	red	red
THAP9-AS1	PRPF39	0.000681	red	red
THAP9-AS1	PRR5.ARHGAP8	0.000875	red	NA
THAP9-AS1	PSMA3.AS1	0.005369	red	NA
THAP9-AS1	PWRN2	1.63e-09	red	red
THAP9-AS1	R3HDML	0.00149	red	red
THAP9-AS1	RAD21P1	1.25e-09	red	red
THAP9-AS1	RAD51.AS1	0.001251	red	NA
THAP9-AS1	RBM39P1	3.07e-08	red	red
THAP9-AS1	REELD1	7.78e-08	red	red
THAP9-AS1	RFPL3S	7.88e-07	red	red
THAP9-AS1	RGPD8	3.34e-10	red	red
THAP9-AS1	RGSL1	1.53e-06	red	red
THAP9-AS1	RHEX	6.21e-07	red	red
THAP9-AS1	RN7SKP103	1.26e-06	red	red
THAP9-AS1	RN7SKP127	9.74e-06	red	red
THAP9-AS1	RN7SKP23	1.24e-05	red	red
THAP9-AS1	RN7SKP275	3.43e-10	red	red
THAP9-AS1	RN7SKP285	4.91e-11	red	red
THAP9-AS1	RN7SKP287	2.79e-11	red	red
THAP9-AS1	RN7SKP70	1.54e-05	red	red
THAP9-AS1	RN7SL122P	2.25e-07	red	red
THAP9-AS1	RN7SL125P	1.04e-06	red	red
THAP9-AS1	RN7SL146P	1.77e-07	red	red
THAP9-AS1	RN7SL159P	1.26e-06	red	red
THAP9-AS1	RN7SL192P	2.59e-05	red	red
THAP9-AS1	RN7SL268P	4.69e-05	red	red
THAP9-AS1	RN7SL320P	5.01e-08	red	red
THAP9-AS1	RN7SL333P	2.68e-05	red	red
THAP9-AS1	RN7SL33P	1.36e-11	red	red
THAP9-AS1	RN7SL382P	4.44e-12	red	red
THAP9-AS1	RN7SL392P	1.26e-06	red	red
THAP9-AS1	RN7SL441P	1.01e-06	red	red
THAP9-AS1	RN7SL481P	1.27e-07	red	red
THAP9-AS1	RN7SL493P	3.4e-09	red	red
THAP9-AS1	RN7SL49P	7.76e-06	red	red
THAP9-AS1	RN7SL535P	1.28e-06	red	red
THAP9-AS1	RN7SL574P	2.65e-10	red	red
THAP9-AS1	RN7SL608P	9.58e-05	red	red
THAP9-AS1	RN7SL612P	1.37e-12	red	red
THAP9-AS1	RN7SL650P	4.65e-06	red	red
THAP9-AS1	RN7SL684P	8.14e-06	red	red
THAP9-AS1	RN7SL688P	2.98e-09	red	red
THAP9-AS1	RN7SL702P	2.28e-08	red	red
THAP9-AS1	RN7SL728P	0.000126	red	red
THAP9-AS1	RN7SL744P	6.95e-07	red	red
THAP9-AS1	RN7SL788P	2.24e-11	red	red
THAP9-AS1	RN7SL789P	7.34e-10	red	red
THAP9-AS1	RN7SL809P	1.49e-05	red	red
THAP9-AS1	RN7SL822P	1.26e-06	red	red
THAP9-AS1	RN7SL834P	3.06e-05	red	red
THAP9-AS1	RN7SL93P	2.84e-07	red	red
THAP9-AS1	RNA5SP104	1.26e-06	red	red
THAP9-AS1	RNA5SP20	1.26e-06	red	red
THAP9-AS1	RNA5SP217	4.17e-09	red	red
THAP9-AS1	RNA5SP289	1.26e-06	red	red
THAP9-AS1	RNA5SP324	3.69e-11	red	red
THAP9-AS1	RNA5SP37	0.000101	red	red
THAP9-AS1	RNA5SP371	1.26e-06	red	red
THAP9-AS1	RNA5SP383	2.37e-06	red	red
THAP9-AS1	RNA5SP82	0.000279	red	red
THAP9-AS1	RNA5SP97	4.99e-06	red	red
THAP9-AS1	RNF139.AS1	0.000183	red	NA
THAP9-AS1	RNF166	4.63e-07	red	red
THAP9-AS1	RNF225	6.62e-09	red	red
THAP9-AS1	RNU1.103P	1.27e-06	red	NA
THAP9-AS1	RNU1.132P	2.28e-08	red	NA
THAP9-AS1	RNU2.27P	3.75e-07	red	NA
THAP9-AS1	RNU4.21P	8.04e-08	red	NA
THAP9-AS1	RNU4.39P	2.9e-09	red	NA
THAP9-AS1	RNU4.61P	1.26e-06	red	NA
THAP9-AS1	RNU4.78P	5.97e-07	red	NA
THAP9-AS1	RNU4.82P	3.36e-06	red	NA
THAP9-AS1	RNU5A.3P	1.71e-12	red	NA
THAP9-AS1	RNU6.1011P	7.93e-11	red	NA
THAP9-AS1	RNU6.1053P	6.3e-06	red	NA
THAP9-AS1	RNU6.1065P	6.49e-05	red	NA
THAP9-AS1	RNU6.106P	1.26e-06	red	NA
THAP9-AS1	RNU6.1152P	1.26e-06	red	NA
THAP9-AS1	RNU6.1280P	1.77e-06	red	NA
THAP9-AS1	RNU6.172P	1.26e-06	red	NA
THAP9-AS1	RNU6.176P	1.92e-07	red	NA
THAP9-AS1	RNU6.237P	2.41e-07	red	NA
THAP9-AS1	RNU6.254P	1.95e-10	red	NA
THAP9-AS1	RNU6.312P	7.53e-05	red	NA
THAP9-AS1	RNU6.32P	5.12e-08	red	NA
THAP9-AS1	RNU6.378P	2.68e-07	red	NA
THAP9-AS1	RNU6.418P	3.37e-05	red	NA
THAP9-AS1	RNU6.431P	1.89e-07	red	NA
THAP9-AS1	RNU6.509P	4.7e-08	red	NA
THAP9-AS1	RNU6.57P	2.28e-08	red	NA
THAP9-AS1	RNU6.665P	1.21e-10	red	NA
THAP9-AS1	RNU6.727P	1.26e-06	red	NA
THAP9-AS1	RNU6.766P	2.82e-07	red	NA
THAP9-AS1	RNU6.780P	2.39e-10	red	NA
THAP9-AS1	RNU6.807P	5.12e-07	red	NA
THAP9-AS1	RNU6.88P	2.2e-08	red	NA
THAP9-AS1	RNU6.979P	1.26e-06	red	NA
THAP9-AS1	RNU6ATAC18P	2.68e-07	red	red
THAP9-AS1	RNU7.124P	1.26e-06	red	NA
THAP9-AS1	RNU7.140P	2.61e-06	red	NA
THAP9-AS1	RNU7.195P	1.26e-06	red	NA
THAP9-AS1	RNU7.40P	1.3e-07	red	NA
THAP9-AS1	RNU7.54P	8.75e-07	red	NA
THAP9-AS1	RNY4P10	1.92e-05	red	red
THAP9-AS1	RPL10AP3	1.78e-08	red	red
THAP9-AS1	RPL11P1	1.86e-06	red	red
THAP9-AS1	RPL15P1	1.19e-11	red	red
THAP9-AS1	RPL17P9	7.92e-07	red	red
THAP9-AS1	RPL18AP8	1.25e-09	red	red
THAP9-AS1	RPL18P12	9.81e-10	red	red
THAP9-AS1	RPL18P3	2.15e-11	red	red
THAP9-AS1	RPL18P8	1.23e-09	red	red
THAP9-AS1	RPL21P125	5.61e-07	red	red
THAP9-AS1	RPL21P95	2.58e-06	red	red
THAP9-AS1	RPL22P2	2.17e-06	red	red
THAP9-AS1	RPL22P7	5.55e-10	red	red
THAP9-AS1	RPL23AP15	1.46e-08	red	red
THAP9-AS1	RPL23AP16	3.7e-11	red	red
THAP9-AS1	RPL23AP6	4.99e-08	red	red
THAP9-AS1	RPL23AP91	2.28e-11	red	red
THAP9-AS1	RPL23AP92	4.28e-10	red	red
THAP9-AS1	RPL26P25	8.24e-13	red	red
THAP9-AS1	RPL28P2	1.69e-05	red	red
THAP9-AS1	RPL30P10	1.38e-08	red	red
THAP9-AS1	RPL31P27	3.13e-10	red	red
THAP9-AS1	RPL31P32	1.26e-06	red	red
THAP9-AS1	RPL31P35	1.08e-09	red	red
THAP9-AS1	RPL31P37	1.02e-08	red	red
THAP9-AS1	RPL31P8	1.26e-06	red	red
THAP9-AS1	RPL32P25	1.93e-07	red	red
THAP9-AS1	RPL34P3	1.26e-06	red	red
THAP9-AS1	RPL34P32	5.41e-11	red	red
THAP9-AS1	RPL34P35	1.26e-06	red	red
THAP9-AS1	RPL36P11	5.77e-09	red	red
THAP9-AS1	RPL37P1	3.44e-07	red	red
THAP9-AS1	RPL37P5	2.51e-11	red	red
THAP9-AS1	RPL5P30	2.83e-08	red	red
THAP9-AS1	RPL5P33	1.35e-08	red	red
THAP9-AS1	RPL7AP55	3.6e-08	red	red
THAP9-AS1	RPL7P54	8.65e-09	red	red
THAP9-AS1	RPL8P5	6.2e-06	red	red
THAP9-AS1	RPL9P15	1.15e-08	red	red
THAP9-AS1	RPS10P6	5.03e-08	red	red
THAP9-AS1	RPS12P7	2.42e-10	red	red
THAP9-AS1	RPS13P8	5.22e-09	red	red
THAP9-AS1	RPS15AP20	1.04e-09	red	red
THAP9-AS1	RPS15AP21	6.27e-10	red	red
THAP9-AS1	RPS15AP5	8.92e-12	red	red
THAP9-AS1	RPS17P12	1.26e-06	red	red
THAP9-AS1	RPS17P3	1.09e-10	red	red
THAP9-AS1	RPS20P33	2.09e-05	red	red
THAP9-AS1	RPS23P9	2.3e-10	red	red
THAP9-AS1	RPS27AP15	4.15e-08	red	red
THAP9-AS1	RPS2P13	1.31e-06	red	red
THAP9-AS1	RPS4XP20	3.39e-08	red	red
THAP9-AS1	RPS6P16	3.1e-08	red	red
THAP9-AS1	RPS6P22	2.91e-06	red	red
THAP9-AS1	RPS8P3	1.21e-10	red	red
THAP9-AS1	RPSAP53	2.7e-09	red	red
THAP9-AS1	RPSAP63	2.91e-11	red	red
THAP9-AS1	RSKR	0.002065	red	red
THAP9-AS1	RSRP1	0.015159	red	red
THAP9-AS1	RTEL1P1	1.99e-06	red	red
THAP9-AS1	RUSC1.AS1	0.000745	red	NA
THAP9-AS1	S100A11P5	1.26e-06	red	red
THAP9-AS1	SAP25	4.4e-05	red	red
THAP9-AS1	SAPCD1	0.000202	red	red
THAP9-AS1	SBF1P1	8.92e-13	red	red
THAP9-AS1	SCARF1	3.71e-05	red	red
THAP9-AS1	SCARNA12	2.87e-05	red	red
THAP9-AS1	SCG5.AS1	1.38e-07	red	NA
THAP9-AS1	SCGB3A2	2.62e-09	red	red
THAP9-AS1	SCUBE1.AS1	4.51e-09	red	NA
THAP9-AS1	SDCBP2.AS1	0.00013	red	NA
THAP9-AS1	SDHAP2	0.000724	red	red
THAP9-AS1	SEC61A2	1.07e-05	red	red
THAP9-AS1	SEMA3F.AS1	0.000994	red	NA
THAP9-AS1	SEPTIN7P2	5.8e-05	red	red
THAP9-AS1	SETD4	0.00021	red	red
THAP9-AS1	SH3BP5.AS1	8.01e-05	red	NA
THAP9-AS1	SH3PXD2A.AS1	7.28e-11	red	NA
THAP9-AS1	SH3TC1	0.000649	red	red
THAP9-AS1	SIGLEC6	2.01e-06	red	red
THAP9-AS1	SLC22A15	0.000381	red	red
THAP9-AS1	SLC22A20P	9.29e-08	red	red
THAP9-AS1	SLC22A25	2.3e-08	red	red
THAP9-AS1	SLC29A4	1.91e-06	red	red
THAP9-AS1	SLC35F3	4.67e-11	red	red
THAP9-AS1	SLC36A3	5.46e-12	red	red
THAP9-AS1	SLC6A7	0.002098	red	red
THAP9-AS1	SLC9A5	0.000864	red	red
THAP9-AS1	SLC9C1	5.01e-05	red	red
THAP9-AS1	SLX1A	5.17e-09	red	red
THAP9-AS1	SLX1A.SULT1A3	3.42e-05	red	NA
THAP9-AS1	SMC4P1	1.26e-06	red	red
THAP9-AS1	SMG1P3	0.000221	red	red
THAP9-AS1	SMG1P5	1.42e-08	red	red
THAP9-AS1	SMPD4BP	0.000508	red	red
THAP9-AS1	SNAI3.AS1	2.46e-07	red	NA
THAP9-AS1	SND1.IT1	5.57e-06	red	NA
THAP9-AS1	SNHG1	4.14e-05	red	red
THAP9-AS1	SNHG12	0.000267	red	red
THAP9-AS1	SNHG20	0.000993	red	red
THAP9-AS1	SNORA11F	1.68e-06	red	red
THAP9-AS1	SNORA16B	5.86e-07	red	red
THAP9-AS1	SNORA1B	1.26e-06	red	red
THAP9-AS1	SNORA22C	1.56e-06	red	red
THAP9-AS1	SNORA26	3.64e-06	red	red
THAP9-AS1	SNORA31	4.36e-05	red	red
THAP9-AS1	SNORA33	2.68e-05	red	red
THAP9-AS1	SNORA36B	2.32e-07	red	red
THAP9-AS1	SNORA53	0.000838	red	red
THAP9-AS1	SNORA55	2.52e-05	red	red
THAP9-AS1	SNORA5A	1.02e-05	red	red
THAP9-AS1	SNORA60	4.42e-08	red	red
THAP9-AS1	SNORA69	3.06e-09	red	red
THAP9-AS1	SNORA71A	5.95e-08	red	red
THAP9-AS1	SNORA73B	6.23e-05	red	red
THAP9-AS1	SNORA75	4.14e-07	red	red
THAP9-AS1	SNORA7B	2.69e-07	red	red
THAP9-AS1	SNORD101	8.4e-07	red	red
THAP9-AS1	SNORD117	1.01e-05	red	red
THAP9-AS1	SNORD13P1	6.27e-12	red	red
THAP9-AS1	SNORD19C	1.55e-05	red	red
THAP9-AS1	SNORD37	5.25e-05	red	red
THAP9-AS1	SNORD38A	1.01e-09	red	red
THAP9-AS1	SNORD46	4.53e-05	red	red
THAP9-AS1	SNORD53	1e-06	red	red
THAP9-AS1	SNORD59A	8.96e-05	red	red
THAP9-AS1	SNORD6	3.49e-06	red	red
THAP9-AS1	SNORD63B	2.03e-05	red	red
THAP9-AS1	SNORD69	9.22e-06	red	red
THAP9-AS1	SNORD83A	8.92e-05	red	red
THAP9-AS1	SNORD89	3.21e-05	red	red
THAP9-AS1	SNORD94	0.000135	red	red
THAP9-AS1	SNRPCP11	6.16e-08	red	red
THAP9-AS1	SNRPGP14	6.93e-06	red	red
THAP9-AS1	SNX15	0.000748	red	red
THAP9-AS1	SPACA4	0.001129	red	red
THAP9-AS1	SPATA9	1.74e-07	red	red
THAP9-AS1	SPDYA	9.32e-05	red	red
THAP9-AS1	SPINK7	1.67e-06	red	red
THAP9-AS1	SQSTM1P1	1.26e-06	red	red
THAP9-AS1	SRRM2.AS1	0.000204	red	NA
THAP9-AS1	SSBP3.AS1	0.002502	red	NA
THAP9-AS1	SSU72P1	8.03e-12	red	red
THAP9-AS1	SSX2	1.26e-06	red	red
THAP9-AS1	STAG3L5P	0.000773	red	red
THAP9-AS1	STARD4.AS1	8.78e-06	red	NA
THAP9-AS1	STX18P1	4.89e-08	red	red
THAP9-AS1	SYCP2	3.67e-05	red	red
THAP9-AS1	SYCP2L	4.11e-12	red	red
THAP9-AS1	SYT2	2.39e-05	red	red
THAP9-AS1	SZT2.AS1	1.04e-09	red	NA
THAP9-AS1	TAB3P1	4.13e-10	red	red
THAP9-AS1	TAC4	3.73e-06	red	red
THAP9-AS1	TACR3	3.04e-07	red	red
THAP9-AS1	TAF1D	0.000828	red	red
THAP9-AS1	TARDBPP2	1.32e-07	red	red
THAP9-AS1	TAS2R4	0.000246	red	red
THAP9-AS1	TAS2R5	0.000481	red	red
THAP9-AS1	TAS2R50	1.32e-06	red	red
THAP9-AS1	TAS2R8	1.86e-06	red	red
THAP9-AS1	TBC1D3K	3.35e-11	red	red
THAP9-AS1	TBILA	0.002363	red	red
THAP9-AS1	TBRG1	0.00063	red	red
THAP9-AS1	TEN1.CDK3	0.000526	red	NA
THAP9-AS1	TEPSIN	0.00147	red	red
THAP9-AS1	TERB2	4.12e-08	red	red
THAP9-AS1	TGM1	3.92e-05	red	red
THAP9-AS1	TH2LCRR	5.01e-05	red	red
THAP9-AS1	THAP12P5	8.47e-09	red	red
THAP9-AS1	THAP9.AS1	1	red	NA
THAP9-AS1	THUMPD3.AS1	0.002943	red	NA
THAP9-AS1	TIA1	6.16e-05	red	red
THAP9-AS1	TIAF1	0.000904	red	red
THAP9-AS1	TLR9	7.58e-06	red	red
THAP9-AS1	TMCO2	2.82e-10	red	red
THAP9-AS1	TMEM147.AS1	0.000994	red	NA
THAP9-AS1	TMEM198B	0.00056	red	red
THAP9-AS1	TMEM246.AS1	6.25e-07	red	NA
THAP9-AS1	TMEM262	0.000826	red	red
THAP9-AS1	TMEM266	9.75e-05	red	red
THAP9-AS1	TMEM31	2.05e-08	red	red
THAP9-AS1	TMEM89	0.000176	red	red
THAP9-AS1	TMPRSS9	2.58e-08	red	red
THAP9-AS1	TPMTP3	3.16e-10	red	red
THAP9-AS1	TRAV28	8.52e-08	red	red
THAP9-AS1	TRAV9.1	1.26e-06	red	NA
THAP9-AS1	TRHR	8.32e-09	red	red
THAP9-AS1	TRIM64FP	3.15e-10	red	red
THAP9-AS1	TRPC5	3.45e-11	red	red
THAP9-AS1	TRPC6P	2.56e-07	red	red
THAP9-AS1	TRPV1	0.000167	red	red
THAP9-AS1	TSSK4	0.000331	red	red
THAP9-AS1	TTC21A	0.001461	red	red
THAP9-AS1	TTC34	1.06e-05	red	red
THAP9-AS1	TTC6	0.000743	red	red
THAP9-AS1	TTN.AS1	5.47e-05	red	NA
THAP9-AS1	TTTY13	4.02e-10	red	red
THAP9-AS1	TUBAP12	6.96e-08	red	red
THAP9-AS1	TUBAP4	1.31e-09	red	red
THAP9-AS1	TUBB1	6.47e-06	red	red
THAP9-AS1	TUBB4BP8	1.26e-06	red	red
THAP9-AS1	TUBGCP6	0.001252	red	red
THAP9-AS1	U2AF1L5	1.22e-07	red	red
THAP9-AS1	UBAP1L	0.000257	red	red
THAP9-AS1	UBE2FP3	2.94e-07	red	red
THAP9-AS1	UBE2Q1.AS1	1.12e-06	red	NA
THAP9-AS1	UBE2Q2P2	2.53e-05	red	red
THAP9-AS1	UBOX5.AS1	8.81e-05	red	NA
THAP9-AS1	UCP3	1.53e-05	red	red
THAP9-AS1	UNC93B6	2.2e-08	red	red
THAP9-AS1	UPK3B	4.62e-07	red	red
THAP9-AS1	URAHP	4.76e-06	red	red
THAP9-AS1	USP32P2	2.3e-09	red	red
THAP9-AS1	VCPKMT	8.3e-05	red	red
THAP9-AS1	VMP1	3.18e-05	red	red
THAP9-AS1	VTI1BP4	1.27e-06	red	red
THAP9-AS1	WASH2P	2.85e-05	red	red
THAP9-AS1	WASH7P	1.75e-05	red	red
THAP9-AS1	WASIR1	7.11e-11	red	red
THAP9-AS1	WDR73	5.48e-05	red	red
THAP9-AS1	WSB1	0.000414	red	red
THAP9-AS1	XRCC3	0.000276	red	red
THAP9-AS1	ZGLP1	6.03e-06	red	red
THAP9-AS1	ZMYND10	3.67e-06	red	red
THAP9-AS1	ZNF100	0.000904	red	red
THAP9-AS1	ZNF169	0.001064	red	red
THAP9-AS1	ZNF202	0.000189	red	red
THAP9-AS1	ZNF23	0.000261	red	red
THAP9-AS1	ZNF26	0.001364	red	red
THAP9-AS1	ZNF32.AS1	9.55e-10	red	NA
THAP9-AS1	ZNF320	0.000654	red	red
THAP9-AS1	ZNF334	6.7e-06	red	red
THAP9-AS1	ZNF337	8.61e-06	red	red
THAP9-AS1	ZNF497	1.69e-05	red	red
THAP9-AS1	ZNF514	6.5e-05	red	red
THAP9-AS1	ZNF587	0.020061	red	red
THAP9-AS1	ZNF723	7.3e-07	red	red
THAP9-AS1	ZNF767P	0.00065	red	red
THAP9-AS1	ZNF789	0.018404	red	red
THAP9-AS1	ZNF841	0.003033	red	red
THAP9-AS1	ZNF846	8.85e-07	red	red
THAP9-AS1	ZRSR2P1	4.57e-06	red	red

## Sheet: COAD_tumor
gene1	gene2	correlation	module1	module2
THAP9-AS1	AARSD1	0.001071	green	green
THAP9-AS1	ABCA11P	0.000304	green	green
THAP9-AS1	ABCA7	6.54e-07	green	green
THAP9-AS1	ABCB6	2.52e-05	green	green
THAP9-AS1	ABCC3	3.92e-06	green	green
THAP9-AS1	ABCC5	0.000343	green	green
THAP9-AS1	ABHD1	7.41e-07	green	green
THAP9-AS1	ABHD14A.ACY1	1.71e-05	green	NA
THAP9-AS1	ABO	2.06e-07	green	green
THAP9-AS1	ACAP3	8.91e-06	green	green
THAP9-AS1	ACBD4	6.98e-05	green	green
THAP9-AS1	ACCS	4.13e-05	green	green
THAP9-AS1	ACRV1	4.38e-05	green	green
THAP9-AS1	ACSBG1	1.76e-06	green	green
THAP9-AS1	ACTG1P17	1.34e-06	green	green
THAP9-AS1	ADAMTS13	1.01e-05	green	green
THAP9-AS1	ADAMTS17	2.63e-08	green	green
THAP9-AS1	ADAMTSL5	1.63e-08	green	green
THAP9-AS1	ADAT2	0.002889	green	green
THAP9-AS1	ADCY10P1	2.11e-05	green	green
THAP9-AS1	AFG3L1P	0.000138	green	green
THAP9-AS1	AGAP4	0.001105	green	green
THAP9-AS1	AGAP5	0.000134	green	green
THAP9-AS1	AGAP6	0.002827	green	green
THAP9-AS1	AGAP9	5.96e-05	green	green
THAP9-AS1	AGBL2	1.91e-05	green	green
THAP9-AS1	AGBL3	9.82e-05	green	green
THAP9-AS1	AHSA2P	0.0017	green	green
THAP9-AS1	AIFM3	6.95e-08	green	green
THAP9-AS1	AJM1	1.49e-07	green	green
THAP9-AS1	AKAP17A	9.99e-05	green	green
THAP9-AS1	AKNAD1	1.51e-07	green	green
THAP9-AS1	AKR7L	2.38e-06	green	green
THAP9-AS1	ALG1L10P	8.43e-09	green	green
THAP9-AS1	ALG1L2	1.19e-06	green	green
THAP9-AS1	ALKBH6	0.001227	green	green
THAP9-AS1	ALMS1P1	1.96e-07	green	green
THAP9-AS1	ALOX12	6.71e-06	green	green
THAP9-AS1	ALOX12.AS1	0.000312	green	NA
THAP9-AS1	ALS2CL	8.01e-05	green	green
THAP9-AS1	AMIGO3	3.03e-07	green	green
THAP9-AS1	AMT	1.24e-08	green	green
THAP9-AS1	AMY2B	1.31e-05	green	green
THAP9-AS1	ANAPC2	0.000224	green	green
THAP9-AS1	ANKDD1B	7.38e-07	green	green
THAP9-AS1	ANKHD1.EIF4EBP3	0.000211	green	NA
THAP9-AS1	ANKRD13D	0.000147	green	green
THAP9-AS1	ANKRD23	0.000506	green	green
THAP9-AS1	ANKRD24	4.45e-09	green	green
THAP9-AS1	ANKRD49	0.000844	green	green
THAP9-AS1	ANKRD9	6.59e-07	green	green
THAP9-AS1	ANKS3	0.000347	green	green
THAP9-AS1	ANKZF1	0.002422	green	green
THAP9-AS1	ANO8	1.45e-05	green	green
THAP9-AS1	ANO9	9.55e-06	green	green
THAP9-AS1	AP1G2	9.85e-05	green	green
THAP9-AS1	AP4B1.AS1	0.000113	green	NA
THAP9-AS1	APBB3	0.000148	green	green
THAP9-AS1	AQP11	8.68e-07	green	green
THAP9-AS1	ARHGAP27P1.BPTFP1.KPNA2P3	6.68e-06	green	NA
THAP9-AS1	ARHGAP33	5.25e-05	green	green
THAP9-AS1	ARHGAP4	8.69e-09	green	green
THAP9-AS1	ARHGAP42.AS1	7.02e-07	green	NA
THAP9-AS1	ARHGAP8	5.26e-05	green	green
THAP9-AS1	ARHGEF2.AS1	6.35e-06	green	NA
THAP9-AS1	ARHGEF2.AS2	1.97e-05	green	NA
THAP9-AS1	ARL6IP4	4.16e-05	green	green
THAP9-AS1	ARMC12	2.73e-07	green	green
THAP9-AS1	ARPC4.TTLL3	7.56e-08	green	NA
THAP9-AS1	ARRDC1.AS1	0.000138	green	NA
THAP9-AS1	ARSG	2.4e-05	green	green
THAP9-AS1	ARTN	2.2e-08	green	green
THAP9-AS1	ASB16	8.67e-05	green	green
THAP9-AS1	ASB16.AS1	0.000106	green	NA
THAP9-AS1	ASH1L.AS1	0.000131	green	NA
THAP9-AS1	ASPDH	2.53e-07	green	green
THAP9-AS1	ATAD3B	6.04e-05	green	green
THAP9-AS1	ATAT1	0.000766	green	green
THAP9-AS1	ATE1.AS1	1.18e-07	green	NA
THAP9-AS1	ATF7.NPFF	7.64e-05	green	NA
THAP9-AS1	ATG16L2	4.41e-05	green	green
THAP9-AS1	ATG4B	0.00043	green	green
THAP9-AS1	ATP2A1	6.12e-08	green	green
THAP9-AS1	ATP2C2.AS1	4.74e-05	green	NA
THAP9-AS1	ATP6AP1L	3.07e-05	green	green
THAP9-AS1	ATP6V1FNB	9.41e-07	green	green
THAP9-AS1	ATXN2	0.001931	green	green
THAP9-AS1	B3GAT1.DT	2.47e-07	green	NA
THAP9-AS1	B3GNTL1	4.75e-05	green	green
THAP9-AS1	BAIAP2L2	1.09e-06	green	green
THAP9-AS1	BAIAP3	2.19e-09	green	green
THAP9-AS1	BBS1	0.00232	green	green
THAP9-AS1	BCDIN3D.AS1	0.000201	green	NA
THAP9-AS1	BCL2L2.PABPN1	0.000111	green	NA
THAP9-AS1	BCO2	5.11e-05	green	green
THAP9-AS1	BGLAP	1.19e-05	green	green
THAP9-AS1	BICDL2	3.04e-05	green	green
THAP9-AS1	BMS1P4	9.43e-05	green	green
THAP9-AS1	BMS1P4.AGAP5	3.24e-06	green	NA
THAP9-AS1	BNIP3P4	2.13e-07	green	green
THAP9-AS1	BNIPL	8.25e-07	green	green
THAP9-AS1	BORCS8.MEF2B	6.53e-07	green	NA
THAP9-AS1	BRICD5	2.58e-05	green	green
THAP9-AS1	BTG3.AS1	5.05e-06	green	NA
THAP9-AS1	BTN2A3P	7.73e-05	green	green
THAP9-AS1	BTNL9	2.06e-08	green	green
THAP9-AS1	C11orf72	1.36e-08	green	green
THAP9-AS1	C11orf80	5.67e-05	green	green
THAP9-AS1	C11orf94	2.51e-08	green	green
THAP9-AS1	C12orf71	1.07e-07	green	green
THAP9-AS1	C12orf76	0.001904	green	green
THAP9-AS1	C17orf67	2.54e-07	green	green
THAP9-AS1	C1orf159	6.07e-05	green	green
THAP9-AS1	C1orf220	4.77e-05	green	green
THAP9-AS1	C20orf144	1.14e-05	green	green
THAP9-AS1	C21orf58	5.43e-05	green	green
THAP9-AS1	C2orf92	0.000298	green	green
THAP9-AS1	C5	8.45e-08	green	green
THAP9-AS1	C5orf63	0.000441	green	green
THAP9-AS1	C5orf66	3.82e-05	green	green
THAP9-AS1	C6orf141	1.12e-06	green	green
THAP9-AS1	C9orf163	1.25e-06	green	green
THAP9-AS1	CA14	8.42e-08	green	green
THAP9-AS1	CACNA1F	5.17e-10	green	green
THAP9-AS1	CACTIN.AS1	3.17e-05	green	NA
THAP9-AS1	CALML6	5.41e-09	green	green
THAP9-AS1	CAPN10	0.001139	green	green
THAP9-AS1	CAPN10.DT	0.000877	green	NA
THAP9-AS1	CAPN12	2.31e-09	green	green
THAP9-AS1	CAPN3	3.79e-06	green	green
THAP9-AS1	CAPN8	1.38e-06	green	green
THAP9-AS1	CAPRIN2	9.22e-06	green	green
THAP9-AS1	CARMIL3	1.63e-06	green	green
THAP9-AS1	CATSPER2	4.26e-05	green	green
THAP9-AS1	CATSPER3	3.01e-05	green	green
THAP9-AS1	CATSPERG	8.33e-09	green	green
THAP9-AS1	CBR3.AS1	6.84e-05	green	NA
THAP9-AS1	CBWD5	0.000624	green	green
THAP9-AS1	CBWD6	0.002433	green	green
THAP9-AS1	CBX3P2	1.87e-06	green	green
THAP9-AS1	CCDC114	1.21e-09	green	green
THAP9-AS1	CCDC130	0.000396	green	green
THAP9-AS1	CCDC14	0.001215	green	green
THAP9-AS1	CCDC146	0.000245	green	green
THAP9-AS1	CCDC150	0.000725	green	green
THAP9-AS1	CCDC154	5.12e-08	green	green
THAP9-AS1	CCDC159	7.67e-05	green	green
THAP9-AS1	CCDC162P	3.67e-07	green	green
THAP9-AS1	CCDC17	9.26e-07	green	green
THAP9-AS1	CCDC183	2.58e-06	green	green
THAP9-AS1	CCDC183.AS1	2.49e-05	green	NA
THAP9-AS1	CCDC188	1.68e-08	green	green
THAP9-AS1	CCDC189	3.27e-06	green	green
THAP9-AS1	CCDC191	0.001939	green	green
THAP9-AS1	CCDC24	5.47e-06	green	green
THAP9-AS1	CCDC28A.AS1	2.45e-06	green	NA
THAP9-AS1	CCDC40	1.78e-06	green	green
THAP9-AS1	CCDC57	0.000369	green	green
THAP9-AS1	CCDC73	1.75e-06	green	green
THAP9-AS1	CCDC78	1.37e-07	green	green
THAP9-AS1	CCHCR1	0.000155	green	green
THAP9-AS1	CCND2.AS1	2.23e-08	green	NA
THAP9-AS1	CCNL1	0.004161	green	green
THAP9-AS1	CCNL2	0.001047	green	green
THAP9-AS1	CCT6P3	0.000435	green	green
THAP9-AS1	CCZ1P	1.56e-06	green	green
THAP9-AS1	CD27.AS1	5.27e-05	green	NA
THAP9-AS1	CD99P1	6.06e-05	green	green
THAP9-AS1	CDC37L1.DT	1.07e-05	green	NA
THAP9-AS1	CDH24	1.43e-07	green	green
THAP9-AS1	CDHR3	9.17e-05	green	green
THAP9-AS1	CDK10	0.000237	green	green
THAP9-AS1	CDK11A	0.000292	green	green
THAP9-AS1	CDK20	5.01e-05	green	green
THAP9-AS1	CDK3	0.000114	green	green
THAP9-AS1	CDK5RAP3	0.000688	green	green
THAP9-AS1	CDKL3	0.000252	green	green
THAP9-AS1	CDNF	6.1e-06	green	green
THAP9-AS1	CEACAM19	3.19e-07	green	green
THAP9-AS1	CELF5	1.02e-07	green	green
THAP9-AS1	CENATAC	0.000651	green	green
THAP9-AS1	CENPT	0.000343	green	green
THAP9-AS1	CEP152	0.000556	green	green
THAP9-AS1	CEP43	0.006179	green	green
THAP9-AS1	CEP83.DT	1.46e-05	green	NA
THAP9-AS1	CEP95	0.005862	green	green
THAP9-AS1	CES3	5.79e-09	green	green
THAP9-AS1	CES4A	6.71e-07	green	green
THAP9-AS1	CFAP251	2.25e-07	green	green
THAP9-AS1	CFAP44	0.000517	green	green
THAP9-AS1	CFAP52	5.53e-08	green	green
THAP9-AS1	CHKB	0.000835	green	green
THAP9-AS1	CHKB.CPT1B	6.96e-05	green	NA
THAP9-AS1	CHRNA10	1.23e-05	green	green
THAP9-AS1	CIRBP.AS1	1.2e-05	green	NA
THAP9-AS1	CLASRP	0.000439	green	green
THAP9-AS1	CLEC18A	3.73e-08	green	green
THAP9-AS1	CLK1	0.005851	green	green
THAP9-AS1	CLK2	0.000914	green	green
THAP9-AS1	CLK4	0.003366	green	green
THAP9-AS1	CLUHP3	0.001216	green	green
THAP9-AS1	CNGA4	9.19e-09	green	green
THAP9-AS1	CNKSR1	5.8e-05	green	green
THAP9-AS1	COA6.AS1	2.13e-05	green	NA
THAP9-AS1	COL27A1	2.34e-07	green	green
THAP9-AS1	COL6A4P1	5.01e-06	green	green
THAP9-AS1	COLQ	1.16e-05	green	green
THAP9-AS1	CORT	4.63e-07	green	green
THAP9-AS1	COX1	2.13e-06	green	green
THAP9-AS1	COX2	9.74e-06	green	green
THAP9-AS1	COX3	8.8e-06	green	green
THAP9-AS1	CPNE7	1.41e-07	green	green
THAP9-AS1	CPT1B	3.02e-05	green	green
THAP9-AS1	CRACR2B	8.2e-07	green	green
THAP9-AS1	CREBZF	0.00596	green	green
THAP9-AS1	CRHR2	1.49e-07	green	green
THAP9-AS1	CROCC	5.74e-05	green	green
THAP9-AS1	CROCCP2	0.000243	green	green
THAP9-AS1	CROCCP3	0.000129	green	green
THAP9-AS1	CRYBB2	2.16e-09	green	green
THAP9-AS1	CRYBB2P1	1.26e-05	green	green
THAP9-AS1	CRYBB3	1.48e-06	green	green
THAP9-AS1	CRYGS	0.000323	green	green
THAP9-AS1	CSAD	0.000421	green	green
THAP9-AS1	CSPG4P10	1.77e-05	green	green
THAP9-AS1	CTAGE12P	5.09e-08	green	green
THAP9-AS1	CTBP1.AS	8.76e-05	green	NA
THAP9-AS1	CTC.338M12.4	0.00024	green	NA
THAP9-AS1	CUTALP	0.000225	green	green
THAP9-AS1	CUZD1	2.92e-05	green	green
THAP9-AS1	CXorf65	1.95e-08	green	green
THAP9-AS1	CYP2D6	1.74e-08	green	green
THAP9-AS1	CYP2D7	1.62e-07	green	green
THAP9-AS1	CYP2D8P	2.58e-06	green	green
THAP9-AS1	CYP2R1	0.001402	green	green
THAP9-AS1	CYP3A5	8.63e-07	green	green
THAP9-AS1	CYP4F12	1.46e-06	green	green
THAP9-AS1	CYP4F35P	9.11e-10	green	green
THAP9-AS1	D2HGDH	2.15e-05	green	green
THAP9-AS1	DCST1	2.34e-05	green	green
THAP9-AS1	DCST2	9.12e-07	green	green
THAP9-AS1	DDTL	1.49e-05	green	green
THAP9-AS1	DDX11.AS1	2.72e-05	green	NA
THAP9-AS1	DDX39B	0.00276	green	green
THAP9-AS1	DDX39B.AS1	6.83e-08	green	NA
THAP9-AS1	DENND3	1.69e-05	green	green
THAP9-AS1	DENND6B	1.28e-06	green	green
THAP9-AS1	DFFBP1	5.5e-06	green	green
THAP9-AS1	DGUOK.AS1	4.08e-05	green	NA
THAP9-AS1	DHRS1	1.16e-06	green	green
THAP9-AS1	DHRS4L1	1.75e-07	green	green
THAP9-AS1	DICER1.AS1	7.33e-05	green	NA
THAP9-AS1	DIO3OS	1.09e-08	green	green
THAP9-AS1	DM1.AS	4.58e-05	green	NA
THAP9-AS1	DMAP1	0.000383	green	green
THAP9-AS1	DMTF1	0.002917	green	green
THAP9-AS1	DNAH1	0.00011	green	green
THAP9-AS1	DNAH17	4.6e-06	green	green
THAP9-AS1	DNAH3	2.78e-06	green	green
THAP9-AS1	DNAJC27.AS1	2.05e-05	green	NA
THAP9-AS1	DNASE1L2	6.5e-09	green	green
THAP9-AS1	DNHD1	0.000153	green	green
THAP9-AS1	DNLZ	5.7e-07	green	green
THAP9-AS1	DOC2A	1.45e-09	green	green
THAP9-AS1	DPH7	0.000848	green	green
THAP9-AS1	DPP9.AS1	6.74e-06	green	NA
THAP9-AS1	DRD4	1.38e-08	green	green
THAP9-AS1	DRICH1	1.23e-07	green	green
THAP9-AS1	DTX2P1.UPK3BP1.PMS2P11	0.000575	green	NA
THAP9-AS1	DUSP28	0.001171	green	green
THAP9-AS1	DUX4L26	1.33e-09	green	green
THAP9-AS1	DUXAP1	6.27e-06	green	green
THAP9-AS1	DXO	0.000244	green	green
THAP9-AS1	DYNLT2	0.000871	green	green
THAP9-AS1	ECHDC2	0.000321	green	green
THAP9-AS1	EFCAB5	3.42e-06	green	green
THAP9-AS1	EFHB	4.09e-08	green	green
THAP9-AS1	EFHC1	0.000267	green	green
THAP9-AS1	EGFL8	0.000906	green	green
THAP9-AS1	EGLN2	0.000736	green	green
THAP9-AS1	EIF4A1	0.000325	green	green
THAP9-AS1	ELMOD3	0.002401	green	green
THAP9-AS1	EMC1.AS1	6.23e-06	green	NA
THAP9-AS1	EME2	6.22e-05	green	green
THAP9-AS1	ENDOV	1.25e-05	green	green
THAP9-AS1	ENGASE	9.54e-06	green	green
THAP9-AS1	ENO3	2.5e-05	green	green
THAP9-AS1	ENOSF1	4.14e-05	green	green
THAP9-AS1	ENPP7P11	2.31e-06	green	green
THAP9-AS1	ENTPD2	1.25e-08	green	green
THAP9-AS1	EP400P1	0.002084	green	green
THAP9-AS1	EPHA10	1.53e-06	green	green
THAP9-AS1	EPO	7.89e-10	green	green
THAP9-AS1	EPS8L1	2.42e-07	green	green
THAP9-AS1	EPS8L2	3.68e-05	green	green
THAP9-AS1	EPS8L3	4.27e-05	green	green
THAP9-AS1	EPX	1.56e-07	green	green
THAP9-AS1	ERICH6B	9.8e-05	green	green
THAP9-AS1	ERMARD	0.000438	green	green
THAP9-AS1	ERN2	1e-07	green	green
THAP9-AS1	ERVK3.1	0.003239	green	NA
THAP9-AS1	ESYT3	5.13e-08	green	green
THAP9-AS1	EXD3	4.37e-05	green	green
THAP9-AS1	EXOC3L4	7.13e-08	green	green
THAP9-AS1	EXTL3.AS1	1.12e-06	green	NA
THAP9-AS1	EZH1	0.001263	green	green
THAP9-AS1	FAHD2CP	9.58e-05	green	green
THAP9-AS1	FALEC	3.1e-06	green	green
THAP9-AS1	FAM118A	3.67e-05	green	green
THAP9-AS1	FAM135A.AS1	2.39e-08	green	NA
THAP9-AS1	FAM160A2	0.000291	green	green
THAP9-AS1	FAM166B	2.01e-08	green	green
THAP9-AS1	FAM183A	8.79e-09	green	green
THAP9-AS1	FAM193B	0.000856	green	green
THAP9-AS1	FAM209A	5.72e-07	green	green
THAP9-AS1	FAM209B	1.83e-08	green	green
THAP9-AS1	FAM21EP	1.7e-06	green	green
THAP9-AS1	FAM21FP	7.5e-06	green	green
THAP9-AS1	FAM221A	2.66e-05	green	green
THAP9-AS1	FAM221B	7.76e-08	green	green
THAP9-AS1	FAM227A	1.57e-05	green	green
THAP9-AS1	FAM229A	2.76e-06	green	green
THAP9-AS1	FAM24B	3.98e-05	green	green
THAP9-AS1	FAM27C	2.79e-06	green	green
THAP9-AS1	FAM27E3	1.11e-05	green	green
THAP9-AS1	FAM3D.AS1	4.18e-09	green	NA
THAP9-AS1	FAM47E	8.24e-05	green	green
THAP9-AS1	FAM66C	1.78e-07	green	green
THAP9-AS1	FAM71F2	2.58e-06	green	green
THAP9-AS1	FANK1	3.36e-05	green	green
THAP9-AS1	FBF1	5.02e-05	green	green
THAP9-AS1	FBXL19.AS1	3.28e-05	green	NA
THAP9-AS1	FBXL8	4.8e-05	green	green
THAP9-AS1	FBXO24	1.02e-06	green	green
THAP9-AS1	FBXO43	5.17e-08	green	green
THAP9-AS1	FBXO44	1.62e-07	green	green
THAP9-AS1	FBXW11P1	9.24e-06	green	green
THAP9-AS1	FCHO1	1.19e-08	green	green
THAP9-AS1	FCHSD1	0.000206	green	green
THAP9-AS1	FITM1	1.81e-07	green	green
THAP9-AS1	FLJ31356	6.73e-08	green	green
THAP9-AS1	FLJ38576	4.17e-07	green	green
THAP9-AS1	FNBP4	0.011418	green	green
THAP9-AS1	FRMD1	2.02e-08	green	green
THAP9-AS1	FSCN2	1.67e-08	green	green
THAP9-AS1	FUT3	8.23e-08	green	green
THAP9-AS1	GABBR1	9.93e-07	green	green
THAP9-AS1	GABPB2	0.002482	green	green
THAP9-AS1	GABRE	2.51e-06	green	green
THAP9-AS1	GALT	7.05e-05	green	green
THAP9-AS1	GAPDHP62	1.42e-06	green	green
THAP9-AS1	GARNL3	0.000636	green	green
THAP9-AS1	GATA6.AS1	1.46e-05	green	NA
THAP9-AS1	GBAP1	4.59e-05	green	green
THAP9-AS1	GCC2.AS1	3.21e-05	green	NA
THAP9-AS1	GCNA	4.54e-06	green	green
THAP9-AS1	GDF9	0.000265	green	green
THAP9-AS1	GEMIN7.AS1	2.11e-05	green	NA
THAP9-AS1	GGTA2P	4.95e-07	green	green
THAP9-AS1	GIGYF1	0.000866	green	green
THAP9-AS1	GLUD1P2	1.68e-07	green	green
THAP9-AS1	GLUD1P3	0.000237	green	green
THAP9-AS1	GNB3	3.59e-08	green	green
THAP9-AS1	GOLGA2P5	0.000156	green	green
THAP9-AS1	GOLGA6L17P	2.13e-08	green	green
THAP9-AS1	GOLGA6L4	1.32e-05	green	green
THAP9-AS1	GOLGA6L9	0.000342	green	green
THAP9-AS1	GOLGA8A	6.42e-07	green	green
THAP9-AS1	GOLGA8B	5.15e-06	green	green
THAP9-AS1	GPC2	2.82e-06	green	green
THAP9-AS1	GPR199P	8.87e-05	green	green
THAP9-AS1	GPR35	1.36e-05	green	green
THAP9-AS1	GPR61	2.03e-05	green	green
THAP9-AS1	GPR75	0.000114	green	green
THAP9-AS1	GPR78	8.9e-09	green	green
THAP9-AS1	GPR89B	0.000951	green	green
THAP9-AS1	GPRC5D.AS1	4.84e-05	green	NA
THAP9-AS1	GPS2	4.88e-05	green	green
THAP9-AS1	GRID2IP	7.52e-06	green	green
THAP9-AS1	GRIN3B	2.41e-10	green	green
THAP9-AS1	GS1.124K5.11	0.000186	green	NA
THAP9-AS1	GSTM2	5.35e-07	green	green
THAP9-AS1	GTF2H4	0.002971	green	green
THAP9-AS1	GTF2IP14	5.62e-05	green	green
THAP9-AS1	GTPBP2	9.29e-05	green	green
THAP9-AS1	GUCA1B	8.65e-07	green	green
THAP9-AS1	GUCY1B2	2.16e-07	green	green
THAP9-AS1	GUSBP1	0.000694	green	green
THAP9-AS1	GUSBP11	0.000351	green	green
THAP9-AS1	GVQW3	5.87e-05	green	green
THAP9-AS1	H2BC19P	0.000128	green	green
THAP9-AS1	H2BC20P	0.000279	green	green
THAP9-AS1	HCG14	1.58e-08	green	green
THAP9-AS1	HCG20	4.25e-08	green	green
THAP9-AS1	HCG25	6.65e-05	green	green
THAP9-AS1	HCG27	8.24e-06	green	green
THAP9-AS1	HCN3	4.29e-05	green	green
THAP9-AS1	HDAC10	0.000142	green	green
THAP9-AS1	HDAC4.AS1	4.33e-08	green	NA
THAP9-AS1	HEATR4	2.21e-05	green	green
THAP9-AS1	HEMK1	0.000585	green	green
THAP9-AS1	HERC2P2	4.31e-05	green	green
THAP9-AS1	HERC2P3	2.39e-10	green	green
THAP9-AS1	HERC2P7	1.33e-05	green	green
THAP9-AS1	HERC2P9	0.000286	green	green
THAP9-AS1	HESX1	7.07e-05	green	green
THAP9-AS1	HEXD	1.11e-05	green	green
THAP9-AS1	HEXIM2	0.000237	green	green
THAP9-AS1	HIP1R	3.03e-05	green	green
THAP9-AS1	HIPK1.AS1	3.73e-07	green	NA
THAP9-AS1	HLA.K	1.24e-09	green	NA
THAP9-AS1	HMGB3P22	8.48e-08	green	green
THAP9-AS1	HMGN3.AS1	7.97e-05	green	NA
THAP9-AS1	HNF1A.AS1	7.21e-05	green	NA
THAP9-AS1	HNRNPCP7	2.8e-05	green	green
THAP9-AS1	HNRNPH1	0.009636	green	green
THAP9-AS1	HOOK2	0.000173	green	green
THAP9-AS1	HOTAIRM1	5.13e-07	green	green
THAP9-AS1	HOXA10.AS	6.84e-07	green	NA
THAP9-AS1	HOXA2	8.65e-09	green	green
THAP9-AS1	HOXA3	2.47e-07	green	green
THAP9-AS1	HOXA4	3.4e-07	green	green
THAP9-AS1	HOXA5	3.18e-08	green	green
THAP9-AS1	HOXB.AS3	2.12e-08	green	NA
THAP9-AS1	HOXB3	5.96e-07	green	green
THAP9-AS1	HOXB5	2.1e-08	green	green
THAP9-AS1	HOXB6	2.19e-08	green	green
THAP9-AS1	HOXB9	9.3e-08	green	green
THAP9-AS1	HOXD4	1.99e-08	green	green
THAP9-AS1	HPX	6.85e-07	green	green
THAP9-AS1	HSD11B2	3.11e-08	green	green
THAP9-AS1	HSD17B7P2	8.99e-05	green	green
THAP9-AS1	HSF4	1.53e-05	green	green
THAP9-AS1	HSPBAP1	0.001175	green	green
THAP9-AS1	HYI	0.000179	green	green
THAP9-AS1	HYPK	1.01e-05	green	green
THAP9-AS1	IBA57.DT	1.43e-07	green	NA
THAP9-AS1	IDUA	8.2e-07	green	green
THAP9-AS1	IFT74.AS1	4.5e-10	green	NA
THAP9-AS1	IGSF9	2.05e-07	green	green
THAP9-AS1	IKBKGP1	1.38e-06	green	green
THAP9-AS1	IL11RA	7.25e-05	green	green
THAP9-AS1	IL1RL2	2.36e-07	green	green
THAP9-AS1	ING5	0.001285	green	green
THAP9-AS1	INHBC	3.08e-09	green	green
THAP9-AS1	INO80E	0.000374	green	green
THAP9-AS1	INPP5E	0.000282	green	green
THAP9-AS1	INTS4P1	2.78e-06	green	green
THAP9-AS1	INTS4P2	3.82e-06	green	green
THAP9-AS1	INTS6.AS1	2.78e-05	green	NA
THAP9-AS1	IPO9.AS1	4.94e-08	green	NA
THAP9-AS1	IRF9	1.44e-05	green	green
THAP9-AS1	ITGA9.AS1	0.000324	green	NA
THAP9-AS1	IZUMO4	4.33e-07	green	green
THAP9-AS1	JMJD7	4.26e-06	green	green
THAP9-AS1	JMJD7.PLA2G4B	0.000149	green	NA
THAP9-AS1	JRKL	0.001236	green	green
THAP9-AS1	KATNAL2	5.49e-08	green	green
THAP9-AS1	KCNAB3	5.78e-07	green	green
THAP9-AS1	KCNC4	2.12e-06	green	green
THAP9-AS1	KCNH8	3.82e-06	green	green
THAP9-AS1	KCNJ14	2.22e-05	green	green
THAP9-AS1	KCNMB3	2.93e-05	green	green
THAP9-AS1	KCTD13	0.000184	green	green
THAP9-AS1	KHDC4	0.005532	green	green
THAP9-AS1	KIAA0895L	0.000179	green	green
THAP9-AS1	KIAA1614.AS1	4.93e-07	green	NA
THAP9-AS1	KIF12	2.15e-07	green	green
THAP9-AS1	KLC1	0.000312	green	green
THAP9-AS1	KLHDC4	0.000576	green	green
THAP9-AS1	KLHL17	3.18e-06	green	green
THAP9-AS1	KLHL2P1	2.87e-06	green	green
THAP9-AS1	KLHL31	4.55e-05	green	green
THAP9-AS1	KLKB1	6.2e-09	green	green
THAP9-AS1	KMT5C	0.000123	green	green
THAP9-AS1	KRT8P12	9.31e-05	green	green
THAP9-AS1	KRTAP5.1	3.04e-06	green	NA
THAP9-AS1	KRTAP5.2	6.6e-09	green	NA
THAP9-AS1	KRTAP5.8	3.62e-10	green	NA
THAP9-AS1	KRTAP5.9	6.93e-08	green	NA
THAP9-AS1	L3HYPDH	0.000207	green	green
THAP9-AS1	L3MBTL1	2.61e-06	green	green
THAP9-AS1	LAT	2.05e-06	green	green
THAP9-AS1	LBHD1	0.000271	green	green
THAP9-AS1	LBX2	2.15e-07	green	green
THAP9-AS1	LCAT	3.01e-06	green	green
THAP9-AS1	LCN12	1.57e-07	green	green
THAP9-AS1	LCN1P1	8.79e-08	green	green
THAP9-AS1	LEAP2	2.6e-05	green	green
THAP9-AS1	LEKR1	5.43e-06	green	green
THAP9-AS1	LENG8	0.000313	green	green
THAP9-AS1	LENG8.AS1	0.000485	green	NA
THAP9-AS1	LETMD1	0.001228	green	green
THAP9-AS1	LIME1	1.6e-05	green	green
THAP9-AS1	LINC00106	1.57e-05	green	green
THAP9-AS1	LINC00115	0.000344	green	green
THAP9-AS1	LINC00174	4.82e-05	green	green
THAP9-AS1	LINC00240	3.05e-07	green	green
THAP9-AS1	LINC00244	1e-06	green	green
THAP9-AS1	LINC00672	3.67e-07	green	green
THAP9-AS1	LINC00852	3.69e-05	green	green
THAP9-AS1	LINC00858	6.9e-08	green	green
THAP9-AS1	LINC00870	1.31e-07	green	green
THAP9-AS1	LINC00893	2.63e-05	green	green
THAP9-AS1	LINC00896	1.27e-09	green	green
THAP9-AS1	LINC00921	2.84e-05	green	green
THAP9-AS1	LINC00954	2.64e-08	green	green
THAP9-AS1	LINC01011	4.36e-05	green	green
THAP9-AS1	LINC01012	0.000443	green	green
THAP9-AS1	LINC01089	6.92e-05	green	green
THAP9-AS1	LINC01123	6.09e-05	green	green
THAP9-AS1	LINC01126	5.84e-06	green	green
THAP9-AS1	LINC01138	3.07e-05	green	green
THAP9-AS1	LINC01144	1.3e-06	green	green
THAP9-AS1	LINC01176	1.84e-05	green	green
THAP9-AS1	LINC01237	1.68e-06	green	green
THAP9-AS1	LINC01252	1.27e-07	green	green
THAP9-AS1	LINC01342	2.14e-07	green	green
THAP9-AS1	LINC01347	1.16e-05	green	green
THAP9-AS1	LINC01402	1.61e-08	green	green
THAP9-AS1	LINC01637	1.26e-06	green	green
THAP9-AS1	LINC01748	2.44e-07	green	green
THAP9-AS1	LINC01869	2.7e-08	green	green
THAP9-AS1	LINC01909	2.92e-07	green	green
THAP9-AS1	LINC01970	2.14e-09	green	green
THAP9-AS1	LINC02021	1.39e-06	green	green
THAP9-AS1	LINC02026	1.42e-07	green	green
THAP9-AS1	LINC02043	1.08e-08	green	green
THAP9-AS1	LINC02044	1.13e-07	green	green
THAP9-AS1	LINC02062	1.78e-05	green	green
THAP9-AS1	LINC02166	8.23e-07	green	green
THAP9-AS1	LINC02210	0.000431	green	green
THAP9-AS1	LINC02361	2.89e-09	green	green
THAP9-AS1	LINC02363	2.56e-05	green	green
THAP9-AS1	LINC02481	9.12e-06	green	green
THAP9-AS1	LINC02585	5.07e-05	green	green
THAP9-AS1	LINC02615	1.54e-05	green	green
THAP9-AS1	LINC02626	2.87e-08	green	green
THAP9-AS1	LINC02800	6.55e-10	green	green
THAP9-AS1	LMBR1L	0.000286	green	green
THAP9-AS1	LMCD1.AS1	3.8e-07	green	NA
THAP9-AS1	LMNTD2	3.25e-07	green	green
THAP9-AS1	LMNTD2.AS1	9.23e-09	green	NA
THAP9-AS1	LNCOC1	4.48e-08	green	green
THAP9-AS1	LOC100128568	2.64e-05	green	green
THAP9-AS1	LOC100128770	9.99e-05	green	green
THAP9-AS1	LOC100129215	1.29e-06	green	green
THAP9-AS1	LOC100129534	1.36e-07	green	green
THAP9-AS1	LOC100129878	1.06e-07	green	green
THAP9-AS1	LOC100129917	0.000317	green	green
THAP9-AS1	LOC100130950	0.00025	green	green
THAP9-AS1	LOC100131465	2.22e-06	green	green
THAP9-AS1	LOC100131785	1.1e-08	green	green
THAP9-AS1	LOC100132215	0.000105	green	green
THAP9-AS1	LOC100133091	0.000167	green	green
THAP9-AS1	LOC100133286	7.11e-07	green	green
THAP9-AS1	LOC100268168	5.06e-06	green	green
THAP9-AS1	LOC100286997	4.84e-08	green	green
THAP9-AS1	LOC100288123	0.000143	green	green
THAP9-AS1	LOC100288175	5.65e-08	green	green
THAP9-AS1	LOC100288637	0.00043	green	green
THAP9-AS1	LOC100289561	6.39e-06	green	green
THAP9-AS1	LOC100420803	7.38e-09	green	green
THAP9-AS1	LOC100420839	6.95e-07	green	green
THAP9-AS1	LOC100420981	0.000163	green	green
THAP9-AS1	LOC100505774	6.49e-06	green	green
THAP9-AS1	LOC100506083	1.64e-05	green	green
THAP9-AS1	LOC100506258	2.47e-06	green	green
THAP9-AS1	LOC100507283	4.64e-05	green	green
THAP9-AS1	LOC100507291	3.34e-05	green	green
THAP9-AS1	LOC100507551	0.00018	green	green
THAP9-AS1	LOC100996419	5.9e-05	green	green
THAP9-AS1	LOC101927164	8.13e-06	green	green
THAP9-AS1	LOC101927267	5.65e-07	green	green
THAP9-AS1	LOC101927556	1.2e-05	green	green
THAP9-AS1	LOC101927702	1.26e-06	green	green
THAP9-AS1	LOC101927708	2.92e-06	green	green
THAP9-AS1	LOC101927837	7.34e-06	green	green
THAP9-AS1	LOC101928053	7.16e-06	green	green
THAP9-AS1	LOC101928058	3.88e-07	green	green
THAP9-AS1	LOC101928424	2.11e-07	green	green
THAP9-AS1	LOC101928525	9.39e-06	green	green
THAP9-AS1	LOC101928844	8.47e-07	green	green
THAP9-AS1	LOC101929099	2.66e-05	green	green
THAP9-AS1	LOC101929240	4e-07	green	green
THAP9-AS1	LOC101929295	2.62e-06	green	green
THAP9-AS1	LOC101929536	4.95e-07	green	green
THAP9-AS1	LOC101929718	1.16e-07	green	green
THAP9-AS1	LOC101930370	0.000239	green	green
THAP9-AS1	LOC102723385	1.6e-06	green	green
THAP9-AS1	LOC102723566	1.41e-06	green	green
THAP9-AS1	LOC102724301	6.24e-09	green	green
THAP9-AS1	LOC102724814	0.000188	green	green
THAP9-AS1	LOC103344931	0.00019	green	green
THAP9-AS1	LOC105274304	8.65e-08	green	green
THAP9-AS1	LOC105369332	9.72e-05	green	green
THAP9-AS1	LOC105369748	3.98e-07	green	green
THAP9-AS1	LOC105370941	2.86e-05	green	green
THAP9-AS1	LOC105371286	3.46e-08	green	green
THAP9-AS1	LOC105371824	3.96e-07	green	green
THAP9-AS1	LOC105371849	3.16e-07	green	green
THAP9-AS1	LOC105372273	0.000124	green	green
THAP9-AS1	LOC105372482	1.26e-05	green	green
THAP9-AS1	LOC105373159	8.1e-05	green	green
THAP9-AS1	LOC105375614	3.14e-10	green	green
THAP9-AS1	LOC105376748	8.03e-09	green	green
THAP9-AS1	LOC106660606	2.46e-06	green	green
THAP9-AS1	LOC107984660	3.79e-06	green	green
THAP9-AS1	LOC107984875	3.49e-07	green	green
THAP9-AS1	LOC107985040	2.31e-06	green	green
THAP9-AS1	LOC107985246	4.88e-06	green	green
THAP9-AS1	LOC115308161	4.27e-06	green	green
THAP9-AS1	LOC155060	0.000379	green	green
THAP9-AS1	LOC171391	2.2e-05	green	green
THAP9-AS1	LOC220729	0.002987	green	green
THAP9-AS1	LOC283038	5.41e-07	green	green
THAP9-AS1	LOC283335	0.000166	green	green
THAP9-AS1	LOC283710	7.11e-09	green	green
THAP9-AS1	LOC339666	7.77e-07	green	green
THAP9-AS1	LOC399900	2.59e-06	green	green
THAP9-AS1	LOC400684	1.31e-08	green	green
THAP9-AS1	LOC441239	4.18e-08	green	green
THAP9-AS1	LOC442041	5.97e-07	green	green
THAP9-AS1	LOC554249	7.7e-07	green	green
THAP9-AS1	LOC644656	0.000269	green	green
THAP9-AS1	LOC728178	3.25e-05	green	green
THAP9-AS1	LOC729867	1.28e-05	green	green
THAP9-AS1	LOC730098	1.58e-05	green	green
THAP9-AS1	LOC730183	3.01e-06	green	green
THAP9-AS1	LRP5L	9.25e-06	green	green
THAP9-AS1	LRRC3.DT	1.29e-08	green	NA
THAP9-AS1	LRRC37B	0.001636	green	green
THAP9-AS1	LRRC39	0.00032	green	green
THAP9-AS1	LRRC56	6.98e-07	green	green
THAP9-AS1	LTB4R	1.99e-07	green	green
THAP9-AS1	LTB4R2	2.1e-05	green	green
THAP9-AS1	LTO1	0.001492	green	green
THAP9-AS1	LUC7L	0.001178	green	green
THAP9-AS1	LUC7L3	0.007309	green	green
THAP9-AS1	LY6G5B	0.000285	green	green
THAP9-AS1	LYSMD4	6.26e-05	green	green
THAP9-AS1	MAFTRR	2.28e-09	green	green
THAP9-AS1	MAN2C1	0.000182	green	green
THAP9-AS1	MAPK8IP3	0.000156	green	green
THAP9-AS1	MATN1	2.17e-06	green	green
THAP9-AS1	MATN1.AS1	7.58e-05	green	NA
THAP9-AS1	MC1R	9.77e-08	green	green
THAP9-AS1	MCM3AP.AS1	0.000917	green	NA
THAP9-AS1	MDS2	8.19e-09	green	green
THAP9-AS1	MELTF.AS1	9.69e-07	green	NA
THAP9-AS1	METAP1D	0.00093	green	green
THAP9-AS1	METTL22	0.000372	green	green
THAP9-AS1	MFSD14C	0.000888	green	green
THAP9-AS1	MGAT4EP	1.74e-08	green	green
THAP9-AS1	MHENCR	1.28e-05	green	green
THAP9-AS1	MIB2	4.08e-07	green	green
THAP9-AS1	MICAL1	9.06e-05	green	green
THAP9-AS1	MICALL2	1.07e-05	green	green
THAP9-AS1	MIGA2	0.00041	green	green
THAP9-AS1	MINDY4	2.96e-05	green	green
THAP9-AS1	MINDY4B	1.34e-08	green	green
THAP9-AS1	MIR1249	5.52e-07	green	green
THAP9-AS1	MIR135A1	2.75e-06	green	green
THAP9-AS1	MIR135B	6.96e-08	green	green
THAP9-AS1	MIR148A	1.04e-05	green	green
THAP9-AS1	MIR196A1	8.03e-06	green	green
THAP9-AS1	MIR200A	3.53e-07	green	green
THAP9-AS1	MIR200B	2.89e-08	green	green
THAP9-AS1	MIR219A1	5.57e-07	green	green
THAP9-AS1	MIR25	3.56e-05	green	green
THAP9-AS1	MIR3176	5.65e-05	green	green
THAP9-AS1	MIR331	1.73e-05	green	green
THAP9-AS1	MIR339	1.35e-09	green	green
THAP9-AS1	MIR3677	4.39e-08	green	green
THAP9-AS1	MIR3682	2.12e-05	green	green
THAP9-AS1	MIR3685	0.000345	green	green
THAP9-AS1	MIR378A	9.15e-08	green	green
THAP9-AS1	MIR3936	9.87e-05	green	green
THAP9-AS1	MIR3936HG	0.000246	green	green
THAP9-AS1	MIR4258	4.28e-06	green	green
THAP9-AS1	MIR429	7.76e-06	green	green
THAP9-AS1	MIR4292	0.000217	green	green
THAP9-AS1	MIR4326	3.25e-06	green	green
THAP9-AS1	MIR4453HG	0.000575	green	green
THAP9-AS1	MIR4512	8.17e-08	green	green
THAP9-AS1	MIR4653	2.46e-05	green	green
THAP9-AS1	MIR4685	5.65e-09	green	green
THAP9-AS1	MIR4701	1.21e-05	green	green
THAP9-AS1	MIR4713HG	9.63e-07	green	green
THAP9-AS1	MIR4740	4.11e-10	green	green
THAP9-AS1	MIR4786	1.07e-06	green	green
THAP9-AS1	MIR499A	3.6e-07	green	green
THAP9-AS1	MIR5587	4.48e-06	green	green
THAP9-AS1	MIR5685	1.12e-08	green	green
THAP9-AS1	MIR589	3.54e-06	green	green
THAP9-AS1	MIR600HG	7.29e-05	green	green
THAP9-AS1	MIR616	7e-06	green	green
THAP9-AS1	MIR647	9.14e-05	green	green
THAP9-AS1	MIR6730	8.82e-10	green	green
THAP9-AS1	MIR6739	7.72e-06	green	green
THAP9-AS1	MIR6753	1.25e-07	green	green
THAP9-AS1	MIR6763	7.65e-09	green	green
THAP9-AS1	MIR6804	2.7e-09	green	green
THAP9-AS1	MIR6819	5.36e-07	green	green
THAP9-AS1	MIR6835	3.18e-05	green	green
THAP9-AS1	MIR7111	3.25e-08	green	green
THAP9-AS1	MIR765	7.85e-08	green	green
THAP9-AS1	MIR93	2.51e-08	green	green
THAP9-AS1	MIRLET7D	4.16e-07	green	green
THAP9-AS1	MKRN2OS	7.69e-07	green	green
THAP9-AS1	MLXIPL	6.11e-07	green	green
THAP9-AS1	MMADHC.DT	1.99e-07	green	NA
THAP9-AS1	MMP23A	9.49e-08	green	green
THAP9-AS1	MNX1.AS2	0.00011	green	NA
THAP9-AS1	MORN1	2.91e-05	green	green
THAP9-AS1	MPIG6B	1.35e-07	green	green
THAP9-AS1	MPL	4.48e-07	green	green
THAP9-AS1	MPP3	2.79e-05	green	green
THAP9-AS1	MRNIP	0.001655	green	green
THAP9-AS1	MROCKI	3.31e-06	green	green
THAP9-AS1	MROH7	3.83e-06	green	green
THAP9-AS1	MROH7.TTC4	1.27e-06	green	NA
THAP9-AS1	MRPL53	0.000651	green	green
THAP9-AS1	MRPS9.AS1	0.000176	green	NA
THAP9-AS1	MSANTD1	2.81e-06	green	green
THAP9-AS1	MSANTD2	0.002871	green	green
THAP9-AS1	MSH5	0.000403	green	green
THAP9-AS1	MSH5.SAPCD1	0.000181	green	NA
THAP9-AS1	MSS51	0.000478	green	green
THAP9-AS1	MST1	7.11e-09	green	green
THAP9-AS1	MST1L	4.31e-10	green	green
THAP9-AS1	MST1R	3.5e-06	green	green
THAP9-AS1	MTATP6P1	4.78e-07	green	green
THAP9-AS1	MTATP8P1	5.48e-06	green	green
THAP9-AS1	MTCO2P2	1.19e-05	green	green
THAP9-AS1	MTCP1	0.000259	green	green
THAP9-AS1	MTDHP1	7.81e-07	green	green
THAP9-AS1	MTERF2	0.002082	green	green
THAP9-AS1	MTG1	0.000333	green	green
THAP9-AS1	MTMR11	4.31e-06	green	green
THAP9-AS1	MUSTN1	8.27e-08	green	green
THAP9-AS1	MXD3	2.66e-05	green	green
THAP9-AS1	MYH3	2.13e-06	green	green
THAP9-AS1	MYL5	7.56e-06	green	green
THAP9-AS1	MYLK.AS1	2e-06	green	NA
THAP9-AS1	MYLK2	1.93e-06	green	green
THAP9-AS1	MYLK4	2.57e-06	green	green
THAP9-AS1	MYO15A	2.94e-07	green	green
THAP9-AS1	MYO15B	9.15e-07	green	green
THAP9-AS1	MYO1A	1.32e-07	green	green
THAP9-AS1	MYO7A	7.97e-08	green	green
THAP9-AS1	MYO7B	5.58e-06	green	green
THAP9-AS1	MZF1	2.44e-05	green	green
THAP9-AS1	MZF1.AS1	6.87e-05	green	NA
THAP9-AS1	NADSYN1	9.55e-05	green	green
THAP9-AS1	NBEAL2	5.14e-05	green	green
THAP9-AS1	NBPF11	0.002904	green	green
THAP9-AS1	NBPF12	0.000827	green	green
THAP9-AS1	NBPF8	0.000158	green	green
THAP9-AS1	NBR2	5.46e-05	green	green
THAP9-AS1	NCBP2.AS1	0.000212	green	NA
THAP9-AS1	ND2	3.05e-06	green	green
THAP9-AS1	ND3	8.52e-07	green	green
THAP9-AS1	NDST2	0.000776	green	green
THAP9-AS1	NDUFA3P4	2.66e-08	green	green
THAP9-AS1	NDUFA6.DT	0.000152	green	NA
THAP9-AS1	NEBL.AS1	7.67e-09	green	NA
THAP9-AS1	NEIL1	5.07e-05	green	green
THAP9-AS1	NEK8	0.000123	green	green
THAP9-AS1	NFKBID	5.9e-05	green	green
THAP9-AS1	NGEF	2.76e-05	green	green
THAP9-AS1	NICN1	0.000102	green	green
THAP9-AS1	NIPSNAP3B	6.46e-05	green	green
THAP9-AS1	NOL12	0.000374	green	green
THAP9-AS1	NOL3	2.31e-05	green	green
THAP9-AS1	NOXA1	1.1e-05	green	green
THAP9-AS1	NPDC1	5.53e-08	green	green
THAP9-AS1	NPEPL1	2.34e-05	green	green
THAP9-AS1	NPHP3	0.003236	green	green
THAP9-AS1	NPIPA1	7.97e-05	green	green
THAP9-AS1	NPIPA3	7.28e-10	green	green
THAP9-AS1	NPIPA5	6.92e-09	green	green
THAP9-AS1	NPIPB11	1.55e-08	green	green
THAP9-AS1	NPIPB14P	6.51e-05	green	green
THAP9-AS1	NPIPB15	9.09e-08	green	green
THAP9-AS1	NPIPB4	3.8e-05	green	green
THAP9-AS1	NPIPB9	5.11e-09	green	green
THAP9-AS1	NPIPP1	7.69e-06	green	green
THAP9-AS1	NR6A1	7.04e-05	green	green
THAP9-AS1	NRARP	1.52e-08	green	green
THAP9-AS1	NRIP2	1.51e-06	green	green
THAP9-AS1	NSMCE1.DT	1.77e-05	green	NA
THAP9-AS1	NSUN5P1	0.000136	green	green
THAP9-AS1	NSUN5P2	0.000236	green	green
THAP9-AS1	NSUN6	0.004494	green	green
THAP9-AS1	NSUN7	4.07e-05	green	green
THAP9-AS1	NUTM2D	1.44e-06	green	green
THAP9-AS1	OCM	5.96e-08	green	green
THAP9-AS1	OGA	0.004612	green	green
THAP9-AS1	OGFR.AS1	1.85e-05	green	NA
THAP9-AS1	OGT	0.000618	green	green
THAP9-AS1	OMP	5.05e-07	green	green
THAP9-AS1	OR10V2P	1.58e-08	green	green
THAP9-AS1	OR7E128P	9.53e-06	green	green
THAP9-AS1	OR7E7P	1.8e-07	green	green
THAP9-AS1	ORMDL1	0.006548	green	green
THAP9-AS1	OSBPL7	2.05e-05	green	green
THAP9-AS1	P2RY11	1.1e-05	green	green
THAP9-AS1	PAN2	0.00078	green	green
THAP9-AS1	PAQR6	2.68e-07	green	green
THAP9-AS1	PARD3.AS1	1.21e-07	green	NA
THAP9-AS1	PARP6	2.06e-05	green	green
THAP9-AS1	PASK	0.00074	green	green
THAP9-AS1	PAXIP1.DT	3.71e-05	green	NA
THAP9-AS1	PBX4	7.61e-06	green	green
THAP9-AS1	PCBD2	0.002757	green	green
THAP9-AS1	PCBP1.AS1	0.000376	green	NA
THAP9-AS1	PCGF3	0.002587	green	green
THAP9-AS1	PCNX2	0.000189	green	green
THAP9-AS1	PCP2	9.2e-08	green	green
THAP9-AS1	PCSK4	1.93e-07	green	green
THAP9-AS1	PDXDC2P.NPIPB14P	0.000155	green	NA
THAP9-AS1	PDZD3	8.86e-08	green	green
THAP9-AS1	PERM1	9.85e-08	green	green
THAP9-AS1	PEX6	1.02e-08	green	green
THAP9-AS1	PFN4	2.5e-06	green	green
THAP9-AS1	PGBD4	5.68e-05	green	green
THAP9-AS1	PGGHG	2.5e-09	green	green
THAP9-AS1	PHKG2	0.000153	green	green
THAP9-AS1	PHYKPL	0.000398	green	green
THAP9-AS1	PI4KAP1	1.17e-07	green	green
THAP9-AS1	PI4KAP2	0.000251	green	green
THAP9-AS1	PIDD1	5.96e-05	green	green
THAP9-AS1	PIGL	0.000172	green	green
THAP9-AS1	PIGZ	4.67e-09	green	green
THAP9-AS1	PIK3IP1.DT	6.78e-06	green	NA
THAP9-AS1	PILRB	8.93e-06	green	green
THAP9-AS1	PJVK	0.000148	green	green
THAP9-AS1	PKD1P4	6.63e-06	green	green
THAP9-AS1	PKD1P5	6.63e-09	green	green
THAP9-AS1	PLA2G4B	2.17e-05	green	green
THAP9-AS1	PLA2G4E.AS1	5.78e-09	green	NA
THAP9-AS1	PLA2G6	6.2e-05	green	green
THAP9-AS1	PLAC8L1	2.21e-05	green	green
THAP9-AS1	PLEKHG4	2.85e-06	green	green
THAP9-AS1	PLEKHH1	0.00027	green	green
THAP9-AS1	PLEKHN1	9.07e-08	green	green
THAP9-AS1	PLGLB1	3.12e-07	green	green
THAP9-AS1	PLXNA3	2.7e-05	green	green
THAP9-AS1	PLXNB1	0.000259	green	green
THAP9-AS1	PMFBP1	1.04e-07	green	green
THAP9-AS1	PMS2P3	0.001088	green	green
THAP9-AS1	PNISR	0.010403	green	green
THAP9-AS1	PNLIPRP1	4.31e-08	green	green
THAP9-AS1	PNN	0.003247	green	green
THAP9-AS1	PNPLA7	3.32e-07	green	green
THAP9-AS1	POLG2	0.00253	green	green
THAP9-AS1	POLM	3.88e-05	green	green
THAP9-AS1	POLR2J3	1.04e-05	green	green
THAP9-AS1	POLR2J4	4.99e-05	green	green
THAP9-AS1	POU5F1	7.54e-06	green	green
THAP9-AS1	PPIL6	4.74e-05	green	green
THAP9-AS1	PPM1J	1.09e-07	green	green
THAP9-AS1	PPP1R26.AS1	0.000114	green	NA
THAP9-AS1	PPP1R32	2.39e-05	green	green
THAP9-AS1	PPP1R3E	0.000115	green	green
THAP9-AS1	PPP2R3B	2.62e-06	green	green
THAP9-AS1	PPP2R5CP	2.13e-07	green	green
THAP9-AS1	PPP4R1.AS1	2.44e-09	green	NA
THAP9-AS1	PPT2.EGFL8	0.001421	green	NA
THAP9-AS1	PRANCR	0.000177	green	green
THAP9-AS1	PRICKLE4	7.41e-06	green	green
THAP9-AS1	PRKCZ.AS1	5.32e-05	green	NA
THAP9-AS1	PRKRIP1	0.000975	green	green
THAP9-AS1	PRMT5.AS1	3.52e-06	green	NA
THAP9-AS1	PROCA1	1.84e-06	green	green
THAP9-AS1	PRORSD1P	0.000121	green	green
THAP9-AS1	PROZ	5.08e-09	green	green
THAP9-AS1	PRR22	3.23e-06	green	green
THAP9-AS1	PRR5.ARHGAP8	3.99e-05	green	NA
THAP9-AS1	PRRT1	1.63e-08	green	green
THAP9-AS1	PRRT2	7.54e-07	green	green
THAP9-AS1	PRSS53	7.42e-05	green	green
THAP9-AS1	PSMA3.AS1	0.003296	green	NA
THAP9-AS1	PTGES2.AS1	3.27e-06	green	NA
THAP9-AS1	PTRH1	1.57e-06	green	green
THAP9-AS1	PVT1	1.38e-05	green	green
THAP9-AS1	PWP2	8.26e-09	green	green
THAP9-AS1	PYROXD2	1.86e-08	green	green
THAP9-AS1	PYY2	1.37e-08	green	green
THAP9-AS1	QRICH2	1.63e-06	green	green
THAP9-AS1	RAB17	3.91e-05	green	green
THAP9-AS1	RAB24	7.4e-05	green	green
THAP9-AS1	RABL2A	0.000754	green	green
THAP9-AS1	RAD51.AS1	0.000575	green	NA
THAP9-AS1	RAD51AP2	1.93e-06	green	green
THAP9-AS1	RAD52	0.000287	green	green
THAP9-AS1	RAD9A	0.000173	green	green
THAP9-AS1	RALGPS1	0.000663	green	green
THAP9-AS1	RANBP6	0.001208	green	green
THAP9-AS1	RAPSN	6.07e-09	green	green
THAP9-AS1	RB1.DT	6.55e-07	green	NA
THAP9-AS1	RBFADN	1.29e-06	green	green
THAP9-AS1	RBM14.RBM4	0.000466	green	NA
THAP9-AS1	RBM26.AS1	7.5e-06	green	NA
THAP9-AS1	RBM33	0.005527	green	green
THAP9-AS1	RBM39	0.003356	green	green
THAP9-AS1	RBM5	0.006531	green	green
THAP9-AS1	RBM6	0.002132	green	green
THAP9-AS1	RCCD1	5.09e-05	green	green
THAP9-AS1	RDH13	0.000433	green	green
THAP9-AS1	RECQL5	0.000792	green	green
THAP9-AS1	RELL2	2.02e-07	green	green
THAP9-AS1	RFLNA	1.75e-09	green	green
THAP9-AS1	RFPL3S	3.28e-06	green	green
THAP9-AS1	RGL2	3.07e-05	green	green
THAP9-AS1	RGS11	4.7e-10	green	green
THAP9-AS1	RHBDF1	6.77e-06	green	green
THAP9-AS1	RHBDL1	3.48e-09	green	green
THAP9-AS1	RHOG2P	1.65e-07	green	green
THAP9-AS1	RHOT1P1	2.75e-07	green	green
THAP9-AS1	RHOT2	5.59e-05	green	green
THAP9-AS1	RN7SL268P	2.19e-05	green	green
THAP9-AS1	RN7SL32P	6.14e-08	green	green
THAP9-AS1	RN7SL574P	5.05e-06	green	green
THAP9-AS1	RN7SL619P	6.74e-07	green	green
THAP9-AS1	RNA5SP203	5.39e-06	green	green
THAP9-AS1	RNF139.AS1	0.000145	green	NA
THAP9-AS1	RNF207	1.84e-07	green	green
THAP9-AS1	RNF32	3.76e-05	green	green
THAP9-AS1	RNF32.AS1	5.6e-06	green	NA
THAP9-AS1	RNPC3	0.002682	green	green
THAP9-AS1	RNU1.103P	8.28e-07	green	NA
THAP9-AS1	RNU1.153P	1.43e-06	green	NA
THAP9-AS1	RNU2.11P	5.79e-05	green	NA
THAP9-AS1	RNU2.22P	1.39e-06	green	NA
THAP9-AS1	RNU6.1065P	1.1e-07	green	NA
THAP9-AS1	RNU6.1095P	7.23e-06	green	NA
THAP9-AS1	RNU6.1223P	0.000103	green	NA
THAP9-AS1	RNU6.1238P	4.97e-08	green	NA
THAP9-AS1	RNU6.312P	2.07e-06	green	NA
THAP9-AS1	RNU6.322P	1.27e-07	green	NA
THAP9-AS1	RNU6.353P	6.82e-09	green	NA
THAP9-AS1	RNU6.45P	6.42e-08	green	NA
THAP9-AS1	RNU6.483P	1.2e-08	green	NA
THAP9-AS1	RNU6.678P	1.95e-07	green	NA
THAP9-AS1	RNU6.696P	2.29e-08	green	NA
THAP9-AS1	RNU6.833P	2.6e-08	green	NA
THAP9-AS1	RNU6.850P	4.5e-05	green	NA
THAP9-AS1	RNU6ATAC18P	9.53e-08	green	green
THAP9-AS1	RNY3P16	7.04e-08	green	green
THAP9-AS1	RNY4P10	7.45e-05	green	green
THAP9-AS1	ROCK1P1	5.63e-07	green	green
THAP9-AS1	ROGDI	2.63e-05	green	green
THAP9-AS1	RPARP.AS1	0.000113	green	NA
THAP9-AS1	RPL12P25	1.19e-05	green	green
THAP9-AS1	RPL13AP26	3.62e-06	green	green
THAP9-AS1	RPL21P94	1.07e-06	green	green
THAP9-AS1	RPL23AP21	1.19e-07	green	green
THAP9-AS1	RPL23AP5	1.52e-08	green	green
THAP9-AS1	RPL23AP66	1.24e-06	green	green
THAP9-AS1	RPL23P2	5.27e-06	green	green
THAP9-AS1	RPL31P34	2.77e-06	green	green
THAP9-AS1	RPL31P46	5.85e-05	green	green
THAP9-AS1	RPL32P3	0.002405	green	green
THAP9-AS1	RPL7AP26	9.32e-09	green	green
THAP9-AS1	RPL8P5	1.37e-05	green	green
THAP9-AS1	RPP38.DT	1.41e-05	green	NA
THAP9-AS1	RPS20P33	2.96e-05	green	green
THAP9-AS1	RPS24P10	1.76e-06	green	green
THAP9-AS1	RPS3AP53	5.84e-07	green	green
THAP9-AS1	RPS4XP16	9.26e-07	green	green
THAP9-AS1	RPSAP14	1.2e-05	green	green
THAP9-AS1	RPSAP69	1.78e-06	green	green
THAP9-AS1	RRP7BP	0.000268	green	green
THAP9-AS1	RSKR	4.62e-05	green	green
THAP9-AS1	RSPH10B	3.07e-07	green	green
THAP9-AS1	RSPH10B2	4.67e-09	green	green
THAP9-AS1	RSRP1	0.001054	green	green
THAP9-AS1	RTEL1.TNFRSF6B	2.49e-07	green	NA
THAP9-AS1	RUSC1.AS1	0.000252	green	NA
THAP9-AS1	SALL4	5.6e-08	green	green
THAP9-AS1	SAP25	8.07e-07	green	green
THAP9-AS1	SAPCD1	2.56e-05	green	green
THAP9-AS1	SCART1	1.6e-06	green	green
THAP9-AS1	SCAT8	2.52e-09	green	green
THAP9-AS1	SCLY	0.000443	green	green
THAP9-AS1	SCNN1D	3.49e-08	green	green
THAP9-AS1	SDHAP1	0.000469	green	green
THAP9-AS1	SDHAP2	8.33e-05	green	green
THAP9-AS1	SEC16B	8.39e-07	green	green
THAP9-AS1	SEC24B.AS1	0.000248	green	NA
THAP9-AS1	SEC31B	5.74e-05	green	green
THAP9-AS1	SEC61A2	0.000682	green	green
THAP9-AS1	SECISBP2	0.004393	green	green
THAP9-AS1	SEMA3B	2.17e-09	green	green
THAP9-AS1	SEMA3B.AS1	4.29e-07	green	NA
THAP9-AS1	SEMA3F.AS1	0.000143	green	NA
THAP9-AS1	SEPTIN7P2	0.003447	green	green
THAP9-AS1	SERHL2	0.000458	green	green
THAP9-AS1	SETD4	0.002659	green	green
THAP9-AS1	SETD5	0.004976	green	green
THAP9-AS1	SETD6	0.00038	green	green
THAP9-AS1	SFI1	0.000221	green	green
THAP9-AS1	SH2B1	0.00028	green	green
THAP9-AS1	SH3BP5.AS1	2.68e-05	green	NA
THAP9-AS1	SH3D21	6.81e-08	green	green
THAP9-AS1	SH3GLB2	3.8e-05	green	green
THAP9-AS1	SHROOM1	2.81e-06	green	green
THAP9-AS1	SIGIRR	6.14e-06	green	green
THAP9-AS1	SIRT7	1.85e-05	green	green
THAP9-AS1	SKOR1	2.37e-08	green	green
THAP9-AS1	SLC16A1.AS1	2.93e-05	green	NA
THAP9-AS1	SLC16A5	2.86e-07	green	green
THAP9-AS1	SLC22A18	1.48e-08	green	green
THAP9-AS1	SLC22A5	0.000339	green	green
THAP9-AS1	SLC23A3	9.8e-05	green	green
THAP9-AS1	SLC25A1P5	2.72e-08	green	green
THAP9-AS1	SLC25A21.AS1	2.11e-06	green	NA
THAP9-AS1	SLC25A27	0.00023	green	green
THAP9-AS1	SLC25A28	0.000114	green	green
THAP9-AS1	SLC25A29	1.36e-05	green	green
THAP9-AS1	SLC25A5.AS1	2.17e-06	green	NA
THAP9-AS1	SLC26A1	8.12e-05	green	green
THAP9-AS1	SLC26A6	4.54e-05	green	green
THAP9-AS1	SLC2A11	0.000172	green	green
THAP9-AS1	SLC35E2A	1.54e-05	green	green
THAP9-AS1	SLC44A3.AS1	7.36e-05	green	NA
THAP9-AS1	SLC4A5	8.49e-05	green	green
THAP9-AS1	SLC4A8	4.23e-08	green	green
THAP9-AS1	SLC5A10	5.73e-07	green	green
THAP9-AS1	SLC6A7	1.24e-07	green	green
THAP9-AS1	SLC9A5	8.73e-06	green	green
THAP9-AS1	SLX1A	1.05e-09	green	green
THAP9-AS1	SLX1A.SULT1A3	3.92e-05	green	NA
THAP9-AS1	SLX1B	1.18e-08	green	green
THAP9-AS1	SMC2.AS1	5.06e-07	green	NA
THAP9-AS1	SMCR2	2.47e-08	green	green
THAP9-AS1	SMG1P7	0.000726	green	green
THAP9-AS1	SMPD4BP	0.000707	green	green
THAP9-AS1	SNAI3.AS1	1.89e-06	green	NA
THAP9-AS1	SNHG1	0.001796	green	green
THAP9-AS1	SNHG12	0.000333	green	green
THAP9-AS1	SNHG20	0.001418	green	green
THAP9-AS1	SNHG21	1.07e-05	green	green
THAP9-AS1	SNHG3	0.000131	green	green
THAP9-AS1	SNORA15B.1	2.14e-08	green	NA
THAP9-AS1	SNORA59B	2.46e-05	green	green
THAP9-AS1	SNORD100	1.12e-05	green	green
THAP9-AS1	SNORD14A	0.000469	green	green
THAP9-AS1	SNORD51	2.94e-07	green	green
THAP9-AS1	SNORD7	2.78e-05	green	green
THAP9-AS1	SNRNP70	0.000558	green	green
THAP9-AS1	SNX15	0.0003	green	green
THAP9-AS1	SOCS2.AS1	1.96e-07	green	NA
THAP9-AS1	SOX9.AS1	1.01e-06	green	NA
THAP9-AS1	SPACA4	6.42e-07	green	green
THAP9-AS1	SPAG8	7.93e-06	green	green
THAP9-AS1	SPATA3.AS1	1.37e-08	green	NA
THAP9-AS1	SPATA32	9.96e-07	green	green
THAP9-AS1	SPATA41	1.05e-07	green	green
THAP9-AS1	SPATA6L	1.02e-05	green	green
THAP9-AS1	SPDYE6	3.5e-06	green	green
THAP9-AS1	SPEF2	3.65e-06	green	green
THAP9-AS1	SPG7	0.000524	green	green
THAP9-AS1	SPIRE2	3.31e-05	green	green
THAP9-AS1	SPPL2B	9.67e-05	green	green
THAP9-AS1	SPRN	0.000202	green	green
THAP9-AS1	SPTY2D1OS	0.00073	green	green
THAP9-AS1	SREBF2.AS1	0.000157	green	NA
THAP9-AS1	SRP14.AS1	9.91e-07	green	NA
THAP9-AS1	SRRM2.AS1	2.26e-06	green	NA
THAP9-AS1	SRRM5	5.11e-05	green	green
THAP9-AS1	SRSF5	0.001335	green	green
THAP9-AS1	ST20	1.05e-05	green	green
THAP9-AS1	ST6GALNAC4P1	2.58e-06	green	green
THAP9-AS1	STAC3	8.28e-06	green	green
THAP9-AS1	STAG3L5P	0.000534	green	green
THAP9-AS1	STAG3L5P.PVRIG2P.PILRB	0.000971	green	NA
THAP9-AS1	STAM.AS1	0.000105	green	NA
THAP9-AS1	STIMATE.MUSTN1	3.9e-06	green	NA
THAP9-AS1	STK36	0.00092	green	green
THAP9-AS1	STKLD1	1.8e-06	green	green
THAP9-AS1	STPG3	5.17e-07	green	green
THAP9-AS1	STPG3.AS1	4.35e-07	green	NA
THAP9-AS1	STRADA	0.000285	green	green
THAP9-AS1	STRCP1	4.67e-06	green	green
THAP9-AS1	STX16.NPEPL1	1.16e-05	green	NA
THAP9-AS1	SUGP2	0.005372	green	green
THAP9-AS1	SUGT1P4.STRA6LP	5.74e-07	green	NA
THAP9-AS1	SUGT1P4.STRA6LP.CCDC180	1.04e-07	green	NA
THAP9-AS1	SULT1A1	1.17e-09	green	green
THAP9-AS1	SULT1A3	7.11e-06	green	green
THAP9-AS1	TAF1C	0.000689	green	green
THAP9-AS1	TAF1D	0.007318	green	green
THAP9-AS1	TAMM41	0.002836	green	green
THAP9-AS1	TAPT1.AS1	1.85e-05	green	NA
THAP9-AS1	TARBP1	0.001638	green	green
THAP9-AS1	TARDBPP2	1.64e-08	green	green
THAP9-AS1	TAS2R38	4.92e-07	green	green
THAP9-AS1	TAS2R5	5.38e-05	green	green
THAP9-AS1	TBC1D29P	2.81e-07	green	green
THAP9-AS1	TBC1D3	1.89e-06	green	green
THAP9-AS1	TBC1D3B	7.68e-10	green	green
THAP9-AS1	TBC1D3D	2.78e-10	green	green
THAP9-AS1	TBILA	7.23e-06	green	green
THAP9-AS1	TBX19	0.000207	green	green
THAP9-AS1	TBX6	1.01e-08	green	green
THAP9-AS1	TCEA3	7.52e-07	green	green
THAP9-AS1	TCERG1	0.020258	green	green
THAP9-AS1	TCF24	2.71e-07	green	green
THAP9-AS1	TCIRG1	2.5e-07	green	green
THAP9-AS1	TEN1.CDK3	0.000105	green	NA
[truncated: 187 more rows]

## Sheet: ESCA_normal
gene1	gene2	correlation	module1	module2
[truncated: 1,113 more rows]

[truncated: 28 more sheets: ESCA_tumor, GBM_normal, GBM_tumor, HNSC_normal, HNSC_tumor, KICH_normal, KICH_tumor, KIRC_normal, KIRC_tumor, KIRP_normal, KIRP_tumor, LIHC_normal, LIHC_tumor, LUAD_normal, LUAD_tumor, LUSC_normal, LUSC_tumor, PAAD_tumor, PRAD_normal, PRAD_tumor …]
