# Supplementary material for: Pan-Cancer Analysis Reveals the Prognostic Potential of the THAP9/THAP9-AS1 Sense–Antisense Gene Pair in Human Cancers
Source: Noncoding RNA. 2022 Jul 8;8(4):51. doi: 10.3390/ncrna8040051 (PMC9326536; doi:10.3390/ncrna8040051)
Supplement: Supplementary file 1 [file ncrna-08-00051-s001.zip › Supplementary Table S10_1.xlsx]

## Sheet: BLCA
Gene1	Gene2	TCGA_BLCA.PrimarySolidTumor_cor	TCGA_BLCA.PrimarySolidTumor_pVal	TCGA_BLCA.SolidTissueNormal_cor	TCGA_BLCA.SolidTissueNormal_pVal	zScoreDiff	pValDiff	Classes
PMS2	THAP9	0.575629	0	0.966667	1.72e-11	5.27102	1.36e-07	#ERROR!
CDH10	THAP9	0.052732	0.28442	0.890364	3.27e-07	5.22539	1.74e-07	0/+
PRR12	THAP9	0.527892	0	0.95614	1.71e-10	4.99956	5.75e-07	#ERROR!
RCBTB2	THAP9	0.19448	6.8e-05	0.903509	1.16e-07	4.93233	8.13e-07	#ERROR!
CCDC8	THAP9	-0.09706	0.048431	0.821053	1.65e-05	4.7928	1.64e-06	-/+
CRYZL2P	THAP9	0.125194	0.010783	0.880702	6.49e-07	4.77613	1.79e-06	#ERROR!
ARL6IP5	THAP9	0.183711	0.000171	0.887719	3.97e-07	4.6702	3.01e-06	#ERROR!
DIPK1C	THAP9	-0.05877	0.232798	0.822246	1.56e-05	4.65993	3.16e-06	0/+
BDNF-AS	THAP9	0.444374	0	0.933743	5.27e-09	4.60893	4.05e-06	#ERROR!
LOC107984450	THAP9	0.032701	0.506991	0.843904	5.6e-06	4.58113	4.62e-06	0/+
DDX60	THAP9	0.178909	0.000253	0.880702	6.49e-07	4.56649	4.96e-06	#ERROR!
IFIT1	THAP9	-0.01765	0.720219	0.826316	1.3e-05	4.55137	5.33e-06	0/+
OSGEPL1	THAP9	0.524509	0	0.942105	1.72e-09	4.47455	7.66e-06	#ERROR!
RNF144A	THAP9	0.326123	1.03e-11	0.898246	1.79e-07	4.28651	1.82e-05	#ERROR!
LRRN3	THAP9	0.167976	0.000599	0.855639	3e-06	4.22045	2.44e-05	#ERROR!
NUAK1	THAP9	0.092107	0.061148	0.833333	9.4e-06	4.2179	2.47e-05	0/+
SMAD1	THAP9	0.417325	0	0.912281	5.31e-08	4.17951	2.92e-05	#ERROR!
INSIG2	THAP9	0.446708	0	0.917544	3.2e-08	4.16495	3.11e-05	#ERROR!
HPS3	THAP9	0.490985	0	0.925845	1.34e-08	4.15899	3.2e-05	#ERROR!
HLA-F-AS1	THAP9	0.125902	0.010342	0.838455	7.34e-06	4.15233	3.29e-05	#ERROR!
IFIT3	THAP9	-0.00589	0.904932	0.789474	5.84e-05	4.10104	4.11e-05	0/+
RBMS2	THAP9	0.208284	1.94e-05	0.85614	2.92e-06	4.0683	4.74e-05	#ERROR!
BATF2	THAP9	-0.08746	0.07548	0.752632	0.000201	4.06582	4.79e-05	0/+
SETDB2	THAP9	0.42213	0	0.907018	8.56e-08	4.04097	5.32e-05	#ERROR!
NYAP1	THAP9	0.192438	8.13e-05	0.848728	4.36e-06	4.02785	5.63e-05	#ERROR!
PARP11	THAP9	0.23361	1.54e-06	0.854386	3.22e-06	3.94191	8.08e-05	#ERROR!
OSR2	THAP9	0.042241	0.391298	0.791228	5.47e-05	3.93531	8.31e-05	0/+
RIN2	THAP9	0.132758	0.00683	0.822807	1.52e-05	3.93325	8.38e-05	#ERROR!
BRD8	THAP9	0.611512	0	0.940351	2.21e-09	3.92502	8.67e-05	#ERROR!
EEF1AKMT3	THAP9	0.354954	9.77e-14	0.884211	5.1e-07	3.90178	9.55e-05	#ERROR!
ATXN7L1	THAP9	0.528011	0	0.922807	1.86e-08	3.88878	0.000101	#ERROR!
BIVM	THAP9	0.491443	0	0.914035	4.5e-08	3.86332	0.000112	#ERROR!
SLC40A1	THAP9	0.157839	0.001273	0.824561	1.41e-05	3.85638	0.000115	#ERROR!
CNNM3	THAP9	0.50203	0	0.915314	3.98e-08	3.83958	0.000123	#ERROR!
FUT10	THAP9	0.315931	4.77e-11	0.870175	1.28e-06	3.83713	0.000124	#ERROR!
GCK	THAP9	0.062353	0.205481	0.786282	6.56e-05	3.80855	0.00014	0/+
EFCAB7	THAP9	0.603415	0	0.935088	4.45e-09	3.8076	0.00014	#ERROR!
EDA2R	THAP9	0.084658	0.085357	0.79333	5.06e-05	3.79448	0.000148	0/+
CYP39A1	THAP9	0.246902	3.63e-07	0.845614	5.13e-06	3.76761	0.000165	#ERROR!
MRPS27	THAP9	0.379696	1.33e-15	0.882456	5.76e-07	3.76232	0.000168	#ERROR!
LMAN2L	THAP9	0.353856	1.18e-13	0.875439	9.19e-07	3.7585	0.000171	#ERROR!
LINC01267	THAP9	0.076327	0.121001	0.78534	6.78e-05	3.74564	0.00018	0/+
KCNJ5	THAP9	-0.02643	0.591733	0.742105	0.000275	3.74148	0.000183	0/+
LRRC18	THAP9	0.083873	0.088306	0.786737	6.45e-05	3.73062	0.000191	0/+
LINC00638	THAP9	0.356405	7.62e-14	0.873079	1.07e-06	3.70923	0.000208	#ERROR!
FARSA-AS1	THAP9	0.35021	2.17e-13	-0.53904	0.017241	-3.69152	0.000223	#ERROR!
POFUT1	THAP9	0.401034	0	0.882456	5.76e-07	3.66636	0.000246	#ERROR!
DHFR2	THAP9	0.518064	0	0.910526	6.25e-08	3.64739	0.000265	#ERROR!
BBS2	THAP9	0.512002	0	0.908772	7.32e-08	3.64008	0.000273	#ERROR!
CHMP1B2P	THAP9	0.205174	2.59e-05	0.821413	1.62e-05	3.63258	0.000281	#ERROR!
MAPT-IT1	THAP9	0.238983	8.68e-07	-0.60622	0.005933	-3.60821	0.000308	#ERROR!
DHRS4-AS1	THAP9	0.517493	0	0.908293	7.64e-08	3.60115	0.000317	#ERROR!
LINC02550	THAP9	-0.03349	0.496767	0.721686	0.000486	3.60072	0.000317	0/+
LRRC6	THAP9	0.250631	2.38e-07	0.833699	9.24e-06	3.59843	0.00032	#ERROR!
ARRB1	THAP9	0.272987	1.65e-08	0.840351	6.69e-06	3.59164	0.000329	#ERROR!
RFX7	THAP9	0.493955	0	0.901754	1.34e-07	3.58392	0.000338	#ERROR!
RFC1	THAP9	0.538644	0	0.912281	5.31e-08	3.57805	0.000346	#ERROR!
IFIH1	THAP9	0.100435	0.041098	0.777193	9.04e-05	3.57331	0.000353	#ERROR!
HFE	THAP9	0.241165	6.85e-07	0.82807	1.2e-05	3.56754	0.00036	#ERROR!
LOC105378591	THAP9	0.180137	0.000229	-0.63431	0.003536	-3.54756	0.000389	#ERROR!
SIGLEC8	THAP9	-0.02714	0.581849	0.717612	0.000542	3.54428	0.000394	0/+
IRAK1BP1	THAP9	0.454316	0	0.889474	3.5e-07	3.54208	0.000397	#ERROR!
HMGN4	THAP9	0.481714	0	0.896491	2.05e-07	3.54041	0.000399	#ERROR!
HIBADH	THAP9	0.390521	0	0.87193	1.15e-06	3.53973	0.000401	#ERROR!
C9orf64	THAP9	0.448247	0	0.887719	3.97e-07	3.53934	0.000401	#ERROR!
C2orf42	THAP9	0.560733	0	0.915789	3.8e-08	3.53867	0.000402	#ERROR!
CDC40	THAP9	0.524441	0	0.907018	8.56e-08	3.53721	0.000404	#ERROR!
ANGEL2	THAP9	0.655998	0	0.936842	3.54e-09	3.52896	0.000417	#ERROR!
KLHL9	THAP9	0.463909	0	0.891228	3.07e-07	3.52801	0.000419	#ERROR!
GAL3ST4	THAP9	0.066297	0.178188	0.757895	0.00017	3.52523	0.000423	0/+
NR3C1	THAP9	0.050489	0.305436	0.750877	0.000212	3.52362	0.000426	0/+
KRT35	THAP9	0.031815	0.518569	-0.71267	0.000616	-3.52353	0.000426	0/-
SLC35A1	THAP9	0.353582	1.23e-13	0.859649	2.4e-06	3.51613	0.000438	#ERROR!
SLC7A6OS	THAP9	0.490325	0	0.897189	1.94e-07	3.51104	0.000446	#ERROR!
MLLT3	THAP9	0.355874	8.35e-14	0.859649	2.4e-06	3.50614	0.000455	#ERROR!
LINC01470	THAP9	0.213074	1.23e-05	-0.6061	0.005945	-3.5034	0.000459	#ERROR!
LOC100533629	THAP9	0.095666	0.051764	0.767448	0.000125	3.49959	0.000466	0/+
MICA	THAP9	0.152065	0.001917	0.789474	5.84e-05	3.49445	0.000475	#ERROR!
GPNMB	THAP9	0.011878	0.809593	0.729825	0.00039	3.49329	0.000477	0/+
GLG1	THAP9	0.239741	8e-07	0.821053	1.65e-05	3.48973	0.000484	#ERROR!
C17orf113	THAP9	0.54364	0	0.909092	7.12e-08	3.47988	0.000502	#ERROR!
MORN4	THAP9	0.335576	2.36e-12	0.850877	3.89e-06	3.46946	0.000522	#ERROR!
LINC01805	THAP9	0.122126	0.012893	-0.65578	0.002299	-3.46141	0.000537	#ERROR!
PLG	THAP9	0.133788	0.006406	0.778511	8.63e-05	3.45711	0.000546	#ERROR!
BTN2A3P	THAP9	0.476886	0	0.890552	3.23e-07	3.45199	0.000556	#ERROR!
KCNA7	THAP9	0.113914	0.02043	0.769431	0.000117	3.44772	0.000565	#ERROR!
PRUNE1	THAP9	0.571792	0	0.914035	4.5e-08	3.43558	0.000591	#ERROR!
HNMT	THAP9	0.197911	5.02e-05	0.8	3.92e-05	3.42308	0.000619	#ERROR!
GOPC	THAP9	0.460364	0	0.884211	5.1e-07	3.41895	0.000629	#ERROR!
LINC01343	THAP9	0.059203	0.229359	0.741563	0.000279	3.41018	0.000649	0/+
MIR6763	THAP9	0.24177	6.41e-07	0.813473	2.28e-05	3.3945	0.000688	#ERROR!
EBLN3P	THAP9	0.630436	0	0.926316	1.27e-08	3.39104	0.000696	#ERROR!
OGG1	THAP9	0.388411	2.22e-16	0.861404	2.17e-06	3.38793	0.000704	#ERROR!
FZD1	THAP9	0.228768	2.56e-06	0.807018	2.97e-05	3.37533	0.000737	#ERROR!
CMTR1	THAP9	0.482329	0	0.887719	3.97e-07	3.37349	0.000742	#ERROR!
PML	THAP9	0.02534	0.607176	0.719298	0.000518	3.35748	0.000787	0/+
BAIAP2-DT	THAP9	0.384197	4.44e-16	0.857895	2.65e-06	3.35556	0.000792	#ERROR!
KRBOX4	THAP9	0.507352	0	0.892982	2.69e-07	3.34397	0.000826	#ERROR!
LRRC37B	THAP9	0.65622	0	0.929825	8.47e-09	3.31975	0.000901	#ERROR!
FOXJ3	THAP9	0.592128	0	0.914035	4.5e-08	3.31835	0.000906	#ERROR!
HOXD12	THAP9	0.107449	0.028816	0.752199	0.000203	3.31665	0.000911	#ERROR!
IFI44L	THAP9	0.054618	0.267521	0.72807	0.000409	3.3159	0.000913	0/+
DYRK4	THAP9	0.091205	0.063738	0.74386	0.000261	3.30702	0.000943	0/+
PIK3C3	THAP9	0.471567	0	0.880702	6.49e-07	3.30396	0.000953	#ERROR!
ALG10B	THAP9	0.528399	0	0.896491	2.05e-07	3.30139	0.000962	#ERROR!
LRRC17	THAP9	0.032287	0.51239	0.714035	0.000595	3.28973	0.001003	0/+
LINC02421	THAP9	0.3785	1.55e-15	0.850844	3.9e-06	3.28143	0.001033	#ERROR!
MAGEL2	THAP9	0.030104	0.541321	0.711776	0.000631	3.28055	0.001036	0/+
BCL9	THAP9	0.592354	0	0.912281	5.31e-08	3.27677	0.00105	#ERROR!
CHROMR	THAP9	0.181676	0.000202	0.778947	8.5e-05	3.27411	0.00106	#ERROR!
GOLGA8N	THAP9	0.283505	4.31e-09	0.817544	1.92e-05	3.26993	0.001076	#ERROR!
ATF2	THAP9	0.497356	0	0.885965	4.51e-07	3.26681	0.001088	#ERROR!
RRAGB	THAP9	0.498535	0	0.885965	4.51e-07	3.26083	0.001111	#ERROR!
DHX57	THAP9	0.543038	0	0.898246	1.79e-07	3.25747	0.001124	#ERROR!
C1DP5	THAP9	0.124696	0.011103	0.752819	0.000199	3.25547	0.001132	#ERROR!
PPM1M	THAP9	0.128695	0.008753	0.754386	0.00019	3.2538	0.001139	#ERROR!
NMUR1	THAP9	-0.00574	0.907289	0.689474	0.001091	3.25017	0.001153	0/+
SCARNA17	THAP9	0.285007	3.54e-09	0.816346	2.02e-05	3.24997	0.001154	#ERROR!
PARP3	THAP9	0.178573	0.00026	0.773684	0.000102	3.23584	0.001213	#ERROR!
PRRT1	THAP9	0.297109	6.97e-10	0.819298	1.78e-05	3.23356	0.001223	#ERROR!
GDAP1	THAP9	0.269039	2.69e-08	0.808772	2.77e-05	3.23092	0.001234	#ERROR!
IFIT5	THAP9	0.169081	0.000551	0.768758	0.00012	3.22682	0.001252	#ERROR!
OSCP1	THAP9	0.380377	1.11e-15	0.847368	4.68e-06	3.2256	0.001257	#ERROR!
MSTN	THAP9	0.245244	4.37e-07	0.798425	4.17e-05	3.21668	0.001297	#ERROR!
BMP4	THAP9	0.250767	2.34e-07	0.8	3.92e-05	3.21087	0.001323	#ERROR!
RFX5	THAP9	0.411055	0	0.85614	2.92e-06	3.20876	0.001333	#ERROR!
CPLANE2	THAP9	0.35786	5.95e-14	0.838087	7.48e-06	3.20287	0.001361	#ERROR!
FCRL6	THAP9	-0.00527	0.914894	0.682756	0.001276	3.19999	0.001374	0/+
RNU11	THAP9	0.123668	0.011791	0.745803	0.000247	3.19846	0.001382	#ERROR!
RFLNA	THAP9	-0.15652	0.0014	0.592008	0.007577	3.19633	0.001392	-/+
HSPE1P27	THAP9	0.165641	0.000716	-0.58575	0.008408	-3.19554	0.001396	#ERROR!
ACSS3	THAP9	0.160692	0.001034	0.761404	0.000153	3.19207	0.001413	#ERROR!
NRG2	THAP9	0.177631	0.000281	0.768421	0.000121	3.19008	0.001422	#ERROR!
BTN3A3	THAP9	0.110304	0.024805	0.738596	0.000304	3.18895	0.001428	#ERROR!
KLHL7	THAP9	0.531102	0	0.891228	3.07e-07	3.18725	0.001436	#ERROR!
FGFR2	THAP9	0.262329	6.07e-08	0.801754	3.66e-05	3.18234	0.001461	#ERROR!
RPLP0P3	THAP9	0.218452	7.27e-06	-0.54533	0.015743	-3.17791	0.001483	#ERROR!
BBS4	THAP9	0.49134	0	0.878947	7.3e-07	3.17624	0.001492	#ERROR!
CBFA2T2	THAP9	0.643953	0	0.921053	2.24e-08	3.16759	0.001537	#ERROR!
FBXL4	THAP9	0.516789	0	0.885965	4.51e-07	3.16709	0.00154	#ERROR!
DVL2	THAP9	0.453401	0	0.866667	1.59e-06	3.16579	0.001547	#ERROR!
CEP162	THAP9	0.638017	0	0.919298	2.68e-08	3.16236	0.001565	#ERROR!
BCYRN1	THAP9	0.39525	0	-0.38894	0.099806	-3.15817	0.001588	#ERROR!
FAM13C	THAP9	0.371206	5.77e-15	0.838965	7.16e-06	3.15547	0.001602	#ERROR!
KLLN	THAP9	0.457362	0	0.867047	1.55e-06	3.15258	0.001618	#ERROR!
CTD-2297D10.2	THAP9	-0.04519	0.359019	0.653386	0.002416	3.14999	0.001633	0/+
DUSP26	THAP9	-0.02772	0.57385	0.663158	0.001968	3.14902	0.001638	0/+
SLC66A3	THAP9	0.20514	2.6e-05	0.775439	9.6e-05	3.14742	0.001647	#ERROR!
ORC3	THAP9	0.533622	0	0.889474	3.5e-07	3.14159	0.00168	#ERROR!
MTUS1	THAP9	0.408374	0	0.850373	4e-06	3.1402	0.001688	#ERROR!
CEP57	THAP9	0.583416	0	0.903509	1.16e-07	3.13842	0.001699	#ERROR!
APC2	THAP9	0.322796	1.71e-11	0.820018	1.72e-05	3.13359	0.001727	#ERROR!
PRG2	THAP9	-0.04414	0.370329	0.651285	0.002523	3.13203	0.001736	0/+
NUTM2D	THAP9	0.476734	0	0.871323	1.19e-06	3.12479	0.001779	#ERROR!
GPX8	THAP9	-0.06039	0.220147	0.640351	0.003142	3.12263	0.001792	0/+
OR7E100P	THAP9	0.1895	0.000105	-0.55533	0.013576	-3.11744	0.001824	#ERROR!
LOC101928295	THAP9	0.189524	0.000105	0.765174	0.000135	3.11312	0.001851	#ERROR!
FZD4	THAP9	0.201366	3.67e-05	0.770175	0.000115	3.11261	0.001854	#ERROR!
RNF13	THAP9	0.46496	0	0.866667	1.59e-06	3.10996	0.001871	#ERROR!
RN7SL749P	THAP9	0.017428	0.723667	0.682161	0.001293	3.10923	0.001876	0/+
EVC2	THAP9	0.051966	0.291486	0.7	0.000848	3.1076	0.001886	0/+
OR2B2	THAP9	0.151593	0.001981	-0.57975	0.009275	-3.10596	0.001897	#ERROR!
LOC105377623	THAP9	0.42278	0	0.85262	3.54e-06	3.10497	0.001903	#ERROR!
FAM9B	THAP9	0.172417	0.000425	0.756587	0.000178	3.1028	0.001917	#ERROR!
AFAP1L1	THAP9	0.144798	0.003148	0.744186	0.000259	3.10259	0.001918	#ERROR!
FAM41C	THAP9	0.335107	2.54e-12	-0.43326	0.063875	-3.09688	0.001956	#ERROR!
RSAD2	THAP9	0.037915	0.441653	0.691228	0.001047	3.09648	0.001958	0/+
SLFN12	THAP9	0.206989	2.19e-05	0.770513	0.000113	3.09342	0.001979	#ERROR!
AGPAT1	THAP9	0.359373	4.57e-14	0.829825	1.11e-05	3.09281	0.001983	#ERROR!
RPL31P60	THAP9	0.212446	1.3e-05	-0.53311	0.018755	-3.08827	0.002013	#ERROR!
FCF1	THAP9	0.395825	0	0.842105	6.13e-06	3.08622	0.002027	#ERROR!
CTDSP1	THAP9	0.199849	4.21e-05	0.766667	0.000129	3.08598	0.002029	#ERROR!
BLOC1S5	THAP9	0.53233	0	0.885965	4.51e-07	3.08536	0.002033	#ERROR!
PNMA8B	THAP9	-0.01635	0.740111	0.659939	0.002108	3.08385	0.002043	0/+
OLFML1	THAP9	-0.01344	0.785074	0.661404	0.002043	3.08267	0.002052	0/+
RN7SL834P	THAP9	0.316771	4.21e-11	0.812989	2.32e-05	3.07879	0.002078	#ERROR!
DNAJC10	THAP9	0.433921	0	0.854386	3.22e-06	3.07775	0.002086	#ERROR!
MAN2B2	THAP9	0.358413	5.4e-14	0.82807	1.2e-05	3.07563	0.002101	#ERROR!
LOC101930085	THAP9	0.547801	0	0.889864	3.4e-07	3.07234	0.002124	#ERROR!
MIR98	THAP9	0.271058	2.1e-08	-0.48335	0.036036	-3.06972	0.002143	#ERROR!
CYP27A1	THAP9	-0.02502	0.611779	0.652632	0.002454	3.06797	0.002155	0/+
GPAA1P2	THAP9	0.077697	0.114448	0.707291	0.000707	3.06415	0.002183	0/+
HES5	THAP9	0.075271	0.126245	0.705734	0.000735	3.0616	0.002202	0/+
LINC01011	THAP9	0.377345	1.78e-15	0.833699	9.24e-06	3.06147	0.002203	#ERROR!
SLFN5	THAP9	0.279504	7.23e-09	0.796491	4.49e-05	3.05618	0.002242	#ERROR!
CFL1P1	THAP9	0.375058	2.66e-15	0.832163	9.94e-06	3.0525	0.002269	#ERROR!
EPG5	THAP9	0.574514	0	0.896491	2.05e-07	3.04863	0.002299	#ERROR!
CACHD1	THAP9	0.230431	2.16e-06	0.775439	9.6e-05	3.04621	0.002317	#ERROR!
NR2F2	THAP9	0.40027	0	0.840351	6.69e-06	3.04321	0.002341	#ERROR!
PAXBP1-AS1	THAP9	0.535641	0	0.884109	5.13e-07	3.03506	0.002405	#ERROR!
SLC35A5	THAP9	0.518952	0	0.878947	7.3e-07	3.0349	0.002406	#ERROR!
LINC00886	THAP9	0.253587	1.7e-07	0.783832	7.16e-05	3.03404	0.002413	#ERROR!
NPAT	THAP9	0.559593	0	0.891228	3.07e-07	3.03265	0.002424	#ERROR!
RNLS	THAP9	0.209451	1.73e-05	0.764912	0.000136	3.03161	0.002433	#ERROR!
LANCL1	THAP9	0.418062	0	0.845614	5.13e-06	3.03109	0.002437	#ERROR!
MUC17	THAP9	0.12004	0.014529	-0.58712	0.008221	-3.026	0.002478	#ERROR!
POLH	THAP9	0.394855	0	0.836842	7.95e-06	3.02266	0.002506	#ERROR!
CABIN1	THAP9	0.462174	0	0.859649	2.4e-06	3.01856	0.00254	#ERROR!
LNPEP	THAP9	0.436125	0	0.850877	3.89e-06	3.0184	0.002541	#ERROR!
FLRT2	THAP9	-0.07566	0.124315	0.614035	0.005162	3.01568	0.002564	0/+
POLRMTP1	THAP9	0.213652	1.16e-05	-0.51823	0.023025	-3.01467	0.002573	#ERROR!
HTR2A	THAP9	-0.0628	0.202278	0.62072	0.004569	3.0076	0.002633	0/+
PARP2	THAP9	0.438696	0	0.850877	3.89e-06	3.00628	0.002645	#ERROR!
ANGEL1	THAP9	0.486137	0	0.866667	1.59e-06	3.00564	0.00265	#ERROR!
CCL4L2	THAP9	-0.14833	0.00248	0.564283	0.011844	3.0056	0.002651	-/+
RN7SL452P	THAP9	0.232075	1.81e-06	-0.50098	0.028893	-2.99975	0.002702	#ERROR!
DIO3	THAP9	-0.05401	0.272887	0.624561	0.004255	2.99792	0.002718	0/+
ICE2	THAP9	0.608144	0	0.903509	1.16e-07	2.99227	0.002769	#ERROR!
MAP10	THAP9	0.373591	3.55e-15	0.826678	1.28e-05	2.99201	0.002771	#ERROR!
LY6L	THAP9	-0.00149	0.975898	0.654068	0.002383	2.98782	0.00281	0/+
CTSO	THAP9	0.246043	3.99e-07	0.775439	9.6e-05	2.98312	0.002853	#ERROR!
PASD1	THAP9	0.09159	0.062624	0.703177	0.000784	2.97962	0.002886	0/+
CMTM5	THAP9	0.082472	0.093769	0.698288	0.000884	2.97802	0.002901	0/+
C16orf89	THAP9	0.043004	0.382794	0.677193	0.001448	2.97645	0.002916	0/+
LOC101930275	THAP9	0.34758	3.36e-13	0.815506	2.09e-05	2.97524	0.002928	#ERROR!
CLCC1	THAP9	0.588186	0	0.896491	2.05e-07	2.96991	0.002979	#ERROR!
NRDE2	THAP9	0.553773	0	0.885965	4.51e-07	2.96942	0.002984	#ERROR!
SLC6A19	THAP9	0.182369	0.000191	-0.53311	0.018755	-2.96897	0.002988	#ERROR!
CEP164	THAP9	0.44665	0	0.850877	3.89e-06	2.96858	0.002992	#ERROR!
GLI1	THAP9	-0.07852	0.110647	0.603509	0.006222	2.96292	0.003047	0/+
FAS	THAP9	-0.02732	0.579303	0.635088	0.003483	2.96253	0.003051	0/+
RSPH10B	THAP9	0.328573	7.05e-12	-0.40961	0.081583	-2.95924	0.003084	#ERROR!
CREBL2	THAP9	0.372561	4.44e-15	0.822807	1.52e-05	2.95043	0.003173	#ERROR!
GUCA1A	THAP9	-0.12372	0.011756	0.57138	0.010602	2.94994	0.003178	-/+
MYOZ3	THAP9	0.122025	0.012969	0.714035	0.000595	2.94539	0.003225	#ERROR!
SI	THAP9	0.176134	0.000317	-0.53311	0.018755	-2.94441	0.003236	#ERROR!
LPP-AS2	THAP9	0.319735	2.71e-11	0.801754	3.66e-05	2.94319	0.003249	#ERROR!
KLHL12	THAP9	0.518871	0	0.87319	1.06e-06	2.94093	0.003272	#ERROR!
ANKRD6	THAP9	0.394542	0	0.829825	1.11e-05	2.93652	0.003319	#ERROR!
PALD1	THAP9	-0.02908	0.555171	0.629825	0.003853	2.93579	0.003327	0/+
KIF26A	THAP9	0.037751	0.443638	0.668421	0.001757	2.93541	0.003331	0/+
HOXD10	THAP9	0.11147	0.023311	0.707018	0.000712	2.93215	0.003366	#ERROR!
CAMTA1-AS2	THAP9	0.099112	0.043853	-0.58477	0.008546	-2.93159	0.003372	#ERROR!
PURG	THAP9	0.165357	0.000731	0.733189	0.000355	2.93002	0.003389	#ERROR!
ITFG2	THAP9	0.495995	0	0.864912	1.77e-06	2.92942	0.003396	#ERROR!
C19orf44	THAP9	0.475576	0	0.857895	2.65e-06	2.9276	0.003416	#ERROR!
PPP2R5D	THAP9	0.411182	0	0.835088	8.65e-06	2.92615	0.003432	#ERROR!
MCMDC2	THAP9	0.568511	0	0.888011	3.89e-07	2.924	0.003456	#ERROR!
BRD7P2	THAP9	0.376614	2.22e-15	0.821825	1.59e-05	2.9209	0.00349	#ERROR!
NME5	THAP9	0.209748	1.69e-05	0.752415	0.000202	2.91817	0.003521	#ERROR!
LOC100422398	THAP9	0.208496	1.9e-05	-0.5035	0.02797	-2.91812	0.003521	#ERROR!
PWWP2A	THAP9	0.620595	0	0.903509	1.16e-07	2.91603	0.003545	#ERROR!
FKBP9	THAP9	0.165562	0.00072	0.731579	0.000371	2.91598	0.003546	#ERROR!
LOC100506289	THAP9	0.003799	0.938578	0.646181	0.002798	2.9156	0.00355	0/+
PRR5L	THAP9	-0.08336	0.09028	0.591228	0.007676	2.90869	0.003629	0/+
CX3CR1	THAP9	0.140656	0.004137	0.71849	0.00053	2.908	0.003638	#ERROR!
EVA1A	THAP9	-0.16556	0.00072	0.533802	0.018574	2.90658	0.003654	-/+
ENKUR	THAP9	0.14837	0.002474	0.721593	0.000488	2.90253	0.003702	#ERROR!
KHDC1	THAP9	0.082683	0.092929	0.688021	0.001129	2.90188	0.003709	0/+
FBXO36	THAP9	0.278332	8.4e-09	0.780702	8e-05	2.90179	0.00371	#ERROR!
GLCE	THAP9	0.383947	4.44e-16	0.822807	1.52e-05	2.89978	0.003734	#ERROR!
PTTG3P	THAP9	0.247492	3.4e-07	-0.46813	0.04324	-2.89844	0.00375	#ERROR!
KLHL33	THAP9	0.118397	0.015943	0.705936	0.000732	2.89717	0.003765	#ERROR!
RN7SKP22	THAP9	0.202923	3.19e-05	-0.5035	0.02797	-2.89594	0.00378	#ERROR!
EIF3KP1	THAP9	0.033728	0.493731	0.660245	0.002094	2.89498	0.003792	0/+
SLC6A2	THAP9	-0.02891	0.557437	0.62308	0.004374	2.89284	0.003818	0/+
ANKRD46	THAP9	0.56795	0	0.885965	4.51e-07	2.89058	0.003845	#ERROR!
MVB12B	THAP9	0.337262	1.8e-12	0.803509	3.42e-05	2.88708	0.003888	#ERROR!
SEMA6D	THAP9	0.2342	1.45e-06	0.759649	0.000161	2.8845	0.00392	#ERROR!
PHF12	THAP9	0.625993	0	0.903509	1.16e-07	2.88238	0.003947	#ERROR!
LOC101928565	THAP9	0.268483	2.88e-08	-0.4468	0.055134	-2.88133	0.00396	#ERROR!
CFH	THAP9	-0.03171	0.519985	0.619298	0.00469	2.88003	0.003976	0/+
MIR196A1	THAP9	0.1599	0.001096	0.724166	0.000455	2.87805	0.004001	#ERROR!
LOC100379224	THAP9	0.333551	3.24e-12	0.801072	3.76e-05	2.87696	0.004015	#ERROR!
KANK4	THAP9	-0.07411	0.132205	0.591129	0.007689	2.87265	0.00407	0/+
MRC2	THAP9	-0.12524	0.010756	0.55614	0.013411	2.87066	0.004096	-/+
RRM2B	THAP9	0.336717	1.96e-12	0.801754	3.66e-05	2.87064	0.004096	#ERROR!
SBF2-AS1	THAP9	0.363857	2.09e-14	0.812281	2.39e-05	2.86779	0.004134	#ERROR!
RNU4-39P	THAP9	0.344526	5.56e-13	0.804544	3.28e-05	2.86692	0.004145	#ERROR!
PLA2R1	THAP9	0.22329	4.48e-06	0.752632	0.000201	2.86592	0.004158	#ERROR!
OLFML3	THAP9	-0.13879	0.004666	0.545614	0.015677	2.86565	0.004162	-/+
EIF1B-AS1	THAP9	0.348601	2.84e-13	0.80597	3.1e-05	2.86473	0.004174	#ERROR!
PDCD7	THAP9	0.514092	0	0.866667	1.59e-06	2.86352	0.00419	#ERROR!
HAUS6	THAP9	0.473521	0	0.852632	3.54e-06	2.86299	0.004197	#ERROR!
DAG1	THAP9	0.411096	0	0.829825	1.11e-05	2.8612	0.00422	#ERROR!
GALNT2	THAP9	0.150918	0.002076	0.717544	0.000543	2.86059	0.004229	#ERROR!
CDAN1	THAP9	0.520575	0	0.868421	1.43e-06	2.85681	0.004279	#ERROR!
KBTBD3	THAP9	0.403887	0	0.826678	1.28e-05	2.85595	0.004291	#ERROR!
ASCC1	THAP9	0.327242	8.66e-12	0.796491	4.49e-05	2.85571	0.004294	#ERROR!
RHBDD1	THAP9	0.332066	4.1e-12	0.798246	4.2e-05	2.85344	0.004325	#ERROR!
ATOH8	THAP9	0.110438	0.02463	0.695919	0.000936	2.85285	0.004333	#ERROR!
EPHA4	THAP9	0.203985	2.89e-05	0.742105	0.000275	2.85212	0.004343	#ERROR!
EPM2AIP1	THAP9	0.644127	0	0.907416	8.26e-08	2.8492	0.004383	#ERROR!
PIP4K2B	THAP9	0.53264	0	0.87193	1.15e-06	2.84826	0.004396	#ERROR!
ACTBL2	THAP9	-0.08661	0.078381	0.577417	0.009631	2.84122	0.004494	0/+
HEXA	THAP9	0.248901	2.9e-07	0.761404	0.000153	2.84085	0.004499	#ERROR!
OPTN	THAP9	0.050139	0.308803	0.661404	0.002043	2.84016	0.004509	0/+
DMRTC2	THAP9	0.149168	0.002342	-0.53311	0.018755	-2.83883	0.004528	#ERROR!
PRXL2B	THAP9	0.298462	5.78e-10	0.782456	7.52e-05	2.83528	0.004579	#ERROR!
DNMT3L	THAP9	0.227743	2.85e-06	-0.4714	0.041605	-2.83466	0.004587	#ERROR!
BTN3A1	THAP9	0.208538	1.89e-05	0.742105	0.000275	2.83399	0.004597	#ERROR!
MIR6774	THAP9	0.070047	0.154826	0.671544	0.001641	2.83354	0.004604	0/+
CST8	THAP9	0.110062	0.025125	-0.55988	0.012672	-2.83271	0.004615	#ERROR!
LOC105372482	THAP9	0.376279	2.22e-15	0.814035	2.23e-05	2.83266	0.004616	#ERROR!
C3orf33	THAP9	0.38087	8.88e-16	0.815789	2.07e-05	2.83214	0.004624	#ERROR!
GUCY1A1	THAP9	0.103856	0.034645	0.689474	0.001091	2.831	0.00464	#ERROR!
FZD4-DT	THAP9	0.246595	3.76e-07	0.75927	0.000163	2.83094	0.004641	#ERROR!
ETFBKMT	THAP9	0.529285	0	0.86968	1.32e-06	2.83058	0.004646	#ERROR!
HAR1B	THAP9	-0.07713	0.117127	0.581545	0.009009	2.82855	0.004676	0/+
LACTB2	THAP9	0.442052	0	0.838596	7.29e-06	2.82691	0.0047	#ERROR!
LOC102724593	THAP9	0.226845	3.12e-06	0.749787	0.000219	2.82675	0.004702	#ERROR!
IFIT2	THAP9	0.044517	0.366268	0.65614	0.002282	2.82619	0.004711	0/+
FOLR1	THAP9	0.146316	0.002844	0.710706	0.000648	2.82533	0.004723	#ERROR!
FAM210B	THAP9	0.386903	4.44e-16	0.817544	1.92e-05	2.82525	0.004724	#ERROR!
OR2W3	THAP9	0.006652	0.892661	0.633486	0.003592	2.82279	0.004761	0/+
RNU1-91P	THAP9	0.149497	0.00229	-0.52982	0.01964	-2.82263	0.004763	#ERROR!
IRF2	THAP9	0.496668	0	0.857895	2.65e-06	2.82231	0.004768	#ERROR!
CLIC5	THAP9	0.006914	0.888461	0.633333	0.003603	2.82081	0.00479	0/+
FAM185A	THAP9	0.467533	0	0.847368	4.68e-06	2.82	0.004802	#ERROR!
DIO3OS	THAP9	-0.04293	0.383617	0.601754	0.006415	2.81624	0.004859	0/+
SLC25A42	THAP9	0.454746	0	0.842105	6.13e-06	2.81186	0.004926	#ERROR!
C14orf93	THAP9	0.539827	0	0.87193	1.15e-06	2.80981	0.004957	#ERROR!
LOC101927392	THAP9	-0.08539	0.082673	0.572561	0.010406	2.80891	0.004971	0/+
SMARCAL1	THAP9	0.292695	1.27e-09	0.777193	9.04e-05	2.80817	0.004982	#ERROR!
COG1	THAP9	0.566412	0	0.880702	6.49e-07	2.80791	0.004986	#ERROR!
MR1	THAP9	0.273181	1.61e-08	0.768421	0.000121	2.806	0.005016	#ERROR!
C8orf31	THAP9	0.162991	0.000873	0.716418	0.000559	2.80458	0.005038	#ERROR!
LINC01139	THAP9	-0.01841	0.708825	0.614778	0.005093	2.80148	0.005087	0/+
SERPING1	THAP9	-0.1901	9.95e-05	0.494737	0.031283	2.80062	0.0051	-/+
ATP23	THAP9	0.392088	0	0.817384	1.93e-05	2.80012	0.005108	#ERROR!
RPS2P13	THAP9	0.224751	3.87e-06	-0.4665	0.044076	-2.79866	0.005132	#ERROR!
SLC66A1L	THAP9	0.059242	0.229051	0.659939	0.002108	2.79545	0.005183	0/+
SEC1P	THAP9	0.292972	1.23e-09	0.775924	9.44e-05	2.79483	0.005193	#ERROR!
LEPROT	THAP9	0.320835	2.3e-11	0.787719	6.23e-05	2.79324	0.005218	#ERROR!
KRTAP17-1	THAP9	0.132442	0.006964	-0.53558	0.018112	-2.78695	0.005321	#ERROR!
NANOS2	THAP9	0.178478	0.000262	-0.50098	0.028893	-2.78641	0.00533	#ERROR!
GPANK1	THAP9	0.369138	8.22e-15	0.807018	2.97e-05	2.78629	0.005331	#ERROR!
OR6S1	THAP9	0.075646	0.12436	-0.57509	0.009997	-2.78588	0.005338	0/-
SLC25A20	THAP9	0.14598	0.002909	0.705263	0.000744	2.78505	0.005352	#ERROR!
IQCA1	THAP9	-0.01239	0.801495	0.615789	0.005001	2.78475	0.005357	0/+
PLAG1	THAP9	0.233373	1.58e-06	0.747696	0.000233	2.78235	0.005397	#ERROR!
PTPRD	THAP9	0.00587	0.90522	0.626316	0.004117	2.78046	0.005428	0/+
AKAP10	THAP9	0.500074	0	0.85614	2.92e-06	2.77985	0.005438	#ERROR!
GIMAP8	THAP9	0.009591	0.845735	0.62807	0.003983	2.7773	0.005481	0/+
LINC01852	THAP9	0.023577	0.632415	0.636205	0.003408	2.77562	0.00551	0/+
EIF2D	THAP9	0.426262	0	0.828434	1.18e-05	2.77413	0.005535	#ERROR!
DHX58	THAP9	0.243057	5.56e-07	0.750877	0.000212	2.77086	0.005591	#ERROR!
NOTCH1	THAP9	0.174185	0.00037	0.717544	0.000543	2.76949	0.005614	#ERROR!
PRIMPOL	THAP9	0.594824	0	0.887719	3.97e-07	2.76712	0.005655	#ERROR!
C6orf89	THAP9	0.413433	0	0.822807	1.52e-05	2.76613	0.005673	#ERROR!
IFNL2	THAP9	-0.01787	0.717012	0.608986	0.00565	2.76412	0.005708	0/+
RNA5SP450	THAP9	0.23688	1.09e-06	-0.44878	0.053938	-2.76206	0.005744	#ERROR!
RPAP1	THAP9	0.469817	0	0.84386	5.61e-06	2.76191	0.005746	#ERROR!
LOC105378516	THAP9	-0.03355	0.496003	0.598487	0.006787	2.76098	0.005763	0/+
BHLHA9	THAP9	0.084585	0.085628	-0.56429	0.011843	-2.75922	0.005794	0/-
C7orf31	THAP9	0.424023	0	0.826316	1.3e-05	2.75896	0.005799	#ERROR!
CYP27C1	THAP9	-0.11328	0.021147	0.54386	0.016083	2.75731	0.005828	-/+
LOC102724265	THAP9	0.035166	0.475489	0.640008	0.003164	2.75586	0.005854	0/+
RIMBP2	THAP9	-0.03743	0.447509	0.594998	0.007203	2.75513	0.005867	0/+
QRFPR	THAP9	0.107411	0.028873	0.680451	0.001345	2.7525	0.005914	#ERROR!
LINC02570	THAP9	0.112792	0.021711	-0.54329	0.016216	-2.75236	0.005917	#ERROR!
CLN5	THAP9	0.266746	3.56e-08	0.759649	0.000161	2.75212	0.005921	#ERROR!
KDM4A	THAP9	0.530832	0	0.864912	1.77e-06	2.74905	0.005977	#ERROR!
NSL1	THAP9	0.506155	0	0.85614	2.92e-06	2.74882	0.005981	#ERROR!
BNIP3P39	THAP9	0.399912	0	-0.28899	0.230156	-2.74822	0.005992	#ERROR!
HIC1	THAP9	-0.101	0.039976	0.550877	0.014508	2.74813	0.005994	-/+
GIMAP7	THAP9	-0.02133	0.665219	0.603509	0.006222	2.74432	0.006064	0/+
AZIN2	THAP9	-0.01838	0.709184	0.605263	0.006034	2.74362	0.006077	0/+
RAB36	THAP9	0.337219	1.81e-12	0.789474	5.84e-05	2.74089	0.006127	#ERROR!
CEP192	THAP9	0.648073	0	0.903509	1.16e-07	2.74071	0.006131	#ERROR!
RPL32P27	THAP9	0.024719	0.616008	0.631122	0.003759	2.73889	0.006165	0/+
FBXL5	THAP9	0.456403	0	0.836842	7.95e-06	2.73595	0.00622	#ERROR!
HSPA8P15	THAP9	0.544954	0	-0.10603	0.665739	-2.73525	0.006233	#ERROR!
FRMD4A	THAP9	0.282597	4.85e-09	0.764912	0.000136	2.73466	0.006244	#ERROR!
LINC00605	THAP9	0.073858	0.13354	0.659037	0.002148	2.73341	0.006268	0/+
RAD52	THAP9	0.618438	0	0.893374	2.61e-07	2.72886	0.006355	#ERROR!
DFFA	THAP9	0.477224	0	0.84386	5.61e-06	2.72551	0.00642	#ERROR!
MYF6	THAP9	0.093211	0.058098	0.668722	0.001746	2.72513	0.006428	0/+
DDX58	THAP9	0.128138	0.009051	0.687719	0.001137	2.72446	0.006441	#ERROR!
ITGBL1	THAP9	-0.04572	0.353423	0.584211	0.008625	2.72375	0.006454	0/+
RNF26	THAP9	0.298063	6.11e-10	0.770175	0.000115	2.71911	0.006546	#ERROR!
C11orf87	THAP9	-0.06258	0.203847	0.571934	0.01051	2.71791	0.00657	0/+
APLP2	THAP9	0.371758	5.11e-15	0.801754	3.66e-05	2.71788	0.00657	#ERROR!
PSKH1	THAP9	0.370615	6.22e-15	0.801229	3.74e-05	2.71733	0.006581	#ERROR!
GIMAP6	THAP9	0.016709	0.734634	0.622807	0.004396	2.71721	0.006584	0/+
MIR576	THAP9	0.199055	4.53e-05	-0.47059	0.042008	-2.71609	0.006606	#ERROR!
LOC441666	THAP9	0.318713	3.15e-11	0.778947	8.5e-05	2.71571	0.006613	#ERROR!
IGHD3-9	THAP9	-0.04968	0.313308	0.580008	0.009236	2.71463	0.006635	0/+
ATIC	THAP9	0.161562	0.00097	0.703509	0.000777	2.71094	0.006709	#ERROR!
COPS8	THAP9	0.218066	7.55e-06	0.731579	0.000371	2.70815	0.006766	#ERROR!
FRS3	THAP9	0.348993	2.66e-13	0.791228	5.47e-05	2.70784	0.006772	#ERROR!
FLJ46284	THAP9	0.48607	0	0.845716	5.1e-06	2.70633	0.006803	#ERROR!
EIF4BP8	THAP9	0.06936	0.158922	0.652324	0.00247	2.70575	0.006815	0/+
RNF220	THAP9	0.396241	0	0.810526	2.58e-05	2.70391	0.006853	#ERROR!
RNU7-120P	THAP9	0.114382	0.019915	-0.53311	0.018755	-2.70388	0.006854	#ERROR!
KCNE3	THAP9	0.226077	3.38e-06	0.734533	0.000342	2.70037	0.006926	#ERROR!
PPT1	THAP9	0.280501	6.36e-09	0.759649	0.000161	2.69545	0.007029	#ERROR!
ELP3	THAP9	0.343935	6.13e-13	0.787719	6.23e-05	2.69425	0.007055	#ERROR!
RSPO1	THAP9	-0.03347	0.497071	0.5871	0.008223	2.69374	0.007066	0/+
PANK4	THAP9	0.49793	0	0.849123	4.27e-06	2.69275	0.007087	#ERROR!
MTATP6P17	THAP9	0.110929	0.023994	-0.53311	0.018755	-2.69055	0.007133	#ERROR!
GOLGA6L2	THAP9	-0.00281	0.954613	-0.60965	0.005584	-2.68934	0.007159	0/-
LINC00092	THAP9	0.011938	0.808646	0.615182	0.005056	2.68828	0.007182	0/+
LOC642366	THAP9	0.031422	0.523756	0.627142	0.004053	2.6882	0.007184	0/+
CADPS2	THAP9	0.370149	6.88e-15	0.798246	4.2e-05	2.68784	0.007192	#ERROR!
PCOLCE-AS1	THAP9	0.23111	2.01e-06	0.73504	0.000337	2.68433	0.007268	#ERROR!
GBP4	THAP9	0.075666	0.124262	0.652632	0.002454	2.68363	0.007283	0/+
AUTS2	THAP9	0.281543	5.56e-09	0.75856	0.000167	2.68134	0.007333	#ERROR!
GYS2	THAP9	0.194162	6.99e-05	-0.46727	0.043676	-2.6805	0.007351	#ERROR!
PHYHD1	THAP9	-0.00389	0.93718	0.603509	0.006222	2.67782	0.00741	0/+
CMPK2	THAP9	0.176923	0.000297	0.707018	0.000712	2.67727	0.007422	#ERROR!
CACNA2D3-AS1	THAP9	0.190269	9.81e-05	-0.46967	0.042466	-2.67678	0.007433	#ERROR!
PSAP	THAP9	0.074505	0.130162	0.650877	0.002544	2.67646	0.007441	0/+
DISC1	THAP9	0.229917	2.27e-06	0.733333	0.000353	2.67502	0.007472	#ERROR!
P4HA2-AS1	THAP9	0.167076	0.000642	0.70098	0.000827	2.67032	0.007578	#ERROR!
NBR1	THAP9	0.616338	0	0.889474	3.5e-07	2.66939	0.007599	#ERROR!
GPALPP1	THAP9	0.550686	0	0.866667	1.59e-06	2.66878	0.007613	#ERROR!
RPL21P117	THAP9	0.094777	0.053988	0.661121	0.002056	2.66717	0.007649	0/+
C18orf32	THAP9	0.517268	0	0.854386	3.22e-06	2.66653	0.007664	#ERROR!
CTRB2	THAP9	0.104721	0.033157	-0.53298	0.018791	-2.66588	0.007679	#ERROR!
NOS2	THAP9	0.14363	0.003403	0.687719	0.001137	2.66429	0.007715	#ERROR!
LOC440895	THAP9	0.041468	0.400035	0.629428	0.003882	2.66426	0.007716	0/+
PRICKLE1	THAP9	-0.04068	0.409021	0.577193	0.009665	2.66415	0.007718	0/+
CMBL	THAP9	0.187351	0.000126	0.710526	0.000651	2.66303	0.007744	#ERROR!
RPL21P124	THAP9	0.103787	0.034766	-0.53311	0.018755	-2.66301	0.007745	#ERROR!
PSEN2	THAP9	0.226009	3.4e-06	0.729825	0.00039	2.66196	0.007769	#ERROR!
MANEA	THAP9	0.467172	0	0.835088	8.65e-06	2.66157	0.007778	#ERROR!
RPLP0P11	THAP9	0.053996	0.273024	0.636396	0.003395	2.66071	0.007798	0/+
RNU6-230P	THAP9	0.281519	5.57e-09	-0.3873	0.101368	-2.66034	0.007806	#ERROR!
CYYR1	THAP9	0.174533	0.00036	0.703509	0.000777	2.66006	0.007813	#ERROR!
LOC100133316	THAP9	0.104097	0.034225	-0.53229	0.018973	-2.65982	0.007818	#ERROR!
C8orf89	THAP9	0.036232	0.462204	0.625507	0.00418	2.65959	0.007823	0/+
NEK3	THAP9	0.316948	4.1e-11	0.772269	0.000107	2.6593	0.00783	#ERROR!
ATF7IP	THAP9	0.598265	0	0.882456	5.76e-07	2.65413	0.007951	#ERROR!
RNU6-37P	THAP9	0.230447	2.15e-06	-0.43143	0.065134	-2.6541	0.007952	#ERROR!
MMP11	THAP9	-0.07393	0.133148	0.552632	0.014135	2.65379	0.007959	0/+
SLC24A1	THAP9	0.52461	0	0.85614	2.92e-06	2.65303	0.007977	#ERROR!
COL1A2	THAP9	-0.11509	0.019161	0.522807	0.021637	2.65213	0.007999	-/+
RAB3IL1	THAP9	-0.14068	0.00413	0.503509	0.027966	2.65145	0.008015	-/+
PRPH	THAP9	-0.05672	0.249539	0.5639	0.011915	2.65029	0.008042	0/+
POMT2	THAP9	0.338417	1.5e-12	0.780702	8e-05	2.64857	0.008083	#ERROR!
CRX	THAP9	0.144454	0.003221	-0.49969	0.029375	-2.64668	0.008129	#ERROR!
SEPTIN2	THAP9	0.375608	2.66e-15	0.796491	4.49e-05	2.64531	0.008162	#ERROR!
CABCOCO1	THAP9	0.128757	0.00872	0.67691	0.001457	2.64496	0.00817	#ERROR!
JADE2	THAP9	0.241107	6.89e-07	0.735088	0.000336	2.64437	0.008184	#ERROR!
LOC101928035	THAP9	0.351878	1.64e-13	-0.31461	0.189573	-2.64237	0.008233	#ERROR!
RN7SL141P	THAP9	0.098376	0.04545	-0.53311	0.018755	-2.64217	0.008238	#ERROR!
NCAM2	THAP9	-0.02166	0.660285	0.585965	0.008379	2.64211	0.008239	0/+
RNA5SP465	THAP9	0.302471	3.31e-10	-0.3631	0.126517	-2.64031	0.008283	#ERROR!
RPS10P8	THAP9	0.148288	0.002488	0.686754	0.001163	2.63918	0.008311	#ERROR!
RPS27L	THAP9	0.146868	0.00274	0.685965	0.001185	2.63903	0.008314	#ERROR!
MC5R	THAP9	0.196307	5.79e-05	-0.45694	0.049205	-2.63892	0.008317	#ERROR!
ARHGEF3-AS1	THAP9	0.218376	7.32e-06	-0.43836	0.060472	-2.63822	0.008334	#ERROR!
PCMTD1	THAP9	0.601062	0	0.882456	5.76e-07	2.63748	0.008352	#ERROR!
FAM50B	THAP9	-0.02539	0.606406	0.582456	0.008876	2.63603	0.008388	0/+
EIF2AK3-DT	THAP9	0.54722	0	0.863158	1.96e-06	2.6346	0.008424	#ERROR!
SEMA4F	THAP9	0.28762	2.51e-09	0.75614	0.00018	2.63451	0.008426	#ERROR!
LINC02381	THAP9	0.103834	0.034683	0.661404	0.002043	2.63422	0.008433	#ERROR!
ACTRT1	THAP9	0.190726	9.43e-05	-0.46035	0.047327	-2.63325	0.008457	#ERROR!
ATAD1	THAP9	0.403646	0	0.807018	2.97e-05	2.63164	0.008497	#ERROR!
SLCO1B3	THAP9	-0.07608	0.122191	0.546287	0.015524	2.62739	0.008604	0/+
LINC02668	THAP9	0.187001	0.00013	0.705661	0.000737	2.62723	0.008608	#ERROR!
LINC02426	THAP9	0.095435	0.052335	-0.53229	0.018973	-2.62647	0.008628	0/-
FGF13	THAP9	0.125223	0.010764	0.672225	0.001617	2.62588	0.008643	#ERROR!
CDIP1	THAP9	-0.03842	0.435605	0.57193	0.010511	2.62556	0.008651	0/+
HEXB	THAP9	0.141282	0.003971	0.680702	0.001337	2.62313	0.008713	#ERROR!
PINLYP	THAP9	0.025598	0.603522	0.612549	0.005302	2.62009	0.008791	0/+
ARHGEF40	THAP9	0.317908	3.56e-11	0.768421	0.000121	2.61915	0.008815	#ERROR!
ECI2	THAP9	0.129646	0.008264	0.673684	0.001565	2.61891	0.008821	#ERROR!
ERMAP	THAP9	0.48108	0	0.836842	7.95e-06	2.61539	0.008913	#ERROR!
SMARCAD1	THAP9	0.732418	0	0.924561	1.54e-08	2.61343	0.008964	#ERROR!
FAM133FP	THAP9	0.289134	2.05e-09	-0.36963	0.119337	-2.61334	0.008966	#ERROR!
CHST14	THAP9	0.241676	6.48e-07	0.731579	0.000371	2.61313	0.008972	#ERROR!
MMP14	THAP9	-0.08001	0.104028	0.540351	0.016919	2.61035	0.009045	0/+
LINC01273	THAP9	0.194891	6.56e-05	0.707328	0.000706	2.6087	0.009089	#ERROR!
GAB3	THAP9	-0.04292	0.383703	0.564912	0.01173	2.60324	0.009235	0/+
PIGR	THAP9	0.107777	0.028329	0.659061	0.002147	2.60319	0.009236	#ERROR!
PTCH1	THAP9	0.501866	0	0.84386	5.61e-06	2.60197	0.009269	#ERROR!
FRMPD4	THAP9	0.023411	0.634806	0.608085	0.005741	2.60131	0.009287	0/+
PRTG	THAP9	0.329821	5.81e-12	0.77193	0.000108	2.6013	0.009287	#ERROR!
PCDHA7	THAP9	0.177548	0.000283	0.696848	0.000915	2.5984	0.009366	#ERROR!
NAV3	THAP9	-0.00709	0.885656	0.587719	0.008139	2.59674	0.009411	0/+
ID2	THAP9	0.285796	3.19e-09	0.750877	0.000212	2.59567	0.009441	#ERROR!
RTTN	THAP9	0.394946	0	0.8	3.92e-05	2.59561	0.009442	#ERROR!
LOC107984969	THAP9	0.489182	0	-0.14494	0.553819	-2.59557	0.009443	#ERROR!
CDO1	THAP9	0.026517	0.590568	0.609039	0.005645	2.59524	0.009452	0/+
DNAJB5-DT	THAP9	0.172163	0.000434	-0.46748	0.043569	-2.59475	0.009466	#ERROR!
RNU5F-1	THAP9	0.215961	9.28e-06	0.716332	0.00056	2.59443	0.009475	#ERROR!
BNIP3P17	THAP9	0.381499	8.88e-16	0.793836	4.97e-05	2.59158	0.009554	#ERROR!
GIMAP2	THAP9	0.118569	0.01579	0.663158	0.001968	2.58926	0.009618	#ERROR!
MAGI1-AS1	THAP9	0.17148	0.000457	0.692341	0.00102	2.58906	0.009624	#ERROR!
LOC283683	THAP9	0.171727	0.000449	0.692444	0.001017	2.58884	0.00963	#ERROR!
EIF2AK2	THAP9	0.442675	0	0.819298	1.78e-05	2.5886	0.009637	#ERROR!
PCDHB11	THAP9	0.0768	0.118707	0.638596	0.003253	2.58754	0.009666	0/+
CD40	THAP9	-0.00125	0.979809	0.589474	0.007905	2.58471	0.009746	0/+
PEAR1	THAP9	0.204745	2.69e-05	0.708772	0.000681	2.58061	0.009863	#ERROR!
CALM2P4	THAP9	0.162691	0.000892	0.686313	0.001175	2.57974	0.009887	#ERROR!
PI16	THAP9	-0.029	0.556256	0.570175	0.010805	2.5797	0.009889	0/+
SLC35E3	THAP9	0.447608	0	0.820535	1.68e-05	2.57953	0.009893	#ERROR!
NUDCD3	THAP9	0.370349	6.66e-15	0.787719	6.23e-05	2.57884	0.009913	#ERROR!
PEPD	THAP9	0.286295	2.99e-09	0.749123	0.000223	2.57831	0.009928	#ERROR!
RNU6ATAC27P	THAP9	0.267772	3.14e-08	-0.38161	0.106923	-2.57824	0.009931	#ERROR!
KDR	THAP9	0.294626	9.79e-10	0.752632	0.000201	2.57429	0.010045	#ERROR!
LTBP2	THAP9	-0.06063	0.218271	0.547368	0.015279	2.57411	0.01005	0/+
RPS15AP31	THAP9	0.112708	0.021811	0.657376	0.002224	2.57283	0.010087	#ERROR!
HTR7	THAP9	-0.08711	0.076652	0.52807	0.020124	2.5721	0.010108	0/+
RPS3P5	THAP9	0.097848	0.046627	0.648507	0.00267	2.57118	0.010135	#ERROR!
PTGDR	THAP9	-0.10541	0.032018	0.514261	0.024283	2.57022	0.010163	-/+
BSN	THAP9	0.412999	0	0.805092	3.21e-05	2.56791	0.010231	#ERROR!
MYCBPAP	THAP9	0.324517	1.31e-11	0.765584	0.000133	2.5648	0.010324	#ERROR!
ISLR2	THAP9	0.019555	0.691567	0.599386	0.006683	2.56384	0.010352	0/+
LOC101928009	THAP9	0.121401	0.013443	-0.50098	0.028893	-2.56378	0.010354	#ERROR!
CHD8	THAP9	0.551126	0	0.859649	2.4e-06	2.56144	0.010424	#ERROR!
PTPRJ	THAP9	0.046233	0.348063	0.615789	0.005001	2.56116	0.010432	0/+
LOC100506688	THAP9	0.11982	0.014712	0.65964	0.002121	2.56059	0.010449	#ERROR!
N4BP2L1	THAP9	0.343341	6.75e-13	0.773684	0.000102	2.55978	0.010474	#ERROR!
SCN2B	THAP9	-0.07629	0.121162	0.533333	0.018697	2.55852	0.010512	0/+
PNLDC1	THAP9	0.260831	7.26e-08	-0.38352	0.105039	-2.55829	0.010519	#ERROR!
NPM1P36	THAP9	0.254963	1.45e-07	-0.38869	0.100041	-2.55751	0.010542	#ERROR!
AEBP1	THAP9	-0.17856	0.000261	0.454386	0.050652	2.55652	0.010572	-/0
MBTPS1	THAP9	0.48846	0	0.835088	8.65e-06	2.55641	0.010576	#ERROR!
MIR5689HG	THAP9	0.042773	0.38536	-0.55651	0.013336	-2.55596	0.01059	0/-
SLC46A3	THAP9	0.105891	0.031232	0.650877	0.002544	2.55583	0.010593	#ERROR!
MXD4	THAP9	0.207653	2.05e-05	0.707018	0.000712	2.55563	0.010599	#ERROR!
ADA2	THAP9	0.007134	0.884936	0.589474	0.007905	2.55276	0.010687	0/+
GLT8D2	THAP9	-0.11937	0.015095	0.5	0.029258	2.55093	0.010744	-/+
RN7SL442P	THAP9	0.156879	0.001364	-0.47059	0.042008	-2.55004	0.010771	#ERROR!
MYMX	THAP9	0.12987	0.008152	0.663443	0.001956	2.54745	0.010851	#ERROR!
C1RL	THAP9	0.301238	3.93e-10	0.752632	0.000201	2.54663	0.010877	#ERROR!
EIF2AK4	THAP9	0.410286	0	0.801754	3.66e-05	2.54447	0.010944	#ERROR!
LINC02444	THAP9	0.27537	1.22e-08	-0.3668	0.122419	-2.54383	0.010964	#ERROR!
MTMR11	THAP9	0.3133	7.02e-11	0.757895	0.00017	2.54257	0.011004	#ERROR!
GGT2	THAP9	0.156093	0.001443	0.677279	0.001445	2.5412	0.011047	#ERROR!
MED20	THAP9	0.48767	0	0.833333	9.4e-06	2.53837	0.011137	#ERROR!
CCDC170	THAP9	0.04388	0.373167	0.610526	0.005497	2.538	0.011149	0/+
PTGFRN	THAP9	0.081539	0.097557	0.633333	0.003603	2.53568	0.011223	0/+
LRIG2-DT	THAP9	0.275337	1.23e-08	0.738789	0.000303	2.53543	0.011231	#ERROR!
FKBP4P2	THAP9	0.071279	0.147683	-0.53229	0.018973	-2.53375	0.011285	0/-
GPR27	THAP9	0.274306	1.4e-08	0.738043	0.000309	2.53343	0.011295	#ERROR!
ACOT13	THAP9	0.412698	0	0.801754	3.66e-05	2.53341	0.011296	#ERROR!
PIWIL4	THAP9	0.193661	7.31e-05	0.696491	0.000923	2.53214	0.011337	#ERROR!
FBXW8	THAP9	0.589458	0	0.87193	1.15e-06	2.53185	0.011346	#ERROR!
AQP4	THAP9	0.178717	0.000257	0.688323	0.001121	2.53134	0.011363	#ERROR!
CPNE2	THAP9	0.180953	0.000214	0.689474	0.001091	2.53088	0.011378	#ERROR!
CHRDL1	THAP9	-0.01093	0.824569	0.573684	0.010223	2.53065	0.011385	0/+
ACVR1	THAP9	0.146293	0.002848	0.670175	0.001691	2.52984	0.011411	#ERROR!
CYP3A7	THAP9	0.411893	0	0.801055	3.77e-05	2.52964	0.011418	#ERROR!
MAGED1	THAP9	0.238284	9.37e-07	0.719298	0.000518	2.52803	0.01147	#ERROR!
SLC25A40	THAP9	0.566713	0	0.863158	1.96e-06	2.52687	0.011508	#ERROR!
LINC02777	THAP9	-0.00971	0.843912	0.573684	0.010223	2.526	0.011537	0/+
RETREG2	THAP9	0.328785	6.83e-12	0.763158	0.000144	2.52434	0.011592	#ERROR!
RN7SL635P	THAP9	0.145438	0.003016	-0.47434	0.040178	-2.52383	0.011608	#ERROR!
NSD3	THAP9	0.549629	0	0.85614	2.92e-06	2.51897	0.01177	#ERROR!
RN7SL239P	THAP9	0.364896	1.73e-14	-0.27134	0.261142	-2.51887	0.011773	#ERROR!
FTH1P25	THAP9	0.190021	0.0001	-0.43686	0.061459	-2.51836	0.01179	#ERROR!
BGN	THAP9	-0.16618	0.000687	0.45614	0.049655	2.51631	0.011859	-/+
ANKRA2	THAP9	0.568727	0	0.863158	1.96e-06	2.51554	0.011885	#ERROR!
RN7SL42P	THAP9	0.090383	0.066178	0.635223	0.003474	2.51377	0.011945	0/+
RNU6-759P	THAP9	0.337513	1.73e-12	-0.29864	0.214251	-2.51307	0.011968	#ERROR!
MIR4514	THAP9	0.104937	0.032795	-0.5035	0.02797	-2.51304	0.01197	#ERROR!
HTR3D	THAP9	0.10423	0.033995	-0.5035	0.02797	-2.51032	0.012062	#ERROR!
SESN3	THAP9	0.270433	2.27e-08	0.733333	0.000353	2.51024	0.012065	#ERROR!
MTIF2P1	THAP9	0.260603	7.46e-08	0.728357	0.000406	2.50984	0.012079	#ERROR!
OR11G1P	THAP9	0.063834	0.194897	-0.53311	0.018755	-2.50962	0.012086	0/-
PCNX4	THAP9	0.498065	0	0.835088	8.65e-06	2.50802	0.012141	#ERROR!
LPCAT2	THAP9	0.068668	0.163136	0.621053	0.004541	2.50785	0.012147	0/+
LOC257396	THAP9	0.426432	0	0.805263	3.19e-05	2.50761	0.012155	#ERROR!
LINC02525	THAP9	0.244123	4.95e-07	-0.3873	0.101368	-2.5072	0.012169	#ERROR!
COX4I1P2	THAP9	0.310738	1.02e-10	-0.32426	0.175609	-2.50717	0.01217	#ERROR!
CASP12	THAP9	0.228289	2.69e-06	0.711463	0.000636	2.50714	0.012171	#ERROR!
IQCE	THAP9	0.302211	3.43e-10	0.748574	0.000227	2.50713	0.012172	#ERROR!
C3AR1	THAP9	-0.17237	0.000427	0.449123	0.053732	2.50695	0.012178	-/0
SCN10A	THAP9	0.079706	0.10535	-0.52102	0.022171	-2.5066	0.01219	0/-
CD33	THAP9	-0.14404	0.003311	0.47193	0.041347	2.50654	0.012192	-/+
PARP16	THAP9	0.516207	0	0.842105	6.13e-06	2.50507	0.012243	#ERROR!
CCDC122	THAP9	0.40294	0	0.794737	4.8e-05	2.50428	0.01227	#ERROR!
SFXN3	THAP9	0.052883	0.28304	0.610526	0.005497	2.5036	0.012294	0/+
IFRD1	THAP9	0.450219	0	-0.17018	0.4861	-2.50358	0.012294	#ERROR!
GRIN3A	THAP9	0.144409	0.003231	0.665203	0.001884	2.50298	0.012315	#ERROR!
ORAI3	THAP9	0.102718	0.036688	0.640351	0.003142	2.49925	0.012446	#ERROR!
LOC100652999	THAP9	0.238699	8.95e-07	0.715782	0.000569	2.49873	0.012464	#ERROR!
RNU6-216P	THAP9	0.297138	6.94e-10	0.745115	0.000252	2.49855	0.01247	#ERROR!
ATP6V1C1	THAP9	0.482926	0	0.82807	1.2e-05	2.49729	0.012515	#ERROR!
GASK1B	THAP9	0.091829	0.061937	0.633333	0.003603	2.49615	0.012555	0/+
GLI2	THAP9	-0.04915	0.318443	0.540351	0.016919	2.49222	0.012695	0/+
MYO1H	THAP9	0.337795	1.65e-12	-0.29329	0.22297	-2.49194	0.012705	#ERROR!
AKIP1	THAP9	0.107662	0.0285	0.642105	0.003035	2.49156	0.012718	#ERROR!
KAZALD1	THAP9	0.144548	0.003201	0.663158	0.001968	2.48849	0.012829	#ERROR!
DAB2IP	THAP9	0.241281	6.76e-07	0.715789	0.000568	2.48834	0.012834	#ERROR!
NPIPB6	THAP9	0.228645	2.59e-06	-0.39665	0.092687	-2.48685	0.012888	#ERROR!
LURAP1	THAP9	0.049173	0.318232	0.605263	0.006034	2.48596	0.01292	0/+
CCNHP1	THAP9	0.057022	0.247003	-0.53311	0.018755	-2.48356	0.013008	0/-
MIR6807	THAP9	0.057746	0.241042	-0.53229	0.018973	-2.48195	0.013067	0/-
LINC00515	THAP9	0.256526	1.21e-07	0.722716	0.000473	2.48109	0.013098	#ERROR!
LINC00909	THAP9	0.493615	0	0.831066	1.05e-05	2.48042	0.013123	#ERROR!
GPRC5B	THAP9	0.230199	2.21e-06	0.708772	0.000681	2.47877	0.013184	#ERROR!
ANKRD62	THAP9	0.244035	4.99e-07	-0.38094	0.107592	-2.47842	0.013197	#ERROR!
ORC5	THAP9	0.424625	0	0.801754	3.66e-05	2.47828	0.013202	#ERROR!
LIPI	THAP9	0.474373	0	-0.13357	0.58566	-2.47784	0.013218	#ERROR!
LINC00334	THAP9	0.218834	7e-06	0.702603	0.000795	2.47755	0.013229	#ERROR!
LOC100420048	THAP9	0.236748	1.1e-06	-0.3873	0.101368	-2.47736	0.013236	#ERROR!
S100PBP	THAP9	0.571017	0	0.861404	2.17e-06	2.47654	0.013266	#ERROR!
SHISA4	THAP9	0.088287	0.072741	0.62807	0.003983	2.47645	0.013269	0/+
LIPA	THAP9	0.178903	0.000254	0.680702	0.001337	2.47595	0.013288	#ERROR!
LINC00210	THAP9	0.055883	0.256582	-0.53229	0.018973	-2.47482	0.01333	0/-
IGFBP6	THAP9	-0.25851	9.55e-08	0.366667	0.122561	2.47408	0.013358	-/0
MIR4635	THAP9	0.419201	0	-0.19959	0.412654	-2.47388	0.013365	#ERROR!
EHMT2	THAP9	0.45005	0	0.812281	2.39e-05	2.47352	0.013379	#ERROR!
CT45A11P	THAP9	0.247557	3.37e-07	-0.37622	0.112384	-2.47172	0.013446	#ERROR!
RN7SKP35	THAP9	0.140465	0.004188	-0.4673	0.043665	-2.46998	0.013512	#ERROR!
NTN4	THAP9	0.290947	1.61e-09	0.738596	0.000304	2.46913	0.013544	#ERROR!
CXCL12	THAP9	-0.08877	0.071177	0.507018	0.026719	2.46886	0.013554	0/+
NDN	THAP9	-0.02044	0.678415	0.55614	0.013411	2.46869	0.013561	0/+
ANKRD30A	THAP9	0.289565	1.94e-09	-0.33593	0.159686	-2.46839	0.013572	#ERROR!
IPP	THAP9	0.569268	0	0.860026	2.35e-06	2.46617	0.013657	#ERROR!
ALX1	THAP9	0.139625	0.004423	0.656968	0.002243	2.46583	0.01367	#ERROR!
EEPD1	THAP9	0.129235	0.008472	0.650877	0.002544	2.4656	0.013678	#ERROR!
CLEC12B	THAP9	0.064364	0.191211	0.61131	0.005421	2.46445	0.013722	0/+
CTF1	THAP9	0.144709	0.003167	0.659649	0.002121	2.46408	0.013736	#ERROR!
MIR3189	THAP9	0.256662	1.19e-07	0.720562	0.000501	2.4634	0.013763	#ERROR!
SAMD9L	THAP9	0.044649	0.364839	0.598246	0.006815	2.46131	0.013843	0/+
CBLN3	THAP9	0.194564	6.75e-05	0.687144	0.001153	2.46022	0.013885	#ERROR!
APP	THAP9	0.311077	9.7e-11	0.747368	0.000235	2.45939	0.013917	#ERROR!
MIR4504	THAP9	0.090869	0.064727	-0.5035	0.02797	-2.4589	0.013936	0/-
MCF2	THAP9	0.212899	1.25e-05	0.69688	0.000915	2.45853	0.013951	#ERROR!
RTN1	THAP9	-0.02721	0.580861	0.549123	0.01489	2.45602	0.014049	0/+
MTRNR2L13	THAP9	0.049332	0.316668	0.600338	0.006574	2.45587	0.014054	0/+
P3H4	THAP9	0.029937	0.54357	0.587719	0.008139	2.45558	0.014066	0/+
PLD3	THAP9	0.165327	0.000733	0.670175	0.001691	2.45548	0.01407	#ERROR!
P2RX7	THAP9	0.051723	0.29375	0.601754	0.006415	2.45518	0.014081	0/+
FRYL	THAP9	0.612008	0	0.875439	9.19e-07	2.45385	0.014134	#ERROR!
LINC00622	THAP9	0.287192	2.65e-09	0.734715	0.00034	2.4524	0.014191	#ERROR!
EPHB2	THAP9	0.017521	0.72225	0.578947	0.009396	2.45225	0.014197	0/+
GCSAML	THAP9	-0.00655	0.894324	0.562527	0.012169	2.45117	0.014239	0/+
KRTAP5-11	THAP9	0.206031	2.39e-05	0.692061	0.001027	2.45043	0.014269	#ERROR!
SLC34A2	THAP9	0.1883	0.000116	0.682247	0.001291	2.44987	0.014291	#ERROR!
EIF3J-DT	THAP9	0.505418	0	0.833333	9.4e-06	2.44857	0.014342	#ERROR!
MSC-AS1	THAP9	-0.09962	0.042772	0.494737	0.031283	2.4481	0.014361	-/+
SLC38A6	THAP9	0.241247	6.79e-07	0.710526	0.000651	2.44765	0.014379	#ERROR!
SFMBT2	THAP9	0.056573	0.250753	0.603509	0.006222	2.44714	0.014399	0/+
MGC16275	THAP9	0.147581	0.00261	0.658762	0.00216	2.44692	0.014408	#ERROR!
SCD5	THAP9	0.113903	0.020443	0.638877	0.003235	2.44661	0.014421	#ERROR!
IMPACT	THAP9	0.442384	0	0.806494	3.03e-05	2.44604	0.014443	#ERROR!
MROH9	THAP9	0.063243	0.199069	-0.52149	0.022029	-2.44599	0.014446	0/-
PHKA1-AS1	THAP9	0.182246	0.000193	-0.42792	0.067596	-2.44575	0.014455	#ERROR!
CPZ	THAP9	0.054357	0.26982	0.601754	0.006415	2.44511	0.014481	0/+
NUMA1	THAP9	0.549648	0	0.850877	3.89e-06	2.44497	0.014486	#ERROR!
NKILA	THAP9	-0.11473	0.019535	0.482456	0.036432	2.44489	0.01449	-/+
MAP2K5	THAP9	0.377358	1.78e-15	0.777193	9.04e-05	2.44429	0.014514	#ERROR!
DUBR	THAP9	0.225569	3.56e-06	0.701754	0.000812	2.44416	0.014519	#ERROR!
IGF2R	THAP9	0.336636	1.99e-12	0.757895	0.00017	2.44311	0.014561	#ERROR!
AMBRA1	THAP9	0.460625	0	0.814035	2.23e-05	2.4424	0.01459	#ERROR!
OR2W2P	THAP9	0.227839	2.82e-06	-0.3873	0.101368	-2.44147	0.014628	#ERROR!
SLC39A10	THAP9	0.455566	0	0.81176	2.45e-05	2.44123	0.014637	#ERROR!
LOC105375971	THAP9	0.086156	0.07995	-0.5035	0.02797	-2.44079	0.014655	0/-
POLR2M	THAP9	0.445001	0	0.807018	2.97e-05	2.43934	0.014714	#ERROR!
IGSF6	THAP9	-0.05936	0.228086	0.522807	0.021637	2.43805	0.014767	0/+
RPS12P31	THAP9	0.302048	3.51e-10	-0.31636	0.186988	-2.43704	0.014808	#ERROR!
BTNL2	THAP9	0.266458	3.69e-08	0.722256	0.000479	2.43678	0.014819	#ERROR!
PLXDC2	THAP9	-0.03438	0.485451	0.540351	0.016919	2.43581	0.014859	0/+
RBMXL2	THAP9	0.097354	0.047752	0.626916	0.004071	2.43434	0.014919	#ERROR!
RBM24	THAP9	0.022282	0.651231	0.578947	0.009396	2.4341	0.014929	0/+
RBM22P4	THAP9	0.225641	3.53e-06	-0.3873	0.101368	-2.43264	0.014989	#ERROR!
RTN3	THAP9	0.40734	0	0.789474	5.84e-05	2.43037	0.015083	#ERROR!
PGBP	THAP9	0.19394	7.13e-05	-0.41461	0.077562	-2.4303	0.015086	#ERROR!
GPX5	THAP9	0.225025	3.76e-06	-0.3873	0.101368	-2.43016	0.015092	#ERROR!
DPP8	THAP9	0.55679	0	0.852632	3.54e-06	2.4301	0.015095	#ERROR!
COA5	THAP9	0.500561	0	0.829825	1.11e-05	2.43	0.015099	#ERROR!
POLDIP3	THAP9	0.411384	0	0.791228	5.47e-05	2.42967	0.015113	#ERROR!
NHLRC4	THAP9	0.017029	0.729748	0.574441	0.0101	2.42839	0.015166	0/+
GPR20	THAP9	0.215754	9.47e-06	0.694201	0.000975	2.42735	0.01521	#ERROR!
FMR1	THAP9	0.553097	0	0.850877	3.89e-06	2.42608	0.015263	#ERROR!
CDC23	THAP9	0.579961	0	0.861404	2.17e-06	2.42557	0.015284	#ERROR!
C1QTNF2	THAP9	0.004406	0.928789	0.56516	0.011685	2.42413	0.015345	0/+
KLF13	THAP9	0.134731	0.00604	0.647368	0.002732	2.42117	0.015471	#ERROR!
OR7E99P	THAP9	0.045001	0.361067	-0.5297	0.019673	-2.41949	0.015542	0/-
OR4N2	THAP9	0.040041	0.416466	-0.53311	0.018755	-2.41868	0.015577	0/-
MOGAT3	THAP9	-0.04224	0.391368	-0.58926	0.007934	-2.4176	0.015623	0/-
LOC100130602	THAP9	0.117963	0.016336	-0.47388	0.0404	-2.41498	0.015736	#ERROR!
KIF1A	THAP9	0.181082	0.000212	0.673102	0.001586	2.4139	0.015783	#ERROR!
HTRA1	THAP9	-0.14209	0.003766	0.454386	0.050652	2.41382	0.015786	-/0
MKRN1	THAP9	0.591372	0	0.864912	1.77e-06	2.41182	0.015873	#ERROR!
KANSL1	THAP9	0.671053	0	0.894737	2.35e-07	2.41099	0.015909	#ERROR!
LUM	THAP9	-0.0807	0.101073	0.501754	0.028606	2.41096	0.015911	0/+
SCAI	THAP9	0.710373	0	0.908772	7.32e-08	2.41084	0.015916	#ERROR!
KDM4D	THAP9	0.407292	0	0.787347	6.31e-05	2.40917	0.015989	#ERROR!
MFAP2	THAP9	0.028853	0.55826	0.578947	0.009396	2.40903	0.015995	0/+
LRRC15	THAP9	-0.15223	0.001896	0.444932	0.056284	2.40813	0.016034	-/0
PHBP5	THAP9	0.257689	1.05e-07	-0.35212	0.139278	-2.40703	0.016083	#ERROR!
RFTN2	THAP9	0.278658	8.05e-09	0.724561	0.00045	2.40498	0.016173	#ERROR!
OPCML	THAP9	-0.03269	0.50708	0.535622	0.018102	2.40402	0.016216	0/+
LOC105369980	THAP9	0.265192	4.3e-08	-0.34427	0.148936	-2.40366	0.016232	#ERROR!
BTD	THAP9	0.378957	1.33e-15	0.773684	0.000102	2.40363	0.016233	#ERROR!
P2RY13	THAP9	-0.09947	0.043092	0.485965	0.034898	2.40349	0.016239	-/+
HOXD13	THAP9	0.004392	0.929	0.561404	0.01238	2.4032	0.016252	0/+
HSPB9	THAP9	0.299178	5.24e-10	0.734743	0.00034	2.40264	0.016277	#ERROR!
RPS17P3	THAP9	0.224008	4.17e-06	0.695333	0.000949	2.40263	0.016278	#ERROR!
ADAR	THAP9	0.445198	0	0.803509	3.42e-05	2.40036	0.016379	#ERROR!
NMNAT1	THAP9	0.465356	0	0.812281	2.39e-05	2.39971	0.016408	#ERROR!
LOC100420742	THAP9	0.217336	8.11e-06	-0.3873	0.101368	-2.39935	0.016424	#ERROR!
FGD5	THAP9	0.086069	0.080257	0.614035	0.005162	2.39788	0.01649	0/+
GZMAP1	THAP9	-0.00359	0.941869	-0.55988	0.012672	-2.39779	0.016495	0/-
MIR4778	THAP9	0.263434	5.32e-08	-0.34427	0.148936	-2.39646	0.016554	#ERROR!
INPP5B	THAP9	0.438298	0	0.8	3.92e-05	2.39559	0.016594	#ERROR!
RYR3-DT	THAP9	-0.05229	0.288504	0.519829	0.022532	2.3954	0.016602	0/+
LOC100507516	THAP9	0.150317	0.002164	0.652632	0.002454	2.39527	0.016608	#ERROR!
FICD	THAP9	0.47057	0	0.814035	2.23e-05	2.394	0.016666	#ERROR!
F10	THAP9	0.070658	0.151251	0.603509	0.006222	2.39323	0.016701	0/+
MICU1	THAP9	0.381602	8.88e-16	0.773684	0.000102	2.39185	0.016764	#ERROR!
LPAR4	THAP9	0.048004	0.32989	0.588354	0.008054	2.39031	0.016834	0/+
LINC02126	THAP9	-0.10096	0.040055	0.482145	0.03657	2.3902	0.016839	-/+
CCPG1	THAP9	0.19775	5.09e-05	0.678947	0.001391	2.38903	0.016893	#ERROR!
FOXD3	THAP9	-0.02256	0.647126	0.539948	0.017018	2.38857	0.016914	0/+
FAM171A1	THAP9	0.105541	0.031797	0.624561	0.004255	2.38806	0.016938	#ERROR!
CLIP2	THAP9	0.117026	0.017213	0.631579	0.003726	2.3879	0.016945	#ERROR!
LOC391711	THAP9	0.010294	0.834585	-0.54792	0.015156	-2.38496	0.017081	0/-
IGHVII-78-1	THAP9	0.284517	3.77e-09	0.725043	0.000444	2.3846	0.017098	#ERROR!
SLC35B2	THAP9	0.277093	9.83e-09	0.721053	0.000495	2.38344	0.017152	#ERROR!
FAM198B-AS1	THAP9	0.183724	0.000171	0.670175	0.001691	2.38315	0.017165	#ERROR!
HLA-V	THAP9	0.01491	0.76229	0.564779	0.011754	2.38195	0.017221	0/+
SFPQ	THAP9	0.648842	0	0.147368	0.547136	-2.38171	0.017233	#ERROR!
AGXT2	THAP9	0.191081	9.14e-05	-0.40643	0.084207	-2.38149	0.017243	#ERROR!
CCR5	THAP9	-0.10943	0.025986	0.473684	0.040494	2.38105	0.017264	-/+
CERCAM	THAP9	-0.05862	0.234024	0.512281	0.024931	2.38038	0.017295	0/+
KIAA1143	THAP9	0.579003	0	0.857895	2.65e-06	2.37983	0.017321	#ERROR!
PODXL	THAP9	0.212836	1.26e-05	0.685965	0.001185	2.37906	0.017357	#ERROR!
P2RY12	THAP9	0.005441	0.912107	0.557752	0.013088	2.37894	0.017362	0/+
MIR558	THAP9	0.165025	0.00075	0.658751	0.002161	2.37869	0.017374	#ERROR!
LRTOMT	THAP9	0.511535	0	0.830189	1.09e-05	2.37824	0.017396	#ERROR!
PDP1	THAP9	0.392288	0	0.777193	9.04e-05	2.37749	0.017431	#ERROR!
GPX7	THAP9	0.173011	0.000406	0.663158	0.001968	2.37718	0.017446	#ERROR!
FGF14-AS1	THAP9	0.211332	1.45e-05	-0.3873	0.101368	-2.37536	0.017532	#ERROR!
RNU6-577P	THAP9	0.302391	3.35e-10	-0.30123	0.210111	-2.37475	0.017561	#ERROR!
MMRN2	THAP9	0.17071	0.000486	0.661404	0.002043	2.37431	0.017582	#ERROR!
REM1	THAP9	-0.04721	0.338005	0.519298	0.022694	2.37321	0.017634	0/+
ABHD1	THAP9	0.34218	8.16e-13	0.752646	0.000201	2.37264	0.017661	#ERROR!
GIMAP1	THAP9	-0.105	0.032689	0.475439	0.039655	2.37262	0.017663	-/+
LOC375196	THAP9	0.070465	0.152374	0.599913	0.006622	2.37249	0.017669	0/+
FFAR4	THAP9	0.111235	0.023606	0.625557	0.004176	2.37232	0.017677	#ERROR!
RN7SL330P	THAP9	0.210551	1.56e-05	-0.3873	0.101368	-2.37224	0.01768	#ERROR!
RGL1	THAP9	0.174532	0.00036	0.663158	0.001968	2.3712	0.01773	#ERROR!
H2AC21	THAP9	0.26388	5.04e-08	-0.33786	0.157151	-2.37065	0.017757	#ERROR!
RNF182	THAP9	0.317728	3.65e-11	0.739995	0.000292	2.36837	0.017867	#ERROR!
PEX12	THAP9	0.546308	0	0.84386	5.61e-06	2.36829	0.017871	#ERROR!
H3Y1	THAP9	0.118327	0.016006	-0.46401	0.045371	-2.36814	0.017878	#ERROR!
BTF3P6	THAP9	0.243469	5.32e-07	-0.35642	0.134181	-2.36793	0.017888	#ERROR!
RWDD2B	THAP9	0.346923	3.75e-13	0.754386	0.00019	2.36748	0.01791	#ERROR!
P4HA2	THAP9	0.108081	0.027883	0.622807	0.004396	2.36732	0.017918	#ERROR!
RNU6-242P	THAP9	0.127521	0.009392	0.634533	0.00352	2.36608	0.017978	#ERROR!
BMP10	THAP9	-0.00856	0.862086	0.545271	0.015756	2.36395	0.018081	0/+
MXRA8	THAP9	-0.10718	0.029225	0.47193	0.041347	2.36377	0.01809	-/+
SMAD6	THAP9	0.271914	1.89e-08	0.715789	0.000568	2.36333	0.018111	#ERROR!
KLHL26	THAP9	0.457052	0	0.805263	3.19e-05	2.36257	0.018149	#ERROR!
PTPN9	THAP9	0.449266	0	0.801754	3.66e-05	2.36218	0.018168	#ERROR!
LHFPL3	THAP9	0.227393	2.95e-06	0.691557	0.001039	2.3613	0.018211	#ERROR!
SLC2A10	THAP9	0.385284	4.44e-16	0.77193	0.000108	2.35879	0.018335	#ERROR!
ADCY1	THAP9	0.29419	1.04e-09	0.726635	0.000426	2.35718	0.018414	#ERROR!
MOB3B	THAP9	0.116917	0.017318	0.626591	0.004096	2.35686	0.01843	#ERROR!
DIRAS3	THAP9	0.085671	0.081671	0.607018	0.00585	2.35676	0.018435	0/+
C11orf58	THAP9	0.40457	0	0.780702	8e-05	2.35585	0.01848	#ERROR!
PTEN	THAP9	0.335548	2.37e-12	0.747368	0.000235	2.35522	0.018511	#ERROR!
FAM120C	THAP9	0.42262	0	0.788943	5.95e-05	2.35464	0.01854	#ERROR!
PJVK	THAP9	0.350628	2.03e-13	0.754717	0.000188	2.35433	0.018556	#ERROR!
GTF3C6P3	THAP9	0.220524	5.92e-06	0.68664	0.001166	2.35318	0.018613	#ERROR!
COPS7B	THAP9	0.350378	2.11e-13	0.754386	0.00019	2.35249	0.018648	#ERROR!
LY6E	THAP9	-0.0831	0.091297	0.487719	0.034151	2.34933	0.018807	0/+
RN7SL551P	THAP9	0.204762	2.69e-05	-0.3873	0.101368	-2.34918	0.018815	#ERROR!
GCNT1	THAP9	-0.02122	0.66682	0.533333	0.018697	2.34804	0.018872	0/+
RNU2-18P	THAP9	0.181692	0.000202	-0.40705	0.083695	-2.34721	0.018915	#ERROR!
C1QTNF8	THAP9	0.085605	0.081905	0.605369	0.006023	2.34708	0.018921	0/+
RPL9P15	THAP9	0.199194	4.47e-05	0.673684	0.001565	2.34632	0.01896	#ERROR!
PCDHAC2	THAP9	0.217901	7.67e-06	0.683934	0.001242	2.34423	0.019066	#ERROR!
CYP2C19	THAP9	0.220598	5.87e-06	-0.37186	0.11695	-2.34367	0.019095	#ERROR!
SLC4A2	THAP9	0.366962	1.2e-14	0.761404	0.000153	2.34279	0.01914	#ERROR!
ISLR	THAP9	-0.18658	0.000134	0.401754	0.08819	2.34239	0.019161	-/0
C20orf96	THAP9	0.448339	0	0.799474	4e-05	2.34239	0.019161	#ERROR!
C11orf42	THAP9	0.45515	0	-0.12262	0.617007	-2.34195	0.019184	#ERROR!
MAB21L1	THAP9	0.243565	5.26e-07	0.697674	0.000897	2.3411	0.019227	#ERROR!
NBL1	THAP9	-0.1861	0.00014	0.401754	0.08819	2.34047	0.019259	-/0
LOC100996696	THAP9	0.136991	0.005237	0.636268	0.003404	2.34044	0.019261	#ERROR!
LINC00939	THAP9	0.068677	0.163077	0.593335	0.007409	2.3404	0.019263	0/+
POLI	THAP9	0.608864	0	0.867047	1.55e-06	2.34015	0.019276	#ERROR!
CIR1	THAP9	0.469602	0	0.808772	2.77e-05	2.34001	0.019283	#ERROR!
ANAPC1	THAP9	0.501695	0	0.822807	1.52e-05	2.33989	0.019289	#ERROR!
B3GNT9	THAP9	0.24814	3.16e-07	0.7	0.000848	2.33987	0.019291	#ERROR!
ACVR2A	THAP9	0.510086	0	0.826316	1.3e-05	2.33869	0.019351	#ERROR!
ATF4	THAP9	0.282524	4.89e-09	-0.31228	0.193042	-2.33843	0.019365	#ERROR!
MBOAT1	THAP9	0.450499	0	0.8	3.92e-05	2.33764	0.019406	#ERROR!
OTOP1	THAP9	0.156785	0.001373	-0.42588	0.069059	-2.33631	0.019475	#ERROR!
MIR6832	THAP9	0.266119	3.85e-08	-0.32763	0.170899	-2.336	0.019491	#ERROR!
GRIP2	THAP9	0.072076	0.143192	0.594737	0.007235	2.33564	0.01951	0/+
HPGDS	THAP9	-0.08402	0.087739	0.484211	0.035659	2.33537	0.019524	0/+
CSP2	THAP9	0.158753	0.001191	0.648507	0.00267	2.33506	0.01954	#ERROR!
CCDC105	THAP9	0.06715	0.172656	-0.49691	0.030432	-2.33446	0.019572	0/-
MRPS14	THAP9	0.438445	0	0.794208	4.9e-05	2.33435	0.019578	#ERROR!
CDC42EP5	THAP9	-0.0536	0.276568	0.507018	0.026719	2.3341	0.019591	0/+
CA11	THAP9	0.125225	0.010763	0.62807	0.003983	2.33402	0.019595	#ERROR!
BEAN1	THAP9	0.104754	0.033101	0.614507	0.005118	2.32889	0.019865	#ERROR!
CYP4F30P	THAP9	0.199643	4.29e-05	-0.3873	0.101368	-2.32884	0.019867	#ERROR!
IFT46	THAP9	0.381025	8.88e-16	0.766667	0.000129	2.32867	0.019877	#ERROR!
RAB3A	THAP9	0.317852	3.59e-11	0.735088	0.000336	2.32683	0.019974	#ERROR!
RPL9P8	THAP9	0.116025	0.018196	0.621053	0.004541	2.32575	0.020032	#ERROR!
AIRN	THAP9	0.222524	4.84e-06	-0.36548	0.123863	-2.32325	0.020166	#ERROR!
RPL35AP29	THAP9	0.245367	4.31e-07	-0.34427	0.148936	-2.32283	0.020188	#ERROR!
MEOX2	THAP9	-0.07828	0.111733	0.485965	0.034898	2.32209	0.020228	0/+
AP2A1	THAP9	0.329528	6.08e-12	0.740351	0.000289	2.32113	0.02028	#ERROR!
C2orf88	THAP9	0.16336	0.000849	0.649123	0.002637	2.32109	0.020282	#ERROR!
GCSIR	THAP9	0.054153	0.271627	0.580439	0.009172	2.32099	0.020288	0/+
PCGF2	THAP9	0.393732	0	0.77193	0.000108	2.32083	0.020296	#ERROR!
CHRFAM7A	THAP9	0.138111	0.004876	0.633527	0.003589	2.31858	0.020418	#ERROR!
HDAC11	THAP9	0.250728	2.35e-07	0.698246	0.000885	2.31627	0.020544	#ERROR!
MIR3944	THAP9	0.243688	5.19e-07	-0.34427	0.148936	-2.31602	0.020557	#ERROR!
LOC644746	THAP9	0.196304	5.79e-05	-0.3873	0.101368	-2.31559	0.02058	#ERROR!
MRPL10	THAP9	0.455256	0	0.8	3.92e-05	2.31482	0.020623	#ERROR!
RNA5SP33	THAP9	0.195951	5.97e-05	-0.3873	0.101368	-2.31419	0.020657	#ERROR!
GPR12	THAP9	0.139418	0.004482	0.633166	0.003614	2.3112	0.020822	#ERROR!
IL1F10	THAP9	0.027196	0.58109	-0.52199	0.02188	-2.3109	0.020838	0/-
LEFTY2	THAP9	-0.09981	0.042384	0.466871	0.043883	2.31064	0.020853	-/+
LOC112268410	THAP9	0.143576	0.003415	-0.43132	0.065212	-2.3102	0.020877	#ERROR!
DLL4	THAP9	0.199314	4.42e-05	0.668421	0.001757	2.30935	0.020924	#ERROR!
LINC02828	THAP9	-0.12825	0.008988	0.443734	0.05703	2.30924	0.02093	-/0
LRIG2	THAP9	0.666949	0	0.887719	3.97e-07	2.30923	0.020931	#ERROR!
MIR6768	THAP9	0.194696	6.67e-05	-0.3873	0.101368	-2.30922	0.020931	#ERROR!
ACSM2B	THAP9	0.00906	0.854173	0.547513	0.015247	2.30896	0.020946	0/+
ACMSD	THAP9	0.466175	0	-0.10006	0.683587	-2.30822	0.020987	#ERROR!
GJA9	THAP9	0.307203	1.69e-10	0.727049	0.000421	2.30599	0.021111	#ERROR!
FAM167A-AS1	THAP9	0.208602	1.88e-05	0.673192	0.001583	2.30548	0.02114	#ERROR!
RN7SL274P	THAP9	0.193572	7.36e-05	-0.3873	0.101368	-2.30477	0.021179	#ERROR!
RN7SL594P	THAP9	0.192913	7.8e-05	-0.3873	0.101368	-2.30216	0.021326	#ERROR!
AGGF1	THAP9	0.583946	0	0.854386	3.22e-06	2.30127	0.021376	#ERROR!
C22orf42	THAP9	0.192575	8.03e-05	-0.3873	0.101368	-2.30082	0.021402	#ERROR!
DHRS12	THAP9	0.183405	0.000175	0.657895	0.0022	2.30067	0.02141	#ERROR!
GCG	THAP9	0.192457	8.11e-05	-0.3873	0.101368	-2.30036	0.021428	#ERROR!
BCOR	THAP9	0.550348	0	0.840351	6.69e-06	2.30028	0.021432	#ERROR!
CTDSPL2	THAP9	0.592864	0	0.857895	2.65e-06	2.29936	0.021484	#ERROR!
RPL13AP19	THAP9	0.083049	0.091487	0.59565	0.007124	2.29895	0.021508	0/+
CCDC68	THAP9	0.109286	0.026177	0.612281	0.005327	2.29781	0.021572	#ERROR!
RPS15AP17	THAP9	0.10049	0.040986	0.606688	0.005884	2.29779	0.021573	#ERROR!
SLITRK5	THAP9	0.173667	0.000385	0.6517	0.002502	2.29768	0.02158	#ERROR!
AP1B1P1	THAP9	0.191561	8.77e-05	-0.3873	0.101368	-2.29681	0.02163	#ERROR!
NWD1	THAP9	0.155222	0.001535	0.640035	0.003162	2.29366	0.02181	#ERROR!
CLEC9A	THAP9	-0.03855	0.434074	0.510321	0.025585	2.29359	0.021814	0/+
PSG5	THAP9	0.063446	0.197633	0.581675	0.00899	2.29256	0.021873	0/+
LINC01963	THAP9	0.207297	2.12e-05	0.67047	0.00168	2.29176	0.02192	#ERROR!
KCNJ12	THAP9	-0.1127	0.021822	0.452632	0.051663	2.29151	0.021934	-/0
C1orf127	THAP9	0.029684	0.546983	0.558318	0.012976	2.28964	0.022042	0/+
EXT2	THAP9	0.257537	1.07e-07	0.698246	0.000885	2.28852	0.022107	#ERROR!
LINC02290	THAP9	0.251146	2.24e-07	0.694639	0.000965	2.28787	0.022145	#ERROR!
MAPK12	THAP9	-0.07583	0.123448	0.480702	0.037218	2.28651	0.022225	0/+
FAIM2	THAP9	-0.11358	0.020809	0.450877	0.05269	2.2865	0.022225	-/0
LOC100422022	THAP9	0.208277	1.94e-05	0.670192	0.001691	2.28593	0.022258	#ERROR!
KIF3B	THAP9	0.484578	0	0.810526	2.58e-05	2.28552	0.022283	#ERROR!
LINC02104	THAP9	-0.07223	0.142346	0.483038	0.036174	2.2843	0.022354	0/+
GTDC1	THAP9	0.473172	0	0.805263	3.19e-05	2.28416	0.022362	#ERROR!
PCDHB2	THAP9	0.148649	0.002427	0.634489	0.003523	2.2837	0.022389	#ERROR!
GEN1	THAP9	0.608398	0	0.107018	0.662789	-2.28297	0.022432	#ERROR!
LOC100996385	THAP9	0.01568	0.750413	0.547189	0.01532	2.28196	0.022492	0/+
GPAT2P1	THAP9	0.144818	0.003144	0.631547	0.003728	2.27991	0.022613	#ERROR!
ANKRD65	THAP9	0.117133	0.017111	0.614035	0.005162	2.27823	0.022713	#ERROR!
NT5E	THAP9	-0.05295	0.282406	0.496491	0.030596	2.278	0.022726	0/+
FKBP15	THAP9	0.378025	1.78e-15	0.759649	0.000161	2.27797	0.022729	#ERROR!
RNU6-1143P	THAP9	0.08554	0.082139	-0.47135	0.041633	-2.27766	0.022747	0/-
CCNG1	THAP9	0.502036	0	0.817544	1.92e-05	2.27686	0.022795	#ERROR!
RN7SL164P	THAP9	0.186419	0.000136	-0.3873	0.101368	-2.27649	0.022817	#ERROR!
LOC100132857	THAP9	0.172015	0.000439	0.64749	0.002725	2.27641	0.022822	#ERROR!
NUCB1-AS1	THAP9	0.359941	4.13e-14	-0.21685	0.372537	-2.27619	0.022835	#ERROR!
RNU6-564P	THAP9	0.158568	0.001207	-0.41135	0.080163	-2.27616	0.022837	#ERROR!
BRDT	THAP9	0.24601	4.01e-07	-0.33273	0.163945	-2.27578	0.022859	#ERROR!
CCDC175	THAP9	0.137851	0.004957	0.626238	0.004123	2.27353	0.022994	#ERROR!
NHLRC1	THAP9	0.283851	4.12e-09	0.710526	0.000651	2.2732	0.023014	#ERROR!
RNU6ATAC17P	THAP9	0.198556	4.73e-05	-0.37573	0.112891	-2.27294	0.02303	#ERROR!
FXR1	THAP9	0.51918	0	0.824561	1.41e-05	2.27055	0.023174	#ERROR!
CARF	THAP9	0.560165	0	0.842105	6.13e-06	2.26906	0.023265	#ERROR!
LINC01836	THAP9	-0.0285	0.563068	0.512934	0.024715	2.26875	0.023283	0/+
NLRP2	THAP9	0.000454	0.992653	0.533802	0.018574	2.26791	0.023335	0/+
NEFL	THAP9	-0.01744	0.723494	0.520861	0.022218	2.26779	0.023342	0/+
ACTA2-AS1	THAP9	0.009778	0.842763	0.540351	0.016919	2.26745	0.023363	0/+
GATA2	THAP9	0.259625	8.38e-08	0.696491	0.000923	2.26697	0.023392	#ERROR!
ARAP1	THAP9	0.275796	1.16e-08	0.705263	0.000744	2.2663	0.023433	#ERROR!
LEFTY1	THAP9	0.110915	0.024013	0.60806	0.005744	2.26589	0.023458	#ERROR!
DNASE2	THAP9	0.315527	5.06e-11	0.726316	0.000429	2.26494	0.023516	#ERROR!
RMND1	THAP9	0.5006	0	0.815789	2.07e-05	2.26409	0.023568	#ERROR!
GALK2	THAP9	0.435743	0	0.785965	6.63e-05	2.26345	0.023608	#ERROR!
RNU6-1279P	THAP9	0.182751	0.000185	-0.3873	0.101368	-2.26201	0.023697	#ERROR!
IFI44	THAP9	0.051721	0.293771	0.568421	0.011107	2.26192	0.023703	0/+
COG8	THAP9	0.497136	0	0.814035	2.23e-05	2.26176	0.023712	#ERROR!
DNAJB8	THAP9	0.182631	0.000187	-0.3873	0.101368	-2.26153	0.023726	#ERROR!
HOXA2	THAP9	0.283117	4.53e-09	0.708573	0.000684	2.26125	0.023744	#ERROR!
RTL8A	THAP9	0.402155	0	0.769636	0.000117	2.26114	0.023751	#ERROR!
RNF125	THAP9	0.273973	1.46e-08	0.703509	0.000777	2.26054	0.023788	#ERROR!
GPR141	THAP9	-0.09692	0.048748	0.458764	0.048194	2.26021	0.023808	-/+
CRHBP	THAP9	0.01127	0.819153	0.539948	0.017018	2.25959	0.023847	0/+
LINC01490	THAP9	0.077359	0.116039	-0.47388	0.0404	-2.25869	0.023902	0/-
LOC101927690	THAP9	-0.03348	0.49695	-0.55533	0.013576	-2.25864	0.023906	0/-
SIRT5	THAP9	0.525457	0	0.826316	1.3e-05	2.25864	0.023906	#ERROR!
SLC25A21-AS1	THAP9	0.307698	1.58e-10	0.721369	0.000491	2.25838	0.023922	#ERROR!
B3GALT2	THAP9	0.195209	6.38e-05	0.658473	0.002174	2.25789	0.023952	#ERROR!
NAALADL1	THAP9	-0.0704	0.152727	0.478947	0.038017	2.25703	0.024006	0/+
SEPSECS	THAP9	0.692666	0	0.894737	2.35e-07	2.25698	0.02401	#ERROR!
ARHGAP18	THAP9	0.258947	9.08e-08	0.694737	0.000963	2.25679	0.024021	#ERROR!
GNAI1	THAP9	0.203509	3.02e-05	0.663158	0.001968	2.25665	0.02403	#ERROR!
NME8	THAP9	-0.14576	0.002951	0.417952	0.074966	2.25657	0.024035	-/0
NUP133	THAP9	0.502218	0	0.815789	2.07e-05	2.25585	0.02408	#ERROR!
LBX2-AS1	THAP9	0.165671	0.000714	0.640351	0.003142	2.25481	0.024145	#ERROR!
GIGYF2	THAP9	0.452549	0	0.792982	5.13e-05	2.25465	0.024155	#ERROR!
RAD17	THAP9	0.583542	0	0.850877	3.89e-06	2.25461	0.024158	#ERROR!
FAM131B	THAP9	0.037371	0.448244	0.557262	0.013186	2.25446	0.024167	0/+
RPL17P6	THAP9	0.140079	0.004295	0.624561	0.004255	2.25438	0.024172	#ERROR!
MAGEE1	THAP9	0.18232	0.000192	0.650285	0.002575	2.25426	0.02418	#ERROR!
CYS1	THAP9	-0.09643	0.049904	0.457895	0.048674	2.25414	0.024188	-/+
MBIP	THAP9	0.379901	1.11e-15	0.757895	0.00017	2.25386	0.024205	#ERROR!
LOC100996419	THAP9	0.466888	0	0.799474	4e-05	2.25295	0.024262	#ERROR!
SDCCAG8	THAP9	0.404193	0	0.769636	0.000117	2.25186	0.024331	#ERROR!
NLRP8	THAP9	0.092569	0.059856	-0.46035	0.047327	-2.25112	0.024378	0/-
LOC651644	THAP9	0.257005	1.14e-07	-0.31623	0.187176	-2.25021	0.024436	#ERROR!
MEGF10	THAP9	0.225389	3.62e-06	0.674857	0.001525	2.24996	0.024452	#ERROR!
PEX2	THAP9	0.559539	0	0.840351	6.69e-06	2.24966	0.024471	#ERROR!
LOC100129697	THAP9	-0.00959	0.845806	0.523029	0.021571	2.24921	0.024499	0/+
DSEL	THAP9	0.141532	0.003907	0.624561	0.004255	2.24873	0.02453	#ERROR!
ARHGAP22	THAP9	-0.10596	0.031128	0.449123	0.053732	2.24871	0.024531	-/0
RN7SL531P	THAP9	0.226367	3.28e-06	-0.34442	0.148737	-2.24682	0.024652	#ERROR!
LOC100533628	THAP9	0.178862	0.000254	-0.3873	0.101368	-2.24669	0.02466	#ERROR!
LOC100422225	THAP9	0.17886	0.000254	-0.3873	0.101368	-2.24668	0.024661	#ERROR!
LOC105378083	THAP9	0.3369	1.91e-12	0.735179	0.000335	2.24626	0.024687	#ERROR!
CTCFL	THAP9	0.209543	1.72e-05	-0.35963	0.130464	-2.24564	0.024727	#ERROR!
MTND5P31	THAP9	0.178285	0.000267	-0.3873	0.101368	-2.24441	0.024806	#ERROR!
MIR1296	THAP9	0.21059	1.56e-05	-0.35818	0.13213	-2.24349	0.024866	#ERROR!
ACADL	THAP9	0.259684	8.32e-08	0.693287	0.000997	2.24311	0.02489	#ERROR!
PRDM14	THAP9	0.225271	3.67e-06	-0.34427	0.148936	-2.24173	0.024979	#ERROR!
IGF2-AS	THAP9	0.004102	0.933684	0.531459	0.019196	2.24154	0.024991	0/+
ANAPC16	THAP9	0.36194	2.93e-14	0.747368	0.000235	2.24069	0.025046	#ERROR!
LSP1P5	THAP9	0.120667	0.014019	0.609917	0.005557	2.23947	0.025125	#ERROR!
LINC00484	THAP9	0.05872	0.233182	0.569172	0.010977	2.23938	0.025131	0/+
MGAT3	THAP9	0.175531	0.000332	0.64386	0.002931	2.23886	0.025165	#ERROR!
KDM3A	THAP9	0.582169	0	0.849123	4.27e-06	2.23844	0.025192	#ERROR!
DLG4	THAP9	0.187532	0.000124	0.650877	0.002544	2.2376	0.025247	#ERROR!
RHOXF1	THAP9	0.217497	7.98e-06	0.668447	0.001756	2.23708	0.025281	#ERROR!
RNU1-77P	THAP9	0.119381	0.015082	-0.43546	0.062387	-2.23581	0.025364	#ERROR!
RPL7P27	THAP9	0.087494	0.075361	0.587742	0.008136	2.23551	0.025384	0/+
AP4M1	THAP9	0.416203	0	0.773684	0.000102	2.23497	0.025419	#ERROR!
LINC02043	THAP9	0.183223	0.000178	-0.3805	0.108034	-2.23348	0.025517	#ERROR!
PDGFRB	THAP9	-0.03188	0.517754	0.503509	0.027966	2.23319	0.025536	0/+
RNF212	THAP9	-0.06236	0.205416	0.480035	0.03752	2.23162	0.02564	0/+
AAR2	THAP9	0.46109	0	0.794737	4.8e-05	2.23159	0.025642	#ERROR!
LINC01613	THAP9	0.107268	0.029088	-0.44426	0.056701	-2.23062	0.025706	#ERROR!
CFI	THAP9	-0.05891	0.231704	0.482456	0.036432	2.23041	0.02572	0/+
SESN1	THAP9	0.385225	4.44e-16	0.757895	0.00017	2.23008	0.025742	#ERROR!
OLFML2B	THAP9	-0.07684	0.118496	0.468421	0.043093	2.22998	0.025749	0/+
ASPA	THAP9	0.180735	0.000218	0.645614	0.00283	2.22982	0.02576	#ERROR!
ANAPC13	THAP9	0.480738	0	0.803509	3.42e-05	2.22788	0.025888	#ERROR!
DEPTOR	THAP9	0.210757	1.53e-05	0.663158	0.001968	2.22779	0.025895	#ERROR!
CYP2A7P1	THAP9	0.106454	0.03034	-0.44426	0.056701	-2.22748	0.025915	#ERROR!
ADAMTS10	THAP9	0.00318	0.948565	0.52807	0.020124	2.2271	0.025941	0/+
ERAP1	THAP9	0.295149	9.11e-10	0.710526	0.000651	2.2262	0.026001	#ERROR!
COL5A1	THAP9	-0.1087	0.026993	0.442105	0.058057	2.22592	0.026019	-/0
PRX	THAP9	0.217295	8.14e-06	0.666667	0.001825	2.22564	0.026038	#ERROR!
HTR3E-AS1	THAP9	0.221198	5.53e-06	-0.34427	0.148936	-2.22539	0.026055	#ERROR!
BCO1	THAP9	0.248529	3.02e-07	0.684511	0.001225	2.2249	0.026088	#ERROR!
LINC02226	THAP9	0.112888	0.0216	-0.43836	0.060472	-2.22436	0.026125	#ERROR!
SLIT2	THAP9	0.016145	0.743271	0.536842	0.01779	2.22434	0.026126	0/+
CEP41	THAP9	0.267014	3.45e-08	0.694737	0.000963	2.22375	0.026165	#ERROR!
CD300LF	THAP9	-0.16403	0.000808	0.39491	0.094263	2.22268	0.026237	-/0
RNA5SP298	THAP9	0.338247	1.54e-12	-0.22699	0.350024	-2.22268	0.026237	#ERROR!
OR2D3	THAP9	0.185842	0.000143	-0.37573	0.112891	-2.22262	0.026242	#ERROR!
NUDT7	THAP9	0.153897	0.001686	0.62807	0.003983	2.22255	0.026246	#ERROR!
AIG1P1	THAP9	0.172046	0.000438	-0.3873	0.101368	-2.21988	0.026427	#ERROR!
RPSAP53	THAP9	0.027262	0.580174	0.5437	0.01612	2.21886	0.026496	0/+
HSPA12B	THAP9	-0.05127	0.298026	0.485965	0.034898	2.21868	0.026509	0/+
OR2H2	THAP9	0.128301	0.008963	-0.4243	0.070203	-2.21817	0.026544	#ERROR!
CRYGD	THAP9	0.076852	0.118454	0.577622	0.009599	2.21794	0.026559	0/+
ID3	THAP9	0.124511	0.011224	0.608772	0.005672	2.21765	0.026579	#ERROR!
AMH	THAP9	0.244578	4.7e-07	-0.32042	0.181071	-2.21746	0.026592	#ERROR!
CFAP20DC-AS1	THAP9	0.103413	0.03543	-0.44459	0.056496	-2.21732	0.026601	#ERROR!
RN7SL498P	THAP9	0.171287	0.000464	-0.3873	0.101368	-2.2169	0.02663	#ERROR!
MINPP1	THAP9	0.431051	0	0.778947	8.5e-05	2.21649	0.026658	#ERROR!
BCRP7	THAP9	0.103595	0.035105	-0.44426	0.056701	-2.21646	0.02666	#ERROR!
OR6B2	THAP9	0.062529	0.2042	0.567668	0.011238	2.21634	0.026668	0/+
MS4A6A	THAP9	-0.16461	0.000773	0.392982	0.096027	2.21626	0.026674	-/0
CTSK	THAP9	-0.10172	0.038558	0.445614	0.055863	2.21568	0.026713	-/0
MIGA1	THAP9	0.577901	0	0.845614	5.13e-06	2.21553	0.026724	#ERROR!
PLAAT1	THAP9	0.239033	8.64e-07	-0.32499	0.174584	-2.21443	0.026799	#ERROR!
COMMD2	THAP9	0.446217	0	0.785965	6.63e-05	2.21389	0.026836	#ERROR!
OR2C1	THAP9	0.213337	1.2e-05	0.662628	0.001991	2.21389	0.026837	#ERROR!
KRT27	THAP9	-0.03461	0.482531	0.497627	0.030158	2.21369	0.02685	0/+
PIGBOS1	THAP9	0.364934	1.73e-14	0.745614	0.000248	2.21243	0.026937	#ERROR!
PARP9	THAP9	0.205736	2.46e-05	0.657895	0.0022	2.2122	0.026953	#ERROR!
SCARNA18	THAP9	0.263116	5.53e-08	-0.30123	0.210111	-2.21201	0.026966	#ERROR!
FUT8	THAP9	0.299702	4.87e-10	0.71115	0.000641	2.21197	0.026969	#ERROR!
ALMS1P1	THAP9	0.342663	7.54e-13	0.734022	0.000347	2.21185	0.026977	#ERROR!
ERCC3	THAP9	0.492002	0	0.807018	2.97e-05	2.20969	0.027127	#ERROR!
MTFMT	THAP9	0.396922	0	0.761404	0.000153	2.20907	0.02717	#ERROR!
DNAJB9	THAP9	0.35216	1.57e-13	0.738596	0.000304	2.20877	0.027191	#ERROR!
KDELR3	THAP9	0.171659	0.000451	0.636842	0.003366	2.20873	0.027193	#ERROR!
DRAM1	THAP9	0.045205	0.35889	0.554386	0.013769	2.20869	0.027197	0/+
PKD1L1	THAP9	0.252836	1.85e-07	0.684511	0.001225	2.20738	0.027287	#ERROR!
CBX1	THAP9	0.519496	0	0.819298	1.78e-05	2.20706	0.02731	#ERROR!
LINC00905	THAP9	0.168629	0.00057	-0.3873	0.101368	-2.20647	0.027351	#ERROR!
RNU6-509P	THAP9	0.250286	2.48e-07	-0.31235	0.192933	-2.20645	0.027352	#ERROR!
PHETA2	THAP9	0.121966	0.013013	0.605263	0.006034	2.20633	0.027361	#ERROR!
LOC100419046	THAP9	0.364015	2.04e-14	-0.1947	0.424437	-2.2059	0.027391	#ERROR!
ARPIN	THAP9	0.359729	4.31e-14	0.742105	0.000275	2.20533	0.027431	#ERROR!
SLX1B-SULT1A4	THAP9	0.285171	3.46e-09	0.702225	0.000802	2.20457	0.027484	#ERROR!
CCT5P1	THAP9	0.291229	1.55e-09	-0.27148	0.260896	-2.20453	0.027487	#ERROR!
LINC01356	THAP9	-0.01813	0.713052	0.507944	0.026397	2.20346	0.027562	0/+
ESRRG	THAP9	0.403119	0	0.763828	0.000141	2.20304	0.027592	#ERROR!
C1QC	THAP9	-0.21793	7.65e-06	0.342105	0.151672	2.20298	0.027596	-/0
LINC01014	THAP9	0.067905	0.167873	-0.46967	0.042466	-2.20182	0.027678	0/-
SHC4	THAP9	0.147533	0.002619	0.62072	0.004569	2.20145	0.027704	#ERROR!
HAPLN2	THAP9	0.161412	0.000981	0.629175	0.003901	2.20014	0.027797	#ERROR!
MTATP6P26	THAP9	0.257979	1.02e-07	0.686411	0.001172	2.20007	0.027802	#ERROR!
SARM1	THAP9	0.495205	0	0.807372	2.93e-05	2.19742	0.02799	#ERROR!
RPSAP34	THAP9	0.166171	0.000688	-0.3873	0.101368	-2.19683	0.028033	#ERROR!
LINC02139	THAP9	-0.04495	0.361644	0.486369	0.034725	2.19655	0.028053	0/+
CDK6	THAP9	-0.05898	0.231157	0.475439	0.039655	2.19597	0.028094	0/+
HCG11	THAP9	0.143905	0.003341	0.617544	0.004843	2.19595	0.028095	#ERROR!
OR11M1P	THAP9	0.165934	0.0007	-0.3873	0.101368	-2.1959	0.028099	#ERROR!
LINC01006	THAP9	0.097195	0.048117	0.5871	0.008223	2.19447	0.028202	#ERROR!
PAAF1	THAP9	0.410827	0	0.766667	0.000129	2.19394	0.02824	#ERROR!
LOC102724776	THAP9	0.265874	3.96e-08	-0.29418	0.221517	-2.1938	0.02825	#ERROR!
LINC02401	THAP9	0.165064	0.000747	-0.3873	0.101368	-2.19249	0.028344	#ERROR!
LINC02015	THAP9	-0.00223	0.963925	0.517517	0.023246	2.19236	0.028353	0/+
BBS10	THAP9	0.587842	0	0.848113	4.5e-06	2.19182	0.028393	#ERROR!
DCLRE1A	THAP9	0.652075	0	0.874945	9.49e-07	2.19129	0.028431	#ERROR!
RASSF9	THAP9	0.032232	0.513104	0.542105	0.016497	2.19128	0.028431	0/+
RNVU1-22	THAP9	0.298064	6.11e-10	-0.26128	0.27993	-2.19122	0.028436	#ERROR!
FZD2	THAP9	0.104749	0.03311	0.591488	0.007643	2.19101	0.028451	#ERROR!
RN7SL446P	THAP9	0.164622	0.000773	-0.3873	0.101368	-2.19076	0.028469	#ERROR!
IGDCC4	THAP9	0.101779	0.038452	0.589474	0.007905	2.19066	0.028476	#ERROR!
DNAJC27-AS1	THAP9	0.380878	8.88e-16	0.751207	0.00021	2.1903	0.028502	#ERROR!
LINC02764	THAP9	0.059471	0.227251	-0.47388	0.0404	-2.19019	0.028511	0/-
LINC01994	THAP9	0.164384	0.000787	-0.3873	0.101368	-2.18982	0.028537	#ERROR!
LOC100288846	THAP9	0.371158	5.77e-15	0.746154	0.000244	2.18963	0.028551	#ERROR!
PCYOX1	THAP9	0.459227	0	0.789474	5.84e-05	2.18676	0.02876	#ERROR!
BOD1L1	THAP9	0.599357	0	0.852632	3.54e-06	2.18625	0.028797	#ERROR!
RN7SL189P	THAP9	0.211261	1.46e-05	-0.34427	0.148936	-2.18566	0.028841	#ERROR!
RN7SL284P	THAP9	0.163084	0.000867	-0.3873	0.101368	-2.18473	0.028908	#ERROR!
RPL23AP11	THAP9	0.181577	0.000204	-0.37097	0.117901	-2.18469	0.028911	#ERROR!
RNU6-1147P	THAP9	0.16283	0.000883	-0.3873	0.101368	-2.18374	0.028981	#ERROR!
FGF16	THAP9	-0.06702	0.173513	0.466609	0.044017	2.18349	0.029	0/+
CDH9	THAP9	0.105801	0.031376	0.59084	0.007727	2.18316	0.029024	#ERROR!
GNB4	THAP9	-0.0067	0.891963	0.512281	0.024931	2.18222	0.029093	0/+
LOC100419928	THAP9	0.071565	0.146058	0.567673	0.011237	2.18178	0.029126	0/+
GALNT13	THAP9	0.135964	0.005589	0.610111	0.005538	2.18136	0.029156	#ERROR!
ADAM3A	THAP9	0.164752	0.000765	-0.38503	0.103561	-2.18109	0.029177	#ERROR!
ASB16-AS1	THAP9	0.550693	0	0.831066	1.05e-05	2.18103	0.029181	#ERROR!
RPL10AP7	THAP9	0.177982	0.000273	0.636376	0.003397	2.18088	0.029192	#ERROR!
LOC101928392	THAP9	0.119626	0.014875	0.599428	0.006678	2.18047	0.029223	#ERROR!
LOC100130881	THAP9	0.202932	3.18e-05	0.651412	0.002516	2.18012	0.029249	#ERROR!
FAM180A	THAP9	-0.12318	0.012127	0.42036	0.073133	2.18005	0.029254	-/0
KIAA1328	THAP9	0.50929	0	0.812281	2.39e-05	2.17999	0.029258	#ERROR!
CACNA1S	THAP9	0.164288	0.000792	-0.38514	0.103448	-2.17979	0.029273	#ERROR!
APOL3	THAP9	-0.01063	0.829324	0.508772	0.026112	2.17912	0.029323	0/+
FNDC3A	THAP9	0.464685	0	0.791228	5.47e-05	2.17813	0.029397	#ERROR!
GPR174	THAP9	0.042062	0.393317	0.54659	0.015455	2.17806	0.029402	0/+
CYSLTR1	THAP9	0.071076	0.148844	0.566667	0.011415	2.178	0.029406	0/+
RN7SL605P	THAP9	0.272139	1.83e-08	0.691347	0.001044	2.17783	0.029419	#ERROR!
LOC101928834	THAP9	-0.10297	0.036222	0.43654	0.06167	2.17755	0.029439	-/0
LOC100130370	THAP9	0.288264	2.3e-09	0.700191	0.000844	2.17647	0.02952	#ERROR!
AGBL4-IT1	THAP9	0.160845	0.001023	-0.3873	0.101368	-2.17597	0.029558	#ERROR!
RNU6-930P	THAP9	0.386376	4.44e-16	-0.16158	0.508712	-2.1747	0.029653	#ERROR!
SIGLEC12	THAP9	-0.1366	0.005369	0.407733	0.083124	2.17396	0.029708	-/0
OR7E55P	THAP9	0.173478	0.000391	-0.37573	0.112891	-2.17392	0.029711	#ERROR!
LOC100130731	THAP9	0.091524	0.062814	0.579751	0.009275	2.17381	0.029719	0/+
RNU6-890P	THAP9	0.334126	2.96e-12	-0.21918	0.367296	-2.17363	0.029733	#ERROR!
CLEC11A	THAP9	-0.19127	8.99e-05	0.359649	0.130437	2.17317	0.029767	-/0
CERT1	THAP9	0.506941	0	0.810526	2.58e-05	2.17248	0.029819	#ERROR!
RNU6-517P	THAP9	0.095709	0.051658	-0.44097	0.05878	-2.1705	0.029969	0/0
APAF1	THAP9	0.589787	0	0.847368	4.68e-06	2.17038	0.029978	#ERROR!
RNU4-2	THAP9	0.079781	0.105021	0.571054	0.010657	2.16935	0.030056	0/+
CEP295	THAP9	0.663945	0	0.878456	7.54e-07	2.16932	0.030059	#ERROR!
SHE	THAP9	0.156417	0.00141	0.621053	0.004541	2.16885	0.030094	#ERROR!
GLIPR1L1	THAP9	0.407271	0	0.762122	0.000149	2.16854	0.030118	#ERROR!
CAPNS1P1	THAP9	0.169036	0.000553	-0.37845	0.11011	-2.16852	0.030119	#ERROR!
MIR3174	THAP9	0.215422	9.78e-06	0.657132	0.002236	2.16845	0.030125	#ERROR!
HLA-J	THAP9	0.023797	0.62923	0.531812	0.019101	2.16833	0.030134	0/+
OR8B8	THAP9	0.158697	0.001196	-0.3873	0.101368	-2.16757	0.030192	#ERROR!
LOC107984208	THAP9	0.158664	0.001199	-0.3873	0.101368	-2.16744	0.030201	#ERROR!
MAFTRR	THAP9	0.212539	1.29e-05	0.655249	0.002325	2.16736	0.030207	#ERROR!
EIF3LP1	THAP9	0.192227	8.28e-05	0.642938	0.002986	2.16699	0.030235	#ERROR!
RN7SL333P	THAP9	0.545212	0	0.04306	0.861054	-2.16676	0.030253	#ERROR!
PTPRD-AS1	THAP9	-0.0513	0.297747	0.475439	0.039655	2.16661	0.030265	0/+
RPP30	THAP9	0.312757	7.6e-11	0.712281	0.000623	2.16578	0.030328	#ERROR!
NBPF15	THAP9	0.478352	0	0.796491	4.49e-05	2.16539	0.030358	#ERROR!
PDGFC	THAP9	-0.00698	0.887425	0.508772	0.026112	2.16521	0.030371	0/+
RBBP9	THAP9	0.497119	0	0.805263	3.19e-05	2.16477	0.030405	#ERROR!
CERS6-AS1	THAP9	0.145308	0.003043	-0.39811	0.091388	-2.16405	0.030461	#ERROR!
RPS2P42	THAP9	0.062097	0.207354	0.557983	0.013042	2.16397	0.030467	0/+
PRKD3	THAP9	0.483091	0	0.798596	4.14e-05	2.16394	0.030469	#ERROR!
COL1A1	THAP9	-0.14099	0.004049	0.401754	0.08819	2.16377	0.030482	-/0
APOH	THAP9	0.089761	0.068072	-0.44426	0.056701	-2.16324	0.030523	0/0
IQSEC2	THAP9	0.355992	8.17e-14	0.735088	0.000336	2.1628	0.030556	#ERROR!
GRM6	THAP9	0.225021	3.76e-06	0.661973	0.002019	2.16266	0.030567	#ERROR!
RPL12P20	THAP9	0.205439	2.53e-05	-0.34427	0.148936	-2.16246	0.030583	#ERROR!
ATP11A-AS1	THAP9	0.147872	0.002559	-0.39547	0.093756	-2.16209	0.030612	#ERROR!
PBX2	THAP9	0.442692	0	0.778947	8.5e-05	2.16165	0.030645	#ERROR!
HRAT92	THAP9	0.134524	0.006119	0.605905	0.005966	2.16152	0.030655	#ERROR!
RNA5SP288	THAP9	0.069019	0.160989	0.56221	0.012228	2.16094	0.0307	0/+
CDRT15P3	THAP9	0.156863	0.001365	-0.3873	0.101368	-2.1604	0.030742	#ERROR!
RN7SKP125	THAP9	0.15677	0.001374	-0.3873	0.101368	-2.16004	0.03077	#ERROR!
SEPTIN7P1	THAP9	0.213581	1.17e-05	-0.33608	0.159488	-2.15963	0.030801	#ERROR!
RNU6-490P	THAP9	0.25024	2.49e-07	-0.30123	0.210111	-2.15947	0.030814	#ERROR!
KIAA0825	THAP9	0.449375	0	0.781922	7.66e-05	2.15885	0.030862	#ERROR!
LINC01206	THAP9	0.189649	0.000103	-0.35784	0.132529	-2.15883	0.030864	#ERROR!
SCN1A	THAP9	0.139555	0.004443	-0.40127	0.088612	-2.15599	0.031084	#ERROR!
GOLM1	THAP9	0.258802	9.23e-08	0.680702	0.001337	2.15586	0.031095	#ERROR!
CCNG2P1	THAP9	0.165693	0.000713	-0.37845	0.11011	-2.15541	0.03113	#ERROR!
MIR601	THAP9	0.066069	0.179691	-0.46154	0.046683	-2.15523	0.031144	0/-
PACS1	THAP9	0.23792	9.74e-07	0.668421	0.001757	2.15479	0.031178	#ERROR!
HNF1A-AS1	THAP9	0.313673	6.64e-11	-0.23598	0.330757	-2.15405	0.031236	#ERROR!
OR10B1P	THAP9	-0.02936	0.551325	-0.53311	0.018755	-2.15402	0.031239	0/-
CALCRL	THAP9	0.165904	0.000702	0.624561	0.004255	2.15358	0.031273	#ERROR!
RNU6-563P	THAP9	0.12311	0.01218	-0.41464	0.077539	-2.15338	0.031289	#ERROR!
H2AC9P	THAP9	0.332899	3.59e-12	-0.21517	0.376351	-2.15232	0.031372	#ERROR!
LOC100507642	THAP9	0.037524	0.446377	0.538596	0.017351	2.15219	0.031382	0/+
CCDC112	THAP9	0.419937	0	0.766667	0.000129	2.15197	0.0314	#ERROR!
DCN	THAP9	-0.11715	0.017095	0.419298	0.073937	2.1518	0.031413	-/0
MXRA5	THAP9	0.001291	0.979108	0.512281	0.024931	2.15178	0.031415	0/+
POT1	THAP9	0.427176	0	0.770175	0.000115	2.151	0.031476	#ERROR!
NUDT6	THAP9	0.495034	0	0.802984	3.49e-05	2.15073	0.031498	#ERROR!
INMT	THAP9	-0.01948	0.69273	0.496491	0.030596	2.15023	0.031537	0/+
KIF4B	THAP9	0.276017	1.13e-08	-0.27352	0.257178	-2.14989	0.031564	#ERROR!
LINC01241	THAP9	0.154149	0.001656	-0.3873	0.101368	-2.14979	0.031571	#ERROR!
MIR921	THAP9	0.202226	3.4e-05	-0.34427	0.148936	-2.14968	0.03158	#ERROR!
LST1	THAP9	-0.21375	1.15e-05	0.333333	0.163139	2.14851	0.031673	-/0
RPL7AP55	THAP9	0.187948	0.00012	0.637409	0.003329	2.1482	0.031697	#ERROR!
NR2F1	THAP9	0.107522	0.028707	0.585965	0.008379	2.1481	0.031706	#ERROR!
MIR7849	THAP9	0.180042	0.000231	0.632456	0.003664	2.14776	0.031733	#ERROR!
JPH4	THAP9	0.14538	0.003028	0.610526	0.005497	2.14727	0.031772	#ERROR!
RFXAP	THAP9	0.542445	0	0.824561	1.41e-05	2.14707	0.031788	#ERROR!
LINC01405	THAP9	0.085528	0.082183	-0.44426	0.056701	-2.14697	0.031795	0/0
RNU6-482P	THAP9	0.170656	0.000488	-0.37186	0.11695	-2.14568	0.031898	#ERROR!
FSCN3	THAP9	0.324128	1.4e-11	-0.22286	0.35909	-2.14566	0.0319	#ERROR!
EZH2	THAP9	0.400861	0	-0.13684	0.576417	-2.1436	0.032065	#ERROR!
CAPSL	THAP9	0.034155	0.488274	0.534517	0.018387	2.14322	0.032096	0/+
CP	THAP9	-0.04741	0.335869	0.473684	0.040494	2.14314	0.032102	0/+
PYROXD2	THAP9	0.27735	9.51e-09	0.689474	0.001091	2.1427	0.032138	#ERROR!
AMZ2	THAP9	0.486636	0	0.798246	4.2e-05	2.14259	0.032146	#ERROR!
ATG4C	THAP9	0.474632	0	0.792453	5.23e-05	2.14199	0.032194	#ERROR!
MIR6075	THAP9	0.2001	4.12e-05	-0.34442	0.148737	-2.14192	0.0322	#ERROR!
PIGK	THAP9	0.425841	0	0.768421	0.000121	2.14084	0.032287	#ERROR!
LINC02105	THAP9	0.151796	0.001953	-0.3873	0.101368	-2.14061	0.032305	#ERROR!
RNA5SP106	THAP9	0.151592	0.001981	-0.3873	0.101368	-2.13982	0.03237	#ERROR!
RPS27P18	THAP9	-0.05167	0.294214	0.469668	0.042466	2.13973	0.032377	0/+
LOC105371264	THAP9	0.151442	0.002002	-0.3873	0.101368	-2.13923	0.032417	#ERROR!
KDM3B	THAP9	0.627813	0	0.861404	2.17e-06	2.1382	0.032501	#ERROR!
CORO2B	THAP9	0.129225	0.008478	0.598508	0.006784	2.13784	0.03253	#ERROR!
LINC00205	THAP9	0.385792	4.44e-16	0.747696	0.000233	2.13782	0.032531	#ERROR!
PIGV	THAP9	0.483953	0	0.796491	4.49e-05	2.13761	0.032549	#ERROR!
FAM66C	THAP9	0.390053	2.22e-16	0.749781	0.000219	2.13678	0.032616	#ERROR!
MBTPS2	THAP9	0.395687	0	0.752632	0.000201	2.13633	0.032652	#ERROR!
PGPEP1	THAP9	0.368695	8.88e-15	0.738596	0.000304	2.13633	0.032652	#ERROR!
LRRC34	THAP9	0.348738	2.78e-13	0.727832	0.000412	2.13489	0.03277	#ERROR!
LINC01743	THAP9	0.150003	0.002212	-0.3873	0.101368	-2.13362	0.032874	#ERROR!
DKK2	THAP9	0.070463	0.152387	0.558243	0.012991	2.13338	0.032894	0/+
MIR4427	THAP9	0.162871	0.000881	-0.37573	0.112891	-2.13231	0.032981	#ERROR!
LINC02535	THAP9	0.102023	0.037986	0.57952	0.00931	2.13209	0.032999	#ERROR!
CHST9	THAP9	0.141135	0.004009	0.605263	0.006034	2.13197	0.03301	#ERROR!
MIR3176	THAP9	0.432459	0	-0.09606	0.695643	-2.13178	0.033025	#ERROR!
ABCC6P2	THAP9	0.048796	0.321956	0.542752	0.016343	2.13153	0.033045	0/+
KCTD14	THAP9	0.072981	0.138224	0.559649	0.012717	2.13152	0.033046	0/+
LRRC55	THAP9	0.128221	0.009007	0.596766	0.00699	2.1314	0.033056	#ERROR!
CLCN4	THAP9	0.286274	3e-09	0.692982	0.001004	2.13136	0.03306	#ERROR!
MAP6	THAP9	0.12787	0.009198	0.596491	0.007023	2.13113	0.033078	#ERROR!
RN7SL79P	THAP9	0.088622	0.071658	-0.43836	0.060472	-2.13091	0.033097	0/0
KRTAP3-2	THAP9	0.097399	0.047648	-0.4311	0.065363	-2.13054	0.033127	#ERROR!
SLC30A6P1	THAP9	0.117056	0.017185	-0.41464	0.077539	-2.12996	0.033175	#ERROR!
IGHD1-20	THAP9	0.008119	0.86918	-0.50098	0.028893	-2.1297	0.033197	0/-
LINC00928	THAP9	0.166518	0.00067	-0.37186	0.11695	-2.12945	0.033217	#ERROR!
ACOD1	THAP9	-0.08217	0.094971	0.443275	0.057318	2.12942	0.03322	0/0
LINC01514	THAP9	0.148902	0.002385	-0.3873	0.101368	-2.12933	0.033227	#ERROR!
LAIR1	THAP9	-0.17794	0.000274	0.361562	0.128255	2.12896	0.033257	-/0
NCAN	THAP9	0.293142	1.2e-09	-0.25102	0.299917	-2.12882	0.033269	#ERROR!
IFI6	THAP9	-0.02772	0.573885	0.485965	0.034898	2.12876	0.033274	0/+
DCAF13P1	THAP9	0.256853	1.16e-07	0.675695	0.001497	2.12848	0.033297	#ERROR!
LOC100420583	THAP9	0.148577	0.002439	-0.3873	0.101368	-2.12806	0.033332	#ERROR!
LINC02677	THAP9	-0.15638	0.001414	0.380307	0.108228	2.12724	0.0334	-/0
ENDOD1	THAP9	0.084515	0.085887	0.566667	0.011415	2.12645	0.033465	0/+
C14orf132	THAP9	0.084663	0.085338	0.566667	0.011415	2.12589	0.033513	0/+
GOLM2	THAP9	0.508495	0	0.807018	2.97e-05	2.12584	0.033517	#ERROR!
LGR6	THAP9	0.061845	0.209206	0.550877	0.014508	2.12582	0.033518	0/+
SEC22C	THAP9	0.322317	1.84e-11	0.712281	0.000623	2.12526	0.033565	#ERROR!
FOXD4L6	THAP9	0.178685	0.000258	-0.36004	0.129987	-2.12522	0.033568	#ERROR!
FAM187B2P	THAP9	0.345631	4.64e-13	0.724894	0.000446	2.12465	0.033616	#ERROR!
PCMTD2	THAP9	0.663237	0	0.875439	9.19e-07	2.12434	0.033641	#ERROR!
BNIP3P9	THAP9	0.108514	0.02726	0.582478	0.008873	2.12409	0.033662	#ERROR!
COG2	THAP9	0.58471	0	0.841597	6.29e-06	2.12322	0.033735	#ERROR!
ITGB8	THAP9	0.201036	3.78e-05	0.641509	0.003071	2.1228	0.033771	#ERROR!
EGR2	THAP9	-0.02151	0.662519	0.489474	0.033415	2.12265	0.033783	0/+
LOC105374516	THAP9	0.195005	6.49e-05	-0.34442	0.148737	-2.12171	0.033862	#ERROR!
MTCYBP12	THAP9	0.06657	0.176408	0.553399	0.013974	2.12156	0.033874	0/+
BIRC8	THAP9	0.146876	0.002738	-0.3873	0.101368	-2.12143	0.033886	#ERROR!
NPTN	THAP9	0.333069	3.5e-12	0.717544	0.000543	2.12038	0.033974	#ERROR!
SLC9A6	THAP9	0.505905	0	0.805263	3.19e-05	2.12003	0.034004	#ERROR!
RNA5SP535	THAP9	0.12823	0.009002	0.594817	0.007225	2.11985	0.034019	#ERROR!
MGA	THAP9	0.655587	0	0.87193	1.15e-06	2.11943	0.034054	#ERROR!
HMGB1P33	THAP9	0.239824	7.93e-07	-0.30123	0.210111	-2.11723	0.034241	#ERROR!
EVX2	THAP9	0.207877	2.01e-05	0.644746	0.00288	2.11662	0.034292	#ERROR!
LOC101929331	THAP9	0.042431	0.389172	0.535386	0.018162	2.11626	0.034322	0/+
CCDC88C	THAP9	0.413835	0	0.759649	0.000161	2.11606	0.034339	#ERROR!
RNU2-68P	THAP9	0.27203	1.86e-08	-0.26928	0.264925	-2.11601	0.034344	#ERROR!
RPL21P35	THAP9	0.137477	0.005077	0.600219	0.006587	2.11599	0.034345	#ERROR!
LEP	THAP9	0.123296	0.012049	-0.40632	0.084303	-2.11593	0.034351	#ERROR!
CHN2	THAP9	0.420846	0	0.763158	0.000144	2.11553	0.034385	#ERROR!
DHX29	THAP9	0.481148	0	0.792982	5.13e-05	2.11524	0.03441	#ERROR!
LINC02494	THAP9	0.145272	0.00305	-0.3873	0.101368	-2.11518	0.034414	#ERROR!
RPL9P22	THAP9	0.156426	0.001409	-0.37754	0.111035	-2.11511	0.03442	#ERROR!
HNRNPA3P14	THAP9	0.123233	0.012093	0.590707	0.007744	2.11505	0.034426	#ERROR!
MTND5P30	THAP9	0.145223	0.00306	-0.3873	0.101368	-2.11499	0.03443	#ERROR!
LINC02037	THAP9	0.140638	0.004142	0.601898	0.006399	2.11373	0.034539	#ERROR!
IL7	THAP9	0.229416	2.39e-06	0.657306	0.002227	2.1135	0.034558	#ERROR!
RNU7-110P	THAP9	0.14477	0.003154	-0.3873	0.101368	-2.11323	0.034581	#ERROR!
PCDHB4	THAP9	0.163353	0.00085	0.61633	0.004952	2.11256	0.034638	#ERROR!
ITFG1	THAP9	0.377455	1.78e-15	0.740351	0.000289	2.1123	0.034661	#ERROR!
CEP120	THAP9	0.575973	0	0.836842	7.95e-06	2.11214	0.034674	#ERROR!
HOXB5	THAP9	0.24154	6.57e-07	0.664327	0.00192	2.11208	0.03468	#ERROR!
RAB42	THAP9	0.167206	0.000636	0.618692	0.004743	2.11201	0.034685	#ERROR!
RGS18	THAP9	-0.05936	0.228087	0.457895	0.048674	2.11196	0.03469	0/+
OSBPL10-AS1	THAP9	0.195071	6.45e-05	-0.34202	0.151774	-2.11161	0.03472	#ERROR!
SLC16A2	THAP9	0.035901	0.466308	0.529825	0.019639	2.1116	0.034721	0/+
DARS1	THAP9	0.418369	0	0.761404	0.000153	2.11102	0.03477	#ERROR!
ABHD8	THAP9	0.254694	1.49e-07	0.67193	0.001627	2.111	0.034772	#ERROR!
LYRM2	THAP9	0.504086	0	0.803509	3.42e-05	2.11039	0.034825	#ERROR!
PARP6	THAP9	0.254912	1.46e-07	0.67193	0.001627	2.11011	0.034849	#ERROR!
RNU1-98P	THAP9	0.143965	0.003328	-0.3873	0.101368	-2.1101	0.03485	#ERROR!
ADH1A	THAP9	0.366537	1.31e-14	0.7343	0.000344	2.11006	0.034854	#ERROR!
MIR26A2	THAP9	0.173578	0.000388	0.622347	0.004434	2.10965	0.034889	#ERROR!
MC4R	THAP9	-0.01671	0.734549	0.490481	0.032999	2.10941	0.034909	0/+
NUDT12	THAP9	0.407374	0	0.755595	0.000183	2.1094	0.03491	#ERROR!
NCF4	THAP9	-0.09113	0.063962	0.431579	0.06503	2.10868	0.034972	0/0
OLFM1	THAP9	-0.00851	0.862996	0.496491	0.030596	2.1084	0.034996	0/+
ASB12	THAP9	0.251012	2.28e-07	0.669308	0.001724	2.10783	0.035046	#ERROR!
RAB29	THAP9	0.304398	2.52e-10	0.7	0.000848	2.10762	0.035064	#ERROR!
HOXA6	THAP9	0.415314	0	0.759438	0.000162	2.10736	0.035087	#ERROR!
C3orf22	THAP9	0.143246	0.00349	-0.3873	0.101368	-2.1073	0.035092	#ERROR!
RPL37P21	THAP9	0.143202	0.0035	-0.3873	0.101368	-2.10713	0.035107	#ERROR!
NXN	THAP9	-0.12634	0.010079	0.401754	0.08819	2.10691	0.035126	-/0
LOC112268176	THAP9	-0.08212	0.0952	0.438357	0.060472	2.10593	0.035211	0/0
MIR581	THAP9	0.12542	0.01064	0.590373	0.007787	2.10463	0.035324	#ERROR!
CBLIF	THAP9	0.328967	6.64e-12	-0.20732	0.394406	-2.10419	0.035362	#ERROR!
HMGB3P30	THAP9	0.142394	0.003692	-0.3873	0.101368	-2.10398	0.03538	#ERROR!
GLB1	THAP9	0.371775	5.11e-15	0.736288	0.000325	2.10344	0.035428	#ERROR!
P4HA1	THAP9	0.218444	7.27e-06	0.649123	0.002637	2.10312	0.035455	#ERROR!
RN7SKP42	THAP9	0.14206	0.003774	-0.3873	0.101368	-2.10268	0.035494	#ERROR!
FCER1A	THAP9	-0.00467	0.924535	0.498246	0.029921	2.10266	0.035495	0/+
LOC100287837	THAP9	0.108157	0.027773	0.578463	0.00947	2.10239	0.035519	#ERROR!
CD101	THAP9	0.062542	0.20411	0.546971	0.015369	2.10185	0.035567	0/+
JAM2	THAP9	0.058147	0.237787	0.54386	0.016083	2.10178	0.035573	0/+
LOC107984660	THAP9	0.265181	4.31e-08	0.676642	0.001466	2.10107	0.035635	#ERROR!
PCAT2	THAP9	0.056055	0.255124	-0.45822	0.048494	-2.10087	0.035653	0/-
LINC01583	THAP9	0.001583	0.974389	-0.50016	0.029196	-2.10064	0.035673	0/-
LINC02047	THAP9	0.141499	0.003915	-0.3873	0.101368	-2.1005	0.035685	#ERROR!
RNF20	THAP9	0.444975	0	0.773684	0.000102	2.10032	0.035701	#ERROR!
PAM	THAP9	0.10171	0.038583	0.573684	0.010223	2.09997	0.035731	#ERROR!
FOCAD	THAP9	0.341142	9.65e-13	0.719298	0.000518	2.09948	0.035774	#ERROR!
LINC02461	THAP9	-0.03702	0.452552	0.472856	0.040895	2.09937	0.035784	0/+
RNU5F-3P	THAP9	0.118104	0.016207	-0.40705	0.083695	-2.09917	0.035802	#ERROR!
MUC22	THAP9	0.165886	0.000703	-0.36551	0.12383	-2.09896	0.03582	#ERROR!
GRID1	THAP9	0.028781	0.559245	0.522159	0.021829	2.09837	0.035872	0/+
MRGPRX10P	THAP9	0.14085	0.004085	-0.3873	0.101368	-2.09798	0.035907	#ERROR!
HEMGN	THAP9	0.146439	0.00282	0.602736	0.006306	2.09616	0.036068	#ERROR!
CFAP36	THAP9	0.408271	0	0.754386	0.00019	2.09459	0.036207	#ERROR!
FOXF2	THAP9	0.129376	0.008401	0.591228	0.007676	2.0943	0.036233	#ERROR!
DPT	THAP9	-0.14547	0.00301	0.382456	0.106085	2.09429	0.036234	-/0
DSTYK	THAP9	0.463949	0	0.782456	7.52e-05	2.0939	0.036268	#ERROR!
SEMA3D	THAP9	0.175586	0.000331	0.621053	0.004541	2.09371	0.036285	#ERROR!
MANEA-DT	THAP9	0.450141	0	0.775533	9.57e-05	2.09331	0.036322	#ERROR!
SIGLEC7	THAP9	-0.14381	0.003362	0.383502	0.105053	2.09251	0.036393	-/0
RNU6-1120P	THAP9	0.139292	0.004519	-0.3873	0.101368	-2.09192	0.036446	#ERROR!
ESD	THAP9	0.190079	9.97e-05	0.629825	0.003853	2.09148	0.036485	#ERROR!
SMG1P6	THAP9	0.430077	0	-0.08842	0.718881	-2.09124	0.036507	#ERROR!
JAKMIP2	THAP9	0.194945	6.53e-05	0.632734	0.003644	2.09066	0.036559	#ERROR!
MANCR	THAP9	-0.17993	0.000233	0.350975	0.140657	2.09058	0.036566	-/0
RPL7AP28	THAP9	0.016858	0.732357	0.511875	0.025065	2.09034	0.036587	0/+
IFNA5	THAP9	0.126252	0.010129	-0.39814	0.091362	-2.09018	0.036602	#ERROR!
GNS	THAP9	0.395755	0	0.747368	0.000235	2.09017	0.036603	#ERROR!
CGB3	THAP9	-0.00315	0.949035	0.496915	0.030432	2.09013	0.036606	0/+
EFCAB1	THAP9	0.070265	0.153545	0.550241	0.014646	2.09011	0.036608	0/+
MDP1	THAP9	0.343956	6.11e-13	0.719614	0.000514	2.08982	0.036634	#ERROR!
RN7SL258P	THAP9	0.395475	0	-0.12926	0.597911	-2.08979	0.036637	#ERROR!
RNU7-169P	THAP9	0.138721	0.004688	-0.3873	0.101368	-2.0897	0.036645	#ERROR!
LOC100128334	THAP9	0.138672	0.004703	-0.3873	0.101368	-2.08951	0.036662	#ERROR!
MIR6761	THAP9	0.138452	0.00477	-0.3873	0.101368	-2.08866	0.036739	#ERROR!
GUSBP5	THAP9	0.320563	2.39e-11	0.70645	0.000722	2.08798	0.0368	#ERROR!
HNRNPKP3	THAP9	0.203907	2.91e-05	0.637838	0.003301	2.0877	0.036825	#ERROR!
LOC105375744	THAP9	0.195433	6.25e-05	-0.33593	0.159686	-2.08679	0.036907	#ERROR!
CASP1	THAP9	-0.07429	0.13129	0.440351	0.059178	2.08532	0.03704	0/0
GGTLC1	THAP9	0.110229	0.024905	0.576828	0.009722	2.08504	0.037065	#ERROR!
FOXI3	THAP9	0.155053	0.001554	0.606475	0.005907	2.08502	0.037067	#ERROR!
GYPE	THAP9	0.066457	0.177142	0.546574	0.015459	2.0847	0.037097	0/+
ANG	THAP9	0.126124	0.010207	0.587358	0.008188	2.0843	0.037133	#ERROR!
FOXB1	THAP9	0.018363	0.709496	0.511665	0.025135	2.08352	0.037204	0/+
OR7E85BP	THAP9	0.136999	0.005234	-0.3873	0.101368	-2.08301	0.03725	#ERROR!
MCC	THAP9	0.181094	0.000212	0.622807	0.004396	2.08293	0.037257	#ERROR!
RNU6-1089P	THAP9	0.185282	0.00015	-0.34427	0.148936	-2.08258	0.03729	#ERROR!
LOC101929227	THAP9	0.201637	3.58e-05	-0.32902	0.168994	-2.08179	0.037362	#ERROR!
LOC101928087	THAP9	0.039496	0.422833	-0.4673	0.043665	-2.08164	0.037375	0/-
SHC3	THAP9	0.070911	0.149789	0.549123	0.01489	2.08153	0.037386	0/+
FRG2MP	THAP9	0.068309	0.165348	-0.44426	0.056701	-2.08095	0.037438	0/0
LOC100419783	THAP9	0.136384	0.005442	-0.3873	0.101368	-2.08062	0.037469	#ERROR!
LINC02382	THAP9	0.120886	0.013845	-0.40047	0.08931	-2.07997	0.037529	#ERROR!
CACNA1B	THAP9	0.137686	0.00501	0.594183	0.007303	2.07942	0.037579	#ERROR!
MIR626	THAP9	0.135955	0.005592	-0.3873	0.101368	-2.07895	0.037622	#ERROR!
MTARC2	THAP9	0.30711	1.72e-10	0.697674	0.000897	2.07889	0.037627	#ERROR!
RNF5	THAP9	0.445992	0	0.77193	0.000108	2.07888	0.037629	#ERROR!
MKNK2P1	THAP9	0.135777	0.005655	-0.3873	0.101368	-2.07826	0.037685	#ERROR!
RPL31P35	THAP9	0.069018	0.160995	0.547189	0.01532	2.07824	0.037687	0/+
PLXND1	THAP9	0.044728	0.363992	0.529825	0.019639	2.0779	0.037719	0/+
METTL7A	THAP9	0.271826	1.91e-08	0.677193	0.001448	2.07765	0.037742	#ERROR!
LAPTM4B	THAP9	0.224803	3.85e-06	0.649123	0.002637	2.07763	0.037744	#ERROR!
RNU6-1301P	THAP9	0.180078	0.00023	-0.34769	0.144666	-2.0769	0.037811	#ERROR!
CLEC3B	THAP9	-0.05447	0.268851	0.454386	0.050652	2.07634	0.037862	0/0
FBLN2	THAP9	-0.03211	0.514649	0.47193	0.041347	2.07612	0.037883	0/+
CCDC74B	THAP9	0.1358	0.005647	0.592268	0.007543	2.07548	0.037942	#ERROR!
ABCB7	THAP9	0.35532	9.17e-14	0.724002	0.000457	2.07539	0.03795	#ERROR!
RPS5P8	THAP9	0.109668	0.025654	0.574643	0.010068	2.07475	0.03801	#ERROR!
LINC00343	THAP9	0.134727	0.006041	-0.3873	0.101368	-2.07419	0.038062	#ERROR!
ABHD10	THAP9	0.529587	0	0.812281	2.39e-05	2.07402	0.038077	#ERROR!
PPAN-P2RY11	THAP9	0.148191	0.002504	0.600171	0.006593	2.07402	0.038078	#ERROR!
PRNT	THAP9	0.13467	0.006063	-0.3873	0.101368	-2.07396	0.038083	#ERROR!
SLITRK6	THAP9	0.260788	7.3e-08	0.670175	0.001691	2.07396	0.038083	#ERROR!
BBS5	THAP9	0.331253	4.65e-12	0.710526	0.000651	2.07358	0.038118	#ERROR!
LOC105371592	THAP9	0.386383	4.44e-16	0.740449	0.000288	2.07328	0.038146	#ERROR!
LOC100130587	THAP9	0.073268	0.136677	-0.43836	0.060472	-2.072	0.038266	0/0
C1orf141	THAP9	0.164135	0.000801	-0.36081	0.129107	-2.07146	0.038316	#ERROR!
FGB	THAP9	-0.0019	0.969279	-0.49691	0.030432	-2.07088	0.03837	0/-
KRT18P61	THAP9	0.269002	2.7e-08	-0.26128	0.27993	-2.07075	0.038382	#ERROR!
RNU6-774P	THAP9	0.182084	0.000195	-0.34427	0.148936	-2.06996	0.038456	#ERROR!
CACNG8	THAP9	-0.00399	0.935551	0.492281	0.032264	2.06993	0.038459	0/+
NOG	THAP9	0.000203	0.99672	0.495383	0.031029	2.0696	0.03849	0/+
API5	THAP9	0.413816	0	0.754386	0.00019	2.06916	0.038531	#ERROR!
BTBD9	THAP9	0.490473	0	0.792982	5.13e-05	2.06871	0.038573	#ERROR!
RN7SKP134	THAP9	0.147174	0.002683	0.59859	0.006775	2.06857	0.038586	#ERROR!
NT5C1B	THAP9	0.385529	4.44e-16	0.739342	0.000298	2.06779	0.03866	#ERROR!
GINM1	THAP9	0.292487	1.31e-09	0.687719	0.001137	2.06718	0.038717	#ERROR!
HPS1	THAP9	0.247922	3.24e-07	0.661404	0.002043	2.06633	0.038798	#ERROR!
LINC00517	THAP9	0.134867	0.005989	0.590049	0.00783	2.0661	0.038819	#ERROR!
MIA3	THAP9	0.545996	0	0.819298	1.78e-05	2.066	0.038829	#ERROR!
LMO7DN	THAP9	0.057554	0.242613	0.53671	0.017824	2.06556	0.03887	0/+
AIF1	THAP9	-0.22643	3.26e-06	0.301754	0.209283	2.06544	0.038882	-/0
MIR4711	THAP9	0.052659	0.285095	0.533114	0.018755	2.06507	0.038916	0/+
SERPINF1	THAP9	-0.10295	0.03627	0.412281	0.079417	2.06466	0.038956	-/0
MIR190A	THAP9	0.100097	0.041787	-0.41464	0.077539	-2.06455	0.038966	#ERROR!
C5orf22	THAP9	0.466464	0	0.780702	8e-05	2.06448	0.038972	#ERROR!
CHTF8	THAP9	0.445583	0	0.770175	0.000115	2.06433	0.038986	#ERROR!
LINC02275	THAP9	0.132147	0.007092	-0.3873	0.101368	-2.06418	0.039001	#ERROR!
MANEAL	THAP9	0.265271	4.26e-08	0.671347	0.001648	2.06372	0.039045	#ERROR!
LMX1A	THAP9	-0.04924	0.317608	0.455863	0.049812	2.06345	0.03907	0/+
BCDIN3D	THAP9	0.526793	0	0.810004	2.63e-05	2.06343	0.039072	#ERROR!
RN7SKP261	THAP9	0.226385	3.27e-06	-0.30123	0.210111	-2.06306	0.039107	#ERROR!
DPYD	THAP9	-0.05099	0.300694	0.454386	0.050652	2.06304	0.039109	0/0
GOLGA8S	THAP9	0.234596	1.39e-06	0.652807	0.002445	2.06259	0.039151	#ERROR!
NOD1	THAP9	0.391884	0	0.742105	0.000275	2.06258	0.039152	#ERROR!
LRP1B	THAP9	0.194965	6.51e-05	0.628296	0.003966	2.0625	0.03916	#ERROR!
FOXS1	THAP9	-0.03586	0.466789	0.466199	0.044229	2.06241	0.039169	0/+
KRT222	THAP9	0.138462	0.004767	0.591747	0.00761	2.06208	0.0392	#ERROR!
MIR148A	THAP9	0.260261	7.77e-08	-0.2679	0.267478	-2.06206	0.039202	#ERROR!
RUNX2	THAP9	0.076024	0.122486	0.549123	0.01489	2.06193	0.039214	0/+
GANC	THAP9	0.337182	1.82e-12	0.712281	0.000623	2.06168	0.039238	#ERROR!
LOC101928517	THAP9	0.010258	0.835163	0.501354	0.028754	2.06156	0.03925	0/+
PIGT	THAP9	0.324657	1.29e-11	0.705263	0.000744	2.06154	0.039251	#ERROR!
CBLN4	THAP9	0.002033	0.967108	0.495155	0.031118	2.06148	0.039258	0/+
MS4A4E	THAP9	0.124977	0.010922	0.582535	0.008864	2.06081	0.039322	#ERROR!
OR2H1	THAP9	0.009602	0.845564	0.500694	0.028999	2.0607	0.039332	0/+
CLDN18	THAP9	0.126641	0.009898	0.583418	0.008737	2.05946	0.039451	#ERROR!
LRP4	THAP9	0.322088	1.9e-11	0.703509	0.000777	2.0592	0.039475	#ERROR!
RNU6-479P	THAP9	0.225311	3.65e-06	-0.30123	0.210111	-2.05875	0.039519	#ERROR!
RPL21P100	THAP9	0.14898	0.002373	0.598116	0.00683	2.05872	0.039521	#ERROR!
FABP12	THAP9	0.140912	0.004068	-0.37845	0.11011	-2.05868	0.039525	#ERROR!
GRIK2	THAP9	0.159006	0.00117	0.604651	0.006099	2.0586	0.039533	#ERROR!
NOL8	THAP9	0.562522	0	0.826316	1.3e-05	2.05789	0.039601	#ERROR!
RN7SL688P	THAP9	0.231036	2.02e-06	0.649894	0.002596	2.05765	0.039624	#ERROR!
LINC00115	THAP9	0.471939	0	-0.02724	0.911855	-2.05757	0.039632	#ERROR!
LOC101929172	THAP9	0.130306	0.007939	-0.3873	0.101368	-2.05703	0.039683	#ERROR!
HEY1	THAP9	0.210052	1.64e-05	0.636842	0.003366	2.05684	0.039702	#ERROR!
PRSS35	THAP9	0.012263	0.803538	0.501754	0.028606	2.05595	0.039787	0/+
SLC38A8	THAP9	0.104833	0.032969	-0.40876	0.082276	-2.05578	0.039804	#ERROR!
LZTFL1	THAP9	0.544163	0	0.817544	1.92e-05	2.05568	0.039813	#ERROR!
MIR3153	THAP9	0.417451	0	-0.09428	0.701039	-2.0551	0.039869	#ERROR!
BPIFB3	THAP9	0.01814	0.712866	0.505967	0.027088	2.05506	0.039873	0/+
CEBPG	THAP9	0.484256	0	-0.01053	0.965886	-2.0547	0.039908	#ERROR!
AARS1	THAP9	0.301579	3.75e-10	0.691228	0.001047	2.05467	0.039911	#ERROR!
CASP4LP	THAP9	-0.06247	0.204614	0.443372	0.057258	2.05438	0.039939	0/0
IGLV5-37	THAP9	-0.03315	0.501119	0.466671	0.043986	2.05438	0.039939	0/+
CC2D2B	THAP9	0.282069	5.19e-09	0.679882	0.001362	2.05436	0.039941	#ERROR!
MIR1291	THAP9	0.300946	4.1e-10	-0.22439	0.355724	-2.05385	0.039991	#ERROR!
NR2F2-AS1	THAP9	0.282383	4.98e-09	0.679842	0.001363	2.05277	0.040095	#ERROR!
C1QTNF9	THAP9	0.11313	0.021319	0.573058	0.010325	2.05238	0.040133	#ERROR!
FLYWCH1	THAP9	0.271069	2.09e-08	0.673102	0.001586	2.05211	0.040159	#ERROR!
LINGO4	THAP9	0.152155	0.001905	0.599056	0.006721	2.05192	0.040177	#ERROR!
RNU6-110P	THAP9	0.128904	0.008644	-0.3873	0.101368	-2.0516	0.040209	#ERROR!
NVL	THAP9	0.504665	0	0.798246	4.2e-05	2.05148	0.04022	#ERROR!
RAX	THAP9	-0.05606	0.25509	0.447905	0.054464	2.05141	0.040227	0/0
GSTM5	THAP9	0.050949	0.301049	0.52918	0.019816	2.05072	0.040294	0/+
ATP6V0E2-AS1	THAP9	0.366302	1.38e-14	0.726796	0.000424	2.04975	0.040389	#ERROR!
GPHN	THAP9	0.266752	3.56e-08	0.670175	0.001691	2.04952	0.040411	#ERROR!
KRT26	THAP9	0.128334	0.008945	-0.3873	0.101368	-2.04939	0.040424	#ERROR!
LOC100129527	THAP9	0.258362	9.72e-08	-0.26656	0.269973	-2.04879	0.040483	#ERROR!
AMELY	THAP9	0.186012	0.000141	-0.33566	0.160035	-2.04839	0.040522	#ERROR!
GLT6D1	THAP9	-0.01345	0.784909	-0.50098	0.028893	-2.04746	0.040612	0/-
SLC15A3	THAP9	-0.12935	0.008413	0.385965	0.102651	2.04735	0.040623	-/0
BMS1P9	THAP9	0.129646	0.008264	-0.3857	0.102911	-2.04729	0.040629	#ERROR!
FBXO2	THAP9	-0.07596	0.12279	0.430891	0.065507	2.04724	0.040635	0/0
MPEG1	THAP9	-0.1232	0.012119	0.391228	0.097653	2.04714	0.040644	-/0
FGD5P1	THAP9	0.175689	0.000328	0.613493	0.005213	2.04676	0.040682	#ERROR!
KBTBD4	THAP9	0.538462	0	0.814035	2.23e-05	2.04643	0.040714	#ERROR!
SLC22A25	THAP9	0.148097	0.00252	-0.36926	0.11974	-2.04594	0.040763	#ERROR!
MIR4672	THAP9	0.175921	0.000322	-0.34427	0.148936	-2.04569	0.040787	#ERROR!
ACE	THAP9	0.075452	0.125334	0.545614	0.015677	2.04503	0.040852	0/+
NAA11	THAP9	0.183094	0.00018	-0.3375	0.157618	-2.04477	0.040877	#ERROR!
RNU6-1138P	THAP9	0.053427	0.278111	0.529823	0.01964	2.04465	0.040889	0/+
ACTG1P10	THAP9	0.394131	0	-0.11901	0.627475	-2.04405	0.040948	#ERROR!
LINC01701	THAP9	0.096111	0.05068	0.559882	0.012672	2.04401	0.040952	0/+
KIT	THAP9	0.199664	4.28e-05	0.62807	0.003983	2.04244	0.041108	#ERROR!
FBXL3	THAP9	0.474624	0	0.782456	7.52e-05	2.04172	0.041179	#ERROR!
LINC02724	THAP9	0.029758	0.545986	0.511982	0.02503	2.0417	0.041182	0/+
FXYD1	THAP9	-0.05416	0.271578	0.447368	0.054789	2.04159	0.041192	0/0
PCBP4	THAP9	0.164779	0.000764	0.605529	0.006006	2.04128	0.041223	#ERROR!
SERPINA12	THAP9	0.136329	0.005461	-0.37845	0.11011	-2.04086	0.041264	#ERROR!
LINC02843	THAP9	0.028774	0.559349	-0.4673	0.043665	-2.04072	0.041279	0/-
LOC100129135	THAP9	0.125955	0.010309	-0.3873	0.101368	-2.04017	0.041333	#ERROR!
HOXA11	THAP9	0.081708	0.09686	0.549123	0.01489	2.04013	0.041338	0/+
FRMD6-AS2	THAP9	0.101396	0.03919	0.562775	0.012123	2.03977	0.041374	#ERROR!
LINC01708	THAP9	0.130345	0.00792	0.582476	0.008873	2.03966	0.041384	#ERROR!
RN7SL666P	THAP9	0.125764	0.010426	-0.3873	0.101368	-2.03943	0.041407	#ERROR!
CWF19L2	THAP9	0.475171	0	0.782456	7.52e-05	2.03903	0.041447	#ERROR!
SFRP2	THAP9	-0.18804	0.000119	0.331579	0.165502	2.03889	0.041461	-/0
PTP4A1P3	THAP9	0.174143	0.000371	-0.34427	0.148936	-2.0387	0.04148	#ERROR!
RNU6-1060P	THAP9	0.12544	0.010628	-0.3873	0.101368	-2.03818	0.041532	#ERROR!
LINC00504	THAP9	0.144703	0.003168	-0.37044	0.118471	-2.03792	0.041558	#ERROR!
C5orf38	THAP9	-0.00321	0.948091	0.486464	0.034684	2.03781	0.041569	0/+
LIPT1	THAP9	0.532375	0	0.81036	2.59e-05	2.0378	0.04157	#ERROR!
DCBLD1	THAP9	0.117835	0.016453	0.573684	0.010223	2.03776	0.041574	#ERROR!
PNMA6A	THAP9	-0.08434	0.086557	0.421793	0.072058	2.03698	0.041652	0/0
MIR548AA1	THAP9	0.444556	0	-0.05642	0.818538	-2.03686	0.041664	#ERROR!
FOXL2	THAP9	-0.00472	0.923783	-0.49227	0.032269	-2.0367	0.04168	0/-
MIR6514	THAP9	0.240463	7.39e-07	-0.28126	0.243417	-2.03663	0.041687	#ERROR!
EDN1	THAP9	0.09301	0.058645	0.556384	0.013361	2.03658	0.041693	0/+
MIR6894	THAP9	0.17347	0.000391	-0.34427	0.148936	-2.03606	0.041745	#ERROR!
MIPEP	THAP9	0.312372	8.03e-11	0.694737	0.000963	2.03498	0.041853	#ERROR!
SAV1	THAP9	0.359303	4.62e-14	0.721053	0.000495	2.03447	0.041904	#ERROR!
GAA	THAP9	0.207244	2.14e-05	0.631579	0.003726	2.03447	0.041905	#ERROR!
ARHGEF6	THAP9	0.229897	2.28e-06	0.645614	0.00283	2.03413	0.041938	#ERROR!
FAM186B	THAP9	0.569966	0	0.827769	1.22e-05	2.03366	0.041986	#ERROR!
ENPP7P6	THAP9	0.257537	1.07e-07	-0.26363	0.275463	-2.03343	0.042009	#ERROR!
PDGFRA	THAP9	-0.04982	0.311876	0.449123	0.053732	2.03338	0.042014	0/0
OR56A3	THAP9	0.1241	0.011497	-0.3873	0.101368	-2.03299	0.042054	#ERROR!
C4BPAP1	THAP9	0.064601	0.189576	0.535582	0.018112	2.03256	0.042097	0/+
PRIM2	THAP9	0.463271	0	0.775779	9.49e-05	2.03243	0.04211	#ERROR!
OGN	THAP9	-0.04732	0.336803	0.450877	0.05269	2.03222	0.042131	0/0
MAF	THAP9	-0.01608	0.744298	0.475439	0.039655	2.0322	0.042134	0/+
LTBP3	THAP9	0.101382	0.039217	0.561404	0.01238	2.03218	0.042135	#ERROR!
RN7SL526P	THAP9	0.139881	0.00435	0.587536	0.008164	2.03196	0.042158	#ERROR!
MIR6895	THAP9	0.309636	1.19e-10	-0.20976	0.388754	-2.03184	0.04217	#ERROR!
LINC00398	THAP9	0.12369	0.011776	0.576613	0.009756	2.03179	0.042175	#ERROR!
RN7SL556P	THAP9	0.24476	4.61e-07	0.654252	0.002373	2.03111	0.042244	#ERROR!
CLIC2	THAP9	0.079279	0.107237	0.545614	0.015677	2.03036	0.04232	0/+
CNNM2	THAP9	0.463161	0	0.775439	9.6e-05	2.02971	0.042386	#ERROR!
FAM230B	THAP9	0.090942	0.064511	-0.41464	0.077539	-2.02933	0.042425	0/0
COL14A1	THAP9	0.023987	0.626497	0.505263	0.027337	2.02916	0.042442	0/+
ARHGEF3	THAP9	0.29861	5.67e-10	0.685965	0.001185	2.02895	0.042463	#ERROR!
CREB3L1	THAP9	-0.05956	0.226564	0.440351	0.059178	2.02893	0.042465	0/0
CD5L	THAP9	0.082878	0.09216	0.547876	0.015166	2.02884	0.042474	0/+
OOEP	THAP9	0.001591	0.97425	0.488301	0.033906	2.0287	0.042489	0/+
RN7SL851P	THAP9	0.327342	8.53e-12	-0.19005	0.435808	-2.02869	0.04249	#ERROR!
PATE2	THAP9	0.23487	1.35e-06	-0.28452	0.237758	-2.02755	0.042606	#ERROR!
C1orf115	THAP9	0.323374	1.56e-11	0.7	0.000848	2.02739	0.042623	#ERROR!
PRKX-AS1	THAP9	0.051997	0.291197	0.525487	0.020856	2.02721	0.042641	0/+
FIG4	THAP9	0.467141	0	0.777193	9.04e-05	2.02717	0.042645	#ERROR!
RN7SKP130	THAP9	0.147768	0.002577	-0.36528	0.124087	-2.02714	0.042648	#ERROR!
OR2W5P	THAP9	0.122505	0.012614	-0.3873	0.101368	-2.02682	0.042681	#ERROR!
F8A1	THAP9	0.231927	1.84e-06	0.645614	0.00283	2.02596	0.042769	#ERROR!
LINC02735	THAP9	0.12225	0.012801	-0.3873	0.101368	-2.02583	0.042782	#ERROR!
SINHCAFP3	THAP9	0.156309	0.001421	0.597207	0.006937	2.02473	0.042895	#ERROR!
FBH1	THAP9	0.509883	0	0.798246	4.2e-05	2.0247	0.042898	#ERROR!
CYP2G2P	THAP9	0.121815	0.013126	-0.3873	0.101368	-2.02415	0.042955	#ERROR!
RN7SKP76	THAP9	0.092011	0.061419	0.553399	0.013974	2.02397	0.042973	0/+
POTEI	THAP9	0.265303	4.25e-08	-0.25354	0.294938	-2.02396	0.042974	#ERROR!
DUSP12P1	THAP9	0.170371	0.000499	-0.34427	0.148936	-2.02388	0.042982	#ERROR!
CPNE8	THAP9	0.009042	0.854471	0.492982	0.031982	2.0238	0.04299	0/+
OR52U1P	THAP9	0.121703	0.013211	-0.3873	0.101368	-2.02371	0.043	#ERROR!
GNAI2	THAP9	0.12923	0.008475	0.578947	0.009396	2.02369	0.043002	#ERROR!
RN7SL837P	THAP9	0.121419	0.013428	-0.3873	0.101368	-2.02262	0.043113	#ERROR!
LINC02023	THAP9	0.121381	0.013458	-0.3873	0.101368	-2.02246	0.043128	#ERROR!
MPV17	THAP9	0.362074	2.86e-14	0.721053	0.000495	2.02232	0.043143	#ERROR!
RN7SKP259	THAP9	0.121295	0.013525	-0.3873	0.101368	-2.02213	0.043163	#ERROR!
EPS8	THAP9	0.434082	0	0.759649	0.000161	2.02197	0.043179	#ERROR!
MIR3135A	THAP9	0.236194	1.17e-06	-0.2818	0.242473	-2.02161	0.043216	#ERROR!
ARX	THAP9	0.077261	0.116502	0.542526	0.016397	2.02137	0.043242	0/+
LOC105372352	THAP9	0.375468	2.66e-15	0.728204	0.000408	2.02064	0.043317	#ERROR!
LOC286177	THAP9	0.120898	0.013835	-0.3873	0.101368	-2.0206	0.043321	#ERROR!
LINC00499	THAP9	0.120726	0.013972	-0.3873	0.101368	-2.01993	0.04339	#ERROR!
MIR579	THAP9	0.301409	3.84e-10	-0.2154	0.375818	-2.01978	0.043406	#ERROR!
ELAC2	THAP9	0.30687	1.78e-10	0.689474	0.001091	2.01967	0.043418	#ERROR!
PLXNC1	THAP9	0.050483	0.305491	0.522807	0.021637	2.01892	0.043496	0/+
RN7SL756P	THAP9	0.056415	0.252078	0.527046	0.020412	2.01855	0.043534	0/+
ARL14EP	THAP9	0.441561	0	0.763158	0.000144	2.01852	0.043537	#ERROR!
FAM118B	THAP9	0.373134	4e-15	0.726635	0.000426	2.01828	0.043563	#ERROR!
MAPK8IP1	THAP9	0.14635	0.002837	0.589474	0.007905	2.01808	0.043583	#ERROR!
RNU6-767P	THAP9	0.260858	7.24e-08	-0.25643	0.289273	-2.01756	0.043637	#ERROR!
COBL	THAP9	0.110713	0.024272	0.56516	0.011685	2.01719	0.043676	#ERROR!
LINC01734	THAP9	0.119882	0.01466	-0.3873	0.101368	-2.01667	0.04373	#ERROR!
OR7K1P	THAP9	0.119788	0.014739	-0.3873	0.101368	-2.0163	0.043768	#ERROR!
GALC	THAP9	0.418677	0	0.750877	0.000212	2.0159	0.043811	#ERROR!
BSX	THAP9	0.119516	0.014967	-0.3873	0.101368	-2.01525	0.043878	#ERROR!
C1S	THAP9	-0.18584	0.000143	0.32807	0.170297	2.01518	0.043886	-/0
LOC100288724	THAP9	0.119418	0.015051	-0.3873	0.101368	-2.01487	0.043918	#ERROR!
SMARCE1	THAP9	0.585403	0	0.833333	9.4e-06	2.01372	0.044039	#ERROR!
CEP44	THAP9	0.675182	0	0.873684	1.03e-06	2.01344	0.044069	#ERROR!
RNU6-520P	THAP9	0.09651	0.049725	-0.40643	0.084207	-2.01309	0.044105	#ERROR!
MTCO3P10	THAP9	0.118765	0.015616	-0.3873	0.101368	-2.01235	0.044183	#ERROR!
ATP6V1B2	THAP9	0.153209	0.00177	0.592982	0.007453	2.0119	0.04423	#ERROR!
ITM2A	THAP9	0.038023	0.440353	0.512281	0.024931	2.0117	0.044252	0/+
PSMF1	THAP9	0.29681	7.26e-10	0.682456	0.001285	2.01133	0.04429	#ERROR!
NXF4	THAP9	0.118459	0.015887	-0.3873	0.101368	-2.01117	0.044308	#ERROR!
MIR602	THAP9	0.120308	0.01431	-0.3857	0.102911	-2.01114	0.044311	#ERROR!
PRPH2	THAP9	0.122198	0.01284	0.57193	0.010511	2.01093	0.044332	#ERROR!
RN7SL517P	THAP9	0.154682	0.001595	-0.35541	0.135365	-2.01086	0.04434	#ERROR!
KIAA1586	THAP9	0.51984	0	0.801754	3.66e-05	2.01021	0.044409	#ERROR!
IFIT1P1	THAP9	0.275119	1.26e-08	-0.24004	0.322248	-2.00954	0.044479	#ERROR!
KCNH7-AS1	THAP9	0.117769	0.016514	-0.3873	0.101368	-2.0085	0.04459	#ERROR!
LINC01689	THAP9	0.117698	0.01658	-0.3873	0.101368	-2.00823	0.044619	#ERROR!
GBP2	THAP9	0.14627	0.002852	0.587719	0.008139	2.00816	0.044626	#ERROR!
IPO9	THAP9	0.427098	0	0.754386	0.00019	2.00766	0.04468	#ERROR!
MCPH1	THAP9	0.400888	0	0.740351	0.000289	2.00702	0.044747	#ERROR!
RN7SL833P	THAP9	0.234317	1.43e-06	0.644179	0.002913	2.00696	0.044754	#ERROR!
EIF2AP3	THAP9	0.117318	0.016936	-0.3873	0.101368	-2.00676	0.044776	#ERROR!
NEU3	THAP9	0.499254	0	0.791228	5.47e-05	2.00644	0.044809	#ERROR!
GPR52	THAP9	0.277512	9.32e-09	-0.2368	0.329021	-2.00633	0.044821	#ERROR!
NAPB	THAP9	0.556917	0	0.819298	1.78e-05	2.00617	0.044838	#ERROR!
RN7SL477P	THAP9	0.272014	1.86e-08	0.666897	0.001816	2.0053	0.044931	#ERROR!
SETP6	THAP9	0.206887	2.21e-05	-0.30605	0.202555	-2.00529	0.044932	#ERROR!
LOC101929598	THAP9	0.116912	0.017323	-0.3873	0.101368	-2.00519	0.044943	#ERROR!
MRO	THAP9	-0.09327	0.057935	0.407375	0.083421	2.00495	0.044969	0/0
PTPRN2	THAP9	0.113533	0.020858	0.564912	0.01173	2.00491	0.044973	#ERROR!
CACNA2D4	THAP9	0.016503	0.737788	0.494737	0.031283	2.0042	0.045048	0/+
BPIFB6	THAP9	0.165237	0.000738	-0.34427	0.148936	-2.00375	0.045097	#ERROR!
OR10P1	THAP9	0.116433	0.017789	-0.3873	0.101368	-2.00334	0.045141	#ERROR!
NXPE3	THAP9	0.103818	0.034712	0.557895	0.01306	2.00332	0.045143	#ERROR!
MLF1	THAP9	0.274801	1.31e-08	-0.2386	0.325255	-2.0024	0.045242	#ERROR!
LINC00578	THAP9	0.057622	0.242055	0.524792	0.021056	2.00205	0.045279	0/+
CCDC80	THAP9	-0.14761	0.002605	0.359649	0.130437	2.0018	0.045306	-/0
MSANTD4	THAP9	0.451951	0	0.766667	0.000129	2.00128	0.045362	#ERROR!
MIR4706	THAP9	0.136217	0.0055	0.579751	0.009275	2.00119	0.045372	#ERROR!
SERPINA4	THAP9	0.15443	0.001624	-0.35339	0.137754	-2.00108	0.045383	#ERROR!
SLC19A2	THAP9	0.541159	0	0.080702	0.74259	-2.0008	0.045414	#ERROR!
PCNP	THAP9	0.569018	0	0.824561	1.41e-05	2.00049	0.045448	#ERROR!
LOC153684	THAP9	0.384191	4.44e-16	0.730466	0.000383	2.0002	0.045479	#ERROR!
LINC01776	THAP9	-0.11555	0.018675	0.387298	0.101368	1.99994	0.045507	-/0
CDK15	THAP9	-0.0138	0.779556	0.470588	0.042008	1.99969	0.045534	0/+
OR10AE3P	THAP9	0.074179	0.131854	-0.42205	0.071868	-1.99921	0.045586	0/0
NAGS	THAP9	0.068496	0.164193	0.532046	0.019038	1.9988	0.04563	0/+
GIMAP5	THAP9	0.039034	0.42829	0.510526	0.025516	1.99879	0.045631	0/+
RPL7AP31	THAP9	0.300829	4.16e-10	0.682969	0.00127	1.99817	0.045698	#ERROR!
CHRM4	THAP9	0.208098	1.97e-05	0.626341	0.004115	1.99803	0.045713	#ERROR!
RN7SL705P	THAP9	0.115034	0.019217	-0.3873	0.101368	-1.99793	0.045724	#ERROR!
KCNQ3	THAP9	0.170113	0.000509	0.601754	0.006415	1.99773	0.045746	#ERROR!
CYBRD1	THAP9	-0.03819	0.438337	0.450877	0.05269	1.99735	0.045787	0/0
CCL3	THAP9	-0.16782	0.000606	0.340351	0.153919	1.99699	0.045826	-/0
LOC101929058	THAP9	0.114735	0.019534	-0.3873	0.101368	-1.99678	0.045849	#ERROR!
LINC01398	THAP9	0.267681	3.18e-08	-0.24434	0.313381	-1.99637	0.045894	#ERROR!
AHCYP3	THAP9	0.114541	0.019743	-0.3873	0.101368	-1.99603	0.045931	#ERROR!
GGTA2P	THAP9	0.520285	0	0.053025	0.829306	-1.99599	0.045935	#ERROR!
SEC63	THAP9	0.511913	0	0.796491	4.49e-05	1.99587	0.045948	#ERROR!
MIR4796	THAP9	0.163149	0.000863	-0.34427	0.148936	-1.99557	0.045981	#ERROR!
MLH3	THAP9	0.583691	0	0.831066	1.05e-05	1.99552	0.045986	#ERROR!
ORC4	THAP9	0.592398	0	0.835088	8.65e-06	1.99489	0.046055	#ERROR!
LOC100533670	THAP9	0.114183	0.020133	-0.3873	0.101368	-1.99465	0.046082	#ERROR!
CIDEA	THAP9	0.029188	0.55371	-0.45742	0.048939	-1.99441	0.046108	0/-
KCNK18	THAP9	0.114086	0.02024	-0.3873	0.101368	-1.99427	0.046123	#ERROR!
ITGB5	THAP9	0.023769	0.629638	0.498246	0.029921	1.99425	0.046125	0/+
CLIP1	THAP9	0.409672	0	-0.08772	0.721024	-1.99412	0.046139	#ERROR!
RPL9P21	THAP9	0.207629	2.06e-05	0.625384	0.00419	1.9939	0.046163	#ERROR!
RNU6-323P	THAP9	0.253415	1.73e-07	0.653903	0.002391	1.9936	0.046196	#ERROR!
DYNAP	THAP9	0.124123	0.011482	-0.37845	0.11011	-1.99353	0.046203	#ERROR!
GBA	THAP9	0.375028	2.89e-15	0.724561	0.00045	1.99319	0.04624	#ERROR!
RORC	THAP9	0.170426	0.000496	0.601141	0.006483	1.99284	0.046279	#ERROR!
NDUFAB1P1	THAP9	0.230785	2.08e-06	-0.28008	0.245487	-1.99268	0.046297	#ERROR!
LOC105377267	THAP9	0.256746	1.18e-07	0.655689	0.002304	1.99194	0.046377	#ERROR!
PI4KAP2	THAP9	0.417312	0	0.747368	0.000235	1.99172	0.046402	#ERROR!
MIR4999	THAP9	0.234204	1.45e-06	-0.27643	0.25195	-1.99138	0.046439	#ERROR!
ISCA1	THAP9	0.44731	0	0.763158	0.000144	1.99122	0.046457	#ERROR!
CHST2	THAP9	0.055359	0.261081	0.521053	0.022161	1.99109	0.046471	0/+
DNAJA1P1	THAP9	0.113153	0.021292	-0.3873	0.101368	-1.99067	0.046517	#ERROR!
CD34	THAP9	0.067608	0.169745	0.529825	0.019639	1.99041	0.046546	0/+
GXYLT1P7	THAP9	0.16182	0.000952	-0.34427	0.148936	-1.99036	0.046551	#ERROR!
SIGLEC17P	THAP9	-0.02973	0.546369	0.45614	0.049655	1.99032	0.046556	0/+
LOC100859919	THAP9	0.17615	0.000316	-0.33117	0.166051	-1.99027	0.046561	#ERROR!
EPRS1	THAP9	0.424265	0	0.750877	0.000212	1.98999	0.046592	#ERROR!
RNU6-267P	THAP9	0.112858	0.021635	-0.3873	0.101368	-1.98953	0.046643	#ERROR!
RPL35P6	THAP9	0.275233	1.24e-08	-0.23476	0.333333	-1.98867	0.046737	#ERROR!
MIR4312	THAP9	0.32765	8.14e-12	-0.17952	0.462101	-1.98846	0.04676	#ERROR!
LINC01114	THAP9	-0.00612	0.90121	0.47423	0.040232	1.98829	0.04678	0/+
RADIL	THAP9	0.051769	0.293325	0.517771	0.023167	1.98768	0.046847	0/+
DHRS7C	THAP9	-0.06408	0.193147	0.427863	0.067636	1.98759	0.046857	0/0
MTO1	THAP9	0.475246	0	0.777193	9.04e-05	1.98747	0.046871	#ERROR!
DMBT1	THAP9	0.046984	0.340278	0.514061	0.024348	1.98669	0.046956	0/+
LINC00330	THAP9	0.092458	0.060166	-0.40399	0.08627	-1.98637	0.046992	0/0
RNU6-1169P	THAP9	0.160743	0.00103	-0.34427	0.148936	-1.98615	0.047017	#ERROR!
ID4	THAP9	0.288021	2.38e-09	0.673684	0.001565	1.98607	0.047025	#ERROR!
LINC00367	THAP9	0.241882	6.33e-07	-0.26754	0.26814	-1.98582	0.047053	#ERROR!
PPIAL4D	THAP9	0.111716	0.023006	-0.3873	0.101368	-1.98512	0.047131	#ERROR!
OR2AP1	THAP9	0.111658	0.023078	-0.3873	0.101368	-1.9849	0.047156	#ERROR!
EPC2	THAP9	0.594294	0	0.835088	8.65e-06	1.98373	0.047285	#ERROR!
LOC100420899	THAP9	0.436286	0	-0.05256	0.83077	-1.983	0.047367	#ERROR!
EIF4BP3	THAP9	0.287813	2.44e-09	0.673102	0.001586	1.98288	0.047381	#ERROR!
RNU6-808P	THAP9	0.18364	0.000172	-0.3225	0.1781	-1.98276	0.047394	#ERROR!
CEP164P1	THAP9	0.416059	0	-0.07708	0.753781	-1.98265	0.047407	#ERROR!
SLX1A-SULT1A3	THAP9	0.41504	0	-0.0783	0.750019	-1.98261	0.047411	#ERROR!
RPSAP3	THAP9	0.176291	0.000313	0.603141	0.006262	1.98175	0.047507	#ERROR!
CADM1	THAP9	0.119548	0.01494	0.564912	0.01173	1.98167	0.047517	#ERROR!
CALHM2	THAP9	0.081249	0.098758	0.537955	0.01751	1.98147	0.047538	0/+
CPVL	THAP9	-0.00274	0.955624	0.475439	0.039655	1.98137	0.04755	0/+
P2RX6	THAP9	0.033366	0.498379	0.502852	0.028204	1.98106	0.047584	0/+
DCAF8L2	THAP9	0.065822	0.181329	0.526704	0.020509	1.98075	0.04762	0/+
MTND4P33	THAP9	0.110379	0.024707	-0.3873	0.101368	-1.97996	0.047708	#ERROR!
MRTFB	THAP9	0.629074	0	0.850877	3.89e-06	1.97993	0.047712	#ERROR!
LOC100129344	THAP9	0.110139	0.025023	-0.3873	0.101368	-1.97903	0.047812	#ERROR!
RANBP3	THAP9	0.463396	0	0.770175	0.000115	1.97875	0.047844	#ERROR!
KRT18P52	THAP9	0.247094	3.55e-07	0.647762	0.00271	1.9787	0.04785	#ERROR!
LINC02482	THAP9	0.237929	9.73e-07	0.642073	0.003037	1.97869	0.04785	#ERROR!
LDB2	THAP9	0.161803	0.000953	0.592982	0.007453	1.97831	0.047893	#ERROR!
LOC102725254	THAP9	0.269535	2.53e-08	-0.23799	0.326516	-1.97828	0.047897	#ERROR!
CDC14A	THAP9	0.580365	0	0.82807	1.2e-05	1.97807	0.047921	#ERROR!
NR2F1-AS1	THAP9	-0.00626	0.898894	0.47193	0.041347	1.97754	0.04798	0/+
HMG20A	THAP9	0.554808	0	0.815789	2.07e-05	1.97748	0.047987	#ERROR!
PLOD1	THAP9	0.063882	0.194561	0.524561	0.021123	1.97689	0.048054	0/+
SCGB2B2	THAP9	0.419185	0	0.746593	0.000241	1.97638	0.048111	#ERROR!
CARD16	THAP9	-0.11092	0.024012	0.385965	0.102651	1.97605	0.048149	-/0
MS4A2	THAP9	0.00347	0.943876	0.479158	0.037921	1.97604	0.04815	0/+
CCDC3	THAP9	0.066518	0.176744	0.526316	0.020619	1.97604	0.048151	0/+
FAM138E	THAP9	-0.06058	0.218715	0.428194	0.0674	1.97571	0.048188	0/0
CHRNA7	THAP9	0.201756	3.54e-05	0.618692	0.004743	1.97566	0.048193	#ERROR!
CYTH4	THAP9	-0.17961	0.000239	0.324561	0.175186	1.97565	0.048194	-/0
RN7SL606P	THAP9	0.204497	2.76e-05	-0.30123	0.210111	-1.97556	0.048204	#ERROR!
MOXD2P	THAP9	0.02045	0.678229	-0.46035	0.047327	-1.97522	0.048243	0/-
PPP1R10P1	THAP9	0.108668	0.02704	-0.3873	0.101368	-1.97336	0.048455	#ERROR!
PRPF38AP2	THAP9	0.188002	0.000119	-0.31622	0.187181	-1.97334	0.048457	#ERROR!
MTND4LP13	THAP9	0.203818	2.93e-05	-0.30123	0.210111	-1.97286	0.048511	#ERROR!
N6AMT1	THAP9	0.562938	0	0.819298	1.78e-05	1.97275	0.048525	#ERROR!
PHYHIPL	THAP9	0.163896	0.000816	0.593314	0.007412	1.97206	0.048602	#ERROR!
SDAD1-AS1	THAP9	0.188626	0.000113	-0.3151	0.18884	-1.97105	0.048719	#ERROR!
RPL3P13	THAP9	0.219208	6.74e-06	-0.28601	0.235215	-1.97076	0.048751	#ERROR!
RHEX	THAP9	0.109778	0.025506	0.55614	0.013411	1.97065	0.048764	#ERROR!
LOC101927822	THAP9	0.06489	0.187601	0.5241	0.021257	1.97061	0.048769	0/+
IFITM1	THAP9	-0.1304	0.007895	0.367705	0.121424	1.97029	0.048805	-/0
RN7SL26P	THAP9	0.156651	0.001386	-0.34427	0.148936	-1.97015	0.048821	#ERROR!
SGPP1	THAP9	0.156163	0.001435	0.587719	0.008139	1.96957	0.048887	#ERROR!
MIR4771-2	THAP9	0.241872	6.34e-07	-0.26352	0.275668	-1.9693	0.048918	#ERROR!
NCKAP5L	THAP9	0.313376	6.94e-11	0.686266	0.001176	1.96902	0.048951	#ERROR!
CCR2	THAP9	-0.07762	0.1148	0.412643	0.079127	1.96899	0.048954	0/0
KNDC1	THAP9	-0.0324	0.510847	0.449517	0.053496	1.96877	0.04898	0/0
ACOX2	THAP9	-0.05079	0.302519	0.434592	0.062973	1.96827	0.049037	0/0
GPR34	THAP9	-0.04802	0.329695	0.436842	0.061469	1.96827	0.049037	0/0
FGF14	THAP9	0.039112	0.427365	0.504607	0.027571	1.9681	0.049057	0/+
ARMH4	THAP9	0.143563	0.003418	0.578947	0.009396	1.96802	0.049065	#ERROR!
M1AP	THAP9	-0.02259	0.646695	0.457144	0.049092	1.96793	0.049077	0/+
COL10A1	THAP9	-0.0946	0.05443	0.398066	0.091426	1.96772	0.049101	0/0
PIK3R4	THAP9	0.623409	0	0.847368	4.68e-06	1.96752	0.049124	#ERROR!
ANKFY1	THAP9	0.493084	0	0.784211	7.06e-05	1.96715	0.049166	#ERROR!
LINC01471	THAP9	0.106929	0.029605	-0.3873	0.101368	-1.96665	0.049224	#ERROR!
SGCG	THAP9	0.067079	0.173113	0.524792	0.021056	1.96586	0.049315	0/+
DBF4B	THAP9	0.469454	0	0.77193	0.000108	1.96574	0.049329	#ERROR!
EPSTI1	THAP9	0.012803	0.795068	0.484211	0.035659	1.96554	0.049352	0/+
PSG8-AS1	THAP9	0.191612	8.73e-05	-0.31098	0.194997	-1.96546	0.049361	#ERROR!
DKK3	THAP9	-0.01648	0.738121	0.461404	0.046756	1.9652	0.049391	0/+
CYB5R3	THAP9	0.183876	0.000168	0.605263	0.006034	1.96461	0.04946	#ERROR!
LINC01350	THAP9	0.106394	0.030434	-0.3873	0.101368	-1.96459	0.049462	#ERROR!
PDE6A	THAP9	0.258891	9.14e-08	-0.24528	0.311482	-1.96414	0.049514	#ERROR!
RNASEL	THAP9	0.493769	0	0.784211	7.06e-05	1.96369	0.049565	#ERROR!
CCDC90B	THAP9	0.476741	0	0.775439	9.6e-05	1.96327	0.049615	#ERROR!
LINC00298	THAP9	0.20046	3.99e-05	0.615812	0.004998	1.96308	0.049637	#ERROR!
RPS4XP19	THAP9	0.22415	4.11e-06	0.630956	0.003771	1.96294	0.049654	#ERROR!
LOC284344	THAP9	0.105931	0.031168	-0.3873	0.101368	-1.9628	0.049669	#ERROR!
JDP2	THAP9	0.084576	0.085662	0.536842	0.01779	1.96274	0.049677	0/+
CYMP	THAP9	-0.02009	0.683647	-0.4892	0.033531	-1.96268	0.049684	0/-
LOC100419318	THAP9	0.149303	0.002321	-0.34915	0.142878	-1.96263	0.049689	#ERROR!
MIR6499	THAP9	0.074883	0.128218	0.529823	0.01964	1.96253	0.049701	0/+
MIR377	THAP9	0.105717	0.031512	-0.3873	0.101368	-1.96198	0.049765	#ERROR!
CYP1B1	THAP9	-0.02007	0.683953	0.457895	0.048674	1.96191	0.049773	0/+
CHRD	THAP9	-0.04194	0.394681	0.440351	0.059178	1.9616	0.049809	0/0
RPL37P7	THAP9	0.105522	0.031829	-0.3873	0.101368	-1.96123	0.049852	#ERROR!
CYP4V2	THAP9	0.360417	3.82e-14	0.712281	0.000623	1.96084	0.049897	#ERROR!
MTND4P21	THAP9	0.087659	0.074808	-0.4023	0.087716	-1.96026	0.049966	0/0
AASDH	THAP9	0.647576	0	0.857895	2.65e-06	1.95997	0.05	#ERROR!
LOC100421558	THAP9	0.105116	0.032497	-0.3873	0.101368	-1.95966	0.050035	#ERROR!
RPS2P32	THAP9	0.09722	0.04806	0.545215	0.015769	1.95927	0.050082	#ERROR!
NPHS1	THAP9	0.068858	0.161969	-0.41772	0.075141	-1.95881	0.050135	0/0
DCAKD	THAP9	0.53686	0	0.805263	3.19e-05	1.95794	0.050237	#ERROR!
LOC100420803	THAP9	0.329904	5.74e-12	0.694387	0.000971	1.95789	0.050243	#ERROR!
ADAMTS12	THAP9	-0.07305	0.137844	0.414035	0.078019	1.95787	0.050245	0/0
MTND5P6	THAP9	0.104634	0.033304	-0.3873	0.101368	-1.95781	0.050253	#ERROR!
LGALS3BP	THAP9	0.146195	0.002867	0.578947	0.009396	1.95777	0.050257	#ERROR!
RPL35AP26	THAP9	0.221507	5.36e-06	-0.28064	0.244509	-1.95771	0.050264	#ERROR!
RGS17	THAP9	0.252291	1.97e-07	0.647653	0.002716	1.95685	0.050365	#ERROR!
LOC101929773	THAP9	0.187155	0.000128	-0.31311	0.191797	-1.95683	0.050368	#ERROR!
IGSF23	THAP9	0.088117	0.073296	0.538271	0.017432	1.9568	0.050371	0/+
MYPN	THAP9	0.101349	0.039281	-0.38988	0.098919	-1.95673	0.050379	#ERROR!
RPS14P10	THAP9	0.070543	0.151921	0.525479	0.020858	1.95621	0.05044	0/+
PRAMEF19	THAP9	0.080968	0.099934	-0.40705	0.083695	-1.95618	0.050443	0/0
MIR4525	THAP9	0.153041	0.001791	-0.34427	0.148936	-1.95605	0.050459	#ERROR!
IGLV3-32	THAP9	-0.08114	0.099198	0.406608	0.084061	1.95486	0.0506	0/0
C1R	THAP9	-0.20033	4.03e-05	0.3	0.212074	1.95385	0.050718	-/0
MAGEA10-MAGEA5	THAP9	0.245182	4.4e-07	0.642763	0.002996	1.95381	0.050724	#ERROR!
SMCR8	THAP9	0.422443	0	0.745614	0.000248	1.95287	0.050835	#ERROR!
CADM3	THAP9	-0.09873	0.044681	0.391228	0.097653	1.95271	0.050854	-/0
LINC02826	THAP9	-0.0025	0.959591	0.469668	0.042466	1.95211	0.050925	0/+
HNRNPA3P7	THAP9	0.277884	8.89e-09	-0.22287	0.359066	-1.95182	0.050959	#ERROR!
PMS2P4	THAP9	0.496459	0	0.784366	7.03e-05	1.95165	0.050979	#ERROR!
RN7SKP153	THAP9	0.102991	0.03619	-0.3873	0.101368	-1.95147	0.051001	#ERROR!
MIR4484	THAP9	0.079607	0.105784	-0.40705	0.083695	-1.95096	0.051061	0/0
RN7SL509P	THAP9	0.102833	0.036477	-0.3873	0.101368	-1.95087	0.051073	#ERROR!
OR5D15P	THAP9	0.102797	0.036544	-0.3873	0.101368	-1.95073	0.05109	#ERROR!
MIR4690	THAP9	0.081419	0.098051	0.532291	0.018973	1.95056	0.051109	0/+
FBXL20	THAP9	0.64905	0	0.857895	2.65e-06	1.95027	0.051144	#ERROR!
JAK1	THAP9	0.32931	6.29e-12	0.692982	0.001004	1.95011	0.051163	#ERROR!
GJA10	THAP9	0.102602	0.036902	-0.3873	0.101368	-1.94998	0.051179	#ERROR!
ASB15-AS1	THAP9	0.15138	0.002011	-0.34427	0.148936	-1.94957	0.051227	#ERROR!
IGHV2-26	THAP9	-0.09549	0.052189	0.393105	0.095914	1.94872	0.051329	0/0
SENP1	THAP9	0.549475	0	0.810526	2.58e-05	1.9475	0.051475	#ERROR!
LRP5	THAP9	0.36348	2.24e-14	0.712281	0.000623	1.94741	0.051486	#ERROR!
BPIFA4P	THAP9	0.101819	0.038374	-0.3873	0.101368	-1.94696	0.051539	#ERROR!
LINC02443	THAP9	0.21927	6.7e-06	0.625276	0.004198	1.94674	0.051566	#ERROR!
NXPE2	THAP9	0.186723	0.000133	0.604082	0.00616	1.94627	0.051622	#ERROR!
OLFM4	THAP9	-0.05297	0.282239	0.42807	0.067488	1.94605	0.051649	0/0
CAPN7	THAP9	0.615708	0	0.842105	6.13e-06	1.94511	0.051762	#ERROR!
LARS2	THAP9	0.40491	0	0.735088	0.000336	1.94471	0.05181	#ERROR!
LINC00667	THAP9	0.263377	5.36e-08	0.652632	0.002454	1.94446	0.05184	#ERROR!
GVINP1	THAP9	0.062837	0.201974	0.517544	0.023238	1.94417	0.051875	0/+
HPN-AS1	THAP9	0.160196	0.001072	-0.33498	0.160941	-1.94401	0.051895	#ERROR!
ASB18	THAP9	0.101037	0.039895	-0.3873	0.101368	-1.94395	0.051902	#ERROR!
RNA5SP179	THAP9	0.077709	0.114393	-0.40705	0.083695	-1.94368	0.051934	0/0
PRMT5	THAP9	0.309999	1.13e-10	0.680702	0.001337	1.94348	0.051959	#ERROR!
CNRIP1	THAP9	-0.07349	0.135495	0.410526	0.080832	1.94343	0.051964	0/0
LINC02582	THAP9	0.035483	0.471516	0.496915	0.030432	1.94281	0.052039	0/+
FER1L6-AS1	THAP9	0.100731	0.040503	-0.3873	0.101368	-1.94277	0.052044	#ERROR!
IL36B	THAP9	0.107278	0.029073	-0.38164	0.106899	-1.94267	0.052056	#ERROR!
GPD1L	THAP9	0.373875	3.55e-15	0.717544	0.000543	1.94259	0.052066	#ERROR!
OR51E2	THAP9	0.025116	0.610353	0.488792	0.033699	1.94147	0.052201	0/+
LOC100128906	THAP9	0.09105	0.064193	-0.39528	0.093923	-1.94147	0.052201	0/0
RN7SL523P	THAP9	0.100088	0.041806	-0.3873	0.101368	-1.9403	0.052344	#ERROR!
RNF130	THAP9	0.15331	0.001757	0.580702	0.009133	1.94011	0.052367	#ERROR!
ARGFX	THAP9	0.099933	0.042126	-0.3873	0.101368	-1.9397	0.052417	#ERROR!
BTN3A2	THAP9	0.117813	0.016474	0.55614	0.013411	1.93962	0.052426	#ERROR!
PCDHA2	THAP9	0.233264	1.6e-06	0.633002	0.003626	1.93926	0.052469	#ERROR!
RNU6-1105P	THAP9	0.099789	0.042423	-0.3873	0.101368	-1.93914	0.052484	#ERROR!
CHRNB1	THAP9	0.331923	4.19e-12	0.692982	0.001004	1.93893	0.05251	#ERROR!
NRP1	THAP9	0.069022	0.160971	0.521053	0.022161	1.93881	0.052525	0/+
DMXL2	THAP9	0.598191	0	0.833333	9.4e-06	1.93869	0.052539	#ERROR!
OR2BH1P	THAP9	0.099546	0.042931	-0.3873	0.101368	-1.93821	0.052598	#ERROR!
ACTE1P	THAP9	0.150277	0.00217	-0.34258	0.151068	-1.93799	0.052625	#ERROR!
CTSLP2	THAP9	0.287969	2.39e-09	0.666653	0.001826	1.93763	0.052668	#ERROR!
PIK3R6	THAP9	-0.07277	0.139365	0.409829	0.0814	1.93749	0.052686	0/0
MTCO3P16	THAP9	0.099324	0.043402	-0.3873	0.101368	-1.93735	0.052702	#ERROR!
C9orf135	THAP9	0.110553	0.024479	0.550559	0.014577	1.93699	0.052746	#ERROR!
RNU5E-4P	THAP9	0.194717	6.66e-05	-0.30123	0.210111	-1.93674	0.052777	#ERROR!
IRF8	THAP9	-0.11486	0.019405	0.373684	0.115028	1.93657	0.052798	-/0
H2BC16P	THAP9	0.120285	0.014328	-0.36893	0.120091	-1.93654	0.052802	#ERROR!
RPL7AP58	THAP9	0.247111	3.54e-07	-0.25027	0.301409	-1.93647	0.052811	#ERROR!
BPIFA3	THAP9	0.099049	0.043987	-0.3873	0.101368	-1.93629	0.052832	#ERROR!
IGHD1-1	THAP9	0.030439	0.536829	-0.44426	0.056701	-1.93623	0.052839	0/0
FLT3LG	THAP9	0.047762	0.332334	0.504829	0.027492	1.9362	0.052843	0/+
GSPT2	THAP9	0.220956	5.67e-06	0.624561	0.004255	1.93551	0.052927	#ERROR!
DGKK	THAP9	0.284154	3.96e-09	-0.21226	0.382978	-1.93531	0.052952	#ERROR!
MATN2	THAP9	0.234767	1.37e-06	0.633333	0.003603	1.93531	0.052953	#ERROR!
RBBP4P3	THAP9	0.276643	1.04e-08	0.659402	0.002132	1.93522	0.052963	#ERROR!
MTCYBP29	THAP9	0.098712	0.044715	-0.3873	0.101368	-1.935	0.052991	#ERROR!
ANKRD18DP	THAP9	0.166058	0.000693	-0.32743	0.171176	-1.93465	0.053033	#ERROR!
LOC100129457	THAP9	0.098619	0.044918	-0.3873	0.101368	-1.93464	0.053035	#ERROR!
RNU1-38P	THAP9	0.066807	0.174869	0.518545	0.022926	1.93419	0.05309	0/+
LOC105369779	THAP9	0.436237	0	0.750877	0.000212	1.934	0.053114	#ERROR!
NLGN1-AS1	THAP9	0.088879	0.070836	-0.39528	0.093923	-1.93313	0.05322	0/0
LOC100418885	THAP9	0.098177	0.045891	-0.3873	0.101368	-1.93294	0.053244	#ERROR!
PTPRK	THAP9	0.336387	2.07e-12	0.694737	0.000963	1.93267	0.053277	#ERROR!
RNA5SP206	THAP9	-0.03674	0.455934	0.438357	0.060472	1.93233	0.053319	0/0
RN7SL159P	THAP9	0.097981	0.046328	-0.3873	0.101368	-1.93218	0.053337	#ERROR!
SCRN1	THAP9	0.224616	3.92e-06	0.626316	0.004117	1.93182	0.053382	#ERROR!
LOC100127900	THAP9	0.097875	0.046568	-0.3873	0.101368	-1.93177	0.053387	#ERROR!
ACP4	THAP9	0.27851	8.21e-09	-0.21721	0.37172	-1.93172	0.053394	#ERROR!
INHBE	THAP9	-0.000171	0.997237	0.467282	0.043672	1.93159	0.05341	0/+
ASB13	THAP9	0.298181	6.01e-10	0.67193	0.001627	1.93149	0.053423	#ERROR!
FAM227A	THAP9	0.509441	0	0.788921	5.96e-05	1.93096	0.053488	#ERROR!
FAM81A	THAP9	0.275879	1.15e-08	0.658183	0.002187	1.93017	0.053586	#ERROR!
RN7SL278P	THAP9	0.097335	0.047795	-0.3873	0.101368	-1.9297	0.053644	#ERROR!
DEFA9P	THAP9	0.097171	0.048174	-0.3873	0.101368	-1.92906	0.053723	#ERROR!
MESTP3	THAP9	0.146046	0.002896	-0.34427	0.148936	-1.92878	0.053758	#ERROR!
RN7SL314P	THAP9	0.09703	0.0485	-0.3873	0.101368	-1.92852	0.05379	#ERROR!
AGPS	THAP9	0.328707	6.91e-12	0.689474	0.001091	1.92708	0.05397	#ERROR!
LINC01558	THAP9	0.061646	0.210676	0.513264	0.024607	1.92651	0.05404	0/+
CPA3	THAP9	-0.13604	0.005563	0.352632	0.138663	1.92616	0.054085	-/0
CDH11	THAP9	-0.05416	0.27156	0.422807	0.071305	1.9261	0.054092	0/0
MIR4449	THAP9	0.145336	0.003037	-0.34427	0.148936	-1.92601	0.054103	#ERROR!
ACRBP	THAP9	0.334489	2.8e-12	0.692713	0.001011	1.92595	0.05411	#ERROR!
ARL17A	THAP9	0.581476	0	0.824254	1.43e-05	1.92586	0.054122	#ERROR!
GBP1	THAP9	-0.01276	0.795705	0.45614	0.049655	1.92561	0.054153	0/+
LINC01182	THAP9	0.096248	0.050351	-0.3873	0.101368	-1.92551	0.054165	0/0
PDSS2	THAP9	0.464392	0	0.764912	0.000136	1.92509	0.054218	#ERROR!
DPYSL4	THAP9	-0.02364	0.631507	0.447368	0.054789	1.92508	0.05422	0/0
HSPA1L	THAP9	0.425252	0	0.74386	0.000261	1.92481	0.054253	#ERROR!
DET1	THAP9	0.536712	0	0.802106	3.61e-05	1.92475	0.05426	#ERROR!
HID1-AS1	THAP9	0.216084	9.17e-06	0.619664	0.004659	1.92456	0.054284	#ERROR!
HOXB-AS3	THAP9	0.322642	1.75e-11	0.685529	0.001197	1.92443	0.054301	#ERROR!
MC3R	THAP9	0.095927	0.051126	-0.3873	0.101368	-1.92428	0.05432	0/0
OR7E90P	THAP9	0.191315	8.96e-05	-0.30123	0.210111	-1.92327	0.054446	#ERROR!
LINC01981	THAP9	0.24984	2.6e-07	-0.24426	0.313549	-1.92315	0.054462	#ERROR!
CHPF	THAP9	-0.08278	0.092559	0.398246	0.091267	1.92309	0.054469	0/0
MIR3158-1	THAP9	0.191263	9e-05	-0.30123	0.210111	-1.92306	0.054472	#ERROR!
RPSAP20	THAP9	0.164712	0.000767	0.585438	0.008452	1.92287	0.054496	#ERROR!
CHST10	THAP9	0.165493	0.000724	0.585965	0.008379	1.92287	0.054497	#ERROR!
MCHR2-AS1	THAP9	0.191179	9.07e-05	-0.30123	0.210111	-1.92273	0.054514	#ERROR!
RNU6-653P	THAP9	0.139245	0.004533	-0.34883	0.143271	-1.92208	0.054595	#ERROR!
ATP8A1	THAP9	0.213444	1.18e-05	0.617544	0.004843	1.92202	0.054603	#ERROR!
LRRC29	THAP9	0.219052	6.85e-06	0.621053	0.004541	1.92129	0.054695	#ERROR!
RN7SKP204	THAP9	0.144029	0.003314	-0.34427	0.148936	-1.92093	0.054741	#ERROR!
LIFR	THAP9	0.255139	1.42e-07	0.64386	0.002931	1.92045	0.054801	#ERROR!
CYB5D2	THAP9	0.366533	1.31e-14	0.710526	0.000651	1.92044	0.054802	#ERROR!
ACE3P	THAP9	0.094865	0.053764	-0.3873	0.101368	-1.92019	0.054833	0/0
OR5BJ1P	THAP9	0.094797	0.053936	-0.3873	0.101368	-1.91994	0.054866	0/0
C15orf65	THAP9	0.25606	1.27e-07	0.644344	0.002903	1.91985	0.054876	#ERROR!
RNA5SP309	THAP9	-0.03342	0.49768	0.438357	0.060472	1.91966	0.054901	0/0
DEFB125	THAP9	0.094706	0.054169	-0.3873	0.101368	-1.91958	0.054911	0/0
PON2	THAP9	0.28097	5.98e-09	0.659649	0.002121	1.91901	0.054984	#ERROR!
AGBL1	THAP9	0.009197	0.851991	-0.45758	0.048848	-1.91897	0.054988	0/-
PPIL3	THAP9	0.3948	0	0.726316	0.000429	1.91883	0.055005	#ERROR!
MTND6P4	THAP9	0.285083	3.5e-09	0.661984	0.002018	1.91777	0.055141	#ERROR!
GNG3	THAP9	0.43363	0	0.747587	0.000234	1.91766	0.055154	#ERROR!
LIPJ	THAP9	0.225324	3.65e-06	0.624487	0.00426	1.91753	0.055171	#ERROR!
LAP3	THAP9	0.057942	0.239449	0.508772	0.026112	1.91751	0.055173	0/+
PRKAG1	THAP9	0.482607	0	0.773684	0.000102	1.91751	0.055173	#ERROR!
PRSS42P	THAP9	0.267907	3.09e-08	-0.22453	0.355422	-1.91736	0.055192	#ERROR!
LINC01144	THAP9	0.414085	0	0.736842	0.00032	1.91728	0.055203	#ERROR!
RNF121	THAP9	0.349187	2.58e-13	0.7	0.000848	1.91644	0.055309	#ERROR!
LETMD1	THAP9	0.506524	0	0.785965	6.63e-05	1.91629	0.055328	#ERROR!
ASPH	THAP9	0.281728	5.43e-09	0.659649	0.002121	1.91587	0.055382	#ERROR!
LRRC37A2	THAP9	0.565923	0	0.815789	2.07e-05	1.91572	0.055401	#ERROR!
NGF	THAP9	-0.04288	0.38417	0.429825	0.066251	1.91569	0.055404	0/0
PPP1R26P1	THAP9	0.150224	0.002178	0.574219	0.010136	1.91507	0.055483	#ERROR!
LHFPL6	THAP9	0.035238	0.47458	0.491228	0.032692	1.91507	0.055483	0/+
LINC01425	THAP9	0.093529	0.057244	-0.3873	0.101368	-1.91506	0.055485	0/0
CRYBB1	THAP9	-0.10886	0.026767	0.374012	0.114684	1.91488	0.055507	-/0
ACP2	THAP9	0.134483	0.006134	0.563158	0.012052	1.914	0.055621	#ERROR!
IGHV3-65	THAP9	-0.02142	0.663814	0.446802	0.055134	1.91393	0.055629	0/0
ACVR2B-AS1	THAP9	0.485693	0	0.774901	9.77e-05	1.91373	0.055654	#ERROR!
LOC100507437	THAP9	0.43973	0	0.750441	0.000214	1.91371	0.055658	#ERROR!
KIF17	THAP9	0.008246	0.86716	0.470175	0.042213	1.91364	0.055666	0/+
MIR4755	THAP9	0.298123	6.06e-10	-0.19212	0.430726	-1.91343	0.055693	#ERROR!
S100A7A	THAP9	-0.02427	0.622372	-0.4825	0.036414	-1.91328	0.055712	0/-
RNU4-24P	THAP9	0.191821	8.58e-05	-0.29828	0.214837	-1.91291	0.05576	#ERROR!
FRG1-DT	THAP9	0.482822	0	0.773288	0.000103	1.91268	0.055789	#ERROR!
LOC390877	THAP9	0.200531	3.96e-05	-0.28988	0.22866	-1.91237	0.055829	#ERROR!
SLC17A2	THAP9	0.092489	0.060078	-0.3873	0.101368	-1.91106	0.055997	0/0
ALKBH8	THAP9	0.473989	0	0.768421	0.000121	1.91062	0.056053	#ERROR!
MIR409	THAP9	0.141256	0.003978	-0.34427	0.148936	-1.91014	0.056115	#ERROR!
CYLC2	THAP9	0.141205	0.003991	-0.34427	0.148936	-1.90994	0.056141	#ERROR!
LINC02701	THAP9	0.257718	1.05e-07	0.64386	0.002931	1.90993	0.056142	#ERROR!
CHRND	THAP9	0.091846	0.061891	-0.3873	0.101368	-1.90858	0.056316	0/0
PRDM5	THAP9	0.158838	0.001184	0.578947	0.009396	1.90843	0.056335	#ERROR!
MLH1	THAP9	0.412837	0	0.735088	0.000336	1.90843	0.056336	#ERROR!
ND6	THAP9	0.28639	2.95e-09	0.661404	0.002043	1.9084	0.056339	#ERROR!
FTH1P2	THAP9	0.139221	0.00454	0.565408	0.01164	1.90818	0.056368	#ERROR!
FBXW7	THAP9	0.664938	0	0.292233	0.224725	-1.90814	0.056373	#ERROR!
SLC2A1-AS1	THAP9	0.146497	0.002809	0.570426	0.010763	1.9081	0.056379	#ERROR!
ARNT	THAP9	0.5602	0	0.812281	2.39e-05	1.90801	0.05639	#ERROR!
B2M	THAP9	-0.00129	0.979121	0.461404	0.046756	1.90729	0.056483	0/+
RN7SL810P	THAP9	0.140498	0.004179	-0.34427	0.148936	-1.90719	0.056496	#ERROR!
SERPINI1	THAP9	0.284326	3.87e-09	0.659939	0.002108	1.90706	0.056513	#ERROR!
MAML2	THAP9	0.422702	0	0.740351	0.000289	1.90689	0.056535	#ERROR!
LINC01998	THAP9	0.076414	0.120577	0.520314	0.022384	1.90662	0.05657	0/+
OR2T3	THAP9	0.022669	0.645585	-0.44426	0.056701	-1.90659	0.056573	0/0
KRTAP9-9	THAP9	0.091323	0.063394	-0.3873	0.101368	-1.90658	0.056575	0/0
IFT52	THAP9	0.438816	0	0.749123	0.000223	1.90655	0.056579	#ERROR!
GTPBP4	THAP9	0.385842	4.44e-16	-0.09298	0.704979	-1.90643	0.056595	#ERROR!
LOC101928837	THAP9	0.09886	0.044393	0.536569	0.01786	1.90637	0.056603	#ERROR!
KPNA4	THAP9	0.462201	0	0	1	-1.90623	0.05662	#ERROR!
COL5A2	THAP9	-0.09064	0.0654	0.387719	0.100965	1.90585	0.05667	0/0
DROSHA	THAP9	0.498415	0	0.780702	8e-05	1.90572	0.056687	#ERROR!
RBM46	THAP9	0.102523	0.037048	-0.37743	0.111146	-1.90561	0.0567	#ERROR!
RNU6-710P	THAP9	0.090943	0.064506	-0.3873	0.101368	-1.90512	0.056765	0/0
OR2A2	THAP9	0.160251	0.001068	-0.32579	0.173461	-1.9049	0.056793	#ERROR!
LINC02530	THAP9	0.090833	0.064832	-0.3873	0.101368	-1.90469	0.05682	0/0
RAB3GAP2	THAP9	0.535318	0	0.799474	4e-05	1.90424	0.056879	#ERROR!
INPPL1	THAP9	0.485297	0	0.773684	0.000102	1.90412	0.056895	#ERROR!
CFAP300	THAP9	0.253815	1.65e-07	0.640351	0.003142	1.90309	0.057029	#ERROR!
MIR606	THAP9	0.139435	0.004477	-0.34427	0.148936	-1.90306	0.057033	#ERROR!
CTBS	THAP9	0.392115	0	0.722807	0.000472	1.90278	0.057069	#ERROR!
MIR6071	THAP9	0.208451	1.91e-05	0.611146	0.005437	1.90277	0.057071	#ERROR!
FBXO42	THAP9	0.593368	0	0.82807	1.2e-05	1.90246	0.057111	#ERROR!
RNU6-33P	THAP9	0.18051	0.000222	-0.30641	0.201988	-1.90237	0.057123	#ERROR!
C10orf120	THAP9	0.090178	0.066797	-0.3873	0.101368	-1.90217	0.057148	0/0
MEP1A	THAP9	0.145305	0.003043	0.568413	0.011108	1.90139	0.057251	#ERROR!
LINC01498	THAP9	0.147946	0.002546	-0.33602	0.15956	-1.90066	0.057346	#ERROR!
NFILZ	THAP9	0.08978	0.068012	-0.3873	0.101368	-1.90065	0.057348	0/0
RN7SKP290	THAP9	0.089742	0.068132	-0.3873	0.101368	-1.9005	0.057368	0/0
CX3CL1	THAP9	0.046067	0.349797	0.496491	0.030596	1.90026	0.057399	0/+
MGAT5B	THAP9	0.061918	0.208665	0.508341	0.02626	1.90008	0.057422	0/+
OTOR	THAP9	0.08963	0.068478	-0.3873	0.101368	-1.90007	0.057424	0/0
OR52E8	THAP9	-0.08958	0.068622	0.387298	0.101368	1.89989	0.057448	0/0
PLEKHD1	THAP9	0.370314	6.66e-15	-0.10916	0.656443	-1.89965	0.057479	#ERROR!
RPL7P28	THAP9	0.37034	6.66e-15	0.709926	0.000661	1.89904	0.05756	#ERROR!
OR8L1P	THAP9	0.089359	0.069321	-0.3873	0.101368	-1.89903	0.057561	0/0
COLGALT2	THAP9	0.182009	0.000197	0.592982	0.007453	1.89895	0.057572	#ERROR!
MCU	THAP9	0.356317	7.73e-14	0.701754	0.000812	1.89854	0.057625	#ERROR!
LCE1E	THAP9	0.077325	0.116199	0.519372	0.022672	1.8982	0.057669	0/+
MBL1P	THAP9	0.172556	0.000421	0.58648	0.008308	1.89814	0.057677	#ERROR!
MTND1P5	THAP9	0.172238	0.000431	-0.31311	0.191797	-1.89807	0.057687	#ERROR!
GPR107	THAP9	0.443856	0	0.750877	0.000212	1.89798	0.057699	#ERROR!
ARHGAP31	THAP9	0.119007	0.015404	0.549364	0.014837	1.89781	0.057721	#ERROR!
ATP10D	THAP9	0.211691	1.4e-05	0.612281	0.005327	1.89676	0.05786	#ERROR!
GAS6	THAP9	-0.15374	0.001704	0.329825	0.167887	1.89669	0.057869	-/0
RNY4P10	THAP9	0.47544	0	0.019531	0.936746	-1.89646	0.057899	#ERROR!
MIR569	THAP9	0.13773	0.004996	-0.34427	0.148936	-1.89643	0.057903	#ERROR!
FMN2	THAP9	0.162922	0.000877	0.579597	0.009298	1.89619	0.057936	#ERROR!
HIGD1AP6	THAP9	0.184442	0.000161	-0.30123	0.210111	-1.89611	0.057945	#ERROR!
LOC100420119	THAP9	0.088384	0.072426	-0.3873	0.101368	-1.89528	0.058055	0/0
AGBL4	THAP9	0.291444	1.51e-09	0.662567	0.001993	1.89528	0.058056	#ERROR!
LOC100419073	THAP9	0.300964	4.09e-10	-0.18447	0.449646	-1.89509	0.058081	#ERROR!
KRTAP19-8	THAP9	0.117017	0.017222	0.54744	0.015263	1.89501	0.058091	#ERROR!
GOLGA8EP	THAP9	0.088311	0.072662	-0.3873	0.101368	-1.895	0.058092	0/0
EPDR1	THAP9	0.026745	0.587379	0.480702	0.037218	1.89495	0.058099	0/+
INCA1	THAP9	0.531931	0	0.796841	4.43e-05	1.89463	0.058141	#ERROR!
OSCAR	THAP9	-0.18881	0.000111	0.296752	0.217307	1.8946	0.058146	-/0
RNY3P4	THAP9	0.088178	0.073097	-0.3873	0.101368	-1.89449	0.05816	0/0
LINC01811	THAP9	0.134552	0.006108	-0.34661	0.146004	-1.89424	0.058193	#ERROR!
RN7SKP158	THAP9	0.098361	0.045484	-0.37845	0.11011	-1.8941	0.058211	#ERROR!
MKRN7P	THAP9	0.07304	0.137906	0.51537	0.023926	1.8938	0.058251	0/+
MTM1	THAP9	0.457722	0	0.757895	0.00017	1.89373	0.058262	#ERROR!
ALB	THAP9	0.245579	4.21e-07	0.633617	0.003583	1.89338	0.058307	#ERROR!
SELPLG	THAP9	-0.1869	0.000131	0.298246	0.21489	1.89331	0.058317	-/0
ABL2	THAP9	0.303996	2.67e-10	-0.1807	0.459109	-1.89296	0.058363	#ERROR!
AMY1B	THAP9	0.096691	0.049294	0.532291	0.018973	1.89189	0.058506	#ERROR!
APOBEC3H	THAP9	0.028384	0.564681	0.481336	0.036933	1.89184	0.058513	0/+
PPP2R2B	THAP9	0.173447	0.000392	0.585965	0.008379	1.89165	0.058538	#ERROR!
OTUD6A	THAP9	0.064078	0.19319	-0.40705	0.083695	-1.89147	0.058562	0/0
C11orf71	THAP9	0.426075	0	0.740351	0.000289	1.89121	0.058597	#ERROR!
ANKRD33	THAP9	0.150727	0.002104	-0.33126	0.165936	-1.89106	0.058616	#ERROR!
OAZ2	THAP9	0.379353	1.33e-15	0.714035	0.000595	1.89083	0.058647	#ERROR!
PSG11	THAP9	0.087195	0.076367	-0.3873	0.101368	-1.89071	0.058663	0/0
RPL17P31	THAP9	0.09139	0.063199	0.528178	0.020094	1.89046	0.058696	0/+
M6PR	THAP9	0.394877	0	0.722807	0.000472	1.89033	0.058714	#ERROR!
RPL32P1	THAP9	0.021807	0.658182	0.475949	0.039414	1.89029	0.05872	0/+
LINC00581	THAP9	0.135928	0.005601	-0.34442	0.148737	-1.89012	0.058742	#ERROR!
C1QA	THAP9	-0.26459	4.63e-08	0.221053	0.36311	1.88981	0.058783	-/0
H6PD	THAP9	0.349376	2.5e-13	0.696491	0.000923	1.88952	0.058822	#ERROR!
RSBN1	THAP9	0.639602	0	0.849123	4.27e-06	1.88868	0.058935	#ERROR!
BMS1P10	THAP9	0.159505	0.001128	0.575944	0.009861	1.88865	0.058939	#ERROR!
PLEKHA2	THAP9	0.265724	4.03e-08	0.645614	0.00283	1.88861	0.058943	#ERROR!
RNU2-32P	THAP9	0.135697	0.005684	-0.34427	0.148936	-1.88853	0.058954	#ERROR!
LOC101928386	THAP9	0.265597	4.1e-08	0.645487	0.002837	1.8883	0.058985	#ERROR!
LINC02655	THAP9	0.086558	0.078548	-0.3873	0.101368	-1.88827	0.05899	0/0
DSTNP3	THAP9	0.350484	2.07e-13	0.696968	0.000913	1.88824	0.058994	#ERROR!
LRRK1	THAP9	0.232751	1.69e-06	0.624561	0.004255	1.88812	0.05901	#ERROR!
LOC100507283	THAP9	0.576891	0	0.81878	1.82e-05	1.88797	0.05903	#ERROR!
MIR4422	THAP9	0.086444	0.078945	-0.3873	0.101368	-1.88783	0.059049	0/0
MRE11	THAP9	0.603849	0	0.831944	1e-05	1.88767	0.059071	#ERROR!
KLF8	THAP9	0.358842	5.02e-14	0.701754	0.000812	1.8875	0.059092	#ERROR!
FBN3	THAP9	0.1671	0.000641	-0.31526	0.188603	-1.88699	0.059162	#ERROR!
OR2J2	THAP9	0.086216	0.079742	-0.3873	0.101368	-1.88695	0.059167	0/0
LAPTM4A	THAP9	0.329229	6.37e-12	0.684211	0.001234	1.88687	0.059178	#ERROR!
IGHVII-22-1	THAP9	0.086095	0.080164	-0.3873	0.101368	-1.88649	0.059229	0/0
BNIP3P29	THAP9	0.171572	0.000454	0.58375	0.00869	1.88619	0.05927	#ERROR!
MED23	THAP9	0.651188	0	0.854386	3.22e-06	1.88607	0.059285	#ERROR!
NDRG2	THAP9	0.335311	2.46e-12	0.687719	0.001137	1.88607	0.059286	#ERROR!
OR51B5	THAP9	0.166753	0.000658	0.580384	0.00918	1.88569	0.059337	#ERROR!
ARL9	THAP9	0.055199	0.262463	0.500439	0.029094	1.88539	0.059378	0/+
MIR4730	THAP9	0.250748	2.35e-07	-0.23355	0.335896	-1.88354	0.059627	#ERROR!
CRTC1	THAP9	0.40571	0	0.72807	0.000409	1.88351	0.059632	#ERROR!
RNU6-402P	THAP9	0.205643	2.48e-05	0.606103	0.005945	1.88342	0.059643	#ERROR!
MAPK11	THAP9	-0.1288	0.0087	0.349123	0.142909	1.88281	0.059726	-/0
RGS1	THAP9	-0.15388	0.001688	0.326316	0.172729	1.88225	0.059802	-/0
BFAR	THAP9	0.434405	0	0.74386	0.000261	1.88201	0.059834	#ERROR!
BEND6	THAP9	0.079104	0.108014	0.517544	0.023238	1.88185	0.059856	0/+
LRIG3	THAP9	0.256277	1.24e-07	0.638596	0.003253	1.88174	0.059871	#ERROR!
LINC00857	THAP9	0.088709	0.071378	0.524561	0.021123	1.8817	0.059877	0/+
ANKRD60	THAP9	0.084825	0.084741	-0.3873	0.101368	-1.88161	0.059889	0/0
NAP1L2	THAP9	0.237158	1.06e-06	0.626316	0.004117	1.88132	0.059928	#ERROR!
PLA2G4C-AS1	THAP9	-0.07455	0.129932	0.395979	0.093295	1.88128	0.059934	0/0
MIR4516	THAP9	0.133589	0.006486	-0.34442	0.148737	-1.88103	0.059967	#ERROR!
RAB11FIP5	THAP9	0.130527	0.007833	0.554386	0.013769	1.88073	0.060008	#ERROR!
CLRN2	THAP9	0.084547	0.08577	-0.3873	0.101368	-1.88055	0.060034	0/0
CSF1R	THAP9	-0.16675	0.000658	0.314035	0.19042	1.88043	0.06005	-/0
OLFM2	THAP9	0.094203	0.055465	0.528302	0.02006	1.8803	0.060067	0/+
APOBEC3C	THAP9	0.262189	6.18e-08	0.642105	0.003035	1.88026	0.060073	#ERROR!
OR7D4	THAP9	0.133408	0.00656	-0.34427	0.148936	-1.87965	0.060156	#ERROR!
C16orf96	THAP9	0.173866	0.000379	0.584147	0.008634	1.87947	0.060181	#ERROR!
SGO1P1	THAP9	0.084262	0.086835	-0.3873	0.101368	-1.87945	0.060183	0/0
RNU1-24P	THAP9	0.084074	0.087542	-0.3873	0.101368	-1.87873	0.060281	0/0
PRLH	THAP9	0.113797	0.020561	0.542115	0.016495	1.87859	0.0603	#ERROR!
SLC9B1P1	THAP9	0.084022	0.087738	-0.3873	0.101368	-1.87853	0.060308	0/0
LTBP4	THAP9	0.033393	0.49804	0.482456	0.036432	1.87829	0.060341	0/+
LINC01964	THAP9	0.133038	0.006712	-0.34422	0.148989	-1.87803	0.060377	#ERROR!
MILR1	THAP9	-0.13538	0.005797	0.342105	0.151672	1.87799	0.060383	-/0
OR5M5P	THAP9	0.167047	0.000643	0.579236	0.009352	1.87794	0.060389	#ERROR!
C3orf84	THAP9	0.132951	0.006748	-0.34427	0.148936	-1.87787	0.060398	#ERROR!
GPR173	THAP9	0.222244	4.98e-06	0.61606	0.004976	1.87768	0.060425	#ERROR!
IFI35	THAP9	-0.03057	0.535132	0.431579	0.06503	1.8769	0.060531	0/0
RN7SL236P	THAP9	0.259727	8.28e-08	-0.22279	0.359264	-1.87687	0.060536	#ERROR!
IGHVIII-38-1	THAP9	-0.02214	0.653339	0.438357	0.060472	1.87662	0.06057	0/0
SLC6A18	THAP9	0.083511	0.089691	-0.3873	0.101368	-1.87657	0.060577	0/0
GTF3C3	THAP9	0.524417	0	0.791228	5.47e-05	1.87646	0.060592	#ERROR!
GOLGA8R	THAP9	0.38746	4.44e-16	0.716733	0.000555	1.87566	0.060701	#ERROR!
RN7SL795P	THAP9	0.083236	0.090756	-0.3873	0.101368	-1.87552	0.060722	0/0
LOC339803	THAP9	-0.03296	0.503629	0.429324	0.066602	1.87549	0.060726	0/0
RN7SL563P	THAP9	0.179205	0.000247	-0.30123	0.210111	-1.87547	0.060728	#ERROR!
IL15RA	THAP9	-0.12096	0.013786	0.354386	0.136573	1.87536	0.060743	-/0
EEF1A1P34	THAP9	0.121955	0.013021	0.5473	0.015295	1.87516	0.060771	#ERROR!
PLBD2	THAP9	0.297233	6.85e-10	0.663158	0.001968	1.87514	0.060774	#ERROR!
FCHSD2	THAP9	0.355814	8.44e-14	0.698246	0.000885	1.87451	0.06086	#ERROR!
LOC100133077	THAP9	0.096335	0.05014	-0.37573	0.112891	-1.87426	0.060894	0/0
CTDSP2	THAP9	0.303399	2.9e-10	0.666667	0.001825	1.87328	0.06103	#ERROR!
DAB2	THAP9	0.147483	0.002628	0.564912	0.01173	1.87325	0.061034	#ERROR!
[truncated: 21,922 more rows]

## Sheet: BRCA
Gene1	Gene2	TCGA_BRCA.PrimarySolidTumor_cor	TCGA_BRCA.PrimarySolidTumor_pVal	TCGA_BRCA.SolidTissueNormal_cor	TCGA_BRCA.SolidTissueNormal_pVal	zScoreDiff	pValDiff	Classes
MCTP2	THAP9	0.073428	0.014766	0.826211	0	10.7082	9.32e-27	#ERROR!
PM20D2	THAP9	0.25904	0	0.874798	0	10.568	4.2e-26	#ERROR!
PPP2R3A	THAP9	0.335542	0	0.890732	0	10.4545	1.4e-25	#ERROR!
RADX	THAP9	0.250695	0	0.859226	0	10.0449	9.68e-24	#ERROR!
PLCB1	THAP9	0.255406	0	0.857473	0	9.93129	3.04e-23	#ERROR!
N4BP2L2	THAP9	0.489559	0	0.912006	0	9.74976	1.85e-22	#ERROR!
EPM2AIP1	THAP9	0.612252	0	0.937129	0	9.72626	2.33e-22	#ERROR!
MAML2	THAP9	0.243835	2.22e-16	0.847946	0	9.71196	2.68e-22	#ERROR!
TP63	THAP9	0.055916	0.063519	0.776497	0	9.52318	1.68e-21	0/+
NR3C2	THAP9	0.333435	0	0.86841	0	9.51711	1.78e-21	#ERROR!
IL1RAP	THAP9	0.273924	0	0.849091	0	9.43842	3.78e-21	#ERROR!
SLC2A12	THAP9	0.140805	2.7e-06	0.804631	0	9.41975	4.52e-21	#ERROR!
L3MBTL4	THAP9	0.118564	7.97e-05	0.794471	0	9.36585	7.54e-21	#ERROR!
TSPYL5	THAP9	0.157097	1.59e-07	0.807284	0	9.33145	1.04e-20	#ERROR!
NFIB	THAP9	0.225471	3.62e-14	0.830246	0	9.31925	1.17e-20	#ERROR!
BACH2	THAP9	0.173482	6.77e-09	0.811452	0	9.28521	1.61e-20	#ERROR!
SH3RF2	THAP9	0.052056	0.084115	0.762308	0	9.22294	2.89e-20	0/+
LRIG3	THAP9	0.195684	5.67e-11	0.814351	0	9.14496	5.97e-20	#ERROR!
INTS6L	THAP9	0.193291	9.77e-11	0.812054	0	9.10328	8.76e-20	#ERROR!
CDIN1	THAP9	0.426984	0	0.883878	0	9.10079	8.97e-20	#ERROR!
SOX9-AS1	THAP9	0.081746	0.006625	0.768702	0	9.08327	1.05e-19	#ERROR!
SLAIN1	THAP9	0.125407	2.98e-05	0.784557	0	9.04272	1.53e-19	#ERROR!
TDRP	THAP9	0.229446	1.24e-14	0.822471	0	9.04038	1.56e-19	#ERROR!
CHML	THAP9	0.482155	0	0.896907	0	9.03631	1.62e-19	#ERROR!
KY	THAP9	0.079813	0.008032	0.76535	0	9.02308	1.83e-19	#ERROR!
LIN9	THAP9	0.507042	0	0.90261	0	9.00724	2.11e-19	#ERROR!
RIC3	THAP9	0.088789	0.003178	0.765801	0	8.94586	3.69e-19	#ERROR!
LOC101929295	THAP9	0.190846	1.69e-10	0.804882	0	8.9268	4.39e-19	#ERROR!
DENND2C	THAP9	0.264229	0	0.830313	0	8.92083	4.63e-19	#ERROR!
CNOT7	THAP9	0.522981	0	0.903273	0	8.83137	1.03e-18	#ERROR!
FAM126A	THAP9	0.246908	0	0.821097	0	8.81948	1.15e-18	#ERROR!
LRAT	THAP9	0.147359	8.97e-07	0.783887	0	8.80857	1.27e-18	#ERROR!
TMEM65	THAP9	0.434483	0	0.878801	0	8.79042	1.49e-18	#ERROR!
SLC25A12	THAP9	0.448686	0	0.882741	0	8.78972	1.5e-18	#ERROR!
TIGD7	THAP9	0.479013	0	0.89076	0	8.779	1.65e-18	#ERROR!
MCPH1	THAP9	0.501441	0	0.89661	0	8.77453	1.72e-18	#ERROR!
PARP8	THAP9	0.231531	7.11e-15	0.812967	0	8.74036	2.32e-18	#ERROR!
SOCS6	THAP9	0.560724	0	0.910498	0	8.70764	3.1e-18	#ERROR!
PRKAA2	THAP9	0.294308	0	0.833221	0	8.69559	3.45e-18	#ERROR!
MID1	THAP9	0.092386	0.002141	0.756137	0	8.68763	3.7e-18	#ERROR!
GAS1RR	THAP9	0.132044	1.09e-05	0.772442	0	8.67841	4.01e-18	#ERROR!
ESYT3	THAP9	0.124126	3.6e-05	0.768446	0	8.66111	4.67e-18	#ERROR!
KRR1	THAP9	0.711787	0	0.944737	0	8.64011	5.62e-18	#ERROR!
BEND7	THAP9	0.264212	0	0.820122	0	8.61068	7.26e-18	#ERROR!
PTPN14	THAP9	0.312444	0	0.835565	0	8.57654	9.78e-18	#ERROR!
PRKCQ-AS1	THAP9	0.022636	0.452852	0.717928	0	8.55392	1.19e-17	0/+
FLRT3	THAP9	0.060372	0.045103	0.73548	0	8.54808	1.25e-17	#ERROR!
LRRN1	THAP9	0.188946	2.58e-10	0.788908	0	8.52063	1.59e-17	#ERROR!
CNTNAP3	THAP9	0.098664	0.00104	0.751125	0	8.51341	1.69e-17	#ERROR!
PSTPIP2	THAP9	0.322648	0	0.835598	0	8.46736	2.51e-17	#ERROR!
PIK3C2G	THAP9	0.106819	0.000382	0.751763	0	8.44759	2.97e-17	#ERROR!
LPCAT2	THAP9	0.276499	0	0.818033	0	8.42027	3.76e-17	#ERROR!
GALNT3	THAP9	0.183469	8.48e-10	0.782469	0	8.4123	4.02e-17	#ERROR!
ITGB6	THAP9	0.077829	0.009748	0.736864	0	8.40707	4.2e-17	#ERROR!
FERMT1	THAP9	0.049703	0.099129	0.723664	0	8.40663	4.22e-17	0/+
NAALADL2	THAP9	0.281713	0	0.819359	0	8.4044	4.3e-17	#ERROR!
ESRRG	THAP9	0.236551	1.78e-15	0.802069	0	8.38445	5.1e-17	#ERROR!
COG3	THAP9	0.523729	0	0.894502	0	8.37743	5.41e-17	#ERROR!
TLE4	THAP9	0.168847	1.71e-08	0.774604	0	8.36492	6.02e-17	#ERROR!
PIP5K1B	THAP9	0.107346	0.000357	0.747056	0	8.33812	7.55e-17	#ERROR!
HECTD2	THAP9	0.498629	0	0.886523	0	8.33297	7.88e-17	#ERROR!
TPTEP1	THAP9	0.139881	3.14e-06	0.759627	0	8.29956	1.04e-16	#ERROR!
REPS2	THAP9	0.357359	0	0.841079	0	8.26525	1.39e-16	#ERROR!
GPD2	THAP9	0.535763	0	0.894304	0	8.20536	2.3e-16	#ERROR!
SLFN13	THAP9	0.142403	2.07e-06	0.756504	0	8.20327	2.34e-16	#ERROR!
GALNT5	THAP9	0.103163	0.000604	0.738295	0	8.18945	2.62e-16	#ERROR!
PDLIM5	THAP9	0.483891	0	0.878647	0	8.17545	2.95e-16	#ERROR!
MIOS	THAP9	0.59024	0	0.90865	0	8.17489	2.96e-16	#ERROR!
SFRP1	THAP9	0.082226	0.006312	0.727668	0	8.17149	3.05e-16	#ERROR!
SUPT20H	THAP9	0.502262	0	0.883694	0	8.15899	3.38e-16	#ERROR!
TIAM2	THAP9	0.404948	0	0.853662	0	8.15793	3.41e-16	#ERROR!
DENND1B	THAP9	0.407467	0	0.85395	0	8.13897	3.99e-16	#ERROR!
TUT4	THAP9	0.420776	0	0.857841	0	8.12425	4.5e-16	#ERROR!
B3GALT1	THAP9	0.141329	2.48e-06	0.75195	0	8.11133	5.01e-16	#ERROR!
TMEM123	THAP9	0.347992	0	0.832978	0	8.10631	5.22e-16	#ERROR!
MIPOL1	THAP9	0.430051	0	0.860004	0	8.09437	5.76e-16	#ERROR!
ITGA6	THAP9	0.300237	0	0.815067	0	8.08234	6.35e-16	#ERROR!
PLCZ1	THAP9	0.127965	2.04e-05	0.744408	0	8.07711	6.63e-16	#ERROR!
NPAS3	THAP9	0.237899	1.33e-15	0.790952	0	8.07517	6.74e-16	#ERROR!
JRKL	THAP9	0.318084	0	0.821217	0	8.07134	6.95e-16	#ERROR!
COL4A3	THAP9	0.103752	0.000561	0.732804	0	8.06746	7.18e-16	#ERROR!
SATB1	THAP9	0.247833	0	0.794225	0	8.05813	7.75e-16	#ERROR!
SH3TC2	THAP9	0.15755	1.46e-07	0.756675	0	8.05664	7.84e-16	#ERROR!
PTBP2	THAP9	0.543493	0	0.893372	0	8.0544	7.99e-16	#ERROR!
BHLHE41	THAP9	0.163632	4.69e-08	0.759078	0	8.05085	8.22e-16	#ERROR!
LINC00472	THAP9	0.254868	0	0.796383	0	8.04224	8.82e-16	#ERROR!
HDX	THAP9	0.36287	0	0.835778	0	8.03042	9.71e-16	#ERROR!
TNIK	THAP9	0.128218	1.96e-05	0.741807	0	8.01821	1.07e-15	#ERROR!
MLLT3	THAP9	0.404718	0	0.848687	0	7.98521	1.4e-15	#ERROR!
EPC1	THAP9	0.706871	0	0.935756	0	7.9825	1.43e-15	#ERROR!
KCNC4	THAP9	0.150344	5.34e-07	0.750142	0	7.98159	1.44e-15	#ERROR!
SPTLC3	THAP9	0.253173	0	0.793381	0	7.98064	1.46e-15	#ERROR!
PDSS1	THAP9	0.319447	0	0.818619	0	7.9796	1.47e-15	#ERROR!
TEX10	THAP9	0.57665	0	0.901006	0	7.96528	1.65e-15	#ERROR!
PDE4B	THAP9	0.155963	1.96e-07	0.751906	0	7.96499	1.65e-15	#ERROR!
PRKCQ	THAP9	0.078489	0.009144	0.715212	0	7.9557	1.78e-15	#ERROR!
DNAI4	THAP9	0.290175	0	0.806818	0	7.95536	1.79e-15	#ERROR!
DYRK1A	THAP9	0.72315	0	0.939387	0	7.95052	1.86e-15	#ERROR!
THUMPD2	THAP9	0.515096	0	0.882491	0	7.93774	2.06e-15	#ERROR!
EML6	THAP9	0.292117	0	0.806323	0	7.921	2.36e-15	#ERROR!
NUFIP1	THAP9	0.522505	0	0.884287	0	7.91872	2.4e-15	#ERROR!
RAVER2	THAP9	0.485688	0	0.872806	0	7.90922	2.59e-15	#ERROR!
FGFR2	THAP9	0.277369	0	0.8	0	7.90383	2.7e-15	#ERROR!
PLPPR1	THAP9	0.049559	0.100107	0.697471	0	7.89388	2.93e-15	0/+
LINC01060	THAP9	0.045013	0.135354	0.694034	0	7.87344	3.45e-15	0/+
RPS6KA5	THAP9	0.494944	0	0.874669	0	7.86737	3.62e-15	#ERROR!
EFCAB1	THAP9	0.004672	0.876897	0.671288	4.44e-16	7.85168	4.11e-15	0/+
TRMT9B	THAP9	0.158685	1.19e-07	0.747702	0	7.84461	4.34e-15	#ERROR!
PAK3	THAP9	0.175274	4.71e-09	0.754841	0	7.83805	4.58e-15	#ERROR!
PAK5	THAP9	0.12011	6.41e-05	0.729318	0	7.83385	4.73e-15	#ERROR!
RCOR3	THAP9	0.515363	0	0.880029	0	7.82719	4.99e-15	#ERROR!
SNRNP48	THAP9	0.682877	0	0.927378	0	7.81696	5.41e-15	#ERROR!
MYH3	THAP9	0.092271	0.002169	0.714585	0	7.8084	5.79e-15	#ERROR!
PCM1	THAP9	0.453378	0	0.859506	0	7.79432	6.48e-15	#ERROR!
MCF2L2	THAP9	0.092634	0.002082	0.713894	0	7.79113	6.64e-15	#ERROR!
NT5C2	THAP9	0.520129	0	0.880447	0	7.78199	7.14e-15	#ERROR!
ANKRA2	THAP9	0.517579	0	0.879649	0	7.78151	7.17e-15	#ERROR!
TMEM161B-AS1	THAP9	0.323931	0	0.813405	0	7.77946	7.28e-15	#ERROR!
CNTN1	THAP9	0.130101	1.47e-05	0.730933	0	7.76885	7.92e-15	#ERROR!
GPR156	THAP9	0.124873	3.23e-05	0.727873	0	7.75695	8.7e-15	#ERROR!
LOC440173	THAP9	0.078468	0.009163	0.704773	0	7.75143	9.09e-15	#ERROR!
DSC2	THAP9	0.285925	0	0.797546	0	7.74774	9.35e-15	#ERROR!
CYP39A1	THAP9	0.142663	1.99e-06	0.735795	0	7.7467	9.43e-15	#ERROR!
ANKRD6	THAP9	0.321046	0	0.810192	0	7.71923	1.17e-14	#ERROR!
LRRIQ1	THAP9	0.213833	7.31e-13	0.765469	0	7.6933	1.43e-14	#ERROR!
KCNQ5	THAP9	0.149178	6.54e-07	0.736222	0	7.69111	1.46e-14	#ERROR!
NUP58	THAP9	0.621726	0	0.908394	0	7.67718	1.63e-14	#ERROR!
TPP2	THAP9	0.55163	0	0.887582	0	7.66984	1.72e-14	#ERROR!
MTMR8	THAP9	0.216423	3.8e-13	0.765573	0	7.66936	1.73e-14	#ERROR!
KLF5	THAP9	0.176768	3.46e-09	0.747568	0	7.66095	1.85e-14	#ERROR!
MEIS2	THAP9	0.108584	0.000305	0.714808	0	7.65277	1.97e-14	#ERROR!
PTPN20	THAP9	0.206698	4.24e-12	0.760336	0	7.64653	2.06e-14	#ERROR!
SPEF2	THAP9	0.406508	0	0.839047	0	7.63909	2.19e-14	#ERROR!
MTRF1	THAP9	0.476117	0	0.862576	0	7.62788	2.39e-14	#ERROR!
SSBP2	THAP9	0.386494	0	0.831357	0	7.62275	2.48e-14	#ERROR!
SCN8A	THAP9	0.213044	8.9e-13	0.761869	0	7.61744	2.59e-14	#ERROR!
SP4	THAP9	0.64337	0	0.913222	0	7.60187	2.92e-14	#ERROR!
FLJ22447	THAP9	0.098147	0.001105	0.706347	0	7.58922	3.22e-14	#ERROR!
MAP10	THAP9	0.390175	0	0.831615	0	7.58877	3.23e-14	#ERROR!
MOB3B	THAP9	0.225	4.09e-14	0.765852	0	7.58836	3.24e-14	#ERROR!
SEMA3E	THAP9	0.109495	0.000271	0.71187	0	7.58572	3.31e-14	#ERROR!
MAP3K21	THAP9	0.293701	0	0.794541	0	7.58559	3.31e-14	#ERROR!
RUNX2	THAP9	0.134851	7.06e-06	0.724237	0	7.5837	3.36e-14	#ERROR!
CMYA5	THAP9	0.328159	0	0.808011	0	7.58066	3.44e-14	#ERROR!
FAM83B	THAP9	0.25817	0	0.779705	0	7.58029	3.45e-14	#ERROR!
GTF2IRD2B	THAP9	0.41219	0	0.839001	0	7.57127	3.7e-14	#ERROR!
GPRASP2	THAP9	0.38336	0	0.828489	0	7.56897	3.76e-14	#ERROR!
LOC100505501	THAP9	0.04057	0.178365	0.674972	2.22e-16	7.56821	3.78e-14	0/+
PDE4DIPP6	THAP9	0.216089	4.13e-13	0.76082	0	7.5622	3.96e-14	#ERROR!
BTBD3	THAP9	0.590125	0	0.896934	0	7.56071	4.01e-14	#ERROR!
IKZF2	THAP9	0.337683	0	0.810934	0	7.55897	4.06e-14	#ERROR!
ADAMTS9-AS2	THAP9	0.13636	5.55e-06	0.723032	0	7.54421	4.55e-14	#ERROR!
PELI2	THAP9	0.224723	4.4e-14	0.763694	0	7.5407	4.67e-14	#ERROR!
PDE1C	THAP9	0.177793	2.8e-09	0.741936	0	7.52782	5.16e-14	#ERROR!
TRIM2	THAP9	0.377771	0	0.825073	0	7.52759	5.17e-14	#ERROR!
SAMD5	THAP9	0.114513	0.000139	0.711042	0	7.52008	5.47e-14	#ERROR!
CCSER1	THAP9	0.374916	0	0.823732	0	7.51926	5.51e-14	#ERROR!
SPATA6	THAP9	0.465173	0	0.855916	0	7.51722	5.6e-14	#ERROR!
ENDOD1	THAP9	0.358549	0	0.817338	0	7.51282	5.79e-14	#ERROR!
GPAM	THAP9	0.446377	0	-0.2847	0.002241	-7.50729	6.04e-14	#ERROR!
LOC105374171	THAP9	-0.05208	0.083948	0.617379	3.27e-13	7.50667	6.07e-14	0/+
NUDT11	THAP9	0.121396	5.34e-05	0.713579	0	7.5023	6.27e-14	#ERROR!
RNF128	THAP9	0.195836	5.48e-11	0.748702	0	7.49411	6.68e-14	#ERROR!
KDM6A	THAP9	0.590444	0	0.89561	0	7.49057	6.86e-14	#ERROR!
RWDD3	THAP9	0.530123	0	0.876343	0	7.47342	7.81e-14	#ERROR!
CNNM1	THAP9	0.019424	0.519495	0.657772	2.44e-15	7.47325	7.82e-14	0/+
ANK3	THAP9	0.433348	0	0.84351	0	7.47087	7.97e-14	#ERROR!
CCDC122	THAP9	0.368512	0	0.819503	0	7.46502	8.33e-14	#ERROR!
KCNH8	THAP9	0.126384	2.58e-05	0.714145	0	7.46431	8.37e-14	#ERROR!
MYLK4	THAP9	0.341779	0	0.808678	0	7.45034	9.31e-14	#ERROR!
DPY19L2P2	THAP9	0.32626	0	0.802216	0	7.44132	9.97e-14	#ERROR!
BHLHB9	THAP9	0.508754	0	0.868471	0	7.43757	1.03e-13	#ERROR!
RYR3	THAP9	0.251258	0	0.77074	0	7.43384	1.05e-13	#ERROR!
AP4S1	THAP9	0.396876	0	0.828797	0	7.42368	1.14e-13	#ERROR!
PTPRK	THAP9	0.356908	0	0.813197	0	7.41118	1.25e-13	#ERROR!
NAA16	THAP9	0.572297	0	0.888307	0	7.40972	1.27e-13	#ERROR!
FBXO32	THAP9	0.227384	2.18e-14	0.759058	0	7.40632	1.3e-13	#ERROR!
CFAP43	THAP9	0.253842	0	0.77063	0	7.40441	1.32e-13	#ERROR!
SPATA18	THAP9	0.221191	1.11e-13	0.756162	0	7.40364	1.33e-13	#ERROR!
NALCN	THAP9	0.161508	7.01e-08	0.727934	0	7.39491	1.42e-13	#ERROR!
GDAP1	THAP9	0.343289	0	0.806879	0	7.38345	1.54e-13	#ERROR!
PRNP	THAP9	0.209174	2.32e-12	0.749734	0	7.38185	1.56e-13	#ERROR!
SETDB2	THAP9	0.551719	0	0.881046	0	7.3773	1.62e-13	#ERROR!
NEK5	THAP9	0.198242	3.15e-11	0.744287	0	7.37293	1.67e-13	#ERROR!
OTUD7A	THAP9	0.225399	3.69e-14	0.756328	0	7.36439	1.78e-13	#ERROR!
KCNJ2-AS1	THAP9	0.128596	1.85e-05	0.709971	0	7.36023	1.84e-13	#ERROR!
FRMD6	THAP9	0.325113	0	0.79869	0	7.35845	1.86e-13	#ERROR!
GNG12-AS1	THAP9	0.22688	2.49e-14	0.756665	0	7.35689	1.88e-13	#ERROR!
TSHZ2	THAP9	0.156102	1.91e-07	0.723318	0	7.35408	1.92e-13	#ERROR!
GUCY1A1	THAP9	0.247723	0	0.765732	0	7.35177	1.96e-13	#ERROR!
CRPPA	THAP9	0.390497	0	0.823744	0	7.34232	2.1e-13	#ERROR!
NUDT12	THAP9	0.501496	0	0.863519	0	7.33985	2.14e-13	#ERROR!
ANKRD10	THAP9	0.343818	0	0.805191	0	7.33082	2.29e-13	#ERROR!
GRAMD2B	THAP9	0.293176	0	0.784024	0	7.32021	2.48e-13	#ERROR!
LOC105370854	THAP9	0.115881	0.000116	0.701161	0	7.31521	2.57e-13	#ERROR!
FAT2	THAP9	0.055459	0.065715	0.668595	4.44e-16	7.31039	2.66e-13	0/+
LZTFL1	THAP9	0.506306	0	0.864178	0	7.30247	2.83e-13	#ERROR!
PPM1K	THAP9	0.31409	0	0.792038	0	7.30182	2.84e-13	#ERROR!
LINC01152	THAP9	0.15124	4.56e-07	0.718288	0	7.30077	2.86e-13	#ERROR!
LIFR-AS1	THAP9	0.316813	0	0.793077	0	7.2996	2.89e-13	#ERROR!
TOGARAM1	THAP9	0.569118	0	0.884799	0	7.29633	2.96e-13	#ERROR!
NAA25	THAP9	0.67818	0	0.918109	0	7.29516	2.98e-13	#ERROR!
HLA-F-AS1	THAP9	0.177062	3.26e-09	0.730392	0	7.29035	3.09e-13	#ERROR!
TEX9	THAP9	0.35672	0	0.808851	0	7.28991	3.1e-13	#ERROR!
IQCA1	THAP9	0.105687	0.000441	0.694525	0	7.28981	3.1e-13	#ERROR!
CIPC	THAP9	0.567325	0	0.883917	0	7.2827	3.27e-13	#ERROR!
LINC00506	THAP9	0.148486	7.38e-07	0.71591	0	7.28057	3.32e-13	#ERROR!
OSBPL3	THAP9	0.179017	2.17e-09	0.730774	0	7.27871	3.37e-13	#ERROR!
NRG4	THAP9	0.173445	6.83e-09	0.727702	0	7.27084	3.57e-13	#ERROR!
SETBP1	THAP9	0.351771	0	0.80604	0	7.26645	3.69e-13	#ERROR!
DPH6	THAP9	0.601296	0	0.894176	0	7.25718	3.95e-13	#ERROR!
FAM189A2	THAP9	0.15057	5.13e-07	0.715562	0	7.25293	4.08e-13	#ERROR!
RND3	THAP9	0.143635	1.69e-06	0.712077	0	7.25277	4.08e-13	#ERROR!
PRSS16	THAP9	0.156316	1.83e-07	0.71829	0	7.2503	4.16e-13	#ERROR!
STOX2	THAP9	0.279839	0	0.775135	0	7.24121	4.45e-13	#ERROR!
SOX9	THAP9	0.164316	4.12e-08	0.721792	0	7.24118	4.45e-13	#ERROR!
ARHGEF38	THAP9	0.180716	1.52e-09	0.729265	0	7.23028	4.82e-13	#ERROR!
SS18L1	THAP9	0.611183	0	0.896683	0	7.2282	4.89e-13	#ERROR!
NUDT10	THAP9	0.085231	0.004636	0.680196	0	7.22647	4.96e-13	#ERROR!
GIN1	THAP9	0.622173	0	0.899986	0	7.2222	5.12e-13	#ERROR!
MTF2	THAP9	0.585765	0	0.888458	0	7.21988	5.2e-13	#ERROR!
ID4	THAP9	0.107338	0.000358	0.691566	0	7.21828	5.27e-13	#ERROR!
CADM1	THAP9	0.298805	0	0.782226	0	7.21513	5.39e-13	#ERROR!
CFAP94	THAP9	0.292029	0	0.779311	0	7.21472	5.4e-13	#ERROR!
NIPAL2	THAP9	0.289487	0	0.777395	0	7.19447	6.27e-13	#ERROR!
GPRASP1	THAP9	0.219546	1.71e-13	0.745746	0	7.18841	6.55e-13	#ERROR!
PPIP5K1	THAP9	0.39751	0	0.821289	0	7.18795	6.58e-13	#ERROR!
OBSCN-AS1	THAP9	0.199159	2.54e-11	0.736094	0	7.18764	6.59e-13	#ERROR!
DEPTOR	THAP9	0.318598	0	0.789402	0	7.18486	6.73e-13	#ERROR!
LOC101929709	THAP9	0.400861	0	0.822449	0	7.18397	6.77e-13	#ERROR!
BCL11B	THAP9	0.027029	0.370042	0.64499	1.24e-14	7.1837	6.79e-13	0/+
GPR157	THAP9	0.313571	0	0.787241	0	7.18367	6.79e-13	#ERROR!
ACVR2A	THAP9	0.406063	0	0.82434	0	7.18064	6.94e-13	#ERROR!
FBXO34	THAP9	0.615121	0	0.896897	0	7.17755	7.1e-13	#ERROR!
CPEB3	THAP9	0.552976	0	0.876764	0	7.17697	7.13e-13	#ERROR!
ITGB8	THAP9	0.269159	0	0.767654	0	7.17394	7.29e-13	#ERROR!
SEMA5A	THAP9	0.303331	0	0.782473	0	7.17296	7.34e-13	#ERROR!
SDR42E1	THAP9	0.284097	0	0.774165	0	7.17273	7.35e-13	#ERROR!
LINC02097	THAP9	0.148187	7.77e-07	0.709886	0	7.16456	7.8e-13	#ERROR!
TBC1D4	THAP9	0.394721	0	0.819324	0	7.16176	7.97e-13	#ERROR!
MAP2K4	THAP9	0.501416	0	0.858693	0	7.15956	8.09e-13	#ERROR!
GPALPP1	THAP9	0.561752	0	0.879266	0	7.1594	8.1e-13	#ERROR!
RTTN	THAP9	0.561992	0	0.879219	0	7.15395	8.43e-13	#ERROR!
BTBD11	THAP9	0.102622	0.000645	0.68556	0	7.15367	8.45e-13	#ERROR!
TOX	THAP9	0.119899	6.6e-05	0.694453	0	7.14863	8.76e-13	#ERROR!
PKIA	THAP9	0.117542	9.19e-05	0.692753	0	7.14003	9.33e-13	#ERROR!
CATSPERE	THAP9	0.377704	0	0.811876	0	7.13992	9.34e-13	#ERROR!
LINC01918	THAP9	0.032617	0.279335	0.645292	1.2e-14	7.1344	9.72e-13	0/+
NTN4	THAP9	0.132839	9.67e-06	0.700158	0	7.12877	1.01e-12	#ERROR!
PTPRZ1	THAP9	0.083797	0.005378	0.673377	4.44e-16	7.11828	1.09e-12	#ERROR!
MRRF	THAP9	0.523708	0	0.865213	0	7.11224	1.14e-12	#ERROR!
NEDD1	THAP9	0.662278	0	0.910249	0	7.11062	1.16e-12	#ERROR!
CEACAM1	THAP9	0.19618	5.06e-11	0.730891	0	7.10836	1.17e-12	#ERROR!
CBR4	THAP9	0.573521	0	0.881728	0	7.09713	1.27e-12	#ERROR!
LINC01278	THAP9	0.448233	0	0.83758	0	7.09516	1.29e-12	#ERROR!
RPAP2	THAP9	0.660224	0	0.909315	0	7.09341	1.31e-12	#ERROR!
IQUB	THAP9	0.197045	4.15e-11	0.729901	0	7.07901	1.45e-12	#ERROR!
JPH1	THAP9	0.325231	0	0.787955	0	7.0758	1.49e-12	#ERROR!
ENAH	THAP9	0.37928	0	0.810136	0	7.07269	1.52e-12	#ERROR!
SPATA6L	THAP9	0.155062	2.3e-07	0.708476	0	7.06867	1.56e-12	#ERROR!
PGAP1	THAP9	0.478956	0	0.848102	0	7.068	1.57e-12	#ERROR!
STX19	THAP9	0.052682	0.080451	0.652896	4.66e-15	7.06677	1.59e-12	0/+
LY75	THAP9	0.214029	6.96e-13	0.737462	0	7.06583	1.6e-12	#ERROR!
LINC01265	THAP9	0.014916	0.620876	0.63055	7.19e-14	7.06496	1.61e-12	0/+
DSG2	THAP9	0.530039	0	0.866136	0	7.0629	1.63e-12	#ERROR!
C10orf90	THAP9	0.083152	0.005745	0.669648	4.44e-16	7.05863	1.68e-12	#ERROR!
MPP5	THAP9	0.560655	0	0.876501	0	7.05783	1.69e-12	#ERROR!
ST8SIA1	THAP9	0.083322	0.005646	0.669506	4.44e-16	7.05446	1.73e-12	#ERROR!
PINK1-AS	THAP9	0.424928	0	0.827447	0	7.05409	1.74e-12	#ERROR!
ARL4C	THAP9	0.092483	0.002118	0.674387	2.22e-16	7.05122	1.77e-12	#ERROR!
RFX7	THAP9	0.592963	0	0.887108	0	7.05084	1.78e-12	#ERROR!
MTAP	THAP9	0.522227	0	0.863095	0	7.05083	1.78e-12	#ERROR!
EDA2R	THAP9	0.294195	0	0.77354	0	7.05056	1.78e-12	#ERROR!
RPAP3	THAP9	0.685089	0	0.916138	0	7.04933	1.8e-12	#ERROR!
RFC3	THAP9	0.479927	0	0.847807	0	7.04554	1.85e-12	#ERROR!
EFCAB6	THAP9	0.324079	0	0.786182	0	7.04305	1.88e-12	#ERROR!
PRXL2A	THAP9	0.392321	0	-0.30064	0.001214	-7.03928	1.93e-12	#ERROR!
BCL11A	THAP9	0.011537	0.702034	0.62656	1.15e-13	7.03371	2.01e-12	0/+
ARSJ	THAP9	0.170364	1.27e-08	0.714368	0	7.03188	2.04e-12	#ERROR!
THNSL1	THAP9	0.508981	0	0.857895	0	7.03147	2.04e-12	#ERROR!
ORC4	THAP9	0.684403	0	0.915633	0	7.03143	2.04e-12	#ERROR!
DCDC1	THAP9	0.223061	6.84e-14	0.739777	0	7.0232	2.17e-12	#ERROR!
RNF144B	THAP9	0.338327	0	0.791406	0	7.02191	2.19e-12	#ERROR!
MSI2	THAP9	0.529219	0	0.864784	0	7.02167	2.19e-12	#ERROR!
DBF4	THAP9	0.457324	0	0.838721	0	7.02134	2.2e-12	#ERROR!
TAF4B	THAP9	0.38737	0	0.811553	0	7.02075	2.21e-12	#ERROR!
PPP3CB-AS1	THAP9	0.452367	0	0.836824	0	7.02027	2.21e-12	#ERROR!
GPM6B	THAP9	0.226086	3.06e-14	0.741006	0	7.01866	2.24e-12	#ERROR!
NLGN4X	THAP9	0.102448	0.000659	0.677897	0	7.01631	2.28e-12	#ERROR!
HOMER1	THAP9	0.39903	0	0.815997	0	7.01458	2.31e-12	#ERROR!
TRIM24	THAP9	0.601626	0	0.889089	0	7.01113	2.36e-12	#ERROR!
KIAA1217	THAP9	0.483757	0	0.848149	0	7.00894	2.4e-12	#ERROR!
MAP2	THAP9	0.285067	0	0.76761	0	7.00554	2.46e-12	#ERROR!
ODF2L	THAP9	0.404494	0	0.817675	0	7.00028	2.55e-12	#ERROR!
FAM111A	THAP9	0.461766	0	0.839604	0	6.99565	2.64e-12	#ERROR!
SOWAHC	THAP9	0.45881	0	0.838334	0	6.99041	2.74e-12	#ERROR!
CXADR	THAP9	0.226857	2.49e-14	0.739982	0	6.98876	2.77e-12	#ERROR!
GULP1	THAP9	0.208141	2.99e-12	0.73073	0	6.98388	2.87e-12	#ERROR!
ATP13A5	THAP9	-0.02991	0.32122	0.597382	2.86e-12	6.9831	2.89e-12	0/+
LRP4	THAP9	0.247499	0	0.74943	0	6.98234	2.9e-12	#ERROR!
SAMD13	THAP9	0.120107	6.41e-05	0.685429	0	6.97931	2.97e-12	#ERROR!
MAP2K6	THAP9	0.260855	0	0.755362	0	6.97646	3.03e-12	#ERROR!
GTF2F2	THAP9	0.341144	0	0.790482	0	6.96703	3.24e-12	#ERROR!
SLC25A27	THAP9	0.181508	1.29e-09	0.716575	0	6.9641	3.31e-12	#ERROR!
MAP3K1	THAP9	0.405569	0	0.816851	0	6.96367	3.32e-12	#ERROR!
OGFRL1	THAP9	0.456187	0	0.836484	0	6.96251	3.34e-12	#ERROR!
TAF1D	THAP9	0.343642	0	0.791367	0	6.96249	3.34e-12	#ERROR!
SLC5A1	THAP9	0.012532	0.677742	0.622674	1.79e-13	6.96217	3.35e-12	0/+
RETSAT	THAP9	0.308124	0	-0.3785	3.57e-05	-6.96163	3.36e-12	#ERROR!
TRMT13	THAP9	0.633482	0	0.898396	0	6.96024	3.4e-12	#ERROR!
KTN1-AS1	THAP9	0.372221	0	0.803203	0	6.95971	3.41e-12	#ERROR!
PDE7A	THAP9	0.357165	0	0.796951	0	6.95962	3.41e-12	#ERROR!
LOC283299	THAP9	0.083261	0.005681	0.664002	1.11e-15	6.95881	3.43e-12	#ERROR!
NAP1L2	THAP9	0.196094	5.17e-11	0.723346	0	6.95373	3.56e-12	#ERROR!
CTDSPL	THAP9	0.450584	0	0.834022	0	6.95191	3.6e-12	#ERROR!
PGAM1P5	THAP9	0.162485	5.83e-08	0.706163	0	6.94975	3.66e-12	#ERROR!
TTN-AS1	THAP9	0.395598	0	0.812231	0	6.9457	3.77e-12	#ERROR!
GATM	THAP9	0.282866	0	0.764071	0	6.94567	3.77e-12	#ERROR!
RARB	THAP9	0.244556	2.22e-16	0.746276	0	6.94326	3.83e-12	#ERROR!
SLC9A5	THAP9	0.064493	0.032296	0.652326	4.88e-15	6.94202	3.87e-12	#ERROR!
PELI1	THAP9	0.31202	0	0.776861	0	6.94074	3.9e-12	#ERROR!
TFE3	THAP9	0.405173	0	-0.27724	0.002951	-6.93965	3.93e-12	#ERROR!
TMEM200C	THAP9	0.05931	0.049023	0.649176	7.55e-15	6.93949	3.94e-12	#ERROR!
NEB	THAP9	0.320492	0	0.780435	0	6.93748	3.99e-12	#ERROR!
FIRRE	THAP9	0.177262	3.13e-09	0.712972	0	6.93516	4.06e-12	#ERROR!
PIH1D2	THAP9	0.294979	0	0.768943	0	6.93202	4.15e-12	#ERROR!
APBA1	THAP9	0.269113	0	0.757151	0	6.93078	4.19e-12	#ERROR!
IRX2	THAP9	0.101972	0.000699	0.672334	4.44e-16	6.9217	4.46e-12	#ERROR!
MTPAP	THAP9	0.645095	0	0.90133	0	6.91928	4.54e-12	#ERROR!
ABHD17B	THAP9	0.575306	0	0.87816	0	6.91769	4.59e-12	#ERROR!
TBX19	THAP9	0.219419	1.76e-13	0.733049	0	6.9176	4.59e-12	#ERROR!
EPHB1	THAP9	0.147926	8.13e-07	0.6965	0	6.90994	4.85e-12	#ERROR!
MFAP3L	THAP9	0.311942	0	0.775381	0	6.90543	5.01e-12	#ERROR!
CHST9	THAP9	0.167793	2.1e-08	0.706578	0	6.9048	5.03e-12	#ERROR!
NRDE2	THAP9	0.542416	0	0.866409	0	6.90478	5.03e-12	#ERROR!
CDC5L	THAP9	0.672462	0	0.909756	0	6.90444	5.04e-12	#ERROR!
PIBF1	THAP9	0.547101	0	0.867948	0	6.90037	5.19e-12	#ERROR!
GABRP	THAP9	0.077607	0.009959	0.657357	2.66e-15	6.89955	5.22e-12	#ERROR!
PSTK	THAP9	0.467941	0	0.838841	0	6.89407	5.42e-12	#ERROR!
NIBAN1	THAP9	0.274234	0	0.757893	0	6.894	5.42e-12	#ERROR!
GSPT2	THAP9	0.129961	1.51e-05	0.686039	0	6.89327	5.45e-12	#ERROR!
ITGA2	THAP9	0.318081	0	0.777491	0	6.89083	5.55e-12	#ERROR!
MIA2	THAP9	0.474395	0	0.841065	0	6.88687	5.7e-12	#ERROR!
SNHG1	THAP9	0.283875	0	0.761938	0	6.88542	5.76e-12	#ERROR!
TVP23C	THAP9	0.203338	9.51e-12	0.723518	0	6.88396	5.82e-12	#ERROR!
SRSF12	THAP9	0.120467	6.09e-05	0.680271	0	6.88189	5.91e-12	#ERROR!
ERBIN	THAP9	0.634574	0	0.89718	0	6.88163	5.92e-12	#ERROR!
IQCH-AS1	THAP9	0.626372	0	0.894426	0	6.87841	6.05e-12	#ERROR!
METTL25	THAP9	0.497467	0	0.849428	0	6.87799	6.07e-12	#ERROR!
LOC100289473	THAP9	0.118027	8.59e-05	0.678352	0	6.87131	6.36e-12	#ERROR!
CLDN8	THAP9	0.071106	0.018237	0.651516	5.55e-15	6.86381	6.7e-12	#ERROR!
LINC02728	THAP9	0.235841	2.22e-15	0.738133	0	6.85699	7.03e-12	#ERROR!
TMEM178B	THAP9	0.091188	0.002446	0.662187	1.33e-15	6.84977	7.4e-12	#ERROR!
COL17A1	THAP9	0.003852	0.898373	0.610022	7.39e-13	6.84831	7.47e-12	0/+
DOCK5	THAP9	0.338633	0	0.784672	0	6.84598	7.6e-12	#ERROR!
LINC00689	THAP9	0.092244	0.002175	0.662479	1.33e-15	6.84448	7.68e-12	#ERROR!
TADA1	THAP9	0.659848	0	0.904644	0	6.84409	7.7e-12	#ERROR!
CYP2E1	THAP9	0.056984	0.058616	0.642075	1.8e-14	6.84389	7.71e-12	0/+
PTCHD1	THAP9	0.069489	0.021057	0.649024	7.55e-15	6.83766	8.05e-12	#ERROR!
TPD52L1	THAP9	0.126089	2.7e-05	0.680885	0	6.83756	8.06e-12	#ERROR!
C16orf87	THAP9	0.489461	0	0.845249	0	6.83686	8.09e-12	#ERROR!
SCYL3	THAP9	0.558604	0	0.87039	0	6.83642	8.12e-12	#ERROR!
SERPINB5	THAP9	0.066667	0.026894	0.647188	9.55e-15	6.83446	8.23e-12	#ERROR!
PCNX2	THAP9	0.325638	0	0.778503	0	6.83386	8.27e-12	#ERROR!
TMEM237	THAP9	0.480763	0	0.841733	0	6.82894	8.55e-12	#ERROR!
DNAH11	THAP9	0.133433	8.82e-06	0.684344	0	6.82791	8.62e-12	#ERROR!
MICU2	THAP9	0.466095	0	0.836031	0	6.82564	8.75e-12	#ERROR!
PARD3	THAP9	0.429398	0	0.821581	0	6.82304	8.91e-12	#ERROR!
PROM1	THAP9	0.093251	0.001943	0.661711	1.33e-15	6.82133	9.02e-12	#ERROR!
GPATCH11	THAP9	0.634552	0	0.047062	0.620607	-6.81721	9.28e-12	#ERROR!
PRKX	THAP9	0.277506	0	0.755979	0	6.81607	9.36e-12	#ERROR!
PAN3	THAP9	0.621082	0	0.891327	0	6.81406	9.49e-12	#ERROR!
DST	THAP9	0.331777	0	0.780388	0	6.81365	9.52e-12	#ERROR!
SLC6A14	THAP9	0.04359	0.148153	0.63196	6.08e-14	6.80896	9.83e-12	0/+
MTO1	THAP9	0.604804	0	0.885721	0	6.80865	9.85e-12	#ERROR!
FIGNL1	THAP9	0.598868	0	0.88369	0	6.8083	9.88e-12	#ERROR!
DHDDS	THAP9	0.465727	0	-0.19387	0.039632	-6.80804	9.89e-12	#ERROR!
TC2N	THAP9	0.299019	0	0.765267	0	6.80223	1.03e-11	#ERROR!
CDK6	THAP9	0.153894	2.84e-07	0.693759	0	6.79912	1.05e-11	#ERROR!
CCSAP	THAP9	0.501528	0	0.848625	0	6.79747	1.06e-11	#ERROR!
ABCB1	THAP9	0.208644	2.64e-12	0.721761	0	6.79442	1.09e-11	#ERROR!
PCMTD2	THAP9	0.668265	0	0.906348	0	6.78976	1.12e-11	#ERROR!
SPRTN	THAP9	0.581192	0	0.877151	0	6.78918	1.13e-11	#ERROR!
LRRC37B	THAP9	0.52353	0	0.856537	0	6.78906	1.13e-11	#ERROR!
LRP12	THAP9	0.376675	0	0.798588	0	6.78438	1.17e-11	#ERROR!
HOXA3	THAP9	-0.01223	0.685163	0.595463	3.49e-12	6.78235	1.18e-11	0/+
CDKAL1	THAP9	0.603358	0	0.884524	0	6.77708	1.23e-11	#ERROR!
PSMG4	THAP9	0.174246	5.8e-09	0.703291	0	6.77677	1.23e-11	#ERROR!
ITPK1	THAP9	0.241577	4.44e-16	-0.42238	3.16e-06	-6.76993	1.29e-11	#ERROR!
FHOD3	THAP9	0.128216	1.96e-05	0.678214	0	6.76836	1.3e-11	#ERROR!
CENPJ	THAP9	0.459399	0	0.83163	0	6.76812	1.3e-11	#ERROR!
CSRNP3	THAP9	0.282748	0	0.756286	0	6.76778	1.31e-11	#ERROR!
IPCEF1	THAP9	0.179782	1.85e-09	0.705703	0	6.76778	1.31e-11	#ERROR!
HSPA14	THAP9	0.576568	0	0.874959	0	6.76516	1.33e-11	#ERROR!
NEXMIF	THAP9	0.34029	0	0.782051	0	6.76189	1.36e-11	#ERROR!
HSF2	THAP9	0.631903	0	0.893794	0	6.75892	1.39e-11	#ERROR!
POLR3D	THAP9	0.318765	0	0.772325	0	6.75786	1.4e-11	#ERROR!
GABRG3	THAP9	0.01061	0.724961	0.608238	8.98e-13	6.7551	1.43e-11	0/+
PRELID2	THAP9	0.369385	0	0.79437	0	6.75458	1.43e-11	#ERROR!
RAD1	THAP9	0.648641	0	0.899238	0	6.75284	1.45e-11	#ERROR!
PPP2R2A	THAP9	0.435165	0	0.821344	0	6.74709	1.51e-11	#ERROR!
COMMD2	THAP9	0.561415	0	0.869111	0	6.74566	1.52e-11	#ERROR!
RFESD	THAP9	0.392547	0	0.803779	0	6.74424	1.54e-11	#ERROR!
ARAP2	THAP9	0.346361	0	0.783897	0	6.7414	1.57e-11	#ERROR!
TIGD1	THAP9	0.430459	0	0.819241	0	6.74089	1.57e-11	#ERROR!
LOC442497	THAP9	0.090467	0.002648	0.655426	3.33e-15	6.74082	1.57e-11	#ERROR!
ANKRD23	THAP9	0.163798	4.54e-08	0.695908	0	6.74078	1.58e-11	#ERROR!
C3orf35	THAP9	0.183111	9.15e-10	0.706002	0	6.74014	1.58e-11	#ERROR!
SEC61A2	THAP9	0.506445	0	0.84864	0	6.73398	1.65e-11	#ERROR!
FOXP1	THAP9	0.372995	0	0.795059	0	6.73208	1.67e-11	#ERROR!
ATL1	THAP9	0.296331	0	0.760609	0	6.72263	1.78e-11	#ERROR!
TMEM108	THAP9	0.135814	6.06e-06	0.67983	0	6.72237	1.79e-11	#ERROR!
JAKMIP3	THAP9	0.230929	8.44e-15	0.729081	0	6.71706	1.85e-11	#ERROR!
ACYP1	THAP9	0.304768	0	0.76421	0	6.71607	1.87e-11	#ERROR!
MTBP	THAP9	0.536957	0	0.85946	0	6.71525	1.88e-11	#ERROR!
RAD51AP2	THAP9	0.054586	0.070086	0.632394	5.77e-14	6.70893	1.96e-11	0/+
COIL	THAP9	0.654307	0	0.90023	0	6.7078	1.98e-11	#ERROR!
FAM66C	THAP9	0.396611	0	0.803984	0	6.70311	2.04e-11	#ERROR!
PDS5B	THAP9	0.556223	0	0.86605	0	6.69878	2.1e-11	#ERROR!
ALKBH1	THAP9	0.476234	0	0.835996	0	6.69793	2.11e-11	#ERROR!
FZD7	THAP9	0.226326	2.89e-14	0.725788	0	6.6963	2.14e-11	#ERROR!
NPHP1	THAP9	0.425271	0	0.815576	0	6.69529	2.15e-11	#ERROR!
LINC02518	THAP9	0.022525	0.455063	0.611693	6.15e-13	6.69278	2.19e-11	0/+
EPCAM-DT	THAP9	0.074477	0.013399	0.643067	1.6e-14	6.68967	2.24e-11	#ERROR!
COQ7	THAP9	0.547728	0	0.862701	0	6.68878	2.25e-11	#ERROR!
MACROD2	THAP9	0.375684	0	0.794532	0	6.68781	2.27e-11	#ERROR!
SFMBT2	THAP9	0.307691	0	0.764305	0	6.68695	2.28e-11	#ERROR!
SASS6	THAP9	0.643529	0	0.896176	0	6.68482	2.31e-11	#ERROR!
CLDN12	THAP9	0.517173	0	0.851158	0	6.68088	2.38e-11	#ERROR!
TMEM232	THAP9	0.252639	0	0.737912	0	6.67877	2.41e-11	#ERROR!
MTUS1	THAP9	0.358913	0	0.786829	0	6.67646	2.45e-11	#ERROR!
LINC01883	THAP9	0.102029	0.000694	0.65826	2.22e-15	6.67588	2.46e-11	#ERROR!
RPS6KA6	THAP9	0.393688	0	0.801745	0	6.67556	2.46e-11	#ERROR!
KIF20B	THAP9	0.565482	0	0.868784	0	6.67485	2.47e-11	#ERROR!
AQP4	THAP9	0.17241	8.41e-09	0.696969	0	6.67471	2.48e-11	#ERROR!
EIF3EP1	THAP9	0.455899	0	0.827189	0	6.67292	2.51e-11	#ERROR!
STON2	THAP9	0.213911	7.17e-13	0.718339	0	6.67185	2.53e-11	#ERROR!
PRDM2	THAP9	0.549437	0	0.862846	0	6.67054	2.55e-11	#ERROR!
ABCA5	THAP9	0.448681	0	0.824185	0	6.66934	2.57e-11	#ERROR!
TUSC3	THAP9	0.239485	8.88e-16	0.731014	0	6.66929	2.57e-11	#ERROR!
PCDHGA7	THAP9	0.204732	6.82e-12	0.713425	0	6.66719	2.61e-11	#ERROR!
TRMT11	THAP9	0.559072	0	0.866256	0	6.66661	2.62e-11	#ERROR!
PIK3R1	THAP9	0.30631	0	0.762642	0	6.66306	2.68e-11	#ERROR!
DCHS2	THAP9	0.153155	3.25e-07	0.685746	0	6.658	2.78e-11	#ERROR!
LINC00271	THAP9	0.300547	0	0.759554	0	6.6534	2.86e-11	#ERROR!
C12orf66	THAP9	0.59509	0	0.87864	0	6.64587	3.01e-11	#ERROR!
N4BP2L1	THAP9	0.408076	0	0.806619	0	6.64307	3.07e-11	#ERROR!
SRGAP3	THAP9	0.347739	0	0.78031	0	6.63646	3.21e-11	#ERROR!
PCDH7	THAP9	0.136331	5.58e-06	0.675231	2.22e-16	6.63468	3.25e-11	#ERROR!
SCN2B	THAP9	0.046674	0.121507	0.622667	1.79e-13	6.63013	3.35e-11	0/+
NKAPP1	THAP9	0.393057	0	0.799654	0	6.62626	3.44e-11	#ERROR!
ETV1	THAP9	0.259359	0	0.73863	0	6.62425	3.49e-11	#ERROR!
PTPN22	THAP9	0.212545	1.01e-12	0.714734	0	6.6138	3.75e-11	#ERROR!
GCNT2	THAP9	0.214788	5.75e-13	0.715873	0	6.61361	3.75e-11	#ERROR!
SUGT1P3	THAP9	0.384633	0	0.795445	0	6.6103	3.84e-11	#ERROR!
DUOXA1	THAP9	0.036642	0.224212	0.614756	4.38e-13	6.60324	4.02e-11	0/+
AASDHPPT	THAP9	0.604015	0	0.880701	0	6.59902	4.14e-11	#ERROR!
GLT8D2	THAP9	0.095032	0.001587	0.649389	7.11e-15	6.594	4.28e-11	#ERROR!
KLRK1-AS1	THAP9	0.039075	0.19492	0.615392	4.08e-13	6.58951	4.41e-11	0/+
NAPB	THAP9	0.563666	0	0.865891	0	6.5873	4.48e-11	#ERROR!
MAP3K7	THAP9	0.628308	0	0.888881	0	6.58462	4.56e-11	#ERROR!
RRP15	THAP9	0.543295	0	0.858257	0	6.58378	4.59e-11	#ERROR!
KIAA1328	THAP9	0.56082	0	0.864683	0	6.58099	4.67e-11	#ERROR!
DUBR	THAP9	0.358276	0	0.782727	0	6.57986	4.71e-11	#ERROR!
OVCH2	THAP9	0.083305	0.005656	0.641629	1.91e-14	6.5796	4.72e-11	#ERROR!
SDHAF3	THAP9	0.197884	3.42e-11	0.705137	0	6.57451	4.88e-11	#ERROR!
LOC100507516	THAP9	0.149631	6.05e-07	0.679212	0	6.57423	4.89e-11	#ERROR!
TRAF3IP2	THAP9	0.328648	0	0.769115	0	6.57383	4.9e-11	#ERROR!
PIWIL4	THAP9	0.175872	4.16e-09	0.693435	0	6.57362	4.91e-11	#ERROR!
C1orf112	THAP9	0.487735	0	0.83664	0	6.57323	4.92e-11	#ERROR!
SLC4A5	THAP9	0.36703	0	0.786331	0	6.57299	4.93e-11	#ERROR!
LMO7-AS1	THAP9	0.031086	0.302528	0.609114	8.16e-13	6.56966	5.04e-11	0/+
FSIP2-AS1	THAP9	0.152107	3.91e-07	0.680286	0	6.56902	5.06e-11	#ERROR!
AMOT	THAP9	0.338432	0	0.773351	0	6.56844	5.08e-11	#ERROR!
AJUBA	THAP9	0.25955	0	0.736081	0	6.56801	5.1e-11	#ERROR!
TIMM8A	THAP9	0.443484	0	0.818681	0	6.56799	5.1e-11	#ERROR!
CLDN19	THAP9	0.055009	0.067938	0.623805	1.58e-13	6.56703	5.13e-11	0/+
MAGI1-IT1	THAP9	0.223997	5.33e-14	0.71816	0	6.56538	5.19e-11	#ERROR!
SLC13A3	THAP9	0.168223	1.93e-08	0.688867	0	6.56522	5.2e-11	#ERROR!
LINC00987	THAP9	0.21659	3.64e-13	0.714323	0	6.56447	5.22e-11	#ERROR!
MIR181A2HG	THAP9	0.081243	0.006968	0.639344	2.51e-14	6.56213	5.3e-11	#ERROR!
KCTD3	THAP9	0.501134	0	0.841524	0	6.56129	5.33e-11	#ERROR!
SMC5	THAP9	0.631035	0	0.88932	0	6.56108	5.34e-11	#ERROR!
KDM4C	THAP9	0.502804	0	0.842167	0	6.56104	5.34e-11	#ERROR!
SPTBN1	THAP9	0.517239	0	-0.1025	0.280001	-6.56002	5.38e-11	#ERROR!
KLF12	THAP9	0.392863	0	0.796973	0	6.55668	5.5e-11	#ERROR!
CATSPERB	THAP9	0.082602	0.006076	0.639804	2.38e-14	6.5564	5.51e-11	#ERROR!
TMEM161B	THAP9	0.624331	0	0.886872	0	6.55598	5.53e-11	#ERROR!
SUCO	THAP9	0.575027	0	0.869125	0	6.55097	5.72e-11	#ERROR!
NEU3	THAP9	0.527369	0	0.851271	0	6.54868	5.8e-11	#ERROR!
ANKMY2	THAP9	0.432842	0	0.813594	0	6.54796	5.83e-11	#ERROR!
PPP2R1B	THAP9	0.468468	0	-0.16447	0.081717	-6.54703	5.87e-11	#ERROR!
FAM111A-DT	THAP9	0.45852	0	0.824106	0	6.54664	5.88e-11	#ERROR!
PROSER1	THAP9	0.502693	0	0.841653	0	6.54533	5.94e-11	#ERROR!
GPCPD1	THAP9	0.326471	0	0.766868	0	6.54432	5.98e-11	#ERROR!
KDM1B	THAP9	0.588434	0	0.873714	0	6.53937	6.18e-11	#ERROR!
PATL1	THAP9	0.52324	0	0.849389	0	6.53807	6.23e-11	#ERROR!
PCNX4	THAP9	0.643183	0	0.893017	0	6.53693	6.28e-11	#ERROR!
SLC25A13	THAP9	0.431681	0	0.812697	0	6.5361	6.31e-11	#ERROR!
FANCL	THAP9	0.58321	0	0.871726	0	6.53561	6.34e-11	#ERROR!
MSANTD2	THAP9	0.394855	0	0.796977	0	6.53387	6.41e-11	#ERROR!
CDC14A	THAP9	0.379109	0	0.790098	0	6.53331	6.43e-11	#ERROR!
GNPTAB	THAP9	0.515158	0	0.846107	0	6.53223	6.48e-11	#ERROR!
GUSBP1	THAP9	0.462745	0	0.825204	0	6.52789	6.67e-11	#ERROR!
ALKBH8	THAP9	0.591954	0	0.874689	0	6.52706	6.71e-11	#ERROR!
PRMT3	THAP9	0.642091	0	0.892416	0	6.52626	6.74e-11	#ERROR!
ITSN1	THAP9	0.486663	0	-0.13921	0.141409	-6.52484	6.81e-11	#ERROR!
CA13	THAP9	0.256426	0	0.732458	0	6.52416	6.84e-11	#ERROR!
TRPM3	THAP9	0.08657	0.004028	0.64014	2.26e-14	6.52311	6.89e-11	#ERROR!
MMP20	THAP9	0.005561	0.853702	0.58967	6.34e-12	6.52287	6.9e-11	0/+
NAA35	THAP9	0.631376	0	0.888595	0	6.52196	6.94e-11	#ERROR!
CROT	THAP9	0.248075	0	0.727912	0	6.5162	7.21e-11	#ERROR!
APLF	THAP9	0.260842	0	0.734262	0	6.51609	7.22e-11	#ERROR!
GOLGA8B	THAP9	0.151477	4.37e-07	0.676991	2.22e-16	6.51594	7.22e-11	#ERROR!
PPP1R3B	THAP9	0.321147	0	0.763139	0	6.51476	7.28e-11	#ERROR!
MIR205HG	THAP9	-0.05789	0.054725	0.546101	3.95e-10	6.51472	7.28e-11	0/+
SPDL1	THAP9	0.516676	0	0.846112	0	6.51232	7.4e-11	#ERROR!
RUFY1-AS1	THAP9	0.221066	1.15e-13	0.713799	0	6.50841	7.59e-11	#ERROR!
MTMR7	THAP9	0.340451	0	0.771752	0	6.50776	7.63e-11	#ERROR!
BDNF-AS	THAP9	0.466355	0	0.825998	0	6.50739	7.65e-11	#ERROR!
RABL2A	THAP9	0.355526	0	0.778358	0	6.50188	7.93e-11	#ERROR!
PATJ	THAP9	0.488588	0	0.834671	0	6.49897	8.09e-11	#ERROR!
ARMCX5	THAP9	0.580865	0	0.86985	0	6.49468	8.32e-11	#ERROR!
FRK	THAP9	0.318014	0	0.760731	0	6.4929	8.42e-11	#ERROR!
MYH4	THAP9	0.050265	0.095363	0.616082	3.78e-13	6.4914	8.5e-11	0/+
ALOX12P2	THAP9	0.115053	0.000129	0.654744	3.55e-15	6.48786	8.71e-11	#ERROR!
PPIEL	THAP9	0.175613	4.39e-09	0.688679	0	6.48779	8.71e-11	#ERROR!
PPIL6	THAP9	0.38542	0	0.791083	0	6.48704	8.75e-11	#ERROR!
OAT	THAP9	0.407003	0	0.800358	0	6.48396	8.93e-11	#ERROR!
SRSF8	THAP9	0.410555	0	0.801861	0	6.4833	8.97e-11	#ERROR!
CACNA1C	THAP9	0.169162	1.6e-08	0.684772	0	6.48055	9.14e-11	#ERROR!
ARL10	THAP9	0.306088	0	0.754501	0	6.47919	9.22e-11	#ERROR!
LPAR3	THAP9	0.016288	0.589111	0.593624	4.23e-12	6.47776	9.31e-11	0/+
SOX2-OT	THAP9	0.295439	0	0.749346	0	6.4777	9.31e-11	#ERROR!
MEGF10	THAP9	0.257299	0	0.730661	0	6.47753	9.32e-11	#ERROR!
C5orf34	THAP9	0.482039	0	0.83134	0	6.47647	9.39e-11	#ERROR!
CBFB	THAP9	0.479756	0	0.830391	0	6.47556	9.45e-11	#ERROR!
CHRM3	THAP9	0.207747	3.29e-12	0.705144	0	6.47475	9.5e-11	#ERROR!
TNNT2	THAP9	-0.05143	0.087906	0.547734	3.42e-10	6.47447	9.51e-11	0/+
PDCD4	THAP9	0.307224	0	0.754699	0	6.47147	9.71e-11	#ERROR!
GOLGA8A	THAP9	0.155234	2.23e-07	0.676394	2.22e-16	6.46789	9.94e-11	#ERROR!
PRKCE	THAP9	0.376333	0	0.786246	0	6.46598	1.01e-10	#ERROR!
P3H2	THAP9	0.121484	5.27e-05	0.657167	2.66e-15	6.46581	1.01e-10	#ERROR!
MSH2	THAP9	0.633579	0	0.88807	0	6.46213	1.03e-10	#ERROR!
KLHL2	THAP9	0.399067	0	0.796078	0	6.46143	1.04e-10	#ERROR!
CYYR1-AS1	THAP9	0.121502	5.26e-05	0.656918	2.66e-15	6.46138	1.04e-10	#ERROR!
TAS2R14	THAP9	0.368518	0	0.782563	0	6.46115	1.04e-10	#ERROR!
CEACAM19	THAP9	0.078883	0.0088	0.631582	6.37e-14	6.45875	1.06e-10	#ERROR!
LMO7	THAP9	0.309391	0	0.755079	0	6.4568	1.07e-10	#ERROR!
CDCA7	THAP9	0.168337	1.89e-08	0.682977	0	6.45604	1.07e-10	#ERROR!
PHKA1	THAP9	0.560227	0	0.861078	0	6.45233	1.1e-10	#ERROR!
ASCC3	THAP9	0.538641	0	0.852795	0	6.44976	1.12e-10	#ERROR!
GOLPH3L	THAP9	0.484468	0	0.831452	0	6.44923	1.12e-10	#ERROR!
KCNMB2	THAP9	0.079569	0.008227	0.631342	6.55e-14	6.44817	1.13e-10	#ERROR!
CCDC110	THAP9	0.437327	0	0.811939	0	6.44686	1.14e-10	#ERROR!
FZD6	THAP9	0.446895	0	0.815842	0	6.44364	1.17e-10	#ERROR!
PHF20	THAP9	0.616554	0	0.881369	0	6.43395	1.24e-10	#ERROR!
NRG1	THAP9	0.027066	0.369375	0.597512	2.82e-12	6.43155	1.26e-10	0/+
ACVR2B-AS1	THAP9	0.435487	0	0.810449	0	6.42661	1.3e-10	#ERROR!
RAB40A	THAP9	0.193504	9.32e-11	0.695031	0	6.42623	1.31e-10	#ERROR!
SIK3	THAP9	0.414935	0	0.80158	0	6.4244	1.32e-10	#ERROR!
ABHD15	THAP9	0.370933	0	-0.26524	0.004522	-6.42226	1.34e-10	#ERROR!
SMYD2	THAP9	0.284998	0	0.741734	0	6.42197	1.35e-10	#ERROR!
DDX59	THAP9	0.614038	0	0.880164	0	6.42107	1.35e-10	#ERROR!
RORC	THAP9	0.192742	1.11e-10	0.694293	0	6.42007	1.36e-10	#ERROR!
KCTD9	THAP9	0.461112	0	0.820851	0	6.41699	1.39e-10	#ERROR!
SCAF8	THAP9	0.675024	0	0.901582	0	6.41694	1.39e-10	#ERROR!
TRIM5	THAP9	0.359495	0	0.776596	0	6.4144	1.41e-10	#ERROR!
PPFIA4	THAP9	0.16307	5.22e-08	0.677644	2.22e-16	6.41222	1.43e-10	#ERROR!
DSC1	THAP9	0.223884	5.51e-14	0.71023	0	6.4093	1.46e-10	#ERROR!
PSMA3-AS1	THAP9	0.478754	0	0.827844	0	6.40906	1.46e-10	#ERROR!
LINC00887	THAP9	-0.00651	0.829042	0.573707	3.09e-11	6.40578	1.5e-10	0/+
MMS22L	THAP9	0.565216	0	0.861698	0	6.40478	1.51e-10	#ERROR!
EDAR	THAP9	0.022362	0.458328	0.592521	4.74e-12	6.40221	1.53e-10	0/+
PALM	THAP9	0.075383	0.012308	-0.52523	2.33e-09	-6.40112	1.54e-10	#ERROR!
KDM5B	THAP9	0.506434	0	0.838628	0	6.3967	1.59e-10	#ERROR!
RPL31P46	THAP9	0.105769	0.000436	0.643842	1.44e-14	6.39605	1.59e-10	#ERROR!
SMIM8	THAP9	0.462186	0	0.820493	0	6.39311	1.63e-10	#ERROR!
MCC	THAP9	0.297703	0	0.746506	0	6.39098	1.65e-10	#ERROR!
COL4A4	THAP9	0.093802	0.001826	0.636135	3.69e-14	6.38668	1.7e-10	#ERROR!
CFAP69	THAP9	0.257544	0	0.726271	0	6.38414	1.72e-10	#ERROR!
SMIM10L2A	THAP9	0.041309	0.170579	0.603495	1.5e-12	6.38393	1.73e-10	0/+
EXPH5	THAP9	0.473536	0	0.824829	0	6.38227	1.74e-10	#ERROR!
NIPAL1	THAP9	0.211825	1.21e-12	0.702454	0	6.38154	1.75e-10	#ERROR!
PLD5	THAP9	0.081735	0.006632	0.628465	9.19e-14	6.38066	1.76e-10	#ERROR!
TRPC6	THAP9	0.260962	0	0.727679	0	6.37756	1.8e-10	#ERROR!
PFKFB2	THAP9	0.361006	0	0.775766	0	6.37727	1.8e-10	#ERROR!
NAT8L	THAP9	0.193698	8.92e-11	-0.43039	1.95e-06	-6.37679	1.81e-10	#ERROR!
BTRC	THAP9	0.532337	0	0.848245	0	6.37585	1.82e-10	#ERROR!
PECR	THAP9	0.370784	0	-0.26094	0.005246	-6.37574	1.82e-10	#ERROR!
CD47	THAP9	0.480359	0	0.827377	0	6.37439	1.84e-10	#ERROR!
PALLD	THAP9	0.338321	0	0.76499	0	6.37079	1.88e-10	#ERROR!
IL1RL2	THAP9	0.104678	0.0005	0.641532	1.91e-14	6.36856	1.91e-10	#ERROR!
OSGEPL1	THAP9	0.599864	0	0.873708	0	6.36754	1.92e-10	#ERROR!
LCA5	THAP9	0.466348	0	0.821351	0	6.36714	1.93e-10	#ERROR!
LOC101930275	THAP9	0.142667	1.98e-06	0.663516	1.11e-15	6.36576	1.94e-10	#ERROR!
F2RL1	THAP9	0.241637	4.44e-16	0.717127	0	6.36354	1.97e-10	#ERROR!
CLCA4	THAP9	0.037398	0.214795	0.599566	2.27e-12	6.36219	1.99e-10	0/+
EDRF1-DT	THAP9	0.392678	0	0.789368	0	6.35961	2.02e-10	#ERROR!
TENM2	THAP9	0.156522	1.77e-07	0.670943	4.44e-16	6.35814	2.04e-10	#ERROR!
SLC22A4	THAP9	0.214155	6.74e-13	0.702386	0	6.35653	2.06e-10	#ERROR!
GRAMD2A	THAP9	0.001417	0.96253	0.57514	2.69e-11	6.34955	2.16e-10	0/+
GRAMD1B	THAP9	0.129947	1.51e-05	0.655103	3.55e-15	6.3471	2.19e-10	#ERROR!
SEMA3D	THAP9	0.143837	1.63e-06	0.663063	1.33e-15	6.3463	2.21e-10	#ERROR!
COL4A5	THAP9	0.156	1.94e-07	0.669913	4.44e-16	6.34514	2.22e-10	#ERROR!
SLC2A11	THAP9	0.294488	0	0.742833	0	6.34513	2.22e-10	#ERROR!
LINC01138	THAP9	0.140848	2.68e-06	0.661152	1.55e-15	6.34288	2.26e-10	#ERROR!
EHF	THAP9	0.261015	0	0.72596	0	6.3416	2.27e-10	#ERROR!
RFX3-AS1	THAP9	0.3252	0	0.757506	0	6.34113	2.28e-10	#ERROR!
NUP62CL	THAP9	0.341697	0	0.765267	0	6.34021	2.29e-10	#ERROR!
THUMPD1	THAP9	0.668294	0	0.897706	0	6.33857	2.32e-10	#ERROR!
BIRC2	THAP9	0.587047	0	0.868196	0	6.33795	2.33e-10	#ERROR!
DCUN1D2	THAP9	0.364586	0	0.775787	0	6.33773	2.33e-10	#ERROR!
KRT39	THAP9	0.121798	5.04e-05	0.649636	7.11e-15	6.33507	2.37e-10	#ERROR!
PSME4	THAP9	0.46799	0	0.820889	0	6.33295	2.41e-10	#ERROR!
NEDD4	THAP9	0.430771	0	0.804967	0	6.32981	2.45e-10	#ERROR!
COX10-AS1	THAP9	0.476249	0	0.824192	0	6.3289	2.47e-10	#ERROR!
ARHGAP44	THAP9	0.204181	7.78e-12	0.69558	0	6.32857	2.47e-10	#ERROR!
PAK1	THAP9	0.376536	0	0.780768	0	6.32589	2.52e-10	#ERROR!
C8orf88	THAP9	0.167231	2.34e-08	0.675025	2.22e-16	6.32379	2.55e-10	#ERROR!
GORAB	THAP9	0.538592	0	0.849154	0	6.32226	2.58e-10	#ERROR!
ACTA2-AS1	THAP9	0.049271	0.102098	0.60448	1.35e-12	6.3215	2.59e-10	0/+
AUTS2	THAP9	0.360418	0	0.773193	0	6.32138	2.59e-10	#ERROR!
RASSF5	THAP9	0.120256	6.28e-05	0.647807	8.88e-15	6.3196	2.62e-10	#ERROR!
POT1	THAP9	0.610901	0	0.876619	0	6.31908	2.63e-10	#ERROR!
CCDC14	THAP9	0.48349	0	0.82665	0	6.31246	2.75e-10	#ERROR!
LINC02872	THAP9	-0.00737	0.806904	0.566625	6.08e-11	6.31222	2.75e-10	0/+
PACRG	THAP9	0.14003	3.07e-06	0.658876	2.22e-15	6.31182	2.76e-10	#ERROR!
LRIF1	THAP9	0.568073	0	0.860269	0	6.31023	2.79e-10	#ERROR!
NOC3L	THAP9	0.666645	0	0.896533	0	6.30905	2.81e-10	#ERROR!
KIAA2012-AS1	THAP9	0.131262	1.23e-05	0.653625	4.22e-15	6.30899	2.81e-10	#ERROR!
GLI3	THAP9	0.351519	0	0.768535	0	6.30886	2.81e-10	#ERROR!
SRPK1	THAP9	0.523294	0	0.842649	0	6.30701	2.84e-10	#ERROR!
SNHG26	THAP9	0.02271	0.451371	0.586319	8.91e-12	6.30653	2.85e-10	0/+
C1orf21	THAP9	0.215648	4.62e-13	0.700553	0	6.30628	2.86e-10	#ERROR!
NVL	THAP9	0.397818	0	0.789489	0	6.30358	2.91e-10	#ERROR!
KDM3A	THAP9	0.641384	0	0.887393	0	6.3034	2.91e-10	#ERROR!
EXOSC8	THAP9	0.328596	0	0.757442	0	6.30274	2.92e-10	#ERROR!
SUV39H2	THAP9	0.466199	0	0.819062	0	6.30104	2.96e-10	#ERROR!
RNF207	THAP9	0.190203	1.95e-10	0.686497	0	6.30099	2.96e-10	#ERROR!
PARP2	THAP9	0.468676	0	0.820089	0	6.30065	2.96e-10	#ERROR!
IQGAP2	THAP9	0.297398	0	0.742153	0	6.29942	2.99e-10	#ERROR!
GRIA4	THAP9	0.032076	0.287391	0.591926	5.03e-12	6.29891	3e-10	0/+
FOXC1	THAP9	0.076726	0.010838	0.620195	2.38e-13	6.29799	3.02e-10	#ERROR!
ITPRIPL1	THAP9	0.103555	0.000575	0.636551	3.51e-14	6.29782	3.02e-10	#ERROR!
SLC25A51	THAP9	0.589036	0	0.028327	0.765828	-6.29225	3.13e-10	#ERROR!
ITPR1	THAP9	0.389574	0	0.785	0	6.28366	3.31e-10	#ERROR!
REPS1	THAP9	0.507296	0	0.835449	0	6.2823	3.34e-10	#ERROR!
CUL3	THAP9	0.679308	0	0.900424	0	6.28035	3.38e-10	#ERROR!
CCL28	THAP9	0.101477	0.000742	0.634193	4.66e-14	6.2798	3.39e-10	#ERROR!
SPICE1	THAP9	0.551613	0	0.852972	0	6.27682	3.46e-10	#ERROR!
TTC30A	THAP9	0.54088	0	0.848732	0	6.27621	3.47e-10	#ERROR!
C2orf68	THAP9	0.543363	0	0.849687	0	6.27534	3.49e-10	#ERROR!
RBL1	THAP9	0.559093	0	0.855709	0	6.2702	3.61e-10	#ERROR!
MMD	THAP9	0.353404	0	-0.26943	0.003904	-6.27018	3.61e-10	#ERROR!
FAM227B	THAP9	0.517671	0	0.839276	0	6.27003	3.61e-10	#ERROR!
TESK1	THAP9	0.306137	0	-0.31785	0.000602	-6.26967	3.62e-10	#ERROR!
ITGA9-AS1	THAP9	0.274387	0	0.72919	0	6.26835	3.65e-10	#ERROR!
RASA2	THAP9	0.582888	0	0.864655	0	6.2614	3.82e-10	#ERROR!
RFWD3	THAP9	0.534099	0	0.845598	0	6.26099	3.83e-10	#ERROR!
SLCO1A2	THAP9	0.076664	0.010902	0.617802	3.12e-13	6.26091	3.83e-10	#ERROR!
COLCA1	THAP9	0.041313	0.170539	0.595347	3.53e-12	6.26037	3.84e-10	0/+
NCKAP5	THAP9	0.363658	0	0.772131	0	6.25956	3.86e-10	#ERROR!
KAT7	THAP9	0.658247	0	0.892506	0	6.25868	3.88e-10	#ERROR!
TP53BP2	THAP9	0.431536	0	0.802693	0	6.25827	3.89e-10	#ERROR!
RBM26	THAP9	0.602508	0	0.87197	0	6.25641	3.94e-10	#ERROR!
SACS	THAP9	0.37375	0	0.77658	0	6.25406	4e-10	#ERROR!
LINC01184	THAP9	0.415848	0	0.795502	0	6.25075	4.08e-10	#ERROR!
SLC16A4	THAP9	0.257033	0	0.719293	0	6.24752	4.17e-10	#ERROR!
TCTE1	THAP9	0.1571	1.59e-07	0.664911	8.88e-16	6.2466	4.19e-10	#ERROR!
CPSF7	THAP9	0.602699	0	0.871727	0	6.24367	4.27e-10	#ERROR!
NEDD4L	THAP9	0.47499	0	0.820823	0	6.24354	4.28e-10	#ERROR!
TMX4	THAP9	0.453332	0	0.811608	0	6.24352	4.28e-10	#ERROR!
METTL17	THAP9	0.328751	0	0.754885	0	6.24306	4.29e-10	#ERROR!
CCDC160	THAP9	0.14502	1.34e-06	0.657713	2.44e-15	6.24241	4.31e-10	#ERROR!
ASNS	THAP9	0.283123	0	0.732322	0	6.24164	4.33e-10	#ERROR!
METTL15	THAP9	0.665997	0	0.894888	0	6.23957	4.39e-10	#ERROR!
ECRG4	THAP9	0.027869	0.355347	0.585121	1e-11	6.23869	4.41e-10	0/+
C17orf75	THAP9	0.604478	0	0.87225	0	6.2377	4.44e-10	#ERROR!
ATP1B1	THAP9	0.285534	0	0.733336	0	6.23743	4.45e-10	#ERROR!
INSYN2B	THAP9	0.193174	1e-10	0.684635	0	6.2369	4.46e-10	#ERROR!
MFSD6	THAP9	0.458341	0	0.813503	0	6.23629	4.48e-10	#ERROR!
PLK2	THAP9	0.236716	1.78e-15	0.708105	0	6.23619	4.48e-10	#ERROR!
CBR3-AS1	THAP9	0.175832	4.2e-09	0.674935	2.22e-16	6.23611	4.49e-10	#ERROR!
NOL11	THAP9	0.588485	0	0.866127	0	6.23559	4.5e-10	#ERROR!
SV2C	THAP9	0.157106	1.59e-07	0.663924	1.11e-15	6.22938	4.68e-10	#ERROR!
PLEKHG4B	THAP9	0.109712	0.000263	0.635943	3.77e-14	6.22739	4.74e-10	#ERROR!
PPP4R3A	THAP9	0.638556	0	0.884656	0	6.22626	4.78e-10	#ERROR!
AKAP6	THAP9	0.37424	0	0.775657	0	6.22598	4.79e-10	#ERROR!
MXI1	THAP9	0.452266	0	0.810476	0	6.22441	4.83e-10	#ERROR!
CXCL5	THAP9	0.031312	0.299022	0.586394	8.84e-12	6.22404	4.85e-10	0/+
PPP1R9A	THAP9	0.524429	0	0.840559	0	6.22226	4.9e-10	#ERROR!
DNAJC3-DT	THAP9	0.436553	0	0.803488	0	6.21999	4.97e-10	#ERROR!
MTHFD1	THAP9	0.519624	0	-0.0643	0.498662	-6.21802	5.03e-10	#ERROR!
CFAP54	THAP9	0.273741	0	0.72624	0	6.21423	5.16e-10	#ERROR!
FGF1	THAP9	0.183835	7.84e-10	0.678179	0	6.21389	5.17e-10	#ERROR!
HADH	THAP9	0.54276	0	-0.03159	0.739743	-6.2127	5.21e-10	#ERROR!
TPPP2	THAP9	0.090367	0.002677	0.623222	1.69e-13	6.21249	5.22e-10	#ERROR!
EFHC1	THAP9	0.485231	0	0.824085	0	6.21221	5.22e-10	#ERROR!
HS3ST4	THAP9	-0.01384	0.646323	0.555076	1.77e-10	6.21138	5.25e-10	0/+
BBOF1	THAP9	0.36501	0	0.770619	0	6.20816	5.36e-10	#ERROR!
ARRDC3	THAP9	0.421927	0	0.796592	0	6.20802	5.37e-10	#ERROR!
RUNX3	THAP9	0.047195	0.117397	0.595382	3.52e-12	6.20366	5.52e-10	0/+
LINC02607	THAP9	0.081113	0.007059	0.616912	3.45e-13	6.20346	5.52e-10	#ERROR!
SINHCAF	THAP9	0.441744	0	0.805134	0	6.20278	5.55e-10	#ERROR!
DEK	THAP9	0.528938	0	0.841753	0	6.2013	5.6e-10	#ERROR!
IL12A	THAP9	0.034869	0.247456	0.587168	8.18e-12	6.20092	5.61e-10	0/+
FAM218A	THAP9	0.308351	0	0.742878	0	6.198	5.72e-10	#ERROR!
PCID2	THAP9	0.466268	0	0.815553	0	6.19753	5.74e-10	#ERROR!
EDRF1	THAP9	0.580891	0	0.862213	0	6.19752	5.74e-10	#ERROR!
FBXO5	THAP9	0.485637	0	0.823762	0	6.19728	5.74e-10	#ERROR!
LIPJ	THAP9	0.139182	3.52e-06	0.651642	5.33e-15	6.1971	5.75e-10	#ERROR!
PPP1CB	THAP9	0.569693	0	0.857839	0	6.1969	5.76e-10	#ERROR!
CDHR1	THAP9	-0.02396	0.426836	0.54668	3.75e-10	6.19265	5.92e-10	0/+
MAGOHB	THAP9	0.431832	0	0.800391	0	6.19222	5.93e-10	#ERROR!
RALGPS2	THAP9	0.394739	0	0.783706	0	6.19174	5.95e-10	#ERROR!
ST8SIA6	THAP9	0.236708	1.78e-15	0.705692	0	6.18942	6.04e-10	#ERROR!
RNASE13	THAP9	0.00299	0.921019	0.564736	7.26e-11	6.18459	6.23e-10	0/+
FAM135A	THAP9	0.388617	0	0.780603	0	6.18434	6.24e-10	#ERROR!
SIMC1	THAP9	0.322045	0	0.748974	0	6.18379	6.26e-10	#ERROR!
CNKSR3	THAP9	0.191442	1.48e-10	0.680434	0	6.17797	6.49e-10	#ERROR!
TFB2M	THAP9	0.519526	0	0.83711	0	6.17466	6.63e-10	#ERROR!
LSINCT5	THAP9	0.113722	0.000155	0.635066	4.22e-14	6.17367	6.67e-10	#ERROR!
EGF	THAP9	0.196278	4.95e-11	0.682873	0	6.17343	6.68e-10	#ERROR!
COL19A1	THAP9	0.09685	0.001286	0.624749	1.41e-13	6.17327	6.69e-10	#ERROR!
BICD1	THAP9	0.392756	0	0.78202	0	6.17221	6.73e-10	#ERROR!
NFYC	THAP9	0.409312	0	0.789558	0	6.17199	6.74e-10	#ERROR!
NPAS2	THAP9	0.095751	0.001461	0.623882	1.56e-13	6.17024	6.82e-10	#ERROR!
CDKL2	THAP9	0.290357	0	0.732436	0	6.16746	6.94e-10	#ERROR!
KIT	THAP9	0.241009	4.44e-16	0.706812	0	6.16682	6.97e-10	#ERROR!
LINC01671	THAP9	0.028145	0.350602	0.58023	1.64e-11	6.16409	7.09e-10	0/+
SPHKAP	THAP9	0.096449	0.001348	0.623745	1.59e-13	6.16121	7.22e-10	#ERROR!
P3H2-AS1	THAP9	0.024133	0.423525	0.577357	2.17e-11	6.16111	7.22e-10	0/+
KRBOX1	THAP9	-0.01403	0.641642	0.551283	2.49e-10	6.16021	7.26e-10	0/+
CCDC169	THAP9	0.175123	4.85e-09	0.670221	4.44e-16	6.15961	7.29e-10	#ERROR!
CXXC4	THAP9	0.425227	0	0.796176	0	6.15793	7.37e-10	#ERROR!
PFN2	THAP9	0.330562	0	0.751958	0	6.15756	7.39e-10	#ERROR!
CEP57	THAP9	0.590018	0	0.864574	0	6.15271	7.62e-10	#ERROR!
ARMCX2	THAP9	0.307111	0	0.74013	0	6.152	7.65e-10	#ERROR!
CFAP44	THAP9	0.387939	0	0.778931	0	6.15066	7.72e-10	#ERROR!
TNKS	THAP9	0.548527	0	0.848155	0	6.15061	7.72e-10	#ERROR!
TTC39B	THAP9	0.371735	0	0.771314	0	6.14923	7.79e-10	#ERROR!
TRPV6	THAP9	-0.06161	0.040886	0.516379	4.79e-09	6.1487	7.81e-10	-/+
CRISPLD1	THAP9	0.239816	6.66e-16	0.70521	0	6.14809	7.84e-10	#ERROR!
SLC35F3	THAP9	0.083497	0.005546	0.614837	4.34e-13	6.1477	7.86e-10	#ERROR!
FAM169A	THAP9	0.375542	0	0.772955	0	6.14574	7.96e-10	#ERROR!
OBSCN	THAP9	0.119893	6.61e-05	0.637071	3.31e-14	6.14561	7.97e-10	#ERROR!
CHD7	THAP9	0.433839	0	0.799511	0	6.14447	8.02e-10	#ERROR!
FUT9	THAP9	0.162283	6.06e-08	0.661932	1.33e-15	6.14326	8.08e-10	#ERROR!
TIPRL	THAP9	0.568619	0	0.855948	0	6.14319	8.09e-10	#ERROR!
OSBPL9	THAP9	0.53134	0	0.840976	0	6.14299	8.1e-10	#ERROR!
CDNF	THAP9	0.412127	0	0.789668	0	6.14194	8.15e-10	#ERROR!
NEK10	THAP9	0.131224	1.24e-05	0.643487	1.51e-14	6.13942	8.28e-10	#ERROR!
LOC100505774	THAP9	0.211636	1.26e-12	0.689465	0	6.13877	8.32e-10	#ERROR!
LRP2BP	THAP9	0.481755	0	0.820094	0	6.1367	8.43e-10	#ERROR!
CFL1P1	THAP9	0.340373	0	0.75567	0	6.13369	8.59e-10	#ERROR!
ANKRD18A	THAP9	0.226242	2.93e-14	0.697107	0	6.13269	8.64e-10	#ERROR!
RNASE7	THAP9	-0.01276	0.672186	0.550088	2.77e-10	6.13118	8.72e-10	0/+
TMPRSS2	THAP9	0.145731	1.18e-06	0.651563	5.55e-15	6.13082	8.74e-10	#ERROR!
THEMIS	THAP9	0.158514	1.23e-07	0.659021	2.22e-15	6.13068	8.75e-10	#ERROR!
GPR61	THAP9	0.255389	0	0.712522	0	6.12971	8.8e-10	#ERROR!
GPR89B	THAP9	0.425556	0	0.795238	0	6.1292	8.83e-10	#ERROR!
GPATCH2	THAP9	0.525001	0	0.837946	0	6.12876	8.86e-10	#ERROR!
AMOTL1	THAP9	0.258705	0	0.71421	0	6.12862	8.86e-10	#ERROR!
NKX1-2	THAP9	-0.01953	0.517172	0.545028	4.34e-10	6.12676	8.97e-10	0/+
PRKAR2B	THAP9	0.37863	0	-0.22824	0.015038	-6.12655	8.98e-10	#ERROR!
ASB14	THAP9	0.435265	0	0.799407	0	6.1246	9.09e-10	#ERROR!
GAN	THAP9	0.458099	0	0.80947	0	6.12456	9.09e-10	#ERROR!
GFI1	THAP9	0.089754	0.002862	0.617128	3.36e-13	6.12232	9.22e-10	#ERROR!
COL7A1	THAP9	-0.11705	9.84e-05	0.471993	1.31e-07	6.12098	9.3e-10	-/+
BMT2	THAP9	0.582874	0	0.860872	0	6.11785	9.48e-10	#ERROR!
LINC01588	THAP9	0.156653	1.73e-07	0.657162	2.66e-15	6.11738	9.51e-10	#ERROR!
MBLAC2	THAP9	0.640367	0	0.882853	0	6.11652	9.56e-10	#ERROR!
TPM1	THAP9	0.166778	2.56e-08	0.662713	1.33e-15	6.11191	9.84e-10	#ERROR!
C1orf116	THAP9	0.056855	0.059193	0.595512	3.47e-12	6.11155	9.87e-10	0/+
SLC15A2	THAP9	0.120199	6.33e-05	0.635066	4.22e-14	6.10989	9.97e-10	#ERROR!
ARGLU1	THAP9	0.361278	0	0.764696	0	6.10984	9.97e-10	#ERROR!
FANCM	THAP9	0.630988	0	0.879164	0	6.10934	1e-09	#ERROR!
FNDC3A	THAP9	0.500293	0	0.827036	0	6.10899	1e-09	#ERROR!
HOXA4	THAP9	0.036904	0.220917	0.582232	1.34e-11	6.10828	1.01e-09	0/+
AIFM2	THAP9	0.194168	8.01e-11	-0.40708	7.66e-06	-6.10694	1.02e-09	#ERROR!
TCAF2	THAP9	0.326078	0	0.747457	0	6.10655	1.02e-09	#ERROR!
PRUNE1	THAP9	0.575046	0	0.857417	0	6.10407	1.03e-09	#ERROR!
TTC28-AS1	THAP9	0.413897	0	0.788971	0	6.10327	1.04e-09	#ERROR!
FAM161B	THAP9	0.409875	0	0.787105	0	6.10249	1.04e-09	#ERROR!
MED6	THAP9	0.489383	0	0.822187	0	6.10217	1.05e-09	#ERROR!
GP1BA	THAP9	0.189526	2.27e-10	0.675099	2.22e-16	6.10145	1.05e-09	#ERROR!
CPA4	THAP9	0.038719	0.199017	0.582921	1.25e-11	6.10076	1.06e-09	0/+
ERBB4	THAP9	0.324578	0	0.74632	0	6.09787	1.07e-09	#ERROR!
FASTKD3	THAP9	0.660613	0	0.889955	0	6.09755	1.08e-09	#ERROR!
SACS-AS1	THAP9	0.05335	0.07668	0.59229	4.85e-12	6.09734	1.08e-09	0/+
POLR2J4	THAP9	0.29457	0	0.731216	0	6.09721	1.08e-09	#ERROR!
GBP7	THAP9	0.241748	4.44e-16	0.703419	0	6.09365	1.1e-09	#ERROR!
ARMCX4	THAP9	0.238969	8.88e-16	0.701923	0	6.09361	1.1e-09	#ERROR!
PKP4-AS1	THAP9	0.234751	2.89e-15	0.69964	0	6.09343	1.11e-09	#ERROR!
SLC22A1	THAP9	0.022415	0.457277	0.57148	3.83e-11	6.09262	1.11e-09	0/+
RASSF6	THAP9	0.277296	0	0.721847	0	6.08719	1.15e-09	#ERROR!
LINC00662	THAP9	0.437637	0	0.799063	0	6.08689	1.15e-09	#ERROR!
ACO1	THAP9	0.319915	0	-0.28674	0.002076	-6.08549	1.16e-09	#ERROR!
SLC9A7P1	THAP9	0.2872	0	0.726759	0	6.08302	1.18e-09	#ERROR!
SGCZ	THAP9	0.03984	0.18631	0.582456	1.31e-11	6.08301	1.18e-09	0/+
DARS1-AS1	THAP9	0.186228	4.67e-10	0.672016	4.44e-16	6.07984	1.2e-09	#ERROR!
TCERG1	THAP9	0.64394	0	0.883313	0	6.07776	1.22e-09	#ERROR!
C20orf203	THAP9	0.077708	0.009863	0.606669	1.06e-12	6.07775	1.22e-09	#ERROR!
DIPK2A	THAP9	0.358767	0	0.762004	0	6.07519	1.24e-09	#ERROR!
KCNAB3	THAP9	0.087297	0.003729	0.612475	5.64e-13	6.07371	1.25e-09	#ERROR!
PPP2R2B	THAP9	0.083832	0.005358	0.61004	7.37e-13	6.06985	1.28e-09	#ERROR!
DNAH14	THAP9	0.412778	0	0.787086	0	6.06806	1.29e-09	#ERROR!
SLC9A7	THAP9	0.383997	0	0.773688	0	6.06747	1.3e-09	#ERROR!
FBXO36	THAP9	0.393272	0	0.777969	0	6.06583	1.31e-09	#ERROR!
EML4	THAP9	0.496449	0	0.823946	0	6.06445	1.32e-09	#ERROR!
FAH	THAP9	0.161215	7.41e-08	-0.43134	1.85e-06	-6.06223	1.34e-09	#ERROR!
HOXA-AS3	THAP9	0.038188	0.205247	0.579814	1.7e-11	6.06034	1.36e-09	0/+
DNAH12	THAP9	0.224043	5.28e-14	0.692047	0	6.06023	1.36e-09	#ERROR!
ANKRD40	THAP9	0.638049	0	0.130217	0.169225	-6.05974	1.36e-09	#ERROR!
CCDC138	THAP9	0.530134	0	0.837853	0	6.05661	1.39e-09	#ERROR!
TUBD1	THAP9	0.55817	0	0.849291	0	6.05506	1.4e-09	#ERROR!
HOXA2	THAP9	0.016593	0.582143	0.564846	7.18e-11	6.05403	1.41e-09	0/+
SGIP1	THAP9	0.189954	2.06e-10	0.672662	4.44e-16	6.05377	1.41e-09	#ERROR!
ANKMY1	THAP9	0.223272	6.46e-14	0.691217	0	6.05266	1.42e-09	#ERROR!
KMT5B	THAP9	0.687247	0	0.898785	0	6.05226	1.43e-09	#ERROR!
PRKCI	THAP9	0.621961	0	0.874289	0	6.04893	1.46e-09	#ERROR!
LOC101927751	THAP9	0.117205	9.63e-05	0.629474	8.17e-14	6.0489	1.46e-09	#ERROR!
PHYHIPL	THAP9	0.065804	0.028937	0.597133	2.93e-12	6.04872	1.46e-09	#ERROR!
RBM18	THAP9	0.641067	0	0.881521	0	6.04663	1.48e-09	#ERROR!
CARNMT1	THAP9	0.630704	0	0.87754	0	6.04486	1.5e-09	#ERROR!
AK9	THAP9	0.524379	0	0.83506	0	6.04372	1.51e-09	#ERROR!
KCNJ14	THAP9	0.156534	1.76e-07	0.652569	4.88e-15	6.04047	1.54e-09	#ERROR!
SNX30	THAP9	0.512052	0	0.829764	0	6.03989	1.54e-09	#ERROR!
COL27A1	THAP9	0.098242	0.001093	0.617002	3.41e-13	6.03716	1.57e-09	#ERROR!
NXN	THAP9	-0.063	0.036513	0.506801	1.02e-08	6.03631	1.58e-09	-/+
TCEAL7	THAP9	0.118699	7.82e-05	0.629565	8.08e-14	6.03565	1.58e-09	#ERROR!
CRNKL1	THAP9	0.629503	0	0.876846	0	6.03497	1.59e-09	#ERROR!
FFAR2	THAP9	0.170086	1.34e-08	-0.42147	3.34e-06	-6.03367	1.6e-09	#ERROR!
MMACHC	THAP9	0.500801	0	0.824785	0	6.03365	1.6e-09	#ERROR!
TGM5	THAP9	-0.00556	0.853765	0.547994	3.34e-10	6.0321	1.62e-09	0/+
DCST2	THAP9	0.095936	0.00143	0.615191	4.17e-13	6.03142	1.63e-09	#ERROR!
SORBS2	THAP9	0.28177	0	0.721388	0	6.03076	1.63e-09	#ERROR!
CAPS2	THAP9	0.481929	0	0.816557	0	6.03049	1.63e-09	#ERROR!
ESYT1	THAP9	0.421233	0	-0.16999	0.071858	-6.02991	1.64e-09	#ERROR!
KDM4D	THAP9	0.369913	0	0.765287	0	6.02687	1.67e-09	#ERROR!
KCNAB1-AS1	THAP9	0.059041	0.05006	0.591261	5.39e-12	6.0265	1.68e-09	0/+
ATP8B1	THAP9	0.461033	0	0.807178	0	6.02419	1.7e-09	#ERROR!
CACNB4	THAP9	0.257451	0	0.708148	0	6.02252	1.72e-09	#ERROR!
TTC23L	THAP9	0.33202	0	0.746548	0	6.02186	1.72e-09	#ERROR!
PSMC1P9	THAP9	0.144371	1.49e-06	0.644183	1.38e-14	6.02078	1.74e-09	#ERROR!
ANKRD13A	THAP9	0.565067	0	0.851081	0	6.01994	1.74e-09	#ERROR!
SIM2	THAP9	0.164504	3.97e-08	0.656031	3.11e-15	6.0198	1.75e-09	#ERROR!
MYO1C	THAP9	0.250779	0	-0.34829	0.000157	-6.01925	1.75e-09	#ERROR!
GCSAM	THAP9	0.255916	0	0.707074	0	6.0176	1.77e-09	#ERROR!
LINC00707	THAP9	0.051694	0.086296	0.585839	9.35e-12	6.01752	1.77e-09	0/+
TSPAN3	THAP9	0.380383	0	-0.21554	0.021861	-6.0167	1.78e-09	#ERROR!
FAM86B3P	THAP9	0.283255	0	0.721339	0	6.01409	1.81e-09	#ERROR!
METTL16	THAP9	0.578604	0	0.856352	0	6.01336	1.82e-09	#ERROR!
FAM24B	THAP9	0.227219	2.26e-14	0.691141	0	6.01086	1.85e-09	#ERROR!
CAMK4	THAP9	0.233627	4e-15	0.69465	0	6.01069	1.85e-09	#ERROR!
HOTAIRM1	THAP9	-0.08781	0.003532	0.48598	4.85e-08	6.01025	1.85e-09	-/+
SLMAP	THAP9	0.58682	0	0.859528	0	6.00943	1.86e-09	#ERROR!
TUSC8	THAP9	0.06989	0.020325	0.596951	2.99e-12	6.00611	1.9e-09	#ERROR!
CCDC30	THAP9	0.466509	0	0.808914	0	6.00503	1.91e-09	#ERROR!
CERS3	THAP9	0.122464	4.58e-05	0.629846	7.82e-14	6.00307	1.94e-09	#ERROR!
ST6GAL2	THAP9	0.190573	1.8e-10	0.670099	4.44e-16	6.00222	1.95e-09	#ERROR!
PLPP5	THAP9	0.340794	0	0.749926	0	6.00032	1.97e-09	#ERROR!
TMBIM1	THAP9	0.311441	0	-0.28729	0.002034	-5.99984	1.98e-09	#ERROR!
BZW2	THAP9	0.34585	0	0.752368	0	5.99906	1.98e-09	#ERROR!
KIAA0825	THAP9	0.428209	0	0.791378	0	5.99655	2.02e-09	#ERROR!
IRAK1BP1	THAP9	0.564276	0	0.850076	0	5.99592	2.02e-09	#ERROR!
ELMOD3	THAP9	0.351795	0	-0.24465	0.009012	-5.9946	2.04e-09	#ERROR!
APOBEC3F	THAP9	0.228004	1.84e-14	0.690695	0	5.99453	2.04e-09	#ERROR!
ANKDD1B	THAP9	0.184014	7.54e-10	0.665891	8.88e-16	5.99443	2.04e-09	#ERROR!
LINC01266	THAP9	0.106789	0.000384	0.619597	2.54e-13	5.99407	2.05e-09	#ERROR!
GPR75	THAP9	0.461158	0	0.80614	0	5.9938	2.05e-09	#ERROR!
NOXRED1	THAP9	0.386137	0	0.771634	0	5.99357	2.05e-09	#ERROR!
EFCAB11	THAP9	0.445078	0	0.798915	0	5.99318	2.06e-09	#ERROR!
MACC1	THAP9	0.250847	0	0.70304	0	5.9923	2.07e-09	#ERROR!
ANXA5	THAP9	0.38792	0	-0.20462	0.0297	-5.99165	2.08e-09	#ERROR!
NBEA	THAP9	0.388119	0	0.77244	0	5.9903	2.09e-09	#ERROR!
DMC1	THAP9	0.289039	0	0.722992	0	5.98645	2.14e-09	#ERROR!
C5orf22	THAP9	0.653749	0	0.884924	0	5.98488	2.17e-09	#ERROR!
MUC15	THAP9	0.027923	0.354406	0.56766	5.51e-11	5.98416	2.18e-09	0/+
PNPLA2	THAP9	0.121843	5.01e-05	-0.4571	3.59e-07	-5.98379	2.18e-09	#ERROR!
SLC35E3	THAP9	0.631327	0	0.876299	0	5.98262	2.2e-09	#ERROR!
RASSF10-DT	THAP9	0.254702	0	0.70455	0	5.98137	2.21e-09	#ERROR!
TMEM144	THAP9	0.476442	0	0.812401	0	5.97976	2.23e-09	#ERROR!
RAB38	THAP9	0.15385	2.87e-07	0.647341	9.33e-15	5.97925	2.24e-09	#ERROR!
ECT2L	THAP9	0.281057	0	0.718452	0	5.97908	2.24e-09	#ERROR!
SLC33A1	THAP9	0.575414	0	0.854092	0	5.9781	2.26e-09	#ERROR!
RAB9B	THAP9	0.417705	0	0.785811	0	5.97778	2.26e-09	#ERROR!
MYLK	THAP9	0.234196	3.55e-15	0.692959	0	5.97318	2.33e-09	#ERROR!
ARHGAP26	THAP9	0.2263	2.89e-14	0.688593	0	5.97305	2.33e-09	#ERROR!
LINC01524	THAP9	0.100669	0.000818	0.614334	4.59e-13	5.97163	2.35e-09	#ERROR!
TSPYL4	THAP9	0.540987	0	0.839757	0	5.97121	2.35e-09	#ERROR!
IL22RA2	THAP9	-0.01521	0.613968	0.536526	9.06e-10	5.96809	2.4e-09	0/+
NEPRO	THAP9	0.664094	0	0.888436	0	5.96685	2.42e-09	#ERROR!
NARS2	THAP9	0.503639	0	0.823773	0	5.96612	2.43e-09	#ERROR!
TMPO	THAP9	0.590337	0	0.859706	0	5.96377	2.46e-09	#ERROR!
CAPZA3	THAP9	0.044754	0.13762	0.57749	2.14e-11	5.96252	2.48e-09	0/+
BIVM	THAP9	0.35683	0	0.756114	0	5.96179	2.49e-09	#ERROR!
KIF13B	THAP9	0.229739	1.15e-14	0.689879	0	5.96161	2.5e-09	#ERROR!
NOL4	THAP9	0.096002	0.001419	0.610723	6.84e-13	5.96126	2.5e-09	#ERROR!
IL1RAPL2	THAP9	0.098984	0.001001	0.612599	5.57e-13	5.96114	2.5e-09	#ERROR!
POLR1F	THAP9	0.605014	0	0.865429	0	5.95916	2.54e-09	#ERROR!
MPP7	THAP9	0.393522	0	0.773666	0	5.95797	2.55e-09	#ERROR!
ANXA6	THAP9	0.264551	0	-0.32964	0.000363	-5.9578	2.56e-09	#ERROR!
MDH1B	THAP9	0.299767	0	0.727155	0	5.95762	2.56e-09	#ERROR!
GFM2	THAP9	0.578848	0	0.854911	0	5.95755	2.56e-09	#ERROR!
RPS26P49	THAP9	0.112811	0.000175	0.620931	2.19e-13	5.95592	2.59e-09	#ERROR!
BEND5	THAP9	0.098955	0.001004	0.612024	5.93e-13	5.95248	2.64e-09	#ERROR!
ITGB1BP1	THAP9	0.29259	0	-0.30163	0.001167	-5.95094	2.67e-09	#ERROR!
GMPS	THAP9	0.536485	0	0.837191	0	5.94889	2.7e-09	#ERROR!
KPNA5	THAP9	0.594152	0	0.860827	0	5.9486	2.7e-09	#ERROR!
ATP9A	THAP9	0.600063	0	0.080733	0.395299	-5.94729	2.73e-09	#ERROR!
LOC105369201	THAP9	0.135785	6.09e-06	0.634438	4.53e-14	5.94579	2.75e-09	#ERROR!
PCOLCE-AS1	THAP9	0.06781	0.024381	0.591533	5.24e-12	5.94507	2.76e-09	#ERROR!
FBXO25	THAP9	0.461915	0	0.804666	0	5.9437	2.79e-09	#ERROR!
COG2	THAP9	0.482832	0	0.813884	0	5.94165	2.82e-09	#ERROR!
FRAS1	THAP9	0.219151	1.89e-13	0.682816	0	5.94021	2.85e-09	#ERROR!
GNAZ	THAP9	0.316555	0	-0.27641	0.003041	-5.94018	2.85e-09	#ERROR!
PCDHGB5	THAP9	0.126249	2.63e-05	0.62818	9.5e-14	5.93896	2.87e-09	#ERROR!
APPL1	THAP9	0.658959	0	0.885866	0	5.93834	2.88e-09	#ERROR!
ENPP5	THAP9	0.303479	0	0.728124	0	5.93797	2.89e-09	#ERROR!
DLEU1	THAP9	0.338689	0	0.745984	0	5.93653	2.91e-09	#ERROR!
HCG18	THAP9	0.579301	0	0.854488	0	5.93569	2.93e-09	#ERROR!
NAE1	THAP9	0.511741	0	0.826258	0	5.93567	2.93e-09	#ERROR!
CYB5R2	THAP9	0.09541	0.00152	0.608598	8.63e-13	5.93421	2.95e-09	#ERROR!
ESCO1	THAP9	0.714912	0	0.906605	0	5.93393	2.96e-09	#ERROR!
SCGB2B2	THAP9	0.343948	0	0.748441	0	5.93272	2.98e-09	#ERROR!
MEF2C-AS1	THAP9	0.054773	0.069128	0.582059	1.36e-11	5.93181	3e-09	0/+
COX11	THAP9	0.621058	0	0.871053	0	5.9314	3e-09	#ERROR!
CEP128	THAP9	0.442183	0	0.795266	0	5.93099	3.01e-09	#ERROR!
TNFSF10	THAP9	0.224175	5.11e-14	0.685087	0	5.93033	3.02e-09	#ERROR!
SLF1	THAP9	0.598672	0	0.862133	0	5.92964	3.04e-09	#ERROR!
AGPAT5	THAP9	0.47309	0	0.809139	0	5.92933	3.04e-09	#ERROR!
AQP4-AS1	THAP9	0.189686	2.19e-10	0.665401	8.88e-16	5.9288	3.05e-09	#ERROR!
ASAH2B	THAP9	0.481713	0	0.812895	0	5.92745	3.08e-09	#ERROR!
KIAA0753	THAP9	0.575456	0	0.852665	0	5.92647	3.1e-09	#ERROR!
PLCH1	THAP9	0.203575	8.99e-12	0.673172	4.44e-16	5.9252	3.12e-09	#ERROR!
ATL2	THAP9	0.555462	0	0.844305	0	5.92202	3.18e-09	#ERROR!
ATP13A4	THAP9	0.009571	0.750951	0.550628	2.64e-10	5.92178	3.18e-09	0/+
TNS4	THAP9	0.082598	0.006078	0.599486	2.29e-12	5.92031	3.21e-09	#ERROR!
NTN5	THAP9	0.010607	0.725039	0.551163	2.52e-10	5.91918	3.24e-09	0/+
TANC1	THAP9	0.451911	0	0.799253	0	5.91918	3.24e-09	#ERROR!
NAV2	THAP9	0.327565	0	0.739528	0	5.91819	3.26e-09	#ERROR!
ARHGEF38-IT1	THAP9	-0.0104	0.730254	0.536256	9.27e-10	5.91763	3.27e-09	0/+
POGZ	THAP9	0.596153	0	0.860802	0	5.91755	3.27e-09	#ERROR!
ADGRV1	THAP9	0.236806	1.78e-15	0.691325	0	5.91589	3.3e-09	#ERROR!
SPART-AS1	THAP9	0.162653	5.65e-08	0.648725	7.99e-15	5.91472	3.32e-09	#ERROR!
CGB7	THAP9	-0.03633	0.228233	0.517292	4.45e-09	5.91467	3.33e-09	0/+
PLS1	THAP9	0.417056	0	0.782982	0	5.914	3.34e-09	#ERROR!
NDC1	THAP9	0.556098	0	0.844241	0	5.91091	3.4e-09	#ERROR!
ADAT2	THAP9	0.318011	0	0.734239	0	5.90935	3.43e-09	#ERROR!
RAD54B	THAP9	0.475196	0	0.809301	0	5.90749	3.47e-09	#ERROR!
CPM	THAP9	0.305555	0	-0.28437	0.002269	-5.90579	3.51e-09	#ERROR!
PCDHB4	THAP9	0.182709	9.97e-10	0.659987	1.78e-15	5.90524	3.52e-09	#ERROR!
LSM11	THAP9	0.593333	0	0.859318	0	5.90458	3.54e-09	#ERROR!
ARID1B	THAP9	0.616992	0	0.868772	0	5.90439	3.54e-09	#ERROR!
FAM13B	THAP9	0.622128	0	0.870769	0	5.90304	3.57e-09	#ERROR!
ATP2B1-AS1	THAP9	0.285235	0	0.716716	0	5.9002	3.63e-09	#ERROR!
TRIT1	THAP9	0.465257	0	0.804576	0	5.89988	3.64e-09	#ERROR!
CTBP2	THAP9	0.457432	0	0.801	0	5.89872	3.66e-09	#ERROR!
MAP3K4	THAP9	0.534725	0	0.834888	0	5.89855	3.67e-09	#ERROR!
BACH1	THAP9	0.459395	0	0.801866	0	5.89813	3.68e-09	#ERROR!
KLHL9	THAP9	0.617045	0	0.868618	0	5.89744	3.69e-09	#ERROR!
ALG13	THAP9	0.528983	0	0.832404	0	5.89723	3.7e-09	#ERROR!
RDH13	THAP9	0.276814	0	0.712019	0	5.89584	3.73e-09	#ERROR!
ENKUR	THAP9	0.180993	1.43e-09	0.658419	2.22e-15	5.89553	3.73e-09	#ERROR!
IL7	THAP9	0.209809	1.99e-12	0.674998	2.22e-16	5.89446	3.76e-09	#ERROR!
CEP83	THAP9	0.605972	0	0.864129	0	5.89438	3.76e-09	#ERROR!
IQCK	THAP9	0.47174	0	0.807275	0	5.89399	3.77e-09	#ERROR!
SCAPER	THAP9	0.603242	0	0.863003	0	5.89319	3.79e-09	#ERROR!
CS	THAP9	0.564595	0	0.032862	0.72969	-5.89234	3.81e-09	#ERROR!
GCNT4	THAP9	0.323537	0	0.736214	0	5.89129	3.83e-09	#ERROR!
TM4SF1	THAP9	0.117903	8.74e-05	0.619937	2.45e-13	5.89011	3.86e-09	#ERROR!
NFRKB	THAP9	0.486484	0	0.813696	0	5.8899	3.86e-09	#ERROR!
INTS6-AS1	THAP9	0.284158	0	0.715617	0	5.88967	3.87e-09	#ERROR!
MAML3	THAP9	0.443194	0	0.79415	0	5.88937	3.88e-09	#ERROR!
ARFGAP3	THAP9	0.351364	0	0.750114	0	5.88785	3.91e-09	#ERROR!
HSD17B7P2	THAP9	0.237996	1.33e-15	0.690356	0	5.88562	3.97e-09	#ERROR!
TSPAN6	THAP9	0.315564	0	0.731717	0	5.88284	4.03e-09	#ERROR!
NUP205	THAP9	0.572181	0	0.850051	0	5.88166	4.06e-09	#ERROR!
SPRED1	THAP9	0.361845	0	0.754885	0	5.87806	4.15e-09	#ERROR!
ACAA2	THAP9	0.362461	0	-0.22155	0.018356	-5.8761	4.2e-09	#ERROR!
GTPBP10	THAP9	0.677081	0	0.891358	0	5.874	4.25e-09	#ERROR!
DNAH7	THAP9	0.347786	0	0.747689	0	5.8738	4.26e-09	#ERROR!
PEX19	THAP9	0.544515	0	0.005864	0.950849	-5.873	4.28e-09	#ERROR!
PTPRT	THAP9	0.152711	3.51e-07	0.640162	2.26e-14	5.8715	4.32e-09	#ERROR!
PHF12	THAP9	0.533952	0	0.833648	0	5.86943	4.37e-09	#ERROR!
SYT1	THAP9	0.174445	5.57e-09	0.652938	4.66e-15	5.86784	4.42e-09	#ERROR!
LNX2	THAP9	0.527074	0	0.83063	0	5.8671	4.43e-09	#ERROR!
SLC35A3	THAP9	0.558925	0	0.844094	0	5.86608	4.46e-09	#ERROR!
CACNA1C-AS1	THAP9	0.056851	0.05921	0.578821	1.88e-11	5.86415	4.51e-09	0/+
FAM221A	THAP9	0.357955	0	0.752244	0	5.86211	4.57e-09	#ERROR!
PRDM10	THAP9	0.676499	0	0.890881	0	5.86195	4.57e-09	#ERROR!
EXTL3-AS1	THAP9	0.275875	0	0.709765	0	5.86145	4.59e-09	#ERROR!
SCHIP1	THAP9	0.204561	7.1e-12	0.670007	4.44e-16	5.85922	4.65e-09	#ERROR!
LCOR	THAP9	0.650732	0	0.880903	0	5.85872	4.66e-09	#ERROR!
PCAT5	THAP9	-0.00529	0.860688	0.535534	9.86e-10	5.85821	4.68e-09	0/+
TGFA	THAP9	0.189257	2.41e-10	0.660928	1.78e-15	5.85557	4.75e-09	#ERROR!
KANSL2	THAP9	0.67061	0	0.888496	0	5.85551	4.76e-09	#ERROR!
KIAA1671-AS1	THAP9	0.368388	0	0.757097	0	5.85489	4.77e-09	#ERROR!
HSPA12A	THAP9	0.343473	0	-0.24001	0.010451	-5.85479	4.78e-09	#ERROR!
NPAT	THAP9	0.614143	0	0.866293	0	5.85157	4.87e-09	#ERROR!
TMPRSS12	THAP9	0.084456	0.005024	0.596129	3.26e-12	5.85139	4.87e-09	#ERROR!
C19orf12	THAP9	0.384324	0	-0.1948	0.038678	-5.85124	4.88e-09	#ERROR!
KLHL7	THAP9	0.531016	0	0.831772	0	5.84982	4.92e-09	#ERROR!
TTC8	THAP9	0.449873	0	0.795693	0	5.84904	4.94e-09	#ERROR!
PRSS45P	THAP9	0.140177	2.99e-06	0.630995	6.84e-14	5.84653	5.02e-09	#ERROR!
HOMER2	THAP9	0.376146	0	0.760464	0	5.84448	5.08e-09	#ERROR!
POC1B	THAP9	0.60414	0	0.862033	0	5.84267	5.14e-09	#ERROR!
GAL3ST1	THAP9	-0.05482	0.068904	0.497872	2.01e-08	5.84055	5.2e-09	0/+
PEX3	THAP9	0.544277	0	0.83714	0	5.84033	5.21e-09	#ERROR!
SCN2A	THAP9	0.168237	1.93e-08	0.647604	9.1e-15	5.84019	5.21e-09	#ERROR!
L3MBTL1	THAP9	0.284768	0	0.713424	0	5.83971	5.23e-09	#ERROR!
CAMTA1	THAP9	0.343853	0	0.744063	0	5.83782	5.29e-09	#ERROR!
KRT86	THAP9	-0.04152	0.168453	0.507551	9.61e-09	5.83684	5.32e-09	0/+
GNS	THAP9	0.543204	0	0.007939	0.93349	-5.83477	5.39e-09	#ERROR!
ELF5	THAP9	0.096618	0.001322	0.602862	1.6e-12	5.83437	5.4e-09	#ERROR!
TXNL4B	THAP9	0.385545	0	0.764518	0	5.83177	5.48e-09	#ERROR!
DANT2	THAP9	0.267108	0	0.703462	0	5.83111	5.51e-09	#ERROR!
CD226	THAP9	0.217676	2.76e-13	0.675929	2.22e-16	5.83102	5.51e-09	#ERROR!
GRHL1	THAP9	0.378569	0	0.761049	0	5.83053	5.53e-09	#ERROR!
GOPC	THAP9	0.623499	0	0.869454	0	5.82873	5.59e-09	#ERROR!
FLJ31356	THAP9	0.179788	1.85e-09	0.653709	4.22e-15	5.82733	5.63e-09	#ERROR!
EIF3J-DT	THAP9	0.479661	0	0.808372	0	5.82523	5.7e-09	#ERROR!
ARL4A	THAP9	0.177751	2.83e-09	0.652357	4.88e-15	5.82488	5.72e-09	#ERROR!
TMEM260	THAP9	0.582249	0	0.852592	0	5.82466	5.72e-09	#ERROR!
LZTS1-AS1	THAP9	-0.01758	0.559906	0.52401	2.58e-09	5.82197	5.82e-09	0/+
MIR31HG	THAP9	-0.00357	0.905825	0.534056	1.12e-09	5.82136	5.84e-09	0/+
NME5	THAP9	0.241276	4.44e-16	0.688689	0	5.82096	5.85e-09	#ERROR!
ATP2B1	THAP9	0.524486	0	0.828016	0	5.82054	5.87e-09	#ERROR!
RAD9B	THAP9	0.51261	0	0.822815	0	5.81979	5.89e-09	#ERROR!
NEK7	THAP9	0.602375	0	0.097359	0.30495	-5.81968	5.9e-09	#ERROR!
TRAF5	THAP9	0.359609	0	0.751121	0	5.8186	5.93e-09	#ERROR!
SPAG16	THAP9	0.302521	0	0.721719	0	5.8171	5.99e-09	#ERROR!
MED17	THAP9	0.579965	0	0.851341	0	5.81382	6.11e-09	#ERROR!
INTS6	THAP9	0.523693	0	0.827438	0	5.8133	6.13e-09	#ERROR!
MDM1	THAP9	0.637967	0	0.87482	0	5.81309	6.13e-09	#ERROR!
MSL2	THAP9	0.695245	0	0.896981	0	5.81303	6.14e-09	#ERROR!
NTF4	THAP9	-0.05827	0.053152	0.492828	2.94e-08	5.80923	6.28e-09	0/+
DLGAP1-AS5	THAP9	0.106462	0.0004	0.607507	9.72e-13	5.80896	6.29e-09	#ERROR!
CCDC191	THAP9	0.436694	0	0.788031	0	5.8088	6.29e-09	#ERROR!
EIF3L	THAP9	0.41395	0	0.777273	0	5.80878	6.29e-09	#ERROR!
PAXBP1-AS1	THAP9	0.458718	0	0.798239	0	5.80857	6.3e-09	#ERROR!
BCOR	THAP9	0.509723	0	0.821156	0	5.80806	6.32e-09	#ERROR!
STX18-AS1	THAP9	0.549945	0	0.838549	0	5.80767	6.33e-09	#ERROR!
GSAP	THAP9	0.487793	0	0.811395	0	5.80744	6.34e-09	#ERROR!
NDFIP2	THAP9	0.506367	0	0.819618	0	5.80632	6.39e-09	#ERROR!
ROPN1	THAP9	0.018011	0.550321	0.54819	3.28e-10	5.80588	6.4e-09	0/+
PERP	THAP9	0.23998	6.66e-16	0.687037	0	5.80387	6.48e-09	#ERROR!
ASB4	THAP9	0.113899	0.000151	0.611898	6.01e-13	5.80373	6.49e-09	#ERROR!
GTF3C4	THAP9	0.654019	0	0.880866	0	5.80153	6.57e-09	#ERROR!
EOGT	THAP9	0.352521	0	0.746766	0	5.8011	6.59e-09	#ERROR!
FGD6	THAP9	0.417815	0	0.7788	0	5.80097	6.59e-09	#ERROR!
DIRAS2	THAP9	0.150549	5.15e-07	0.634358	4.57e-14	5.79808	6.71e-09	#ERROR!
LOC105370792	THAP9	0.001679	0.955605	0.536061	9.42e-10	5.79769	6.72e-09	0/+
CCDC66	THAP9	0.572468	0	0.847752	0	5.79756	6.73e-09	#ERROR!
PYGO1	THAP9	0.326234	0	0.733117	0	5.79666	6.77e-09	#ERROR!
RBAK	THAP9	0.666919	0	0.885725	0	5.79403	6.87e-09	#ERROR!
TASP1	THAP9	0.556535	0	0.840928	0	5.7938	6.88e-09	#ERROR!
DNAH6	THAP9	0.226404	2.82e-14	0.678753	0	5.79253	6.93e-09	#ERROR!
CKAP2LP1	THAP9	0.116108	0.000112	0.612479	5.64e-13	5.791	7e-09	#ERROR!
DOK1	THAP9	0.080815	0.007272	-0.474	1.14e-07	-5.79068	7.01e-09	#ERROR!
HSD17B3	THAP9	0.060639	0.044161	0.576285	2.41e-11	5.79026	7.03e-09	#ERROR!
DTWD2	THAP9	0.527637	0	0.828394	0	5.78991	7.04e-09	#ERROR!
FAM221B	THAP9	0.161018	7.69e-08	0.640005	2.31e-14	5.78621	7.2e-09	#ERROR!
MAP2K1	THAP9	0.51957	0	-0.01983	0.83487	-5.78457	7.27e-09	#ERROR!
HSDL2	THAP9	0.500075	0	-0.04614	0.627503	-5.7845	7.27e-09	#ERROR!
MIR99AHG	THAP9	0.050779	0.09202	0.569127	4.8e-11	5.78287	7.34e-09	0/+
CCNB1IP1	THAP9	0.311476	0	0.724729	0	5.78237	7.37e-09	#ERROR!
TP53AIP1	THAP9	-0.02818	0.349974	0.513207	6.16e-09	5.78146	7.41e-09	0/+
LINC00862	THAP9	0.060273	0.045458	0.575399	2.62e-11	5.78097	7.43e-09	#ERROR!
MIS18A	THAP9	0.386677	0	0.762831	0	5.77955	7.49e-09	#ERROR!
PLA2R1	THAP9	0.344609	0	0.741754	0	5.77944	7.49e-09	#ERROR!
CA8	THAP9	0.287564	0	0.711791	0	5.77791	7.56e-09	#ERROR!
LINC00327	THAP9	0.1069	0.000378	0.605575	1.2e-12	5.77496	7.7e-09	#ERROR!
TALDO1	THAP9	0.190116	1.99e-10	-0.38173	3.02e-05	-5.77441	7.72e-09	#ERROR!
MTHFSD	THAP9	0.32015	0	0.728617	0	5.76881	7.98e-09	#ERROR!
MTM1	THAP9	0.556699	0	0.840183	0	5.76687	8.08e-09	#ERROR!
ENTPD4	THAP9	0.400127	0	0.768835	0	5.76602	8.12e-09	#ERROR!
LOC105373159	THAP9	0.461557	0	0.797874	0	5.76383	8.22e-09	#ERROR!
CNDP1	THAP9	0.139246	3.49e-06	0.625225	1.34e-13	5.76319	8.25e-09	#ERROR!
CCNJ	THAP9	0.566223	0	0.84406	0	5.76124	8.35e-09	#ERROR!
HEATR4	THAP9	0.312462	0	0.724188	0	5.76068	8.38e-09	#ERROR!
GNB5	THAP9	0.32563	0	0.731007	0	5.75903	8.46e-09	#ERROR!
MDH1	THAP9	0.481555	0	-0.06779	0.475602	-5.7585	8.49e-09	#ERROR!
LINC02188	THAP9	0.050313	0.095042	0.566977	5.88e-11	5.75657	8.58e-09	0/+
LOC101928438	THAP9	0.234772	2.89e-15	0.681507	0	5.75645	8.59e-09	#ERROR!
MED14	THAP9	0.653571	0	0.879643	0	5.75638	8.59e-09	#ERROR!
BEX4	THAP9	0.224373	4.84e-14	0.6755	2.22e-16	5.75496	8.67e-09	#ERROR!
RAD18	THAP9	0.597197	0	0.856832	0	5.75487	8.67e-09	#ERROR!
DHX36	THAP9	0.644754	0	0.876101	0	5.75439	8.7e-09	#ERROR!
MNS1	THAP9	0.391332	0	0.763852	0	5.75003	8.92e-09	#ERROR!
FAM167A	THAP9	0.204747	6.79e-12	0.663805	1.11e-15	5.74883	8.99e-09	#ERROR!
ST6GALNAC6	THAP9	0.165509	3.27e-08	-0.40094	1.08e-05	-5.74802	9.03e-09	#ERROR!
DUSP28	THAP9	0.467454	0	0.79999	0	5.74761	9.05e-09	#ERROR!
FAM122A	THAP9	0.620094	0	0.865994	0	5.74661	9.11e-09	#ERROR!
MAGI3	THAP9	0.444998	0	0.789443	0	5.74497	9.19e-09	#ERROR!
LINCR-0001	THAP9	0.043643	0.147667	0.561517	9.8e-11	5.74371	9.26e-09	0/+
SVOPL	THAP9	0.056937	0.058828	0.570516	4.2e-11	5.74287	9.31e-09	0/+
ANKRD62P1	THAP9	0.184272	7.14e-10	0.651343	5.77e-15	5.74226	9.34e-09	#ERROR!
PPFIBP2	THAP9	0.318081	0	0.726178	0	5.74087	9.42e-09	#ERROR!
TSC22D1-AS1	THAP9	0.130243	1.44e-05	0.61803	3.04e-13	5.73835	9.56e-09	#ERROR!
SLC27A6	THAP9	0.181436	1.31e-09	0.64941	7.11e-15	5.73822	9.57e-09	#ERROR!
OR5P3	THAP9	0.020413	0.498453	0.544917	4.38e-10	5.73722	9.62e-09	0/+
PRDM11	THAP9	0.432134	0	0.783053	0	5.73711	9.63e-09	#ERROR!
RELCH	THAP9	0.636279	0	0.872255	0	5.73555	9.72e-09	#ERROR!
SAV1	THAP9	0.541634	0	0.832712	0	5.73475	9.77e-09	#ERROR!
RSBN1L	THAP9	0.72355	0	0.906138	0	5.73471	9.77e-09	#ERROR!
CDKL5	THAP9	0.467658	0	0.799465	0	5.73092	9.99e-09	#ERROR!
PRIM1	THAP9	0.596855	0	0.856018	0	5.73039	1e-08	#ERROR!
GPR199P	THAP9	0.250948	0	0.689196	0	5.73035	1e-08	#ERROR!
AGBL3	THAP9	0.29444	0	0.713063	0	5.73003	1e-08	#ERROR!
MCMDC2	THAP9	0.381278	0	0.757845	0	5.72627	1.03e-08	#ERROR!
KIAA1671	THAP9	0.505384	0	0.816364	0	5.72364	1.04e-08	#ERROR!
DGUOK-AS1	THAP9	0.103707	0.000565	0.600106	2.15e-12	5.72289	1.05e-08	#ERROR!
NUP42	THAP9	0.570271	0	0.844617	0	5.72204	1.05e-08	#ERROR!
SLC22A15	THAP9	0.3781	0	0.75605	0	5.7215	1.06e-08	#ERROR!
AK7	THAP9	0.305354	0	0.718447	0	5.72077	1.06e-08	#ERROR!
NT5C3A	THAP9	0.545131	0	0.833779	0	5.72044	1.06e-08	#ERROR!
FAS	THAP9	0.190663	1.76e-10	0.65384	4e-15	5.72017	1.06e-08	#ERROR!
C1orf146	THAP9	0.184536	6.74e-10	0.65016	6.66e-15	5.71968	1.07e-08	#ERROR!
MIPEP	THAP9	0.336547	0	0.734723	0	5.71792	1.08e-08	#ERROR!
AMPD1	THAP9	0.074004	0.014001	0.580245	1.63e-11	5.71765	1.08e-08	#ERROR!
PIGR	THAP9	-0.02443	0.41787	0.51111	7.27e-09	5.71737	1.08e-08	0/+
CATSPERG	THAP9	0.212006	1.15e-12	0.666197	8.88e-16	5.71678	1.09e-08	#ERROR!
MAPK4	THAP9	0.044981	0.135632	0.560429	1.08e-10	5.71527	1.1e-08	0/+
CDCA7L	THAP9	0.374573	0	0.753909	0	5.71306	1.11e-08	#ERROR!
CDK5RAP2	THAP9	0.487808	0	0.808014	0	5.7119	1.12e-08	#ERROR!
NDRG2	THAP9	0.188079	3.12e-10	0.651788	5.33e-15	5.71147	1.12e-08	#ERROR!
LOC101929124	THAP9	0.066466	0.027357	0.574609	2.83e-11	5.7091	1.14e-08	#ERROR!
ANXA13	THAP9	-0.01101	0.715018	0.520313	3.49e-09	5.7088	1.14e-08	0/+
CSE1L	THAP9	0.555418	0	0.837862	0	5.70872	1.14e-08	#ERROR!
RNF32	THAP9	0.427048	0	0.779279	0	5.70365	1.17e-08	#ERROR!
MARCHF3	THAP9	0.319774	0	-0.25037	0.007481	-5.70321	1.18e-08	#ERROR!
GPR63	THAP9	0.33408	0	0.732736	0	5.70313	1.18e-08	#ERROR!
TAS2R15P	THAP9	0.357211	0	0.744662	0	5.70296	1.18e-08	#ERROR!
TIA1	THAP9	0.575196	0	0.846123	0	5.70212	1.18e-08	#ERROR!
TTC32	THAP9	0.467866	0	0.798474	0	5.70173	1.19e-08	#ERROR!
PIAS3	THAP9	0.426007	0	0.778683	0	5.70128	1.19e-08	#ERROR!
LINC02453	THAP9	0.2491	0	0.686577	0	5.70119	1.19e-08	#ERROR!
POGK	THAP9	0.589985	0	0.852318	0	5.70045	1.19e-08	#ERROR!
ELP2	THAP9	0.441654	0	0.786116	0	5.70022	1.2e-08	#ERROR!
BAIAP2L1	THAP9	0.268859	0	0.697516	0	5.69939	1.2e-08	#ERROR!
LOC101928659	THAP9	-0.01995	0.5082	-0.54183	5.74e-10	-5.69912	1.2e-08	0/-
DENND11	THAP9	0.541158	0	0.831375	0	5.69908	1.2e-08	#ERROR!
MIR646HG	THAP9	0.111265	0.000215	0.603395	1.51e-12	5.6987	1.21e-08	#ERROR!
MCM8	THAP9	0.547733	0	0.834218	0	5.69844	1.21e-08	#ERROR!
RLF	THAP9	0.617907	0	0.863807	0	5.69674	1.22e-08	#ERROR!
FEM1B	THAP9	0.676447	0	0.88727	0	5.69548	1.23e-08	#ERROR!
ANGEL2	THAP9	0.605118	0	0.858483	0	5.69503	1.23e-08	#ERROR!
TM4SF1-AS1	THAP9	0.110298	0.000244	0.602428	1.68e-12	5.69346	1.24e-08	#ERROR!
LOC100128398	THAP9	0.377947	0	0.754728	0	5.69332	1.25e-08	#ERROR!
MIR100HG	THAP9	0.119648	6.84e-05	0.608394	8.82e-13	5.69288	1.25e-08	#ERROR!
FNBP1L	THAP9	0.59732	0	0.855135	0	5.69137	1.26e-08	#ERROR!
CCT8P1	THAP9	0.268702	0	0.696855	0	5.68856	1.28e-08	#ERROR!
AFDN	THAP9	0.576283	0	0.846137	0	5.68677	1.29e-08	#ERROR!
RINT1	THAP9	0.611899	0	0.861057	0	5.68633	1.3e-08	#ERROR!
RGS3	THAP9	0.238485	8.88e-16	-0.32938	0.000367	-5.68472	1.31e-08	#ERROR!
SEPTIN6	THAP9	0.198769	2.79e-11	0.656518	2.89e-15	5.68391	1.32e-08	#ERROR!
TFAM	THAP9	0.697863	0	0.895362	0	5.68382	1.32e-08	#ERROR!
COL4A1	THAP9	0.223276	6.46e-14	-0.34341	0.000196	-5.6823	1.33e-08	#ERROR!
HERC6	THAP9	0.284832	0	0.705402	0	5.68217	1.33e-08	#ERROR!
INTS8	THAP9	0.560501	0	0.839212	0	5.68119	1.34e-08	#ERROR!
TMEM71	THAP9	0.113881	0.000152	0.603872	1.44e-12	5.68026	1.34e-08	#ERROR!
KRT87P	THAP9	0.030994	0.303959	0.54814	3.3e-10	5.67901	1.35e-08	0/+
PSD3	THAP9	0.279852	0	0.702502	0	5.6789	1.36e-08	#ERROR!
GPX4	THAP9	0.046468	0.123156	-0.49161	3.22e-08	-5.67868	1.36e-08	0/-
PC	THAP9	0.139275	3.47e-06	-0.41736	4.25e-06	-5.67868	1.36e-08	#ERROR!
HERC3	THAP9	0.508226	0	0.816085	0	5.67836	1.36e-08	#ERROR!
CASK	THAP9	0.493145	0	0.809238	0	5.67798	1.36e-08	#ERROR!
GPBP1	THAP9	0.668902	0	0.88387	0	5.67629	1.38e-08	#ERROR!
NSG1	THAP9	0.004582	0.879245	0.528789	1.74e-09	5.67091	1.42e-08	0/+
AKAP9	THAP9	0.551882	0	0.835162	0	5.67089	1.42e-08	#ERROR!
GNPNAT1	THAP9	0.529331	0	0.825257	0	5.67076	1.42e-08	#ERROR!
ACOX1	THAP9	0.556449	0	0.043804	0.645027	-5.67056	1.42e-08	#ERROR!
MARCHF7	THAP9	0.663877	0	0.881741	0	5.67036	1.42e-08	#ERROR!
NEO1	THAP9	0.443621	0	0.785874	0	5.67031	1.43e-08	#ERROR!
NR6A1	THAP9	0.291961	0	0.708675	0	5.67021	1.43e-08	#ERROR!
DEPDC4	THAP9	0.534798	0	0.827641	0	5.66973	1.43e-08	#ERROR!
TEX2	THAP9	0.514827	0	0.818735	0	5.6691	1.44e-08	#ERROR!
RNF152	THAP9	0.463458	0	0.795165	0	5.66837	1.44e-08	#ERROR!
TRMT10B	THAP9	0.582685	0	0.848317	0	5.66819	1.44e-08	#ERROR!
FZD3	THAP9	0.397392	0	0.763296	0	5.66738	1.45e-08	#ERROR!
GPX1	THAP9	-0.051	0.090597	-0.56117	1.01e-10	-5.66717	1.45e-08	0/-
TMF1	THAP9	0.620757	0	0.864173	0	5.66585	1.46e-08	#ERROR!
TMEM178A	THAP9	0.105312	0.000462	0.597331	2.87e-12	5.66512	1.47e-08	#ERROR!
SP140L	THAP9	0.174479	5.53e-09	0.640749	2.13e-14	5.66392	1.48e-08	#ERROR!
PPP6R3	THAP9	0.654322	0	0.877747	0	5.66282	1.49e-08	#ERROR!
COA1	THAP9	0.554246	0	0.83593	0	5.66253	1.49e-08	#ERROR!
COL4A6	THAP9	0.036736	0.223022	0.550947	2.57e-10	5.66223	1.49e-08	0/+
MAP3K13	THAP9	0.502589	0	0.812929	0	5.66083	1.51e-08	#ERROR!
INTS7	THAP9	0.520897	0	0.821158	0	5.66034	1.51e-08	#ERROR!
HSD17B2	THAP9	-0.11375	0.000154	0.43697	1.31e-06	5.65973	1.52e-08	-/+
KCNS3	THAP9	0.204458	7.28e-12	0.658453	2.22e-15	5.65943	1.52e-08	#ERROR!
COLCA2	THAP9	0.097621	0.001176	0.591887	5.05e-12	5.6588	1.52e-08	#ERROR!
SSC4D	THAP9	0.205425	5.77e-12	-0.35764	0.000101	-5.65817	1.53e-08	#ERROR!
LINC01235	THAP9	0.038345	0.203398	0.551774	2.38e-10	5.65813	1.53e-08	0/+
CDCP1	THAP9	0.261615	0	0.69125	0	5.65755	1.54e-08	#ERROR!
RNF217-AS1	THAP9	0.068652	0.02266	0.572482	3.48e-11	5.65698	1.54e-08	#ERROR!
SHISAL2A	THAP9	-0.01404	0.64152	0.514099	5.74e-09	5.65583	1.55e-08	0/+
ATXN7	THAP9	0.594636	0	0.853008	0	5.65544	1.55e-08	#ERROR!
C3orf33	THAP9	0.43122	0	0.779302	0	5.65455	1.56e-08	#ERROR!
PUS7	THAP9	0.526939	0	0.823656	0	5.65444	1.56e-08	#ERROR!
DUS4L	THAP9	0.62688	0	0.866366	0	5.65324	1.57e-08	#ERROR!
CD274	THAP9	0.238746	8.88e-16	0.678053	0	5.65321	1.57e-08	#ERROR!
DDAH1	THAP9	0.529573	0	0.82476	0	5.65238	1.58e-08	#ERROR!
CEBPA	THAP9	0.068104	0.023768	-0.47285	1.23e-07	-5.65208	1.59e-08	#ERROR!
BTNL2	THAP9	0.106538	0.000396	0.597256	2.9e-12	5.65193	1.59e-08	#ERROR!
SLC25A37	THAP9	0.145836	1.16e-06	0.622318	1.87e-13	5.65164	1.59e-08	#ERROR!
CAPN6	THAP9	0.015586	0.605257	0.535236	1.01e-09	5.65135	1.59e-08	0/+
SLC30A9	THAP9	0.723969	0	0.90473	0	5.65029	1.6e-08	#ERROR!
EPB42	THAP9	0.185363	5.64e-10	-0.37489	4.29e-05	-5.64905	1.61e-08	#ERROR!
LINC01619	THAP9	0.097046	0.001257	0.590716	5.7e-12	5.64694	1.63e-08	#ERROR!
ANKRD50	THAP9	0.537317	0	0.827994	0	5.64631	1.64e-08	#ERROR!
LIPE	THAP9	0.071813	0.017112	-0.46946	1.56e-07	-5.64597	1.64e-08	#ERROR!
ARHGAP32	THAP9	0.473104	0	0.798808	0	5.64536	1.65e-08	#ERROR!
SLC25A40	THAP9	0.692005	0	0.892248	0	5.64343	1.67e-08	#ERROR!
C4orf36	THAP9	0.599888	0	0.854838	0	5.64178	1.68e-08	#ERROR!
RSPO1	THAP9	-0.01881	0.532822	0.509502	8.25e-09	5.64164	1.68e-08	0/+
MRPS30	THAP9	0.37395	0	0.750379	0	5.64114	1.69e-08	#ERROR!
PGBD2	THAP9	0.478258	0	0.801048	0	5.64106	1.69e-08	#ERROR!
RUNX1	THAP9	0.293615	0	0.708039	0	5.64024	1.7e-08	#ERROR!
LOC100268168	THAP9	0.31291	0	0.718379	0	5.63827	1.72e-08	#ERROR!
DTNA	THAP9	0.24939	0	0.683252	0	5.63737	1.73e-08	#ERROR!
C2orf92	THAP9	0.375827	0	0.751119	0	5.6364	1.74e-08	#ERROR!
PLCB4	THAP9	0.302932	0	0.712899	0	5.63623	1.74e-08	#ERROR!
GOLGA6L9	THAP9	0.372364	0	0.749346	0	5.63612	1.74e-08	#ERROR!
H2BC15	THAP9	0.261018	0	0.689511	0	5.63151	1.79e-08	#ERROR!
IFT74	THAP9	0.578538	0	0.845479	0	5.63147	1.79e-08	#ERROR!
FGD5P1	THAP9	0.133627	8.55e-06	0.613273	5.17e-13	5.6305	1.8e-08	#ERROR!
RALGPS1	THAP9	0.532256	0	0.825216	0	5.62996	1.8e-08	#ERROR!
SPRYD7	THAP9	0.401717	0	0.763815	0	5.62948	1.81e-08	#ERROR!
FSIP2-AS2	THAP9	0.151137	4.64e-07	0.62414	1.52e-13	5.62793	1.82e-08	#ERROR!
CYP2R1	THAP9	0.503055	0	0.811969	0	5.62734	1.83e-08	#ERROR!
DPF3	THAP9	0.037763	0.21034	0.549125	3.02e-10	5.62688	1.83e-08	0/+
CLEC2D	THAP9	0.303528	0	0.712732	0	5.62655	1.84e-08	#ERROR!
SLC12A1	THAP9	0.081145	0.007036	0.578777	1.89e-11	5.6264	1.84e-08	#ERROR!
HINFP	THAP9	0.417669	0	0.771507	0	5.62522	1.85e-08	#ERROR!
RTF1	THAP9	0.611999	0	0.859461	0	5.62514	1.85e-08	#ERROR!
LOC105372988	THAP9	-0.00248	0.934526	0.520185	3.53e-09	5.6242	1.86e-08	0/+
PTPN3	THAP9	0.452081	0	0.788089	0	5.62406	1.87e-08	#ERROR!
KLB	THAP9	0.253457	0	-0.30945	0.000852	-5.62391	1.87e-08	#ERROR!
DHX33	THAP9	0.623428	0	0.86418	0	5.62381	1.87e-08	#ERROR!
RNF2	THAP9	0.572794	0	0.842776	0	5.62359	1.87e-08	#ERROR!
HDAC2	THAP9	0.453913	0	0.788935	0	5.6234	1.87e-08	#ERROR!
TMSB15B	THAP9	0.205951	5.08e-12	0.657186	2.66e-15	5.62259	1.88e-08	#ERROR!
MIR3682	THAP9	0.168584	1.8e-08	0.634619	4.44e-14	5.62258	1.88e-08	#ERROR!
EEF1AKMT3	THAP9	0.435308	0	0.779942	0	5.62152	1.89e-08	#ERROR!
ANKK1	THAP9	0.04822	0.109634	0.555953	1.63e-10	5.6206	1.9e-08	0/+
HLA-DOB	THAP9	0.027273	0.365726	0.541283	6.02e-10	5.62049	1.9e-08	0/+
AGBL2	THAP9	0.342063	0	0.732861	0	5.6182	1.93e-08	#ERROR!
SLC26A8	THAP9	0.199164	2.54e-11	0.652835	4.66e-15	5.61732	1.94e-08	#ERROR!
KIF5A	THAP9	0.198551	2.93e-11	0.652358	4.88e-15	5.61545	1.96e-08	#ERROR!
SLC25A21-AS1	THAP9	0.302166	0	0.711423	0	5.61533	1.96e-08	#ERROR!
LBH	THAP9	0.156139	1.9e-07	0.626413	1.17e-13	5.61442	1.97e-08	#ERROR!
LINC00909	THAP9	0.594426	0	0.851728	0	5.61312	1.99e-08	#ERROR!
ADH5	THAP9	0.664939	0	0.22005	0.019184	-5.6129	1.99e-08	#ERROR!
STAG3L5P-PVRIG2P-PILRB	THAP9	0.194609	7.25e-11	0.649807	6.88e-15	5.61226	2e-08	#ERROR!
RAB27A	THAP9	0.353263	0	0.738348	0	5.6106	2.02e-08	#ERROR!
RNA5SP515	THAP9	-0.01726	0.567101	0.508257	9.09e-09	5.61028	2.02e-08	0/+
ARHGEF33	THAP9	0.299808	0	0.709871	0	5.61006	2.02e-08	#ERROR!
PART1	THAP9	0.065045	0.030843	0.566767	6e-11	5.61001	2.02e-08	#ERROR!
PRSS12	THAP9	0.056363	0.061426	0.560776	1.05e-10	5.60935	2.03e-08	0/+
AATBC	THAP9	0.057092	0.058139	0.561274	1e-10	5.6093	2.03e-08	0/+
DIP2B	THAP9	0.612938	0	0.859421	0	5.60907	2.03e-08	#ERROR!
CAT	THAP9	0.406677	0	-0.14483	0.125873	-5.60878	2.04e-08	#ERROR!
TAF7	THAP9	0.48277	0	0.801942	0	5.60837	2.04e-08	#ERROR!
C19orf18	THAP9	0.109618	0.000267	0.596363	3.18e-12	5.6082	2.04e-08	#ERROR!
RIN2	THAP9	0.324655	0	0.723164	0	5.60801	2.05e-08	#ERROR!
SLC18B1	THAP9	0.257439	0	0.686166	0	5.60711	2.06e-08	#ERROR!
FRMD4B	THAP9	0.35331	0	0.738191	0	5.60672	2.06e-08	#ERROR!
RTN4	THAP9	0.507716	0	-0.01739	0.854928	-5.60449	2.09e-08	#ERROR!
SPRYD4	THAP9	0.418624	0	0.771085	0	5.60386	2.1e-08	#ERROR!
MXD1	THAP9	0.408253	0	0.765897	0	5.60227	2.12e-08	#ERROR!
SLC44A3-AS1	THAP9	0.1313	1.23e-05	0.609861	7.52e-13	5.60056	2.14e-08	#ERROR!
SIPA1L1	THAP9	0.48879	0	0.804408	0	5.59931	2.15e-08	#ERROR!
DGAT1	THAP9	0.19093	1.66e-10	-0.36546	6.88e-05	-5.59897	2.16e-08	#ERROR!
RDH5	THAP9	0.096491	0.001341	-0.44594	7.42e-07	-5.59837	2.16e-08	#ERROR!
KANSL1	THAP9	0.667756	0	0.881589	0	5.59605	2.19e-08	#ERROR!
CCDC6	THAP9	0.505703	0	0.812006	0	5.5939	2.22e-08	#ERROR!
ACSL6	THAP9	0.225635	3.46e-14	0.667108	6.66e-16	5.59368	2.22e-08	#ERROR!
CA14	THAP9	0.270684	0	0.69276	0	5.59089	2.26e-08	#ERROR!
APOBEC3D	THAP9	0.122002	4.89e-05	0.603247	1.54e-12	5.59071	2.26e-08	#ERROR!
GPR161	THAP9	0.228394	1.64e-14	0.668544	4.44e-16	5.59059	2.26e-08	#ERROR!
ARHGAP42-AS1	THAP9	0.174679	5.31e-09	0.636385	3.6e-14	5.59035	2.27e-08	#ERROR!
LOC100506258	THAP9	0.316707	0	0.71797	0	5.58912	2.28e-08	#ERROR!
FMO5	THAP9	0.23973	6.66e-16	0.675037	2.22e-16	5.58905	2.28e-08	#ERROR!
DGAT2	THAP9	0.119233	7.25e-05	-0.42627	2.51e-06	-5.58597	2.32e-08	#ERROR!
MRPS31	THAP9	0.442359	0	0.781876	0	5.58486	2.34e-08	#ERROR!
ERO1B	THAP9	0.35813	0	0.739658	0	5.58451	2.34e-08	#ERROR!
LOC100996419	THAP9	0.417628	0	0.769707	0	5.58266	2.37e-08	#ERROR!
ANKRD49	THAP9	0.559476	0	0.835729	0	5.58244	2.37e-08	#ERROR!
FAM83F	THAP9	0.223683	5.82e-14	0.665237	8.88e-16	5.58099	2.39e-08	#ERROR!
LINC02018	THAP9	0.100822	0.000803	0.588736	6.97e-12	5.58042	2.4e-08	#ERROR!
TTLL5	THAP9	0.551476	0	0.832097	0	5.57898	2.42e-08	#ERROR!
DET1	THAP9	0.590227	0	0.848919	0	5.57744	2.44e-08	#ERROR!
LINC00205	THAP9	0.321532	0	0.719938	0	5.57652	2.45e-08	#ERROR!
FANCB	THAP9	0.472071	0	0.795715	0	5.57583	2.46e-08	#ERROR!
PYROXD1	THAP9	0.596072	0	0.851352	0	5.57508	2.47e-08	#ERROR!
TRIM9	THAP9	0.260387	0	0.68609	0	5.57501	2.48e-08	#ERROR!
STK26	THAP9	0.382822	0	0.751918	0	5.57487	2.48e-08	#ERROR!
HIVEP3	THAP9	0.410063	0	0.765569	0	5.57346	2.5e-08	#ERROR!
RANBP17	THAP9	0.375086	0	0.747728	0	5.56963	2.55e-08	#ERROR!
IQCB1	THAP9	0.507675	0	0.812055	0	5.56954	2.55e-08	#ERROR!
SERINC5	THAP9	0.480487	0	0.79943	0	5.56926	2.56e-08	#ERROR!
KIF3A	THAP9	0.604574	0	0.854786	0	5.56848	2.57e-08	#ERROR!
TKT	THAP9	0.091532	0.002354	-0.44734	6.78e-07	-5.56681	2.59e-08	#ERROR!
FASTKD1	THAP9	0.555375	0	0.833421	0	5.56635	2.6e-08	#ERROR!
GARNL3	THAP9	0.40551	0	0.762989	0	5.56624	2.6e-08	#ERROR!
HAGH	THAP9	0.199696	2.25e-11	-0.35455	0.000117	-5.56574	2.61e-08	#ERROR!
SLC35F2	THAP9	0.219648	1.66e-13	0.66188	1.33e-15	5.56393	2.64e-08	#ERROR!
LRCH1	THAP9	0.423835	0	0.771933	0	5.56268	2.66e-08	#ERROR!
ARHGAP40	THAP9	-0.06605	0.028335	0.467147	1.83e-07	5.56101	2.68e-08	-/+
PLXDC2	THAP9	0.255894	0	0.682722	0	5.56024	2.69e-08	#ERROR!
COL28A1	THAP9	0.237604	1.33e-15	0.672175	4.44e-16	5.56006	2.7e-08	#ERROR!
IL2	THAP9	0.060675	0.044033	0.560255	1.1e-10	5.55994	2.7e-08	#ERROR!
PNMA8A	THAP9	0.164542	3.94e-08	0.628212	9.46e-14	5.55947	2.71e-08	#ERROR!
GNB3	THAP9	0.086967	0.003862	0.578028	2.03e-11	5.55853	2.72e-08	#ERROR!
SLC26A10	THAP9	0.086054	0.004253	0.577403	2.16e-11	5.55835	2.72e-08	#ERROR!
FGF14	THAP9	0.084301	0.005106	0.576205	2.43e-11	5.55807	2.73e-08	#ERROR!
RFX3	THAP9	0.526389	0	0.820126	0	5.55617	2.76e-08	#ERROR!
EXOSC2	THAP9	0.541213	0	0.826704	0	5.55325	2.8e-08	#ERROR!
CDKN2B	THAP9	0.22291	7.11e-14	-0.33195	0.000328	-5.55297	2.81e-08	#ERROR!
HOXA9	THAP9	0.072855	0.015564	0.568017	5.33e-11	5.5517	2.83e-08	#ERROR!
GLMN	THAP9	0.551571	0	0.831257	0	5.55119	2.84e-08	#ERROR!
RFC5	THAP9	0.593523	0	0.849579	0	5.55116	2.84e-08	#ERROR!
NDUFA6-DT	THAP9	0.380828	0	0.749816	0	5.55073	2.84e-08	#ERROR!
PAX6	THAP9	0.385936	0	0.752412	0	5.55043	2.85e-08	#ERROR!
ANKRD26	THAP9	0.5812	0	0.844229	0	5.55009	2.86e-08	#ERROR!
CDK14	THAP9	0.381902	0	0.750279	0	5.5488	2.88e-08	#ERROR!
KRT7-AS	THAP9	-0.04013	0.183173	0.486198	4.78e-08	5.54791	2.89e-08	0/+
PIGN	THAP9	0.599992	0	0.852239	0	5.5472	2.9e-08	#ERROR!
MR1	THAP9	0.326597	0	0.721205	0	5.54714	2.9e-08	#ERROR!
LOC101927495	THAP9	0.166726	2.59e-08	0.628773	8.86e-14	5.54666	2.91e-08	#ERROR!
LURAP1	THAP9	0.144365	1.49e-06	0.614613	4.45e-13	5.54505	2.94e-08	#ERROR!
EFCAB7	THAP9	0.665652	0	0.87955	0	5.54466	2.95e-08	#ERROR!
MAP4K5	THAP9	0.585577	0	0.845953	0	5.54425	2.95e-08	#ERROR!
IL20RA	THAP9	0.166972	2.46e-08	0.628692	8.93e-14	5.5429	2.98e-08	#ERROR!
APBA2	THAP9	-0.02646	0.380163	0.496156	2.29e-08	5.54253	2.98e-08	0/+
KCNK12	THAP9	0.102096	0.000688	0.58702	8.3e-12	5.54246	2.98e-08	#ERROR!
NEK11	THAP9	0.369438	0	0.743561	0	5.54218	2.99e-08	#ERROR!
PDP2	THAP9	0.615537	0	0.14621	0.122282	-5.54117	3e-08	#ERROR!
AMN1	THAP9	0.624271	0	0.862342	0	5.54035	3.02e-08	#ERROR!
AKAP8	THAP9	0.505064	0	0.809781	0	5.53913	3.04e-08	#ERROR!
GSTO2	THAP9	0.317889	0	0.716089	0	5.53878	3.05e-08	#ERROR!
SNAI2	THAP9	0.148659	7.16e-07	0.616874	3.46e-13	5.5378	3.06e-08	#ERROR!
PJA1	THAP9	0.458087	0	-0.07512	0.429058	-5.53758	3.07e-08	#ERROR!
EGOT	THAP9	0.20048	1.87e-11	0.648841	7.77e-15	5.53669	3.08e-08	#ERROR!
RAD52	THAP9	0.569521	0	0.838676	0	5.53494	3.11e-08	#ERROR!
RASL10A	THAP9	-0.04935	0.101579	0.47793	8.64e-08	5.53303	3.15e-08	0/+
SNX10	THAP9	0.433161	0	-0.10547	0.266239	-5.53262	3.15e-08	#ERROR!
CAMK1	THAP9	0.123643	3.86e-05	-0.41805	4.08e-06	-5.53227	3.16e-08	#ERROR!
MBIP	THAP9	0.495219	0	0.804948	0	5.53183	3.17e-08	#ERROR!
SPOPL	THAP9	0.53888	0	0.824906	0	5.5303	3.2e-08	#ERROR!
BBS2	THAP9	0.558969	0	0.833878	0	5.53028	3.2e-08	#ERROR!
ATF1	THAP9	0.655726	0	0.875144	0	5.52991	3.2e-08	#ERROR!
PRPF38A	THAP9	0.595761	0	0.849929	0	5.52977	3.21e-08	#ERROR!
RRAGB	THAP9	0.524668	0	0.81845	0	5.52974	3.21e-08	#ERROR!
SLC16A5	THAP9	0.227216	2.26e-14	0.664332	8.88e-16	5.52907	3.22e-08	#ERROR!
GP6	THAP9	0.115787	0.000117	0.595134	3.61e-12	5.52901	3.22e-08	#ERROR!
EPC2	THAP9	0.674247	0	0.882677	0	5.529	3.22e-08	#ERROR!
MIR4450	THAP9	0.076659	0.010907	0.569022	4.84e-11	5.52897	3.22e-08	#ERROR!
RPL9P2	THAP9	0.16745	2.25e-08	0.628	9.68e-14	5.52701	3.26e-08	#ERROR!
DDX46	THAP9	0.670561	0	0.88113	0	5.52673	3.26e-08	#ERROR!
IFT81	THAP9	0.610165	0	0.855994	0	5.52616	3.27e-08	#ERROR!
NUDT19	THAP9	0.411308	0	0.764132	0	5.52528	3.29e-08	#ERROR!
CCDC148	THAP9	0.396512	0	0.756661	0	5.52497	3.3e-08	#ERROR!
CYP7B1	THAP9	0.245667	0	0.674854	2.22e-16	5.52452	3.3e-08	#ERROR!
THUMPD3-AS1	THAP9	0.42833	0	0.772544	0	5.52403	3.31e-08	#ERROR!
CFAP91	THAP9	0.35205	0	0.733616	0	5.52377	3.32e-08	#ERROR!
DOCK6	THAP9	0.269454	0	-0.28432	0.002273	-5.52302	3.33e-08	#ERROR!
LYG1	THAP9	0.092437	0.002129	0.579128	1.82e-11	5.52102	3.37e-08	#ERROR!
GOLGA7B	THAP9	-0.02934	0.330524	0.492289	3.06e-08	5.5208	3.37e-08	0/+
SNN	THAP9	0.375753	0	-0.1715	0.06932	-5.5198	3.39e-08	#ERROR!
PRR3	THAP9	0.485254	0	0.799808	0	5.51907	3.41e-08	#ERROR!
TMEM140	THAP9	0.334756	0	-0.21652	0.021255	-5.51837	3.42e-08	#ERROR!
RSBN1	THAP9	0.715328	0	0.898833	0	5.51765	3.44e-08	#ERROR!
SCN5A	THAP9	0.121035	5.62e-05	0.59774	2.75e-12	5.51661	3.46e-08	#ERROR!
SFT2D2	THAP9	0.415376	0	0.765787	0	5.51638	3.46e-08	#ERROR!
LRRC37A3	THAP9	0.285486	0	0.697048	0	5.51562	3.48e-08	#ERROR!
NUCKS1	THAP9	0.58116	0	0.843188	0	5.51561	3.48e-08	#ERROR!
CDC42EP3	THAP9	0.227248	2.26e-14	0.663573	1.11e-15	5.51556	3.48e-08	#ERROR!
CELF5	THAP9	0.08013	0.007784	0.57038	4.26e-11	5.51457	3.5e-08	#ERROR!
PBX1	THAP9	0.502304	0	0.807531	0	5.51191	3.55e-08	#ERROR!
MAK16	THAP9	0.486593	0	0.800134	0	5.51083	3.57e-08	#ERROR!
QRSL1	THAP9	0.56369	0	0.835329	0	5.50978	3.59e-08	#ERROR!
POLR2E	THAP9	0.089034	0.003095	-0.44463	8.07e-07	-5.50949	3.6e-08	#ERROR!
LUARIS	THAP9	0.076211	0.011382	0.567345	5.68e-11	5.50929	3.6e-08	#ERROR!
PRPF39	THAP9	0.634725	0	0.865909	0	5.50896	3.61e-08	#ERROR!
LINS1	THAP9	0.589085	0	0.84641	0	5.50785	3.63e-08	#ERROR!
AMT	THAP9	0.105779	0.000436	0.586992	8.32e-12	5.50588	3.67e-08	#ERROR!
SLC39A8	THAP9	0.323921	0	0.717559	0	5.50282	3.74e-08	#ERROR!
LOC101927189	THAP9	0.052766	0.079965	0.550611	2.65e-10	5.50155	3.76e-08	0/+
LINC01679	THAP9	0.004316	0.886198	0.51581	5.01e-09	5.50014	3.79e-08	0/+
TARBP1	THAP9	0.509044	0	0.810209	0	5.49919	3.82e-08	#ERROR!
NWD1	THAP9	0.104885	0.000488	0.585902	9.29e-12	5.49852	3.83e-08	#ERROR!
INAVA	THAP9	0.037788	0.210043	0.53979	6.84e-10	5.49777	3.85e-08	0/+
TMEM67	THAP9	0.596171	0	0.849188	0	5.49772	3.85e-08	#ERROR!
TNFRSF11A	THAP9	0.223987	5.37e-14	0.660505	1.78e-15	5.49589	3.89e-08	#ERROR!
DHX40	THAP9	0.605051	0	0.85295	0	5.49536	3.9e-08	#ERROR!
GTF2IRD2	THAP9	0.35142	0	0.731922	0	5.49522	3.9e-08	#ERROR!
RABL2B	THAP9	0.424784	0	0.769564	0	5.49474	3.91e-08	#ERROR!
NACC2	THAP9	0.34958	0	-0.19801	0.035525	-5.49361	3.94e-08	#ERROR!
IRS1	THAP9	0.314828	0	0.712139	0	5.49351	3.94e-08	#ERROR!
C5orf63	THAP9	0.371386	0	0.742261	0	5.49207	3.97e-08	#ERROR!
KLHL31	THAP9	0.33805	0	-0.21036	0.025327	-5.49179	3.98e-08	#ERROR!
CCDC113	THAP9	0.411351	0	0.762709	0	5.49165	3.98e-08	#ERROR!
PRRC1	THAP9	0.624488	0	0.86111	0	5.49038	4.01e-08	#ERROR!
DNAJC18	THAP9	0.449356	0	0.781477	0	5.49007	4.02e-08	#ERROR!
SEMA6D	THAP9	0.248193	0	0.674374	2.22e-16	5.48983	4.02e-08	#ERROR!
FLVCR1	THAP9	0.499648	0	0.805475	0	5.48921	4.04e-08	#ERROR!
LINC01411	THAP9	0.063266	0.035736	0.556946	1.49e-10	5.48796	4.07e-08	#ERROR!
DENND2B	THAP9	0.204641	6.97e-12	0.648442	8.22e-15	5.48786	4.07e-08	#ERROR!
PTPN2	THAP9	0.472869	0	0.79273	0	5.48732	4.08e-08	#ERROR!
CHTOP	THAP9	0.48412	0	0.798082	0	5.4871	4.09e-08	#ERROR!
LAMA1	THAP9	0.07871	0.008949	0.567497	5.6e-11	5.48705	4.09e-08	#ERROR!
FUT6	THAP9	-0.07586	0.011763	0.45331	4.61e-07	5.48626	4.11e-08	-/+
LRGUK	THAP9	0.186779	4.15e-10	0.637388	3.2e-14	5.48524	4.13e-08	#ERROR!
PCBP1-AS1	THAP9	0.431743	0	0.772574	0	5.48408	4.16e-08	#ERROR!
INTS13	THAP9	0.531511	0	0.819959	0	5.48214	4.2e-08	#ERROR!
LOC101927560	THAP9	0.293011	0	0.699443	0	5.48124	4.22e-08	#ERROR!
SLC4A7	THAP9	0.405813	0	0.759409	0	5.48003	4.25e-08	#ERROR!
LOC107984660	THAP9	0.196637	4.56e-11	0.643103	1.6e-14	5.47991	4.26e-08	#ERROR!
DCAF17	THAP9	0.69988	0	0.891914	0	5.47922	4.27e-08	#ERROR!
SRFBP1	THAP9	0.66865	0	0.879226	0	5.47832	4.29e-08	#ERROR!
DNMT3B	THAP9	0.305233	0	0.70604	0	5.47746	4.31e-08	#ERROR!
FAM120B	THAP9	0.56494	0	0.83486	0	5.4769	4.33e-08	#ERROR!
PKP1	THAP9	0.041271	0.170976	0.540689	6.33e-10	5.47621	4.35e-08	0/+
KLHL29	THAP9	0.067197	0.025702	0.558822	1.26e-10	5.47608	4.35e-08	#ERROR!
CEMIP	THAP9	0.095888	0.001438	0.578346	1.97e-11	5.47579	4.36e-08	#ERROR!
HEPH	THAP9	0.177793	2.8e-09	0.631025	6.79e-14	5.47215	4.45e-08	#ERROR!
SLAMF1	THAP9	0.056641	0.060153	0.551164	2.52e-10	5.4715	4.46e-08	0/+
DUOX2	THAP9	0.078876	0.008806	0.566514	6.14e-11	5.47136	4.47e-08	#ERROR!
RPL17P29	THAP9	0.03105	0.303088	0.533012	1.22e-09	5.47086	4.48e-08	0/+
TBX3	THAP9	0.3043	0	0.705153	0	5.47029	4.49e-08	#ERROR!
PLEKHA5	THAP9	0.582881	0	0.84259	0	5.47028	4.49e-08	#ERROR!
PCDHB14	THAP9	0.240493	4.44e-16	0.668722	4.44e-16	5.46938	4.52e-08	#ERROR!
LOC101927468	THAP9	0.184843	6.31e-10	0.635162	4.17e-14	5.4684	4.54e-08	#ERROR!
C2orf88	THAP9	0.189941	2.07e-10	0.638247	2.86e-14	5.46748	4.56e-08	#ERROR!
RNU2-22P	THAP9	0.296437	0	0.700618	0	5.46718	4.57e-08	#ERROR!
PGD	THAP9	0.255792	0	-0.29225	0.001684	-5.46446	4.64e-08	#ERROR!
ENO4	THAP9	0.255871	0	0.677361	2.22e-16	5.46361	4.67e-08	#ERROR!
PADI2	THAP9	0.101886	0.000706	0.581531	1.44e-11	5.46358	4.67e-08	#ERROR!
CCDC25	THAP9	0.417753	0	0.764712	0	5.46326	4.67e-08	#ERROR!
BDH2	THAP9	0.366962	0	0.738561	0	5.46227	4.7e-08	#ERROR!
SESN3	THAP9	0.249213	0	0.673413	4.44e-16	5.46218	4.7e-08	#ERROR!
NGLY1	THAP9	0.51622	0	0.812225	0	5.46191	4.71e-08	#ERROR!
PRSS46P	THAP9	0.180217	1.69e-09	0.631871	6.15e-14	5.46148	4.72e-08	#ERROR!
PDE3B	THAP9	0.261623	0	-0.28619	0.002119	-5.46097	4.74e-08	#ERROR!
DLGAP1	THAP9	0.184112	7.38e-10	0.63421	4.66e-14	5.46026	4.75e-08	#ERROR!
RNF216P1	THAP9	0.353462	0	0.731325	0	5.4601	4.76e-08	#ERROR!
TNFRSF10A	THAP9	0.349099	0	0.728998	0	5.46004	4.76e-08	#ERROR!
MET	THAP9	0.122783	4.37e-05	0.595027	3.65e-12	5.45848	4.8e-08	#ERROR!
MPPED2	THAP9	0.22277	7.37e-14	0.657572	2.66e-15	5.45797	4.82e-08	#ERROR!
LOC101929140	THAP9	0.397047	0	0.753942	0	5.45732	4.83e-08	#ERROR!
PRIM2	THAP9	0.531577	0	0.819137	0	5.45692	4.84e-08	#ERROR!
LAMP2	THAP9	0.549398	0	0.827223	0	5.45603	4.87e-08	#ERROR!
SLC3A1	THAP9	0.190103	2e-10	0.637641	3.09e-14	5.45592	4.87e-08	#ERROR!
SRRM1	THAP9	0.627574	0	0.861503	0	5.45588	4.87e-08	#ERROR!
TMEM231	THAP9	0.385883	0	0.748084	0	5.45488	4.9e-08	#ERROR!
ARHGAP12	THAP9	0.641926	0	0.86751	0	5.45339	4.94e-08	#ERROR!
ADTRP	THAP9	0.008115	0.787867	0.515004	5.34e-09	5.45258	4.96e-08	0/+
MTARC1	THAP9	0.212384	1.05e-12	-0.33253	0.00032	-5.45195	4.98e-08	#ERROR!
RICTOR	THAP9	0.663743	0	0.876553	0	5.45078	5.01e-08	#ERROR!
ACSS2	THAP9	0.353087	0	-0.18989	0.043963	-5.45049	5.02e-08	#ERROR!
DEUP1	THAP9	0.146308	1.07e-06	0.609673	7.68e-13	5.44903	5.06e-08	#ERROR!
LOC105369147	THAP9	0.37939	0	0.744444	0	5.44895	5.07e-08	#ERROR!
NFX1	THAP9	0.650295	0	0.870856	0	5.44676	5.13e-08	#ERROR!
DCUN1D3	THAP9	0.460984	0	-0.06216	0.513074	-5.44675	5.13e-08	#ERROR!
LOC105372321	THAP9	0.362045	0	0.735215	0	5.44623	5.14e-08	#ERROR!
KIAA2026	THAP9	0.644943	0	0.868595	0	5.44613	5.15e-08	#ERROR!
CHRM5	THAP9	0.258264	0	0.677769	0	5.44604	5.15e-08	#ERROR!
MRE11	THAP9	0.618573	0	0.85736	0	5.44484	5.19e-08	#ERROR!
KCNIP4	THAP9	0.58548	0	0.842971	0	5.44471	5.19e-08	#ERROR!
CCDC47	THAP9	0.538221	0	0.821726	0	5.44347	5.23e-08	#ERROR!
SNHG28	THAP9	0.216065	4.16e-13	0.652665	4.88e-15	5.44289	5.24e-08	#ERROR!
MGAM2	THAP9	0.189791	2.14e-10	0.636587	3.51e-14	5.44183	5.27e-08	#ERROR!
ADGRG6	THAP9	0.219576	1.69e-13	0.654664	3.55e-15	5.44099	5.3e-08	#ERROR!
TTLL4	THAP9	0.349808	0	0.728334	0	5.43843	5.38e-08	#ERROR!
SLC9C1	THAP9	0.253793	0	0.674721	2.22e-16	5.43798	5.39e-08	#ERROR!
SMARCA1	THAP9	0.391386	0	0.750147	0	5.43756	5.4e-08	#ERROR!
MYO5C	THAP9	0.480765	0	0.794548	0	5.43575	5.46e-08	#ERROR!
CCDC92	THAP9	0.308241	0	-0.23634	0.01173	-5.43402	5.51e-08	#ERROR!
FAM229A	THAP9	0.098519	0.001058	0.577103	2.22e-11	5.43188	5.58e-08	#ERROR!
GDF9	THAP9	0.382767	0	0.745373	0	5.43085	5.61e-08	#ERROR!
SETD6	THAP9	0.509783	0	0.808073	0	5.4294	5.65e-08	#ERROR!
CCDC28A-AS1	THAP9	0.261894	0	0.678919	0	5.42892	5.67e-08	#ERROR!
STK17A	THAP9	0.304131	0	0.702684	0	5.42457	5.81e-08	#ERROR!
KLHL28	THAP9	0.594203	0	0.846196	0	5.42406	5.83e-08	#ERROR!
HOXA5	THAP9	0.039282	0.19256	0.53538	9.99e-10	5.423	5.86e-08	0/+
GPATCH2L	THAP9	0.613719	0	0.854616	0	5.42111	5.92e-08	#ERROR!
ALG1L2	THAP9	0.123147	4.15e-05	0.592729	4.63e-12	5.42039	5.95e-08	#ERROR!
DNAJC27	THAP9	0.666985	0	0.87716	0	5.41979	5.97e-08	#ERROR!
POM121L9P	THAP9	-0.01766	0.558056	0.493174	2.86e-08	5.41869	6e-08	0/+
SFMBT1	THAP9	0.588538	0	0.84354	0	5.41852	6.01e-08	#ERROR!
LRATD1	THAP9	0.211043	1.46e-12	0.648182	8.44e-15	5.41852	6.01e-08	#ERROR!
IRF2BP2	THAP9	0.492269	0	0.799372	0	5.4178	6.03e-08	#ERROR!
PHEX-AS1	THAP9	0.032274	0.284418	0.529687	1.61e-09	5.41396	6.16e-08	0/+
DRC3	THAP9	0.216	4.23e-13	0.650817	6e-15	5.41235	6.22e-08	#ERROR!
FCRL2	THAP9	0.024751	0.41174	0.524019	2.58e-09	5.41088	6.27e-08	0/+
LOC101927811	THAP9	0.115838	0.000116	0.587229	8.13e-12	5.41048	6.29e-08	#ERROR!
PRPF40A	THAP9	0.691398	0	0.887002	0	5.41039	6.29e-08	#ERROR!
MASTL	THAP9	0.507672	0	0.806391	0	5.41018	6.3e-08	#ERROR!
RPL32P3	THAP9	0.400762	0	0.753754	0	5.41017	6.3e-08	#ERROR!
RIMS3	THAP9	0.179508	1.96e-09	0.628135	9.55e-14	5.40843	6.36e-08	#ERROR!
CFAP70	THAP9	0.346781	0	0.725192	0	5.40722	6.4e-08	#ERROR!
LINC01237	THAP9	0.231259	7.55e-15	0.659449	2e-15	5.40322	6.55e-08	#ERROR!
PON3	THAP9	0.054546	0.070294	0.544754	4.44e-10	5.40295	6.56e-08	0/+
MKRN7P	THAP9	0.044147	0.143039	0.537355	8.44e-10	5.40259	6.57e-08	0/+
BCLAF1	THAP9	0.736671	0	0.905005	0	5.40055	6.64e-08	#ERROR!
CCP110	THAP9	0.619938	0	0.856728	0	5.40022	6.66e-08	#ERROR!
KLHL23	THAP9	0.575472	0	0.837163	0	5.39963	6.68e-08	#ERROR!
ARHGAP5	THAP9	0.606773	0	0.850994	0	5.39962	6.68e-08	#ERROR!
TSEN2	THAP9	0.538144	0	0.820207	0	5.39924	6.69e-08	#ERROR!
TTC23	THAP9	0.264065	0	0.678475	0	5.39827	6.73e-08	#ERROR!
COL11A1	THAP9	0.065814	0.028911	0.552288	2.28e-10	5.39778	6.75e-08	#ERROR!
H4-16	THAP9	0.329982	0	0.715597	0	5.39775	6.75e-08	#ERROR!
LOC100509620	THAP9	0.085982	0.004285	-0.43779	1.24e-06	-5.39708	6.77e-08	#ERROR!
CYB5R3	THAP9	0.152808	3.45e-07	-0.38131	3.09e-05	-5.39626	6.8e-08	#ERROR!
SPATA4	THAP9	0.206826	4.11e-12	0.644242	1.38e-14	5.39565	6.83e-08	#ERROR!
CLPX	THAP9	0.686119	0	0.884511	0	5.39563	6.83e-08	#ERROR!
CASP1	THAP9	0.10649	0.000398	0.579885	1.69e-11	5.39424	6.88e-08	#ERROR!
TMEM159	THAP9	0.280946	0	0.687931	0	5.39341	6.91e-08	#ERROR!
ACOT2	THAP9	0.293532	0	-0.2476	0.008191	-5.39319	6.92e-08	#ERROR!
NBR1	THAP9	0.621037	0	0.857005	0	5.39298	6.93e-08	#ERROR!
TTC22	THAP9	0.105189	0.000469	0.578917	1.86e-11	5.39287	6.93e-08	#ERROR!
DNAAF4	THAP9	0.324718	0	0.712451	0	5.39266	6.94e-08	#ERROR!
HEPACAM2	THAP9	0.22103	1.16e-13	0.652644	4.88e-15	5.39189	6.97e-08	#ERROR!
CHD2	THAP9	0.602912	0	0.849074	0	5.39155	6.99e-08	#ERROR!
CHRM1	THAP9	0.048566	0.107109	0.539647	6.93e-10	5.39094	7.01e-08	0/+
ACACB	THAP9	0.259054	0	-0.28209	0.00247	-5.39085	7.01e-08	#ERROR!
RNF157	THAP9	0.299227	0	-0.24137	0.01001	-5.38945	7.07e-08	#ERROR!
KCNA3	THAP9	0.17719	3.17e-09	0.625484	1.3e-13	5.38927	7.07e-08	#ERROR!
CTNND1	THAP9	0.607325	0	0.850921	0	5.38856	7.1e-08	#ERROR!
CEP70	THAP9	0.530522	0	0.816313	0	5.38843	7.11e-08	#ERROR!
RSPRY1	THAP9	0.581135	0	0.839334	0	5.38791	7.13e-08	#ERROR!
TTC6	THAP9	0.27711	0	0.685372	0	5.38679	7.17e-08	#ERROR!
SNAP25	THAP9	0.094792	0.001631	0.571316	3.89e-11	5.38456	7.26e-08	#ERROR!
SYCP2	THAP9	0.450807	0	0.777928	0	5.38448	7.27e-08	#ERROR!
MGST1	THAP9	0.191865	1.35e-10	-0.34531	0.00018	-5.38445	7.27e-08	#ERROR!
MARCHF2	THAP9	0.133707	8.45e-06	-0.39677	1.36e-05	-5.38386	7.29e-08	#ERROR!
LOC100418723	THAP9	0.279501	0	0.686557	0	5.38335	7.31e-08	#ERROR!
MICAL3	THAP9	0.324464	0	0.711833	0	5.38324	7.32e-08	#ERROR!
PGGT1B	THAP9	0.623448	0	0.857776	0	5.38303	7.32e-08	#ERROR!
NAP1L3	THAP9	0.204424	7.34e-12	0.641927	1.82e-14	5.38168	7.38e-08	#ERROR!
CCDC27	THAP9	0.289814	0	0.69233	0	5.38122	7.4e-08	#ERROR!
SEPTIN11	THAP9	0.451193	0	-0.06773	0.475981	-5.38099	7.41e-08	#ERROR!
RNU6-1065P	THAP9	0.119437	7.05e-05	0.587507	7.9e-12	5.37915	7.48e-08	#ERROR!
TUBGCP4	THAP9	0.641783	0	0.865531	0	5.37861	7.51e-08	#ERROR!
ONECUT2	THAP9	0.128718	1.82e-05	0.593598	4.24e-12	5.37844	7.51e-08	#ERROR!
CCNJL	THAP9	0.018562	0.538193	0.516993	4.56e-09	5.37742	7.56e-08	0/+
LOXL1-AS1	THAP9	0.356441	0	0.72894	0	5.37739	7.56e-08	#ERROR!
LOC107985040	THAP9	0.205929	5.11e-12	0.642568	1.69e-14	5.37701	7.57e-08	#ERROR!
KHDC1	THAP9	0.16228	6.06e-08	0.61521	4.17e-13	5.37617	7.61e-08	#ERROR!
B3GALT5	THAP9	0.180921	1.46e-09	0.627003	1.09e-13	5.37612	7.61e-08	#ERROR!
LSM14A	THAP9	0.640295	0	0.864802	0	5.375	7.66e-08	#ERROR!
PNISR	THAP9	0.529414	0	0.815296	0	5.37383	7.71e-08	#ERROR!
SHMT1	THAP9	0.358174	0	-0.17641	0.061606	-5.37164	7.8e-08	#ERROR!
KCTD4	THAP9	0.099761	0.000912	0.573792	3.07e-11	5.37162	7.8e-08	#ERROR!
BOK	THAP9	0.014773	0.624223	-0.49168	3.2e-08	-5.37143	7.81e-08	0/-
CMAS	THAP9	0.477124	0	0.790309	0	5.371	7.83e-08	#ERROR!
DSC3	THAP9	0.090855	0.002537	0.56762	5.53e-11	5.37	7.87e-08	#ERROR!
POU2AF1	THAP9	0.020794	0.490458	0.518048	4.19e-09	5.36973	7.89e-08	0/+
RCSD1	THAP9	0.174175	5.89e-09	0.622354	1.86e-13	5.36972	7.89e-08	#ERROR!
LINC02613	THAP9	0.13318	9.17e-06	0.595824	3.36e-12	5.3678	7.97e-08	#ERROR!
ERICH2	THAP9	0.15233	3.76e-07	0.608184	9.03e-13	5.36623	8.04e-08	#ERROR!
ALX4	THAP9	0.047364	0.116089	0.536902	8.77e-10	5.3651	8.09e-08	0/+
PKDREJ	THAP9	0.328539	0	0.713137	0	5.36467	8.11e-08	#ERROR!
POLR2L	THAP9	3.88e-05	0.998975	-0.50218	1.45e-08	-5.36376	8.15e-08	0/-
PIGH	THAP9	0.417968	0	0.760471	0	5.36229	8.22e-08	#ERROR!
POC5	THAP9	0.563231	0	0.830464	0	5.36203	8.23e-08	#ERROR!
NRXN3	THAP9	0.203023	1.02e-11	0.639849	2.35e-14	5.36161	8.25e-08	#ERROR!
STBD1	THAP9	0.274549	0	-0.26383	0.00475	-5.36121	8.27e-08	#ERROR!
JCHAIN	THAP9	0.07846	0.00917	0.558455	1.3e-10	5.36092	8.28e-08	#ERROR!
CFD	THAP9	-0.06098	0.04298	-0.54602	3.98e-10	-5.35775	8.43e-08	-/-
DHX32	THAP9	0.472273	0	0.787397	0	5.35692	8.47e-08	#ERROR!
AP3B2	THAP9	0.099964	0.000891	0.57291	3.34e-11	5.35686	8.47e-08	#ERROR!
CRABP1	THAP9	-0.03956	0.189375	0.471409	1.36e-07	5.35608	8.5e-08	0/+
GK5	THAP9	0.555003	0	0.8265	0	5.35552	8.53e-08	#ERROR!
ADGRF3	THAP9	0.226647	2.64e-14	0.653867	4e-15	5.35518	8.55e-08	#ERROR!
SLC26A5	THAP9	0.250473	0	0.66801	6.66e-16	5.35373	8.62e-08	#ERROR!
LOC654780	THAP9	0.087166	0.003782	0.563929	7.83e-11	5.35339	8.63e-08	#ERROR!
LOC100422398	THAP9	0.19739	3.83e-11	0.635853	3.82e-14	5.35318	8.64e-08	#ERROR!
ARHGAP27P1-BPTFP1-KPNA2P3	THAP9	0.233285	4.44e-15	0.657738	2.44e-15	5.35306	8.65e-08	#ERROR!
BTBD6	THAP9	0.190735	1.73e-10	-0.34347	0.000196	-5.35274	8.66e-08	#ERROR!
MTERF1	THAP9	0.624212	0	0.857275	0	5.3525	8.67e-08	#ERROR!
NFXL1	THAP9	0.727409	0	0.900372	0	5.35135	8.73e-08	#ERROR!
B3GNT3	THAP9	-0.03212	0.286797	0.47674	9.4e-08	5.35043	8.77e-08	0/+
SMAD6	THAP9	0.178357	2.49e-09	-0.35425	0.000118	-5.34753	8.92e-08	#ERROR!
TGFB2	THAP9	0.117759	8.91e-05	0.584221	1.1e-11	5.34708	8.94e-08	#ERROR!
KBTBD3	THAP9	0.450011	0	0.775976	0	5.34634	8.98e-08	#ERROR!
RNF217	THAP9	0.184145	7.33e-10	0.627131	1.07e-13	5.34577	9e-08	#ERROR!
PTPRG-AS1	THAP9	0.367615	0	0.733392	0	5.3454	9.02e-08	#ERROR!
ALCAM	THAP9	0.273901	0	0.681107	0	5.34282	9.15e-08	#ERROR!
LOC101929710	THAP9	0.184874	6.27e-10	0.627395	1.04e-13	5.34267	9.16e-08	#ERROR!
SORL1	THAP9	0.414749	0	0.757956	0	5.34243	9.17e-08	#ERROR!
ITPR2	THAP9	0.420779	0	0.761029	0	5.34202	9.19e-08	#ERROR!
LINC01395	THAP9	0.137089	4.94e-06	0.596671	3.08e-12	5.34189	9.2e-08	#ERROR!
TMEM51-AS1	THAP9	0.168468	1.84e-08	0.616938	3.44e-13	5.34143	9.22e-08	#ERROR!
EML5	THAP9	0.358588	0	0.728355	0	5.34137	9.22e-08	#ERROR!
ROR1	THAP9	0.201813	1.37e-11	0.637851	3.02e-14	5.34108	9.24e-08	#ERROR!
ICE1	THAP9	0.643015	0	0.865056	0	5.33989	9.3e-08	#ERROR!
MAJIN	THAP9	0.020469	0.497273	0.515541	5.12e-09	5.33967	9.31e-08	0/+
ADPRM	THAP9	0.442142	0	0.771749	0	5.33939	9.33e-08	#ERROR!
POLR3A	THAP9	0.618732	0	0.854503	0	5.33854	9.37e-08	#ERROR!
HMGCLL1	THAP9	0.202682	1.11e-11	0.638055	2.93e-14	5.33561	9.52e-08	#ERROR!
MYMX	THAP9	0.060409	0.044971	-0.45332	4.61e-07	-5.33555	9.53e-08	#ERROR!
APELA	THAP9	0.101054	0.000781	0.57214	3.6e-11	5.33504	9.55e-08	#ERROR!
NKRF	THAP9	0.598975	0	0.845683	0	5.33457	9.58e-08	#ERROR!
TM9SF2	THAP9	0.496084	0	0.798066	0	5.33375	9.62e-08	#ERROR!
RBPMS2	THAP9	0.110925	0.000225	-0.41176	5.87e-06	-5.33326	9.65e-08	#ERROR!
CCDC186	THAP9	0.581591	0	0.837848	0	5.33258	9.68e-08	#ERROR!
REV1	THAP9	0.657375	0	0.871003	0	5.33256	9.68e-08	#ERROR!
SARM1	THAP9	0.262803	0	0.674057	4.44e-16	5.33238	9.69e-08	#ERROR!
KHDC4	THAP9	0.488523	0	0.794336	0	5.3317	9.73e-08	#ERROR!
SCML4	THAP9	0.029843	0.322285	0.521743	3.11e-09	5.33097	9.77e-08	0/+
CRNDE	THAP9	0.430692	0	0.765592	0	5.33062	9.79e-08	#ERROR!
PIGL	THAP9	0.411939	0	0.755938	0	5.32945	9.85e-08	#ERROR!
RNF145	THAP9	0.231564	7.11e-15	0.655316	3.55e-15	5.3294	9.85e-08	#ERROR!
MAP3K9	THAP9	0.406526	0	0.753128	0	5.32924	9.86e-08	#ERROR!
LINC01634	THAP9	0.008218	0.785243	0.505573	1.12e-08	5.32774	9.94e-08	0/+
PYGL	THAP9	0.176696	3.52e-09	-0.35392	0.00012	-5.32714	9.98e-08	#ERROR!
CTC1	THAP9	0.426774	0	0.763399	0	5.32598	1e-07	#ERROR!
PNMA1	THAP9	0.428531	0	-0.08975	0.34448	-5.32328	1.02e-07	#ERROR!
TNKS2	THAP9	0.614369	0	0.852141	0	5.32254	1.02e-07	#ERROR!
ARID3C	THAP9	0.041169	0.172041	0.529295	1.67e-09	5.32217	1.03e-07	0/+
ATP9B	THAP9	0.495169	0	0.797178	0	5.3218	1.03e-07	#ERROR!
CHKA	THAP9	0.371946	0	0.734564	0	5.32136	1.03e-07	#ERROR!
MIR573	THAP9	0.436893	0	0.768281	0	5.31985	1.04e-07	#ERROR!
ACTBL2	THAP9	0.050249	0.095463	0.535629	9.78e-10	5.31965	1.04e-07	0/+
ARHGEF12	THAP9	0.568921	0	0.831681	0	5.31892	1.04e-07	#ERROR!
NKX3-1	THAP9	0.145153	1.31e-06	0.600341	2.09e-12	5.31752	1.05e-07	#ERROR!
SARAF	THAP9	0.371966	0	0.734386	0	5.31736	1.05e-07	#ERROR!
ANXA8L1	THAP9	0.00304	0.919701	0.500733	1.62e-08	5.31508	1.07e-07	0/+
SYNCRIP	THAP9	0.596219	0	0.843799	0	5.31234	1.08e-07	#ERROR!
SOCS7	THAP9	0.518068	0	0.807781	0	5.31189	1.08e-07	#ERROR!
TRIM29	THAP9	-0.03391	0.260712	0.472149	1.3e-07	5.31033	1.09e-07	0/+
ANP32E	THAP9	0.415653	0	0.756978	0	5.30954	1.1e-07	#ERROR!
CHRNA5	THAP9	0.182984	9.4e-10	0.624073	1.53e-13	5.30864	1.1e-07	#ERROR!
FZD4	THAP9	0.265005	0	-0.26828	0.004065	-5.30782	1.11e-07	#ERROR!
IGHV4-39	THAP9	0.048996	0.104029	0.533822	1.14e-09	5.30727	1.11e-07	0/+
EMSY	THAP9	0.6027	0	0.84652	0	5.30658	1.12e-07	#ERROR!
LYRM2	THAP9	0.644533	0	0.864835	0	5.30619	1.12e-07	#ERROR!
RBM5	THAP9	0.43271	0	0.765563	0	5.30586	1.12e-07	#ERROR!
TMEM272	THAP9	0.159512	1.02e-07	0.608888	8.36e-13	5.30558	1.12e-07	#ERROR!
CDH15	THAP9	-0.11932	7.17e-05	0.402283	1e-05	5.30551	1.12e-07	-/+
ANKRD36BP2	THAP9	0.163114	5.18e-08	0.611202	6.49e-13	5.30546	1.12e-07	#ERROR!
PEG3	THAP9	0.273245	0	0.678634	0	5.30504	1.13e-07	#ERROR!
ASF1A	THAP9	0.551623	0	0.82328	0	5.30496	1.13e-07	#ERROR!
DNAJC16	THAP9	0.640641	0	0.863107	0	5.30437	1.13e-07	#ERROR!
TNNI1	THAP9	0.139333	3.44e-06	0.595625	3.43e-12	5.30391	1.13e-07	#ERROR!
SUPT3H	THAP9	0.408404	0	0.752925	0	5.3028	1.14e-07	#ERROR!
PCYOX1	THAP9	0.592564	0	0.134904	0.154266	-5.3018	1.15e-07	#ERROR!
SLC23A1	THAP9	0.196884	4.31e-11	0.632337	5.82e-14	5.30117	1.15e-07	#ERROR!
IGF1R	THAP9	0.428351	0	0.763121	0	5.30076	1.15e-07	#ERROR!
SYTL5	THAP9	0.130038	1.49e-05	0.589198	6.65e-12	5.29968	1.16e-07	#ERROR!
EPHX1	THAP9	0.14752	8.72e-07	-0.37741	3.78e-05	-5.29946	1.16e-07	#ERROR!
LOC101927164	THAP9	0.017261	0.56706	0.510121	7.86e-09	5.29942	1.16e-07	0/+
EIF2AK3	THAP9	0.55524	0	0.824756	0	5.29897	1.16e-07	#ERROR!
C2CD2	THAP9	0.32394	0	-0.2065	0.028201	-5.29873	1.17e-07	#ERROR!
LINC01948	THAP9	0.320925	0	0.705467	0	5.2974	1.17e-07	#ERROR!
PUM3	THAP9	0.398735	0	0.747575	0	5.29612	1.18e-07	#ERROR!
AKR7L	THAP9	0.153699	2.94e-07	0.604426	1.35e-12	5.2949	1.19e-07	#ERROR!
CHMP1B2P	THAP9	0.234294	3.33e-15	0.654862	3.55e-15	5.29364	1.2e-07	#ERROR!
FAM171B	THAP9	0.373397	0	0.734025	0	5.29362	1.2e-07	#ERROR!
RPS3AP34	THAP9	0.25362	0	0.666425	8.88e-16	5.29336	1.2e-07	#ERROR!
TDP1	THAP9	0.539831	0	0.817353	0	5.29208	1.21e-07	#ERROR!
TMEFF2	THAP9	-0.07449	0.013376	0.438392	1.19e-06	5.29204	1.21e-07	-/+
SERPINI1	THAP9	0.281204	0	0.682533	0	5.29185	1.21e-07	#ERROR!
CADPS2	THAP9	0.286629	0	0.685662	0	5.29166	1.21e-07	#ERROR!
PARP4P3	THAP9	0.126445	2.56e-05	0.586049	9.15e-12	5.28844	1.23e-07	#ERROR!
LARS1	THAP9	0.678188	0	0.878726	0	5.28744	1.24e-07	#ERROR!
RNMT	THAP9	0.657713	0	0.869989	0	5.28611	1.25e-07	#ERROR!
RN7SKP23	THAP9	0.339601	0	0.715246	0	5.28553	1.25e-07	#ERROR!
LINC01198	THAP9	0.003998	0.894534	0.499118	1.83e-08	5.28487	1.26e-07	0/+
PKHD1	THAP9	0.063633	0.034674	0.542605	5.36e-10	5.28475	1.26e-07	#ERROR!
TDG	THAP9	0.590436	0	0.840374	0	5.28465	1.26e-07	#ERROR!
SPDYA	THAP9	0.368762	0	0.731092	0	5.28435	1.26e-07	#ERROR!
EXOC6	THAP9	0.509083	0	0.802463	0	5.28358	1.27e-07	#ERROR!
METTL3	THAP9	0.448591	0	0.77267	0	5.28342	1.27e-07	#ERROR!
ASH1L-AS1	THAP9	0.323249	0	0.70602	0	5.28293	1.27e-07	#ERROR!
ANKRD42	THAP9	0.409576	0	0.75256	0	5.28096	1.29e-07	#ERROR!
RCHY1	THAP9	0.716155	0	0.894373	0	5.28023	1.29e-07	#ERROR!
LIMK2	THAP9	0.287891	0	0.685761	0	5.28012	1.29e-07	#ERROR!
MIR9-3HG	THAP9	0.153057	3.3e-07	0.602824	1.61e-12	5.2768	1.31e-07	#ERROR!
COG6	THAP9	0.539329	0	0.816561	0	5.27581	1.32e-07	#ERROR!
PAXIP1	THAP9	0.605963	0	0.847065	0	5.27537	1.32e-07	#ERROR!
RBFADN	THAP9	0.311871	0	0.699201	0	5.27501	1.33e-07	#ERROR!
GLB1L3	THAP9	0.005133	0.864846	0.499207	1.82e-08	5.27499	1.33e-07	0/+
LGALS4	THAP9	0.030656	0.309264	0.517771	4.28e-09	5.27021	1.36e-07	0/+
LOC339874	THAP9	0.276064	0	0.678315	0	5.26969	1.37e-07	#ERROR!
SAP30L-AS1	THAP9	0.326941	0	0.707364	0	5.26891	1.37e-07	#ERROR!
TMEM63A	THAP9	0.324044	0	0.705726	0	5.2686	1.37e-07	#ERROR!
SP110	THAP9	0.297192	0	0.690437	0	5.26758	1.38e-07	#ERROR!
HELB	THAP9	0.4833	0	0.789292	0	5.26677	1.39e-07	#ERROR!
GABBR1	THAP9	0.259108	0	0.668144	6.66e-16	5.2664	1.39e-07	#ERROR!
SPG11	THAP9	0.559961	0	0.825869	0	5.26633	1.39e-07	#ERROR!
SENP6	THAP9	0.694545	0	0.885089	0	5.26512	1.4e-07	#ERROR!
APP	THAP9	0.356229	0	0.723343	0	5.26475	1.4e-07	#ERROR!
CGNL1	THAP9	0.294441	0	0.688697	0	5.26464	1.4e-07	#ERROR!
OR51E1	THAP9	0.257094	0	-0.27193	0.003573	-5.26357	1.41e-07	#ERROR!
PTGR2	THAP9	0.41794	0	0.756108	0	5.26291	1.42e-07	#ERROR!
CD81	THAP9	0.165751	3.12e-08	-0.35794	9.92e-05	-5.26239	1.42e-07	#ERROR!
CMTM7	THAP9	0.033423	0.267621	0.519167	3.83e-09	5.26186	1.43e-07	0/+
TBC1D16	THAP9	0.380244	0	-0.14043	0.137924	-5.26133	1.43e-07	#ERROR!
ETV5	THAP9	0.215631	4.65e-13	0.641522	1.91e-14	5.26111	1.43e-07	#ERROR!
TMEM37	THAP9	0.071914	0.016955	-0.43784	1.24e-06	-5.26021	1.44e-07	#ERROR!
TLK1	THAP9	0.678732	0	0.878314	0	5.26009	1.44e-07	#ERROR!
FAF1	THAP9	0.563069	0	0.827081	0	5.25939	1.45e-07	#ERROR!
LRFN5	THAP9	0.105701	0.00044	0.570003	4.41e-11	5.25861	1.45e-07	#ERROR!
CDH17	THAP9	0.111432	0.00021	0.573891	3.04e-11	5.2584	1.45e-07	#ERROR!
KAT6B	THAP9	0.502498	0	0.798336	0	5.25798	1.46e-07	#ERROR!
LARP4B	THAP9	0.609661	0	0.848207	0	5.2578	1.46e-07	#ERROR!
RIMKLA	THAP9	0.228723	1.51e-14	0.649336	7.33e-15	5.25743	1.46e-07	#ERROR!
IL17RD	THAP9	0.353341	0	0.72138	0	5.25697	1.46e-07	#ERROR!
PAWR	THAP9	0.528928	0	0.810981	0	5.25669	1.47e-07	#ERROR!
JADE3	THAP9	0.4995	0	0.796817	0	5.25632	1.47e-07	#ERROR!
PDE5A	THAP9	0.428154	0	0.761097	0	5.25621	1.47e-07	#ERROR!
RSPH3	THAP9	0.534733	0	0.813686	0	5.25532	1.48e-07	#ERROR!
RXRA	THAP9	0.281979	0	-0.24601	0.008627	-5.25432	1.49e-07	#ERROR!
AP1M1	THAP9	0.229585	1.2e-14	-0.29787	0.001354	-5.25379	1.49e-07	#ERROR!
DACH1	THAP9	0.247444	0	0.660422	1.78e-15	5.2532	1.49e-07	#ERROR!
MSL3	THAP9	0.372666	0	0.731442	0	5.24769	1.54e-07	#ERROR!
CTSA	THAP9	0.2178	2.67e-13	-0.30852	0.000885	-5.24722	1.54e-07	#ERROR!
KIAA0586	THAP9	0.634389	0	0.858855	0	5.24703	1.55e-07	#ERROR!
LZTS1	THAP9	0.12439	3.46e-05	0.581812	1.4e-11	5.24629	1.55e-07	#ERROR!
CUZD1	THAP9	0.279288	0	0.678896	0	5.24622	1.55e-07	#ERROR!
TMEM170B	THAP9	0.527529	0	0.046555	0.624384	-5.24596	1.55e-07	#ERROR!
FAM76B	THAP9	0.617881	0	0.851506	0	5.24507	1.56e-07	#ERROR!
TRPS1	THAP9	0.532202	0	0.812099	0	5.24426	1.57e-07	#ERROR!
BEAN1	THAP9	0.044745	0.137694	0.526003	2.19e-09	5.24306	1.58e-07	0/+
TRIM38	THAP9	0.363813	0	0.726414	0	5.24296	1.58e-07	#ERROR!
ADIPOR2	THAP9	0.495512	0	0.003527	0.970428	-5.24291	1.58e-07	#ERROR!
TSBP1	THAP9	0.062111	0.039256	0.538457	7.68e-10	5.24268	1.58e-07	#ERROR!
SUSD6	THAP9	0.379715	0	0.734995	0	5.24258	1.58e-07	#ERROR!
GPBAR1	THAP9	-0.02595	0.389493	-0.51208	6.74e-09	-5.24082	1.6e-07	0/-
PCDHB5	THAP9	0.118746	7.77e-05	0.577624	2.11e-11	5.24066	1.6e-07	#ERROR!
SMG1P3	THAP9	0.488291	0	0.790733	0	5.24056	1.6e-07	#ERROR!
KCNIP1-OT1	THAP9	0.117683	9.01e-05	0.576881	2.27e-11	5.24031	1.6e-07	#ERROR!
HNRNPH1	THAP9	0.560528	0	0.825272	0	5.24012	1.6e-07	#ERROR!
LOC100128108	THAP9	0.048296	0.109071	0.528324	1.81e-09	5.23971	1.61e-07	0/+
TES	THAP9	0.280092	0	0.679004	0	5.2397	1.61e-07	#ERROR!
PRKCH	THAP9	0.335253	0	0.710469	0	5.23886	1.62e-07	#ERROR!
TMEM150B	THAP9	0.030577	0.310524	-0.46898	1.61e-07	-5.23842	1.62e-07	0/-
GRAMD1C	THAP9	0.496602	0	0.794696	0	5.23759	1.63e-07	#ERROR!
SLC25A45	THAP9	0.281626	0	0.679772	0	5.23737	1.63e-07	#ERROR!
C11orf71	THAP9	0.416832	0	0.754363	0	5.23648	1.64e-07	#ERROR!
SEC14L1P1	THAP9	0.28684	0	0.682748	0	5.23622	1.64e-07	#ERROR!
ECHDC3	THAP9	0.21506	5.36e-13	-0.31006	0.000831	-5.23586	1.64e-07	#ERROR!
CBX3P2	THAP9	0.371413	0	0.730171	0	5.23532	1.65e-07	#ERROR!
ANKHD1	THAP9	0.537325	0	0.814215	0	5.23522	1.65e-07	#ERROR!
LOC100507642	THAP9	0.145783	1.17e-06	0.595256	3.57e-12	5.23442	1.66e-07	#ERROR!
C16orf70	THAP9	0.549477	0	0.819917	0	5.23436	1.66e-07	#ERROR!
LINC00996	THAP9	0.064212	0.033056	0.539321	7.13e-10	5.23402	1.66e-07	#ERROR!
FAM185A	THAP9	0.504476	0	0.798378	0	5.23339	1.66e-07	#ERROR!
JARID2	THAP9	0.530174	0	0.810732	0	5.23282	1.67e-07	#ERROR!
CCDC65	THAP9	0.278	0	0.677289	2.22e-16	5.23088	1.69e-07	#ERROR!
DGCR5	THAP9	0.055975	0.063238	0.533106	1.21e-09	5.22959	1.7e-07	0/+
EIF2AK3-DT	THAP9	0.506795	0	0.799324	0	5.22851	1.71e-07	#ERROR!
PTPN11	THAP9	0.657115	0	0.244635	0.009017	-5.2255	1.74e-07	#ERROR!
FBXL13	THAP9	0.422552	0	0.75684	0	5.22511	1.74e-07	#ERROR!
LAYN	THAP9	0.15228	3.79e-07	0.598898	2.44e-12	5.22484	1.74e-07	#ERROR!
PARD6G	THAP9	0.392202	0	0.740766	0	5.22312	1.76e-07	#ERROR!
TMEM39A	THAP9	0.524664	0	0.807731	0	5.2225	1.77e-07	#ERROR!
TUB	THAP9	0.307592	0	0.693978	0	5.22243	1.77e-07	#ERROR!
ENPP6	THAP9	0.149026	6.72e-07	0.596573	3.11e-12	5.22206	1.77e-07	#ERROR!
TENT5D	THAP9	0.183567	8.3e-10	0.618921	2.75e-13	5.22126	1.78e-07	#ERROR!
TRIB2	THAP9	0.182611	1.02e-09	0.618265	2.96e-13	5.22054	1.78e-07	#ERROR!
FRS2	THAP9	0.569094	0	0.828579	0	5.2195	1.79e-07	#ERROR!
EPHX2	THAP9	0.162432	5.89e-08	0.605141	1.25e-12	5.21884	1.8e-07	#ERROR!
CA5BP1	THAP9	0.266258	0	0.669671	4.44e-16	5.21865	1.8e-07	#ERROR!
EPHA4	THAP9	0.171149	1.08e-08	0.610751	6.82e-13	5.21819	1.81e-07	#ERROR!
AOC2	THAP9	0.191575	1.44e-10	-0.33028	0.000353	-5.21668	1.82e-07	#ERROR!
EEF1AKMT2	THAP9	0.548876	0	0.819022	0	5.21626	1.83e-07	#ERROR!
MZT1	THAP9	0.504727	0	0.797813	0	5.215	1.84e-07	#ERROR!
LINC00885	THAP9	0.124492	3.41e-05	0.579716	1.72e-11	5.21456	1.84e-07	#ERROR!
BTN2A3P	THAP9	0.343391	0	0.713752	0	5.21423	1.85e-07	#ERROR!
ASTE1	THAP9	0.544161	0	0.816721	0	5.21404	1.85e-07	#ERROR!
PTK7	THAP9	0.095647	0.001479	0.559898	1.14e-10	5.2131	1.86e-07	#ERROR!
HECW2-AS1	THAP9	0.173616	6.59e-09	0.611945	5.98e-13	5.21201	1.87e-07	#ERROR!
POLR3G	THAP9	0.412769	0	0.751073	0	5.21042	1.88e-07	#ERROR!
SETD4	THAP9	0.507094	0	0.798776	0	5.20986	1.89e-07	#ERROR!
SPATA32	THAP9	0.268487	0	0.670494	4.44e-16	5.20983	1.89e-07	#ERROR!
FYB2	THAP9	0.140886	2.67e-06	0.590335	5.93e-12	5.20929	1.9e-07	#ERROR!
EIF4A1P12	THAP9	0.067674	0.024669	0.539952	6.75e-10	5.2089	1.9e-07	#ERROR!
COL23A1	THAP9	-0.10939	0.000275	0.402337	9.98e-06	5.20844	1.9e-07	-/+
SNURF	THAP9	0.284927	0	0.680052	0	5.20757	1.91e-07	#ERROR!
TRIM46	THAP9	0.059557	0.048089	0.534044	1.12e-09	5.20742	1.91e-07	#ERROR!
KCNS1	THAP9	0.016009	0.595503	0.502138	1.46e-08	5.20733	1.92e-07	0/+
ERLIN2	THAP9	0.522972	0	0.806323	0	5.20594	1.93e-07	#ERROR!
SLC35A1	THAP9	0.45801	0	0.774197	0	5.2052	1.94e-07	#ERROR!
EFNA5	THAP9	0.078223	0.009384	0.547086	3.62e-10	5.20423	1.95e-07	#ERROR!
ALDH4A1	THAP9	0.120114	6.41e-05	-0.39262	1.7e-05	-5.20195	1.97e-07	#ERROR!
ERN1	THAP9	0.455599	0	0.772827	0	5.20166	1.98e-07	#ERROR!
OR10A3	THAP9	0.034758	0.248966	0.515513	5.13e-09	5.20042	1.99e-07	0/+
FAM228A	THAP9	0.127622	2.15e-05	-0.386	2.42e-05	-5.20019	1.99e-07	#ERROR!
PLPP6	THAP9	0.465536	0	0.777776	0	5.19967	2e-07	#ERROR!
LOC100289518	THAP9	0.458228	0	0.774076	0	5.19957	2e-07	#ERROR!
HP1BP3	THAP9	0.582052	0	0.833931	0	5.19951	2e-07	#ERROR!
SYCP2L	THAP9	0.17251	8.24e-09	0.610398	7.09e-13	5.1991	2e-07	#ERROR!
TMEM87A	THAP9	0.560818	0	0.824037	0	5.19851	2.01e-07	#ERROR!
RCOR1	THAP9	0.617588	0	0.850029	0	5.19773	2.02e-07	#ERROR!
LOC105378663	THAP9	0.213913	7.16e-13	-0.30754	0.000921	-5.19711	2.02e-07	#ERROR!
SLC20A2	THAP9	0.439772	0	0.764413	0	5.19421	2.06e-07	#ERROR!
RSPH4A	THAP9	0.285867	0	0.679851	0	5.19399	2.06e-07	#ERROR!
SERP1	THAP9	0.483813	0	0.786584	0	5.19091	2.09e-07	#ERROR!
OVAAL	THAP9	0.046135	0.12587	0.523035	2.8e-09	5.18977	2.11e-07	0/+
BACE2	THAP9	0.119629	6.86e-05	0.574686	2.81e-11	5.18925	2.11e-07	#ERROR!
BTN1A1	THAP9	0.120448	6.11e-05	0.575224	2.67e-11	5.18898	2.11e-07	#ERROR!
MAPKAPK5	THAP9	0.655212	0	0.866435	0	5.18858	2.12e-07	#ERROR!
PEMT	THAP9	0.137422	4.68e-06	-0.37644	3.97e-05	-5.18837	2.12e-07	#ERROR!
KIN	THAP9	0.566959	0	0.826565	0	5.18806	2.12e-07	#ERROR!
PDPK1	THAP9	0.613589	0	0.847948	0	5.1879	2.13e-07	#ERROR!
RAPGEF6	THAP9	0.595976	0	0.839947	0	5.18753	2.13e-07	#ERROR!
ACP1	THAP9	0.528226	0	0.808185	0	5.18736	2.13e-07	#ERROR!
LINC01761	THAP9	0.053729	0.074607	0.528257	1.82e-09	5.1859	2.15e-07	0/+
CABLES2	THAP9	0.422509	0	0.75508	0	5.18573	2.15e-07	#ERROR!
LEXM	THAP9	0.139488	3.35e-06	0.587748	7.71e-12	5.18465	2.16e-07	#ERROR!
AMIGO2	THAP9	0.244144	2.22e-16	0.654412	3.77e-15	5.18453	2.17e-07	#ERROR!
ETV3L	THAP9	-0.02639	0.381514	0.467878	1.74e-07	5.18396	2.17e-07	0/+
MTX3	THAP9	0.58843	0	0.836361	0	5.18331	2.18e-07	#ERROR!
DCAF4	THAP9	0.328543	0	0.703809	0	5.1827	2.19e-07	#ERROR!
RPGRIP1L	THAP9	0.563394	0	0.824707	0	5.18225	2.19e-07	#ERROR!
INPP5K	THAP9	0.321764	0	-0.19727	0.036228	-5.18167	2.2e-07	#ERROR!
CEP78	THAP9	0.641791	0	0.860355	0	5.18158	2.2e-07	#ERROR!
CCDC38	THAP9	0.301012	0	0.687987	0	5.18151	2.2e-07	#ERROR!
LINC01480	THAP9	0.111558	0.000207	0.568615	5.03e-11	5.1811	2.21e-07	#ERROR!
OR2L13	THAP9	0.1157	0.000118	0.571411	3.86e-11	5.18058	2.21e-07	#ERROR!
FAM160A2	THAP9	0.388337	0	0.736593	0	5.1782	2.24e-07	#ERROR!
MFSD14C	THAP9	0.494162	0	0.791226	0	5.17819	2.24e-07	#ERROR!
SUPV3L1	THAP9	0.550851	0	0.818651	0	5.17781	2.24e-07	#ERROR!
FETUB	THAP9	-0.02328	0.440159	0.46974	1.53e-07	5.17691	2.26e-07	0/+
OVGP1	THAP9	0.21328	8.39e-13	0.634887	4.31e-14	5.17631	2.26e-07	#ERROR!
PUM1	THAP9	0.701223	0	0.885923	0	5.17622	2.26e-07	#ERROR!
ERMARD	THAP9	0.422526	0	0.754655	0	5.17594	2.27e-07	#ERROR!
SUCNR1	THAP9	0.26717	0	-0.25344	0.006758	-5.17578	2.27e-07	#ERROR!
EDN3	THAP9	0.010525	0.727077	0.495507	2.41e-08	5.17487	2.28e-07	0/+
IL7R	THAP9	0.094833	0.001623	0.556607	1.54e-10	5.17464	2.28e-07	#ERROR!
LINC02275	THAP9	0.028501	0.344528	0.508888	8.66e-09	5.17401	2.29e-07	0/+
KCNRG	THAP9	0.171396	1.03e-08	0.608043	9.17e-13	5.17388	2.29e-07	#ERROR!
CD2AP	THAP9	0.656842	0	0.866757	0	5.17338	2.3e-07	#ERROR!
DNAJC2	THAP9	0.500961	0	0.794239	0	5.1692	2.35e-07	#ERROR!
SRSF5	THAP9	0.354425	0	0.717616	0	5.16914	2.35e-07	#ERROR!
TUBA3D	THAP9	0.08872	0.003202	0.551934	2.35e-10	5.16902	2.35e-07	#ERROR!
FANCC	THAP9	0.479338	0	0.783476	0	5.16881	2.36e-07	#ERROR!
CT75	THAP9	0.04873	0.105928	0.523349	2.72e-09	5.16871	2.36e-07	0/+
NNAT	THAP9	0.109267	0.000279	-0.39892	1.21e-05	-5.16771	2.37e-07	#ERROR!
LGR6	THAP9	0.039571	0.189301	0.516553	4.72e-09	5.16736	2.37e-07	0/+
FRMD5	THAP9	0.195577	5.81e-11	0.623044	1.72e-13	5.16543	2.4e-07	#ERROR!
LRP6	THAP9	0.581066	0	0.83238	0	5.16474	2.41e-07	#ERROR!
CNOT6	THAP9	0.645165	0	0.861378	0	5.16402	2.42e-07	#ERROR!
TLR5	THAP9	0.471463	0	0.779237	0	5.16194	2.44e-07	#ERROR!
FGFBP3	THAP9	0.118067	8.54e-05	0.571713	3.75e-11	5.16163	2.45e-07	#ERROR!
TTC7B	THAP9	0.372925	0	-0.13872	0.142842	-5.16153	2.45e-07	#ERROR!
OMA1	THAP9	0.621092	0	0.850567	0	5.16137	2.45e-07	#ERROR!
LOC101930370	THAP9	0.362064	0	0.721365	0	5.1595	2.48e-07	#ERROR!
CSPP1	THAP9	0.556572	0	0.820723	0	5.159	2.48e-07	#ERROR!
PRKCD	THAP9	0.324054	0	-0.19252	0.041065	-5.15846	2.49e-07	#ERROR!
SNHG3	THAP9	0.176874	3.39e-09	0.610566	6.96e-13	5.15799	2.5e-07	#ERROR!
CCDC171	THAP9	0.613114	0	0.846851	0	5.15749	2.5e-07	#ERROR!
PIAS1	THAP9	0.658015	0	0.86685	0	5.15695	2.51e-07	#ERROR!
MRAP2	THAP9	0.038054	0.206846	0.514626	5.51e-09	5.15663	2.51e-07	0/+
LINC00958	THAP9	0.125719	2.85e-05	0.576557	2.34e-11	5.15636	2.52e-07	#ERROR!
LCA5L	THAP9	0.468046	0	0.777228	0	5.15504	2.54e-07	#ERROR!
ACTL6A	THAP9	0.539449	0	0.812422	0	5.15473	2.54e-07	#ERROR!
DCAF10	THAP9	0.498105	0	0.792228	0	5.15348	2.56e-07	#ERROR!
GBE1	THAP9	0.392395	0	-0.11545	0.223346	-5.15338	2.56e-07	#ERROR!
TLN1	THAP9	0.385165	0	-0.12379	0.191457	-5.15281	2.57e-07	#ERROR!
DDIAS	THAP9	0.411626	0	0.747823	0	5.15178	2.58e-07	#ERROR!
ANKHD1-EIF4EBP3	THAP9	0.195556	5.84e-11	0.622156	1.9e-13	5.15157	2.58e-07	#ERROR!
MYLK-AS1	THAP9	0.027036	0.369913	0.506081	1.08e-08	5.15154	2.58e-07	0/+
MRAP	THAP9	0.046351	0.124105	-0.44943	5.93e-07	-5.15123	2.59e-07	0/-
BIRC3	THAP9	0.173325	6.99e-09	0.607813	9.4e-13	5.15104	2.59e-07	#ERROR!
TOMM20	THAP9	0.56558	0	0.824698	0	5.15082	2.59e-07	#ERROR!
STX11	THAP9	0.172898	7.62e-09	-0.34127	0.000216	-5.14936	2.61e-07	#ERROR!
ARMH1	THAP9	-0.02884	0.338841	0.463151	2.4e-07	5.14918	2.62e-07	0/+
RCAN1	THAP9	0.126758	2.44e-05	0.576761	2.3e-11	5.14909	2.62e-07	#ERROR!
C7orf31	THAP9	0.212018	1.15e-12	0.632406	5.77e-14	5.14888	2.62e-07	#ERROR!
IFNLR1	THAP9	0.38583	0	0.733795	0	5.14769	2.64e-07	#ERROR!
SERBP1	THAP9	0.510601	0	0.798154	0	5.14724	2.64e-07	#ERROR!
DMKN	THAP9	0.014079	0.640607	0.49602	2.32e-08	5.14696	2.65e-07	0/+
NPR1	THAP9	0.0398	0.186756	-0.45429	4.32e-07	-5.14673	2.65e-07	0/-
ANKS1B	THAP9	0.463238	0	0.774428	0	5.14634	2.66e-07	#ERROR!
BBIP1	THAP9	0.528177	0	0.806671	0	5.14576	2.66e-07	#ERROR!
TMEM154	THAP9	0.393773	0	0.73797	0	5.14516	2.67e-07	#ERROR!
LINC00865	THAP9	0.256837	0	0.659798	1.78e-15	5.14505	2.67e-07	#ERROR!
PSMD5	THAP9	0.479872	0	0.782796	0	5.145	2.68e-07	#ERROR!
INTS4	THAP9	0.505548	0	0.795578	0	5.14484	2.68e-07	#ERROR!
TNNI2	THAP9	-0.15996	9.37e-08	0.352521	0.000128	5.14435	2.68e-07	-/+
MGLL	THAP9	0.147391	8.92e-07	-0.36371	7.5e-05	-5.144	2.69e-07	#ERROR!
DUOX1	THAP9	0.188753	2.69e-10	0.617303	3.3e-13	5.14364	2.69e-07	#ERROR!
TLCD2	THAP9	0.214235	6.61e-13	-0.30217	0.001143	-5.14287	2.71e-07	#ERROR!
FOXQ1	THAP9	0.015364	0.610421	0.496604	2.22e-08	5.142	2.72e-07	0/+
SPATA9	THAP9	0.278837	0	-0.2383	0.01103	-5.14171	2.72e-07	#ERROR!
COL4A2	THAP9	0.102255	0.000675	-0.40261	9.84e-06	-5.14149	2.73e-07	#ERROR!
HSDL1	THAP9	0.614458	0	0.846982	0	5.14102	2.73e-07	#ERROR!
IFNWP19	THAP9	0.011693	0.698219	0.493746	2.74e-08	5.14089	2.73e-07	0/+
FZD1	THAP9	0.195299	6.2e-11	0.621297	2.1e-13	5.14054	2.74e-07	#ERROR!
DNMBP-AS1	THAP9	0.15857	1.21e-07	0.597455	2.84e-12	5.14042	2.74e-07	#ERROR!
TBC1D32	THAP9	0.604546	0	0.8424	0	5.13887	2.76e-07	#ERROR!
LOC100133315	THAP9	0.490866	0	0.788048	0	5.13847	2.77e-07	#ERROR!
GPR174	THAP9	0.200063	2.06e-11	0.624151	1.51e-13	5.13768	2.78e-07	#ERROR!
FZD10-AS1	THAP9	0.03857	0.200757	0.513537	6e-09	5.13724	2.79e-07	0/+
NSUN7	THAP9	0.476843	0	0.78094	0	5.13679	2.79e-07	#ERROR!
FBXO16	THAP9	0.243736	2.22e-16	0.651243	5.77e-15	5.13508	2.82e-07	#ERROR!
FSCN3	THAP9	0.179729	1.87e-09	0.610927	6.69e-13	5.13493	2.82e-07	#ERROR!
SLC16A9	THAP9	0.222332	8.26e-14	0.637976	2.98e-14	5.13445	2.83e-07	#ERROR!
FSD2	THAP9	0.16765	2.16e-08	0.602999	1.58e-12	5.134	2.84e-07	#ERROR!
FBXO45	THAP9	0.573684	0	0.827937	0	5.13348	2.84e-07	#ERROR!
GOSR1	THAP9	0.685273	0	0.878127	0	5.13339	2.85e-07	#ERROR!
PEX13	THAP9	0.596489	0	0.838526	0	5.13312	2.85e-07	#ERROR!
MSH2-OT1	THAP9	0.231545	7.11e-15	0.643585	1.51e-14	5.13253	2.86e-07	#ERROR!
TSC22D1	THAP9	0.33105	0	0.702583	0	5.13183	2.87e-07	#ERROR!
LINC00937	THAP9	0.045614	0.130205	0.518247	4.12e-09	5.13103	2.88e-07	0/+
DNMBP	THAP9	0.324982	0	0.699011	0	5.1297	2.9e-07	#ERROR!
SNHG31	THAP9	0.423173	0	0.752911	0	5.12906	2.91e-07	#ERROR!
PCDHGA6	THAP9	0.243496	2.22e-16	0.650678	6.22e-15	5.12804	2.93e-07	#ERROR!
SCPEP1	THAP9	0.156701	1.71e-07	0.595393	3.52e-12	5.12795	2.93e-07	#ERROR!
PCBD2	THAP9	0.516709	0	0.800391	0	5.12682	2.95e-07	#ERROR!
ANKRD18EP	THAP9	0.645516	0	0.860531	0	5.12637	2.95e-07	#ERROR!
ITK	THAP9	0.111663	0.000204	0.564834	7.19e-11	5.12598	2.96e-07	#ERROR!
KLHL13	THAP9	0.192821	1.09e-10	0.618673	2.83e-13	5.12416	2.99e-07	#ERROR!
TTC5	THAP9	0.612359	0	0.845486	0	5.12255	3.01e-07	#ERROR!
MYLK3	THAP9	0.256838	0	0.658456	2.22e-15	5.12198	3.02e-07	#ERROR!
FAM178B	THAP9	0.071142	0.018178	-0.42682	2.43e-06	-5.12101	3.04e-07	#ERROR!
MIR3685	THAP9	0.336103	0	0.704839	0	5.12001	3.06e-07	#ERROR!
AKAP5	THAP9	0.364155	0	0.720533	0	5.11928	3.07e-07	#ERROR!
CUL5	THAP9	0.637487	0	0.856726	0	5.11822	3.08e-07	#ERROR!
DICER1-AS1	THAP9	0.255898	0	0.657399	2.66e-15	5.11367	3.16e-07	#ERROR!
ANKRD45	THAP9	0.20274	1.1e-11	0.624319	1.49e-13	5.11325	3.17e-07	#ERROR!
NUP133	THAP9	0.572707	0	0.826815	0	5.11303	3.17e-07	#ERROR!
ALMS1P1	THAP9	0.27232	0	0.667131	6.66e-16	5.11058	3.21e-07	#ERROR!
LOC100506098	THAP9	0.19867	2.85e-11	0.621498	2.05e-13	5.10968	3.23e-07	#ERROR!
CIP2A	THAP9	0.393065	0	0.735904	0	5.1094	3.23e-07	#ERROR!
PABPC1	THAP9	0.373916	0	0.72543	0	5.10919	3.24e-07	#ERROR!
ATG16L1	THAP9	0.437178	0	0.759383	0	5.10893	3.24e-07	#ERROR!
MYO16	THAP9	0.18937	2.35e-10	-0.32241	0.000496	-5.10893	3.24e-07	#ERROR!
ADSS2	THAP9	0.525643	0	0.8041	0	5.10876	3.24e-07	#ERROR!
DGKH	THAP9	0.422654	0	0.75168	0	5.10767	3.26e-07	#ERROR!
RBM15-AS1	THAP9	0.258244	0	0.65844	2.22e-15	5.1071	3.27e-07	#ERROR!
TSR1	THAP9	0.551944	0	0.816732	0	5.10632	3.28e-07	#ERROR!
TMEM69	THAP9	0.543019	0	0.812403	0	5.10515	3.31e-07	#ERROR!
SOSTDC1	THAP9	0.102503	0.000655	0.556948	1.49e-10	5.10423	3.32e-07	#ERROR!
MDM4	THAP9	0.52896	0	0.805537	0	5.10376	3.33e-07	#ERROR!
LINC00582	THAP9	0.003229	0.914731	0.48431	5.48e-08	5.10264	3.35e-07	0/+
PARP11	THAP9	0.560741	0	0.820795	0	5.1023	3.36e-07	#ERROR!
TNFRSF13B	THAP9	-0.07607	0.011538	0.421125	3.41e-06	5.1017	3.37e-07	-/+
CTPS2	THAP9	0.527934	0	0.804956	0	5.10154	3.37e-07	#ERROR!
ADGRA3	THAP9	0.500321	0	0.791329	0	5.10139	3.37e-07	#ERROR!
CYP24A1	THAP9	0.061126	0.042484	0.527204	1.98e-09	5.09965	3.4e-07	#ERROR!
FBXO30	THAP9	0.604887	0	0.841345	0	5.09846	3.42e-07	#ERROR!
IGHV3-13	THAP9	0.017738	0.556385	0.494904	2.52e-08	5.09704	3.45e-07	0/+
PCDHB6	THAP9	0.162598	5.71e-08	0.597221	2.91e-12	5.09674	3.46e-07	#ERROR!
MITD1	THAP9	0.411425	0	0.745185	0	5.09627	3.46e-07	#ERROR!
HILPDA	THAP9	0.265806	0	-0.24711	0.008325	-5.09586	3.47e-07	#ERROR!
SEC16B	THAP9	0.201561	1.45e-11	0.622466	1.84e-13	5.09575	3.47e-07	#ERROR!
RERG	THAP9	0.353218	0	0.71325	0	5.09565	3.48e-07	#ERROR!
RFC4	THAP9	0.351084	0	0.712046	0	5.09557	3.48e-07	#ERROR!
TUBA4A	THAP9	-0.03015	0.317268	0.457764	3.44e-07	5.09556	3.48e-07	0/+
CLASP2	THAP9	0.653184	0	0.863112	0	5.09506	3.49e-07	#ERROR!
SAR1A	THAP9	0.578015	0	0.13411	0.156729	-5.09472	3.49e-07	#ERROR!
TAPT1-AS1	THAP9	0.376633	0	0.72622	0	5.09469	3.49e-07	#ERROR!
COL11A2	THAP9	-0.01208	0.688751	0.471867	1.32e-07	5.09466	3.49e-07	0/+
CDKN2C	THAP9	0.295123	0	-0.21684	0.02106	-5.09423	3.5e-07	#ERROR!
LIPG	THAP9	0.034178	0.256956	0.506923	1.01e-08	5.09311	3.52e-07	0/+
AOPEP	THAP9	0.163069	5.22e-08	0.597248	2.9e-12	5.09244	3.53e-07	#ERROR!
NDUFB4P11	THAP9	0.016842	0.5765	0.493867	2.72e-08	5.09242	3.54e-07	0/+
LOC101927870	THAP9	0.135828	6.04e-06	0.57902	1.84e-11	5.09238	3.54e-07	#ERROR!
LOC93429	THAP9	0.022991	0.445799	0.498481	1.92e-08	5.09213	3.54e-07	0/+
LRRC6	THAP9	0.28453	0	0.673314	4.44e-16	5.09104	3.56e-07	#ERROR!
BDNF	THAP9	0.241454	4.44e-16	0.647198	9.55e-15	5.09072	3.57e-07	#ERROR!
SLC44A5	THAP9	0.117985	8.64e-05	0.566679	6.05e-11	5.0901	3.58e-07	#ERROR!
EED	THAP9	0.45864	0	0.769727	0	5.09	3.58e-07	#ERROR!
LINC01563	THAP9	0.010625	0.724603	0.488926	3.92e-08	5.08954	3.59e-07	0/+
DDX18	THAP9	0.630474	0	0.852759	0	5.08911	3.6e-07	#ERROR!
KLRK1	THAP9	0.094565	0.001674	0.550289	2.72e-10	5.08881	3.6e-07	#ERROR!
ANKRD30A	THAP9	0.193698	8.92e-11	0.616951	3.43e-13	5.08827	3.61e-07	#ERROR!
PXMP4	THAP9	0.326398	0	0.697628	0	5.0881	3.62e-07	#ERROR!
SLITRK5	THAP9	0.084183	0.005168	0.542731	5.3e-10	5.08579	3.66e-07	#ERROR!
SMC1B	THAP9	0.179943	1.79e-09	0.607802	9.41e-13	5.08451	3.69e-07	#ERROR!
ATP6AP1L	THAP9	0.320754	0	0.694154	0	5.08389	3.7e-07	#ERROR!
CREBZF	THAP9	0.584499	0	0.831406	0	5.08352	3.7e-07	#ERROR!
THOC1	THAP9	0.523175	0	0.801966	0	5.08345	3.71e-07	#ERROR!
ABCA13	THAP9	0.094356	0.001714	0.549755	2.86e-10	5.08344	3.71e-07	#ERROR!
TTLL11	THAP9	0.37818	0	0.726514	0	5.08321	3.71e-07	#ERROR!
GPR12	THAP9	0.037918	0.208474	0.508935	8.62e-09	5.08306	3.71e-07	0/+
IKBKB	THAP9	0.373163	0	0.723713	0	5.08257	3.72e-07	#ERROR!
NRAD1	THAP9	0.039847	0.186236	0.510224	7.8e-09	5.08122	3.75e-07	0/+
MCAM	THAP9	0.115165	0.000127	-0.38621	2.39e-05	-5.07981	3.78e-07	#ERROR!
NSUN3	THAP9	0.665118	0	0.867984	0	5.07873	3.8e-07	#ERROR!
POPDC2	THAP9	0.201448	1.49e-11	0.621318	2.09e-13	5.07871	3.8e-07	#ERROR!
MED21	THAP9	0.611554	0	0.843817	0	5.07848	3.8e-07	#ERROR!
FASTKD2	THAP9	0.654493	0	0.863249	0	5.07806	3.81e-07	#ERROR!
MAP9	THAP9	0.502966	0	0.791751	0	5.07805	3.81e-07	#ERROR!
FNBP4	THAP9	0.61222	0	0.844098	0	5.07762	3.82e-07	#ERROR!
FAM234A	THAP9	0.141044	2.6e-06	-0.36339	7.62e-05	-5.07742	3.83e-07	#ERROR!
ABITRAM	THAP9	0.518451	0	0.799407	0	5.07717	3.83e-07	#ERROR!
ENTPD1-AS1	THAP9	0.526643	0	0.803386	0	5.07574	3.86e-07	#ERROR!
SLFN12	THAP9	0.275125	0	0.666766	8.88e-16	5.07474	3.88e-07	#ERROR!
[truncated: 28,370 more rows]

## Sheet: CHOL
Gene1	Gene2	TCGA_CHOL.PrimarySolidTumor_cor	TCGA_CHOL.PrimarySolidTumor_pVal	TCGA_CHOL.SolidTissueNormal_cor	TCGA_CHOL.SolidTissueNormal_pVal	zScoreDiff	pValDiff	Classes
PPP4R2	THAP9	0.459221	0.004842	1	0	4.706	2.53e-06	#ERROR!
DNAJB4	THAP9	0.446089	0.006393	0.983333	1.94e-06	4.1795	2.92e-05	#ERROR!
CFHR1	THAP9	-0.19959	0.243189	0.933333	0.000236	4.12741	3.67e-05	0/+
LPAR4	THAP9	0.521628	0.001104	-0.85716	0.003145	-4.07305	4.64e-05	#ERROR!
ADAMTS7P4	THAP9	0.263862	0.119945	-0.91147	0.000623	-3.95325	7.71e-05	0/-
DAP	THAP9	-0.06862	0.690885	0.933333	0.000236	3.83508	0.000126	0/+
IGSF9B	THAP9	0.464396	0.004327	-0.84758	0.003909	-3.83075	0.000128	#ERROR!
MFSD1	THAP9	0.374984	0.024232	0.966667	2.16e-05	3.59912	0.000319	#ERROR!
HSPB2	THAP9	0.291565	0.084462	-0.87208	0.00217	-3.59349	0.000326	0/-
FAM87B	THAP9	0.431735	0.008558	-0.81582	0.007336	-3.5152	0.000439	#ERROR!
COL16A1	THAP9	0.704345	1.64e-06	-0.61925	0.075347	-3.50087	0.000464	#ERROR!
PRR16	THAP9	0.496201	0.002085	-0.78333	0.01252	-3.49765	0.000469	#ERROR!
RCOR2	THAP9	0.57622	0.000235	-0.73333	0.024554	-3.4856	0.000491	#ERROR!
RNF216	THAP9	0.423688	0.010024	0.966667	2.16e-05	3.47226	0.000516	#ERROR!
C11orf54	THAP9	-0.01146	0.94712	0.916667	0.000507	3.4561	0.000548	0/+
LINC01605	THAP9	0.430774	0.008722	-0.80678	0.008594	-3.45473	0.000551	#ERROR!
CDO1	THAP9	-0.18157	0.289223	0.883333	0.001591	3.44546	0.00057	0/+
LTBP2	THAP9	0.601094	0.000106	-0.7	0.03577	-3.41879	0.000629	#ERROR!
IL17RD	THAP9	0.529162	0.000906	-0.75	0.019942	-3.4183	0.00063	#ERROR!
MMP12	THAP9	0.379528	0.022432	-0.82158	0.006603	-3.41665	0.000634	#ERROR!
NELL2	THAP9	0.228203	0.180688	-0.86667	0.002495	-3.39617	0.000683	0/-
HTR7	THAP9	0.102233	0.552973	-0.89541	0.001099	-3.39468	0.000687	0/-
NUDC	THAP9	-0.20933	0.22046	0.866667	0.002495	3.35279	0.0008	0/+
LEMD1-AS1	THAP9	0.280459	0.097559	-0.84633	0.004017	-3.35113	0.000805	0/-
BHMT	THAP9	-0.12792	0.457196	0.883333	0.001591	3.32512	0.000884	0/+
ANG	THAP9	-0.35481	0.033723	0.816667	0.007225	3.32141	0.000896	-/+
IL1RAPL2	THAP9	0.028339	0.86968	0.912142	0.000607	3.30854	0.000938	0/+
CCDC74B	THAP9	-0.02253	0.896231	-0.91084	0.000638	-3.30448	0.000952	0/-
PPM1B	THAP9	0.06347	0.71306	0.916667	0.000507	3.29193	0.000995	0/+
DCTN6	THAP9	0.181654	0.289002	0.933333	0.000236	3.28266	0.001028	0/+
DLX1	THAP9	0.446806	0.006298	-0.76694	0.015884	-3.26865	0.001081	#ERROR!
MEP1A	THAP9	0.151654	0.377271	0.927111	0.00032	3.24902	0.001158	0/+
LINC00921	THAP9	0.45928	0.004836	-0.75314	0.019142	-3.2315	0.001231	#ERROR!
ARG1	THAP9	-0.21671	0.204254	0.85	0.003705	3.23101	0.001234	0/+
EPHB3	THAP9	0.517927	0.001215	-0.71667	0.029818	-3.22643	0.001253	#ERROR!
CEROX1	THAP9	0.095152	0.580935	-0.87867	0.001816	-3.2069	0.001342	0/-
MGC27382	THAP9	-0.07216	0.6758	0.883333	0.001591	3.20182	0.001366	0/+
BOLA3-AS1	THAP9	0.597193	0.00012	-0.64708	0.059592	-3.1931	0.001408	#ERROR!
PDE4A	THAP9	0.591181	0.000147	-0.65	0.058073	-3.18379	0.001454	#ERROR!
FAIM2	THAP9	0.346241	0.038584	-0.79672	0.010156	-3.17496	0.001499	#ERROR!
ANAPC1P1	THAP9	0.309333	0.066385	-0.80678	0.008594	-3.14607	0.001655	0/-
CD3G	THAP9	0.165562	0.334548	-0.85356	0.003418	-3.14321	0.001671	0/-
BCL7C	THAP9	0.176891	0.302046	-0.85	0.003705	-3.14034	0.001688	0/-
CD1B	THAP9	0.136095	0.428684	-0.85977	0.002956	-3.12826	0.001758	0/-
LINC00670	THAP9	0.492317	0.002288	-0.70747	0.033013	-3.11036	0.001869	#ERROR!
ELP5	THAP9	-0.09771	0.570743	0.866667	0.002495	3.10233	0.00192	0/+
MCTS1	THAP9	-0.09688	0.574037	0.866667	0.002495	3.10049	0.001932	0/+
MEIS3	THAP9	0.390498	0.01854	-0.76282	0.016814	-3.09743	0.001952	#ERROR!
PGRMC1	THAP9	-0.02433	0.88798	0.883333	0.001591	3.0969	0.001956	0/+
DLK1	THAP9	0.06389	0.711241	-0.87398	0.002064	-3.09382	0.001976	0/-
OMD	THAP9	0.3811	0.021836	-0.76667	0.015944	-3.09353	0.001978	#ERROR!
AKR1C2	THAP9	-0.258	0.12871	0.816667	0.007225	3.0873	0.00202	0/+
CFAP65	THAP9	0.274924	0.104638	-0.81019	0.008103	-3.08529	0.002034	0/-
RAB14	THAP9	0.269585	0.11183	0.933333	0.000236	3.07973	0.002072	0/+
CCT8	THAP9	0.161699	0.346102	0.916667	0.000507	3.07401	0.002112	0/+
ADGRF5P1	THAP9	0.526627	0.000969	-0.67386	0.046568	-3.07101	0.002133	#ERROR!
ALG14	THAP9	-0.13068	0.447445	0.85	0.003705	3.03674	0.002392	0/+
LINC02323	THAP9	0.069163	0.688557	-0.86603	0.002536	-3.03377	0.002415	0/-
ACVR2B	THAP9	0.654156	1.51e-05	-0.53333	0.139227	-3.01427	0.002576	#ERROR!
B4GALNT4	THAP9	0.284261	0.092911	-0.79499	0.010445	-3.0139	0.002579	0/-
LOC102723701	THAP9	0.040096	0.8164	0.887037	0.001426	2.99329	0.00276	0/+
IMPG2	THAP9	0.411469	0.012659	-0.7258	0.026852	-2.97016	0.002976	#ERROR!
AMACR	THAP9	-0.3019	0.073537	0.778249	0.013506	2.96	0.003076	0/+
GEM	THAP9	0.475185	0.003404	-0.68333	0.042442	-2.95905	0.003086	#ERROR!
MGAT3	THAP9	0.571668	0.00027	-0.60506	0.084283	-2.95687	0.003108	#ERROR!
ANAPC15	THAP9	-0.33748	0.044128	0.761513	0.017117	2.95677	0.003109	-/+
HOXA4	THAP9	0.474586	0.00345	-0.6807	0.043566	-2.94657	0.003213	#ERROR!
MED19	THAP9	0.048925	0.776901	0.883333	0.001591	2.93648	0.00332	0/+
KLHL35	THAP9	0.150358	0.381412	-0.83063	0.005555	-2.93624	0.003322	0/-
ANKDD1A	THAP9	0.519634	0.001162	-0.64436	0.061033	-2.93572	0.003328	#ERROR!
PGM5P4-AS1	THAP9	0.016541	0.92372	-0.86603	0.002536	-2.91837	0.003519	0/-
DAZAP2	THAP9	0.234953	0.167782	0.916667	0.000507	2.90704	0.003649	0/+
HEYL	THAP9	0.424718	0.009826	-0.70294	0.03467	-2.90308	0.003695	#ERROR!
LLGL1	THAP9	0.428608	0.009104	-0.7	0.03577	-2.90084	0.003722	#ERROR!
LINC00866	THAP9	0.415648	0.011699	-0.70747	0.033013	-2.89874	0.003747	#ERROR!
CYP4F3	THAP9	-0.26328	0.1208	0.783333	0.01252	2.89663	0.003772	0/+
LY6G5C	THAP9	0.12376	0.472062	-0.83333	0.005266	-2.89615	0.003778	0/-
F13B	THAP9	-0.33628	0.044931	0.75	0.019942	2.89506	0.003791	-/+
FAM182A	THAP9	0.520509	0.001136	-0.63251	0.06755	-2.89459	0.003797	#ERROR!
CHPT1	THAP9	-0.17226	0.315091	0.816667	0.007225	2.89039	0.003848	0/+
MIR3150BHG	THAP9	0.532305	0.000833	-0.62106	0.074253	-2.88901	0.003865	#ERROR!
PRDM16-DT	THAP9	0.390756	0.018456	-0.71967	0.028819	-2.88807	0.003876	#ERROR!
RADX	THAP9	0.244866	0.150047	0.916667	0.000507	2.88402	0.003926	0/+
CLRN2	THAP9	-0.15335	0.371911	0.821584	0.006603	2.88059	0.003969	0/+
RNF138	THAP9	0.475314	0.003394	0.95	8.76e-05	2.87759	0.004007	#ERROR!
GRID2IP	THAP9	0.402343	0.014988	-0.70824	0.032739	-2.86713	0.004142	#ERROR!
ELFN1-AS1	THAP9	0.24845	0.143984	0.915999	0.000521	2.86655	0.00415	0/+
ACSBG2	THAP9	0.459058	0.004859	-0.67082	0.047945	-2.86333	0.004192	#ERROR!
ARHGEF28	THAP9	0.35906	0.031506	0.933333	0.000236	2.86222	0.004207	#ERROR!
FICD	THAP9	0.084331	0.62484	0.883333	0.001591	2.85864	0.004255	0/+
RNF112	THAP9	0.217486	0.202599	-0.79499	0.010445	-2.85787	0.004265	0/-
PAX8	THAP9	-0.28248	0.09507	0.766667	0.015944	2.85066	0.004363	0/+
HIF1A-AS3	THAP9	0.372427	0.025296	-0.72117	0.02833	-2.84793	0.0044	#ERROR!
HAUS7	THAP9	0.151449	0.377926	-0.81667	0.007225	-2.84363	0.00446	0/-
RBFOX3	THAP9	0.187405	0.273746	-0.80333	0.009111	-2.83973	0.004515	0/-
HOXD4	THAP9	0.351776	0.035384	-0.7303	0.025464	-2.83812	0.004538	#ERROR!
LINC02356	THAP9	-0.03024	0.861001	-0.86734	0.002453	-2.82756	0.00469	0/-
CELF4	THAP9	0.409788	0.013063	-0.69394	0.038109	-2.8251	0.004727	#ERROR!
CAMK2N2	THAP9	0.270925	0.109991	-0.76667	0.015944	-2.82328	0.004753	0/-
GALNT17	THAP9	0.304255	0.071208	-0.75	0.019942	-2.81695	0.004848	0/-
ANKRD65	THAP9	0.303573	0.071877	-0.75	0.019942	-2.8153	0.004873	0/-
PCDHGB1	THAP9	0.401996	0.015083	-0.69457	0.037864	-2.80731	0.004996	#ERROR!
CYP3A52P	THAP9	0.47894	0.003126	-0.63901	0.063924	-2.79714	0.005156	#ERROR!
RNF5	THAP9	-0.02189	0.89918	0.85	0.003705	2.797	0.005158	0/+
PHF24	THAP9	0.016881	0.922154	-0.85126	0.003602	-2.79599	0.005174	0/-
PDGFRA	THAP9	0.621564	5.21e-05	-0.5	0.170471	-2.79441	0.0052	#ERROR!
ADCYAP1R1	THAP9	0.33649	0.044789	-0.72804	0.026154	-2.78963	0.005277	#ERROR!
NOL11	THAP9	0.387641	0.019495	0.933333	0.000236	2.78953	0.005279	#ERROR!
CDCA2	THAP9	0.248648	0.143655	-0.76948	0.015326	-2.78604	0.005336	0/-
NOX4	THAP9	0.472122	0.003647	-0.63868	0.064106	-2.77663	0.005493	#ERROR!
RIOK2	THAP9	0.292372	0.083566	0.916667	0.000507	2.77194	0.005572	0/+
ALMS1-IT1	THAP9	0.172663	0.313932	0.893819	0.001156	2.77107	0.005587	0/+
NDUFB5	THAP9	0.054071	0.754122	0.866667	0.002495	2.76934	0.005617	0/+
OTUB1	THAP9	-0.2065	0.226909	0.783333	0.01252	2.76507	0.005691	0/+
LOC100506725	THAP9	0.405326	0.01419	-0.68201	0.043004	-2.76379	0.005713	#ERROR!
DFFB	THAP9	0.624308	4.72e-05	-0.48536	0.185354	-2.76191	0.005747	#ERROR!
ATP2B3	THAP9	0.42171	0.010416	-0.67082	0.047945	-2.7619	0.005747	#ERROR!
KIF7	THAP9	0.290073	0.086137	-0.74478	0.02132	-2.75701	0.005833	0/-
LOC101928058	THAP9	-0.1595	0.352774	0.8	0.009628	2.7564	0.005844	0/+
ARHGEF17	THAP9	0.636884	2.96e-05	-0.46667	0.205386	-2.7547	0.005875	#ERROR!
LOC101928069	THAP9	-0.0058	0.97324	0.848769	0.003807	2.75211	0.005921	0/+
EEF1A1P14	THAP9	0.017915	0.917403	-0.84533	0.004105	-2.752	0.005923	0/-
AMZ2	THAP9	-0.05742	0.739415	0.833333	0.005266	2.7497	0.005965	0/+
PALM	THAP9	0.364362	0.028908	-0.70294	0.03467	-2.74654	0.006023	#ERROR!
MGP	THAP9	0.445832	0.006427	-0.65	0.058073	-2.7461	0.006031	#ERROR!
ECEL1	THAP9	0.235298	0.167141	-0.76681	0.015912	-2.74074	0.00613	0/-
RN7SKP160	THAP9	0.065949	0.702355	-0.82933	0.005698	-2.74009	0.006142	0/-
AEBP1	THAP9	0.486257	0.002639	-0.61667	0.076929	-2.73728	0.006195	#ERROR!
ICAM5	THAP9	0.25609	0.131662	-0.75633	0.018354	-2.73454	0.006247	0/-
CTSD	THAP9	-0.26907	0.112543	0.75	0.019942	2.73304	0.006275	0/+
LINC01819	THAP9	0.461326	0.004627	-0.63355	0.066962	-2.72758	0.00638	#ERROR!
C1orf216	THAP9	0.414934	0.011858	-0.66667	0.049867	-2.72748	0.006382	#ERROR!
MCM8-AS1	THAP9	0.038759	0.822421	0.857794	0.003098	2.72722	0.006387	0/+
LOC100129503	THAP9	0.405512	0.014142	-0.67281	0.047039	-2.72708	0.00639	#ERROR!
RNU1-70P	THAP9	-0.18949	0.268355	0.783333	0.01252	2.72632	0.006405	0/+
LOC105369201	THAP9	0.215832	0.20614	-0.77232	0.014721	-2.72539	0.006423	0/-
F3	THAP9	0.188864	0.26996	-0.78333	0.01252	-2.7249	0.006432	0/-
BNIP3	THAP9	-0.04467	0.795859	0.833333	0.005266	2.72173	0.006494	0/+
FDCSP	THAP9	0.240531	0.157627	-0.7607	0.017306	-2.72079	0.006513	0/-
LOC101928053	THAP9	0.18224	0.287422	-0.78507	0.012195	-2.71976	0.006533	0/-
AR	THAP9	-0.18606	0.277277	0.783333	0.01252	2.71853	0.006557	0/+
GMNC	THAP9	0.130807	0.447004	0.878669	0.001816	2.7101	0.006726	0/+
KCTD17	THAP9	0.222337	0.192464	-0.76667	0.015944	-2.71003	0.006728	0/-
PRAF2	THAP9	0.090377	0.600142	-0.81667	0.007225	-2.70795	0.00677	0/-
GPR158	THAP9	0.028396	0.869418	0.852389	0.003511	2.70591	0.006812	0/+
CR2	THAP9	0.049994	0.772155	-0.82933	0.005698	-2.70506	0.006829	0/-
FCER1A	THAP9	0.088726	0.606844	-0.81667	0.007225	-2.7043	0.006845	0/-
DGCR6	THAP9	0.084208	0.625348	0.866667	0.002495	2.70307	0.00687	0/+
LINC01993	THAP9	0.140707	0.413054	-0.79799	0.009949	-2.70216	0.006889	0/-
LLCFC1	THAP9	0.305824	0.06969	-0.72457	0.027239	-2.69871	0.006961	0/-
LINC02884	THAP9	0.41541	0.011752	-0.65881	0.053638	-2.69807	0.006974	#ERROR!
GK3P	THAP9	0.357529	0.032291	-0.69488	0.037741	-2.69488	0.007041	#ERROR!
CABCOCO1	THAP9	0.327297	0.051352	-0.7113	0.031657	-2.69102	0.007123	0/-
CHCHD2	THAP9	-0.02961	0.863885	0.833333	0.005266	2.68872	0.007173	0/+
LOC388282	THAP9	-0.07114	0.680125	0.820091	0.006788	2.68826	0.007183	0/+
HERC2P7	THAP9	0.205138	0.230059	-0.76988	0.01524	-2.68776	0.007193	0/-
CBX2	THAP9	0.28336	0.093997	-0.73333	0.024554	-2.6858	0.007236	0/-
ATP2C2-AS1	THAP9	0.648438	1.9e-05	-0.42563	0.253381	-2.68561	0.00724	#ERROR!
HAGLR	THAP9	0.422361	0.010286	-0.64984	0.058155	-2.6822	0.007314	#ERROR!
CD28	THAP9	0.313526	0.0626	-0.71667	0.029818	-2.68137	0.007332	0/-
AKIRIN2	THAP9	0.166087	0.332994	0.883333	0.001591	2.67676	0.007434	0/+
LOC100420981	THAP9	0.568954	0.000294	-0.51883	0.152367	-2.67154	0.00755	#ERROR!
BMF	THAP9	0.338977	0.043135	-0.7	0.03577	-2.67049	0.007574	#ERROR!
ERP29	THAP9	-0.30885	0.066832	0.716667	0.029818	2.67005	0.007584	0/+
LOC100132834	THAP9	0.485554	0.002683	-0.59761	0.089224	-2.66922	0.007603	#ERROR!
ADH4	THAP9	-0.16272	0.343011	0.783333	0.01252	2.66587	0.007679	0/+
FTH1P10	THAP9	-0.20913	0.220925	0.762821	0.016814	2.65944	0.007827	0/+
IGLV2-33	THAP9	0.35217	0.035165	-0.68945	0.039906	-2.65867	0.007845	#ERROR!
EIF4A1P4	THAP9	0.210972	0.216788	-0.7615	0.01712	-2.65676	0.007889	0/-
GON7	THAP9	0.10526	0.541219	0.866667	0.002495	2.65658	0.007894	0/+
CCDC13-AS1	THAP9	0.371504	0.025689	-0.67544	0.045865	-2.64993	0.008051	#ERROR!
EFS	THAP9	0.510204	0.001478	-0.56904	0.109804	-2.64615	0.008141	#ERROR!
ACTR8	THAP9	0.344512	0.03963	0.916667	0.000507	2.6449	0.008171	#ERROR!
MICALL2	THAP9	0.356485	0.032835	-0.68333	0.042442	-2.64414	0.00819	#ERROR!
LRFN1	THAP9	0.406952	0.01377	-0.65	0.058073	-2.64208	0.00824	#ERROR!
NEK2	THAP9	0.335501	0.045461	-0.69502	0.037688	-2.64066	0.008274	#ERROR!
LOC100506274	THAP9	0.4648	0.004289	-0.60622	0.083533	-2.64007	0.008289	#ERROR!
ATP8A2	THAP9	0.120703	0.48316	-0.79499	0.010445	-2.63962	0.0083	0/-
MST1L	THAP9	0.191451	0.263331	-0.76667	0.015944	-2.63941	0.008305	0/-
DYDC2	THAP9	0.164656	0.337235	-0.77643	0.01387	-2.63167	0.008497	0/-
FTH1	THAP9	-0.18745	0.273633	0.766667	0.015944	2.63032	0.00853	0/+
ARHGAP44	THAP9	0.673318	6.8e-06	-0.36667	0.33174	-2.62917	0.008559	#ERROR!
FST	THAP9	0.189894	0.267308	0.883333	0.001591	2.62295	0.008717	0/+
MMP17	THAP9	0.014101	0.934946	-0.82846	0.005795	-2.62031	0.008785	0/-
DPM1	THAP9	0.246283	0.147629	0.895405	0.001099	2.61985	0.008797	0/+
NECTIN4	THAP9	0.497715	0.00201	-0.57145	0.10797	-2.61731	0.008863	#ERROR!
HOXA10	THAP9	0.233601	0.170313	0.892453	0.001207	2.61713	0.008867	0/+
COX16	THAP9	0.192726	0.260105	0.883333	0.001591	2.61651	0.008883	0/+
MEGF6	THAP9	0.501963	0.001813	-0.56667	0.111633	-2.61423	0.008943	#ERROR!
PCDHB9	THAP9	0.17084	0.319147	-0.76988	0.01524	-2.60994	0.009056	0/-
IGSF22	THAP9	0.08299	0.630376	-0.80335	0.009106	-2.60691	0.009136	0/-
MIR1915	THAP9	0.408537	0.013371	-0.63901	0.063924	-2.60509	0.009185	#ERROR!
LOC100421336	THAP9	0.518824	0.001187	-0.54772	0.12687	-2.604	0.009214	#ERROR!
PRELP	THAP9	0.516125	0.001272	-0.55	0.124977	-2.60306	0.00924	#ERROR!
PNMA8A	THAP9	0.212952	0.212404	-0.75	0.019942	-2.60261	0.009252	0/-
HMGCS2	THAP9	-0.09032	0.600355	0.8	0.009628	2.60253	0.009254	0/+
FHL3	THAP9	0.310911	0.06494	-0.7	0.03577	-2.60181	0.009273	0/-
FRMD5	THAP9	0.502222	0.001801	-0.56183	0.115413	-2.59945	0.009337	#ERROR!
MAMDC2	THAP9	0.493141	0.002244	-0.56904	0.109804	-2.59624	0.009425	#ERROR!
LRP1B	THAP9	-0.34604	0.038701	0.67783	0.044809	2.59564	0.009442	-/+
LINC01393	THAP9	0.290354	0.08582	-0.70964	0.032243	-2.59425	0.00948	0/-
PLXNA3	THAP9	0.334621	0.046066	-0.68333	0.042442	-2.5898	0.009603	#ERROR!
CDKN2AIPNL	THAP9	-0.16918	0.32395	0.766667	0.015944	2.58902	0.009625	0/+
MCAM	THAP9	0.702929	1.75e-06	-0.3	0.432845	-2.58809	0.009651	#ERROR!
CHST10	THAP9	0.168469	0.326009	-0.76667	0.015944	-2.58743	0.00967	0/-
FAM24B	THAP9	0.152737	0.373836	-0.77314	0.014549	-2.58686	0.009686	0/-
F13A1	THAP9	0.491696	0.002322	-0.56667	0.111633	-2.58439	0.009755	#ERROR!
MRPL54	THAP9	-0.3587	0.03169	0.666667	0.049867	2.58267	0.009804	-/+
APCDD1L-DT	THAP9	0.399588	0.015759	-0.63901	0.063924	-2.58168	0.009832	#ERROR!
DENND5B	THAP9	0.139427	0.417359	0.866667	0.002495	2.58066	0.009861	0/+
KIF6	THAP9	0.004443	0.979484	0.828459	0.005795	2.57972	0.009888	0/+
ITIH5	THAP9	0.382491	0.021319	-0.65	0.058073	-2.57866	0.009919	#ERROR!
MXRA8	THAP9	0.449179	0.005994	-0.6	0.087623	-2.57547	0.01001	#ERROR!
C15orf39	THAP9	0.659672	1.21e-05	-0.36667	0.33174	-2.57543	0.010012	#ERROR!
PPP1R3D	THAP9	0.380658	0.022002	-0.65	0.058073	-2.57396	0.010054	#ERROR!
FGF7	THAP9	0.400799	0.015416	-0.63599	0.065595	-2.5737	0.010062	#ERROR!
GGN	THAP9	0.317166	0.059453	-0.68952	0.03988	-2.57265	0.010092	0/-
PAX8-AS1	THAP9	-0.29818	0.077329	0.7	0.03577	2.57111	0.010137	0/+
FARS2	THAP9	0.082266	0.633373	0.85	0.003705	2.56865	0.01021	0/+
LINGO1	THAP9	0.583017	0.00019	-0.46667	0.205386	-2.56672	0.010266	#ERROR!
LOC101929494	THAP9	0.030041	0.861924	-0.81515	0.007424	-2.56548	0.010303	0/-
ASXL3	THAP9	-0.23081	0.175615	0.733333	0.024554	2.56263	0.010388	0/+
PCDHB14	THAP9	0.223882	0.189312	-0.73641	0.023655	-2.56126	0.010429	0/-
DHRS1	THAP9	0.086643	0.615345	0.85	0.003705	2.559	0.010497	0/+
DDC	THAP9	-0.06929	0.688016	0.8	0.009628	2.5562	0.010582	0/+
HOXC13	THAP9	0.413979	0.012075	-0.62106	0.074253	-2.55427	0.010641	#ERROR!
IFITM1	THAP9	0.191439	0.263363	-0.75	0.019942	-2.55351	0.010664	0/-
LINC01801	THAP9	0.599769	0.000111	-0.44039	0.235491	-2.55069	0.010751	#ERROR!
PYY2	THAP9	0.358846	0.031615	-0.65828	0.053897	-2.55034	0.010762	#ERROR!
DKK3	THAP9	0.497715	0.00201	-0.55	0.124977	-2.54883	0.010808	#ERROR!
DKK1	THAP9	0.057945	0.737111	0.840366	0.004561	2.54831	0.010825	0/+
HDGFL3	THAP9	0.577277	0.000228	-0.46667	0.205386	-2.54779	0.010841	#ERROR!
LMX1B	THAP9	0.180478	0.29219	-0.75366	0.019013	-2.54709	0.010863	0/-
PTGES	THAP9	0.243595	0.152242	-0.72357	0.027557	-2.54673	0.010874	0/-
PCDHB13	THAP9	0.149211	0.385093	-0.76667	0.015944	-2.54419	0.010953	0/-
PAQR8	THAP9	0.513164	0.001372	-0.53333	0.139227	-2.54262	0.011002	#ERROR!
RHEBL1	THAP9	0.41195	0.012545	-0.61667	0.076929	-2.53334	0.011298	#ERROR!
GYS2	THAP9	-0.05838	0.735194	0.8	0.009628	2.53224	0.011334	0/+
ELN	THAP9	0.410814	0.012815	-0.61667	0.076929	-2.53035	0.011395	#ERROR!
EFEMP1	THAP9	0.432314	0.008459	-0.6	0.087623	-2.52966	0.011417	#ERROR!
GTF2H3	THAP9	0.102491	0.551966	0.85	0.003705	2.524	0.011603	0/+
RN7SL684P	THAP9	-0.49156	0.00233	0.547723	0.12687	2.52387	0.011607	-/0
PSMB8-AS1	THAP9	-0.10274	0.551014	-0.85	0.003705	-2.52346	0.011621	0/-
LOXL1	THAP9	0.276666	0.10237	-0.7	0.03577	-2.51977	0.011743	0/-
CPS1	THAP9	-0.05208	0.762902	0.8	0.009628	2.5184	0.011789	0/+
MAFB	THAP9	-0.00283	0.98692	0.816667	0.007225	2.51581	0.011876	0/+
KYNU	THAP9	-0.20856	0.222206	0.733333	0.024554	2.51146	0.012023	0/+
PCGF2	THAP9	0.401931	0.015101	-0.61667	0.076929	-2.50706	0.012174	#ERROR!
RGL2	THAP9	0.423688	0.010024	-0.6	0.087623	-2.50655	0.012192	#ERROR!
FOXB1	THAP9	0.222952	0.191204	-0.72457	0.027239	-2.50356	0.012295	0/-
PPP1R14A	THAP9	0.297779	0.077752	-0.68333	0.042442	-2.50019	0.012413	0/-
BIN1	THAP9	-0.54741	0.00055	0.483333	0.18747	2.49927	0.012445	-/0
PEA15	THAP9	0.515224	0.001302	-0.51667	0.15439	-2.49839	0.012476	#ERROR!
RFLNA	THAP9	0.431239	0.008642	-0.59076	0.093922	-2.49546	0.012579	#ERROR!
GGT6	THAP9	0.649649	1.81e-05	-0.35	0.35582	-2.49519	0.012589	#ERROR!
INMT	THAP9	0.23381	0.16992	-0.71667	0.029818	-2.49265	0.012679	0/-
LINC00487	THAP9	0.278015	0.100638	-0.69204	0.038865	-2.48918	0.012804	0/-
RBPJ	THAP9	0.497715	0.00201	0.933333	0.000236	2.48917	0.012804	#ERROR!
HSPA2	THAP9	0.378886	0.022679	-0.62762	0.070365	-2.48666	0.012895	#ERROR!
RASD2	THAP9	0.255022	0.133336	-0.70294	0.03467	-2.48145	0.013085	0/-
NPIPA3	THAP9	0.074516	0.665799	-0.78507	0.012195	-2.4798	0.013146	0/-
NNAT	THAP9	0.524791	0.001016	-0.5	0.170471	-2.4779	0.013216	#ERROR!
LYPD2	THAP9	0.04484	0.795112	-0.79499	0.010445	-2.47237	0.013422	0/-
C9orf50	THAP9	0.374166	0.024568	-0.62689	0.07079	-2.472	0.013436	#ERROR!
CPXM2	THAP9	0.430539	0.008763	-0.58333	0.099186	-2.46876	0.013558	#ERROR!
EFNA3	THAP9	0.320458	0.056717	-0.6615	0.052329	-2.46781	0.013594	0/0
BOLA2P2	THAP9	0.44406	0.006667	-0.57097	0.108336	-2.46477	0.01371	#ERROR!
LINC01907	THAP9	0.081877	0.634984	-0.77942	0.013274	-2.46417	0.013733	0/-
GDPD5	THAP9	0.282588	0.094935	-0.68333	0.042442	-2.46389	0.013744	0/-
ATL2	THAP9	0.506984	0.001602	0.933333	0.000236	2.46204	0.013815	#ERROR!
GRAP2	THAP9	0.424773	0.009815	-0.58578	0.097434	-2.46145	0.013838	#ERROR!
INAFM2	THAP9	0.150132	0.382135	-0.75	0.019942	-2.46038	0.013879	0/-
PNMA1	THAP9	0.427164	0.009366	-0.58333	0.099186	-2.45971	0.013905	#ERROR!
HSCB	THAP9	-0.28055	0.09745	0.683333	0.042442	2.45904	0.013931	0/+
LTBP4	THAP9	0.591052	0.000147	-0.41667	0.264586	-2.45754	0.013989	#ERROR!
APOC1	THAP9	-0.44635	0.006359	0.566667	0.111633	2.45709	0.014007	-/0
ENAH	THAP9	0.639459	2.69e-05	-0.35	0.35582	-2.45704	0.014009	#ERROR!
GLI2	THAP9	0.357777	0.032162	-0.63333	0.067086	-2.45396	0.014129	#ERROR!
LDLRAD2	THAP9	0.315064	0.061254	-0.66109	0.052523	-2.45312	0.014162	0/0
MPP2	THAP9	0.313417	0.062695	-0.66109	0.052523	-2.44912	0.014321	0/0
NBPF3	THAP9	0.613869	6.84e-05	-0.38333	0.308495	-2.44908	0.014322	#ERROR!
DPYSL3	THAP9	0.355069	0.033585	-0.63333	0.067086	-2.44717	0.014398	#ERROR!
ADGRB1	THAP9	0.355051	0.033595	-0.63333	0.067086	-2.44713	0.0144	#ERROR!
GDPD3	THAP9	0.275285	0.104165	-0.68333	0.042442	-2.44656	0.014423	0/-
ANKRD34B	THAP9	-0.08553	0.619917	0.774597	0.014246	2.44556	0.014463	0/+
DNAH2	THAP9	0.474796	0.003434	-0.53783	0.135289	-2.44532	0.014472	#ERROR!
ARNT2	THAP9	0.352881	0.034772	-0.63333	0.067086	-2.4417	0.014618	#ERROR!
CHKB	THAP9	0.296511	0.079087	-0.66946	0.048568	-2.44118	0.014639	0/-
GNRH1	THAP9	0.344408	0.039693	-0.63868	0.064106	-2.44023	0.014678	#ERROR!
FMO2	THAP9	0.272323	0.108096	-0.68333	0.042442	-2.43955	0.014705	0/-
PRDM8	THAP9	0.187041	0.274694	-0.72804	0.026154	-2.43758	0.014786	0/-
IRX6	THAP9	0.181521	0.289361	-0.7303	0.025464	-2.43563	0.014866	0/-
LOC440300	THAP9	0.283405	0.093942	-0.67584	0.045687	-2.43535	0.014877	0/-
CNKSR3	THAP9	0.426135	0.009557	0.916667	0.000507	2.43489	0.014896	#ERROR!
LOC101929076	THAP9	0.180543	0.292011	-0.7303	0.025464	-2.43341	0.014957	0/-
FRMPD3	THAP9	0.151005	0.379342	-0.74383	0.021575	-2.43182	0.015023	0/-
PLEKHG5	THAP9	0.524784	0.001017	-0.48333	0.18747	-2.42977	0.015108	#ERROR!
LRRC17	THAP9	0.322668	0.054937	-0.65	0.058073	-2.42907	0.015138	0/0
HSPB9	THAP9	0.277359	0.101477	-0.67783	0.044809	-2.42904	0.015139	0/-
IGLC6	THAP9	0.138945	0.418988	-0.74853	0.020323	-2.42806	0.01518	0/-
CCL11	THAP9	0.451083	0.005759	-0.55332	0.122249	-2.42751	0.015203	#ERROR!
MIRLET7BHG	THAP9	0.17127	0.317911	-0.73333	0.024554	-2.42678	0.015233	0/-
PCOLCE-AS1	THAP9	0.468025	0.003995	-0.53783	0.135289	-2.42627	0.015255	#ERROR!
HOXD8	THAP9	0.350084	0.036338	-0.63027	0.06883	-2.42357	0.015369	#ERROR!
NFE2	THAP9	0.353365	0.034506	-0.62721	0.070605	-2.42067	0.015492	#ERROR!
CLDN11	THAP9	0.168544	0.32579	-0.73333	0.024554	-2.42064	0.015493	0/-
RAB3C	THAP9	0.143575	0.403498	-0.74478	0.02132	-2.41982	0.015528	0/-
PLXNB3	THAP9	0.438751	0.007432	-0.56067	0.116327	-2.4172	0.01564	#ERROR!
LINC01146	THAP9	-0.291	0.085098	0.666667	0.049867	2.41692	0.015652	0/+
RN7SL510P	THAP9	0.453379	0.005486	-0.54772	0.12687	-2.41626	0.015681	#ERROR!
LOC101927811	THAP9	0.343185	0.040449	-0.63269	0.067452	-2.41519	0.015727	#ERROR!
NRIP2	THAP9	0.550277	0.000507	-0.45	0.224216	-2.41497	0.015737	#ERROR!
PHF19	THAP9	0.316318	0.060175	-0.65	0.058073	-2.41359	0.015796	0/0
FUT11	THAP9	0.468293	0.003971	-0.53333	0.139227	-2.41321	0.015813	#ERROR!
RALYL	THAP9	0.025876	0.88092	-0.79167	0.01101	-2.41122	0.015899	0/-
FXN	THAP9	0.097592	0.571228	0.833333	0.005266	2.40964	0.015968	0/+
CYBRD1	THAP9	0.428709	0.009086	-0.56667	0.111633	-2.40935	0.015981	#ERROR!
FLNC	THAP9	0.386378	0.01993	-0.6	0.087623	-2.40885	0.016003	#ERROR!
ENTHD1	THAP9	0.242316	0.154473	-0.69282	0.038554	-2.40865	0.016012	0/-
RNF128	THAP9	-0.28684	0.089861	0.666667	0.049867	2.40699	0.016085	0/+
ADAMTS10	THAP9	0.465074	0.004263	-0.53333	0.139227	-2.4042	0.016208	#ERROR!
RN7SL364P	THAP9	0.167291	0.329453	-0.7303	0.025464	-2.40351	0.016239	0/-
MRPL45	THAP9	0.048536	0.778632	0.816667	0.007225	2.40331	0.016247	0/+
PBLD	THAP9	0.000772	0.996433	0.8	0.009628	2.40263	0.016278	0/+
NUGGC	THAP9	-0.15945	0.35293	0.733333	0.024554	2.40019	0.016386	0/+
NEK11	THAP9	0.463628	0.004401	-0.53333	0.139227	-2.40017	0.016388	#ERROR!
AKNA	THAP9	0.358955	0.031559	-0.61667	0.076929	-2.39705	0.016527	#ERROR!
FAM160B1	THAP9	0.361635	0.030221	0.9	0.000943	2.39303	0.01671	#ERROR!
GATA2	THAP9	0.442227	0.006923	-0.55	0.124977	-2.39286	0.016718	#ERROR!
GTF2H2C	THAP9	0.461692	0.00459	0.92051	0.000431	2.39181	0.016765	#ERROR!
CDH11	THAP9	0.495526	0.002119	-0.5	0.170471	-2.3913	0.016789	#ERROR!
AP3S2	THAP9	0.223238	0.190621	0.866667	0.002495	2.39087	0.016809	0/+
DGKA	THAP9	0.460251	0.004736	-0.53333	0.139227	-2.39077	0.016813	#ERROR!
GNG8	THAP9	0.267736	0.114405	-0.67386	0.046568	-2.39029	0.016835	0/-
MAPK13	THAP9	0.511361	0.001436	-0.48333	0.18747	-2.38962	0.016866	#ERROR!
KISS1	THAP9	0.162437	0.343876	-0.72892	0.025884	-2.38614	0.017026	0/-
PDGFB	THAP9	0.476534	0.003302	-0.51667	0.15439	-2.38606	0.01703	#ERROR!
LAMC1-AS1	THAP9	0.495426	0.002124	-0.49793	0.172532	-2.38498	0.01708	#ERROR!
PRELID3A	THAP9	0.363075	0.029522	-0.61026	0.08094	-2.38493	0.017082	#ERROR!
LOC105375431	THAP9	0.047619	0.782711	-0.77825	0.013506	-2.38234	0.017203	0/-
MRPL36	THAP9	-0.32868	0.050321	0.633333	0.067086	2.38176	0.01723	0/0
ADAM8	THAP9	0.352623	0.034914	-0.61667	0.076929	-2.38119	0.017257	#ERROR!
NPM1P38	THAP9	0.157216	0.359814	-0.7303	0.025464	-2.38086	0.017272	0/-
ECRG4	THAP9	0.505603	0.001658	-0.48536	0.185354	-2.37842	0.017387	#ERROR!
KLHDC8B	THAP9	0.396163	0.016762	-0.58333	0.099186	-2.37801	0.017406	#ERROR!
LOXL1-AS1	THAP9	0.235741	0.16632	-0.6891	0.04005	-2.37781	0.017416	0/-
GPRC5C	THAP9	-0.27383	0.106078	0.666667	0.049867	2.37611	0.017496	0/+
OR51E2	THAP9	0.304262	0.071202	-0.64742	0.059417	-2.37463	0.017567	0/0
MAMSTR	THAP9	0.462857	0.004475	-0.5255	0.14624	-2.37419	0.017587	#ERROR!
NFATC4	THAP9	0.394361	0.017312	-0.58333	0.099186	-2.37333	0.017628	#ERROR!
HTR4	THAP9	0.471224	0.003721	-0.51702	0.154056	-2.37214	0.017685	#ERROR!
ASB15	THAP9	0.079316	0.64564	0.821584	0.006603	2.36837	0.017866	0/+
LOC105371084	THAP9	0.567536	0.000306	-0.4122	0.270263	-2.36828	0.017871	#ERROR!
MRPL53	THAP9	0.189403	0.268569	-0.7113	0.031657	-2.36694	0.017936	0/-
CAPN9	THAP9	0.134698	0.433482	-0.73786	0.023237	-2.36643	0.017961	0/-
CEMIP	THAP9	0.549247	0.000522	-0.43333	0.243952	-2.36642	0.017961	#ERROR!
LINC01833	THAP9	0.15059	0.380669	-0.7303	0.025464	-2.36601	0.017981	0/-
LINC00671	THAP9	-0.10051	0.559725	0.753145	0.019142	2.36584	0.017989	0/+
MDFI	THAP9	0.313872	0.062295	-0.63868	0.064106	-2.36528	0.018017	0/0
RDH14	THAP9	0.173801	0.310704	0.85	0.003705	2.36483	0.018038	0/+
ARL10	THAP9	0.408201	0.013455	-0.56904	0.109804	-2.36261	0.018147	#ERROR!
ALDH1A1	THAP9	0.019826	0.908627	0.8	0.009628	2.36092	0.01823	0/+
CRACR2B	THAP9	0.319665	0.057367	-0.63333	0.067086	-2.35973	0.018288	0/0
DUOX1	THAP9	0.32857	0.050401	-0.62721	0.070605	-2.35926	0.018311	0/0
JPH1	THAP9	0.31992	0.057157	-0.63296	0.067296	-2.35899	0.018325	0/0
MFGE8	THAP9	0.483553	0.002811	-0.5	0.170471	-2.35684	0.018431	#ERROR!
MTMR11	THAP9	0.408497	0.013381	-0.56667	0.111633	-2.35572	0.018487	#ERROR!
LOC646870	THAP9	0.129766	0.45066	-0.73786	0.023237	-2.35544	0.018501	0/-
PPP1R26P1	THAP9	0.359438	0.031314	-0.60381	0.085104	-2.35343	0.018601	#ERROR!
LINC00571	THAP9	0.000968	0.995529	0.791669	0.01101	2.35246	0.01865	0/+
DNASE1L1	THAP9	0.23999	0.158593	0.866667	0.002495	2.35213	0.018666	0/+
KIAA1614	THAP9	0.054461	0.752405	-0.76988	0.01524	-2.35166	0.01869	0/-
GLI1	THAP9	0.290368	0.085804	-0.65	0.058073	-2.35104	0.018721	0/0
FAM110A	THAP9	0.47055	0.003777	-0.51046	0.160267	-2.35075	0.018736	#ERROR!
ERH	THAP9	0.240618	0.157472	0.866667	0.002495	2.35067	0.01874	0/+
CDH7	THAP9	0.019723	0.909102	-0.78262	0.012654	-2.34571	0.018991	0/-
BET1	THAP9	0.194927	0.254596	0.853564	0.003418	2.34539	0.019007	0/+
PROK1	THAP9	0.141552	0.410227	0.837882	0.004802	2.34501	0.019026	0/+
LINC02188	THAP9	0.339183	0.043	-0.61559	0.077596	-2.34397	0.01908	#ERROR!
LOC100506869	THAP9	0.241332	0.156206	-0.6773	0.045043	-2.34233	0.019164	0/-
HSPB7	THAP9	0.541433	0.000649	-0.43333	0.243952	-2.34208	0.019177	#ERROR!
MTCO3P38	THAP9	-0.42595	0.009592	0.547723	0.12687	2.34184	0.019189	-/0
LOC101927911	THAP9	0.65754	1.32e-05	-0.27386	0.475797	-2.34061	0.019252	#ERROR!
LIFR-AS1	THAP9	0.355593	0.033306	-0.60252	0.085953	-2.33933	0.019318	#ERROR!
ABHD10	THAP9	-0.01494	0.931103	0.783333	0.01252	2.33924	0.019323	0/+
MSLN	THAP9	0.355003	0.03362	-0.60252	0.085953	-2.33786	0.019395	#ERROR!
CNKSR2	THAP9	0.016694	0.923018	0.794986	0.010445	2.33763	0.019406	0/+
ACTL10	THAP9	0.135831	0.429589	-0.73112	0.025215	-2.33689	0.019445	0/-
HCP5	THAP9	-0.03128	0.85627	-0.8	0.009628	-2.33583	0.0195	0/-
PDGFC	THAP9	0.384294	0.020665	0.9	0.000943	2.33542	0.019521	#ERROR!
LMCD1	THAP9	0.508658	0.001536	-0.46667	0.205386	-2.33452	0.019569	#ERROR!
MTCO1P17	THAP9	0.347227	0.037997	-0.60622	0.083533	-2.33121	0.019742	#ERROR!
ANKS4B	THAP9	-0.25452	0.134125	0.666667	0.049867	2.33067	0.019771	0/+
FOXC2	THAP9	0.432885	0.008364	-0.53783	0.135289	-2.32976	0.019819	#ERROR!
GTF2IRD2P1	THAP9	0.244342	0.15095	-0.67229	0.047275	-2.32923	0.019847	0/-
LOC100286922	THAP9	-0.24351	0.152387	0.672293	0.047275	2.3273	0.01995	0/+
LOC100507071	THAP9	0.548109	0.000539	-0.41992	0.260488	-2.32697	0.019967	#ERROR!
GASK1B	THAP9	0.520536	0.001136	-0.45	0.224216	-2.3237	0.020142	#ERROR!
RASGRF1	THAP9	0.128492	0.455154	-0.73112	0.025215	-2.32054	0.020312	0/-
PTPRE	THAP9	0.487061	0.00259	-0.48333	0.18747	-2.31877	0.020407	#ERROR!
LAMTOR5	THAP9	-0.12295	0.474997	0.733333	0.024554	2.31866	0.020413	0/+
DIAPH2-AS1	THAP9	0.171501	0.317249	0.843274	0.00429	2.31804	0.020447	0/+
IGF1R	THAP9	0.531703	0.000846	-0.43515	0.241757	-2.31708	0.0205	#ERROR!
LINC00163	THAP9	0.416619	0.011485	-0.54772	0.12687	-2.317	0.020504	#ERROR!
ORC5	THAP9	0.08793	0.610084	0.816667	0.007225	2.31668	0.020521	0/+
MYOZ1	THAP9	0.409826	0.013054	-0.55332	0.122249	-2.31664	0.020523	#ERROR!
PRPF31	THAP9	-0.15603	0.363481	0.716667	0.029818	2.31561	0.02058	0/+
ADRA2C	THAP9	0.275249	0.104211	-0.65	0.058073	-2.31507	0.020609	0/0
RFESD	THAP9	0.179552	0.294715	0.845196	0.004117	2.3145	0.020641	0/+
ANGPTL6	THAP9	-0.32522	0.05294	0.616667	0.076929	2.31342	0.0207	0/0
KARS1	THAP9	0.196717	0.250174	0.85	0.003705	2.31289	0.020728	0/+
LXN	THAP9	0.24654	0.147193	-0.66667	0.049867	-2.31203	0.020776	0/-
ASAP1	THAP9	0.559768	0.000386	-0.4	0.286105	-2.31138	0.020812	#ERROR!
LUM	THAP9	0.449694	0.00593	-0.51667	0.15439	-2.31128	0.020818	#ERROR!
OSR1	THAP9	0.241035	0.156731	-0.66946	0.048568	-2.31027	0.020873	0/-
ACSM5	THAP9	-0.04313	0.802753	0.766667	0.015944	2.30964	0.020908	0/+
LINC02206	THAP9	0.066081	0.701785	-0.75698	0.018196	-2.30948	0.020917	0/-
H4C5	THAP9	0.29915	0.076329	-0.63252	0.067548	-2.3071	0.02105	0/0
DACT1	THAP9	0.447921	0.006154	-0.51667	0.15439	-2.30642	0.021087	#ERROR!
IL4	THAP9	0.168783	0.325094	-0.70809	0.032793	-2.30614	0.021103	0/-
NAP1L6P	THAP9	0.227699	0.18168	-0.67552	0.045826	-2.30361	0.021244	0/-
PRKCQ	THAP9	0.296144	0.079476	-0.63333	0.067086	-2.30285	0.021287	0/0
NTRK2	THAP9	0.366422	0.027947	-0.58333	0.099186	-2.30183	0.021344	#ERROR!
HRH1	THAP9	0.415245	0.011789	-0.54394	0.130055	-2.30157	0.021359	#ERROR!
FOXF1	THAP9	0.294599	0.081133	-0.63333	0.067086	-2.29915	0.021497	0/0
ABCG8	THAP9	-0.24081	0.15713	0.666667	0.049867	2.2987	0.021522	0/+
IER3	THAP9	0.342195	0.041068	-0.6	0.087623	-2.29732	0.0216	#ERROR!
KRT8P5	THAP9	-0.2328	0.171833	0.67082	0.047945	2.29657	0.021644	0/+
PKD1P4	THAP9	0.531994	0.00084	-0.42678	0.251957	-2.29547	0.021706	#ERROR!
EXD1	THAP9	-0.13073	0.447267	0.724569	0.027239	2.29504	0.021731	0/+
CTLA4	THAP9	0.292716	0.083187	-0.63333	0.067086	-2.29464	0.021754	0/0
HSPB1	THAP9	0.036176	0.834084	-0.76667	0.015944	-2.29439	0.021768	0/-
PLA2G3	THAP9	-0.12831	0.455804	0.724569	0.027239	2.28965	0.022042	0/+
PROX1	THAP9	0.478919	0.003127	0.916667	0.000507	2.28954	0.022048	#ERROR!
IRS1	THAP9	0.266881	0.115611	0.866667	0.002495	2.28923	0.022066	0/+
PTX4	THAP9	0.330088	0.049283	-0.60622	0.083533	-2.28884	0.022089	#ERROR!
CCDC58	THAP9	-0.07158	0.678246	0.75	0.019942	2.28624	0.02224	0/+
KCNH2	THAP9	0.421517	0.010455	-0.53333	0.139227	-2.28551	0.022283	#ERROR!
KRT18P5	THAP9	0.401027	0.015352	-0.55048	0.124578	-2.28468	0.022332	#ERROR!
KRBA1	THAP9	0.336788	0.044588	-0.6	0.087623	-2.28395	0.022374	#ERROR!
ANO9	THAP9	0.358416	0.031834	-0.58333	0.099186	-2.28167	0.022509	#ERROR!
ARMCX2	THAP9	0.311941	0.06401	-0.61667	0.076929	-2.28108	0.022544	0/0
FMOD	THAP9	0.419697	0.010828	-0.53333	0.139227	-2.28068	0.022568	#ERROR!
LEFTY2	THAP9	0.28779	0.088752	-0.63269	0.067452	-2.28051	0.022578	0/0
QDPR	THAP9	-0.02974	0.86329	0.766667	0.015944	2.28029	0.02259	0/+
BTN2A3P	THAP9	0.517543	0.001227	-0.43699	0.239545	-2.27929	0.02265	#ERROR!
LINC01085	THAP9	0.304418	0.071049	-0.62106	0.074253	-2.27847	0.022698	0/0
FAM120C	THAP9	0.271727	0.108902	0.866667	0.002495	2.2778	0.022739	0/+
ATP2C2	THAP9	0.464109	0.004355	-0.4916	0.178927	-2.27757	0.022752	#ERROR!
AKR1D1	THAP9	-0.16981	0.322114	0.7	0.03577	2.27336	0.023005	0/+
GLI3	THAP9	0.2575	0.129476	-0.65	0.058073	-2.27326	0.023011	0/0
MRPL20	THAP9	0.159521	0.352725	0.833333	0.005266	2.27178	0.0231	0/+
CCDC112	THAP9	0.476473	0.003306	-0.47699	0.194179	-2.27056	0.023174	#ERROR!
DLG4	THAP9	0.441383	0.007044	-0.51046	0.160267	-2.27015	0.023199	#ERROR!
CRNKL1	THAP9	0.486128	0.002647	0.916667	0.000507	2.26897	0.02327	#ERROR!
ICOS	THAP9	0.079856	0.643389	-0.74268	0.021891	-2.26827	0.023313	0/-
ECSCR	THAP9	0.11099	0.519296	-0.72804	0.026154	-2.26727	0.023374	0/-
GXYLT1P6	THAP9	-0.19241	0.260897	0.686198	0.041242	2.26636	0.023429	0/+
MFAP4	THAP9	0.254522	0.134125	-0.65	0.058073	-2.26629	0.023434	0/0
RNASE1	THAP9	0.305632	0.069874	-0.61667	0.076929	-2.26582	0.023462	0/0
LPO	THAP9	0.546236	0.000568	-0.39652	0.290709	-2.25966	0.023842	#ERROR!
PRR5-ARHGAP8	THAP9	0.519369	0.001171	-0.42762	0.250928	-2.25953	0.023851	#ERROR!
KLHDC7B	THAP9	-0.10561	0.539871	-0.81368	0.007622	-2.25812	0.023938	0/-
GREM1	THAP9	0.370518	0.026115	-0.56667	0.111633	-2.25771	0.023964	#ERROR!
ERI3-IT1	THAP9	0.610795	7.61e-05	-0.31053	0.416049	-2.25705	0.024005	#ERROR!
LGI4	THAP9	0.301918	0.073518	-0.61667	0.076929	-2.25687	0.024016	0/0
LINC01361	THAP9	0.129724	0.450808	0.821584	0.006603	2.25681	0.02402	0/+
PRSS16	THAP9	0.267911	0.114159	-0.63868	0.064106	-2.25536	0.024111	0/0
KCNRG	THAP9	-0.02382	0.890314	0.764293	0.016477	2.25478	0.024147	0/+
FLRT1	THAP9	0.363168	0.029477	-0.57145	0.10797	-2.2546	0.024158	#ERROR!
RGS11	THAP9	0.527359	0.00095	-0.41667	0.264586	-2.25445	0.024168	#ERROR!
CBLN2	THAP9	0.191842	0.26234	-0.6836	0.04233	-2.25435	0.024174	0/-
RASL11B	THAP9	0.446662	0.006317	-0.5	0.170471	-2.25378	0.02421	#ERROR!
POM121L9P	THAP9	0.154302	0.368898	-0.70294	0.03467	-2.25115	0.024376	0/-
MTND2P13	THAP9	0.110646	0.5206	-0.72457	0.027239	-2.25043	0.024421	0/-
ERVMER34-1	THAP9	0.47589	0.00335	-0.47024	0.201468	-2.24986	0.024458	#ERROR!
CROT	THAP9	0.284022	0.093198	0.866667	0.002495	2.24864	0.024536	0/+
KU-MEL-3	THAP9	0.097624	0.571104	-0.7303	0.025464	-2.24825	0.02456	0/-
FBLN1	THAP9	0.272932	0.107279	-0.63333	0.067086	-2.24758	0.024603	0/0
PELI1	THAP9	0.712456	1.09e-06	-0.13333	0.732368	-2.24603	0.024702	#ERROR!
MYEOV	THAP9	0.188655	0.270499	-0.68333	0.042442	-2.24602	0.024702	0/-
PLAC9	THAP9	0.296704	0.078882	-0.61667	0.076929	-2.24433	0.024811	0/0
LURAP1L-AS1	THAP9	0.342947	0.040597	0.881483	0.001677	2.24311	0.02489	#ERROR!
LINC00940	THAP9	0.188519	0.27085	-0.68201	0.043004	-2.24029	0.025072	0/-
LOC100289518	THAP9	0.506002	0.001641	-0.43515	0.241757	-2.24009	0.025085	#ERROR!
RNF11	THAP9	0.174574	0.308525	0.833333	0.005266	2.23789	0.025228	0/+
PPIAP39	THAP9	0.435645	0.007913	-0.50444	0.166098	-2.23684	0.025297	#ERROR!
CYTH3	THAP9	0.520888	0.001125	-0.41667	0.264586	-2.23492	0.025422	#ERROR!
AQP9	THAP9	-0.00901	0.958395	0.766667	0.015944	2.23491	0.025423	0/+
DLX4	THAP9	0.231428	0.174437	-0.65578	0.055138	-2.23461	0.025443	0/0
PODN	THAP9	0.292262	0.083688	-0.61667	0.076929	-2.23369	0.025504	0/0
LOC339260	THAP9	0.357479	0.032317	-0.56904	0.109804	-2.23249	0.025583	#ERROR!
RNU1-73P	THAP9	-0.09045	0.599853	0.730297	0.025464	2.2324	0.025588	0/+
PLEKHA4	THAP9	0.360476	0.030794	-0.56667	0.111633	-2.23235	0.025592	#ERROR!
CMTM1	THAP9	0.350209	0.036267	-0.57389	0.106132	-2.23004	0.025745	#ERROR!
PPFIA1P1	THAP9	0.383213	0.021055	-0.54772	0.12687	-2.22996	0.02575	#ERROR!
ITM2C	THAP9	0.472095	0.003649	-0.46667	0.205386	-2.22913	0.025805	#ERROR!
RN7SL614P	THAP9	0.368696	0.026917	-0.55902	0.117646	-2.22859	0.025841	#ERROR!
PPFIA3	THAP9	0.149617	0.383788	-0.7	0.03577	-2.228	0.02588	0/-
CTBP2	THAP9	0.532861	0.00082	-0.4	0.286105	-2.22742	0.025919	#ERROR!
BMERB1	THAP9	-0.00541	0.975032	0.766667	0.015944	2.22702	0.025946	0/+
COL15A1	THAP9	0.487544	0.002561	-0.45	0.224216	-2.22688	0.025955	#ERROR!
INHA	THAP9	0.544612	0.000595	-0.38494	0.306299	-2.22469	0.026102	#ERROR!
COL1A2	THAP9	0.417509	0.011292	-0.51667	0.15439	-2.22451	0.026114	#ERROR!
COQ5	THAP9	-0.0036	0.983353	0.766667	0.015944	2.22307	0.026211	0/+
BNC2-AS1	THAP9	-0.03541	0.837565	-0.78222	0.012732	-2.22272	0.026235	0/-
NOC4L	THAP9	-0.20779	0.223962	0.666667	0.049867	2.2226	0.026243	0/+
FRMD6-AS1	THAP9	0.40112	0.015326	-0.53009	0.142107	-2.22188	0.026291	#ERROR!
GLUD1P2	THAP9	0.244452	0.15076	-0.64436	0.061033	-2.22153	0.026315	0/0
PBX4	THAP9	0.284997	0.092032	-0.61667	0.076929	-2.21634	0.026668	0/0
ANTXR1	THAP9	0.529128	0.000906	-0.4	0.286105	-2.21604	0.026689	#ERROR!
CLEC12A-AS1	THAP9	0.042055	0.807592	-0.74833	0.020376	-2.21309	0.026892	0/-
ATP8B2	THAP9	0.258127	0.128513	-0.63333	0.067086	-2.21272	0.026917	0/0
LINC00933	THAP9	0.288899	0.087474	-0.6129	0.079268	-2.21241	0.026938	0/0
NWD2	THAP9	0.017203	0.920675	0.773137	0.014549	2.2123	0.026946	0/+
CRADD	THAP9	0.088317	0.60851	0.8	0.009628	2.21053	0.027068	0/+
MRPS34	THAP9	-0.14162	0.410013	0.7	0.03577	2.21011	0.027097	0/+
QSOX1	THAP9	0.4972	0.002035	-0.43333	0.243952	-2.20945	0.027143	#ERROR!
B3GNT9	THAP9	0.329321	0.049845	-0.58333	0.099186	-2.20944	0.027144	#ERROR!
PPIAL4D	THAP9	-0.37512	0.024176	0.547723	0.12687	2.20928	0.027155	-/0
ATG16L2	THAP9	0.579981	0.000209	-0.33333	0.380713	-2.20822	0.027229	#ERROR!
PTPRR	THAP9	0.29848	0.077022	-0.60506	0.084283	-2.20808	0.027238	0/0
REC8	THAP9	0.107757	0.531611	-0.71667	0.029818	-2.20806	0.02724	0/-
FAM43A	THAP9	0.429473	0.00895	-0.5	0.170471	-2.20723	0.027298	#ERROR!
HEATR9	THAP9	0.228325	0.18045	-0.64984	0.058154	-2.20481	0.027468	0/0
AHCYL1	THAP9	0.004892	0.977409	0.766667	0.015944	2.20448	0.027491	0/+
CCDC110	THAP9	0.446391	0.006353	-0.48305	0.187771	-2.20412	0.027516	#ERROR!
NHLRC4	THAP9	0.416613	0.011486	-0.51046	0.160267	-2.2037	0.027545	#ERROR!
GFI1B	THAP9	0.36573	0.028267	-0.55328	0.122277	-2.20292	0.027601	#ERROR!
MTND2P32	THAP9	-0.3726	0.025224	0.547723	0.12687	2.20285	0.027605	-/0
KNG1	THAP9	-0.22699	0.183088	0.65	0.058073	2.20231	0.027643	0/0
RADIL	THAP9	0.487634	0.002556	-0.44074	0.235069	-2.20186	0.027675	#ERROR!
LOC101927556	THAP9	0.306115	0.069411	-0.59786	0.089061	-2.20176	0.027682	0/0
LIPE	THAP9	0.348162	0.037447	-0.56667	0.111633	-2.20153	0.027699	#ERROR!
PLXND1	THAP9	0.427293	0.009343	-0.5	0.170471	-2.20139	0.027709	#ERROR!
EIF4H	THAP9	0.435275	0.007973	0.9	0.000943	2.20127	0.027717	#ERROR!
NBEAP2	THAP9	0.484712	0.002736	-0.44352	0.231784	-2.20104	0.027733	#ERROR!
LINC00517	THAP9	0.525289	0.001003	-0.39841	0.288204	-2.20026	0.027788	#ERROR!
AMT	THAP9	0.245768	0.148505	0.85	0.003705	2.19999	0.027807	0/+
PDGFRB	THAP9	0.493595	0.002219	-0.43333	0.243952	-2.199	0.027878	#ERROR!
PECR	THAP9	0.008111	0.962555	0.766667	0.015944	2.19743	0.02799	0/+
NES	THAP9	0.443515	0.006742	-0.48333	0.18747	-2.19709	0.028014	#ERROR!
ACOT12	THAP9	-0.40701	0.013755	0.516667	0.15439	2.19684	0.028032	-/0
MAP3K12	THAP9	0.215513	0.206826	-0.65549	0.055284	-2.19683	0.028033	0/0
DUSP26	THAP9	0.282291	0.095298	-0.6129	0.079268	-2.19667	0.028044	0/0
CRYL1	THAP9	0.094754	0.582527	0.8	0.009628	2.19632	0.028069	0/+
GATC	THAP9	-0.06089	0.724237	0.736408	0.023655	2.19629	0.028071	0/+
PLCL1	THAP9	0.475694	0.003365	-0.45	0.224216	-2.19311	0.0283	#ERROR!
MTND2P29	THAP9	-0.26856	0.113248	0.621059	0.074253	2.19297	0.028309	0/0
DSG2-AS1	THAP9	-0.25802	0.128678	0.627621	0.070365	2.19171	0.0284	0/0
PGM3	THAP9	0.144577	0.400191	0.816667	0.007225	2.19098	0.028454	0/+
EVA1A	THAP9	-0.16428	0.338341	0.683333	0.042442	2.19097	0.028454	0/+
NR5A2	THAP9	0.681429	4.76e-06	0.95	8.76e-05	2.18851	0.028632	#ERROR!
LSM3	THAP9	-0.06334	0.713618	0.733333	0.024554	2.18703	0.02874	0/+
CCR7	THAP9	0.067984	0.693606	-0.73113	0.025213	-2.18682	0.028755	0/-
LAG3	THAP9	0.157095	0.360189	-0.6862	0.041242	-2.18663	0.02877	0/-
FHL1	THAP9	0.402704	0.01489	-0.51667	0.15439	-2.18556	0.028848	#ERROR!
LINC01562	THAP9	-0.18131	0.289937	0.672493	0.047184	2.18547	0.028854	0/+
LINC02579	THAP9	0.401357	0.01526	-0.51755	0.153564	-2.18468	0.028912	#ERROR!
FLJ20712	THAP9	0.324008	0.05388	-0.57975	0.101786	-2.18458	0.02892	0/0
CACNA1C	THAP9	0.559804	0.000385	-0.35	0.35582	-2.18411	0.028954	#ERROR!
MRPL50	THAP9	0.374509	0.024426	0.883333	0.001591	2.18212	0.029101	#ERROR!
CYP3A4	THAP9	-0.16029	0.350367	0.683333	0.042442	2.182	0.029109	0/+
ADRA1D	THAP9	0.42907	0.009021	-0.4916	0.178927	-2.18176	0.029127	#ERROR!
ITGA9-AS1	THAP9	0.444444	0.006614	-0.47699	0.194179	-2.18158	0.02914	#ERROR!
MAP3K6	THAP9	0.294303	0.081452	-0.6	0.087623	-2.18067	0.029208	0/0
LDLRAD3	THAP9	0.294046	0.081732	-0.6	0.087623	-2.18005	0.029254	0/0
ACAD10	THAP9	-0.05993	0.728426	0.733333	0.024554	2.17954	0.029291	0/+
PCK1	THAP9	-0.09463	0.583041	0.716667	0.029818	2.17902	0.02933	0/+
CNNM1	THAP9	0.098236	0.56868	-0.71431	0.030617	-2.17643	0.029523	0/-
OR10AD1	THAP9	0.233303	0.170875	-0.63901	0.063924	-2.17576	0.029573	0/0
DTNB	THAP9	0.104667	0.543512	0.8	0.009628	2.17441	0.029674	0/+
MNAT1	THAP9	0.31518	0.061154	0.866667	0.002495	2.17372	0.029726	0/+
LOC100288637	THAP9	0.481331	0.002959	-0.43699	0.239545	-2.17367	0.02973	#ERROR!
KLRC1	THAP9	-0.06769	0.694851	0.72804	0.026154	2.17174	0.029875	0/+
MYRIP	THAP9	-0.12296	0.47494	0.7	0.03577	2.16857	0.030116	0/+
CD40LG	THAP9	0.098705	0.566827	-0.71197	0.031425	-2.16703	0.030232	0/-
PRAMEF11	THAP9	-0.3064	0.069136	0.587181	0.096439	2.16645	0.030277	0/0
PSAP	THAP9	0.318764	0.058112	0.866667	0.002495	2.16499	0.030388	0/+
ANGPT1	THAP9	0.413431	0.0122	-0.5	0.170471	-2.16454	0.030423	#ERROR!
PCTP	THAP9	0.065598	0.703865	0.783333	0.01252	2.16278	0.030558	0/+
KCNH4	THAP9	0.251418	0.139102	-0.62385	0.072583	-2.1627	0.030564	0/0
CXorf65	THAP9	0.276502	0.102581	-0.60704	0.083002	-2.16248	0.030582	0/0
LINC00536	THAP9	0.356226	0.032971	-0.54772	0.12687	-2.16154	0.030654	#ERROR!
PITHD1	THAP9	-0.05163	0.764925	0.733333	0.024554	2.16131	0.030672	0/+
RANGRF	THAP9	0.086391	0.616377	-0.71667	0.029818	-2.16085	0.030707	0/-
PRLH	THAP9	-0.07003	0.684857	0.724569	0.027239	2.1608	0.030711	0/+
ALDH8A1	THAP9	-0.23574	0.16632	0.633333	0.067086	2.16054	0.030731	0/0
GRAMD1A	THAP9	0.261345	0.123651	-0.61667	0.076929	-2.1604	0.030741	0/0
PRG4	THAP9	-0.20857	0.222176	0.65	0.058073	2.16001	0.030772	0/0
IQCD	THAP9	0.112814	0.512409	-0.70294	0.03467	-2.15869	0.030875	0/-
CACNA1C-AS2	THAP9	0.207318	0.225037	-0.65034	0.0579	-2.15841	0.030896	0/0
CD5	THAP9	0.084997	0.6221	-0.71667	0.029818	-2.15778	0.030945	0/-
LOC101927845	THAP9	-0.06773	0.694688	0.724569	0.027239	2.15575	0.031103	0/+
PDCD1	THAP9	0.228947	0.179233	-0.63599	0.065595	-2.15455	0.031197	0/0
GNB3	THAP9	0.454065	0.005407	-0.45769	0.215412	-2.15392	0.031246	#ERROR!
C11orf1	THAP9	0.069649	0.686479	0.783333	0.01252	2.15388	0.03125	0/+
ADAMTS2	THAP9	0.347345	0.037927	-0.55231	0.123077	-2.15374	0.031261	#ERROR!
ANKRD13C	THAP9	0.45317	0.005511	0.9	0.000943	2.15247	0.03136	#ERROR!
IGSF10	THAP9	0.257695	0.129176	-0.61667	0.076929	-2.15184	0.03141	0/0
EFHC2	THAP9	0.310474	0.065338	-0.57975	0.101786	-2.15164	0.031425	0/0
CCDC59	THAP9	0.212952	0.212404	0.833333	0.005266	2.15061	0.031507	0/+
CILP2	THAP9	0.388592	0.019173	-0.51667	0.15439	-2.14894	0.031639	#ERROR!
PLEKHN1	THAP9	0.348268	0.037385	-0.55	0.124977	-2.14879	0.031651	#ERROR!
NTRK1	THAP9	-0.05003	0.771998	-0.77464	0.014236	-2.1486	0.031666	0/-
RAET1E	THAP9	0.286122	0.0907	-0.59628	0.090125	-2.14845	0.031678	0/0
CT66	THAP9	0.064326	0.709357	-0.72457	0.027239	-2.14826	0.031693	0/-
ADH1A	THAP9	-0.08016	0.642112	0.716667	0.029818	2.14712	0.031783	0/+
KIF5A	THAP9	0.523724	0.001045	-0.37954	0.313717	-2.14687	0.031804	#ERROR!
POMP	THAP9	-0.00772	0.964337	0.75	0.019942	2.14622	0.031855	0/+
HRK	THAP9	0.285125	0.091879	-0.59628	0.090125	-2.14608	0.031867	0/0
GAS6-DT	THAP9	0.559748	0.000386	-0.33473	0.378595	-2.14607	0.031867	#ERROR!
CENPF	THAP9	0.29971	0.075753	-0.58578	0.097434	-2.14565	0.031901	0/0
MAML2	THAP9	0.689025	3.38e-06	-0.13333	0.732368	-2.14523	0.031934	#ERROR!
NUP62CL	THAP9	0.253267	0.13612	0.845196	0.004117	2.14515	0.031941	0/+
GBA3	THAP9	-0.0065	0.969971	0.75	0.019942	2.14355	0.032069	0/+
CACNA1G	THAP9	0.017017	0.921531	-0.74536	0.021164	-2.14351	0.032072	0/-
ANKRD13B	THAP9	0.36387	0.029141	-0.53557	0.137262	-2.14312	0.032104	#ERROR!
LINC00658	THAP9	0.384403	0.020626	-0.51755	0.153564	-2.1408	0.03229	#ERROR!
NMD3	THAP9	0.529643	0.000894	0.916667	0.000507	2.14057	0.032309	#ERROR!
JAK1	THAP9	-0.17136	0.317668	0.666667	0.049867	2.13988	0.032365	0/+
HTR2B	THAP9	0.352093	0.035207	-0.54394	0.130055	-2.1394	0.032403	#ERROR!
RNGTT	THAP9	0.218231	0.201019	0.833333	0.005266	2.1385	0.032476	0/+
CTSK	THAP9	0.384318	0.020657	-0.51667	0.15439	-2.13795	0.032521	#ERROR!
BABAM2	THAP9	-0.04068	0.813749	0.733333	0.024554	2.13731	0.032573	0/+
CREB3L2	THAP9	0.392018	0.018048	0.883333	0.001591	2.1372	0.032582	#ERROR!
CTNNB1	THAP9	0.530801	0.000867	0.916667	0.000507	2.13705	0.032594	#ERROR!
APOE	THAP9	-0.40296	0.01482	0.5	0.170471	2.13704	0.032595	-/0
PTGER4	THAP9	0.383907	0.020804	-0.51667	0.15439	-2.13689	0.032607	#ERROR!
LMOD1	THAP9	0.45523	0.005275	-0.45	0.224216	-2.13593	0.032685	#ERROR!
CMA1	THAP9	0.215805	0.206198	-0.63868	0.064106	-2.13421	0.032826	0/0
DPH5	THAP9	-0.1926	0.260429	0.652725	0.056677	2.13394	0.032848	0/0
AQP10	THAP9	0.12988	0.450258	-0.6881	0.040457	-2.13371	0.032867	0/-
FZD7	THAP9	0.530158	0.000882	-0.36667	0.33174	-2.13364	0.032872	#ERROR!
OR6L2P	THAP9	0.344415	0.039689	-0.54772	0.12687	-2.13207	0.033001	#ERROR!
CDKN2D	THAP9	0.319943	0.057138	-0.56667	0.111633	-2.132	0.033007	0/0
DBET	THAP9	0.024641	0.886565	-0.73952	0.022768	-2.13176	0.033027	0/-
BMPR1AP1	THAP9	0.469979	0.003826	-0.43323	0.244078	-2.1314	0.033056	#ERROR!
PSMA6	THAP9	0.332539	0.047522	0.866667	0.002495	2.13127	0.033067	#ERROR!
CDK5	THAP9	-0.07274	0.673304	0.716667	0.029818	2.13079	0.033106	0/+
PPARA	THAP9	0.171612	0.31693	0.816667	0.007225	2.13029	0.033148	0/+
HRG	THAP9	-0.13673	0.426505	0.683333	0.042442	2.12927	0.033232	0/+
PAFAH1B3	THAP9	0.230834	0.175578	-0.62762	0.070365	-2.12843	0.033301	0/0
DNAJC30	THAP9	-0.1894	0.268569	0.652725	0.056677	2.12668	0.033447	0/0
PPM1K-DT	THAP9	0.240605	0.157496	-0.62075	0.074438	-2.12645	0.033466	0/0
MRM1	THAP9	-0.06399	0.710814	0.719672	0.028819	2.12512	0.033576	0/+
ISCU	THAP9	-0.13453	0.434045	0.683333	0.042442	2.12437	0.033639	0/+
MIR5091	THAP9	0.340894	0.041894	-0.54772	0.12687	-2.12334	0.033725	#ERROR!
BCLAF1	THAP9	0.613067	7.03e-05	0.933333	0.000236	2.12247	0.033798	#ERROR!
PRAMEF4	THAP9	-0.19483	0.254837	0.648138	0.059039	2.12161	0.03387	0/0
CMBL	THAP9	0.043386	0.801623	0.766667	0.015944	2.12017	0.033991	0/+
ADAM33	THAP9	0.181379	0.289745	-0.65549	0.055284	-2.11905	0.034086	0/0
ANKRD33	THAP9	0.041167	0.81158	-0.72908	0.025834	-2.11837	0.034144	0/-
GLIS1	THAP9	0.141337	0.410945	-0.67806	0.044707	-2.11806	0.03417	0/-
CPA4	THAP9	0.287813	0.088724	-0.58583	0.097398	-2.11732	0.034233	0/0
BCAS2	THAP9	-0.03116	0.856855	0.733333	0.024554	2.11643	0.034308	0/+
GPR1	THAP9	0.464458	0.004321	-0.43323	0.244078	-2.11595	0.034349	#ERROR!
COL4A1	THAP9	0.447892	0.006157	-0.45	0.224216	-2.11576	0.034365	#ERROR!
NR1D1	THAP9	0.430797	0.008718	-0.46667	0.205386	-2.11557	0.034381	#ERROR!
QRFPR	THAP9	0.093031	0.589431	-0.703	0.034644	-2.11523	0.034411	0/-
HFM1	THAP9	0.325214	0.052942	-0.55701	0.119257	-2.11398	0.034517	0/0
CPB2	THAP9	0.179594	0.294597	0.816667	0.007225	2.11226	0.034664	0/+
CRLF1	THAP9	0.264778	0.118618	-0.6	0.087623	-2.11056	0.03481	0/0
KRT6B	THAP9	0.390203	0.018637	-0.50224	0.168255	-2.11046	0.034819	#ERROR!
ARHGAP30	THAP9	0.288271	0.088196	-0.58333	0.099186	-2.11011	0.034849	0/0
HNRNPA3P9	THAP9	0.445901	0.006418	0.894427	0.001134	2.10986	0.034871	#ERROR!
EYA4	THAP9	0.023547	0.891573	0.756329	0.018354	2.10978	0.034877	0/+
ANXA10	THAP9	-0.33247	0.047568	0.55	0.124977	2.10969	0.034885	-/0
NBEAL2	THAP9	0.549083	0.000524	-0.33333	0.380713	-2.10893	0.03495	#ERROR!
MXRA7	THAP9	0.157322	0.359486	-0.66667	0.049867	-2.10831	0.035004	0/-
NOTCH3	THAP9	0.535436	0.000765	-0.35	0.35582	-2.10792	0.035038	#ERROR!
DLGAP3	THAP9	0.105792	0.539163	-0.69457	0.037864	-2.10734	0.035088	0/-
N4BP2	THAP9	0.285163	0.091835	0.85	0.003705	2.10722	0.035098	0/+
ERRFI1	THAP9	0.285291	0.091682	0.85	0.003705	2.10692	0.035125	0/+
BCAR4	THAP9	-0.36577	0.028249	0.521749	0.149669	2.10593	0.03521	-/0
ORC3	THAP9	0.182427	0.286921	0.816667	0.007225	2.10585	0.035217	0/+
AKAP5	THAP9	0.120734	0.483046	-0.6862	0.041242	-2.10548	0.03525	0/-
LINC01687	THAP9	-0.13603	0.428894	0.67783	0.044809	2.10528	0.035267	0/+
IGLV1-36	THAP9	0.316824	0.059743	-0.56067	0.116327	-2.10519	0.035275	0/0
NYAP1	THAP9	0.413818	0.012111	-0.47901	0.192031	-2.10513	0.03528	#ERROR!
NUDT15	THAP9	0.058449	0.734907	0.769881	0.01524	2.10429	0.035353	0/+
CDK3	THAP9	0.287031	0.089634	-0.58233	0.099914	-2.10381	0.035395	0/0
LAS1L	THAP9	0.011715	0.945933	0.75	0.019942	2.10368	0.035407	0/+
G6PC	THAP9	-0.0936	0.587167	0.7	0.03577	2.10352	0.03542	0/+
BEND2	THAP9	-0.07862	0.648536	0.707475	0.033013	2.10292	0.035472	0/+
C12orf66	THAP9	0.471096	0.003732	0.9	0.000943	2.10259	0.035502	#ERROR!
DDT	THAP9	-0.26135	0.123651	0.6	0.087623	2.10249	0.03551	0/0
CA5AP1	THAP9	-0.04306	0.803068	0.724569	0.027239	2.10159	0.035589	0/+
RAB5IF	THAP9	-0.28465	0.092449	0.583333	0.099186	2.10147	0.035599	0/0
MSS51	THAP9	0.503091	0.001763	-0.38494	0.306299	-2.0994	0.035782	#ERROR!
LOC101926964	THAP9	0.250314	0.140903	-0.60622	0.083533	-2.09805	0.035901	0/0
IGLV3-19	THAP9	0.181303	0.289951	-0.65	0.058073	-2.09796	0.035908	0/0
C4BPAP2	THAP9	0.040957	0.812526	-0.72457	0.027239	-2.09697	0.035996	0/-
IDH3B	THAP9	-0.05729	0.739979	0.716667	0.029818	2.09683	0.036009	0/+
MSC-AS1	THAP9	0.234067	0.169437	-0.61667	0.076929	-2.0968	0.036011	0/0
C17orf64	THAP9	0.317033	0.059566	-0.55777	0.118641	-2.09646	0.036042	0/0
BBS7	THAP9	0.55037	0.000506	-0.32636	0.39136	-2.09585	0.036095	#ERROR!
LOC100422497	THAP9	0.075094	0.663362	0.775058	0.014151	2.09579	0.036101	0/+
GCC1	THAP9	0.290055	0.086159	0.85	0.003705	2.09555	0.036122	0/+
NUTM2B	THAP9	0.296555	0.07904	-0.57284	0.10692	-2.09544	0.036132	0/0
RANBP9	THAP9	0.408497	0.013381	0.883333	0.001591	2.09425	0.036238	#ERROR!
KCNJ6	THAP9	0.226215	0.184621	-0.62106	0.074253	-2.09423	0.036239	0/0
GPSM1	THAP9	0.150885	0.379724	-0.66667	0.049867	-2.09388	0.03627	0/-
FAH	THAP9	-0.20663	0.226613	0.633333	0.067086	2.09355	0.0363	0/0
CRIP2	THAP9	0.325845	0.052456	-0.55	0.124977	-2.09342	0.036312	0/0
F7	THAP9	-0.08897	0.605866	0.7	0.03577	2.09331	0.036322	0/+
MGAT4C	THAP9	0.281017	0.096866	-0.58333	0.099186	-2.09284	0.036364	0/0
MPC1L	THAP9	0.026828	0.876575	-0.7303	0.025464	-2.09264	0.036381	0/-
CTBP1-AS	THAP9	0.485644	0.002677	-0.40168	0.2839	-2.09219	0.036421	#ERROR!
LINGO3	THAP9	0.139268	0.417895	-0.67229	0.047275	-2.09023	0.036597	0/-
AP2B1P1	THAP9	0.441272	0.00706	-0.44721	0.227453	-2.09007	0.036612	#ERROR!
MED28P3	THAP9	0.40004	0.01563	0.880631	0.001718	2.08975	0.03664	#ERROR!
FTCDNL1	THAP9	-0.0533	0.75754	0.716667	0.029818	2.08806	0.036792	0/+
NACAP5	THAP9	0.326566	0.051906	-0.54772	0.12687	-2.08805	0.036793	0/0
CCL19	THAP9	0.018156	0.916296	-0.73333	0.024554	-2.08796	0.036801	0/-
KLHL38	THAP9	0.579774	0.000211	-0.28373	0.459374	-2.08752	0.036841	#ERROR!
LAMA4	THAP9	0.437464	0.007628	-0.45	0.224216	-2.08737	0.036854	#ERROR!
MEPE	THAP9	0.338609	0.043377	-0.53785	0.135273	-2.08707	0.036882	#ERROR!
ERLEC1	THAP9	0.293788	0.082012	0.85	0.003705	2.08662	0.036923	0/+
CALHM2	THAP9	0.451883	0.005663	-0.43515	0.241757	-2.08629	0.036952	#ERROR!
C1D	THAP9	0.411602	0.012627	0.883333	0.001591	2.08608	0.036971	#ERROR!
DOC2B	THAP9	0.254265	0.134533	-0.6	0.087623	-2.08589	0.036988	0/0
CDH13	THAP9	0.453299	0.005496	-0.43333	0.243952	-2.08529	0.037043	#ERROR!
CSDE1	THAP9	0.100805	0.558564	0.783333	0.01252	2.08519	0.037052	0/+
OGN	THAP9	0.330135	0.049249	-0.54394	0.130055	-2.08501	0.037068	#ERROR!
CXCR3	THAP9	0.062585	0.716896	-0.7113	0.031657	-2.08451	0.037113	0/-
GABRB3	THAP9	-0.08497	0.62219	0.7	0.03577	2.08451	0.037114	0/+
NPY	THAP9	0.023088	0.893674	-0.7303	0.025464	-2.08445	0.037119	0/-
PCDHB4	THAP9	0.165969	0.333343	-0.65549	0.055284	-2.08428	0.037135	0/0
MAPK3	THAP9	0.277198	0.101683	-0.58333	0.099186	-2.08377	0.037181	0/0
DUSP10	THAP9	0.021114	0.902721	0.75	0.019942	2.0831	0.037242	0/+
DNAJB9	THAP9	0.06038	0.726479	0.766667	0.015944	2.08288	0.037262	0/+
FABP4	THAP9	0.115828	0.501131	-0.68333	0.042442	-2.08278	0.037271	0/-
ATOH7	THAP9	0.169878	0.321919	-0.65273	0.056677	-2.08252	0.037295	0/0
PSMA2	THAP9	0.021757	0.89977	0.75	0.019942	2.08169	0.037371	0/+
ANLN	THAP9	0.227115	0.182833	-0.61667	0.076929	-2.08073	0.037459	0/0
CLUH	THAP9	0.061538	0.721438	0.766667	0.015944	2.08034	0.037495	0/+
GOLGA5	THAP9	0.353547	0.034407	0.866667	0.002495	2.07916	0.037603	#ERROR!
PKN2	THAP9	0.353911	0.034209	0.866667	0.002495	2.07825	0.037686	#ERROR!
HK1	THAP9	0.416736	0.011459	-0.46667	0.205386	-2.07806	0.037703	#ERROR!
CASQ2	THAP9	0.471073	0.003733	-0.41178	0.270805	-2.07733	0.037771	#ERROR!
JCADP1	THAP9	0.739383	2.59e-07	0	1	-2.07715	0.037788	#ERROR!
ADAMTSL2	THAP9	0.319171	0.057775	-0.55	0.124977	-2.07712	0.03779	0/0
ABCA6	THAP9	0.063152	0.714437	0.766667	0.015944	2.07679	0.037821	0/+
MRC2	THAP9	0.433501	0.008261	-0.45	0.224216	-2.07667	0.037832	#ERROR!
PCDH8	THAP9	0.321889	0.055559	-0.54772	0.12687	-2.07662	0.037837	0/0
LOC100130748	THAP9	-0.01936	0.910787	0.730297	0.025464	2.07628	0.037868	0/+
RAPGEF3	THAP9	0.487673	0.002553	-0.39331	0.29499	-2.07626	0.03787	#ERROR!
MRPL58	THAP9	-0.11226	0.514485	0.683333	0.042442	2.07487	0.037998	0/+
MIR573	THAP9	0.497482	0.002022	-0.38126	0.311336	-2.07359	0.038117	#ERROR!
NTS	THAP9	-0.09319	0.588801	-0.77825	0.013506	-2.07351	0.038125	0/-
CNTNAP5	THAP9	0.320499	0.056684	-0.54772	0.12687	-2.07322	0.038151	0/0
HCN2	THAP9	0.202163	0.237036	-0.63027	0.06883	-2.0722	0.038247	0/0
BEND6	THAP9	0.150518	0.380897	-0.66109	0.052523	-2.07125	0.038335	0/0
OSBPL5	THAP9	0.454329	0.005377	-0.42678	0.251957	-2.07054	0.038402	#ERROR!
ASIC1	THAP9	0.300779	0.074665	-0.56183	0.115413	-2.07006	0.038447	0/0
HHIPL1	THAP9	0.255826	0.132074	-0.59415	0.091583	-2.06964	0.038486	0/0
KCNMB1	THAP9	0.395416	0.016988	-0.48333	0.18747	-2.06929	0.038519	#ERROR!
COLEC12	THAP9	0.393046	0.017722	-0.48536	0.185354	-2.06894	0.038551	#ERROR!
GTF2B	THAP9	0.066757	0.698877	0.766667	0.015944	2.06887	0.038558	0/+
OTOF	THAP9	0.223083	0.190937	-0.61559	0.077596	-2.06762	0.038675	0/0
GDAP2	THAP9	0.248857	0.143307	0.833333	0.005266	2.0676	0.038678	0/+
GAS8-AS1	THAP9	0.580802	0.000204	-0.27386	0.475797	-2.06749	0.038688	#ERROR!
REG1A	THAP9	0.170369	0.320503	-0.64814	0.059039	-2.06623	0.038807	0/0
CTBP2P7	THAP9	0.467943	0.004002	-0.41079	0.272071	-2.06594	0.038834	#ERROR!
FAR1	THAP9	0.411716	0.0126	-0.46667	0.205386	-2.0648	0.038942	#ERROR!
DCDC1	THAP9	0.261138	0.123959	0.836827	0.004907	2.06412	0.039007	0/+
MIR2117HG	THAP9	-0.19491	0.25464	0.632456	0.067583	2.06361	0.039054	0/0
RFPL2	THAP9	0.287925	0.088595	0.845196	0.004117	2.06329	0.039085	0/+
CA3	THAP9	0.617812	5.95e-05	-0.21758	0.573875	-2.06281	0.03913	#ERROR!
DENND1A	THAP9	0.251062	0.13968	0.833333	0.005266	2.06245	0.039165	0/+
MED4	THAP9	0.155005	0.366696	0.8	0.009628	2.06233	0.039176	0/+
RN7SL208P	THAP9	0.117697	0.4942	-0.6773	0.045043	-2.06233	0.039176	0/-
KIF26A	THAP9	0.074556	0.665633	-0.7	0.03577	-2.06156	0.03925	0/-
LYL1	THAP9	0.116147	0.499944	-0.67783	0.044809	-2.06105	0.039298	0/-
DPP4	THAP9	0.031284	0.85627	0.75	0.019942	2.06083	0.039319	0/+
LRRC69	THAP9	0.440278	0.007204	-0.43719	0.23931	-2.06009	0.03939	#ERROR!
GPR156	THAP9	0.500357	0.001885	-0.37268	0.323259	-2.06007	0.039392	#ERROR!
INS-IGF2	THAP9	-0.16411	0.338856	0.65	0.058073	2.05918	0.039477	0/0
PTCSC2	THAP9	-0.31438	0.061854	0.547723	0.12687	2.05832	0.039559	0/0
FRRS1	THAP9	0.252865	0.136765	0.833333	0.005266	2.05824	0.039567	0/+
LOC101927793	THAP9	-0.21713	0.203367	0.616667	0.076929	2.05773	0.039616	0/0
ATP5MG	THAP9	-0.13453	0.434045	0.666667	0.049867	2.05736	0.039652	0/+
CDC42EP5	THAP9	0.262504	0.121934	-0.58578	0.097434	-2.05722	0.039665	0/0
CPNE2	THAP9	0.241648	0.155648	-0.6	0.087623	-2.05647	0.039737	0/0
AKR1C4	THAP9	-0.1903	0.266255	0.633333	0.067086	2.05635	0.039749	0/0
LSM8	THAP9	-0.0721	0.676057	0.7	0.03577	2.05615	0.039768	0/+
PACS1	THAP9	0.442485	0.006886	-0.43333	0.243952	-2.05568	0.039813	#ERROR!
MSRB3	THAP9	0.474284	0.003474	-0.4	0.286105	-2.05551	0.039829	#ERROR!
COL4A6	THAP9	0.461117	0.004648	-0.41404	0.26792	-2.05546	0.039835	#ERROR!
DHRS4L2	THAP9	-0.03817	0.825059	0.716667	0.029818	2.0549	0.039889	0/+
CDR2L	THAP9	0.240875	0.157015	-0.6	0.087623	-2.05468	0.03991	0/0
CIDEC	THAP9	-0.45814	0.004956	0.416667	0.264586	2.05415	0.039961	-/0
LRRC41	THAP9	0.25478	0.133718	0.833333	0.005266	2.05376	0.039999	0/+
MCEE	THAP9	0.307474	0.06812	0.85	0.003705	2.05369	0.040006	0/+
CSMD2	THAP9	0.171109	0.318375	-0.64416	0.061138	-2.05295	0.040077	0/0
CES2	THAP9	0.074155	0.667326	0.766667	0.015944	2.0526	0.040112	0/+
EIF2S3	THAP9	0.30795	0.067673	0.85	0.003705	2.05254	0.040117	0/+
ACSM2A	THAP9	-0.13232	0.441704	0.666667	0.049867	2.05243	0.040128	0/+
MAP3K3	THAP9	0.406952	0.01377	-0.46667	0.205386	-2.05228	0.040143	#ERROR!
PIP4K2A	THAP9	0.457448	0.00503	-0.41667	0.264586	-2.05223	0.040147	#ERROR!
JKAMP	THAP9	0.425105	0.009752	0.883333	0.001591	2.05026	0.040339	#ERROR!
PDGFA	THAP9	0.423431	0.010075	-0.45	0.224216	-2.04968	0.040396	#ERROR!
PIP4P2	THAP9	0.580496	0.000206	-0.26667	0.487922	-2.04949	0.040414	#ERROR!
GAPDHP51	THAP9	-0.01919	0.911566	0.724569	0.027239	2.04928	0.040434	0/+
CCPG1	THAP9	-0.000386	0.998216	0.733333	0.024554	2.04907	0.040455	0/+
DDX54	THAP9	-0.0354	0.837579	0.716667	0.029818	2.04883	0.040479	0/+
CPPED1	THAP9	-0.03528	0.838162	0.716667	0.029818	2.04854	0.040507	0/+
CCDC25	THAP9	0.25713	0.130047	0.833333	0.005266	2.04825	0.040535	0/+
LOC105371050	THAP9	0.411227	0.012716	-0.46106	0.211616	-2.04789	0.040571	#ERROR!
C11orf94	THAP9	0.289629	0.086641	-0.5632	0.114336	-2.04771	0.040588	0/0
PLCB4	THAP9	0.437456	0.00763	-0.43515	0.241757	-2.04694	0.040664	#ERROR!
EVC2	THAP9	0.520888	0.001125	-0.3431	0.366029	-2.0466	0.040697	#ERROR!
AXL	THAP9	0.404635	0.014372	-0.46667	0.205386	-2.04621	0.040736	#ERROR!
AP4M1	THAP9	0.321983	0.055484	-0.53783	0.135289	-2.04617	0.04074	0/0
LOC100130950	THAP9	0.335115	0.045726	-0.5272	0.144699	-2.0459	0.040766	#ERROR!
ASPHD2	THAP9	0.211922	0.214676	-0.61667	0.076929	-2.0458	0.040777	0/0
FARSA	THAP9	0.208819	0.221623	0.816667	0.007225	2.04579	0.040777	0/+
FBXO7	THAP9	0.20909	0.22101	0.816667	0.007225	2.04517	0.040838	0/+
NECAB2	THAP9	-0.386	0.020062	0.483333	0.18747	2.04497	0.040858	-/0
BMP7	THAP9	0.345951	0.038757	-0.51793	0.153206	-2.04482	0.040872	#ERROR!
NOL7	THAP9	0.078151	0.650511	0.766667	0.015944	2.0438	0.040973	0/+
PRICKLE2-DT	THAP9	0.308249	0.067393	-0.54772	0.12687	-2.04347	0.041006	0/0
CH25H	THAP9	0.152173	0.375624	-0.65273	0.056677	-2.04274	0.041078	0/0
KLHDC7B-DT	THAP9	0.074936	0.664029	-0.69502	0.037688	-2.04115	0.041236	0/-
LPCAT4	THAP9	0.183328	0.284506	-0.63333	0.067086	-2.04053	0.041297	0/0
RAB3D	THAP9	0.483682	0.002802	-0.38333	0.308495	-2.03912	0.041438	#ERROR!
KIAA0040	THAP9	0.41944	0.010882	-0.45	0.224216	-2.03906	0.041444	#ERROR!
LRRC14B	THAP9	0.45813	0.004957	-0.41079	0.272071	-2.0386	0.04149	#ERROR!
CD3E	THAP9	0.041584	0.80971	-0.7113	0.031657	-2.03843	0.041507	0/-
ITGA2	THAP9	0.344899	0.039394	-0.51667	0.15439	-2.03842	0.041507	#ERROR!
PPP5C	THAP9	0.429611	0.008926	0.883333	0.001591	2.0382	0.04153	#ERROR!
ABCB11	THAP9	0.005288	0.975584	0.733333	0.024554	2.03665	0.041685	0/+
GSTA12P	THAP9	-0.39659	0.016634	0.470605	0.20107	2.03628	0.041722	-/0
EPPK1	THAP9	0.651819	1.66e-05	-0.15063	0.698884	-2.03583	0.041767	#ERROR!
ARAP3	THAP9	0.449694	0.00593	-0.41841	0.262381	-2.03549	0.041801	#ERROR!
NLRP7	THAP9	0.214069	0.209959	0.816922	0.007192	2.03544	0.041806	0/+
PHB	THAP9	-0.06257	0.716966	0.7	0.03577	2.0352	0.041831	0/+
NT5DC2	THAP9	0.34065	0.04205	-0.51883	0.152367	-2.03437	0.041915	#ERROR!
PKN1	THAP9	-0.04339	0.801623	-0.75	0.019942	-2.03431	0.041921	0/-
GSTA1	THAP9	-0.18057	0.291937	0.633333	0.067086	2.03429	0.041922	0/0
DACT3	THAP9	0.381768	0.021587	-0.48333	0.18747	-2.03411	0.041941	#ERROR!
KLB	THAP9	0.00657	0.969666	0.733333	0.024554	2.03384	0.041967	0/+
CYP39A1	THAP9	0.043716	0.800144	0.75	0.019942	2.03358	0.041994	0/+
ILVBL	THAP9	-0.12243	0.476863	0.666667	0.049867	2.03043	0.042313	0/+
RN7SL23P	THAP9	0.319574	0.057441	-0.53452	0.13818	-2.03012	0.042344	0/0
POLR2E	THAP9	-0.09166	0.594937	0.683333	0.042442	2.02932	0.042426	0/+
KMO	THAP9	-0.22987	0.177434	0.6	0.087623	2.02918	0.04244	0/0
RN7SL180P	THAP9	0.197373	0.248566	-0.62106	0.074253	-2.02814	0.042546	0/0
ARHGAP28	THAP9	0.27614	0.103051	-0.56667	0.111633	-2.02677	0.042686	0/0
FAM3B	THAP9	0.27604	0.103181	-0.56667	0.111633	-2.02653	0.04271	0/0
DSTYK	THAP9	0.659157	1.23e-05	-0.13333	0.732368	-2.02536	0.042831	#ERROR!
C16orf89	THAP9	0.316	0.060447	-0.53557	0.137262	-2.02463	0.042906	0/0
PFKFB4	THAP9	0.443801	0.006702	-0.42018	0.260159	-2.02408	0.042962	#ERROR!
ABCD3	THAP9	0.128364	0.45561	0.783333	0.01252	2.02407	0.042963	0/+
LOC101929626	THAP9	-0.33286	0.047292	0.521749	0.149669	2.0239	0.042981	-/0
LINC01354	THAP9	0.078272	0.650006	0.762821	0.016814	2.02326	0.043046	0/+
PLAGL1	THAP9	0.293807	0.081991	-0.55231	0.123077	-2.0231	0.043063	0/0
NCS1	THAP9	0.056904	0.741672	-0.7	0.03577	-2.02276	0.043098	0/-
ABCD2	THAP9	0.223247	0.190601	-0.60252	0.085953	-2.02252	0.043122	0/0
PPP1R16B	THAP9	0.281805	0.095893	-0.56067	0.116327	-2.02099	0.043281	0/0
LRCH2	THAP9	0.40814	0.01347	-0.4538	0.219846	-2.01966	0.043419	#ERROR!
CD93	THAP9	0.54625	0.000568	-0.3	0.432845	-2.01898	0.043489	#ERROR!
PRAMEF10	THAP9	-0.24611	0.147921	0.585779	0.097434	2.01886	0.043502	0/0
PTN	THAP9	0.294985	0.080716	-0.55	0.124977	-2.01867	0.043521	0/0
ERGIC2	THAP9	0.118313	0.491927	0.778249	0.013506	2.0179	0.043602	0/+
ARHGAP33	THAP9	0.460766	0.004683	-0.4	0.286105	-2.01765	0.043627	#ERROR!
GRM4	THAP9	0.017741	0.918204	-0.71819	0.029308	-2.01703	0.043693	0/-
HDAC2-AS2	THAP9	-0.04974	0.773286	-0.74911	0.020174	-2.01591	0.04381	0/-
ARHGAP39	THAP9	0.569976	0.000285	-0.26667	0.487922	-2.01508	0.043896	#ERROR!
MIR98	THAP9	0.296432	0.07917	-0.54772	0.12687	-2.01501	0.043904	0/0
FGF21	THAP9	-0.08512	0.621599	0.683333	0.042442	2.01488	0.043917	0/+
RN7SL604P	THAP9	0.296147	0.079473	-0.54772	0.12687	-2.01433	0.043975	0/0
RALGDS	THAP9	0.427036	0.00939	-0.43333	0.243952	-2.01399	0.044011	#ERROR!
CRB2	THAP9	0.207407	0.224832	-0.61026	0.08094	-2.01297	0.044118	0/0
DCHS1	THAP9	0.409296	0.013184	-0.45	0.224216	-2.01225	0.044193	#ERROR!
PHYHIP	THAP9	0.409272	0.013189	-0.45	0.224216	-2.01219	0.0442	#ERROR!
MATN3	THAP9	0.232166	0.173029	-0.59331	0.092162	-2.01174	0.044248	0/0
CCT6P3	THAP9	0.479882	0.003059	-0.37657	0.317823	-2.01099	0.044326	#ERROR!
PMP22	THAP9	0.269456	0.112008	-0.56667	0.111633	-2.01096	0.044329	0/0
RBP5	THAP9	-0.0515	0.765495	0.7	0.03577	2.01089	0.044337	0/+
CHRNA3	THAP9	0.30741	0.068181	-0.53785	0.135273	-2.01082	0.044344	0/0
NUTM2D	THAP9	0.388667	0.019147	-0.46862	0.203236	-2.01021	0.044408	#ERROR!
PANK1	THAP9	0.380818	0.021942	0.866667	0.002495	2.01017	0.044413	#ERROR!
PKLR	THAP9	-0.24573	0.148561	0.583333	0.099186	2.00985	0.044447	0/0
FIGNL2-DT	THAP9	0.364772	0.028715	-0.48949	0.181082	-2.00854	0.044586	#ERROR!
FCHO1	THAP9	0.169038	0.324355	-0.63333	0.067086	-2.00826	0.044616	0/0
KCNJ8	THAP9	-0.01687	0.922224	0.716667	0.029818	2.00823	0.044619	0/+
PLA2G5	THAP9	0.112134	0.514971	-0.66667	0.049867	-2.00757	0.044689	0/-
LSM5	THAP9	-0.06038	0.726479	0.694567	0.037864	2.00725	0.044723	0/+
MOB3A	THAP9	0.244609	0.150489	-0.58333	0.099186	-2.00723	0.044725	0/0
PTGIS	THAP9	0.331896	0.047979	-0.51667	0.15439	-2.00629	0.044826	#ERROR!
NLRC5	THAP9	0.015964	0.926373	-0.71667	0.029818	-2.00625	0.044829	0/-
ARRDC5	THAP9	-0.07089	0.681187	-0.75633	0.018354	-2.00592	0.044864	0/-
GPR83	THAP9	0.331635	0.048166	-0.51667	0.15439	-2.00565	0.044894	#ERROR!
LINC02361	THAP9	0.194309	0.256136	-0.61667	0.076929	-2.00559	0.0449	0/0
LHFPL1	THAP9	0.137321	0.424496	-0.6514	0.057351	-2.00451	0.045015	0/0
METTL21EP	THAP9	-0.42547	0.009682	0.431291	0.246433	2.00431	0.045037	-/0
MTCYBP19	THAP9	-0.29193	0.084054	0.547723	0.12687	2.00423	0.045046	0/0
FGF11	THAP9	0.129936	0.450061	-0.65547	0.055293	-2.00358	0.045116	0/0
LSM12	THAP9	0.137771	0.422966	0.783333	0.01252	2.00311	0.045166	0/+
CCDC188	THAP9	0.403686	0.014624	-0.45189	0.222039	-2.00273	0.045206	#ERROR!
KRT18P6	THAP9	0.444991	0.00654	-0.41079	0.272071	-2.00248	0.045233	#ERROR!
PRIMA1	THAP9	0.143681	0.403148	-0.64708	0.059592	-2.00236	0.045246	0/0
KTN1	THAP9	0.276794	0.102203	0.833333	0.005266	2.00191	0.045294	0/+
ARHGEF10	THAP9	0.540725	0.000662	-0.3	0.432845	-2.00182	0.045304	#ERROR!
MARVELD1	THAP9	0.287866	0.088663	-0.55	0.124977	-2.00165	0.045323	0/0
HEPH	THAP9	0.470422	0.003788	-0.38333	0.308495	-2.00155	0.045333	#ERROR!
FN1	THAP9	0.182427	0.286921	0.8	0.009628	2.00056	0.04544	0/+
H2AW	THAP9	0.443157	0.006792	-0.41178	0.270805	-2.00008	0.045491	#ERROR!
LINC01251	THAP9	0.213315	0.211606	-0.60249	0.085967	-1.99963	0.04554	0/0
FBXL16	THAP9	0.381872	0.021548	-0.4706	0.20107	-1.99832	0.045682	#ERROR!
RNU5D-1	THAP9	-0.28845	0.087988	-0.83666	0.004924	-1.99823	0.045691	0/-
GSTO2	THAP9	0.099137	0.565121	0.766667	0.015944	1.99751	0.04577	0/+
ADH1B	THAP9	-0.04532	0.792981	0.7	0.03577	1.99734	0.045789	0/+
MIR933	THAP9	0.28888	0.087496	-0.54772	0.12687	-1.99694	0.045832	0/0
HSPG2	THAP9	0.551915	0.000484	-0.28333	0.46003	-1.99686	0.04584	#ERROR!
HOXB-AS1	THAP9	0.131589	0.444268	-0.65273	0.056677	-1.99677	0.04585	0/0
LINC01331	THAP9	0.244439	0.150782	0.821584	0.006603	1.99631	0.0459	0/+
ORMDL3	THAP9	0.140972	0.412166	0.783333	0.01252	1.99596	0.045938	0/+
RAVER2	THAP9	0.364339	0.028919	-0.48536	0.185354	-1.99559	0.045978	#ERROR!
C1QBP	THAP9	0.100032	0.561597	0.766667	0.015944	1.99553	0.045985	0/+
CCN4	THAP9	0.443028	0.00681	-0.41005	0.27303	-1.99517	0.046025	#ERROR!
AKR7A3	THAP9	-0.3273	0.051348	0.516667	0.15439	1.99501	0.046042	0/0
LOC100996696	THAP9	-0.05808	0.736501	0.69282	0.038554	1.99484	0.04606	0/+
MADCAM1	THAP9	0.105595	0.539923	-0.66667	0.049867	-1.99309	0.046251	0/-
AOC4P	THAP9	-0.00974	0.955051	0.716667	0.029818	1.99262	0.046303	0/+
HBG2	THAP9	0.009232	0.957384	0.725729	0.026873	1.99244	0.046323	0/+
IRS4	THAP9	0.286911	0.089774	-0.54772	0.12687	-1.99224	0.046345	0/0
RN7SL487P	THAP9	0.116983	0.496842	0.773001	0.014577	1.99202	0.046369	0/+
PIWIL4	THAP9	0.481751	0.00293	-0.36667	0.33174	-1.99116	0.046463	#ERROR!
GLI4	THAP9	0.383362	0.021001	-0.46667	0.205386	-1.99109	0.046471	#ERROR!
KRT17P3	THAP9	-0.02762	0.87294	0.707475	0.033013	1.99097	0.046484	0/+
EDN3	THAP9	-0.06931	0.68795	-0.75233	0.019348	-1.98908	0.046693	0/-
GSTM4	THAP9	-0.10364	0.547507	0.666667	0.049867	1.98876	0.046728	0/+
ADH5P5	THAP9	-0.43655	0.00777	0.414039	0.26792	1.98813	0.046798	-/0
C19orf33	THAP9	0.050534	0.769757	-0.69502	0.037688	-1.98753	0.046863	0/-
CACNA2D4	THAP9	0.522789	0.001071	-0.31667	0.406397	-1.9874	0.046878	#ERROR!
BBS12	THAP9	0.601558	0.000104	-0.20921	0.589047	-1.987	0.046922	#ERROR!
GTF2A2	THAP9	0.234438	0.168742	0.816667	0.007225	1.98682	0.046942	0/+
ATN1	THAP9	0.607531	8.51e-05	-0.2	0.605901	-1.98657	0.04697	#ERROR!
GCOM1	THAP9	0.595792	0.000126	-0.21758	0.573875	-1.98652	0.046976	#ERROR!
PDLIM3	THAP9	0.433344	0.008287	-0.41667	0.264586	-1.98641	0.046987	#ERROR!
LIPH	THAP9	0.508658	0.001536	-0.33333	0.380713	-1.98605	0.047028	#ERROR!
LRP1-AS	THAP9	0.135651	0.430205	-0.64742	0.059417	-1.98569	0.047067	0/0
AFAP1	THAP9	0.596073	0.000125	-0.21667	0.575515	-1.98539	0.047101	#ERROR!
MIR325HG	THAP9	-0.29395	0.081841	-0.83666	0.004924	-1.9851	0.047134	0/-
RHO	THAP9	0.024847	0.885626	-0.70747	0.033013	-1.98489	0.047157	0/-
CCL26	THAP9	0.306512	0.069032	-0.53009	0.142107	-1.98489	0.047157	0/0
P2RX3	THAP9	0.189372	0.268648	0.8	0.009628	1.98481	0.047165	0/+
PDE4C	THAP9	0.415953	0.011631	-0.43333	0.243952	-1.9845	0.047201	#ERROR!
PSMA1	THAP9	0.066173	0.701388	0.75	0.019942	1.98428	0.047224	0/+
OPCML	THAP9	0.371663	0.025621	-0.47464	0.196696	-1.98366	0.047294	#ERROR!
IQANK1	THAP9	0.632636	3.48e-05	-0.159	0.68284	-1.98313	0.047353	#ERROR!
NDUFAF5	THAP9	0.066946	0.698065	0.75	0.019942	1.98259	0.047414	0/+
C16orf87	THAP9	0.336917	0.044502	0.85	0.003705	1.98178	0.047503	#ERROR!
ACHE	THAP9	0.183457	0.284162	-0.61667	0.076929	-1.98096	0.047596	0/0
PIK3AP1	THAP9	0.147924	0.389253	0.783333	0.01252	1.98043	0.047656	0/+
MB21D2	THAP9	0.545455	0.000581	-0.28452	0.458069	-1.97946	0.047764	#ERROR!
EIF3EP1	THAP9	0.575523	0.00024	-0.24371	0.527446	-1.9794	0.047771	#ERROR!
LINC00892	THAP9	0.051969	0.763406	-0.69204	0.038865	-1.97813	0.047914	0/-
GMPPA	THAP9	-0.12694	0.460668	0.65	0.058073	1.97606	0.048148	0/0
DCAF13P1	THAP9	0.280051	0.098067	-0.54772	0.12687	-1.97591	0.048165	0/0
COL14A1	THAP9	0.412643	0.012382	-0.43333	0.243952	-1.97575	0.048183	#ERROR!
HORMAD2-AS1	THAP9	-0.37732	0.023292	0.466667	0.205386	1.97563	0.048196	-/0
ALOX15	THAP9	0.449971	0.005895	-0.39528	0.292352	-1.97559	0.048201	#ERROR!
CENPN	THAP9	0.273997	0.105861	0.828459	0.005795	1.97408	0.048372	0/+
LOC400622	THAP9	0.209397	0.220316	-0.59761	0.089224	-1.97396	0.048386	0/0
APPL2	THAP9	-0.000772	0.996433	0.716667	0.029818	1.973	0.048495	0/+
COPS3	THAP9	0.195056	0.254276	0.8	0.009628	1.9719	0.048622	0/+
EIF2S2	THAP9	0.195069	0.254245	0.8	0.009628	1.97187	0.048625	0/+
POPDC2	THAP9	0.345158	0.039236	-0.49373	0.17676	-1.97166	0.048649	#ERROR!
GTF2IP9	THAP9	0.381132	0.021824	-0.46169	0.210913	-1.97149	0.048667	#ERROR!
HELB	THAP9	0.65478	1.47e-05	-0.11667	0.765008	-1.97145	0.048673	#ERROR!
LOC101929473	THAP9	0.550816	0.000499	-0.27386	0.475797	-1.97094	0.048731	#ERROR!
C11orf65	THAP9	0.285843	0.091028	0.831962	0.005411	1.97062	0.048767	0/+
ITIH2	THAP9	0.035533	0.836997	0.733333	0.024554	1.97043	0.048789	0/+
FNDC8	THAP9	0.277698	0.101043	-0.54772	0.12687	-1.97033	0.048801	0/0
COQ7	THAP9	0.396318	0.016716	0.866667	0.002495	1.97021	0.048814	#ERROR!
EIF3IP1	THAP9	-0.27632	0.10281	0.547723	0.12687	1.96707	0.049175	0/0
JAM3	THAP9	0.458062	0.004965	-0.38333	0.308495	-1.96707	0.049176	#ERROR!
ELAVL2	THAP9	0.170102	0.321274	-0.62106	0.074253	-1.96637	0.049256	0/0
AKR1C3	THAP9	-0.03116	0.856855	0.7	0.03577	1.9663	0.049264	0/+
KIRREL2	THAP9	0.181144	0.290382	-0.61389	0.07865	-1.96595	0.049304	0/0
HOXA3	THAP9	0.198326	0.246244	-0.60252	0.085953	-1.96544	0.049363	0/0
PTPN5	THAP9	0.019158	0.911696	0.724569	0.027239	1.96536	0.049373	0/+
LOC100507336	THAP9	0.313559	0.06257	-0.51793	0.153206	-1.96527	0.049383	0/0
LINC02701	THAP9	0.184875	0.280391	0.794986	0.010445	1.96486	0.04943	0/+
MTHFR	THAP9	0.622723	5e-05	-0.16667	0.668231	-1.96457	0.049464	#ERROR!
BCL2L2	THAP9	0.68954	3.3e-06	-0.05	0.898353	-1.96335	0.049606	#ERROR!
MTCO1P42	THAP9	-0.07268	0.67359	0.677296	0.045043	1.96288	0.04966	0/+
CSDC2	THAP9	0.271234	0.109569	-0.55	0.124977	-1.96216	0.049744	0/0
LRRC23	THAP9	-0.00657	0.969682	0.711303	0.031657	1.96174	0.049793	0/+
POU4F1	THAP9	0.020877	0.903808	0.724569	0.027239	1.96159	0.04981	0/+
ESAM	THAP9	0.389701	0.018803	-0.45	0.224216	-1.96122	0.049853	#ERROR!
C10orf71	THAP9	-0.0059	0.972777	0.711512	0.031584	1.9612	0.049856	0/+
ID3	THAP9	0.148053	0.388836	-0.63333	0.067086	-1.96114	0.049862	0/0
HOPX	THAP9	0.292372	0.083566	-0.53333	0.139227	-1.96079	0.049903	0/0
PRH1-PRR4	THAP9	0.127691	0.457995	-0.6455	0.060427	-1.96075	0.049908	0/0
HACD4	THAP9	0.26701	0.115429	-0.55231	0.123077	-1.95944	0.050061	0/0
MIR210	THAP9	0.31932	0.057652	-0.51121	0.159556	-1.95926	0.050082	0/0
LCNL1	THAP9	0.032148	0.852345	-0.6975	0.036722	-1.95779	0.050254	0/-
RARG	THAP9	0.551529	0.000489	-0.26667	0.487922	-1.95619	0.050443	#ERROR!
NMNAT2	THAP9	0.418281	0.011126	-0.42018	0.260159	-1.95547	0.050527	#ERROR!
HES2	THAP9	0.469679	0.003851	-0.36604	0.33263	-1.95543	0.050532	#ERROR!
HGD	THAP9	-0.31052	0.065291	0.516667	0.15439	1.95413	0.050686	0/0
CARMIL2	THAP9	0.289338	0.086973	-0.53333	0.139227	-1.95354	0.050756	0/0
CAPN7	THAP9	0.460627	0.004697	0.883333	0.001591	1.95353	0.050757	#ERROR!
PEX5L	THAP9	0.332775	0.047355	-0.49793	0.172532	-1.95323	0.050792	#ERROR!
CPA3	THAP9	0.368431	0.027036	-0.46667	0.205386	-1.95304	0.050815	#ERROR!
KEL	THAP9	0.254686	0.133866	-0.5594	0.117338	-1.95298	0.050822	0/0
LIPC	THAP9	-0.02498	0.885035	0.7	0.03577	1.95276	0.050848	0/+
JAG2	THAP9	0.452784	0.005556	-0.38333	0.308495	-1.95249	0.05088	#ERROR!
GPR78	THAP9	0.199902	0.242433	-0.59761	0.089224	-1.95227	0.050906	0/0
OVAAL	THAP9	0.206087	0.227864	-0.59337	0.09212	-1.95199	0.05094	0/0
DARS1-AS1	THAP9	0.015129	0.930214	0.719672	0.028819	1.95178	0.050964	0/+
DR1	THAP9	0.119987	0.485778	0.766667	0.015944	1.95132	0.051019	0/+
RBP1	THAP9	0.452298	0.005613	-0.38333	0.308495	-1.95115	0.051039	#ERROR!
IQGAP1	THAP9	0.348761	0.037099	-0.48333	0.18747	-1.95074	0.051088	#ERROR!
RASA3	THAP9	0.143299	0.404414	-0.63333	0.067086	-1.95051	0.051115	0/0
COL8A2	THAP9	0.30898	0.066712	-0.51667	0.15439	-1.95039	0.051129	0/0
RN7SL96P	THAP9	-0.16277	0.34289	0.621059	0.074253	1.94985	0.051193	0/0
PLPP4	THAP9	0.284546	0.09257	-0.53557	0.137262	-1.94896	0.0513	0/0
FCF1	THAP9	0.404506	0.014406	0.866667	0.002495	1.94887	0.051311	#ERROR!
RN7SL332P	THAP9	-0.26856	0.113248	0.547723	0.12687	1.94872	0.051329	0/0
CTAG1A	THAP9	0.268563	0.113248	-0.54772	0.12687	-1.94872	0.051329	0/0
FSTL3	THAP9	0.169166	0.323981	-0.61667	0.076929	-1.94868	0.051334	0/0
APOOL	THAP9	0.404635	0.014372	0.866667	0.002495	1.94853	0.051351	#ERROR!
PLXDC1	THAP9	0.435275	0.007973	-0.4	0.286105	-1.94785	0.051433	#ERROR!
LARP4	THAP9	0.29971	0.075753	0.833333	0.005266	1.94721	0.051509	0/+
PCDHGC3	THAP9	0.418668	0.011044	-0.41667	0.264586	-1.94717	0.051514	#ERROR!
GTF2H1	THAP9	0.251593	0.138816	0.816667	0.007225	1.94692	0.051544	0/+
MIIP	THAP9	0.113815	0.50865	-0.65	0.058073	-1.94691	0.051545	0/0
CLYBL	THAP9	-0.0542	0.753555	0.683333	0.042442	1.94688	0.051549	0/+
ARHGAP23	THAP9	0.307068	0.068503	-0.51667	0.15439	-1.94577	0.051682	0/0
HSPB6	THAP9	0.0215	0.900951	-0.7	0.03577	-1.94515	0.051757	0/-
LINC02043	THAP9	-0.16013	0.350867	0.621059	0.074253	1.94393	0.051904	0/0
CD3D	THAP9	0.135702	0.43003	-0.63599	0.065595	-1.94329	0.051981	0/0
NDP	THAP9	0.252678	0.137065	-0.55777	0.118641	-1.9431	0.052004	0/0
GJB2	THAP9	-0.08291	0.630686	0.666667	0.049867	1.94301	0.052015	0/+
OCEL1	THAP9	-0.16621	0.332646	0.616667	0.076929	1.94201	0.052136	0/0
PRKCH	THAP9	0.39897	0.015936	-0.43333	0.243952	-1.93993	0.052389	#ERROR!
PARP4P1	THAP9	0.196744	0.250108	-0.59588	0.0904	-1.93918	0.052479	0/0
GAS7	THAP9	0.447892	0.006157	-0.38333	0.308495	-1.93906	0.052494	#ERROR!
G3BP1	THAP9	0.466044	0.004174	0.883333	0.001591	1.93843	0.052571	#ERROR!
ACSS3	THAP9	0.050209	0.771199	0.733333	0.024554	1.93825	0.052593	0/+
H2BU1	THAP9	0.423431	0.010075	-0.40837	0.275189	-1.93796	0.052628	#ERROR!
CCDC114	THAP9	0.353328	0.034527	-0.47464	0.196696	-1.93746	0.052689	#ERROR!
P2RX6	THAP9	0.308496	0.067162	-0.51262	0.158207	-1.93718	0.052723	0/0
CAVIN1	THAP9	0.303444	0.072003	-0.51667	0.15439	-1.93702	0.052742	0/0
OR9I1	THAP9	0.420658	0.01063	-0.41079	0.272071	-1.93695	0.052752	#ERROR!
IGKV1-17	THAP9	0.282226	0.095377	-0.53333	0.139227	-1.93659	0.052796	0/0
KCNN3	THAP9	0.378034	0.023011	-0.45189	0.222039	-1.93646	0.052811	#ERROR!
LMO3	THAP9	0.320734	0.056492	-0.50224	0.168255	-1.93631	0.05283	0/0
FXYD3	THAP9	0.471838	0.00367	-0.35598	0.34708	-1.93619	0.052844	#ERROR!
RBMS3	THAP9	0.437335	0.007648	-0.39331	0.29499	-1.93604	0.052863	#ERROR!
DBIL5P	THAP9	0.350341	0.036192	-0.4767	0.194487	-1.93582	0.052889	#ERROR!
GLT8D2	THAP9	0.537531	0.000723	-0.27615	0.471962	-1.93505	0.052984	#ERROR!
COL6A2	THAP9	0.322884	0.054766	-0.5	0.170471	-1.93501	0.052989	0/0
ACBD5	THAP9	0.528742	0.000916	0.9	0.000943	1.93425	0.053082	#ERROR!
BCL11A	THAP9	0.356531	0.032811	-0.4706	0.20107	-1.9341	0.053101	#ERROR!
COSMOC	THAP9	0.159722	0.352111	0.779773	0.013205	1.93396	0.053118	0/+
LHFPL6	THAP9	0.379015	0.022629	-0.45	0.224216	-1.93378	0.05314	#ERROR!
MIR497HG	THAP9	0.41356	0.01217	-0.41667	0.264586	-1.93365	0.053156	#ERROR!
MLIP-IT1	THAP9	-0.15459	0.367988	0.621417	0.074037	1.93278	0.053263	0/0
EPOR	THAP9	0.360371	0.030846	-0.46667	0.205386	-1.9327	0.053274	#ERROR!
MOXD1	THAP9	0.161839	0.345682	-0.61667	0.076929	-1.93219	0.053336	0/0
LOC389199	THAP9	0.261203	0.123862	-0.54772	0.12687	-1.9314	0.053433	0/0
CCDC146	THAP9	0.27992	0.098231	-0.53333	0.139227	-1.93111	0.05347	0/0
RNA5SP151	THAP9	0.26097	0.12421	-0.54772	0.12687	-1.93085	0.053501	0/0
NKIRAS1	THAP9	0.306509	0.069035	0.833333	0.005266	1.93083	0.053504	0/+
FBLN2	THAP9	0.377856	0.023081	-0.45	0.224216	-1.93082	0.053505	#ERROR!
MIR1276	THAP9	0.299604	0.075862	-0.51755	0.153564	-1.93042	0.053555	0/0
ARPC1A	THAP9	-0.10634	0.53705	0.65	0.058073	1.93035	0.053563	0/0
ADH6	THAP9	-0.04661	0.78722	0.683333	0.042442	1.93022	0.053579	0/+
NRM	THAP9	0.046476	0.787808	-0.68333	0.042442	-1.92993	0.053615	0/-
PTENP1-AS	THAP9	0.26054	0.124853	-0.54772	0.12687	-1.92985	0.053626	0/0
COL9A1	THAP9	0.249678	0.141949	-0.55574	0.120281	-1.92964	0.053652	0/0
RNF217	THAP9	0.130191	0.449164	0.766667	0.015944	1.92863	0.053776	0/+
ALDH3B2	THAP9	0.514337	0.001331	-0.30277	0.428406	-1.92845	0.0538	#ERROR!
ADAP1	THAP9	0.159897	0.351576	-0.61667	0.076929	-1.92783	0.053876	0/0
PTGES3P4	THAP9	0.359137	0.031467	-0.46585	0.206291	-1.9273	0.053942	#ERROR!
CAPN11	THAP9	0.169535	0.322912	-0.61026	0.08094	-1.92702	0.053977	0/0
CHIA	THAP9	0.180716	0.291542	-0.60293	0.085682	-1.92688	0.053994	0/0
LOC100421173	THAP9	0.488974	0.002476	-0.33197	0.382785	-1.92534	0.054187	#ERROR!
NUDT2	THAP9	0.215527	0.206796	0.8	0.009628	1.92512	0.054214	0/+
ITPRIPL1	THAP9	0.295621	0.080033	-0.51883	0.152367	-1.92469	0.054268	0/0
NRP2	THAP9	0.501577	0.00183	-0.31667	0.406397	-1.92446	0.054297	#ERROR!
LINC02473	THAP9	0.415759	0.011674	-0.41079	0.272071	-1.92395	0.054361	#ERROR!
IL27	THAP9	-0.27681	0.102183	0.533333	0.139227	1.92373	0.054388	0/0
PDZK1	THAP9	-0.15745	0.359088	0.616667	0.076929	1.92234	0.054563	0/0
MIR3202-1	THAP9	0.257318	0.129756	-0.54772	0.12687	-1.92229	0.05457	0/0
HDAC5	THAP9	0.599678	0.000111	-0.18333	0.63682	-1.92167	0.054647	#ERROR!
DNAH17	THAP9	0.285898	0.090963	-0.5255	0.14624	-1.92151	0.054668	0/0
AMBP	THAP9	-0.15706	0.360283	0.616667	0.076929	1.92147	0.054672	0/0
IFITM3	THAP9	0.156936	0.360682	-0.61667	0.076929	-1.92118	0.054709	0/0
IL36G	THAP9	0.366727	0.027807	-0.45644	0.216838	-1.92027	0.054823	#ERROR!
LRRC8C-DT	THAP9	0.222988	0.19113	-0.57186	0.107657	-1.9195	0.054921	0/0
MYOF	THAP9	0.335758	0.045286	-0.48333	0.18747	-1.9185	0.055047	#ERROR!
KRT18P7	THAP9	0.499729	0.001915	-0.31634	0.406903	-1.91827	0.055076	#ERROR!
IRAG1	THAP9	0.505182	0.001675	-0.30963	0.417478	-1.91794	0.055118	#ERROR!
HMGB1P19	THAP9	0.119293	0.488322	-0.63901	0.063924	-1.91792	0.055121	0/0
PPM1D	THAP9	0.473671	0.003522	0.883333	0.001591	1.91701	0.055236	#ERROR!
CHST5	THAP9	0.45666	0.005116	-0.36515	0.333899	-1.9169	0.05525	#ERROR!
JAML	THAP9	0.008111	0.962555	-0.7	0.03577	-1.91584	0.055385	0/-
CDADC1	THAP9	0.219661	0.198009	0.8	0.009628	1.91562	0.055413	0/+
AMPD2	THAP9	0.025491	0.882681	0.716667	0.029818	1.91551	0.055427	0/+
CHST3	THAP9	0.294065	0.081711	-0.51667	0.15439	-1.91449	0.055558	0/0
ANGPTL2	THAP9	0.469392	0.003876	-0.35	0.35582	-1.91436	0.055574	#ERROR!
CKAP2LP1	THAP9	0.292846	0.083044	-0.51755	0.153564	-1.9142	0.055594	0/0
OLFML2A	THAP9	0.438622	0.007451	-0.38333	0.308495	-1.91381	0.055644	#ERROR!
KLKB1	THAP9	-0.20367	0.233487	0.583333	0.099186	1.91288	0.055763	0/0
ALDOB	THAP9	-0.25014	0.141181	0.55	0.124977	1.91264	0.055794	0/0
ADAM20P1	THAP9	0.108157	0.530078	-0.64416	0.061138	-1.91239	0.055826	0/0
ANGPTL3	THAP9	-0.24973	0.141869	0.55	0.124977	1.91166	0.055919	0/0
LIN7A	THAP9	0.06244	0.717524	0.733333	0.024554	1.9114	0.055954	0/+
LINC02603	THAP9	0.593371	0.000137	-0.18813	0.627873	-1.91111	0.055991	#ERROR!
GRK5	THAP9	0.437492	0.007624	-0.38333	0.308495	-1.91075	0.056036	#ERROR!
HPSE2	THAP9	0.252368	0.137563	-0.54772	0.12687	-1.9107	0.056043	0/0
LRMDA	THAP9	0.06283	0.715832	0.733333	0.024554	1.91054	0.056064	0/+
LOC101928937	THAP9	-0.25229	0.137696	0.547723	0.12687	1.91051	0.056068	0/0
NFE2L3	THAP9	0.26804	0.113979	-0.53557	0.137262	-1.90985	0.056153	0/0
ABCA3	THAP9	0.421012	0.010558	-0.4	0.286105	-1.90962	0.056182	#ERROR!
PHF21B	THAP9	0.251886	0.138343	-0.54772	0.12687	-1.90957	0.056188	0/0
CLEC11A	THAP9	0.225941	0.185166	-0.56667	0.111633	-1.90949	0.056199	0/0
CCDC181	THAP9	0.339347	0.042893	-0.47699	0.194179	-1.90933	0.056219	#ERROR!
GLYAT	THAP9	-0.0963	0.576362	0.65	0.058073	1.90815	0.056372	0/0
BSN-DT	THAP9	0.39866	0.016025	-0.42164	0.258339	-1.9078	0.056417	#ERROR!
MIR3136	THAP9	0.057563	0.738782	0.730297	0.025464	1.9078	0.056417	0/+
RHBDF1	THAP9	0.465658	0.004209	-0.35147	0.353666	-1.90756	0.056448	#ERROR!
RACGAP1	THAP9	0.254908	0.133515	0.811723	0.007889	1.90707	0.056512	0/+
NRGN	THAP9	0.255504	0.132578	-0.54394	0.130055	-1.90624	0.056619	0/0
KLHL17	THAP9	0.461053	0.004654	-0.35598	0.34708	-1.90603	0.056647	#ERROR!
LOC100288803	THAP9	0.249848	0.141668	-0.54772	0.12687	-1.90481	0.056804	0/0
MIR3198-1	THAP9	0.24973	0.141862	-0.54772	0.12687	-1.90454	0.05684	0/0
C2CD4D	THAP9	0.46941	0.003874	-0.34602	0.361692	-1.9045	0.056845	#ERROR!
MIR378A	THAP9	0.266757	0.115787	-0.5348	0.137936	-1.90447	0.056849	0/0
LOXL2	THAP9	0.348632	0.037174	-0.46667	0.205386	-1.90331	0.057	#ERROR!
MRPL30	THAP9	0.225169	0.186713	0.8	0.009628	1.90294	0.057048	0/+
GSTM1	THAP9	-0.13102	0.446247	0.627621	0.070365	1.90238	0.057121	0/0
MANEA-DT	THAP9	0.203919	0.232902	0.791669	0.01101	1.90196	0.057176	0/+
CCDC179	THAP9	0.287455	0.08914	-0.51755	0.153564	-1.90132	0.05726	0/0
NLGN3	THAP9	0.093092	0.589186	-0.65	0.058073	-1.90107	0.057293	0/0
ADD2	THAP9	0.103155	0.549381	-0.64409	0.061177	-1.90105	0.057296	0/0
CD8B	THAP9	-0.07391	0.668354	-0.73641	0.023655	-1.9008	0.057328	0/-
CDH8	THAP9	0.440409	0.007185	-0.37626	0.318262	-1.90056	0.05736	#ERROR!
LHX9	THAP9	-0.11635	0.499203	0.635989	0.065595	1.90024	0.057401	0/0
HNRNPCP8	THAP9	0.140506	0.413729	-0.62106	0.074253	-1.89999	0.057434	0/0
CBLB	THAP9	0.635597	3.11e-05	-0.11667	0.765008	-1.89952	0.057497	#ERROR!
KHK	THAP9	-0.06295	0.715291	0.666667	0.049867	1.89909	0.057553	0/+
NPHP4	THAP9	0.732797	3.74e-07	0.066946	0.864127	-1.89895	0.05757	#ERROR!
JCAD	THAP9	0.581654	0.000199	-0.2	0.605901	-1.89895	0.057571	#ERROR!
FAF1	THAP9	0.143804	0.40274	0.766667	0.015944	1.89827	0.05766	0/+
EFNB3	THAP9	0.327453	0.051235	-0.48333	0.18747	-1.89808	0.057685	0/0
DCLK2	THAP9	0.307583	0.068017	-0.5	0.170471	-1.89783	0.057719	0/0
NUP210L	THAP9	0.232372	0.172636	-0.55819	0.118305	-1.89721	0.0578	0/0
NDUFAF8	THAP9	-0.36447	0.028858	0.45	0.224216	1.89684	0.057849	-/0
NECAP2	THAP9	0.22042	0.196426	-0.56667	0.111633	-1.89677	0.057858	0/0
CERKL	THAP9	0.293644	0.082169	-0.51046	0.160267	-1.89504	0.058087	0/0
LINC01018	THAP9	-0.14521	0.398121	0.616667	0.076929	1.89491	0.058104	0/0
PLCXD3	THAP9	-0.03515	0.838745	-0.71667	0.029818	-1.89436	0.058177	0/-
MTCO1P53	THAP9	-0.29067	0.085467	0.512623	0.158207	1.89432	0.058183	0/0
DLGAP5	THAP9	0.153985	0.369897	-0.61088	0.080542	-1.89426	0.058191	0/0
IQCH	THAP9	0.541879	0.000641	0.9	0.000943	1.89395	0.058232	#ERROR!
PA2G4	THAP9	0.035533	0.836997	0.716667	0.029818	1.89352	0.058289	0/+
BAAT	THAP9	-0.32559	0.052654	0.483333	0.18747	1.89351	0.05829	0/0
FGD5	THAP9	0.344428	0.039681	-0.46667	0.205386	-1.89286	0.058377	#ERROR!
RHBDL1	THAP9	0.13996	0.415563	-0.61925	0.075347	-1.89235	0.058445	0/0
CCND3	THAP9	0.344126	0.039866	-0.46667	0.205386	-1.89211	0.058477	#ERROR!
IL27RA	THAP9	0.218346	0.200777	-0.56667	0.111633	-1.892	0.058491	0/0
MTMR2	THAP9	0.530673	0.00087	-0.26667	0.487922	-1.89164	0.058539	#ERROR!
RBM46	THAP9	0.386319	0.01995	-0.42749	0.251084	-1.8915	0.058558	#ERROR!
PLEKHS1	THAP9	0.464881	0.004282	-0.3458	0.362022	-1.89127	0.058589	#ERROR!
A1CF	THAP9	0.230319	0.17657	0.8	0.009628	1.89106	0.058617	0/+
CLEC2D	THAP9	0.32445	0.053535	-0.48333	0.18747	-1.89073	0.05866	0/0
FOXL1	THAP9	0.319642	0.057386	-0.48741	0.183225	-1.89067	0.058669	0/0
ETS1	THAP9	0.343225	0.040423	-0.46667	0.205386	-1.88987	0.058775	#ERROR!
GRPEL2-AS1	THAP9	0.270572	0.110474	-0.52705	0.144839	-1.88983	0.05878	0/0
CRIP1	THAP9	0.248214	0.144379	-0.54394	0.130055	-1.8892	0.058865	0/0
ABCB5	THAP9	0.272958	0.107244	-0.5249	0.146784	-1.88898	0.058894	0/0
GLA	THAP9	-0.11548	0.502422	0.633333	0.067086	1.88859	0.058946	0/0
NALCN	THAP9	0.34271	0.040745	-0.46667	0.205386	-1.88859	0.058946	#ERROR!
HAO2	THAP9	-0.19269	0.260189	0.583333	0.099186	1.88787	0.059043	0/0
LINC01564	THAP9	-0.32062	0.056582	0.48536	0.185354	1.88718	0.059136	0/0
IGHV3-71	THAP9	0.222381	0.192374	-0.56218	0.115134	-1.88688	0.059176	0/0
NGF-AS1	THAP9	0.24198	0.155063	-0.54772	0.12687	-1.88649	0.059229	0/0
MDK	THAP9	0.28233	0.09525	-0.51667	0.15439	-1.88648	0.059231	0/0
KLF14	THAP9	-0.41037	0.012921	0.401663	0.283918	1.88581	0.05932	-/0
MIR4526	THAP9	0.241677	0.155597	-0.54772	0.12687	-1.88578	0.059324	0/0
LOC101928940	THAP9	0.372541	0.025248	-0.43825	0.238036	-1.88525	0.059396	#ERROR!
PSMA5	THAP9	-0.21538	0.207104	0.566667	0.111633	1.8852	0.059403	0/0
AK2	THAP9	-0.02588	0.880909	0.683333	0.042442	1.88479	0.059458	0/+
FAP	THAP9	0.434245	0.008139	-0.37657	0.317823	-1.88469	0.059472	#ERROR!
ONECUT2	THAP9	-0.11368	0.50916	0.633333	0.067086	1.8846	0.059484	0/0
BNIP3P37	THAP9	0.241141	0.156543	-0.54772	0.12687	-1.88454	0.059492	0/0
LOC114841040	THAP9	0.048732	0.777759	-0.67082	0.047945	-1.88431	0.059523	0/-
PES1	THAP9	0.006823	0.968495	0.7	0.03577	1.88316	0.059679	0/+
CACNG8	THAP9	0.367689	0.02737	-0.44189	0.233702	-1.88284	0.059723	#ERROR!
FAM104B	THAP9	0.19131	0.26369	0.783333	0.01252	1.88265	0.059748	0/+
EDIL3	THAP9	0.545864	0.000574	-0.24268	0.529241	-1.88231	0.059794	#ERROR!
PTGDS	THAP9	0.084331	0.62484	-0.65	0.058073	-1.88174	0.059871	0/0
IGHV3-48	THAP9	0.236826	0.164321	-0.55	0.124977	-1.88165	0.059883	0/0
PRAMEF15	THAP9	-0.36881	0.026868	0.440386	0.235491	1.88157	0.059894	-/0
C16orf91	THAP9	0.041076	0.811989	0.716667	0.029818	1.88136	0.059922	0/+
ENTPD1	THAP9	0.514098	0.00134	-0.28333	0.46003	-1.88121	0.059943	#ERROR!
PARM1	THAP9	0.426263	0.009533	-0.38333	0.308495	-1.88054	0.060034	#ERROR!
LINC00994	THAP9	-0.23015	0.176899	0.554483	0.121299	1.88031	0.060065	0/0
ACNATP	THAP9	-0.23595	0.165931	0.55	0.124977	1.87963	0.060159	0/0
MPP6	THAP9	0.192726	0.260105	0.783333	0.01252	1.87943	0.060186	0/+
PEBP1	THAP9	0.113936	0.508195	0.75	0.019942	1.87888	0.060261	0/+
BGN	THAP9	0.42562	0.009654	-0.38333	0.308495	-1.87882	0.060269	#ERROR!
LOC374443	THAP9	0.326896	0.051656	-0.47699	0.194179	-1.87868	0.060288	0/0
PDP1	THAP9	0.551436	0.000491	-0.23333	0.545699	-1.87807	0.060371	#ERROR!
GRIK5	THAP9	0.129161	0.452791	-0.62187	0.073765	-1.8776	0.060436	0/0
MIR4285	THAP9	0.238075	0.162043	-0.54772	0.12687	-1.87742	0.060461	0/0
ISLR	THAP9	0.391761	0.018131	-0.41667	0.264586	-1.87671	0.060558	#ERROR!
FAM204A	THAP9	0.043386	0.801623	0.716667	0.029818	1.8763	0.060614	0/+
MARCHF3	THAP9	0.543032	0.000621	-0.24371	0.527446	-1.87589	0.06067	#ERROR!
AOC3	THAP9	0.36318	0.029471	-0.44352	0.231784	-1.87587	0.060673	#ERROR!
HERPUD1	THAP9	0.237142	0.163743	0.8	0.009628	1.87526	0.060757	0/+
LINC01762	THAP9	0.110696	0.520409	-0.63252	0.067548	-1.87501	0.060791	0/0
GXYLT2	THAP9	0.412863	0.012331	-0.39497	0.292769	-1.87497	0.060797	#ERROR!
PRDM5	THAP9	0.421012	0.010558	-0.38657	0.304082	-1.87485	0.060814	#ERROR!
GMCL1	THAP9	0.194799	0.254916	0.783333	0.01252	1.87471	0.060832	0/+
ABCG5	THAP9	-0.27704	0.101891	0.516667	0.15439	1.87391	0.060943	0/0
DPYS	THAP9	-0.02061	0.905034	0.683333	0.042442	1.87326	0.061033	0/+
PRRX1	THAP9	0.423329	0.010095	-0.38333	0.308495	-1.87271	0.061109	#ERROR!
RANBP1	THAP9	0.080077	0.642466	0.733333	0.024554	1.8726	0.061124	0/+
LINC02104	THAP9	0.054684	0.751424	-0.66452	0.050879	-1.8725	0.061137	0/0
ADA	THAP9	0.030254	0.860955	-0.67783	0.044809	-1.87194	0.061215	0/-
CUTA	THAP9	-0.20959	0.219879	0.566667	0.111633	1.87192	0.061217	0/0
MRPS18A	THAP9	0.080404	0.641104	0.733333	0.024554	1.87188	0.061224	0/+
MSTO1	THAP9	0.11717	0.496151	0.75	0.019942	1.87171	0.061247	0/+
KCNA1	THAP9	0.235599	0.166583	-0.54772	0.12687	-1.87168	0.061251	0/0
LINC02406	THAP9	0.395731	0.016893	-0.41079	0.272071	-1.87148	0.061279	#ERROR!
CAMK1G	THAP9	0.304135	0.071325	-0.49373	0.17676	-1.87128	0.061307	0/0
PTPRK	THAP9	0.43373	0.008223	0.866667	0.002495	1.87127	0.061307	#ERROR!
MS4A2	THAP9	0.359162	0.031454	-0.44539	0.22958	-1.87087	0.061363	#ERROR!
CRTC3	THAP9	0.684776	4.1e-06	-0.01667	0.966055	-1.87056	0.061406	#ERROR!
LAMP1	THAP9	0.117806	0.493798	0.75	0.019942	1.87029	0.061443	0/+
ARHGAP8	THAP9	0.417536	0.011286	-0.38822	0.301846	-1.86986	0.061503	#ERROR!
KRT71	THAP9	0.293337	0.082505	-0.50208	0.168415	-1.86963	0.061535	0/0
PPFIA2-AS1	THAP9	0.16055	0.349587	-0.59939	0.08803	-1.8693	0.061581	0/0
LDHD	THAP9	-0.10661	0.536007	0.633333	0.067086	1.86894	0.061631	0/0
CNRIP1	THAP9	0.274366	0.105373	-0.51667	0.15439	-1.86758	0.06182	0/0
RNA5SP441	THAP9	0.233653	0.170216	-0.54772	0.12687	-1.86717	0.061878	0/0
MIR624	THAP9	-0.23355	0.170418	0.547723	0.12687	1.86692	0.061913	0/0
ITM2A	THAP9	0.132612	0.440702	-0.61667	0.076929	-1.86681	0.061928	0/0
CDH26	THAP9	0.240382	0.157893	-0.54245	0.131319	-1.86636	0.061991	0/0
CCDC85B	THAP9	0.076735	0.656452	-0.65	0.058073	-1.86501	0.06218	0/0
PPIH	THAP9	-0.086	0.617983	0.644357	0.061033	1.86417	0.062298	0/0
CADM4	THAP9	0.369231	0.02668	-0.43333	0.243952	-1.86357	0.062383	#ERROR!
LOC100859919	THAP9	0.232064	0.173223	-0.54772	0.12687	-1.86349	0.062393	0/0
EFHC1	THAP9	0.19055	0.265628	-0.57741	0.103507	-1.86346	0.062397	0/0
GJC2	THAP9	0.31322	0.06287	-0.48333	0.18747	-1.86337	0.06241	0/0
EIF3B	THAP9	0.049308	0.775199	0.716667	0.029818	1.86331	0.062418	0/+
APOB	THAP9	-0.1308	0.447023	0.616667	0.076929	1.86278	0.062494	0/0
MALL	THAP9	0.355887	0.03315	-0.44539	0.22958	-1.86265	0.062511	#ERROR!
LZTS2	THAP9	0.40309	0.014785	-0.4	0.286105	-1.86238	0.06255	#ERROR!
APP	THAP9	0.159897	0.351576	0.766667	0.015944	1.86222	0.062572	0/+
BHLHE22	THAP9	0.130533	0.447965	-0.61667	0.076929	-1.86218	0.062578	0/0
DNAH3	THAP9	0.138216	0.421457	-0.61179	0.079966	-1.86218	0.062578	0/0
HOXC12	THAP9	0.123375	0.473453	-0.62106	0.074253	-1.86184	0.062626	0/0
LINC02247	THAP9	0.290042	0.086173	-0.50208	0.168415	-1.86175	0.062639	0/0
CALHM5	THAP9	0.40282	0.014858	-0.4	0.286105	-1.86167	0.062649	#ERROR!
HLF	THAP9	-0.13029	0.44883	0.616667	0.076929	1.86163	0.062656	0/0
FAM171B	THAP9	0.299749	0.075714	-0.49373	0.17676	-1.86071	0.062785	0/0
LOC100506100	THAP9	-0.10765	0.532033	0.630274	0.06883	1.86009	0.062873	0/0
AGPAT4	THAP9	0.391786	0.018123	-0.41005	0.27303	-1.8593	0.062985	#ERROR!
LOC102725072	THAP9	0.391009	0.018374	-0.41079	0.272071	-1.85925	0.062991	#ERROR!
HOXD1	THAP9	0.513978	0.001344	-0.27386	0.475797	-1.85838	0.063115	#ERROR!
ELMO1	THAP9	-0.12875	0.454243	0.616667	0.076929	1.85821	0.063139	0/0
HGFAC	THAP9	0.051825	0.764041	0.716667	0.029818	1.85779	0.063199	0/+
LINC00656	THAP9	0.229426	0.178299	-0.54772	0.12687	-1.8574	0.063255	0/0
CCT7	THAP9	0.087287	0.612712	0.733333	0.024554	1.85671	0.063353	0/+
BCL11B	THAP9	0.225941	0.185166	-0.55	0.124977	-1.85649	0.063384	0/0
IMMT	THAP9	0.008497	0.960773	0.694567	0.037864	1.85635	0.063403	0/+
MOGAT1	THAP9	0.431602	0.00858	-0.3682	0.32956	-1.85631	0.06341	#ERROR!
PODXL	THAP9	0.416994	0.011403	-0.38333	0.308495	-1.85587	0.063472	#ERROR!
MRPS15	THAP9	-0.38365	0.020897	0.416667	0.264586	1.85582	0.06348	-/0
ITGB7	THAP9	0.247457	0.145646	-0.53333	0.139227	-1.85474	0.063633	0/0
COL4A2	THAP9	0.416221	0.011572	-0.38333	0.308495	-1.85383	0.063764	#ERROR!
ACE	THAP9	0.382773	0.021216	-0.41667	0.264586	-1.85357	0.063801	#ERROR!
CCT4	THAP9	0.163759	0.33991	0.766667	0.015944	1.85354	0.063805	0/+
PLGLA	THAP9	0.020497	0.905549	0.7	0.03577	1.85323	0.06385	0/+
GCLC	THAP9	0.125523	0.465726	0.75	0.019942	1.85315	0.063861	0/+
C11orf58	THAP9	0.49617	0.002087	0.883333	0.001591	1.85263	0.063936	#ERROR!
PUM3	THAP9	0.388156	0.01932	0.85	0.003705	1.85263	0.063936	#ERROR!
LINC02328	THAP9	-0.12154	0.480093	-0.74793	0.020482	-1.85165	0.064075	0/-
RNF167	THAP9	-0.01069	0.95068	0.683333	0.042442	1.85153	0.064093	0/+
MIR6769A	THAP9	0.321364	0.055982	-0.47216	0.199378	-1.85151	0.064096	0/0
C11orf16	THAP9	0.11439	0.506497	-0.62361	0.072726	-1.851	0.06417	0/0
MAIP1	THAP9	0.054976	0.750138	0.716667	0.029818	1.85088	0.064188	0/+
KRT6C	THAP9	0.429151	0.009007	-0.36853	0.329101	-1.85054	0.064235	#ERROR!
PAM	THAP9	0.069907	0.685379	-0.65	0.058073	-1.84999	0.064316	0/0
BHMT2	THAP9	0.022146	0.897987	0.7	0.03577	1.84962	0.064369	0/+
ANKRD19P	THAP9	0.419473	0.010875	-0.37816	0.315613	-1.84922	0.064426	#ERROR!
PDLIM4	THAP9	0.230992	0.175273	-0.54394	0.130055	-1.84922	0.064427	0/0
HSD17B4	THAP9	0.248471	0.143949	0.8	0.009628	1.84891	0.06447	0/+
PDE1B	THAP9	0.244801	0.15016	-0.53333	0.139227	-1.84856	0.064522	0/0
OPRL1	THAP9	0.359111	0.03148	-0.43699	0.239545	-1.84791	0.064616	#ERROR!
RN7SL566P	THAP9	0.486136	0.002647	0.879834	0.001758	1.84719	0.06472	#ERROR!
CSKMT	THAP9	0.145773	0.396262	-0.60252	0.085953	-1.84689	0.064763	0/0
ATP2B4	THAP9	0.444802	0.006565	-0.35	0.35582	-1.84632	0.064846	#ERROR!
CCDC144B	THAP9	0.258376	0.128131	0.803354	0.009106	1.84629	0.06485	0/+
MIR3680-1	THAP9	0.385817	0.020126	-0.41079	0.272071	-1.84587	0.064911	#ERROR!
EHD2	THAP9	0.379401	0.022481	-0.41667	0.264586	-1.84493	0.065047	#ERROR!
ESR1	THAP9	0.057695	0.738206	0.716667	0.029818	1.84491	0.065051	0/+
MIR101-2	THAP9	0.014414	0.933504	0.694879	0.037741	1.84472	0.065078	0/+
INAFM1	THAP9	-0.03605	0.834656	-0.70591	0.033579	-1.84472	0.065078	0/-
PDXDC2P	THAP9	0.523932	0.00104	-0.25538	0.507201	-1.84469	0.065082	#ERROR!
GMIP	THAP9	0.341423	0.041556	-0.45189	0.222039	-1.84441	0.065124	#ERROR!
NKILA	THAP9	0.282459	0.095092	-0.50224	0.168255	-1.84415	0.065162	0/0
EEF1GP7	THAP9	0.115051	0.504028	-0.62106	0.074253	-1.84335	0.065277	0/0
PRAMEF33	THAP9	-0.18264	0.28636	0.576354	0.10429	1.84205	0.065468	0/0
MAGOH	THAP9	0.059092	0.732094	0.716667	0.029818	1.84184	0.065499	0/+
LRRC37B	THAP9	0.434044	0.008172	-0.35984	0.341509	-1.84177	0.065509	#ERROR!
FUT2	THAP9	0.485771	0.002669	-0.30126	0.430823	-1.84144	0.065558	#ERROR!
CALCRL	THAP9	0.427422	0.009319	-0.36667	0.33174	-1.8412	0.065592	#ERROR!
FGF1	THAP9	0.447763	0.006174	-0.34455	0.363871	-1.84085	0.065644	#ERROR!
ADAMTS7P1	THAP9	0.203409	0.234096	-0.56125	0.115872	-1.8404	0.065709	0/0
HNF4A-AS1	THAP9	0.026457	0.878266	0.7	0.03577	1.84017	0.065742	0/+
MTCYBP41	THAP9	-0.22187	0.193428	0.547723	0.12687	1.83997	0.065773	0/0
RN7SL246P	THAP9	0.383452	0.020969	-0.41079	0.272071	-1.8398	0.065798	#ERROR!
GBA	THAP9	0.169939	0.321744	0.766667	0.015944	1.83963	0.065823	0/+
LINC02018	THAP9	-0.08435	0.624745	0.638291	0.064319	1.83799	0.066063	0/0
MBTPS2	THAP9	0.393949	0.017439	0.85	0.003705	1.83766	0.066113	#ERROR!
PCDHB15	THAP9	0.250274	0.140969	-0.5255	0.14624	-1.83749	0.066137	0/0
KCNK2	THAP9	-0.05463	0.751642	0.655468	0.055293	1.83728	0.066168	0/0
FIGNL2	THAP9	0.247873	0.144949	-0.5272	0.144699	-1.83704	0.066203	0/0
FZD6	THAP9	0.68542	3.98e-06	0	1	-1.83674	0.066249	#ERROR!
AGMO	THAP9	0.17143	0.317452	0.766667	0.015944	1.83627	0.066318	0/+
OSER1	THAP9	0.446626	0.006322	0.866667	0.002495	1.83627	0.066318	#ERROR!
HINFP	THAP9	0.490892	0.002367	-0.29289	0.444355	-1.83606	0.066348	#ERROR!
IGHV1-14	THAP9	0.153549	0.371269	-0.59406	0.091642	-1.83548	0.066434	0/0
MTMR8	THAP9	0.359967	0.031049	-0.43129	0.246433	-1.83469	0.066552	#ERROR!
CBR1	THAP9	-0.19311	0.259132	0.566667	0.111633	1.83433	0.066605	0/0
HR	THAP9	0.373399	0.024887	-0.41841	0.262381	-1.83426	0.066615	#ERROR!
IL34	THAP9	0.338848	0.04322	-0.45	0.224216	-1.83285	0.066825	#ERROR!
GPR132	THAP9	0.200721	0.240469	-0.56067	0.116327	-1.83243	0.066887	0/0
MTHFD1	THAP9	0.06347	0.71306	0.716667	0.029818	1.83222	0.066918	0/+
BCAS3	THAP9	0.135179	0.431829	0.75	0.019942	1.83166	0.067003	0/+
BAG2	THAP9	0.098745	0.56667	0.733333	0.024554	1.83141	0.067039	0/+
ICA1	THAP9	0.299968	0.07549	-0.48333	0.18747	-1.83136	0.067047	0/0
DPY19L3	THAP9	0.636756	2.98e-05	-0.08333	0.831214	-1.83008	0.067238	#ERROR!
PPP1R1B	THAP9	0.265812	0.117133	-0.51075	0.15999	-1.82981	0.067278	0/0
C10orf82	THAP9	0.308704	0.066968	-0.47527	0.196023	-1.82952	0.067321	0/0
LINC02679	THAP9	0.379411	0.022477	-0.41079	0.272071	-1.82945	0.067333	#ERROR!
FILIP1	THAP9	0.423008	0.010158	-0.36667	0.33174	-1.82941	0.067339	#ERROR!
CCR3	THAP9	0.118027	0.492983	-0.61519	0.077844	-1.82916	0.067376	0/0
LYPD3	THAP9	0.298996	0.076488	-0.48333	0.18747	-1.82902	0.067396	0/0
IQGAP3	THAP9	0.28645	0.090314	-0.49373	0.17676	-1.82887	0.067419	0/0
CDC42EP3	THAP9	0.373093	0.025015	-0.41667	0.264586	-1.82885	0.067422	#ERROR!
GSTK1	THAP9	-0.08819	0.609034	0.633333	0.067086	1.82823	0.067515	0/0
ADIRF-AS1	THAP9	0.453199	0.005507	-0.33333	0.380713	-1.82804	0.067543	#ERROR!
FGF20	THAP9	-0.41674	0.011458	0.372678	0.323259	1.828	0.06755	-/0
GPS2	THAP9	0.190176	0.266585	-0.56667	0.111633	-1.82766	0.067601	0/0
LOC101928731	THAP9	0.321413	0.055942	-0.46342	0.208986	-1.82713	0.06768	0/0
RN7SL313P	THAP9	0.37509	0.024188	-0.41404	0.26792	-1.82699	0.067702	#ERROR!
PCSK5	THAP9	0.212681	0.213	-0.55	0.124977	-1.826	0.067851	0/0
MIR3685	THAP9	0.30246	0.072977	-0.47901	0.192031	-1.82504	0.067995	0/0
ATP5F1BP1	THAP9	0.215318	0.207248	-0.54772	0.12687	-1.82491	0.068014	0/0
GALNT16	THAP9	0.234453	0.168714	-0.53333	0.139227	-1.82453	0.068072	0/0
BRWD1-AS2	THAP9	0.123307	0.473698	0.743216	0.021743	1.82453	0.068072	0/+
MARCHF1	THAP9	0.234438	0.168742	-0.53333	0.139227	-1.8245	0.068077	0/0
PKD1P6-NPIPP1	THAP9	0.363888	0.029133	-0.42379	0.255659	-1.82447	0.06808	#ERROR!
LRRC38	THAP9	0.214755	0.208467	-0.54772	0.12687	-1.82362	0.068209	0/0
PRSS45P	THAP9	0.370339	0.026193	-0.41712	0.264018	-1.82305	0.068296	#ERROR!
FLJ13224	THAP9	0.065271	0.705277	-0.6455	0.060427	-1.82281	0.068331	0/0
CFHR2	THAP9	-0.32312	0.054582	0.460255	0.212522	1.82249	0.068381	0/0
LINC02475	THAP9	0.214146	0.209791	-0.54772	0.12687	-1.82222	0.068421	0/0
PRR13	THAP9	-0.40412	0.014508	0.383333	0.308495	1.82198	0.068458	-/0
FLJ33534	THAP9	0.438915	0.007407	-0.34655	0.360904	-1.82172	0.068497	#ERROR!
PCDHB17P	THAP9	0.128575	0.454862	-0.60622	0.083533	-1.8213	0.068562	0/0
C12orf56	THAP9	-0.07552	0.661566	0.63901	0.063924	1.82119	0.068578	0/0
ABCC1	THAP9	0.352366	0.035056	-0.43333	0.243952	-1.82113	0.068587	#ERROR!
MRPS2	THAP9	0.035404	0.837579	0.7	0.03577	1.82058	0.068671	0/+
KL	THAP9	0.25145	0.13905	-0.51883	0.152367	-1.82018	0.068731	0/0
PSMD8	THAP9	0.178693	0.297067	0.766667	0.015944	1.81987	0.068779	0/+
ABRAXAS2	THAP9	0.507403	0.001585	0.883333	0.001591	1.81977	0.068794	#ERROR!
ELAPOR2	THAP9	0.137367	0.42434	-0.6	0.087623	-1.8195	0.068836	0/0
LINC02875	THAP9	0.379075	0.022606	-0.40724	0.276655	-1.81924	0.068875	#ERROR!
CENPM	THAP9	0.179594	0.294597	-0.57145	0.10797	-1.81916	0.068887	0/0
AP1G2	THAP9	0.386225	0.019983	-0.4	0.286105	-1.81866	0.068964	#ERROR!
LAMA5-AS1	THAP9	-0.1619	0.345498	0.583333	0.099186	1.81829	0.06902	0/0
RGS19	THAP9	-0.00451	0.979192	-0.68333	0.042442	-1.81829	0.069021	0/-
PROCR	THAP9	0.294451	0.081292	-0.48333	0.18747	-1.81812	0.069046	0/0
DEFA4	THAP9	0.023476	0.891896	0.693167	0.038416	1.81765	0.069117	0/+
LOC101928402	THAP9	-0.15172	0.377077	0.589938	0.094499	1.81748	0.069144	0/0
BUD31	THAP9	-0.13595	0.429178	0.6	0.087623	1.81634	0.069318	0/0
LOC646588	THAP9	0.195748	0.252561	-0.55902	0.117646	-1.81582	0.069398	0/0
PHGDH	THAP9	0.037979	0.825941	0.7	0.03577	1.81493	0.069534	0/+
LAPTM4A	THAP9	0.142774	0.406153	0.75	0.019942	1.8147	0.069569	0/+
HOXD9	THAP9	0.25649	0.13104	-0.51299	0.157859	-1.81454	0.069594	0/0
CSP2	THAP9	0.523608	0.001048	-0.24261	0.529366	-1.81392	0.06969	#ERROR!
AKR1B10	THAP9	-0.10428	0.545009	0.619252	0.075347	1.81307	0.069821	0/0
CCDC80	THAP9	0.38365	0.020897	-0.4	0.286105	-1.81204	0.06998	#ERROR!
LINC02872	THAP9	0.417794	0.01123	-0.36526	0.333744	-1.81198	0.069989	#ERROR!
ITGA11	THAP9	0.530029	0.000885	-0.23333	0.545699	-1.81186	0.070008	#ERROR!
MIR4692	THAP9	-0.08915	0.605115	-0.72457	0.027239	-1.81166	0.070038	0/-
CYTOR	THAP9	0.225813	0.185423	-0.53557	0.137262	-1.81141	0.070077	0/0
POLR2K	THAP9	0.355221	0.033504	0.833333	0.005266	1.81108	0.070129	#ERROR!
MYH13	THAP9	0.432964	0.00835	-0.34861	0.357867	-1.81076	0.070177	#ERROR!
RN7SL219P	THAP9	0.268108	0.113883	-0.50208	0.168415	-1.80969	0.070344	0/0
AKR7A2	THAP9	-0.2055	0.229225	0.55	0.124977	1.80956	0.070364	0/0
EXOC4	THAP9	0.355842	0.033174	0.833333	0.005266	1.80952	0.07037	#ERROR!
MIR106B	THAP9	0.055287	0.748773	0.707475	0.033013	1.80938	0.070391	0/+
GADD45G	THAP9	-0.27033	0.110808	0.5	0.170471	1.80885	0.070474	0/0
CCR5	THAP9	-0.04081	0.81317	-0.7	0.03577	-1.80872	0.070494	0/-
HAO1	THAP9	-0.15751	0.358891	0.583333	0.099186	1.80844	0.070537	0/0
RN7SL184P	THAP9	-0.41606	0.011608	0.365148	0.333899	1.80711	0.070746	-/0
MARK1	THAP9	0.201185	0.239362	-0.55231	0.123077	-1.80696	0.070768	0/0
RFXAP	THAP9	0.515323	0.001298	-0.25	0.51649	-1.80631	0.07087	#ERROR!
ALG2	THAP9	0.310802	0.065039	0.816667	0.007225	1.80616	0.070894	0/+
LINC02027	THAP9	-0.07809	0.650756	0.633333	0.067086	1.80598	0.070921	0/0
KLK13	THAP9	0.192566	0.260508	-0.55777	0.118641	-1.80463	0.071132	0/0
GRAMD4P8	THAP9	0.459795	0.004783	-0.31623	0.407084	-1.80442	0.071165	#ERROR!
HOXA7	THAP9	0.262716	0.121622	-0.50461	0.165932	-1.80441	0.071168	0/0
HDLBP	THAP9	0.357902	0.032098	0.833333	0.005266	1.80436	0.071175	#ERROR!
PLAAT5	THAP9	0.246298	0.147604	-0.51755	0.153564	-1.80432	0.071181	0/0
CT45A11P	THAP9	0.414827	0.011882	-0.36526	0.333744	-1.80413	0.071211	#ERROR!
LOC645405	THAP9	0.206219	0.227559	-0.54772	0.12687	-1.80407	0.07122	0/0
ISYNA1	THAP9	0.246926	0.14654	-0.51667	0.15439	-1.80315	0.071365	0/0
HM13-AS1	THAP9	0.174195	0.309592	0.761513	0.017117	1.80293	0.0714	0/+
DRG1	THAP9	0.111619	0.516915	0.733333	0.024554	1.80292	0.0714	0/+
LMBR1L	THAP9	0.428709	0.009086	-0.35	0.35582	-1.8028	0.07142	#ERROR!
DNTTIP2	THAP9	0.001416	0.99346	0.67783	0.044809	1.80261	0.071449	0/+
PLPPR2	THAP9	0.38674	0.019805	-0.39331	0.29499	-1.8026	0.071451	#ERROR!
FLNA	THAP9	0.362536	0.029782	-0.41667	0.264586	-1.80213	0.071524	#ERROR!
DRGX	THAP9	0.204969	0.230452	-0.54772	0.12687	-1.80122	0.071669	0/0
CARD14	THAP9	0.458221	0.004948	-0.31667	0.406397	-1.80113	0.071683	#ERROR!
LOC100286997	THAP9	0.5637	0.000343	-0.18257	0.63824	-1.80089	0.071721	#ERROR!
CXorf56	THAP9	0.359318	0.031375	0.833333	0.005266	1.8008	0.071734	#ERROR!
FAM178B	THAP9	0.201954	0.237532	-0.54973	0.125202	-1.80062	0.071764	0/0
LOC100505978	THAP9	-0.06608	0.701768	0.63901	0.063924	1.80044	0.071792	0/0
ITGBL1	THAP9	0.538783	0.000699	-0.21667	0.575515	-1.80025	0.071821	#ERROR!
MUL1	THAP9	0.113042	0.51155	0.733333	0.024554	1.79977	0.071897	0/+
CEBPZOS	THAP9	-0.10223	0.552997	0.616667	0.076929	1.79937	0.071959	0/0
MAOB	THAP9	0.269842	0.111475	0.8	0.009628	1.79877	0.072055	0/+
PPIAP37	THAP9	0.203456	0.233986	-0.54772	0.12687	-1.79776	0.072215	0/0
LINC00294	THAP9	0.152697	0.37396	-0.58333	0.099186	-1.79764	0.072234	0/0
FENDRR	THAP9	0.300619	0.074827	-0.4706	0.20107	-1.79686	0.072357	0/0
H4C8	THAP9	0.127745	0.457804	0.739522	0.022768	1.79671	0.072381	0/+
EZR	THAP9	0.114451	0.506267	0.733333	0.024554	1.79664	0.072392	0/+
BRSK2	THAP9	0.129354	0.45211	-0.59849	0.088636	-1.79648	0.072419	0/0
LOX	THAP9	0.441326	0.007052	-0.33333	0.380713	-1.79556	0.072565	#ERROR!
CHCHD10	THAP9	-0.22182	0.193523	0.533333	0.139227	1.79537	0.072595	0/0
FCHSD1	THAP9	0.24345	0.152493	-0.51667	0.15439	-1.79506	0.072645	0/0
GAREM2	THAP9	0.135316	0.431357	-0.59415	0.091583	-1.79502	0.072651	0/0
CAPZA1	THAP9	-0.01519	0.929927	0.666667	0.049867	1.79438	0.072753	0/+
NUTM2F	THAP9	0.142063	0.408519	-0.58919	0.095021	-1.79339	0.072911	0/0
LINC01449	THAP9	0.290059	0.086153	-0.47809	0.193006	-1.79269	0.073023	0/0
NPAP1	THAP9	-0.24341	0.152561	0.515879	0.155129	1.79262	0.073034	0/0
EPHX1	THAP9	0.081493	0.636576	0.716667	0.029818	1.79257	0.073042	0/+
DCBLD2	THAP9	-0.01429	0.93407	0.666667	0.049867	1.79241	0.073067	0/+
CDCA4	THAP9	0.322369	0.055175	-0.45	0.224216	-1.79236	0.073075	0/0
FTH1P2	THAP9	-0.05319	0.758015	0.644357	0.061033	1.79201	0.073132	0/0
PCYOX1L	THAP9	0.263148	0.120989	-0.5	0.170471	-1.79193	0.073144	0/0
KCNJ12	THAP9	0.34761	0.037771	-0.42678	0.251957	-1.79168	0.073184	#ERROR!
PYGM	THAP9	0.340395	0.042214	-0.43333	0.243952	-1.79136	0.073235	#ERROR!
LINC00092	THAP9	0.197435	0.248416	-0.55	0.124977	-1.79117	0.073267	0/0
GNAL	THAP9	0.408266	0.013439	-0.36667	0.33174	-1.7904	0.073389	#ERROR!
PTGS1	THAP9	0.408137	0.013471	-0.36667	0.33174	-1.79007	0.073443	#ERROR!
LINC01500	THAP9	0.199899	0.24244	-0.54772	0.12687	-1.78965	0.073511	0/0
B4GALT6	THAP9	0.192095	0.261699	0.766667	0.015944	1.7895	0.073535	0/+
FAM66B	THAP9	0.428783	0.009073	-0.34455	0.363871	-1.78943	0.073545	#ERROR!
PDE3B	THAP9	-0.12374	0.472148	0.6	0.087623	1.78915	0.073591	0/0
DUSP7	THAP9	0.429997	0.008858	-0.3431	0.366029	-1.78909	0.073601	#ERROR!
CRISPLD2	THAP9	0.423431	0.010075	-0.35	0.35582	-1.78868	0.073666	#ERROR!
HMGCL	THAP9	-0.04184	0.808554	0.65	0.058073	1.78837	0.073717	0/0
NAALADL1	THAP9	0.169306	0.323576	-0.56904	0.109804	-1.78813	0.073754	0/0
BATF2	THAP9	0.24036	0.157931	-0.51667	0.15439	-1.78787	0.073796	0/0
CCR2	THAP9	0.065276	0.705253	-0.63599	0.065595	-1.78752	0.073853	0/0
ADGRL4	THAP9	0.356614	0.032767	-0.41667	0.264586	-1.78725	0.073897	#ERROR!
PSMC5	THAP9	-0.1478	0.389671	0.583333	0.099186	1.78666	0.073992	0/0
LINC00867	THAP9	-0.12825	0.456005	0.596285	0.090125	1.78653	0.074014	0/0
IZUMO1	THAP9	0.34041	0.042204	-0.43129	0.246433	-1.7859	0.074115	#ERROR!
RNA5SP440	THAP9	-0.19823	0.246478	0.547723	0.12687	1.78584	0.074125	0/0
LINC02068	THAP9	0.224923	0.187208	0.779773	0.013205	1.78572	0.074144	0/+
FGGY	THAP9	0.084712	0.623272	0.716667	0.029818	1.78547	0.074184	0/+
MIGA1	THAP9	0.234052	0.169465	0.783333	0.01252	1.78465	0.074317	0/+
RALA	THAP9	0.156292	0.36268	0.75	0.019942	1.78444	0.074352	0/+
PHETA2	THAP9	0.437206	0.007668	-0.33333	0.380713	-1.78439	0.074361	#ERROR!
APEH	THAP9	0.15656	0.361849	0.75	0.019942	1.78384	0.074449	0/+
NAT14	THAP9	0.00515	0.97622	-0.66946	0.048568	-1.78345	0.074513	0/-
LOC101928674	THAP9	0.009213	0.957469	-0.66717	0.04963	-1.78329	0.074539	0/-
LINC01340	THAP9	0.126692	0.461549	-0.59628	0.090125	-1.78306	0.074577	0/0
CSF2RA	THAP9	0.166989	0.33034	-0.56904	0.109804	-1.78292	0.0746	0/0
MYT1L	THAP9	0.205953	0.228172	-0.54086	0.132677	-1.78213	0.074728	0/0
PLEKHG4B	THAP9	0.220148	0.196992	-0.53009	0.142107	-1.78162	0.074812	0/0
LINC00618	THAP9	0.195928	0.252118	-0.54772	0.12687	-1.7806	0.074977	0/0
LOC100507389	THAP9	-0.19279	0.259955	0.55	0.124977	1.78059	0.07498	0/0
FXYD6	THAP9	0.192469	0.260754	-0.55	0.124977	-1.77987	0.075098	0/0
OGFOD2	THAP9	0.19633	0.251127	0.766667	0.015944	1.77986	0.075098	0/+
PRR5L	THAP9	0.298037	0.077483	-0.46667	0.205386	-1.77961	0.075139	0/0
RAB41	THAP9	0.023006	0.894052	-0.65828	0.053897	-1.77878	0.075276	0/0
LOC101928590	THAP9	-0.11613	0.499993	-0.7303	0.025464	-1.7786	0.075305	0/-
ABLIM2	THAP9	0.353138	0.03463	-0.41667	0.264586	-1.77854	0.075314	#ERROR!
MRTFA-AS1	THAP9	0.161037	0.348109	-0.57173	0.10776	-1.77823	0.075365	0/0
C17orf100	THAP9	0.19158	0.263004	-0.55	0.124977	-1.77785	0.075429	0/0
PPP2R2B	THAP9	0.387103	0.019679	-0.38333	0.308495	-1.77783	0.075432	#ERROR!
MTURN	THAP9	0.589894	0.000153	-0.13389	0.731279	-1.77751	0.075484	#ERROR!
ACADS	THAP9	-0.09231	0.592342	0.616667	0.076929	1.77746	0.075493	0/0
LINC01140	THAP9	0.213917	0.21029	-0.53333	0.139227	-1.77721	0.075534	0/0
RN7SL320P	THAP9	0.334896	0.045876	-0.43301	0.244341	-1.77692	0.075582	#ERROR!
HES5	THAP9	0.056255	0.744517	-0.63829	0.064319	-1.77619	0.075702	0/0
KLHL32	THAP9	0.18909	0.269376	0.762821	0.016814	1.77605	0.075725	0/+
NT5C1A	THAP9	0.193907	0.25714	-0.54772	0.12687	-1.77601	0.075732	0/0
PDK4	THAP9	0.237786	0.162568	0.783333	0.01252	1.776	0.075733	0/+
CLNS1A	THAP9	0.237786	0.162568	0.783333	0.01252	1.776	0.075733	0/+
ACTG1P15	THAP9	0.497192	0.002036	-0.25981	0.499599	-1.77591	0.075748	#ERROR!
RHOJ	THAP9	0.386353	0.019938	-0.38333	0.308495	-1.7759	0.075749	#ERROR!
CTSZ	THAP9	0.123849	0.471741	0.733333	0.024554	1.77578	0.075769	0/+
COBLL1	THAP9	0.468491	0.003954	0.866667	0.002495	1.77574	0.075776	#ERROR!
ANOS1	THAP9	0.315546	0.060838	-0.45	0.224216	-1.77574	0.075776	0/0
EMCN	THAP9	0.276426	0.10268	-0.48333	0.18747	-1.77517	0.07587	0/0
LOC100419654	THAP9	0.042293	0.806526	0.69282	0.038554	1.77497	0.075903	0/+
OCIAD2	THAP9	-0.16685	0.33075	0.566667	0.111633	1.77493	0.07591	0/0
GS1-204I12.4	THAP9	0.357843	0.032128	-0.41079	0.272071	-1.77482	0.075928	#ERROR!
LRRC47	THAP9	0.16068	0.349192	0.75	0.019942	1.77459	0.075965	0/+
LOC105370906	THAP9	0.543291	0.000617	-0.19929	0.607216	-1.77444	0.07599	#ERROR!
CRAT	THAP9	-0.09089	0.598057	0.616667	0.076929	1.77433	0.076008	0/0
IGLV6-57	THAP9	0.212662	0.213043	-0.53333	0.139227	-1.77433	0.076009	0/0
GABRA4	THAP9	0.387733	0.019464	-0.38124	0.311366	-1.77409	0.076048	#ERROR!
DMBX1	THAP9	0.192929	0.259593	-0.54772	0.12687	-1.77378	0.076099	0/0
HMGB3P6	THAP9	-0.53726	0.000728	0.20702	0.593036	1.77345	0.076154	-/0
DIO1	THAP9	-0.21221	0.214046	0.533333	0.139227	1.77329	0.076181	0/0
OGDHL	THAP9	0.057161	0.740543	0.7	0.03577	1.77286	0.076252	0/+
RNU4-89P	THAP9	0.33254	0.047521	-0.43361	0.243613	-1.77273	0.076273	#ERROR!
KRTDAP	THAP9	0.314449	0.06179	-0.44956	0.224725	-1.77186	0.076417	0/0
KRT18P10	THAP9	-0.29992	0.075536	0.462201	0.210342	1.77168	0.076447	0/0
LINC02688	THAP9	0.482295	0.002894	-0.27615	0.471962	-1.77156	0.076468	#ERROR!
DPT	THAP9	0.034001	0.843935	-0.65	0.058073	-1.77118	0.07653	0/0
DIPK2B	THAP9	0.331788	0.048056	-0.43333	0.243952	-1.77013	0.076706	#ERROR!
CCN5	THAP9	0.16452	0.33764	-0.56667	0.111633	-1.76969	0.076779	0/0
METTL2A	THAP9	0.12669	0.461556	0.733333	0.024554	1.76946	0.076816	0/+
PRSS30P	THAP9	-0.12117	0.481473	0.59588	0.0904	1.7694	0.076827	0/0
IMPDH1	THAP9	0.232121	0.173114	-0.51667	0.15439	-1.76878	0.076931	0/0
APOBEC3G	THAP9	0.088317	0.60851	-0.61667	0.076929	-1.76865	0.076952	0/0
GRM3	THAP9	0.257841	0.128951	-0.49589	0.174578	-1.76751	0.077142	0/0
LOC105371046	THAP9	0.614468	6.7e-05	-0.09129	0.815318	-1.76746	0.077151	#ERROR!
PRRG1	THAP9	0.372602	0.025222	0.833333	0.005266	1.76723	0.07719	#ERROR!
ANKRD27	THAP9	0.668169	8.47e-06	0	1	-1.76706	0.077218	#ERROR!
MEX3B	THAP9	0.194863	0.254756	-0.54394	0.130055	-1.76638	0.077332	0/0
RBMS2	THAP9	0.292501	0.083424	-0.46667	0.205386	-1.76634	0.077339	0/0
BUB1B	THAP9	0.206115	0.227799	-0.53557	0.137262	-1.7662	0.077363	0/0
NAT2	THAP9	-0.31149	0.064413	0.45	0.224216	1.7659	0.077413	0/0
LRRTM4	THAP9	0.128302	0.455829	0.733333	0.024554	1.76588	0.077416	0/+
PTF1A	THAP9	0.189341	0.268728	-0.54772	0.12687	-1.76563	0.077458	0/0
MUC19	THAP9	-0.07976	0.643786	0.621059	0.074253	1.76537	0.077501	0/0
LIPG	THAP9	0.028967	0.866817	0.683333	0.042442	1.76473	0.077608	0/+
CRYGN	THAP9	0.080907	0.639012	0.710047	0.032098	1.76436	0.077672	0/+
HPN	THAP9	-0.08626	0.616927	0.616667	0.076929	1.76411	0.077714	0/0
DMGDH	THAP9	-0.00129	0.994053	0.666667	0.049867	1.76395	0.077741	0/+
ADAMTS7P3	THAP9	0.301189	0.074251	-0.45817	0.214871	-1.76354	0.077809	0/0
KCND1	THAP9	0.095146	0.580959	-0.61088	0.080542	-1.76342	0.07783	0/0
GLIPR1L1	THAP9	0.171578	0.317029	-0.5596	0.117182	-1.76293	0.077913	0/0
CCT2	THAP9	0.203798	0.233185	0.766667	0.015944	1.76284	0.077928	0/+
RN7SL269P	THAP9	0.583369	0.000188	-0.13693	0.725369	-1.76251	0.077983	#ERROR!
HSP90B1	THAP9	-0.08548	0.620096	0.616667	0.076929	1.76241	0.078001	0/0
CENPT	THAP9	0.364081	0.029041	-0.4	0.286105	-1.76225	0.078027	#ERROR!
HACL1	THAP9	0.328956	0.050115	0.816667	0.007225	1.7619	0.078087	0/+
LOC106660606	THAP9	-0.03044	0.860128	-0.68333	0.042442	-1.76152	0.078151	0/-
PTPN22	THAP9	0.094245	0.584563	-0.61088	0.080542	-1.76143	0.078166	0/0
CNPY4	THAP9	0.363695	0.029225	-0.4	0.286105	-1.76128	0.078191	#ERROR!
KBTBD7	THAP9	0.473769	0.003514	0.866667	0.002495	1.76089	0.078257	#ERROR!
RELL1	THAP9	0.443564	0.006735	-0.31667	0.406397	-1.76087	0.078261	#ERROR!
RN7SL47P	THAP9	0.18718	0.274332	-0.54772	0.12687	-1.76073	0.078284	0/0
JOSD2	THAP9	0.06695	0.698047	-0.62762	0.070365	-1.76072	0.078286	0/0
CES5A	THAP9	-0.16042	0.349973	0.566667	0.111633	1.76048	0.078327	0/0
PWP1	THAP9	0.062955	0.715291	0.7	0.03577	1.76013	0.078385	0/+
C6	THAP9	-0.30911	0.066593	0.45	0.224216	1.76013	0.078387	0/0
GALNT6	THAP9	0.192082	0.26173	-0.54394	0.130055	-1.76006	0.078398	0/0
BDNF	THAP9	0.559078	0.000394	-0.171	0.660026	-1.75996	0.078415	#ERROR!
COL8A1	THAP9	0.606501	8.82e-05	-0.1	0.797972	-1.75891	0.078593	#ERROR!
INTS5	THAP9	0.423946	0.009974	0.85	0.003705	1.75881	0.078609	#ERROR!
CERT1	THAP9	0.375925	0.023849	0.833333	0.005266	1.75877	0.078616	#ERROR!
ARHGEF25	THAP9	0.289282	0.087036	-0.46667	0.205386	-1.75865	0.078638	0/0
CYP19A1	THAP9	0.182437	0.286893	-0.55048	0.124578	-1.75863	0.078641	0/0
GLRX5	THAP9	0.063727	0.711946	0.7	0.03577	1.75843	0.078674	0/+
GPC2	THAP9	0.129082	0.45307	-0.58737	0.096307	-1.75834	0.07869	0/0
BATF	THAP9	0.213623	0.210932	-0.5272	0.144699	-1.75786	0.078771	0/0
IGLV9-49	THAP9	0.191098	0.26423	-0.54394	0.130055	-1.75782	0.078778	0/0
P2RY8	THAP9	0.268958	0.112698	-0.48333	0.18747	-1.75751	0.078831	0/0
ACTR3C	THAP9	-0.02279	0.895045	0.652725	0.056677	1.75699	0.07892	0/0
HOXA2	THAP9	0.265807	0.117139	-0.48536	0.185354	-1.75588	0.079109	0/0
ADGRF5	THAP9	0.536724	0.000739	-0.2	0.605901	-1.75578	0.079126	#ERROR!
CNTN3	THAP9	-0.08241	0.632795	0.616667	0.076929	1.75562	0.079153	0/0
MTCO2P21	THAP9	0.114737	0.505198	0.724569	0.027239	1.75508	0.079246	0/+
FBN1	THAP9	0.484326	0.002761	-0.26667	0.487922	-1.75494	0.079269	#ERROR!
CBX6	THAP9	0.360476	0.030794	-0.4	0.286105	-1.75317	0.079573	#ERROR!
AGR3	THAP9	0.464636	0.004305	-0.28854	0.451456	-1.7512	0.079911	#ERROR!
CAP1	THAP9	0.035275	0.838162	0.683333	0.042442	1.75091	0.079961	0/+
COL6A3	THAP9	0.408883	0.013285	-0.35	0.35582	-1.75018	0.080088	#ERROR!
PRX	THAP9	0.444416	0.006618	-0.31094	0.415407	-1.74927	0.080244	#ERROR!
IYD	THAP9	-0.1057	0.539531	0.6	0.087623	1.74914	0.080267	0/0
PYGO1	THAP9	0.309521	0.066212	-0.44539	0.22958	-1.74852	0.080375	0/0
NPIPB11	THAP9	0.318902	0.057997	-0.43699	0.239545	-1.74846	0.080384	0/0
PDCL3P6	THAP9	-0.18165	0.289026	0.547723	0.12687	1.74819	0.080431	0/0
MIR4258	THAP9	0.483276	0.002829	-0.26473	0.491203	-1.74739	0.08057	#ERROR!
RIN1	THAP9	-0.02665	0.87738	-0.67783	0.044809	-1.74737	0.080573	0/-
LOC100420930	THAP9	0.118383	0.49167	0.724569	0.027239	1.74699	0.080639	0/+
COX5B	THAP9	-0.1299	0.450187	0.583333	0.099186	1.74673	0.080684	0/0
PDZRN3	THAP9	0.39136	0.01826	-0.36667	0.33174	-1.74636	0.080748	#ERROR!
LINC01479	THAP9	0.221154	0.194902	-0.51755	0.153564	-1.74611	0.080792	0/0
MED8	THAP9	-0.05047	0.770057	0.633333	0.067086	1.74527	0.080938	0/0
MFSD10	THAP9	0.129128	0.452909	-0.58333	0.099186	-1.74501	0.080983	0/0
IDUA	THAP9	0.199678	0.242972	-0.53333	0.139227	-1.74465	0.081045	0/0
MRPL33	THAP9	-0.10364	0.547507	0.6	0.087623	1.74458	0.081058	0/0
MPPED2-AS1	THAP9	0.345653	0.038937	-0.41079	0.272071	-1.74437	0.081094	#ERROR!
LNX1-AS1	THAP9	0.527702	0.000941	-0.20702	0.593036	-1.74426	0.081113	#ERROR!
OR7A19P	THAP9	0.131924	0.443101	0.730297	0.025464	1.74351	0.081245	0/+
COX5A	THAP9	-0.04957	0.774056	0.633333	0.067086	1.74329	0.081282	0/0
RFC2	THAP9	-0.24203	0.154968	0.5	0.170471	1.74257	0.081408	0/0
LAMA2	THAP9	0.356228	0.03297	-0.4	0.286105	-1.7425	0.08142	#ERROR!
ETS1-AS1	THAP9	0.179099	0.295953	-0.54772	0.12687	-1.74243	0.081433	0/0
MCOLN3	THAP9	0.013647	0.937038	0.669462	0.048568	1.74231	0.081454	0/+
FBXO41	THAP9	0.405793	0.014068	-0.35	0.35582	-1.74207	0.081496	#ERROR!
LOC101927164	THAP9	0.296256	0.079357	-0.45467	0.218844	-1.74202	0.081505	0/0
DNAJC8	THAP9	0.104416	0.544484	0.716667	0.029818	1.74196	0.081515	0/+
RNU2-71P	THAP9	0.178735	0.296952	-0.54772	0.12687	-1.74161	0.081577	0/0
COL5A1	THAP9	0.355584	0.033311	-0.4	0.286105	-1.74089	0.081703	#ERROR!
GNAI3	THAP9	0.009269	0.95721	0.666667	0.049867	1.74084	0.081711	0/+
PLEKHG2	THAP9	0.355327	0.033448	-0.4	0.286105	-1.74025	0.081816	#ERROR!
PACRG-AS3	THAP9	0.383579	0.020923	0.833459	0.005252	1.7401	0.081841	#ERROR!
CSNK1G1	THAP9	0.481107	0.002974	0.866667	0.002495	1.74009	0.081843	#ERROR!
EML2	THAP9	0.679627	5.16e-06	0.033333	0.932157	-1.74002	0.081855	#ERROR!
MTND5P2	THAP9	0.178023	0.298912	-0.54772	0.12687	-1.74	0.081859	0/0
CCDC102A	THAP9	0.151143	0.378902	-0.56667	0.111633	-1.73966	0.081919	0/0
LOC388242	THAP9	0.343563	0.040214	-0.41079	0.272071	-1.73918	0.082003	#ERROR!
MYO16	THAP9	0.140373	0.414173	0.733333	0.024554	1.73897	0.082039	0/+
CRHR1	THAP9	0.177536	0.300258	-0.54772	0.12687	-1.7389	0.082053	0/0
ATF5	THAP9	-0.33717	0.044329	0.416667	0.264586	1.73888	0.082056	-/0
GPS1	THAP9	-0.17432	0.30925	0.55	0.124977	1.73876	0.082077	0/0
GPRIN3	THAP9	0.477631	0.00322	-0.26778	0.48603	-1.73852	0.082119	#ERROR!
CTF2P	THAP9	0.34324	0.040414	-0.41079	0.272071	-1.73838	0.082144	#ERROR!
KSR1	THAP9	0.354577	0.033849	-0.4	0.286105	-1.73837	0.082146	#ERROR!
CORIN	THAP9	0.572385	0.000265	-0.14226	0.715032	-1.73832	0.082155	#ERROR!
GCSAM	THAP9	0.291103	0.084978	-0.45769	0.215412	-1.73802	0.082207	0/0
KIF20A	THAP9	0.125917	0.464314	-0.58333	0.099186	-1.73787	0.082234	0/0
DYNC2LI1	THAP9	-0.10055	0.559574	0.6	0.087623	1.73775	0.082255	0/0
PELI2	THAP9	0.449852	0.00591	-0.3	0.432845	-1.73775	0.082255	#ERROR!
POP5	THAP9	-0.15024	0.381784	0.566667	0.111633	1.73764	0.082274	0/0
PEAR1	THAP9	0.31827	0.058525	-0.43333	0.243952	-1.73705	0.082379	0/0
NFASC	THAP9	0.280013	0.098115	-0.46667	0.205386	-1.73657	0.082463	0/0
PPM1N	THAP9	0.364257	0.028958	-0.38989	0.299589	-1.73647	0.082481	#ERROR!
ARHGDIB	THAP9	0.173286	0.312162	-0.55	0.124977	-1.73643	0.082487	0/0
GLB1L	THAP9	0.317605	0.059082	-0.43333	0.243952	-1.73543	0.082665	0/0
RN7SL530P	THAP9	0.123751	0.472095	0.724569	0.027239	1.73507	0.082729	0/+
EPHA8	THAP9	0.175836	0.304985	-0.54772	0.12687	-1.73506	0.082731	0/0
AK3P3	THAP9	0.549317	0.000521	-0.17345	0.655398	-1.73465	0.082802	#ERROR!
C8orf58	THAP9	0.238445	0.161372	-0.5	0.170471	-1.73424	0.082876	0/0
LOC103344931	THAP9	0.351101	0.035762	-0.40168	0.2839	-1.73405	0.082909	#ERROR!
ACADL	THAP9	0.043002	0.803342	0.683333	0.042442	1.73398	0.082922	0/+
KIF21B	THAP9	0.333054	0.047158	-0.41841	0.262381	-1.73336	0.083033	#ERROR!
LOC100422614	THAP9	0.470706	0.003764	-0.27386	0.475797	-1.73332	0.083039	#ERROR!
ARHGEF2	THAP9	0.358931	0.031571	-0.39331	0.29499	-1.73191	0.08329	#ERROR!
PABPC5-AS1	THAP9	0.393526	0.017571	-0.35857	0.343337	-1.73156	0.083352	#ERROR!
LEF1	THAP9	0.144062	0.40189	-0.56904	0.109804	-1.73149	0.083364	0/0
LCN1P1	THAP9	0.340343	0.042247	-0.41079	0.272071	-1.7312	0.083415	#ERROR!
CREB3L1	THAP9	0.467976	0.003999	-0.27615	0.471962	-1.73108	0.083438	#ERROR!
PNCK	THAP9	0.130337	0.448653	-0.57801	0.103068	-1.73011	0.08361	0/0
COL1A1	THAP9	0.367943	0.027255	-0.38333	0.308495	-1.72893	0.083822	#ERROR!
ASIC2	THAP9	-0.23176	0.173811	-0.77232	0.014721	-1.72891	0.083825	0/-
FMNL1	THAP9	0.314902	0.061395	-0.43333	0.243952	-1.72885	0.083835	0/0
HDAC7	THAP9	0.296106	0.079517	-0.45	0.224216	-1.7288	0.083845	0/0
RMI2	THAP9	0.446433	0.006347	-0.3	0.432845	-1.72838	0.083919	#ERROR!
PDLIM1P4	THAP9	-0.0193	0.911024	0.647082	0.059592	1.72797	0.083993	0/0
LINC00316	THAP9	0.338937	0.043161	-0.41079	0.272071	-1.72772	0.084038	#ERROR!
GTF2F2	THAP9	0.145607	0.396807	0.733333	0.024554	1.72728	0.084117	0/+
EHHADH	THAP9	0.145616	0.396777	0.733333	0.024554	1.72726	0.084121	0/+
CNTNAP1	THAP9	0.445947	0.006412	-0.3	0.432845	-1.72706	0.084158	#ERROR!
ADPRS	THAP9	-0.23521	0.167303	0.5	0.170471	1.72674	0.084214	0/0
COLEC11	THAP9	0.168802	0.32504	-0.55	0.124977	-1.72632	0.084289	0/0
LYRM4	THAP9	-0.12064	0.483395	0.583333	0.099186	1.72614	0.084323	0/0
PCDH17	THAP9	0.234696	0.168262	-0.5	0.170471	-1.72555	0.084429	0/0
ACY3	THAP9	-0.09502	0.581473	0.6	0.087623	1.72553	0.084432	0/0
DGCR6L	THAP9	-0.1684	0.326196	0.55	0.124977	1.72543	0.08445	0/0
ABTB1	THAP9	0.313099	0.062977	-0.43333	0.243952	-1.72448	0.084621	0/0
NIBAN1	THAP9	0.254667	0.133895	-0.48333	0.18747	-1.72393	0.08472	0/0
DCN	THAP9	0.382491	0.021319	-0.36667	0.33174	-1.72354	0.084792	#ERROR!
PRKACB	THAP9	-0.03965	0.818396	0.633333	0.067086	1.72155	0.08515	0/0
CPLX1	THAP9	0.166356	0.332203	-0.55	0.124977	-1.72082	0.085284	0/0
RGS12	THAP9	0.311555	0.064358	-0.43333	0.243952	-1.72073	0.085299	0/0
HIF3A	THAP9	0.273225	0.106888	-0.46667	0.205386	-1.72048	0.085345	0/0
LOC105379252	THAP9	-0.16934	0.323465	0.547723	0.12687	1.72041	0.085357	0/0
LINC01013	THAP9	0.226143	0.184763	-0.50498	0.165574	-1.72035	0.08537	0/0
LINC02037	THAP9	-0.13896	0.418944	0.569043	0.109804	1.7201	0.085415	0/0
LINC01451	THAP9	0.302913	0.072527	-0.44074	0.235069	-1.71989	0.085453	0/0
PPIAP93	THAP9	0.335701	0.045325	-0.41079	0.272071	-1.71973	0.085481	#ERROR!
FAM53A	THAP9	0.363917	0.029119	-0.38333	0.308495	-1.71875	0.085659	#ERROR!
LINC01119	THAP9	0.346692	0.038314	-0.4	0.286105	-1.71869	0.08567	#ERROR!
POTEF	THAP9	0.082123	0.633965	-0.60622	0.083533	-1.71847	0.08571	0/0
RFPL3	THAP9	0.350647	0.036018	-0.39606	0.291321	-1.7183	0.085742	#ERROR!
KRT18P24	THAP9	-0.16838	0.326256	0.547723	0.12687	1.71825	0.085751	0/0
CNN1	THAP9	0.363695	0.029225	-0.38333	0.308495	-1.71819	0.085762	#ERROR!
LOXL4	THAP9	0.412359	0.012449	-0.33333	0.380713	-1.71803	0.085791	#ERROR!
PTK7	THAP9	0.298938	0.076548	-0.44352	0.231784	-1.71788	0.085819	0/0
C4orf19	THAP9	0.082529	0.632284	0.7	0.03577	1.71707	0.085967	0/+
PSMC1P1	THAP9	0.242564	0.154039	0.774643	0.014236	1.71653	0.086065	0/+
NKAIN4	THAP9	0.136825	0.426189	-0.5693	0.109604	-1.71618	0.086128	0/0
MTIF2P1	THAP9	0.097325	0.57229	0.707317	0.03307	1.71614	0.086137	0/+
FGF10	THAP9	0.251552	0.138883	-0.48305	0.187771	-1.71583	0.086194	0/0
NPFFR1	THAP9	-0.0283	0.869873	-0.67082	0.047945	-1.71563	0.086229	0/-
CAMTA2	THAP9	0.510718	0.001459	-0.21667	0.575515	-1.71547	0.086259	#ERROR!
PRPF18	THAP9	0.65495	1.46e-05	0.916667	0.000507	1.71541	0.08627	#ERROR!
HOXA6	THAP9	0.333852	0.046599	-0.41079	0.272071	-1.71518	0.086313	#ERROR!
PRSS46P	THAP9	0.412025	0.012527	-0.33226	0.382342	-1.71451	0.086436	#ERROR!
KCNJ9	THAP9	0.337267	0.044267	-0.40724	0.276655	-1.71425	0.086483	#ERROR!
RASSF10-DT	THAP9	0.133154	0.438821	0.724569	0.027239	1.71414	0.086503	0/+
RN7SL724P	THAP9	0.336008	0.045115	-0.40837	0.275189	-1.71412	0.086506	#ERROR!
IGFBP6	THAP9	0.06347	0.71306	-0.61667	0.076929	-1.71396	0.086537	0/0
PAQR4	THAP9	0.315308	0.061043	-0.42678	0.251957	-1.71225	0.08685	0/0
PCBP4	THAP9	0.138783	0.419534	-0.56667	0.111633	-1.71203	0.086891	0/0
JAK3	THAP9	0.207403	0.224843	-0.51667	0.15439	-1.71193	0.08691	0/0
NRARP	THAP9	0.394078	0.017399	-0.35	0.35582	-1.71155	0.08698	#ERROR!
KIAA1191	THAP9	0.306534	0.069011	0.8	0.009628	1.71118	0.087047	0/+
LOC102723692	THAP9	0.246878	0.146621	-0.48522	0.185503	-1.71113	0.087058	0/0
PSMC1P4	THAP9	-0.16519	0.335658	0.547723	0.12687	1.71105	0.087071	0/0
IK	THAP9	0.226456	0.18414	0.766667	0.015944	1.71084	0.087111	0/+
ERI3	THAP9	-0.08819	0.609011	0.6	0.087623	1.71047	0.087179	0/0
PATE2	THAP9	-0.20554	0.229133	0.517549	0.153564	1.7103	0.08721	0/0
CSAG1	THAP9	-0.20491	0.23059	0.517549	0.153564	1.70887	0.087475	0/0
DUS1L	THAP9	-0.206	0.228065	0.516667	0.15439	1.70872	0.087502	0/0
AGT	THAP9	0.023946	0.889747	0.666667	0.049867	1.70871	0.087504	0/+
GPR20	THAP9	0.421653	0.010428	-0.31934	0.402227	-1.70837	0.087567	#ERROR!
LTA4H	THAP9	0.154104	0.369523	0.733333	0.024554	1.70826	0.087588	0/+
METTL22	THAP9	0.190164	0.266616	0.75	0.019942	1.70801	0.087634	0/+
MEOX2	THAP9	0.30627	0.069263	-0.43333	0.243952	-1.70795	0.087646	0/0
C1QL2	THAP9	0.220195	0.196895	-0.5054	0.165164	-1.70788	0.087659	0/0
MMP2	THAP9	0.342324	0.040987	-0.4	0.286105	-1.70785	0.087665	#ERROR!
RNU6-1005P	THAP9	0.377788	0.023107	-0.36515	0.333899	-1.70767	0.087698	#ERROR!
MICU1	THAP9	0.228001	0.181085	0.766667	0.015944	1.70728	0.087771	0/+
GM2A	THAP9	0.055234	0.749006	0.683333	0.042442	1.70714	0.087795	0/+
EPHX2	THAP9	-0.13634	0.427855	0.566667	0.111633	1.70657	0.087901	0/0
NBPF25P	THAP9	0.422202	0.010318	-0.31799	0.404323	-1.70656	0.087904	#ERROR!
ANKRD22	THAP9	0.042233	0.806795	-0.62762	0.070365	-1.70646	0.087922	0/0
CYP27A1	THAP9	-0.0327	0.849826	0.633333	0.067086	1.70633	0.087947	0/0
ACBD7	THAP9	0.453907	0.005425	-0.28214	0.461998	-1.7062	0.08797	#ERROR!
RN7SKP177	THAP9	-0.16277	0.34289	0.547723	0.12687	1.70561	0.088081	0/0
PROZ	THAP9	-0.08593	0.618284	0.6	0.087623	1.70547	0.088107	0/0
NADK2	THAP9	-0.03206	0.852759	0.633333	0.067086	1.70491	0.088211	0/0
NDUFS3	THAP9	-0.13552	0.430663	0.566667	0.111633	1.70475	0.088241	0/0
KLF15	THAP9	0.056775	0.742236	0.683333	0.042442	1.70376	0.088426	0/+
DDIT4L	THAP9	0.311747	0.064184	-0.42678	0.251957	-1.70361	0.088454	0/0
ATAD3A	THAP9	-0.18154	0.289318	0.533333	0.139227	1.70345	0.088483	0/0
GTF2A1L	THAP9	-0.16166	0.346222	0.547723	0.12687	1.70312	0.088545	0/0
CACNA1S	THAP9	0.165969	0.333343	-0.54458	0.12951	-1.70301	0.088565	0/0
CLN5	THAP9	0.26907	0.112543	0.783333	0.01252	1.70283	0.0886	0/+
CRISP1	THAP9	0.103157	0.549373	0.707177	0.03312	1.70263	0.088637	0/+
[truncated: 15,711 more rows]

## Sheet: COAD
Gene1	Gene2	TCGA_COAD.PrimarySolidTumor_cor	TCGA_COAD.PrimarySolidTumor_pVal	TCGA_COAD.SolidTissueNormal_cor	TCGA_COAD.SolidTissueNormal_pVal	zScoreDiff	pValDiff	Classes
[truncated: 24,775 more rows]

[truncated: 15 more sheets: ESCA, GBM, HNSC, KICH, KIRC, KIRP, LIHC, LUAD, LUSC, PAAD, PRAD, READ, STAD, THCA, UCEC]
