# Supplementary material for: Pan-Cancer Analysis Reveals the Prognostic Potential of the THAP9/THAP9-AS1 Sense–Antisense Gene Pair in Human Cancers
Source: Noncoding RNA. 2022 Jul 8;8(4):51. doi: 10.3390/ncrna8040051 (PMC9326536; doi:10.3390/ncrna8040051)
Supplement: Supplementary file 1 [file ncrna-08-00051-s001.zip › Supplementary Table S10_2.xlsx]

## Sheet: READ
Gene1	Gene2	TCGA_READ.PrimarySolidTumor_cor	TCGA_READ.PrimarySolidTumor_pVal	TCGA_READ.SolidTissueNormal_cor	TCGA_READ.SolidTissueNormal_pVal	zScoreDiff	pValDiff	Classes
MTCO2P2	THAP9	0.639381	0	-0.91794	0.00018	-5.87029	4.35e-09	#ERROR!
LINC01123	THAP9	0.756742	0	-0.8303	0.00294	-5.47968	4.26e-08	#ERROR!
RPL5P5	THAP9	-0.37797	5.16e-07	0.922179	0.000146	5.03536	4.77e-07	-/+
LOC286178	THAP9	0.186444	0.016166	0.972423	2.45e-06	4.89767	9.7e-07	#ERROR!
MYCBP2-AS1	THAP9	0.588001	0	-0.8426	0.002211	-4.79277	1.64e-06	#ERROR!
RPL31P19	THAP9	-0.57878	4.44e-16	0.839807	0.002363	4.73358	2.21e-06	-/+
PHLPP2	THAP9	0.723232	0	-0.73333	0.015801	-4.65591	3.23e-06	#ERROR!
ACOX1	THAP9	0.768091	0	-0.67273	0.033041	-4.60829	4.06e-06	#ERROR!
RPL3P9	THAP9	-0.2105	0.006485	0.924016	0.000133	4.60365	4.15e-06	-/+
LCOR	THAP9	0.805591	0	-0.61212	0.059972	-4.59642	4.3e-06	#ERROR!
ASPM	THAP9	0.723273	0	-0.72121	0.018573	-4.59138	4.4e-06	#ERROR!
ENPP1	THAP9	0.658331	0	-0.7697	0.009222	-4.55314	5.29e-06	#ERROR!
GRIN2B	THAP9	0.59751	0	-0.80606	0.004862	-4.54181	5.58e-06	#ERROR!
KIF14	THAP9	0.710679	0	-0.72121	0.018573	-4.52616	6.01e-06	#ERROR!
ARHGAP11A	THAP9	0.712513	0	-0.70909	0.021666	-4.47306	7.71e-06	#ERROR!
CCDC186	THAP9	0.799266	0	-0.58788	0.073878	-4.45638	8.34e-06	#ERROR!
PAG1	THAP9	0.708863	0	-0.70909	0.021666	-4.45451	8.41e-06	#ERROR!
PRDX6	THAP9	0.773987	0	-0.62424	0.053718	-4.43406	9.25e-06	#ERROR!
CEACAM5	THAP9	0.646987	0	-0.75758	0.011143	-4.43023	9.41e-06	#ERROR!
PLK4	THAP9	0.801673	0	-0.57576	0.081553	-4.42713	9.55e-06	#ERROR!
DYRK2	THAP9	0.780185	0	-0.61212	0.059972	-4.42406	9.69e-06	#ERROR!
RPL23P6	THAP9	-0.17976	0.02048	0.917937	0.00018	4.42241	9.76e-06	-/+
MIR573	THAP9	0.646958	0	-0.75611	0.011393	-4.42148	9.8e-06	#ERROR!
FAM126B	THAP9	0.769451	0	-0.62424	0.053718	-4.40584	1.05e-05	#ERROR!
CDH1	THAP9	0.76095	0	-0.63636	0.047912	-4.40483	1.06e-05	#ERROR!
BLOC1S5-TXNDC5	THAP9	0.66798	0	-0.73557	0.015323	-4.39811	1.09e-05	#ERROR!
CXADR	THAP9	0.787638	0	-0.58788	0.073878	-4.37738	1.2e-05	#ERROR!
PRKG2	THAP9	0.703131	0	-0.69697	0.025097	-4.36543	1.27e-05	#ERROR!
MACIR	THAP9	0.744237	0	-0.64848	0.04254	-4.35974	1.3e-05	#ERROR!
BUB1	THAP9	0.723436	0	-0.67273	0.033041	-4.35455	1.33e-05	#ERROR!
RN7SL333P	THAP9	0.554626	8.88e-15	-0.80091	0.005364	-4.34362	1.4e-05	#ERROR!
CCDC18	THAP9	0.788262	0	-0.57576	0.081553	-4.33541	1.45e-05	#ERROR!
KIF11	THAP9	0.752	0	-0.63222	0.049846	-4.33474	1.46e-05	#ERROR!
LY75	THAP9	0.762636	0	-0.61212	0.059972	-4.31496	1.6e-05	#ERROR!
DEPDC7	THAP9	0.712398	0	-0.67273	0.033041	-4.29723	1.73e-05	#ERROR!
ABCG2	THAP9	0.476471	8.65e-11	-0.8303	0.00294	-4.29666	1.73e-05	#ERROR!
ATP1A1	THAP9	0.667434	0	-0.70909	0.021666	-4.25623	2.08e-05	#ERROR!
CENPF	THAP9	0.722948	0	-0.64848	0.04254	-4.2437	2.2e-05	#ERROR!
CENPE	THAP9	0.800478	0	-0.52727	0.117308	-4.24327	2.2e-05	#ERROR!
RNF152	THAP9	0.556236	7.11e-15	-0.78182	0.007547	-4.22086	2.43e-05	#ERROR!
LRRC8D	THAP9	0.821907	0	-0.46667	0.173939	-4.19839	2.69e-05	#ERROR!
RETSAT	THAP9	0.731691	0	-0.62424	0.053718	-4.18787	2.82e-05	#ERROR!
GRAMD2B	THAP9	0.804309	0	-0.50303	0.138334	-4.18729	2.82e-05	#ERROR!
MIR3671	THAP9	0.588363	0	-0.75525	0.011541	-4.17768	2.94e-05	#ERROR!
PTPRJ	THAP9	0.728965	0	-0.62424	0.053718	-4.17317	3e-05	#ERROR!
LRRC1	THAP9	0.760207	0	-0.57576	0.081553	-4.15897	3.2e-05	#ERROR!
RPL34P4	THAP9	0.350425	3.68e-06	-0.85817	0.001486	-4.1577	3.21e-05	#ERROR!
ERCC6L	THAP9	0.723053	0	-0.62424	0.053718	-4.1417	3.45e-05	#ERROR!
MXI1	THAP9	0.81939	0	-0.45455	0.186905	-4.14028	3.47e-05	#ERROR!
LINC00624	THAP9	0.612373	0	-0.73082	0.01635	-4.13481	3.55e-05	#ERROR!
KIF23	THAP9	0.728946	0	-0.61212	0.059972	-4.12369	3.73e-05	#ERROR!
APPL2	THAP9	0.775012	0	-0.53939	0.107593	-4.11684	3.84e-05	#ERROR!
CCDC168	THAP9	0.45964	4.68e-10	-0.81362	0.004188	-4.11293	3.91e-05	#ERROR!
ABCD3	THAP9	0.813936	0	-0.45455	0.186905	-4.09907	4.15e-05	#ERROR!
CCDC68	THAP9	0.655327	0	-0.68485	0.028883	-4.0834	4.44e-05	#ERROR!
FLVCR2	THAP9	0.554883	8.66e-15	-0.75758	0.011143	-4.06614	4.78e-05	#ERROR!
ING2	THAP9	0.818635	0	-0.4303	0.214492	-4.05865	4.94e-05	#ERROR!
DSG2-AS1	THAP9	0.688067	0	-0.64438	0.044312	-4.05103	5.1e-05	#ERROR!
MAN2A1	THAP9	0.790173	0	-0.49091	0.149656	-4.04913	5.14e-05	#ERROR!
RIOK3	THAP9	0.75559	0	-0.55152	0.098401	-4.04224	5.29e-05	#ERROR!
RPL8P3	THAP9	-0.62175	0	0.70517	0.022738	4.0396	5.35e-05	-/+
ARAP2	THAP9	0.82797	0	-0.39394	0.259998	-4.02133	5.79e-05	#ERROR!
NCAPG	THAP9	0.77921	0	-0.50303	0.138334	-4.01783	5.87e-05	#ERROR!
BCLAF3	THAP9	0.818058	0	-0.41818	0.229113	-4.01706	5.89e-05	#ERROR!
AP1AR	THAP9	0.901	0	-0.11515	0.75142	-4.00893	6.1e-05	#ERROR!
DNAH7	THAP9	0.727941	0	-0.57928	0.079272	-3.99015	6.6e-05	#ERROR!
KRTAP5-2	THAP9	0.306289	5.99e-05	-0.8528	0.001713	-3.98279	6.81e-05	#ERROR!
GDA	THAP9	0.598946	0	-0.70909	0.021666	-3.96787	7.25e-05	#ERROR!
CCNG2	THAP9	0.83405	0	-0.35758	0.310376	-3.96421	7.36e-05	#ERROR!
ACER2	THAP9	0.563503	2.66e-15	-0.73333	0.015801	-3.96031	7.49e-05	#ERROR!
RPL10AP12	THAP9	-0.61101	0	0.69765	0.024895	3.95876	7.53e-05	-/+
GTSE1	THAP9	0.686364	0	-0.62424	0.053718	-3.9581	7.55e-05	#ERROR!
CKAP2L	THAP9	0.761953	0	-0.51515	0.127553	-3.95206	7.75e-05	#ERROR!
BROX	THAP9	0.754698	0	-0.52727	0.117308	-3.95097	7.78e-05	#ERROR!
PLOD2	THAP9	0.768079	0	-0.50303	0.138334	-3.94805	7.88e-05	#ERROR!
MKI67	THAP9	0.66155	0	-0.64848	0.04254	-3.9462	7.94e-05	#ERROR!
NBPF1	THAP9	0.760662	0	-0.51515	0.127553	-3.94433	8e-05	#ERROR!
ERBIN	THAP9	0.791925	0	-0.45455	0.186905	-3.94304	8.05e-05	#ERROR!
PLS1	THAP9	0.74488	0	-0.53939	0.107593	-3.93717	8.24e-05	#ERROR!
RPL27P4	THAP9	-0.64194	0	0.664694	0.03601	3.93212	8.42e-05	-/+
MTCO2P22	THAP9	0.508257	2.74e-12	-0.75988	0.010758	-3.91618	9e-05	#ERROR!
MFSD9	THAP9	0.755131	0	-0.51515	0.127553	-3.91163	9.17e-05	#ERROR!
AAK1	THAP9	0.740006	0	-0.53939	0.107593	-3.90983	9.24e-05	#ERROR!
CDCA2	THAP9	0.627261	0	-0.67273	0.033041	-3.90682	9.35e-05	#ERROR!
BUB1B	THAP9	0.722732	0	-0.56364	0.089724	-3.90404	9.46e-05	#ERROR!
ABHD6	THAP9	0.745926	0	-0.52727	0.117308	-3.90046	9.6e-05	#ERROR!
KNL1	THAP9	0.692249	0	-0.6	0.066688	-3.88874	0.000101	#ERROR!
LOC100419515	THAP9	0.726484	0	-0.55391	0.096645	-3.88834	0.000101	#ERROR!
PDP2	THAP9	0.788903	0	-0.44242	0.200423	-3.8846	0.000103	#ERROR!
ALDH18A1	THAP9	0.787103	0	-0.44242	0.200423	-3.87264	0.000108	#ERROR!
RPL11P3	THAP9	-0.54679	2.51e-14	0.727705	0.017049	3.86915	0.000109	-/+
PDZK1	THAP9	0.588096	0	-0.69697	0.025097	-3.8654	0.000111	#ERROR!
ENDOD1	THAP9	0.753808	0	-0.50303	0.138334	-3.86272	0.000112	#ERROR!
FEM1C	THAP9	0.773135	0	-0.46667	0.173939	-3.85972	0.000114	#ERROR!
RBM47	THAP9	0.751125	0	-0.50303	0.138334	-3.84716	0.000119	#ERROR!
CCDC150	THAP9	0.678248	0	-0.60367	0.064605	-3.83679	0.000125	#ERROR!
CAB39	THAP9	0.77521	0	-0.45455	0.186905	-3.83403	0.000126	#ERROR!
RPL26P32	THAP9	-0.43678	4.02e-09	0.781631	0.007571	3.81926	0.000134	-/+
GEN1	THAP9	0.789	0	-0.41818	0.229113	-3.81037	0.000139	#ERROR!
CD2AP	THAP9	0.788098	0	-0.41818	0.229113	-3.80437	0.000142	#ERROR!
RNY1P16	THAP9	0.628564	0	-0.64823	0.042649	-3.80286	0.000143	#ERROR!
GPD2	THAP9	0.757099	0	-0.47879	0.161523	-3.80164	0.000144	#ERROR!
KIF20B	THAP9	0.763329	0	-0.46667	0.173939	-3.7995	0.000145	#ERROR!
NDC80	THAP9	0.717646	0	-0.53939	0.107593	-3.78976	0.000151	#ERROR!
IGFBP7-AS1	THAP9	-0.55867	5.33e-15	0.703824	0.023114	3.78892	0.000151	-/+
MPZL3	THAP9	0.791116	0	-0.40606	0.244282	-3.7878	0.000152	#ERROR!
PLPP6	THAP9	0.724975	0	-0.52727	0.117308	-3.78558	0.000153	#ERROR!
RNY4P19	THAP9	0.468656	1.92e-10	-0.75939	0.01084	-3.78232	0.000155	#ERROR!
PDE7A	THAP9	0.790252	0	-0.40606	0.244282	-3.78199	0.000156	#ERROR!
RNF103	THAP9	0.795287	0	-0.39394	0.259998	-3.77979	0.000157	#ERROR!
LRRC75A	THAP9	0.668622	0	-0.6	0.066688	-3.77798	0.000158	#ERROR!
MFSD4B	THAP9	0.738493	0	-0.50303	0.138334	-3.77576	0.00016	#ERROR!
CDC14A	THAP9	0.765289	0	-0.45455	0.186905	-3.77264	0.000162	#ERROR!
INO80D	THAP9	0.771037	0	-0.44242	0.200423	-3.76975	0.000163	#ERROR!
B3GNT4	THAP9	0.299333	8.94e-05	-0.8303	0.00294	-3.76919	0.000164	#ERROR!
MAL2	THAP9	0.79343	0	-0.39394	0.259998	-3.76712	0.000165	#ERROR!
ROCK2	THAP9	0.798635	0	-0.38182	0.276255	-3.76697	0.000165	#ERROR!
RALGPS2	THAP9	0.786349	0	-0.40606	0.244282	-3.75605	0.000173	#ERROR!
ARHGAP42	THAP9	0.791676	0	-0.39394	0.259998	-3.75525	0.000173	#ERROR!
ATAD5	THAP9	0.785945	0	-0.40606	0.244282	-3.75339	0.000174	#ERROR!
OSBPL3	THAP9	0.784757	0	-0.40606	0.244282	-3.74559	0.00018	#ERROR!
AHSG	THAP9	0.24127	0.001739	-0.84614	0.002028	-3.74558	0.00018	#ERROR!
ACE2	THAP9	0.354685	2.75e-06	-0.80606	0.004862	-3.74043	0.000184	#ERROR!
RPL27P11	THAP9	-0.57233	8.88e-16	0.683158	0.02944	3.73924	0.000185	-/+
DIAPH3	THAP9	0.698643	0	-0.55152	0.098401	-3.73724	0.000186	#ERROR!
KIF4A	THAP9	0.77697	0	-0.41818	0.229113	-3.73212	0.00019	#ERROR!
LEMD3	THAP9	0.82594	0	-0.29697	0.404702	-3.72772	0.000193	#ERROR!
DONSON	THAP9	0.770016	0	-0.4303	0.214492	-3.72575	0.000195	#ERROR!
PGAM1P11	THAP9	0.200351	0.00965	-0.85534	0.001603	-3.72115	0.000198	#ERROR!
C12orf75	THAP9	0.712103	0	-0.52727	0.117308	-3.71861	0.0002	#ERROR!
DPP4	THAP9	0.494222	1.32e-11	-0.73333	0.015801	-3.71794	0.000201	#ERROR!
KALRN	THAP9	0.727589	0	-0.50303	0.138334	-3.71645	0.000202	#ERROR!
LOC100289518	THAP9	0.646061	0	-0.60791	0.062255	-3.7093	0.000208	#ERROR!
HNRNPUL2	THAP9	0.773262	0	-0.41818	0.229113	-3.70874	0.000208	#ERROR!
HJURP	THAP9	0.69258	0	-0.55152	0.098401	-3.70768	0.000209	#ERROR!
PEX26	THAP9	0.739922	0	-0.47879	0.161523	-3.70331	0.000213	#ERROR!
LRIF1	THAP9	0.809054	0	-0.33333	0.346594	-3.70114	0.000215	#ERROR!
HMGCS1	THAP9	0.746365	0	-0.46667	0.173939	-3.70024	0.000215	#ERROR!
LINC00294	THAP9	0.782655	0	-0.39394	0.259998	-3.69557	0.000219	#ERROR!
PDCD6IP	THAP9	0.771027	0	-0.41818	0.229113	-3.69481	0.00022	#ERROR!
FAT1	THAP9	0.738368	0	-0.47879	0.161523	-3.69469	0.00022	#ERROR!
ABHD17C	THAP9	0.744897	0	-0.46667	0.173939	-3.69192	0.000223	#ERROR!
FSIP2	THAP9	0.586975	0	-0.66061	0.037588	-3.69125	0.000223	#ERROR!
PTBP3	THAP9	0.792615	0	-0.3697	0.29305	-3.69018	0.000224	#ERROR!
CGN	THAP9	0.667744	0	-0.57576	0.081553	-3.68076	0.000233	#ERROR!
ANKRD20A1	THAP9	0.457192	5.94e-10	-0.74704	0.013028	-3.67378	0.000239	#ERROR!
ARL4A	THAP9	0.755351	0	-0.43769	0.20585	-3.66041	0.000252	#ERROR!
BRCA1	THAP9	0.751977	0	-0.44242	0.200423	-3.65553	0.000257	#ERROR!
CA12	THAP9	0.4739	1.13e-10	-0.73333	0.015801	-3.65115	0.000261	#ERROR!
FNIP2	THAP9	0.796968	0	-0.34545	0.328227	-3.64996	0.000262	#ERROR!
EXOC8	THAP9	0.757381	0	-0.4303	0.214492	-3.64944	0.000263	#ERROR!
DTX3L	THAP9	0.737128	0	-0.46667	0.173939	-3.64856	0.000264	#ERROR!
ASB7	THAP9	0.810912	0	-0.30909	0.384841	-3.64671	0.000266	#ERROR!
P4HA2	THAP9	0.729566	0	-0.47879	0.161523	-3.64667	0.000266	#ERROR!
HSD17B12	THAP9	0.806129	0	-0.32121	0.365468	-3.64582	0.000267	#ERROR!
GAR1	THAP9	0.835767	0	-0.23636	0.510885	-3.64334	0.000269	#ERROR!
FKBP5	THAP9	0.762497	0	-0.41818	0.229113	-3.64272	0.00027	#ERROR!
EZH2	THAP9	0.713321	0	-0.50303	0.138334	-3.64179	0.000271	#ERROR!
CTNND1	THAP9	0.795404	0	-0.34545	0.328227	-3.63921	0.000273	#ERROR!
GPD1L	THAP9	0.761063	0	-0.41818	0.229113	-3.63412	0.000279	#ERROR!
RAB22A	THAP9	0.789247	0	-0.35758	0.310376	-3.63239	0.000281	#ERROR!
CDS1	THAP9	0.845406	0	-0.2	0.579584	-3.62994	0.000283	#ERROR!
MYO6	THAP9	0.78342	0	-0.3697	0.29305	-3.62912	0.000284	#ERROR!
MSMO1	THAP9	0.808462	0	-0.30909	0.384841	-3.62882	0.000285	#ERROR!
B4GALT4	THAP9	0.783002	0	-0.3697	0.29305	-3.6264	0.000287	#ERROR!
PSD3	THAP9	0.693528	0	-0.52727	0.117308	-3.62622	0.000288	#ERROR!
MIER3	THAP9	0.77111	0	-0.39394	0.259998	-3.62227	0.000292	#ERROR!
EPCAM	THAP9	0.797547	0	-0.33333	0.346594	-3.6195	0.000295	#ERROR!
KIAA1671	THAP9	0.716238	0	-0.49091	0.149656	-3.61629	0.000299	#ERROR!
ACAP2	THAP9	0.801802	0	-0.32121	0.365468	-3.61503	0.0003	#ERROR!
GLS	THAP9	0.806338	0	-0.30909	0.384841	-3.61346	0.000302	#ERROR!
FAM72A	THAP9	0.747891	0	-0.43562	0.208258	-3.61081	0.000305	#ERROR!
PTPN3	THAP9	0.768789	0	-0.39394	0.259998	-3.60793	0.000309	#ERROR!
RPL21P65	THAP9	-0.00268	0.972657	0.891889	0.000524	3.60781	0.000309	0/+
KDM1B	THAP9	0.729401	0	-0.46667	0.173939	-3.6065	0.00031	#ERROR!
MIR559	THAP9	0.605529	0	-0.62388	0.053898	-3.60629	0.000311	#ERROR!
MYO5B	THAP9	0.729186	0	-0.46667	0.173939	-3.60535	0.000312	#ERROR!
KIF15	THAP9	0.756034	0	-0.41818	0.229113	-3.60432	0.000313	#ERROR!
POU5F1	THAP9	0.668654	0	-0.55152	0.098401	-3.59547	0.000324	#ERROR!
GALNT7	THAP9	0.788917	0	-0.34545	0.328227	-3.59539	0.000324	#ERROR!
HECA	THAP9	0.783498	0	-0.35758	0.310376	-3.59449	0.000325	#ERROR!
DLGAP5	THAP9	0.703509	0	-0.50303	0.138334	-3.59222	0.000328	#ERROR!
CEP78	THAP9	0.782803	0	-0.35758	0.310376	-3.58996	0.000331	#ERROR!
B3GNT5	THAP9	0.753252	0	-0.41818	0.229113	-3.58806	0.000333	#ERROR!
CEP55	THAP9	0.725521	0	-0.46667	0.173939	-3.58577	0.000336	#ERROR!
FAM111B	THAP9	0.752798	0	-0.41818	0.229113	-3.58542	0.000337	#ERROR!
RBM15	THAP9	0.791909	0	-0.33333	0.346594	-3.58098	0.000342	#ERROR!
LIN54	THAP9	0.89834	0	0.042424	0.907364	-3.57594	0.000349	#ERROR!
RNU6-1048P	THAP9	0.589577	0	-0.62953	0.05113	-3.56727	0.000361	#ERROR!
FAM111A	THAP9	0.78967	0	-0.33333	0.346594	-3.56594	0.000363	#ERROR!
GCM1	THAP9	0.343163	6.01e-06	-0.78536	0.007102	-3.56529	0.000363	#ERROR!
BCL10	THAP9	0.789259	0	-0.33333	0.346594	-3.5632	0.000366	#ERROR!
G3BP2	THAP9	0.860846	0	-0.11515	0.75142	-3.55371	0.00038	#ERROR!
NUAK2	THAP9	0.677126	0	-0.52727	0.117308	-3.54838	0.000388	#ERROR!
CLCN3	THAP9	0.815542	0	-0.26061	0.467089	-3.5483	0.000388	#ERROR!
FRK	THAP9	0.745854	0	-0.41818	0.229113	-3.54557	0.000392	#ERROR!
NFE2L3	THAP9	0.745374	0	-0.41818	0.229113	-3.54285	0.000396	#ERROR!
KIF2C	THAP9	0.666484	0	-0.53939	0.107593	-3.5422	0.000397	#ERROR!
ASS1P7	THAP9	-0.34517	5.25e-06	0.780181	0.00776	3.5374	0.000404	-/+
MICAL2	THAP9	0.699724	0	-0.49091	0.149656	-3.53295	0.000411	#ERROR!
LDHA	THAP9	0.789707	0	-0.32121	0.365468	-3.53203	0.000412	#ERROR!
B4GALT5	THAP9	0.778673	0	-0.34545	0.328227	-3.52854	0.000418	#ERROR!
ARHGEF18	THAP9	0.680645	0	-0.51515	0.127553	-3.52292	0.000427	#ERROR!
LMTK2	THAP9	0.741515	0	-0.41818	0.229113	-3.52114	0.00043	#ERROR!
PRR13	THAP9	0.747961	0	-0.40606	0.244282	-3.52082	0.00043	#ERROR!
RC3H1	THAP9	0.782806	0	-0.33333	0.346594	-3.5207	0.00043	#ERROR!
PIP4K2C	THAP9	0.766115	0	-0.3697	0.29305	-3.52014	0.000431	#ERROR!
RPL9P28	THAP9	0.274909	0.000338	0.932944	8.15e-05	3.51899	0.000433	#ERROR!
AVL9	THAP9	0.81595	0	-0.24848	0.488776	-3.51875	0.000434	#ERROR!
LASP1	THAP9	0.726634	0	-0.44242	0.200423	-3.51479	0.00044	#ERROR!
PDIA3	THAP9	0.781802	0	-0.33333	0.346594	-3.5142	0.000441	#ERROR!
GLDC	THAP9	0.33312	1.16e-05	-0.78182	0.007547	-3.5137	0.000442	#ERROR!
CASP8	THAP9	0.819523	0	-0.23636	0.510885	-3.51349	0.000442	#ERROR!
POF1B	THAP9	0.770593	0	-0.35758	0.310376	-3.5125	0.000444	#ERROR!
KRT12	THAP9	0.452769	9.09e-10	-0.71953	0.018984	-3.50986	0.000448	#ERROR!
CDCP1	THAP9	0.677369	0	-0.51515	0.127553	-3.50763	0.000452	#ERROR!
KIF18A	THAP9	0.805351	0	-0.27273	0.445838	-3.5064	0.000454	#ERROR!
MIR644A	THAP9	0.319121	2.78e-05	-0.78657	0.006954	-3.50531	0.000456	#ERROR!
GNA11	THAP9	0.578931	4.44e-16	-0.62424	0.053718	-3.50468	0.000457	#ERROR!
PPP4R2	THAP9	0.818231	0	-0.23636	0.510885	-3.50362	0.000459	#ERROR!
CHP1	THAP9	0.637623	0	-0.56364	0.089724	-3.50348	0.000459	#ERROR!
APOL6	THAP9	0.716415	0	-0.45455	0.186905	-3.49933	0.000466	#ERROR!
COX2	THAP9	0.534564	1.19e-13	-0.66061	0.037588	-3.49869	0.000468	#ERROR!
ENC1	THAP9	0.716245	0	-0.45455	0.186905	-3.49845	0.000468	#ERROR!
NCEH1	THAP9	0.737411	0	-0.41818	0.229113	-3.49836	0.000468	#ERROR!
CEBPE	THAP9	-0.08411	0.281276	0.863226	0.001294	3.49813	0.000469	0/+
RND3	THAP9	0.756381	0	-0.38182	0.276255	-3.4974	0.00047	#ERROR!
RAPGEF6	THAP9	0.803972	0	-0.27273	0.445838	-3.49655	0.000471	#ERROR!
LMO7	THAP9	0.692084	0	-0.49091	0.149656	-3.49567	0.000473	#ERROR!
PSMD11	THAP9	0.821052	0	-0.22424	0.533401	-3.49304	0.000478	#ERROR!
CCNYL1	THAP9	0.755311	0	-0.38182	0.276255	-3.49112	0.000481	#ERROR!
CDK11A	THAP9	0.654766	0	-0.53939	0.107593	-3.48987	0.000483	#ERROR!
RNA5SP425	THAP9	0.119714	0.124469	-0.8528	0.001713	-3.48921	0.000484	0/-
ANLN	THAP9	0.777833	0	-0.33333	0.346594	-3.48871	0.000485	#ERROR!
DNAJC7	THAP9	0.820476	0	-0.22424	0.533401	-3.4886	0.000486	#ERROR!
FLVCR1	THAP9	0.742159	0	-0.40606	0.244282	-3.488	0.000487	#ERROR!
CENPI	THAP9	0.728302	0	-0.4303	0.214492	-3.48603	0.00049	#ERROR!
PI4K2B	THAP9	0.856786	0	-0.10303	0.776998	-3.48391	0.000494	#ERROR!
PSME4	THAP9	0.771468	0	-0.34545	0.328227	-3.48313	0.000496	#ERROR!
PLEKHA7	THAP9	0.680519	0	-0.50303	0.138334	-3.48116	0.000499	#ERROR!
NCBP1	THAP9	0.776207	0	-0.33333	0.346594	-3.47838	0.000504	#ERROR!
RPL37P12	THAP9	0.536486	9.35e-14	-0.65446	0.040047	-3.47824	0.000505	#ERROR!
OR6M1	THAP9	0.121667	0.118399	0.905953	0.000305	3.47805	0.000505	0/+
CLIC5	THAP9	0.584476	0	-0.61212	0.059972	-3.4764	0.000508	#ERROR!
LOC100288637	THAP9	0.631107	0	-0.56364	0.089724	-3.47604	0.000509	#ERROR!
DDX60	THAP9	0.619907	0	-0.57576	0.081553	-3.4749	0.000511	#ERROR!
HERC4	THAP9	0.791085	0	-0.29697	0.404702	-3.47382	0.000513	#ERROR!
NR1I2	THAP9	0.542064	4.62e-14	-0.64848	0.04254	-3.4719	0.000517	#ERROR!
MAP3K2	THAP9	0.817836	0	-0.22424	0.533401	-3.46841	0.000524	#ERROR!
PRKCD	THAP9	0.694201	0	-0.47879	0.161523	-3.46605	0.000528	#ERROR!
CAPN2	THAP9	0.694023	0	-0.47879	0.161523	-3.46519	0.00053	#ERROR!
ALAS1	THAP9	0.701565	0	-0.46667	0.173939	-3.46289	0.000534	#ERROR!
PCSK5	THAP9	0.636614	0	-0.55152	0.098401	-3.45494	0.00055	#ERROR!
HNRNPD	THAP9	0.835906	0	-0.16364	0.651477	-3.45377	0.000553	#ERROR!
GPSM2	THAP9	0.792962	0	-0.28485	0.425038	-3.45317	0.000554	#ERROR!
FEZF2	THAP9	-0.66003	0	0.522233	0.121503	3.45306	0.000554	-/0
CBWD3	THAP9	0.782814	0	-0.30909	0.384841	-3.45273	0.000555	#ERROR!
MED14	THAP9	0.80643	0	-0.24848	0.488776	-3.44869	0.000563	#ERROR!
ACSL5	THAP9	0.747825	0	-0.38182	0.276255	-3.44783	0.000565	#ERROR!
ITGA6	THAP9	0.734535	0	-0.40606	0.244282	-3.44582	0.000569	#ERROR!
GUF1	THAP9	0.814033	0	-0.22424	0.533401	-3.43978	0.000582	#ERROR!
CCNA2	THAP9	0.711358	0	-0.44242	0.200423	-3.4352	0.000592	#ERROR!
E2F7	THAP9	0.711156	0	-0.44242	0.200423	-3.43417	0.000594	#ERROR!
BHLHE41	THAP9	0.499549	7.31e-12	-0.67273	0.033041	-3.4333	0.000596	#ERROR!
HEATR5A	THAP9	0.73865	0	-0.39394	0.259998	-3.43215	0.000599	#ERROR!
POLQ	THAP9	0.678572	0	-0.49091	0.149656	-3.43155	0.0006	#ERROR!
BNIP5	THAP9	0.669727	0	-0.50303	0.138334	-3.43126	0.000601	#ERROR!
KRT27	THAP9	0.226474	0.003345	0.920749	0.000157	3.43088	0.000602	#ERROR!
LINC02805	THAP9	0.264562	0.000572	-0.79772	0.005692	-3.43057	0.000602	#ERROR!
HACD2	THAP9	0.799162	0	-0.26061	0.467089	-3.42986	0.000604	#ERROR!
IGSF3	THAP9	0.677685	0	-0.49091	0.149656	-3.42742	0.000609	#ERROR!
KIAA1217	THAP9	0.761935	0	-0.34545	0.328227	-3.42492	0.000615	#ERROR!
ATP2A2	THAP9	0.749655	0	-0.3697	0.29305	-3.42279	0.00062	#ERROR!
PPTC7	THAP9	0.793323	0	-0.27273	0.445838	-3.42255	0.00062	#ERROR!
RNY3P16	THAP9	0.489711	2.14e-11	-0.67723	0.031453	-3.42133	0.000623	#ERROR!
HKDC1	THAP9	0.478656	6.9e-11	-0.68485	0.028883	-3.42075	0.000624	#ERROR!
FAM151A	THAP9	0.527487	2.84e-13	-0.64848	0.04254	-3.42052	0.000625	#ERROR!
MYZAP	THAP9	0.715323	0	-0.4303	0.214492	-3.41784	0.000631	#ERROR!
CFLAR	THAP9	0.766314	0	-0.33333	0.346594	-3.41693	0.000633	#ERROR!
MARVELD3	THAP9	0.771275	0	-0.32121	0.365468	-3.41329	0.000642	#ERROR!
CEACAM8	THAP9	0.095337	0.221771	-0.85107	0.001791	-3.41122	0.000647	0/-
ATP1B3	THAP9	0.741131	0	-0.38182	0.276255	-3.41004	0.00065	#ERROR!
NEIL3	THAP9	0.733981	0	-0.39394	0.259998	-3.40649	0.000658	#ERROR!
KMT5B	THAP9	0.830027	0	-0.16364	0.651477	-3.40545	0.000661	#ERROR!
GOLGA2P5	THAP9	0.672883	0	-0.49091	0.149656	-3.40521	0.000661	#ERROR!
NBEAL1	THAP9	0.758283	0	-0.34545	0.328227	-3.40316	0.000666	#ERROR!
NCAPH	THAP9	0.691338	0	-0.46201	0.178857	-3.39797	0.000679	#ERROR!
EFL1	THAP9	0.763148	0	-0.33333	0.346594	-3.39775	0.000679	#ERROR!
POLE	THAP9	0.688023	0	-0.46667	0.173939	-3.39701	0.000681	#ERROR!
CLCA1	THAP9	-0.11961	0.124814	0.842424	0.00222	3.39614	0.000683	0/+
HELLS	THAP9	0.73167	0	-0.39394	0.259998	-3.39393	0.000689	#ERROR!
LOC100422399	THAP9	0.209969	0.006624	-0.81278	0.004259	-3.39274	0.000692	#ERROR!
INSR	THAP9	0.716691	0	-0.41818	0.229113	-3.38771	0.000705	#ERROR!
FNBP1L	THAP9	0.819676	0	-0.18788	0.603218	-3.38688	0.000707	#ERROR!
DOCK5	THAP9	0.608708	0	-0.56364	0.089724	-3.38448	0.000713	#ERROR!
CLCN5	THAP9	0.754786	0	-0.34545	0.328227	-3.38258	0.000718	#ERROR!
C2orf69	THAP9	0.827036	0	-0.16364	0.651477	-3.38144	0.000721	#ERROR!
EEF1A1P3	THAP9	0.347874	4.38e-06	0.936175	6.72e-05	3.37975	0.000726	#ERROR!
PARD6B	THAP9	0.722068	0	-0.40606	0.244282	-3.37901	0.000727	#ERROR!
ACRV1	THAP9	0.673732	0	-0.48172	0.158606	-3.37882	0.000728	#ERROR!
NEDD4	THAP9	0.771106	0	-0.30909	0.384841	-3.37838	0.000729	#ERROR!
HK2	THAP9	0.648588	0	-0.51515	0.127553	-3.37834	0.000729	#ERROR!
RPL18P4	THAP9	-0.70574	0	0.43316	0.211126	3.37797	0.00073	-/0
KIAA1958	THAP9	0.809909	0	-0.21212	0.556306	-3.37729	0.000732	#ERROR!
ACLY	THAP9	0.735072	0	-0.38182	0.276255	-3.37655	0.000734	#ERROR!
RAPGEF5	THAP9	0.781309	0	-0.28485	0.425038	-3.37607	0.000735	#ERROR!
KNTC1	THAP9	0.764803	0	-0.32121	0.365468	-3.37359	0.000742	#ERROR!
CEP152	THAP9	0.727845	0	-0.39394	0.259998	-3.37334	0.000743	#ERROR!
RPL13AP14	THAP9	-0.44525	1.85e-09	0.69697	0.025097	3.37223	0.000746	-/+
RAB3IP	THAP9	0.825474	0	-0.16364	0.651477	-3.36905	0.000754	#ERROR!
C1orf115	THAP9	0.51251	1.68e-12	-0.64848	0.04254	-3.36887	0.000755	#ERROR!
ABTB2	THAP9	0.496527	1.02e-11	-0.66061	0.037588	-3.36828	0.000756	#ERROR!
RNU6-574P	THAP9	0.617224	0	-0.54948	0.099911	-3.36718	0.000759	#ERROR!
RPL3P7	THAP9	-0.55086	1.47e-14	0.615865	0.057992	3.36667	0.000761	-/0
CEBPG	THAP9	0.789406	0	-0.2614	0.465685	-3.36548	0.000764	#ERROR!
RN7SL180P	THAP9	0.139393	0.073271	-0.83269	0.002787	-3.36471	0.000766	0/-
RPL19P9	THAP9	-0.1185	0.128374	0.83891	0.002414	3.36315	0.000771	0/+
LPIN2	THAP9	0.680476	0	-0.46667	0.173939	-3.3613	0.000776	#ERROR!
C2CD2L	THAP9	0.696489	0	-0.44242	0.200423	-3.36102	0.000777	#ERROR!
GDAP2	THAP9	0.783842	0	-0.27273	0.445838	-3.35945	0.000781	#ERROR!
PRSS12	THAP9	0.524354	4.15e-13	-0.63636	0.047912	-3.35768	0.000786	#ERROR!
DSC2	THAP9	0.679655	0	-0.46667	0.173939	-3.35745	0.000787	#ERROR!
MIR4653	THAP9	0.681522	0	-0.46342	0.177354	-3.35579	0.000791	#ERROR!
GUSBP11	THAP9	0.712766	0	-0.41338	0.235062	-3.35289	0.0008	#ERROR!
GDPD4	THAP9	0.45681	6.16e-10	-0.6853	0.028734	-3.35253	0.000801	#ERROR!
FAM245A	THAP9	0.438351	3.49e-09	-0.69631	0.025293	-3.34743	0.000816	#ERROR!
RAPGEF2	THAP9	0.81422	0	-0.18788	0.603218	-3.3456	0.000821	#ERROR!
CLCN2	THAP9	0.489522	2.19e-11	-0.66061	0.037588	-3.34499	0.000823	#ERROR!
CARS1	THAP9	0.795929	0	-0.23636	0.510885	-3.34249	0.00083	#ERROR!
ATIC	THAP9	0.795858	0	-0.23636	0.510885	-3.342	0.000832	#ERROR!
GPT2	THAP9	0.548151	2.11e-14	-0.61212	0.059972	-3.34177	0.000832	#ERROR!
MOB1B	THAP9	0.866863	0	-0.00606	0.986743	-3.33759	0.000845	#ERROR!
RNU7-75P	THAP9	0.427983	8.84e-09	-0.70048	0.024068	-3.33579	0.000851	#ERROR!
CENPA	THAP9	0.6828	0	-0.45455	0.186905	-3.3335	0.000858	#ERROR!
RAB8A	THAP9	0.74626	0	-0.34545	0.328227	-3.33345	0.000858	#ERROR!
MGAM	THAP9	0.431904	6.24e-09	-0.69697	0.025097	-3.33064	0.000866	#ERROR!
LOC102724153	THAP9	0.321187	2.45e-05	-0.75758	0.011143	-3.33027	0.000868	#ERROR!
ABCA11P	THAP9	0.800431	0	-0.21885	0.543551	-3.32721	0.000877	#ERROR!
ATP5MGP3	THAP9	-0.21756	0.004867	0.800909	0.005364	3.32717	0.000877	-/+
RPL21P23	THAP9	0.054376	0.486551	-0.8528	0.001713	-3.32348	0.000889	0/-
EZR	THAP9	0.702754	0	-0.41818	0.229113	-3.31703	0.00091	#ERROR!
EXOC1	THAP9	0.870643	0	0.018182	0.96024	-3.31537	0.000915	#ERROR!
RASSF6	THAP9	0.760667	0	-0.30909	0.384841	-3.31483	0.000917	#ERROR!
AFG3L2	THAP9	0.748894	0	-0.33333	0.346594	-3.314	0.00092	#ERROR!
DLG3	THAP9	0.765956	0	-0.29697	0.404702	-3.31314	0.000923	#ERROR!
DENND1C	THAP9	0.760271	0	-0.30909	0.384841	-3.31248	0.000925	#ERROR!
CDH17	THAP9	0.678138	0	-0.45455	0.186905	-3.31166	0.000927	#ERROR!
CATSPER2	THAP9	0.669193	0	-0.46667	0.173939	-3.30916	0.000936	#ERROR!
RPL27P1	THAP9	-0.60259	0	0.549477	0.099911	3.30854	0.000938	-/0
LETM1	THAP9	0.564727	2.22e-15	-0.58788	0.073878	-3.30686	0.000943	#ERROR!
RHPN2	THAP9	0.753179	0	-0.32121	0.365468	-3.30458	0.000951	#ERROR!
CCDC14	THAP9	0.766817	0	-0.29179	0.413327	-3.30413	0.000953	#ERROR!
DSG2	THAP9	0.790128	0	-0.23636	0.510885	-3.30315	0.000956	#ERROR!
PGBD2	THAP9	0.769492	0	-0.28485	0.425038	-3.30149	0.000962	#ERROR!
ANO9	THAP9	0.358076	2.17e-06	-0.73333	0.015801	-3.29783	0.000974	#ERROR!
PACSIN2	THAP9	0.720056	0	-0.38182	0.276255	-3.29624	0.00098	#ERROR!
PRR15	THAP9	0.574131	6.66e-16	-0.57576	0.081553	-3.29576	0.000982	#ERROR!
FLNB	THAP9	0.657048	0	-0.47879	0.161523	-3.29389	0.000988	#ERROR!
MND1	THAP9	0.762658	0	-0.29697	0.404702	-3.29318	0.000991	#ERROR!
ABCA5	THAP9	0.712193	0	-0.39394	0.259998	-3.29153	0.000996	#ERROR!
CC2D1B	THAP9	0.783311	0	-0.24848	0.488776	-3.29054	0.001	#ERROR!
ARG1	THAP9	0.70757	0	-0.4013	0.250385	-3.29009	0.001002	#ERROR!
BTBD9	THAP9	0.711737	0	-0.39394	0.259998	-3.2892	0.001005	#ERROR!
DHTKD1	THAP9	0.823235	0	-0.13939	0.700932	-3.28903	0.001005	#ERROR!
PDLIM1	THAP9	0.711274	0	-0.39394	0.259998	-3.28684	0.001013	#ERROR!
CEMIP2	THAP9	0.711179	0	-0.39394	0.259998	-3.28636	0.001015	#ERROR!
LEO1	THAP9	0.743915	0	-0.33333	0.346594	-3.28571	0.001017	#ERROR!
DAPK2	THAP9	0.680571	0	-0.44242	0.200423	-3.28485	0.00102	#ERROR!
RAB11FIP4	THAP9	0.688299	0	-0.4303	0.214492	-3.28376	0.001024	#ERROR!
DNAJC3	THAP9	0.736803	0	-0.34545	0.328227	-3.28058	0.001036	#ERROR!
HNRNPA2B1	THAP9	0.809466	0	-0.17576	0.627188	-3.27896	0.001042	#ERROR!
NOL10	THAP9	0.829774	0	-0.11515	0.75142	-3.27895	0.001042	#ERROR!
CDC42BPG	THAP9	0.670919	0	-0.45455	0.186905	-3.27833	0.001044	#ERROR!
LOC101927392	THAP9	0.133381	0.086681	0.893004	0.000503	3.27721	0.001048	0/+
RNGTT	THAP9	0.790911	0	-0.22424	0.533401	-3.27619	0.001052	#ERROR!
CEACAM1	THAP9	0.556342	7.11e-15	-0.58788	0.073878	-3.27609	0.001053	#ERROR!
LIN7C	THAP9	0.854099	0	-0.0303	0.933773	-3.2748	0.001057	#ERROR!
ADAM10	THAP9	0.775602	0	-0.26061	0.467089	-3.27372	0.001061	#ERROR!
ATP13A3	THAP9	0.804114	0	-0.18788	0.603218	-3.27193	0.001068	#ERROR!
MCTP2	THAP9	0.76454	0	-0.28485	0.425038	-3.27122	0.001071	#ERROR!
HEPACAM2	THAP9	0.020626	0.791956	0.866667	0.001174	3.26844	0.001081	0/+
PARP4P2	THAP9	0.61942	0	-0.5183	0.124838	-3.26638	0.001089	#ERROR!
BAHD1	THAP9	0.692206	0	-0.41818	0.229113	-3.26534	0.001093	#ERROR!
CDC7	THAP9	0.720906	0	-0.3697	0.29305	-3.26518	0.001094	#ERROR!
BLM	THAP9	0.699255	0	-0.40606	0.244282	-3.26298	0.001102	#ERROR!
CFAP73	THAP9	0.301801	7.76e-05	-0.75466	0.011645	-3.2591	0.001118	#ERROR!
EXT2	THAP9	0.810577	0	-0.16364	0.651477	-3.25569	0.001131	#ERROR!
ECE1	THAP9	0.682362	0	-0.4303	0.214492	-3.25558	0.001132	#ERROR!
FNIP1	THAP9	0.810039	0	-0.16364	0.651477	-3.25175	0.001147	#ERROR!
RPL27P6	THAP9	-0.43216	6.1e-09	0.680137	0.030454	3.25088	0.00115	-/+
CNKSR3	THAP9	0.760573	0	-0.28572	0.423568	-3.24974	0.001155	#ERROR!
CHKA	THAP9	0.696304	0	-0.40606	0.244282	-3.2485	0.00116	#ERROR!
LTO1	THAP9	0.771244	0	-0.26061	0.467089	-3.24642	0.001169	#ERROR!
CCT8P1	THAP9	0.646172	0	-0.47879	0.161523	-3.24633	0.001169	#ERROR!
AGAP4	THAP9	0.6684	0	-0.44789	0.194263	-3.24579	0.001171	#ERROR!
OFD1	THAP9	0.804866	0	-0.17576	0.627188	-3.24575	0.001171	#ERROR!
MYOM3	THAP9	0.572798	8.88e-16	-0.56364	0.089724	-3.24561	0.001172	#ERROR!
NUSAP1	THAP9	0.710078	0	-0.38182	0.276255	-3.24486	0.001175	#ERROR!
CYP3A5	THAP9	0.57128	8.88e-16	-0.56364	0.089724	-3.23993	0.001196	#ERROR!
RALA	THAP9	0.794832	0	-0.2	0.579584	-3.23888	0.0012	#ERROR!
KIF20A	THAP9	0.615155	0	-0.51515	0.127553	-3.23823	0.001203	#ERROR!
ERO1A	THAP9	0.74709	0	-0.30909	0.384841	-3.23567	0.001214	#ERROR!
RPL34P31	THAP9	-0.61328	0	0.515687	0.127089	3.23248	0.001227	-/0
RNU7-171P	THAP9	0.510641	2.09e-12	-0.61657	0.057622	-3.22857	0.001244	#ERROR!
HUS1	THAP9	0.793133	0	-0.2	0.579584	-3.22732	0.00125	#ERROR!
PDIA4	THAP9	0.768138	0	-0.26061	0.467089	-3.22725	0.00125	#ERROR!
MAPK6	THAP9	0.73898	0	-0.32219	0.363927	-3.22672	0.001252	#ERROR!
CTAGE7P	THAP9	0.67509	0	-0.43161	0.212945	-3.2257	0.001257	#ERROR!
CTR9	THAP9	0.823059	0	-0.11515	0.75142	-3.22565	0.001257	#ERROR!
RAC1	THAP9	0.745244	0	-0.30909	0.384841	-3.22519	0.001259	#ERROR!
NUP50	THAP9	0.772827	0	-0.24848	0.488776	-3.22367	0.001266	#ERROR!
MTRNR2L2	THAP9	0.433796	5.27e-09	-0.67273	0.033041	-3.22157	0.001275	#ERROR!
ESPL1	THAP9	0.577994	4.44e-16	-0.55152	0.098401	-3.22089	0.001278	#ERROR!
MTCO2P12	THAP9	0.467842	2.08e-10	-0.64848	0.04254	-3.22084	0.001278	#ERROR!
MCM6	THAP9	0.744412	0	-0.30909	0.384841	-3.22049	0.00128	#ERROR!
FAR2	THAP9	0.755951	0	-0.28485	0.425038	-3.22001	0.001282	#ERROR!
DTX4	THAP9	0.738233	0	-0.32121	0.365468	-3.21983	0.001283	#ERROR!
ACOX3	THAP9	0.731908	0	-0.33333	0.346594	-3.21937	0.001285	#ERROR!
PKIB	THAP9	0.588444	0	-0.53939	0.107593	-3.21732	0.001294	#ERROR!
NSD2	THAP9	0.731391	0	-0.33333	0.346594	-3.21657	0.001297	#ERROR!
RHOU	THAP9	0.724936	0	-0.34545	0.328227	-3.21647	0.001298	#ERROR!
LINC01762	THAP9	0.602255	0	-0.52314	0.120742	-3.21417	0.001308	#ERROR!
A1CF	THAP9	0.703949	0	-0.38182	0.276255	-3.21402	0.001309	#ERROR!
IGF2R	THAP9	0.703865	0	-0.38182	0.276255	-3.2136	0.001311	#ERROR!
DCP2	THAP9	0.754803	0	-0.28485	0.425038	-3.21328	0.001312	#ERROR!
MGAT5	THAP9	0.710663	0	-0.3697	0.29305	-3.21232	0.001317	#ERROR!
KIF16B	THAP9	0.68102	0	-0.41818	0.229113	-3.21208	0.001318	#ERROR!
EXT1	THAP9	0.754198	0	-0.28485	0.425038	-3.20974	0.001329	#ERROR!
CHP1P2	THAP9	0.637421	0	-0.47879	0.161523	-3.20888	0.001333	#ERROR!
EIF3LP1	THAP9	-0.45715	5.96e-10	0.652973	0.040658	3.20622	0.001345	-/+
ND4	THAP9	0.479305	6.45e-11	-0.63636	0.047912	-3.20609	0.001346	#ERROR!
NCAPG2	THAP9	0.76465	0	-0.26061	0.467089	-3.20598	0.001346	#ERROR!
ARNTL2	THAP9	0.626999	0	-0.49091	0.149656	-3.20507	0.00135	#ERROR!
CPD	THAP9	0.789737	0	-0.2	0.579584	-3.20444	0.001353	#ERROR!
PDS5A	THAP9	0.856279	0	0.006061	0.986743	-3.20369	0.001357	#ERROR!
RNU2-7P	THAP9	0.575187	4.44e-16	-0.54953	0.09987	-3.20315	0.001359	#ERROR!
PDLIM5	THAP9	0.779748	0	-0.22424	0.533401	-3.20289	0.001361	#ERROR!
PSMD1	THAP9	0.747072	0	-0.29697	0.404702	-3.20198	0.001365	#ERROR!
NPM1P25	THAP9	0.681609	0	-0.41338	0.235062	-3.20022	0.001373	#ERROR!
KIF13B	THAP9	0.678357	0	-0.41818	0.229113	-3.19962	0.001376	#ERROR!
NOMO1	THAP9	0.746327	0	-0.29697	0.404702	-3.19775	0.001385	#ERROR!
KCTD5	THAP9	0.727808	0	-0.33333	0.346594	-3.19729	0.001387	#ERROR!
LOC101928994	THAP9	0.454888	7.42e-10	-0.65245	0.040874	-3.19673	0.00139	#ERROR!
LUZP1	THAP9	0.733987	0	-0.32121	0.365468	-3.19651	0.001391	#ERROR!
FAM102A	THAP9	0.614996	0	-0.50303	0.138334	-3.19641	0.001391	#ERROR!
N4BP2L2-IT2	THAP9	0.643437	0	-0.46667	0.173939	-3.19526	0.001397	#ERROR!
NUP107	THAP9	0.834419	0	-0.06667	0.854813	-3.1939	0.001404	#ERROR!
DFFBP1	THAP9	0.62666	0	-0.48621	0.15419	-3.18813	0.001432	#ERROR!
PAICS	THAP9	0.867158	0	0.054545	0.881036	-3.18794	0.001433	#ERROR!
DYNLRB2	THAP9	0.4979	8.78e-12	0.948052	2.99e-05	3.18481	0.001448	#ERROR!
EPHA10	THAP9	0.50291	5.02e-12	-0.61212	0.059972	-3.1844	0.001451	#ERROR!
PASK	THAP9	0.665766	0	-0.4303	0.214492	-3.17904	0.001478	#ERROR!
CACNB1	THAP9	0.619226	0	-0.4924	0.14823	-3.17805	0.001483	#ERROR!
PPFIA1	THAP9	0.804159	0	-0.15152	0.676065	-3.17802	0.001483	#ERROR!
CS	THAP9	0.754288	0	-0.27273	0.445838	-3.1772	0.001487	#ERROR!
MYORG	THAP9	0.589086	0	-0.52727	0.117308	-3.17717	0.001487	#ERROR!
ADSS2	THAP9	0.780576	0	-0.21212	0.556306	-3.17618	0.001492	#ERROR!
LANCL3	THAP9	0.514557	1.32e-12	-0.6	0.066688	-3.17573	0.001495	#ERROR!
MIR378J	THAP9	0.596838	0	-0.51794	0.125153	-3.17493	0.001499	#ERROR!
RN7SL663P	THAP9	0.438878	3.33e-09	-0.65887	0.038271	-3.17475	0.0015	#ERROR!
ONECUT3	THAP9	-0.01338	0.864137	0.847685	0.001951	3.17371	0.001505	0/+
BRIP1	THAP9	0.785081	0	-0.2	0.579584	-3.17361	0.001506	#ERROR!
LBHD1	THAP9	0.747618	0	-0.28485	0.425038	-3.17178	0.001515	#ERROR!
LARP1B	THAP9	0.895814	0	0.187879	0.603218	-3.17175	0.001515	#ERROR!
RNU2-11P	THAP9	0.622703	0	-0.48617	0.154228	-3.17167	0.001516	#ERROR!
CLTC	THAP9	0.769539	0	-0.23636	0.510885	-3.17085	0.00152	#ERROR!
COL17A1	THAP9	0.357756	2.22e-06	-0.70909	0.021666	-3.16971	0.001526	#ERROR!
ITCH	THAP9	0.835126	0	-0.05455	0.881036	-3.16916	0.001529	#ERROR!
BAZ1A	THAP9	0.728867	0	-0.32121	0.365468	-3.16881	0.001531	#ERROR!
KIF3B	THAP9	0.758251	0	-0.26061	0.467089	-3.16765	0.001537	#ERROR!
AGPS	THAP9	0.784071	0	-0.2	0.579584	-3.167	0.00154	#ERROR!
ADIPOR2	THAP9	0.722082	0	-0.33333	0.346594	-3.16692	0.001541	#ERROR!
LOC100286962	THAP9	0.290328	0.000148	-0.74348	0.013712	-3.16339	0.001559	#ERROR!
HSP90AB2P	THAP9	0.635906	0	-0.46667	0.173939	-3.16319	0.001561	#ERROR!
EXPH5	THAP9	0.727774	0	-0.32121	0.365468	-3.16295	0.001562	#ERROR!
COA7	THAP9	0.806199	0	-0.13939	0.700932	-3.16146	0.00157	#ERROR!
CCNF	THAP9	0.495124	1.19e-11	-0.61212	0.059972	-3.15831	0.001587	#ERROR!
CYP4F60P	THAP9	0.254296	0.000946	-0.75939	0.01084	-3.1574	0.001592	#ERROR!
PPP2R1B	THAP9	0.814058	0	-0.11515	0.75142	-3.15699	0.001594	#ERROR!
GNA13	THAP9	0.756335	0	-0.26061	0.467089	-3.15635	0.001598	#ERROR!
DIP2B	THAP9	0.756161	0	-0.26061	0.467089	-3.15533	0.001603	#ERROR!
ATAD2B	THAP9	0.791722	0	-0.17576	0.627188	-3.15453	0.001608	#ERROR!
ACAA2	THAP9	0.62442	0	-0.47879	0.161523	-3.15453	0.001608	#ERROR!
AP1G1	THAP9	0.782145	0	-0.2	0.579584	-3.15447	0.001608	#ERROR!
NOP14	THAP9	0.796258	0	-0.16364	0.651477	-3.15401	0.00161	#ERROR!
FAM72D	THAP9	0.734519	0	-0.30488	0.39168	-3.15387	0.001611	#ERROR!
CLC	THAP9	-0.00534	0.945543	0.847577	0.001956	3.15251	0.001619	0/+
HNRNPDL	THAP9	0.85728	0	0.030303	0.933773	-3.15214	0.001621	#ERROR!
GAN	THAP9	0.659703	0	-0.4303	0.214492	-3.15183	0.001623	#ERROR!
PSMA3-AS1	THAP9	0.760997	0	-0.24848	0.488776	-3.15138	0.001625	#ERROR!
FAM13A-AS1	THAP9	0.691158	0	-0.38182	0.276255	-3.15132	0.001625	#ERROR!
ND2	THAP9	0.623538	0	-0.47879	0.161523	-3.15089	0.001628	#ERROR!
GRB2	THAP9	0.76628	0	-0.23636	0.510885	-3.15086	0.001628	#ERROR!
IVNS1ABP	THAP9	0.675758	0	-0.40606	0.244282	-3.15081	0.001628	#ERROR!
MIR4768	THAP9	0.071616	0.359191	-0.82753	0.003126	-3.1504	0.00163	0/-
NBPF20	THAP9	0.73757	0	-0.29697	0.404702	-3.14872	0.00164	#ERROR!
MYH14	THAP9	0.533305	1.39e-13	-0.57576	0.081553	-3.14752	0.001647	#ERROR!
LGR4	THAP9	0.730761	0	-0.30909	0.384841	-3.14514	0.00166	#ERROR!
PANK3	THAP9	0.748711	0	-0.27273	0.445838	-3.14495	0.001661	#ERROR!
ELK4	THAP9	0.736704	0	-0.29697	0.404702	-3.14395	0.001667	#ERROR!
LINC02033	THAP9	0.4655	2.63e-10	-0.63222	0.049846	-3.14393	0.001667	#ERROR!
MACC1	THAP9	0.78525	0	-0.18788	0.603218	-3.14303	0.001672	#ERROR!
LHFPL2	THAP9	0.696734	0	-0.3697	0.29305	-3.14287	0.001673	#ERROR!
DDTL	THAP9	0.530087	2.07e-13	-0.57751	0.080413	-3.14284	0.001673	#ERROR!
ANKRD19P	THAP9	0.641561	0	-0.45262	0.189017	-3.1424	0.001676	#ERROR!
OCLN	THAP9	0.742404	0	-0.28485	0.425038	-3.14229	0.001676	#ERROR!
OSBPL11	THAP9	0.764865	0	-0.23636	0.510885	-3.14226	0.001676	#ERROR!
RAD18	THAP9	0.764197	0	-0.23636	0.510885	-3.13822	0.0017	#ERROR!
RPL5P1	THAP9	-0.17316	0.025682	0.790277	0.006514	3.13807	0.001701	-/+
PHACTR2	THAP9	0.752988	0	-0.26061	0.467089	-3.13679	0.001708	#ERROR!
CHD1	THAP9	0.784161	0	-0.18788	0.603218	-3.13589	0.001713	#ERROR!
KIF21A	THAP9	0.784096	0	-0.18788	0.603218	-3.13547	0.001716	#ERROR!
PGGT1B	THAP9	0.768706	0	-0.22424	0.533401	-3.13351	0.001727	#ERROR!
COBL	THAP9	0.663628	0	-0.41818	0.229113	-3.1322	0.001735	#ERROR!
CLEC10A	THAP9	0.239017	0.001927	0.90303	0.000344	3.13199	0.001736	#ERROR!
NCOR1	THAP9	0.746306	0	-0.27273	0.445838	-3.13124	0.001741	#ERROR!
LOC100422204	THAP9	0.471845	1.39e-10	-0.62424	0.053718	-3.13122	0.001741	#ERROR!
IDI2-AS1	THAP9	0.4888	2.36e-11	-0.60977	0.06124	-3.12787	0.001761	#ERROR!
ABCB1	THAP9	0.55254	1.2e-14	-0.55152	0.098401	-3.12674	0.001768	#ERROR!
LARP7P1	THAP9	0.26459	0.000571	-0.74903	0.012657	-3.12468	0.00178	#ERROR!
DSP	THAP9	0.706936	0	-0.34545	0.328227	-3.12352	0.001787	#ERROR!
RNU1-103P	THAP9	0.413522	3.07e-08	-0.6648	0.03597	-3.12331	0.001788	#ERROR!
HNRNPA3P3	THAP9	0.717198	0	-0.32619	0.357652	-3.12127	0.001801	#ERROR!
PWWP2A	THAP9	0.800532	0	-0.13939	0.700932	-3.12124	0.001801	#ERROR!
MYO15B	THAP9	0.418612	1.99e-08	-0.66061	0.037588	-3.11997	0.001809	#ERROR!
MCM8	THAP9	0.684569	0	-0.38182	0.276255	-3.11985	0.001809	#ERROR!
KTN1	THAP9	0.761118	0	-0.23636	0.510885	-3.1197	0.00181	#ERROR!
AFTPH	THAP9	0.817159	0	-0.09091	0.802772	-3.11864	0.001817	#ERROR!
EXOSC9	THAP9	0.866363	0	0.078788	0.828717	-3.11862	0.001817	#ERROR!
ANK3	THAP9	0.790803	0	-0.16364	0.651477	-3.11694	0.001827	#ERROR!
RNU6-388P	THAP9	0.556119	7.33e-15	-0.54495	0.103316	-3.11612	0.001832	#ERROR!
GCSAM	THAP9	0.594652	0	-0.50303	0.138334	-3.11567	0.001835	#ERROR!
DPP3	THAP9	0.675746	0	-0.39394	0.259998	-3.11444	0.001843	#ERROR!
ACVR2A	THAP9	0.79445	0	-0.15152	0.676065	-3.11035	0.001869	#ERROR!
ANKHD1-EIF4EBP3	THAP9	0.704084	0	-0.34545	0.328227	-3.10923	0.001876	#ERROR!
PAQR8	THAP9	0.632153	0	-0.45455	0.186905	-3.10868	0.001879	#ERROR!
COPG2	THAP9	0.769859	0	-0.21212	0.556306	-3.10859	0.00188	#ERROR!
DHX15	THAP9	0.842281	0	-0.00606	0.986743	-3.10774	0.001885	#ERROR!
BIRC6	THAP9	0.759065	0	-0.23636	0.510885	-3.10746	0.001887	#ERROR!
NFRKB	THAP9	0.74778	0	-0.26061	0.467089	-3.10679	0.001891	#ERROR!
LMNB1	THAP9	0.67409	0	-0.39394	0.259998	-3.10679	0.001891	#ERROR!
RPL7AP39	THAP9	0.563977	2.66e-15	-0.53378	0.112025	-3.1053	0.001901	#ERROR!
PIGW	THAP9	0.776431	0	-0.19453	0.590207	-3.10353	0.001912	#ERROR!
ELAVL1	THAP9	0.788613	0	-0.16364	0.651477	-3.1023	0.00192	#ERROR!
LGALSL	THAP9	0.810725	0	-0.10303	0.776998	-3.10146	0.001926	#ERROR!
KIF18B	THAP9	0.532594	1.52e-13	-0.56364	0.089724	-3.09987	0.001936	#ERROR!
RPL15P17	THAP9	-0.02043	0.793847	0.837022	0.002523	3.09905	0.001941	0/+
ATP2B1	THAP9	0.792522	0	-0.15152	0.676065	-3.09726	0.001953	#ERROR!
KPNB1	THAP9	0.801174	0	-0.12727	0.726057	-3.09469	0.00197	#ERROR!
CCDC65	THAP9	0.613411	0	-0.47417	0.166192	-3.09458	0.001971	#ERROR!
MYO1B	THAP9	0.7873	0	-0.16364	0.651477	-3.09359	0.001978	#ERROR!
CTNNA1	THAP9	0.727376	0	-0.29697	0.404702	-3.09338	0.001979	#ERROR!
PBLD	THAP9	0.598894	0	-0.49091	0.149656	-3.09174	0.00199	#ERROR!
RNPC3	THAP9	0.821615	0	-0.06667	0.854813	-3.09138	0.001992	#ERROR!
MYO1E	THAP9	0.720571	0	-0.30909	0.384841	-3.09098	0.001995	#ERROR!
CDK11B	THAP9	0.738852	0	-0.27273	0.445838	-3.08942	0.002005	#ERROR!
FERP1	THAP9	0.524937	3.87e-13	-0.568	0.086726	-3.08927	0.002007	#ERROR!
RPL31P62	THAP9	0.440051	2.99e-09	-0.63799	0.047165	-3.08771	0.002017	#ERROR!
POP1	THAP9	0.699494	0	-0.34545	0.328227	-3.08647	0.002025	#ERROR!
NCAPD2	THAP9	0.713083	0	-0.32121	0.365468	-3.08608	0.002028	#ERROR!
NOXO1	THAP9	-0.63579	0	0.442217	0.200659	3.08514	0.002035	-/0
ATAD2	THAP9	0.766018	0	-0.21212	0.556306	-3.08503	0.002035	#ERROR!
HSPA5	THAP9	0.760702	0	-0.22424	0.533401	-3.085	0.002036	#ERROR!
HS2ST1	THAP9	0.866036	0	0.090909	0.802772	-3.0846	0.002038	#ERROR!
MOB3B	THAP9	0.635502	0	-0.44242	0.200423	-3.08459	0.002038	#ERROR!
HSPA4	THAP9	0.755009	0	-0.23636	0.510885	-3.08355	0.002045	#ERROR!
FANCI	THAP9	0.718933	0	-0.30909	0.384841	-3.08242	0.002053	#ERROR!
KLF6	THAP9	0.749194	0	-0.24848	0.488776	-3.08227	0.002054	#ERROR!
PRKDC	THAP9	0.731488	0	-0.28485	0.425038	-3.08217	0.002055	#ERROR!
PPP6R3	THAP9	0.84276	0	0.006079	0.986703	-3.08134	0.002061	#ERROR!
PTPN9	THAP9	0.74895	0	-0.24848	0.488776	-3.08087	0.002064	#ERROR!
RNU2-33P	THAP9	0.395461	1.34e-07	-0.66742	0.034982	-3.08083	0.002064	#ERROR!
LOC105379252	THAP9	0.26522	0.000554	-0.74084	0.014235	-3.08013	0.002069	#ERROR!
LOC101928596	THAP9	0.375866	6.03e-07	-0.67973	0.030593	-3.07959	0.002073	#ERROR!
MARVELD2	THAP9	0.697783	0	-0.34545	0.328227	-3.07806	0.002084	#ERROR!
CIT	THAP9	0.642753	0	-0.4303	0.214492	-3.07776	0.002086	#ERROR!
GRAPL	THAP9	0.536465	9.37e-14	-0.55336	0.097046	-3.07593	0.002098	#ERROR!
PVR	THAP9	0.736194	0	-0.27273	0.445838	-3.07475	0.002107	#ERROR!
KIF1C	THAP9	0.717268	0	-0.30909	0.384841	-3.07377	0.002114	#ERROR!
IST1	THAP9	0.788991	0	-0.15152	0.676065	-3.07354	0.002115	#ERROR!
NAA15	THAP9	0.867905	0	0.10303	0.776998	-3.07274	0.002121	#ERROR!
ERMN	THAP9	0.49364	1.4e-11	-0.59147	0.071695	-3.0719	0.002127	#ERROR!
MAPK1	THAP9	0.773952	0	-0.18788	0.603218	-3.07052	0.002137	#ERROR!
NOSTRIN	THAP9	0.665948	0	-0.39394	0.259998	-3.06961	0.002143	#ERROR!
PAIP1P1	THAP9	0.537483	8.26e-14	-0.55048	0.099165	-3.06911	0.002147	#ERROR!
PPP3CA	THAP9	0.792873	0	-0.13939	0.700932	-3.06847	0.002152	#ERROR!
COP1P1	THAP9	-0.06718	0.389805	0.81838	0.003799	3.06782	0.002156	0/+
LINC02487	THAP9	0.591049	0	-0.4924	0.14823	-3.06615	0.002168	#ERROR!
ARHGAP26-AS1	THAP9	0.017731	0.820626	0.844232	0.002125	3.06485	0.002178	0/+
APC	THAP9	0.715505	0	-0.30909	0.384841	-3.06465	0.002179	#ERROR!
EFCAB13	THAP9	0.708313	0	-0.32121	0.365468	-3.06183	0.0022	#ERROR!
E2F8	THAP9	0.694415	0	-0.34545	0.328227	-3.06162	0.002201	#ERROR!
FRYL	THAP9	0.772416	0	-0.18788	0.603218	-3.06092	0.002207	#ERROR!
DNA2	THAP9	0.700596	0	-0.33435	0.345036	-3.06031	0.002211	#ERROR!
EIF2S3B	THAP9	0.047472	0.543613	0.851998	0.001749	3.05956	0.002217	0/+
HROB	THAP9	0.579951	2.22e-16	-0.50303	0.138334	-3.0592	0.002219	#ERROR!
GRAMD4	THAP9	0.647053	0	-0.41818	0.229113	-3.05909	0.00222	#ERROR!
LINC02518	THAP9	0.133104	0.087344	0.873863	0.000949	3.05807	0.002228	0/+
MAGI3	THAP9	0.776849	0	-0.17576	0.627188	-3.05726	0.002234	#ERROR!
PSEN1	THAP9	0.732974	0	-0.27273	0.445838	-3.05716	0.002234	#ERROR!
CDCA5	THAP9	0.637496	0	-0.4303	0.214492	-3.05535	0.002248	#ERROR!
HSP90B1	THAP9	0.808578	0	-0.09091	0.802772	-3.05498	0.002251	#ERROR!
MAPK1IP1L	THAP9	0.744364	0	-0.24848	0.488776	-3.05479	0.002252	#ERROR!
NPEPPS	THAP9	0.804247	0	-0.10303	0.776998	-3.05461	0.002254	#ERROR!
LINC02728	THAP9	0.644602	0	-0.41983	0.227099	-3.05352	0.002262	#ERROR!
CLCA2	THAP9	0.209996	0.006617	0.890909	0.000542	3.05267	0.002268	#ERROR!
GAREM1	THAP9	0.749573	0	-0.23636	0.510885	-3.05204	0.002273	#ERROR!
HYOU1	THAP9	0.737897	0	-0.26061	0.467089	-3.0513	0.002279	#ERROR!
ARR3	THAP9	0.675998	0	-0.37196	0.289877	-3.05078	0.002282	#ERROR!
GCOM1	THAP9	0.627376	0	-0.44242	0.200423	-3.05058	0.002284	#ERROR!
FEN1	THAP9	0.669588	0	-0.38182	0.276255	-3.05023	0.002287	#ERROR!
PTPRH	THAP9	0.430099	7.33e-09	-0.63636	0.047912	-3.04992	0.002289	#ERROR!
LINC01811	THAP9	0.559758	4.44e-15	-0.52223	0.121503	-3.04949	0.002292	#ERROR!
PPP2CB	THAP9	0.749107	0	-0.23636	0.510885	-3.04936	0.002293	#ERROR!
DST	THAP9	0.711543	0	-0.30909	0.384841	-3.04434	0.002332	#ERROR!
PDE12	THAP9	0.793825	0	-0.12727	0.726057	-3.04388	0.002335	#ERROR!
PRXL2A	THAP9	0.764397	0	-0.2	0.579584	-3.04334	0.00234	#ERROR!
EYA3	THAP9	0.753493	0	-0.22424	0.533401	-3.0425	0.002346	#ERROR!
CNST	THAP9	0.797718	0	-0.11515	0.75142	-3.03963	0.002369	#ERROR!
PDXP-DT	THAP9	0.324141	2.04e-05	-0.70208	0.023608	-3.03885	0.002375	#ERROR!
IPMK	THAP9	0.801965	0	-0.10303	0.776998	-3.03843	0.002378	#ERROR!
GLTP	THAP9	0.806058	0	-0.09091	0.802772	-3.03678	0.002391	#ERROR!
MGAT4A	THAP9	0.757895	0	-0.21212	0.556306	-3.03629	0.002395	#ERROR!
RESF1	THAP9	0.75221	0	-0.22424	0.533401	-3.03504	0.002405	#ERROR!
CDV3	THAP9	0.757659	0	-0.21212	0.556306	-3.0349	0.002406	#ERROR!
JRKL	THAP9	0.839128	0	0.012158	0.973408	-3.03483	0.002407	#ERROR!
FAR1	THAP9	0.833629	0	-0.00606	0.986743	-3.03462	0.002408	#ERROR!
DCLRE1C	THAP9	0.762927	0	-0.2	0.579584	-3.03446	0.00241	#ERROR!
FANCD2	THAP9	0.666112	0	-0.38182	0.276255	-3.03445	0.00241	#ERROR!
NETO2	THAP9	0.456985	6.06e-10	-0.61212	0.059972	-3.03418	0.002412	#ERROR!
HERC3	THAP9	0.809749	0	-0.07879	0.828717	-3.0328	0.002423	#ERROR!
MFSD14B	THAP9	0.762584	0	-0.2	0.579584	-3.0324	0.002426	#ERROR!
KIFC1	THAP9	0.550221	1.6e-14	-0.52727	0.117308	-3.03231	0.002427	#ERROR!
RPL10AP2	THAP9	0.067832	0.385199	0.854545	0.001637	3.03173	0.002432	0/+
MBD2	THAP9	0.756863	0	-0.21212	0.556306	-3.0302	0.002444	#ERROR!
RNU6-118P	THAP9	0.44613	1.7e-09	-0.61934	0.056192	-3.02913	0.002453	#ERROR!
PRR14L	THAP9	0.727745	0	-0.27273	0.445838	-3.02895	0.002454	#ERROR!
FAM199X	THAP9	0.821446	0	-0.04242	0.907364	-3.02889	0.002455	#ERROR!
NUP98	THAP9	0.821431	0	-0.04242	0.907364	-3.02877	0.002456	#ERROR!
IDI1	THAP9	0.767184	0	-0.18788	0.603218	-3.0286	0.002457	#ERROR!
EGFR	THAP9	0.721318	0	-0.28485	0.425038	-3.02798	0.002462	#ERROR!
CHST6	THAP9	0.307189	5.68e-05	-0.70909	0.021666	-3.0266	0.002473	#ERROR!
MIR3682	THAP9	0.706662	0	-0.31098	0.381787	-3.02491	0.002487	#ERROR!
MCM9	THAP9	0.808532	0	-0.07879	0.828717	-3.02393	0.002495	#ERROR!
FNDC3B	THAP9	0.766403	0	-0.18788	0.603218	-3.02383	0.002496	#ERROR!
ACTG1P25	THAP9	0.662185	0	-0.38415	0.273081	-3.02365	0.002497	#ERROR!
HMGB3	THAP9	0.744518	0	-0.23636	0.510885	-3.02325	0.002501	#ERROR!
EPB41L3	THAP9	0.468617	1.92e-10	-0.6	0.066688	-3.02321	0.002501	#ERROR!
PPFIBP2	THAP9	0.771375	0	-0.17576	0.627188	-3.02289	0.002504	#ERROR!
ARHGAP26	THAP9	0.655423	0	-0.39394	0.259998	-3.0226	0.002506	#ERROR!
GXYLT1	THAP9	0.799659	0	-0.10303	0.776998	-3.02226	0.002509	#ERROR!
ANKS4B	THAP9	0.671189	0	-0.3697	0.29305	-3.02203	0.002511	#ERROR!
FANCC	THAP9	0.726365	0	-0.27273	0.445838	-3.02159	0.002515	#ERROR!
DNAJC16	THAP9	0.808104	0	-0.07879	0.828717	-3.02082	0.002521	#ERROR!
GRSF1	THAP9	0.868845	0	0.127273	0.726057	-3.02054	0.002523	#ERROR!
MYH9	THAP9	0.662686	0	-0.38182	0.276255	-3.01901	0.002536	#ERROR!
CTAGE8	THAP9	0.708145	0	-0.30582	0.390148	-3.01803	0.002544	#ERROR!
NCAPD3	THAP9	0.718422	0	-0.28485	0.425038	-3.01286	0.002588	#ERROR!
MRPS9-AS1	THAP9	0.604901	0	-0.45873	0.182361	-3.0109	0.002605	#ERROR!
EEF2K	THAP9	0.788614	0	-0.12727	0.726057	-3.00881	0.002623	#ERROR!
AATF	THAP9	0.773853	0	-0.16364	0.651477	-3.00696	0.002639	#ERROR!
ANKRD28	THAP9	0.778767	0	-0.15152	0.676065	-3.0068	0.00264	#ERROR!
OTUD7B	THAP9	0.740986	0	-0.23636	0.510885	-3.00343	0.00267	#ERROR!
DDX52	THAP9	0.837205	0	0.018182	0.96024	-3.0034	0.00267	#ERROR!
ANPEP	THAP9	0.252039	0.001054	-0.73333	0.015801	-3.0032	0.002672	#ERROR!
CASP2	THAP9	0.740814	0	-0.23636	0.510885	-3.00247	0.002678	#ERROR!
CENPO	THAP9	0.703127	0	-0.30909	0.384841	-3.00196	0.002682	#ERROR!
LOC100128770	THAP9	0.574974	4.44e-16	-0.49091	0.149656	-2.9999	0.002701	#ERROR!
ARHGAP17	THAP9	0.728421	0	-0.26061	0.467089	-2.99974	0.002702	#ERROR!
FZD5	THAP9	0.595595	0	-0.46667	0.173939	-2.99968	0.002703	#ERROR!
NCL	THAP9	0.762325	0	-0.18788	0.603218	-2.99915	0.002707	#ERROR!
RBM19	THAP9	0.772575	0	-0.16364	0.651477	-2.99896	0.002709	#ERROR!
CWC25	THAP9	0.804981	0	-0.07879	0.828717	-2.99833	0.002715	#ERROR!
MFSD13B	THAP9	0.594296	0	-0.46775	0.172809	-2.9981	0.002717	#ERROR!
CYP2C19	THAP9	0.351958	3.32e-06	-0.67705	0.031513	-2.99777	0.00272	#ERROR!
RNU6-1024P	THAP9	0.594552	0	-0.46727	0.173308	-2.99756	0.002721	#ERROR!
PIGG	THAP9	0.777314	0	-0.15152	0.676065	-2.99753	0.002722	#ERROR!
DLEU2	THAP9	0.688201	0	-0.33333	0.346594	-2.99719	0.002725	#ERROR!
LAMA3	THAP9	0.604632	0	-0.45455	0.186905	-2.99651	0.002731	#ERROR!
NT5C3A	THAP9	0.795923	0	-0.10303	0.776998	-2.99639	0.002732	#ERROR!
MARK2	THAP9	0.733806	0	-0.24848	0.488776	-2.99623	0.002733	#ERROR!
PITRM1-AS1	THAP9	0.613755	0	-0.44242	0.200423	-2.99483	0.002746	#ERROR!
ARHGEF5	THAP9	0.721211	0	-0.27273	0.445838	-2.99435	0.00275	#ERROR!
LRRC37A2	THAP9	0.756056	0	-0.2	0.579584	-2.9936	0.002757	#ERROR!
CCNE2	THAP9	0.771305	0	-0.16364	0.651477	-2.99105	0.00278	#ERROR!
DHCR24	THAP9	0.55032	1.6e-14	-0.51515	0.127553	-2.99079	0.002783	#ERROR!
ITLN1	THAP9	-0.13737	0.077574	0.781818	0.007547	2.99009	0.002789	0/+
PPP1R14C	THAP9	0.549587	1.73e-14	-0.51515	0.127553	-2.98814	0.002807	#ERROR!
CUL3	THAP9	0.79916	0	-0.09091	0.802772	-2.98799	0.002808	#ERROR!
PDPK1	THAP9	0.772966	0	-0.15806	0.662762	-2.98698	0.002817	#ERROR!
ATP11B	THAP9	0.760272	0	-0.18788	0.603218	-2.98686	0.002819	#ERROR!
CCKAR	THAP9	0.123331	0.113409	0.864473	0.001249	2.98641	0.002823	0/+
PSD4	THAP9	0.663003	0	-0.3697	0.29305	-2.98492	0.002837	#ERROR!
NHSL1	THAP9	0.591787	0	-0.46667	0.173939	-2.98489	0.002837	#ERROR!
PWRN1	THAP9	0.278661	0.000277	-0.71617	0.019819	-2.98428	0.002842	#ERROR!
INCENP	THAP9	0.646338	0	-0.39394	0.259998	-2.98294	0.002855	#ERROR!
PIGS	THAP9	0.601111	0	-0.45455	0.186905	-2.98259	0.002858	#ERROR!
GGCT	THAP9	0.769667	0	-0.16364	0.651477	-2.98091	0.002874	#ERROR!
PSMD12	THAP9	0.815123	0	-0.04242	0.907364	-2.98072	0.002876	#ERROR!
MED13	THAP9	0.798026	0	-0.09091	0.802772	-2.98011	0.002881	#ERROR!
MET	THAP9	0.758863	0	-0.18788	0.603218	-2.97848	0.002897	#ERROR!
CSTF2	THAP9	0.747909	0	-0.21212	0.556306	-2.97827	0.002899	#ERROR!
CNOT11	THAP9	0.783835	0	-0.12727	0.726057	-2.97732	0.002908	#ERROR!
IQGAP2	THAP9	0.546125	2.75e-14	-0.51515	0.127553	-2.97569	0.002923	#ERROR!
MTA2	THAP9	0.747416	0	-0.21212	0.556306	-2.97546	0.002925	#ERROR!
PTBP1	THAP9	0.735776	0	-0.23636	0.510885	-2.9746	0.002934	#ERROR!
PRDM4	THAP9	0.810129	0	-0.05455	0.881036	-2.9743	0.002937	#ERROR!
RNU6-307P	THAP9	0.444587	1.97e-09	-0.60678	0.062874	-2.97364	0.002943	#ERROR!
GALNT1	THAP9	0.752627	0	-0.2	0.579584	-2.97358	0.002943	#ERROR!
PCAT1	THAP9	0.582636	2.22e-16	-0.47371	0.166661	-2.97248	0.002954	#ERROR!
ADAMTS3	THAP9	0.607205	0	-0.44313	0.199621	-2.97077	0.002971	#ERROR!
MCM10	THAP9	0.651707	0	-0.38182	0.276255	-2.97038	0.002974	#ERROR!
HSD3B1	THAP9	0.242782	0.001623	-0.73172	0.016152	-2.96963	0.002982	#ERROR!
EPRS1	THAP9	0.782339	0	-0.12727	0.726057	-2.96759	0.003001	#ERROR!
CHORDC1	THAP9	0.791674	0	-0.10303	0.776998	-2.96748	0.003002	#ERROR!
MTF1	THAP9	0.74582	0	-0.21212	0.556306	-2.96639	0.003013	#ERROR!
RAVER2	THAP9	0.821001	0	-0.01818	0.96024	-2.96438	0.003033	#ERROR!
ARFGEF1	THAP9	0.78657	0	-0.11515	0.75142	-2.96431	0.003034	#ERROR!
RN7SL834P	THAP9	0.599735	0	-0.44985	0.192076	-2.96232	0.003053	#ERROR!
RBL1	THAP9	0.750374	0	-0.20061	0.578406	-2.96215	0.003055	#ERROR!
RPL5P28	THAP9	-0.16048	0.038887	0.767842	0.009499	2.96152	0.003061	-/+
IMPA1	THAP9	0.79068	0	-0.10303	0.776998	-2.9608	0.003068	#ERROR!
MAML2	THAP9	0.77147	0	-0.15152	0.676065	-2.9608	0.003068	#ERROR!
B4GALNT3	THAP9	0.59551	0	-0.45455	0.186905	-2.96064	0.00307	#ERROR!
EFTUD2	THAP9	0.739035	0	-0.22424	0.533401	-2.96037	0.003073	#ERROR!
BMS1	THAP9	0.766244	0	-0.16364	0.651477	-2.95991	0.003077	#ERROR!
NUDT4	THAP9	0.766166	0	-0.16364	0.651477	-2.95944	0.003082	#ERROR!
CEP250	THAP9	0.680199	0	-0.33333	0.346594	-2.95934	0.003083	#ERROR!
FGD4	THAP9	0.726946	0	-0.24848	0.488776	-2.95923	0.003084	#ERROR!
CMAS	THAP9	0.744526	0	-0.21212	0.556306	-2.95906	0.003086	#ERROR!
PCYT1A	THAP9	0.755561	0	-0.18788	0.603218	-2.959	0.003086	#ERROR!
IMMT	THAP9	0.790289	0	-0.10303	0.776998	-2.95818	0.003095	#ERROR!
ATP6V0A2	THAP9	0.760671	0	-0.17576	0.627188	-2.9577	0.003099	#ERROR!
KHDRBS1	THAP9	0.811936	0	-0.04242	0.907364	-2.95701	0.003106	#ERROR!
RNF10	THAP9	0.76289	0	-0.17021	0.638259	-2.95662	0.00311	#ERROR!
PATJ	THAP9	0.807655	0	-0.05455	0.881036	-2.95629	0.003114	#ERROR!
DDI2	THAP9	0.794559	0	-0.09091	0.802772	-2.95626	0.003114	#ERROR!
GTF3C2	THAP9	0.811655	0	-0.04242	0.907364	-2.95494	0.003127	#ERROR!
RFWD3	THAP9	0.738007	0	-0.22424	0.533401	-2.95467	0.00313	#ERROR!
NASP	THAP9	0.760113	0	-0.17576	0.627188	-2.95437	0.003133	#ERROR!
GCLM	THAP9	0.76519	0	-0.16364	0.651477	-2.9535	0.003142	#ERROR!
B4GALT1	THAP9	0.678943	0	-0.33333	0.346594	-2.95346	0.003142	#ERROR!
AFDN	THAP9	0.775209	0	-0.13939	0.700932	-2.95305	0.003147	#ERROR!
HOXD8	THAP9	0.507525	2.98e-12	0.939394	5.48e-05	2.95284	0.003149	#ERROR!
ACTR2	THAP9	0.770051	0	-0.15152	0.676065	-2.952	0.003157	#ERROR!
CENPJ	THAP9	0.692703	0	-0.30909	0.384841	-2.95082	0.003169	#ERROR!
CLEC16A	THAP9	0.706118	0	-0.28485	0.425038	-2.95	0.003178	#ERROR!
DOP1B	THAP9	0.670056	0	-0.34651	0.326657	-2.94991	0.003179	#ERROR!
ANKRD17	THAP9	0.806766	0	-0.05455	0.881036	-2.94987	0.003179	#ERROR!
EML4	THAP9	0.806739	0	-0.05455	0.881036	-2.94967	0.003181	#ERROR!
CLSTN1	THAP9	0.685347	0	-0.32121	0.365468	-2.94944	0.003184	#ERROR!
RN7SL213P	THAP9	0.079372	0.309385	-0.79772	0.005692	-2.94877	0.00319	0/-
CDKN2D	THAP9	0.592283	0	-0.45455	0.186905	-2.94809	0.003197	#ERROR!
NSUN6	THAP9	0.810698	0	-0.04242	0.907364	-2.94789	0.003199	#ERROR!
CTAGE15	THAP9	0.360611	1.82e-06	-0.66061	0.037588	-2.94781	0.0032	#ERROR!
RMND5A	THAP9	0.793299	0	-0.09091	0.802772	-2.94769	0.003202	#ERROR!
HMGCR	THAP9	0.718511	0	-0.26061	0.467089	-2.94741	0.003205	#ERROR!
NAT10	THAP9	0.783664	0	-0.11515	0.75142	-2.94525	0.003227	#ERROR!
CDCA8	THAP9	0.601292	0	-0.44242	0.200423	-2.94512	0.003228	#ERROR!
MALT1	THAP9	0.758332	0	-0.17576	0.627188	-2.94379	0.003242	#ERROR!
PDE9A	THAP9	0.443467	2.18e-09	-0.6	0.066688	-2.9433	0.003247	#ERROR!
AUNIP	THAP9	0.580532	2.22e-16	-0.46667	0.173939	-2.94174	0.003264	#ERROR!
LARP4B	THAP9	0.763183	0	-0.16364	0.651477	-2.94136	0.003268	#ERROR!
KIAA1109	THAP9	0.829619	0	0.018182	0.96024	-2.9409	0.003273	#ERROR!
GOLGA4	THAP9	0.763031	0	-0.16364	0.651477	-2.94044	0.003277	#ERROR!
PDE8A	THAP9	0.796646	0	-0.07879	0.828717	-2.93985	0.003284	#ERROR!
BRCA2	THAP9	0.690199	0	-0.30909	0.384841	-2.93874	0.003295	#ERROR!
PRDM15	THAP9	0.703842	0	-0.28485	0.425038	-2.93862	0.003297	#ERROR!
CBX5	THAP9	0.740807	0	-0.21212	0.556306	-2.9382	0.003301	#ERROR!
BNIP3P11	THAP9	0.675453	0	-0.33333	0.346594	-2.93724	0.003311	#ERROR!
DLAT	THAP9	0.817452	0	-0.01818	0.96024	-2.93723	0.003312	#ERROR!
RAB14	THAP9	0.762379	0	-0.16364	0.651477	-2.93652	0.003319	#ERROR!
KMT5A	THAP9	0.762311	0	-0.16364	0.651477	-2.93612	0.003324	#ERROR!
CLSPN	THAP9	0.608318	0	-0.4303	0.214492	-2.93532	0.003332	#ERROR!
PPP2R3A	THAP9	0.75147	0	-0.18788	0.603218	-2.93519	0.003333	#ERROR!
MTHFR	THAP9	0.682208	0	-0.32121	0.365468	-2.93461	0.00334	#ERROR!
ACVR1B	THAP9	0.716035	0	-0.26061	0.467089	-2.93458	0.00334	#ERROR!
HADHA	THAP9	0.756275	0	-0.17576	0.627188	-2.93165	0.003372	#ERROR!
OXSR1	THAP9	0.766696	0	-0.15152	0.676065	-2.93139	0.003374	#ERROR!
GPR89A	THAP9	0.750522	0	-0.18788	0.603218	-2.92971	0.003393	#ERROR!
ARL6IP1	THAP9	0.785978	0	-0.10303	0.776998	-2.92954	0.003395	#ERROR!
EML6	THAP9	0.650308	0	-0.3697	0.29305	-2.92875	0.003403	#ERROR!
RNU4-89P	THAP9	0.471217	1.48e-10	-0.57273	0.083544	-2.92702	0.003422	#ERROR!
CEP135	THAP9	0.824019	0	0.006061	0.986743	-2.92685	0.003424	#ERROR!
F11R	THAP9	0.726768	0	-0.23636	0.510885	-2.92588	0.003435	#ERROR!
MAL2-AS1	THAP9	0.50229	5.39e-12	-0.54437	0.10376	-2.92573	0.003436	#ERROR!
DIAPH2	THAP9	0.823659	0	0.006061	0.986743	-2.92403	0.003455	#ERROR!
ARCN1	THAP9	0.815647	0	-0.01818	0.96024	-2.9236	0.00346	#ERROR!
G3BP1	THAP9	0.802981	0	-0.05455	0.881036	-2.92282	0.003469	#ERROR!
HNF1B	THAP9	0.67227	0	-0.33333	0.346594	-2.92257	0.003472	#ERROR!
AMBRA1	THAP9	0.760038	0	-0.16364	0.651477	-2.92252	0.003472	#ERROR!
AURKA	THAP9	0.700559	0	-0.28485	0.425038	-2.92232	0.003474	#ERROR!
MCM4	THAP9	0.700463	0	-0.28485	0.425038	-2.92185	0.00348	#ERROR!
GNL2	THAP9	0.815324	0	-0.01818	0.96024	-2.92117	0.003487	#ERROR!
EIF4G3	THAP9	0.770071	0	-0.13939	0.700932	-2.92097	0.003489	#ERROR!
LRP2BP	THAP9	0.793648	0	-0.07879	0.828717	-2.91934	0.003508	#ERROR!
GALNT5	THAP9	0.631379	0	-0.39394	0.259998	-2.91933	0.003508	#ERROR!
KDM2A	THAP9	0.764493	0	-0.15152	0.676065	-2.918	0.003523	#ERROR!
EME1	THAP9	0.718341	0	-0.25	0.486034	-2.91799	0.003523	#ERROR!
PICALM	THAP9	0.810718	0	-0.0303	0.933773	-2.9175	0.003528	#ERROR!
DTL	THAP9	0.69264	0	-0.29697	0.404702	-2.91693	0.003535	#ERROR!
MGAM2	THAP9	0.368332	1.05e-06	-0.64848	0.04254	-2.91684	0.003536	#ERROR!
RASA4	THAP9	0.518398	8.44e-13	-0.52602	0.118345	-2.91583	0.003547	#ERROR!
RPL17P27	THAP9	-0.05753	0.461612	0.800909	0.005364	2.91574	0.003548	0/+
RNU6-748P	THAP9	0.2899	0.000152	-0.69631	0.025293	-2.9153	0.003553	#ERROR!
GPATCH1	THAP9	0.763988	0	-0.15152	0.676065	-2.91494	0.003558	#ERROR!
DDX6	THAP9	0.830155	0	0.030303	0.933773	-2.91471	0.00356	#ERROR!
HSD17B11	THAP9	0.82634	0	0.018182	0.96024	-2.91465	0.003561	#ERROR!
KLLN	THAP9	0.753367	0	-0.17576	0.627188	-2.91464	0.003561	#ERROR!
ARHGAP21	THAP9	0.747667	0	-0.18788	0.603218	-2.91335	0.003576	#ERROR!
GARS1	THAP9	0.758402	0	-0.16364	0.651477	-2.9128	0.003582	#ERROR!
GAK	THAP9	0.629662	0	-0.39394	0.259998	-2.91216	0.003589	#ERROR!
ELOVL6	THAP9	0.717961	0	-0.24848	0.488776	-2.91193	0.003592	#ERROR!
GGNBP1	THAP9	0.131757	0.090623	-0.77174	0.008923	-2.91172	0.003594	0/-
KRT20	THAP9	0.47683	8.33e-11	-0.56364	0.089724	-2.91143	0.003598	#ERROR!
PIP5K1B	THAP9	0.677238	0	-0.32121	0.365468	-2.91136	0.003599	#ERROR!
ATP6V1A	THAP9	0.758054	0	-0.16364	0.651477	-2.91074	0.003606	#ERROR!
NCKAP5	THAP9	0.572283	8.88e-16	-0.46667	0.173939	-2.91066	0.003607	#ERROR!
IQGAP1	THAP9	0.7471	0	-0.18788	0.603218	-2.91011	0.003613	#ERROR!
REPS1	THAP9	0.787557	0	-0.09091	0.802772	-2.90918	0.003624	#ERROR!
NAAA	THAP9	0.628727	0	-0.39394	0.259998	-2.90827	0.003634	#ERROR!
CTTNBP2NL	THAP9	0.767982	0	-0.13939	0.700932	-2.9081	0.003636	#ERROR!
BCL2L2-PABPN1	THAP9	0.672223	0	-0.32827	0.354418	-2.90805	0.003637	#ERROR!
RPL12P8	THAP9	0.212405	0.006007	0.87885	0.000812	2.90636	0.003657	#ERROR!
HBP1	THAP9	0.780141	0	0.975758	1.47e-06	2.90527	0.003669	#ERROR!
HARS2	THAP9	0.756874	0	-0.16413	0.650473	-2.90506	0.003672	#ERROR!
PRKCSH	THAP9	0.703732	0	-0.27273	0.445838	-2.905	0.003673	#ERROR!
CFAP44	THAP9	0.682989	0	-0.30909	0.384841	-2.90442	0.003679	#ERROR!
AP2B1	THAP9	0.746061	0	-0.18788	0.603218	-2.9042	0.003682	#ERROR!
PLEKHB2	THAP9	0.762079	0	-0.15152	0.676065	-2.90344	0.003691	#ERROR!
DGCR11	THAP9	0.696205	0	-0.28572	0.423568	-2.90331	0.003692	#ERROR!
KATNIP	THAP9	0.716271	0	-0.24848	0.488776	-2.90318	0.003694	#ERROR!
MTF2	THAP9	0.79121	0	-0.07879	0.828717	-2.90285	0.003698	#ERROR!
DCTN1	THAP9	0.703253	0	-0.27273	0.445838	-2.90261	0.003701	#ERROR!
MPP5	THAP9	0.756629	0	-0.16364	0.651477	-2.90233	0.003704	#ERROR!
AHCYL2	THAP9	0.473589	1.16e-10	-0.56364	0.089724	-2.9009	0.003721	#ERROR!
RNU6-695P	THAP9	0.526386	3.25e-13	-0.51322	0.129234	-2.89936	0.003739	#ERROR!
KSR1	THAP9	0.63501	0	-0.38182	0.276255	-2.89868	0.003747	#ERROR!
ARFGEF2	THAP9	0.799441	0	-0.05455	0.881036	-2.89794	0.003756	#ERROR!
RPL39P16	THAP9	0.717146	0	-0.24466	0.495709	-2.89746	0.003762	#ERROR!
HNRNPU	THAP9	0.771271	0	-0.12727	0.726057	-2.89735	0.003763	#ERROR!
EPAS1	THAP9	0.674138	0	-0.32121	0.365468	-2.897	0.003767	#ERROR!
MVP	THAP9	0.557942	5.77e-15	-0.47879	0.161523	-2.89691	0.003769	#ERROR!
CYTH2	THAP9	0.750128	0	-0.17576	0.627188	-2.8959	0.003781	#ERROR!
PLEKHG6	THAP9	0.578614	4.44e-16	-0.45455	0.186905	-2.89575	0.003782	#ERROR!
DNAJC5	THAP9	0.6256	0	-0.39394	0.259998	-2.8953	0.003788	#ERROR!
MACO1	THAP9	0.785403	0	-0.09091	0.802772	-2.89497	0.003792	#ERROR!
FAF2	THAP9	0.785334	0	-0.09091	0.802772	-2.89452	0.003797	#ERROR!
KIF1B	THAP9	0.755279	0	-0.16364	0.651477	-2.8944	0.003799	#ERROR!
BCLAF1	THAP9	0.807525	0	-0.0303	0.933773	-2.89423	0.003801	#ERROR!
B3GAT2	THAP9	0.701376	0	-0.27273	0.445838	-2.89329	0.003812	#ERROR!
POLR1G	THAP9	0.720411	0	-0.23636	0.510885	-2.8923	0.003824	#ERROR!
FOXJ3	THAP9	0.794178	0	-0.06667	0.854813	-2.89228	0.003825	#ERROR!
ANKH	THAP9	0.720406	0	-0.23636	0.510885	-2.89228	0.003825	#ERROR!
IGF2BP2	THAP9	0.749375	0	-0.17576	0.627188	-2.89157	0.003833	#ERROR!
CNOT6L	THAP9	0.88307	0	0.236364	0.510885	-2.8903	0.003849	#ERROR!
RGPD2	THAP9	0.518092	8.75e-13	-0.5183	0.124838	-2.88809	0.003876	#ERROR!
PPM1G	THAP9	0.725528	0	-0.22424	0.533401	-2.88707	0.003888	#ERROR!
LARP4	THAP9	0.793381	0	-0.06667	0.854813	-2.88686	0.003891	#ERROR!
ITFG1	THAP9	0.788784	0	-0.07879	0.828717	-2.88661	0.003894	#ERROR!
MTHFD1L	THAP9	0.682103	0	-0.30395	0.393201	-2.88598	0.003902	#ERROR!
CDK1	THAP9	0.731278	0	-0.21212	0.556306	-2.88587	0.003903	#ERROR!
OGA	THAP9	0.774209	0	-0.11515	0.75142	-2.88474	0.003917	#ERROR!
MIR6739	THAP9	0.462923	3.39e-10	-0.56854	0.086361	-2.88466	0.003918	#ERROR!
KPNA2	THAP9	0.69946	0	-0.27273	0.445838	-2.88383	0.003929	#ERROR!
KIF2A	THAP9	0.69946	0	-0.27273	0.445838	-2.88383	0.003929	#ERROR!
LEMD2	THAP9	0.736682	0	-0.2	0.579584	-2.88349	0.003933	#ERROR!
ACAT2	THAP9	0.685257	0	-0.29697	0.404702	-2.88156	0.003957	#ERROR!
ECT2	THAP9	0.692145	0	-0.28485	0.425038	-2.88122	0.003961	#ERROR!
FGD6	THAP9	0.741896	0	-0.18788	0.603218	-2.88073	0.003967	#ERROR!
PRPF40A	THAP9	0.801308	0	-0.04242	0.907364	-2.88044	0.003971	#ERROR!
RFFL	THAP9	0.787627	0	-0.07879	0.828717	-2.87892	0.00399	#ERROR!
REST	THAP9	0.843885	0	0.090909	0.802772	-2.87705	0.004014	#ERROR!
PTK2B	THAP9	0.602847	0	-0.41818	0.229113	-2.87639	0.004023	#ERROR!
PVT1	THAP9	0.620938	0	-0.39394	0.259998	-2.87611	0.004026	#ERROR!
EWSR1	THAP9	0.746651	0	-0.17576	0.627188	-2.87601	0.004027	#ERROR!
PAK1	THAP9	0.817334	0	0.006061	0.986743	-2.87533	0.004036	#ERROR!
GOLGA6L9	THAP9	0.728899	0	-0.21277	0.555076	-2.87475	0.004044	#ERROR!
CFL1	THAP9	0.716966	0	-0.23636	0.510885	-2.87437	0.004048	#ERROR!
RNU6ATAC27P	THAP9	0.274851	0.000339	-0.69631	0.025293	-2.87415	0.004051	#ERROR!
PPP1R11	THAP9	0.757057	0	-0.15152	0.676065	-2.87357	0.004059	#ERROR!
PHRF1	THAP9	0.751621	0	-0.16364	0.651477	-2.87311	0.004065	#ERROR!
ARHGEF12	THAP9	0.795795	0	-0.05455	0.881036	-2.87272	0.004069	#ERROR!
PATL1	THAP9	0.777077	0	-0.10303	0.776998	-2.87199	0.004079	#ERROR!
LRATD2	THAP9	0.716456	0	-0.23636	0.510885	-2.87173	0.004082	#ERROR!
APLP2	THAP9	0.804341	0	-0.0303	0.933773	-2.87138	0.004087	#ERROR!
RAB11FIP1	THAP9	0.675877	0	-0.30909	0.384841	-2.87118	0.004089	#ERROR!
RAB21	THAP9	0.781717	0	-0.09091	0.802772	-2.87095	0.004092	#ERROR!
ACTR3P2	THAP9	-0.43489	4.77e-09	0.588199	0.073681	2.87067	0.004096	-/0
LOC101927402	THAP9	0.728455	0	-0.21212	0.556306	-2.87066	0.004096	#ERROR!
FRMD8	THAP9	0.667849	0	-0.32121	0.365468	-2.86822	0.004128	#ERROR!
RPL31P34	THAP9	0.607096	0	-0.4098	0.23954	-2.86781	0.004133	#ERROR!
CXorf38	THAP9	0.82011	0	0.018182	0.96024	-2.86601	0.004157	#ERROR!
PDCD11	THAP9	0.715277	0	-0.23636	0.510885	-2.86564	0.004162	#ERROR!
PRELID2	THAP9	0.739148	0	-0.18788	0.603218	-2.86542	0.004165	#ERROR!
OXTR	THAP9	0.579298	4.44e-16	-0.44397	0.198672	-2.86499	0.00417	#ERROR!
PRSS37	THAP9	0.375436	6.22e-07	-0.63145	0.050214	-2.86496	0.004171	#ERROR!
GALNT10	THAP9	0.695556	0	-0.27273	0.445838	-2.8647	0.004174	#ERROR!
ERBB3	THAP9	0.775916	0	-0.10303	0.776998	-2.86463	0.004175	#ERROR!
PTPN1	THAP9	0.755476	0	-0.15152	0.676065	-2.86428	0.00418	#ERROR!
INPP4B	THAP9	0.780599	0	-0.09091	0.802772	-2.86373	0.004187	#ERROR!
ETFDH	THAP9	0.785266	0	-0.07879	0.828717	-2.86335	0.004192	#ERROR!
RAD54L	THAP9	0.658899	0	-0.33333	0.346594	-2.86216	0.004208	#ERROR!
NEK2	THAP9	0.74405	0	-0.17576	0.627188	-2.86129	0.004219	#ERROR!
RIPK3	THAP9	0.658623	0	-0.33333	0.346594	-2.86093	0.004224	#ERROR!
ALMS1	THAP9	0.798369	0	-0.04242	0.907364	-2.85992	0.004238	#ERROR!
ANKLE2	THAP9	0.749314	0	-0.16364	0.651477	-2.85982	0.004239	#ERROR!
GSK3A	THAP9	0.726124	0	-0.21212	0.556306	-2.85821	0.00426	#ERROR!
EMP1	THAP9	0.568518	1.33e-15	-0.45455	0.186905	-2.85789	0.004265	#ERROR!
ODF2	THAP9	0.719976	0	-0.22424	0.533401	-2.85782	0.004266	#ERROR!
MCM3AP-AS1	THAP9	0.748922	0	-0.16364	0.651477	-2.85757	0.004269	#ERROR!
MSH6	THAP9	0.806453	0	-0.01818	0.96024	-2.85598	0.00429	#ERROR!
FDPS	THAP9	0.693568	0	-0.27273	0.445838	-2.85503	0.004303	#ERROR!
INHBC	THAP9	0.383979	3.27e-07	-0.6228	0.054439	-2.85422	0.004314	#ERROR!
NCOA6	THAP9	0.774255	0	-0.10303	0.776998	-2.85416	0.004315	#ERROR!
IGLVI-63	THAP9	-0.26882	0.000462	0.695135	0.025647	2.85205	0.004344	-/+
PUS10	THAP9	0.825913	0	0.042424	0.907364	-2.85021	0.004369	#ERROR!
DDB1	THAP9	0.787855	0	-0.06667	0.854813	-2.84977	0.004375	#ERROR!
MTCO1P22	THAP9	0.475578	9.48e-11	-0.54776	0.101196	-2.84954	0.004378	#ERROR!
LIMA1	THAP9	0.692281	0	-0.27273	0.445838	-2.8488	0.004388	#ERROR!
PI4K2A	THAP9	0.730297	0	-0.2	0.579584	-2.84872	0.00439	#ERROR!
LRBA	THAP9	0.825688	0	0.042424	0.907364	-2.84843	0.004394	#ERROR!
KPNA6	THAP9	0.792135	0	-0.05455	0.881036	-2.84781	0.004402	#ERROR!
FAM135A	THAP9	0.78736	0	-0.06667	0.854813	-2.84649	0.00442	#ERROR!
ITPRID2	THAP9	0.767996	0	-0.11515	0.75142	-2.84618	0.004425	#ERROR!
PARP12	THAP9	0.604342	0	-0.40606	0.244282	-2.84556	0.004433	#ERROR!
KIAA0232	THAP9	0.796256	0	-0.04242	0.907364	-2.84532	0.004437	#ERROR!
CHMP4B	THAP9	0.74116	0	-0.17576	0.627188	-2.84507	0.00444	#ERROR!
CROT	THAP9	0.757432	0	-0.13939	0.700932	-2.84462	0.004446	#ERROR!
NORAD	THAP9	0.8048	0	-0.01818	0.96024	-2.84413	0.004453	#ERROR!
GGA2	THAP9	0.767638	0	-0.11515	0.75142	-2.84398	0.004455	#ERROR!
GSK3B	THAP9	0.777365	0	-0.09091	0.802772	-2.84303	0.004469	#ERROR!
CAPRIN1	THAP9	0.812879	0	0.006061	0.986743	-2.84192	0.004484	#ERROR!
GOT1	THAP9	0.704181	0	-0.24848	0.488776	-2.84179	0.004486	#ERROR!
ERI1	THAP9	0.661836	0	-0.32121	0.365468	-2.8411	0.004496	#ERROR!
LYAR	THAP9	0.804289	0	-0.01818	0.96024	-2.84049	0.004504	#ERROR!
CAP1	THAP9	0.740255	0	-0.17576	0.627188	-2.84003	0.004511	#ERROR!
NUF2	THAP9	0.753747	0	-0.1459	0.687557	-2.83972	0.004515	#ERROR!
KCNG3	THAP9	0.376772	5.64e-07	-0.62424	0.053718	-2.83896	0.004526	#ERROR!
FBXL20	THAP9	0.781492	0	-0.07879	0.828717	-2.83876	0.004529	#ERROR!
CA13	THAP9	0.602521	0	-0.40606	0.244282	-2.83836	0.004535	#ERROR!
IRF6	THAP9	0.734094	0	-0.18788	0.603218	-2.83762	0.004545	#ERROR!
NKRF	THAP9	0.80385	0	-0.01818	0.96024	-2.83735	0.004549	#ERROR!
LOC100288846	THAP9	0.131956	0.090131	0.851068	0.001791	2.8366	0.00456	0/+
PKN2	THAP9	0.824168	0	0.042424	0.907364	-2.83646	0.004562	#ERROR!
PLD1	THAP9	0.645116	0	-0.34545	0.328227	-2.83629	0.004564	#ERROR!
MAP2K3	THAP9	0.675419	0	-0.29697	0.404702	-2.83547	0.004576	#ERROR!
MTIF2	THAP9	0.831655	0	0.066667	0.854813	-2.83517	0.00458	#ERROR!
RPL5P17	THAP9	-0.33373	1.11e-05	0.652385	0.040902	2.83453	0.004589	-/+
PAFAH1B1	THAP9	0.780802	0	-0.07879	0.828717	-2.83431	0.004592	#ERROR!
MIR3131	THAP9	0.557113	6.44e-15	-0.46016	0.180833	-2.83374	0.004601	#ERROR!
CHD7	THAP9	0.765866	0	-0.11515	0.75142	-2.83316	0.004609	#ERROR!
LOC220729	THAP9	0.74988	0	-0.15152	0.676065	-2.83179	0.004629	#ERROR!
LIPH	THAP9	0.600824	0	-0.40606	0.244282	-2.83167	0.004631	#ERROR!
MIR4664	THAP9	0.49984	7.08e-12	-0.5199	0.123476	-2.8316	0.004632	#ERROR!
NDUFS1	THAP9	0.785052	0	-0.06667	0.854813	-2.83128	0.004636	#ERROR!
RNFT2	THAP9	0.374142	6.85e-07	-0.62424	0.053718	-2.83125	0.004637	#ERROR!
RPL32P18	THAP9	-0.07462	0.33936	0.781818	0.007547	2.83032	0.00465	0/+
HHLA2	THAP9	0.436986	3.95e-09	-0.57576	0.081553	-2.82983	0.004657	#ERROR!
LRRC37A	THAP9	0.600277	0	-0.40606	0.244282	-2.82951	0.004662	#ERROR!
BCL7A	THAP9	0.738183	0	-0.17576	0.627188	-2.82854	0.004676	#ERROR!
GMEB1	THAP9	0.779883	0	-0.07879	0.828717	-2.8284	0.004678	#ERROR!
RBM26	THAP9	0.784486	0	-0.06687	0.854375	-2.82809	0.004683	#ERROR!
AP3B1	THAP9	0.764995	0	-0.11515	0.75142	-2.82787	0.004686	#ERROR!
AKR7L	THAP9	0.421302	1.58e-08	-0.58788	0.073878	-2.82757	0.00469	#ERROR!
MXD1	THAP9	0.570544	8.88e-16	-0.44242	0.200423	-2.82726	0.004695	#ERROR!
IDE	THAP9	0.759741	0	-0.12727	0.726057	-2.82726	0.004695	#ERROR!
MTCO1P12	THAP9	0.626406	0	-0.3697	0.29305	-2.82721	0.004696	#ERROR!
HTATSF1	THAP9	0.806641	0	-0.00606	0.986743	-2.82683	0.004701	#ERROR!
CDK5R1	THAP9	0.658616	0	-0.32121	0.365468	-2.82674	0.004702	#ERROR!
GTPBP1	THAP9	0.694121	0	-0.26061	0.467089	-2.82488	0.00473	#ERROR!
MYO1D	THAP9	0.700688	0	-0.24848	0.488776	-2.82444	0.004736	#ERROR!
CDC6	THAP9	0.687201	0	-0.27273	0.445838	-2.82442	0.004737	#ERROR!
GPI	THAP9	0.642338	0	-0.34545	0.328227	-2.82436	0.004738	#ERROR!
ATP8A1	THAP9	0.642317	0	-0.34545	0.328227	-2.82427	0.004739	#ERROR!
ARHGEF35	THAP9	0.687154	0	-0.27273	0.445838	-2.82419	0.00474	#ERROR!
ARF6	THAP9	0.713461	0	-0.22424	0.533401	-2.8241	0.004741	#ERROR!
DDX54	THAP9	0.707049	0	-0.23636	0.510885	-2.82375	0.004746	#ERROR!
HMGB2	THAP9	0.801855	0	-0.01818	0.96024	-2.82323	0.004754	#ERROR!
AMACR	THAP9	0.641979	0	-0.34545	0.328227	-2.82282	0.00476	#ERROR!
LRRFIP2	THAP9	0.758857	0	-0.12727	0.726057	-2.822	0.004772	#ERROR!
CNTRL	THAP9	0.764023	0	-0.11515	0.75142	-2.82198	0.004773	#ERROR!
NIPA2	THAP9	0.706661	0	-0.23636	0.510885	-2.8218	0.004775	#ERROR!
NUFIP2	THAP9	0.810105	0	0.006061	0.986743	-2.82148	0.00478	#ERROR!
LOC345471	THAP9	-0.51886	7.99e-13	0.497468	0.143461	2.82008	0.004801	-/0
KRT18P34	THAP9	0.501209	6.08e-12	-0.51515	0.127553	-2.81988	0.004804	#ERROR!
ICMT	THAP9	0.736483	0	-0.17576	0.627188	-2.81916	0.004815	#ERROR!
NSUN2	THAP9	0.747539	0	-0.15152	0.676065	-2.81839	0.004827	#ERROR!
PLXNA2	THAP9	0.615554	0	-0.38182	0.276255	-2.81828	0.004828	#ERROR!
AREL1	THAP9	0.69266	0	-0.26061	0.467089	-2.8178	0.004835	#ERROR!
DOLPP1	THAP9	0.623981	0	-0.3697	0.29305	-2.81719	0.004845	#ERROR!
CENATAC	THAP9	0.692516	0	-0.26061	0.467089	-2.8171	0.004846	#ERROR!
RNF4	THAP9	0.773245	0	-0.09091	0.802772	-2.81704	0.004847	#ERROR!
NEK5	THAP9	0.581669	2.22e-16	-0.42553	0.220179	-2.8168	0.004851	#ERROR!
HNRNPK	THAP9	0.809426	0	0.006061	0.986743	-2.81652	0.004855	#ERROR!
DNMBP	THAP9	0.773103	0	-0.09091	0.802772	-2.81615	0.00486	#ERROR!
EIF2AK3	THAP9	0.796455	0	-0.0303	0.933773	-2.81615	0.00486	#ERROR!
PSME3	THAP9	0.773057	0	-0.09091	0.802772	-2.81586	0.004865	#ERROR!
BORA	THAP9	0.685171	0	-0.27273	0.445838	-2.81476	0.004881	#ERROR!
MYO10	THAP9	0.741338	0	-0.16364	0.651477	-2.81466	0.004883	#ERROR!
LOC100289350	THAP9	0.323438	2.13e-05	-0.65443	0.040059	-2.81449	0.004885	#ERROR!
FBXO34	THAP9	0.729688	0	-0.18788	0.603218	-2.81374	0.004897	#ERROR!
LINC00852	THAP9	0.566552	1.78e-15	-0.44242	0.200423	-2.81241	0.004917	#ERROR!
NAF1	THAP9	0.85719	0	0.163636	0.651477	-2.81206	0.004922	#ERROR!
RNU2-51P	THAP9	0.396601	1.22e-07	-0.60302	0.064969	-2.81197	0.004924	#ERROR!
DDX3X	THAP9	0.8129	0	0.018182	0.96024	-2.81157	0.00493	#ERROR!
BPNT2	THAP9	0.81286	0	0.018182	0.96024	-2.81128	0.004935	#ERROR!
CRYBG1	THAP9	0.670032	0	-0.29697	0.404702	-2.81071	0.004943	#ERROR!
FANCF	THAP9	0.8698	0	0.212121	0.556306	-2.81039	0.004948	#ERROR!
RAB5A	THAP9	0.777035	0	-0.07879	0.828717	-2.81021	0.004951	#ERROR!
PPY	THAP9	-0.0282	0.718352	0.796356	0.005837	2.81017	0.004952	0/+
COG7	THAP9	0.728987	0	-0.18788	0.603218	-2.80997	0.004955	#ERROR!
FAM72B	THAP9	0.463971	3.06e-10	-0.54711	0.101678	-2.80976	0.004958	#ERROR!
ATP6V1D	THAP9	0.745992	0	-0.15152	0.676065	-2.80959	0.004961	#ERROR!
EPS8L3	THAP9	0.613313	0	-0.38182	0.276255	-2.80922	0.004966	#ERROR!
KBTBD2	THAP9	0.816644	0	0.030303	0.933773	-2.80908	0.004968	#ERROR!
HS6ST1	THAP9	0.704085	0	-0.23636	0.510885	-2.8089	0.004971	#ERROR!
NGLY1	THAP9	0.824524	0	0.054545	0.881036	-2.80868	0.004974	#ERROR!
DBF4	THAP9	0.828363	0	0.066667	0.854813	-2.80854	0.004977	#ERROR!
MRPL20-AS1	THAP9	0.751237	0	-0.13939	0.700932	-2.80845	0.004978	#ERROR!
CEACAM22P	THAP9	0.261731	0.000659	-0.69007	0.027209	-2.80833	0.00498	#ERROR!
MIDN	THAP9	0.565316	2.22e-15	-0.44242	0.200423	-2.80784	0.004988	#ERROR!
ATP4A	THAP9	0.20043	0.009621	-0.72223	0.018329	-2.80687	0.005003	#ERROR!
GALNT12	THAP9	0.646235	0	-0.33333	0.346594	-2.80665	0.005006	#ERROR!
CCAR2	THAP9	0.676106	0	-0.28485	0.425038	-2.80533	0.005026	#ERROR!
MDM4	THAP9	0.637836	0	-0.34545	0.328227	-2.80517	0.005029	#ERROR!
FARP2	THAP9	0.739421	0	-0.16364	0.651477	-2.80398	0.005048	#ERROR!
MSH2	THAP9	0.79455	0	-0.0303	0.933773	-2.80309	0.005062	#ERROR!
ADNP	THAP9	0.811679	0	0.018182	0.96024	-2.80254	0.00507	#ERROR!
EQTN	THAP9	0.422415	1.44e-08	-0.58035	0.078589	-2.8022	0.005075	#ERROR!
GGNBP2	THAP9	0.823698	0	0.054545	0.881036	-2.8022	0.005075	#ERROR!
KRT18P4	THAP9	0.444651	1.95e-09	-0.56182	0.090989	-2.80194	0.00508	#ERROR!
MFSD11	THAP9	0.807384	0	0.006061	0.986743	-2.80169	0.005084	#ERROR!
NEMP1	THAP9	0.78274	0	-0.06079	0.867511	-2.80135	0.005089	#ERROR!
PUS7	THAP9	0.815597	0	0.030303	0.933773	-2.80119	0.005091	#ERROR!
EGLN3	THAP9	0.442102	2.47e-09	-0.56364	0.089724	-2.80063	0.0051	#ERROR!
DLG1	THAP9	0.789634	0	-0.04242	0.907364	-2.80043	0.005103	#ERROR!
NEDD4L	THAP9	0.749753	0	-0.13939	0.700932	-2.7999	0.005112	#ERROR!
CNOT10	THAP9	0.780104	0	-0.06667	0.854813	-2.79916	0.005124	#ERROR!
HMCES	THAP9	0.760191	0	-0.11515	0.75142	-2.79898	0.005126	#ERROR!
MCUR1	THAP9	0.744066	0	-0.15152	0.676065	-2.79869	0.005131	#ERROR!
CERS6	THAP9	0.793857	0	-0.0303	0.933773	-2.79837	0.005136	#ERROR!
LINC00562	THAP9	0.545586	2.93e-14	-0.46201	0.178857	-2.79799	0.005142	#ERROR!
LINC01176	THAP9	0.59576	0	-0.40122	0.250496	-2.79726	0.005154	#ERROR!
EXO1	THAP9	0.65189	0	-0.32121	0.365468	-2.79708	0.005157	#ERROR!
GPAT4	THAP9	0.738071	0	-0.16364	0.651477	-2.79651	0.005166	#ERROR!
RAD21	THAP9	0.826811	0	0.066667	0.854813	-2.79615	0.005172	#ERROR!
PIGX	THAP9	0.79785	0	-0.01818	0.96024	-2.79526	0.005186	#ERROR!
KCMF1	THAP9	0.814767	0	0.030303	0.933773	-2.79496	0.005191	#ERROR!
PAXIP1	THAP9	0.759414	0	-0.11515	0.75142	-2.79436	0.0052	#ERROR!
MASP2	THAP9	0.510184	2.2e-12	-0.49848	0.142518	-2.79378	0.00521	#ERROR!
KDM6A	THAP9	0.774223	0	-0.07879	0.828717	-2.79245	0.005231	#ERROR!
CKAP5	THAP9	0.78355	0	-0.05455	0.881036	-2.79085	0.005257	#ERROR!
ERCC5	THAP9	0.706846	0	-0.22424	0.533401	-2.79052	0.005262	#ERROR!
NDC1	THAP9	0.742565	0	-0.15152	0.676065	-2.79025	0.005267	#ERROR!
PRDM10	THAP9	0.763878	0	-0.10303	0.776998	-2.79024	0.005267	#ERROR!
CPSF3	THAP9	0.814121	0	0.030303	0.933773	-2.79014	0.005269	#ERROR!
QTRT2	THAP9	0.768796	0	-0.09091	0.802772	-2.78943	0.00528	#ERROR!
OLIG2	THAP9	-0.05726	0.463672	0.782275	0.007488	2.78942	0.00528	0/+
ACTR3	THAP9	0.773598	0	-0.07879	0.828717	-2.78853	0.005295	#ERROR!
RANBP2	THAP9	0.778268	0	-0.06667	0.854813	-2.7874	0.005313	#ERROR!
CNPPD1	THAP9	0.706187	0	-0.22424	0.533401	-2.78721	0.005316	#ERROR!
GPR119	THAP9	0.173259	0.025593	0.857147	0.001528	2.78673	0.005324	#ERROR!
RNU6-1337P	THAP9	0.303453	7.06e-05	-0.66058	0.037599	-2.78596	0.005337	#ERROR!
NBPF25P	THAP9	0.787241	0	-0.04242	0.907364	-2.78451	0.005361	#ERROR!
PAPSS2	THAP9	0.53759	8.13e-14	-0.46667	0.173939	-2.78446	0.005362	#ERROR!
RNU6-610P	THAP9	0.547281	2.35e-14	-0.45571	0.185636	-2.78399	0.005369	#ERROR!
BICDL1	THAP9	0.525765	3.5e-13	-0.47879	0.161523	-2.78225	0.005398	#ERROR!
RNU6-770P	THAP9	0.240498	0.001802	-0.69631	0.025293	-2.78155	0.00541	#ERROR!
PARP1	THAP9	0.757186	0	-0.11515	0.75142	-2.78116	0.005416	#ERROR!
DHX29	THAP9	0.777274	0	-0.06667	0.854813	-2.78106	0.005418	#ERROR!
NBPF19	THAP9	0.740919	0	-0.15152	0.676065	-2.78105	0.005418	#ERROR!
GFPT1	THAP9	0.762273	0	-0.10303	0.776998	-2.78057	0.005426	#ERROR!
RASEF	THAP9	0.684771	0	-0.26061	0.467089	-2.78003	0.005435	#ERROR!
MED26	THAP9	0.74618	0	-0.13939	0.700932	-2.7795	0.005444	#ERROR!
ARF3	THAP9	0.734824	0	-0.16364	0.651477	-2.77866	0.005458	#ERROR!
PIK3CB	THAP9	0.761939	0	-0.10303	0.776998	-2.77857	0.00546	#ERROR!
PLEKHA8	THAP9	0.795401	0	-0.01818	0.96024	-2.77839	0.005463	#ERROR!
RPL13AP22	THAP9	0.48895	2.33e-11	0.927273	0.000112	2.77775	0.005474	#ERROR!
CTTN	THAP9	0.734568	0	-0.16364	0.651477	-2.77726	0.005482	#ERROR!
PXN	THAP9	0.734546	0	-0.16364	0.651477	-2.77714	0.005484	#ERROR!
FOXO3	THAP9	0.751184	0	-0.12727	0.726057	-2.77709	0.005485	#ERROR!
ALDH2	THAP9	0.761594	0	-0.10303	0.776998	-2.7765	0.005495	#ERROR!
RELCH	THAP9	0.785931	0	-0.04242	0.907364	-2.77587	0.005505	#ERROR!
ABCF2	THAP9	0.728424	0	-0.17576	0.627188	-2.77541	0.005513	#ERROR!
OR2A7	THAP9	0.638934	0	-0.33333	0.346594	-2.77536	0.005514	#ERROR!
HDGF	THAP9	0.722356	0	-0.18788	0.603218	-2.77472	0.005525	#ERROR!
C6orf47	THAP9	0.733992	0	-0.16364	0.651477	-2.77411	0.005535	#ERROR!
FAM83G	THAP9	0.683412	0	-0.26061	0.467089	-2.7736	0.005544	#ERROR!
RN7SL236P	THAP9	0.193642	0.012428	-0.71915	0.019077	-2.77296	0.005555	#ERROR!
GK5	THAP9	0.750388	0	-0.12727	0.726057	-2.7725	0.005563	#ERROR!
RBM45	THAP9	0.811728	0	0.030303	0.933773	-2.77238	0.005565	#ERROR!
ACACA	THAP9	0.696574	0	-0.23636	0.510885	-2.77181	0.005575	#ERROR!
CCDC137	THAP9	0.703051	0	-0.22424	0.533401	-2.77154	0.005579	#ERROR!
LRRC8B	THAP9	0.807387	0	0.018182	0.96024	-2.7712	0.005585	#ERROR!
PEX1	THAP9	0.842324	0	0.127273	0.726057	-2.77085	0.005591	#ERROR!
AGAP6	THAP9	0.621064	0	-0.35758	0.310376	-2.77006	0.005605	#ERROR!
GOLGA8IP	THAP9	0.30328	7.13e-05	0.888235	0.000595	2.76888	0.005625	#ERROR!
ATR	THAP9	0.78946	0	-0.0303	0.933773	-2.76873	0.005628	#ERROR!
RCAN3	THAP9	0.793978	0	-0.01818	0.96024	-2.76867	0.005628	#ERROR!
DNAJC2	THAP9	0.784803	0	-0.04242	0.907364	-2.76846	0.005632	#ERROR!
H3-3B	THAP9	0.775224	0	-0.06667	0.854813	-2.76808	0.005639	#ERROR!
LCLAT1	THAP9	0.779872	0	-0.05455	0.881036	-2.76705	0.005657	#ERROR!
LNPEP	THAP9	0.779826	0	-0.05455	0.881036	-2.76676	0.005662	#ERROR!
LOC101927124	THAP9	0.693475	0	-0.24003	0.504157	-2.7665	0.005666	#ERROR!
DHX9	THAP9	0.784433	0	-0.04242	0.907364	-2.76604	0.005674	#ERROR!
ASCC3	THAP9	0.754609	0	-0.11515	0.75142	-2.76604	0.005674	#ERROR!
LOC728975	THAP9	0.6114	0	-0.3697	0.29305	-2.766	0.005675	#ERROR!
LRRC66	THAP9	0.497109	9.58e-12	-0.50303	0.138334	-2.76496	0.005693	#ERROR!
PC	THAP9	0.531767	1.68e-13	-0.46667	0.173939	-2.76394	0.005711	#ERROR!
LOC100422687	THAP9	0.565931	1.78e-15	-0.42734	0.21801	-2.76332	0.005722	#ERROR!
RNU4-47P	THAP9	0.585849	0	-0.40245	0.248911	-2.76263	0.005734	#ERROR!
RNF213	THAP9	0.659362	0	-0.29697	0.404702	-2.76261	0.005734	#ERROR!
NBAS	THAP9	0.793008	0	-0.01818	0.96024	-2.76208	0.005743	#ERROR!
RNF6	THAP9	0.748417	0	-0.12727	0.726057	-2.76119	0.005759	#ERROR!
PTP4A2	THAP9	0.801583	0	0.006061	0.986743	-2.76031	0.005775	#ERROR!
DDX60L	THAP9	0.753574	0	-0.11515	0.75142	-2.76	0.00578	#ERROR!
RPL10P2	THAP9	0.14451	0.063229	0.846121	0.002028	2.75992	0.005782	0/+
RNF144A	THAP9	0.626778	0	-0.34545	0.328227	-2.7588	0.005801	#ERROR!
OSBP	THAP9	0.809872	0	0.030303	0.933773	-2.75875	0.005802	#ERROR!
RPL18P13	THAP9	-0.65382	0	0.304096	0.392967	2.75781	0.005819	-/0
CCNL1	THAP9	0.787805	0	-0.0303	0.933773	-2.75771	0.005821	#ERROR!
PUDP	THAP9	0.626442	0	-0.34545	0.328227	-2.75741	0.005826	#ERROR!
CHEK1	THAP9	0.763503	0	-0.09091	0.802772	-2.75718	0.00583	#ERROR!
GMPS	THAP9	0.792246	0	-0.01818	0.96024	-2.75692	0.005835	#ERROR!
CCDC194	THAP9	0.203967	0.008393	-0.71067	0.021244	-2.75638	0.005845	#ERROR!
CNTN4	THAP9	0.665388	0	-0.28485	0.425038	-2.7563	0.005846	#ERROR!
OGFOD1	THAP9	0.804941	0	0.018182	0.96024	-2.75362	0.005894	#ERROR!
CEMIP	THAP9	0.505709	3.66e-12	-0.49091	0.149656	-2.75337	0.005899	#ERROR!
HLA-L	THAP9	-0.31079	4.59e-05	0.648485	0.04254	2.75311	0.005903	-/+
C11orf24	THAP9	0.641726	0	-0.32121	0.365468	-2.7531	0.005903	#ERROR!
ETS1	THAP9	0.711871	0	-0.2	0.579584	-2.75209	0.005922	#ERROR!
LINC01016	THAP9	0.335492	9.93e-06	-0.63195	0.049975	-2.75199	0.005923	#ERROR!
AACS	THAP9	0.624945	0	-0.34545	0.328227	-2.75122	0.005937	#ERROR!
FAM72C	THAP9	0.613727	0	-0.36087	0.305613	-2.74975	0.005964	#ERROR!
KIAA1841	THAP9	0.804276	0	0.018182	0.96024	-2.74888	0.00598	#ERROR!
PITRM1	THAP9	0.772078	0	-0.06667	0.854813	-2.74837	0.005989	#ERROR!
KIF24	THAP9	0.615504	0	-0.35758	0.310376	-2.74741	0.006007	#ERROR!
LINC01559	THAP9	0.578995	4.44e-16	-0.40606	0.244282	-2.7474	0.006007	#ERROR!
OR10Y1P	THAP9	-0.02945	0.706409	0.786567	0.006954	2.74737	0.006007	0/+
FAM168B	THAP9	0.761776	0	-0.09091	0.802772	-2.74679	0.006018	#ERROR!
NFKB1	THAP9	0.786045	0	-0.0303	0.933773	-2.74608	0.006031	#ERROR!
DUTP6	THAP9	0.608577	0	-0.36586	0.298477	-2.74353	0.006078	#ERROR!
LRRK1	THAP9	0.710183	0	-0.2	0.579584	-2.74351	0.006079	#ERROR!
IFNLR1	THAP9	0.722375	0	-0.17576	0.627188	-2.74328	0.006083	#ERROR!
INTS4	THAP9	0.827868	0	0.090909	0.802772	-2.74319	0.006084	#ERROR!
PIK3R4	THAP9	0.790168	0	-0.01818	0.96024	-2.74294	0.006089	#ERROR!
ELF4	THAP9	0.669671	0	-0.27273	0.445838	-2.74267	0.006094	#ERROR!
CHAF1A	THAP9	0.596471	0	-0.38182	0.276255	-2.74238	0.0061	#ERROR!
RPS10P4	THAP9	0.37635	5.82e-07	0.902456	0.000352	2.74152	0.006116	#ERROR!
COPG1	THAP9	0.715931	0	-0.18788	0.603218	-2.74123	0.006121	#ERROR!
DHRS4L2	THAP9	0.622496	0	-0.34545	0.328227	-2.74113	0.006123	#ERROR!
AMMECR1	THAP9	0.770869	0	-0.06667	0.854813	-2.74085	0.006128	#ERROR!
RBM6	THAP9	0.744819	0	-0.12727	0.726057	-2.74073	0.00613	#ERROR!
MOGAT3	THAP9	0.489758	2.13e-11	-0.50303	0.138334	-2.74051	0.006134	#ERROR!
CTCF	THAP9	0.765707	0	-0.07879	0.828717	-2.73981	0.006147	#ERROR!
LRP8	THAP9	0.576965	4.44e-16	-0.40606	0.244282	-2.73973	0.006149	#ERROR!
ABHD2	THAP9	0.604716	0	-0.3697	0.29305	-2.73932	0.006157	#ERROR!
MIRLET7D	THAP9	0.479893	6.07e-11	-0.5122	0.130124	-2.73916	0.00616	#ERROR!
NET1	THAP9	0.770529	0	-0.06667	0.854813	-2.73874	0.006167	#ERROR!
EPB41	THAP9	0.798484	0	0.006061	0.986743	-2.73865	0.006169	#ERROR!
CSNK1D	THAP9	0.721338	0	-0.17576	0.627188	-2.73783	0.006185	#ERROR!
LRP4	THAP9	0.476312	8.79e-11	-0.51515	0.127553	-2.73755	0.00619	#ERROR!
RASAL2	THAP9	0.738667	0	-0.13939	0.700932	-2.73737	0.006193	#ERROR!
EIF4G1	THAP9	0.689196	0	-0.23636	0.510885	-2.7361	0.006217	#ERROR!
ADM2	THAP9	0.488316	2.49e-11	-0.50303	0.138334	-2.73574	0.006224	#ERROR!
EMC1	THAP9	0.74393	0	-0.12727	0.726057	-2.73572	0.006224	#ERROR!
LINC01963	THAP9	0.594611	0	-0.38182	0.276255	-2.73513	0.006236	#ERROR!
ABCF3	THAP9	0.726687	0	-0.16364	0.651477	-2.73471	0.006243	#ERROR!
LOC101928988	THAP9	0.498053	8.63e-12	-0.49237	0.148266	-2.73245	0.006287	#ERROR!
LINC01115	THAP9	0.22187	0.004067	-0.69631	0.025293	-2.73203	0.006295	#ERROR!
CCDC96	THAP9	0.688279	0	-0.23636	0.510885	-2.73171	0.006301	#ERROR!
RANGAP1	THAP9	0.619991	0	-0.34545	0.328227	-2.73087	0.006317	#ERROR!
NAA40	THAP9	0.748364	0	-0.11515	0.75142	-2.72993	0.006335	#ERROR!
CIRBP-AS1	THAP9	0.564265	2.44e-15	-0.41818	0.229113	-2.72908	0.006351	#ERROR!
CDK3	THAP9	0.567839	1.33e-15	-0.41365	0.234719	-2.72853	0.006362	#ERROR!
MAPRE1	THAP9	0.801399	0	0.018182	0.96024	-2.72851	0.006362	#ERROR!
CYP4V2	THAP9	0.76874	0	-0.06667	0.854813	-2.7277	0.006378	#ERROR!
EXOSC10	THAP9	0.801215	0	0.018182	0.96024	-2.72721	0.006387	#ERROR!
EEF1A1P8	THAP9	0.287228	0.000175	0.880771	0.000764	2.72682	0.006395	#ERROR!
CD99P1	THAP9	0.687248	0	-0.23636	0.510885	-2.72679	0.006395	#ERROR!
FLCN	THAP9	0.736701	0	-0.13939	0.700932	-2.72651	0.006401	#ERROR!
DPAGT1	THAP9	0.758327	0	-0.09091	0.802772	-2.72624	0.006406	#ERROR!
NF1	THAP9	0.792214	0	-0.00606	0.986743	-2.7262	0.006407	#ERROR!
AFP	THAP9	0.436075	4.29e-09	-0.54834	0.100756	-2.72614	0.006408	#ERROR!
RGPD3	THAP9	0.566015	1.78e-15	-0.41496	0.233094	-2.72574	0.006416	#ERROR!
BRCC3	THAP9	0.821748	0	0.078788	0.828717	-2.72574	0.006416	#ERROR!
RBM28	THAP9	0.773345	0	-0.05455	0.881036	-2.72567	0.006417	#ERROR!
BLOC1S3	THAP9	0.627011	0	-0.33333	0.346594	-2.72529	0.006424	#ERROR!
FANCB	THAP9	0.741894	0	-0.12766	0.72525	-2.72527	0.006425	#ERROR!
ELP1	THAP9	0.787397	0	-0.01818	0.96024	-2.72449	0.00644	#ERROR!
MIS18BP1	THAP9	0.757939	0	-0.09091	0.802772	-2.72395	0.006451	#ERROR!
RCC2	THAP9	0.730511	0	-0.15152	0.676065	-2.72395	0.006451	#ERROR!
NFE2L1	THAP9	0.757834	0	-0.09091	0.802772	-2.72333	0.006463	#ERROR!
KRT16P6	THAP9	0.110978	0.154606	-0.74903	0.012657	-2.72308	0.006468	0/-
ASCC2	THAP9	0.672544	0	-0.26061	0.467089	-2.72299	0.006469	#ERROR!
GRIPAP1	THAP9	0.762897	0	-0.07879	0.828717	-2.72281	0.006473	#ERROR!
LOC100132723	THAP9	0.218234	0.004733	-0.69631	0.025293	-2.72241	0.006481	#ERROR!
HNF4G	THAP9	0.800494	0	0.018182	0.96024	-2.72216	0.006486	#ERROR!
ABCF1	THAP9	0.692888	0	-0.22424	0.533401	-2.72167	0.006495	#ERROR!
PRR11	THAP9	0.730058	0	-0.15152	0.676065	-2.7215	0.006499	#ERROR!
ADCY9	THAP9	0.581579	2.22e-16	-0.39394	0.259998	-2.72089	0.006511	#ERROR!
MAPKAPK5	THAP9	0.854167	0	0.187879	0.603218	-2.72071	0.006514	#ERROR!
PITPNA	THAP9	0.729656	0	-0.15152	0.676065	-2.71934	0.006541	#ERROR!
BIRC3	THAP9	0.688615	0	-0.231	0.520792	-2.71905	0.006547	#ERROR!
PLEKHG1	THAP9	0.685599	0	-0.23636	0.510885	-2.71894	0.006549	#ERROR!
MTFR2	THAP9	0.707985	0	-0.19453	0.590207	-2.71806	0.006567	#ERROR!
AKAP13	THAP9	0.698608	0	-0.21212	0.556306	-2.71754	0.006577	#ERROR!
RBM27	THAP9	0.790828	0	-0.00606	0.986743	-2.71686	0.00659	#ERROR!
DDX46	THAP9	0.781529	0	-0.0303	0.933773	-2.71662	0.006595	#ERROR!
CASK	THAP9	0.803908	0	0.030303	0.933773	-2.71574	0.006613	#ERROR!
MYBL1	THAP9	0.734733	0	-0.13939	0.700932	-2.71572	0.006613	#ERROR!
CCAR1	THAP9	0.808149	0	0.042424	0.907364	-2.71566	0.006614	#ERROR!
GCC2	THAP9	0.790613	0	-0.00606	0.986743	-2.71542	0.006619	#ERROR!
NR3C2	THAP9	0.494229	1.31e-11	-0.49091	0.149656	-2.71485	0.006631	#ERROR!
ALG9	THAP9	0.843034	0	0.151515	0.676065	-2.7148	0.006632	#ERROR!
CASP7	THAP9	0.728666	0	-0.15152	0.676065	-2.71402	0.006647	#ERROR!
PSMB2	THAP9	0.74002	0	-0.12727	0.726057	-2.71382	0.006651	#ERROR!
PTPRE	THAP9	0.722722	0	-0.16364	0.651477	-2.7137	0.006654	#ERROR!
KBTBD11	THAP9	0.505765	3.64e-12	-0.47879	0.161523	-2.71368	0.006654	#ERROR!
BAG6	THAP9	0.71668	0	-0.17576	0.627188	-2.71356	0.006656	#ERROR!
MGLL	THAP9	0.59807	0	-0.3697	0.29305	-2.71312	0.006665	#ERROR!
C18orf54	THAP9	0.776158	0	-0.04242	0.907364	-2.7128	0.006672	#ERROR!
RN7SL233P	THAP9	0.227608	0.003186	-0.68918	0.027487	-2.71274	0.006673	#ERROR!
PPM1D	THAP9	0.807581	0	0.042424	0.907364	-2.71154	0.006697	#ERROR!
CARMIL1	THAP9	0.716208	0	-0.17576	0.627188	-2.71112	0.006706	#ERROR!
RPL18P8	THAP9	-0.64644	0	0.298786	0.401695	2.71094	0.006709	-/0
HNRNPA3	THAP9	0.744981	0	-0.11515	0.75142	-2.71069	0.006714	#ERROR!
LOC101929439	THAP9	0.318375	2.91e-05	-0.63353	0.049228	-2.71041	0.00672	#ERROR!
LOC153910	THAP9	0.135203	0.082423	0.837532	0.002493	2.7096	0.006736	0/+
DNAJC10	THAP9	0.770653	0	-0.05455	0.881036	-2.7089	0.006751	#ERROR!
PPIAP58	THAP9	0.641782	0	-0.30488	0.39168	-2.70779	0.006773	#ERROR!
POLR1A	THAP9	0.738752	0	-0.12727	0.726057	-2.70679	0.006794	#ERROR!
BTBD1	THAP9	0.784698	0	-0.01818	0.96024	-2.70672	0.006795	#ERROR!
RLIM	THAP9	0.811064	0	0.054545	0.881036	-2.70637	0.006802	#ERROR!
NPLOC4	THAP9	0.689633	0	-0.22424	0.533401	-2.70599	0.00681	#ERROR!
DNAJC11	THAP9	0.732931	0	-0.13939	0.700932	-2.70589	0.006812	#ERROR!
NUP155	THAP9	0.764992	0	-0.06667	0.854813	-2.7048	0.006834	#ERROR!
ACSS2	THAP9	0.638291	0	-0.30909	0.384841	-2.7046	0.006839	#ERROR!
LITAF	THAP9	0.714888	0	-0.17576	0.627188	-2.70431	0.006845	#ERROR!
CCDC6	THAP9	0.74927	0	-0.10303	0.776998	-2.70425	0.006846	#ERROR!
ATP1B1	THAP9	0.577149	4.44e-16	-0.39394	0.259998	-2.70411	0.006849	#ERROR!
RPL34P18	THAP9	-0.253	0.001007	0.672811	0.033011	2.70372	0.006857	-/+
KCTD11	THAP9	0.714724	0	-0.17576	0.627188	-2.70347	0.006862	#ERROR!
PAK2	THAP9	0.759601	0	-0.07879	0.828717	-2.70308	0.00687	#ERROR!
GPATCH4	THAP9	0.743631	0	-0.11515	0.75142	-2.70308	0.00687	#ERROR!
COPA	THAP9	0.743585	0	-0.11515	0.75142	-2.70282	0.006875	#ERROR!
DAZAP1	THAP9	0.720616	0	-0.16364	0.651477	-2.70264	0.006879	#ERROR!
RALGAPB	THAP9	0.797668	0	0.018182	0.96024	-2.70249	0.006882	#ERROR!
KMT5AP3	THAP9	0.395584	1.33e-07	-0.57539	0.081792	-2.7024	0.006884	#ERROR!
AHCTF1	THAP9	0.793156	0	0.006061	0.986743	-2.70208	0.006891	#ERROR!
CEP350	THAP9	0.759407	0	-0.07879	0.828717	-2.70193	0.006894	#ERROR!
AIFM1	THAP9	0.748788	0	-0.10303	0.776998	-2.70149	0.006903	#ERROR!
MIA2	THAP9	0.759257	0	-0.07879	0.828717	-2.70104	0.006912	#ERROR!
CTNNB1	THAP9	0.764363	0	-0.06667	0.854813	-2.701	0.006913	#ERROR!
MEAK7	THAP9	0.748685	0	-0.10303	0.776998	-2.7009	0.006915	#ERROR!
BNIP3P39	THAP9	0.414865	2.74e-08	-0.55927	0.092789	-2.70063	0.006921	#ERROR!
CD33	THAP9	0.33921	7.8e-06	0.890909	0.000542	2.7003	0.006928	#ERROR!
LARGE1	THAP9	0.66024	0	-0.27273	0.445838	-2.70013	0.006931	#ERROR!
CERS2	THAP9	0.764219	0	-0.06667	0.854813	-2.70012	0.006931	#ERROR!
MAST2	THAP9	0.645067	0	-0.29697	0.404702	-2.7	0.006934	#ERROR!
BARD1	THAP9	0.748516	0	-0.10303	0.776998	-2.69993	0.006935	#ERROR!
AGO3	THAP9	0.818272	0	0.078788	0.828717	-2.69903	0.006954	#ERROR!
HSPA9	THAP9	0.769045	0	-0.05455	0.881036	-2.69897	0.006955	#ERROR!
RPL34P27	THAP9	-0.18421	0.017509	0.70951	0.021553	2.69884	0.006958	-/+
PLEKHA6	THAP9	0.644729	0	-0.29697	0.404702	-2.69854	0.006964	#ERROR!
LMCD1-AS1	THAP9	0.703894	0	0.960114	1.06e-05	2.69846	0.006966	#ERROR!
RDH13	THAP9	0.620229	0	-0.33333	0.346594	-2.69737	0.006989	#ERROR!
GTPBP4	THAP9	0.783199	0	-0.01818	0.96024	-2.69693	0.006998	#ERROR!
FBLIM1	THAP9	0.651958	0	-0.28485	0.425038	-2.69661	0.007005	#ERROR!
DYNC1H1	THAP9	0.644097	0	-0.29697	0.404702	-2.69583	0.007021	#ERROR!
FAM43A	THAP9	0.326347	1.78e-05	-0.62424	0.053718	-2.69412	0.007057	#ERROR!
ANKZF1	THAP9	0.741999	0	-0.11515	0.75142	-2.69391	0.007062	#ERROR!
RIPK1	THAP9	0.730643	0	-0.13939	0.700932	-2.6935	0.007071	#ERROR!
ELF3	THAP9	0.666004	0	-0.26061	0.467089	-2.69318	0.007077	#ERROR!
DIAPH1	THAP9	0.673125	0	-0.24848	0.488776	-2.69304	0.00708	#ERROR!
PELI1	THAP9	0.762764	0	-0.06667	0.854813	-2.69135	0.007116	#ERROR!
PLEKHF2	THAP9	0.786962	0	-0.00606	0.986743	-2.69111	0.007122	#ERROR!
AK4	THAP9	0.746923	0	-0.10303	0.776998	-2.69084	0.007127	#ERROR!
MYLK2	THAP9	0.439439	3.16e-09	-0.53545	0.110698	-2.69067	0.007131	#ERROR!
CTSV	THAP9	0.626828	0	-0.32121	0.365468	-2.69038	0.007137	#ERROR!
RCAN1	THAP9	0.686367	0	-0.22424	0.533401	-2.69038	0.007137	#ERROR!
ADPGK-AS1	THAP9	0.38477	3.08e-07	0.90044	0.000381	2.68967	0.007152	#ERROR!
FAM117B	THAP9	0.777215	0	-0.0303	0.933773	-2.68896	0.007167	#ERROR!
NARS1	THAP9	0.781837	0	-0.01818	0.96024	-2.68808	0.007186	#ERROR!
IBTK	THAP9	0.791075	0	0.006061	0.986743	-2.68802	0.007188	#ERROR!
MDN1	THAP9	0.746423	0	-0.10303	0.776998	-2.688	0.007188	#ERROR!
RNU6-1262P	THAP9	0.380282	4.33e-07	-0.5835	0.076596	-2.68777	0.007193	#ERROR!
CNTF	THAP9	0.756944	0	-0.07879	0.828717	-2.68736	0.007202	#ERROR!
DPY19L1	THAP9	0.781716	0	-0.01818	0.96024	-2.6873	0.007203	#ERROR!
DENND1B	THAP9	0.767141	0	-0.05455	0.881036	-2.68728	0.007204	#ERROR!
NT5C2	THAP9	0.734952	0	-0.12727	0.726057	-2.68587	0.007234	#ERROR!
FIGNL1	THAP9	0.812406	0	0.066667	0.854813	-2.68567	0.007239	#ERROR!
GHRLOS	THAP9	0.482278	4.73e-11	-0.49391	0.1468	-2.68534	0.007246	#ERROR!
MIS18A	THAP9	0.740436	0	-0.11515	0.75142	-2.68518	0.007249	#ERROR!
LOC105375267	THAP9	0.091579	0.240612	0.820672	0.003622	2.68501	0.007253	0/+
CAND1	THAP9	0.816413	0	0.078788	0.828717	-2.68494	0.007254	#ERROR!
APEX2	THAP9	0.704846	0	-0.18788	0.603218	-2.68492	0.007255	#ERROR!
OSBPL10	THAP9	0.72904	0	-0.13939	0.700932	-2.68487	0.007256	#ERROR!
MELK	THAP9	0.625292	0	-0.32121	0.365468	-2.68402	0.007274	#ERROR!
KBTBD8	THAP9	0.671105	0	-0.24848	0.488776	-2.68377	0.00728	#ERROR!
JAK1	THAP9	0.751046	0	-0.09091	0.802772	-2.68368	0.007282	#ERROR!
PPARD	THAP9	0.608035	0	-0.34545	0.328227	-2.68257	0.007306	#ERROR!
CENPP	THAP9	0.739801	0	-0.1155	0.750683	-2.68255	0.007306	#ERROR!
ARL5B	THAP9	0.811942	0	0.066667	0.854813	-2.68223	0.007313	#ERROR!
RNASEL	THAP9	0.684642	0	-0.22424	0.533401	-2.68219	0.007314	#ERROR!
PERP	THAP9	0.710472	0	-0.17576	0.627188	-2.68174	0.007324	#ERROR!
PNN	THAP9	0.775989	0	-0.0303	0.933773	-2.68119	0.007336	#ERROR!
IFIT1P1	THAP9	0.403912	6.8e-08	-0.56282	0.090292	-2.68055	0.00735	#ERROR!
JOSD1	THAP9	0.739562	0	-0.11515	0.75142	-2.68032	0.007355	#ERROR!
KRT8P32	THAP9	0.597857	0	-0.35866	0.308799	-2.68028	0.007356	#ERROR!
ORC6	THAP9	0.677356	0	-0.23636	0.510885	-2.68021	0.007358	#ERROR!
AHNAK	THAP9	0.670204	0	-0.24848	0.488776	-2.67965	0.00737	#ERROR!
KLF3	THAP9	0.7897	0	0.006061	0.986743	-2.6788	0.007389	#ERROR!
MFSD5	THAP9	0.70339	0	-0.18788	0.603218	-2.67766	0.007414	#ERROR!
CBFB	THAP9	0.780189	0	-0.01818	0.96024	-2.67745	0.007418	#ERROR!
BCOR	THAP9	0.789358	0	0.006061	0.986743	-2.67652	0.007439	#ERROR!
LPIN1	THAP9	0.689925	0	-0.21212	0.556306	-2.67536	0.007465	#ERROR!
NRDC	THAP9	0.779823	0	-0.01818	0.96024	-2.67511	0.007471	#ERROR!
EHHADH	THAP9	0.689852	0	-0.21212	0.556306	-2.67501	0.007473	#ERROR!
FAM169A	THAP9	0.537894	7.82e-14	-0.43161	0.212945	-2.67501	0.007473	#ERROR!
LOC105378721	THAP9	0.692805	0	-0.20669	0.566695	-2.67494	0.007474	#ERROR!
NNT	THAP9	0.727182	0	-0.13939	0.700932	-2.67492	0.007475	#ERROR!
RDH10	THAP9	0.702758	0	-0.18788	0.603218	-2.67451	0.007484	#ERROR!
APOOL	THAP9	0.834538	0	0.139394	0.700932	-2.67383	0.007499	#ERROR!
KIDINS220	THAP9	0.793432	0	0.018182	0.96024	-2.67345	0.007508	#ERROR!
INSIG1	THAP9	0.661542	0	-0.26061	0.467089	-2.67311	0.007515	#ERROR!
PANK1	THAP9	0.759685	0	-0.06667	0.854813	-2.67292	0.007519	#ERROR!
ARHGEF39	THAP9	0.548857	1.91e-14	-0.41818	0.229113	-2.67291	0.00752	#ERROR!
DNAJB12	THAP9	0.714876	0	-0.16364	0.651477	-2.67285	0.007521	#ERROR!
PKP3	THAP9	0.468938	1.86e-10	-0.50303	0.138334	-2.67249	0.007529	#ERROR!
FOLR2	THAP9	0.166375	0.032166	0.842424	0.00222	2.67115	0.007559	#ERROR!
HNF4A	THAP9	0.653635	0	-0.27273	0.445838	-2.67089	0.007565	#ERROR!
MIR3685	THAP9	0.67665	0	-0.23387	0.515478	-2.6703	0.007578	#ERROR!
DIS3L2	THAP9	0.753988	0	-0.07879	0.828717	-2.67003	0.007585	#ERROR!
KPNA4	THAP9	0.783524	0	-0.00606	0.986743	-2.66854	0.007618	#ERROR!
DDX10	THAP9	0.84473	0	0.175758	0.627188	-2.66694	0.007655	#ERROR!
IQGAP3	THAP9	0.503396	4.76e-12	-0.46667	0.173939	-2.6664	0.007667	#ERROR!
RNU6-767P	THAP9	0.33795	8.47e-06	-0.60927	0.061509	-2.66614	0.007673	#ERROR!
EEF1A1P16	THAP9	0.712915	0	0.960491	1.02e-05	2.66508	0.007697	#ERROR!
HMGB3P4	THAP9	0.469656	1.73e-10	-0.50009	0.141034	-2.6649	0.007701	#ERROR!
PLA2G4F	THAP9	0.502695	5.15e-12	-0.46667	0.173939	-2.66404	0.007721	#ERROR!
HDAC1	THAP9	0.773234	0	-0.0303	0.933773	-2.66386	0.007725	#ERROR!
RNU7-140P	THAP9	0.462595	3.5e-10	-0.5065	0.135195	-2.66381	0.007726	#ERROR!
RPL28P5	THAP9	-0.66887	0	0.244659	0.49571	2.66334	0.007737	-/0
MIR600HG	THAP9	0.500999	6.22e-12	-0.46809	0.172455	-2.66291	0.007747	#ERROR!
ACO2	THAP9	0.61172	0	-0.33333	0.346594	-2.66287	0.007748	#ERROR!
MIA3	THAP9	0.712884	0	-0.16364	0.651477	-2.66263	0.007753	#ERROR!
ETV6	THAP9	0.712806	0	-0.16364	0.651477	-2.66223	0.007763	#ERROR!
CDCA3	THAP9	0.494905	1.22e-11	-0.47417	0.166192	-2.66218	0.007764	#ERROR!
PSPN	THAP9	0.579239	4.44e-16	-0.3769	0.283003	-2.66166	0.007776	#ERROR!
POLA2	THAP9	0.673237	0	-0.23636	0.510885	-2.66115	0.007787	#ERROR!
LY75-CD302	THAP9	0.614745	0	-0.32827	0.354418	-2.66076	0.007797	#ERROR!
PSPC1P1	THAP9	0.728961	0	-0.12965	0.721106	-2.65948	0.007826	#ERROR!
LOC102723322	THAP9	0.636795	0	-0.29503	0.40793	-2.65931	0.00783	#ERROR!
RASA2	THAP9	0.764958	0	-0.04863	0.893868	-2.65907	0.007836	#ERROR!
RBM39	THAP9	0.817032	0	0.090909	0.802772	-2.6589	0.00784	#ERROR!
EPB41L4B	THAP9	0.705898	0	-0.17576	0.627188	-2.65864	0.007846	#ERROR!
ATP6AP1	THAP9	0.658243	0	-0.26061	0.467089	-2.6584	0.007851	#ERROR!
CHL1-AS2	THAP9	0.132004	0.090014	0.830303	0.00294	2.65807	0.007859	0/+
DDX27	THAP9	0.74651	0	-0.09091	0.802772	-2.6577	0.007868	#ERROR!
RBM15B	THAP9	0.741023	0	-0.10303	0.776998	-2.65759	0.00787	#ERROR!
RPN2	THAP9	0.751827	0	-0.07879	0.828717	-2.65747	0.007873	#ERROR!
NOP2	THAP9	0.679341	0	-0.22424	0.533401	-2.65725	0.007878	#ERROR!
HEPH	THAP9	0.692656	0	-0.2	0.579584	-2.65667	0.007892	#ERROR!
RNU6-652P	THAP9	0.652183	0	-0.26976	0.450999	-2.65646	0.007897	#ERROR!
NPNT	THAP9	0.685823	0	-0.21212	0.556306	-2.65577	0.007913	#ERROR!
PDCL3P6	THAP9	0.184798	0.017148	-0.70048	0.024068	-2.65518	0.007927	#ERROR!
MIR4520-1	THAP9	0.404584	6.44e-08	-0.5552	0.09571	-2.65467	0.007939	#ERROR!
BRD7P2	THAP9	0.519988	6.99e-13	-0.44513	0.197357	-2.65455	0.007941	#ERROR!
DUSP16	THAP9	0.729109	0	-0.12727	0.726057	-2.65419	0.00795	#ERROR!
CKMT1A	THAP9	0.487904	2.6e-11	-0.47879	0.161523	-2.654	0.007954	#ERROR!
IARS2	THAP9	0.816351	0	0.090909	0.802772	-2.65376	0.00796	#ERROR!
NABP1	THAP9	0.761582	0	-0.05455	0.881036	-2.65364	0.007963	#ERROR!
FILNC1	THAP9	0.184648	0.017239	0.845824	0.002043	2.65346	0.007967	#ERROR!
NAPA-AS1	THAP9	0.508991	2.52e-12	0.924016	0.000133	2.65335	0.00797	#ERROR!
RBM12	THAP9	0.835811	0	0.151515	0.676065	-2.65326	0.007972	#ERROR!
ANAPC1	THAP9	0.785769	0	0.006061	0.986743	-2.65273	0.007984	#ERROR!
AP4E1	THAP9	0.776174	0	-0.01818	0.96024	-2.65184	0.008005	#ERROR!
DGKD	THAP9	0.704415	0	-0.17576	0.627188	-2.65122	0.00802	#ERROR!
ABRACL	THAP9	0.785525	0	0.006061	0.986743	-2.65113	0.008022	#ERROR!
PPP1R15B	THAP9	0.771074	0	-0.0303	0.933773	-2.6504	0.00804	#ERROR!
FSIP2-AS1	THAP9	0.714811	0	-0.15484	0.669302	-2.64979	0.008054	#ERROR!
FBXW7	THAP9	0.821956	0	0.109423	0.763483	-2.64957	0.00806	#ERROR!
CHPF2	THAP9	0.670628	0	-0.23636	0.510885	-2.64918	0.008069	#ERROR!
MBNL3	THAP9	0.68439	0	-0.21212	0.556306	-2.64897	0.008074	#ERROR!
KHSRP	THAP9	0.728135	0	-0.12727	0.726057	-2.64896	0.008074	#ERROR!
HIRA	THAP9	0.599398	0	-0.34545	0.328227	-2.64837	0.008088	#ERROR!
MCL1	THAP9	0.727828	0	-0.12727	0.726057	-2.64732	0.008113	#ERROR!
GOLGA3	THAP9	0.648234	0	-0.27273	0.445838	-2.6473	0.008114	#ERROR!
EIF4E	THAP9	0.875957	0	0.29697	0.404702	-2.64699	0.008121	#ERROR!
EPB41L5	THAP9	0.811238	0	0.078788	0.828717	-2.64638	0.008136	#ERROR!
ABCE1	THAP9	0.887893	0	0.345455	0.328227	-2.64618	0.008141	#ERROR!
MYBBP1A	THAP9	0.669968	0	-0.23636	0.510885	-2.64617	0.008141	#ERROR!
RPL10P9	THAP9	0.308508	5.26e-05	0.878788	0.000814	2.64597	0.008146	#ERROR!
MTMR4	THAP9	0.770323	0	-0.0303	0.933773	-2.64574	0.008151	#ERROR!
MB	THAP9	0.137015	0.078359	0.830303	0.00294	2.64523	0.008164	0/+
RPGR	THAP9	0.815299	0	0.091186	0.802181	-2.64514	0.008166	#ERROR!
DNAJB11	THAP9	0.754943	0	-0.06667	0.854813	-2.64494	0.008171	#ERROR!
MAP3K5	THAP9	0.696514	0	-0.18788	0.603218	-2.64373	0.0082	#ERROR!
CDHR5	THAP9	0.342989	6.08e-06	-0.6	0.066688	-2.6437	0.008201	#ERROR!
LOC100420880	THAP9	0.211931	0.006123	-0.68335	0.029377	-2.64355	0.008204	#ERROR!
FUBP1	THAP9	0.779651	0	-0.00606	0.986743	-2.64349	0.008206	#ERROR!
NUDT16	THAP9	0.726982	0	-0.12727	0.726057	-2.64279	0.008223	#ERROR!
CCNYL6	THAP9	0.569395	1.33e-15	-0.38278	0.274943	-2.64199	0.008242	#ERROR!
LACC1	THAP9	0.738153	0	-0.10303	0.776998	-2.64164	0.00825	#ERROR!
PDCD4	THAP9	0.793217	0	0.030303	0.933773	-2.64147	0.008255	#ERROR!
IPPK	THAP9	0.664455	0	-0.24316	0.498434	-2.63931	0.008307	#ERROR!
PRRC1	THAP9	0.788321	0	0.018182	0.96024	-2.63911	0.008312	#ERROR!
NUP205	THAP9	0.774066	0	-0.01818	0.96024	-2.63856	0.008326	#ERROR!
HNRNPM	THAP9	0.726143	0	-0.12727	0.726057	-2.63833	0.008332	#ERROR!
COPB2	THAP9	0.773851	0	-0.01818	0.96024	-2.6372	0.008359	#ERROR!
ENOPH1	THAP9	0.890042	0	0.357576	0.310376	-2.63716	0.00836	#ERROR!
IRF3	THAP9	0.688138	0	-0.2	0.579584	-2.63494	0.008415	#ERROR!
FASTKD1	THAP9	0.787517	0	0.018182	0.96024	-2.63377	0.008444	#ERROR!
ENO1	THAP9	0.604222	0	-0.33333	0.346594	-2.63294	0.008465	#ERROR!
BMS1P16	THAP9	0.530501	1.96e-13	-0.4264	0.219138	-2.6329	0.008466	#ERROR!
GAPVD1	THAP9	0.800764	0	0.054545	0.881036	-2.63242	0.008478	#ERROR!
PPAN	THAP9	0.673943	0	-0.22424	0.533401	-2.6322	0.008483	#ERROR!
LONP2	THAP9	0.782432	0	0.006061	0.986743	-2.63094	0.008515	#ERROR!
RPLP0P6	THAP9	-0.08267	0.289657	0.745455	0.01333	2.63082	0.008518	0/+
KDM5C	THAP9	0.724729	0	-0.12727	0.726057	-2.63081	0.008518	#ERROR!
CIP2A	THAP9	0.736175	0	-0.10303	0.776998	-2.63074	0.00852	#ERROR!
POLR3B	THAP9	0.757639	0	-0.05455	0.881036	-2.63018	0.008534	#ERROR!
PLK1	THAP9	0.284938	0.000199	-0.63636	0.047912	-2.62977	0.008544	#ERROR!
MAD1L1	THAP9	0.644021	0	-0.27273	0.445838	-2.62911	0.008561	#ERROR!
NCOA3	THAP9	0.78676	0	0.018182	0.96024	-2.62876	0.00857	#ERROR!
GATAD2A	THAP9	0.636019	0	-0.28485	0.425038	-2.62807	0.008587	#ERROR!
NUDT19	THAP9	0.70597	0	-0.16364	0.651477	-2.6276	0.008599	#ERROR!
ANKRD50	THAP9	0.808654	0	0.078788	0.828717	-2.62748	0.008602	#ERROR!
BCL2L11	THAP9	0.741067	0	-0.09091	0.802772	-2.62705	0.008613	#ERROR!
MTMR14	THAP9	0.735369	0	-0.10303	0.776998	-2.62632	0.008631	#ERROR!
RPS10P2	THAP9	-0.29625	0.000106	0.62806	0.051841	2.62607	0.008638	-/0
CLCA4	THAP9	-0.00647	0.934026	-0.78182	0.007547	-2.62592	0.008642	0/-
ATP6V1H	THAP9	0.812581	0	0.090909	0.802772	-2.62557	0.00865	#ERROR!
EBLN2	THAP9	0.635347	0	-0.28485	0.425038	-2.62523	0.008659	#ERROR!
MYO7B	THAP9	0.490954	1.88e-11	-0.46667	0.173939	-2.62481	0.00867	#ERROR!
FANCD2OS	THAP9	0.303291	7.13e-05	-0.6228	0.054439	-2.62378	0.008696	#ERROR!
ACER3	THAP9	0.723391	0	-0.12727	0.726057	-2.62373	0.008697	#ERROR!
KDM3A	THAP9	0.785981	0	0.018182	0.96024	-2.62363	0.0087	#ERROR!
DHDDS	THAP9	0.692211	0	-0.18788	0.603218	-2.62282	0.008721	#ERROR!
ECI2-DT	THAP9	0.49202	1.67e-11	-0.46485	0.175845	-2.62252	0.008728	#ERROR!
BMP2K	THAP9	0.776317	0	-0.00606	0.986743	-2.62224	0.008735	#ERROR!
CCDC47	THAP9	0.785757	0	0.018182	0.96024	-2.62215	0.008738	#ERROR!
ATXN7L3	THAP9	0.745618	0	-0.07879	0.828717	-2.62192	0.008744	#ERROR!
PDZD8	THAP9	0.734522	0	-0.10303	0.776998	-2.62169	0.00875	#ERROR!
RIF1	THAP9	0.790244	0	0.030303	0.933773	-2.62142	0.008756	#ERROR!
ALMS1-IT1	THAP9	0.719578	0	-0.13415	0.711774	-2.62133	0.008759	#ERROR!
MMS22L	THAP9	0.761287	0	-0.04242	0.907364	-2.62129	0.00876	#ERROR!
ACAD10	THAP9	0.7712	0	-0.01818	0.96024	-2.62066	0.008776	#ERROR!
EXOC2	THAP9	0.77596	0	-0.00606	0.986743	-2.61998	0.008794	#ERROR!
RETREG3	THAP9	0.794519	0	0.042424	0.907364	-2.61979	0.008798	#ERROR!
HNRNPH2	THAP9	0.815819	0	0.10303	0.776998	-2.61895	0.00882	#ERROR!
DGCR2	THAP9	0.641528	0	-0.27273	0.445838	-2.61841	0.008834	#ERROR!
LPIN3	THAP9	0.543892	3.64e-14	-0.40606	0.244282	-2.61836	0.008835	#ERROR!
EVI5	THAP9	0.798712	0	0.054545	0.881036	-2.61809	0.008842	#ERROR!
CYTH1	THAP9	0.703931	0	-0.16364	0.651477	-2.6174	0.00886	#ERROR!
PP7080	THAP9	0.438279	3.51e-09	-0.51515	0.127553	-2.61651	0.008883	#ERROR!
RNA5SP268	THAP9	0.430346	7.17e-09	-0.52223	0.121503	-2.61628	0.008889	#ERROR!
ESYT2	THAP9	0.784838	0	0.018182	0.96024	-2.61612	0.008894	#ERROR!
CPOX	THAP9	0.798459	0	0.054711	0.880676	-2.61591	0.008899	#ERROR!
BCL11B	THAP9	0.655997	0	-0.24848	0.488776	-2.61584	0.008901	#ERROR!
GID8	THAP9	0.755156	0	-0.05455	0.881036	-2.61557	0.008908	#ERROR!
RAB7A	THAP9	0.780034	0	0.006061	0.986743	-2.61545	0.008911	#ERROR!
MKRN1	THAP9	0.76538	0	-0.0303	0.933773	-2.61544	0.008911	#ERROR!
HTT	THAP9	0.697171	0	-0.17576	0.627188	-2.6154	0.008912	#ERROR!
ATP6V0A1	THAP9	0.670157	0	-0.22424	0.533401	-2.61483	0.008927	#ERROR!
DIAPH2-AS1	THAP9	0.505714	3.66e-12	-0.44789	0.194263	-2.61447	0.008937	#ERROR!
COG8	THAP9	0.738804	0	-0.09091	0.802772	-2.61446	0.008937	#ERROR!
KIAA0319L	THAP9	0.779846	0	0.006061	0.986743	-2.61424	0.008943	#ERROR!
FAM53B	THAP9	0.581539	2.22e-16	-0.35758	0.310376	-2.61417	0.008944	#ERROR!
FN3KRP	THAP9	0.78451	0	0.018182	0.96024	-2.61397	0.00895	#ERROR!
HAUS8	THAP9	0.655503	0	-0.24848	0.488776	-2.61366	0.008958	#ERROR!
MCF2L2	THAP9	0.647459	0	-0.2614	0.465685	-2.61325	0.008969	#ERROR!
MCM3	THAP9	0.683537	0	-0.2	0.579584	-2.61308	0.008973	#ERROR!
RPL19P11	THAP9	-0.05623	0.471784	0.753957	0.011768	2.61282	0.00898	0/+
DPP9	THAP9	0.662504	0	-0.23636	0.510885	-2.6124	0.008991	#ERROR!
IWS1	THAP9	0.77953	0	0.006061	0.986743	-2.61222	0.008996	#ERROR!
PPARGC1A	THAP9	0.571505	8.88e-16	-0.3697	0.29305	-2.6115	0.009014	#ERROR!
PPP4R3A	THAP9	0.73238	0	-0.10303	0.776998	-2.61002	0.009054	#ERROR!
GALNT6	THAP9	0.669027	0	-0.22424	0.533401	-2.60967	0.009063	#ERROR!
ENO3	THAP9	0.551404	1.38e-14	-0.39394	0.259998	-2.60904	0.00908	#ERROR!
CDK6	THAP9	0.743301	0	-0.07879	0.828717	-2.60883	0.009085	#ERROR!
ANKRD42	THAP9	0.822486	0	0.127273	0.726057	-2.60813	0.009104	#ERROR!
EDEM1	THAP9	0.758925	0	-0.04242	0.907364	-2.60722	0.009128	#ERROR!
NEAT1	THAP9	0.560731	4e-15	-0.38182	0.276255	-2.60712	0.009131	#ERROR!
BABAM2	THAP9	0.80148	0	0.066667	0.854813	-2.60683	0.009138	#ERROR!
GRAP	THAP9	0.720136	0	-0.12727	0.726057	-2.60664	0.009144	#ERROR!
MUC13	THAP9	0.708008	0	-0.15152	0.676065	-2.60657	0.009145	#ERROR!
LOC112268124	THAP9	0.737262	0	-0.09091	0.802772	-2.60594	0.009162	#ERROR!
IRGQ	THAP9	0.579278	4.44e-16	-0.35758	0.310376	-2.6056	0.009171	#ERROR!
FMN1	THAP9	0.742613	0	-0.07879	0.828717	-2.60497	0.009188	#ERROR!
ALAS2	THAP9	0.312016	4.27e-05	-0.61212	0.059972	-2.6046	0.009198	#ERROR!
FUS	THAP9	0.731342	0	-0.10303	0.776998	-2.6044	0.009204	#ERROR!
DAGLB	THAP9	0.70756	0	-0.15152	0.676065	-2.60431	0.009206	#ERROR!
HNRNPA1P10	THAP9	0.79231	0	0.042684	0.906799	-2.60413	0.009211	#ERROR!
EPS15L1	THAP9	0.731221	0	-0.10303	0.776998	-2.60374	0.009221	#ERROR!
EEF1A1P2	THAP9	0.077467	0.32118	0.804893	0.004973	2.60371	0.009222	0/+
RBM14	THAP9	0.681541	0	-0.2	0.579584	-2.60368	0.009223	#ERROR!
LOC651337	THAP9	0.445166	1.86e-09	-0.50456	0.136942	-2.60203	0.009267	#ERROR!
RNF40	THAP9	0.700793	0	-0.16364	0.651477	-2.60182	0.009273	#ERROR!
ABHD15	THAP9	0.719077	0	-0.12727	0.726057	-2.60111	0.009292	#ERROR!
RGP1	THAP9	0.700645	0	-0.16364	0.651477	-2.60109	0.009293	#ERROR!
GRPEL1	THAP9	0.804873	0	0.078788	0.828717	-2.60023	0.009316	#ERROR!
ANXA4	THAP9	0.724798	0	-0.11515	0.75142	-2.60022	0.009316	#ERROR!
PPARA	THAP9	0.736174	0	-0.09091	0.802772	-2.59995	0.009324	#ERROR!
DEPDC1	THAP9	0.736121	0	-0.09091	0.802772	-2.59966	0.009332	#ERROR!
MSH5-SAPCD1	THAP9	0.730432	0	-0.10303	0.776998	-2.59948	0.009337	#ERROR!
N4BP2	THAP9	0.800406	0	0.066667	0.854813	-2.59929	0.009342	#ERROR!
LOC100419046	THAP9	0.481975	4.88e-11	-0.46791	0.17264	-2.59922	0.009344	#ERROR!
PRKAR2A	THAP9	0.782079	0	0.018182	0.96024	-2.59814	0.009373	#ERROR!
HHIP	THAP9	0.567813	1.33e-15	-0.3697	0.29305	-2.59775	0.009384	#ERROR!
MIR135A1	THAP9	0.581941	2.22e-16	-0.35081	0.320274	-2.59624	0.009425	#ERROR!
PON2	THAP9	0.767201	0	-0.01818	0.96024	-2.59601	0.009431	#ERROR!
NOP9	THAP9	0.686564	0	-0.18788	0.603218	-2.59574	0.009439	#ERROR!
P4HB	THAP9	0.718022	0	-0.12727	0.726057	-2.59562	0.009442	#ERROR!
MARCHF6	THAP9	0.808457	0	0.090909	0.802772	-2.59532	0.00945	#ERROR!
RNF128	THAP9	0.781593	0	0.018182	0.96024	-2.59499	0.009459	#ERROR!
GTF3C1	THAP9	0.711803	0	-0.13939	0.700932	-2.59467	0.009468	#ERROR!
CSNK2A2	THAP9	0.786151	0	0.030303	0.933773	-2.59423	0.00948	#ERROR!
ERP44	THAP9	0.781446	0	0.018182	0.96024	-2.59405	0.009485	#ERROR!
DDAH1	THAP9	0.786098	0	0.030303	0.933773	-2.59388	0.00949	#ERROR!
LOC101927884	THAP9	0.42294	1.37e-08	-0.52223	0.121503	-2.5935	0.009501	#ERROR!
LTBP1	THAP9	0.643221	0	-0.26061	0.467089	-2.59283	0.009519	#ERROR!
MGME1	THAP9	0.711349	0	-0.13939	0.700932	-2.59235	0.009532	#ERROR!
MRFAP1	THAP9	0.794946	0	0.054545	0.881036	-2.59213	0.009538	#ERROR!
RPL24P7	THAP9	-0.23121	0.002725	0.660848	0.037494	2.59127	0.009562	-/+
CCDC9	THAP9	0.711111	0	-0.13939	0.700932	-2.59114	0.009566	#ERROR!
EPS8	THAP9	0.761101	0	-0.0303	0.933773	-2.58964	0.009608	#ERROR!
RC3H2	THAP9	0.807655	0	0.090909	0.802772	-2.58951	0.009611	#ERROR!
MED28	THAP9	0.824767	0	0.975758	1.47e-06	2.58868	0.009634	#ERROR!
FLT1	THAP9	0.745158	0	-0.06667	0.854813	-2.58865	0.009635	#ERROR!
LOC101928725	THAP9	0.576624	4.44e-16	-0.35475	0.314484	-2.58744	0.009669	#ERROR!
ARHGEF11	THAP9	0.716429	0	-0.12727	0.726057	-2.58737	0.009671	#ERROR!
KPNA1	THAP9	0.798689	0	0.066667	0.854813	-2.58731	0.009673	#ERROR!
PTPRK	THAP9	0.750272	0	-0.05455	0.881036	-2.58722	0.009675	#ERROR!
DHX8	THAP9	0.770687	0	-0.00606	0.986743	-2.58697	0.009682	#ERROR!
GBA	THAP9	0.677896	0	-0.2	0.579584	-2.58663	0.009692	#ERROR!
CLPTM1L	THAP9	0.656719	0	-0.23636	0.510885	-2.58663	0.009692	#ERROR!
ARFGAP2	THAP9	0.794098	0	0.054545	0.881036	-2.58634	0.0097	#ERROR!
CDK12	THAP9	0.780171	0	0.018182	0.96024	-2.58583	0.009715	#ERROR!
BRWD3	THAP9	0.755191	0	-0.04255	0.907083	-2.58553	0.009723	#ERROR!
CLDN12	THAP9	0.749945	0	-0.05455	0.881036	-2.58534	0.009728	#ERROR!
MCU	THAP9	0.677429	0	-0.2	0.579584	-2.58446	0.009753	#ERROR!
ECPAS	THAP9	0.779954	0	0.018182	0.96024	-2.58443	0.009754	#ERROR!
EIF5B	THAP9	0.74978	0	-0.05455	0.881036	-2.58439	0.009755	#ERROR!
MTMR1	THAP9	0.765254	0	-0.01818	0.96024	-2.58415	0.009762	#ERROR!
DHX37	THAP9	0.656127	0	-0.23636	0.510885	-2.58401	0.009766	#ERROR!
COBLL1	THAP9	0.770136	0	-0.00606	0.986743	-2.58356	0.009779	#ERROR!
ACSL3	THAP9	0.749535	0	-0.05455	0.881036	-2.58298	0.009795	#ERROR!
NT5DC1P2	THAP9	0.653695	0	-0.23995	0.504302	-2.58286	0.009799	#ERROR!
MTBP	THAP9	0.774886	0	0.006079	0.986703	-2.58265	0.009804	#ERROR!
MIR4482	THAP9	0.455247	7.17e-10	-0.48912	0.151374	-2.58224	0.009816	#ERROR!
RN7SL381P	THAP9	0.539774	6.17e-14	-0.39891	0.253486	-2.58222	0.009817	#ERROR!
PHACTR4	THAP9	0.779495	0	0.018182	0.96024	-2.58148	0.009838	#ERROR!
BSG	THAP9	0.624658	0	-0.28485	0.425038	-2.58063	0.009862	#ERROR!
C1orf74	THAP9	0.76966	0	-0.00606	0.986743	-2.58062	0.009862	#ERROR!
CMTM4	THAP9	0.726906	0	-0.10303	0.776998	-2.58057	0.009864	#ERROR!
ERMP1	THAP9	0.702809	0	-0.15152	0.676065	-2.58054	0.009865	#ERROR!
GANAB	THAP9	0.784023	0	0.030303	0.933773	-2.58027	0.009872	#ERROR!
PPM1B	THAP9	0.797619	0	0.066667	0.854813	-2.5799	0.009883	#ERROR!
HEXB	THAP9	0.759439	0	-0.0303	0.933773	-2.57973	0.009888	#ERROR!
ANP32E	THAP9	0.738072	0	-0.07879	0.828717	-2.57969	0.009889	#ERROR!
CEACAM6	THAP9	0.500452	6.62e-12	-0.44242	0.200423	-2.5796	0.009891	#ERROR!
NOLC1	THAP9	0.77435	0	0.006061	0.986743	-2.57933	0.009899	#ERROR!
ANO10	THAP9	0.668929	0	-0.21212	0.556306	-2.5772	0.00996	#ERROR!
POLH	THAP9	0.768988	0	-0.00606	0.986743	-2.57647	0.009981	#ERROR!
BRI3BP	THAP9	0.675636	0	-0.2	0.579584	-2.57614	0.009991	#ERROR!
ATP2C1	THAP9	0.78802	0	0.042424	0.907364	-2.57605	0.009994	#ERROR!
GOLGB1	THAP9	0.758795	0	-0.0303	0.933773	-2.57591	0.009998	#ERROR!
GPC2	THAP9	0.551162	1.42e-14	-0.38298	0.274673	-2.57569	0.010004	#ERROR!
MSL2	THAP9	0.773545	0	0.006061	0.986743	-2.57428	0.010045	#ERROR!
LOC317727	THAP9	-0.32183	2.36e-05	0.597503	0.06813	2.57406	0.010051	-/0
JPT1	THAP9	0.597923	0	-0.32121	0.365468	-2.57396	0.010054	#ERROR!
DDX58	THAP9	0.675156	0	-0.2	0.579584	-2.57392	0.010055	#ERROR!
RALB	THAP9	0.75323	0	-0.04242	0.907364	-2.57376	0.01006	#ERROR!
KRT8P5	THAP9	0.502697	5.15e-12	-0.43769	0.20585	-2.57238	0.0101	#ERROR!
AFF4	THAP9	0.773209	0	0.006061	0.986743	-2.57218	0.010106	#ERROR!
ANKHD1	THAP9	0.747631	0	-0.05455	0.881036	-2.57208	0.010109	#ERROR!
MIR4477B	THAP9	0.696716	0	-0.15952	0.659792	-2.57114	0.010136	#ERROR!
ANKRD13C	THAP9	0.813544	0	0.115152	0.75142	-2.57107	0.010139	#ERROR!
PRSS8	THAP9	0.4745	1.06e-10	-0.46667	0.173939	-2.57083	0.010146	#ERROR!
RPL34P10	THAP9	0.254251	0.000948	-0.642	0.045362	-2.57046	0.010156	#ERROR!
PDP1	THAP9	0.752662	0	-0.04242	0.907364	-2.57046	0.010156	#ERROR!
MEP1B	THAP9	0.202579	0.008857	-0.67273	0.033041	-2.56949	0.010185	#ERROR!
EXOC6	THAP9	0.800513	0	0.078788	0.828717	-2.56938	0.010188	#ERROR!
MAGED1	THAP9	0.747099	0	-0.05455	0.881036	-2.56905	0.010198	#ERROR!
CPT2	THAP9	0.746958	0	-0.05455	0.881036	-2.56825	0.010221	#ERROR!
MARCKS	THAP9	0.746924	0	-0.05455	0.881036	-2.56805	0.010227	#ERROR!
MSH5	THAP9	0.56927	1.33e-15	-0.35758	0.310376	-2.56802	0.010228	#ERROR!
NPAS2	THAP9	0.518866	7.99e-13	-0.41818	0.229113	-2.56733	0.010248	#ERROR!
POLR2B	THAP9	0.85834	0	0.260606	0.467089	-2.56726	0.010251	#ERROR!
GDF9	THAP9	0.70611	0	-0.13982	0.700057	-2.56695	0.01026	#ERROR!
FOXM1	THAP9	0.549234	1.82e-14	-0.38182	0.276255	-2.56531	0.010308	#ERROR!
AKAP9	THAP9	0.772092	0	0.006061	0.986743	-2.5652	0.010312	#ERROR!
PPIP5K1	THAP9	0.735235	0	-0.07879	0.828717	-2.56407	0.010345	#ERROR!
CCDC158	THAP9	0.723639	0	-0.10334	0.776334	-2.56402	0.010347	#ERROR!
ANP32B	THAP9	0.73522	0	-0.07879	0.828717	-2.56399	0.010348	#ERROR!
GLE1	THAP9	0.735127	0	-0.07879	0.828717	-2.56349	0.010363	#ERROR!
GK	THAP9	0.686337	0	-0.17576	0.627188	-2.56312	0.010374	#ERROR!
GCG	THAP9	0.031576	0.686316	0.781818	0.007547	2.56273	0.010385	0/+
LINC02626	THAP9	0.41647	2.39e-08	-0.519	0.124243	-2.56257	0.01039	#ERROR!
ETV3	THAP9	0.723495	0	-0.10303	0.776998	-2.56246	0.010393	#ERROR!
CYFIP1	THAP9	0.711568	0	-0.12727	0.726057	-2.56241	0.010395	#ERROR!
PABPN1	THAP9	0.734903	0	-0.07879	0.828717	-2.56226	0.010399	#ERROR!
NAA25	THAP9	0.8123	0	0.115152	0.75142	-2.56184	0.010412	#ERROR!
NIPBL	THAP9	0.763897	0	-0.01216	0.973408	-2.56077	0.010444	#ERROR!
RMC1	THAP9	0.692205	0	-0.16364	0.651477	-2.55984	0.010472	#ERROR!
ARL14	THAP9	0.61957	0	-0.28485	0.425038	-2.55974	0.010475	#ERROR!
RPL22P4	THAP9	0.155859	0.044942	-0.69631	0.025293	-2.5597	0.010476	#ERROR!
RNF157-AS1	THAP9	0.539672	6.26e-14	-0.39145	0.263288	-2.55962	0.010479	#ERROR!
ADGRA3	THAP9	0.803433	0	0.090909	0.802772	-2.55925	0.01049	#ERROR!
LAMC2	THAP9	0.678734	0	-0.18788	0.603218	-2.55884	0.010502	#ERROR!
LINC01970	THAP9	0.249768	0.001173	-0.64197	0.045376	-2.55828	0.010519	#ERROR!
MORC2	THAP9	0.766009	0	-0.00606	0.986743	-2.55824	0.01052	#ERROR!
DHX16	THAP9	0.716729	0	-0.11515	0.75142	-2.55796	0.010529	#ERROR!
LOC100505549	THAP9	0.803174	0	0.090909	0.802772	-2.55741	0.010545	#ERROR!
MTCP1	THAP9	0.755588	0	-0.0303	0.933773	-2.55699	0.010558	#ERROR!
MPP6	THAP9	0.691511	0	-0.16364	0.651477	-2.55649	0.010573	#ERROR!
ESYT1	THAP9	0.755466	0	-0.0303	0.933773	-2.55628	0.01058	#ERROR!
RNU6-722P	THAP9	0.699704	0	-0.14771	0.683843	-2.55537	0.010608	#ERROR!
DNAJC13	THAP9	0.770476	0	0.006061	0.986743	-2.55517	0.010614	#ERROR!
ABLIM1	THAP9	0.703913	0	-0.13939	0.700932	-2.55487	0.010623	#ERROR!
KIAA0100	THAP9	0.722052	0	-0.10303	0.776998	-2.55486	0.010623	#ERROR!
PPAT	THAP9	0.879919	0	0.345455	0.328227	-2.5544	0.010637	#ERROR!
NT5DC4	THAP9	0.377471	5.35e-07	-0.54953	0.09987	-2.5536	0.010661	#ERROR!
AFG1L	THAP9	0.775076	0	0.018182	0.96024	-2.55339	0.010668	#ERROR!
LOC105375095	THAP9	0.5854	0	-0.33086	0.350401	-2.55264	0.010691	#ERROR!
MAD2L1	THAP9	0.784462	0	0.042424	0.907364	-2.5526	0.010692	#ERROR!
RAB6A	THAP9	0.84973	0	0.236364	0.510885	-2.55221	0.010704	#ERROR!
PTGR2	THAP9	0.779589	0	0.030303	0.933773	-2.55157	0.010724	#ERROR!
KNSTRN	THAP9	0.670166	0	-0.2	0.579584	-2.55098	0.010742	#ERROR!
RNPS1	THAP9	0.749269	0	-0.04242	0.907364	-2.55088	0.010745	#ERROR!
NUDT15	THAP9	0.702958	0	-0.13939	0.700932	-2.55011	0.010769	#ERROR!
KLHDC4	THAP9	0.66287	0	-0.21212	0.556306	-2.5498	0.010778	#ERROR!
BAIAP2L1	THAP9	0.676698	0	-0.18788	0.603218	-2.54937	0.010792	#ERROR!
DNAI4	THAP9	0.689927	0	-0.16364	0.651477	-2.54887	0.010807	#ERROR!
CDK13	THAP9	0.79296	0	0.066667	0.854813	-2.548	0.010834	#ERROR!
ECHS1	THAP9	0.632596	0	-0.26061	0.467089	-2.54775	0.010842	#ERROR!
PFKFB2	THAP9	0.563794	2.66e-15	-0.35758	0.310376	-2.54773	0.010843	#ERROR!
POLA1	THAP9	0.788337	0	0.054545	0.881036	-2.54758	0.010847	#ERROR!
MYD88	THAP9	0.655163	0	-0.22424	0.533401	-2.54755	0.010848	#ERROR!
EMX1	THAP9	0.260823	0.000689	-0.63222	0.049846	-2.54676	0.010873	#ERROR!
FIP1L1	THAP9	0.845476	0	0.224242	0.533401	-2.54639	0.010884	#ERROR!
OAS1	THAP9	0.523437	4.63e-13	-0.40606	0.244282	-2.54638	0.010885	#ERROR!
PGPEP1	THAP9	0.682793	0	-0.17576	0.627188	-2.54633	0.010886	#ERROR!
P4HA1	THAP9	0.70219	0	-0.13939	0.700932	-2.5463	0.010887	#ERROR!
NOM1	THAP9	0.769021	0	0.006061	0.986743	-2.54618	0.010891	#ERROR!
PROX1	THAP9	0.753622	0	-0.0303	0.933773	-2.5455	0.010912	#ERROR!
LSG1	THAP9	0.783351	0	0.042424	0.907364	-2.54534	0.010917	#ERROR!
LAMP3	THAP9	0.65459	0	-0.22424	0.533401	-2.54502	0.010927	#ERROR!
DDX5	THAP9	0.773714	0	0.018182	0.96024	-2.54483	0.010933	#ERROR!
C10orf143	THAP9	0.617965	0	0.939394	5.48e-05	2.5444	0.010946	#ERROR!
PPP1R9B	THAP9	0.675597	0	-0.18788	0.603218	-2.54426	0.010951	#ERROR!
RNU6-272P	THAP9	0.14156	0.068872	-0.70065	0.024019	-2.54423	0.010952	0/-
FOXO1	THAP9	0.668641	0	-0.2	0.579584	-2.54403	0.010958	#ERROR!
NEK11	THAP9	0.707709	0	-0.12766	0.72525	-2.54385	0.010964	#ERROR!
MIOS	THAP9	0.805582	0	0.10303	0.776998	-2.54379	0.010966	#ERROR!
RMI1	THAP9	0.81396	0	0.127273	0.726057	-2.54321	0.010984	#ERROR!
ITGA8	THAP9	0.639235	0	-0.24848	0.488776	-2.54318	0.010985	#ERROR!
MMUT	THAP9	0.818046	0	0.139394	0.700932	-2.54293	0.010993	#ERROR!
RABGAP1L	THAP9	0.731348	0	-0.07879	0.828717	-2.54292	0.010993	#ERROR!
GCSIR	THAP9	0.316002	3.36e-05	-0.5933	0.070604	-2.54133	0.011043	#ERROR!
CTAGE4	THAP9	0.404092	6.7e-08	-0.52357	0.120381	-2.54091	0.011056	#ERROR!
LDLR	THAP9	0.597926	0	-0.30909	0.384841	-2.5401	0.011082	#ERROR!
LARS2	THAP9	0.687956	0	-0.16364	0.651477	-2.53943	0.011103	#ERROR!
KCNJ14	THAP9	0.476705	8.44e-11	-0.45455	0.186905	-2.53928	0.011108	#ERROR!
BOD1L1	THAP9	0.786973	0	0.054545	0.881036	-2.53854	0.011132	#ERROR!
GTF2IP14	THAP9	0.62549	0	-0.26802	0.454042	-2.53821	0.011142	#ERROR!
PTTG1	THAP9	0.630238	0	-0.26061	0.467089	-2.53788	0.011153	#ERROR!
RPL13AP26	THAP9	0.597354	0	-0.30909	0.384841	-2.53786	0.011153	#ERROR!
IL22RA1	THAP9	0.645506	0	-0.23636	0.510885	-2.53764	0.01116	#ERROR!
ATP8B1	THAP9	0.712763	0	-0.11515	0.75142	-2.53756	0.011163	#ERROR!
GAPDHP62	THAP9	0.558201	5.55e-15	-0.36111	0.305264	-2.53741	0.011168	#ERROR!
MACF1	THAP9	0.735852	0	-0.06667	0.854813	-2.5368	0.011187	#ERROR!
ATP5F1AP3	THAP9	-0.24148	0.001723	0.642085	0.045323	2.5366	0.011194	-/+
CHAMP1	THAP9	0.724385	0	-0.09091	0.802772	-2.53638	0.011201	#ERROR!
PHF13	THAP9	0.7912	0	0.066667	0.854813	-2.53611	0.011209	#ERROR!
MYO16-AS1	THAP9	0.096261	0.217302	-0.72175	0.018443	-2.53607	0.01121	0/-
MIR635	THAP9	0.577645	4.44e-16	-0.33537	0.343468	-2.53592	0.011215	#ERROR!
NPIPB4	THAP9	0.605292	0	-0.29697	0.404702	-2.53557	0.011227	#ERROR!
MCM3AP	THAP9	0.693599	0	-0.15152	0.676065	-2.53532	0.011235	#ERROR!
FAM9B	THAP9	0.095922	0.218932	-0.72175	0.018443	-2.53521	0.011238	0/-
CRYBB1	THAP9	0.259217	0.000745	0.854545	0.001637	2.53518	0.011239	#ERROR!
NSF	THAP9	0.767213	0	0.006061	0.986743	-2.53508	0.011242	#ERROR!
NRAS	THAP9	0.799915	0	0.090909	0.802772	-2.53447	0.011262	#ERROR!
RBM44	THAP9	0.652101	0	-0.22424	0.533401	-2.53409	0.011274	#ERROR!
MMAA	THAP9	0.812727	0	0.127273	0.726057	-2.53404	0.011276	#ERROR!
RN7SL363P	THAP9	0.234361	0.002372	-0.64578	0.043703	-2.53348	0.011294	#ERROR!
RAB11A	THAP9	0.776567	0	0.030303	0.933773	-2.5323	0.011332	#ERROR!
NUDT9	THAP9	0.871513	0	0.321212	0.365468	-2.53226	0.011333	#ERROR!
CHMP4A	THAP9	0.679712	0	-0.17576	0.627188	-2.53187	0.011346	#ERROR!
EIF1AD	THAP9	0.799483	0	0.090909	0.802772	-2.53146	0.011359	#ERROR!
HOXA1	THAP9	0.496091	1.07e-11	-0.43161	0.212945	-2.53138	0.011362	#ERROR!
HARS1	THAP9	0.745669	0	-0.04242	0.907364	-2.53036	0.011395	#ERROR!
CCNK	THAP9	0.717335	0	-0.10303	0.776998	-2.53024	0.011399	#ERROR!
RPL27P12	THAP9	0.086791	0.266192	0.797724	0.005692	2.52968	0.011417	0/+
RNF149	THAP9	0.771226	0	0.018182	0.96024	-2.52931	0.011429	#ERROR!
ALG8	THAP9	0.839761	0	0.212121	0.556306	-2.52882	0.011445	#ERROR!
HNRNPR	THAP9	0.794569	0	0.078788	0.828717	-2.52828	0.011462	#ERROR!
RPS10P13	THAP9	-0.13819	0.075821	0.699091	0.024471	2.52788	0.011475	0/+
GSPT1	THAP9	0.770922	0	0.018182	0.96024	-2.52742	0.01149	#ERROR!
DDX42	THAP9	0.785249	0	0.054545	0.881036	-2.52718	0.011498	#ERROR!
ARHGDIA	THAP9	0.642942	0	-0.23636	0.510885	-2.52661	0.011517	#ERROR!
INO80C	THAP9	0.733946	0	-0.06667	0.854813	-2.52637	0.011525	#ERROR!
CAST	THAP9	0.739349	0	-0.05455	0.881036	-2.52548	0.011554	#ERROR!
LIG1	THAP9	0.619232	0	-0.27273	0.445838	-2.52529	0.01156	#ERROR!
AP3D1	THAP9	0.64258	0	-0.23636	0.510885	-2.52506	0.011568	#ERROR!
LOC100421273	THAP9	0.490251	2.02e-11	-0.43562	0.208258	-2.52436	0.011591	#ERROR!
CTBP1	THAP9	0.704018	0	-0.12727	0.726057	-2.52434	0.011592	#ERROR!
DERL1	THAP9	0.798264	0	0.090909	0.802772	-2.52298	0.011636	#ERROR!
POLD3	THAP9	0.77989	0	0.042424	0.907364	-2.52296	0.011637	#ERROR!
MPZL2	THAP9	0.760111	0	-0.00606	0.986743	-2.52271	0.011646	#ERROR!
ARF4	THAP9	0.789186	0	0.066667	0.854813	-2.52262	0.011648	#ERROR!
BMP8B	THAP9	0.626523	0	-0.26061	0.467089	-2.52243	0.011655	#ERROR!
KRT8	THAP9	0.516438	1.06e-12	-0.40606	0.244282	-2.52224	0.011661	#ERROR!
MFSD6	THAP9	0.749575	0	-0.0303	0.933773	-2.5221	0.011666	#ERROR!
PRRC2C	THAP9	0.721507	0	-0.09091	0.802772	-2.5212	0.011695	#ERROR!
NLK	THAP9	0.802354	0	0.10303	0.776998	-2.52082	0.011708	#ERROR!
CDC42BPA	THAP9	0.703218	0	-0.12727	0.726057	-2.52035	0.011724	#ERROR!
CSNK1G3	THAP9	0.827174	0	0.175758	0.627188	-2.52014	0.011731	#ERROR!
LINC01553	THAP9	0.245052	0.001462	-0.63595	0.048104	-2.52004	0.011734	#ERROR!
JMY	THAP9	0.810777	0	0.127273	0.726057	-2.51965	0.011747	#ERROR!
RHBDD1	THAP9	0.819075	0	0.151515	0.676065	-2.51962	0.011748	#ERROR!
HTATIP2	THAP9	0.784048	0	0.054545	0.881036	-2.51932	0.011758	#ERROR!
RNU6-1278P	THAP9	0.371348	8.41e-07	-0.54495	0.103316	-2.51922	0.011761	#ERROR!
GBE1	THAP9	0.754292	0	-0.01818	0.96024	-2.51889	0.011773	#ERROR!
AGO2	THAP9	0.732549	0	-0.06667	0.854813	-2.51877	0.011777	#ERROR!
ANKRD12	THAP9	0.754261	0	-0.01818	0.96024	-2.51871	0.011779	#ERROR!
NKTR	THAP9	0.726816	0	-0.07879	0.828717	-2.51857	0.011783	#ERROR!
FAM86EP	THAP9	0.814727	0	0.139394	0.700932	-2.51789	0.011806	#ERROR!
CRACD	THAP9	0.525675	3.54e-13	-0.39394	0.259998	-2.51784	0.011808	#ERROR!
CDYL2	THAP9	0.662745	0	-0.2	0.579584	-2.51739	0.011823	#ERROR!
GEMIN5	THAP9	0.769247	0	0.018182	0.96024	-2.51706	0.011834	#ERROR!
MTHFD1	THAP9	0.732166	0	-0.06667	0.854813	-2.51669	0.011846	#ERROR!
C2-AS1	THAP9	0.377021	5.53e-07	-0.53936	0.10762	-2.5159	0.011873	#ERROR!
CCNB2	THAP9	0.591524	0	-0.30909	0.384841	-2.51518	0.011897	#ERROR!
MLXIP	THAP9	0.6246	0	-0.26061	0.467089	-2.51448	0.011921	#ERROR!
RHOXF1	THAP9	0.24364	0.001561	0.847685	0.001951	2.51438	0.011924	#ERROR!
CHD4	THAP9	0.737322	0	-0.05455	0.881036	-2.51427	0.011928	#ERROR!
ALG6	THAP9	0.818354	0	0.151515	0.676065	-2.51411	0.011933	#ERROR!
MTND5P14	THAP9	0.17853	0.021373	-0.6742	0.032516	-2.51347	0.011955	#ERROR!
ATP9A	THAP9	0.688995	0	-0.15152	0.676065	-2.51312	0.011967	#ERROR!
MYO5C	THAP9	0.682373	0	-0.16364	0.651477	-2.51295	0.011973	#ERROR!
ALKBH6	THAP9	0.616084	0	-0.27273	0.445838	-2.51248	0.011988	#ERROR!
PIKFYVE	THAP9	0.77338	0	0.030303	0.933773	-2.51222	0.011998	#ERROR!
AOAH-IT1	THAP9	0.483073	4.35e-11	-0.43926	0.20404	-2.51204	0.012004	#ERROR!
BDP1	THAP9	0.792129	0	0.078788	0.828717	-2.51171	0.012015	#ERROR!
AARS2	THAP9	0.701332	0	-0.12727	0.726057	-2.51099	0.012039	#ERROR!
EXOSC6	THAP9	0.713544	0	-0.10303	0.776998	-2.51069	0.012049	#ERROR!
RPL5P14	THAP9	0.136623	0.079224	0.812777	0.004259	2.51046	0.012057	0/+
RPL7P16	THAP9	0.474146	1.1e-10	-0.44789	0.194263	-2.50992	0.012076	#ERROR!
MYH15	THAP9	0.562943	2.89e-15	-0.34545	0.328227	-2.50979	0.01208	#ERROR!
MAP2K4	THAP9	0.805093	0	0.115152	0.75142	-2.50941	0.012093	#ERROR!
OTULIN	THAP9	0.772815	0	0.030303	0.933773	-2.50868	0.012118	#ERROR!
GALNT2	THAP9	0.706925	0	-0.11515	0.75142	-2.50795	0.012143	#ERROR!
PPID	THAP9	0.858975	0	0.284848	0.425038	-2.50743	0.012161	#ERROR!
RALGAPA1P1	THAP9	0.752231	0	-0.01818	0.96024	-2.5069	0.012179	#ERROR!
ITGA2	THAP9	0.706627	0	-0.11515	0.75142	-2.50645	0.012195	#ERROR!
HUWE1	THAP9	0.730004	0	-0.06667	0.854813	-2.505	0.012245	#ERROR!
HSH2D	THAP9	0.652768	0	-0.21212	0.556306	-2.50499	0.012245	#ERROR!
ACTN4	THAP9	0.637676	0	-0.23636	0.510885	-2.50416	0.012274	#ERROR!
CHRNA1	THAP9	0.372635	7.65e-07	-0.53939	0.107593	-2.50318	0.012308	#ERROR!
NACA3P	THAP9	0.551441	1.38e-14	-0.35758	0.310376	-2.50261	0.012328	#ERROR!
EDRF1	THAP9	0.799738	0	0.10303	0.776998	-2.50245	0.012334	#ERROR!
LINC02623	THAP9	0.055281	0.479313	0.781736	0.007558	2.50243	0.012334	0/+
RPL8P4	THAP9	-0.42449	1.2e-08	0.493912	0.1468	2.50216	0.012344	-/0
LINC02035	THAP9	0.723723	0	-0.07879	0.828717	-2.50215	0.012344	#ERROR!
NAA50	THAP9	0.756634	0	-0.00606	0.986743	-2.50211	0.012345	#ERROR!
RPA4	THAP9	0.556528	7.11e-15	-0.35081	0.320274	-2.50161	0.012363	#ERROR!
CAMKK2	THAP9	0.799617	0	0.10303	0.776998	-2.5016	0.012363	#ERROR!
IGKV2-10	THAP9	-0.13319	0.087125	0.696311	0.025293	2.50146	0.012368	0/+
ARMH3	THAP9	0.790605	0	0.078788	0.828717	-2.50145	0.012369	#ERROR!
AARSD1	THAP9	0.804096	0	0.115502	0.750683	-2.50141	0.01237	#ERROR!
IFIH1	THAP9	0.705547	0	-0.11515	0.75142	-2.50103	0.012383	#ERROR!
AIFM2	THAP9	0.596518	0	-0.29697	0.404702	-2.50101	0.012384	#ERROR!
RECQL5	THAP9	0.745862	0	-0.0303	0.933773	-2.5009	0.012388	#ERROR!
RFK	THAP9	0.756416	0	-0.00606	0.986743	-2.50083	0.01239	#ERROR!
EIF3A	THAP9	0.761504	0	0.006061	0.986743	-2.50053	0.012401	#ERROR!
PNPLA1	THAP9	0.268566	0.000468	-0.61587	0.057992	-2.5003	0.012409	#ERROR!
GALM	THAP9	0.699124	0	-0.12727	0.726057	-2.50009	0.012416	#ERROR!
GCC1	THAP9	0.751048	0	-0.01818	0.96024	-2.50006	0.012417	#ERROR!
PTPN11	THAP9	0.790387	0	0.078788	0.828717	-2.49999	0.01242	#ERROR!
KDM7A	THAP9	0.785752	0	0.066667	0.854813	-2.49987	0.012424	#ERROR!
DNAJA4	THAP9	0.705264	0	-0.11515	0.75142	-2.49961	0.012433	#ERROR!
ITPR3	THAP9	0.520385	6.67e-13	-0.39394	0.259998	-2.49952	0.012436	#ERROR!
RASAL2-AS1	THAP9	0.672573	0	-0.17576	0.627188	-2.49877	0.012462	#ERROR!
CASP10	THAP9	0.604228	0	-0.28485	0.425038	-2.49802	0.012489	#ERROR!
AQP12B	THAP9	0.368384	1.04e-06	-0.54104	0.106318	-2.49662	0.012538	#ERROR!
RDH11	THAP9	0.745072	0	-0.0303	0.933773	-2.49643	0.012545	#ERROR!
LOC105370941	THAP9	0.587362	0	-0.30773	0.387049	-2.49534	0.012584	#ERROR!
BAZ1B	THAP9	0.770664	0	0.030303	0.933773	-2.4953	0.012585	#ERROR!
HEATR5B	THAP9	0.815759	0	0.151515	0.676065	-2.49447	0.012615	#ERROR!
BRAP	THAP9	0.793994	0	0.090909	0.802772	-2.49364	0.012644	#ERROR!
HAUS7	THAP9	0.657373	0	-0.2	0.579584	-2.49343	0.012651	#ERROR!
RPL21P94	THAP9	0.464531	2.89e-10	-0.45238	0.189275	-2.49308	0.012664	#ERROR!
N4BP1	THAP9	0.733447	0	-0.05455	0.881036	-2.49303	0.012666	#ERROR!
ARID2	THAP9	0.765212	0	0.018182	0.96024	-2.49238	0.012689	#ERROR!
NOC2L	THAP9	0.642456	0	-0.22424	0.533401	-2.49232	0.012691	#ERROR!
MTRNR2L4	THAP9	0.553547	1.02e-14	-0.35131	0.319544	-2.4922	0.012696	#ERROR!
OR2B11	THAP9	0.102142	0.190368	0.797863	0.005677	2.49167	0.012714	0/+
INPP5J	THAP9	0.410858	3.84e-08	-0.50303	0.138334	-2.49115	0.012733	#ERROR!
ATM	THAP9	0.806857	0	0.127273	0.726057	-2.49113	0.012734	#ERROR!
PHF6	THAP9	0.823484	0	0.175758	0.627188	-2.49102	0.012738	#ERROR!
ILF3	THAP9	0.738637	0	-0.04242	0.907364	-2.49096	0.01274	#ERROR!
DCAF1	THAP9	0.764945	0	0.018182	0.96024	-2.49076	0.012747	#ERROR!
RPL13AP6	THAP9	0.121913	0.11765	0.804893	0.004973	2.49073	0.012748	0/+
NUP93	THAP9	0.697087	0	-0.12727	0.726057	-2.49009	0.012771	#ERROR!
MADD	THAP9	0.759739	0	0.006061	0.986743	-2.48999	0.012775	#ERROR!
CA8	THAP9	0.186245	0.016282	0.826752	0.00318	2.48949	0.012793	#ERROR!
ERG28	THAP9	0.74918	0	-0.01818	0.96024	-2.48931	0.012799	#ERROR!
GLCCI1	THAP9	0.759482	0	0.006061	0.986743	-2.48846	0.01283	#ERROR!
EIF2B5	THAP9	0.743626	0	-0.0303	0.933773	-2.48827	0.012837	#ERROR!
PTCH1	THAP9	0.696655	0	-0.12727	0.726057	-2.48798	0.012847	#ERROR!
ERRFI1	THAP9	0.633813	0	-0.23636	0.510885	-2.48784	0.012852	#ERROR!
PUM1	THAP9	0.79314	0	0.090909	0.802772	-2.48783	0.012852	#ERROR!
DEPDC1B	THAP9	0.696602	0	-0.12727	0.726057	-2.48772	0.012856	#ERROR!
ARL15	THAP9	0.774285	0	0.042424	0.907364	-2.48736	0.01287	#ERROR!
PTPRB	THAP9	0.769335	0	0.030303	0.933773	-2.48709	0.012879	#ERROR!
ENTPD5	THAP9	0.575202	4.44e-16	-0.32121	0.365468	-2.48678	0.012891	#ERROR!
DESI2	THAP9	0.764246	0	0.018182	0.96024	-2.48653	0.0129	#ERROR!
LOC100127892	THAP9	0.56289	2.89e-15	-0.33735	0.340451	-2.4865	0.0129	#ERROR!
OPA3	THAP9	0.689764	0	-0.13939	0.700932	-2.48565	0.012931	#ERROR!
RNU6-190P	THAP9	0.216097	0.005169	-0.64578	0.043703	-2.48506	0.012953	#ERROR!
CPSF7	THAP9	0.818634	0	0.163636	0.651477	-2.48497	0.012956	#ERROR!
HSPD1	THAP9	0.797218	0	0.10303	0.776998	-2.48495	0.012957	#ERROR!
RPL13AP5	THAP9	0.032109	0.681313	0.769697	0.009222	2.48477	0.012963	0/+
EAF1	THAP9	0.773606	0	0.042424	0.907364	-2.48309	0.013025	#ERROR!
MAST4	THAP9	0.731615	0	-0.05455	0.881036	-2.48308	0.013025	#ERROR!
GIGYF2	THAP9	0.778381	0	0.054545	0.881036	-2.48272	0.013038	#ERROR!
OCSTAMP	THAP9	0.217953	0.004789	0.83611	0.002577	2.48259	0.013043	#ERROR!
HNRNPAB	THAP9	0.695459	0	-0.12727	0.726057	-2.48214	0.01306	#ERROR!
CBL	THAP9	0.747871	0	-0.01818	0.96024	-2.48182	0.013071	#ERROR!
GGT3P	THAP9	0.379074	4.74e-07	-0.52778	0.11689	-2.4812	0.013094	#ERROR!
NFATC2IP	THAP9	0.713763	0	-0.09091	0.802772	-2.48102	0.013101	#ERROR!
LRRFIP1	THAP9	0.701414	0	-0.11515	0.75142	-2.48044	0.013122	#ERROR!
RPL7AP65	THAP9	0.106277	0.172946	0.797724	0.005692	2.48019	0.013131	0/+
NAIF1	THAP9	0.701356	0	-0.11515	0.75142	-2.48015	0.013133	#ERROR!
KDM2B	THAP9	0.747568	0	-0.01818	0.96024	-2.48009	0.013135	#ERROR!
CNOT1	THAP9	0.731002	0	-0.05455	0.881036	-2.47977	0.013147	#ERROR!
KCNJ2	THAP9	0.573108	6.66e-16	-0.32121	0.365468	-2.47892	0.013178	#ERROR!
AGFG1	THAP9	0.777642	0	0.054545	0.881036	-2.47801	0.013212	#ERROR!
CKMT1B	THAP9	0.445364	1.83e-09	-0.46667	0.173939	-2.47783	0.013219	#ERROR!
AAGAB	THAP9	0.736234	0	-0.04242	0.907364	-2.4777	0.013223	#ERROR!
DARS2	THAP9	0.777535	0	0.054545	0.881036	-2.47733	0.013237	#ERROR!
LEF1	THAP9	0.590342	0	-0.29697	0.404702	-2.47702	0.013248	#ERROR!
MTMR2	THAP9	0.78693	0	0.078788	0.828717	-2.47698	0.01325	#ERROR!
LINC02620	THAP9	0.077904	0.318447	0.786567	0.006954	2.47681	0.013256	0/+
CARD10	THAP9	0.51377	1.45e-12	-0.39394	0.259998	-2.47679	0.013257	#ERROR!
RPL37AP3	THAP9	0.123259	0.113623	-0.69631	0.025293	-2.47604	0.013285	0/-
COG1	THAP9	0.77245	0	0.042424	0.907364	-2.47587	0.013291	#ERROR!
ARHGAP12	THAP9	0.817434	0	0.163636	0.651477	-2.47584	0.013292	#ERROR!
CDKN2B	THAP9	0.543974	3.6e-14	-0.35758	0.310376	-2.47577	0.013295	#ERROR!
BCLAF1P2	THAP9	0.52521	3.74e-13	-0.38021	0.27845	-2.47559	0.013302	#ERROR!
PTGFRN	THAP9	0.724487	0	-0.06667	0.854813	-2.47553	0.013304	#ERROR!
RELL1	THAP9	0.418963	1.93e-08	-0.49091	0.149656	-2.47528	0.013313	#ERROR!
OGDH	THAP9	0.614807	0	-0.26061	0.467089	-2.47447	0.013343	#ERROR!
GRAMD2A	THAP9	0.571902	8.88e-16	-0.32121	0.365468	-2.4744	0.013346	#ERROR!
C16orf87	THAP9	0.804498	0	0.127273	0.726057	-2.47421	0.013353	#ERROR!
RNPEP	THAP9	0.660156	0	-0.18788	0.603218	-2.47411	0.013357	#ERROR!
ETF1	THAP9	0.741098	0	-0.0303	0.933773	-2.4741	0.013357	#ERROR!
CCDC15	THAP9	0.788845	0	0.085107	0.815172	-2.47367	0.013373	#ERROR!
DHX33	THAP9	0.75697	0	0.006061	0.986743	-2.47359	0.013376	#ERROR!
DKC1	THAP9	0.812954	0	0.151515	0.676065	-2.47351	0.013379	#ERROR!
JUP	THAP9	0.533412	1.37e-13	-0.3697	0.29305	-2.47348	0.013381	#ERROR!
GDI2	THAP9	0.7769	0	0.054545	0.881036	-2.4733	0.013387	#ERROR!
LINC02003	THAP9	0.368778	1.01e-06	-0.53403	0.111829	-2.47296	0.0134	#ERROR!
RBM33	THAP9	0.77196	0	0.042424	0.907364	-2.47281	0.013405	#ERROR!
ARL17A	THAP9	0.751553	0	-0.00606	0.986743	-2.47247	0.013418	#ERROR!
CFAP45	THAP9	0.629897	0	-0.23636	0.510885	-2.47144	0.013457	#ERROR!
ISG20L2	THAP9	0.751269	0	-0.00606	0.986743	-2.47083	0.01348	#ERROR!
ABAT	THAP9	0.613901	0	-0.26061	0.467089	-2.47081	0.013481	#ERROR!
ENTPD7	THAP9	0.699447	0	-0.11515	0.75142	-2.47073	0.013484	#ERROR!
PIGA	THAP9	0.820852	0	0.175758	0.627188	-2.47058	0.01349	#ERROR!
HAUS3	THAP9	0.868849	0	0.333333	0.346594	-2.4705	0.013493	#ERROR!
PRC1	THAP9	0.666282	0	-0.17576	0.627188	-2.47009	0.013508	#ERROR!
PLCE1	THAP9	0.692717	0	-0.12727	0.726057	-2.46883	0.013556	#ERROR!
ARHGAP32	THAP9	0.740149	0	-0.0303	0.933773	-2.46881	0.013556	#ERROR!
FRMD4B	THAP9	0.686083	0	-0.13939	0.700932	-2.46807	0.013584	#ERROR!
MEP1A	THAP9	0.389096	2.21e-07	-0.51515	0.127553	-2.46713	0.01362	#ERROR!
EGLN1	THAP9	0.753251	0	0	1	-2.46707	0.013622	#ERROR!
MIR4685	THAP9	0.209225	0.006824	-0.64578	0.043703	-2.46695	0.013627	#ERROR!
FBXL19-AS1	THAP9	0.643882	0	-0.21212	0.556306	-2.46642	0.013647	#ERROR!
RAI14	THAP9	0.698524	0	-0.11515	0.75142	-2.46619	0.013656	#ERROR!
NHLRC2	THAP9	0.828322	0	0.2	0.579584	-2.46607	0.01366	#ERROR!
CCDC43	THAP9	0.824312	0	0.187879	0.603218	-2.46596	0.013665	#ERROR!
CCDC86	THAP9	0.739583	0	-0.0303	0.933773	-2.46566	0.013676	#ERROR!
AHCYP2	THAP9	-0.44871	1.34e-09	0.459447	0.181595	2.46521	0.013693	-/0
C16orf72	THAP9	0.760583	0	0.018182	0.96024	-2.46451	0.01372	#ERROR!
RPL10P15	THAP9	0.4011	8.54e-08	0.886259	0.000637	2.46411	0.013735	#ERROR!
RNASE1	THAP9	0.327759	1.63e-05	0.866667	0.001174	2.46401	0.013739	#ERROR!
LINC02204	THAP9	0.486328	3.08e-11	-0.42023	0.226603	-2.46401	0.013739	#ERROR!
KLHDC10	THAP9	0.794079	0	0.10303	0.776998	-2.46342	0.013762	#ERROR!
PFN2	THAP9	0.419867	1.79e-08	0.890909	0.000542	2.46293	0.013781	#ERROR!
EDEM3	THAP9	0.716211	0	-0.07879	0.828717	-2.46291	0.013782	#ERROR!
ATF6	THAP9	0.760303	0	0.018182	0.96024	-2.46284	0.013784	#ERROR!
PRKACB	THAP9	0.637615	0	0.939394	5.48e-05	2.46278	0.013786	#ERROR!
AXIN1	THAP9	0.635497	0	-0.22424	0.533401	-2.46273	0.013788	#ERROR!
PURB	THAP9	0.784743	0	0.078788	0.828717	-2.46259	0.013794	#ERROR!
PARG	THAP9	0.784671	0	0.078788	0.828717	-2.46212	0.013812	#ERROR!
RB1	THAP9	0.700956	0	0.951515	2.28e-05	2.46191	0.01382	#ERROR!
ORC1	THAP9	0.487494	2.72e-11	-0.41818	0.229113	-2.4616	0.013832	#ERROR!
ADH1C	THAP9	0.071698	0.358639	0.781818	0.007547	2.46149	0.013836	0/+
MOGS	THAP9	0.733251	0	-0.04242	0.907364	-2.46139	0.01384	#ERROR!
ABL2	THAP9	0.733219	0	-0.04242	0.907364	-2.46122	0.013847	#ERROR!
RNASEH1P2	THAP9	0.066659	0.393491	-0.72175	0.018443	-2.46108	0.013852	0/-
CDC25B	THAP9	0.372774	7.57e-07	-0.52727	0.117308	-2.46096	0.013857	#ERROR!
DYNC2I1	THAP9	0.7981	0	0.115152	0.75142	-2.46018	0.013887	#ERROR!
BEND3	THAP9	0.663695	0	-0.17629	0.626123	-2.45981	0.013901	#ERROR!
MPZL1	THAP9	0.759758	0	0.018182	0.96024	-2.4596	0.013909	#ERROR!
ICOSLG	THAP9	0.567829	1.33e-15	-0.32121	0.365468	-2.45922	0.013924	#ERROR!
CCT6A	THAP9	0.819351	0	0.175758	0.627188	-2.45904	0.013931	#ERROR!
DDX19B	THAP9	0.769684	0	0.042424	0.907364	-2.4587	0.013944	#ERROR!
DOCK7	THAP9	0.784132	0	0.078788	0.828717	-2.45859	0.013948	#ERROR!
PRAG1	THAP9	0.497587	9.09e-12	-0.40606	0.244282	-2.45839	0.013956	#ERROR!
MTND1P23	THAP9	0.293451	0.000124	-0.58788	0.073878	-2.45783	0.013978	#ERROR!
HNRNPL	THAP9	0.797758	0	0.115152	0.75142	-2.45781	0.013979	#ERROR!
MIR571	THAP9	0.262553	0.000632	-0.60927	0.061509	-2.45746	0.013992	#ERROR!
EIF4H	THAP9	0.748898	0	-0.00606	0.986743	-2.45719	0.014003	#ERROR!
RPL9P16	THAP9	-0.17868	0.021261	0.661724	0.037152	2.45717	0.014004	-/+
AQR	THAP9	0.759334	0	0.018182	0.96024	-2.45708	0.014007	#ERROR!
CLDN7	THAP9	0.593688	0	-0.28485	0.425038	-2.45666	0.014023	#ERROR!
LINC00507	THAP9	0.105431	0.176411	0.793939	0.0061	2.45637	0.014035	0/+
MDM2	THAP9	0.759153	0	0.018182	0.96024	-2.456	0.014049	#ERROR!
RAB40AL	THAP9	0.377048	5.52e-07	-0.52223	0.121503	-2.45597	0.01405	#ERROR!
AP5B1	THAP9	0.601847	0	-0.27273	0.445838	-2.45554	0.014067	#ERROR!
LTV1	THAP9	0.822913	0	0.187879	0.603218	-2.45501	0.014088	#ERROR!
MIEF1	THAP9	0.758979	0	0.018182	0.96024	-2.45496	0.01409	#ERROR!
MTCH2	THAP9	0.822896	0	0.187879	0.603218	-2.45488	0.014093	#ERROR!
GNB1	THAP9	0.720408	0	-0.06667	0.854813	-2.45406	0.014125	#ERROR!
ARFGEF3	THAP9	0.676451	0	-0.15152	0.676065	-2.454	0.014128	#ERROR!
KIF5B	THAP9	0.773776	0	0.054545	0.881036	-2.45358	0.014144	#ERROR!
FANCA	THAP9	0.575274	4.44e-16	-0.30909	0.384841	-2.45318	0.01416	#ERROR!
LOC101928728	THAP9	0.70214	0	-0.10303	0.776998	-2.45317	0.01416	#ERROR!
DMXL1	THAP9	0.796971	0	0.115152	0.75142	-2.45238	0.014191	#ERROR!
CYB5B	THAP9	0.725751	0	-0.05455	0.881036	-2.45162	0.014221	#ERROR!
OTUD3	THAP9	0.689098	0	-0.12727	0.726057	-2.4514	0.01423	#ERROR!
C3orf49	THAP9	0.611998	0	-0.2561	0.475097	-2.451	0.014246	#ERROR!
MTPAP	THAP9	0.809884	0	0.151515	0.676065	-2.45089	0.01425	#ERROR!
CNOT2	THAP9	0.805494	0	0.139394	0.700932	-2.45028	0.014274	#ERROR!
DYRK1A	THAP9	0.742216	0	-0.01818	0.96024	-2.44984	0.014292	#ERROR!
ESCO2	THAP9	0.632181	0	-0.22424	0.533401	-2.44878	0.014334	#ERROR!
APOL2	THAP9	0.564863	2.22e-15	-0.32121	0.365468	-2.44824	0.014356	#ERROR!
PIGM	THAP9	0.813678	0	0.163636	0.651477	-2.44761	0.014381	#ERROR!
RPL7P39	THAP9	0.373836	7.01e-07	-0.52223	0.121503	-2.44657	0.014422	#ERROR!
GBF1	THAP9	0.667963	0	-0.16364	0.651477	-2.4463	0.014433	#ERROR!
NUP62	THAP9	0.681372	0	-0.13939	0.700932	-2.44581	0.014453	#ERROR!
CTSA	THAP9	0.623708	0	-0.23636	0.510885	-2.44578	0.014454	#ERROR!
GP1BA	THAP9	0.447424	1.51e-09	-0.45455	0.186905	-2.44558	0.014462	#ERROR!
CRHBP	THAP9	0.378873	4.82e-07	0.878788	0.000814	2.44505	0.014483	#ERROR!
DENND5B	THAP9	0.660651	0	-0.17576	0.627188	-2.44478	0.014494	#ERROR!
PAWR	THAP9	0.817466	0	0.175758	0.627188	-2.44467	0.014498	#ERROR!
CCDC162P	THAP9	0.54483	3.24e-14	-0.34545	0.328227	-2.44403	0.014524	#ERROR!
DDX19A	THAP9	0.786571	0	0.090909	0.802772	-2.44388	0.01453	#ERROR!
RPL34P5	THAP9	-0.58823	0	0.28764	0.420312	2.4432	0.014558	-/0
QSER1	THAP9	0.800104	0	0.127273	0.726057	-2.44318	0.014558	#ERROR!
OPA1	THAP9	0.751666	0	0.006061	0.986743	-2.44262	0.014581	#ERROR!
LSM12	THAP9	0.80441	0	0.139394	0.700932	-2.44253	0.014585	#ERROR!
PLPBP	THAP9	0.761992	0	0.030303	0.933773	-2.44243	0.014589	#ERROR!
RNU7-149P	THAP9	0.134372	0.084344	-0.68335	0.029377	-2.44224	0.014597	0/-
PTER	THAP9	0.786321	0	0.090909	0.802772	-2.44223	0.014597	#ERROR!
NUP214	THAP9	0.72394	0	-0.05455	0.881036	-2.44202	0.014605	#ERROR!
KCNK5	THAP9	0.562922	2.89e-15	-0.32121	0.365468	-2.44107	0.014644	#ERROR!
COG4	THAP9	0.711881	0	-0.07879	0.828717	-2.44067	0.01466	#ERROR!
DOCK1	THAP9	0.751325	0	0.006061	0.986743	-2.44065	0.014661	#ERROR!
PRSS33	THAP9	0.217751	0.004829	0.830868	0.002903	2.43992	0.014691	#ERROR!
IGLV3-27	THAP9	0.049917	0.523037	0.769697	0.009222	2.43989	0.014692	0/+
AKAP8	THAP9	0.766543	0	0.042424	0.907364	-2.43942	0.014711	#ERROR!
RNF157	THAP9	0.491828	1.71e-11	-0.40606	0.244282	-2.4392	0.01472	#ERROR!
ERCC6	THAP9	0.799501	0	0.127273	0.726057	-2.43897	0.014729	#ERROR!
MASTL	THAP9	0.790241	0	0.10303	0.776998	-2.43749	0.014789	#ERROR!
ATXN1	THAP9	0.750749	0	0.006061	0.986743	-2.43732	0.014796	#ERROR!
MEN1	THAP9	0.739921	0	-0.01818	0.96024	-2.43703	0.014809	#ERROR!
KRT18P41	THAP9	0.328613	1.54e-05	-0.55612	0.095044	-2.43698	0.01481	#ERROR!
RNF26	THAP9	0.704885	0	-0.09091	0.802772	-2.43606	0.014848	#ERROR!
RPL36P12	THAP9	-0.61226	0	0.250122	0.485822	2.43599	0.014851	-/0
CRY1	THAP9	0.770947	0	0.054545	0.881036	-2.43594	0.014853	#ERROR!
CASP9	THAP9	0.692247	0	-0.11515	0.75142	-2.4356	0.014867	#ERROR!
PANX1	THAP9	0.775776	0	0.066667	0.854813	-2.43556	0.014869	#ERROR!
CACUL1	THAP9	0.836321	0	0.236364	0.510885	-2.43551	0.014871	#ERROR!
HNRNPA1P33	THAP9	0.588182	0	-0.28485	0.425038	-2.43538	0.014876	#ERROR!
CORO2A	THAP9	0.621139	0	-0.23636	0.510885	-2.43523	0.014882	#ERROR!
MIR576	THAP9	0.254137	0.000953	-0.60927	0.061509	-2.43477	0.014901	#ERROR!
DGKA	THAP9	0.490312	2.01e-11	-0.40606	0.244282	-2.43418	0.014926	#ERROR!
GOLIM4	THAP9	0.750166	0	0.006061	0.986743	-2.43397	0.014934	#ERROR!
NCSTN	THAP9	0.755384	0	0.018182	0.96024	-2.43377	0.014943	#ERROR!
CHERP	THAP9	0.691831	0	-0.11515	0.75142	-2.43359	0.01495	#ERROR!
LINC00216	THAP9	0.648841	0	-0.19139	0.596334	-2.43347	0.014955	#ERROR!
KRT18	THAP9	0.596097	0	-0.27273	0.445838	-2.43298	0.014975	#ERROR!
NPC1	THAP9	0.62839	0	-0.22424	0.533401	-2.43295	0.014976	#ERROR!
BEST4	THAP9	0.230422	0.002821	-0.62424	0.053718	-2.43218	0.015008	#ERROR!
GAS5	THAP9	0.58643	0	0.927273	0.000112	2.43168	0.015029	#ERROR!
C5orf51	THAP9	0.819782	0	0.187879	0.603218	-2.4308	0.015066	#ERROR!
PPP4R1	THAP9	0.71588	0	-0.06667	0.854813	-2.43053	0.015077	#ERROR!
BCAR3	THAP9	0.671347	0	-0.15152	0.676065	-2.43047	0.015079	#ERROR!
NACA2	THAP9	-0.34333	5.94e-06	0.542693	0.10504	2.43033	0.015085	-/0
NUP133	THAP9	0.793673	0	0.115152	0.75142	-2.42979	0.015107	#ERROR!
ABHD18	THAP9	0.881407	0	0.393939	0.259998	-2.42972	0.01511	#ERROR!
IFT46	THAP9	0.707622	0	0.951515	2.28e-05	2.42862	0.015156	#ERROR!
[truncated: 18,396 more rows]

## Sheet: STAD
Gene1	Gene2	TCGA_STAD.PrimarySolidTumor_cor	TCGA_STAD.PrimarySolidTumor_pVal	TCGA_STAD.SolidTissueNormal_cor	TCGA_STAD.SolidTissueNormal_pVal	zScoreDiff	pValDiff	Classes
FZD7	THAP9	0.16236	0.001608	0.891862	7.4e-12	6.38369	1.73e-10	#ERROR!
CPNE8	THAP9	0.201525	8.5e-05	0.895161	4.75e-12	6.26203	3.8e-10	#ERROR!
SLC39A10	THAP9	0.596226	0	0.956012	0	6.0963	1.09e-09	#ERROR!
PRRX1	THAP9	0.076717	0.138113	0.854106	5.08e-10	6.01655	1.78e-09	0/+
ARHGAP20	THAP9	0.123096	0.017086	0.864711	1.76e-10	5.98498	2.16e-09	#ERROR!
SRFBP1	THAP9	0.537892	0	0.945015	4.44e-16	5.95371	2.62e-09	#ERROR!
CD47	THAP9	0.392821	2.66e-15	0.920088	9.59e-14	5.9168	3.28e-09	#ERROR!
MDFIC	THAP9	0.212763	3.27e-05	0.881965	2.57e-11	5.88663	3.94e-09	#ERROR!
COL5A3	THAP9	0.091645	0.07631	0.848974	8.23e-10	5.84674	5.01e-09	0/+
LINC01239	THAP9	0.157914	0.002162	0.864374	1.83e-10	5.7993	6.66e-09	#ERROR!
RGPD8	THAP9	0.463521	0	0.928958	1.73e-14	5.78821	7.11e-09	#ERROR!
SLITRK4	THAP9	0.081266	0.11617	0.839047	1.99e-09	5.72551	1.03e-08	0/+
RPS6KA6	THAP9	0.132505	0.010208	0.853424	5.42e-10	5.71964	1.07e-08	#ERROR!
THSD1	THAP9	0.257498	4.3e-07	0.88506	1.76e-11	5.71909	1.07e-08	#ERROR!
RNLS	THAP9	-0.03321	0.521472	0.800733	3.73e-08	5.71228	1.11e-08	0/+
MACROH2A2	THAP9	0.11627	0.024342	0.84824	8.81e-10	5.70813	1.14e-08	#ERROR!
FHL5	THAP9	0.266571	1.61e-07	0.88563	1.64e-11	5.68332	1.32e-08	#ERROR!
P2RX7	THAP9	0.060736	0.240675	0.829698	4.35e-09	5.67441	1.39e-08	0/+
FAM162B	THAP9	0.139613	0.006772	0.852507	5.92e-10	5.66621	1.46e-08	#ERROR!
AFAP1L1	THAP9	0.278248	4.28e-08	0.886628	1.45e-11	5.64317	1.67e-08	#ERROR!
HAUS6	THAP9	0.646224	0	0.954912	0	5.62201	1.89e-08	#ERROR!
ALG10B	THAP9	0.504045	0	0.931452	1.04e-14	5.61483	1.97e-08	#ERROR!
PPP2R2B	THAP9	0.01783	0.730726	0.811366	1.77e-08	5.60804	2.05e-08	0/+
ANOS1	THAP9	0.186859	0.000274	0.862249	2.27e-10	5.60696	2.06e-08	#ERROR!
RNF217-AS1	THAP9	0.114151	0.027079	0.84029	1.79e-09	5.57947	2.41e-08	#ERROR!
FAM181B	THAP9	-0.02993	0.563452	0.791567	6.86e-08	5.5696	2.55e-08	0/+
NR3C1	THAP9	0.26816	1.35e-07	0.880865	2.93e-11	5.56549	2.61e-08	#ERROR!
NLGN1	THAP9	0.060696	0.240982	0.822473	7.71e-09	5.55998	2.7e-08	0/+
ST6GAL2	THAP9	0.045522	0.379379	0.81639	1.22e-08	5.54337	2.97e-08	0/+
CALHM5	THAP9	0.158721	0.00205	0.849968	7.51e-10	5.5213	3.37e-08	#ERROR!
ADCY4	THAP9	0.319528	2.39e-10	0.890762	8.54e-12	5.51385	3.51e-08	#ERROR!
FAM13C	THAP9	0.20982	4.22e-05	0.863166	2.07e-10	5.50459	3.7e-08	#ERROR!
NAV3	THAP9	0.132028	0.010486	0.84114	1.66e-09	5.50263	3.74e-08	#ERROR!
TRNT1	THAP9	0.575859	0	0.940885	1.33e-15	5.48856	4.05e-08	#ERROR!
LTN1	THAP9	0.632007	0	0.950147	0	5.48388	4.16e-08	#ERROR!
STEAP4	THAP9	0.164759	0.001366	0.849418	7.9e-10	5.4801	4.25e-08	#ERROR!
SNTG2	THAP9	0.109647	0.033785	0.832783	3.38e-09	5.47645	4.34e-08	#ERROR!
SYT15	THAP9	0.145023	0.004895	0.842868	1.43e-09	5.46578	4.61e-08	#ERROR!
MAP1LC3C	THAP9	0.064386	0.213512	0.817165	1.16e-08	5.45976	4.77e-08	0/+
FEM1A	THAP9	0.316312	3.69e-10	0.885976	1.57e-11	5.41747	6.04e-08	#ERROR!
GTPBP10	THAP9	0.561088	0	0.936584	3.33e-15	5.41599	6.1e-08	#ERROR!
GPNMB	THAP9	0.051922	0.315966	0.809018	2.1e-08	5.40164	6.6e-08	0/+
TOGARAM1	THAP9	0.522173	0	0.928886	1.78e-14	5.39494	6.85e-08	#ERROR!
CSRNP3	THAP9	0.332701	3.83e-11	0.888909	1.09e-11	5.39474	6.86e-08	#ERROR!
DSE	THAP9	0.220263	1.68e-05	0.860312	2.76e-10	5.39358	6.91e-08	#ERROR!
KRT222	THAP9	0.083611	0.105975	0.819032	1e-08	5.39082	7.01e-08	0/+
DCLK1	THAP9	0.125773	0.014804	0.832111	3.58e-09	5.38304	7.32e-08	#ERROR!
RNF144A	THAP9	0.300054	3.06e-09	0.879765	3.34e-11	5.36607	8.05e-08	#ERROR!
BBS10	THAP9	0.501897	0	0.92412	4.53e-14	5.36379	8.15e-08	#ERROR!
HCFC2	THAP9	0.44328	0	0.912107	3.79e-13	5.35834	8.4e-08	#ERROR!
STYX	THAP9	0.561617	0	0.935117	4.66e-15	5.35261	8.67e-08	#ERROR!
ETAA1	THAP9	0.708428	0	0.959677	0	5.32899	9.88e-08	#ERROR!
CYYR1	THAP9	0.219928	1.73e-05	0.856672	3.96e-10	5.32562	1.01e-07	#ERROR!
LOC441666	THAP9	0.260307	3.18e-07	0.867541	1.31e-10	5.32306	1.02e-07	#ERROR!
ABCA6	THAP9	0.190343	0.000209	0.847874	9.11e-10	5.3192	1.04e-07	#ERROR!
SAMHD1	THAP9	0.226596	9.37e-06	0.857405	3.69e-10	5.30417	1.13e-07	#ERROR!
PARP11	THAP9	0.463173	0	0.914123	2.72e-13	5.29331	1.2e-07	#ERROR!
FLRT2	THAP9	0.142629	0.005659	0.831745	3.68e-09	5.29057	1.22e-07	#ERROR!
DHODH	THAP9	0.51064	0	0.923387	5.22e-14	5.27938	1.3e-07	#ERROR!
NBN	THAP9	0.596578	0	0.939516	1.78e-15	5.27005	1.36e-07	#ERROR!
APCDD1	THAP9	0.207387	5.19e-05	0.849707	7.69e-10	5.26283	1.42e-07	#ERROR!
ADAM33	THAP9	0.123229	0.016965	0.823573	7.08e-09	5.25933	1.45e-07	#ERROR!
SULF1	THAP9	0.120222	0.019871	0.822581	7.65e-09	5.25921	1.45e-07	#ERROR!
SLFN5	THAP9	0.338686	1.62e-11	0.884531	1.88e-11	5.25754	1.46e-07	#ERROR!
INTS6L	THAP9	0.368518	1.66e-13	0.891496	7.76e-12	5.25176	1.51e-07	#ERROR!
NIT2	THAP9	0.539749	0	0.928152	2.04e-14	5.24483	1.56e-07	#ERROR!
ANTXR1	THAP9	0.149347	0.003747	0.831012	3.91e-09	5.24402	1.57e-07	#ERROR!
MDGA1	THAP9	0.0703	0.17431	0.804509	2.88e-08	5.24364	1.57e-07	0/+
MDM2	THAP9	0.437091	0	0.906525	9.19e-13	5.23454	1.65e-07	#ERROR!
GLI3	THAP9	0.12435	0.015981	0.822289	7.82e-09	5.23357	1.66e-07	#ERROR!
MCMDC2	THAP9	0.382211	1.73e-14	0.893777	5.73e-12	5.22802	1.71e-07	#ERROR!
CYP27C1	THAP9	0.030105	0.561128	0.788373	8.42e-08	5.22428	1.75e-07	0/+
SSBP2	THAP9	0.126259	0.01442	0.822214	7.87e-09	5.22263	1.76e-07	#ERROR!
PARP6	THAP9	0.306339	1.37e-09	0.874633	6.03e-11	5.21903	1.8e-07	#ERROR!
GAS6-DT	THAP9	0.162992	0.00154	0.833563	3.17e-09	5.21538	1.83e-07	#ERROR!
SLC35E4	THAP9	0.091968	0.075277	0.809751	1.99e-08	5.20952	1.89e-07	0/+
EFHC2	THAP9	0.188883	0.000234	0.841169	1.66e-09	5.20904	1.9e-07	#ERROR!
RNF217	THAP9	0.233522	4.87e-06	0.854106	5.08e-10	5.20524	1.94e-07	#ERROR!
NEDD1	THAP9	0.599539	0	0.938502	2.22e-15	5.20364	1.95e-07	#ERROR!
KCNJ5	THAP9	0.023987	0.643347	0.783645	1.13e-07	5.19279	2.07e-07	0/+
ACSL4	THAP9	0.468406	0	0.911657	4.08e-13	5.18507	2.16e-07	#ERROR!
HS3ST2	THAP9	-0.0448	0.386983	0.754928	5.96e-07	5.18469	2.16e-07	0/+
DNAJB14	THAP9	0.687824	0	0.953812	0	5.18192	2.2e-07	#ERROR!
LOC100507516	THAP9	0.091343	0.07729	0.807259	2.38e-08	5.17645	2.26e-07	0/+
PLA2G4A	THAP9	0.305794	1.47e-09	0.872434	7.71e-11	5.17529	2.28e-07	#ERROR!
NDN	THAP9	0.025593	0.621278	0.782258	1.24e-07	5.16664	2.38e-07	0/+
CALCRL	THAP9	0.274857	6.33e-08	0.863636	1.97e-10	5.16566	2.4e-07	#ERROR!
IPO11	THAP9	0.598486	0	0.937219	2.89e-15	5.15824	2.49e-07	#ERROR!
L3HYPDH	THAP9	0.524559	0	0.922626	6.02e-14	5.15769	2.5e-07	#ERROR!
GNB4	THAP9	0.221318	1.52e-05	0.847874	9.11e-10	5.15623	2.52e-07	#ERROR!
LINC00578	THAP9	0.116835	0.023654	0.814523	1.41e-08	5.15348	2.56e-07	#ERROR!
ARMCX1	THAP9	0.15417	0.002759	0.826581	5.59e-09	5.14786	2.63e-07	#ERROR!
GAS1RR	THAP9	0.021087	0.683986	0.778735	1.53e-07	5.14394	2.69e-07	0/+
LOC101929331	THAP9	0.039106	0.45022	0.785695	9.98e-08	5.14342	2.7e-07	0/+
COL8A1	THAP9	0.08503	0.100161	0.802053	3.41e-08	5.1341	2.83e-07	0/+
SORCS2	THAP9	0.149683	0.003669	0.824122	6.78e-09	5.13215	2.86e-07	#ERROR!
TRUB1	THAP9	0.629767	0	0.942449	8.88e-16	5.13097	2.88e-07	#ERROR!
KLHL9	THAP9	0.580852	0	0.932918	7.55e-15	5.12192	3.02e-07	#ERROR!
EPS15	THAP9	0.627069	0	0.941716	8.88e-16	5.1206	3.05e-07	#ERROR!
SNCAIP	THAP9	0.210883	3.85e-05	0.842636	1.46e-09	5.11896	3.07e-07	#ERROR!
ADGRL4	THAP9	0.289219	1.17e-08	0.865103	1.69e-10	5.11626	3.12e-07	#ERROR!
RNF180	THAP9	0.238192	3.09e-06	0.850412	7.2e-10	5.11233	3.18e-07	#ERROR!
HOXB2	THAP9	0.041511	0.422834	0.783724	1.13e-07	5.10545	3.3e-07	0/+
MIR99AHG	THAP9	0.055605	0.282813	0.788929	8.13e-08	5.10297	3.34e-07	0/+
SPESP1	THAP9	0.052511	0.310503	0.787351	8.99e-08	5.09762	3.44e-07	0/+
FRMD6-AS1	THAP9	0.240556	2.45e-06	0.848546	8.56e-10	5.06593	4.06e-07	#ERROR!
LOC100128398	THAP9	0.315473	4.13e-10	0.869135	1.1e-10	5.05256	4.36e-07	#ERROR!
RAB31	THAP9	0.136283	0.008226	0.814407	1.42e-08	5.05218	4.37e-07	#ERROR!
DTNA	THAP9	0.18383	0.000346	0.829912	4.28e-09	5.04747	4.48e-07	#ERROR!
GPR27	THAP9	0.045691	0.377608	0.780568	1.37e-07	5.0434	4.57e-07	0/+
PHLDB2	THAP9	0.214024	2.92e-05	0.838787	2.04e-09	5.03625	4.75e-07	#ERROR!
STAC	THAP9	0.02612	0.614118	0.772023	2.28e-07	5.03378	4.81e-07	0/+
ERG	THAP9	0.189491	0.000224	0.830721	4.01e-09	5.03105	4.88e-07	#ERROR!
THUMPD3	THAP9	0.632199	0	0.940422	1.33e-15	5.02079	5.15e-07	#ERROR!
NAA16	THAP9	0.624338	0	0.938783	2e-15	5.01575	5.28e-07	#ERROR!
OSMR	THAP9	0.234536	4.42e-06	0.843842	1.31e-09	5.0146	5.31e-07	#ERROR!
DIPK2B	THAP9	0.187	0.000271	0.828812	4.68e-09	5.01318	5.35e-07	#ERROR!
SERTAD4	THAP9	0.239671	2.68e-06	0.845308	1.15e-09	5.01295	5.36e-07	#ERROR!
PGM5-AS1	THAP9	-0.00891	0.863394	0.755201	5.88e-07	5.00695	5.53e-07	0/+
GALNT15	THAP9	0.070402	0.173683	0.786984	9.2e-08	5.00229	5.67e-07	0/+
SYT3	THAP9	0.105507	0.041151	0.800074	3.91e-08	5.00217	5.67e-07	#ERROR!
TDRD10	THAP9	0.113552	0.027899	0.802933	3.21e-08	5.00143	5.69e-07	#ERROR!
CNTNAP3B	THAP9	0.187831	0.000254	0.828307	4.87e-09	5.00073	5.71e-07	#ERROR!
IL6ST	THAP9	0.420385	0	0.893695	5.8e-12	4.99668	5.83e-07	#ERROR!
BGN	THAP9	-0.000693	0.989333	0.757698	5.13e-07	4.99493	5.89e-07	0/+
PTPRS	THAP9	0.181379	0.000416	0.825513	6.08e-09	4.98987	6.04e-07	#ERROR!
SRPX	THAP9	0.053174	0.30442	0.779326	1.48e-07	4.98962	6.05e-07	0/+
CARF	THAP9	0.575583	0	0.928238	2.02e-14	4.9858	6.17e-07	#ERROR!
CHST9	THAP9	0.125848	0.014744	0.806123	2.57e-08	4.98414	6.22e-07	#ERROR!
PDE1C	THAP9	0.260186	3.22e-07	0.849707	7.69e-10	4.98137	6.31e-07	#ERROR!
TLE4	THAP9	0.328972	6.49e-11	0.869135	1.1e-10	4.97668	6.47e-07	#ERROR!
KBTBD6	THAP9	0.59081	0	0.931085	1.11e-14	4.97525	6.52e-07	#ERROR!
INTS2	THAP9	0.648215	0	0.942449	8.88e-16	4.97387	6.56e-07	#ERROR!
FGF14-AS2	THAP9	0.076533	0.139064	0.78669	9.37e-08	4.96734	6.79e-07	0/+
PABPC4L	THAP9	0.237494	3.31e-06	0.84198	1.55e-09	4.96642	6.82e-07	#ERROR!
PRKAR2B	THAP9	0.156596	0.002357	0.815616	1.3e-08	4.96573	6.84e-07	#ERROR!
CAVIN2	THAP9	0.191805	0.000186	0.827346	5.26e-09	4.96457	6.89e-07	#ERROR!
SLITRK3	THAP9	-0.02606	0.614881	0.743994	1.06e-06	4.96448	6.89e-07	0/+
TRO	THAP9	0.29459	6.06e-09	0.858766	3.23e-10	4.96249	6.96e-07	#ERROR!
COL14A1	THAP9	0.143406	0.0054	0.810741	1.85e-08	4.96121	7.01e-07	#ERROR!
KCTD15	THAP9	0.179913	0.000464	0.822947	7.44e-09	4.95719	7.15e-07	#ERROR!
THBS2	THAP9	0.069705	0.177991	0.782991	1.18e-07	4.9534	7.29e-07	0/+
DDIT4L	THAP9	0.117842	0.02247	0.801065	3.65e-08	4.95315	7.3e-07	#ERROR!
SCN7A	THAP9	0.051748	0.317591	0.77566	1.84e-07	4.95013	7.42e-07	0/+
TENT2	THAP9	0.534403	0	0.918255	1.33e-13	4.94463	7.63e-07	#ERROR!
RGMA	THAP9	0.017187	0.740084	0.760997	4.28e-07	4.9441	7.65e-07	0/+
TM6SF1	THAP9	0.119172	0.020984	0.79978	3.98e-08	4.92833	8.29e-07	#ERROR!
MCPH1	THAP9	0.620673	0	0.93585	4e-15	4.92421	8.47e-07	#ERROR!
PABPC5	THAP9	0.164801	0.001362	0.815582	1.3e-08	4.92279	8.53e-07	#ERROR!
LINC00665	THAP9	0.157936	0.002159	0.812683	1.61e-08	4.91499	8.88e-07	#ERROR!
KIAA0825	THAP9	0.460874	0	0.900293	2.32e-12	4.91364	8.94e-07	#ERROR!
SPOCK1	THAP9	0.032106	0.535378	0.764663	3.49e-07	4.91307	8.97e-07	0/+
MR1	THAP9	0.279012	3.92e-08	0.85154	6.48e-10	4.91249	8.99e-07	#ERROR!
PTHLH	THAP9	0.010121	0.845124	0.755132	5.9e-07	4.91024	9.1e-07	0/+
PAPOLG	THAP9	0.701413	0	0.951246	0	4.91011	9.1e-07	#ERROR!
PLEKHH2	THAP9	0.368734	1.6e-13	0.87673	4.75e-11	4.90937	9.14e-07	#ERROR!
ARHGAP31	THAP9	0.177395	0.000558	0.81899	1.01e-08	4.90914	9.15e-07	#ERROR!
SSPN	THAP9	0.129453	0.012106	0.801686	3.5e-08	4.90249	9.46e-07	#ERROR!
SENP1	THAP9	0.616145	0	0.934384	5.55e-15	4.90232	9.47e-07	#ERROR!
MBLAC2	THAP9	0.555664	0	0.921554	7.35e-14	4.90034	9.57e-07	#ERROR!
TMEM255B	THAP9	0.176861	0.00058	0.818182	1.07e-08	4.89957	9.6e-07	#ERROR!
MAGI2-AS3	THAP9	0.197583	0.000117	0.825147	6.26e-09	4.8994	9.61e-07	#ERROR!
PSTPIP2	THAP9	0.33356	3.39e-11	0.866569	1.45e-10	4.89834	9.67e-07	#ERROR!
MTERF3	THAP9	0.494129	0	0.907525	7.88e-13	4.89579	9.79e-07	#ERROR!
TSHZ2	THAP9	0.26268	2.46e-07	0.845674	1.11e-09	4.8957	9.8e-07	#ERROR!
FRMD4A	THAP9	0.273082	7.74e-08	0.848685	8.45e-10	4.89297	9.93e-07	#ERROR!
FIBIN	THAP9	0.062147	0.229901	0.775293	1.88e-07	4.89294	9.93e-07	0/+
SOD2	THAP9	0.338795	1.59e-11	0.867669	1.29e-10	4.89094	1e-06	#ERROR!
IKZF5	THAP9	0.691856	0	0.949047	0	4.88968	1.01e-06	#ERROR!
ELK4	THAP9	0.537556	0	0.917155	1.62e-13	4.88724	1.02e-06	#ERROR!
CACNA2D1	THAP9	0.288795	1.23e-08	0.853006	5.64e-10	4.88588	1.03e-06	#ERROR!
BEX4	THAP9	0.085365	0.098824	0.783796	1.12e-07	4.88453	1.04e-06	0/+
FBXO17	THAP9	0.11358	0.02786	0.794355	5.72e-08	4.88194	1.05e-06	#ERROR!
EVC2	THAP9	0.14256	0.005682	0.80495	2.79e-08	4.88156	1.05e-06	#ERROR!
FER1L5	THAP9	0.250115	9.32e-07	0.840899	1.7e-09	4.88016	1.06e-06	#ERROR!
TMEM200B	THAP9	0.068161	0.187822	0.776393	1.76e-07	4.87643	1.08e-06	0/+
A4GALT	THAP9	0.06304	0.223262	0.774194	2.01e-07	4.87456	1.09e-06	0/+
DLG2	THAP9	0.203885	6.98e-05	0.825513	6.08e-09	4.87211	1.1e-06	#ERROR!
RASL12	THAP9	0.132172	0.010401	0.799853	3.96e-08	4.86282	1.16e-06	#ERROR!
RGS7BP	THAP9	0.275605	5.81e-08	0.847402	9.51e-10	4.85621	1.2e-06	#ERROR!
PDPN	THAP9	0.068107	0.188169	0.77456	1.97e-07	4.85354	1.21e-06	0/+
IL3RA	THAP9	0.127006	0.013846	0.797177	4.75e-08	4.85208	1.22e-06	#ERROR!
ANKRD29	THAP9	0.06476	0.210865	0.772981	2.16e-07	4.85066	1.23e-06	0/+
EPM2AIP1	THAP9	0.406074	2.22e-16	0.883798	2.06e-11	4.84619	1.26e-06	#ERROR!
SETD6	THAP9	0.514497	0	0.910557	4.88e-13	4.84615	1.26e-06	#ERROR!
EDA2R	THAP9	0.16526	0.00132	0.810375	1.9e-08	4.84304	1.28e-06	#ERROR!
NOL8	THAP9	0.642155	0	0.938136	2.22e-15	4.83854	1.31e-06	#ERROR!
ROR1	THAP9	0.201626	8.43e-05	0.822581	7.65e-09	4.83795	1.31e-06	#ERROR!
CD109	THAP9	0.173866	0.000721	0.81305	1.57e-08	4.83791	1.31e-06	#ERROR!
LIMS1-AS1	THAP9	0.466859	0	0.898872	2.84e-12	4.83768	1.31e-06	#ERROR!
MIR186	THAP9	0.416178	0	0.88604	1.56e-11	4.83701	1.32e-06	#ERROR!
MYO5A	THAP9	0.348867	3.58e-12	0.867669	1.29e-10	4.83339	1.34e-06	#ERROR!
DHX36	THAP9	0.677137	0	0.945015	4.44e-16	4.83216	1.35e-06	#ERROR!
EIF1AX	THAP9	0.539456	0	0.915689	2.08e-13	4.82764	1.38e-06	#ERROR!
TMOD1	THAP9	0.112234	0.02978	0.789734	7.72e-08	4.82634	1.39e-06	#ERROR!
ADGRD1	THAP9	0.205171	6.27e-05	0.823023	7.39e-09	4.82621	1.39e-06	#ERROR!
MID2	THAP9	0.19915	0.000103	0.820748	8.81e-09	4.82252	1.42e-06	#ERROR!
MAGEE1	THAP9	0.154144	0.002763	0.804985	2.79e-08	4.8224	1.42e-06	#ERROR!
NHS	THAP9	0.334297	3.05e-11	0.862903	2.13e-10	4.82094	1.43e-06	#ERROR!
DEGS1	THAP9	0.305921	1.45e-09	0.854472	4.91e-10	4.81848	1.45e-06	#ERROR!
BOC	THAP9	0.045816	0.376304	0.762463	3.94e-07	4.81732	1.46e-06	0/+
SCN3B	THAP9	0.263317	2.3e-07	0.841276	1.64e-09	4.81545	1.47e-06	#ERROR!
CPEB1	THAP9	0.025397	0.623958	0.753551	6.42e-07	4.81478	1.47e-06	0/+
LEPR	THAP9	0.334233	3.08e-11	0.862537	2.21e-10	4.81408	1.48e-06	#ERROR!
CHL1	THAP9	0.125569	0.014968	0.793767	5.95e-08	4.81265	1.49e-06	#ERROR!
NEXMIF	THAP9	0.090891	0.078772	0.780345	1.39e-07	4.8117	1.5e-06	0/+
SMARCA2	THAP9	0.385362	1.02e-14	0.876466	4.9e-11	4.80598	1.54e-06	#ERROR!
AASDHPPT	THAP9	0.672978	0	0.943548	6.66e-16	4.80246	1.57e-06	#ERROR!
TMEM47	THAP9	0.15419	0.002755	0.803519	3.08e-08	4.80125	1.58e-06	#ERROR!
DSEL	THAP9	0.194233	0.000154	0.817674	1.11e-08	4.8012	1.58e-06	#ERROR!
DOC2B	THAP9	0.071517	0.166952	0.771628	2.34e-07	4.79956	1.59e-06	0/+
CAV2	THAP9	0.122649	0.017495	0.791422	6.93e-08	4.79582	1.62e-06	#ERROR!
CNIH3	THAP9	0.098056	0.057818	0.781852	1.27e-07	4.79475	1.63e-06	0/+
DISC1	THAP9	0.414678	0	0.883798	2.06e-11	4.79406	1.63e-06	#ERROR!
ADAM23	THAP9	0.220619	1.62e-05	0.826031	5.84e-09	4.79203	1.65e-06	#ERROR!
BEND6	THAP9	0.11915	0.021007	0.789551	7.81e-08	4.78858	1.68e-06	#ERROR!
EEF1AKMT2	THAP9	0.559028	0	0.918889	1.19e-13	4.7881	1.68e-06	#ERROR!
TRMT5	THAP9	0.606017	0	0.929252	1.64e-14	4.78737	1.69e-06	#ERROR!
DDX25	THAP9	0.136916	0.00793	0.79611	5.1e-08	4.78655	1.7e-06	#ERROR!
AQP1	THAP9	0.026178	0.613327	0.7511	7.31e-07	4.78238	1.73e-06	0/+
QKI	THAP9	0.28253	2.6e-08	0.845308	1.15e-09	4.78119	1.74e-06	#ERROR!
CDH19	THAP9	0.058314	0.259983	0.764366	3.55e-07	4.77716	1.78e-06	0/+
SCN2B	THAP9	0.047094	0.363124	0.7596	4.62e-07	4.77659	1.78e-06	0/+
ATR	THAP9	0.634396	0	0.934751	5.11e-15	4.76591	1.88e-06	#ERROR!
STUM	THAP9	0.101076	0.050488	0.780792	1.35e-07	4.76567	1.88e-06	0/+
RIMKLB	THAP9	0.269086	1.21e-07	0.840176	1.81e-09	4.76527	1.89e-06	#ERROR!
IMPACT	THAP9	0.508136	0	0.906158	9.73e-13	4.76281	1.91e-06	#ERROR!
PPP1R3C	THAP9	0.085384	0.098751	0.774265	2e-07	4.76226	1.91e-06	0/+
HDX	THAP9	0.245904	1.43e-06	0.832478	3.47e-09	4.76131	1.92e-06	#ERROR!
CILP	THAP9	0.00325	0.949988	0.739003	1.36e-06	4.76092	1.93e-06	0/+
SIKE1	THAP9	0.733214	0	0.954545	0	4.76056	1.93e-06	#ERROR!
KLF7	THAP9	0.282906	2.48e-08	0.844208	1.27e-09	4.75978	1.94e-06	#ERROR!
PKIA	THAP9	0.180637	0.000439	0.810117	1.94e-08	4.75941	1.94e-06	#ERROR!
CPNE2	THAP9	0.267341	1.47e-07	0.839076	1.99e-09	4.75596	1.98e-06	#ERROR!
CNTLN	THAP9	0.316199	3.75e-10	0.854106	5.08e-10	4.75432	1.99e-06	#ERROR!
MAFB	THAP9	0.036946	0.47565	0.753299	6.51e-07	4.75359	2e-06	0/+
ATP2C1	THAP9	0.493125	0	0.902126	1.78e-12	4.75242	2.01e-06	#ERROR!
MID1	THAP9	0.456999	0	0.893044	6.32e-12	4.75195	2.01e-06	#ERROR!
GULP1	THAP9	0.323492	1.39e-10	0.855938	4.26e-10	4.74772	2.06e-06	#ERROR!
KLHL38	THAP9	0.104125	0.043891	0.7806	1.37e-07	4.74767	2.06e-06	#ERROR!
MCMBP	THAP9	0.544349	0	0.914223	2.67e-13	4.74738	2.06e-06	#ERROR!
INPP5E	THAP9	0.506562	0	0.905059	1.15e-12	4.74268	2.11e-06	#ERROR!
LYST	THAP9	0.458072	0	0.89286	6.48e-12	4.74056	2.13e-06	#ERROR!
OXCT1	THAP9	0.356978	1.03e-12	0.865365	1.65e-10	4.74014	2.14e-06	#ERROR!
TPST1	THAP9	0.30071	2.82e-09	0.848607	8.51e-10	4.73988	2.14e-06	#ERROR!
CYLD	THAP9	0.414795	0	0.881232	2.81e-11	4.7349	2.19e-06	#ERROR!
FGD6	THAP9	0.30912	9.56e-10	0.850806	6.94e-10	4.73303	2.21e-06	#ERROR!
PLAGL1	THAP9	0.367624	1.92e-13	0.868035	1.24e-10	4.73246	2.22e-06	#ERROR!
ANKRD6	THAP9	0.285554	1.81e-08	0.843446	1.36e-09	4.73194	2.22e-06	#ERROR!
PMS2P3	THAP9	0.499566	0	0.902889	1.59e-12	4.73008	2.24e-06	#ERROR!
RNF207	THAP9	0.496622	0	0.902126	1.78e-12	4.72909	2.26e-06	#ERROR!
FAM122A	THAP9	0.507066	0	0.904692	1.22e-12	4.72907	2.26e-06	#ERROR!
EHD2	THAP9	0.063384	0.220742	0.762463	3.94e-07	4.72855	2.26e-06	0/+
SEC22A	THAP9	0.612927	0	0.929154	1.69e-14	4.72837	2.26e-06	#ERROR!
CLEC1A	THAP9	0.124057	0.016234	0.786546	9.46e-08	4.72354	2.32e-06	#ERROR!
ABCA1	THAP9	0.340154	1.31e-11	0.859604	2.97e-10	4.72328	2.32e-06	#ERROR!
H3-2	THAP9	0.03316	0.522066	0.748808	8.25e-07	4.72079	2.35e-06	0/+
FBXL5	THAP9	0.464666	0	0.893695	5.8e-12	4.71916	2.37e-06	#ERROR!
STEAP2	THAP9	0.240607	2.44e-06	0.828079	4.96e-09	4.71833	2.38e-06	#ERROR!
SLC43A3	THAP9	0.220297	1.67e-05	0.821114	8.56e-09	4.71674	2.4e-06	#ERROR!
IL17B	THAP9	0.012785	0.805087	0.739226	1.35e-06	4.71535	2.41e-06	0/+
ANKRD50	THAP9	0.501691	0	0.902859	1.6e-12	4.71499	2.42e-06	#ERROR!
PCDH7	THAP9	0.003136	0.951734	0.734671	1.69e-06	4.71375	2.43e-06	0/+
GPIHBP1	THAP9	0.034098	0.510346	0.748488	8.39e-07	4.71238	2.45e-06	0/+
SCN4B	THAP9	0.154465	0.002707	0.797177	4.75e-08	4.71094	2.47e-06	#ERROR!
GFPT2	THAP9	0.02636	0.610858	0.744868	1.01e-06	4.71019	2.47e-06	0/+
SYCP2L	THAP9	0.27602	5.54e-08	0.839148	1.98e-09	4.70998	2.48e-06	#ERROR!
LURAP1	THAP9	0.195796	0.000136	0.812065	1.68e-08	4.7089	2.49e-06	#ERROR!
RAB17	THAP9	0.430101	0	-0.44172	0.011374	-4.70727	2.51e-06	#ERROR!
ANKRD33B	THAP9	0.145796	0.004669	0.793622	6e-08	4.70686	2.52e-06	#ERROR!
FHOD3	THAP9	0.194105	0.000155	0.811217	1.79e-08	4.70524	2.54e-06	#ERROR!
PLXDC2	THAP9	0.150336	0.003521	0.795088	5.45e-08	4.70349	2.56e-06	#ERROR!
CHIC1	THAP9	0.328049	7.39e-11	0.854839	4.74e-10	4.70139	2.58e-06	#ERROR!
MYOF	THAP9	0.206342	5.68e-05	0.815249	1.33e-08	4.70101	2.59e-06	#ERROR!
ELFN1	THAP9	0.144234	0.005136	0.792595	6.42e-08	4.70095	2.59e-06	#ERROR!
IFI16	THAP9	0.169738	0.000967	0.802053	3.41e-08	4.70003	2.6e-06	#ERROR!
PRKD1	THAP9	0.193023	0.000169	0.810449	1.89e-08	4.69961	2.61e-06	#ERROR!
CHML	THAP9	0.66643	0	0.939883	1.55e-15	4.69905	2.61e-06	#ERROR!
GREM2	THAP9	0.035922	0.487982	0.748052	8.58e-07	4.6982	2.62e-06	0/+
TRAM1L1	THAP9	0.139198	0.00694	0.790318	7.44e-08	4.69614	2.65e-06	#ERROR!
ABLIM3	THAP9	0.07781	0.132572	0.765762	3.28e-07	4.69545	2.66e-06	0/+
COL12A1	THAP9	0.200217	9.47e-05	0.812683	1.61e-08	4.69489	2.67e-06	#ERROR!
MRI1	THAP9	0.32474	1.17e-10	0.853451	5.41e-10	4.69419	2.68e-06	#ERROR!
LOC101928489	THAP9	0.140452	0.006444	0.790625	7.29e-08	4.69382	2.68e-06	#ERROR!
EPCAM	THAP9	0.399693	8.88e-16	-0.46848	0.006845	-4.69225	2.7e-06	#ERROR!
F8	THAP9	0.2664	1.64e-07	0.834937	2.83e-09	4.69142	2.71e-06	#ERROR!
CNTNAP3	THAP9	0.206281	5.71e-05	0.814482	1.41e-08	4.68983	2.73e-06	#ERROR!
BMERB1	THAP9	0.075537	0.144298	0.764296	3.56e-07	4.68915	2.74e-06	0/+
NUP107	THAP9	0.60022	0	0.92522	3.69e-14	4.68838	2.75e-06	#ERROR!
LINC01798	THAP9	0.105636	0.040901	0.776484	1.75e-07	4.68733	2.77e-06	#ERROR!
KCNJ2-AS1	THAP9	0.319434	2.42e-10	0.851146	6.73e-10	4.68157	2.85e-06	#ERROR!
LINC00839	THAP9	0.212693	3.29e-05	0.816173	1.24e-08	4.68145	2.85e-06	#ERROR!
LINC00921	THAP9	0.332742	3.81e-11	0.855179	4.58e-10	4.68122	2.85e-06	#ERROR!
SETBP1	THAP9	0.190724	0.000203	0.808284	2.21e-08	4.68003	2.87e-06	#ERROR!
LINC01354	THAP9	0.045232	0.382426	0.750298	7.63e-07	4.67701	2.91e-06	0/+
ARHGAP10	THAP9	0.173239	0.000754	0.801686	3.5e-08	4.67669	2.92e-06	#ERROR!
ID4	THAP9	0.050513	0.329289	0.752566	6.77e-07	4.67659	2.92e-06	0/+
CDH13	THAP9	0.311658	6.85e-10	0.84824	8.81e-10	4.67243	2.98e-06	#ERROR!
RADIL	THAP9	0.064429	0.213209	0.758159	5e-07	4.67187	2.98e-06	0/+
SOX3	THAP9	0.007734	0.881337	0.732897	1.84e-06	4.67122	2.99e-06	0/+
PDLIM4	THAP9	-0.02818	0.586456	0.715543	4.16e-06	4.66826	3.04e-06	0/+
GAS7	THAP9	0.141655	0.005999	0.788856	8.17e-08	4.66395	3.1e-06	#ERROR!
TNC	THAP9	0.104042	0.044061	0.773827	2.05e-07	4.66191	3.13e-06	#ERROR!
ADD2	THAP9	0.113455	0.028034	0.777564	1.64e-07	4.66119	3.14e-06	#ERROR!
NIN	THAP9	0.37743	3.84e-14	0.867302	1.34e-10	4.66015	3.16e-06	#ERROR!
SCARA3	THAP9	0.162765	0.001564	0.796554	4.95e-08	4.65945	3.17e-06	#ERROR!
RRM2B	THAP9	0.537017	0	0.909457	5.82e-13	4.65711	3.21e-06	#ERROR!
FRMD6	THAP9	0.170206	0.000936	0.799083	4.18e-08	4.65595	3.22e-06	#ERROR!
CLHC1	THAP9	0.561157	0	0.915208	2.26e-13	4.65582	3.23e-06	#ERROR!
MPP7	THAP9	0.332685	3.84e-11	0.853739	5.26e-10	4.65467	3.25e-06	#ERROR!
GABPA	THAP9	0.689625	0	0.943635	4.44e-16	4.6499	3.32e-06	#ERROR!
ARL2BP	THAP9	0.19548	0.000139	0.807918	2.27e-08	4.64982	3.32e-06	#ERROR!
LOC339803	THAP9	0.101244	0.050104	0.771698	2.33e-07	4.64954	3.33e-06	0/+
GHR	THAP9	0.167076	0.001164	0.797287	4.71e-08	4.64724	3.36e-06	#ERROR!
SFRP2	THAP9	-0.07887	0.127348	0.687317	1.39e-05	4.64434	3.41e-06	0/+
THSD7A	THAP9	0.223681	1.23e-05	0.817524	1.12e-08	4.64378	3.42e-06	#ERROR!
CPT1C	THAP9	0.20598	5.85e-05	0.811257	1.78e-08	4.64351	3.43e-06	#ERROR!
MFAP5	THAP9	-0.00328	0.949557	0.725073	2.68e-06	4.64257	3.44e-06	0/+
RFESD	THAP9	0.410406	0	0.875688	5.35e-11	4.63919	3.5e-06	#ERROR!
TMEM45A	THAP9	0.171757	0.000838	0.798387	4.38e-08	4.63821	3.51e-06	#ERROR!
BHMT2	THAP9	0.11861	0.021601	0.777747	1.63e-07	4.6372	3.53e-06	#ERROR!
AOX1	THAP9	0.168442	0.001059	0.796994	4.8e-08	4.6361	3.55e-06	#ERROR!
SPART	THAP9	0.261466	2.81e-07	0.829912	4.28e-09	4.63569	3.56e-06	#ERROR!
FAM43B	THAP9	0.017142	0.740741	0.733773	1.77e-06	4.63336	3.6e-06	0/+
PGM5	THAP9	0.042186	0.415319	0.744868	1.01e-06	4.63037	3.65e-06	0/+
MAMLD1	THAP9	0.267968	1.38e-07	0.831745	3.68e-09	4.63028	3.65e-06	#ERROR!
PIK3IP1	THAP9	0.219844	1.74e-05	0.815249	1.33e-08	4.62975	3.66e-06	#ERROR!
NUFIP1	THAP9	0.502255	0	0.899826	2.48e-12	4.62971	3.66e-06	#ERROR!
PRIMA1	THAP9	0.016455	0.750781	0.733022	1.83e-06	4.62863	3.68e-06	0/+
LINC00670	THAP9	0.156492	0.002373	0.791826	6.75e-08	4.62736	3.7e-06	#ERROR!
HNF4A	THAP9	0.388221	6.22e-15	-0.46888	0.00679	-4.62648	3.72e-06	#ERROR!
H2BC21	THAP9	0.233434	4.91e-06	0.819648	9.58e-09	4.62437	3.76e-06	#ERROR!
BHLHE22	THAP9	0.010383	0.841161	0.72974	2.15e-06	4.62367	3.77e-06	0/+
RCBTB2	THAP9	0.340614	1.22e-11	0.854472	4.91e-10	4.62327	3.78e-06	#ERROR!
HDGFL3	THAP9	0.248445	1.11e-06	0.824672	6.5e-09	4.6222	3.8e-06	#ERROR!
MFSD14C	THAP9	0.418822	0	0.877199	4.5e-11	4.62084	3.82e-06	#ERROR!
ANKS1B	THAP9	0.129708	0.011936	0.780895	1.34e-07	4.6208	3.82e-06	#ERROR!
MAK16	THAP9	0.542125	0	0.909457	5.82e-13	4.6208	3.82e-06	#ERROR!
FAM43A	THAP9	0.159834	0.001904	0.792522	6.45e-08	4.61951	3.85e-06	#ERROR!
SPAG16	THAP9	0.259965	3.3e-07	0.828338	4.86e-09	4.61844	3.87e-06	#ERROR!
RASSF8	THAP9	0.238781	2.92e-06	0.821114	8.56e-09	4.61844	3.87e-06	#ERROR!
FRMD6-AS2	THAP9	0.029685	0.566604	0.737982	1.43e-06	4.61638	3.9e-06	0/+
SKA2	THAP9	0.432803	0	0.880865	2.93e-11	4.61605	3.91e-06	#ERROR!
PLSCR4	THAP9	0.24807	1.15e-06	0.824047	6.82e-09	4.61438	3.94e-06	#ERROR!
LARS1	THAP9	0.621095	0	0.927786	2.22e-14	4.61195	3.99e-06	#ERROR!
TIGD1	THAP9	0.559906	0	0.913474	3.03e-13	4.61175	3.99e-06	#ERROR!
CHRDL1	THAP9	0.046276	0.37153	0.744936	1.01e-06	4.6105	4.02e-06	0/+
DLEU2	THAP9	0.450354	0	0.885384	1.69e-11	4.60967	4.03e-06	#ERROR!
DPYD	THAP9	0.160342	0.001841	0.791789	6.76e-08	4.60697	4.09e-06	#ERROR!
DIPK2A	THAP9	0.459911	0	0.88783	1.25e-11	4.60654	4.09e-06	#ERROR!
MICU3	THAP9	0.203146	7.43e-05	0.807699	2.3e-08	4.60643	4.1e-06	#ERROR!
GOT2	THAP9	0.370759	1.15e-13	0.862537	2.21e-10	4.60392	4.15e-06	#ERROR!
ERCC8	THAP9	0.637971	0	0.931354	1.07e-14	4.60338	4.16e-06	#ERROR!
NTN1	THAP9	0.059561	0.249914	0.75	7.75e-07	4.60119	4.2e-06	0/+
RIPK2	THAP9	0.325786	1.01e-10	0.848607	8.51e-10	4.5998	4.23e-06	#ERROR!
TRIM6	THAP9	0.221846	1.45e-05	0.813858	1.48e-08	4.59831	4.26e-06	#ERROR!
FAM171B	THAP9	0.372972	8.04e-14	0.862903	2.13e-10	4.5982	4.26e-06	#ERROR!
CREB1	THAP9	0.701693	0	0.945015	4.44e-16	4.59629	4.3e-06	#ERROR!
CDC40	THAP9	0.67592	0	0.939516	1.78e-15	4.59626	4.3e-06	#ERROR!
PKNOX2	THAP9	0.056894	0.271787	0.748167	8.53e-07	4.59363	4.36e-06	0/+
FGF14	THAP9	0.130731	0.011276	0.779102	1.5e-07	4.59249	4.38e-06	#ERROR!
TPO	THAP9	0.193314	0.000165	0.80308	3.18e-08	4.59175	4.4e-06	#ERROR!
LOC101927392	THAP9	-0.06377	0.21793	0.689697	1.26e-05	4.59066	4.42e-06	0/+
NPR3	THAP9	0.082231	0.111887	0.758798	4.83e-07	4.58927	4.45e-06	0/+
TNFAIP8L3	THAP9	0.096366	0.062289	0.764663	3.49e-07	4.58788	4.48e-06	0/+
SLC35E3	THAP9	0.542678	0	0.908358	6.92e-13	4.585	4.54e-06	#ERROR!
NTM	THAP9	0.035033	0.498819	0.737537	1.47e-06	4.58449	4.55e-06	0/+
FAM114A2	THAP9	0.510823	0	0.900293	2.32e-12	4.58406	4.56e-06	#ERROR!
GAL3ST4	THAP9	0.044899	0.385944	0.74182	1.18e-06	4.58236	4.6e-06	0/+
MRPS27	THAP9	0.478851	0	0.891862	7.4e-12	4.58174	4.61e-06	#ERROR!
SH3BP5	THAP9	0.119907	0.020199	0.773827	2.05e-07	4.58097	4.63e-06	#ERROR!
PRRT1	THAP9	0.241255	2.29e-06	0.81954	9.66e-09	4.58096	4.63e-06	#ERROR!
GNA14	THAP9	0.234203	4.56e-06	0.816974	1.17e-08	4.57949	4.66e-06	#ERROR!
LINC00662	THAP9	0.398639	8.88e-16	0.869501	1.06e-10	4.57942	4.66e-06	#ERROR!
MGAT4C	THAP9	0.132235	0.010364	0.778635	1.54e-07	4.57881	4.68e-06	#ERROR!
CTF2P	THAP9	0.054951	0.288523	0.745958	9.57e-07	4.57827	4.69e-06	0/+
NUDCD1	THAP9	0.52917	0	0.904692	1.22e-12	4.57684	4.72e-06	#ERROR!
AGK	THAP9	0.625396	0	0.927786	2.22e-14	4.57653	4.73e-06	#ERROR!
KTN1-AS1	THAP9	0.330764	5.04e-11	0.848868	8.31e-10	4.57639	4.73e-06	#ERROR!
MSTN	THAP9	0.263523	2.24e-07	0.826789	5.5e-09	4.57444	4.78e-06	#ERROR!
GSPT2	THAP9	0.154606	0.002682	0.787023	9.18e-08	4.57289	4.81e-06	#ERROR!
CEBPZ	THAP9	0.650279	0	0.933284	7.11e-15	4.57178	4.84e-06	#ERROR!
NRTN	THAP9	0.187655	0.000258	0.799487	4.06e-08	4.57076	4.86e-06	#ERROR!
ADGRA2	THAP9	0.160806	0.001784	0.789223	7.98e-08	4.57011	4.87e-06	#ERROR!
BACE1	THAP9	0.391465	3.55e-15	0.866935	1.4e-10	4.56974	4.88e-06	#ERROR!
NUP155	THAP9	0.611923	0	0.924487	4.22e-14	4.56966	4.89e-06	#ERROR!
S100A3	THAP9	-0.02888	0.577149	0.705246	6.57e-06	4.56707	4.95e-06	0/+
PITRM1	THAP9	0.412213	0	0.872801	7.4e-11	4.56652	4.96e-06	#ERROR!
MEIS3	THAP9	0.094378	0.06791	0.761983	4.05e-07	4.56564	4.98e-06	0/+
SLC9A9	THAP9	0.119501	0.02063	0.772361	2.24e-07	4.56469	5e-06	#ERROR!
KANSL1L	THAP9	0.609481	0	0.923754	4.88e-14	4.56398	5.02e-06	#ERROR!
MAMDC2	THAP9	0.10786	0.036813	0.767482	2.97e-07	4.56374	5.02e-06	#ERROR!
LIMCH1	THAP9	0.338174	1.74e-11	0.85044	7.18e-10	4.56284	5.05e-06	#ERROR!
C1orf35	THAP9	0.308428	1.05e-09	0.840957	1.69e-09	4.56241	5.06e-06	#ERROR!
TMEM17	THAP9	0.365996	2.49e-13	0.858871	3.19e-10	4.56043	5.1e-06	#ERROR!
POT1	THAP9	0.593185	0	0.919806	1.01e-13	4.56025	5.11e-06	#ERROR!
GNAI1	THAP9	0.239325	2.77e-06	0.817449	1.13e-08	4.55936	5.13e-06	#ERROR!
LRP12	THAP9	0.367836	1.85e-13	0.859316	3.05e-10	4.55828	5.16e-06	#ERROR!
SMTNL2	THAP9	0.138444	0.007254	0.779459	1.47e-07	4.5575	5.18e-06	#ERROR!
C8orf88	THAP9	0.071924	0.164544	0.751604	7.12e-07	4.55716	5.19e-06	0/+
TPP2	THAP9	0.661825	0	0.935484	4.44e-15	4.55696	5.19e-06	#ERROR!
SHANK3	THAP9	0.311671	6.84e-10	0.841642	1.59e-09	4.55615	5.21e-06	#ERROR!
FMO2	THAP9	-0.01034	0.841827	0.713343	4.59e-06	4.55572	5.22e-06	0/+
FAM107A	THAP9	0.052229	0.313111	0.742669	1.13e-06	4.55486	5.24e-06	0/+
BNIP3P30	THAP9	0.137676	0.007587	0.778784	1.53e-07	4.55279	5.29e-06	#ERROR!
NTRK2	THAP9	0.157309	0.00225	0.786546	9.46e-08	4.55262	5.3e-06	#ERROR!
LINC01140	THAP9	0.175031	0.000663	0.79329	6.14e-08	4.55116	5.34e-06	#ERROR!
CADM2	THAP9	0.111653	0.030642	0.768032	2.88e-07	4.55115	5.34e-06	#ERROR!
PCDHGC3	THAP9	0.163533	0.001485	0.788856	8.17e-08	4.5511	5.34e-06	#ERROR!
PRDM5	THAP9	0.286967	1.53e-08	0.833211	3.27e-09	4.55064	5.35e-06	#ERROR!
ANGPT2	THAP9	0.378715	3.11e-14	0.86217	2.29e-10	4.55009	5.36e-06	#ERROR!
TIMP2	THAP9	0.123326	0.016878	0.772727	2.19e-07	4.54971	5.37e-06	#ERROR!
SOX1-OT	THAP9	0.071526	0.166899	0.750736	7.46e-07	4.54914	5.39e-06	0/+
LINC01003	THAP9	0.406504	2.22e-16	0.870235	9.81e-11	4.54732	5.43e-06	#ERROR!
SKIDA1	THAP9	0.269408	1.17e-07	0.827024	5.4e-09	4.54625	5.46e-06	#ERROR!
LRRN2	THAP9	0.135807	0.008456	0.777493	1.65e-07	4.5459	5.47e-06	#ERROR!
AKAP10	THAP9	0.624374	0	0.926686	2.75e-14	4.54547	5.48e-06	#ERROR!
CUZD1	THAP9	0.434104	0	0.878049	4.08e-11	4.54536	5.48e-06	#ERROR!
NUP133	THAP9	0.66486	0	0.93585	4e-15	4.54449	5.51e-06	#ERROR!
PDGFC	THAP9	0.279468	3.72e-08	0.830279	4.15e-09	4.54378	5.53e-06	#ERROR!
DOCK4	THAP9	0.449381	0	0.882229	2.49e-11	4.54319	5.54e-06	#ERROR!
ACKR1	THAP9	-0.01625	0.75376	0.708944	5.59e-06	4.54067	5.61e-06	0/+
EML5	THAP9	0.30899	9.73e-10	0.839751	1.88e-09	4.53859	5.66e-06	#ERROR!
LOC102724488	THAP9	0.160237	0.001853	0.786612	9.42e-08	4.53836	5.67e-06	#ERROR!
NR2C1	THAP9	0.550723	0	0.908724	6.53e-13	4.53776	5.69e-06	#ERROR!
LRIG3	THAP9	0.403211	4.44e-16	0.868768	1.15e-10	4.53688	5.71e-06	#ERROR!
SCPEP1	THAP9	0.214061	2.92e-05	0.806818	2.45e-08	4.53619	5.73e-06	#ERROR!
NFKB1	THAP9	0.38627	8.66e-15	0.863636	1.97e-10	4.53443	5.78e-06	#ERROR!
PCDHGB5	THAP9	0.133672	0.009554	0.775548	1.86e-07	4.53217	5.84e-06	#ERROR!
ARL10	THAP9	0.307103	1.24e-09	0.83871	2.05e-09	4.53136	5.86e-06	#ERROR!
HOXB4	THAP9	0.082967	0.108702	0.754101	6.23e-07	4.53023	5.89e-06	0/+
CMAHP	THAP9	0.247122	1.27e-06	0.818257	1.06e-08	4.52991	5.9e-06	#ERROR!
RECQL	THAP9	0.480199	0	0.890029	9.4e-12	4.52815	5.95e-06	#ERROR!
EFEMP1	THAP9	0.088579	0.086718	0.756232	5.56e-07	4.52672	5.99e-06	0/+
TGFB3	THAP9	0.133534	0.00963	0.774927	1.93e-07	4.52504	6.04e-06	#ERROR!
LOC100507144	THAP9	0.134001	0.009378	0.774849	1.93e-07	4.52166	6.14e-06	#ERROR!
ROBO1	THAP9	0.329108	6.37e-11	0.845202	1.16e-09	4.52038	6.17e-06	#ERROR!
BOLA3-AS1	THAP9	0.187982	0.000251	0.79593	5.16e-08	4.51977	6.19e-06	#ERROR!
CHODL	THAP9	0.043396	0.402058	0.735472	1.62e-06	4.51956	6.2e-06	0/+
NEPRO	THAP9	0.711167	0	0.945381	4.44e-16	4.51833	6.23e-06	#ERROR!
RNU4-9P	THAP9	0.069242	0.180896	0.746978	9.08e-07	4.51759	6.25e-06	0/+
GGTA1	THAP9	0.069525	0.179118	0.747067	9.04e-07	4.51718	6.27e-06	0/+
NPIPB9	THAP9	0.326535	9.13e-11	0.844176	1.27e-09	4.51687	6.28e-06	#ERROR!
STAG2	THAP9	0.674531	0	0.937317	2.66e-15	4.51629	6.29e-06	#ERROR!
OSBPL8	THAP9	0.557019	0	0.909457	5.82e-13	4.51329	6.38e-06	#ERROR!
TACR1	THAP9	0.159759	0.001914	0.784418	1.08e-07	4.51197	6.42e-06	#ERROR!
NOTCH4	THAP9	0.260841	3e-07	0.821848	8.1e-09	4.51126	6.44e-06	#ERROR!
HIF3A	THAP9	0.15176	0.003218	0.781158	1.32e-07	4.51086	6.46e-06	#ERROR!
PALLD	THAP9	0.223996	1.19e-05	0.808651	2.15e-08	4.51019	6.48e-06	#ERROR!
BNC2	THAP9	0.126117	0.014531	0.770528	2.49e-07	4.50804	6.54e-06	#ERROR!
GPX8	THAP9	0.206587	5.56e-05	0.802053	3.41e-08	4.50755	6.56e-06	#ERROR!
SCAMP1	THAP9	0.5726	0	0.913123	3.21e-13	4.50695	6.58e-06	#ERROR!
MAMSTR	THAP9	0.244311	1.68e-06	0.815616	1.3e-08	4.50498	6.64e-06	#ERROR!
MRC2	THAP9	0.100146	0.052657	0.759164	4.74e-07	4.50261	6.71e-06	0/+
NAP1L2	THAP9	0.135374	0.008669	0.773827	2.05e-07	4.50176	6.74e-06	#ERROR!
ANGPTL1	THAP9	0.075142	0.146414	0.748167	8.53e-07	4.50129	6.75e-06	0/+
PLPPR4	THAP9	0.187644	0.000258	0.794279	5.75e-08	4.49893	6.83e-06	#ERROR!
DMXL1	THAP9	0.566762	0	0.91129	4.33e-13	4.49549	6.94e-06	#ERROR!
RBMS3	THAP9	0.254465	5.92e-07	0.818548	1.04e-08	4.49488	6.96e-06	#ERROR!
SPIN3	THAP9	0.51666	0	0.898359	3.05e-12	4.49315	7.02e-06	#ERROR!
SLC35G2	THAP9	0.3029	2.13e-09	0.835044	2.8e-09	4.49307	7.02e-06	#ERROR!
GUSBP1	THAP9	0.648017	0	0.930718	1.2e-14	4.49307	7.02e-06	#ERROR!
ST8SIA6	THAP9	0.066477	0.198985	0.743559	1.08e-06	4.49284	7.03e-06	0/+
PHLDA3	THAP9	-0.01985	0.701632	0.702346	7.44e-06	4.49259	7.04e-06	0/+
ESR1	THAP9	0.150164	0.00356	0.778918	1.52e-07	4.49027	7.11e-06	#ERROR!
FMO1	THAP9	0.077037	0.136473	0.748006	8.6e-07	4.48985	7.13e-06	0/+
KCNQ5	THAP9	0.059815	0.247897	0.740103	1.29e-06	4.48782	7.2e-06	0/+
BLVRA	THAP9	0.124012	0.016272	0.767962	2.89e-07	4.48715	7.22e-06	#ERROR!
TCEAL2	THAP9	-0.00633	0.902709	0.708578	5.68e-06	4.48699	7.22e-06	0/+
FAM185A	THAP9	0.563645	0	0.910174	5.19e-13	4.48559	7.27e-06	#ERROR!
TAF1B	THAP9	0.526462	0	0.900642	2.21e-12	4.48555	7.27e-06	#ERROR!
ICE2	THAP9	0.73144	0	0.949047	0	4.48509	7.29e-06	#ERROR!
RTL8B	THAP9	0.113338	0.028197	0.763196	3.79e-07	4.48368	7.34e-06	#ERROR!
MSH6	THAP9	0.580308	0	0.914223	2.67e-13	4.48233	7.38e-06	#ERROR!
TMEM108	THAP9	0.144409	0.005081	0.775914	1.82e-07	4.48165	7.41e-06	#ERROR!
MAK	THAP9	0.474249	0	0.886424	1.49e-11	4.48089	7.43e-06	#ERROR!
DKK2	THAP9	0.11603	0.024639	0.763956	3.63e-07	4.47912	7.5e-06	#ERROR!
CSDC2	THAP9	0.000912	0.985949	0.711392	5.01e-06	4.47907	7.5e-06	0/+
NUDT21	THAP9	0.614314	0	0.922287	6.42e-14	4.47515	7.64e-06	#ERROR!
GXYLT2	THAP9	0.232005	5.63e-06	0.809166	2.07e-08	4.47513	7.64e-06	#ERROR!
FECH	THAP9	0.483871	0	0.888828	1.1e-11	4.47507	7.64e-06	#ERROR!
GUCY1A2	THAP9	0.372275	9.02e-14	0.856305	4.11e-10	4.47494	7.64e-06	#ERROR!
SESN1	THAP9	0.424746	0	0.872067	8.03e-11	4.47451	7.66e-06	#ERROR!
FAM66C	THAP9	0.22724	8.83e-06	0.807371	2.36e-08	4.47439	7.66e-06	#ERROR!
NOG	THAP9	-0.00718	0.889832	0.706888	6.11e-06	4.47419	7.67e-06	0/+
DDR2	THAP9	0.157044	0.002289	0.780425	1.38e-07	4.47413	7.67e-06	#ERROR!
TRPC6	THAP9	0.338006	1.79e-11	0.845385	1.14e-09	4.47318	7.71e-06	#ERROR!
NRG2	THAP9	0.057091	0.270123	0.737537	1.47e-06	4.47312	7.71e-06	0/+
TRAPPC13	THAP9	0.627182	0	0.92522	3.69e-14	4.47041	7.81e-06	#ERROR!
GDAP1	THAP9	0.398504	8.88e-16	0.864003	1.9e-10	4.46885	7.86e-06	#ERROR!
BOK	THAP9	0.169254	0.001	0.784824	1.05e-07	4.46812	7.89e-06	#ERROR!
RRAD	THAP9	-0.10121	0.050178	0.655729	4.62e-05	4.46778	7.9e-06	0/+
BICC1	THAP9	0.126104	0.014541	0.767229	3.01e-07	4.46745	7.92e-06	#ERROR!
AURKC	THAP9	0.319881	2.28e-10	0.839094	1.99e-09	4.46651	7.95e-06	#ERROR!
CRTAP	THAP9	0.217366	2.18e-05	0.803152	3.16e-08	4.46627	7.96e-06	#ERROR!
EFS	THAP9	0.064885	0.209982	0.740469	1.27e-06	4.46626	7.96e-06	0/+
TENM2	THAP9	0.010442	0.840279	0.714809	4.3e-06	4.46609	7.97e-06	0/+
LINC02613	THAP9	0.094303	0.068131	0.753488	6.44e-07	4.46551	7.99e-06	0/+
STX1B	THAP9	0.200246	9.44e-05	0.796554	4.95e-08	4.46416	8.04e-06	#ERROR!
CD300LG	THAP9	0.010531	0.838928	0.7146	4.34e-06	4.46349	8.06e-06	0/+
PYGO1	THAP9	0.276058	5.51e-08	0.824047	6.82e-09	4.46297	8.08e-06	#ERROR!
METTL3	THAP9	0.611315	0	0.921188	7.86e-14	4.46251	8.1e-06	#ERROR!
FMNL2	THAP9	0.553928	0	0.906891	8.69e-13	4.46203	8.12e-06	#ERROR!
CGGBP1	THAP9	0.672419	0	0.935484	4.44e-15	4.46078	8.17e-06	#ERROR!
ATRNL1	THAP9	0.265163	1.88e-07	0.820057	9.29e-09	4.4602	8.19e-06	#ERROR!
INSYN1	THAP9	0.018421	0.722168	0.718109	3.7e-06	4.46004	8.19e-06	0/+
LRRK2	THAP9	0.185989	0.000293	0.790689	7.26e-08	4.45894	8.24e-06	#ERROR!
DDX20	THAP9	0.642572	0	0.928519	1.91e-14	4.45848	8.25e-06	#ERROR!
CFAP91	THAP9	0.274707	6.44e-08	0.823281	7.24e-09	4.45835	8.26e-06	#ERROR!
SDCCAG8	THAP9	0.505266	0	0.89396	5.59e-12	4.45826	8.26e-06	#ERROR!
PRDM6	THAP9	0.096005	0.063282	0.753551	6.42e-07	4.4576	8.29e-06	0/+
EXOSC3	THAP9	0.467261	0	0.883431	2.15e-11	4.4566	8.33e-06	#ERROR!
HMCN1	THAP9	0.221892	1.45e-05	0.804033	2.98e-08	4.45483	8.4e-06	#ERROR!
POLK	THAP9	0.559347	0	0.907991	7.33e-13	4.45386	8.43e-06	#ERROR!
RNF212	THAP9	0.090623	0.079662	0.750871	7.4e-07	4.45385	8.43e-06	0/+
TSHZ3	THAP9	0.113227	0.028353	0.76063	4.37e-07	4.45344	8.45e-06	#ERROR!
ITGA10	THAP9	0.344631	6.75e-12	0.846302	1.05e-09	4.45163	8.52e-06	#ERROR!
MARCO	THAP9	-0.07422	0.151425	0.668867	2.85e-05	4.44868	8.64e-06	0/+
FAM189A2	THAP9	0.053629	0.300298	0.733504	1.79e-06	4.44636	8.73e-06	0/+
LHFPL6	THAP9	0.134653	0.009035	0.769062	2.71e-07	4.44616	8.74e-06	#ERROR!
SYCE2	THAP9	0.335207	2.68e-11	0.842916	1.42e-09	4.4458	8.76e-06	#ERROR!
INMT	THAP9	0.100718	0.051315	0.754468	6.11e-07	4.44432	8.82e-06	0/+
DTD2	THAP9	0.481263	0	0.88673	1.43e-11	4.44231	8.9e-06	#ERROR!
MAP3K7	THAP9	0.71867	0	0.945381	4.44e-16	4.44101	8.95e-06	#ERROR!
ADGRL2	THAP9	0.33016	5.49e-11	0.840909	1.7e-09	4.43966	9.01e-06	#ERROR!
PPP2R3A	THAP9	0.282628	2.57e-08	0.82478	6.44e-09	4.4386	9.05e-06	#ERROR!
AP3B2	THAP9	0.152548	0.003061	0.775731	1.84e-07	4.4374	9.11e-06	#ERROR!
GOLGA8IP	THAP9	0.283033	2.45e-08	0.824835	6.42e-09	4.43724	9.11e-06	#ERROR!
DTWD2	THAP9	0.482045	0	0.88673	1.43e-11	4.43719	9.11e-06	#ERROR!
PCP4L1	THAP9	0.088507	0.086976	0.748488	8.39e-07	4.43718	9.11e-06	0/+
AS3MT	THAP9	0.088123	0.088361	0.74812	8.55e-07	4.43492	9.21e-06	0/+
RIC3	THAP9	0.089884	0.082157	0.7489	8.21e-07	4.43492	9.21e-06	0/+
PINLYP	THAP9	0.146707	0.004415	0.773094	2.15e-07	4.43431	9.24e-06	#ERROR!
KCNAB1	THAP9	0.445505	0	0.87618	5.06e-11	4.43333	9.28e-06	#ERROR!
MEOX1	THAP9	0.102243	0.047872	0.754032	6.26e-07	4.43147	9.36e-06	#ERROR!
CLIP4	THAP9	0.172713	0.000783	0.78288	1.19e-07	4.42477	9.65e-06	#ERROR!
HSPB8	THAP9	0.003178	0.951084	0.707111	6.05e-06	4.42426	9.68e-06	0/+
MAP3K14	THAP9	0.248368	1.12e-06	0.811658	1.73e-08	4.42422	9.68e-06	#ERROR!
MSL2	THAP9	0.590874	0	0.914956	2.36e-13	4.4239	9.69e-06	#ERROR!
PRICKLE1	THAP9	0.135292	0.00871	0.767369	2.99e-07	4.42208	9.78e-06	#ERROR!
HEY2	THAP9	0.252574	7.22e-07	0.812907	1.58e-08	4.42011	9.87e-06	#ERROR!
SLF2	THAP9	0.631843	0	0.924853	3.95e-14	4.41872	9.93e-06	#ERROR!
TACC1	THAP9	0.300296	2.97e-09	0.829545	4.41e-09	4.41735	9.99e-06	#ERROR!
AHNAK2	THAP9	0.021776	0.674248	0.715543	4.16e-06	4.41654	1e-05	0/+
FAM86B3P	THAP9	0.519878	0	0.896242	4.1e-12	4.41624	1e-05	#ERROR!
AK4	THAP9	0.264466	2.02e-07	0.816716	1.19e-08	4.413	1.02e-05	#ERROR!
CLBA1	THAP9	0.461168	0	0.879663	3.38e-11	4.41054	1.03e-05	#ERROR!
LINC02511	THAP9	0.158256	0.002114	0.775935	1.81e-07	4.41051	1.03e-05	#ERROR!
CCDC74A	THAP9	0.103198	0.045816	0.752521	6.78e-07	4.409	1.04e-05	#ERROR!
LOC105374618	THAP9	-0.01719	0.740091	0.695046	1.01e-05	4.40732	1.05e-05	0/+
AFAP1L2	THAP9	0.225638	1.02e-05	0.802053	3.41e-08	4.40687	1.05e-05	#ERROR!
FHL3	THAP9	0.11816	0.022107	0.758798	4.83e-07	4.40641	1.05e-05	#ERROR!
NOVA1	THAP9	0.140073	0.006591	0.768032	2.88e-07	4.40566	1.05e-05	#ERROR!
AOPEP	THAP9	0.307996	1.11e-09	0.831378	3.8e-09	4.40436	1.06e-05	#ERROR!
DUBR	THAP9	0.319159	2.52e-10	0.835121	2.78e-09	4.40366	1.06e-05	#ERROR!
HAUS3	THAP9	0.695771	0	0.939419	1.78e-15	4.4032	1.07e-05	#ERROR!
MLH1	THAP9	0.356875	1.05e-12	0.847507	9.42e-10	4.40277	1.07e-05	#ERROR!
CAV1	THAP9	0.107962	0.036635	0.754032	6.26e-07	4.40233	1.07e-05	#ERROR!
LOC100131315	THAP9	0.007083	0.891262	0.706886	6.11e-06	4.40232	1.07e-05	0/+
CALHM2	THAP9	0.089389	0.083865	0.74567	9.71e-07	4.40057	1.08e-05	0/+
MMRN2	THAP9	0.170361	0.000925	0.780059	1.41e-07	4.40047	1.08e-05	#ERROR!
KANK3	THAP9	0.106837	0.038648	0.753368	6.48e-07	4.40032	1.08e-05	#ERROR!
KLHL5	THAP9	0.340453	1.25e-11	0.842009	1.54e-09	4.40022	1.08e-05	#ERROR!
MAP3K3	THAP9	0.254644	5.81e-07	0.812317	1.65e-08	4.40021	1.08e-05	#ERROR!
PRRT3	THAP9	0.377991	3.51e-14	0.854106	5.08e-10	4.40018	1.08e-05	#ERROR!
FAM180A	THAP9	0.003467	0.946656	0.704793	6.7e-06	4.39953	1.08e-05	0/+
NOP53-AS1	THAP9	0.375776	5.06e-14	0.853364	5.45e-10	4.39941	1.09e-05	#ERROR!
LOC100129434	THAP9	0.220426	1.65e-05	0.799523	4.05e-08	4.39898	1.09e-05	#ERROR!
CTF1	THAP9	0.054718	0.290576	0.729539	2.17e-06	4.39789	1.09e-05	0/+
FBXO38	THAP9	0.645013	0	0.927419	2.4e-14	4.39758	1.09e-05	#ERROR!
HNF4G	THAP9	0.385646	9.55e-15	-0.43497	0.012848	-4.39649	1.1e-05	#ERROR!
POLR1F	THAP9	0.501555	0	0.890396	8.96e-12	4.39528	1.11e-05	#ERROR!
PDZRN4	THAP9	0.009764	0.85052	0.70736	5.99e-06	4.39358	1.11e-05	0/+
TRPC1	THAP9	0.305718	1.49e-09	0.829912	4.28e-09	4.3932	1.12e-05	#ERROR!
GAS1	THAP9	-0.05099	0.324772	0.675587	2.21e-05	4.39291	1.12e-05	0/+
PPP1R3E	THAP9	0.548128	0	0.902859	1.6e-12	4.39187	1.12e-05	#ERROR!
GMNC	THAP9	0.12031	0.01978	0.758449	4.92e-07	4.39128	1.13e-05	#ERROR!
NTAN1	THAP9	0.107187	0.038012	0.752704	6.72e-07	4.39081	1.13e-05	#ERROR!
MEMO1	THAP9	0.39496	1.78e-15	0.858766	3.23e-10	4.38778	1.15e-05	#ERROR!
TASOR2	THAP9	0.664825	0	0.931818	9.77e-15	4.386	1.15e-05	#ERROR!
TLL1	THAP9	0.139407	0.006855	0.765973	3.24e-07	4.38389	1.17e-05	#ERROR!
SP3	THAP9	0.693483	0	0.938416	2.22e-15	4.38283	1.17e-05	#ERROR!
EBF3	THAP9	0.206376	5.66e-05	0.792961	6.27e-08	4.38281	1.17e-05	#ERROR!
DUS4L	THAP9	0.561726	0	0.906058	9.88e-13	4.38145	1.18e-05	#ERROR!
HSPB1	THAP9	-0.14195	0.005895	0.620968	0.000149	4.38037	1.18e-05	-/+
RBMS1	THAP9	0.303849	1.89e-09	0.828446	4.82e-09	4.37994	1.19e-05	#ERROR!
BCHE	THAP9	0.081099	0.116923	0.739736	1.31e-06	4.37597	1.21e-05	0/+
EPHA1-AS1	THAP9	0.182695	0.000376	0.782936	1.18e-07	4.37358	1.22e-05	#ERROR!
SLC25A46	THAP9	0.453548	0	0.875733	5.32e-11	4.37287	1.23e-05	#ERROR!
FAP	THAP9	0.090191	0.081112	0.743538	1.08e-06	4.3724	1.23e-05	0/+
PTN	THAP9	0.079707	0.12336	0.738636	1.39e-06	4.37082	1.24e-05	0/+
NOC3L	THAP9	0.628669	0	0.922654	6e-14	4.3697	1.24e-05	#ERROR!
PLN	THAP9	0.034096	0.510373	0.717009	3.89e-06	4.36959	1.24e-05	0/+
FZD1	THAP9	0.277649	4.59e-08	0.818548	1.04e-08	4.36918	1.25e-05	#ERROR!
OLFM2	THAP9	0.05412	0.295888	0.72654	2.5e-06	4.36876	1.25e-05	0/+
FGF7	THAP9	0.103824	0.04451	0.749267	8.06e-07	4.36823	1.25e-05	#ERROR!
FBXL7	THAP9	0.183967	0.000342	0.782991	1.18e-07	4.36766	1.26e-05	#ERROR!
ACTA2-AS1	THAP9	0.167016	0.001169	0.776098	1.8e-07	4.36725	1.26e-05	#ERROR!
PMS1	THAP9	0.713012	0	0.942449	8.88e-16	4.36393	1.28e-05	#ERROR!
CLEC4G	THAP9	-0.07655	0.138959	0.658105	4.24e-05	4.36362	1.28e-05	0/+
SALL2	THAP9	0.221003	1.57e-05	0.797177	4.75e-08	4.36333	1.28e-05	#ERROR!
EMCN	THAP9	0.19692	0.000124	0.787757	8.76e-08	4.3626	1.29e-05	#ERROR!
CEP83	THAP9	0.638518	0	0.924853	3.95e-14	4.36234	1.29e-05	#ERROR!
DCBLD2	THAP9	0.373149	7.82e-14	0.85044	7.18e-10	4.36109	1.29e-05	#ERROR!
TMEM159	THAP9	0.166264	0.001232	0.775293	1.88e-07	4.36097	1.29e-05	#ERROR!
TNFAIP8	THAP9	0.22656	9.4e-06	0.79912	4.17e-08	4.36083	1.3e-05	#ERROR!
ITGAV	THAP9	0.42141	0	0.865469	1.63e-10	4.35942	1.3e-05	#ERROR!
KITLG	THAP9	0.354285	1.57e-12	0.844208	1.27e-09	4.35929	1.3e-05	#ERROR!
FER	THAP9	0.451966	0	0.874633	6.03e-11	4.35923	1.31e-05	#ERROR!
BBOF1	THAP9	0.431387	0	0.868402	1.2e-10	4.35746	1.32e-05	#ERROR!
PMP2	THAP9	0.039576	0.444789	0.718203	3.69e-06	4.35435	1.33e-05	0/+
PIK3CA	THAP9	0.602698	0	0.915689	2.08e-13	4.35415	1.34e-05	#ERROR!
EPHA4	THAP9	0.240422	2.48e-06	0.803886	3.01e-08	4.35411	1.34e-05	#ERROR!
SUZ12	THAP9	0.650155	0	0.927419	2.4e-14	4.35297	1.34e-05	#ERROR!
EFCAB1	THAP9	0.078029	0.131483	0.736197	1.57e-06	4.35238	1.35e-05	0/+
CACHD1	THAP9	0.375797	5.04e-14	0.850806	6.94e-10	4.35225	1.35e-05	#ERROR!
ISM1	THAP9	0.049999	0.334241	0.722889	2.97e-06	4.35084	1.36e-05	0/+
ART4	THAP9	0.132976	0.00994	0.760464	4.41e-07	4.35042	1.36e-05	#ERROR!
HACD1	THAP9	0.029279	0.571929	0.712675	4.73e-06	4.34924	1.37e-05	0/+
TCEAL3	THAP9	0.186889	0.000274	0.782625	1.21e-07	4.34765	1.38e-05	#ERROR!
COPS3	THAP9	0.491712	0	0.88563	1.64e-11	4.34755	1.38e-05	#ERROR!
CACNA2D3	THAP9	0.10168	0.04912	0.746403	9.35e-07	4.34641	1.38e-05	#ERROR!
SENP7	THAP9	0.571183	0	0.907258	8.21e-13	4.34526	1.39e-05	#ERROR!
MAP2	THAP9	0.28301	2.45e-08	0.818882	1.02e-08	4.34496	1.39e-05	#ERROR!
GPR26	THAP9	0.070819	0.171142	0.732134	1.91e-06	4.3445	1.4e-05	0/+
MSANTD2	THAP9	0.632824	0	0.922922	5.68e-14	4.34403	1.4e-05	#ERROR!
GPR1	THAP9	0.038217	0.4606	0.716421	4e-06	4.34271	1.41e-05	0/+
TMEM74	THAP9	0.16504	0.00134	0.773294	2.12e-07	4.34216	1.41e-05	#ERROR!
MAGI2	THAP9	0.246297	1.38e-06	0.805242	2.74e-08	4.34202	1.41e-05	#ERROR!
KIF26A	THAP9	0.203742	7.07e-05	0.788856	8.17e-08	4.34143	1.42e-05	#ERROR!
LMO2	THAP9	0.186528	0.000281	0.781891	1.26e-07	4.34001	1.42e-05	#ERROR!
PEA15	THAP9	0.132065	0.010464	0.759164	4.74e-07	4.3396	1.43e-05	#ERROR!
INPP4B	THAP9	0.304868	1.66e-09	0.826246	5.74e-09	4.33916	1.43e-05	#ERROR!
NDRG2	THAP9	0.198732	0.000107	0.786657	9.39e-08	4.33853	1.43e-05	#ERROR!
DIO3OS	THAP9	0.104331	0.043473	0.74686	9.13e-07	4.33811	1.44e-05	#ERROR!
PRIMPOL	THAP9	0.665514	0	0.930718	1.2e-14	4.33803	1.44e-05	#ERROR!
SPARCL1	THAP9	0.149827	0.003636	0.766496	3.14e-07	4.33664	1.45e-05	#ERROR!
ANKRD65	THAP9	0.104866	0.042403	0.746953	9.09e-07	4.33644	1.45e-05	#ERROR!
SETBP1-DT	THAP9	0.073442	0.155794	0.732606	1.87e-06	4.33636	1.45e-05	0/+
TRMT13	THAP9	0.711388	0	0.941435	8.88e-16	4.33526	1.46e-05	#ERROR!
CSRP2	THAP9	0.183005	0.000368	0.780059	1.41e-07	4.33472	1.46e-05	#ERROR!
HERPUD2	THAP9	0.539784	0	0.89846	3.01e-12	4.33418	1.46e-05	#ERROR!
CCT6P3	THAP9	0.600108	0	0.914223	2.67e-13	4.32923	1.5e-05	#ERROR!
NFIX	THAP9	0.175109	0.000659	0.776393	1.76e-07	4.32899	1.5e-05	#ERROR!
RTTN	THAP9	0.648446	0	0.92632	2.98e-14	4.32853	1.5e-05	#ERROR!
PLXDC1	THAP9	0.246199	1.39e-06	0.804252	2.93e-08	4.32839	1.5e-05	#ERROR!
CSGALNACT1	THAP9	0.399488	8.88e-16	0.857038	3.82e-10	4.32772	1.51e-05	#ERROR!
SPATA4	THAP9	0.111624	0.030685	0.749176	8.09e-07	4.32742	1.51e-05	#ERROR!
KCNT2	THAP9	0.245054	1.56e-06	0.803593	3.07e-08	4.32514	1.52e-05	#ERROR!
AIDA	THAP9	0.521117	0	0.892962	6.39e-12	4.32492	1.53e-05	#ERROR!
AP3M1	THAP9	0.615128	0	0.917889	1.42e-13	4.3241	1.53e-05	#ERROR!
C1QTNF1	THAP9	0.128472	0.012779	0.756232	5.56e-07	4.32332	1.54e-05	#ERROR!
CHM	THAP9	0.678112	0	0.933284	7.11e-15	4.32075	1.55e-05	#ERROR!
AMIGO2	THAP9	0.148633	0.003918	0.76455	3.51e-07	4.31911	1.57e-05	#ERROR!
RILPL1	THAP9	0.236602	3.61e-06	0.799927	3.94e-08	4.31863	1.57e-05	#ERROR!
CITED2	THAP9	0.200725	9.08e-05	0.785924	9.84e-08	4.3184	1.57e-05	#ERROR!
NEGR1	THAP9	0.17696	0.000576	0.776281	1.78e-07	4.31794	1.57e-05	#ERROR!
ATP8B4	THAP9	0.252666	7.15e-07	0.805905	2.61e-08	4.31731	1.58e-05	#ERROR!
RGS11	THAP9	0.138034	0.00743	0.759784	4.58e-07	4.31634	1.59e-05	#ERROR!
ANKIB1	THAP9	0.622028	0	0.919355	1.1e-13	4.3151	1.6e-05	#ERROR!
RUNX1T1	THAP9	0.14307	0.00551	0.76173	4.11e-07	4.31374	1.61e-05	#ERROR!
SNHG26	THAP9	0.34187	1.02e-11	0.837397	2.3e-09	4.31334	1.61e-05	#ERROR!
DIMT1	THAP9	0.530809	0	0.895161	4.75e-12	4.31264	1.61e-05	#ERROR!
AP3M2	THAP9	0.55784	0	0.902493	1.69e-12	4.31142	1.62e-05	#ERROR!
OTUD6B	THAP9	0.626394	0	0.920341	9.17e-14	4.31135	1.62e-05	#ERROR!
SPTBN4	THAP9	0.139278	0.006907	0.759897	4.55e-07	4.31131	1.62e-05	#ERROR!
MAP3K7CL	THAP9	0.342982	8.62e-12	0.837444	2.29e-09	4.30779	1.65e-05	#ERROR!
PTEN	THAP9	0.477541	0	0.879765	3.34e-11	4.30704	1.65e-05	#ERROR!
SFRP1	THAP9	0.038316	0.459428	0.712977	4.67e-06	4.30674	1.66e-05	0/+
FOXN3	THAP9	0.380162	2.44e-14	0.849707	7.69e-10	4.3066	1.66e-05	#ERROR!
SNED1	THAP9	0.257382	4.35e-07	0.806818	2.45e-08	4.30506	1.67e-05	#ERROR!
CELF2	THAP9	0.191449	0.000192	0.781158	1.32e-07	4.30482	1.67e-05	#ERROR!
LOC105373383	THAP9	0.178973	0.000497	0.776056	1.8e-07	4.30463	1.67e-05	#ERROR!
MIR125B2	THAP9	0.028359	0.584075	0.707757	5.89e-06	4.30388	1.68e-05	0/+
LDOC1	THAP9	0.070213	0.174841	0.728073	2.33e-06	4.30376	1.68e-05	0/+
HOXD9	THAP9	0.139062	0.006996	0.759076	4.76e-07	4.30264	1.69e-05	#ERROR!
SLC2A4	THAP9	0.117268	0.023138	0.749519	7.95e-07	4.30256	1.69e-05	#ERROR!
ABI3BP	THAP9	0.134864	0.008926	0.757217	5.27e-07	4.30217	1.69e-05	#ERROR!
RAB12	THAP9	0.229199	7.35e-06	0.795821	5.19e-08	4.30115	1.7e-05	#ERROR!
ANGEL2	THAP9	0.71594	0	0.941716	8.88e-16	4.30096	1.7e-05	#ERROR!
LTV1	THAP9	0.606559	0	0.914956	2.36e-13	4.30072	1.7e-05	#ERROR!
TIMP3	THAP9	0.035086	0.49817	0.710777	5.15e-06	4.30058	1.7e-05	0/+
LINC00304	THAP9	0.177125	0.000569	0.774945	1.92e-07	4.3002	1.71e-05	#ERROR!
ALKBH8	THAP9	0.710832	0	0.940508	1.33e-15	4.30014	1.71e-05	#ERROR!
DNAH9	THAP9	0.154141	0.002764	0.765236	3.38e-07	4.29905	1.72e-05	#ERROR!
ARSK	THAP9	0.535696	0	0.895977	4.25e-12	4.29898	1.72e-05	#ERROR!
TMEM132C	THAP9	-0.00376	0.942155	0.690742	1.21e-05	4.29796	1.72e-05	0/+
LOC101929532	THAP9	0.078513	0.1291	0.731383	1.98e-06	4.29739	1.73e-05	0/+
MLH3	THAP9	0.638423	0	0.922922	5.68e-14	4.2967	1.73e-05	#ERROR!
FGF2	THAP9	0.147479	0.004209	0.762097	4.03e-07	4.29545	1.74e-05	#ERROR!
MS4A4E	THAP9	0.180371	0.000448	0.775893	1.82e-07	4.29527	1.74e-05	#ERROR!
CDC27	THAP9	0.644903	0	0.924487	4.22e-14	4.29493	1.75e-05	#ERROR!
PDLIM3	THAP9	0.010994	0.831955	0.697947	8.97e-06	4.29372	1.76e-05	0/+
RPP30	THAP9	0.446909	0	0.869868	1.02e-10	4.29077	1.78e-05	#ERROR!
TRIM52	THAP9	0.623836	0	0.918988	1.17e-13	4.28832	1.8e-05	#ERROR!
CHD9	THAP9	0.542256	0	0.897361	3.51e-12	4.28798	1.8e-05	#ERROR!
SYNPO2	THAP9	0.094507	0.067534	0.737903	1.44e-06	4.28757	1.81e-05	0/+
LANCL3	THAP9	0.218576	1.95e-05	0.790651	7.28e-08	4.28724	1.81e-05	#ERROR!
EVC	THAP9	0.151757	0.003219	0.763196	3.79e-07	4.28665	1.81e-05	#ERROR!
TBX18	THAP9	0.10576	0.040665	0.742941	1.12e-06	4.28648	1.82e-05	#ERROR!
CCN3	THAP9	0.178076	0.000531	0.774223	2.01e-07	4.28615	1.82e-05	#ERROR!
RANBP6	THAP9	0.576077	0	0.906425	9.34e-13	4.28489	1.83e-05	#ERROR!
MYRF-AS1	THAP9	0.1746	0.000684	-0.58767	0.000405	-4.28471	1.83e-05	#ERROR!
MAP7D3	THAP9	0.257466	4.31e-07	0.805352	2.72e-08	4.28351	1.84e-05	#ERROR!
SNX29	THAP9	0.257502	4.3e-07	0.805352	2.72e-08	4.28332	1.84e-05	#ERROR!
NUDT11	THAP9	0.11088	0.031823	0.744706	1.02e-06	4.28029	1.87e-05	#ERROR!
GTF2H3	THAP9	0.538192	0	0.895894	4.3e-12	4.27922	1.88e-05	#ERROR!
PEAR1	THAP9	0.301667	2.5e-09	0.821114	8.56e-09	4.27651	1.9e-05	#ERROR!
EDNRA	THAP9	0.229482	7.15e-06	0.794061	5.83e-08	4.27556	1.91e-05	#ERROR!
NCKAP5L	THAP9	0.297896	4.01e-09	0.819648	9.58e-09	4.27479	1.91e-05	#ERROR!
PPFIBP1	THAP9	0.503261	0	0.88563	1.64e-11	4.27022	1.95e-05	#ERROR!
ACKR2	THAP9	0.179195	0.000489	0.773377	2.11e-07	4.26971	1.96e-05	#ERROR!
LINC00462	THAP9	-0.0405	0.434171	0.667898	2.96e-05	4.26941	1.96e-05	0/+
CD44	THAP9	0.146631	0.004435	0.759531	4.64e-07	4.26912	1.96e-05	#ERROR!
LINC00472	THAP9	0.160388	0.001835	0.765392	3.35e-07	4.26868	1.97e-05	#ERROR!
MARK1	THAP9	0.284012	2.18e-08	0.81415	1.45e-08	4.26794	1.97e-05	#ERROR!
DCAF4	THAP9	0.493881	0	0.882779	2.33e-11	4.26726	1.98e-05	#ERROR!
INA	THAP9	0.052396	0.311561	0.715975	4.08e-06	4.26652	1.99e-05	0/+
NFASC	THAP9	0.182653	0.000378	0.774448	1.98e-07	4.26515	2e-05	#ERROR!
CAPRIN2	THAP9	0.48787	0	0.880865	2.93e-11	4.2638	2.01e-05	#ERROR!
ASPH	THAP9	0.420527	0	0.860337	2.76e-10	4.26358	2.01e-05	#ERROR!
FAM126A	THAP9	0.368627	1.63e-13	0.843475	1.35e-09	4.26335	2.01e-05	#ERROR!
TIGD7	THAP9	0.440373	0	0.866465	1.47e-10	4.26215	2.02e-05	#ERROR!
C5orf24	THAP9	0.611479	0	0.914956	2.36e-13	4.26132	2.03e-05	#ERROR!
MYOCD	THAP9	0.105569	0.04103	0.740469	1.27e-06	4.25977	2.05e-05	#ERROR!
CD93	THAP9	0.246484	1.35e-06	0.799487	4.06e-08	4.25962	2.05e-05	#ERROR!
LINC00092	THAP9	0.093812	0.069585	0.735038	1.66e-06	4.25955	2.05e-05	0/+
EPHA5	THAP9	0.074333	0.15082	0.725872	2.58e-06	4.25938	2.05e-05	0/+
AADAT	THAP9	0.383574	1.38e-14	0.848185	8.85e-10	4.25902	2.05e-05	#ERROR!
AKT3	THAP9	0.229639	7.05e-06	0.792889	6.3e-08	4.25877	2.06e-05	#ERROR!
OTUD7A	THAP9	0.299882	3.13e-09	0.819282	9.85e-09	4.25819	2.06e-05	#ERROR!
FGF7P6	THAP9	0.097356	0.059636	0.736516	1.54e-06	4.25777	2.06e-05	0/+
EPO	THAP9	0.221214	1.54e-05	0.789485	7.85e-08	4.25764	2.07e-05	#ERROR!
CEP170	THAP9	0.469278	0	0.875	5.79e-11	4.25639	2.08e-05	#ERROR!
TMEM168	THAP9	0.60661	0	0.91349	3.02e-13	4.25533	2.09e-05	#ERROR!
IL33	THAP9	0.140176	0.00655	0.755499	5.78e-07	4.25466	2.09e-05	#ERROR!
CAB39L	THAP9	0.311802	6.73e-10	0.823314	7.23e-09	4.25435	2.1e-05	#ERROR!
CAPS2	THAP9	0.479994	0	0.878094	4.06e-11	4.25398	2.1e-05	#ERROR!
CBR3	THAP9	0.023314	0.652688	0.700211	8.15e-06	4.25394	2.1e-05	0/+
RPAP3	THAP9	0.613882	0	0.915323	2.22e-13	4.25331	2.11e-05	#ERROR!
CD34	THAP9	0.178156	0.000528	0.771628	2.34e-07	4.25326	2.11e-05	#ERROR!
KLHDC8B	THAP9	0.179741	0.000469	0.772248	2.25e-07	4.25274	2.11e-05	#ERROR!
GTF2E1	THAP9	0.610131	0	0.914307	2.63e-13	4.25213	2.12e-05	#ERROR!
OSBPL6	THAP9	0.218837	1.91e-05	0.788123	8.56e-08	4.25207	2.12e-05	#ERROR!
MSRB3	THAP9	0.156816	0.002323	0.762463	3.94e-07	4.25171	2.12e-05	#ERROR!
CHD3	THAP9	0.302069	2.37e-09	0.819648	9.58e-09	4.25169	2.12e-05	#ERROR!
TAL1	THAP9	0.306282	1.38e-09	0.821082	8.59e-09	4.25039	2.13e-05	#ERROR!
SGIP1	THAP9	0.200744	9.07e-05	0.78068	1.36e-07	4.24994	2.14e-05	#ERROR!
NLRP1	THAP9	0.186967	0.000272	0.774927	1.93e-07	4.24868	2.15e-05	#ERROR!
ADARB2	THAP9	0.146028	0.004603	0.757495	5.19e-07	4.24808	2.16e-05	#ERROR!
CRYAB	THAP9	-0.09002	0.081697	0.63673	8.93e-05	4.2465	2.17e-05	0/+
C12orf4	THAP9	0.513118	0	0.887463	1.31e-11	4.24641	2.17e-05	#ERROR!
LOC389199	THAP9	0.108679	0.035399	0.740691	1.25e-06	4.2464	2.17e-05	#ERROR!
CCDC80	THAP9	0.041471	0.423278	0.708578	5.68e-06	4.24604	2.18e-05	0/+
DKFZP434A062	THAP9	0.067691	0.19089	0.721318	3.19e-06	4.24486	2.19e-05	0/+
CHROMR	THAP9	0.356687	1.08e-12	0.838343	2.12e-09	4.24432	2.19e-05	#ERROR!
HSPBAP1	THAP9	0.573387	0	0.904225	1.3e-12	4.24369	2.2e-05	#ERROR!
LIX1L	THAP9	0.22249	1.37e-05	0.788856	8.17e-08	4.24249	2.21e-05	#ERROR!
LYAR	THAP9	0.316034	3.83e-10	0.824015	6.84e-09	4.24168	2.22e-05	#ERROR!
DES	THAP9	-0.02837	0.583976	0.671554	2.58e-05	4.24158	2.22e-05	0/+
NREP	THAP9	0.247093	1.27e-06	0.798387	4.38e-08	4.24103	2.22e-05	#ERROR!
LNCOC1	THAP9	0.261841	2.69e-07	0.804004	2.98e-08	4.24061	2.23e-05	#ERROR!
DPYSL3	THAP9	0.124815	0.015588	0.747434	8.86e-07	4.24009	2.23e-05	#ERROR!
PIEZO1	THAP9	0.367312	2.02e-13	0.841642	1.59e-09	4.23918	2.24e-05	#ERROR!
KIAA1586	THAP9	0.475619	0	0.8761	5.11e-11	4.239	2.25e-05	#ERROR!
OBI1	THAP9	0.630185	0	0.919072	1.15e-13	4.23834	2.25e-05	#ERROR!
NIPAL4	THAP9	-0.01138	0.826078	0.680414	1.83e-05	4.23819	2.25e-05	0/+
MINDY2	THAP9	0.4795	0	0.877199	4.5e-11	4.2376	2.26e-05	#ERROR!
RSU1	THAP9	0.295741	5.25e-09	0.816349	1.23e-08	4.23647	2.27e-05	#ERROR!
CECR2	THAP9	0.161919	0.001656	0.763293	3.77e-07	4.23532	2.28e-05	#ERROR!
ASPA	THAP9	0.09388	0.069383	0.732771	1.85e-06	4.23446	2.29e-05	0/+
SLC25A21-AS1	THAP9	0.349816	3.1e-12	0.835397	2.72e-09	4.23434	2.29e-05	#ERROR!
GEMIN5	THAP9	0.543437	0	0.895528	4.52e-12	4.23253	2.31e-05	#ERROR!
ATL3	THAP9	0.48166	0	0.877566	4.31e-11	4.23147	2.32e-05	#ERROR!
ADAMTS16	THAP9	0.110778	0.031981	0.740306	1.28e-06	4.2314	2.32e-05	#ERROR!
SUGP2	THAP9	0.623634	0	0.917155	1.62e-13	4.23122	2.32e-05	#ERROR!
ASIC3	THAP9	0.29811	3.91e-09	0.816832	1.18e-08	4.23068	2.33e-05	#ERROR!
RASIP1	THAP9	0.154573	0.002688	0.7596	4.62e-07	4.22902	2.35e-05	#ERROR!
SNTB2	THAP9	0.434297	0	0.862903	2.13e-10	4.22888	2.35e-05	#ERROR!
CYP1B1	THAP9	0.055298	0.285487	0.71371	4.52e-06	4.22852	2.35e-05	0/+
SMG1P5	THAP9	0.4923	0	0.880595	3.03e-11	4.22836	2.35e-05	#ERROR!
EFHC1	THAP9	0.597546	0	0.910191	5.17e-13	4.22834	2.35e-05	#ERROR!
NRXN1	THAP9	0.036308	0.483309	0.704179	6.88e-06	4.22785	2.36e-05	0/+
COL11A1	THAP9	0.020577	0.691235	0.695878	9.78e-06	4.22516	2.39e-05	0/+
PPTC7	THAP9	0.496186	0	0.881598	2.69e-11	4.22506	2.39e-05	#ERROR!
G2E3	THAP9	0.637167	0	0.920455	8.99e-14	4.22476	2.39e-05	#ERROR!
DZANK1	THAP9	0.543957	0	0.895306	4.66e-12	4.22318	2.41e-05	#ERROR!
AGTR1	THAP9	0.06626	0.200458	0.718541	3.63e-06	4.22305	2.41e-05	0/+
HTR7P1	THAP9	0.384258	1.2e-14	0.846351	1.05e-09	4.22224	2.42e-05	#ERROR!
RBPMS	THAP9	0.131027	0.011091	0.748534	8.37e-07	4.22085	2.43e-05	#ERROR!
NTRK3	THAP9	0.075251	0.145829	0.722456	3.03e-06	4.21855	2.46e-05	0/+
TMEM252	THAP9	0.114814	0.026196	0.740972	1.23e-06	4.21823	2.46e-05	#ERROR!
TCF4	THAP9	0.299307	3.36e-09	0.816349	1.23e-08	4.21676	2.48e-05	#ERROR!
TMOD2	THAP9	0.430681	0	0.86107	2.56e-10	4.21536	2.49e-05	#ERROR!
C14orf132	THAP9	0.128878	0.012496	0.747067	9.04e-07	4.2151	2.5e-05	#ERROR!
RP9P	THAP9	0.383984	1.29e-14	0.84583	1.1e-09	4.21461	2.5e-05	#ERROR!
TENM3	THAP9	0.079873	0.12258	0.724239	2.79e-06	4.21396	2.51e-05	0/+
ADAMTS10	THAP9	0.155665	0.002504	0.758798	4.83e-07	4.21383	2.51e-05	#ERROR!
KDM2B	THAP9	0.488206	0	0.878666	3.8e-11	4.21256	2.52e-05	#ERROR!
LZTS1	THAP9	0.179031	0.000495	0.768695	2.77e-07	4.21239	2.53e-05	#ERROR!
FLYWCH1	THAP9	0.281551	2.91e-08	0.809458	2.03e-08	4.2121	2.53e-05	#ERROR!
FSIP1	THAP9	0.312314	6.29e-10	0.820776	8.79e-09	4.21206	2.53e-05	#ERROR!
KCNMA1-AS1	THAP9	0.140026	0.006609	0.751706	7.08e-07	4.21121	2.54e-05	#ERROR!
THAP6	THAP9	0.735402	0	0.944282	4.44e-16	4.21051	2.55e-05	#ERROR!
ABCA3	THAP9	0.153632	0.002856	0.757584	5.16e-07	4.20994	2.55e-05	#ERROR!
ALDH1A3	THAP9	0.154759	0.002656	0.758065	5.03e-07	4.20981	2.56e-05	#ERROR!
RFX3-AS1	THAP9	0.392573	2.89e-15	0.848413	8.67e-10	4.20975	2.56e-05	#ERROR!
DNAI3	THAP9	0.235157	4.16e-06	0.791415	6.93e-08	4.20946	2.56e-05	#ERROR!
LOC285593	THAP9	0.320213	2.18e-10	0.823437	7.16e-09	4.20921	2.56e-05	#ERROR!
AMY2B	THAP9	0.476354	0	0.874897	5.85e-11	4.20826	2.57e-05	#ERROR!
PRUNE2	THAP9	0.145901	0.004639	0.754032	6.26e-07	4.20805	2.58e-05	#ERROR!
CNTN1	THAP9	0.064104	0.215533	0.715909	4.09e-06	4.20666	2.59e-05	0/+
COPZ2	THAP9	0.00737	0.88688	0.68695	1.41e-05	4.20553	2.6e-05	0/+
GALNT17	THAP9	0.109136	0.03463	0.73717	1.49e-06	4.205	2.61e-05	#ERROR!
TRIM22	THAP9	0.103615	0.044942	0.734604	1.7e-06	4.20493	2.61e-05	#ERROR!
FANCL	THAP9	0.610447	0	0.91284	3.36e-13	4.20493	2.61e-05	#ERROR!
SGCA	THAP9	-0.0453	0.381688	0.657991	4.26e-05	4.20457	2.62e-05	0/+
PCDHB4	THAP9	0.25309	6.84e-07	0.798021	4.49e-08	4.20371	2.63e-05	#ERROR!
LINC01550	THAP9	0.080911	0.117779	0.723755	2.85e-06	4.20358	2.63e-05	0/+
SYNGR1	THAP9	0.11355	0.027903	0.739003	1.36e-06	4.20277	2.64e-05	#ERROR!
HNF4A-AS1	THAP9	0.372042	9.37e-14	-0.41649	0.017731	-4.20275	2.64e-05	#ERROR!
CASP8AP2	THAP9	0.733079	0	0.943548	6.66e-16	4.20204	2.65e-05	#ERROR!
FBXL17	THAP9	0.418044	0	0.856305	4.11e-10	4.2016	2.65e-05	#ERROR!
LMOD1	THAP9	0.033629	0.51619	0.700147	8.17e-06	4.2013	2.65e-05	0/+
ACTG1P17	THAP9	0.347548	4.37e-12	0.8326	3.43e-09	4.20106	2.66e-05	#ERROR!
SMN1	THAP9	0.508726	0	0.884245	1.95e-11	4.20104	2.66e-05	#ERROR!
LAMA2	THAP9	0.188234	0.000247	0.771628	2.34e-07	4.20073	2.66e-05	#ERROR!
SERPING1	THAP9	-0.0067	0.897096	0.678886	1.94e-05	4.20028	2.67e-05	0/+
SESN3	THAP9	0.346287	5.27e-12	0.832111	3.58e-09	4.20028	2.67e-05	#ERROR!
ACSM5	THAP9	-0.01163	0.822366	0.676206	2.16e-05	4.20017	2.67e-05	0/+
SHE	THAP9	0.213312	3.11e-05	0.781891	1.26e-07	4.19945	2.68e-05	#ERROR!
JPH2	THAP9	0.035489	0.493239	0.70088	7.92e-06	4.19917	2.68e-05	0/+
LGI1	THAP9	0.058647	0.257266	0.712452	4.78e-06	4.1987	2.68e-05	0/+
PLP1	THAP9	-0.01972	0.703475	0.671616	2.57e-05	4.19856	2.69e-05	0/+
ACTA2	THAP9	0.042155	0.415661	0.704179	6.88e-06	4.19835	2.69e-05	0/+
C1orf210	THAP9	0.329181	6.3e-11	-0.45528	0.008836	-4.19778	2.7e-05	#ERROR!
GTDC1	THAP9	0.532949	0	0.891129	8.14e-12	4.19717	2.7e-05	#ERROR!
FAM66B	THAP9	0.135753	0.008482	0.74851	8.38e-07	4.19634	2.71e-05	#ERROR!
PCARE	THAP9	0.004096	0.936988	0.684226	1.57e-05	4.19613	2.72e-05	0/+
TGM5	THAP9	0.035703	0.490642	0.700678	7.99e-06	4.1961	2.72e-05	0/+
CDH24	THAP9	0.364098	3.38e-13	0.837977	2.19e-09	4.19521	2.73e-05	#ERROR!
MAML2	THAP9	0.383533	1.38e-14	0.844575	1.23e-09	4.19514	2.73e-05	#ERROR!
NUPR1	THAP9	-0.06677	0.197006	0.644428	6.87e-05	4.19442	2.74e-05	0/+
RSPO3	THAP9	0.003958	0.93911	0.683897	1.59e-05	4.19371	2.74e-05	0/+
KLHDC1	THAP9	0.38596	9.1e-15	0.845308	1.15e-09	4.1937	2.74e-05	#ERROR!
RHPN2	THAP9	0.349038	3.49e-12	-0.43658	0.012482	-4.19326	2.75e-05	#ERROR!
SNX18	THAP9	0.262722	2.45e-07	0.800953	3.68e-08	4.19268	2.76e-05	#ERROR!
MBNL1	THAP9	0.477892	0	0.874633	6.03e-11	4.19257	2.76e-05	#ERROR!
C12orf76	THAP9	0.574881	0	0.902759	1.62e-12	4.19225	2.76e-05	#ERROR!
SMAD5	THAP9	0.681355	0	0.930718	1.2e-14	4.19198	2.77e-05	#ERROR!
EIF4E3	THAP9	0.326055	9.76e-11	0.824413	6.63e-09	4.19166	2.77e-05	#ERROR!
TMEM91	THAP9	0.222773	1.33e-05	0.785112	1.03e-07	4.19143	2.77e-05	#ERROR!
SETMAR	THAP9	0.536317	0	0.891862	7.4e-12	4.19141	2.77e-05	#ERROR!
LOC101927751	THAP9	0.348193	3.96e-12	0.832233	3.54e-09	4.19135	2.77e-05	#ERROR!
PRCP	THAP9	0.379834	2.58e-14	0.843109	1.4e-09	4.1913	2.77e-05	#ERROR!
KCNJ2	THAP9	0.255529	5.3e-07	0.798021	4.49e-08	4.19058	2.78e-05	#ERROR!
FBLN2	THAP9	0.046616	0.368018	0.705645	6.45e-06	4.19052	2.78e-05	0/+
AKR1E2	THAP9	0.192072	0.000183	0.77239	2.24e-07	4.19017	2.79e-05	#ERROR!
CYP7B1	THAP9	0.189238	0.000228	0.771148	2.4e-07	4.18952	2.8e-05	#ERROR!
TRIM10	THAP9	0.330112	5.53e-11	-0.45308	0.009212	-4.18907	2.8e-05	#ERROR!
ATXN3	THAP9	0.627393	0	0.916789	1.72e-13	4.18851	2.81e-05	#ERROR!
FCF1	THAP9	0.473716	0	0.873167	7.11e-11	4.18851	2.81e-05	#ERROR!
MMRN1	THAP9	0.129157	0.012306	0.744821	1.01e-06	4.18816	2.81e-05	#ERROR!
PCDHGA9	THAP9	0.229975	6.83e-06	0.787718	8.78e-08	4.18759	2.82e-05	#ERROR!
COL16A1	THAP9	0.188158	0.000248	0.770528	2.49e-07	4.18746	2.82e-05	#ERROR!
TMEM255A	THAP9	0.031656	0.541113	0.697709	9.06e-06	4.18723	2.82e-05	0/+
LOC101929494	THAP9	0.039886	0.441231	0.701835	7.6e-06	4.18646	2.83e-05	0/+
GAS6	THAP9	0.165191	0.001326	0.76063	4.37e-07	4.18641	2.83e-05	#ERROR!
LINC00652	THAP9	0.310776	7.7e-10	0.818471	1.05e-08	4.18526	2.85e-05	#ERROR!
TNS2	THAP9	0.197366	0.00012	0.774194	2.01e-07	4.18505	2.85e-05	#ERROR!
JHY	THAP9	0.180525	0.000443	0.766819	3.09e-07	4.1816	2.89e-05	#ERROR!
MOBP	THAP9	0.118018	0.022268	0.739119	1.36e-06	4.18124	2.9e-05	#ERROR!
TMEM64	THAP9	0.458282	0	0.868035	1.24e-10	4.18101	2.9e-05	#ERROR!
LOC102724050	THAP9	0.031565	0.542282	0.696997	9.33e-06	4.18072	2.91e-05	0/+
RGS10	THAP9	-0.0039	0.939986	0.678152	2e-05	4.17933	2.92e-05	0/+
INHBA	THAP9	0.040891	0.4298	0.701613	7.68e-06	4.17918	2.93e-05	0/+
FSTL1	THAP9	0.208238	4.83e-05	0.778226	1.58e-07	4.17903	2.93e-05	#ERROR!
HLA-G	THAP9	0.175464	0.000642	-0.573	0.000609	-4.17777	2.94e-05	#ERROR!
RGS22	THAP9	0.134238	0.009252	0.746173	9.46e-07	4.17744	2.95e-05	#ERROR!
ATF7IP	THAP9	0.602728	0	0.909824	5.49e-13	4.17679	2.96e-05	#ERROR!
RFTN2	THAP9	0.353459	1.78e-12	0.833181	3.27e-09	4.17666	2.96e-05	#ERROR!
HEG1	THAP9	0.246951	1.29e-06	0.793622	6e-08	4.17626	2.96e-05	#ERROR!
SMO	THAP9	0.209703	4.26e-05	0.778592	1.55e-07	4.176	2.97e-05	#ERROR!
ARMC10	THAP9	0.401018	6.66e-16	0.84934	7.96e-10	4.17597	2.97e-05	#ERROR!
FNBP1	THAP9	0.2314	5.96e-06	0.78739	8.97e-08	4.17566	2.97e-05	#ERROR!
SLC22A3	THAP9	0.216656	2.32e-05	0.781413	1.3e-07	4.1756	2.97e-05	#ERROR!
MIR1915HG	THAP9	0.193959	0.000157	0.77201	2.29e-07	4.17556	2.97e-05	#ERROR!
NUDT10	THAP9	0.071613	0.166379	0.716473	3.99e-06	4.17448	2.99e-05	0/+
MXRA8	THAP9	0.026311	0.611532	0.693548	1.08e-05	4.17358	3e-05	0/+
HNF1A-AS1	THAP9	0.399922	8.88e-16	-0.38383	0.030102	-4.17186	3.02e-05	#ERROR!
FAM234B	THAP9	0.341149	1.13e-11	0.828446	4.82e-09	4.17018	3.04e-05	#ERROR!
KLF17	THAP9	0.055604	0.282825	0.707962	5.83e-06	4.16845	3.07e-05	0/+
C8orf58	THAP9	0.314749	4.55e-10	0.818807	1.02e-08	4.1682	3.07e-05	#ERROR!
FAM71C	THAP9	0.091067	0.078191	0.725243	2.66e-06	4.16781	3.08e-05	0/+
CSE1L	THAP9	0.565449	0	0.899194	2.71e-12	4.16723	3.08e-05	#ERROR!
PNPT1	THAP9	0.603941	0	0.909824	5.49e-13	4.16718	3.08e-05	#ERROR!
L3MBTL4	THAP9	0.143847	0.005258	0.749588	7.92e-07	4.16712	3.08e-05	#ERROR!
ANKRD34A	THAP9	0.186843	0.000275	0.768244	2.84e-07	4.16612	3.1e-05	#ERROR!
ERCC4	THAP9	0.535064	0	0.890396	8.96e-12	4.16438	3.12e-05	#ERROR!
LRRC4B	THAP9	0.150248	0.003541	0.752199	6.9e-07	4.16432	3.12e-05	#ERROR!
PHC1	THAP9	0.404114	4.44e-16	0.849601	7.77e-10	4.16208	3.15e-05	#ERROR!
ANKRD13B	THAP9	0.368755	1.6e-13	0.83761	2.26e-09	4.16191	3.16e-05	#ERROR!
FKTN	THAP9	0.648811	0	0.921554	7.35e-14	4.16126	3.16e-05	#ERROR!
CXCL12	THAP9	0.114323	0.026847	0.735337	1.64e-06	4.15837	3.21e-05	#ERROR!
ARHGEF25	THAP9	0.097214	0.060011	0.727273	2.42e-06	4.1582	3.21e-05	0/+
CTDSPL2	THAP9	0.721962	0	0.939883	1.55e-15	4.15779	3.21e-05	#ERROR!
EIF2B1	THAP9	0.508721	0	0.882331	2.46e-11	4.1572	3.22e-05	#ERROR!
THBD	THAP9	0.151796	0.003211	0.752199	6.9e-07	4.15634	3.23e-05	#ERROR!
TIMM21	THAP9	0.546169	0	0.893227	6.17e-12	4.15502	3.25e-05	#ERROR!
TMTC2	THAP9	0.395798	1.78e-15	0.846408	1.04e-09	4.15467	3.26e-05	#ERROR!
PLAAT5	THAP9	0.062816	0.224913	0.710174	5.29e-06	4.1544	3.26e-05	0/+
LINC00933	THAP9	0.169803	0.000963	0.759923	4.54e-07	4.15405	3.27e-05	#ERROR!
PTGS1	THAP9	0.106575	0.039131	0.731305	1.99e-06	4.15394	3.27e-05	#ERROR!
TDRP	THAP9	0.243025	1.92e-06	0.790395	7.4e-08	4.15369	3.27e-05	#ERROR!
PRICKLE2	THAP9	0.21307	3.18e-05	0.778226	1.58e-07	4.15356	3.27e-05	#ERROR!
SLFN12	THAP9	0.333244	3.55e-11	0.824565	6.55e-09	4.1534	3.28e-05	#ERROR!
SSH1	THAP9	0.418097	0	0.853739	5.26e-10	4.15321	3.28e-05	#ERROR!
LRRC37A6P	THAP9	0.315663	4.03e-10	0.818049	1.08e-08	4.15153	3.3e-05	#ERROR!
KIAA1143	THAP9	0.607282	0	0.910191	5.17e-13	4.15134	3.31e-05	#ERROR!
LINC00589	THAP9	0.19398	0.000157	-0.55621	0.000948	-4.1502	3.32e-05	#ERROR!
ATAD1	THAP9	0.586082	0	0.904326	1.28e-12	4.15012	3.32e-05	#ERROR!
A2ML1	THAP9	0.007508	0.884789	0.681168	1.78e-05	4.15009	3.32e-05	0/+
PALMD	THAP9	0.191596	0.00019	0.768695	2.77e-07	4.14684	3.37e-05	#ERROR!
GNE	THAP9	0.232314	5.47e-06	0.785557	1.01e-07	4.14659	3.37e-05	#ERROR!
GOLGA8R	THAP9	0.337619	1.89e-11	0.825701	5.99e-09	4.14651	3.38e-05	#ERROR!
FGD1	THAP9	0.351517	2.39e-12	0.830645	4.03e-09	4.14636	3.38e-05	#ERROR!
RHPN1-AS1	THAP9	0.273721	7.2e-08	0.801873	3.45e-08	4.14593	3.38e-05	#ERROR!
NRAD1	THAP9	0.125022	0.015416	0.739008	1.36e-06	4.14419	3.41e-05	#ERROR!
STK38L	THAP9	0.473614	0	0.870968	9.06e-11	4.1429	3.43e-05	#ERROR!
LOC100996842	THAP9	0.203381	7.28e-05	0.773348	2.11e-07	4.14286	3.43e-05	#ERROR!
LOC441239	THAP9	0.257747	4.19e-07	0.795335	5.36e-08	4.14158	3.45e-05	#ERROR!
MTPAP	THAP9	0.61394	0	0.911657	4.08e-13	4.14126	3.45e-05	#ERROR!
MFAP3L	THAP9	0.336056	2.37e-11	0.82478	6.44e-09	4.14084	3.46e-05	#ERROR!
PTPRZ1	THAP9	0.102038	0.048323	0.727889	2.35e-06	4.14025	3.47e-05	#ERROR!
ECD	THAP9	0.611761	0	0.911007	4.54e-13	4.13952	3.48e-05	#ERROR!
S1PR1	THAP9	0.160204	0.001858	0.754399	6.13e-07	4.13854	3.5e-05	#ERROR!
CFH	THAP9	0.194069	0.000156	0.769062	2.71e-07	4.13842	3.5e-05	#ERROR!
EDRF1	THAP9	0.695752	0	0.932918	7.55e-15	4.13816	3.5e-05	#ERROR!
ARHGEF15	THAP9	0.166964	0.001173	0.757331	5.23e-07	4.13802	3.5e-05	#ERROR!
PM20D2	THAP9	0.5226	0	0.88563	1.64e-11	4.138	3.5e-05	#ERROR!
MEGF6	THAP9	0.250141	9.3e-07	0.792045	6.65e-08	4.13774	3.51e-05	#ERROR!
BBS5	THAP9	0.390001	4.44e-15	0.843475	1.35e-09	4.13756	3.51e-05	#ERROR!
MBNL2	THAP9	0.451189	0	0.863636	1.97e-10	4.13753	3.51e-05	#ERROR!
CFAP45	THAP9	0.272995	7.82e-08	0.800954	3.68e-08	4.13694	3.52e-05	#ERROR!
RBFADN	THAP9	0.518027	0	0.884221	1.95e-11	4.13685	3.52e-05	#ERROR!
MPHOSPH9	THAP9	0.626353	0	0.914857	2.4e-13	4.13677	3.52e-05	#ERROR!
OR2L13	THAP9	0.006745	0.896417	0.679332	1.91e-05	4.13672	3.52e-05	0/+
MSANTD3	THAP9	0.38379	1.33e-14	0.841276	1.64e-09	4.13621	3.53e-05	#ERROR!
PLPP7	THAP9	0.047898	0.354975	0.700706	7.98e-06	4.13482	3.55e-05	0/+
GRK4	THAP9	0.399145	8.88e-16	0.846408	1.04e-09	4.13464	3.56e-05	#ERROR!
CLEC2B	THAP9	0.068776	0.183855	0.711144	5.07e-06	4.1341	3.56e-05	0/+
MCC	THAP9	0.229299	7.28e-06	0.783358	1.15e-07	4.13382	3.57e-05	#ERROR!
LINC01697	THAP9	-0.00164	0.974726	0.674429	2.31e-05	4.13338	3.57e-05	0/+
PSMD6	THAP9	0.552125	0	0.894062	5.52e-12	4.13294	3.58e-05	#ERROR!
SLC16A14	THAP9	0.332435	3.98e-11	0.822947	7.44e-09	4.13264	3.59e-05	#ERROR!
CPSF2	THAP9	0.669069	0	0.925953	3.2e-14	4.13196	3.6e-05	#ERROR!
CCDC122	THAP9	0.43737	0	0.858845	3.2e-10	4.1308	3.62e-05	#ERROR!
PTPN4	THAP9	0.687813	0	0.930718	1.2e-14	4.13074	3.62e-05	#ERROR!
MTAP	THAP9	0.50798	0	0.880865	2.93e-11	4.12908	3.64e-05	#ERROR!
CAVIN1	THAP9	0.076454	0.139475	0.714443	4.37e-06	4.12901	3.64e-05	0/+
LRRN4CL	THAP9	0.03386	0.51331	0.692815	1.11e-05	4.1284	3.65e-05	0/+
CCSAP	THAP9	0.603771	0	0.908441	6.83e-13	4.12836	3.65e-05	#ERROR!
SLC39A6	THAP9	0.47473	0	0.870601	9.43e-11	4.12801	3.66e-05	#ERROR!
AMD1P1	THAP9	0.117608	0.02274	0.734074	1.74e-06	4.12777	3.66e-05	#ERROR!
TAMM41	THAP9	0.516103	0	0.883226	2.21e-11	4.12721	3.67e-05	#ERROR!
SNORA80A	THAP9	-0.03268	0.528159	-0.69204	1.15e-05	-4.1269	3.68e-05	0/-
FASTKD2	THAP9	0.666822	0	0.92522	3.69e-14	4.12662	3.68e-05	#ERROR!
NT5C3B	THAP9	0.241569	2.22e-06	0.787757	8.76e-08	4.12626	3.69e-05	#ERROR!
FOXC2	THAP9	0.096237	0.062641	0.723689	2.86e-06	4.12505	3.71e-05	0/+
KCTD12	THAP9	0.254699	5.78e-07	0.792889	6.3e-08	4.12465	3.71e-05	#ERROR!
DZIP1	THAP9	0.256815	4.62e-07	0.793694	5.98e-08	4.1242	3.72e-05	#ERROR!
SGTB	THAP9	0.434058	0	0.857405	3.69e-10	4.12387	3.73e-05	#ERROR!
SLC16A1-AS1	THAP9	0.327586	7.88e-11	0.820607	8.9e-09	4.12374	3.73e-05	#ERROR!
PPFIA2	THAP9	0.144417	0.005079	0.745965	9.57e-07	4.12278	3.74e-05	#ERROR!
NSUN5P1	THAP9	0.517497	0	0.883431	2.15e-11	4.12231	3.75e-05	#ERROR!
LRRC37B	THAP9	0.613964	0	0.911007	4.54e-13	4.12175	3.76e-05	#ERROR!
RBFA	THAP9	0.388437	5.77e-15	0.842009	1.54e-09	4.12135	3.77e-05	#ERROR!
GABBR1	THAP9	0.352874	1.95e-12	0.829545	4.41e-09	4.12073	3.78e-05	#ERROR!
ANKRA2	THAP9	0.556361	0	0.894795	5e-12	4.1206	3.78e-05	#ERROR!
MAP6D1	THAP9	0.338874	1.57e-11	0.8245	6.59e-09	4.12042	3.78e-05	#ERROR!
AR	THAP9	0.140272	0.006513	0.743768	1.07e-06	4.11924	3.8e-05	#ERROR!
KCND2	THAP9	0.072039	0.163866	0.711181	5.06e-06	4.11796	3.82e-05	0/+
CCP110	THAP9	0.649625	0	0.920455	8.99e-14	4.11766	3.83e-05	#ERROR!
MRE11	THAP9	0.673796	0	0.926771	2.71e-14	4.11765	3.83e-05	#ERROR!
MITF	THAP9	0.232717	5.26e-06	0.783358	1.15e-07	4.11563	3.86e-05	#ERROR!
TMX3	THAP9	0.618491	0	0.912023	3.85e-13	4.11525	3.87e-05	#ERROR!
CEP68	THAP9	0.456028	0	0.864003	1.9e-10	4.11411	3.89e-05	#ERROR!
C3orf14	THAP9	0.163471	0.001491	0.753735	6.36e-07	4.11389	3.89e-05	#ERROR!
DCAF17	THAP9	0.733942	0	0.941802	8.88e-16	4.11361	3.9e-05	#ERROR!
CPLANE1	THAP9	0.542313	0	0.890396	8.96e-12	4.11294	3.91e-05	#ERROR!
TEX10	THAP9	0.655402	0	0.921822	6.99e-14	4.11245	3.91e-05	#ERROR!
CCDC184	THAP9	-0.05147	0.320194	0.643813	7.02e-05	4.11177	3.93e-05	0/+
NDST1-AS1	THAP9	0.192991	0.00017	0.76631	3.18e-07	4.1103	3.95e-05	#ERROR!
COQ3	THAP9	0.45865	0	0.864632	1.78e-10	4.10993	3.96e-05	#ERROR!
NR2F1-AS1	THAP9	0.155198	0.002581	0.749633	7.9e-07	4.10915	3.97e-05	#ERROR!
FAIM	THAP9	0.472664	0	0.869031	1.12e-10	4.10893	3.97e-05	#ERROR!
LOC389602	THAP9	0.158894	0.002026	-0.57525	0.000573	-4.10882	3.98e-05	#ERROR!
TGFB1I1	THAP9	0.034292	0.507942	0.690982	1.2e-05	4.10851	3.98e-05	0/+
FOXP2	THAP9	0.117054	0.023392	0.732038	1.92e-06	4.10843	3.98e-05	#ERROR!
EPB41L4B	THAP9	0.403299	4.44e-16	-0.36913	0.037605	-4.10586	4.03e-05	#ERROR!
TASOR	THAP9	0.694771	0	0.931818	9.77e-15	4.10534	4.04e-05	#ERROR!
COL8A2	THAP9	0.074293	0.15104	0.711026	5.1e-06	4.10496	4.04e-05	0/+
FBXL3	THAP9	0.619793	0	0.912023	3.85e-13	4.10462	4.05e-05	#ERROR!
SRCIN1	THAP9	0.34349	8e-12	0.825147	6.26e-09	4.10429	4.06e-05	#ERROR!
SYPL1	THAP9	0.418461	0	0.851173	6.71e-10	4.10369	4.07e-05	#ERROR!
CLPB	THAP9	0.484592	0	0.872514	7.64e-11	4.10356	4.07e-05	#ERROR!
MAS1L	THAP9	0.008237	0.873679	0.676553	2.13e-05	4.10329	4.07e-05	0/+
MORC3	THAP9	0.626847	0	0.913856	2.84e-13	4.10194	4.1e-05	#ERROR!
SUGT1P4-STRA6LP	THAP9	0.38696	7.55e-15	0.840367	1.78e-09	4.10183	4.1e-05	#ERROR!
ADH1B	THAP9	0.050521	0.329215	0.69868	8.7e-06	4.10158	4.1e-05	0/+
LCN6	THAP9	0.022852	0.659132	0.684143	1.58e-05	4.10084	4.12e-05	0/+
STING1	THAP9	0.024121	0.64149	0.684751	1.54e-05	4.1002	4.13e-05	0/+
IRAG1	THAP9	0.15522	0.002578	0.748786	8.26e-07	4.0993	4.14e-05	#ERROR!
MEIS1-AS2	THAP9	0.160488	0.001823	0.751106	7.31e-07	4.0988	4.15e-05	#ERROR!
LINC01342	THAP9	0.331642	4.45e-11	-0.43717	0.012352	-4.09775	4.17e-05	#ERROR!
CEP126	THAP9	0.406611	2.22e-16	0.846852	1e-09	4.09765	4.17e-05	#ERROR!
IGFBP5	THAP9	0.148553	0.003938	0.745601	9.75e-07	4.09736	4.18e-05	#ERROR!
MIF4GD	THAP9	0.210711	3.9e-05	0.772727	2.19e-07	4.09651	4.19e-05	#ERROR!
LPAL2	THAP9	0.335749	2.48e-11	0.821792	8.13e-09	4.09588	4.21e-05	#ERROR!
TRIM65	THAP9	0.421072	0	0.851618	6.43e-10	4.09586	4.21e-05	#ERROR!
LRRC37A3	THAP9	0.440807	0	0.858138	3.43e-10	4.0958	4.21e-05	#ERROR!
IDS	THAP9	0.402396	4.44e-16	0.845308	1.15e-09	4.09566	4.21e-05	#ERROR!
MEOX2	THAP9	0.043291	0.403199	0.694282	1.05e-05	4.09505	4.22e-05	0/+
MPP3	THAP9	0.394971	1.78e-15	0.842713	1.45e-09	4.09469	4.23e-05	#ERROR!
MECR	THAP9	0.348434	3.82e-12	0.826322	5.71e-09	4.0946	4.23e-05	#ERROR!
SLIT2	THAP9	0.127648	0.01337	0.735704	1.61e-06	4.09427	4.24e-05	#ERROR!
SHANK1	THAP9	0.119314	0.02083	0.731793	1.94e-06	4.09422	4.24e-05	#ERROR!
LCAT	THAP9	0.388933	5.33e-15	0.840543	1.75e-09	4.09314	4.26e-05	#ERROR!
SNCG	THAP9	-0.07166	0.166113	0.629399	0.000114	4.09175	4.28e-05	0/+
MMP17	THAP9	0.064141	0.215265	0.70461	6.75e-06	4.09158	4.28e-05	0/+
IHO1	THAP9	0.233485	4.89e-06	0.781772	1.27e-07	4.09093	4.3e-05	#ERROR!
MIR4453HG	THAP9	0.642314	0	0.917675	1.48e-13	4.09071	4.3e-05	#ERROR!
GM2A	THAP9	0.114565	0.026525	0.729106	2.21e-06	4.08945	4.32e-05	#ERROR!
CDKN1B	THAP9	0.414299	0	0.848974	8.23e-10	4.0891	4.33e-05	#ERROR!
C19orf71	THAP9	0.296218	4.95e-09	0.806416	2.52e-08	4.08734	4.36e-05	#ERROR!
MCTP1	THAP9	0.310793	7.68e-10	0.81195	1.7e-08	4.08722	4.37e-05	#ERROR!
MPDZ	THAP9	0.248074	1.15e-06	0.78739	8.97e-08	4.08654	4.38e-05	#ERROR!
NBPF15	THAP9	0.531363	0	0.885997	1.57e-11	4.08545	4.4e-05	#ERROR!
MIPOL1	THAP9	0.480344	0	0.870314	9.73e-11	4.08541	4.4e-05	#ERROR!
HACD4	THAP9	0.254162	6.12e-07	0.789589	7.79e-08	4.08309	4.44e-05	#ERROR!
SMIM29	THAP9	0.085619	0.097821	0.714443	4.37e-06	4.08253	4.45e-05	0/+
PRKAA2	THAP9	0.190067	0.000214	0.762717	3.89e-07	4.08203	4.46e-05	#ERROR!
MAPK11	THAP9	0.095286	0.065295	0.719091	3.54e-06	4.08159	4.47e-05	0/+
PDE2A	THAP9	0.19062	0.000205	0.76283	3.86e-07	4.0805	4.49e-05	#ERROR!
PHYHD1	THAP9	-0.02282	0.659632	0.656768	4.45e-05	4.08031	4.5e-05	0/+
GIT2	THAP9	0.429994	0	0.853739	5.26e-10	4.08013	4.5e-05	#ERROR!
RPL7AP45	THAP9	0.27034	1.06e-07	0.795818	5.2e-08	4.08	4.5e-05	#ERROR!
PPM1F	THAP9	0.339757	1.38e-11	0.822214	7.87e-09	4.07963	4.51e-05	#ERROR!
EFCAB6	THAP9	0.367229	2.05e-13	0.832111	3.58e-09	4.07938	4.52e-05	#ERROR!
FAM78B	THAP9	0.310889	7.59e-10	0.81144	1.76e-08	4.07916	4.52e-05	#ERROR!
MTMR6	THAP9	0.551766	0	0.891761	7.5e-12	4.07836	4.54e-05	#ERROR!
MED21	THAP9	0.486998	0	0.872067	8.03e-11	4.07829	4.54e-05	#ERROR!
CLMP	THAP9	0.091719	0.076073	0.717009	3.89e-06	4.07806	4.54e-05	0/+
PPP1R3F	THAP9	0.192026	0.000183	0.763223	3.78e-07	4.07789	4.54e-05	#ERROR!
JRKL	THAP9	0.643292	0	0.917522	1.52e-13	4.07743	4.55e-05	#ERROR!
DMD	THAP9	0.271802	8.95e-08	0.796188	5.07e-08	4.07715	4.56e-05	#ERROR!
DCLRE1B	THAP9	0.445032	0	0.858504	3.31e-10	4.07633	4.58e-05	#ERROR!
CLGN	THAP9	0.316563	3.57e-10	0.813382	1.53e-08	4.07623	4.58e-05	#ERROR!
ABCC1	THAP9	0.389697	4.88e-15	0.839809	1.87e-09	4.07604	4.58e-05	#ERROR!
COPS6	THAP9	0.204404	6.69e-05	0.768328	2.83e-07	4.07517	4.6e-05	#ERROR!
C8orf37	THAP9	0.573537	0	0.897974	3.22e-12	4.07502	4.6e-05	#ERROR!
PI15	THAP9	0.20734	5.22e-05	0.769569	2.63e-07	4.07502	4.6e-05	#ERROR!
MSN	THAP9	0.175185	0.000656	0.755499	5.78e-07	4.07377	4.63e-05	#ERROR!
GARRE1	THAP9	0.536736	0	0.887097	1.37e-11	4.07347	4.63e-05	#ERROR!
KCNT1	THAP9	0.282342	2.65e-08	0.800037	3.92e-08	4.07305	4.64e-05	#ERROR!
ADAMTS9-AS2	THAP9	0.108033	0.036511	0.724407	2.77e-06	4.07259	4.65e-05	#ERROR!
PDE4DIPP6	THAP9	0.465631	0	0.864949	1.72e-10	4.07155	4.67e-05	#ERROR!
ITIH2	THAP9	0.190129	0.000213	0.761855	4.08e-07	4.07134	4.67e-05	#ERROR!
P3H1	THAP9	0.328407	7.03e-11	0.817449	1.13e-08	4.07077	4.69e-05	#ERROR!
SYDE1	THAP9	0.076193	0.140835	0.708578	5.68e-06	4.07049	4.69e-05	0/+
NEXN	THAP9	0.122982	0.017189	0.731305	1.99e-06	4.07018	4.7e-05	#ERROR!
DMGDH	THAP9	0.272005	8.75e-08	0.795746	5.22e-08	4.06997	4.7e-05	#ERROR!
PEX1	THAP9	0.623809	0	0.911924	3.91e-13	4.06865	4.73e-05	#ERROR!
LINC00173	THAP9	0.088064	0.088576	0.714273	4.41e-06	4.06838	4.73e-05	0/+
SCARF2	THAP9	0.060689	0.241035	0.700513	8.05e-06	4.06828	4.74e-05	0/+
IARS1	THAP9	0.592772	0	0.903226	1.51e-12	4.06824	4.74e-05	#ERROR!
RBM43	THAP9	0.419281	0	0.849496	7.84e-10	4.06816	4.74e-05	#ERROR!
CDK17	THAP9	0.525325	0	0.883431	2.15e-11	4.06815	4.74e-05	#ERROR!
CDC5L	THAP9	0.63903	0	0.916056	1.95e-13	4.06758	4.75e-05	#ERROR!
DNAAF5	THAP9	0.485138	0	0.870968	9.06e-11	4.06752	4.75e-05	#ERROR!
GALNT18	THAP9	0.185615	0.000302	0.759531	4.64e-07	4.06712	4.76e-05	#ERROR!
RPL18AP7	THAP9	0.295616	5.33e-09	0.80468	2.85e-08	4.06575	4.79e-05	#ERROR!
SH3BGR	THAP9	0.257402	4.34e-07	0.789589	7.79e-08	4.06563	4.79e-05	#ERROR!
HEATR6	THAP9	0.621888	0	0.91129	4.33e-13	4.06557	4.79e-05	#ERROR!
ATP6AP1L	THAP9	0.47878	0	0.868848	1.14e-10	4.06534	4.8e-05	#ERROR!
STARD4-AS1	THAP9	0.475592	0	0.867779	1.28e-10	4.06426	4.82e-05	#ERROR!
SLC25A12	THAP9	0.416258	0	0.84824	8.81e-10	4.06398	4.82e-05	#ERROR!
IL17D	THAP9	0.167429	0.001136	0.7511	7.31e-07	4.06279	4.85e-05	#ERROR!
C18orf54	THAP9	0.601836	0	0.905591	1.06e-12	4.06271	4.85e-05	#ERROR!
CORIN	THAP9	0.205821	5.93e-05	0.767862	2.91e-07	4.06199	4.87e-05	#ERROR!
CLEC2L	THAP9	0.122332	0.017791	0.730226	2.1e-06	4.06184	4.87e-05	#ERROR!
DRD1	THAP9	0.149967	0.003604	0.743077	1.11e-06	4.06156	4.87e-05	#ERROR!
FERMT2	THAP9	0.209577	4.31e-05	0.769428	2.66e-07	4.0615	4.88e-05	#ERROR!
ACTRT3	THAP9	0.268178	1.34e-07	0.793584	6.02e-08	4.06121	4.88e-05	#ERROR!
DYNC2H1	THAP9	0.444632	0	0.857562	3.63e-10	4.06085	4.89e-05	#ERROR!
MN1	THAP9	0.190376	0.000209	0.761067	4.26e-07	4.0606	4.89e-05	#ERROR!
CCDC102A	THAP9	0.186102	0.000291	0.759164	4.74e-07	4.06022	4.9e-05	#ERROR!
PPOX	THAP9	0.529183	0	0.884245	1.95e-11	4.05998	4.91e-05	#ERROR!
APLF	THAP9	0.45217	0	0.859971	2.86e-10	4.05954	4.92e-05	#ERROR!
PRPF39	THAP9	0.691005	0	0.929619	1.51e-14	4.05899	4.93e-05	#ERROR!
PHAX	THAP9	0.507526	0	0.877566	4.31e-11	4.05894	4.93e-05	#ERROR!
LDB1	THAP9	0.397861	1.11e-15	0.841642	1.59e-09	4.05886	4.93e-05	#ERROR!
EFNA5	THAP9	0.13772	0.007568	0.73717	1.49e-06	4.05876	4.93e-05	#ERROR!
KCNMB1	THAP9	-0.01637	0.751959	0.657991	4.26e-05	4.05869	4.93e-05	0/+
CEP41	THAP9	0.341438	1.08e-11	0.821481	8.33e-09	4.05867	4.94e-05	#ERROR!
GASK1A	THAP9	0.119607	0.020516	0.728622	2.26e-06	4.0585	4.94e-05	#ERROR!
CCNT2	THAP9	0.743065	0	0.942815	8.88e-16	4.05806	4.95e-05	#ERROR!
HES4	THAP9	0.049924	0.334975	0.693915	1.06e-05	4.058	4.95e-05	0/+
MYH11	THAP9	0.033316	0.520102	0.685117	1.52e-05	4.05732	4.96e-05	0/+
SH3RF3	THAP9	0.210403	4.01e-05	0.769428	2.66e-07	4.05714	4.97e-05	#ERROR!
POLH	THAP9	0.513767	0	0.879399	3.49e-11	4.05685	4.97e-05	#ERROR!
KIAA0408	THAP9	0.119381	0.020758	0.728225	2.31e-06	4.05539	5.01e-05	#ERROR!
POGLUT3	THAP9	0.475507	0	0.867302	1.34e-10	4.05509	5.01e-05	#ERROR!
MARVELD1	THAP9	0.204917	6.4e-05	0.766862	3.08e-07	4.05449	5.02e-05	#ERROR!
PART1	THAP9	0.024502	0.636239	0.679985	1.86e-05	4.05335	5.05e-05	0/+
ADCY3	THAP9	0.338477	1.67e-11	0.820015	9.32e-09	4.0529	5.06e-05	#ERROR!
LHCGR	THAP9	0.074676	0.148941	0.706008	6.35e-06	4.05227	5.07e-05	0/+
FN1	THAP9	0.163939	0.001444	0.748534	8.37e-07	4.05134	5.09e-05	#ERROR!
HTATIP2	THAP9	0.388013	6.22e-15	-0.37537	0.034258	-4.05101	5.1e-05	#ERROR!
LGI4	THAP9	0.061378	0.235732	0.698937	8.6e-06	4.04924	5.14e-05	0/+
THBS3	THAP9	0.3735	7.37e-14	0.832478	3.47e-09	4.04877	5.15e-05	#ERROR!
IGIP	THAP9	0.4733	0	0.866282	1.5e-10	4.04877	5.15e-05	#ERROR!
SOX18	THAP9	0.055446	0.284193	0.695812	9.81e-06	4.04858	5.15e-05	0/+
ANXA1	THAP9	0.016746	0.746519	0.67522	2.24e-05	4.04805	5.16e-05	0/+
APPBP2	THAP9	0.679574	0	0.92632	2.98e-14	4.04788	5.17e-05	#ERROR!
PDLIM7	THAP9	0.019175	0.711298	0.67632	2.15e-05	4.04601	5.21e-05	0/+
EMX2OS	THAP9	0.068944	0.182789	0.702376	7.43e-06	4.045	5.23e-05	0/+
TMEM43	THAP9	0.390728	4e-15	0.838343	2.12e-09	4.04496	5.23e-05	#ERROR!
DACT3	THAP9	-0.000578	0.991097	0.665323	3.26e-05	4.0448	5.24e-05	0/+
NSMAF	THAP9	0.608716	0	0.906891	8.69e-13	4.04465	5.24e-05	#ERROR!
AZIN2	THAP9	0.195846	0.000135	0.762123	4.02e-07	4.04465	5.24e-05	#ERROR!
NAE1	THAP9	0.524004	0	0.881965	2.57e-11	4.04389	5.26e-05	#ERROR!
PLAA	THAP9	0.532447	0	0.884531	1.88e-11	4.04368	5.26e-05	#ERROR!
PIBF1	THAP9	0.682864	0	0.927053	2.58e-14	4.0431	5.27e-05	#ERROR!
SYNC	THAP9	0.053662	0.300002	0.694282	1.05e-05	4.04268	5.28e-05	0/+
IFIT5	THAP9	0.364362	3.24e-13	0.828812	4.68e-09	4.0425	5.29e-05	#ERROR!
MARCHF2	THAP9	0.076637	0.13853	0.706012	6.35e-06	4.04237	5.29e-05	0/+
NUP42	THAP9	0.559534	0	0.892595	6.71e-12	4.04235	5.29e-05	#ERROR!
CFL2	THAP9	0.265741	1.76e-07	0.791056	7.09e-08	4.04021	5.34e-05	#ERROR!
FAM131B	THAP9	0.070227	0.174757	0.702539	7.38e-06	4.04012	5.34e-05	0/+
DDX55	THAP9	0.560166	0	0.892677	6.64e-12	4.03974	5.35e-05	#ERROR!
NECAB1	THAP9	0.145133	0.004862	0.73884	1.37e-06	4.03912	5.37e-05	#ERROR!
ABCA10	THAP9	0.317095	3.32e-10	0.811073	1.81e-08	4.03907	5.37e-05	#ERROR!
LINC00519	THAP9	0.039979	0.440164	0.686669	1.43e-05	4.03847	5.38e-05	0/+
PGBD4	THAP9	0.510259	0	0.877463	4.37e-11	4.0381	5.39e-05	#ERROR!
RHOJ	THAP9	0.20112	8.79e-05	0.763816	3.66e-07	4.0374	5.4e-05	#ERROR!
PHF21B	THAP9	0.104241	0.043656	0.719134	3.53e-06	4.03647	5.43e-05	#ERROR!
CTDSPL	THAP9	0.432712	0	0.852273	6.05e-10	4.03618	5.43e-05	#ERROR!
FGF13	THAP9	0.264702	1.97e-07	0.790323	7.44e-08	4.03598	5.44e-05	#ERROR!
PFN4	THAP9	0.305853	1.46e-09	0.806535	2.5e-08	4.03568	5.44e-05	#ERROR!
DLGAP2	THAP9	0.127346	0.013592	0.730128	2.11e-06	4.03512	5.46e-05	#ERROR!
CYB5D1	THAP9	0.440481	0	0.854812	4.75e-10	4.03495	5.46e-05	#ERROR!
ARHGAP31-AS1	THAP9	0.2841	2.16e-08	0.797908	4.52e-08	4.03376	5.49e-05	#ERROR!
ADAM22	THAP9	0.355752	1.25e-12	0.825115	6.28e-09	4.0334	5.5e-05	#ERROR!
TRIP6	THAP9	0.092374	0.073991	0.712977	4.67e-06	4.03317	5.5e-05	0/+
CTDSP2	THAP9	0.461924	0	0.861804	2.38e-10	4.03309	5.5e-05	#ERROR!
LINC01138	THAP9	0.412102	0	0.845019	1.18e-09	4.03194	5.53e-05	#ERROR!
LINC00994	THAP9	0.103488	0.045207	0.718292	3.67e-06	4.03153	5.54e-05	#ERROR!
MROH2B	THAP9	0.115649	0.025119	0.724179	2.8e-06	4.03134	5.55e-05	#ERROR!
SEMA3A	THAP9	0.263831	2.17e-07	0.789589	7.79e-08	4.03088	5.56e-05	#ERROR!
MSC-AS1	THAP9	0.146651	0.00443	0.738704	1.38e-06	4.0298	5.58e-05	#ERROR!
RELN	THAP9	0.123269	0.016929	0.727639	2.37e-06	4.02924	5.6e-05	#ERROR!
LPP-AS2	THAP9	0.351571	2.38e-12	0.823314	7.23e-09	4.02919	5.6e-05	#ERROR!
ROR2	THAP9	0.065593	0.20504	0.699047	8.56e-06	4.02901	5.6e-05	0/+
MIR100HG	THAP9	0.056378	0.276163	0.694282	1.05e-05	4.02895	5.6e-05	0/+
LRCH2	THAP9	0.219183	1.85e-05	0.770894	2.44e-07	4.02892	5.6e-05	#ERROR!
DHX40	THAP9	0.642746	0	0.915773	2.05e-13	4.02697	5.65e-05	#ERROR!
SSC5D	THAP9	0.03731	0.471309	0.684018	1.59e-05	4.02674	5.66e-05	0/+
SGCD	THAP9	0.169284	0.000998	0.748786	8.26e-07	4.02653	5.66e-05	#ERROR!
KHDC1	THAP9	0.286669	1.59e-08	0.798313	4.4e-08	4.0253	5.69e-05	#ERROR!
PTPRA	THAP9	0.543628	0	0.887097	1.37e-11	4.02444	5.71e-05	#ERROR!
CGN	THAP9	0.400005	8.88e-16	-0.3585	0.04392	-4.02436	5.71e-05	#ERROR!
CCT4	THAP9	0.528325	0	0.882331	2.46e-11	4.02211	5.77e-05	#ERROR!
RPL10AP3	THAP9	0.18328	0.00036	0.754654	6.05e-07	4.02174	5.78e-05	#ERROR!
TOR1AIP1	THAP9	0.437246	0	0.853006	5.64e-10	4.02154	5.78e-05	#ERROR!
CUEDC1	THAP9	0.262871	2.41e-07	0.78849	8.36e-08	4.0214	5.79e-05	#ERROR!
CNOT7	THAP9	0.63779	0	0.914223	2.67e-13	4.0213	5.79e-05	#ERROR!
LINC00710	THAP9	0.081348	0.115802	0.706289	6.27e-06	4.02128	5.79e-05	0/+
ARMCX2	THAP9	0.198709	0.000107	0.761364	4.19e-07	4.02052	5.81e-05	#ERROR!
NUP210L	THAP9	0.285661	1.79e-08	0.797541	4.63e-08	4.02013	5.82e-05	#ERROR!
TCEAL4	THAP9	0.301947	2.41e-09	0.803886	3.01e-08	4.0194	5.83e-05	#ERROR!
CDHR1	THAP9	0.067466	0.19237	0.699001	8.58e-06	4.01907	5.84e-05	0/+
PKD1L1	THAP9	0.27898	3.93e-08	0.794717	5.59e-08	4.01784	5.87e-05	#ERROR!
COLGALT1	THAP9	0.318378	2.8e-10	0.810117	1.94e-08	4.01783	5.87e-05	#ERROR!
IGHV7-81	THAP9	0.231605	5.85e-06	-0.50916	0.002919	-4.01759	5.88e-05	#ERROR!
ARHGAP29	THAP9	0.399547	8.88e-16	0.839809	1.87e-09	4.01727	5.89e-05	#ERROR!
SH3BGRL	THAP9	0.266379	1.64e-07	0.789589	7.79e-08	4.01707	5.89e-05	#ERROR!
SBF2-AS1	THAP9	0.427615	0	0.849496	7.84e-10	4.01701	5.89e-05	#ERROR!
LOC646588	THAP9	0.106515	0.039243	0.718358	3.66e-06	4.01679	5.9e-05	#ERROR!
HOXB3	THAP9	0.357945	8.9e-13	0.82478	6.44e-09	4.01547	5.93e-05	#ERROR!
RAPGEF6	THAP9	0.501456	0	0.873614	6.76e-11	4.01462	5.95e-05	#ERROR!
NNMT	THAP9	-0.02296	0.657563	0.649194	5.83e-05	4.01452	5.96e-05	0/+
IGLV3-22	THAP9	-0.00752	0.884669	-0.66647	3.12e-05	-4.01443	5.96e-05	0/-
ABCC9	THAP9	0.169679	0.000971	0.747801	8.7e-07	4.0132	5.99e-05	#ERROR!
CYP2U1	THAP9	0.363525	3.7e-13	0.826613	5.58e-09	4.01217	6.02e-05	#ERROR!
LOC100507053	THAP9	0.458255	0	0.859474	3.01e-10	4.01127	6.04e-05	#ERROR!
CACFD1	THAP9	0.346711	4.95e-12	-0.40909	0.020079	-4.01123	6.04e-05	#ERROR!
RPS6KB1	THAP9	0.627156	0	0.910924	4.6e-13	4.01119	6.04e-05	#ERROR!
PPP1R32	THAP9	0.332616	3.88e-11	0.814964	1.36e-08	4.00947	6.09e-05	#ERROR!
CASQ2	THAP9	0.021169	0.682819	0.673387	2.4e-05	4.00883	6.1e-05	0/+
ACTG2	THAP9	-0.00127	0.980509	0.660924	3.83e-05	4.00871	6.11e-05	0/+
TBX1	THAP9	0.130915	0.011161	0.729356	2.19e-06	4.00851	6.11e-05	#ERROR!
NOTCH2NLA	THAP9	0.382014	1.78e-14	0.833059	3.31e-09	4.00828	6.12e-05	#ERROR!
AFF3	THAP9	0.142653	0.00565	0.734855	1.67e-06	4.00795	6.12e-05	#ERROR!
PROS1	THAP9	0.361268	5.28e-13	0.825513	6.08e-09	4.00781	6.13e-05	#ERROR!
ABCE1	THAP9	0.608275	0	0.905425	1.09e-12	4.00689	6.15e-05	#ERROR!
ITGA9-AS1	THAP9	0.381539	1.93e-14	0.832753	3.39e-09	4.00606	6.17e-05	#ERROR!
FLJ16779	THAP9	0.060547	0.242145	0.694003	1.06e-05	4.00518	6.2e-05	0/+
JAZF1	THAP9	0.279214	3.83e-08	0.793878	5.9e-08	4.00511	6.2e-05	#ERROR!
OXCT1-AS1	THAP9	0.22921	7.34e-06	0.77317	2.14e-07	4.00412	6.22e-05	#ERROR!
LONRF2	THAP9	0.195525	0.000139	0.758431	4.93e-07	4.00225	6.27e-05	#ERROR!
GRIK4	THAP9	0.132469	0.010228	0.729507	2.17e-06	4.00217	6.28e-05	#ERROR!
FOXC1	THAP9	0.265552	1.8e-07	0.788123	8.56e-08	4.002	6.28e-05	#ERROR!
LINC02076	THAP9	0.10995	0.033294	0.718593	3.62e-06	4.00174	6.29e-05	#ERROR!
ANKRD46	THAP9	0.615399	0	0.907258	8.21e-13	4.00124	6.3e-05	#ERROR!
MEDAG	THAP9	0.030815	0.551923	0.677786	2.03e-05	4.00097	6.31e-05	0/+
PCYT1B	THAP9	0.211484	3.65e-05	0.765267	3.37e-07	4.00045	6.32e-05	#ERROR!
DNM1	THAP9	0.276744	5.09e-08	0.792522	6.45e-08	4.00017	6.33e-05	#ERROR!
RPGRIP1L	THAP9	0.628481	0	0.910924	4.6e-13	4.00017	6.33e-05	#ERROR!
ANKRD35	THAP9	0.061455	0.235142	0.693915	1.06e-05	3.99973	6.34e-05	0/+
ARSI	THAP9	-0.02588	0.617357	0.645646	6.59e-05	3.99846	6.38e-05	0/+
PCDHB6	THAP9	0.190234	0.000211	0.755686	5.72e-07	3.99754	6.4e-05	#ERROR!
LOC100505715	THAP9	0.204395	6.69e-05	0.761896	4.07e-07	3.99705	6.41e-05	#ERROR!
SLC25A30	THAP9	0.547112	0	0.886995	1.38e-11	3.99704	6.41e-05	#ERROR!
SUPV3L1	THAP9	0.605727	0	0.904326	1.28e-12	3.99664	6.42e-05	#ERROR!
SCML2	THAP9	0.403949	4.44e-16	0.840147	1.81e-09	3.99659	6.43e-05	#ERROR!
HSPB2	THAP9	0.047497	0.359022	0.686222	1.45e-05	3.99626	6.43e-05	0/+
EGFL7	THAP9	0.149905	0.003618	0.73717	1.49e-06	3.99607	6.44e-05	#ERROR!
LINC01347	THAP9	0.476724	0	0.864766	1.75e-10	3.99605	6.44e-05	#ERROR!
ADAMTSL4	THAP9	0.08843	0.087251	0.707241	6.02e-06	3.99492	6.47e-05	0/+
TBL1XR1	THAP9	0.655482	0	0.918255	1.33e-13	3.99469	6.48e-05	#ERROR!
NOTCH2	THAP9	0.376617	4.4e-14	0.830279	4.15e-09	3.99462	6.48e-05	#ERROR!
DCAF12L2	THAP9	0.059093	0.253658	0.692147	1.14e-05	3.99453	6.48e-05	0/+
LINC00924	THAP9	0.061942	0.231443	0.693571	1.08e-05	3.99392	6.5e-05	0/+
NCF2	THAP9	0.021715	0.675109	0.671921	2.54e-05	3.99259	6.54e-05	0/+
PITPNM2	THAP9	0.289124	1.18e-08	0.796921	4.83e-08	3.99253	6.54e-05	#ERROR!
ATE1-AS1	THAP9	0.233297	4.97e-06	0.773942	2.04e-07	3.99204	6.55e-05	#ERROR!
NUDT6	THAP9	0.464606	0	0.860574	2.69e-10	3.99191	6.55e-05	#ERROR!
CNGA3	THAP9	0.055933	0.279978	0.690199	1.24e-05	3.99171	6.56e-05	0/+
ARHGAP22	THAP9	0.123877	0.01639	0.724407	2.77e-06	3.99169	6.56e-05	#ERROR!
AEBP1	THAP9	0.016924	0.74392	0.668988	2.84e-05	3.9899	6.61e-05	0/+
PRELP	THAP9	0.031692	0.540653	0.677053	2.09e-05	3.98972	6.62e-05	0/+
LAPTM4A	THAP9	0.356555	1.1e-12	0.822581	7.65e-09	3.98903	6.63e-05	#ERROR!
SMARCAD1	THAP9	0.764073	0	0.946568	2.22e-16	3.98885	6.64e-05	#ERROR!
TRAF4	THAP9	0.407399	2.22e-16	-0.34457	0.05345	-3.98879	6.64e-05	#ERROR!
HTR7	THAP9	0.100947	0.050784	0.712871	4.69e-06	3.9885	6.65e-05	0/+
POLR2B	THAP9	0.680417	0	0.924853	3.95e-14	3.98842	6.65e-05	#ERROR!
LOC100419831	THAP9	0.489372	0	0.868489	1.18e-10	3.98828	6.66e-05	#ERROR!
KIRREL1	THAP9	0.26546	1.82e-07	0.787023	9.18e-08	3.98791	6.67e-05	#ERROR!
GAB1	THAP9	0.450331	0	0.855572	4.41e-10	3.9873	6.68e-05	#ERROR!
KRIT1	THAP9	0.672411	0	0.922654	6e-14	3.98723	6.68e-05	#ERROR!
RIPOR1	THAP9	0.306993	1.26e-09	0.803519	3.08e-08	3.98616	6.72e-05	#ERROR!
ELAPOR2	THAP9	0.389262	5.11e-15	0.834311	2.98e-09	3.98607	6.72e-05	#ERROR!
LUZP2	THAP9	0.176366	0.000602	0.748395	8.43e-07	3.98528	6.74e-05	#ERROR!
KYAT1	THAP9	0.33768	1.87e-11	0.815215	1.34e-08	3.9845	6.76e-05	#ERROR!
ROBO4	THAP9	0.210657	3.92e-05	0.763563	3.71e-07	3.98417	6.77e-05	#ERROR!
LCA5L	THAP9	0.541617	0	0.884753	1.83e-11	3.98391	6.78e-05	#ERROR!
TPTEP1	THAP9	0.085465	0.098429	0.704545	6.77e-06	3.9829	6.81e-05	0/+
GSAP	THAP9	0.50379	0	0.872801	7.4e-11	3.98164	6.84e-05	#ERROR!
PDZRN3	THAP9	0.221335	1.52e-05	0.767962	2.89e-07	3.98132	6.85e-05	#ERROR!
LINC00987	THAP9	0.134239	0.009251	0.728324	2.3e-06	3.98038	6.88e-05	#ERROR!
EIF2S3	THAP9	0.510915	0	0.875	5.79e-11	3.9802	6.89e-05	#ERROR!
RAB9B	THAP9	0.244237	1.7e-06	0.777482	1.65e-07	3.97839	6.94e-05	#ERROR!
DLG4	THAP9	0.203991	6.92e-05	0.76015	4.48e-07	3.97828	6.94e-05	#ERROR!
PLEKHA5	THAP9	0.521884	0	0.878299	3.96e-11	3.97664	6.99e-05	#ERROR!
POLA1	THAP9	0.616811	0	0.906791	8.83e-13	3.97651	6.99e-05	#ERROR!
DOC2A	THAP9	0.240757	2.4e-06	0.775852	1.82e-07	3.97631	7e-05	#ERROR!
HIGD1B	THAP9	0.206677	5.52e-05	0.761163	4.24e-07	3.97626	7e-05	#ERROR!
DDB2	THAP9	0.312574	6.07e-10	0.804985	2.79e-08	3.97598	7.01e-05	#ERROR!
PTPN12	THAP9	0.487659	0	0.867302	1.34e-10	3.97538	7.03e-05	#ERROR!
TMEM109	THAP9	0.222551	1.36e-05	0.767962	2.89e-07	3.97487	7.04e-05	#ERROR!
CRIP2	THAP9	0.058764	0.256314	0.689883	1.25e-05	3.97436	7.06e-05	0/+
HCG11	THAP9	0.383225	1.47e-14	0.831378	3.8e-09	3.9736	7.08e-05	#ERROR!
FBXL2	THAP9	0.357276	9.87e-13	0.821848	8.1e-09	3.97347	7.08e-05	#ERROR!
KIAA1755	THAP9	0.142383	0.005743	0.731555	1.97e-06	3.9734	7.09e-05	#ERROR!
MACROD2	THAP9	0.258605	3.82e-07	0.783063	1.18e-07	3.97299	7.1e-05	#ERROR!
SPACA6	THAP9	0.245317	1.52e-06	0.777493	1.65e-07	3.97273	7.11e-05	#ERROR!
SYNJ2BP-COX16	THAP9	0.335123	2.71e-11	0.813354	1.53e-08	3.9712	7.15e-05	#ERROR!
C4BPAP2	THAP9	0.056104	0.278506	0.688151	1.34e-05	3.9712	7.15e-05	0/+
MYRF	THAP9	0.322462	1.6e-10	-0.42508	0.0153	-3.97115	7.15e-05	#ERROR!
CCDC183	THAP9	0.444989	0	0.852874	5.71e-10	3.97067	7.17e-05	#ERROR!
MUC13	THAP9	0.267651	1.42e-07	-0.47292	0.006267	-3.9706	7.17e-05	#ERROR!
FAM199X	THAP9	0.660901	0	0.918988	1.17e-13	3.97017	7.18e-05	#ERROR!
DAAM2	THAP9	0.185894	0.000295	0.751352	7.22e-07	3.96969	7.2e-05	#ERROR!
LINC00659	THAP9	0.187864	0.000254	-0.53533	0.001593	-3.96832	7.24e-05	#ERROR!
PTGIS	THAP9	0.124562	0.015801	0.722507	3.02e-06	3.96811	7.24e-05	#ERROR!
KLHL10	THAP9	0.179491	0.000478	0.748261	8.49e-07	3.96748	7.26e-05	#ERROR!
SATB1	THAP9	0.365245	2.81e-13	0.824413	6.63e-09	3.96739	7.27e-05	#ERROR!
PREX2	THAP9	0.343751	7.69e-12	0.816349	1.23e-08	3.96697	7.28e-05	#ERROR!
MYCT1	THAP9	0.218226	2.01e-05	0.765396	3.35e-07	3.96642	7.3e-05	#ERROR!
ADGRB1	THAP9	0.153621	0.002858	0.736138	1.57e-06	3.96554	7.32e-05	#ERROR!
GALNT16	THAP9	0.181602	0.000409	0.7489	8.21e-07	3.96382	7.38e-05	#ERROR!
PGF	THAP9	0.113041	0.028615	0.716289	4.02e-06	3.96205	7.43e-05	#ERROR!
DYSF	THAP9	0.201826	8.29e-05	0.757698	5.13e-07	3.96052	7.48e-05	#ERROR!
CEP97	THAP9	0.663306	0	0.919355	1.1e-13	3.9605	7.48e-05	#ERROR!
IGF1R	THAP9	0.339203	1.5e-11	0.81415	1.45e-08	3.95987	7.5e-05	#ERROR!
CCDC69	THAP9	0.109743	0.033629	0.714443	4.37e-06	3.95982	7.5e-05	#ERROR!
ARHGAP23	THAP9	0.176083	0.000614	0.745968	9.56e-07	3.95907	7.52e-05	#ERROR!
SLC9A5	THAP9	0.47537	0	0.862407	2.24e-10	3.95813	7.55e-05	#ERROR!
ADAM32	THAP9	0.340661	1.21e-11	0.814571	1.4e-08	3.95786	7.56e-05	#ERROR!
PABPC5-AS1	THAP9	0.042407	0.41288	0.679337	1.91e-05	3.95698	7.59e-05	0/+
FLNA	THAP9	0.097096	0.060323	0.707845	5.86e-06	3.95697	7.59e-05	0/+
CALN1	THAP9	0.192507	0.000176	0.753198	6.54e-07	3.95655	7.6e-05	#ERROR!
TM4SF5	THAP9	0.129711	0.011934	-0.57491	0.000578	-3.95611	7.62e-05	#ERROR!
GPRASP1	THAP9	0.251935	7.72e-07	0.778959	1.51e-07	3.95592	7.62e-05	#ERROR!
LOC101929415	THAP9	0.08418	0.103614	0.701181	7.82e-06	3.95592	7.62e-05	0/+
ASAP1	THAP9	0.519089	0	0.876466	4.9e-11	3.95584	7.63e-05	#ERROR!
GLIPR1L2	THAP9	0.219493	1.8e-05	0.765041	3.41e-07	3.95539	7.64e-05	#ERROR!
L3MBTL1	THAP9	0.547395	0	0.885264	1.72e-11	3.95441	7.67e-05	#ERROR!
JAM2	THAP9	0.104939	0.04226	0.71151	4.99e-06	3.95426	7.68e-05	#ERROR!
PWP1	THAP9	0.591097	0	0.89846	3.01e-12	3.95383	7.69e-05	#ERROR!
PARP2	THAP9	0.591997	0	0.898726	2.9e-12	3.9538	7.69e-05	#ERROR!
CREBRF	THAP9	0.507905	0	0.872801	7.4e-11	3.95378	7.69e-05	#ERROR!
COL28A1	THAP9	0.275517	5.87e-08	0.78849	8.36e-08	3.95271	7.73e-05	#ERROR!
RNASEL	THAP9	0.458799	0	0.856567	4.01e-10	3.95229	7.74e-05	#ERROR!
ELOVL4	THAP9	0.151681	0.003234	0.734006	1.75e-06	3.95217	7.74e-05	#ERROR!
ORC5	THAP9	0.519408	0	0.876363	4.95e-11	3.9514	7.77e-05	#ERROR!
HECTD2	THAP9	0.494922	0	0.868481	1.19e-10	3.95123	7.78e-05	#ERROR!
MYLK	THAP9	0.131753	0.010649	0.72434	2.77e-06	3.95065	7.79e-05	#ERROR!
SPIRE1	THAP9	0.308848	9.91e-10	0.801686	3.5e-08	3.94989	7.82e-05	#ERROR!
RTEL1-TNFRSF6B	THAP9	0.388408	6e-15	0.83179	3.67e-09	3.94965	7.83e-05	#ERROR!
PCDHGA6	THAP9	0.259197	3.58e-07	0.781485	1.3e-07	3.9493	7.84e-05	#ERROR!
GPR161	THAP9	0.321509	1.83e-10	0.806452	2.51e-08	3.94699	7.91e-05	#ERROR!
DCN	THAP9	0.091099	0.078085	0.703812	6.99e-06	3.94697	7.91e-05	0/+
DNHD1	THAP9	0.518136	0	0.875733	5.32e-11	3.94652	7.93e-05	#ERROR!
ABCA9	THAP9	0.195476	0.000139	0.753666	6.38e-07	3.94646	7.93e-05	#ERROR!
CYTH3	THAP9	0.415545	0	0.841276	1.64e-09	3.94578	7.95e-05	#ERROR!
LINC00893	THAP9	0.461221	0	0.857038	3.82e-10	3.94574	7.96e-05	#ERROR!
TMC1	THAP9	0.133768	0.009503	0.724819	2.71e-06	3.9454	7.97e-05	#ERROR!
LMBR1	THAP9	0.602142	0	0.901393	1.98e-12	3.94514	7.98e-05	#ERROR!
AGPAT4	THAP9	0.314105	4.96e-10	0.803409	3.11e-08	3.94495	7.98e-05	#ERROR!
SETD7	THAP9	0.402453	4.44e-16	0.83651	2.48e-09	3.94395	8.02e-05	#ERROR!
GLYCTK	THAP9	0.330553	5.2e-11	-0.41312	0.01877	-3.94373	8.02e-05	#ERROR!
KCNMA1	THAP9	0.055132	0.286934	0.684751	1.54e-05	3.94371	8.02e-05	0/+
HNRNPA1L2	THAP9	0.588658	0	0.897342	3.52e-12	3.94359	8.03e-05	#ERROR!
LOC401463	THAP9	0.064714	0.211188	0.689766	1.26e-05	3.94315	8.04e-05	0/+
CRTC3	THAP9	0.415041	0	0.840909	1.7e-09	3.94254	8.06e-05	#ERROR!
ITGA5	THAP9	0.129633	0.011986	0.722507	3.02e-06	3.94214	8.08e-05	#ERROR!
ASB14	THAP9	0.563888	0	0.889807	9.67e-12	3.94203	8.08e-05	#ERROR!
SACS	THAP9	0.48632	0	0.865182	1.68e-10	3.94144	8.1e-05	#ERROR!
TARBP1	THAP9	0.689475	0	0.925953	3.2e-14	3.94103	8.11e-05	#ERROR!
LZTS2	THAP9	0.313228	5.57e-10	0.802786	3.24e-08	3.94101	8.11e-05	#ERROR!
PAXIP1-DT	THAP9	0.458721	0	0.855938	4.26e-10	3.94092	8.12e-05	#ERROR!
EML1	THAP9	0.217193	2.21e-05	0.76283	3.86e-07	3.94081	8.12e-05	#ERROR!
KIAA1549L	THAP9	0.000844	0.987	0.654445	4.84e-05	3.94056	8.13e-05	0/+
OR7E7P	THAP9	0.341805	1.03e-11	0.813844	1.48e-08	3.94047	8.13e-05	#ERROR!
STON1	THAP9	0.191788	0.000187	0.751466	7.17e-07	3.94021	8.14e-05	#ERROR!
RPAP2	THAP9	0.691274	0	0.926405	2.93e-14	3.93971	8.16e-05	#ERROR!
FGD5P1	THAP9	0.18038	0.000448	0.746211	9.45e-07	3.93947	8.17e-05	#ERROR!
RAPGEF3	THAP9	0.224171	1.17e-05	0.765762	3.28e-07	3.93939	8.17e-05	#ERROR!
SEC31B	THAP9	0.476636	0	0.861857	2.37e-10	3.93909	8.18e-05	#ERROR!
CX3CL1	THAP9	0.03637	0.482563	0.67412	2.34e-05	3.93895	8.18e-05	0/+
C3orf52	THAP9	0.414277	0	-0.32814	0.066724	-3.93711	8.25e-05	#ERROR!
DENND2B	THAP9	0.360622	5.85e-13	0.820748	8.81e-09	3.9371	8.25e-05	#ERROR!
GSTM5	THAP9	-0.04084	0.430368	0.629457	0.000114	3.93647	8.27e-05	0/+
MKRN2	THAP9	0.56908	0	0.891129	8.14e-12	3.93568	8.3e-05	#ERROR!
SOCS5	THAP9	0.603344	0	0.901393	1.98e-12	3.93563	8.3e-05	#ERROR!
GPBP1	THAP9	0.649081	0	0.914589	2.51e-13	3.9355	8.3e-05	#ERROR!
C7	THAP9	0.066539	0.19857	0.689883	1.25e-05	3.93504	8.32e-05	0/+
LOC283922	THAP9	0.524463	0	0.877199	4.5e-11	3.93461	8.33e-05	#ERROR!
MIR4787	THAP9	0.110457	0.032484	0.712332	4.81e-06	3.93453	8.34e-05	#ERROR!
BRWD1-AS2	THAP9	0.341669	1.05e-11	0.813293	1.54e-08	3.93304	8.39e-05	#ERROR!
NOX4	THAP9	0.060327	0.243859	0.686291	1.45e-05	3.93209	8.42e-05	0/+
DNAJC9-AS1	THAP9	0.506986	0	0.871471	8.57e-11	3.93203	8.42e-05	#ERROR!
DNAH14	THAP9	0.360615	5.86e-13	0.820391	9.05e-09	3.93163	8.44e-05	#ERROR!
LANCL1	THAP9	0.613839	0	0.904326	1.28e-12	3.93158	8.44e-05	#ERROR!
CFAP97	THAP9	0.597672	0	0.89956	2.58e-12	3.9315	8.44e-05	#ERROR!
RAB23	THAP9	0.310318	8.18e-10	0.800953	3.68e-08	3.93138	8.45e-05	#ERROR!
C2orf74	THAP9	0.195223	0.000142	0.752247	6.88e-07	3.93128	8.45e-05	#ERROR!
SUPT20H	THAP9	0.655727	0	0.916323	1.87e-13	3.93113	8.45e-05	#ERROR!
LINC01638	THAP9	-0.03691	0.476079	0.631149	0.000107	3.93079	8.47e-05	0/+
HOXA4	THAP9	0.122149	0.017963	0.717742	3.77e-06	3.93058	8.47e-05	#ERROR!
LOC105378083	THAP9	0.422728	0	0.842916	1.42e-09	3.9303	8.48e-05	#ERROR!
SELP	THAP9	0.093794	0.06964	0.70351	7.08e-06	3.93026	8.49e-05	0/+
PAX1	THAP9	0.038208	0.460704	0.674096	2.34e-05	3.92946	8.51e-05	0/+
HSPB3	THAP9	-0.04212	0.416042	0.627767	0.00012	3.92886	8.54e-05	0/+
EIF2S1	THAP9	0.480254	0	0.862537	2.21e-10	3.92879	8.54e-05	#ERROR!
PIH1D2	THAP9	0.488846	0	0.865341	1.65e-10	3.92792	8.57e-05	#ERROR!
ATP1A2	THAP9	0.037692	0.466777	0.673632	2.38e-05	3.92778	8.57e-05	0/+
PRMT2	THAP9	0.319316	2.46e-10	0.804252	2.93e-08	3.92777	8.57e-05	#ERROR!
ITPR1	THAP9	0.286359	1.65e-08	0.791056	7.09e-08	3.92777	8.57e-05	#ERROR!
S1PR3	THAP9	0.157817	0.002176	0.734604	1.7e-06	3.92705	8.6e-05	#ERROR!
PTPRG-AS1	THAP9	0.341259	1.11e-11	0.812708	1.61e-08	3.92669	8.61e-05	#ERROR!
HSPA2	THAP9	0.12309	0.017091	0.717742	3.77e-06	3.92577	8.65e-05	#ERROR!
GATD1	THAP9	0.425157	0	0.843475	1.35e-09	3.92512	8.67e-05	#ERROR!
NRCAM	THAP9	0.264315	2.06e-07	0.78174	1.28e-07	3.92492	8.68e-05	#ERROR!
MOB3A	THAP9	0.21693	2.26e-05	0.761364	4.19e-07	3.92458	8.69e-05	#ERROR!
TMTC1	THAP9	0.21531	2.61e-05	0.76063	4.37e-07	3.92437	8.7e-05	#ERROR!
IRF2BPL	THAP9	0.265689	1.77e-07	0.782258	1.24e-07	3.9242	8.7e-05	#ERROR!
TP63	THAP9	0.066361	0.199771	0.688606	1.32e-05	3.92368	8.72e-05	0/+
DNAJC18	THAP9	0.378689	3.11e-14	0.826613	5.58e-09	3.92357	8.72e-05	#ERROR!
MIR3671	THAP9	0.319615	2.36e-10	0.804012	2.98e-08	3.92267	8.76e-05	#ERROR!
LPAR1	THAP9	0.2435	1.83e-06	0.772727	2.19e-07	3.92232	8.77e-05	#ERROR!
HS3ST3A1	THAP9	-0.01707	0.741802	0.641921	7.49e-05	3.92199	8.78e-05	0/+
OGN	THAP9	0.091156	0.077899	0.701246	7.8e-06	3.92115	8.81e-05	0/+
HTRA3	THAP9	-0.07798	0.131737	0.604472	0.000248	3.92096	8.82e-05	0/+
RECK	THAP9	0.24275	1.97e-06	0.772248	2.25e-07	3.92035	8.84e-05	#ERROR!
ATP10A	THAP9	0.140863	0.006289	0.725806	2.59e-06	3.91946	8.87e-05	#ERROR!
ENOX2	THAP9	0.594042	0	0.897993	3.21e-12	3.91877	8.9e-05	#ERROR!
MTMR12	THAP9	0.614339	0	0.903959	1.36e-12	3.91742	8.95e-05	#ERROR!
IFT74	THAP9	0.568817	0	0.890294	9.08e-12	3.91729	8.96e-05	#ERROR!
LINC01315	THAP9	0.203075	7.47e-05	0.754537	6.09e-07	3.91678	8.97e-05	#ERROR!
PDGFB	THAP9	0.185284	0.000309	0.746403	9.35e-07	3.91609	9e-05	#ERROR!
TENM1	THAP9	0.237077	3.45e-06	0.769456	2.65e-07	3.91602	9e-05	#ERROR!
BEAN1	THAP9	0.074306	0.150972	0.691849	1.16e-05	3.91467	9.05e-05	0/+
INTS6-AS1	THAP9	0.499694	0	0.86825	1.22e-10	3.91455	9.06e-05	#ERROR!
HDAC7	THAP9	0.309653	8.92e-10	0.799487	4.06e-08	3.91454	9.06e-05	#ERROR!
TRIP12	THAP9	0.633655	0	0.909457	5.82e-13	3.9138	9.09e-05	#ERROR!
ENTPD8	THAP9	0.275373	5.96e-08	-0.45738	0.00849	-3.9127	9.13e-05	#ERROR!
RIOK1	THAP9	0.598243	0	0.898992	2.79e-12	3.91205	9.15e-05	#ERROR!
GTF2IRD2B	THAP9	0.375785	5.06e-14	0.82478	6.44e-09	3.91161	9.17e-05	#ERROR!
PRPH2	THAP9	0.221627	1.48e-05	0.76235	3.97e-07	3.91157	9.17e-05	#ERROR!
FOXRED2	THAP9	0.405838	2.22e-16	0.835777	2.64e-09	3.91129	9.18e-05	#ERROR!
MOSMO	THAP9	0.565188	0	0.88893	1.08e-11	3.91127	9.18e-05	#ERROR!
SLC25A21	THAP9	0.266703	1.58e-07	0.78166	1.28e-07	3.91095	9.19e-05	#ERROR!
SRGAP2C	THAP9	0.487377	0	0.864003	1.9e-10	3.91093	9.19e-05	#ERROR!
OSTM1	THAP9	0.414058	0	0.83871	2.05e-09	3.91093	9.19e-05	#ERROR!
LRRC29	THAP9	0.21038	4.02e-05	0.757217	5.27e-07	3.90984	9.24e-05	#ERROR!
SECISBP2L	THAP9	0.560655	0	0.887463	1.31e-11	3.90971	9.24e-05	#ERROR!
FBXO36	THAP9	0.378608	3.15e-14	0.825665	6.01e-09	3.909	9.27e-05	#ERROR!
PEG3	THAP9	0.163662	0.001472	0.735704	1.61e-06	3.90888	9.27e-05	#ERROR!
FAM149A	THAP9	0.234148	4.58e-06	0.767595	2.95e-07	3.90874	9.28e-05	#ERROR!
RNF165	THAP9	0.109272	0.034404	0.709193	5.53e-06	3.90861	9.28e-05	#ERROR!
FILIP1	THAP9	0.244374	1.67e-06	0.771994	2.29e-07	3.90849	9.29e-05	#ERROR!
LOC100133091	THAP9	0.446816	0	0.850046	7.45e-10	3.90737	9.33e-05	#ERROR!
FBN1	THAP9	0.189347	0.000226	0.747434	8.86e-07	3.90663	9.36e-05	#ERROR!
GSPT1	THAP9	0.501557	0	0.868402	1.2e-10	3.90514	9.42e-05	#ERROR!
OXTR	THAP9	0.342963	8.64e-12	0.811887	1.71e-08	3.90481	9.43e-05	#ERROR!
ORAI3	THAP9	0.247679	1.2e-06	0.773094	2.15e-07	3.90451	9.44e-05	#ERROR!
FTO	THAP9	0.502773	0	0.868768	1.15e-10	3.90446	9.44e-05	#ERROR!
HSPB7	THAP9	-0.04179	0.419688	0.625	0.000131	3.90426	9.45e-05	0/+
PPP1R3G	THAP9	0.134775	0.008972	0.721408	3.18e-06	3.90421	9.45e-05	#ERROR!
TCP10L	THAP9	0.231962	5.65e-06	0.76625	3.19e-07	3.90393	9.46e-05	#ERROR!
SPARC	THAP9	0.088967	0.085343	0.698314	8.83e-06	3.90332	9.49e-05	0/+
CFAP69	THAP9	0.444321	0	0.848868	8.31e-10	3.90174	9.55e-05	#ERROR!
HSPA1A	THAP9	0.071779	0.165399	0.68915	1.29e-05	3.90147	9.56e-05	0/+
PRSS27	THAP9	0.15148	0.003276	0.72914	2.21e-06	3.90048	9.6e-05	#ERROR!
CNP	THAP9	0.351509	2.4e-12	0.814883	1.37e-08	3.90045	9.6e-05	#ERROR!
RERGL	THAP9	0.078338	0.129955	0.692449	1.13e-05	3.90003	9.62e-05	0/+
PPIL6	THAP9	0.384208	1.22e-14	0.827175	5.33e-09	3.89999	9.62e-05	#ERROR!
EPS8L3	THAP9	0.291045	9.36e-09	-0.44172	0.011374	-3.89964	9.63e-05	#ERROR!
RN7SL471P	THAP9	-0.13715	0.007822	0.562186	0.000812	3.89953	9.64e-05	-/+
DDX18	THAP9	0.621527	0	0.905425	1.09e-12	3.89952	9.64e-05	#ERROR!
RERG	THAP9	0.139595	0.006779	0.72324	2.92e-06	3.89876	9.67e-05	#ERROR!
NOM1	THAP9	0.537325	0	0.879663	3.38e-11	3.89873	9.67e-05	#ERROR!
PRKG1	THAP9	0.284443	2.07e-08	0.788084	8.58e-08	3.89852	9.68e-05	#ERROR!
SMIM17	THAP9	0.317964	2.96e-10	0.801653	3.51e-08	3.8985	9.68e-05	#ERROR!
SCML1	THAP9	0.438216	0	0.846485	1.03e-09	3.89728	9.73e-05	#ERROR!
C1orf54	THAP9	0.102859	0.046537	0.704793	6.7e-06	3.89697	9.74e-05	#ERROR!
PLXNB3	THAP9	0.196584	0.000127	0.749885	7.8e-07	3.89686	9.74e-05	#ERROR!
LINC01023	THAP9	0.144132	0.005168	0.725255	2.66e-06	3.89678	9.75e-05	#ERROR!
DPCD	THAP9	0.249996	9.44e-07	0.77346	2.1e-07	3.89666	9.75e-05	#ERROR!
RIOX1	THAP9	0.336278	2.29e-11	0.808651	2.15e-08	3.89541	9.8e-05	#ERROR!
HBG2	THAP9	0.296756	4.63e-09	0.792821	6.33e-08	3.89437	9.85e-05	#ERROR!
THG1L	THAP9	0.365119	2.87e-13	0.819648	9.58e-09	3.89408	9.86e-05	#ERROR!
NAB2	THAP9	0.204645	6.55e-05	0.753299	6.51e-07	3.89407	9.86e-05	#ERROR!
AMOTL1	THAP9	0.263509	2.25e-07	0.778959	1.51e-07	3.89346	9.88e-05	#ERROR!
GPATCH11	THAP9	0.558444	0	0.886078	1.55e-11	3.89327	9.89e-05	#ERROR!
RBL2	THAP9	0.603759	0	0.899927	2.44e-12	3.89321	9.89e-05	#ERROR!
PSMD5	THAP9	0.632328	0	0.908358	6.92e-13	3.89309	9.9e-05	#ERROR!
TMEM35A	THAP9	0.091077	0.078159	0.698314	8.83e-06	3.89261	9.92e-05	0/+
MTREX	THAP9	0.626148	0	0.906525	9.19e-13	3.89233	9.93e-05	#ERROR!
DSG2	THAP9	0.395829	1.78e-15	-0.33981	0.057062	-3.8921	9.94e-05	#ERROR!
LINC02449	THAP9	0.215451	2.58e-05	0.757906	5.07e-07	3.89122	9.97e-05	#ERROR!
TNFAIP2	THAP9	0.144096	0.005179	0.724707	2.73e-06	3.89115	9.98e-05	#ERROR!
MRTFB	THAP9	0.571217	0	0.889928	9.52e-12	3.89049	0.0001	#ERROR!
ARSJ	THAP9	0.273653	7.26e-08	0.782991	1.18e-07	3.89047	0.0001	#ERROR!
EPAS1	THAP9	0.295621	5.33e-09	0.792045	6.65e-08	3.89013	0.0001	#ERROR!
TMEM178B	THAP9	0.206844	5.44e-05	0.753942	6.29e-07	3.89	0.0001	#ERROR!
RNASEH1	THAP9	0.439167	0	0.846408	1.04e-09	3.88998	0.0001	#ERROR!
RAB19	THAP9	0.337588	1.9e-11	-0.39736	0.024322	-3.8886	0.000101	#ERROR!
PCDHGA2	THAP9	0.193652	0.000161	0.747801	8.7e-07	3.8883	0.000101	#ERROR!
MPPED2	THAP9	0.127553	0.013439	0.716276	4.03e-06	3.88772	0.000101	#ERROR!
MIR646HG	THAP9	0.091343	0.077287	0.697918	8.98e-06	3.88736	0.000101	0/+
TMEM107	THAP9	0.322121	1.68e-10	0.802493	3.31e-08	3.88702	0.000101	#ERROR!
HOOK1	THAP9	0.634012	0	-0.02346	0.898575	-3.88702	0.000101	#ERROR!
NPRL3	THAP9	0.387997	6.44e-15	0.827713	5.11e-09	3.88614	0.000102	#ERROR!
RBBP7	THAP9	0.494479	0	0.865103	1.69e-10	3.88573	0.000102	#ERROR!
CLIC4	THAP9	0.308514	1.03e-09	0.796921	4.83e-08	3.88526	0.000102	#ERROR!
GSN	THAP9	0.110456	0.032487	0.707478	5.96e-06	3.88523	0.000102	#ERROR!
IGF2	THAP9	0.101929	0.048564	0.703079	7.21e-06	3.88458	0.000103	#ERROR!
DNMBP-AS1	THAP9	0.41453	0	-0.31842	0.075705	-3.88398	0.000103	#ERROR!
THOC1	THAP9	0.662694	0	0.916789	1.72e-13	3.88373	0.000103	#ERROR!
BCAM	THAP9	0.218913	1.89e-05	0.758798	4.83e-07	3.88348	0.000103	#ERROR!
GBP2	THAP9	0.141841	0.005933	0.722874	2.97e-06	3.88335	0.000103	#ERROR!
LMLN	THAP9	0.556041	0	0.884897	1.8e-11	3.88327	0.000103	#ERROR!
FAM166B	THAP9	0.24659	1.34e-06	0.770839	2.45e-07	3.88224	0.000103	#ERROR!
PDZD4	THAP9	0.072157	0.163174	0.687317	1.39e-05	3.88201	0.000104	0/+
KRT8P12	THAP9	0.442896	0	0.847268	9.63e-10	3.88198	0.000104	#ERROR!
PAN3	THAP9	0.666804	0	0.917889	1.42e-13	3.88159	0.000104	#ERROR!
MPP6	THAP9	0.510354	0	0.870131	9.92e-11	3.88121	0.000104	#ERROR!
CSP2	THAP9	0.220574	1.63e-05	0.759339	4.69e-07	3.88113	0.000104	#ERROR!
SHQ1	THAP9	0.543596	0	0.880865	2.93e-11	3.881	0.000104	#ERROR!
TNNT3	THAP9	0.083566	0.106164	0.69314	1.1e-05	3.88022	0.000104	0/+
ARL5AP3	THAP9	0.261071	2.93e-07	0.776879	1.71e-07	3.88012	0.000104	#ERROR!
GRIP1	THAP9	0.325041	1.12e-10	0.803152	3.16e-08	3.87994	0.000104	#ERROR!
SOD3	THAP9	-0.05241	0.311438	0.615469	0.000177	3.87983	0.000105	0/+
CTIF	THAP9	0.2396	2.69e-06	0.767595	2.95e-07	3.87964	0.000105	#ERROR!
KIAA1191	THAP9	0.50427	0	0.868035	1.24e-10	3.87933	0.000105	#ERROR!
CDC23	THAP9	0.601886	0	0.898827	2.86e-12	3.87905	0.000105	#ERROR!
SAMD4A	THAP9	0.265319	1.84e-07	0.778592	1.55e-07	3.87897	0.000105	#ERROR!
OMD	THAP9	0.075669	0.143596	0.688846	1.31e-05	3.87886	0.000105	0/+
MAP3K12	THAP9	0.353393	1.8e-12	0.81415	1.45e-08	3.87864	0.000105	#ERROR!
LYPLAL1-DT	THAP9	0.142824	0.005592	0.72288	2.97e-06	3.87836	0.000105	#ERROR!
C4orf54	THAP9	0.109943	0.033305	0.706502	6.22e-06	3.87801	0.000105	#ERROR!
KLHL40	THAP9	0.002089	0.967841	0.647883	6.1e-05	3.87689	0.000106	0/+
DNAJA3	THAP9	0.384638	1.15e-14	0.82588	5.91e-09	3.87685	0.000106	#ERROR!
LINC01197	THAP9	0.130766	0.011254	0.716774	3.94e-06	3.87642	0.000106	#ERROR!
JAK2	THAP9	0.349054	3.48e-12	0.812317	1.65e-08	3.87631	0.000106	#ERROR!
CSRP1	THAP9	0.1508	0.00342	0.72654	2.5e-06	3.87612	0.000106	#ERROR!
ALK	THAP9	0.032901	0.52532	0.665261	3.26e-05	3.87552	0.000106	0/+
METTL2B	THAP9	0.466965	0	0.855205	4.57e-10	3.87428	0.000107	#ERROR!
CADM3	THAP9	-0.04657	0.368504	0.618402	0.000162	3.87419	0.000107	0/+
PIK3R1	THAP9	0.461744	0	0.853372	5.45e-10	3.87364	0.000107	#ERROR!
OR4D6	THAP9	-0.03739	0.470379	0.623953	0.000136	3.87339	0.000107	0/+
RNF150	THAP9	0.077389	0.134686	0.68915	1.29e-05	3.87305	0.000107	0/+
RYR2	THAP9	0.16677	0.001189	0.733871	1.76e-06	3.87271	0.000108	#ERROR!
RAB11FIP5	THAP9	0.364021	3.42e-13	0.817815	1.1e-08	3.87245	0.000108	#ERROR!
ECM1	THAP9	-0.05911	0.253527	0.610337	0.000208	3.87228	0.000108	0/+
PRKACB	THAP9	0.341403	1.09e-11	0.809018	2.1e-08	3.87158	0.000108	#ERROR!
RNU6-924P	THAP9	0.160176	0.001861	0.730622	2.06e-06	3.87155	0.000108	#ERROR!
RAD9B	THAP9	0.442777	0	0.846584	1.02e-09	3.87054	0.000109	#ERROR!
MAP4K4	THAP9	0.433023	0	0.843109	1.4e-09	3.87016	0.000109	#ERROR!
OBSL1	THAP9	0.268721	1.26e-07	0.779326	1.48e-07	3.8699	0.000109	#ERROR!
CFAP300	THAP9	0.194127	0.000155	0.746288	9.41e-07	3.86857	0.000109	#ERROR!
MZF1	THAP9	0.570958	0	0.88893	1.08e-11	3.86835	0.00011	#ERROR!
CHRNB4	THAP9	0.147108	0.004307	0.723939	2.83e-06	3.8675	0.00011	#ERROR!
FBXL22	THAP9	0.198464	0.000109	0.748167	8.53e-07	3.86728	0.00011	#ERROR!
AASS	THAP9	0.482022	0	0.859971	2.86e-10	3.86714	0.00011	#ERROR!
PPP6R3	THAP9	0.676267	0	0.920088	9.59e-14	3.86604	0.000111	#ERROR!
SLIT3	THAP9	0.198821	0.000106	0.748167	8.53e-07	3.86541	0.000111	#ERROR!
FBLN1	THAP9	0.094334	0.068041	0.697214	9.25e-06	3.86526	0.000111	0/+
PLEKHA2	THAP9	0.371118	1.09e-13	0.820015	9.32e-09	3.86475	0.000111	#ERROR!
ANGPT4	THAP9	0.042207	0.415092	0.669239	2.81e-05	3.8647	0.000111	0/+
PBX3	THAP9	0.285672	1.79e-08	0.785924	9.84e-08	3.86319	0.000112	#ERROR!
SPACA9	THAP9	0.218679	1.93e-05	0.756965	5.34e-07	3.86303	0.000112	#ERROR!
DSCC1	THAP9	0.469649	0	0.855519	4.43e-10	3.86286	0.000112	#ERROR!
C1R	THAP9	0.037581	0.468098	0.666422	3.13e-05	3.86242	0.000112	0/+
LOC101927752	THAP9	0.252979	6.92e-07	0.771994	2.29e-07	3.86228	0.000112	#ERROR!
GTF3C3	THAP9	0.687125	0	0.923021	5.6e-14	3.86186	0.000113	#ERROR!
ARL4D	THAP9	0.096988	0.060613	0.698194	8.88e-06	3.86139	0.000113	0/+
IL1R1	THAP9	0.25333	6.67e-07	0.771994	2.29e-07	3.86039	0.000113	#ERROR!
RICTOR	THAP9	0.716413	0	0.931085	1.11e-14	3.86023	0.000113	#ERROR!
KAT2B	THAP9	0.35021	2.92e-12	0.811584	1.74e-08	3.85884	0.000114	#ERROR!
CA5B	THAP9	0.450451	0	0.848607	8.51e-10	3.85843	0.000114	#ERROR!
TCF12	THAP9	0.586585	0	0.893328	6.09e-12	3.85761	0.000115	#ERROR!
PDCD6IPP1	THAP9	0.294816	5.89e-09	0.789243	7.97e-08	3.85692	0.000115	#ERROR!
TNS1	THAP9	0.128448	0.012796	0.71371	4.52e-06	3.85669	0.000115	#ERROR!
MEF2C-AS1	THAP9	0.051613	0.318861	0.673512	2.39e-05	3.8564	0.000115	0/+
CUL2	THAP9	0.651794	0	0.912757	3.41e-13	3.85591	0.000115	#ERROR!
BEX2	THAP9	0.051716	0.317888	0.673511	2.39e-05	3.85586	0.000115	0/+
C14orf28	THAP9	0.437431	0	0.843842	1.31e-09	3.85556	0.000115	#ERROR!
PTGES	THAP9	0.0509	0.325594	0.672899	2.45e-05	3.85435	0.000116	0/+
PLEKHG4	THAP9	0.33794	1.8e-11	0.806452	2.51e-08	3.85411	0.000116	#ERROR!
NACA	THAP9	0.412262	0	0.834677	2.89e-09	3.85411	0.000116	#ERROR!
ARAP3	THAP9	0.321398	1.85e-10	0.799853	3.96e-08	3.85395	0.000116	#ERROR!
PURG	THAP9	0.137106	0.007843	0.717718	3.77e-06	3.8537	0.000116	#ERROR!
HOXA5	THAP9	0.24701	1.28e-06	0.768695	2.77e-07	3.85347	0.000116	#ERROR!
RDX	THAP9	0.459731	0	0.85154	6.48e-10	3.85273	0.000117	#ERROR!
SEL1L3	THAP9	0.443103	0	-0.28079	0.11954	-3.85208	0.000117	#ERROR!
KATNAL1	THAP9	0.392893	2.66e-15	0.827346	5.26e-09	3.85118	0.000118	#ERROR!
EID2	THAP9	0.389167	5.33e-15	0.82588	5.91e-09	3.85002	0.000118	#ERROR!
MON2	THAP9	0.633715	0	0.907258	8.21e-13	3.84993	0.000118	#ERROR!
LDB2	THAP9	0.269136	1.21e-07	0.777931	1.61e-07	3.8498	0.000118	#ERROR!
NKAPL	THAP9	0.040331	0.436148	0.666544	3.11e-05	3.84965	0.000118	0/+
LRRC8C	THAP9	0.352789	1.97e-12	0.81195	1.7e-08	3.84942	0.000118	#ERROR!
AP4S1	THAP9	0.316517	3.59e-10	0.797544	4.63e-08	3.8492	0.000119	#ERROR!
TBXA2R	THAP9	0.085586	0.09795	0.690982	1.2e-05	3.84911	0.000119	0/+
PCDH10	THAP9	-0.02929	0.571737	0.625952	0.000127	3.84909	0.000119	0/+
GPR35	THAP9	0.270398	1.05e-07	-0.45161	0.00947	-3.84901	0.000119	#ERROR!
PTMS	THAP9	0.055558	0.283217	0.674853	2.27e-05	3.84885	0.000119	0/+
MAGEL2	THAP9	0.098688	0.056214	0.697799	9.02e-06	3.84885	0.000119	0/+
FANCM	THAP9	0.655809	0	0.913657	2.94e-13	3.8479	0.000119	#ERROR!
C2orf49	THAP9	0.70173	0	0.926686	2.75e-14	3.84742	0.000119	#ERROR!
NDE1	THAP9	0.330851	4.98e-11	0.803152	3.16e-08	3.84714	0.00012	#ERROR!
TMEM147-AS1	THAP9	0.602615	0	0.89781	3.3e-12	3.84673	0.00012	#ERROR!
STEAP3-AS1	THAP9	0.317958	2.96e-10	0.797945	4.51e-08	3.84668	0.00012	#ERROR!
MIR4740	THAP9	0.198261	0.000111	0.746264	9.42e-07	3.84664	0.00012	#ERROR!
BVES	THAP9	0.229357	7.24e-06	0.760334	4.44e-07	3.84638	0.00012	#ERROR!
CORO6	THAP9	0.272352	8.41e-08	0.779021	1.51e-07	3.84626	0.00012	#ERROR!
NIBAN1	THAP9	0.150574	0.003469	0.723607	2.87e-06	3.84613	0.00012	#ERROR!
SRGAP3-AS2	THAP9	0.201437	8.56e-05	-0.50735	0.003039	-3.84581	0.00012	#ERROR!
CDKN1C	THAP9	0.210868	3.85e-05	0.751833	7.04e-07	3.84427	0.000121	#ERROR!
IGHV3-79	THAP9	0.284455	2.07e-08	-0.43861	0.012035	-3.84401	0.000121	#ERROR!
PSMD12	THAP9	0.573097	0	0.888563	1.13e-11	3.84355	0.000121	#ERROR!
NSUN5P2	THAP9	0.380106	2.44e-14	0.822041	7.98e-09	3.84335	0.000121	#ERROR!
MEIS1	THAP9	0.258261	3.96e-07	0.772727	2.19e-07	3.84296	0.000122	#ERROR!
RARB	THAP9	0.300912	2.75e-09	0.790689	7.26e-08	3.8426	0.000122	#ERROR!
ARID5B	THAP9	0.404214	4.44e-16	0.831012	3.91e-09	3.84248	0.000122	#ERROR!
ARPC4-TTLL3	THAP9	0.402903	4.44e-16	0.830518	4.07e-09	3.84235	0.000122	#ERROR!
RASA1	THAP9	0.552594	0	0.881965	2.57e-11	3.84104	0.000123	#ERROR!
IFT57	THAP9	0.378241	3.35e-14	0.821114	8.56e-09	3.83997	0.000123	#ERROR!
PTPN13	THAP9	0.188638	0.000239	0.741202	1.22e-06	3.83994	0.000123	#ERROR!
PRR3	THAP9	0.548996	0	0.880763	2.97e-11	3.83992	0.000123	#ERROR!
NUP160	THAP9	0.71042	0	0.928886	1.78e-14	3.83971	0.000123	#ERROR!
DHX29	THAP9	0.616294	0	0.901659	1.9e-12	3.8389	0.000124	#ERROR!
OTUD4	THAP9	0.663855	0	0.915689	2.08e-13	3.83877	0.000124	#ERROR!
GTPBP4	THAP9	0.535883	0	0.876466	4.9e-11	3.83861	0.000124	#ERROR!
TENT5B	THAP9	0.082827	0.109302	0.688416	1.33e-05	3.83845	0.000124	0/+
KIF3A	THAP9	0.578159	0	0.889928	9.52e-12	3.83826	0.000124	#ERROR!
MNS1	THAP9	0.431454	0	0.840697	1.73e-09	3.83815	0.000124	#ERROR!
LINC02202	THAP9	0.127833	0.013235	0.711535	4.98e-06	3.83758	0.000124	#ERROR!
TBX18-AS1	THAP9	0.141953	0.005893	0.718514	3.64e-06	3.83706	0.000125	#ERROR!
ERGIC2	THAP9	0.479172	0	0.857405	3.69e-10	3.83659	0.000125	#ERROR!
APPL1	THAP9	0.644036	0	0.909824	5.49e-13	3.83613	0.000125	#ERROR!
IGFL2	THAP9	-0.06007	0.245882	0.605203	0.000243	3.83612	0.000125	0/+
TAGLN	THAP9	-0.03182	0.539035	0.622801	0.000141	3.83581	0.000125	0/+
THRB	THAP9	0.305827	1.47e-09	0.792155	6.61e-08	3.8351	0.000126	#ERROR!
SUN2	THAP9	0.274282	6.75e-08	0.778959	1.51e-07	3.83496	0.000126	#ERROR!
ELN	THAP9	0.110272	0.032778	0.702346	7.44e-06	3.83478	0.000126	#ERROR!
ATG16L2	THAP9	0.506501	0	0.866569	1.45e-10	3.83443	0.000126	#ERROR!
CRYBG3	THAP9	0.438854	0	0.843109	1.4e-09	3.83389	0.000126	#ERROR!
RN7SL526P	THAP9	0.163451	0.001493	0.728689	2.26e-06	3.83379	0.000126	#ERROR!
SH3TC2	THAP9	0.159021	0.00201	0.726539	2.5e-06	3.83369	0.000126	#ERROR!
CFAP70	THAP9	0.466164	0	0.852717	5.8e-10	3.83315	0.000127	#ERROR!
GSTM2	THAP9	0.278949	3.95e-08	0.780792	1.35e-07	3.83307	0.000127	#ERROR!
TNNI1	THAP9	0.42009	0	-0.30318	0.091646	-3.8329	0.000127	#ERROR!
GPT	THAP9	0.185107	0.000314	-0.51796	0.002394	-3.83288	0.000127	#ERROR!
ST6GALNAC6	THAP9	0.152408	0.003088	0.72324	2.92e-06	3.83281	0.000127	#ERROR!
ABHD12B	THAP9	0.076223	0.140677	0.684299	1.57e-05	3.83271	0.000127	0/+
JMJD8	THAP9	0.202662	7.73e-05	0.747067	9.04e-07	3.83269	0.000127	#ERROR!
PIFO	THAP9	0.194145	0.000155	0.743103	1.11e-06	3.83246	0.000127	#ERROR!
MYOSLID	THAP9	0.145309	0.00481	0.719707	3.44e-06	3.83225	0.000127	#ERROR!
PSKH1	THAP9	0.375726	5.11e-14	0.819648	9.58e-09	3.83214	0.000127	#ERROR!
SPHK1	THAP9	0.052852	0.307364	0.671554	2.58e-05	3.83213	0.000127	0/+
STK3	THAP9	0.532567	0	0.87508	5.73e-11	3.83202	0.000127	#ERROR!
PPP2R2C	THAP9	0.094152	0.068575	0.693612	1.07e-05	3.83104	0.000128	0/+
GMPS	THAP9	0.579541	0	0.890029	9.4e-12	3.83025	0.000128	#ERROR!
FRG1	THAP9	0.349583	3.21e-12	0.809384	2.04e-08	3.83014	0.000128	#ERROR!
DDX6	THAP9	0.594955	0	0.894795	5e-12	3.82965	0.000128	#ERROR!
PODN	THAP9	0.081829	0.113655	0.68695	1.41e-05	3.8295	0.000128	0/+
MAP7D1	THAP9	0.139692	0.006741	0.716642	3.96e-06	3.82925	0.000129	#ERROR!
CREBZF	THAP9	0.681494	0	0.920455	8.99e-14	3.82925	0.000129	#ERROR!
RIOK2	THAP9	0.564572	0	0.885264	1.72e-11	3.82914	0.000129	#ERROR!
STAT5A	THAP9	0.244893	1.59e-06	0.765762	3.28e-07	3.82891	0.000129	#ERROR!
JADE2	THAP9	0.204206	6.8e-05	0.747434	8.86e-07	3.82876	0.000129	#ERROR!
SETDB2	THAP9	0.640024	0	0.908358	6.92e-13	3.82795	0.000129	#ERROR!
LRRC58	THAP9	0.653799	0	0.91239	3.62e-13	3.82726	0.00013	#ERROR!
RPL22	THAP9	0.438957	0	0.842742	1.44e-09	3.82687	0.00013	#ERROR!
LAMA4	THAP9	0.273217	7.63e-08	0.777859	1.62e-07	3.8267	0.00013	#ERROR!
TCEANC2	THAP9	0.658909	0	0.913856	2.84e-13	3.82648	0.00013	#ERROR!
TBCEL	THAP9	0.485248	0	0.85895	3.17e-10	3.82624	0.00013	#ERROR!
TMEM9B-AS1	THAP9	0.420561	0	0.836037	2.58e-09	3.82619	0.00013	#ERROR!
TCF7L1	THAP9	0.271392	9.37e-08	0.777014	1.7e-07	3.82586	0.00013	#ERROR!
CHST3	THAP9	0.12428	0.016041	0.708578	5.68e-06	3.82572	0.00013	#ERROR!
TRIM23	THAP9	0.590746	0	0.893328	6.09e-12	3.82553	0.00013	#ERROR!
JPH3	THAP9	0.124858	0.015552	0.708784	5.63e-06	3.82486	0.000131	#ERROR!
MGARP	THAP9	0.201218	8.72e-05	0.745708	9.69e-07	3.82481	0.000131	#ERROR!
PCDHGB4	THAP9	0.188184	0.000248	0.739621	1.32e-06	3.82467	0.000131	#ERROR!
PDCD7	THAP9	0.518945	0	0.870235	9.81e-11	3.82449	0.000131	#ERROR!
PCOLCE-AS1	THAP9	0.198329	0.000111	0.744305	1.04e-06	3.82408	0.000131	#ERROR!
LINC00639	THAP9	0.120017	0.020085	0.706228	6.29e-06	3.82383	0.000131	#ERROR!
STRADA	THAP9	0.559833	0	0.883512	2.13e-11	3.82354	0.000132	#ERROR!
SMG8	THAP9	0.528829	0	0.87343	6.9e-11	3.82297	0.000132	#ERROR!
CNN1	THAP9	-0.04114	0.426946	0.615469	0.000177	3.82295	0.000132	0/+
ARMCX4	THAP9	0.365954	2.51e-13	0.815249	1.33e-08	3.82243	0.000132	#ERROR!
MAPK1	THAP9	0.635818	0	0.906891	8.69e-13	3.82176	0.000133	#ERROR!
A2MP1	THAP9	0.190526	0.000206	0.74045	1.27e-06	3.82167	0.000133	#ERROR!
CA11	THAP9	0.112323	0.029649	0.702044	7.54e-06	3.82131	0.000133	#ERROR!
SNORD114-3	THAP9	0.045911	0.375311	0.666513	3.12e-05	3.8212	0.000133	0/+
GTF2F2	THAP9	0.49448	0	0.861804	2.38e-10	3.8204	0.000133	#ERROR!
ANKS3	THAP9	0.499905	0	0.863636	1.97e-10	3.8202	0.000133	#ERROR!
ENTPD5	THAP9	0.378758	3.06e-14	-0.34494	0.05318	-3.8202	0.000133	#ERROR!
TANGO6	THAP9	0.412958	0	0.832845	3.37e-09	3.81959	0.000134	#ERROR!
PNPLA8	THAP9	0.614213	0	0.900293	2.32e-12	3.81923	0.000134	#ERROR!
SMPD3	THAP9	0.236846	3.53e-06	-0.47507	0.006002	-3.81885	0.000134	#ERROR!
GJA1	THAP9	0.196716	0.000126	0.743035	1.11e-06	3.81823	0.000134	#ERROR!
RPS27AP6	THAP9	0.121703	0.01839	0.706525	6.21e-06	3.8182	0.000134	#ERROR!
TMEM125	THAP9	0.300928	2.74e-09	-0.41972	0.016782	-3.81815	0.000134	#ERROR!
SRSF12	THAP9	0.293808	6.67e-09	0.785885	9.86e-08	3.81792	0.000135	#ERROR!
NUP58	THAP9	0.574187	0	0.88783	1.25e-11	3.81787	0.000135	#ERROR!
LIN7B	THAP9	0.327895	7.55e-11	0.799853	3.96e-08	3.81737	0.000135	#ERROR!
TCEANC	THAP9	0.540187	0	0.876868	4.68e-11	3.81684	0.000135	#ERROR!
SEC24AP1	THAP9	0.163871	0.001451	0.727233	2.42e-06	3.81601	0.000136	#ERROR!
FGF12	THAP9	0.306414	1.36e-09	0.790945	7.14e-08	3.8155	0.000136	#ERROR!
PDGFRB	THAP9	0.157392	0.002237	0.723974	2.82e-06	3.81483	0.000136	#ERROR!
DPY19L2P2	THAP9	0.36245	4.38e-13	0.813308	1.54e-08	3.81375	0.000137	#ERROR!
MRPS30	THAP9	0.53968	0	0.876547	4.85e-11	3.81345	0.000137	#ERROR!
DPY19L2	THAP9	0.298199	3.87e-09	0.787351	8.99e-08	3.81306	0.000137	#ERROR!
TRAPPC11	THAP9	0.648253	0	0.910274	5.11e-13	3.81286	0.000137	#ERROR!
LINC01126	THAP9	0.486576	0	0.85869	3.25e-10	3.81251	0.000138	#ERROR!
RIC1	THAP9	0.514215	0	0.868035	1.24e-10	3.81169	0.000138	#ERROR!
IQCG	THAP9	0.452714	0	0.846774	1.01e-09	3.8113	0.000138	#ERROR!
GJB1	THAP9	0.220101	1.7e-05	-0.48744	0.004659	-3.81095	0.000138	#ERROR!
SSTR1	THAP9	0.34224	9.62e-12	-0.37977	0.032044	-3.81069	0.000139	#ERROR!
MED27	THAP9	0.386838	7.77e-15	0.822473	7.71e-09	3.81031	0.000139	#ERROR!
LOC101928401	THAP9	0.170951	0.000888	0.730114	2.11e-06	3.81025	0.000139	#ERROR!
NUP205	THAP9	0.577649	0	0.888563	1.13e-11	3.80926	0.000139	#ERROR!
RBM24	THAP9	0.151914	0.003187	0.720755	3.28e-06	3.8092	0.000139	#ERROR!
SPIRE2	THAP9	0.361271	5.28e-13	-0.3607	0.042548	-3.80882	0.00014	#ERROR!
S1PR2	THAP9	0.18219	0.000391	0.735337	1.64e-06	3.80863	0.00014	#ERROR!
COL18A1	THAP9	0.149691	0.003667	0.719575	3.46e-06	3.8083	0.00014	#ERROR!
PCDHGB7	THAP9	0.170794	0.000898	0.729839	2.14e-06	3.8081	0.00014	#ERROR!
KIF12	THAP9	0.342873	8.76e-12	-0.3787	0.032569	-3.80804	0.00014	#ERROR!
DKK3	THAP9	0.215398	2.59e-05	0.750733	7.46e-07	3.80764	0.00014	#ERROR!
CCN2	THAP9	0.120619	0.019465	0.704912	6.66e-06	3.80755	0.00014	#ERROR!
SNORA73B	THAP9	0.099929	0.053176	-0.57533	0.000571	-3.80721	0.000141	0/-
LCA5	THAP9	0.465848	0	0.851173	6.71e-10	3.80681	0.000141	#ERROR!
PPWD1	THAP9	0.644969	0	0.909091	6.16e-13	3.80673	0.000141	#ERROR!
C20orf194	THAP9	0.342587	9.14e-12	0.804985	2.79e-08	3.80658	0.000141	#ERROR!
FRS2	THAP9	0.636397	0	0.906525	9.19e-13	3.80648	0.000141	#ERROR!
NDUFAF2	THAP9	0.202293	7.97e-05	0.744501	1.03e-06	3.8055	0.000142	#ERROR!
KNL1	THAP9	0.594877	0	-0.07002	0.703346	-3.80517	0.000142	#ERROR!
PWAR5	THAP9	0.191938	0.000185	0.739505	1.33e-06	3.80377	0.000143	#ERROR!
ADGRB3	THAP9	0.056866	0.272022	0.67064	2.67e-05	3.80347	0.000143	0/+
LRP1B	THAP9	0.141753	0.005964	0.715046	4.26e-06	3.80217	0.000143	#ERROR!
FAM186B	THAP9	0.526877	0	0.871767	8.3e-11	3.80148	0.000144	#ERROR!
CYP2T1P	THAP9	0.39675	1.33e-15	0.825665	6.01e-09	3.80143	0.000144	#ERROR!
MEX3B	THAP9	0.261803	2.71e-07	0.770894	2.44e-07	3.80098	0.000144	#ERROR!
LOC105371264	THAP9	0.159627	0.00193	-0.53239	0.001709	-3.80097	0.000144	#ERROR!
MT1JP	THAP9	-0.00913	0.860159	0.632329	0.000103	3.80063	0.000144	0/+
RHNO1	THAP9	0.298521	3.71e-09	0.786546	9.46e-08	3.80062	0.000144	#ERROR!
GDF10	THAP9	0.076137	0.14113	0.680847	1.8e-05	3.80059	0.000144	0/+
ROM1	THAP9	0.190467	0.000207	0.738425	1.4e-06	3.79947	0.000145	#ERROR!
SEMA4G	THAP9	0.329568	5.97e-11	-0.39003	0.027329	-3.79944	0.000145	#ERROR!
ARMC8	THAP9	0.608411	0	0.897727	3.34e-12	3.79849	0.000146	#ERROR!
ANK2	THAP9	0.226013	9.9e-06	0.754765	6.01e-07	3.79831	0.000146	#ERROR!
NPEPL1	THAP9	0.47244	0	0.853006	5.64e-10	3.79793	0.000146	#ERROR!
LATS2	THAP9	0.369229	1.48e-13	0.814883	1.37e-08	3.79785	0.000146	#ERROR!
EDA	THAP9	0.303715	1.92e-09	0.78849	8.36e-08	3.79763	0.000146	#ERROR!
PKD1P3	THAP9	0.409389	0	0.830171	4.19e-09	3.79759	0.000146	#ERROR!
CACNB4	THAP9	0.319171	2.51e-10	0.794867	5.53e-08	3.79748	0.000146	#ERROR!
SHPRH	THAP9	0.70027	0	0.924853	3.95e-14	3.79729	0.000146	#ERROR!
LOC102723566	THAP9	0.351979	2.23e-12	0.808066	2.24e-08	3.79718	0.000146	#ERROR!
PLD5	THAP9	0.071441	0.167402	0.67792	2.02e-05	3.79699	0.000146	0/+
OGT	THAP9	0.674786	0	0.917522	1.52e-13	3.79677	0.000147	#ERROR!
ROBO3	THAP9	0.261506	2.79e-07	0.770415	2.51e-07	3.79665	0.000147	#ERROR!
FJX1	THAP9	0.149757	0.003652	0.718475	3.64e-06	3.7965	0.000147	#ERROR!
CAMK1D	THAP9	0.188561	0.00024	0.73717	1.49e-06	3.79556	0.000147	#ERROR!
FGFR1	THAP9	0.175536	0.000639	0.730938	2.03e-06	3.79535	0.000147	#ERROR!
PCDH9	THAP9	0.089959	0.081902	0.687683	1.37e-05	3.79524	0.000148	0/+
RBMXL1	THAP9	0.569408	0	0.885345	1.7e-11	3.79513	0.000148	#ERROR!
RIMS3	THAP9	0.188074	0.00025	0.736871	1.52e-06	3.7948	0.000148	#ERROR!
MAP3K8	THAP9	0.325757	1.02e-10	0.79736	4.69e-08	3.79476	0.000148	#ERROR!
COL21A1	THAP9	0.276312	5.35e-08	0.776647	1.74e-07	3.79442	0.000148	#ERROR!
LOXL1	THAP9	0.105376	0.041403	0.695628	9.88e-06	3.79356	0.000149	#ERROR!
IRAK1BP1	THAP9	0.603417	0	0.895977	4.25e-12	3.79317	0.000149	#ERROR!
JAG2	THAP9	0.251574	8.01e-07	0.765762	3.28e-07	3.79304	0.000149	#ERROR!
DMTF1	THAP9	0.703333	0	0.925587	3.42e-14	3.79253	0.000149	#ERROR!
MANSC4	THAP9	0.324155	1.27e-10	0.796497	4.97e-08	3.79186	0.00015	#ERROR!
CFAP58	THAP9	0.226587	9.38e-06	0.754435	6.12e-07	3.79139	0.00015	#ERROR!
PLA2G2C	THAP9	0.136254	0.00824	0.711221	5.05e-06	3.7912	0.00015	#ERROR!
RNF2	THAP9	0.589367	0	0.891496	7.76e-12	3.79083	0.00015	#ERROR!
HNRNPA3	THAP9	0.54042	0	0.875733	5.32e-11	3.79054	0.00015	#ERROR!
MPRIP	THAP9	0.422747	0	0.834677	2.89e-09	3.79013	0.000151	#ERROR!
EBF1	THAP9	0.186579	0.00028	0.735704	1.61e-06	3.78977	0.000151	#ERROR!
PJA2	THAP9	0.496924	0	0.86107	2.56e-10	3.78976	0.000151	#ERROR!
SLC6A16	THAP9	0.243215	1.88e-06	0.76173	4.11e-07	3.78915	0.000151	#ERROR!
IGFBP6	THAP9	-0.03382	0.513801	0.615836	0.000175	3.78898	0.000151	0/+
CNEP1R1	THAP9	0.557724	0	0.881312	2.78e-11	3.78893	0.000151	#ERROR!
MCUB	THAP9	0.25495	5.63e-07	0.766862	3.08e-07	3.78829	0.000152	#ERROR!
ARHGAP1	THAP9	0.368131	1.77e-13	0.813783	1.48e-08	3.78781	0.000152	#ERROR!
CTSL	THAP9	0.207	5.37e-05	0.74512	9.99e-07	3.78774	0.000152	#ERROR!
COG5	THAP9	0.605033	0	0.896261	4.09e-12	3.78762	0.000152	#ERROR!
MXRA7	THAP9	0.166828	0.001185	0.725806	2.59e-06	3.78547	0.000153	#ERROR!
KRBA2	THAP9	0.409198	0	0.829345	4.48e-09	3.78537	0.000153	#ERROR!
FIGN	THAP9	0.210784	3.88e-05	0.746654	9.23e-07	3.78524	0.000154	#ERROR!
SNX25	THAP9	0.567967	0	0.884429	1.9e-11	3.78458	0.000154	#ERROR!
NKD1	THAP9	0.208787	4.61e-05	0.745601	9.75e-07	3.78379	0.000154	#ERROR!
SERPINB9	THAP9	0.199528	0.0001	0.74127	1.22e-06	3.78369	0.000155	#ERROR!
CFLAR	THAP9	0.414932	0	0.831378	3.8e-09	3.78357	0.000155	#ERROR!
RPS2P32	THAP9	0.15211	0.003147	0.718349	3.66e-06	3.78305	0.000155	#ERROR!
MAPK10	THAP9	0.159066	0.002004	0.721774	3.13e-06	3.78298	0.000155	#ERROR!
RBPJ	THAP9	0.652646	0	0.910557	4.88e-13	3.78283	0.000155	#ERROR!
NFIC	THAP9	0.186371	0.000285	0.734971	1.66e-06	3.78281	0.000155	#ERROR!
MRGPRF	THAP9	-0.00426	0.934518	0.633065	0.000101	3.78227	0.000155	0/+
EEF1AKMT3	THAP9	0.478775	0	0.854367	4.96e-10	3.78198	0.000156	#ERROR!
SOX12	THAP9	0.340535	1.24e-11	0.802419	3.33e-08	3.78177	0.000156	#ERROR!
RFX2	THAP9	0.243863	1.76e-06	0.761364	4.19e-07	3.78128	0.000156	#ERROR!
ACSS3	THAP9	0.206882	5.42e-05	0.744455	1.03e-06	3.78084	0.000156	#ERROR!
HAUS2	THAP9	0.586252	0	0.890029	9.4e-12	3.77905	0.000157	#ERROR!
DENND5A	THAP9	0.367764	1.87e-13	0.81305	1.57e-08	3.77903	0.000157	#ERROR!
SNX21	THAP9	0.276854	5.03e-08	0.77566	1.84e-07	3.77894	0.000157	#ERROR!
EXOC5	THAP9	0.629988	0	0.903592	1.43e-12	3.77869	0.000158	#ERROR!
NPIPB6	THAP9	0.311517	6.98e-10	0.790271	7.46e-08	3.77803	0.000158	#ERROR!
SLC7A2	THAP9	0.317943	2.96e-10	0.792889	6.3e-08	3.77741	0.000158	#ERROR!
REST	THAP9	0.673176	0	0.916422	1.84e-13	3.77683	0.000159	#ERROR!
LINC02649	THAP9	0.267274	1.49e-07	0.77128	2.39e-07	3.77615	0.000159	#ERROR!
HNF1A	THAP9	0.393447	2.44e-15	-0.32172	0.072556	-3.77557	0.00016	#ERROR!
AXL	THAP9	0.070052	0.175834	0.674853	2.27e-05	3.77554	0.00016	0/+
PPT2	THAP9	0.487166	0	0.856933	3.86e-10	3.7751	0.00016	#ERROR!
COL6A2	THAP9	0.030275	0.558919	0.652493	5.19e-05	3.77508	0.00016	0/+
RHOT1	THAP9	0.670918	0	0.915689	2.08e-13	3.77461	0.00016	#ERROR!
ATP11C	THAP9	0.499267	0	0.86107	2.56e-10	3.77406	0.000161	#ERROR!
PPHLN1	THAP9	0.619787	0	0.900293	2.32e-12	3.77389	0.000161	#ERROR!
MAP1B	THAP9	0.21067	3.92e-05	0.745601	9.75e-07	3.77387	0.000161	#ERROR!
AUTS2	THAP9	0.255997	5.04e-07	0.766129	3.21e-07	3.77369	0.000161	#ERROR!
NVL	THAP9	0.637848	0	0.905792	1.03e-12	3.77353	0.000161	#ERROR!
FBXO32	THAP9	0.213198	3.14e-05	0.746701	9.21e-07	3.77303	0.000161	#ERROR!
MIR137HG	THAP9	0.001485	0.977129	0.635393	9.34e-05	3.77297	0.000161	0/+
TERF2IP	THAP9	0.371638	9.99e-14	0.81415	1.45e-08	3.77281	0.000161	#ERROR!
SNX15	THAP9	0.543892	0	0.876054	5.13e-11	3.77272	0.000161	#ERROR!
ADAM21	THAP9	0.171984	0.000825	0.727116	2.43e-06	3.77269	0.000161	#ERROR!
SERF1A	THAP9	0.31932	2.46e-10	0.793031	6.24e-08	3.77162	0.000162	#ERROR!
PAK5	THAP9	0.143877	0.005248	0.713133	4.64e-06	3.77157	0.000162	#ERROR!
B3GLCT	THAP9	0.44603	0	0.842086	1.53e-09	3.77117	0.000162	#ERROR!
HEPACAM2	THAP9	0.290044	1.06e-08	-0.42185	0.016178	-3.77113	0.000163	#ERROR!
PGR	THAP9	0.163703	0.001468	0.722874	2.97e-06	3.77058	0.000163	#ERROR!
RIMS1	THAP9	0.104881	0.042374	0.692879	1.11e-05	3.76934	0.000164	#ERROR!
RTL8A	THAP9	0.209978	4.16e-05	0.744868	1.01e-06	3.76921	0.000164	#ERROR!
RTL8C	THAP9	0.128893	0.012486	0.705279	6.56e-06	3.76888	0.000164	#ERROR!
KCTD10	THAP9	0.391224	3.55e-15	0.821481	8.33e-09	3.76887	0.000164	#ERROR!
LOC284395	THAP9	0.104486	0.043161	0.692566	1.12e-05	3.76832	0.000164	#ERROR!
TGFBR3	THAP9	0.279665	3.63e-08	0.776026	1.8e-07	3.76823	0.000164	#ERROR!
NOL11	THAP9	0.573576	0	0.885528	1.66e-11	3.76823	0.000164	#ERROR!
CCDC88A	THAP9	0.4116	0	0.829179	4.54e-09	3.76815	0.000164	#ERROR!
NLGN2	THAP9	0.231721	5.78e-06	0.754765	6.01e-07	3.76796	0.000165	#ERROR!
RABL2A	THAP9	0.528067	0	0.870554	9.48e-11	3.76781	0.000165	#ERROR!
AGTPBP1	THAP9	0.646688	0	0.908258	7.03e-13	3.76779	0.000165	#ERROR!
RAD52	THAP9	0.580858	0	0.88783	1.25e-11	3.76744	0.000165	#ERROR!
NPM1	THAP9	0.358672	7.94e-13	0.808651	2.15e-08	3.76709	0.000165	#ERROR!
CASP7	THAP9	0.333429	3.45e-11	-0.38087	0.03151	-3.76707	0.000165	#ERROR!
CDC42EP3	THAP9	0.237781	3.22e-06	0.757401	5.21e-07	3.76665	0.000165	#ERROR!
KLHL26	THAP9	0.340558	1.23e-11	0.80132	3.59e-08	3.76612	0.000166	#ERROR!
ARFGEF3	THAP9	0.509338	0	-0.18348	0.314792	-3.7654	0.000166	#ERROR!
CLK4	THAP9	0.611028	0	0.89726	3.56e-12	3.76539	0.000166	#ERROR!
FAM228B	THAP9	0.400456	6.66e-16	0.82478	6.44e-09	3.76526	0.000166	#ERROR!
SDHAP1	THAP9	0.548408	0	0.877199	4.5e-11	3.76521	0.000166	#ERROR!
ANO2	THAP9	0.226038	9.87e-06	0.751925	7e-07	3.76509	0.000166	#ERROR!
CUL4A	THAP9	0.635274	0	0.904692	1.22e-12	3.76464	0.000167	#ERROR!
DCAF10	THAP9	0.609092	0	0.896628	3.89e-12	3.76464	0.000167	#ERROR!
PID1	THAP9	0.252919	6.97e-07	0.764	3.62e-07	3.7644	0.000167	#ERROR!
CCL14	THAP9	0.171379	0.000861	0.725873	2.58e-06	3.76258	0.000168	#ERROR!
ANKS4B	THAP9	0.222634	1.35e-05	-0.47801	0.005657	-3.76238	0.000168	#ERROR!
OSBPL5	THAP9	0.269902	1.11e-07	0.771261	2.39e-07	3.76164	0.000169	#ERROR!
MYO9A	THAP9	0.551204	0	0.877933	4.14e-11	3.76109	0.000169	#ERROR!
FKBP11	THAP9	0.333279	3.53e-11	-0.37998	0.031938	-3.76102	0.000169	#ERROR!
ACSL1	THAP9	0.362505	4.35e-13	0.809751	1.99e-08	3.76095	0.000169	#ERROR!
MFSD14A	THAP9	0.640545	0	0.906158	9.73e-13	3.76086	0.000169	#ERROR!
AARD	THAP9	0.021269	0.681411	0.645587	6.61e-05	3.76037	0.00017	0/+
SWAP70	THAP9	0.431578	0	0.836144	2.55e-09	3.76016	0.00017	#ERROR!
PTPRM	THAP9	0.30088	2.76e-09	0.784457	1.08e-07	3.76009	0.00017	#ERROR!
DNAJC22	THAP9	0.35131	2.47e-12	-0.36217	0.041653	-3.75984	0.00017	#ERROR!
INTS8	THAP9	0.640733	0	0.906158	9.73e-13	3.75925	0.00017	#ERROR!
SEC61A2	THAP9	0.587935	0	0.889744	9.75e-12	3.75921	0.00017	#ERROR!
ADAMTS9-AS1	THAP9	0.156827	0.002322	0.718372	3.66e-06	3.75894	0.000171	#ERROR!
ABCF2	THAP9	0.465081	0	0.84824	8.81e-10	3.7586	0.000171	#ERROR!
RBM28	THAP9	0.640899	0	0.906158	9.73e-13	3.75784	0.000171	#ERROR!
ELMOD1	THAP9	0.091216	0.077702	0.684402	1.56e-05	3.75762	0.000172	0/+
CHST10	THAP9	0.280775	3.19e-08	0.77566	1.84e-07	3.75753	0.000172	#ERROR!
ADAMTS2	THAP9	0.073103	0.157715	0.674487	2.3e-05	3.75671	0.000172	0/+
LOC100506474	THAP9	0.181677	0.000406	0.730277	2.09e-06	3.75624	0.000172	#ERROR!
THSD7B	THAP9	0.153564	0.002868	0.716473	3.99e-06	3.75608	0.000173	#ERROR!
FHL1	THAP9	0.081293	0.116046	0.678886	1.94e-05	3.75608	0.000173	0/+
PIGL	THAP9	0.516056	0	0.865915	1.56e-10	3.75606	0.000173	#ERROR!
MYOZ1	THAP9	0.056086	0.278664	0.664955	3.3e-05	3.75571	0.000173	0/+
TFAM	THAP9	0.602026	0	0.894062	5.52e-12	3.75568	0.000173	#ERROR!
SNCA	THAP9	0.194698	0.000148	0.736437	1.55e-06	3.75538	0.000173	#ERROR!
MOXD1	THAP9	0.096446	0.062071	0.68695	1.41e-05	3.75527	0.000173	0/+
MEF2A	THAP9	0.51169	0	0.86437	1.83e-10	3.75499	0.000173	#ERROR!
FGF4	THAP9	0.229713	7e-06	-0.47105	0.006505	-3.75474	0.000174	#ERROR!
KCNK3	THAP9	0.054356	0.29378	0.663856	3.44e-05	3.75455	0.000174	0/+
PTCH2	THAP9	0.24081	2.39e-06	0.757698	5.13e-07	3.75398	0.000174	#ERROR!
TDRD3	THAP9	0.606919	0	0.895528	4.52e-12	3.75389	0.000174	#ERROR!
PPP1R2	THAP9	0.493859	0	0.858138	3.43e-10	3.75363	0.000174	#ERROR!
KCNIP3	THAP9	0.196742	0.000126	0.737238	1.49e-06	3.7535	0.000174	#ERROR!
HSPA12A	THAP9	0.335591	2.53e-11	0.798387	4.38e-08	3.75336	0.000174	#ERROR!
LDLRAD3	THAP9	0.364818	3.01e-13	0.810117	1.94e-08	3.75289	0.000175	#ERROR!
CALD1	THAP9	0.191381	0.000193	0.734604	1.7e-06	3.75263	0.000175	#ERROR!
PDE1A	THAP9	0.192935	0.000171	0.735337	1.64e-06	3.75253	0.000175	#ERROR!
BORCS5	THAP9	0.46504	0	0.847874	9.11e-10	3.75228	0.000175	#ERROR!
GABPB2	THAP9	0.476349	0	0.851906	6.26e-10	3.75225	0.000175	#ERROR!
JAK1	THAP9	0.435849	0	0.837243	2.33e-09	3.75213	0.000175	#ERROR!
GATB	THAP9	0.440859	0	0.839076	1.99e-09	3.75193	0.000175	#ERROR!
DZIP1L	THAP9	0.167088	0.001163	0.722757	2.99e-06	3.75181	0.000176	#ERROR!
EXOG	THAP9	0.502921	0	0.861149	2.54e-10	3.75102	0.000176	#ERROR!
GNG7	THAP9	0.106439	0.039384	0.691779	1.16e-05	3.75076	0.000176	#ERROR!
NFATC2IP	THAP9	0.510234	0	0.863636	1.97e-10	3.75034	0.000177	#ERROR!
LPAR4	THAP9	0.08558	0.097976	0.680543	1.82e-05	3.74985	0.000177	0/+
ILDR2	THAP9	0.354348	1.55e-12	0.805683	2.65e-08	3.74914	0.000177	#ERROR!
SLC6A17	THAP9	0.087434	0.090887	0.681456	1.76e-05	3.74901	0.000178	0/+
ATF2	THAP9	0.66264	0	0.91239	3.62e-13	3.74867	0.000178	#ERROR!
MRPS17	THAP9	0.482298	0	0.853817	5.22e-10	3.74865	0.000178	#ERROR!
TCERG1	THAP9	0.661487	0	0.912023	3.85e-13	3.74801	0.000178	#ERROR!
PTPRQ	THAP9	0.139405	0.006856	0.708553	5.68e-06	3.74793	0.000178	#ERROR!
PRRG1	THAP9	0.351944	2.24e-12	0.804619	2.86e-08	3.74773	0.000178	#ERROR!
PEX3	THAP9	0.534413	0	0.871701	8.36e-11	3.74724	0.000179	#ERROR!
C1S	THAP9	0.059084	0.253729	0.665689	3.21e-05	3.7472	0.000179	0/+
HSF4	THAP9	0.445927	0	0.84062	1.74e-09	3.74653	0.000179	#ERROR!
LOC101929710	THAP9	0.165184	0.001326	0.721311	3.2e-06	3.74645	0.000179	#ERROR!
DPH1	THAP9	0.436843	0	0.837243	2.33e-09	3.74595	0.00018	#ERROR!
BRD7	THAP9	0.562322	0	0.880865	2.93e-11	3.7451	0.00018	#ERROR!
PRELID3A	THAP9	0.34646	5.14e-12	0.8022	3.38e-08	3.74483	0.000181	#ERROR!
MTSS2	THAP9	0.22595	9.95e-06	0.75	7.75e-07	3.74331	0.000182	#ERROR!
TATDN1P1	THAP9	0.374659	6.08e-14	0.813319	1.54e-08	3.74274	0.000182	#ERROR!
AGAP1-IT1	THAP9	0.126307	0.014382	-0.54824	0.00116	-3.74235	0.000182	#ERROR!
TNFAIP6	THAP9	0.027377	0.597169	0.646994	6.29e-05	3.74175	0.000183	0/+
AGMAT	THAP9	0.236081	3.8e-06	-0.46371	0.007515	-3.74134	0.000183	#ERROR!
ADHFE1	THAP9	0.187811	0.000255	0.731806	1.94e-06	3.74079	0.000183	#ERROR!
PARD6G	THAP9	0.327157	8.37e-11	0.793988	5.86e-08	3.74056	0.000184	#ERROR!
PCA3	THAP9	0.115421	0.025408	0.695386	9.98e-06	3.73996	0.000184	#ERROR!
HOXA3	THAP9	0.311222	7.26e-10	0.787279	9.03e-08	3.73978	0.000184	#ERROR!
TFB1M	THAP9	0.472318	0	0.849785	7.64e-10	3.73974	0.000184	#ERROR!
PDX1	THAP9	0.200868	8.97e-05	-0.49198	0.004236	-3.73961	0.000184	#ERROR!
PLSCR3	THAP9	0.285514	1.82e-08	0.77624	1.78e-07	3.73892	0.000185	#ERROR!
FBXO24	THAP9	0.33934	1.47e-11	0.798863	4.24e-08	3.73867	0.000185	#ERROR!
RAB3GAP2	THAP9	0.661409	0	0.911657	4.08e-13	3.73776	0.000186	#ERROR!
PITPNC1	THAP9	0.124347	0.015984	0.69978	8.3e-06	3.73746	0.000186	#ERROR!
METTL24	THAP9	0.123565	0.016665	0.699294	8.47e-06	3.73667	0.000186	#ERROR!
FAM87A	THAP9	0.298497	3.72e-09	0.78164	1.28e-07	3.73659	0.000187	#ERROR!
GLI2	THAP9	0.125512	0.015014	0.700147	8.17e-06	3.73511	0.000188	#ERROR!
PPM1K	THAP9	0.371773	9.77e-14	0.811584	1.74e-08	3.73392	0.000189	#ERROR!
AFAP1	THAP9	0.294512	6.11e-09	0.779692	1.45e-07	3.73348	0.000189	#ERROR!
CSAD	THAP9	0.521324	0	0.866569	1.45e-10	3.73295	0.000189	#ERROR!
STARD13	THAP9	0.315458	4.14e-10	0.78849	8.36e-08	3.7322	0.00019	#ERROR!
KLHL11	THAP9	0.578821	0	0.88563	1.64e-11	3.73105	0.000191	#ERROR!
LINC00672	THAP9	0.372206	9.1e-14	0.811555	1.75e-08	3.73095	0.000191	#ERROR!
HDDC2	THAP9	0.42071	0	0.830279	4.15e-09	3.73042	0.000191	#ERROR!
KDM4D	THAP9	0.515949	0	0.864533	1.8e-10	3.7291	0.000192	#ERROR!
OPA1	THAP9	0.641867	0	0.905425	1.09e-12	3.72898	0.000192	#ERROR!
MRPL42	THAP9	0.643077	0	0.905792	1.03e-12	3.72887	0.000192	#ERROR!
LOC112267983	THAP9	0.484148	0	0.85337	5.45e-10	3.7282	0.000193	#ERROR!
EFHD1	THAP9	0.148462	0.00396	0.711144	5.07e-06	3.72764	0.000193	#ERROR!
NFATC4	THAP9	0.213946	2.95e-05	0.743035	1.11e-06	3.72761	0.000193	#ERROR!
AMDHD1	THAP9	0.262437	2.53e-07	0.765178	3.39e-07	3.72733	0.000194	#ERROR!
SLC27A1	THAP9	0.261339	2.85e-07	0.764663	3.49e-07	3.72702	0.000194	#ERROR!
SORBS1	THAP9	0.245044	1.56e-06	0.757331	5.23e-07	3.72697	0.000194	#ERROR!
GPR88	THAP9	0.078075	0.131253	0.673941	2.35e-05	3.72647	0.000194	0/+
MGP	THAP9	0.019209	0.710803	0.640396	7.89e-05	3.72616	0.000194	0/+
ANKRD7	THAP9	0.122858	0.017302	0.697825	9.01e-06	3.72582	0.000195	#ERROR!
SLCO3A1	THAP9	0.24044	2.48e-06	0.755132	5.9e-07	3.72574	0.000195	#ERROR!
LUC7L	THAP9	0.556078	0	0.877933	4.14e-11	3.72569	0.000195	#ERROR!
PPP3CC	THAP9	0.362349	4.45e-13	0.807259	2.38e-08	3.7256	0.000195	#ERROR!
ARGLU1	THAP9	0.589772	0	0.88893	1.08e-11	3.72542	0.000195	#ERROR!
FBXO8	THAP9	0.48675	0	0.854106	5.08e-10	3.72471	0.000196	#ERROR!
GFRA1	THAP9	0.114335	0.026832	0.693182	1.09e-05	3.72407	0.000196	#ERROR!
NXN	THAP9	0.087637	0.090138	0.678886	1.94e-05	3.72389	0.000196	0/+
NPAT	THAP9	0.705423	0	0.924205	4.46e-14	3.7235	0.000196	#ERROR!
ELF2	THAP9	0.746321	0	0.93585	4e-15	3.72269	0.000197	#ERROR!
PRKD3	THAP9	0.504837	0	0.860337	2.76e-10	3.72229	0.000197	#ERROR!
SAV1	THAP9	0.390563	4e-15	0.818182	1.07e-08	3.72211	0.000198	#ERROR!
DNAJB5	THAP9	0.127359	0.013582	0.69978	8.3e-06	3.72204	0.000198	#ERROR!
PIGZ	THAP9	0.338604	1.64e-11	0.79736	4.69e-08	3.722	0.000198	#ERROR!
CDAN1	THAP9	0.598244	0	0.891496	7.76e-12	3.72175	0.000198	#ERROR!
MIEF2	THAP9	0.437782	0	0.836144	2.55e-09	3.72163	0.000198	#ERROR!
PTCD2	THAP9	0.651151	0	0.907991	7.33e-13	3.7213	0.000198	#ERROR!
ITGBL1	THAP9	0.095865	0.063668	0.682918	1.66e-05	3.71996	0.000199	0/+
MTX3	THAP9	0.581168	0	0.885895	1.59e-11	3.71942	0.0002	#ERROR!
CCDC144NL	THAP9	0.169389	0.000991	0.720798	3.27e-06	3.71928	0.0002	#ERROR!
CLEC14A	THAP9	0.118835	0.021351	0.694895	1.02e-05	3.71774	0.000201	#ERROR!
COMMD2	THAP9	0.616064	0	0.896975	3.71e-12	3.71736	0.000201	#ERROR!
CLIP3	THAP9	0.119885	0.020222	0.695381	9.99e-06	3.71711	0.000202	#ERROR!
KCNMB4	THAP9	0.199841	9.76e-05	0.735405	1.63e-06	3.71708	0.000202	#ERROR!
LYPD5	THAP9	0.117914	0.022387	0.694282	1.05e-05	3.71647	0.000202	#ERROR!
FAM120C	THAP9	0.490075	0	0.854839	4.74e-10	3.71639	0.000202	#ERROR!
KLRK1-AS1	THAP9	0.032298	0.532945	0.646924	6.31e-05	3.71633	0.000202	0/+
IRX1	THAP9	0.006718	0.896842	0.631765	0.000105	3.71607	0.000202	0/+
TIAL1	THAP9	0.649387	0	0.907258	8.21e-13	3.71573	0.000203	#ERROR!
SLC5A3	THAP9	0.528136	0	0.868035	1.24e-10	3.7154	0.000203	#ERROR!
SUV39H2	THAP9	0.585079	0	0.886974	1.39e-11	3.71494	0.000203	#ERROR!
LINC02175	THAP9	0.267537	1.44e-07	0.766408	3.16e-07	3.71468	0.000203	#ERROR!
ASCC1	THAP9	0.570846	0	0.88231	2.47e-11	3.71452	0.000204	#ERROR!
CASP12	THAP9	0.162038	0.001643	0.716688	3.95e-06	3.71452	0.000204	#ERROR!
SNAPIN	THAP9	0.326506	9.17e-11	0.791789	6.76e-08	3.71439	0.000204	#ERROR!
IPO5	THAP9	0.629529	0	0.901026	2.09e-12	3.71296	0.000205	#ERROR!
TRMT12	THAP9	0.416722	0	0.827605	5.15e-09	3.71173	0.000206	#ERROR!
SMIM13	THAP9	0.620438	0	0.898094	3.17e-12	3.71068	0.000207	#ERROR!
ESYT2	THAP9	0.4838	0	0.852273	6.05e-10	3.71021	0.000207	#ERROR!
PML	THAP9	0.188854	0.000235	0.729472	2.17e-06	3.71012	0.000207	#ERROR!
SLC2A4RG	THAP9	0.194168	0.000155	0.732038	1.92e-06	3.71007	0.000207	#ERROR!
FAM83E	THAP9	0.229253	7.31e-06	-0.46449	0.007402	-3.70995	0.000207	#ERROR!
ARHGEF26-AS1	THAP9	0.182341	0.000387	0.726273	2.53e-06	3.70982	0.000207	#ERROR!
OXR1	THAP9	0.606676	0	0.893695	5.8e-12	3.70959	0.000208	#ERROR!
CPSF3	THAP9	0.587552	0	0.887545	1.29e-11	3.70946	0.000208	#ERROR!
PAM16	THAP9	0.421339	0	0.829179	4.54e-09	3.70878	0.000208	#ERROR!
TSPAN9	THAP9	0.184614	0.000326	0.727273	2.42e-06	3.70865	0.000208	#ERROR!
LINC01119	THAP9	0.148933	0.003845	0.709489	5.45e-06	3.70839	0.000209	#ERROR!
TPPP3	THAP9	0.122081	0.018028	0.695628	9.88e-06	3.70829	0.000209	#ERROR!
LINC02884	THAP9	0.082736	0.109695	0.674511	2.3e-05	3.7081	0.000209	0/+
CNTN6	THAP9	0.113438	0.028058	0.691035	1.2e-05	3.70788	0.000209	#ERROR!
RPRD1A	THAP9	0.658456	0	0.909708	5.59e-13	3.70656	0.00021	#ERROR!
SOX2-OT	THAP9	0.241664	2.2e-06	0.754032	6.26e-07	3.70632	0.00021	#ERROR!
ADCY2	THAP9	0.164816	0.00136	0.717258	3.85e-06	3.70605	0.000211	#ERROR!
PLS1	THAP9	0.332488	3.95e-11	-0.37133	0.036395	-3.70581	0.000211	#ERROR!
SMARCD3	THAP9	0.146226	0.004547	0.707845	5.86e-06	3.70569	0.000211	#ERROR!
NOD1	THAP9	0.41705	0	0.827346	5.26e-09	3.70559	0.000211	#ERROR!
LIFR-AS1	THAP9	0.308904	9.84e-10	0.783685	1.13e-07	3.70542	0.000211	#ERROR!
HDHD2	THAP9	0.613814	0	0.895793	4.36e-12	3.70529	0.000211	#ERROR!
KCNB1	THAP9	0.093354	0.070965	0.679985	1.86e-05	3.70514	0.000211	0/+
ARHGEF26	THAP9	0.271184	9.6e-08	0.767229	3.01e-07	3.70491	0.000211	#ERROR!
SBF2	THAP9	0.601539	0	0.891862	7.4e-12	3.70483	0.000212	#ERROR!
ASPN	THAP9	0.11351	0.027958	0.690679	1.21e-05	3.70409	0.000212	#ERROR!
METTL2A	THAP9	0.516	0	0.86327	2.05e-10	3.70366	0.000213	#ERROR!
AMPH	THAP9	0.145105	0.00487	0.707058	6.07e-06	3.70352	0.000213	#ERROR!
TAF7	THAP9	0.425103	0	0.830279	4.15e-09	3.70347	0.000213	#ERROR!
COL6A3	THAP9	0.138831	0.007091	0.703812	6.99e-06	3.70323	0.000213	#ERROR!
TACR2	THAP9	0.02198	0.671373	0.639296	8.19e-05	3.70282	0.000213	0/+
DNM1L	THAP9	0.624984	0	0.899194	2.71e-12	3.70206	0.000214	#ERROR!
PITPNB	THAP9	0.591661	0	0.888563	1.13e-11	3.70201	0.000214	#ERROR!
CREG1	THAP9	0.443907	0	0.837243	2.33e-09	3.7018	0.000214	#ERROR!
CORO1C	THAP9	0.365431	2.73e-13	0.806818	2.45e-08	3.70134	0.000214	#ERROR!
MKX	THAP9	0.16507	0.001337	0.716891	3.91e-06	3.70093	0.000215	#ERROR!
TRPS1	THAP9	0.287143	1.5e-08	0.773827	2.05e-07	3.69953	0.000216	#ERROR!
ESD	THAP9	0.38999	4.44e-15	0.816349	1.23e-08	3.69771	0.000218	#ERROR!
BDNF-AS	THAP9	0.387328	7.11e-15	0.81529	1.33e-08	3.69756	0.000218	#ERROR!
DNAJB4	THAP9	0.301871	2.43e-09	0.780059	1.41e-07	3.6975	0.000218	#ERROR!
SRL	THAP9	0.10815	0.036307	0.687139	1.4e-05	3.69748	0.000218	#ERROR!
ADAM21P1	THAP9	0.081367	0.115714	0.672597	2.48e-05	3.6974	0.000218	0/+
SLC12A4	THAP9	0.323445	1.4e-10	0.789223	7.98e-08	3.69717	0.000218	#ERROR!
[truncated: 27,859 more rows]

## Sheet: THCA
Gene1	Gene2	TCGA_THCA.PrimarySolidTumor_cor	TCGA_THCA.PrimarySolidTumor_pVal	TCGA_THCA.SolidTissueNormal_cor	TCGA_THCA.SolidTissueNormal_pVal	zScoreDiff	pValDiff	Classes
PLRG1	THAP9	0.092978	0.037294	0.867354	0	8.4022	4.38e-17	#ERROR!
RAD1	THAP9	0.343706	2.22e-15	0.891319	0	7.315	2.57e-13	#ERROR!
DCBLD2	THAP9	0.035473	0.427746	0.799619	5.2e-14	7.26064	3.85e-13	0/+
STAM	THAP9	0.03403	0.446797	0.793841	1.06e-13	7.16238	7.93e-13	0/+
ITGA3	THAP9	-0.21757	8.58e-07	0.672481	7.42e-09	7.0849	1.39e-12	-/+
ETNK2	THAP9	-0.07421	0.096727	0.727955	9.51e-11	6.82755	8.64e-12	0/+
LAMP2	THAP9	0.287715	5.04e-11	0.859973	0	6.81698	9.3e-12	#ERROR!
ANXA3	THAP9	-0.11843	0.007902	0.698628	1.08e-09	6.72426	1.76e-11	-/+
MBOAT2	THAP9	-0.0373	0.404286	0.733235	5.94e-11	6.65182	2.89e-11	0/+
RAB18	THAP9	0.423929	0	0.890612	0	6.64768	2.98e-11	#ERROR!
MAL2	THAP9	0.149292	0.000792	0.806171	2.26e-14	6.60102	4.08e-11	#ERROR!
PERP	THAP9	-0.15064	0.000709	0.670973	8.24e-09	6.59235	4.33e-11	-/+
ERBB3	THAP9	-0.15002	0.000747	0.671035	8.21e-09	6.58873	4.44e-11	-/+
SGMS1	THAP9	0.08027	0.072354	0.778055	6.66e-13	6.56275	5.28e-11	0/+
DSG2	THAP9	0.198838	7.16e-06	0.820229	3.33e-15	6.5355	6.34e-11	#ERROR!
PLS3	THAP9	0.084666	0.058006	0.776147	8.23e-13	6.49957	8.06e-11	0/+
GULP1	THAP9	-0.05501	0.218534	0.706134	5.95e-10	6.38855	1.67e-10	0/+
MBIP	THAP9	0.438614	0	0.882121	0	6.25345	4.01e-10	#ERROR!
SYT14	THAP9	0.050001	0.263481	0.745924	1.83e-11	6.24609	4.21e-10	0/+
SLC17A5	THAP9	0.150005	0.000747	0.786914	2.42e-13	6.23563	4.5e-10	#ERROR!
ADK	THAP9	0.171961	0.000108	0.795281	8.88e-14	6.23442	4.53e-10	#ERROR!
PLEKHA3	THAP9	0.410351	0	0.872924	0	6.21561	5.11e-10	#ERROR!
LMBRD1	THAP9	0.375775	0	0.861217	0	6.17256	6.72e-10	#ERROR!
LACTB2	THAP9	0.131278	0.003211	0.775248	9.09e-13	6.16166	7.2e-10	#ERROR!
FZD1	THAP9	0.206707	3.01e-06	0.803956	3e-14	6.1525	7.63e-10	#ERROR!
MYO1D	THAP9	0.025383	0.570454	0.728405	9.14e-11	6.15225	7.64e-10	0/+
C12orf29	THAP9	0.538431	0	0.90427	0	6.10633	1.02e-09	#ERROR!
NDFIP2	THAP9	0.31505	4.97e-13	0.839345	2.22e-16	6.10356	1.04e-09	#ERROR!
AMOT	THAP9	-0.10748	0.015994	0.652711	2.82e-08	6.07	1.28e-09	-/+
EXOC6B	THAP9	0.135286	0.002385	0.771164	1.42e-12	6.06434	1.32e-09	#ERROR!
FAM3C	THAP9	0.181526	4.29e-05	0.789221	1.85e-13	6.05565	1.4e-09	#ERROR!
ARL8B	THAP9	0.314941	5.07e-13	0.837179	2.22e-16	6.05457	1.41e-09	#ERROR!
DERA	THAP9	0.265716	1.47e-09	0.819349	3.77e-15	6.03366	1.6e-09	#ERROR!
NMD3	THAP9	0.370443	0	0.85408	0	6.03038	1.64e-09	#ERROR!
MAGI2-AS3	THAP9	0.099515	0.025771	0.752861	9.35e-12	6.0138	1.81e-09	#ERROR!
BEND6	THAP9	-0.25525	6.59e-09	0.549766	7.83e-06	6.00963	1.86e-09	-/+
CHML	THAP9	0.347158	1.11e-15	0.844095	0	5.9684	2.4e-09	#ERROR!
DNAJC21	THAP9	0.256001	5.93e-09	0.811708	1.09e-14	5.94893	2.7e-09	#ERROR!
HEXB	THAP9	0.121152	0.006574	0.757567	5.85e-12	5.93895	2.87e-09	#ERROR!
PTPRU	THAP9	-0.12855	0.003915	0.625569	1.52e-07	5.90226	3.59e-09	-/+
KCNJ2-AS1	THAP9	0.048807	0.27507	0.720976	1.74e-10	5.88492	3.98e-09	0/+
SGK3	THAP9	0.055271	0.216372	0.721269	1.7e-10	5.84477	5.07e-09	0/+
LEPROT	THAP9	0.349714	6.66e-16	0.838809	2.22e-16	5.82472	5.72e-09	#ERROR!
PARVA	THAP9	0.142532	0.001365	0.75806	5.57e-12	5.79809	6.71e-09	#ERROR!
TMEM237	THAP9	0.239152	5.83e-08	0.797219	7.02e-14	5.79079	7.01e-09	#ERROR!
GPN3	THAP9	0.365165	0	0.842483	0	5.78925	7.07e-09	#ERROR!
PON2	THAP9	0.112825	0.011417	0.742709	2.49e-11	5.76432	8.2e-09	#ERROR!
KDSR	THAP9	0.387316	0	0.848745	0	5.7631	8.26e-09	#ERROR!
FZD6	THAP9	0.337175	8.22e-15	0.831654	6.66e-16	5.76014	8.4e-09	#ERROR!
CLDN12	THAP9	0.343532	2.22e-15	0.831795	6.66e-16	5.71411	1.1e-08	#ERROR!
PAIP1	THAP9	0.452431	0	0.86714	0	5.69934	1.2e-08	#ERROR!
TMCC3	THAP9	-0.04722	0.291042	0.6559	2.29e-08	5.69355	1.24e-08	0/+
OSGIN2	THAP9	0.128939	0.003806	0.745201	1.96e-11	5.69067	1.27e-08	#ERROR!
GPHN	THAP9	0.362348	0	0.83724	2.22e-16	5.68979	1.27e-08	#ERROR!
KLHL32	THAP9	0.167855	0.000158	0.762018	3.72e-12	5.68476	1.31e-08	#ERROR!
CDKAL1	THAP9	0.32449	8.99e-14	0.823679	2e-15	5.68438	1.31e-08	#ERROR!
PRPS2	THAP9	0.244532	2.86e-08	0.793066	1.16e-13	5.67453	1.39e-08	#ERROR!
PSG1	THAP9	-0.33746	7.77e-15	0.440942	0.000531	5.63742	1.73e-08	-/+
CCDC74A	THAP9	-0.04036	0.366836	0.653613	2.66e-08	5.61923	1.92e-08	0/+
SLC25A21	THAP9	0.455647	0	0.865222	0	5.61912	1.92e-08	#ERROR!
DSC2	THAP9	-0.18316	3.65e-05	0.561194	4.59e-06	5.6046	2.09e-08	-/+
MORF4L1	THAP9	0.403932	0	0.847576	0	5.59994	2.14e-08	#ERROR!
ACVR1	THAP9	0.168306	0.000151	0.75686	6.28e-12	5.59828	2.16e-08	#ERROR!
IL20RA	THAP9	0.004371	0.922177	0.676224	5.69e-09	5.59044	2.27e-08	0/+
RPRD1A	THAP9	0.398128	0	0.845084	0	5.58719	2.31e-08	#ERROR!
QSOX1	THAP9	-0.19702	8.71e-06	0.548889	8.15e-06	5.58134	2.39e-08	-/+
DUSP11	THAP9	0.386347	0	0.84025	0	5.56836	2.57e-08	#ERROR!
APH1A	THAP9	0.291707	2.65e-11	0.805709	2.4e-14	5.56646	2.6e-08	#ERROR!
COL8A1	THAP9	-0.04484	0.315982	0.645257	4.55e-08	5.55113	2.84e-08	0/+
RAD23B	THAP9	0.145421	0.001085	0.743232	2.37e-11	5.54566	2.93e-08	#ERROR!
THRB	THAP9	0.142911	0.001325	0.741583	2.76e-11	5.53806	3.06e-08	#ERROR!
CNBP	THAP9	0.456235	0	0.861911	0	5.52502	3.29e-08	#ERROR!
CCNY	THAP9	0.510269	0	0.878474	0	5.50975	3.59e-08	#ERROR!
GALNT12	THAP9	0.242789	3.61e-08	0.782939	3.83e-13	5.50452	3.7e-08	#ERROR!
NCKAP1	THAP9	0.416177	0	0.847576	0	5.49931	3.81e-08	#ERROR!
MAPK13	THAP9	0.053295	0.233278	0.694721	1.45e-09	5.49423	3.92e-08	0/+
ATP6V1FNB	THAP9	-0.10569	0.017846	0.602563	5.6e-07	5.4913	3.99e-08	-/+
LAPTM4A	THAP9	0.386478	0	0.835992	4.44e-16	5.46948	4.51e-08	#ERROR!
SMIM3	THAP9	-0.04907	0.272506	0.634977	8.63e-08	5.461	4.73e-08	0/+
CASD1	THAP9	0.503278	0	0.87426	0	5.44986	5.04e-08	#ERROR!
SLC11A2	THAP9	0.538771	0	0.884828	0	5.436	5.45e-08	#ERROR!
TFAP2C	THAP9	-0.15867	0.000359	0.560818	4.68e-06	5.42836	5.69e-08	-/+
CORIN	THAP9	-0.03264	0.465641	0.640861	6e-08	5.41631	6.08e-08	0/+
DESI2	THAP9	0.519729	0	0.877999	0	5.40754	6.39e-08	#ERROR!
MMADHC	THAP9	0.5038	0	0.872462	0	5.39327	6.92e-08	#ERROR!
LRCH2	THAP9	0.11377	0.010742	0.717742	2.29e-10	5.39187	6.97e-08	#ERROR!
P2RY2	THAP9	0.046874	0.29455	0.682468	3.63e-09	5.37891	7.49e-08	0/+
PGRMC1	THAP9	0.509321	0	0.872862	0	5.35397	8.6e-08	#ERROR!
GTDC1	THAP9	0.470541	0	0.860046	0	5.35117	8.74e-08	#ERROR!
MORC4	THAP9	0.206638	3.03e-06	0.758102	5.54e-12	5.34657	8.96e-08	#ERROR!
ANKRD28	THAP9	0.439222	0	0.849176	0	5.34549	9.02e-08	#ERROR!
MET	THAP9	-0.13126	0.003215	0.571367	2.81e-06	5.3431	9.14e-08	-/+
PTPRF	THAP9	0.042889	0.33756	0.677402	5.24e-09	5.3418	9.2e-08	0/+
CREG1	THAP9	0.475803	0	0.861309	0	5.33815	9.39e-08	#ERROR!
ADSS2	THAP9	0.246436	2.22e-08	0.774529	9.84e-13	5.3319	9.72e-08	#ERROR!
IFIT5	THAP9	-0.08997	0.04391	0.597453	7.38e-07	5.32821	9.92e-08	-/+
RRAGB	THAP9	0.598877	0	0.899686	0	5.32672	1e-07	#ERROR!
NALCN	THAP9	-0.11726	0.008544	0.579242	1.9e-06	5.32635	1e-07	-/+
NET1	THAP9	0.058136	0.193461	0.683955	3.26e-09	5.32076	1.03e-07	0/+
CAPN2	THAP9	0.093938	0.035367	0.702166	8.15e-10	5.31419	1.07e-07	#ERROR!
LRATD2	THAP9	0.114696	0.010114	0.711631	3.81e-10	5.30007	1.16e-07	#ERROR!
BCL2L1	THAP9	-0.20537	3.49e-06	0.513043	3.82e-05	5.29941	1.16e-07	-/+
SDC4	THAP9	-0.12423	0.005316	0.56986	3.03e-06	5.27894	1.3e-07	-/+
TMEM117	THAP9	0.023677	0.59664	0.661288	1.6e-08	5.27368	1.34e-07	0/+
ANXA4	THAP9	0.205207	3.56e-06	0.752503	9.69e-12	5.26767	1.38e-07	#ERROR!
ADIPOR1	THAP9	0.375419	0	0.82269	2.22e-15	5.26649	1.39e-07	#ERROR!
POLR1F	THAP9	0.593479	0	0.895978	0	5.2532	1.49e-07	#ERROR!
TMEM144	THAP9	0.472933	0	0.856958	0	5.24989	1.52e-07	#ERROR!
CAPZA2	THAP9	0.37006	0	0.819639	3.55e-15	5.245	1.56e-07	#ERROR!
TMEM30A	THAP9	0.504621	0	0.867448	0	5.24477	1.56e-07	#ERROR!
LOX	THAP9	-0.26549	1.52e-09	0.457225	0.000308	5.23527	1.65e-07	-/+
TGFA	THAP9	0.062228	0.163885	0.679269	4.58e-09	5.23286	1.67e-07	0/+
LMO7	THAP9	0.249165	1.53e-08	0.769749	1.65e-12	5.23109	1.69e-07	#ERROR!
HS2ST1	THAP9	0.320061	2.02e-13	0.798911	5.68e-14	5.22214	1.77e-07	#ERROR!
MACC1	THAP9	-0.21168	1.71e-06	0.498693	6.77e-05	5.21265	1.86e-07	-/+
LAMP1	THAP9	0.288922	4.15e-11	0.785314	2.92e-13	5.20723	1.92e-07	#ERROR!
IGSF9	THAP9	-0.08995	0.043959	0.585273	1.4e-06	5.20001	1.99e-07	-/+
NAE1	THAP9	0.492147	0	0.861089	0	5.18641	2.14e-07	#ERROR!
ATAD1	THAP9	0.539681	0	0.87669	0	5.17905	2.23e-07	#ERROR!
CAMLG	THAP9	0.295072	1.53e-11	0.785696	2.79e-13	5.16807	2.37e-07	#ERROR!
PARD3	THAP9	0.186285	2.67e-05	0.737203	4.14e-11	5.16718	2.38e-07	#ERROR!
GDF7	THAP9	0.474161	0	-0.23512	0.075628	-5.16162	2.45e-07	#ERROR!
OPN3	THAP9	0.168179	0.000153	0.727951	9.51e-11	5.15844	2.49e-07	#ERROR!
SNX5	THAP9	0.453458	0	0.846469	0	5.15814	2.49e-07	#ERROR!
CD55	THAP9	-0.2047	3.76e-06	0.498	6.96e-05	5.15649	2.52e-07	-/+
BBS9	THAP9	0.334088	1.49e-14	0.801089	4.31e-14	5.15612	2.52e-07	#ERROR!
CPE	THAP9	0.367093	0	0.813769	8.22e-15	5.14795	2.63e-07	#ERROR!
MYH10	THAP9	0.05498	0.21881	0.668112	1.01e-08	5.14292	2.71e-07	0/+
MGAT4B	THAP9	-0.06158	0.168336	0.597853	7.22e-07	5.13721	2.79e-07	0/+
METTL9	THAP9	0.374096	0	0.815861	6.22e-15	5.13501	2.82e-07	#ERROR!
ARMCX3	THAP9	0.075524	0.090965	0.678736	4.76e-09	5.13476	2.82e-07	0/+
ARHGAP44	THAP9	0.131364	0.003191	0.707887	5.16e-10	5.13279	2.85e-07	#ERROR!
SGMS2	THAP9	0.043573	0.32991	0.660494	1.69e-08	5.12786	2.93e-07	0/+
ADGRF1	THAP9	-0.09164	0.04012	0.576166	2.22e-06	5.11772	3.09e-07	-/+
CHMP2B	THAP9	0.453561	0	0.844759	0	5.11623	3.12e-07	#ERROR!
LYNX1	THAP9	-0.2131	1.45e-06	0.486434	0.000108	5.11218	3.18e-07	-/+
PRSS12	THAP9	-0.03945	0.377703	0.609531	3.81e-07	5.11119	3.2e-07	0/+
TENM3	THAP9	0.077031	0.084677	0.677526	5.19e-09	5.10908	3.24e-07	0/+
ATP6V1C1	THAP9	0.548903	0	0.877305	0	5.10769	3.26e-07	#ERROR!
MBTPS2	THAP9	0.392397	0	0.821497	2.66e-15	5.10521	3.3e-07	#ERROR!
RNF2	THAP9	0.509125	0	0.863603	0	5.09854	3.42e-07	#ERROR!
SC5D	THAP9	0.354614	2.22e-16	0.806245	2.22e-14	5.09645	3.46e-07	#ERROR!
IDS	THAP9	0.047879	0.284312	0.660217	1.72e-08	5.09501	3.49e-07	0/+
C3orf38	THAP9	0.479339	0	0.853012	0	5.09295	3.53e-07	#ERROR!
PTPRM	THAP9	0.335867	1.07e-14	0.798431	6.04e-14	5.092	3.54e-07	#ERROR!
PAM	THAP9	0.079796	0.074059	0.676603	5.54e-09	5.07841	3.81e-07	0/+
GLO1	THAP9	0.517027	0	0.865479	0	5.07601	3.85e-07	#ERROR!
DHX32	THAP9	0.322979	1.19e-13	0.792205	1.29e-13	5.075	3.88e-07	#ERROR!
EHF	THAP9	-0.14644	0.001	0.532054	1.72e-05	5.06236	4.14e-07	-/+
RSL24D1	THAP9	0.430157	0	0.833764	4.44e-16	5.06074	4.18e-07	#ERROR!
ST13	THAP9	0.40645	0	0.824412	1.78e-15	5.05264	4.36e-07	#ERROR!
ALCAM	THAP9	0.263125	2.14e-09	0.764243	2.95e-12	5.03753	4.72e-07	#ERROR!
PPL	THAP9	-0.1044	0.019297	0.559247	5.04e-06	5.03511	4.78e-07	-/+
CTF1	THAP9	0.064171	0.151096	0.663129	1.41e-08	5.01869	5.2e-07	0/+
LOC388282	THAP9	0.022271	0.618621	0.638946	6.76e-08	5.01867	5.2e-07	0/+
BCL2L13	THAP9	0.395978	0	0.818688	4e-15	5.01757	5.23e-07	#ERROR!
POLR3C	THAP9	0.22236	4.83e-07	0.742936	2.43e-11	4.99643	5.84e-07	#ERROR!
GALNT7	THAP9	0.118023	0.008121	0.690518	2e-09	4.99305	5.94e-07	#ERROR!
MARVELD3	THAP9	0.117293	0.008525	0.688384	2.35e-09	4.97032	6.68e-07	#ERROR!
CAND1	THAP9	0.279551	1.83e-10	0.76738	2.12e-12	4.96817	6.76e-07	#ERROR!
SLC1A2	THAP9	0.458965	0	-0.22648	0.087345	-4.96644	6.82e-07	#ERROR!
RAD18	THAP9	0.23196	1.47e-07	0.745113	1.98e-11	4.96056	7.03e-07	#ERROR!
NIBAN2	THAP9	-0.03676	0.411126	0.59693	7.59e-07	4.95733	7.15e-07	0/+
RAD51B	THAP9	0.194874	1.09e-05	0.727083	1.03e-10	4.95711	7.15e-07	#ERROR!
GLMP	THAP9	0.037191	0.405694	0.642334	5.47e-08	4.95586	7.2e-07	0/+
RNF139	THAP9	0.221823	5.16e-07	0.739706	3.29e-11	4.95127	7.37e-07	#ERROR!
AMMECR1	THAP9	0.353008	4.44e-16	0.79784	6.48e-14	4.94792	7.5e-07	#ERROR!
F2RL1	THAP9	0.138998	0.001798	0.697951	1.13e-09	4.94535	7.6e-07	#ERROR!
FBXO28	THAP9	0.451842	0	0.836592	4.44e-16	4.94058	7.79e-07	#ERROR!
RARS1	THAP9	0.400334	0	0.816537	5.55e-15	4.93783	7.9e-07	#ERROR!
COL11A1	THAP9	-0.31274	7.49e-13	0.378285	0.003413	4.93332	8.08e-07	-/+
PRPF18	THAP9	0.231958	1.47e-07	0.742732	2.48e-11	4.92413	8.47e-07	#ERROR!
NPTN	THAP9	0.533521	0	0.865325	0	4.91608	8.83e-07	#ERROR!
GSTCD	THAP9	0.326231	6.53e-14	0.784634	3.16e-13	4.91336	8.95e-07	#ERROR!
MFSD14A	THAP9	0.472528	0	0.842913	0	4.90735	9.23e-07	#ERROR!
CD46	THAP9	0.378649	0	0.805832	2.35e-14	4.89855	9.65e-07	#ERROR!
TATDN3	THAP9	0.570821	0	0.877517	0	4.89568	9.8e-07	#ERROR!
CTTN	THAP9	0.092473	0.038344	0.668697	9.65e-09	4.89239	9.96e-07	#ERROR!
API5	THAP9	0.464754	0	0.839332	2.22e-16	4.89175	9.99e-07	#ERROR!
EHBP1	THAP9	0.075672	0.090331	0.65871	1.9e-08	4.88603	1.03e-06	0/+
FAF1	THAP9	0.395597	0	0.812046	1.02e-14	4.88518	1.03e-06	#ERROR!
SSX2IP	THAP9	0.376236	0	0.803907	3.02e-14	4.88041	1.06e-06	#ERROR!
REPS1	THAP9	0.431719	0	0.825563	1.55e-15	4.8677	1.13e-06	#ERROR!
SNIP1	THAP9	0.494584	0	0.849219	0	4.86226	1.16e-06	#ERROR!
SPINT1	THAP9	-0.21494	1.17e-06	0.455495	0.000327	4.85347	1.21e-06	-/+
SPRING1	THAP9	0.225472	3.31e-07	0.734804	5.16e-11	4.85159	1.22e-06	#ERROR!
NCSTN	THAP9	0.43009	0	0.824148	1.78e-15	4.85112	1.23e-06	#ERROR!
NPM1	THAP9	0.277787	2.4e-10	0.75929	4.91e-12	4.8487	1.24e-06	#ERROR!
ITGB8	THAP9	-0.02134	0.633411	0.596595	7.72e-07	4.84822	1.25e-06	0/+
RASA1	THAP9	0.163115	0.000242	0.703161	7.54e-10	4.84656	1.26e-06	#ERROR!
LRP11	THAP9	0.401488	0	0.812169	1.02e-14	4.83977	1.3e-06	#ERROR!
ARHGAP10	THAP9	-0.02612	0.559346	0.59207	9.82e-07	4.83309	1.34e-06	0/+
SNX7	THAP9	0.154868	0.000497	0.697564	1.17e-09	4.82929	1.37e-06	#ERROR!
DAG1	THAP9	0.330248	3.06e-14	0.781469	4.53e-13	4.82664	1.39e-06	#ERROR!
COL10A1	THAP9	-0.27969	1.79e-10	0.395003	0.002151	4.82001	1.44e-06	-/+
B4GALT6	THAP9	0.299464	7.35e-12	0.766531	2.32e-12	4.80547	1.54e-06	#ERROR!
FAM111A-DT	THAP9	-0.08925	0.045643	0.546506	9.08e-06	4.80509	1.55e-06	-/+
SCEL	THAP9	-0.15903	0.000347	0.49457	7.94e-05	4.80243	1.57e-06	-/+
BAG5	THAP9	0.42873	0	0.821275	2.89e-15	4.80172	1.57e-06	#ERROR!
BTF3L4	THAP9	0.631378	0	0.894857	0	4.79967	1.59e-06	#ERROR!
PEX19	THAP9	0.471315	0	0.837807	2.22e-16	4.79918	1.59e-06	#ERROR!
BLOC1S6	THAP9	0.546797	0	0.865725	0	4.79882	1.6e-06	#ERROR!
ANXA7	THAP9	0.391943	0	0.806171	2.26e-14	4.79843	1.6e-06	#ERROR!
AP3S1	THAP9	0.16387	0.000227	0.699869	9.77e-10	4.79695	1.61e-06	#ERROR!
APLP2	THAP9	0.358037	0	0.791405	1.42e-13	4.78919	1.67e-06	#ERROR!
SRFBP1	THAP9	0.377101	0	0.799446	5.33e-14	4.78817	1.68e-06	#ERROR!
ITFG1	THAP9	0.583426	0	0.87763	0	4.76984	1.84e-06	#ERROR!
PACSIN3	THAP9	0.054218	0.225266	0.63612	8.05e-08	4.76738	1.87e-06	0/+
ELP2	THAP9	0.395179	0	0.805863	2.35e-14	4.76625	1.88e-06	#ERROR!
RAB12	THAP9	0.325235	7.84e-14	0.775775	8.58e-13	4.76616	1.88e-06	#ERROR!
MUC15	THAP9	0.222905	4.53e-07	0.727359	1e-10	4.76074	1.93e-06	#ERROR!
GRB7	THAP9	-0.19592	9.8e-06	0.459602	0.000284	4.75323	2e-06	-/+
TFAM	THAP9	0.592043	0	0.879968	0	4.75003	2.03e-06	#ERROR!
IL36RN	THAP9	-0.27184	5.93e-10	0.393477	0.002245	4.74957	2.04e-06	-/+
CNTN6	THAP9	0.146246	0.001015	0.686098	2.78e-09	4.73926	2.15e-06	#ERROR!
CHPT1	THAP9	0.149743	0.000764	0.687892	2.44e-09	4.73804	2.16e-06	#ERROR!
PYGL	THAP9	-0.09262	0.038026	0.537015	1.39e-05	4.7365	2.17e-06	-/+
CD276	THAP9	-0.10191	0.022394	0.5303	1.86e-05	4.73642	2.18e-06	-/+
TBC1D15	THAP9	0.523384	0	0.854743	0	4.73424	2.2e-06	#ERROR!
TMEM43	THAP9	0.069018	0.122499	0.641873	5.63e-08	4.73228	2.22e-06	0/+
MEAF6	THAP9	0.249956	1.37e-08	0.73861	3.64e-11	4.73108	2.23e-06	#ERROR!
PLS1	THAP9	0.228302	2.33e-07	0.727659	9.76e-11	4.72621	2.29e-06	#ERROR!
CDK5RAP2	THAP9	0.073363	0.100624	0.643903	4.96e-08	4.72609	2.29e-06	0/+
MGST1	THAP9	0.122103	0.006159	0.671753	7.81e-09	4.72538	2.3e-06	#ERROR!
PROSER2	THAP9	0.004864	0.913428	0.601821	5.83e-07	4.72482	2.3e-06	0/+
CDIN1	THAP9	0.516619	0	0.851779	0	4.7231	2.32e-06	#ERROR!
FGD5-AS1	THAP9	0.454304	0	0.827735	1.11e-15	4.72246	2.33e-06	#ERROR!
SQSTM1	THAP9	0.169187	0.00014	0.696567	1.26e-09	4.71551	2.41e-06	#ERROR!
CCDC148	THAP9	0.144722	0.001148	0.683187	3.45e-09	4.71244	2.45e-06	#ERROR!
LRRC4	THAP9	0.385992	0	-0.27477	0.036856	-4.71087	2.47e-06	#ERROR!
MAP2	THAP9	0.019297	0.666239	0.609582	3.8e-07	4.70995	2.48e-06	0/+
ADORA2A	THAP9	0.242658	3.68e-08	-0.41338	0.001259	-4.69845	2.62e-06	#ERROR!
GOLT1B	THAP9	0.486778	0	0.839345	2.22e-16	4.6974	2.63e-06	#ERROR!
CFAP97	THAP9	0.481081	0	0.837117	2.22e-16	4.69705	2.64e-06	#ERROR!
AKT3	THAP9	0.256679	5.39e-09	0.739295	3.42e-11	4.69228	2.7e-06	#ERROR!
SSPN	THAP9	0.213483	1.39e-06	0.717823	2.28e-10	4.69193	2.71e-06	#ERROR!
PC	THAP9	-0.03995	0.37174	0.569108	3.14e-06	4.69092	2.72e-06	0/+
STEAP2	THAP9	0.267974	1.05e-09	0.744117	2.18e-11	4.68263	2.83e-06	#ERROR!
SLC39A6	THAP9	0.376917	0	0.793559	1.1e-13	4.67954	2.88e-06	#ERROR!
NARS2	THAP9	0.449887	0	0.823915	2e-15	4.6783	2.89e-06	#ERROR!
PDE5A	THAP9	-0.04149	0.353626	0.566331	3.59e-06	4.67342	2.96e-06	0/+
CDSN	THAP9	-0.23071	1.72e-07	0.42063	0.00101	4.67194	2.98e-06	-/+
PITPNC1	THAP9	0.372739	0	-0.28357	0.031002	-4.67028	3.01e-06	#ERROR!
KCP	THAP9	-0.15236	0.000615	0.484676	0.000116	4.66668	3.06e-06	-/+
NUDT11	THAP9	-0.02109	0.637348	0.579316	1.89e-06	4.66598	3.07e-06	0/+
TBC1D23	THAP9	0.439975	0	0.818949	4e-15	4.65842	3.19e-06	#ERROR!
RAB14	THAP9	0.46596	0	0.829396	8.88e-16	4.6576	3.2e-06	#ERROR!
HTATSF1	THAP9	0.492176	0	0.839578	2.22e-16	4.65427	3.25e-06	#ERROR!
JPH1	THAP9	0.15589	0.000456	0.684479	3.14e-09	4.65092	3.3e-06	#ERROR!
HTR2A	THAP9	-0.1445	0.001168	0.488802	9.89e-05	4.64872	3.34e-06	-/+
PPT1	THAP9	0.147975	0.000883	0.679771	4.42e-09	4.64611	3.38e-06	#ERROR!
FLRT3	THAP9	0.074822	0.094016	0.637514	7.39e-08	4.64196	3.45e-06	0/+
NPAS3	THAP9	0.307749	1.79e-12	0.760252	4.46e-12	4.64021	3.48e-06	#ERROR!
RBM7	THAP9	0.347978	8.88e-16	0.778528	6.32e-13	4.63833	3.51e-06	#ERROR!
MYH14	THAP9	0.04793	0.283799	0.62077	2.01e-07	4.63703	3.53e-06	0/+
NPPC	THAP9	0.297931	9.49e-12	-0.35467	0.0063	-4.63521	3.57e-06	#ERROR!
GLS2	THAP9	0.100286	0.024639	0.651566	3.04e-08	4.63087	3.64e-06	#ERROR!
BTG3	THAP9	0.015544	0.728275	0.599483	6.61e-07	4.6268	3.71e-06	0/+
SUGCT	THAP9	-0.08674	0.052107	0.529637	1.91e-05	4.62546	3.74e-06	0/+
FBXO7	THAP9	0.419078	0	0.808386	1.69e-14	4.61986	3.84e-06	#ERROR!
PTK7	THAP9	0.292902	2.18e-11	0.751969	1.02e-11	4.61954	3.85e-06	#ERROR!
RRM2B	THAP9	0.383642	0	0.792974	1.18e-13	4.61501	3.93e-06	#ERROR!
HDAC2	THAP9	0.4461	0	0.819368	3.77e-15	4.61501	3.93e-06	#ERROR!
SLC29A1	THAP9	0.142092	0.001413	0.673127	7.09e-09	4.60345	4.16e-06	#ERROR!
CFTR	THAP9	-0.14324	0.001291	0.484719	0.000115	4.60337	4.16e-06	-/+
FLG-AS1	THAP9	0.157283	0.000404	0.681013	4.04e-09	4.59676	4.29e-06	#ERROR!
MACROD2	THAP9	0.113032	0.011266	0.65591	2.29e-08	4.59459	4.34e-06	#ERROR!
GPN1	THAP9	0.245243	2.6e-08	0.726971	1.04e-10	4.59353	4.36e-06	#ERROR!
SLC30A5	THAP9	0.591885	0	0.874554	0	4.59103	4.41e-06	#ERROR!
ELOVL6	THAP9	0.099882	0.025227	0.647941	3.84e-08	4.59078	4.42e-06	#ERROR!
POGK	THAP9	0.394574	0	0.796019	8.13e-14	4.5834	4.57e-06	#ERROR!
RNF115	THAP9	0.451961	0	0.820137	3.55e-15	4.58084	4.63e-06	#ERROR!
MICU1	THAP9	0.262859	2.23e-09	0.734835	5.14e-11	4.58021	4.65e-06	#ERROR!
GLB1	THAP9	0.390807	0	0.794174	1.02e-13	4.57954	4.66e-06	#ERROR!
SVIP	THAP9	0.454656	0	0.821121	3.11e-15	4.57826	4.69e-06	#ERROR!
BTBD1	THAP9	0.360444	0	0.780608	5e-13	4.57712	4.71e-06	#ERROR!
DYNLT3	THAP9	0.286357	6.26e-11	0.746063	1.81e-11	4.5764	4.73e-06	#ERROR!
HINT3	THAP9	0.419488	0	0.806079	2.26e-14	4.57118	4.85e-06	#ERROR!
RRAS2	THAP9	0.508678	0	0.842452	0	4.57088	4.86e-06	#ERROR!
MRPL45	THAP9	0.429876	0	0.810354	1.29e-14	4.56883	4.9e-06	#ERROR!
ACTR6	THAP9	0.510304	0	0.842975	0	4.56821	4.92e-06	#ERROR!
RBM15B	THAP9	0.407035	0	0.80048	4.66e-14	4.56596	4.97e-06	#ERROR!
DST	THAP9	-0.08684	0.051833	0.522948	2.54e-05	4.56291	5.04e-06	0/+
KLF5	THAP9	0.187859	2.27e-05	0.694655	1.46e-09	4.55833	5.16e-06	#ERROR!
SOWAHB	THAP9	0.045701	0.30681	0.611643	3.39e-07	4.5517	5.32e-06	0/+
SLC25A24	THAP9	0.356089	2.22e-16	0.776956	7.53e-13	4.54783	5.42e-06	#ERROR!
MARCHF5	THAP9	0.53273	0	0.850788	0	4.54651	5.45e-06	#ERROR!
SUCLG2	THAP9	0.455262	0	0.819685	3.55e-15	4.54302	5.55e-06	#ERROR!
GET1	THAP9	0.51096	0	0.842144	0	4.54256	5.56e-06	#ERROR!
SULF1	THAP9	0.042839	0.338124	0.608989	3.93e-07	4.54238	5.56e-06	0/+
ATP6V1G1	THAP9	0.455276	0	0.819644	3.55e-15	4.54205	5.57e-06	#ERROR!
COBL	THAP9	0.216368	9.89e-07	0.708533	4.9e-10	4.54199	5.57e-06	#ERROR!
RASGRP3	THAP9	0.537127	0	-0.0638	0.634223	-4.5393	5.64e-06	#ERROR!
SH2B2	THAP9	0.313524	6.52e-13	-0.32658	0.012348	-4.53554	5.75e-06	#ERROR!
PGRMC2	THAP9	0.410394	0	0.800326	4.75e-14	4.53546	5.75e-06	#ERROR!
SCARB2	THAP9	0.407214	0	0.798942	5.66e-14	4.53532	5.75e-06	#ERROR!
AHCYL1	THAP9	0.47453	0	0.827181	1.33e-15	4.53415	5.78e-06	#ERROR!
NUP54	THAP9	0.608271	0	0.878505	0	4.53254	5.83e-06	#ERROR!
HDGF	THAP9	0.257262	4.96e-09	0.728621	8.97e-11	4.5298	5.9e-06	#ERROR!
DEGS1	THAP9	0.172731	0.0001	0.684232	3.19e-09	4.5294	5.92e-06	#ERROR!
P2RY8	THAP9	0.390503	0	-0.24492	0.06388	-4.52839	5.94e-06	#ERROR!
POC1B	THAP9	0.445597	0	0.814901	7.11e-15	4.52741	5.97e-06	#ERROR!
SHF	THAP9	0.012419	0.781346	0.588043	1.21e-06	4.52736	5.97e-06	0/+
CST6	THAP9	-0.34064	4.22e-15	0.297839	0.023165	4.52544	6.03e-06	-/+
AHNAK2	THAP9	-0.27604	3.14e-10	0.361301	0.005328	4.52408	6.07e-06	-/+
KCND2	THAP9	-0.16415	0.000221	0.458189	0.000298	4.51653	6.29e-06	-/+
LRP12	THAP9	0.376303	0	0.784228	3.31e-13	4.51549	6.32e-06	#ERROR!
S100A2	THAP9	-0.34071	4e-15	0.296095	0.024023	4.51283	6.4e-06	-/+
OLA1	THAP9	0.447196	0	0.814581	7.33e-15	4.50725	6.57e-06	#ERROR!
GMCL1	THAP9	0.442361	0	0.812336	9.99e-15	4.50307	6.7e-06	#ERROR!
PRSS3	THAP9	-0.18947	1.93e-05	0.435561	0.000633	4.50191	6.73e-06	-/+
FAM86DP	THAP9	-0.01161	0.795278	0.569403	3.09e-06	4.50001	6.8e-06	0/+
MTAP	THAP9	0.362676	0	0.776947	7.53e-13	4.49597	6.93e-06	#ERROR!
CDK7	THAP9	0.219301	6.98e-07	0.706595	5.73e-10	4.49441	6.98e-06	#ERROR!
DSP	THAP9	0.135866	0.002283	0.660514	1.69e-08	4.49158	7.07e-06	#ERROR!
SLC6A12	THAP9	-0.12252	0.005985	0.488287	0.000101	4.49111	7.09e-06	-/+
AGMAT	THAP9	0.416117	0	-0.21065	0.112458	-4.4904	7.11e-06	#ERROR!
MAP3K7	THAP9	0.498509	0	0.834841	4.44e-16	4.48861	7.17e-06	#ERROR!
GTF2H3	THAP9	0.518103	0	0.842606	0	4.48702	7.22e-06	#ERROR!
LSR	THAP9	-0.03255	0.466789	0.553611	6.56e-06	4.48557	7.27e-06	0/+
ARL13B	THAP9	0.256462	5.56e-09	0.724967	1.24e-10	4.48271	7.37e-06	#ERROR!
BAG3	THAP9	-0.14372	0.001242	0.470346	0.000195	4.47945	7.48e-06	-/+
LANCL2	THAP9	0.47503	0	0.824782	1.78e-15	4.47811	7.53e-06	#ERROR!
CTDSPL	THAP9	0.180202	4.89e-05	0.684273	3.18e-09	4.47722	7.56e-06	#ERROR!
LTBP3	THAP9	0.037297	0.404361	0.599176	6.72e-07	4.4747	7.65e-06	0/+
CLEC16A	THAP9	0.191675	1.53e-05	0.690328	2.03e-09	4.47444	7.66e-06	#ERROR!
CNIH3	THAP9	0.117876	0.008201	0.648146	3.79e-08	4.46871	7.87e-06	#ERROR!
RIOK3	THAP9	0.400776	0	0.791959	1.33e-13	4.45792	8.28e-06	#ERROR!
SLC2A13	THAP9	0.17548	7.73e-05	0.68006	4.33e-09	4.45667	8.32e-06	#ERROR!
GINM1	THAP9	0.610109	0	0.876523	0	4.45363	8.44e-06	#ERROR!
PRRG1	THAP9	0.21317	1.44e-06	0.700269	9.47e-10	4.45277	8.48e-06	#ERROR!
HMGXB4	THAP9	0.328312	4.44e-14	0.75769	5.78e-12	4.44249	8.89e-06	#ERROR!
JPH3	THAP9	-0.15198	0.000634	0.458997	0.00029	4.43819	9.07e-06	-/+
FGF13	THAP9	0.105896	0.017625	0.638243	7.06e-08	4.43616	9.16e-06	#ERROR!
IPO7	THAP9	0.38818	0	0.785068	3e-13	4.43536	9.19e-06	#ERROR!
RRAGD	THAP9	0.073073	0.10198	0.617848	2.38e-07	4.43209	9.33e-06	0/+
DDX52	THAP9	0.24057	4.84e-08	0.713005	3.4e-10	4.4292	9.46e-06	#ERROR!
PRSS22	THAP9	-0.189	2.02e-05	0.427231	0.000824	4.4286	9.48e-06	-/+
CD59	THAP9	0.043824	0.327124	0.598622	6.93e-07	4.4241	9.68e-06	0/+
CD47	THAP9	0.119261	0.007473	0.645072	4.61e-08	4.42298	9.73e-06	#ERROR!
MED4	THAP9	0.516374	0	0.838976	2.22e-16	4.41848	9.94e-06	#ERROR!
MOSPD1	THAP9	0.457115	0	0.814181	7.77e-15	4.41389	1.02e-05	#ERROR!
TEAD1	THAP9	0.240085	5.16e-08	0.711425	3.87e-10	4.4108	1.03e-05	#ERROR!
NUDT21	THAP9	0.495572	0	0.830116	8.88e-16	4.41006	1.03e-05	#ERROR!
LOC101927811	THAP9	0.016088	0.719168	0.57876	1.95e-06	4.40607	1.05e-05	0/+
CDC42BPG	THAP9	-0.00498	0.911435	0.564239	3.97e-06	4.40265	1.07e-05	0/+
ERLIN1	THAP9	0.385298	0	0.781838	4.35e-13	4.40135	1.08e-05	#ERROR!
SEMA3B	THAP9	-0.12153	0.006405	0.47872	0.000144	4.3989	1.09e-05	-/+
ENPP4	THAP9	0.557886	0	0.85462	0	4.39772	1.09e-05	#ERROR!
TMEM217	THAP9	-0.01942	0.664175	0.553448	6.61e-06	4.39416	1.11e-05	0/+
RAP1GAP2	THAP9	0.214773	1.19e-06	0.696352	1.28e-09	4.38902	1.14e-05	#ERROR!
EVPL	THAP9	0.042446	0.342588	0.594315	8.72e-07	4.38784	1.14e-05	0/+
IARS2	THAP9	0.338894	5.77e-15	0.759352	4.88e-12	4.38783	1.14e-05	#ERROR!
SELENOT	THAP9	0.496914	0	0.82958	8.88e-16	4.38612	1.15e-05	#ERROR!
PLXNB2	THAP9	0.143468	0.001268	0.656023	2.27e-08	4.38439	1.16e-05	#ERROR!
SLC43A3	THAP9	0.019504	0.662881	0.578627	1.96e-06	4.38134	1.18e-05	0/+
FUCA1	THAP9	0.179296	5.35e-05	0.676182	5.71e-09	4.38067	1.18e-05	#ERROR!
FMR1	THAP9	0.470917	0	0.818383	4.44e-15	4.37973	1.19e-05	#ERROR!
ISOC1	THAP9	0.313031	7.11e-13	0.746282	1.77e-11	4.37941	1.19e-05	#ERROR!
CCDC167	THAP9	0.190275	1.77e-05	-0.42021	0.001023	-4.37916	1.19e-05	#ERROR!
CREB5	THAP9	-0.18008	4.95e-05	0.428053	0.000803	4.37233	1.23e-05	-/+
ECE1	THAP9	-0.00418	0.925596	0.561739	4.48e-06	4.37217	1.23e-05	0/+
PON3	THAP9	0.139118	0.001782	0.65186	2.98e-08	4.365	1.27e-05	#ERROR!
SPRYD7	THAP9	0.38604	0	0.780078	5.31e-13	4.36454	1.27e-05	#ERROR!
PRNP	THAP9	0.215102	1.15e-06	0.694629	1.46e-09	4.36385	1.28e-05	#ERROR!
ANKRD13C	THAP9	0.632911	0	0.881906	0	4.36174	1.29e-05	#ERROR!
RPE	THAP9	0.530914	0	0.842316	0	4.35936	1.3e-05	#ERROR!
C5orf24	THAP9	0.584917	0	0.863387	0	4.352	1.35e-05	#ERROR!
SPAG16	THAP9	0.539183	0	0.845282	0	4.35057	1.36e-05	#ERROR!
GLRB	THAP9	0.056513	0.206216	0.599871	6.48e-07	4.35046	1.36e-05	0/+
ACO1	THAP9	0.245574	2.49e-08	0.709641	4.48e-10	4.34629	1.38e-05	#ERROR!
H2AC7	THAP9	0.374743	0	-0.23712	0.073101	-4.34552	1.39e-05	#ERROR!
KYAT3	THAP9	0.351426	4.44e-16	0.762655	3.48e-12	4.34422	1.4e-05	#ERROR!
GLT8D2	THAP9	0.330288	3.06e-14	0.752338	9.85e-12	4.34223	1.41e-05	#ERROR!
RAI2	THAP9	0.154838	0.000498	0.658976	1.87e-08	4.34045	1.42e-05	#ERROR!
DCUN1D3	THAP9	0.119222	0.007493	0.637815	7.25e-08	4.33896	1.43e-05	#ERROR!
NXPH4	THAP9	0.248769	1.61e-08	-0.36297	0.005105	-4.33701	1.44e-05	#ERROR!
LEMD1	THAP9	-0.23428	1.1e-07	0.37626	0.003604	4.337	1.44e-05	-/+
ERGIC1	THAP9	0.426503	0	0.796604	7.55e-14	4.33174	1.48e-05	#ERROR!
LAMC2	THAP9	-0.07226	0.105874	0.508829	4.53e-05	4.33103	1.48e-05	0/+
RAB11A	THAP9	0.457905	0	0.810354	1.29e-14	4.33016	1.49e-05	#ERROR!
NKIRAS1	THAP9	0.539261	0	0.844372	0	4.32809	1.5e-05	#ERROR!
NKX2-2	THAP9	0.192086	1.47e-05	-0.41234	0.001299	-4.32689	1.51e-05	#ERROR!
GOLPH3	THAP9	0.55834	0	0.851944	0	4.32592	1.52e-05	#ERROR!
SLC39A8	THAP9	0.291473	2.75e-11	0.731923	6.69e-11	4.32523	1.52e-05	#ERROR!
EI24	THAP9	0.347471	1.11e-15	0.759536	4.79e-12	4.32435	1.53e-05	#ERROR!
LCMT1	THAP9	0.042213	0.345245	0.588018	1.21e-06	4.32326	1.54e-05	0/+
C10orf105	THAP9	0.094534	0.034214	-0.49099	9.11e-05	-4.32185	1.55e-05	#ERROR!
CCNB3	THAP9	0.489303	0	0.823413	2.22e-15	4.32181	1.55e-05	#ERROR!
HSF2BP	THAP9	0.261195	2.83e-09	0.716001	2.65e-10	4.32056	1.56e-05	#ERROR!
KIFAP3	THAP9	0.34133	3.55e-15	0.756152	6.74e-12	4.31763	1.58e-05	#ERROR!
CDC5L	THAP9	0.542612	0	0.845115	0	4.31344	1.61e-05	#ERROR!
TENT5A	THAP9	0.0853	0.056148	0.614556	2.87e-07	4.3117	1.62e-05	0/+
AIG1	THAP9	0.570181	0	0.855972	0	4.30885	1.64e-05	#ERROR!
CGRRF1	THAP9	0.613562	0	0.872625	0	4.30257	1.69e-05	#ERROR!
MED13	THAP9	0.233834	1.16e-07	0.700074	9.61e-10	4.30145	1.7e-05	#ERROR!
LAMTOR3	THAP9	0.616912	0	0.873675	0	4.29593	1.74e-05	#ERROR!
GP1BA	THAP9	0.370568	0	-0.23445	0.076487	-4.29306	1.76e-05	#ERROR!
GNG12	THAP9	0.436033	0	0.798788	5.77e-14	4.29277	1.76e-05	#ERROR!
SH2D1B	THAP9	0.230465	1.78e-07	-0.37368	0.00386	-4.28896	1.8e-05	#ERROR!
BNIP3L	THAP9	0.494878	0	0.824179	1.78e-15	4.28782	1.8e-05	#ERROR!
MMUT	THAP9	0.596639	0	0.86551	0	4.2863	1.82e-05	#ERROR!
MCMBP	THAP9	0.398694	0	0.781377	4.58e-13	4.28503	1.83e-05	#ERROR!
LOC105369147	THAP9	0.331202	2.58e-14	0.749116	1.35e-11	4.28474	1.83e-05	#ERROR!
IRAG2	THAP9	0.38597	0	-0.21621	0.103076	-4.28457	1.83e-05	#ERROR!
LTF	THAP9	0.298626	8.46e-12	-0.30799	0.018674	-4.2818	1.85e-05	#ERROR!
PPP1R9A	THAP9	0.323523	1.07e-13	0.745028	2e-11	4.2803	1.87e-05	#ERROR!
ATP2A3	THAP9	0.181076	4.49e-05	-0.41599	0.001164	-4.27906	1.88e-05	#ERROR!
FBXO21	THAP9	0.52548	0	0.836594	4.44e-16	4.27842	1.88e-05	#ERROR!
CDK4	THAP9	0.267449	1.14e-09	0.716254	2.6e-10	4.27816	1.88e-05	#ERROR!
C11orf58	THAP9	0.5715	0	0.855236	0	4.27669	1.9e-05	#ERROR!
FBXO4	THAP9	0.570062	0	0.854647	0	4.27631	1.9e-05	#ERROR!
PRKRA	THAP9	0.391186	0	0.777316	7.23e-13	4.27514	1.91e-05	#ERROR!
GTPBP8	THAP9	0.441244	0	0.800086	4.91e-14	4.27324	1.93e-05	#ERROR!
MIPEP	THAP9	0.387558	0	0.775495	8.85e-13	4.27302	1.93e-05	#ERROR!
PAPSS1	THAP9	0.154838	0.000498	0.653234	2.73e-08	4.27152	1.94e-05	#ERROR!
RAMP3	THAP9	0.343346	2.44e-15	-0.26018	0.048556	-4.26714	1.98e-05	#ERROR!
MTHFD2L	THAP9	0.388327	0	0.775471	8.87e-13	4.26642	1.99e-05	#ERROR!
CCNDBP1	THAP9	0.354131	4.44e-16	0.759086	5.02e-12	4.26517	2e-05	#ERROR!
GALNT5	THAP9	-0.1991	6.96e-06	0.398612	0.00194	4.26447	2e-05	-/+
ABCA12	THAP9	-0.00513	0.908637	0.549945	7.76e-06	4.26203	2.03e-05	0/+
TMEM192	THAP9	0.578726	0	0.857494	0	4.26079	2.04e-05	#ERROR!
SLC7A8	THAP9	0.25754	4.77e-09	0.709671	4.47e-10	4.25938	2.05e-05	#ERROR!
BPGM	THAP9	0.075656	0.090396	0.602803	5.52e-07	4.2504	2.13e-05	0/+
SCOC	THAP9	0.510862	0	0.829211	8.88e-16	4.25023	2.14e-05	#ERROR!
PCNP	THAP9	0.563445	0	0.850929	0	4.24977	2.14e-05	#ERROR!
CAST	THAP9	0.07145	0.109838	0.599883	6.47e-07	4.24805	2.16e-05	0/+
PICART1	THAP9	0.046773	0.295594	0.583558	1.53e-06	4.2456	2.18e-05	0/+
CHCHD3	THAP9	0.294229	1.75e-11	0.727586	9.82e-11	4.24119	2.22e-05	#ERROR!
SELENOF	THAP9	0.543929	0	0.842531	0	4.23932	2.24e-05	#ERROR!
MAP3K5	THAP9	0.00668	0.881319	0.555679	5.96e-06	4.23771	2.26e-05	0/+
SLC25A16	THAP9	0.447066	0	0.8008	4.49e-14	4.23723	2.26e-05	#ERROR!
ELOVL7	THAP9	0.016539	0.711636	0.562033	4.41e-06	4.23347	2.3e-05	0/+
ABHD12	THAP9	0.080981	0.069854	0.604528	5.03e-07	4.23234	2.31e-05	0/+
GBA	THAP9	0.33101	2.66e-14	0.745386	1.93e-11	4.22847	2.35e-05	#ERROR!
BDNF	THAP9	0.143946	0.001221	0.643056	5.23e-08	4.22769	2.36e-05	#ERROR!
PPP4R4	THAP9	0.207321	2.81e-06	0.679471	4.51e-09	4.22322	2.41e-05	#ERROR!
SLC26A2	THAP9	0.174154	8.77e-05	0.660484	1.69e-08	4.22297	2.41e-05	#ERROR!
CLTRN	THAP9	0.42031	0	0.787868	2.16e-13	4.22292	2.41e-05	#ERROR!
SNX12	THAP9	0.461622	0	0.806478	2.18e-14	4.22146	2.43e-05	#ERROR!
SMNDC1	THAP9	0.557109	0	0.847171	0	4.22086	2.43e-05	#ERROR!
RAB34	THAP9	-0.0313	0.48407	0.527039	2.13e-05	4.22042	2.44e-05	0/+
ST14	THAP9	-0.15126	0.000673	0.433955	0.000666	4.21934	2.45e-05	-/+
AASDHPPT	THAP9	0.668366	0	0.890519	0	4.2156	2.49e-05	#ERROR!
NPEPPS	THAP9	0.284637	8.23e-11	0.720522	1.81e-10	4.21125	2.54e-05	#ERROR!
FAM3D	THAP9	0.268509	9.74e-10	-0.32796	0.011964	-4.20977	2.56e-05	#ERROR!
SLC30A7	THAP9	0.38697	0	0.771391	1.38e-12	4.20792	2.58e-05	#ERROR!
CRTAP	THAP9	0.259172	3.78e-09	0.706657	5.7e-10	4.20609	2.6e-05	#ERROR!
PLIN3	THAP9	0.189193	1.98e-05	0.66759	1.04e-08	4.20354	2.63e-05	#ERROR!
GNPDA1	THAP9	0.210594	1.93e-06	0.679689	4.44e-09	4.2026	2.64e-05	#ERROR!
GPR27	THAP9	0.298135	9.18e-12	0.726767	1.06e-10	4.20003	2.67e-05	#ERROR!
PELI3	THAP9	0.058503	0.190662	0.586646	1.3e-06	4.19728	2.7e-05	0/+
LTBP2	THAP9	0.050128	0.262271	0.580995	1.74e-06	4.19611	2.72e-05	0/+
PMPCB	THAP9	0.562044	0	0.848099	0	4.19428	2.74e-05	#ERROR!
ARHGAP32	THAP9	0.257444	4.84e-09	0.704822	6.61e-10	4.19375	2.74e-05	#ERROR!
B4GALT5	THAP9	-0.02879	0.51989	0.525902	2.24e-05	4.19245	2.76e-05	0/+
SPTSSA	THAP9	0.191023	1.64e-05	0.667559	1.04e-08	4.19019	2.79e-05	#ERROR!
BORCS8-MEF2B	THAP9	0.214089	1.29e-06	-0.376	0.003629	-4.1896	2.79e-05	#ERROR!
DOCK10	THAP9	0.317039	3.49e-13	-0.27652	0.035623	-4.18561	2.84e-05	#ERROR!
PLPP4	THAP9	-0.25199	1.04e-08	0.340491	0.008915	4.18509	2.85e-05	-/+
PPA1	THAP9	0.070079	0.116842	0.592962	9.37e-07	4.18403	2.86e-05	0/+
SERINC5	THAP9	0.099647	0.025575	0.611511	3.41e-07	4.17942	2.92e-05	#ERROR!
SLC35D3	THAP9	-0.16734	0.000165	0.415607	0.001177	4.17906	2.93e-05	-/+
DOK5	THAP9	0.058077	0.193915	0.584502	1.45e-06	4.17791	2.94e-05	0/+
MCOLN3	THAP9	0.055771	0.212239	0.582939	1.58e-06	4.17751	2.95e-05	0/+
PLA2G4A	THAP9	-0.08155	0.067891	0.484825	0.000115	4.17706	2.95e-05	0/+
COX7A2L	THAP9	0.339169	5.55e-15	0.746116	1.8e-11	4.17689	2.96e-05	#ERROR!
PLEKHA5	THAP9	0.258906	3.93e-09	0.70435	6.86e-10	4.17664	2.96e-05	#ERROR!
KLHL2	THAP9	0.176254	7.18e-05	0.657704	2.03e-08	4.17457	2.99e-05	#ERROR!
PLCD1	THAP9	-0.11624	0.009142	0.456903	0.000312	4.17124	3.03e-05	-/+
TMEM25	THAP9	0.342851	2.66e-15	0.747385	1.59e-11	4.16802	3.07e-05	#ERROR!
S100A5	THAP9	-0.20189	5.13e-06	0.38416	0.00291	4.16768	3.08e-05	-/+
LAPTM4B	THAP9	0.352854	4.44e-16	0.752215	9.97e-12	4.16563	3.1e-05	#ERROR!
DOCK9	THAP9	0.179253	5.37e-05	0.658576	1.92e-08	4.16391	3.13e-05	#ERROR!
PITX3	THAP9	-0.35983	0	0.228248	0.08484	4.16352	3.13e-05	-/0
B4GALNT3	THAP9	-0.0625	0.162052	0.497454	7.1e-05	4.15991	3.18e-05	0/+
INSIG2	THAP9	0.439892	0	0.793343	1.13e-13	4.15849	3.2e-05	#ERROR!
SEH1L	THAP9	0.370299	0	0.760225	4.47e-12	4.15634	3.23e-05	#ERROR!
PPP2R3A	THAP9	0.188434	2.14e-05	0.663247	1.4e-08	4.15564	3.24e-05	#ERROR!
SYT1	THAP9	-0.35257	4.44e-16	0.234547	0.076363	4.15217	3.29e-05	-/0
SUPT3H	THAP9	0.400477	0	0.774479	9.89e-13	4.15109	3.31e-05	#ERROR!
S1PR5	THAP9	0.159728	0.000327	-0.41866	0.001073	-4.15082	3.31e-05	#ERROR!
SH3TC1	THAP9	0.435198	0	-0.13993	0.294787	-4.15069	3.31e-05	#ERROR!
SNX9	THAP9	0.305571	2.61e-12	0.72699	1.04e-10	4.14734	3.36e-05	#ERROR!
DYNC1I2	THAP9	0.321677	1.51e-13	0.735123	5.01e-11	4.14465	3.4e-05	#ERROR!
AP2M1	THAP9	0.206898	2.94e-06	0.672973	7.17e-09	4.14439	3.41e-05	#ERROR!
KRT19	THAP9	-0.38823	0	0.194014	0.144481	4.14434	3.41e-05	-/0
TBC1D25	THAP9	0.357366	0	0.75308	9.15e-12	4.14399	3.41e-05	#ERROR!
PROS1	THAP9	-0.18727	2.41e-05	0.394057	0.002209	4.14349	3.42e-05	-/+
RETREG2	THAP9	0.355703	2.22e-16	0.751753	1.04e-11	4.1361	3.53e-05	#ERROR!
DDX50	THAP9	0.577892	0	0.852142	0	4.13346	3.57e-05	#ERROR!
BNIPL	THAP9	-0.0527	0.238539	0.501654	6.03e-05	4.13095	3.61e-05	0/+
SEC14L2	THAP9	-0.00748	0.867225	0.534669	1.54e-05	4.13012	3.63e-05	0/+
MMP14	THAP9	-0.08338	0.061935	0.478028	0.000148	4.12915	3.64e-05	0/+
MRAS	THAP9	0.119365	0.007421	0.619242	2.2e-07	4.12804	3.66e-05	#ERROR!
STAU2	THAP9	0.511445	0	0.823766	2e-15	4.12737	3.67e-05	#ERROR!
TLCD5	THAP9	0.32723	5.42e-14	0.736734	4.33e-11	4.12625	3.69e-05	#ERROR!
INPP5F	THAP9	0.263827	1.94e-09	0.703141	7.55e-10	4.12415	3.72e-05	#ERROR!
RRP15	THAP9	0.454421	0	0.798105	6.28e-14	4.12309	3.74e-05	#ERROR!
KCTD3	THAP9	0.679674	0	0.891962	0	4.12186	3.76e-05	#ERROR!
CTNNAL1	THAP9	0.229806	1.93e-07	0.684109	3.22e-09	4.12103	3.77e-05	#ERROR!
MFN1	THAP9	0.386927	0	0.766119	2.43e-12	4.12015	3.79e-05	#ERROR!
CYB5R2	THAP9	0.109046	0.014508	0.61189	3.34e-07	4.1186	3.81e-05	#ERROR!
ANKS6	THAP9	0.33998	4.88e-15	0.74269	2.49e-11	4.11809	3.82e-05	#ERROR!
PIP5KL1	THAP9	-0.05898	0.187078	0.495131	7.77e-05	4.11467	3.88e-05	0/+
NT5DC3	THAP9	-0.0231	0.605665	0.521757	2.67e-05	4.11447	3.88e-05	0/+
ATP6V0A1	THAP9	0.373176	0	0.758779	5.18e-12	4.11017	3.95e-05	#ERROR!
IFT57	THAP9	0.475197	0	0.806706	2.09e-14	4.10702	4.01e-05	#ERROR!
SLAIN2	THAP9	0.435769	0	0.788606	1.99e-13	4.10685	4.01e-05	#ERROR!
FKBP11	THAP9	0.196537	9.17e-06	-0.38077	0.003191	-4.10244	4.09e-05	#ERROR!
ABI3	THAP9	0.160381	0.000309	-0.41221	0.001303	-4.10216	4.09e-05	#ERROR!
SMYD2	THAP9	0.341805	3.33e-15	0.742536	2.53e-11	4.10163	4.1e-05	#ERROR!
DARS1	THAP9	0.701079	0	0.899409	0	4.09976	4.14e-05	#ERROR!
IFT52	THAP9	0.57865	0	0.85103	0	4.09801	4.17e-05	#ERROR!
RTCB	THAP9	0.248283	1.73e-08	0.692537	1.72e-09	4.09656	4.19e-05	#ERROR!
SFTA3	THAP9	0.505786	0	0.819798	3.55e-15	4.096	4.2e-05	#ERROR!
SNX24	THAP9	0.363582	0	0.75313	9.11e-12	4.09593	4.2e-05	#ERROR!
CDCP1	THAP9	-0.02368	0.596632	0.519103	2.98e-05	4.09355	4.25e-05	0/+
CDS1	THAP9	0.509065	0	0.821103	3.11e-15	4.0931	4.26e-05	#ERROR!
SUMO3	THAP9	0.394304	0	0.768019	1.99e-12	4.0922	4.27e-05	#ERROR!
CLINT1	THAP9	0.530602	0	0.830196	8.88e-16	4.08665	4.38e-05	#ERROR!
PXN	THAP9	0.290599	3.17e-11	0.714686	2.96e-10	4.08455	4.42e-05	#ERROR!
CETP	THAP9	0.44428	0	-0.11921	0.37279	-4.08352	4.44e-05	#ERROR!
MAP2K4	THAP9	0.610085	0	0.863357	0	4.08351	4.44e-05	#ERROR!
CXorf56	THAP9	0.476073	0	0.805894	2.33e-14	4.08341	4.44e-05	#ERROR!
NHLRC3	THAP9	0.52684	0	0.828411	8.88e-16	4.08328	4.44e-05	#ERROR!
AVPI1	THAP9	-0.07468	0.094634	0.479374	0.000141	4.08124	4.48e-05	0/+
BTBD10	THAP9	0.253397	8.54e-09	0.693903	1.55e-09	4.07722	4.56e-05	#ERROR!
CDKN2C	THAP9	0.396475	0	-0.17493	0.189044	-4.07591	4.58e-05	#ERROR!
OTUD7B	THAP9	0.400019	0	0.769657	1.67e-12	4.07318	4.64e-05	#ERROR!
FIGNL1	THAP9	0.139919	0.001675	0.627025	1.39e-07	4.0721	4.66e-05	#ERROR!
CAV2	THAP9	0.076071	0.088639	0.585487	1.38e-06	4.06456	4.81e-05	0/+
MAPKAPK3	THAP9	-0.03107	0.487261	0.510244	4.28e-05	4.06177	4.87e-05	0/+
PPP2CB	THAP9	0.445407	0	0.790575	1.57e-13	4.06083	4.89e-05	#ERROR!
ERGIC2	THAP9	0.391375	0	0.764673	2.82e-12	4.06045	4.9e-05	#ERROR!
ORC3	THAP9	0.540811	0	0.833364	4.44e-16	4.05906	4.93e-05	#ERROR!
SNW1	THAP9	0.439005	0	0.787314	2.31e-13	4.0562	4.99e-05	#ERROR!
SGCB	THAP9	0.407133	0	0.771945	1.3e-12	4.05363	5.04e-05	#ERROR!
NIFK	THAP9	0.358811	0	0.74797	1.51e-11	4.05265	5.06e-05	#ERROR!
ATG9A	THAP9	0.311124	9.95e-13	0.72331	1.43e-10	4.05233	5.07e-05	#ERROR!
PYGB	THAP9	0.152253	0.00062	0.63286	9.81e-08	4.05208	5.08e-05	#ERROR!
CGN	THAP9	0.084749	0.057762	0.589732	1.11e-06	4.04918	5.14e-05	0/+
CLSTN1	THAP9	0.330572	2.89e-14	0.733143	5.99e-11	4.04724	5.18e-05	#ERROR!
LRRC41	THAP9	0.462643	0	0.797773	6.55e-14	4.04566	5.22e-05	#ERROR!
NOVA1	THAP9	0.215298	1.12e-06	0.669712	9e-09	4.0437	5.26e-05	#ERROR!
IL1RAP	THAP9	-0.02149	0.630917	0.515182	3.5e-05	4.04203	5.3e-05	0/+
TMEM17	THAP9	0.306172	2.35e-12	0.71992	1.91e-10	4.04139	5.31e-05	#ERROR!
P3H3	THAP9	-0.09412	0.035019	0.459548	0.000285	4.0412	5.32e-05	-/+
HBS1L	THAP9	0.515535	0	0.821441	2.66e-15	4.04023	5.34e-05	#ERROR!
LRP10	THAP9	0.16468	0.000211	0.639289	6.62e-08	4.03875	5.37e-05	#ERROR!
RUFY1	THAP9	0.254186	7.65e-09	0.691225	1.9e-09	4.03628	5.43e-05	#ERROR!
SETD9	THAP9	0.249829	1.4e-08	0.688744	2.29e-09	4.03571	5.44e-05	#ERROR!
CMAS	THAP9	0.550084	0	0.836225	4.44e-16	4.03334	5.5e-05	#ERROR!
SYTL5	THAP9	-0.10478	0.018866	0.449959	0.000394	4.03215	5.53e-05	-/+
TM4SF1-AS1	THAP9	-0.28216	1.22e-10	0.291024	0.026668	4.03148	5.54e-05	-/+
HOPX	THAP9	0.090329	0.043079	0.591608	1.01e-06	4.03044	5.57e-05	#ERROR!
SLU7	THAP9	0.57888	0	0.848314	0	4.02888	5.6e-05	#ERROR!
KIFBP	THAP9	0.475278	0	0.802633	3.55e-14	4.02731	5.64e-05	#ERROR!
RFC5	THAP9	0.372224	0	0.752946	9.27e-12	4.02469	5.71e-05	#ERROR!
SPTLC1	THAP9	0.558702	0	0.839547	2.22e-16	4.02451	5.71e-05	#ERROR!
ECT2L	THAP9	0.168783	0.000145	0.640471	6.15e-08	4.02359	5.73e-05	#ERROR!
PWP1	THAP9	0.559265	0	0.839745	2.22e-16	4.02349	5.73e-05	#ERROR!
MYO6	THAP9	0.092544	0.038194	0.592316	9.69e-07	4.02261	5.76e-05	#ERROR!
DDX4	THAP9	0.121395	0.006465	-0.43524	0.000639	-4.02212	5.77e-05	#ERROR!
NGEF	THAP9	-0.2587	4.04e-09	0.312776	0.016826	4.02209	5.77e-05	-/+
NOTCH2	THAP9	0.143764	0.001239	0.624954	1.57e-07	4.022	5.77e-05	#ERROR!
ABCA4	THAP9	0.007454	0.86769	0.533807	1.6e-05	4.01977	5.83e-05	0/+
AEBP2	THAP9	0.560398	0	0.839991	2.22e-16	4.01792	5.87e-05	#ERROR!
FIBIN	THAP9	0.080643	0.071032	0.583887	1.5e-06	4.0165	5.91e-05	0/+
CTSF	THAP9	0.135419	0.002361	0.619232	2.2e-07	4.01637	5.91e-05	#ERROR!
F11R	THAP9	0.287404	5.3e-11	0.70801	5.11e-10	4.016	5.92e-05	#ERROR!
OXR1	THAP9	0.385995	0	0.759271	4.92e-12	4.01571	5.93e-05	#ERROR!
TMBIM1	THAP9	0.336978	8.44e-15	0.734189	5.45e-11	4.01344	5.98e-05	#ERROR!
RPS6KA2	THAP9	0.319192	2.37e-13	0.724837	1.25e-10	4.01303	5.99e-05	#ERROR!
SGCE	THAP9	0.241688	4.18e-08	0.682386	3.65e-09	4.01293	6e-05	#ERROR!
KLK5	THAP9	-0.10908	0.014481	0.44411	0.000479	4.01191	6.02e-05	-/+
FGF13-AS1	THAP9	0.108865	0.014674	0.601788	5.84e-07	4.01052	6.06e-05	#ERROR!
KDM5B	THAP9	0.305116	2.82e-12	0.716931	2.45e-10	4.00713	6.15e-05	#ERROR!
SERINC1	THAP9	0.605349	0	0.85825	0	4.00006	6.33e-05	#ERROR!
AGFG1	THAP9	0.269204	8.78e-10	0.696711	1.25e-09	3.99841	6.38e-05	#ERROR!
CUL7	THAP9	0.312775	7.44e-13	0.720407	1.83e-10	3.99839	6.38e-05	#ERROR!
IPO5	THAP9	0.42877	0	0.779113	5.92e-13	3.99734	6.41e-05	#ERROR!
ACBD7	THAP9	-0.03363	0.452205	0.501246	6.13e-05	3.99658	6.43e-05	0/+
PEX10	THAP9	0.437172	0	0.7831	3.77e-13	3.99656	6.43e-05	#ERROR!
NCAM2	THAP9	-0.09839	0.027506	0.450538	0.000387	3.99299	6.52e-05	-/+
DNASE1L3	THAP9	0.373595	0	-0.18888	0.155617	-3.99085	6.58e-05	#ERROR!
ARHGEF39	THAP9	0.232079	1.45e-07	-0.3337	0.010471	-3.98811	6.66e-05	#ERROR!
H2BC9	THAP9	0.378186	0	-0.183	0.169126	-3.98579	6.73e-05	#ERROR!
TGFBR1	THAP9	-0.05198	0.244987	0.485911	0.00011	3.98371	6.78e-05	0/+
MAT2B	THAP9	0.443369	0	0.785314	2.92e-13	3.98334	6.8e-05	#ERROR!
MYO1C	THAP9	0.137922	0.001953	0.617817	2.38e-07	3.98326	6.8e-05	#ERROR!
SMS	THAP9	0.284909	7.88e-11	0.704176	6.95e-10	3.9823	6.83e-05	#ERROR!
BRMS1L	THAP9	0.606448	0	0.857956	0	3.98055	6.88e-05	#ERROR!
GRAP	THAP9	0.364419	0	-0.19732	0.137638	-3.97814	6.95e-05	#ERROR!
PACERR	THAP9	-0.01765	0.693254	0.511122	4.13e-05	3.97805	6.95e-05	0/+
RPL21P40	THAP9	0.039901	0.372326	-0.49443	7.98e-05	-3.97762	6.96e-05	0/-
LRPPRC	THAP9	0.385097	0	0.756398	6.58e-12	3.97679	6.99e-05	#ERROR!
MAPK1	THAP9	0.349679	6.66e-16	0.738064	3.83e-11	3.97285	7.1e-05	#ERROR!
FCHO2	THAP9	0.349718	6.66e-16	0.738064	3.83e-11	3.97254	7.11e-05	#ERROR!
BICC1	THAP9	-0.03379	0.449954	0.498439	6.84e-05	3.97214	7.12e-05	0/+
TMA16	THAP9	0.370785	0	0.748762	1.4e-11	3.97054	7.17e-05	#ERROR!
IGF1R	THAP9	0.377324	0	0.75203	1.01e-11	3.9697	7.2e-05	#ERROR!
MRC1	THAP9	-0.24136	4.37e-08	0.322505	0.013548	3.96957	7.2e-05	-/+
TMEM106B	THAP9	0.451474	0	0.78836	2.04e-13	3.96873	7.23e-05	#ERROR!
APEX1	THAP9	0.325353	7.68e-14	0.724929	1.24e-10	3.96736	7.27e-05	#ERROR!
CHSY3	THAP9	0.222694	4.64e-07	0.66778	1.03e-08	3.96669	7.29e-05	#ERROR!
ASNSD1	THAP9	0.498843	0	0.810244	1.33e-14	3.9649	7.34e-05	#ERROR!
BRIX1	THAP9	0.294886	1.57e-11	0.708195	5.04e-10	3.96265	7.41e-05	#ERROR!
GMFB	THAP9	0.391099	0	0.758521	5.31e-12	3.96252	7.42e-05	#ERROR!
NUFIP1	THAP9	0.629318	0	0.86674	0	3.96193	7.43e-05	#ERROR!
POPDC2	THAP9	0.446857	0	-0.0984	0.462428	-3.96155	7.45e-05	#ERROR!
AP1AR	THAP9	0.511535	0	0.81584	6.22e-15	3.96126	7.46e-05	#ERROR!
H2BC3	THAP9	0.167238	0.000167	-0.38897	0.002547	-3.96107	7.46e-05	#ERROR!
MFSD11	THAP9	0.472066	0	0.797588	6.71e-14	3.95977	7.5e-05	#ERROR!
FBXL4	THAP9	0.537225	0	0.827206	1.33e-15	3.95808	7.56e-05	#ERROR!
LMO3	THAP9	0.284594	8.29e-11	0.702166	8.15e-10	3.95746	7.58e-05	#ERROR!
SSH3	THAP9	0.276467	2.94e-10	0.697562	1.17e-09	3.95608	7.62e-05	#ERROR!
PKP4	THAP9	0.354847	2.22e-16	0.739572	3.33e-11	3.9552	7.65e-05	#ERROR!
C5orf15	THAP9	0.404769	0	0.764704	2.81e-12	3.95214	7.75e-05	#ERROR!
SLC7A9	THAP9	0.331402	2.49e-14	-0.22917	0.083551	-3.94948	7.83e-05	#ERROR!
SLC38A11	THAP9	0.342631	2.89e-15	-0.21626	0.102997	-3.9432	8.04e-05	#ERROR!
MAK16	THAP9	0.530101	0	0.823328	2.22e-15	3.94303	8.05e-05	#ERROR!
REXO2	THAP9	0.030059	0.501607	0.541721	1.13e-05	3.94129	8.1e-05	0/+
RNF183	THAP9	-0.1825	3.9e-05	0.37303	0.003927	3.94116	8.11e-05	-/+
ABALON	THAP9	-0.05402	0.226958	0.479064	0.000142	3.93666	8.26e-05	0/+
DIS3	THAP9	0.582694	0	0.846069	0	3.93515	8.31e-05	#ERROR!
DMAC2L	THAP9	0.733328	0	0.907192	0	3.93457	8.33e-05	#ERROR!
EPHA4	THAP9	-0.00125	0.977754	0.518426	3.06e-05	3.93386	8.36e-05	0/+
RASAL1	THAP9	0.127057	0.004355	0.606352	4.55e-07	3.93353	8.37e-05	#ERROR!
CSDE1	THAP9	0.496812	0	0.807709	1.84e-14	3.9332	8.38e-05	#ERROR!
SPART	THAP9	0.535845	0	0.82541	1.55e-15	3.9326	8.4e-05	#ERROR!
LOC100129917	THAP9	0.739604	0	0.357971	0.005799	-3.93122	8.45e-05	#ERROR!
KCNJ10	THAP9	0.347179	1.11e-15	-0.2095	0.114488	-3.93008	8.49e-05	#ERROR!
RFK	THAP9	0.3454	1.78e-15	0.732904	6.12e-11	3.92926	8.52e-05	#ERROR!
ATG2A	THAP9	0.252539	9.62e-09	0.681955	3.77e-09	3.92842	8.55e-05	#ERROR!
TATDN1	THAP9	0.302118	4.7e-12	0.709513	4.53e-10	3.92648	8.62e-05	#ERROR!
FAM133A	THAP9	0.232798	1.32e-07	0.670375	8.59e-09	3.92596	8.64e-05	#ERROR!
MIEF2	THAP9	0.142766	0.00134	0.615664	2.7e-07	3.92573	8.65e-05	#ERROR!
LYL1	THAP9	0.058408	0.191383	-0.47443	0.000168	-3.92573	8.65e-05	0/-
PI4K2B	THAP9	0.456879	0	0.788519	2.01e-13	3.92505	8.67e-05	#ERROR!
SGPL1	THAP9	0.265062	1.62e-09	0.68861	2.31e-09	3.92244	8.77e-05	#ERROR!
ERO1A	THAP9	0.16811	0.000154	0.63086	1.11e-07	3.91806	8.93e-05	#ERROR!
ACBD3-AS1	THAP9	0.025427	0.569778	0.5355	1.48e-05	3.91307	9.11e-05	0/+
LOC100506098	THAP9	0.02327	0.602966	0.533902	1.59e-05	3.91253	9.13e-05	0/+
PDGFC	THAP9	0.322241	1.36e-13	0.719423	1.99e-10	3.91245	9.14e-05	#ERROR!
SLC36A4	THAP9	0.512056	0	0.813677	8.44e-15	3.91245	9.14e-05	#ERROR!
PDCD6IP	THAP9	0.52455	0	0.819257	4e-15	3.9101	9.23e-05	#ERROR!
MYH7	THAP9	0.135518	0.002344	-0.40961	0.001408	-3.90693	9.35e-05	#ERROR!
DCHS2	THAP9	-0.07729	0.083619	0.457394	0.000307	3.90669	9.36e-05	0/+
GPALPP1	THAP9	0.653342	0	0.874614	0	3.9054	9.41e-05	#ERROR!
FEZ2	THAP9	0.288594	4.38e-11	0.700485	9.31e-10	3.90505	9.42e-05	#ERROR!
ERBB2	THAP9	0.246015	2.35e-08	0.676336	5.65e-09	3.90467	9.44e-05	#ERROR!
ROR2	THAP9	0.235318	9.59e-08	0.670102	8.76e-09	3.90434	9.45e-05	#ERROR!
ASH2L	THAP9	0.429589	0	0.77411	1.03e-12	3.90431	9.45e-05	#ERROR!
TASP1	THAP9	0.619403	0	0.860417	0	3.90295	9.5e-05	#ERROR!
C3orf14	THAP9	0.235984	8.8e-08	0.670102	8.76e-09	3.89953	9.64e-05	#ERROR!
ARHGEF26	THAP9	0.278897	2.02e-10	0.694547	1.47e-09	3.8981	9.7e-05	#ERROR!
KIR2DL4	THAP9	0.143317	0.001283	-0.40174	0.001773	-3.89697	9.74e-05	#ERROR!
IMMP2L	THAP9	0.466183	0	0.791399	1.42e-13	3.89658	9.76e-05	#ERROR!
ABLIM1	THAP9	0.293255	2.06e-11	0.70235	8.04e-10	3.89535	9.81e-05	#ERROR!
EFL1	THAP9	0.290195	3.38e-11	0.700649	9.19e-10	3.89531	9.81e-05	#ERROR!
ARMC1	THAP9	0.540247	0	0.825643	1.55e-15	3.89526	9.81e-05	#ERROR!
ESF1	THAP9	0.440625	0	0.778916	6.05e-13	3.89399	9.86e-05	#ERROR!
CPD	THAP9	0.299785	6.96e-12	0.705857	6.08e-10	3.89395	9.86e-05	#ERROR!
ARMC10	THAP9	0.448739	0	0.782761	3.91e-13	3.89221	9.93e-05	#ERROR!
GLOD4	THAP9	0.447484	0	0.782115	4.21e-13	3.89155	9.96e-05	#ERROR!
KANK2	THAP9	0.10557	0.017979	0.588194	1.2e-06	3.88943	0.0001	#ERROR!
MSMO1	THAP9	0.109596	0.014017	0.590685	1.06e-06	3.88769	0.000101	#ERROR!
PDLIM1	THAP9	-0.04948	0.268525	0.477052	0.000153	3.88768	0.000101	0/+
SERBP1	THAP9	0.54837	0	0.828916	8.88e-16	3.88725	0.000101	#ERROR!
COBLL1	THAP9	0.254777	7.04e-09	0.679863	4.39e-09	3.8854	0.000102	#ERROR!
CAMK2N1	THAP9	-0.15163	0.000653	0.393079	0.002271	3.88474	0.000102	-/+
TAX1BP1	THAP9	0.519837	0	0.815861	6.22e-15	3.88437	0.000103	#ERROR!
ATP6V1B2	THAP9	0.102806	0.021235	0.585794	1.36e-06	3.88351	0.000103	#ERROR!
ABHD13	THAP9	0.524036	0	0.817639	4.88e-15	3.88144	0.000104	#ERROR!
CD2AP	THAP9	0.442875	0	0.779162	5.88e-13	3.87917	0.000105	#ERROR!
TEAD3	THAP9	0.169626	0.000134	0.628338	1.29e-07	3.87882	0.000105	#ERROR!
GABBR2	THAP9	-0.0382	0.393012	0.484496	0.000116	3.87666	0.000106	0/+
PRKAA2	THAP9	0.572204	0	0.838963	2.22e-16	3.87529	0.000106	#ERROR!
HMGXB3	THAP9	0.203949	4.09e-06	0.648917	3.61e-08	3.87331	0.000107	#ERROR!
EIF3H	THAP9	0.246982	2.06e-08	0.674244	6.55e-09	3.87134	0.000108	#ERROR!
COG6	THAP9	0.59615	0	0.849206	0	3.87037	0.000109	#ERROR!
AFDN	THAP9	0.335875	1.07e-14	0.723699	1.38e-10	3.86891	0.000109	#ERROR!
SHISA9	THAP9	-0.04228	0.34445	0.480469	0.000135	3.86869	0.000109	0/+
ITGA9	THAP9	0.231233	1.61e-07	0.66479	1.26e-08	3.8684	0.00011	#ERROR!
LYRM1	THAP9	0.406514	0	0.760213	4.47e-12	3.86453	0.000111	#ERROR!
FGF10	THAP9	-0.12634	0.004583	0.412165	0.001305	3.86413	0.000111	-/+
NXN	THAP9	-0.17643	7.05e-05	0.368678	0.004403	3.86385	0.000112	-/+
CYB5R1	THAP9	0.417839	0	0.765762	2.52e-12	3.86204	0.000112	#ERROR!
LOC728877	THAP9	0.060714	0.174404	0.554997	6.15e-06	3.86106	0.000113	0/+
SLC39A1	THAP9	0.386939	0	0.749969	1.24e-11	3.86041	0.000113	#ERROR!
FBXO22	THAP9	0.482035	0	0.796955	7.24e-14	3.85965	0.000114	#ERROR!
PARP4	THAP9	0.113604	0.010858	0.590532	1.06e-06	3.85833	0.000114	#ERROR!
MED21	THAP9	0.547879	0	0.827363	1.33e-15	3.85825	0.000114	#ERROR!
IRS2	THAP9	0.121046	0.006621	0.595309	8.27e-07	3.85711	0.000115	#ERROR!
NRK	THAP9	0.02191	0.624319	0.527058	2.13e-05	3.85672	0.000115	0/+
ASB4	THAP9	0.150192	0.000736	0.613751	3.01e-07	3.85283	0.000117	#ERROR!
RSPRY1	THAP9	0.553166	0	0.829396	8.88e-16	3.85068	0.000118	#ERROR!
TMEM30B	THAP9	0.62788	0	0.862003	0	3.8501	0.000118	#ERROR!
ATP6V1A	THAP9	0.365402	0	0.738095	3.82e-11	3.85006	0.000118	#ERROR!
GTF2IRD1	THAP9	0.142517	0.001367	0.608558	4.02e-07	3.84978	0.000118	#ERROR!
IFNGR2	THAP9	0.228579	2.25e-07	0.661693	1.56e-08	3.84975	0.000118	#ERROR!
SCRN1	THAP9	0.198593	7.35e-06	0.643636	5.04e-08	3.84948	0.000118	#ERROR!
GDAP1	THAP9	0.650262	0	0.871337	0	3.84786	0.000119	#ERROR!
BLZF1	THAP9	0.59923	0	0.849575	0	3.84667	0.00012	#ERROR!
SCCPDH	THAP9	0.300468	6.21e-12	0.702627	7.86e-10	3.84501	0.000121	#ERROR!
TMEM41A	THAP9	0.113497	0.010933	0.589178	1.14e-06	3.84488	0.000121	#ERROR!
ELFN1	THAP9	0.297924	9.51e-12	-0.24942	0.059008	-3.84225	0.000122	#ERROR!
PLBD1-AS1	THAP9	0.236384	8.36e-08	0.665682	1.19e-08	3.84208	0.000122	#ERROR!
DCTN4	THAP9	0.628511	0	0.861942	0	3.84133	0.000122	#ERROR!
FLI1	THAP9	0.339753	4.88e-15	-0.20509	0.122493	-3.84103	0.000123	#ERROR!
LOC100240735	THAP9	0.016415	0.713699	-0.49699	7.23e-05	-3.84009	0.000123	0/-
LINC01366	THAP9	0.241251	4.43e-08	-0.30532	0.019777	-3.83842	0.000124	#ERROR!
PPP1R14C	THAP9	0.192944	1.34e-05	0.639135	6.68e-08	3.83735	0.000124	#ERROR!
STYXL2	THAP9	0.186573	2.59e-05	-0.35588	0.006112	-3.83483	0.000126	#ERROR!
PAQR3	THAP9	0.392267	0	0.751019	1.12e-11	3.8339	0.000126	#ERROR!
TACSTD2	THAP9	-0.28925	3.94e-11	0.256987	0.051488	3.83267	0.000127	-/0
MFSD6L	THAP9	0.273413	4.67e-10	0.686385	2.72e-09	3.83204	0.000127	#ERROR!
MXRA8	THAP9	-0.18796	2.25e-05	0.354251	0.006367	3.83192	0.000127	-/+
KRT80	THAP9	-0.26392	1.91e-09	0.281878	0.03206	3.82859	0.000129	-/+
STRADB	THAP9	0.130557	0.003385	0.598622	6.93e-07	3.82623	0.00013	#ERROR!
FEM1B	THAP9	0.578065	0	0.839363	2.22e-16	3.82467	0.000131	#ERROR!
ITGB6	THAP9	-0.1381	0.001926	0.397308	0.002014	3.82451	0.000131	-/+
RUNDC3A	THAP9	0.045841	0.305336	0.540764	1.17e-05	3.82399	0.000131	0/+
GXYLT1	THAP9	0.539455	0	0.821887	2.66e-15	3.82301	0.000132	#ERROR!
TMEM53	THAP9	0.04012	0.369711	0.536522	1.42e-05	3.82232	0.000132	0/+
B4GALT1	THAP9	0.243387	3.34e-08	0.667866	1.02e-08	3.81817	0.000134	#ERROR!
C6orf62	THAP9	0.475673	0	0.791629	1.39e-13	3.81745	0.000135	#ERROR!
LMO2	THAP9	0.389595	0	-0.14603	0.274051	-3.81742	0.000135	#ERROR!
MAPK9	THAP9	0.56816	0	0.834607	4.44e-16	3.81694	0.000135	#ERROR!
NKX2-1-AS1	THAP9	0.356865	0	0.731027	7.24e-11	3.81223	0.000138	#ERROR!
EFR3A	THAP9	0.368582	0	0.737168	4.16e-11	3.81104	0.000138	#ERROR!
MFF	THAP9	0.522268	0	0.813369	8.66e-15	3.81093	0.000138	#ERROR!
CARD8	THAP9	0.661086	0	0.233419	0.07783	-3.80741	0.00014	#ERROR!
DCAF6	THAP9	0.377733	0	0.741675	2.74e-11	3.80633	0.000141	#ERROR!
BTF3	THAP9	0.318962	2.47e-13	0.710041	4.34e-10	3.8063	0.000141	#ERROR!
IL1RAPL2	THAP9	-0.13479	0.002476	0.397897	0.001981	3.8062	0.000141	-/+
MMGT1	THAP9	0.452473	0	0.779589	5.61e-13	3.80454	0.000142	#ERROR!
RCL1	THAP9	0.379384	0	0.742383	2.56e-11	3.80392	0.000142	#ERROR!
CRNKL1	THAP9	0.566017	0	0.833056	4.44e-16	3.80374	0.000143	#ERROR!
AHCYP5	THAP9	0.142723	0.001345	-0.39061	0.002434	-3.80254	0.000143	#ERROR!
SEMA4F	THAP9	0.166445	0.00018	0.619442	2.17e-07	3.80163	0.000144	#ERROR!
SLC3A2	THAP9	0.152817	0.000591	0.610588	3.59e-07	3.79988	0.000145	#ERROR!
APLF	THAP9	0.375288	0	0.73994	3.22e-11	3.79952	0.000145	#ERROR!
GIMAP1	THAP9	0.306926	2.07e-12	-0.23411	0.076924	-3.79886	0.000145	#ERROR!
ENOX2	THAP9	0.322096	1.39e-13	0.710985	4.01e-10	3.79547	0.000147	#ERROR!
INHBA	THAP9	-0.17605	7.32e-05	0.359548	0.005572	3.78915	0.000151	-/+
NPTXR	THAP9	-0.09481	0.033693	0.429286	0.000772	3.78812	0.000152	-/+
MRPL50	THAP9	0.63026	0	0.860566	0	3.78512	0.000154	#ERROR!
NAMPT	THAP9	-0.09101	0.041524	0.432047	0.000708	3.78511	0.000154	-/+
CLDN4	THAP9	-0.11497	0.009932	0.412083	0.001308	3.78462	0.000154	-/+
DENR	THAP9	0.489162	0	0.796235	7.9e-14	3.78242	0.000155	#ERROR!
ACTR1B	THAP9	0.348848	8.88e-16	0.724622	1.27e-10	3.78171	0.000156	#ERROR!
FUT2	THAP9	-0.1952	1.06e-05	0.34116	0.008773	3.78145	0.000156	-/+
FAM120C	THAP9	0.468202	0	0.785991	2.7e-13	3.78112	0.000156	#ERROR!
PNMA1	THAP9	0.225822	3.17e-07	0.65429	2.55e-08	3.78037	0.000157	#ERROR!
GPM6A	THAP9	0.41767	0	0.760655	4.28e-12	3.77982	0.000157	#ERROR!
EXT2	THAP9	0.468766	0	0.786083	2.67e-13	3.77783	0.000158	#ERROR!
IGF2BP2	THAP9	0.1875	2.36e-05	0.630439	1.14e-07	3.77639	0.000159	#ERROR!
KHDRBS1	THAP9	0.48372	0	0.793159	1.15e-13	3.77409	0.000161	#ERROR!
ARMCX6	THAP9	0.188039	2.23e-05	0.630501	1.13e-07	3.77327	0.000161	#ERROR!
DHRS3	THAP9	-0.11385	0.010687	0.411474	0.001332	3.77181	0.000162	-/+
GALNT1	THAP9	0.335938	1.04e-14	0.71685	2.47e-10	3.77112	0.000163	#ERROR!
CNIH1	THAP9	0.472165	0	0.787314	2.31e-13	3.77006	0.000163	#ERROR!
DMRTA2	THAP9	0.241492	4.29e-08	-0.2959	0.024118	-3.76945	0.000164	#ERROR!
PPP1R13L	THAP9	-0.01487	0.739669	0.490318	9.34e-05	3.76919	0.000164	0/+
CRIP3	THAP9	0.346065	1.33e-15	-0.18782	0.158	-3.76709	0.000165	#ERROR!
MICAL2	THAP9	-0.1639	0.000226	0.367484	0.004543	3.76616	0.000166	-/+
CDK2AP2	THAP9	0.38132	0	-0.14812	0.267169	-3.76558	0.000166	#ERROR!
NSMCE2	THAP9	0.234012	1.13e-07	0.657874	2.01e-08	3.76427	0.000167	#ERROR!
PTGFRN	THAP9	0.151066	0.000684	0.606106	4.61e-07	3.76349	0.000168	#ERROR!
LGALS9B	THAP9	-0.03684	0.410175	-0.52793	2.06e-05	-3.76279	0.000168	0/-
TCTEX1D1	THAP9	-0.11878	0.007719	0.405896	0.001571	3.76021	0.00017	-/+
MIB1	THAP9	0.472182	0	0.78676	2.46e-13	3.75996	0.00017	#ERROR!
MFAP1	THAP9	0.467046	0	0.784176	3.33e-13	3.75889	0.000171	#ERROR!
FIGN	THAP9	0.060076	0.178984	0.544053	1.01e-05	3.75826	0.000171	0/+
OLFML2A	THAP9	0.315568	4.53e-13	0.704442	6.81e-10	3.75552	0.000173	#ERROR!
MTUS1	THAP9	0.313099	7.03e-13	0.702812	7.75e-10	3.75218	0.000175	#ERROR!
SIGIRR	THAP9	0.232748	1.33e-07	-0.30193	0.021253	-3.75138	0.000176	#ERROR!
C4orf3	THAP9	0.398535	0	0.748985	1.37e-11	3.75133	0.000176	#ERROR!
FARP1	THAP9	0.35921	0	0.727882	9.57e-11	3.74789	0.000178	#ERROR!
CBLN1	THAP9	-0.22829	2.33e-07	0.305617	0.01965	3.74691	0.000179	-/+
SS18	THAP9	0.582792	0	0.838071	2.22e-16	3.74615	0.00018	#ERROR!
ATP13A4	THAP9	0.284805	8.01e-11	0.686262	2.75e-09	3.74599	0.00018	#ERROR!
CRYL1	THAP9	0.284878	7.92e-11	0.686016	2.8e-09	3.74226	0.000182	#ERROR!
LLGL1	THAP9	-0.01674	0.708236	0.485834	0.000111	3.74178	0.000183	0/+
FAXC	THAP9	-0.10337	0.020538	0.416347	0.001151	3.73949	0.000184	-/+
HLX	THAP9	0.223643	4.14e-07	-0.30901	0.018265	-3.73906	0.000185	#ERROR!
GBE1	THAP9	0.466421	0	0.78273	3.93e-13	3.73876	0.000185	#ERROR!
CCNG1	THAP9	0.322693	1.25e-13	0.70718	5.47e-10	3.73859	0.000185	#ERROR!
RNU7-151P	THAP9	0.228111	2.39e-07	-0.30442	0.020157	-3.73664	0.000186	#ERROR!
FAM172A	THAP9	0.58139	0	0.836809	4.44e-16	3.73178	0.00019	#ERROR!
RNF39	THAP9	0.024875	0.578193	0.515746	3.42e-05	3.73023	0.000191	0/+
ATP8A1	THAP9	0.396476	0	0.746432	1.75e-11	3.72846	0.000193	#ERROR!
KLK7	THAP9	-0.25463	7.18e-09	0.277448	0.034982	3.7277	0.000193	-/+
MYO3B	THAP9	0.051179	0.252382	0.534488	1.55e-05	3.72706	0.000194	0/+
LINC01679	THAP9	0.12156	0.006393	-0.39943	0.001896	-3.72671	0.000194	#ERROR!
CCDC47	THAP9	0.571484	0	0.832072	4.44e-16	3.72656	0.000194	#ERROR!
SLC12A5-AS1	THAP9	-0.15084	0.000697	-0.60251	5.61e-07	-3.72634	0.000194	-/-
GIMAP7	THAP9	0.388393	0	-0.13423	0.315103	-3.72548	0.000195	#ERROR!
IFNGR1	THAP9	0.182245	4e-05	0.622564	1.81e-07	3.72497	0.000195	#ERROR!
GOLM2	THAP9	0.579948	0	0.835856	4.44e-16	3.72496	0.000195	#ERROR!
METTL14	THAP9	0.69018	0	0.883782	0	3.7223	0.000197	#ERROR!
SLC25A17	THAP9	0.584412	0	0.837701	2.22e-16	3.72088	0.000199	#ERROR!
PSG8	THAP9	-0.33893	5.77e-15	0.188965	0.155427	3.72	0.000199	-/0
PHF13	THAP9	0.11165	0.012309	0.575529	2.29e-06	3.71646	0.000202	#ERROR!
BUB1B	THAP9	0.270204	7.57e-10	-0.2602	0.048544	-3.71488	0.000203	#ERROR!
IRF6	THAP9	0.271389	6.34e-10	0.675987	5.79e-09	3.71436	0.000204	#ERROR!
RNF144A	THAP9	0.020216	0.651366	0.510313	4.27e-05	3.71168	0.000206	0/+
CCKBR	THAP9	0.066174	0.13872	0.542974	1.06e-05	3.70593	0.000211	0/+
MAGEA12	THAP9	0.119158	0.007525	-0.39888	0.001926	-3.70558	0.000211	#ERROR!
ADAMTS7P1	THAP9	0.132153	0.003011	-0.38763	0.002644	-3.70486	0.000212	#ERROR!
MUC21	THAP9	-0.36771	0	0.15472	0.246188	3.70355	0.000213	-/0
DDO	THAP9	0.020669	0.644094	0.509698	4.38e-05	3.70291	0.000213	0/+
EPHA10	THAP9	-0.25295	9.09e-09	0.275335	0.036451	3.69973	0.000216	-/+
BAHD1	THAP9	0.31714	3.42e-13	0.701027	8.92e-10	3.69746	0.000218	#ERROR!
CDH20	THAP9	-0.07947	0.075238	0.430913	0.000733	3.69613	0.000219	0/+
IL13RA1	THAP9	0.241732	4.16e-08	0.656854	2.15e-08	3.69604	0.000219	#ERROR!
SKP1	THAP9	0.455651	0	0.774886	9.46e-13	3.69596	0.000219	#ERROR!
SLC66A3	THAP9	0.194187	1.18e-05	0.627501	1.35e-07	3.69572	0.000219	#ERROR!
CLDN10	THAP9	-0.2697	8.16e-10	0.25804	0.050506	3.69537	0.00022	-/0
PRICKLE1	THAP9	-0.02947	0.510022	0.470776	0.000192	3.69536	0.00022	0/+
KCNA1	THAP9	0.127719	0.004154	0.584151	1.48e-06	3.69381	0.000221	#ERROR!
NUDCD3	THAP9	0.323126	1.15e-13	0.704104	6.99e-10	3.69339	0.000221	#ERROR!
POLR2J3	THAP9	-0.08824	0.048159	0.423285	0.000931	3.69269	0.000222	-/+
NUP133	THAP9	0.465553	0	0.779654	5.57e-13	3.69238	0.000222	#ERROR!
NLRP4	THAP9	-0.02818	0.528747	-0.51402	3.67e-05	-3.69154	0.000223	0/-
ENPP7P1	THAP9	0.281675	1.31e-10	-0.24534	0.063421	-3.69125	0.000223	#ERROR!
JKAMP	THAP9	0.632361	0	0.857881	0	3.6911	0.000223	#ERROR!
HACD1	THAP9	-0.13146	0.003168	0.386486	0.002729	3.69089	0.000223	-/+
ARLNC1	THAP9	0.394358	0	-0.12231	0.360373	-3.69078	0.000224	#ERROR!
LRFN3	THAP9	0.245272	2.59e-08	0.658391	1.94e-08	3.68884	0.000225	#ERROR!
SH3RF3	THAP9	0.414386	0	-0.0981	0.463778	-3.68694	0.000227	#ERROR!
CAPN1	THAP9	0.149137	0.000803	0.597668	7.29e-07	3.68653	0.000227	#ERROR!
GPR161	THAP9	0.051575	0.248731	0.530464	1.84e-05	3.68595	0.000228	0/+
FRAS1	THAP9	0.304177	3.31e-12	0.692722	1.69e-09	3.68516	0.000229	#ERROR!
SCNN1A	THAP9	-0.19711	8.62e-06	0.326535	0.012361	3.68254	0.000231	-/+
AVL9	THAP9	0.447353	0	0.769872	1.63e-12	3.68224	0.000231	#ERROR!
EVL	THAP9	0.216955	9.23e-07	-0.30774	0.018772	-3.68144	0.000232	#ERROR!
ESR1	THAP9	0.12538	0.004904	0.581343	1.71e-06	3.681	0.000232	#ERROR!
DHX36	THAP9	0.625922	0	0.85462	0	3.68041	0.000233	#ERROR!
H3C4	THAP9	0.375349	0	-0.14258	0.285677	-3.67924	0.000234	#ERROR!
STX3	THAP9	0.139973	0.001668	0.590879	1.04e-06	3.67876	0.000234	#ERROR!
PHOSPHO1	THAP9	0.218275	7.89e-07	-0.30605	0.019469	-3.67811	0.000235	#ERROR!
HAUS2	THAP9	0.487813	0	0.789898	1.7e-13	3.67778	0.000235	#ERROR!
HDAC9	THAP9	0.320923	1.73e-13	-0.20232	0.127734	-3.67678	0.000236	#ERROR!
LRRC8A	THAP9	0.228209	2.36e-07	0.646887	4.11e-08	3.67541	0.000237	#ERROR!
TAB3	THAP9	0.468486	0	0.78014	5.27e-13	3.67521	0.000238	#ERROR!
PABPC4L	THAP9	0.164283	0.000218	0.606208	4.58e-07	3.67193	0.000241	#ERROR!
MIR4422HG	THAP9	-0.02497	0.576814	-0.50943	4.42e-05	-3.67108	0.000242	0/-
TARS3	THAP9	0.687519	0	0.880966	0	3.66995	0.000243	#ERROR!
HLA-V	THAP9	0.049668	0.266676	0.527341	2.11e-05	3.66938	0.000243	0/+
TCEAL2	THAP9	0.280476	1.58e-10	0.677741	5.11e-09	3.66924	0.000243	#ERROR!
GNS	THAP9	0.473608	0	0.782361	4.09e-13	3.66919	0.000243	#ERROR!
GSDME	THAP9	0.223863	4.03e-07	0.643636	5.04e-08	3.66864	0.000244	#ERROR!
CC2D1B	THAP9	0.228926	2.16e-07	0.646743	4.14e-08	3.66854	0.000244	#ERROR!
KLHL12	THAP9	0.475336	0	0.78313	3.75e-13	3.66751	0.000245	#ERROR!
MLPH	THAP9	-0.05732	0.199815	0.445429	0.000459	3.66677	0.000246	0/+
DENND10	THAP9	0.552387	0	0.820381	3.11e-15	3.66546	0.000247	#ERROR!
TIPRL	THAP9	0.542854	0	0.815861	6.22e-15	3.66509	0.000247	#ERROR!
FLG	THAP9	0.195666	1.01e-05	0.625658	1.51e-07	3.66446	0.000248	#ERROR!
RHNO1	THAP9	0.35381	4.44e-16	0.719065	2.05e-10	3.66369	0.000249	#ERROR!
MEX3D	THAP9	0.011771	0.792481	0.498646	6.78e-05	3.66244	0.00025	0/+
ABCB7	THAP9	0.359707	0	0.722212	1.57e-10	3.66226	0.00025	#ERROR!
TM7SF3	THAP9	0.250658	1.25e-08	0.659438	1.81e-08	3.66225	0.00025	#ERROR!
MEGF10	THAP9	0.051649	0.248049	0.527893	2.06e-05	3.66103	0.000251	0/+
GAREM1	THAP9	0.343963	2.22e-15	0.713374	3.3e-10	3.66045	0.000252	#ERROR!
LINC01624	THAP9	0.237622	7.12e-08	-0.28484	0.03022	-3.65879	0.000253	#ERROR!
SLC34A2	THAP9	-0.3349	1.29e-14	0.184416	0.165803	3.65665	0.000256	-/0
LMAN1	THAP9	0.509541	0	0.799403	5.33e-14	3.6564	0.000256	#ERROR!
EMP2	THAP9	-0.01958	0.661715	0.474037	0.000171	3.65637	0.000256	0/+
ARHGEF38	THAP9	-0.23078	1.71e-07	0.291023	0.026669	3.65537	0.000257	-/+
MUC3A	THAP9	0.408347	0	-0.10058	0.452516	-3.65435	0.000258	#ERROR!
ARMC9	THAP9	0.339689	4.88e-15	0.710533	4.17e-10	3.65415	0.000258	#ERROR!
BFAR	THAP9	0.39902	0	0.742905	2.44e-11	3.65368	0.000259	#ERROR!
PLCL2	THAP9	0.407742	0	-0.10089	0.451135	-3.65149	0.000261	#ERROR!
SMIM10L2A	THAP9	0.151482	0.000661	0.594847	8.48e-07	3.6402	0.000272	#ERROR!
CD1D	THAP9	0.480092	0	-0.00931	0.944719	-3.63974	0.000273	#ERROR!
HOMEZ	THAP9	0.509517	0	0.798493	6e-14	3.63941	0.000273	#ERROR!
MANBA	THAP9	0.373854	0	0.728159	9.34e-11	3.63626	0.000277	#ERROR!
ABCD3	THAP9	0.510612	0	0.798788	5.77e-14	3.63487	0.000278	#ERROR!
ECHDC1	THAP9	0.552479	0	0.818875	4e-15	3.63318	0.00028	#ERROR!
SRGAP3	THAP9	0.128535	0.003918	0.578781	1.94e-06	3.63268	0.00028	#ERROR!
SNX2	THAP9	0.482882	0	0.784914	3.06e-13	3.63221	0.000281	#ERROR!
EIF4BP2	THAP9	0.144024	0.001213	0.589096	1.15e-06	3.6318	0.000281	#ERROR!
SLC18A3	THAP9	-0.36053	0	0.152534	0.253004	3.63168	0.000282	-/0
NIPAL2	THAP9	0.175224	7.92e-05	0.609438	3.83e-07	3.62993	0.000283	#ERROR!
POT1	THAP9	0.645207	0	0.861203	0	3.62969	0.000284	#ERROR!
GTF2IP4	THAP9	0.313546	6.49e-13	0.693861	1.55e-09	3.62935	0.000284	#ERROR!
TAF5L	THAP9	0.512155	0	0.7992	5.48e-14	3.62838	0.000285	#ERROR!
FOXQ1	THAP9	-0.13092	0.003295	0.379088	0.00334	3.62787	0.000286	-/+
AK4	THAP9	-0.11593	0.009326	0.391823	0.002352	3.62607	0.000288	-/+
TCEAL5	THAP9	0.280367	1.61e-10	0.674234	6.56e-09	3.6259	0.000288	#ERROR!
EPHA3	THAP9	0.235213	9.72e-08	0.646866	4.11e-08	3.62456	0.000289	#ERROR!
CRB1	THAP9	0.245793	2.42e-08	0.653318	2.71e-08	3.62419	0.00029	#ERROR!
RAB3GAP2	THAP9	0.504612	0	0.795259	8.93e-14	3.62399	0.00029	#ERROR!
SOWAHA	THAP9	0.030603	0.493901	0.508422	4.61e-05	3.62317	0.000291	0/+
RNMT	THAP9	0.563584	0	0.823582	2.22e-15	3.62176	0.000293	#ERROR!
FAM98B	THAP9	0.507855	0	0.796696	7.48e-14	3.62098	0.000293	#ERROR!
BCAR3	THAP9	-0.00242	0.956843	0.483266	0.000122	3.62092	0.000294	0/+
PPM1E	THAP9	0.481355	0	-0.00485	0.971166	-3.62052	0.000294	#ERROR!
PKM	THAP9	-0.11699	0.008697	0.389996	0.002476	3.61866	0.000296	-/+
CHCHD7	THAP9	0.383821	0	0.732343	6.44e-11	3.61799	0.000297	#ERROR!
PEG10	THAP9	0.09846	0.027391	0.55654	5.72e-06	3.6166	0.000298	#ERROR!
ARMCX5	THAP9	0.701523	0	0.885192	0	3.61621	0.000299	#ERROR!
CYP39A1	THAP9	0.431493	0	0.75766	5.8e-12	3.6162	0.000299	#ERROR!
SMIM43	THAP9	0.193072	1.32e-05	-0.32142	0.013886	-3.61473	0.000301	#ERROR!
GJB4	THAP9	-0.14452	0.001166	0.365412	0.004794	3.61409	0.000301	-/+
ARHGAP1	THAP9	0.208535	2.45e-06	0.629199	1.22e-07	3.61266	0.000303	#ERROR!
PPP6C	THAP9	0.606496	0	0.843054	0	3.6115	0.000304	#ERROR!
CHM	THAP9	0.504056	0	0.794297	1e-13	3.61122	0.000305	#ERROR!
CCDC18	THAP9	0.450239	0	-0.04258	0.750956	-3.6069	0.00031	#ERROR!
AADAT	THAP9	0.49502	0	0.789504	1.79e-13	3.60565	0.000311	#ERROR!
NUDT17	THAP9	0.187971	2.25e-05	0.615445	2.73e-07	3.60553	0.000312	#ERROR!
KIAA1522	THAP9	0.324016	9.81e-14	0.698044	1.13e-09	3.60512	0.000312	#ERROR!
RAB23	THAP9	0.332135	2.15e-14	0.702638	7.86e-10	3.60457	0.000313	#ERROR!
ANOS1	THAP9	0.237572	7.17e-08	0.646374	4.24e-08	3.6017	0.000316	#ERROR!
CEP170B	THAP9	0.064764	0.147347	0.530823	1.82e-05	3.5989	0.00032	0/+
DDX39A	THAP9	0.143761	0.001239	-0.36345	0.005043	-3.5933	0.000327	#ERROR!
KCNV1	THAP9	0.091287	0.040905	0.549145	8.05e-06	3.59328	0.000327	#ERROR!
STK24	THAP9	0.30402	3.4e-12	0.685462	2.92e-09	3.59183	0.000328	#ERROR!
PRKCB	THAP9	0.129389	0.003684	-0.37588	0.00364	-3.59164	0.000329	#ERROR!
IQGAP1	THAP9	0.182053	4.08e-05	0.610311	3.65e-07	3.59121	0.000329	#ERROR!
IL18BP	THAP9	0.135674	0.002317	-0.37028	0.004223	-3.59086	0.00033	#ERROR!
IGFBP5	THAP9	0.073028	0.10219	0.535837	1.46e-05	3.59003	0.000331	0/+
LUCAT1	THAP9	-0.12979	0.00358	0.375287	0.003699	3.58967	0.000331	-/+
H2AC17	THAP9	0.445568	0	-0.04575	0.733115	-3.58863	0.000332	#ERROR!
KLHL13	THAP9	-0.09608	0.031363	0.404052	0.001658	3.58815	0.000333	-/+
PLXDC2	THAP9	0.200107	6.24e-06	0.621632	1.91e-07	3.58782	0.000333	#ERROR!
SEC22C	THAP9	0.617671	0	0.84711	0	3.58633	0.000335	#ERROR!
CELSR2	THAP9	0.280421	1.59e-10	0.671035	8.21e-09	3.58555	0.000336	#ERROR!
MLKL	THAP9	0.174796	8.25e-05	-0.33448	0.01028	-3.5855	0.000336	#ERROR!
CRYZL1	THAP9	0.640022	0	0.857125	0	3.58359	0.000339	#ERROR!
CPNE4	THAP9	-0.25458	7.23e-09	0.257817	0.050713	3.58276	0.00034	-/0
SLC35A3	THAP9	0.518401	0	0.799815	5.06e-14	3.5819	0.000341	#ERROR!
CLEC9A	THAP9	0.052988	0.235981	-0.43893	0.000567	-3.58187	0.000341	0/-
SRP68	THAP9	0.379177	0	0.727236	1.01e-10	3.58045	0.000343	#ERROR!
CRYZL2P	THAP9	0.228098	2.39e-07	0.638643	6.89e-08	3.58016	0.000343	#ERROR!
NUCKS1	THAP9	0.631561	0	0.853113	0	3.57863	0.000345	#ERROR!
CPPED1	THAP9	0.338363	6.66e-15	0.704264	6.91e-10	3.5786	0.000345	#ERROR!
FBXW11	THAP9	0.458303	0	0.769299	1.73e-12	3.57847	0.000346	#ERROR!
FAM167B	THAP9	0.32969	3.42e-14	-0.17886	0.179142	-3.57739	0.000347	#ERROR!
ADAM9	THAP9	0.477055	0	0.778774	6.15e-13	3.57597	0.000349	#ERROR!
IGFL4	THAP9	-0.1088	0.014733	0.391488	0.002375	3.57396	0.000352	-/+
HOOK3	THAP9	0.357771	0	0.71485	2.92e-10	3.5734	0.000352	#ERROR!
MLC1	THAP9	0.054261	0.2249	-0.4367	0.00061	-3.57169	0.000355	0/-
SDF2L1	THAP9	0.389481	0	-0.11077	0.40778	-3.57142	0.000355	#ERROR!
DMD	THAP9	0.201531	5.34e-06	0.621016	1.98e-07	3.57083	0.000356	#ERROR!
HSF2	THAP9	0.543366	0	0.811444	1.11e-14	3.57077	0.000356	#ERROR!
CD72	THAP9	0.142972	0.001319	-0.36107	0.00536	-3.56904	0.000358	#ERROR!
FBXW8	THAP9	0.541173	0	0.810223	1.33e-14	3.56764	0.00036	#ERROR!
HNRNPA1	THAP9	0.341437	3.55e-15	0.70515	6.44e-10	3.56687	0.000361	#ERROR!
GOLGA4	THAP9	0.546257	0	0.812631	9.55e-15	3.56649	0.000362	#ERROR!
S100A6	THAP9	-0.38573	0	0.114341	0.392746	3.56596	0.000363	-/0
CDC37L1	THAP9	0.60371	0	0.839806	2.22e-16	3.56551	0.000363	#ERROR!
LMBR1	THAP9	0.606388	0	0.841024	0	3.56496	0.000364	#ERROR!
APOD	THAP9	-0.16332	0.000238	0.342162	0.008564	3.564	0.000365	-/+
LOC283710	THAP9	0.047541	0.287732	-0.44102	0.00053	-3.56224	0.000368	0/-
ERG28	THAP9	0.45401	0	0.766039	2.45e-12	3.56125	0.000369	#ERROR!
COPG2	THAP9	0.377658	0	0.724991	1.23e-10	3.5601	0.000371	#ERROR!
GTF2F2	THAP9	0.215007	1.16e-06	0.628634	1.27e-07	3.55995	0.000371	#ERROR!
ST6GAL1	THAP9	0.372579	0	-0.12855	0.336192	-3.55956	0.000371	#ERROR!
RSRC1	THAP9	0.624576	0	0.849158	0	3.55936	0.000372	#ERROR!
KCNK10	THAP9	0.369761	0	-0.13155	0.324965	-3.55804	0.000374	#ERROR!
KEL	THAP9	0.218986	7.25e-07	-0.28901	0.027783	-3.55544	0.000377	#ERROR!
RPF2	THAP9	0.402666	0	0.738341	3.73e-11	3.55487	0.000378	#ERROR!
MPZL2	THAP9	-0.02522	0.572996	0.45798	0.0003	3.55471	0.000378	0/+
POLR2C	THAP9	0.524365	0	0.80131	4.2e-14	3.55437	0.000379	#ERROR!
KIAA1586	THAP9	0.6288	0	0.850884	0	3.55436	0.000379	#ERROR!
SLA	THAP9	0.357224	0	-0.14513	0.277032	-3.55398	0.000379	#ERROR!
ENPP5	THAP9	0.487384	0	0.782607	3.98e-13	3.55107	0.000384	#ERROR!
IKBIP	THAP9	0.361012	0	0.715066	2.87e-10	3.55096	0.000384	#ERROR!
IMPDH2	THAP9	0.096998	0.029782	0.548757	8.2e-06	3.55009	0.000385	#ERROR!
NBPF14	THAP9	0.172106	0.000106	0.599905	6.47e-07	3.54917	0.000386	#ERROR!
ASPH	THAP9	0.576614	0	0.82635	1.33e-15	3.54904	0.000387	#ERROR!
CCDC169	THAP9	0.12511	0.004998	0.568064	3.3e-06	3.54732	0.000389	#ERROR!
SLC10A4	THAP9	0.53631	0	0.080151	0.549782	-3.54558	0.000392	#ERROR!
ANXA2	THAP9	-0.28518	7.55e-11	0.221576	0.094605	3.5455	0.000392	-/0
HACE1	THAP9	0.558389	0	0.817442	4.88e-15	3.54512	0.000392	#ERROR!
AP2B1	THAP9	0.424124	0	0.749262	1.33e-11	3.54505	0.000393	#ERROR!
EAF2	THAP9	0.140335	0.001621	-0.36034	0.00546	-3.54495	0.000393	#ERROR!
KIR2DL1	THAP9	0.032132	0.47256	-0.45116	0.000379	-3.54326	0.000395	0/-
CRISPLD2	THAP9	-0.10374	0.020077	0.391971	0.002343	3.5429	0.000396	-/+
SAMD7	THAP9	0.044368	0.321149	-0.44116	0.000528	-3.54167	0.000398	0/-
FAM160A1	THAP9	0.329212	3.73e-14	0.696229	1.3e-09	3.54122	0.000398	#ERROR!
IGSF11	THAP9	0.027122	0.544328	0.496838	7.28e-05	3.54102	0.000399	0/+
ST3GAL5	THAP9	0.223888	4.01e-07	0.632583	9.98e-08	3.54098	0.000399	#ERROR!
RBP5	THAP9	0.264241	1.82e-09	-0.24219	0.066998	-3.5396	0.000401	#ERROR!
ANKH	THAP9	0.091226	0.04104	0.543559	1.04e-05	3.53926	0.000401	#ERROR!
SLC44A1	THAP9	0.386242	0	0.728282	9.24e-11	3.53906	0.000402	#ERROR!
SLC35E1	THAP9	0.395703	0	0.733385	5.86e-11	3.53759	0.000404	#ERROR!
DPEP3	THAP9	0.088498	0.047504	-0.40425	0.001649	-3.53744	0.000404	#ERROR!
AIRE	THAP9	0.099856	0.025266	-0.39449	0.002182	-3.53643	0.000406	#ERROR!
NPC1	THAP9	-0.10218	0.022038	0.392285	0.002322	3.53465	0.000408	-/+
COL8A2	THAP9	-0.20275	4.67e-06	0.301526	0.021438	3.53299	0.000411	-/+
SEMA4A	THAP9	0.252532	9.62e-09	0.649768	3.41e-08	3.53289	0.000411	#ERROR!
CAVIN1	THAP9	-0.04186	0.349346	0.442014	0.000513	3.53173	0.000413	0/+
H3C8	THAP9	0.598031	0	0.171768	0.197303	-3.53158	0.000413	#ERROR!
CCDC6	THAP9	0.320236	1.96e-13	0.69023	2.04e-09	3.53087	0.000414	#ERROR!
RFX8	THAP9	0.388301	0	-0.10624	0.427351	-3.53056	0.000415	#ERROR!
RCN1	THAP9	0.192087	1.47e-05	0.611142	3.48e-07	3.52919	0.000417	#ERROR!
CRB3	THAP9	0.013867	0.75661	0.485204	0.000113	3.52687	0.000421	0/+
RNASE1	THAP9	0.182722	3.81e-05	-0.31937	0.014539	-3.52577	0.000422	#ERROR!
LGR4	THAP9	0.491749	0	0.783346	3.66e-13	3.52487	0.000424	#ERROR!
CLOCK	THAP9	0.577493	0	0.825643	1.55e-15	3.5248	0.000424	#ERROR!
BTC	THAP9	0.25504	6.79e-09	0.650593	3.24e-08	3.52434	0.000425	#ERROR!
DEK	THAP9	0.60378	0	0.83804	2.22e-16	3.52399	0.000425	#ERROR!
SH2D4A	THAP9	0.149647	0.00077	0.582503	1.61e-06	3.52389	0.000425	#ERROR!
DNAH2	THAP9	0.114112	0.010506	0.558017	5.34e-06	3.52303	0.000427	#ERROR!
NEB	THAP9	0.536431	0	0.083641	0.532484	-3.52273	0.000427	#ERROR!
EID1	THAP9	0.663467	0	0.865295	0	3.52114	0.00043	#ERROR!
B4GALT4	THAP9	0.537776	0	0.806183	2.24e-14	3.52077	0.00043	#ERROR!
FBXL16	THAP9	0.06011	0.17874	0.519072	2.98e-05	3.51994	0.000432	0/+
KCMF1	THAP9	0.565336	0	0.819552	3.55e-15	3.51942	0.000432	#ERROR!
MANF	THAP9	0.467901	0	-0.00738	0.956136	-3.51909	0.000433	#ERROR!
BPNT1	THAP9	0.338147	6.66e-15	0.699562	1e-09	3.5169	0.000437	#ERROR!
OPA1	THAP9	0.585462	0	0.829057	8.88e-16	3.51649	0.000437	#ERROR!
LRAT	THAP9	0.444613	0	0.758329	5.42e-12	3.51597	0.000438	#ERROR!
C22orf34	THAP9	0.270902	6.82e-10	-0.23215	0.079509	-3.5159	0.000438	#ERROR!
DPF3	THAP9	0.386416	0	-0.10622	0.427456	-3.51523	0.000439	#ERROR!
INKA1	THAP9	0.247418	1.94e-08	-0.25572	0.052694	-3.5151	0.00044	#ERROR!
MIR576	THAP9	0.129046	0.003777	-0.36651	0.00466	-3.51491	0.00044	#ERROR!
AIMP1	THAP9	0.591219	0	0.831713	6.66e-16	3.51477	0.00044	#ERROR!
IGF2	THAP9	-0.15725	0.000405	0.341147	0.008776	3.51358	0.000442	-/+
NUDT10	THAP9	0.087016	0.05136	0.537801	1.34e-05	3.51265	0.000444	0/+
MAP4K3-DT	THAP9	0.429755	0	0.750165	1.22e-11	3.51208	0.000445	#ERROR!
KCNK1	THAP9	0.143074	0.001308	0.576885	2.14e-06	3.51195	0.000445	#ERROR!
ADAP2	THAP9	0.031814	0.47695	-0.44773	0.000425	-3.51167	0.000445	0/-
ARPP19	THAP9	0.496506	0	0.784945	3.04e-13	3.51024	0.000448	#ERROR!
NALCN-AS1	THAP9	-0.14478	0.001143	0.351906	0.00675	3.5099	0.000448	-/+
FAM114A1	THAP9	0.11255	0.011621	0.555556	5.99e-06	3.50946	0.000449	#ERROR!
ATF1	THAP9	0.496763	0	0.784988	3.03e-13	3.50867	0.00045	#ERROR!
PTPRK	THAP9	0.227227	2.66e-07	0.631854	1.04e-07	3.50864	0.00045	#ERROR!
ARMCX2	THAP9	0.45509	0	0.763135	3.31e-12	3.50417	0.000458	#ERROR!
M6PR	THAP9	0.426239	0	0.747766	1.54e-11	3.50415	0.000458	#ERROR!
INTS14	THAP9	0.569645	0	0.8209	3.11e-15	3.50413	0.000458	#ERROR!
SOX18	THAP9	0.274627	3.89e-10	-0.22669	0.087046	-3.50402	0.000458	#ERROR!
CDYL	THAP9	0.313862	6.14e-13	0.684176	3.21e-09	3.50088	0.000464	#ERROR!
ARFGEF1	THAP9	0.393188	0	0.729451	8.33e-11	3.50013	0.000465	#ERROR!
TAX1BP3	THAP9	-0.1403	0.001626	0.354458	0.006334	3.49858	0.000468	-/+
MAP3K1	THAP9	0.244009	3.07e-08	0.641504	5.77e-08	3.4981	0.000469	#ERROR!
C1orf115	THAP9	0.144848	0.001136	0.576575	2.17e-06	3.4964	0.000472	#ERROR!
GIPC3	THAP9	0.464327	0	-0.00854	0.949287	-3.49577	0.000473	#ERROR!
PACRG	THAP9	0.408881	0	0.737759	3.94e-11	3.49527	0.000474	#ERROR!
PPM1A	THAP9	0.606059	0	0.837825	2.22e-16	3.49447	0.000475	#ERROR!
HOMER2	THAP9	0.373732	0	0.718131	2.22e-10	3.49352	0.000477	#ERROR!
MEF2C	THAP9	0.579232	0	0.14935	0.263163	-3.49222	0.000479	#ERROR!
EIF3E	THAP9	0.395488	0	0.730128	7.85e-11	3.49141	0.00048	#ERROR!
SLC35A2	THAP9	0.349719	6.66e-16	0.704321	6.87e-10	3.49132	0.000481	#ERROR!
LINC02724	THAP9	0.048923	0.273933	-0.43139	0.000722	-3.49041	0.000482	0/-
PHYHD1	THAP9	0.203531	4.29e-06	0.614966	2.81e-07	3.48964	0.000484	#ERROR!
RSPO4	THAP9	-0.20056	5.94e-06	0.297603	0.02328	3.48796	0.000487	-/+
CHIAP2	THAP9	-0.28005	1.69e-10	0.218655	0.099149	3.48641	0.00049	-/0
AMD1	THAP9	0.502614	0	0.786668	2.49e-13	3.48538	0.000491	#ERROR!
FXR1	THAP9	0.517931	0	0.794389	9.93e-14	3.48454	0.000493	#ERROR!
FGD3	THAP9	0.061103	0.171656	-0.42065	0.00101	-3.4842	0.000494	0/-
H2AC4	THAP9	0.117114	0.008627	-0.37306	0.003924	-3.48396	0.000494	#ERROR!
DDA1	THAP9	0.082455	0.064895	0.531508	1.76e-05	3.48381	0.000494	0/+
APCDD1	THAP9	0.101684	0.022697	0.545253	9.61e-06	3.48356	0.000495	#ERROR!
ACTL6A	THAP9	0.394824	0	0.72912	8.58e-11	3.48205	0.000498	#ERROR!
MZT1	THAP9	0.315523	4.57e-13	0.683664	3.33e-09	3.48171	0.000498	#ERROR!
RSL1D1	THAP9	0.399882	0	0.731893	6.71e-11	3.48163	0.000498	#ERROR!
C11orf49	THAP9	0.312441	7.89e-13	0.681822	3.81e-09	3.4815	0.000499	#ERROR!
EIF4EBP2	THAP9	0.399578	0	0.731708	6.82e-11	3.48139	0.000499	#ERROR!
IGF2R	THAP9	0.139741	0.001698	0.571552	2.79e-06	3.48081	0.0005	#ERROR!
LOC101928847	THAP9	0.308984	1.45e-12	0.679543	4.49e-09	3.47863	0.000504	#ERROR!
CTTNBP2	THAP9	0.077867	0.081347	0.527624	2.08e-05	3.47848	0.000504	0/+
SH3GLB1	THAP9	0.529447	0	0.799834	5.06e-14	3.47816	0.000505	#ERROR!
KRR1	THAP9	0.683285	0	0.872629	0	3.47798	0.000505	#ERROR!
RRN3	THAP9	0.600766	0	0.834502	4.44e-16	3.47587	0.000509	#ERROR!
STK10	THAP9	0.212559	1.54e-06	-0.28442	0.030476	-3.47516	0.000511	#ERROR!
ANO6	THAP9	0.150919	0.000693	0.578473	1.97e-06	3.47344	0.000514	#ERROR!
NELL1	THAP9	0.277118	2.66e-10	-0.21962	0.097632	-3.47158	0.000517	#ERROR!
NORAD	THAP9	0.518395	0	0.793805	1.07e-13	3.46939	0.000522	#ERROR!
RARS2	THAP9	0.518222	0	0.793583	1.09e-13	3.46691	0.000526	#ERROR!
RNF121	THAP9	0.472252	0	0.769884	1.63e-12	3.46655	0.000527	#ERROR!
ANKRD18DP	THAP9	0.267346	1.16e-09	-0.2289	0.083928	-3.46624	0.000528	#ERROR!
CHMP4C	THAP9	0.374472	0	0.71645	2.55e-10	3.46396	0.000532	#ERROR!
MAPK12	THAP9	0.171872	0.000109	-0.32119	0.013956	-3.46309	0.000534	#ERROR!
DNAAF5	THAP9	0.469683	0	0.768315	1.92e-12	3.46287	0.000534	#ERROR!
FAM110B	THAP9	0.072087	0.106697	0.521695	2.67e-05	3.46229	0.000536	0/+
EFEMP2	THAP9	0.304236	3.28e-12	0.675372	6.05e-09	3.46175	0.000537	#ERROR!
KRT7	THAP9	-0.02695	0.54683	0.445613	0.000456	3.46038	0.000539	0/+
PDCD10	THAP9	0.396677	0	0.728643	8.95e-11	3.46007	0.00054	#ERROR!
TCAF2	THAP9	0.393073	0	-0.09021	0.500689	-3.45838	0.000543	#ERROR!
HMGB3	THAP9	0.246746	2.13e-08	0.639781	6.42e-08	3.45822	0.000544	#ERROR!
MAGEF1	THAP9	0.289135	4.01e-11	0.665959	1.17e-08	3.45799	0.000544	#ERROR!
AGRN	THAP9	0.187852	2.27e-05	0.601707	5.86e-07	3.4572	0.000546	#ERROR!
LINC01275	THAP9	0.390089	0	-0.09337	0.485738	-3.45607	0.000548	#ERROR!
MPP7	THAP9	0.253537	8.37e-09	0.643718	5.02e-08	3.45446	0.000551	#ERROR!
APBB1	THAP9	0.304042	3.39e-12	0.674614	6.38e-09	3.45369	0.000553	#ERROR!
METAP2	THAP9	0.504168	0	0.785622	2.82e-13	3.45243	0.000556	#ERROR!
ORC4	THAP9	0.657629	0	0.860061	0	3.45203	0.000556	#ERROR!
RHOBTB3	THAP9	0.21976	6.61e-07	0.622032	1.87e-07	3.45172	0.000557	#ERROR!
BMPR1B	THAP9	-0.05076	0.256292	0.425227	0.000877	3.45139	0.000558	0/+
CACTIN-AS1	THAP9	0.446715	0	-0.02424	0.856675	-3.45121	0.000558	#ERROR!
REM1	THAP9	0.272551	5.32e-10	-0.22138	0.094901	-3.45049	0.00056	#ERROR!
TM9SF3	THAP9	0.607861	0	0.836745	4.44e-16	3.45028	0.00056	#ERROR!
PRPF40A	THAP9	0.52057	0	0.793866	1.06e-13	3.45016	0.00056	#ERROR!
ANG	THAP9	-0.12116	0.00657	0.365232	0.004816	3.45009	0.00056	-/+
RBM8A	THAP9	0.529	0	0.798111	6.26e-14	3.44984	0.000561	#ERROR!
CCDC69	THAP9	0.167798	0.000159	-0.32319	0.013341	-3.44963	0.000561	#ERROR!
SUSD4	THAP9	-0.09745	0.029017	0.385769	0.002784	3.44951	0.000562	-/+
PDP1	THAP9	0.165222	0.000201	0.585794	1.36e-06	3.44885	0.000563	#ERROR!
PLEKHG4	THAP9	0.025966	0.561624	0.48568	0.000111	3.44838	0.000564	0/+
MXRA5	THAP9	0.008599	0.84759	0.472284	0.000182	3.44829	0.000564	0/+
JUP	THAP9	0.220102	6.35e-07	0.621816	1.89e-07	3.44686	0.000567	#ERROR!
NRIP1	THAP9	0.101269	0.023259	0.541159	1.15e-05	3.44672	0.000567	#ERROR!
TMEM236	THAP9	-0.23449	1.07e-07	0.259121	0.049514	3.44619	0.000569	-/+
GIMAP4	THAP9	0.302156	4.67e-12	-0.1898	0.153577	-3.44565	0.00057	#ERROR!
FCF1	THAP9	0.625922	0	0.845023	0	3.44416	0.000573	#ERROR!
MBOAT7	THAP9	0.137736	0.001981	0.566507	3.56e-06	3.44378	0.000574	#ERROR!
KRT25	THAP9	0.168968	0.000143	-0.3213	0.013921	-3.44348	0.000574	#ERROR!
CPVL	THAP9	0.393147	0	0.725514	1.18e-10	3.44328	0.000575	#ERROR!
SYPL1	THAP9	0.626752	0	0.845361	0	3.44292	0.000575	#ERROR!
MXRA5Y	THAP9	0.087972	0.048844	0.531177	1.79e-05	3.44267	0.000576	#ERROR!
FOXRED2	THAP9	0.317049	3.48e-13	0.681427	3.92e-09	3.44149	0.000579	#ERROR!
PTPN14	THAP9	0.326042	6.75e-14	0.686754	2.65e-09	3.44137	0.000579	#ERROR!
RBPJ	THAP9	0.440154	0	0.75115	1.11e-11	3.43982	0.000582	#ERROR!
OR2AF1P	THAP9	0.274668	3.86e-10	-0.21759	0.100848	-3.43888	0.000584	#ERROR!
ASAP2	THAP9	0.193647	1.25e-05	0.603728	5.25e-07	3.43779	0.000586	#ERROR!
PYY	THAP9	0.450015	0	-0.01808	0.89287	-3.43729	0.000588	#ERROR!
SLC4A1AP	THAP9	0.489463	0	0.77707	7.43e-13	3.4358	0.000591	#ERROR!
TM9SF2	THAP9	0.562341	0	0.814015	7.99e-15	3.43571	0.000591	#ERROR!
MIR571	THAP9	0.197808	8e-06	-0.29311	0.025553	-3.43466	0.000593	#ERROR!
NLRC3	THAP9	0.276883	2.75e-10	-0.2143	0.106225	-3.43172	0.0006	#ERROR!
PREX1	THAP9	0.320476	1.87e-13	-0.16805	0.207321	-3.43073	0.000602	#ERROR!
SCAMP1	THAP9	0.497547	0	0.780946	4.81e-13	3.43014	0.000603	#ERROR!
NFAM1	THAP9	0.102753	0.021303	-0.37863	0.003381	-3.42896	0.000606	#ERROR!
MFSD1	THAP9	0.413965	0	0.736065	4.6e-11	3.42808	0.000608	#ERROR!
KLF2	THAP9	0.146649	0.000983	-0.33964	0.009098	-3.42774	0.000609	#ERROR!
SHC1	THAP9	0.269962	7.85e-10	0.651603	3.03e-08	3.42677	0.000611	#ERROR!
ANO5	THAP9	0.442427	0	0.75153	1.07e-11	3.4265	0.000611	#ERROR!
CLDN8	THAP9	0.175956	7.39e-05	0.59087	1.05e-06	3.42634	0.000612	#ERROR!
MFNG	THAP9	0.138311	0.001896	-0.34694	0.007628	-3.42609	0.000612	#ERROR!
SLC2A1	THAP9	0.109107	0.014454	0.544543	9.92e-06	3.42534	0.000614	#ERROR!
SH3BGRL2	THAP9	0.480846	0	0.771933	1.31e-12	3.42507	0.000615	#ERROR!
PDLIM5	THAP9	0.386495	0	0.7205	1.81e-10	3.42507	0.000615	#ERROR!
DVL1	THAP9	-0.02055	0.645973	0.446598	0.000441	3.42498	0.000615	0/+
PIGK	THAP9	0.644074	0	0.852696	0	3.42393	0.000617	#ERROR!
SLC24A3	THAP9	0.388212	0	0.721322	1.69e-10	3.42297	0.000619	#ERROR!
HDGFL3	THAP9	0.640709	0	0.851083	0	3.42291	0.00062	#ERROR!
GOLGA7	THAP9	0.605108	0	0.834146	4.44e-16	3.42123	0.000623	#ERROR!
SPSB1	THAP9	-0.01229	0.78348	0.452627	0.000361	3.42018	0.000626	0/+
DLEU2	THAP9	0.359672	0	-0.12269	0.358865	-3.41696	0.000633	#ERROR!
FKBP7	THAP9	0.401886	0	0.728577	9e-11	3.41675	0.000634	#ERROR!
CD27	THAP9	0.120623	0.006815	-0.36145	0.005308	-3.41656	0.000634	#ERROR!
RGL4	THAP9	0.147811	0.000895	-0.33701	0.009685	-3.41555	0.000637	#ERROR!
CLTCL1	THAP9	0.526548	0	0.794986	9.24e-14	3.41461	0.000639	#ERROR!
ENDOD1	THAP9	-0.07436	0.096064	0.400917	0.001816	3.41297	0.000643	0/+
CPEB1	THAP9	0.075164	0.092521	0.518665	3.03e-05	3.41275	0.000643	0/+
PTPRN	THAP9	-0.28608	6.54e-11	0.202059	0.128241	3.4125	0.000644	-/0
CYSRT1	THAP9	-0.11805	0.008107	0.362894	0.005115	3.41007	0.000649	-/+
RAB4A	THAP9	0.436309	0	0.747131	1.63e-11	3.40975	0.00065	#ERROR!
CYSLTR1	THAP9	0.273566	4.57e-10	-0.21453	0.10585	-3.4088	0.000652	#ERROR!
MOB4	THAP9	0.621677	0	0.841485	0	3.40795	0.000655	#ERROR!
PLEKHA6	THAP9	-0.17881	5.61e-05	0.30738	0.01892	3.40724	0.000656	-/+
KCNK15	THAP9	-0.14982	0.000759	0.333979	0.010402	3.40623	0.000659	-/+
MDFIC	THAP9	0.029985	0.502668	0.484035	0.000118	3.40618	0.000659	0/+
BROX	THAP9	0.449846	0	0.754207	8.19e-12	3.40541	0.000661	#ERROR!
RBPMS	THAP9	0.310568	1.1e-12	0.674603	6.39e-09	3.40429	0.000663	#ERROR!
PGR	THAP9	-0.14059	0.00159	0.342034	0.008591	3.40395	0.000664	-/+
ANKLE2	THAP9	0.180608	4.7e-05	0.591824	9.94e-07	3.40352	0.000665	#ERROR!
ADGRF4	THAP9	-0.30779	1.78e-12	0.177688	0.182067	3.40243	0.000668	-/0
TLCD2	THAP9	0.135392	0.002366	0.560517	4.74e-06	3.40011	0.000674	#ERROR!
RASGRP2	THAP9	0.077623	0.082307	-0.39646	0.002063	-3.39919	0.000676	0/-
BAG6	THAP9	0.319064	2.42e-13	0.679279	4.58e-09	3.39882	0.000677	#ERROR!
BAIAP2	THAP9	0.003365	0.940054	0.462423	0.000258	3.39783	0.000679	0/+
HSPA5P1	THAP9	0.458561	0	-0.00119	0.992956	-3.39542	0.000685	#ERROR!
FN1	THAP9	-0.36196	0	0.116433	0.384088	3.39153	0.000695	-/0
RNF128	THAP9	0.403149	0	0.727544	9.86e-11	3.39141	0.000695	#ERROR!
SLC1A7	THAP9	-0.15267	0.000599	0.329364	0.011582	3.39074	0.000697	-/+
CALM2	THAP9	0.248869	1.59e-08	0.635259	8.48e-08	3.39067	0.000697	#ERROR!
RBM17	THAP9	0.261751	2.61e-09	0.643359	5.13e-08	3.39012	0.000699	#ERROR!
CDC42EP4	THAP9	0.215408	1.11e-06	0.613634	3.03e-07	3.39009	0.000699	#ERROR!
SLC16A9	THAP9	0.311395	9.49e-13	0.673963	6.68e-09	3.38999	0.000699	#ERROR!
SBDS	THAP9	0.387626	0	0.718665	2.12e-10	3.38997	0.000699	#ERROR!
OAS2	THAP9	0.133058	0.002817	-0.34696	0.007624	-3.3897	0.0007	#ERROR!
RCHY1	THAP9	0.69788	0	0.876123	0	3.38863	0.000702	#ERROR!
PODN	THAP9	-0.15756	0.000395	0.324412	0.012975	3.38711	0.000706	-/+
AHCTF1	THAP9	0.617882	0	0.838747	2.22e-16	3.38646	0.000708	#ERROR!
MGRN1	THAP9	0.244782	2.77e-08	0.632275	1.02e-07	3.38633	0.000708	#ERROR!
DPY19L1	THAP9	0.074789	0.094161	0.51545	3.46e-05	3.38532	0.000711	0/+
HGSNAT	THAP9	0.366738	0	0.706226	5.9e-10	3.38375	0.000715	#ERROR!
RFT1	THAP9	0.6539	0	0.855649	0	3.38254	0.000718	#ERROR!
SLCO3A1	THAP9	0.291041	2.95e-11	0.660668	1.67e-08	3.37917	0.000727	#ERROR!
NEK7	THAP9	0.428751	0	0.740956	2.93e-11	3.37873	0.000728	#ERROR!
DBH-AS1	THAP9	0.036611	0.413066	-0.42808	0.000802	-3.37833	0.000729	0/-
ARHGDIB	THAP9	0.066801	0.135008	-0.40298	0.001711	-3.37783	0.000731	0/-
CSNK2A1	THAP9	0.589394	0	0.824535	1.78e-15	3.37774	0.000731	#ERROR!
CTNNB1	THAP9	0.275251	3.53e-10	0.650609	3.23e-08	3.3759	0.000736	#ERROR!
SLC15A4	THAP9	0.233527	1.21e-07	0.624112	1.65e-07	3.37575	0.000736	#ERROR!
PLK1	THAP9	0.123426	0.005621	-0.35364	0.006465	-3.3748	0.000739	#ERROR!
PSAP	THAP9	0.028092	0.530026	0.47899	0.000143	3.37423	0.00074	0/+
RN7SL854P	THAP9	0.046956	0.293704	-0.41903	0.001061	-3.37379	0.000741	0/-
CUL5	THAP9	0.67042	0	0.863001	0	3.37359	0.000742	#ERROR!
PHAX	THAP9	0.58223	0	0.820764	3.11e-15	3.37255	0.000745	#ERROR!
SLC9A7P1	THAP9	0.130555	0.003385	0.554298	6.35e-06	3.37209	0.000746	#ERROR!
LSM14A	THAP9	0.62935	0	0.84359	0	3.37138	0.000748	#ERROR!
PARP11-AS1	THAP9	0.15179	0.000644	-0.32741	0.012115	-3.36962	0.000753	#ERROR!
PEX7	THAP9	0.35234	4.44e-16	0.696701	1.25e-09	3.36859	0.000756	#ERROR!
PECR	THAP9	0.420788	0	0.73585	4.69e-11	3.36839	0.000756	#ERROR!
MAIP1	THAP9	0.488471	0	0.77256	1.22e-12	3.36756	0.000758	#ERROR!
COL16A1	THAP9	-0.11534	0.0097	0.359819	0.005533	3.3671	0.00076	-/+
LOC101929227	THAP9	0.331261	2.53e-14	-0.14708	0.270557	-3.36623	0.000762	#ERROR!
RAB33B	THAP9	0.45092	0	0.752226	9.96e-12	3.36491	0.000766	#ERROR!
LINC01926	THAP9	-0.10072	0.024024	-0.53224	1.71e-05	-3.36491	0.000766	-/-
FGGY	THAP9	0.379631	0	0.712216	3.63e-10	3.36374	0.000769	#ERROR!
SUCLA2	THAP9	0.637512	0	0.847158	0	3.36369	0.000769	#ERROR!
DAZAP2	THAP9	0.537646	0	0.797865	6.48e-14	3.36261	0.000772	#ERROR!
RAB3IP	THAP9	0.522145	0	0.789848	1.71e-13	3.36173	0.000775	#ERROR!
DPY19L2P3	THAP9	0.416937	0	0.733221	5.95e-11	3.36128	0.000776	#ERROR!
GCA	THAP9	0.374789	0	0.709221	4.64e-10	3.36096	0.000777	#ERROR!
GNB5	THAP9	0.361814	0	0.701643	8.5e-10	3.36045	0.000778	#ERROR!
GLCE	THAP9	0.277978	2.33e-10	0.650957	3.16e-08	3.35985	0.00078	#ERROR!
CLDN9	THAP9	-0.16758	0.000162	0.311567	0.017277	3.35974	0.00078	-/+
DERL3	THAP9	0.010927	0.807054	-0.44666	0.00044	-3.3597	0.00078	0/-
CASP4LP	THAP9	0.318458	2.7e-13	-0.16009	0.22997	-3.35945	0.000781	#ERROR!
DIMT1	THAP9	0.473571	0	0.764008	3.03e-12	3.3574	0.000787	#ERROR!
SH2D3C	THAP9	0.394357	0	-0.07395	0.58116	-3.35689	0.000788	#ERROR!
EGFR	THAP9	0.304808	2.97e-12	0.667282	1.06e-08	3.35675	0.000789	#ERROR!
MYNN	THAP9	0.759744	0	0.902701	0	3.35672	0.000789	#ERROR!
OR4D10	THAP9	-0.27434	4.06e-10	0.206347	0.120171	3.35598	0.000791	-/0
RAB11FIP5	THAP9	0.217518	8.63e-07	0.611819	3.35e-07	3.3551	0.000793	#ERROR!
DDB1	THAP9	0.461382	0	0.757087	6.14e-12	3.35178	0.000803	#ERROR!
MRPS35	THAP9	0.498927	0	0.777156	7.36e-13	3.35167	0.000803	#ERROR!
TBC1D10C	THAP9	0.216455	9.79e-07	-0.26384	0.045367	-3.35096	0.000805	#ERROR!
RGS9	THAP9	0.25807	4.43e-09	-0.22232	0.093468	-3.35077	0.000806	#ERROR!
ACBD3	THAP9	0.448216	0	0.749754	1.27e-11	3.34931	0.00081	#ERROR!
RAET1G	THAP9	-0.02616	0.55873	0.43305	0.000685	3.3485	0.000813	0/+
SDHC	THAP9	0.544496	0	0.800603	4.6e-14	3.34821	0.000813	#ERROR!
PAFAH1B2	THAP9	0.46086	0	0.756533	6.49e-12	3.34745	0.000816	#ERROR!
SOS2	THAP9	0.638488	0	0.846912	0	3.34648	0.000818	#ERROR!
CNR2	THAP9	0.317531	3.19e-13	-0.15924	0.232476	-3.34646	0.000819	#ERROR!
PLIN5	THAP9	0.161806	0.000272	0.573501	2.53e-06	3.34627	0.000819	#ERROR!
CYTB	THAP9	-0.09754	0.028871	0.372739	0.003958	3.34608	0.00082	-/+
RN7SL138P	THAP9	0.074525	0.095331	-0.39251	0.002307	-3.34592	0.00082	0/-
SEPTIN11	THAP9	0.156983	0.000415	0.570068	3e-06	3.34524	0.000822	#ERROR!
ANAPC10	THAP9	0.612922	0	0.834461	4.44e-16	3.3434	0.000828	#ERROR!
THSD4	THAP9	0.233889	1.15e-07	0.621447	1.93e-07	3.34338	0.000828	#ERROR!
HIPK2	THAP9	0.375896	0	0.708503	4.91e-10	3.34228	0.000831	#ERROR!
ARL8A	THAP9	0.272461	5.39e-10	0.64581	4.4e-08	3.33994	0.000838	#ERROR!
DCAF10	THAP9	0.664162	0	0.858786	0	3.33941	0.00084	#ERROR!
EXOSC3	THAP9	0.471331	0	0.761694	3.84e-12	3.33926	0.00084	#ERROR!
DVL2	THAP9	0.386276	0	0.714257	3.07e-10	3.33891	0.000841	#ERROR!
NBN	THAP9	0.46376	0	0.757567	5.85e-12	3.3388	0.000841	#ERROR!
ACVR2B-AS1	THAP9	0.394589	0	0.719001	2.06e-10	3.33853	0.000842	#ERROR!
HIGD1B	THAP9	0.300392	6.29e-12	-0.1765	0.185055	-3.33831	0.000843	#ERROR!
CCDC78	THAP9	0.113333	0.011049	-0.35791	0.005807	-3.33827	0.000843	#ERROR!
GNG2	THAP9	0.232916	1.3e-07	-0.24589	0.062812	-3.33818	0.000843	#ERROR!
APP	THAP9	0.628433	0	0.841731	0	3.33792	0.000844	#ERROR!
ORM2	THAP9	0.062094	0.164799	-0.40205	0.001758	-3.33791	0.000844	0/-
ARHGEF28	THAP9	0.439251	0	0.744074	2.18e-11	3.3378	0.000844	#ERROR!
ARHGAP18	THAP9	0.200555	5.94e-06	0.598929	6.81e-07	3.33727	0.000846	#ERROR!
ANO9	THAP9	0.148091	0.000874	-0.32636	0.012412	-3.33567	0.000851	#ERROR!
RNASE4	THAP9	-0.01176	0.792737	0.443067	0.000496	3.33475	0.000854	0/+
MFSD8	THAP9	0.639807	0	0.846974	0	3.33272	0.00086	#ERROR!
COPS2	THAP9	0.577227	0	0.816353	5.77e-15	3.33265	0.00086	#ERROR!
MPRIP	THAP9	0.356824	0	0.696505	1.27e-09	3.33094	0.000866	#ERROR!
SCAF1	THAP9	0.329431	3.6e-14	0.68014	4.3e-09	3.33056	0.000867	#ERROR!
SNX14	THAP9	0.526725	0	0.790495	1.59e-13	3.33031	0.000868	#ERROR!
CHMP3	THAP9	0.536411	0	0.795435	8.73e-14	3.32899	0.000872	#ERROR!
LEF1	THAP9	0.176079	7.3e-05	-0.29932	0.02246	-3.32725	0.000877	#ERROR!
CNIH4	THAP9	0.199817	6.44e-06	0.597441	7.38e-07	3.32667	0.000879	#ERROR!
NAALADL2	THAP9	0.256088	5.86e-09	0.634094	9.11e-08	3.32462	0.000885	#ERROR!
CHMP5	THAP9	0.368331	0	0.702792	7.76e-10	3.32454	0.000886	#ERROR!
EPCAM	THAP9	0.443668	0	0.745601	1.89e-11	3.32374	0.000888	#ERROR!
SLC35A5	THAP9	0.602023	0	0.828104	1.11e-15	3.32081	0.000898	#ERROR!
BABAM2	THAP9	0.238914	6.02e-08	0.622647	1.8e-07	3.32037	0.000899	#ERROR!
H4C4	THAP9	0.493146	0	0.05456	0.684176	-3.3197	0.000901	#ERROR!
SPOPL	THAP9	0.477306	0	0.763689	3.13e-12	3.31916	0.000903	#ERROR!
GALNT11	THAP9	0.563666	0	0.808847	1.6e-14	3.31901	0.000903	#ERROR!
CUL2	THAP9	0.521351	0	0.787018	2.39e-13	3.31806	0.000906	#ERROR!
LINC02346	THAP9	0.052888	0.236868	-0.40719	0.001513	-3.31684	0.00091	0/-
SERINC3	THAP9	0.560925	0	0.80734	1.93e-14	3.31672	0.000911	#ERROR!
FIG4	THAP9	0.437021	0	0.741444	2.8e-11	3.31656	0.000911	#ERROR!
H2AC16	THAP9	0.14216	0.001406	-0.32911	0.011651	-3.31531	0.000915	#ERROR!
MSI2	THAP9	0.54373	0	0.79845	6.02e-14	3.31484	0.000917	#ERROR!
DAW1	THAP9	-0.2426	3.71e-08	0.232853	0.078574	3.31381	0.00092	-/0
SEMA4G	THAP9	0.274324	4.07e-10	0.644738	4.71e-08	3.31362	0.000921	#ERROR!
CCL28	THAP9	0.378463	0	0.707887	5.16e-10	3.31338	0.000922	#ERROR!
CMPK1	THAP9	0.535987	0	0.794247	1.01e-13	3.31101	0.00093	#ERROR!
FOXM1	THAP9	0.124475	0.005225	-0.34433	0.008127	-3.30964	0.000934	#ERROR!
ABI2	THAP9	0.594523	0	0.823859	2e-15	3.30933	0.000935	#ERROR!
EAPP	THAP9	0.573632	0	0.8134	8.66e-15	3.30931	0.000935	#ERROR!
INTS5	THAP9	0.367038	0	0.70068	9.17e-10	3.30633	0.000945	#ERROR!
HSF5	THAP9	0.100193	0.024773	-0.36535	0.004802	-3.30587	0.000947	#ERROR!
GYPC	THAP9	0.075687	0.090264	-0.38643	0.002733	-3.30492	0.00095	0/-
ABI3BP	THAP9	0.197307	8.45e-06	0.5937	9.01e-07	3.30491	0.00095	#ERROR!
TCN2	THAP9	-0.09623	0.031113	0.368555	0.004418	3.30384	0.000954	-/+
GALNT3	THAP9	0.152746	0.000595	0.562995	4.22e-06	3.30371	0.000954	#ERROR!
CLDN7	THAP9	-0.06554	0.142525	0.394918	0.002156	3.30367	0.000954	0/+
NOTCH1	THAP9	0.458216	0	0.011936	0.929143	-3.30273	0.000957	#ERROR!
SYF2	THAP9	0.332887	1.87e-14	0.679997	4.35e-09	3.30221	0.000959	#ERROR!
SMG1P7	THAP9	0.338221	6.66e-15	-0.13013	0.330251	-3.30164	0.000961	#ERROR!
NEIL3	THAP9	0.035965	0.421358	-0.4193	0.001052	-3.30078	0.000964	0/-
ECE1-AS1	THAP9	0.173483	9.35e-05	-0.29821	0.022988	-3.30061	0.000965	#ERROR!
SUSD6	THAP9	0.310906	1.03e-12	0.666451	1.13e-08	3.30047	0.000965	#ERROR!
CXCL5	THAP9	-0.3511	4.44e-16	0.11557	0.387644	3.30046	0.000965	-/0
CCT4	THAP9	0.276492	2.92e-10	0.644949	4.64e-08	3.30005	0.000967	#ERROR!
KRT2	THAP9	0.227059	2.72e-07	-0.24641	0.062234	-3.29973	0.000968	#ERROR!
FJX1	THAP9	0.235471	9.4e-08	-0.23795	0.072067	-3.29907	0.00097	#ERROR!
MYL9	THAP9	0.025195	0.573309	0.468192	0.00021	3.29889	0.000971	0/+
PSMC6	THAP9	0.536301	0	0.793614	1.09e-13	3.29628	0.00098	#ERROR!
KIAA1191	THAP9	0.639068	0	0.845054	0	3.29508	0.000984	#ERROR!
PAH	THAP9	0.287644	5.1e-11	0.651538	3.04e-08	3.29493	0.000984	#ERROR!
CLIP4	THAP9	0.366565	0	0.699489	1.01e-09	3.2941	0.000987	#ERROR!
LINC01874	THAP9	0.166976	0.000171	-0.30326	0.020663	-3.29281	0.000992	#ERROR!
LINC00504	THAP9	0.087739	0.049447	0.515055	3.52e-05	3.29252	0.000993	#ERROR!
PRXL2A	THAP9	0.597099	0	0.824351	1.78e-15	3.29251	0.000993	#ERROR!
SNAP25	THAP9	-0.13025	0.003462	0.336831	0.009726	3.29174	0.000996	-/+
RNLS	THAP9	0.519804	0	0.784662	3.14e-13	3.29044	0.001	#ERROR!
KIAA1217	THAP9	0.108703	0.014822	0.529962	1.88e-05	3.28799	0.001009	#ERROR!
RAB21	THAP9	0.488835	0	0.767996	1.99e-12	3.28756	0.001011	#ERROR!
ASMTL	THAP9	0.295047	1.53e-11	0.6555	2.35e-08	3.28689	0.001013	#ERROR!
SLC30A9	THAP9	0.598425	0	0.824733	1.78e-15	3.28656	0.001014	#ERROR!
MYO5B	THAP9	0.349552	6.66e-16	0.688477	2.33e-09	3.28227	0.00103	#ERROR!
CIAO2A	THAP9	0.432796	0	0.736803	4.3e-11	3.28225	0.00103	#ERROR!
RNF185	THAP9	0.508732	0	0.778331	6.46e-13	3.28217	0.00103	#ERROR!
TMEM35A	THAP9	0.092543	0.038197	0.517401	3.2e-05	3.28127	0.001033	#ERROR!
CDC6	THAP9	0.097686	0.028636	-0.36441	0.00492	-3.28114	0.001034	#ERROR!
EVA1A	THAP9	-0.22944	2.02e-07	0.241394	0.067929	3.28046	0.001036	-/0
CTNNA2	THAP9	0.358167	0	-0.10468	0.434214	-3.28038	0.001037	#ERROR!
KPNA6	THAP9	0.483491	0	0.764612	2.84e-12	3.27936	0.00104	#ERROR!
ARHGAP25	THAP9	0.098681	0.027045	-0.3633	0.005062	-3.2793	0.001041	#ERROR!
PPBP	THAP9	-0.21071	1.91e-06	0.259514	0.049157	3.27803	0.001045	-/+
SLC1A4	THAP9	0.119225	0.007492	-0.34493	0.00801	-3.27784	0.001046	#ERROR!
MTCO1P12	THAP9	0.03021	0.499465	0.469546	0.0002	3.27644	0.001051	0/+
RNF141	THAP9	0.491541	0	0.768757	1.84e-12	3.27592	0.001053	#ERROR!
METTL15	THAP9	0.661239	0	0.854924	0	3.27568	0.001054	#ERROR!
PEX2	THAP9	0.732831	0	0.888274	0	3.27371	0.001061	#ERROR!
NAPG	THAP9	0.469123	0	0.756337	6.62e-12	3.27225	0.001067	#ERROR!
FAM83H	THAP9	0.338454	6.44e-15	0.681002	4.04e-09	3.27211	0.001067	#ERROR!
CANT1	THAP9	0.235153	9.8e-08	0.615796	2.68e-07	3.27165	0.001069	#ERROR!
CDC20	THAP9	0.119633	0.007288	-0.34348	0.008296	-3.26942	0.001078	#ERROR!
GRP	THAP9	-0.2901	3.44e-11	0.177631	0.18221	3.26919	0.001079	-/0
RLIM	THAP9	0.533691	0	0.790759	1.54e-13	3.26888	0.00108	#ERROR!
NXT2	THAP9	0.482447	0	0.763379	3.23e-12	3.26841	0.001082	#ERROR!
GPR143	THAP9	0.208313	2.51e-06	0.597576	7.33e-07	3.2675	0.001085	#ERROR!
MRPS23	THAP9	0.263595	2e-09	0.633906	9.21e-08	3.26744	0.001085	#ERROR!
BECN1	THAP9	0.410491	0	0.723075	1.45e-10	3.2668	0.001088	#ERROR!
LRP4	THAP9	0.170489	0.000124	0.571613	2.78e-06	3.26603	0.001091	#ERROR!
SLIT2	THAP9	-0.0146	0.744251	0.43254	0.000697	3.26513	0.001094	0/+
CASP6	THAP9	0.248101	1.77e-08	0.62365	1.7e-07	3.26482	0.001095	#ERROR!
HOXB13	THAP9	0.031033	0.48784	-0.41901	0.001062	-3.26455	0.001096	0/-
PDHX	THAP9	0.567412	0	0.807955	1.78e-14	3.26376	0.001099	#ERROR!
ADCY8	THAP9	-0.26279	2.25e-09	0.205242	0.122212	3.26303	0.001102	-/0
SRC	THAP9	0.170928	0.000119	0.5716	2.78e-06	3.26281	0.001103	#ERROR!
SPATS2L	THAP9	0.043893	0.326364	0.478536	0.000145	3.26204	0.001106	0/+
RB1CC1	THAP9	0.580107	0	0.814323	7.55e-15	3.26165	0.001108	#ERROR!
BEX4	THAP9	0.552854	0	0.800295	4.77e-14	3.2606	0.001112	#ERROR!
SNX1	THAP9	0.262138	2.47e-09	0.632367	1.01e-07	3.26058	0.001112	#ERROR!
NCBP2	THAP9	0.582867	0	0.815615	6.22e-15	3.25944	0.001116	#ERROR!
MEX3A	THAP9	-0.00983	0.826057	0.435311	0.000638	3.2559	0.00113	0/+
BBS2	THAP9	0.437811	0	0.737849	3.91e-11	3.25562	0.001131	#ERROR!
FGD1	THAP9	0.4378	0	0.737676	3.97e-11	3.25312	0.001141	#ERROR!
EIF3A	THAP9	0.431152	0	0.733881	5.61e-11	3.25257	0.001144	#ERROR!
DKC1	THAP9	0.520554	0	0.782884	3.86e-13	3.2519	0.001146	#ERROR!
ERC2	THAP9	0.221173	5.58e-07	0.60469	4.98e-07	3.25149	0.001148	#ERROR!
ND1	THAP9	-0.12934	0.003698	0.33241	0.010791	3.25138	0.001148	-/+
CTNNA1	THAP9	0.329732	3.38e-14	0.673834	6.75e-09	3.24867	0.001159	#ERROR!
SMIM13	THAP9	0.464094	0	0.752065	1.01e-11	3.24846	0.00116	#ERROR!
OR4D6	THAP9	-0.1946	1.13e-05	0.270611	0.039922	3.24478	0.001175	-/+
ELF3	THAP9	-0.31087	1.04e-12	0.15187	0.2551	3.24429	0.001177	-/0
PIK3C2B	THAP9	0.588598	0	0.198545	0.135156	-3.24249	0.001185	#ERROR!
GRAPL	THAP9	0.246041	2.34e-08	-0.21926	0.098188	-3.24095	0.001191	#ERROR!
MIPOL1	THAP9	0.585522	0	0.816052	6e-15	3.24084	0.001192	#ERROR!
SFRP2	THAP9	-0.31729	3.34e-13	0.144395	0.279509	3.24068	0.001192	-/0
PSMD10	THAP9	0.585102	0	0.815812	6.22e-15	3.24028	0.001194	#ERROR!
RADX	THAP9	0.460858	0	0.749735	1.27e-11	3.24007	0.001195	#ERROR!
TMEM183A	THAP9	0.528389	0	0.786342	2.59e-13	3.23951	0.001197	#ERROR!
NRP2	THAP9	-0.04805	0.282551	0.401593	0.001781	3.23795	0.001204	0/+
PLCD4	THAP9	0.620922	0	0.247612	0.06093	-3.23795	0.001204	#ERROR!
LIF	THAP9	-0.10734	0.016131	0.350375	0.00701	3.23787	0.001204	-/+
RIT1	THAP9	0.47099	0	0.755118	7.48e-12	3.23643	0.00121	#ERROR!
FAM166B	THAP9	0.350834	4.44e-16	-0.10661	0.425739	-3.23639	0.001211	#ERROR!
ANXA2R	THAP9	0.012719	0.776193	-0.43056	0.000742	-3.23569	0.001213	0/-
NUDCD2	THAP9	0.599853	0	0.823048	2.22e-15	3.23548	0.001214	#ERROR!
MEAK7	THAP9	0.488252	0	0.76447	2.88e-12	3.23441	0.001219	#ERROR!
PAQR9-AS1	THAP9	0.086494	0.052777	-0.36813	0.004467	-3.23336	0.001223	0/-
MPZL1	THAP9	0.24567	2.46e-08	0.619232	2.2e-07	3.23331	0.001224	#ERROR!
RRM1	THAP9	0.255261	6.58e-09	0.625477	1.53e-07	3.23304	0.001225	#ERROR!
POT1-AS1	THAP9	0.405551	0	0.717826	2.27e-10	3.23271	0.001226	#ERROR!
RNF13	THAP9	0.655677	0	0.850527	0	3.23265	0.001227	#ERROR!
PIAS3	THAP9	0.250876	1.21e-08	0.622493	1.82e-07	3.23166	0.001231	#ERROR!
TCP1	THAP9	0.46013	0	0.748708	1.4e-11	3.23039	0.001236	#ERROR!
C6orf47	THAP9	0.47704	0	0.75806	5.57e-12	3.23011	0.001237	#ERROR!
GTF3C3	THAP9	0.571038	0	0.808106	1.73e-14	3.23006	0.001238	#ERROR!
PRKCD	THAP9	0.312495	7.82e-13	0.661591	1.57e-08	3.22901	0.001242	#ERROR!
CD160	THAP9	0.365711	0	-0.08855	0.508613	-3.22844	0.001245	#ERROR!
HMGA2	THAP9	-0.04088	0.36069	0.406431	0.001547	3.22834	0.001245	0/+
TJP2	THAP9	0.296117	1.28e-11	0.651224	3.11e-08	3.22788	0.001247	#ERROR!
INHBB	THAP9	0.000457	0.991855	0.440046	0.000547	3.2256	0.001257	0/+
DNAJB11	THAP9	0.584544	0	0.195152	0.142094	-3.22437	0.001263	#ERROR!
SYT15	THAP9	0.324552	8.88e-14	-0.13403	0.315823	-3.22382	0.001265	#ERROR!
KIF20A	THAP9	0.102949	0.021056	-0.35233	0.006679	-3.22277	0.00127	#ERROR!
MIR150	THAP9	-0.04308	0.335437	-0.47345	0.000174	-3.2227	0.00127	0/-
MALRD1	THAP9	0.225256	3.4e-07	0.604637	5e-07	3.22155	0.001275	#ERROR!
RAB7A	THAP9	0.372581	0	0.697428	1.18e-09	3.21895	0.001287	#ERROR!
ICAM2	THAP9	0.17062	0.000122	-0.28991	0.027283	-3.21835	0.001289	#ERROR!
GSKIP	THAP9	0.339366	5.33e-15	0.67731	5.27e-09	3.21822	0.00129	#ERROR!
LINC01608	THAP9	0.264296	1.81e-09	-0.1974	0.137462	-3.21821	0.00129	#ERROR!
RAB5C	THAP9	0.387391	0	0.706145	5.94e-10	3.21804	0.001291	#ERROR!
FAM83A	THAP9	-0.20505	3.62e-06	0.256822	0.051642	3.21788	0.001291	-/0
RANBP9	THAP9	0.421208	0	0.725751	1.15e-10	3.21672	0.001297	#ERROR!
IL1RN	THAP9	-0.35426	2.22e-16	0.099888	0.455649	3.21667	0.001297	-/0
CAPN11	THAP9	0.151872	0.00064	-0.30715	0.019013	-3.21619	0.001299	#ERROR!
CAPRIN1	THAP9	0.404471	0	0.715916	2.67e-10	3.21468	0.001306	#ERROR!
TGM1	THAP9	-0.10638	0.017114	0.348036	0.007426	3.213	0.001314	-/+
PARG	THAP9	0.467166	0	0.751477	1.07e-11	3.2124	0.001316	#ERROR!
SUPT16H	THAP9	0.489156	0	0.763443	3.21e-12	3.20943	0.00133	#ERROR!
LINC00426	THAP9	0.139266	0.001761	-0.31757	0.015134	-3.20707	0.001341	#ERROR!
RAD50	THAP9	0.482655	0	0.759686	4.72e-12	3.20647	0.001344	#ERROR!
RNF14	THAP9	0.600891	0	0.822167	2.66e-15	3.20575	0.001347	#ERROR!
ASAH1	THAP9	0.494414	0	0.766088	2.43e-12	3.20559	0.001348	#ERROR!
EIF5A2	THAP9	0.487477	0	0.762244	3.63e-12	3.2049	0.001351	#ERROR!
PAAF1	THAP9	0.466559	0	0.750646	1.16e-11	3.20468	0.001352	#ERROR!
ENG	THAP9	0.344029	2.22e-15	-0.10967	0.412512	-3.20463	0.001352	#ERROR!
RHPN2	THAP9	0.422973	0	0.725928	1.14e-10	3.20458	0.001353	#ERROR!
RNF146	THAP9	0.515048	0	0.777224	7.31e-13	3.2045	0.001353	#ERROR!
FEM1C	THAP9	0.323311	1.12e-13	0.666308	1.14e-08	3.20442	0.001353	#ERROR!
ATP2C1	THAP9	0.530402	0	0.785376	2.9e-13	3.20313	0.001359	#ERROR!
SORT1	THAP9	0.571145	0	0.806694	2.09e-14	3.20125	0.001368	#ERROR!
ARL6IP1	THAP9	0.520466	0	0.77987	5.43e-13	3.19981	0.001375	#ERROR!
PPFIBP2	THAP9	0.372653	0	0.696013	1.32e-09	3.19958	0.001376	#ERROR!
CITED1	THAP9	-0.17575	7.53e-05	0.282524	0.031651	3.19953	0.001377	-/+
HPS1	THAP9	0.176353	7.11e-05	0.568915	3.17e-06	3.19736	0.001387	#ERROR!
SNTB1	THAP9	0.482195	0	0.758829	5.15e-12	3.19672	0.00139	#ERROR!
SNX13	THAP9	0.641302	0	0.841977	0	3.19631	0.001392	#ERROR!
MRPL42	THAP9	0.665573	0	0.853847	0	3.1955	0.001396	#ERROR!
RTN4	THAP9	0.142668	0.001351	0.544789	9.81e-06	3.19457	0.0014	#ERROR!
SPRR1A	THAP9	-0.24846	1.69e-08	0.210278	0.113117	3.19413	0.001403	-/0
PCDHB3	THAP9	0.217848	8.3e-07	0.597086	7.52e-07	3.19402	0.001403	#ERROR!
SIPA1L1	THAP9	0.285156	7.58e-11	0.64135	5.82e-08	3.19379	0.001404	#ERROR!
GLRX3	THAP9	0.125948	0.004711	0.532484	1.69e-05	3.19247	0.001411	#ERROR!
CSTF3	THAP9	0.561816	0	0.801372	4.17e-14	3.19224	0.001412	#ERROR!
SLC25A40	THAP9	0.556453	0	0.798523	5.95e-14	3.19151	0.001415	#ERROR!
RNA5SP248	THAP9	-0.09527	0.032835	0.355102	0.006233	3.1914	0.001416	-/+
CERS2	THAP9	0.535563	0	0.787468	2.27e-13	3.19132	0.001416	#ERROR!
TM2D1	THAP9	0.547929	0	0.793983	1.04e-13	3.19052	0.00142	#ERROR!
AP5B1	THAP9	0.166831	0.000173	0.561448	4.54e-06	3.18943	0.001426	#ERROR!
SETD7	THAP9	0.159632	0.00033	0.556355	5.77e-06	3.18936	0.001426	#ERROR!
PRR5-ARHGAP8	THAP9	0.136648	0.002152	0.539893	1.22e-05	3.18913	0.001427	#ERROR!
TANC1	THAP9	0.253032	8.98e-09	0.620063	2.09e-07	3.18887	0.001428	#ERROR!
PIK3CA	THAP9	0.329203	3.73e-14	0.668697	9.65e-09	3.1888	0.001429	#ERROR!
KLHL7	THAP9	0.548319	0	0.794094	1.03e-13	3.18876	0.001429	#ERROR!
HGS	THAP9	0.193325	1.29e-05	0.579827	1.84e-06	3.18856	0.00143	#ERROR!
SF3B2	THAP9	0.369212	0	0.69306	1.65e-09	3.18786	0.001433	#ERROR!
LOC102724163	THAP9	-0.03002	0.502232	-0.45913	0.000289	-3.18698	0.001438	0/-
SEPTIN9-DT	THAP9	-0.16371	0.00023	0.292132	0.02607	3.18636	0.001441	-/+
APMAP	THAP9	0.548382	0	0.793958	1.05e-13	3.18564	0.001444	#ERROR!
IL1RL1	THAP9	-0.22721	2.67e-07	0.230289	0.082016	3.18395	0.001453	-/0
PIK3AP1	THAP9	0.197619	8.17e-06	-0.25938	0.049277	-3.18368	0.001454	#ERROR!
GRM1	THAP9	0.355618	2.22e-16	0.684502	3.13e-09	3.18351	0.001455	#ERROR!
DNMBP-AS1	THAP9	0.152187	0.000623	0.550468	7.58e-06	3.1835	0.001455	#ERROR!
HAGHL	THAP9	-0.08707	0.051204	-0.50272	5.78e-05	-3.18326	0.001456	0/-
HMGN4	THAP9	0.379067	0	0.698505	1.09e-09	3.18167	0.001464	#ERROR!
C9orf64	THAP9	0.620255	0	0.830811	6.66e-16	3.18114	0.001467	#ERROR!
GCM1	THAP9	0.030371	0.497184	-0.40942	0.001416	-3.18087	0.001468	0/-
HAUS4	THAP9	0.194604	1.13e-05	0.57995	1.83e-06	3.18074	0.001469	#ERROR!
SIRT4	THAP9	0.555669	0	0.159954	0.230373	-3.18031	0.001471	#ERROR!
CPNE5	THAP9	0.081538	0.067944	-0.3655	0.004783	-3.17846	0.001481	0/-
SVIL	THAP9	0.212145	1.62e-06	0.591701	1e-06	3.17796	0.001483	#ERROR!
SSTR2	THAP9	0.167171	0.000168	-0.28771	0.028529	-3.17765	0.001485	#ERROR!
GABRD	THAP9	0.360029	0	-0.08739	0.514186	-3.17573	0.001495	#ERROR!
LPAR3	THAP9	-0.12321	0.005707	0.32807	0.011933	3.17549	0.001496	-/+
LZTS3	THAP9	0.31126	9.71e-13	0.656341	2.22e-08	3.17492	0.001499	#ERROR!
EIF2S1	THAP9	0.546615	0	0.792359	1.27e-13	3.17341	0.001507	#ERROR!
ALG10	THAP9	0.510984	0	0.773175	1.14e-12	3.17283	0.00151	#ERROR!
OCIAD2	THAP9	-0.10175	0.022613	0.346745	0.007664	3.17097	0.001519	-/+
SCARA3	THAP9	-0.06903	0.122432	0.375144	0.003713	3.1689	0.00153	0/+
TARS1	THAP9	0.418822	0	0.721034	1.73e-10	3.16886	0.00153	#ERROR!
FANCE	THAP9	0.168193	0.000153	0.560261	4.8e-06	3.16801	0.001535	#ERROR!
LGALSL	THAP9	0.447614	0	0.737514	4.03e-11	3.16723	0.001539	#ERROR!
H4C5	THAP9	0.453339	0	0.025605	0.848693	-3.16717	0.001539	#ERROR!
NFYB	THAP9	0.578123	0	0.80857	1.64e-14	3.16691	0.001541	#ERROR!
KLRG1	THAP9	0.324876	8.39e-14	-0.1254	0.348277	-3.16627	0.001544	#ERROR!
GOSR1	THAP9	0.692845	0	0.865923	0	3.1662	0.001544	#ERROR!
DAPK2	THAP9	-0.03934	0.37908	0.400092	0.00186	3.16605	0.001545	0/+
CALD1	THAP9	0.150143	0.000739	0.547219	8.79e-06	3.16602	0.001545	#ERROR!
NBR1	THAP9	0.605147	0	0.822426	2.44e-15	3.16548	0.001548	#ERROR!
KATNBL1	THAP9	0.526082	0	0.780915	4.83e-13	3.16523	0.00155	#ERROR!
H3C10	THAP9	0.491618	0	0.07508	0.575384	-3.16502	0.001551	#ERROR!
PCDH1	THAP9	0.110896	0.012914	0.518496	3.06e-05	3.16472	0.001552	#ERROR!
SEZ6L2	THAP9	-0.21558	1.08e-06	0.239182	0.070568	3.16471	0.001552	-/0
ARFIP1	THAP9	0.604936	0	0.822259	2.66e-15	3.16425	0.001555	#ERROR!
C1orf210	THAP9	0.487248	0	0.759598	4.76e-12	3.16398	0.001556	#ERROR!
C10orf55	THAP9	-0.30401	3.4e-12	0.147515	0.26914	3.16204	0.001567	-/0
CDK16	THAP9	0.23356	1.2e-07	0.604577	5.01e-07	3.16098	0.001572	#ERROR!
PLCD3	THAP9	-0.16814	0.000154	0.284462	0.030452	3.16035	0.001576	-/+
SMG5	THAP9	0.198122	7.74e-06	0.580389	1.79e-06	3.16025	0.001576	#ERROR!
PTK2	THAP9	0.584632	0	0.811585	1.11e-14	3.15965	0.00158	#ERROR!
CDK1	THAP9	0.283946	9.18e-11	-0.16848	0.206155	-3.15885	0.001584	#ERROR!
PTTG1IP	THAP9	0.369312	0	0.690815	1.96e-09	3.15761	0.001591	#ERROR!
SIRT3	THAP9	0.445641	0	0.735727	4.74e-11	3.15737	0.001592	#ERROR!
KIF26B	THAP9	0.168286	0.000152	0.559256	5.04e-06	3.15734	0.001592	#ERROR!
CPS1	THAP9	0.365802	0	0.68859	2.31e-09	3.15636	0.001598	#ERROR!
ENOPH1	THAP9	0.418848	0	0.720161	1.87e-10	3.15624	0.001598	#ERROR!
BRINP1	THAP9	-0.19962	6.58e-06	0.253662	0.05469	3.15605	0.001599	-/0
ACER1	THAP9	0.17323	9.57e-05	-0.27897	0.033954	-3.15537	0.001603	#ERROR!
PCDHA10	THAP9	0.325609	7.33e-14	0.663724	1.36e-08	3.15519	0.001604	#ERROR!
OSBP2	THAP9	0.380606	0	0.697428	1.18e-09	3.15502	0.001605	#ERROR!
IGSF8	THAP9	0.172045	0.000107	0.561677	4.49e-06	3.15502	0.001605	#ERROR!
DERL1	THAP9	0.35786	0	0.683616	3.34e-09	3.15457	0.001607	#ERROR!
MARK4	THAP9	0.4316	0	0.727452	9.94e-11	3.15451	0.001608	#ERROR!
ITPKC	THAP9	-0.05003	0.263226	0.389587	0.002504	3.15417	0.00161	0/+
SMYD5	THAP9	0.347445	1.11e-15	0.677187	5.32e-09	3.15405	0.00161	#ERROR!
CEP20	THAP9	0.711267	0	0.874308	0	3.15385	0.001611	#ERROR!
SIPA1L2	THAP9	0.218165	8e-07	0.593426	9.14e-07	3.15299	0.001616	#ERROR!
EIF5AP2	THAP9	0.042909	0.337335	-0.39543	0.002124	-3.15265	0.001618	0/-
PRDM4	THAP9	0.512077	0	0.772579	1.22e-12	3.1526	0.001618	#ERROR!
TLE4	THAP9	0.23732	7.41e-08	0.606189	4.59e-07	3.15116	0.001626	#ERROR!
RTL6	THAP9	0.484099	0	0.757044	6.17e-12	3.15108	0.001627	#ERROR!
ANXA11	THAP9	0.01768	0.692713	0.44509	0.000464	3.15073	0.001629	0/+
MIR3168	THAP9	0.128219	0.004008	-0.32016	0.014284	-3.14986	0.001634	#ERROR!
NEU1	THAP9	0.217866	8.29e-07	0.592909	9.39e-07	3.14968	0.001635	#ERROR!
DOCK8	THAP9	0.244904	2.72e-08	-0.20752	0.118029	-3.14857	0.001641	#ERROR!
HACD2	THAP9	0.442873	0	0.733481	5.81e-11	3.1476	0.001646	#ERROR!
MEX3C	THAP9	0.2401	5.15e-08	0.607644	4.23e-07	3.14675	0.001651	#ERROR!
TDRKH	THAP9	0.234744	1.03e-07	0.604036	5.16e-07	3.14658	0.001652	#ERROR!
JADE3	THAP9	0.360951	0	0.684848	3.05e-09	3.14614	0.001654	#ERROR!
PI4K2A	THAP9	-0.2132	1.43e-06	0.238957	0.070841	3.14598	0.001655	-/0
PPIAP88	THAP9	-0.00348	0.93805	-0.43301	0.000686	-3.14554	0.001658	0/-
NCOA4	THAP9	0.424901	0	0.722868	1.48e-10	3.14451	0.001664	#ERROR!
LOC107986163	THAP9	-0.23516	9.79e-08	0.216675	0.102322	3.14341	0.00167	-/0
NRBP1	THAP9	0.21934	6.95e-07	0.593171	9.26e-07	3.14185	0.001679	#ERROR!
RAB30	THAP9	0.607454	0	0.24054	0.068938	-3.1415	0.001681	#ERROR!
CCT8	THAP9	0.303421	3.77e-12	0.648558	3.69e-08	3.14145	0.001681	#ERROR!
B3GALNT1	THAP9	0.512044	0	0.771853	1.32e-12	3.14061	0.001686	#ERROR!
RAB22A	THAP9	0.568768	0	0.80232	3.69e-14	3.14054	0.001686	#ERROR!
RNF130	THAP9	0.253033	8.98e-09	0.615572	2.71e-07	3.13919	0.001694	#ERROR!
RASAL2-AS1	THAP9	0.242717	3.65e-08	0.60869	3.99e-07	3.13911	0.001695	#ERROR!
CIBAR1	THAP9	0.379425	0	0.695501	1.37e-09	3.13888	0.001696	#ERROR!
ELK1	THAP9	0.270413	7.33e-10	0.626942	1.4e-07	3.13824	0.0017	#ERROR!
TBC1D22B	THAP9	0.404949	0	0.710544	4.16e-10	3.13601	0.001713	#ERROR!
KIF15	THAP9	0.227458	2.59e-07	-0.22335	0.091924	-3.13575	0.001714	#ERROR!
TCTN2	THAP9	0.47805	0	0.752688	9.51e-12	3.13565	0.001715	#ERROR!
RPL35AP17	THAP9	0.130819	0.003321	-0.31572	0.015768	-3.13422	0.001723	#ERROR!
FAM210A	THAP9	0.651087	0	0.844205	0	3.13411	0.001724	#ERROR!
PDXP-DT	THAP9	0.009664	0.828988	-0.42085	0.001004	-3.13369	0.001726	0/-
ETS1	THAP9	0.367959	0	-0.07217	0.590339	-3.13346	0.001728	#ERROR!
LMO4	THAP9	0.295549	1.41e-11	0.642796	5.32e-08	3.13301	0.00173	#ERROR!
PTPN12	THAP9	0.372558	0	0.690876	1.95e-09	3.13269	0.001732	#ERROR!
RND2	THAP9	0.407747	0	0.711926	3.72e-10	3.13222	0.001735	#ERROR!
ABCA7	THAP9	0.302987	4.05e-12	-0.14427	0.279924	-3.13167	0.001738	#ERROR!
HPCAL1	THAP9	0.449042	0	0.025471	0.849476	-3.1312	0.001741	#ERROR!
KLHL9	THAP9	0.614738	0	0.825656	1.55e-15	3.12987	0.001749	#ERROR!
DCN	THAP9	-0.20825	2.53e-06	0.241602	0.067684	3.12976	0.001749	-/0
CNP	THAP9	0.233721	1.18e-07	0.601729	5.86e-07	3.1292	0.001753	#ERROR!
GPR63	THAP9	0.576356	0	0.805715	2.4e-14	3.12901	0.001754	#ERROR!
MRPL39	THAP9	0.442459	0	0.731904	6.7e-11	3.12784	0.001761	#ERROR!
LRRC8C	THAP9	0.384576	0	-0.052	0.698248	-3.12741	0.001764	#ERROR!
ABCB10	THAP9	0.58004	0	0.807549	1.87e-14	3.12708	0.001766	#ERROR!
ABCE1	THAP9	0.44706	0	0.734496	5.3e-11	3.12696	0.001766	#ERROR!
LINC00926	THAP9	0.110922	0.012892	-0.33272	0.010714	-3.126	0.001772	#ERROR!
DUSP3	THAP9	0.341821	3.33e-15	0.671465	7.96e-09	3.12595	0.001772	#ERROR!
ENTPD3	THAP9	0.235204	9.73e-08	0.602363	5.66e-07	3.12527	0.001776	#ERROR!
LINC01841	THAP9	0.003423	0.939019	-0.42488	0.000886	-3.12456	0.001781	0/-
SRP72P2	THAP9	0.366506	0	-0.07247	0.588782	-3.12405	0.001784	#ERROR!
PTPN6	THAP9	0.09459	0.034108	-0.34702	0.007612	-3.12372	0.001786	#ERROR!
ADAMTSL2	THAP9	0.380849	0	-0.05568	0.678049	-3.12276	0.001792	#ERROR!
BRI3	THAP9	-0.07899	0.077024	0.36063	0.00542	3.12262	0.001792	0/+
SEPTIN8	THAP9	0.225452	3.31e-07	0.595484	8.19e-07	3.12235	0.001794	#ERROR!
MARCHF6	THAP9	0.630636	0	0.833395	4.44e-16	3.122	0.001796	#ERROR!
DCTN6	THAP9	0.533783	0	0.782558	4.01e-13	3.12089	0.001803	#ERROR!
CDCA3	THAP9	0.231448	1.57e-07	-0.2171	0.10164	-3.1196	0.001811	#ERROR!
CRABP2	THAP9	-0.16319	0.000241	0.283653	0.030948	3.11951	0.001812	-/+
KCNIP2	THAP9	0.357679	0	-0.08184	0.54139	-3.11903	0.001814	#ERROR!
NCALD	THAP9	0.336511	9.33e-15	-0.10545	0.430794	-3.11737	0.001825	#ERROR!
GALC	THAP9	0.69963	0	0.867417	0	3.11722	0.001826	#ERROR!
TK2	THAP9	0.230396	1.79e-07	0.598323	7.04e-07	3.11686	0.001828	#ERROR!
PAN2	THAP9	0.666908	0	0.335733	0.009982	-3.11654	0.00183	#ERROR!
CLPX	THAP9	0.535612	0	0.783296	3.68e-13	3.11643	0.001831	#ERROR!
PARVB	THAP9	0.040923	0.360201	-0.39263	0.0023	-3.11635	0.001831	0/-
ENPP1	THAP9	0.146792	0.000972	0.539683	1.23e-05	3.11633	0.001831	#ERROR!
LOC101927855	THAP9	0.289646	3.7e-11	-0.15631	0.241321	-3.11584	0.001834	#ERROR!
OSTM1	THAP9	0.286739	5.89e-11	0.635586	8.31e-08	3.11549	0.001836	#ERROR!
PTGES3	THAP9	0.458106	0	0.740064	3.18e-11	3.11538	0.001837	#ERROR!
FOXP2	THAP9	0.517076	0	0.773102	1.15e-12	3.115	0.001839	#ERROR!
LINC01146	THAP9	-0.09319	0.036868	-0.49985	6.47e-05	-3.11494	0.00184	-/-
LINC01104	THAP9	0.086249	0.053456	-0.35318	0.00654	-3.11416	0.001845	0/-
FAM174A	THAP9	0.283968	9.15e-11	0.633629	9.37e-08	3.1137	0.001848	#ERROR!
ADAMTS12	THAP9	-0.00708	0.874249	0.420546	0.001013	3.11352	0.001849	0/+
ABL2	THAP9	0.225634	3.24e-07	0.594629	8.58e-07	3.11198	0.001858	#ERROR!
KIAA1143	THAP9	0.610472	0	0.82261	2.22e-15	3.11166	0.00186	#ERROR!
NR5A2	THAP9	0.36943	0	-0.06716	0.616448	-3.11069	0.001867	#ERROR!
SEC23A	THAP9	0.148468	0.000848	0.540236	1.2e-05	3.10996	0.001871	#ERROR!
CAMSAP1	THAP9	0.260712	3.04e-09	0.618011	2.36e-07	3.10991	0.001871	#ERROR!
SCAPER	THAP9	0.512749	0	0.770407	1.54e-12	3.10969	0.001873	#ERROR!
RNF6	THAP9	0.556117	0	0.79394	1.05e-13	3.10922	0.001876	#ERROR!
SEMA4B	THAP9	0.303922	3.46e-12	0.646118	4.31e-08	3.10896	0.001877	#ERROR!
AP2A1	THAP9	0.203527	4.29e-06	0.579057	1.92e-06	3.10803	0.001883	#ERROR!
GIMAP6	THAP9	0.463293	0	0.046912	0.726577	-3.10746	0.001887	#ERROR!
LINC00205	THAP9	0.611659	0	0.822999	2.22e-15	3.10694	0.00189	#ERROR!
DHRSX	THAP9	0.486573	0	0.75566	7.08e-12	3.10684	0.001891	#ERROR!
FBXL17	THAP9	0.651788	0	0.843405	0	3.10681	0.001891	#ERROR!
PCDHGB5	THAP9	0.346175	1.33e-15	0.672552	7.38e-09	3.10574	0.001898	#ERROR!
SNX25	THAP9	0.357289	0	0.679423	4.53e-09	3.10553	0.001899	#ERROR!
AKAP6	THAP9	0.50405	0	0.7653	2.64e-12	3.10482	0.001904	#ERROR!
MTRR	THAP9	0.579457	0	0.806079	2.26e-14	3.10428	0.001907	#ERROR!
CWF19L2	THAP9	0.477559	0	0.7504	1.19e-11	3.10406	0.001909	#ERROR!
OSMR	THAP9	-0.17864	5.7e-05	0.266831	0.042892	3.10386	0.00191	-/+
MRPS30	THAP9	0.503858	0	0.765104	2.7e-12	3.10334	0.001914	#ERROR!
TMEM100	THAP9	-0.18675	2.54e-05	0.258829	0.04978	3.10248	0.001919	-/+
ESD	THAP9	0.524029	0	0.776086	8.29e-13	3.10079	0.00193	#ERROR!
LOC101928489	THAP9	-0.01168	0.794088	0.415123	0.001194	3.10004	0.001935	0/+
RABGGTB	THAP9	0.173576	9.27e-05	0.557217	5.54e-06	3.09985	0.001936	#ERROR!
ITGA2	THAP9	-0.09988	0.025237	0.339127	0.00921	3.09902	0.001942	-/+
COP1	THAP9	0.465727	0	0.743336	2.34e-11	3.09888	0.001943	#ERROR!
KCNS3	THAP9	-0.07973	0.074305	0.356944	0.005951	3.09876	0.001943	0/+
SESTD1	THAP9	0.131972	0.003052	0.527009	2.14e-05	3.09856	0.001945	#ERROR!
RBM15-AS1	THAP9	0.272282	5.54e-10	-0.17209	0.196439	-3.0979	0.001949	#ERROR!
CRCT1	THAP9	-0.24076	4.72e-08	0.204621	0.12337	3.09778	0.00195	-/0
NSA2	THAP9	0.267991	1.05e-09	0.621662	1.91e-07	3.09694	0.001955	#ERROR!
NRBF2	THAP9	0.508843	0	0.767484	2.1e-12	3.09693	0.001955	#ERROR!
SDHAF4	THAP9	0.406738	0	0.708636	4.86e-10	3.09511	0.001967	#ERROR!
LINC00698	THAP9	-0.03809	0.394477	-0.45485	0.000334	-3.09476	0.00197	0/-
STAB1	THAP9	0.185756	2.81e-05	-0.25874	0.049865	-3.09476	0.00197	#ERROR!
PCDHA3	THAP9	0.196543	9.17e-06	0.572825	2.62e-06	3.09402	0.001975	#ERROR!
STXBP3	THAP9	0.681456	0	0.857635	0	3.09348	0.001978	#ERROR!
RNF41	THAP9	0.510208	0	0.768007	1.99e-12	3.09304	0.001981	#ERROR!
PCDH9	THAP9	0.035484	0.427601	0.452357	0.000364	3.09113	0.001994	0/+
CBFA2T3	THAP9	0.167772	0.000159	-0.27536	0.03643	-3.09025	0.002	#ERROR!
RESF1	THAP9	0.495209	0	0.090687	0.498398	-3.09004	0.002001	#ERROR!
MARCHF3	THAP9	0.387528	0	-0.04301	0.748534	-3.08951	0.002005	#ERROR!
PLA2G12A	THAP9	0.676622	0	0.855082	0	3.08935	0.002006	#ERROR!
SMURF1	THAP9	0.287013	5.64e-11	0.633362	9.52e-08	3.08799	0.002015	#ERROR!
LOC730101	THAP9	0.472984	0	0.062128	0.643149	-3.08797	0.002015	#ERROR!
CYP4B1	THAP9	-0.04101	0.359221	0.38903	0.002543	3.08788	0.002016	0/+
C1D	THAP9	0.393874	0	0.700381	9.38e-10	3.08778	0.002017	#ERROR!
IPO9	THAP9	0.52979	0	0.778485	6.35e-13	3.08771	0.002017	#ERROR!
CEP104	THAP9	0.459114	0	0.738803	3.58e-11	3.08763	0.002018	#ERROR!
RBM38-AS1	THAP9	0.128425	0.003949	-0.31133	0.017367	-3.08424	0.002041	#ERROR!
SMAD4	THAP9	0.717293	0	0.8748	0	3.08405	0.002042	#ERROR!
EIF2AK1	THAP9	0.497296	0	0.760213	4.47e-12	3.08327	0.002047	#ERROR!
PIGT	THAP9	0.44	0	0.727401	9.99e-11	3.08289	0.00205	#ERROR!
BRCC3	THAP9	0.584379	0	0.807567	1.87e-14	3.08257	0.002052	#ERROR!
RAB5A	THAP9	0.660691	0	0.846838	0	3.082	0.002056	#ERROR!
STX7	THAP9	0.5304	0	0.778485	6.35e-13	3.08191	0.002057	#ERROR!
TMEM105	THAP9	-0.08158	0.0678	0.352881	0.006588	3.07973	0.002072	0/+
PHACTR3	THAP9	-0.19272	1.37e-05	0.249916	0.058489	3.07963	0.002073	-/0
FBXO3	THAP9	0.704894	0	0.868617	0	3.07947	0.002074	#ERROR!
RPS2P10	THAP9	0.031415	0.482499	-0.39601	0.00209	-3.0786	0.00208	0/-
SERAC1	THAP9	0.481317	0	0.750873	1.14e-11	3.0781	0.002083	#ERROR!
H4C11	THAP9	0.264554	1.74e-09	-0.17735	0.182903	-3.07805	0.002084	#ERROR!
SULF2	THAP9	-0.09901	0.026534	0.337055	0.009675	3.07706	0.002091	-/+
HVCN1	THAP9	0.127568	0.004199	-0.31109	0.017457	-3.07649	0.002095	#ERROR!
PATJ	THAP9	0.428137	0	0.719884	1.91e-10	3.07492	0.002106	#ERROR!
SCARB1	THAP9	0.53331	0	0.144118	0.280442	-3.07383	0.002113	#ERROR!
MGAT4C	THAP9	0.294128	1.78e-11	0.636705	7.76e-08	3.07316	0.002118	#ERROR!
ITPR3	THAP9	0.106659	0.016821	0.505414	5.2e-05	3.07283	0.00212	#ERROR!
HMGB3P29	THAP9	0.207747	2.67e-06	-0.23424	0.076762	-3.07283	0.00212	#ERROR!
AK3	THAP9	0.618719	0	0.82504	1.78e-15	3.07276	0.002121	#ERROR!
BEAN1-AS1	THAP9	0.025347	0.570997	0.442063	0.000512	3.07253	0.002123	0/+
NONO	THAP9	0.477662	0	0.748308	1.46e-11	3.07053	0.002137	#ERROR!
CDK14	THAP9	0.250123	1.34e-08	0.606937	4.4e-07	3.06619	0.002168	#ERROR!
CEP76	THAP9	0.502924	0	0.762259	3.63e-12	3.06523	0.002175	#ERROR!
FANK1	THAP9	0.192126	1.46e-05	0.566744	3.52e-06	3.06384	0.002185	#ERROR!
PICALM	THAP9	0.372624	0	0.685585	2.89e-09	3.06343	0.002188	#ERROR!
ADGRB3	THAP9	0.159043	0.000347	0.54306	1.06e-05	3.06323	0.00219	#ERROR!
PLCG2	THAP9	0.210728	1.9e-06	-0.22995	0.082484	-3.06313	0.00219	#ERROR!
MADCAM1	THAP9	0.274595	3.91e-10	-0.16467	0.21675	-3.06272	0.002193	#ERROR!
SPG21	THAP9	0.453513	0	0.733881	5.61e-11	3.06249	0.002195	#ERROR!
PRKN	THAP9	0.633729	0	0.832234	4.44e-16	3.06087	0.002207	#ERROR!
ATF6	THAP9	0.447759	0	0.730374	7.68e-11	3.06019	0.002212	#ERROR!
LRRTM1	THAP9	0.377519	0	-0.05021	0.70819	-3.05868	0.002223	#ERROR!
GSK3B	THAP9	0.420713	0	0.714316	3.05e-10	3.05847	0.002225	#ERROR!
FSTL1	THAP9	0.155398	0.000475	0.539836	1.22e-05	3.05761	0.002231	#ERROR!
COMMD10	THAP9	0.533366	0	0.778651	6.23e-13	3.05651	0.002239	#ERROR!
LRRC2	THAP9	0.571136	0	0.799139	5.51e-14	3.05596	0.002243	#ERROR!
RALA	THAP9	0.232185	1.43e-07	0.593725	9e-07	3.05517	0.002249	#ERROR!
THBS4-AS1	THAP9	0.288519	4.43e-11	-0.14881	0.264918	-3.05497	0.002251	#ERROR!
GNL1	THAP9	0.293955	1.83e-11	0.63489	8.68e-08	3.05363	0.002261	#ERROR!
SARS1	THAP9	0.275121	3.61e-10	0.622493	1.82e-07	3.05358	0.002261	#ERROR!
PIP4P1	THAP9	0.323993	9.86e-14	0.654249	2.55e-08	3.05304	0.002265	#ERROR!
COLEC12	THAP9	-0.22047	6.07e-07	0.218838	0.098858	3.053	0.002266	-/0
SLC35F1	THAP9	0.305552	2.62e-12	0.642343	5.47e-08	3.05257	0.002269	#ERROR!
IVL	THAP9	-0.40924	0	0.011796	0.929971	3.05238	0.00227	-/0
GPR31	THAP9	-0.02416	0.5891	-0.43866	0.000572	-3.05172	0.002275	0/-
RAB11FIP1	THAP9	0.007325	0.869953	0.424911	0.000885	3.05136	0.002278	0/+
PDE11A	THAP9	0.352786	4.44e-16	0.672296	7.52e-09	3.05105	0.00228	#ERROR!
GATA5	THAP9	0.22999	1.89e-07	-0.20899	0.1154	-3.05098	0.002281	#ERROR!
NOD1	THAP9	-0.03765	0.39992	0.387288	0.002669	3.05088	0.002282	0/+
GSTO2	THAP9	0.35919	0	0.676264	5.68e-09	3.05066	0.002283	#ERROR!
ACTR10	THAP9	0.476275	0	0.746228	1.78e-11	3.0506	0.002284	#ERROR!
SLC7A1	THAP9	0.174007	8.9e-05	0.552418	6.93e-06	3.04941	0.002293	#ERROR!
MYO15A	THAP9	0.332605	1.98e-14	0.659375	1.82e-08	3.04869	0.002298	#ERROR!
MATN2	THAP9	0.566346	0	0.796142	7.99e-14	3.04806	0.002303	#ERROR!
NKX2-8	THAP9	-0.06414	0.151277	0.36412	0.004956	3.04804	0.002303	0/+
RAB28	THAP9	0.680322	0	0.855233	0	3.04634	0.002316	#ERROR!
EEF2	THAP9	0.29385	1.86e-11	0.634152	9.07e-08	3.04597	0.002319	#ERROR!
ANXA5	THAP9	0.223181	4.38e-07	0.586625	1.3e-06	3.04561	0.002322	#ERROR!
CTSO	THAP9	0.58596	0	0.806491	2.18e-14	3.04502	0.002327	#ERROR!
SPRR3	THAP9	-0.24463	2.82e-08	0.193255	0.146087	3.04499	0.002327	-/0
FEM1AP2	THAP9	0.095895	0.031701	0.494179	8.06e-05	3.0448	0.002328	#ERROR!
RLIMP3	THAP9	0.026848	0.548403	0.439988	0.000548	3.04465	0.00233	0/+
MLXIPL	THAP9	-0.10065	0.024126	0.33137	0.011056	3.04459	0.00233	-/+
ARHGEF15	THAP9	0.453027	0	0.043129	0.747865	-3.04455	0.00233	#ERROR!
CHST11	THAP9	0.209311	2.24e-06	-0.22875	0.084142	-3.04435	0.002332	#ERROR!
KCNN2	THAP9	0.381287	0	-0.04368	0.744747	-3.04404	0.002334	#ERROR!
SARAF	THAP9	0.521896	0	0.771564	1.36e-12	3.04381	0.002336	#ERROR!
PAFAH1B1	THAP9	0.627795	0	0.828381	8.88e-16	3.04344	0.002339	#ERROR!
DDX19A	THAP9	0.540997	0	0.782066	4.24e-13	3.04288	0.002343	#ERROR!
B3GNT5	THAP9	0.210411	1.98e-06	0.577429	2.08e-06	3.04215	0.002349	#ERROR!
C2orf69	THAP9	0.481653	0	0.748739	1.4e-11	3.04179	0.002352	#ERROR!
SSX3	THAP9	0.301084	5.6e-12	-0.13321	0.318814	-3.04028	0.002364	#ERROR!
STARD3NL	THAP9	0.52144	0	0.771084	1.43e-12	3.03999	0.002366	#ERROR!
PGM1	THAP9	0.160781	0.000298	0.541897	1.12e-05	3.03978	0.002368	#ERROR!
CPNE3	THAP9	0.571713	0	0.798573	5.93e-14	3.03941	0.00237	#ERROR!
TIMD4	THAP9	0.109033	0.014521	-0.3231	0.013366	-3.03927	0.002372	#ERROR!
AGA	THAP9	0.371409	0	0.68295	3.51e-09	3.0392	0.002372	#ERROR!
CALCOCO1	THAP9	0.3215	1.56e-13	0.65147	3.06e-08	3.03896	0.002374	#ERROR!
FBLIM1	THAP9	0.141135	0.001523	0.527263	2.11e-05	3.03714	0.002388	#ERROR!
CORO7	THAP9	0.019753	0.658848	-0.40063	0.001831	-3.0364	0.002394	0/-
CLEC3B	THAP9	0.358801	0	-0.06841	0.609854	-3.03554	0.002401	#ERROR!
LOC100506100	THAP9	0.268849	9.26e-10	-0.16678	0.210836	-3.03515	0.002404	#ERROR!
NECAP1	THAP9	0.529523	0	0.775279	9.06e-13	3.03496	0.002406	#ERROR!
PCDHA12	THAP9	0.211807	1.68e-06	0.577667	2.06e-06	3.0346	0.002409	#ERROR!
PCLAF	THAP9	0.112769	0.011459	-0.31907	0.014637	-3.03438	0.00241	#ERROR!
NAA30	THAP9	0.664512	0	0.846776	0	3.03396	0.002414	#ERROR!
[truncated: 26,550 more rows]

## Sheet: UCEC
Gene1	Gene2	TCGA_UCEC.PrimarySolidTumor_cor	TCGA_UCEC.PrimarySolidTumor_pVal	TCGA_UCEC.SolidTissueNormal_cor	TCGA_UCEC.SolidTissueNormal_pVal	zScoreDiff	pValDiff	Classes
[truncated: 27,513 more rows]
