# Supplementary material for: Pan-Cancer Analysis Reveals the Prognostic Potential of the THAP9/THAP9-AS1 Sense–Antisense Gene Pair in Human Cancers
Source: Noncoding RNA. 2022 Jul 8;8(4):51. doi: 10.3390/ncrna8040051 (PMC9326536; doi:10.3390/ncrna8040051)
Supplement: Supplementary file 1 [file ncrna-08-00051-s001.zip › Supplementary Table S11_1.xlsx]

## Sheet: BLCA
Gene1	Gene2	TCGA_BLCA.PrimarySolidTumor_cor	TCGA_BLCA.PrimarySolidTumor_pVal	TCGA_BLCA.SolidTissueNormal_cor	TCGA_BLCA.SolidTissueNormal_pVal	zScoreDiff	pValDiff	Classes
LOC102724814	THAP9-AS1	0.507795	0	0.984211	3.18e-14	7.07849	1.46e-12	#ERROR!
MIR3972	THAP9-AS1	0.171344	0.000462	0.940329	2.21e-09	5.97603	2.29e-09	#ERROR!
FGD2	THAP9-AS1	-0.01386	0.778536	0.910526	6.25e-08	5.88695	3.93e-09	0/+
PRAG1	THAP9-AS1	-0.0011	0.982264	0.912281	5.31e-08	5.87777	4.16e-09	0/+
KLRK1	THAP9-AS1	0.260203	7.82e-08	0.945982	9.68e-10	5.81575	6.04e-09	#ERROR!
AMPD3	THAP9-AS1	0.19476	6.63e-05	0.935088	4.45e-09	5.71808	1.08e-08	#ERROR!
SLC23A3	THAP9-AS1	0.320952	2.26e-11	0.949453	5.57e-10	5.69268	1.25e-08	#ERROR!
ABHD14A-ACY1	THAP9-AS1	0.365873	1.47e-14	0.95205	3.59e-10	5.60158	2.12e-08	#ERROR!
KCNC3	THAP9-AS1	0.317309	3.89e-11	0.945614	1.02e-09	5.56487	2.62e-08	#ERROR!
ARHGAP27P1-BPTFP1-KPNA2P3	THAP9-AS1	0.447013	0	0.957895	1.21e-10	5.48408	4.16e-08	#ERROR!
MIR429	THAP9-AS1	0.41167	0	0.95402	2.53e-10	5.47771	4.31e-08	#ERROR!
PLSCR3	THAP9-AS1	0.320466	2.43e-11	0.942105	1.72e-09	5.42889	5.67e-08	#ERROR!
GCSAM	THAP9-AS1	0.310739	1.02e-10	0.940351	2.21e-09	5.41144	6.25e-08	#ERROR!
LINC01176	THAP9-AS1	0.39896	0	0.950877	4.39e-10	5.40662	6.42e-08	#ERROR!
RUFY4	THAP9-AS1	0.125044	0.010878	0.91037	6.34e-08	5.3515	8.72e-08	#ERROR!
DLEC1	THAP9-AS1	0.388284	2.22e-16	0.948201	6.83e-10	5.35105	8.74e-08	#ERROR!
GPS2	THAP9-AS1	0.509938	0	0.961404	5.86e-11	5.34197	9.19e-08	#ERROR!
COX6B2	THAP9-AS1	0.113113	0.021339	0.907498	8.2e-08	5.33464	9.57e-08	#ERROR!
HYPK	THAP9-AS1	0.485169	0	0.957895	1.21e-10	5.29822	1.17e-07	#ERROR!
NLRP1	THAP9-AS1	0.125706	0.010462	0.907018	8.56e-08	5.2756	1.32e-07	#ERROR!
CPNE7	THAP9-AS1	0.191287	8.98e-05	0.916925	3.4e-08	5.24368	1.57e-07	#ERROR!
LINC01451	THAP9-AS1	0.198444	4.78e-05	0.9174	3.24e-08	5.22673	1.73e-07	#ERROR!
RAPGEF3	THAP9-AS1	0.040522	0.41088	0.887719	3.97e-07	5.22394	1.75e-07	0/+
PKP2	THAP9-AS1	0.197313	5.29e-05	0.914035	4.5e-08	5.15176	2.58e-07	#ERROR!
AP1S3	THAP9-AS1	0.189641	0.000103	0.912281	5.31e-08	5.14189	2.72e-07	#ERROR!
CLMN	THAP9-AS1	0.254326	1.56e-07	0.921053	2.24e-08	5.09196	3.54e-07	#ERROR!
LINC00954	THAP9-AS1	0.311339	9.34e-11	0.929763	8.53e-09	5.08709	3.64e-07	#ERROR!
OLR1	THAP9-AS1	-0.09417	0.055546	0.845108	5.26e-06	5.08183	3.74e-07	0/+
ADGRB1	THAP9-AS1	0.061219	0.213863	0.882843	5.61e-07	5.0589	4.22e-07	0/+
CLUHP3	THAP9-AS1	0.563324	0	0.961404	5.86e-11	5.05593	4.28e-07	#ERROR!
CES4A	THAP9-AS1	0.419179	0	0.94386	1.33e-09	5.0527	4.36e-07	#ERROR!
CCNL2	THAP9-AS1	0.557385	0	0.959649	8.5e-11	5.00251	5.66e-07	#ERROR!
SEMA3F-AS1	THAP9-AS1	0.454347	0	0.946907	8.39e-10	4.99635	5.84e-07	#ERROR!
EPHB6	THAP9-AS1	0.154542	0.001611	0.898246	1.79e-07	4.98287	6.26e-07	#ERROR!
OASL	THAP9-AS1	0.008953	0.855877	0.864912	1.77e-06	4.96876	6.74e-07	0/+
MAP3K21	THAP9-AS1	0.285299	3.41e-09	0.921053	2.24e-08	4.96462	6.88e-07	#ERROR!
EGFL8	THAP9-AS1	0.406151	0	0.939421	2.51e-09	4.96318	6.93e-07	#ERROR!
CYP3A5	THAP9-AS1	0.312633	7.73e-11	0.924561	1.54e-08	4.94032	7.8e-07	#ERROR!
PWRN1	THAP9-AS1	0.226311	3.3e-06	0.909663	6.76e-08	4.93711	7.93e-07	#ERROR!
RNU6-833P	THAP9-AS1	0.22987	2.28e-06	0.909695	6.74e-08	4.92353	8.5e-07	#ERROR!
MIRLET7BHG	THAP9-AS1	0.196126	5.88e-05	0.903028	1.21e-07	4.91585	8.84e-07	#ERROR!
CGB7	THAP9-AS1	0.230682	2.1e-06	0.90926	7.01e-08	4.91066	9.08e-07	#ERROR!
GABRE	THAP9-AS1	0.195915	5.99e-05	0.901754	1.34e-07	4.89055	1.01e-06	#ERROR!
SLC2A9	THAP9-AS1	0.065699	0.182148	0.873684	1.03e-06	4.88901	1.01e-06	0/+
LOC100128770	THAP9-AS1	0.405686	0	0.936733	3.6e-09	4.8799	1.06e-06	#ERROR!
RAB11FIP1	THAP9-AS1	0.245669	4.16e-07	0.910526	6.25e-08	4.87815	1.07e-06	#ERROR!
LAMB3	THAP9-AS1	0.052382	0.287634	0.868421	1.43e-06	4.85678	1.19e-06	0/+
GIPR	THAP9-AS1	0.222599	4.81e-06	0.90518	1e-07	4.85525	1.2e-06	#ERROR!
OSBPL3	THAP9-AS1	0.147753	0.00258	0.887231	4.12e-07	4.80239	1.57e-06	#ERROR!
LINC02532	THAP9-AS1	0.178918	0.000253	0.893582	2.57e-07	4.79721	1.61e-06	#ERROR!
LIPI	THAP9-AS1	0.335834	2.26e-12	-0.71881	0.000525	-4.78195	1.74e-06	#ERROR!
FAM153A	THAP9-AS1	0.147489	0.002627	0.885766	4.57e-07	4.77733	1.78e-06	#ERROR!
FGF17	THAP9-AS1	0.218232	7.43e-06	0.900437	1.5e-07	4.77497	1.8e-06	#ERROR!
CYP4F35P	THAP9-AS1	0.215525	9.68e-06	0.899826	1.57e-07	4.77351	1.81e-06	#ERROR!
ITGA2	THAP9-AS1	0.015832	0.748078	0.853006	3.47e-06	4.76935	1.85e-06	0/+
PLA2G6	THAP9-AS1	0.430576	0	0.935088	4.45e-09	4.71438	2.42e-06	#ERROR!
CTBP1-AS	THAP9-AS1	0.512395	0	0.946907	8.39e-10	4.7074	2.51e-06	#ERROR!
ABCC3	THAP9-AS1	0.191821	8.58e-05	0.891228	3.07e-07	4.70221	2.57e-06	#ERROR!
ADGRF4	THAP9-AS1	0.19369	7.29e-05	0.891619	2.98e-07	4.70206	2.58e-06	#ERROR!
EDEM1	THAP9-AS1	0.234191	1.45e-06	0.9	1.55e-07	4.70206	2.58e-06	#ERROR!
PYGL	THAP9-AS1	0.101179	0.039614	0.870175	1.28e-06	4.69701	2.64e-06	#ERROR!
AFG3L1P	THAP9-AS1	0.57327	0	0.954805	2.19e-10	4.69271	2.7e-06	#ERROR!
ANKDD1B	THAP9-AS1	0.359805	4.24e-14	0.920984	2.25e-08	4.64568	3.39e-06	#ERROR!
ALDH1L1	THAP9-AS1	0.13009	0.008044	0.873684	1.03e-06	4.6411	3.47e-06	#ERROR!
BAIAP3	THAP9-AS1	0.176994	0.000296	0.884211	5.1e-07	4.63447	3.58e-06	#ERROR!
RASEF	THAP9-AS1	0.447959	0	0.935088	4.45e-09	4.63228	3.62e-06	#ERROR!
RUNX1	THAP9-AS1	0.199127	4.5e-05	0.887719	3.97e-07	4.6092	4.04e-06	#ERROR!
ITGB4	THAP9-AS1	0.103182	0.035844	0.863158	1.96e-06	4.5818	4.61e-06	#ERROR!
D2HGDH	THAP9-AS1	0.351381	1.79e-13	0.915789	3.8e-08	4.55594	5.22e-06	#ERROR!
INPP4B	THAP9-AS1	0.172848	0.000411	0.877193	8.2e-07	4.53152	5.86e-06	#ERROR!
PLEK2	THAP9-AS1	0.114506	0.019781	0.862659	2.02e-06	4.53068	5.88e-06	#ERROR!
CREG2	THAP9-AS1	0.051507	0.295776	0.843587	5.69e-06	4.50511	6.63e-06	0/+
ITGB6	THAP9-AS1	0.152465	0.001864	0.870175	1.28e-06	4.49829	6.85e-06	#ERROR!
COL11A2	THAP9-AS1	0.320458	2.43e-11	0.907335	8.32e-08	4.49806	6.86e-06	#ERROR!
DOCK8	THAP9-AS1	0.174695	0.000355	0.875439	9.19e-07	4.49545	6.94e-06	#ERROR!
LPAR6	THAP9-AS1	0.133917	0.006355	0.864912	1.77e-06	4.48936	7.14e-06	#ERROR!
KCNAB3	THAP9-AS1	0.403158	0	0.922334	1.95e-08	4.48643	7.24e-06	#ERROR!
MST1	THAP9-AS1	0.377103	2e-15	0.917544	3.2e-08	4.48475	7.3e-06	#ERROR!
MAPK15	THAP9-AS1	0.280662	6.23e-09	0.898552	1.74e-07	4.48345	7.34e-06	#ERROR!
PTK2B	THAP9-AS1	0.095791	0.051458	0.854386	3.22e-06	4.48285	7.37e-06	0/+
ADGRE4P	THAP9-AS1	-0.03522	0.474818	0.814266	2.2e-05	4.47791	7.54e-06	0/+
SLC16A8	THAP9-AS1	0.433659	0	0.927129	1.16e-08	4.47167	7.76e-06	#ERROR!
CFAP70	THAP9-AS1	0.409898	0	0.922807	1.86e-08	4.46775	7.9e-06	#ERROR!
IFNWP19	THAP9-AS1	0.09168	0.062364	0.850989	3.87e-06	4.45122	8.54e-06	0/+
NPAP1	THAP9-AS1	0.172637	0.000418	0.872165	1.13e-06	4.45077	8.56e-06	#ERROR!
FER1L4	THAP9-AS1	0.350553	2.05e-13	0.910526	6.25e-08	4.43875	9.05e-06	#ERROR!
EHD4-AS1	THAP9-AS1	0.243426	5.34e-07	0.887531	4.03e-07	4.42824	9.5e-06	#ERROR!
ADA2	THAP9-AS1	-0.000244	0.996047	0.821053	1.65e-05	4.4226	9.75e-06	0/+
C10orf55	THAP9-AS1	-0.00369	0.940302	0.819658	1.75e-05	4.41949	9.89e-06	0/+
CLEC4F	THAP9-AS1	0.070707	0.150969	0.842475	6.01e-06	4.41701	1e-05	0/+
CAPG	THAP9-AS1	-0.01212	0.805836	0.815789	2.07e-05	4.4071	1.05e-05	0/+
LOC101928988	THAP9-AS1	0.19821	4.88e-05	0.875538	9.14e-07	4.4042	1.06e-05	#ERROR!
CBWD3	THAP9-AS1	0.537633	0	0.942055	1.73e-09	4.40316	1.07e-05	#ERROR!
NUTM1	THAP9-AS1	0.132442	0.006964	0.858417	2.57e-06	4.39893	1.09e-05	#ERROR!
DDX60L	THAP9-AS1	0.172747	0.000414	0.868421	1.43e-06	4.39151	1.13e-05	#ERROR!
INPP1	THAP9-AS1	0.166033	0.000695	0.866667	1.59e-06	4.39082	1.13e-05	#ERROR!
KIFC2	THAP9-AS1	0.418249	0	0.921053	2.24e-08	4.38476	1.16e-05	#ERROR!
LINC01012	THAP9-AS1	0.321187	2.18e-11	0.901414	1.38e-07	4.37099	1.24e-05	#ERROR!
MIR200B	THAP9-AS1	0.351134	1.86e-13	0.907401	8.27e-08	4.36768	1.26e-05	#ERROR!
CYP4F26P	THAP9-AS1	0.279096	7.61e-09	0.891982	2.9e-07	4.36374	1.28e-05	#ERROR!
ITGA6	THAP9-AS1	0.083394	0.090143	0.842105	6.13e-06	4.36351	1.28e-05	0/+
PLCH2	THAP9-AS1	0.194401	6.85e-05	0.871435	1.19e-06	4.35332	1.34e-05	#ERROR!
CARD10	THAP9-AS1	-0.01789	0.716644	0.808772	2.77e-05	4.35048	1.36e-05	0/+
PTBP2	THAP9-AS1	0.544871	0	-0.47719	0.038829	-4.3087	1.64e-05	#ERROR!
HELZ2	THAP9-AS1	0.170704	0.000486	0.861404	2.17e-06	4.29333	1.76e-05	#ERROR!
GPC1	THAP9-AS1	0.036926	0.453661	0.821053	1.65e-05	4.28086	1.86e-05	0/+
CSMD1	THAP9-AS1	0.064425	0.19079	0.829675	1.12e-05	4.27889	1.88e-05	0/+
B3GNT3	THAP9-AS1	0.188483	0.000114	0.864912	1.77e-06	4.27576	1.9e-05	#ERROR!
SLC46A2	THAP9-AS1	0.071238	0.147914	0.831137	1.04e-05	4.27075	1.95e-05	0/+
INSL3	THAP9-AS1	0.149723	0.002255	0.854131	3.26e-06	4.27048	1.95e-05	#ERROR!
ERVV-1	THAP9-AS1	0.169759	0.000523	0.859476	2.42e-06	4.26875	1.97e-05	#ERROR!
BCL2L10	THAP9-AS1	0.17182	0.000445	0.859526	2.41e-06	4.26138	2.03e-05	#ERROR!
CALML6	THAP9-AS1	0.268075	3.03e-08	0.88361	5.32e-07	4.25843	2.06e-05	#ERROR!
OR5M11	THAP9-AS1	0.288695	2.17e-09	0.888168	3.85e-07	4.25397	2.1e-05	#ERROR!
CLDN16	THAP9-AS1	0.087075	0.076774	0.83392	9.14e-06	4.24457	2.19e-05	0/+
ARHGAP8	THAP9-AS1	0.339895	1.18e-12	0.89864	1.73e-07	4.23526	2.28e-05	#ERROR!
PLEKHN1	THAP9-AS1	0.242472	5.93e-07	0.875439	9.19e-07	4.22523	2.39e-05	#ERROR!
RAP1GAP2	THAP9-AS1	0.314842	5.6e-11	0.892497	2.79e-07	4.22391	2.4e-05	#ERROR!
INTS6L	THAP9-AS1	0.425991	0	0.915789	3.8e-08	4.22063	2.44e-05	#ERROR!
MDM2	THAP9-AS1	0.182814	0.000184	0.859649	2.4e-06	4.21991	2.44e-05	#ERROR!
PMFBP1	THAP9-AS1	0.359805	4.24e-14	0.902065	1.31e-07	4.21773	2.47e-05	#ERROR!
CAMK1G	THAP9-AS1	-0.08027	0.102911	0.77221	0.000107	4.21654	2.48e-05	0/+
PTCHD1	THAP9-AS1	0.171088	0.000472	-0.7319	0.000368	-4.21415	2.51e-05	#ERROR!
PTPN3	THAP9-AS1	0.328328	7.33e-12	0.894737	2.35e-07	4.20896	2.57e-05	#ERROR!
CDH20	THAP9-AS1	0.101119	0.039733	0.835024	8.67e-06	4.20441	2.62e-05	#ERROR!
OGT	THAP9-AS1	0.544285	0	0.936842	3.54e-09	4.19803	2.69e-05	#ERROR!
NADK2	THAP9-AS1	0.307973	1.52e-10	-0.65439	0.002367	-4.19753	2.7e-05	#ERROR!
SLCO3A1	THAP9-AS1	0.028084	0.568802	0.810526	2.58e-05	4.19461	2.73e-05	0/+
LOC100996351	THAP9-AS1	0.28332	4.41e-09	0.883512	5.35e-07	4.19383	2.74e-05	#ERROR!
SLC7A8	THAP9-AS1	0.104242	0.033973	0.835088	8.65e-06	4.19318	2.75e-05	#ERROR!
FERMT1	THAP9-AS1	0.164461	0.000782	0.852632	3.54e-06	4.19185	2.77e-05	#ERROR!
CAPN8	THAP9-AS1	0.147203	0.002678	0.847101	4.75e-06	4.18337	2.87e-05	#ERROR!
SH3BP4	THAP9-AS1	0.015929	0.746579	0.805263	3.19e-05	4.1832	2.87e-05	0/+
OCLN	THAP9-AS1	0.327718	8.05e-12	0.892982	2.69e-07	4.1783	2.94e-05	#ERROR!
JMJD7-PLA2G4B	THAP9-AS1	0.462614	0	0.921053	2.24e-08	4.17488	2.98e-05	#ERROR!
DSG2	THAP9-AS1	0.256159	1.26e-07	0.875439	9.19e-07	4.1696	3.05e-05	#ERROR!
RORC	THAP9-AS1	0.140881	0.004077	0.84423	5.5e-06	4.16955	3.05e-05	#ERROR!
MLPH	THAP9-AS1	0.250418	2.44e-07	0.873684	1.03e-06	4.16454	3.12e-05	#ERROR!
BTBD19	THAP9-AS1	-0.03607	0.464197	0.784211	7.06e-05	4.16348	3.13e-05	0/+
SH3TC1	THAP9-AS1	-0.0128	0.795162	0.792982	5.13e-05	4.16315	3.14e-05	0/+
NOL6	THAP9-AS1	0.33137	4.57e-12	0.892982	2.69e-07	4.16268	3.15e-05	#ERROR!
CELSR1	THAP9-AS1	0.118692	0.01568	0.836842	7.95e-06	4.15962	3.19e-05	#ERROR!
IGFBP2	THAP9-AS1	0.120465	0.014182	0.836842	7.95e-06	4.15276	3.28e-05	#ERROR!
KLHL23	THAP9-AS1	0.315947	4.76e-11	-0.64211	0.003035	-4.15046	3.32e-05	#ERROR!
CD9	THAP9-AS1	0.262899	5.67e-08	0.875439	9.19e-07	4.14205	3.44e-05	#ERROR!
GOLGA7B	THAP9-AS1	0.047001	0.340099	0.812281	2.39e-05	4.14198	3.44e-05	0/+
COL17A1	THAP9-AS1	0.002107	0.965902	0.795963	4.58e-05	4.13714	3.52e-05	0/+
ACSL5	THAP9-AS1	0.26564	4.08e-08	0.875439	9.19e-07	4.13082	3.61e-05	#ERROR!
DNAJB3	THAP9-AS1	0.176715	0.000302	0.851568	3.75e-06	4.12895	3.64e-05	#ERROR!
LINC00707	THAP9-AS1	-0.03888	0.430067	0.779552	8.33e-05	4.12853	3.65e-05	0/+
IFITM10	THAP9-AS1	0.221394	5.43e-06	0.863158	1.96e-06	4.11842	3.81e-05	#ERROR!
GJB1	THAP9-AS1	0.130744	0.00773	0.836784	7.97e-06	4.11221	3.92e-05	#ERROR!
PABPC1L	THAP9-AS1	0.529	0	0.93111	7.27e-09	4.10865	3.98e-05	#ERROR!
MEGF6	THAP9-AS1	0.105842	0.031311	0.82807	1.2e-05	4.1003	4.13e-05	#ERROR!
MDFI	THAP9-AS1	-0.01014	0.836965	0.787719	6.23e-05	4.09958	4.14e-05	0/+
HAS3	THAP9-AS1	0.230793	2.08e-06	0.864414	1.82e-06	4.09952	4.14e-05	#ERROR!
SH2D3A	THAP9-AS1	0.288287	2.3e-09	0.878947	7.3e-07	4.09534	4.22e-05	#ERROR!
ADIRF-AS1	THAP9-AS1	0.302578	3.26e-10	0.882456	5.76e-07	4.09527	4.22e-05	#ERROR!
CLDN9	THAP9-AS1	0.077878	0.113606	0.817787	1.9e-05	4.08634	4.38e-05	0/+
DUSP4	THAP9-AS1	0.132077	0.007123	0.835088	8.65e-06	4.08558	4.4e-05	#ERROR!
CHAD	THAP9-AS1	0.365993	1.44e-14	0.896795	2e-07	4.08538	4.4e-05	#ERROR!
HIP1R	THAP9-AS1	0.438707	0	0.912281	5.31e-08	4.07972	4.51e-05	#ERROR!
GET4	THAP9-AS1	0.3835	4.44e-16	0.900395	1.5e-07	4.07903	4.52e-05	#ERROR!
HS3ST6	THAP9-AS1	0.096637	0.049422	0.823041	1.51e-05	4.07555	4.59e-05	#ERROR!
ALDH1A3	THAP9-AS1	0.029573	0.548479	0.8	3.92e-05	4.07478	4.61e-05	0/+
NOTUM	THAP9-AS1	0.02805	0.56927	0.799123	4.06e-05	4.07132	4.67e-05	0/+
MOV10	THAP9-AS1	0.337576	1.71e-12	0.889474	3.5e-07	4.07102	4.68e-05	#ERROR!
NR6A1	THAP9-AS1	0.399832	0	0.903509	1.16e-07	4.06915	4.72e-05	#ERROR!
CYP4Z1	THAP9-AS1	0.35063	2.03e-13	0.89231	2.83e-07	4.06699	4.76e-05	#ERROR!
CCRL2	THAP9-AS1	0.051591	0.294986	0.807018	2.97e-05	4.0662	4.78e-05	0/+
CAPN3	THAP9-AS1	0.268231	2.97e-08	0.87193	1.15e-06	4.06367	4.83e-05	#ERROR!
CXCL16	THAP9-AS1	0.047638	0.333586	0.805263	3.19e-05	4.06221	4.86e-05	0/+
ADSS1	THAP9-AS1	0.271375	2.02e-08	0.872313	1.12e-06	4.05684	4.97e-05	#ERROR!
LPA	THAP9-AS1	0.175916	0.000322	0.845985	5.03e-06	4.05597	4.99e-05	#ERROR!
LINC01806	THAP9-AS1	-0.00452	0.926975	0.785403	6.77e-05	4.05498	5.01e-05	0/+
PAK6	THAP9-AS1	0.250689	2.37e-07	0.8667	1.59e-06	4.05376	5.04e-05	#ERROR!
PARP12	THAP9-AS1	0.123486	0.011917	0.829825	1.11e-05	4.05352	5.05e-05	#ERROR!
CATSPER2	THAP9-AS1	0.523808	0	0.92807	1.04e-08	4.05072	5.11e-05	#ERROR!
CLEC9A	THAP9-AS1	-0.08725	0.07617	0.750989	0.000211	4.05063	5.11e-05	0/+
LOC100421620	THAP9-AS1	0.258333	9.76e-08	0.868482	1.42e-06	4.05007	5.12e-05	#ERROR!
HAGLR	THAP9-AS1	0.238541	9.11e-07	0.863158	1.96e-06	4.04941	5.13e-05	#ERROR!
ATG16L2	THAP9-AS1	0.437264	0	0.910526	6.25e-08	4.04704	5.19e-05	#ERROR!
DBH-AS1	THAP9-AS1	0.018334	0.70994	0.792982	5.13e-05	4.04448	5.24e-05	0/+
AP5B1	THAP9-AS1	0.260884	7.22e-08	0.868421	1.43e-06	4.0387	5.37e-05	#ERROR!
CYP4F29P	THAP9-AS1	0.168595	0.000572	0.841829	6.21e-06	4.02968	5.59e-05	#ERROR!
SEMA4B	THAP9-AS1	0.19948	4.36e-05	0.850877	3.89e-06	4.02942	5.59e-05	#ERROR!
RIPK3	THAP9-AS1	0.224419	4e-06	0.857895	2.65e-06	4.02897	5.6e-05	#ERROR!
FAM167A	THAP9-AS1	-0.10175	0.038513	0.741653	0.000279	4.02604	5.67e-05	-/+
AJM1	THAP9-AS1	0.280719	6.18e-09	-0.64561	0.00283	-4.02589	5.68e-05	#ERROR!
CROT	THAP9-AS1	0.305434	2.18e-10	0.878947	7.3e-07	4.02366	5.73e-05	#ERROR!
CNDP2	THAP9-AS1	0.294091	1.05e-09	0.875439	9.19e-07	4.01315	5.99e-05	#ERROR!
KNDC1	THAP9-AS1	-0.02381	0.629057	0.773486	0.000103	4.01277	6e-05	0/+
OBSCN-AS1	THAP9-AS1	0.261432	6.76e-08	0.866815	1.58e-06	4.0117	6.03e-05	#ERROR!
ARAP2	THAP9-AS1	0.366449	1.33e-14	0.892982	2.69e-07	4.01041	6.06e-05	#ERROR!
IL17RA	THAP9-AS1	0.187117	0.000128	0.845614	5.13e-06	4.00685	6.15e-05	#ERROR!
MIR103A2	THAP9-AS1	0.224508	3.96e-06	0.856266	2.9e-06	4.00521	6.2e-05	#ERROR!
SEMA4A	THAP9-AS1	0.338941	1.38e-12	0.885965	4.51e-07	4.00204	6.28e-05	#ERROR!
CYB5R1	THAP9-AS1	0.165027	0.00075	0.838596	7.29e-06	4.00176	6.29e-05	#ERROR!
ARL4C	THAP9-AS1	-0.11702	0.017221	0.731579	0.000371	4.00099	6.31e-05	-/+
POU2F3	THAP9-AS1	0.239413	8.29e-07	0.860026	2.35e-06	3.99955	6.35e-05	#ERROR!
ADAM8	THAP9-AS1	0.110687	0.024306	0.821053	1.65e-05	3.99804	6.39e-05	#ERROR!
LINC01572	THAP9-AS1	0.345643	4.63e-13	0.887133	4.14e-07	3.99391	6.5e-05	#ERROR!
LOC105370792	THAP9-AS1	0.108664	0.027046	0.81991	1.73e-05	3.99251	6.54e-05	#ERROR!
ECHDC2	THAP9-AS1	0.528193	0	0.926316	1.27e-08	3.97995	6.89e-05	#ERROR!
LMBR1L	THAP9-AS1	0.484943	0	0.917544	3.2e-08	3.97876	6.93e-05	#ERROR!
NLRP2	THAP9-AS1	0.014924	0.762075	0.784899	6.89e-05	3.97587	7.01e-05	0/+
PDXP-DT	THAP9-AS1	0.361389	3.22e-14	0.889783	3.42e-07	3.97328	7.09e-05	#ERROR!
CASP8	THAP9-AS1	0.336489	2.04e-12	0.883721	5.27e-07	3.97319	7.09e-05	#ERROR!
PLK2	THAP9-AS1	-0.01719	0.727306	0.77193	0.000108	3.9728	7.1e-05	0/+
ABHD12B	THAP9-AS1	0.149088	0.002355	0.831066	1.05e-05	3.96933	7.21e-05	#ERROR!
BCAS1	THAP9-AS1	0.272095	1.84e-08	0.866667	1.59e-06	3.96566	7.32e-05	#ERROR!
FBXO2	THAP9-AS1	-0.06249	0.204448	0.752084	0.000204	3.96532	7.33e-05	0/+
ITPR3	THAP9-AS1	0.234048	1.47e-06	0.85614	2.92e-06	3.96504	7.34e-05	#ERROR!
FAM151A	THAP9-AS1	0.251233	2.22e-07	0.860904	2.23e-06	3.9645	7.36e-05	#ERROR!
SMAD3	THAP9-AS1	0.248219	3.13e-07	0.859649	2.4e-06	3.95835	7.55e-05	#ERROR!
PSTPIP2	THAP9-AS1	0.11158	0.023174	0.817903	1.89e-05	3.95804	7.56e-05	#ERROR!
MCTP2	THAP9-AS1	0.26275	5.78e-08	0.863537	1.91e-06	3.95661	7.6e-05	#ERROR!
CDK3	THAP9-AS1	0.513132	0	0.922334	1.95e-08	3.95448	7.67e-05	#ERROR!
LMNTD2-AS1	THAP9-AS1	0.459183	0	0.911022	5.97e-08	3.95356	7.7e-05	#ERROR!
NDOR1	THAP9-AS1	0.322282	1.85e-11	0.878947	7.3e-07	3.95242	7.74e-05	#ERROR!
MYO6	THAP9-AS1	0.465887	0	0.912281	5.31e-08	3.94945	7.83e-05	#ERROR!
PMAIP1	THAP9-AS1	0.173551	0.000389	0.836842	7.95e-06	3.94589	7.95e-05	#ERROR!
CWH43	THAP9-AS1	0.133953	0.006341	0.824254	1.43e-05	3.94576	7.95e-05	#ERROR!
LIMA1	THAP9-AS1	0.073466	0.135616	0.803509	3.42e-05	3.94444	8e-05	0/+
ALS2CL	THAP9-AS1	0.270965	2.12e-08	0.864912	1.77e-06	3.94361	8.03e-05	#ERROR!
LOC101927911	THAP9-AS1	0.182928	0.000182	0.839211	7.08e-06	3.9393	8.17e-05	#ERROR!
SCG2	THAP9-AS1	-0.14472	0.003165	0.709706	0.000665	3.9349	8.32e-05	-/+
FAT2	THAP9-AS1	0.076312	0.121072	0.803509	3.42e-05	3.93354	8.37e-05	0/+
LINC02593	THAP9-AS1	0.112091	0.022548	0.815789	2.07e-05	3.93186	8.43e-05	#ERROR!
MICALL2	THAP9-AS1	0.23015	2.22e-06	0.852632	3.54e-06	3.93121	8.45e-05	#ERROR!
AFAP1L2	THAP9-AS1	-0.00555	0.910376	0.77193	0.000108	3.92843	8.55e-05	0/+
ADAM28	THAP9-AS1	0.097859	0.046602	0.810526	2.58e-05	3.92749	8.58e-05	#ERROR!
CCDC160	THAP9-AS1	0.272972	1.65e-08	0.864296	1.83e-06	3.92604	8.64e-05	#ERROR!
EFNB1	THAP9-AS1	0.140331	0.004225	0.824561	1.41e-05	3.92464	8.69e-05	#ERROR!
ENTPD3	THAP9-AS1	0.238126	9.53e-07	0.854386	3.22e-06	3.92368	8.72e-05	#ERROR!
RPL34P4	THAP9-AS1	0.266642	3.61e-08	0.862355	2.05e-06	3.92302	8.74e-05	#ERROR!
OVOL1-AS1	THAP9-AS1	0.296286	7.8e-10	0.869987	1.3e-06	3.9168	8.97e-05	#ERROR!
PLA2G4B	THAP9-AS1	0.384221	4.44e-16	0.892011	2.9e-07	3.91336	9.1e-05	#ERROR!
PTPRE	THAP9-AS1	0.106853	0.02972	0.812281	2.39e-05	3.91242	9.14e-05	#ERROR!
KRT17P3	THAP9-AS1	-0.05988	0.224088	0.746977	0.000238	3.91087	9.2e-05	0/+
ASTL	THAP9-AS1	0.278581	8.13e-09	0.864794	1.78e-06	3.91042	9.21e-05	#ERROR!
EXD3	THAP9-AS1	0.299808	4.8e-10	0.870175	1.28e-06	3.90502	9.42e-05	#ERROR!
RSRP1	THAP9-AS1	0.586963	0	0.935088	4.45e-09	3.90472	9.43e-05	#ERROR!
NRG1	THAP9-AS1	-0.13438	0.006175	0.710526	0.000651	3.90101	9.58e-05	-/+
SH3PXD2A-AS1	THAP9-AS1	-0.08876	0.071219	0.732543	0.000361	3.90004	9.62e-05	0/+
IRF9	THAP9-AS1	0.34649	4.03e-13	0.881966	5.95e-07	3.89971	9.63e-05	#ERROR!
ADRB1	THAP9-AS1	0.16449	0.00078	0.830258	1.09e-05	3.89921	9.65e-05	#ERROR!
AREG	THAP9-AS1	0.002448	0.960389	0.77193	0.000108	3.89794	9.7e-05	0/+
KRT42P	THAP9-AS1	0.098195	0.045851	0.807914	2.87e-05	3.89735	9.73e-05	#ERROR!
KRT18P39	THAP9-AS1	0.09535	0.052546	0.806837	2.99e-05	3.8965	9.76e-05	0/+
LOC101929240	THAP9-AS1	0.43008	0	0.901754	1.34e-07	3.89375	9.87e-05	#ERROR!
LMTK3	THAP9-AS1	0.175406	0.000336	0.833187	9.47e-06	3.89258	9.92e-05	#ERROR!
SIDT1	THAP9-AS1	0.336977	1.88e-12	0.878947	7.3e-07	3.88958	0.0001	#ERROR!
SEPTIN9-DT	THAP9-AS1	0.211966	1.37e-05	0.844061	5.55e-06	3.88752	0.000101	#ERROR!
IL1RAPL2	THAP9-AS1	0.195149	6.41e-05	0.838636	7.28e-06	3.8836	0.000103	#ERROR!
B3GNT4	THAP9-AS1	0.16671	0.00066	0.829675	1.12e-05	3.88337	0.000103	#ERROR!
SLC4A9	THAP9-AS1	0.303165	3e-10	0.869667	1.32e-06	3.88297	0.000103	#ERROR!
SEMA7A	THAP9-AS1	0.08057	0.101615	0.8	3.92e-05	3.87976	0.000105	0/+
RNF32-AS1	THAP9-AS1	0.277898	8.87e-09	0.862529	2.03e-06	3.87927	0.000105	#ERROR!
CHD7	THAP9-AS1	0.425616	0	0.9	1.55e-07	3.87908	0.000105	#ERROR!
LRRC8E	THAP9-AS1	0.220151	6.14e-06	0.845823	5.07e-06	3.87827	0.000105	#ERROR!
CCDC154	THAP9-AS1	0.118041	0.016265	0.812994	2.32e-05	3.87723	0.000106	#ERROR!
ARHGAP40	THAP9-AS1	0.221941	5.14e-06	0.846198	4.97e-06	3.87612	0.000106	#ERROR!
PPP1R1B	THAP9-AS1	0.137472	0.005079	0.819298	1.78e-05	3.87391	0.000107	#ERROR!
RUNX2	THAP9-AS1	0.013702	0.781041	0.773684	0.000102	3.87165	0.000108	0/+
PLXNB2	THAP9-AS1	0.288614	2.2e-09	0.864912	1.77e-06	3.87062	0.000109	#ERROR!
MACC1	THAP9-AS1	0.22192	5.15e-06	0.845614	5.13e-06	3.86838	0.00011	#ERROR!
PCA3	THAP9-AS1	0.043545	0.376836	-0.74883	0.000225	-3.8645	0.000111	0/-
ALDH4A1	THAP9-AS1	0.303136	3.01e-10	0.868421	1.43e-06	3.86369	0.000112	#ERROR!
POU5F1	THAP9-AS1	0.349826	2.31e-13	0.880702	6.49e-07	3.86365	0.000112	#ERROR!
KLRC4	THAP9-AS1	0.05204	0.290799	0.787456	6.29e-05	3.85974	0.000114	0/+
MIR31HG	THAP9-AS1	0.096628	0.049443	0.803683	3.4e-05	3.85739	0.000115	#ERROR!
C1orf74	THAP9-AS1	0.236547	1.13e-06	0.849123	4.27e-06	3.85697	0.000115	#ERROR!
C2orf66	THAP9-AS1	0.37113	5.77e-15	0.885569	4.63e-07	3.85463	0.000116	#ERROR!
RPS3AP20	THAP9-AS1	0.245414	4.28e-07	0.851251	3.81e-06	3.85035	0.000118	#ERROR!
PHLDA3	THAP9-AS1	0.023864	0.628267	0.775439	9.6e-05	3.84962	0.000118	0/+
ERMP1	THAP9-AS1	0.250367	2.45e-07	0.852632	3.54e-06	3.84943	0.000118	#ERROR!
GTPBP2	THAP9-AS1	0.470474	0	0.908772	7.32e-08	3.84881	0.000119	#ERROR!
PERM1	THAP9-AS1	0.209046	1.8e-05	0.840211	6.74e-06	3.8487	0.000119	#ERROR!
KLRD1	THAP9-AS1	-0.058	0.23897	0.740123	0.000291	3.84527	0.00012	0/+
ITGA3	THAP9-AS1	0.052052	0.29069	0.785965	6.63e-05	3.84478	0.000121	0/+
PTPRN2	THAP9-AS1	0.075649	0.124346	0.794737	4.8e-05	3.84355	0.000121	0/+
LEO1	THAP9-AS1	0.308185	1.47e-10	0.868421	1.43e-06	3.84246	0.000122	#ERROR!
APOBR	THAP9-AS1	0.052833	0.283495	0.785965	6.63e-05	3.84179	0.000122	0/+
HPGD	THAP9-AS1	0.29002	1.82e-09	0.863158	1.96e-06	3.83839	0.000124	#ERROR!
NIPAL1	THAP9-AS1	0.335873	2.25e-12	0.875439	9.19e-07	3.83631	0.000125	#ERROR!
C1orf194	THAP9-AS1	0.295613	8.55e-10	-0.60522	0.006039	-3.83469	0.000126	#ERROR!
HCG25	THAP9-AS1	0.47293	0	0.908613	7.43e-08	3.8333	0.000126	#ERROR!
GABRA3	THAP9-AS1	0.201152	3.75e-05	0.836557	8.06e-06	3.83323	0.000126	#ERROR!
PLEKHB2	THAP9-AS1	0.197619	5.15e-05	0.835088	8.65e-06	3.82867	0.000129	#ERROR!
CASP5	THAP9-AS1	-0.13535	0.005808	0.70045	0.000838	3.82833	0.000129	-/+
INAVA	THAP9-AS1	0.254736	1.49e-07	0.852374	3.59e-06	3.82805	0.000129	#ERROR!
DYNC1I1	THAP9-AS1	0.122154	0.012873	-0.70702	0.000712	-3.82676	0.00013	#ERROR!
EDDM13	THAP9-AS1	0.200964	3.81e-05	0.835821	8.35e-06	3.82465	0.000131	#ERROR!
RIN1	THAP9-AS1	-0.02769	0.574244	0.750877	0.000212	3.8218	0.000132	0/+
CTSD	THAP9-AS1	0.026835	0.586122	0.773684	0.000102	3.82157	0.000133	0/+
FAM160A1	THAP9-AS1	0.300763	4.2e-10	0.864912	1.77e-06	3.81991	0.000134	#ERROR!
IQCA1	THAP9-AS1	-0.03888	0.430059	0.745614	0.000248	3.81893	0.000134	0/+
CSF2RA	THAP9-AS1	-0.14052	0.004174	0.696491	0.000923	3.81893	0.000134	-/+
MC1R	THAP9-AS1	0.252492	1.92e-07	0.850877	3.89e-06	3.81642	0.000135	#ERROR!
MIR205HG	THAP9-AS1	0.14454	0.003203	0.816506	2e-05	3.81427	0.000137	#ERROR!
RNU6-418P	THAP9-AS1	0.362018	2.89e-14	0.880715	6.48e-07	3.81068	0.000139	#ERROR!
NTF4	THAP9-AS1	0.220285	6.06e-06	0.840741	6.56e-06	3.81067	0.000139	#ERROR!
EPM2A	THAP9-AS1	0.247025	3.58e-07	-0.63333	0.003603	-3.80863	0.00014	#ERROR!
DMPK	THAP9-AS1	0.318755	3.13e-11	-0.58421	0.008625	-3.8082	0.00014	#ERROR!
ARPC2	THAP9-AS1	0.134011	0.006318	0.812281	2.39e-05	3.80737	0.00014	#ERROR!
CSAD	THAP9-AS1	0.55784	0	0.925845	1.34e-08	3.80704	0.000141	#ERROR!
DGKA	THAP9-AS1	0.330397	5.32e-12	0.87193	1.15e-06	3.80327	0.000143	#ERROR!
ACP7	THAP9-AS1	0.00625	0.899109	0.763286	0.000144	3.80323	0.000143	0/+
CYP27C1	THAP9-AS1	-0.05339	0.278488	0.736842	0.00032	3.80011	0.000145	0/+
PROSER2	THAP9-AS1	0.087729	0.074577	0.794737	4.8e-05	3.7972	0.000146	0/+
FCHSD1	THAP9-AS1	0.458041	0	0.903509	1.16e-07	3.79707	0.000146	#ERROR!
DGKI	THAP9-AS1	-0.06021	0.221494	-0.78368	7.2e-05	-3.79086	0.00015	0/-
GJB4	THAP9-AS1	0.11249	0.022069	0.803165	3.47e-05	3.79068	0.00015	#ERROR!
NPM2	THAP9-AS1	0.123794	0.011704	0.807018	2.97e-05	3.78873	0.000151	#ERROR!
HRAT17	THAP9-AS1	-0.072	0.14363	-0.78779	6.21e-05	-3.78669	0.000153	0/-
HCAR3	THAP9-AS1	0.095538	0.052079	0.796491	4.49e-05	3.7854	0.000153	0/+
RASSF5	THAP9-AS1	0.225766	3.49e-06	0.840351	6.69e-06	3.78362	0.000155	#ERROR!
F2RL1	THAP9-AS1	0.247145	3.53e-07	0.846863	4.81e-06	3.7834	0.000155	#ERROR!
FAM3B	THAP9-AS1	0.322427	1.81e-11	0.868421	1.43e-06	3.78219	0.000155	#ERROR!
SLC25A4	THAP9-AS1	0.333284	3.38e-12	-0.56842	0.011107	-3.78004	0.000157	#ERROR!
OAS1	THAP9-AS1	0.210066	1.64e-05	0.835088	8.65e-06	3.77917	0.000157	#ERROR!
SH3GLB2	THAP9-AS1	0.439538	0	0.898246	1.79e-07	3.77889	0.000158	#ERROR!
MAPK8IP3	THAP9-AS1	0.500407	0	0.912281	5.31e-08	3.77776	0.000158	#ERROR!
SLC16A5	THAP9-AS1	0.167387	0.000627	0.821053	1.65e-05	3.77759	0.000158	#ERROR!
SLC26A8	THAP9-AS1	0.328879	6.73e-12	0.869836	1.31e-06	3.77672	0.000159	#ERROR!
ENC1	THAP9-AS1	0.167709	0.000612	0.821053	1.65e-05	3.77633	0.000159	#ERROR!
GALNT3	THAP9-AS1	0.292965	1.23e-09	0.859649	2.4e-06	3.77427	0.00016	#ERROR!
GCNT7	THAP9-AS1	0.364895	1.73e-14	0.879099	7.23e-07	3.77074	0.000163	#ERROR!
NMRK1	THAP9-AS1	0.331664	4.36e-12	0.870175	1.28e-06	3.77013	0.000163	#ERROR!
GPR87	THAP9-AS1	0.1229	0.012329	0.804922	3.23e-05	3.7694	0.000164	#ERROR!
DAPP1	THAP9-AS1	0.364639	1.82e-14	0.878947	7.3e-07	3.76933	0.000164	#ERROR!
RPL4P6	THAP9-AS1	0.110811	0.024146	0.800528	3.84e-05	3.76902	0.000164	#ERROR!
LINC00893	THAP9-AS1	0.46976	0	0.904783	1.04e-07	3.76676	0.000165	#ERROR!
NDFIP2	THAP9-AS1	0.270766	2.17e-08	0.852632	3.54e-06	3.76601	0.000166	#ERROR!
KLKP1	THAP9-AS1	0.038247	0.437669	0.772328	0.000107	3.76518	0.000166	0/+
ARHGEF9	THAP9-AS1	0.408413	0	-0.50351	0.027966	-3.76478	0.000167	#ERROR!
PLAGL2	THAP9-AS1	0.308716	1.36e-10	0.863158	1.96e-06	3.7601	0.00017	#ERROR!
PTPRO	THAP9-AS1	-0.04272	0.385937	0.736842	0.00032	3.75937	0.00017	0/+
BIN3	THAP9-AS1	0.254922	1.45e-07	0.847368	4.68e-06	3.75858	0.000171	#ERROR!
PRDM1	THAP9-AS1	-0.01747	0.723081	0.747368	0.000235	3.75233	0.000175	0/+
MPZL2	THAP9-AS1	0.239263	8.42e-07	0.842105	6.13e-06	3.7521	0.000175	#ERROR!
PPT2-EGFL8	THAP9-AS1	0.469032	0	0.903822	1.13e-07	3.75021	0.000177	#ERROR!
LYPD3	THAP9-AS1	0.028464	0.563586	0.766667	0.000129	3.7496	0.000177	0/+
OFD1	THAP9-AS1	0.553943	0	0.922807	1.86e-08	3.74901	0.000178	#ERROR!
PCDHGA1	THAP9-AS1	0.143323	0.003473	-0.68539	0.001201	-3.74885	0.000178	#ERROR!
RALGPS2	THAP9-AS1	0.38084	8.88e-16	0.881966	5.95e-07	3.7488	0.000178	#ERROR!
MOGAT2	THAP9-AS1	0.17557	0.000331	0.821271	1.63e-05	3.74801	0.000178	#ERROR!
GRAMD2A	THAP9-AS1	0.088628	0.071638	0.790167	5.69e-05	3.74692	0.000179	0/+
CNN2	THAP9-AS1	-0.00636	0.897388	0.750877	0.000212	3.74046	0.000184	0/+
MDM1	THAP9-AS1	0.425428	0	-0.48246	0.036432	-3.73726	0.000186	#ERROR!
RNF43	THAP9-AS1	0.261092	7.04e-08	0.847368	4.68e-06	3.73339	0.000189	#ERROR!
ANXA1	THAP9-AS1	-0.05032	0.307031	0.729825	0.00039	3.73054	0.000191	0/+
IL17RE	THAP9-AS1	0.09594	0.051095	0.791228	5.47e-05	3.7296	0.000192	0/+
MBNL1	THAP9-AS1	0.213178	1.22e-05	-0.64211	0.003035	-3.72874	0.000192	#ERROR!
GFI1B	THAP9-AS1	0.041401	0.400791	0.769511	0.000117	3.72667	0.000194	0/+
FKBP1B	THAP9-AS1	0.087617	0.074948	0.787719	6.23e-05	3.72609	0.000194	0/+
ERVK3-1	THAP9-AS1	0.558118	0	0.922807	1.86e-08	3.72598	0.000195	#ERROR!
LOC101927751	THAP9-AS1	0.229036	2.49e-06	0.836842	7.95e-06	3.7254	0.000195	#ERROR!
PPP1R36	THAP9-AS1	0.222871	4.68e-06	0.834577	8.86e-06	3.72153	0.000198	#ERROR!
KAT2A	THAP9-AS1	0.496194	0	0.908772	7.32e-08	3.72087	0.000199	#ERROR!
LARGE2	THAP9-AS1	0.121439	0.013413	0.799825	3.95e-05	3.7205	0.000199	#ERROR!
LOC388282	THAP9-AS1	0.076713	0.119123	0.782661	7.46e-05	3.71765	0.000201	0/+
OR13A1	THAP9-AS1	0.32348	1.54e-11	0.864414	1.82e-06	3.71644	0.000202	#ERROR!
RNVU1-32	THAP9-AS1	0.078051	0.112801	0.783031	7.37e-05	3.71617	0.000202	0/+
LINC00239	THAP9-AS1	0.0768	0.118706	0.782419	7.53e-05	3.71495	0.000203	0/+
FAM214B	THAP9-AS1	0.169243	0.000544	0.815789	2.07e-05	3.70955	0.000208	#ERROR!
PAQR7	THAP9-AS1	0.244399	4.8e-07	0.840351	6.69e-06	3.70844	0.000209	#ERROR!
PLCB2	THAP9-AS1	-0.02536	0.606938	0.738596	0.000304	3.70778	0.000209	0/+
CST6	THAP9-AS1	-0.04008	0.415974	0.73143	0.000373	3.70455	0.000212	0/+
ATP2C2-AS1	THAP9-AS1	0.284158	3.96e-09	0.852118	3.64e-06	3.70354	0.000213	#ERROR!
MTUS2	THAP9-AS1	0.250295	2.47e-07	0.841597	6.29e-06	3.70073	0.000215	#ERROR!
RPL32P1	THAP9-AS1	-0.00863	0.861029	0.74527	0.00025	3.70059	0.000215	0/+
CYP21A1P	THAP9-AS1	0.042112	0.392745	-0.72991	0.000389	-3.69986	0.000216	0/-
C6orf99	THAP9-AS1	0.081894	0.096102	0.782575	7.49e-05	3.69694	0.000218	0/+
LOC105369201	THAP9-AS1	0.173044	0.000405	0.815987	2.05e-05	3.69687	0.000218	#ERROR!
PPP1CB	THAP9-AS1	0.320141	2.55e-11	-0.56316	0.012052	-3.69445	0.00022	#ERROR!
MYBPC1	THAP9-AS1	0.166576	0.000667	0.813385	2.29e-05	3.69277	0.000222	#ERROR!
CACNB4	THAP9-AS1	0.140315	0.00423	-0.67895	0.001391	-3.69123	0.000223	#ERROR!
RAB38	THAP9-AS1	0.115469	0.018763	0.794737	4.8e-05	3.69035	0.000224	#ERROR!
ELOBP3	THAP9-AS1	0.050675	0.303654	-0.72463	0.000449	-3.68982	0.000224	0/-
RPS6KL1	THAP9-AS1	0.174647	0.000357	-0.65906	0.002147	-3.68819	0.000226	#ERROR!
LOC283299	THAP9-AS1	0.274695	1.33e-08	0.848072	4.51e-06	3.68707	0.000227	#ERROR!
FSTL4	THAP9-AS1	0.222472	4.87e-06	0.831579	1.02e-05	3.68579	0.000228	#ERROR!
ABCC5	THAP9-AS1	0.390105	2.22e-16	0.880702	6.49e-07	3.68573	0.000228	#ERROR!
GJB3	THAP9-AS1	0.020209	0.681814	0.75614	0.00018	3.6856	0.000228	0/+
GEMIN4	THAP9-AS1	0.228262	2.7e-06	0.833333	9.4e-06	3.68432	0.000229	#ERROR!
PSD	THAP9-AS1	0.007405	0.880593	-0.74386	0.000261	-3.68386	0.00023	0/-
DENND2D	THAP9-AS1	0.371201	5.77e-15	0.875439	9.19e-07	3.68238	0.000231	#ERROR!
CTPS1	THAP9-AS1	0.209766	1.68e-05	-0.63684	0.003366	-3.68118	0.000232	#ERROR!
COX20	THAP9-AS1	0.414485	0	-0.48091	0.037123	-3.67896	0.000234	#ERROR!
ARAP3	THAP9-AS1	0.224303	4.05e-06	0.831579	1.02e-05	3.67844	0.000235	#ERROR!
ENO2	THAP9-AS1	0.304556	2.47e-10	-0.57193	0.010511	-3.67795	0.000235	#ERROR!
AOAH	THAP9-AS1	-0.21448	1.07e-05	0.633333	0.003603	3.67758	0.000235	-/+
ACOT1	THAP9-AS1	0.127078	0.009644	-0.68421	0.001234	-3.67732	0.000236	#ERROR!
AP1G2	THAP9-AS1	0.528005	0	0.914035	4.5e-08	3.67497	0.000238	#ERROR!
CA12	THAP9-AS1	0.119577	0.014915	0.794737	4.8e-05	3.67447	0.000238	#ERROR!
PSD4	THAP9-AS1	0.353968	1.15e-13	0.870175	1.28e-06	3.67379	0.000239	#ERROR!
CASP7	THAP9-AS1	0.226884	3.11e-06	0.831579	1.02e-05	3.66808	0.000244	#ERROR!
SGPP2	THAP9-AS1	0.214968	1.02e-05	0.827556	1.23e-05	3.66665	0.000246	#ERROR!
ADPGK	THAP9-AS1	0.484725	0	0.903509	1.16e-07	3.66628	0.000246	#ERROR!
PLEKHG6	THAP9-AS1	0.337222	1.81e-12	0.864912	1.77e-06	3.66517	0.000247	#ERROR!
NWD1	THAP9-AS1	0.061026	0.215307	0.770852	0.000112	3.66423	0.000248	0/+
LOC100506282	THAP9-AS1	0.444608	0	0.893374	2.61e-07	3.66085	0.000251	#ERROR!
SEMA4D	THAP9-AS1	0.26218	6.18e-08	0.842105	6.13e-06	3.65889	0.000253	#ERROR!
SAMD9L	THAP9-AS1	0.043918	0.372752	0.763158	0.000144	3.65838	0.000254	0/+
GPR39	THAP9-AS1	0.136627	0.005359	0.799474	4e-05	3.65792	0.000254	#ERROR!
MFSD2A	THAP9-AS1	0.224291	4.05e-06	0.829825	1.11e-05	3.65692	0.000255	#ERROR!
CLDN4	THAP9-AS1	0.229917	2.27e-06	0.831579	1.02e-05	3.65588	0.000256	#ERROR!
CHPF2	THAP9-AS1	0.148268	0.002491	0.803509	3.42e-05	3.65564	0.000257	#ERROR!
FOXL1	THAP9-AS1	-0.1013	0.039377	0.694737	0.000963	3.65425	0.000258	-/+
ADNP-AS1	THAP9-AS1	0.47834	0	0.901273	1.4e-07	3.65206	0.00026	#ERROR!
PTGES3L	THAP9-AS1	0.141627	0.003883	-0.67222	0.001617	-3.64919	0.000263	#ERROR!
SERPINB5	THAP9-AS1	0.041782	0.396477	0.76086	0.000155	3.64566	0.000267	0/+
CATSPERG	THAP9-AS1	0.304079	2.64e-10	0.853883	3.31e-06	3.64512	0.000267	#ERROR!
OVOL1	THAP9-AS1	0.321922	1.95e-11	0.859149	2.47e-06	3.64507	0.000267	#ERROR!
KIAA1549L	THAP9-AS1	0.063206	0.199336	0.769636	0.000117	3.64449	0.000268	0/+
ARNT2	THAP9-AS1	0.200338	4.03e-05	-0.63684	0.003366	-3.64367	0.000269	#ERROR!
PADI3	THAP9-AS1	0.091857	0.061859	0.781044	7.9e-05	3.64367	0.000269	0/+
NADSYN1	THAP9-AS1	0.460646	0	0.896491	2.05e-07	3.64364	0.000269	#ERROR!
CPA6	THAP9-AS1	0.080885	0.100281	0.776657	9.2e-05	3.64328	0.000269	0/+
BTBD11	THAP9-AS1	0.044052	0.371296	0.761404	0.000153	3.64191	0.000271	0/+
INPP5D	THAP9-AS1	0.048242	0.327491	0.763158	0.000144	3.64187	0.000271	0/+
MST1R	THAP9-AS1	0.202114	3.43e-05	0.821053	1.65e-05	3.64053	0.000272	#ERROR!
LINC01564	THAP9-AS1	0.176484	0.000308	0.812116	2.41e-05	3.63961	0.000273	#ERROR!
LGMN	THAP9-AS1	0.028216	0.566991	0.754386	0.00019	3.6395	0.000273	0/+
CTXN1	THAP9-AS1	0.142492	0.003668	-0.67018	0.001691	-3.63834	0.000274	#ERROR!
ERCC8-AS1	THAP9-AS1	0.340174	1.13e-12	0.863953	1.87e-06	3.63799	0.000275	#ERROR!
BCL2L2-PABPN1	THAP9-AS1	0.341217	9.53e-13	0.864178	1.84e-06	3.63687	0.000276	#ERROR!
MME	THAP9-AS1	-0.00261	0.957836	0.740351	0.000289	3.63579	0.000277	0/+
SAP30-DT	THAP9-AS1	0.360599	3.69e-14	-0.51975	0.022555	-3.63471	0.000278	#ERROR!
CORIN	THAP9-AS1	0.041494	0.399742	0.759438	0.000162	3.63392	0.000279	0/+
MIAT	THAP9-AS1	-0.0204	0.678902	0.7319	0.000368	3.63333	0.00028	0/+
RTP5	THAP9-AS1	-0.06644	0.177249	0.709634	0.000666	3.63245	0.000281	0/+
HSBP1L1	THAP9-AS1	0.376519	2.22e-15	0.873684	1.03e-06	3.63038	0.000283	#ERROR!
MEAK7	THAP9-AS1	0.189638	0.000104	0.815789	2.07e-05	3.62922	0.000284	#ERROR!
SDK2	THAP9-AS1	0.060769	0.217253	0.766667	0.000129	3.62621	0.000288	0/+
ERLIN1	THAP9-AS1	0.264659	4.59e-08	0.840351	6.69e-06	3.62586	0.000288	#ERROR!
C5orf52	THAP9-AS1	0.065745	0.18184	0.768554	0.000121	3.62468	0.000289	0/+
ALOX5	THAP9-AS1	0.270558	2.23e-08	0.842105	6.13e-06	3.62452	0.00029	#ERROR!
C1RL-AS1	THAP9-AS1	0.371795	5.11e-15	0.87193	1.15e-06	3.62325	0.000291	#ERROR!
MIR7854	THAP9-AS1	0.000159	0.997428	0.739983	0.000292	3.62215	0.000292	0/+
DKK1	THAP9-AS1	-0.07217	0.142674	0.705263	0.000744	3.62104	0.000293	0/+
SIGLEC10	THAP9-AS1	-0.16434	0.000789	0.654083	0.002382	3.61441	0.000301	-/+
RAB33B	THAP9-AS1	0.447782	0	-0.43509	0.062639	-3.61375	0.000302	#ERROR!
RGS12	THAP9-AS1	0.279369	7.35e-09	0.84386	5.61e-06	3.61129	0.000305	#ERROR!
KCNQ1	THAP9-AS1	0.189315	0.000106	0.814035	2.23e-05	3.61059	0.000306	#ERROR!
RAB9B	THAP9-AS1	0.156646	0.001387	-0.65789	0.0022	-3.60979	0.000306	#ERROR!
LPP	THAP9-AS1	0.21673	8.61e-06	-0.62105	0.004541	-3.60941	0.000307	#ERROR!
ERP27	THAP9-AS1	0.175048	0.000345	0.808772	2.77e-05	3.60811	0.000308	#ERROR!
FAM110C	THAP9-AS1	0.22009	6.18e-06	0.824254	1.43e-05	3.60657	0.00031	#ERROR!
CLDN23	THAP9-AS1	0.236815	1.1e-06	0.829825	1.11e-05	3.6065	0.00031	#ERROR!
CRYBG1	THAP9-AS1	0.205704	2.46e-05	0.819298	1.78e-05	3.60582	0.000311	#ERROR!
ENGASE	THAP9-AS1	0.441157	0	0.889474	3.5e-07	3.60481	0.000312	#ERROR!
CGN	THAP9-AS1	0.376089	2.22e-15	0.87193	1.15e-06	3.60422	0.000313	#ERROR!
GPR132	THAP9-AS1	-0.06769	0.169235	0.705263	0.000744	3.60388	0.000314	0/+
ARHGEF28	THAP9-AS1	0.298291	5.92e-10	0.849123	4.27e-06	3.60338	0.000314	#ERROR!
MZF1	THAP9-AS1	0.541457	0	0.914035	4.5e-08	3.60316	0.000314	#ERROR!
CBR3-AS1	THAP9-AS1	0.339582	1.24e-12	0.861404	2.17e-06	3.60255	0.000315	#ERROR!
IFI30	THAP9-AS1	-0.05683	0.248601	0.710526	0.000651	3.60254	0.000315	0/+
PAWR	THAP9-AS1	0.383724	4.44e-16	-0.49298	0.031982	-3.59978	0.000318	#ERROR!
L3MBTL4	THAP9-AS1	0.097963	0.04637	0.778947	8.5e-05	3.59977	0.000318	#ERROR!
IFNGR1	THAP9-AS1	0.172545	0.000421	0.807018	2.97e-05	3.5987	0.00032	#ERROR!
PRCP	THAP9-AS1	0.068198	0.16604	0.766667	0.000129	3.59777	0.000321	0/+
CD4	THAP9-AS1	-0.11929	0.015158	0.677193	0.001448	3.59735	0.000321	-/+
PCNX3	THAP9-AS1	0.323848	1.46e-11	0.85614	2.92e-06	3.59351	0.000326	#ERROR!
FNBP1	THAP9-AS1	0.127686	0.0093	-0.67193	0.001627	-3.59302	0.000327	#ERROR!
LINC02313	THAP9-AS1	0.175768	0.000326	0.807656	2.9e-05	3.59301	0.000327	#ERROR!
PIGH	THAP9-AS1	0.328538	7.09e-12	0.857394	2.72e-06	3.59147	0.000329	#ERROR!
CH507-42P11.6	THAP9-AS1	0.314112	6.23e-11	0.852974	3.47e-06	3.59008	0.000331	#ERROR!
MKNK1	THAP9-AS1	0.417806	0	0.882456	5.76e-07	3.58955	0.000331	#ERROR!
OAS2	THAP9-AS1	0.00954	0.84655	0.740351	0.000289	3.5895	0.000331	0/+
PTK7	THAP9-AS1	0.066641	0.175941	0.764912	0.000136	3.58757	0.000334	0/+
LOC101927787	THAP9-AS1	-0.00877	0.858752	0.731575	0.000371	3.58632	0.000335	0/+
MCCC1	THAP9-AS1	0.458673	0	0.892982	2.69e-07	3.58612	0.000336	#ERROR!
C16orf74	THAP9-AS1	0.133307	0.006601	0.791228	5.47e-05	3.58526	0.000337	#ERROR!
SMC2-AS1	THAP9-AS1	0.239135	8.54e-07	-0.60228	0.006356	-3.58516	0.000337	#ERROR!
FBXO30	THAP9-AS1	0.262467	5.97e-08	-0.58596	0.008379	-3.58393	0.000338	#ERROR!
PHKA2	THAP9-AS1	0.414142	0	0.881088	6.32e-07	3.583	0.00034	#ERROR!
LRRC37A17P	THAP9-AS1	0.29123	1.55e-09	-0.56491	0.01173	-3.58269	0.00034	#ERROR!
NOXA1	THAP9-AS1	0.33274	3.68e-12	0.857895	2.65e-06	3.58071	0.000343	#ERROR!
CDC42EP5	THAP9-AS1	0.098838	0.044443	0.777193	9.04e-05	3.57946	0.000344	#ERROR!
RHBDF1	THAP9-AS1	0.276649	1.04e-08	0.840351	6.69e-06	3.57654	0.000348	#ERROR!
B4GALNT3	THAP9-AS1	0.03663	0.457291	0.750877	0.000212	3.57654	0.000348	0/+
NSG1	THAP9-AS1	0.193214	7.6e-05	0.812281	2.39e-05	3.57543	0.00035	#ERROR!
MBP	THAP9-AS1	0.244815	4.58e-07	0.829825	1.11e-05	3.57413	0.000351	#ERROR!
LINC01979	THAP9-AS1	0.21364	1.16e-05	0.819186	1.79e-05	3.57287	0.000353	#ERROR!
KBTBD11	THAP9-AS1	0.034772	0.480444	0.749452	0.000221	3.5712	0.000355	0/+
SIPA1L3	THAP9-AS1	0.323346	1.57e-11	0.854386	3.22e-06	3.57074	0.000356	#ERROR!
PCP4L1	THAP9-AS1	0.160948	0.001015	0.8	3.92e-05	3.56867	0.000359	#ERROR!
DISP1	THAP9-AS1	0.285243	3.43e-09	-0.56667	0.011415	-3.56763	0.00036	#ERROR!
PPP1R12C	THAP9-AS1	0.399714	0	-0.47193	0.041347	-3.56717	0.000361	#ERROR!
SAP30	THAP9-AS1	0.189126	0.000108	-0.63158	0.003726	-3.56569	0.000363	#ERROR!
LINC02541	THAP9-AS1	0.29157	1.48e-09	0.84423	5.5e-06	3.56556	0.000363	#ERROR!
MECOM	THAP9-AS1	0.313141	7.18e-11	0.850877	3.89e-06	3.56504	0.000364	#ERROR!
CTAGE4	THAP9-AS1	0.146127	0.00288	0.794021	4.93e-05	3.56406	0.000365	#ERROR!
MAP7	THAP9-AS1	0.372764	4.44e-15	0.868421	1.43e-06	3.56387	0.000365	#ERROR!
KPNA7	THAP9-AS1	0.055511	0.259771	0.757506	0.000173	3.56302	0.000367	0/+
PTGR2	THAP9-AS1	0.3491	2.61e-13	0.861404	2.17e-06	3.56139	0.000369	#ERROR!
PRSS22	THAP9-AS1	0.195377	6.28e-05	0.81176	2.45e-05	3.56103	0.000369	#ERROR!
ANK3	THAP9-AS1	0.248155	3.15e-07	0.829825	1.11e-05	3.56057	0.00037	#ERROR!
BTF3	THAP9-AS1	0.269808	2.45e-08	0.836842	7.95e-06	3.55965	0.000371	#ERROR!
CYP2D8P	THAP9-AS1	0.420141	0	0.88127	6.24e-07	3.55841	0.000373	#ERROR!
DNAH1	THAP9-AS1	0.361966	2.93e-14	0.864912	1.77e-06	3.55771	0.000374	#ERROR!
GTF2A1L	THAP9-AS1	-0.0052	0.915978	-0.73427	0.000344	-3.55526	0.000378	0/-
LOC102724323	THAP9-AS1	0.379356	1.33e-15	0.869724	1.32e-06	3.5549	0.000378	#ERROR!
PHLDA1	THAP9-AS1	-0.05137	0.297072	0.707018	0.000712	3.55479	0.000378	0/+
DEFB1	THAP9-AS1	-0.02638	0.592564	0.719298	0.000518	3.55464	0.000378	0/+
LOC112268269	THAP9-AS1	0.362872	2.49e-14	0.864912	1.77e-06	3.55373	0.00038	#ERROR!
MYBPC3	THAP9-AS1	0.031173	0.527047	0.745655	0.000248	3.55213	0.000382	0/+
HMGB3P22	THAP9-AS1	0.204212	2.83e-05	-0.61984	0.004644	-3.55198	0.000382	#ERROR!
ENOSF1	THAP9-AS1	0.536177	0	0.910526	6.25e-08	3.55178	0.000383	#ERROR!
IRAG2	THAP9-AS1	0.256005	1.28e-07	0.831579	1.02e-05	3.5502	0.000385	#ERROR!
CAPN10-DT	THAP9-AS1	0.435934	0	0.884987	4.83e-07	3.5491	0.000387	#ERROR!
GMFG	THAP9-AS1	-0.09042	0.066055	0.685965	0.001185	3.54852	0.000387	0/+
SLC9A1	THAP9-AS1	0.322806	1.71e-11	0.852632	3.54e-06	3.54841	0.000388	#ERROR!
PGGHG	THAP9-AS1	0.225339	3.64e-06	0.821053	1.65e-05	3.54776	0.000389	#ERROR!
GDA	THAP9-AS1	0.215762	9.46e-06	0.817629	1.91e-05	3.54643	0.00039	#ERROR!
PLEKHA7	THAP9-AS1	0.395532	0	0.873684	1.03e-06	3.54521	0.000392	#ERROR!
RBM47	THAP9-AS1	0.377223	1.78e-15	0.868421	1.43e-06	3.54409	0.000394	#ERROR!
PILRB	THAP9-AS1	0.417693	0	0.879719	6.93e-07	3.54344	0.000395	#ERROR!
KIAA1217	THAP9-AS1	0.341429	9.21e-13	0.857895	2.65e-06	3.54334	0.000395	#ERROR!
HR	THAP9-AS1	0.104303	0.03387	0.775439	9.6e-05	3.54158	0.000398	#ERROR!
EFNB3	THAP9-AS1	0.108758	0.026913	0.777193	9.04e-05	3.54123	0.000398	#ERROR!
CD58	THAP9-AS1	0.220888	5.71e-06	0.81878	1.82e-05	3.53918	0.000401	#ERROR!
IGFBPL1	THAP9-AS1	-0.02196	0.655936	-0.73999	0.000292	-3.53914	0.000401	0/-
MYO1F	THAP9-AS1	-0.15834	0.001227	0.645614	0.00283	3.53505	0.000408	-/+
SDCBP2	THAP9-AS1	0.209039	1.8e-05	0.814035	2.23e-05	3.5323	0.000412	#ERROR!
LINC02323	THAP9-AS1	-0.01814	0.71281	0.720319	0.000504	3.53132	0.000413	0/+
GYG1	THAP9-AS1	0.269063	2.68e-08	-0.57193	0.010511	-3.53051	0.000415	#ERROR!
ACER2	THAP9-AS1	0.322515	1.78e-11	0.851251	3.81e-06	3.53046	0.000415	#ERROR!
KIAA1522	THAP9-AS1	0.411398	0	0.877193	8.2e-07	3.53023	0.000415	#ERROR!
RAP1A	THAP9-AS1	0.273457	1.56e-08	-0.56842	0.011107	-3.52877	0.000417	#ERROR!
LPCAT4	THAP9-AS1	0.294258	1.03e-09	0.842105	6.13e-06	3.52634	0.000421	#ERROR!
PHLDA2	THAP9-AS1	0.094185	0.055513	0.769636	0.000117	3.52567	0.000422	0/+
ATF7-NPFF	THAP9-AS1	0.266921	3.49e-08	0.833187	9.47e-06	3.52549	0.000423	#ERROR!
ARRDC1	THAP9-AS1	0.363408	2.26e-14	0.863158	1.96e-06	3.525	0.000423	#ERROR!
LINC02516	THAP9-AS1	0.192887	7.82e-05	0.807606	2.9e-05	3.52492	0.000424	#ERROR!
MGC32805	THAP9-AS1	0.076408	0.120605	0.762122	0.000149	3.52465	0.000424	0/+
ALDOB	THAP9-AS1	0.222584	4.81e-06	-0.60318	0.006257	-3.52391	0.000425	#ERROR!
PPP1R12A	THAP9-AS1	0.288646	2.19e-09	-0.55614	0.013411	-3.52318	0.000426	#ERROR!
PDXDC2P-NPIPB14P	THAP9-AS1	0.471689	0	0.892982	2.69e-07	3.5228	0.000427	#ERROR!
OBSCN	THAP9-AS1	0.242296	6.05e-07	0.824561	1.41e-05	3.5208	0.00043	#ERROR!
LOC100422382	THAP9-AS1	0.148649	0.002427	-0.64915	0.002635	-3.5204	0.000431	#ERROR!
CPA5	THAP9-AS1	0.014679	0.765873	0.734348	0.000343	3.51976	0.000432	0/+
SH3BP1	THAP9-AS1	0.26354	5.25e-08	0.831579	1.02e-05	3.5194	0.000433	#ERROR!
MTMR1	THAP9-AS1	0.42665	0	0.880702	6.49e-07	3.51851	0.000434	#ERROR!
GGA3	THAP9-AS1	0.542617	0	0.910526	6.25e-08	3.51716	0.000436	#ERROR!
SERINC5	THAP9-AS1	0.308056	1.5e-10	0.845614	5.13e-06	3.51496	0.00044	#ERROR!
CDRT4	THAP9-AS1	0.481198	0	0.895038	2.3e-07	3.51495	0.00044	#ERROR!
MYH14	THAP9-AS1	0.208758	1.85e-05	0.812281	2.39e-05	3.51368	0.000442	#ERROR!
GID4	THAP9-AS1	0.333035	3.52e-12	-0.5193	0.022694	-3.51289	0.000443	#ERROR!
SCML4	THAP9-AS1	-0.07916	0.107774	0.686869	0.00116	3.51179	0.000445	0/+
LOC285097	THAP9-AS1	-0.01877	0.703412	0.717505	0.000543	3.5115	0.000446	0/+
CYP2W1	THAP9-AS1	0.130574	0.00781	0.782764	7.44e-05	3.51109	0.000446	#ERROR!
EZR	THAP9-AS1	0.281718	5.43e-09	0.836842	7.95e-06	3.51052	0.000447	#ERROR!
IRF6	THAP9-AS1	0.214627	1.06e-05	0.814035	2.23e-05	3.51	0.000448	#ERROR!
MUC15	THAP9-AS1	0.130498	0.007847	0.782386	7.54e-05	3.50767	0.000452	#ERROR!
SCAT8	THAP9-AS1	0.013703	0.781029	0.732309	0.000364	3.50667	0.000454	0/+
CHKB	THAP9-AS1	0.402479	0	0.87319	1.06e-06	3.50577	0.000455	#ERROR!
PSMC1P2	THAP9-AS1	0.072421	0.141283	0.758141	0.000169	3.50399	0.000458	0/+
LIPH	THAP9-AS1	0.226122	3.36e-06	0.817544	1.92e-05	3.50393	0.000458	#ERROR!
GRAMD1C	THAP9-AS1	0.455908	0	0.887719	3.97e-07	3.50264	0.000461	#ERROR!
PTPRU	THAP9-AS1	0.252049	2.02e-07	0.826316	1.3e-05	3.50218	0.000461	#ERROR!
NLGN1	THAP9-AS1	0.172843	0.000411	-0.63158	0.003726	-3.50152	0.000463	#ERROR!
E2F4	THAP9-AS1	0.339701	1.22e-12	0.854386	3.22e-06	3.50071	0.000464	#ERROR!
RPL21P16	THAP9-AS1	0.145586	0.002987	0.787533	6.27e-05	3.50015	0.000465	#ERROR!
RGS9BP	THAP9-AS1	0.141026	0.004038	-0.65057	0.00256	-3.50009	0.000465	#ERROR!
EIF4A1	THAP9-AS1	0.491427	0	0.896885	1.99e-07	3.49956	0.000466	#ERROR!
IL18	THAP9-AS1	-0.00391	0.936799	0.722807	0.000472	3.49684	0.000471	0/+
SLC37A2	THAP9-AS1	0.086191	0.079829	0.763158	0.000144	3.49654	0.000471	0/+
LY6G5B	THAP9-AS1	0.485284	0	0.89513	2.28e-07	3.49638	0.000472	#ERROR!
EDAR	THAP9-AS1	0.049396	0.316036	0.747144	0.000237	3.49538	0.000473	0/+
PODNL1	THAP9-AS1	-0.18525	0.00015	0.622807	0.004396	3.49525	0.000474	-/+
ARSD	THAP9-AS1	0.291063	1.58e-09	0.838596	7.29e-06	3.49414	0.000476	#ERROR!
PRR14L	THAP9-AS1	0.420933	0	0.877578	8e-07	3.49265	0.000478	#ERROR!
KCNH4	THAP9-AS1	0.294068	1.06e-09	0.839333	7.03e-06	3.49109	0.000481	#ERROR!
COL27A1	THAP9-AS1	0.092027	0.061377	0.764912	0.000136	3.49019	0.000483	0/+
ITGB7	THAP9-AS1	0.156496	0.001402	0.790698	5.58e-05	3.48956	0.000484	#ERROR!
C3orf70	THAP9-AS1	0.157993	0.001259	-0.6386	0.003253	-3.48816	0.000486	#ERROR!
IL9R	THAP9-AS1	0.204647	2.72e-05	0.808437	2.81e-05	3.48737	0.000488	#ERROR!
RAET1E	THAP9-AS1	0.080348	0.102565	0.759649	0.000161	3.48715	0.000488	0/+
KIAA0895L	THAP9-AS1	0.492646	0	0.896491	2.05e-07	3.48578	0.000491	#ERROR!
B3GNTL1	THAP9-AS1	0.358918	4.95e-14	0.859149	2.47e-06	3.48554	0.000491	#ERROR!
RBFOX1	THAP9-AS1	-0.04335	0.378975	0.70169	0.000813	3.48386	0.000494	0/+
CLDN3	THAP9-AS1	0.170669	0.000487	0.795435	4.67e-05	3.48272	0.000496	#ERROR!
NFYB	THAP9-AS1	0.375092	2.66e-15	-0.47719	0.038829	-3.48263	0.000497	#ERROR!
CECR2	THAP9-AS1	0.164321	0.00079	0.792982	5.13e-05	3.4823	0.000497	#ERROR!
PIGG	THAP9-AS1	0.534927	0	0.907018	8.56e-08	3.48165	0.000498	#ERROR!
KRT87P	THAP9-AS1	0.245655	4.17e-07	0.822398	1.55e-05	3.48157	0.000498	#ERROR!
MIR6784	THAP9-AS1	0.29891	5.44e-10	0.840061	6.79e-06	3.48027	0.000501	#ERROR!
CRTAM	THAP9-AS1	-0.11671	0.017516	0.661404	0.002043	3.47834	0.000505	-/+
SLC49A3	THAP9-AS1	0.078981	0.108565	0.757895	0.00017	3.47663	0.000508	0/+
EDARADD	THAP9-AS1	0.184378	0.000162	0.8	3.92e-05	3.47662	0.000508	#ERROR!
PLXNB1	THAP9-AS1	0.442147	0	0.882456	5.76e-07	3.47572	0.000509	#ERROR!
SLC16A3	THAP9-AS1	-0.01286	0.794197	0.715789	0.000568	3.47553	0.00051	0/+
MIR23A	THAP9-AS1	0.105976	0.031096	0.769096	0.000119	3.47523	0.00051	#ERROR!
ESYT3	THAP9-AS1	0.208242	1.94e-05	-0.60457	0.006108	-3.47491	0.000511	#ERROR!
LMOD3	THAP9-AS1	0.051876	0.292327	-0.69592	0.000936	-3.47343	0.000514	0/-
SCIN	THAP9-AS1	0.248874	2.91e-07	0.822807	1.52e-05	3.47331	0.000514	#ERROR!
FZD6	THAP9-AS1	0.264467	4.7e-08	0.82807	1.2e-05	3.47265	0.000515	#ERROR!
PRKAA2	THAP9-AS1	0.150511	0.002136	-0.64063	0.003125	-3.47207	0.000516	#ERROR!
RNF115	THAP9-AS1	0.372491	4.44e-15	-0.47719	0.038829	-3.47111	0.000518	#ERROR!
DOC2A	THAP9-AS1	0.285895	3.15e-09	0.835024	8.67e-06	3.47019	0.00052	#ERROR!
ARHGEF18	THAP9-AS1	0.296933	7.14e-10	0.838596	7.29e-06	3.46965	0.000521	#ERROR!
MRPL44	THAP9-AS1	0.205191	2.59e-05	0.807018	2.97e-05	3.46964	0.000521	#ERROR!
LOC100130449	THAP9-AS1	0.181576	0.000204	0.798246	4.2e-05	3.46916	0.000522	#ERROR!
MCF2L2	THAP9-AS1	0.173284	0.000397	0.795086	4.74e-05	3.46883	0.000523	#ERROR!
ANXA11	THAP9-AS1	0.166481	0.000672	0.792453	5.23e-05	3.4684	0.000524	#ERROR!
ABHD11	THAP9-AS1	0.341496	9.11e-13	0.852632	3.54e-06	3.46834	0.000524	#ERROR!
LOC101927040	THAP9-AS1	0.176605	0.000305	0.79621	4.54e-05	3.46745	0.000525	#ERROR!
MROH3P	THAP9-AS1	0.298738	5.57e-10	0.838971	7.16e-06	3.46691	0.000526	#ERROR!
CILP2	THAP9-AS1	0.060273	0.221033	0.748574	0.000227	3.46616	0.000528	0/+
DTNB	THAP9-AS1	0.266114	3.85e-08	0.82807	1.2e-05	3.4659	0.000528	#ERROR!
GGTA2P	THAP9-AS1	0.342346	7.94e-13	-0.50239	0.028372	-3.46575	0.000529	#ERROR!
SLMAP	THAP9-AS1	0.235787	1.22e-06	-0.58421	0.008625	-3.46533	0.00053	#ERROR!
NELL2	THAP9-AS1	0.034396	0.485207	0.736842	0.00032	3.46527	0.00053	0/+
HSD17B8	THAP9-AS1	0.230778	2.08e-06	0.815789	2.07e-05	3.46513	0.00053	#ERROR!
SDHAP1	THAP9-AS1	0.566597	0	0.914035	4.5e-08	3.46487	0.00053	#ERROR!
DALRD3	THAP9-AS1	0.266615	3.62e-08	0.82807	1.2e-05	3.46384	0.000533	#ERROR!
KRT23	THAP9-AS1	0.001472	0.976181	0.721053	0.000495	3.46237	0.000535	0/+
FAM13B	THAP9-AS1	0.441411	0	-0.40877	0.082266	-3.46144	0.000537	#ERROR!
CHPF	THAP9-AS1	-0.10299	0.036183	0.666667	0.001825	3.46129	0.000538	-/+
NNAT	THAP9-AS1	0.200917	3.83e-05	-0.60702	0.00585	-3.4605	0.000539	#ERROR!
P2RY2	THAP9-AS1	0.120988	0.013764	0.773684	0.000102	3.46044	0.000539	#ERROR!
ID1	THAP9-AS1	0.24708	3.56e-07	0.821053	1.65e-05	3.45999	0.00054	#ERROR!
COLCA1	THAP9-AS1	0.278132	8.61e-09	0.831579	1.02e-05	3.45938	0.000541	#ERROR!
RGL4	THAP9-AS1	0.303304	2.94e-10	0.839842	6.86e-06	3.45902	0.000542	#ERROR!
PDLIM1	THAP9-AS1	0.096145	0.050597	0.763158	0.000144	3.45828	0.000544	0/+
SLC9A7	THAP9-AS1	0.157198	0.001333	0.787719	6.23e-05	3.45672	0.000547	#ERROR!
DUSP5	THAP9-AS1	0.017844	0.717349	0.72807	0.000409	3.45627	0.000548	0/+
SDR42E1	THAP9-AS1	0.261844	6.44e-08	0.825801	1.33e-05	3.45603	0.000548	#ERROR!
LOC339192	THAP9-AS1	0.068302	0.16539	0.750877	0.000212	3.45547	0.000549	0/+
FAM221B	THAP9-AS1	0.284453	3.81e-09	0.833345	9.4e-06	3.45514	0.00055	#ERROR!
MIR200A	THAP9-AS1	0.412841	0	0.872982	1.08e-06	3.45506	0.00055	#ERROR!
HCAR1	THAP9-AS1	0.206075	2.38e-05	0.80597	3.1e-05	3.45471	0.000551	#ERROR!
PRR5L	THAP9-AS1	-0.11653	0.017694	0.657895	0.0022	3.45396	0.000552	-/+
DAPK2	THAP9-AS1	0.22865	2.59e-06	0.814035	2.23e-05	3.45379	0.000553	#ERROR!
BMP2	THAP9-AS1	0.105737	0.03148	0.766667	0.000129	3.45358	0.000553	#ERROR!
PRKCD	THAP9-AS1	0.311699	8.86e-11	0.842105	6.13e-06	3.45314	0.000554	#ERROR!
PLEKHH1	THAP9-AS1	0.391764	0	0.866667	1.59e-06	3.45202	0.000556	#ERROR!
ORMDL1	THAP9-AS1	0.54762	0	0.908772	7.32e-08	3.45127	0.000558	#ERROR!
DPEP2	THAP9-AS1	0.001104	0.982125	0.719298	0.000518	3.44988	0.000561	0/+
GATA4	THAP9-AS1	0.015111	0.759185	-0.71138	0.000637	-3.44987	0.000561	0/-
CCDC57	THAP9-AS1	0.428818	0	0.877193	8.2e-07	3.4496	0.000561	#ERROR!
KCNJ15	THAP9-AS1	0.307134	1.71e-10	0.840351	6.69e-06	3.44951	0.000562	#ERROR!
LRCH4	THAP9-AS1	0.441457	0	0.880702	6.49e-07	3.44897	0.000563	#ERROR!
FAM118A	THAP9-AS1	0.334943	2.6e-12	0.849123	4.27e-06	3.44808	0.000565	#ERROR!
SERPINB8	THAP9-AS1	0.074365	0.130882	0.752632	0.000201	3.44762	0.000566	0/+
NDST2	THAP9-AS1	0.327944	7.77e-12	0.846863	4.81e-06	3.44739	0.000566	#ERROR!
HMGXB3	THAP9-AS1	0.386867	4.44e-16	0.864912	1.77e-06	3.44731	0.000566	#ERROR!
HNF1A	THAP9-AS1	0.12156	0.01332	-0.65398	0.002387	-3.44719	0.000566	#ERROR!
PLEKHM1	THAP9-AS1	0.265783	4.01e-08	0.826316	1.3e-05	3.44607	0.000569	#ERROR!
PLA2G4F	THAP9-AS1	0.249688	2.65e-07	0.820739	1.67e-05	3.44574	0.00057	#ERROR!
LOC651337	THAP9-AS1	0.446105	0	0.88176	6.04e-07	3.44497	0.000571	#ERROR!
IFNE	THAP9-AS1	0.173873	0.000379	0.79293	5.14e-05	3.44428	0.000573	#ERROR!
LAMC2	THAP9-AS1	0.028564	0.56221	0.731579	0.000371	3.444	0.000573	0/+
AP1B1	THAP9-AS1	0.251143	2.25e-07	0.821053	1.65e-05	3.44348	0.000574	#ERROR!
PLS1	THAP9-AS1	0.341642	8.9e-13	0.850877	3.89e-06	3.44335	0.000575	#ERROR!
PUS10	THAP9-AS1	0.347703	3.3e-13	0.852632	3.54e-06	3.44149	0.000579	#ERROR!
RN7SL784P	THAP9-AS1	0.057328	0.244475	-0.68854	0.001115	-3.4403	0.000581	0/-
MIR4653	THAP9-AS1	0.347655	3.32e-13	0.852495	3.57e-06	3.43979	0.000582	#ERROR!
GPR68	THAP9-AS1	-0.17377	0.000382	0.621053	0.004541	3.43915	0.000584	-/+
RAB7B	THAP9-AS1	-0.02086	0.672195	0.707018	0.000712	3.43833	0.000585	0/+
SLC2A1	THAP9-AS1	0.184971	0.000154	0.796491	4.49e-05	3.43741	0.000587	#ERROR!
GALNT9	THAP9-AS1	0.032025	0.515815	0.73235	0.000363	3.43713	0.000588	0/+
KCNK17	THAP9-AS1	-0.02916	0.554142	0.70268	0.000793	3.43712	0.000588	0/+
CENATAC	THAP9-AS1	0.467776	0	0.887231	4.12e-07	3.43638	0.00059	#ERROR!
KCNK13	THAP9-AS1	-0.02508	0.610858	0.704488	0.000759	3.43522	0.000592	0/+
RUSC1-AS1	THAP9-AS1	0.586335	0	0.917544	3.2e-08	3.43508	0.000592	#ERROR!
RNF224	THAP9-AS1	0.224452	3.99e-06	0.810717	2.55e-05	3.43345	0.000596	#ERROR!
JAML	THAP9-AS1	-0.10467	0.033247	0.661404	0.002043	3.43185	0.000599	-/+
DENND2C	THAP9-AS1	0.150288	0.002169	0.782456	7.52e-05	3.4314	0.0006	#ERROR!
GSAP	THAP9-AS1	0.378983	1.33e-15	0.861404	2.17e-06	3.43007	0.000603	#ERROR!
ACTA1	THAP9-AS1	0.097695	0.046973	-0.66491	0.001896	-3.42886	0.000606	#ERROR!
DUSP7	THAP9-AS1	0.02505	0.611292	0.72807	0.000409	3.42879	0.000606	0/+
GKAP1	THAP9-AS1	0.378226	1.55e-15	-0.46316	0.045819	-3.42787	0.000608	#ERROR!
PRDX5	THAP9-AS1	0.172492	0.000423	0.790698	5.58e-05	3.4269	0.000611	#ERROR!
DOCK6	THAP9-AS1	0.323478	1.54e-11	0.84386	5.61e-06	3.42631	0.000612	#ERROR!
LCN12	THAP9-AS1	0.334919	2.61e-12	0.847455	4.66e-06	3.42551	0.000614	#ERROR!
PLBD1	THAP9-AS1	0.221172	5.55e-06	0.808772	2.77e-05	3.42508	0.000615	#ERROR!
AGPAT2	THAP9-AS1	0.13014	0.00802	0.773684	0.000102	3.425	0.000615	#ERROR!
PLCD3	THAP9-AS1	0.152223	0.001896	0.782456	7.52e-05	3.42385	0.000617	#ERROR!
LINC01213	THAP9-AS1	0.238499	9.15e-07	0.814826	2.15e-05	3.42303	0.000619	#ERROR!
JAG1	THAP9-AS1	0.038118	0.439217	0.733333	0.000353	3.42197	0.000622	0/+
PTGER2	THAP9-AS1	-0.1151	0.019149	0.653796	0.002396	3.42101	0.000624	-/+
FAXC	THAP9-AS1	0.043692	0.375218	-0.69298	0.001004	-3.42055	0.000625	0/-
CHRNA7	THAP9-AS1	0.119801	0.014728	0.768758	0.00012	3.4187	0.000629	#ERROR!
KCNH3	THAP9-AS1	0.061165	0.214266	0.743411	0.000265	3.41837	0.00063	0/+
CCR5	THAP9-AS1	-0.15127	0.002027	0.631579	0.003726	3.41706	0.000633	-/+
CSF3R	THAP9-AS1	-0.03588	0.466554	0.696491	0.000923	3.41658	0.000634	0/+
PSEN1	THAP9-AS1	0.304634	2.44e-10	0.836842	7.95e-06	3.41495	0.000638	#ERROR!
PSMB10	THAP9-AS1	0.09507	0.053245	0.757895	0.00017	3.41483	0.000638	0/+
ADGRE1	THAP9-AS1	-0.14202	0.003785	0.636803	0.003369	3.41433	0.000639	-/+
RN7SL600P	THAP9-AS1	0.099399	0.043241	0.759688	0.000161	3.41428	0.000639	#ERROR!
BAIAP2	THAP9-AS1	0.01062	0.829419	0.719298	0.000518	3.4136	0.000641	0/+
NME4	THAP9-AS1	0.263775	5.11e-08	-0.55439	0.013769	-3.41087	0.000648	#ERROR!
PTGDR	THAP9-AS1	-0.17159	0.000453	0.617815	0.004819	3.41055	0.000648	-/+
NECTIN1	THAP9-AS1	0.164565	0.000776	0.785965	6.63e-05	3.41034	0.000649	#ERROR!
LMO7	THAP9-AS1	0.164682	0.000769	0.785965	6.63e-05	3.40988	0.00065	#ERROR!
LNCTAM34A	THAP9-AS1	0.264501	4.68e-08	0.822807	1.52e-05	3.40955	0.000651	#ERROR!
CCL4	THAP9-AS1	-0.13781	0.004969	0.638596	0.003253	3.40951	0.000651	-/+
FAM174B	THAP9-AS1	0.245399	4.29e-07	0.815789	2.07e-05	3.40605	0.000659	#ERROR!
CYP2C8	THAP9-AS1	0.274409	1.38e-08	0.82586	1.33e-05	3.40514	0.000661	#ERROR!
RNF149	THAP9-AS1	0.29643	7.65e-10	0.833333	9.4e-06	3.40513	0.000661	#ERROR!
IL1A	THAP9-AS1	0.074268	0.13139	0.747696	0.000233	3.40498	0.000662	0/+
RPF2P1	THAP9-AS1	0.113409	0.020999	0.764475	0.000138	3.4038	0.000665	#ERROR!
FAM102A	THAP9-AS1	0.246118	3.96e-07	0.815789	2.07e-05	3.40313	0.000666	#ERROR!
CCDC183-AS1	THAP9-AS1	0.437132	0	0.8767	8.47e-07	3.40247	0.000668	#ERROR!
INO80C	THAP9-AS1	0.27151	1.98e-08	0.824561	1.41e-05	3.40156	0.00067	#ERROR!
PNPLA1	THAP9-AS1	0.087829	0.074244	0.753251	0.000197	3.40142	0.00067	0/+
LOC101928335	THAP9-AS1	0.111449	0.023338	0.763342	0.000143	3.401	0.000671	#ERROR!
KCTD14	THAP9-AS1	0.055142	0.262959	0.738596	0.000304	3.40071	0.000672	0/+
EED	THAP9-AS1	0.439381	0	0.877193	8.2e-07	3.39998	0.000674	#ERROR!
CPAMD8	THAP9-AS1	0.227506	2.92e-06	0.808772	2.77e-05	3.39966	0.000675	#ERROR!
RASSF10-DT	THAP9-AS1	0.181342	0.000208	0.791371	5.44e-05	3.39893	0.000676	#ERROR!
BVES	THAP9-AS1	-0.01455	0.767835	-0.7193	0.000518	-3.39861	0.000677	0/-
RBM38	THAP9-AS1	0.168681	0.000568	-0.61754	0.004843	-3.39746	0.00068	#ERROR!
LOC654780	THAP9-AS1	0.213506	1.18e-05	0.803404	3.43e-05	3.39733	0.00068	#ERROR!
SGPL1	THAP9-AS1	0.33577	2.28e-12	0.845614	5.13e-06	3.3971	0.000681	#ERROR!
MET	THAP9-AS1	0.091636	0.062491	0.754386	0.00019	3.39681	0.000682	0/+
PMS2CL	THAP9-AS1	0.456919	0	0.881966	5.95e-07	3.39672	0.000682	#ERROR!
PPP4R1	THAP9-AS1	0.257851	1.03e-07	0.819298	1.78e-05	3.39571	0.000685	#ERROR!
CD8A	THAP9-AS1	-0.05382	0.274575	0.684211	0.001234	3.39566	0.000685	0/+
GPHA2	THAP9-AS1	0.073468	0.135606	0.746247	0.000243	3.39554	0.000685	0/+
SLC8A2	THAP9-AS1	0.16263	0.000896	-0.62105	0.004541	-3.39544	0.000685	#ERROR!
RSPO1	THAP9-AS1	-0.10226	0.037536	0.657306	0.002227	3.39495	0.000686	-/+
CACNA1C-IT2	THAP9-AS1	-0.09814	0.045984	-0.75686	0.000176	-3.39383	0.000689	-/-
GBP6	THAP9-AS1	0.014927	0.762029	0.718736	0.000526	3.39275	0.000692	0/+
GSTO2	THAP9-AS1	0.346356	4.12e-13	0.848618	4.38e-06	3.39198	0.000694	#ERROR!
LOC101927793	THAP9-AS1	0.04579	0.352707	0.733189	0.000355	3.39149	0.000695	0/+
KCNJ11	THAP9-AS1	0.274867	1.3e-08	-0.54234	0.01644	-3.39081	0.000697	#ERROR!
RAP1GAP	THAP9-AS1	0.239051	8.62e-07	0.811952	2.43e-05	3.38843	0.000703	#ERROR!
HS3ST4	THAP9-AS1	-0.0159	0.747037	0.702832	0.00079	3.38771	0.000705	0/+
PICART1	THAP9-AS1	0.151032	0.00206	0.778218	8.72e-05	3.38719	0.000706	#ERROR!
IL1B	THAP9-AS1	-0.02787	0.571693	0.696491	0.000923	3.38603	0.000709	0/+
CCDC187	THAP9-AS1	0.216552	8.76e-06	0.803404	3.43e-05	3.38515	0.000711	#ERROR!
SLC27A2	THAP9-AS1	0.23716	1.06e-06	0.810882	2.54e-05	3.38413	0.000714	#ERROR!
BAIAP2L1	THAP9-AS1	0.344362	5.71e-13	0.847368	4.68e-06	3.38366	0.000715	#ERROR!
MIR486-1	THAP9-AS1	-0.0203	0.68043	0.699855	0.000851	3.38216	0.000719	0/+
NPFFR1	THAP9-AS1	-0.00406	0.934413	0.708006	0.000694	3.38182	0.00072	0/+
C11orf87	THAP9-AS1	-0.17516	0.000342	0.61065	0.005485	3.38073	0.000723	-/+
ACSF2	THAP9-AS1	0.297205	6.88e-10	0.831579	1.02e-05	3.38011	0.000725	#ERROR!
HDAC10	THAP9-AS1	0.356233	7.86e-14	0.850877	3.89e-06	3.38002	0.000725	#ERROR!
ERMN	THAP9-AS1	-0.05236	0.2878	0.682778	0.001275	3.37984	0.000725	0/+
ATP2C2	THAP9-AS1	0.181996	0.000197	0.789474	5.84e-05	3.37708	0.000733	#ERROR!
PDE3B	THAP9-AS1	0.206111	2.37e-05	-0.58947	0.007905	-3.377	0.000733	#ERROR!
ARHGEF2-AS1	THAP9-AS1	0.276769	1.02e-08	0.824312	1.42e-05	3.37692	0.000733	#ERROR!
IDO1	THAP9-AS1	-0.10828	0.027592	0.650877	0.002544	3.37533	0.000737	-/+
ABAT	THAP9-AS1	0.25315	1.78e-07	0.815789	2.07e-05	3.37455	0.000739	#ERROR!
IL1RN	THAP9-AS1	0.147471	0.00263	0.775439	9.6e-05	3.37435	0.00074	#ERROR!
LOC100288175	THAP9-AS1	0.332802	3.65e-12	0.842845	5.9e-06	3.37309	0.000743	#ERROR!
KRT86	THAP9-AS1	0.104402	0.0337	0.757137	0.000175	3.37213	0.000746	#ERROR!
FAM169A	THAP9-AS1	0.234397	1.42e-06	0.808772	2.77e-05	3.37191	0.000746	#ERROR!
CBFA2T3	THAP9-AS1	0.000409	0.993376	0.708772	0.000681	3.37066	0.00075	0/+
PHKG1	THAP9-AS1	0.242352	6.01e-07	-0.56277	0.012123	-3.3701	0.000751	#ERROR!
ANKFN1	THAP9-AS1	0.196126	5.88e-05	0.794208	4.9e-05	3.36961	0.000753	#ERROR!
SLC44A3	THAP9-AS1	0.342433	7.83e-13	0.845614	5.13e-06	3.3684	0.000756	#ERROR!
IL7R	THAP9-AS1	-0.16947	0.000534	0.612281	0.005327	3.3683	0.000756	-/+
FLJ22447	THAP9-AS1	-0.03921	0.426215	0.68805	0.001128	3.3675	0.000759	0/+
PLD1	THAP9-AS1	0.136531	0.005392	0.770175	0.000115	3.3671	0.00076	#ERROR!
CTSS	THAP9-AS1	0.128375	0.008923	0.766667	0.000129	3.36609	0.000762	#ERROR!
EPSTI1	THAP9-AS1	-0.06232	0.205714	0.675439	0.001506	3.366	0.000763	0/+
C3orf52	THAP9-AS1	0.316245	4.55e-11	0.836842	7.95e-06	3.36597	0.000763	#ERROR!
SLC12A3	THAP9-AS1	0.015234	0.75728	0.715392	0.000574	3.36534	0.000765	0/+
AKNA	THAP9-AS1	0.217263	8.17e-06	0.801754	3.66e-05	3.36464	0.000766	#ERROR!
LIPM	THAP9-AS1	0.154815	0.00158	0.777369	8.98e-05	3.36423	0.000768	#ERROR!
PROM2	THAP9-AS1	0.185379	0.000149	0.789474	5.84e-05	3.36374	0.000769	#ERROR!
FGD3	THAP9-AS1	0.146066	0.002892	0.773684	0.000102	3.36312	0.000771	#ERROR!
CC2D1B	THAP9-AS1	0.429118	0	0.87193	1.15e-06	3.36287	0.000771	#ERROR!
NEIL1	THAP9-AS1	0.441179	0	0.875439	9.19e-07	3.36267	0.000772	#ERROR!
BMP7	THAP9-AS1	0.155464	0.001509	0.777193	9.04e-05	3.36001	0.000779	#ERROR!
FDXACB1	THAP9-AS1	0.304186	2.6e-10	0.832309	9.87e-06	3.3599	0.00078	#ERROR!
CCDC50	THAP9-AS1	0.287638	2.5e-09	-0.52632	0.020619	-3.35817	0.000785	#ERROR!
ABO	THAP9-AS1	0.252432	1.94e-07	0.814035	2.23e-05	3.35756	0.000786	#ERROR!
SLC10A3	THAP9-AS1	0.196096	5.9e-05	0.792982	5.13e-05	3.35711	0.000788	#ERROR!
GPBP1	THAP9-AS1	0.49199	0	0.889474	3.5e-07	3.35699	0.000788	#ERROR!
OAS3	THAP9-AS1	0.135123	0.005893	0.768421	0.000121	3.35619	0.00079	#ERROR!
CELA2B	THAP9-AS1	0.373907	3.55e-15	0.854634	3.17e-06	3.35478	0.000794	#ERROR!
ACSM1	THAP9-AS1	0.227951	2.79e-06	0.804739	3.26e-05	3.35384	0.000797	#ERROR!
PITPNM1	THAP9-AS1	0.244801	4.59e-07	0.810526	2.58e-05	3.34925	0.00081	#ERROR!
LMF2	THAP9-AS1	0.171363	0.000462	0.782456	7.52e-05	3.34893	0.000811	#ERROR!
CYP4F32P	THAP9-AS1	0.196966	5.46e-05	0.792349	5.25e-05	3.34716	0.000816	#ERROR!
DOCK5	THAP9-AS1	0.203247	3.09e-05	0.794737	4.8e-05	3.3468	0.000817	#ERROR!
ALOX12P2	THAP9-AS1	0.272574	1.74e-08	0.820222	1.71e-05	3.34607	0.00082	#ERROR!
ADAD2	THAP9-AS1	0.176051	0.000319	0.784021	7.11e-05	3.34594	0.00082	#ERROR!
AGBL2	THAP9-AS1	0.390739	0	0.859149	2.47e-06	3.3444	0.000825	#ERROR!
C22orf39	THAP9-AS1	0.272794	1.69e-08	-0.53509	0.018239	-3.34331	0.000828	#ERROR!
CAMK2G	THAP9-AS1	0.3344	2.84e-12	-0.48421	0.035659	-3.33994	0.000838	#ERROR!
FOXA2	THAP9-AS1	0.028987	0.556434	0.718721	0.000526	3.33901	0.000841	0/+
CAMK1D	THAP9-AS1	0.178578	0.00026	0.784211	7.06e-05	3.33787	0.000844	#ERROR!
LOC644135	THAP9-AS1	0.166184	0.000687	0.779171	8.44e-05	3.33718	0.000846	#ERROR!
PLBD1-AS1	THAP9-AS1	0.252477	1.93e-07	0.812116	2.41e-05	3.3358	0.000851	#ERROR!
PSME2P2	THAP9-AS1	0.061659	0.210578	0.733333	0.000353	3.33201	0.000862	0/+
ANKRD18B	THAP9-AS1	0.222654	4.78e-06	0.800703	3.82e-05	3.33185	0.000863	#ERROR!
RIMBP2	THAP9-AS1	-0.10838	0.027452	0.644142	0.002915	3.3315	0.000864	-/+
RNU4-23P	THAP9-AS1	0.236881	1.09e-06	0.805988	3.1e-05	3.3314	0.000864	#ERROR!
ITGB1BP2	THAP9-AS1	0.201454	3.64e-05	-0.58472	0.008552	-3.33085	0.000866	#ERROR!
DSP	THAP9-AS1	0.100807	0.040351	0.750877	0.000212	3.33068	0.000866	#ERROR!
LINC00892	THAP9-AS1	-0.01952	0.692025	0.693287	0.000997	3.33057	0.000867	0/+
LOC105371267	THAP9-AS1	0.054536	0.268246	0.729825	0.00039	3.33048	0.000867	0/+
MX1	THAP9-AS1	0.058307	0.236492	0.731579	0.000371	3.33041	0.000867	0/+
CASR	THAP9-AS1	0.12949	0.008343	0.763203	0.000144	3.32994	0.000869	#ERROR!
RSKR	THAP9-AS1	0.454203	0	0.877193	8.2e-07	3.32939	0.00087	#ERROR!
LRP5L	THAP9-AS1	0.442237	0	0.873684	1.03e-06	3.32922	0.000871	#ERROR!
SH3BP2	THAP9-AS1	0.395755	0	0.859649	2.4e-06	3.32908	0.000871	#ERROR!
EIF2AK3	THAP9-AS1	0.390149	2.22e-16	0.857895	2.65e-06	3.32888	0.000872	#ERROR!
REEP6	THAP9-AS1	0.203376	3.06e-05	0.792982	5.13e-05	3.3282	0.000874	#ERROR!
EHD4	THAP9-AS1	0.221996	5.11e-06	0.8	3.92e-05	3.32703	0.000878	#ERROR!
IFNG	THAP9-AS1	-0.0908	0.064923	0.653738	0.002399	3.32702	0.000878	0/+
ARHGAP9	THAP9-AS1	-0.12181	0.013128	0.635088	0.003483	3.32498	0.000884	-/+
NR2E3	THAP9-AS1	0.270015	2.39e-08	0.817472	1.92e-05	3.32479	0.000885	#ERROR!
SLC25A23	THAP9-AS1	0.160756	0.001029	-0.61053	0.005497	-3.32347	0.000889	#ERROR!
PRXL2A	THAP9-AS1	0.251291	2.21e-07	0.810526	2.58e-05	3.32289	0.000891	#ERROR!
AVPI1	THAP9-AS1	0.041764	0.396673	0.722807	0.000472	3.32266	0.000892	0/+
LINC00589	THAP9-AS1	0.114086	0.02024	0.755701	0.000183	3.32197	0.000894	#ERROR!
RAET1G	THAP9-AS1	0.066928	0.174088	0.734533	0.000342	3.32176	0.000895	0/+
FRMD4B	THAP9-AS1	0.076013	0.122541	0.738596	0.000304	3.32081	0.000898	0/+
CCDC158	THAP9-AS1	0.249522	2.7e-07	-0.54849	0.01503	-3.3204	0.000899	#ERROR!
APOBEC3A	THAP9-AS1	0.027857	0.571932	0.715789	0.000568	3.32031	0.000899	0/+
SLC30A1	THAP9-AS1	0.187464	0.000125	0.785965	6.63e-05	3.32026	0.000899	#ERROR!
FAM83B	THAP9-AS1	0.24752	3.38e-07	0.808818	2.76e-05	3.31932	0.000902	#ERROR!
SCNN1A	THAP9-AS1	0.128604	0.008801	0.761404	0.000153	3.317	0.00091	#ERROR!
IFNLR1	THAP9-AS1	0.329171	6.43e-12	0.837209	7.81e-06	3.31565	0.000914	#ERROR!
SLC4A11	THAP9-AS1	0.233533	1.56e-06	0.803165	3.47e-05	3.3144	0.000918	#ERROR!
COL19A1	THAP9-AS1	0.016888	0.731892	-0.69241	0.001018	-3.31408	0.000919	0/-
GDF11	THAP9-AS1	0.244708	4.63e-07	-0.55088	0.014508	-3.31392	0.00092	#ERROR!
PPFIBP2	THAP9-AS1	0.399125	0	0.859649	2.4e-06	3.31382	0.00092	#ERROR!
MMP28	THAP9-AS1	0.105553	0.031778	0.750877	0.000212	3.31239	0.000925	#ERROR!
PATE2	THAP9-AS1	0.091266	0.063561	-0.65114	0.002531	-3.31154	0.000928	0/-
SLA2	THAP9-AS1	-0.08231	0.094417	0.65614	0.002282	3.31044	0.000932	0/+
CLDN7	THAP9-AS1	0.283591	4.26e-09	0.821053	1.65e-05	3.31026	0.000932	#ERROR!
RNF38	THAP9-AS1	0.347484	3.42e-13	-0.46667	0.043988	-3.30997	0.000933	#ERROR!
CBY3	THAP9-AS1	0.317845	3.59e-11	-0.49227	0.03227	-3.30965	0.000934	#ERROR!
SCN1A-AS1	THAP9-AS1	0.092862	0.059048	0.744838	0.000254	3.30901	0.000936	0/+
RHOT2	THAP9-AS1	0.440698	0	0.87193	1.15e-06	3.30843	0.000938	#ERROR!
CAPN13	THAP9-AS1	0.176984	0.000296	0.780562	8.04e-05	3.30828	0.000939	#ERROR!
NRTN	THAP9-AS1	0.063498	0.197263	-0.66637	0.001837	-3.30767	0.000941	0/-
MAMDC4	THAP9-AS1	0.365946	1.47e-14	0.848618	4.38e-06	3.30646	0.000945	#ERROR!
KRT17	THAP9-AS1	-0.10197	0.038081	0.64386	0.002931	3.30497	0.00095	-/+
RPH3AL	THAP9-AS1	0.246248	3.9e-07	0.807018	2.97e-05	3.30472	0.000951	#ERROR!
DIAPH2-AS1	THAP9-AS1	0.214843	1.03e-05	0.795078	4.74e-05	3.30411	0.000953	#ERROR!
MMP14	THAP9-AS1	-0.13036	0.007914	0.626316	0.004117	3.30255	0.000958	-/+
ANXA8	THAP9-AS1	0.087297	0.076021	0.741553	0.000279	3.30243	0.000959	0/+
LOC101928731	THAP9-AS1	-0.02902	0.555937	-0.71404	0.000595	-3.30218	0.000959	0/-
FAM184A	THAP9-AS1	0.219833	6.34e-06	-0.56667	0.011415	-3.3012	0.000963	#ERROR!
ELMO3	THAP9-AS1	0.266332	3.75e-08	0.814035	2.23e-05	3.30076	0.000964	#ERROR!
KCNS1	THAP9-AS1	0.060234	0.221333	0.728793	0.000401	3.30029	0.000966	0/+
KHDRBS2	THAP9-AS1	0.01724	0.726521	0.70795	0.000695	3.30021	0.000966	0/+
C11orf45	THAP9-AS1	0.125063	0.010866	0.757895	0.00017	3.2991	0.00097	#ERROR!
DIS3L2	THAP9-AS1	0.296346	7.74e-10	0.824561	1.41e-05	3.29859	0.000972	#ERROR!
GAD1	THAP9-AS1	0.2806	6.28e-09	0.818982	1.8e-05	3.29855	0.000972	#ERROR!
SFXN2	THAP9-AS1	0.353286	1.29e-13	0.84386	5.61e-06	3.29799	0.000974	#ERROR!
PEMT	THAP9-AS1	0.271889	1.89e-08	0.815789	2.07e-05	3.29783	0.000974	#ERROR!
CDCP1	THAP9-AS1	0.101511	0.038968	0.747368	0.000235	3.29749	0.000976	#ERROR!
GNAQ	THAP9-AS1	0.251863	2.07e-07	-0.54234	0.01644	-3.29659	0.000979	#ERROR!
PRKCQ-AS1	THAP9-AS1	-0.00671	0.891786	0.695042	0.000956	3.29461	0.000986	0/+
MFSD14B	THAP9-AS1	0.253485	1.72e-07	0.808772	2.77e-05	3.29455	0.000986	#ERROR!
C1orf116	THAP9-AS1	0.244292	4.85e-07	0.805263	3.19e-05	3.29355	0.000989	#ERROR!
ROCK2	THAP9-AS1	0.287257	2.63e-09	-0.51404	0.024356	-3.29241	0.000993	#ERROR!
PGAP4	THAP9-AS1	0.06085	0.216635	0.72807	0.000409	3.29206	0.000995	0/+
GLOD5	THAP9-AS1	0.255962	1.29e-07	0.809426	2.69e-05	3.29167	0.000996	#ERROR!
SCHLAP1	THAP9-AS1	0.111128	0.023741	0.750882	0.000212	3.29093	0.000999	#ERROR!
ANO9	THAP9-AS1	0.402754	0	0.859149	2.47e-06	3.29005	0.001002	#ERROR!
NUTM2G	THAP9-AS1	0.360547	3.73e-14	0.845583	5.13e-06	3.2892	0.001005	#ERROR!
BAIAP2L2	THAP9-AS1	0.199777	4.24e-05	0.787719	6.23e-05	3.28905	0.001005	#ERROR!
EVPLL	THAP9-AS1	0.317109	4e-11	0.830766	1.06e-05	3.28632	0.001015	#ERROR!
MMD	THAP9-AS1	-0.00196	0.968354	-0.69825	0.000885	-3.28532	0.001019	0/-
LOC100505664	THAP9-AS1	0.100415	0.041139	0.745391	0.00025	3.28469	0.001021	#ERROR!
DACH2	THAP9-AS1	0.275685	1.18e-08	0.815987	2.05e-05	3.28444	0.001022	#ERROR!
SH3TC2	THAP9-AS1	0.214496	1.07e-05	0.792982	5.13e-05	3.28389	0.001024	#ERROR!
SH3BGR	THAP9-AS1	0.222626	4.79e-06	-0.5614	0.01238	-3.28297	0.001027	#ERROR!
LINC01503	THAP9-AS1	0.13203	0.007143	0.759105	0.000164	3.28296	0.001027	#ERROR!
ILVBL	THAP9-AS1	0.285349	3.38e-09	0.819298	1.78e-05	3.28254	0.001029	#ERROR!
ARRDC5	THAP9-AS1	-0.05607	0.254958	0.666669	0.001825	3.28129	0.001033	0/+
MROH1	THAP9-AS1	0.423296	0	0.864912	1.77e-06	3.28116	0.001034	#ERROR!
PARVG	THAP9-AS1	-0.16877	0.000564	0.598246	0.006815	3.28111	0.001034	-/+
CRIP1	THAP9-AS1	0.010184	0.836321	0.701754	0.000812	3.28018	0.001037	0/+
LRRC9	THAP9-AS1	0.210503	1.57e-05	0.791024	5.51e-05	3.2798	0.001039	#ERROR!
NRIP3	THAP9-AS1	0.184081	0.000166	-0.58772	0.008139	-3.27947	0.00104	#ERROR!
LOC400499	THAP9-AS1	0.252591	1.9e-07	0.807018	2.97e-05	3.27893	0.001042	#ERROR!
DUSP9	THAP9-AS1	0.08261	0.093218	0.736571	0.000322	3.27857	0.001043	0/+
MIRLET7D	THAP9-AS1	0.247673	3.33e-07	0.805107	3.21e-05	3.27814	0.001045	#ERROR!
LINC01873	THAP9-AS1	0.292177	1.36e-09	0.821333	1.63e-05	3.27786	0.001046	#ERROR!
LINC02688	THAP9-AS1	0.022124	0.653539	0.707438	0.000704	3.27768	0.001047	0/+
SIAE	THAP9-AS1	0.189567	0.000104	0.782456	7.52e-05	3.27721	0.001048	#ERROR!
LRATD1	THAP9-AS1	0.26734	3.31e-08	0.812281	2.39e-05	3.27688	0.00105	#ERROR!
EPHA2	THAP9-AS1	0.130939	0.007638	0.757895	0.00017	3.27633	0.001052	#ERROR!
ARHGEF16	THAP9-AS1	0.321903	1.95e-11	0.831579	1.02e-05	3.27599	0.001053	#ERROR!
CXCR3	THAP9-AS1	-0.12659	0.009929	0.624232	0.004281	3.2749	0.001057	-/+
HS3ST3B1	THAP9-AS1	-0.13681	0.005297	0.617815	0.004819	3.27474	0.001058	-/+
PCED1A	THAP9-AS1	0.391067	0	0.854386	3.22e-06	3.27466	0.001058	#ERROR!
ARSA	THAP9-AS1	0.143761	0.003373	0.763158	0.000144	3.2741	0.00106	#ERROR!
LPAR3	THAP9-AS1	0.089994	0.067357	0.739342	0.000298	3.27341	0.001063	0/+
CDC42SE1	THAP9-AS1	0.413771	0	0.861404	2.17e-06	3.27272	0.001065	#ERROR!
MYEF2	THAP9-AS1	0.165995	0.000697	-0.59851	0.006784	-3.27179	0.001069	#ERROR!
PARP8	THAP9-AS1	0.342001	8.4e-13	0.838087	7.48e-06	3.27175	0.001069	#ERROR!
LINC01612	THAP9-AS1	0.199904	4.19e-05	0.786011	6.62e-05	3.27145	0.00107	#ERROR!
CYP2S1	THAP9-AS1	-0.00459	0.925884	0.692982	0.001004	3.27138	0.00107	0/+
ELF1	THAP9-AS1	0.323302	1.58e-11	0.831579	1.02e-05	3.27003	0.001075	#ERROR!
HOOK2	THAP9-AS1	0.490618	0	0.884211	5.1e-07	3.26991	0.001076	#ERROR!
LINC02355	THAP9-AS1	0.121975	0.013006	-0.62625	0.004122	-3.26964	0.001077	#ERROR!
CYP4F3	THAP9-AS1	0.170002	0.000513	0.773684	0.000102	3.26953	0.001077	#ERROR!
SARAF	THAP9-AS1	0.195904	6e-05	0.784211	7.06e-05	3.26943	0.001078	#ERROR!
S100P	THAP9-AS1	0.179498	0.000242	0.777534	8.93e-05	3.26903	0.001079	#ERROR!
MIR27A	THAP9-AS1	0.106917	0.029623	0.746484	0.000242	3.26902	0.001079	#ERROR!
DDX47	THAP9-AS1	0.534498	0	0.896491	2.05e-07	3.269	0.001079	#ERROR!
MAPT	THAP9-AS1	0.211515	1.43e-05	-0.56667	0.011415	-3.26795	0.001083	#ERROR!
OPA3	THAP9-AS1	0.264841	4.49e-08	0.810526	2.58e-05	3.26756	0.001085	#ERROR!
ITPKB	THAP9-AS1	0.143679	0.003392	-0.61228	0.005327	-3.26751	0.001085	#ERROR!
ALOX15B	THAP9-AS1	-0.03517	0.475379	0.676046	0.001485	3.26653	0.001089	0/+
LNCOG	THAP9-AS1	-0.06577	0.181679	0.659037	0.002148	3.26649	0.001089	0/+
LMTK2	THAP9-AS1	0.426636	0	0.864912	1.77e-06	3.26562	0.001092	#ERROR!
KIAA0319L	THAP9-AS1	0.438115	0	0.868421	1.43e-06	3.26555	0.001093	#ERROR!
RDH5	THAP9-AS1	0.12676	0.009828	-0.6222	0.004446	-3.26292	0.001103	#ERROR!
ANKRD44-AS1	THAP9-AS1	0.085787	0.081254	0.736085	0.000327	3.26233	0.001105	0/+
FBXO27	THAP9-AS1	0.119007	0.015404	0.750877	0.000212	3.26045	0.001112	#ERROR!
CYP2D6	THAP9-AS1	0.420625	0	0.862659	2.02e-06	3.25971	0.001115	#ERROR!
BCR	THAP9-AS1	0.262068	6.27e-08	0.808772	2.77e-05	3.2595	0.001116	#ERROR!
HTR1D	THAP9-AS1	-0.0025	0.959544	0.692444	0.001017	3.25949	0.001116	0/+
PKM	THAP9-AS1	0.084466	0.086069	0.735088	0.000336	3.25912	0.001118	0/+
PRSS30P	THAP9-AS1	0.055185	0.262581	0.721125	0.000494	3.25799	0.001122	0/+
B4GALT4	THAP9-AS1	0.331271	4.64e-12	0.833333	9.4e-06	3.25779	0.001123	#ERROR!
SLC41A2	THAP9-AS1	-0.00493	0.920265	-0.69592	0.000936	-3.25672	0.001127	0/-
MIR342	THAP9-AS1	0.025966	0.598315	0.706562	0.00072	3.25635	0.001129	0/+
CYP2J2	THAP9-AS1	0.267654	3.19e-08	0.810526	2.58e-05	3.25602	0.00113	#ERROR!
MAN2C1	THAP9-AS1	0.461837	0	0.874945	9.49e-07	3.25572	0.001131	#ERROR!
MIER2	THAP9-AS1	0.364108	2e-14	0.84423	5.5e-06	3.25556	0.001132	#ERROR!
SARDH	THAP9-AS1	-0.06717	0.172535	0.656428	0.002269	3.25433	0.001137	0/+
EPHA7	THAP9-AS1	0.137487	0.005074	-0.61404	0.005162	-3.25415	0.001137	#ERROR!
AQP4-AS1	THAP9-AS1	0.106618	0.030084	0.744613	0.000255	3.25412	0.001137	#ERROR!
GBP3	THAP9-AS1	0.17823	0.000268	0.775439	9.6e-05	3.25391	0.001138	#ERROR!
LOC101927060	THAP9-AS1	0.344135	5.93e-13	-0.45789	0.048674	-3.25294	0.001142	#ERROR!
CNGB1	THAP9-AS1	-0.02227	0.651378	0.681042	0.001327	3.2526	0.001144	0/+
LOC101930421	THAP9-AS1	0.081893	0.096104	0.733099	0.000356	3.25256	0.001144	0/+
NIBAN2	THAP9-AS1	0.109516	0.025861	0.745614	0.000248	3.25152	0.001148	#ERROR!
LINC01589	THAP9-AS1	0.21676	8.58e-06	0.790698	5.58e-05	3.25149	0.001148	#ERROR!
CNNM4	THAP9-AS1	0.32776	8e-12	0.831579	1.02e-05	3.25103	0.00115	#ERROR!
COL7A1	THAP9-AS1	0.028703	0.560321	0.707018	0.000712	3.24938	0.001157	0/+
MIR647	THAP9-AS1	0.495289	0	0.884298	5.07e-07	3.24792	0.001163	#ERROR!
CYP4F12	THAP9-AS1	0.303495	2.87e-10	0.822807	1.52e-05	3.24784	0.001163	#ERROR!
LOC105371795	THAP9-AS1	0.220386	6e-06	0.791741	5.37e-05	3.24761	0.001164	#ERROR!
PIP5KL1	THAP9-AS1	0.200177	4.09e-05	0.783677	7.2e-05	3.2472	0.001165	#ERROR!
JMJD7	THAP9-AS1	0.33216	4.04e-12	0.832752	9.66e-06	3.24674	0.001167	#ERROR!
PGAM1P5	THAP9-AS1	0.306042	2e-10	0.82348	1.48e-05	3.2451	0.001174	#ERROR!
FGGY	THAP9-AS1	0.349693	2.37e-13	0.838596	7.29e-06	3.24499	0.001175	#ERROR!
FHAD1	THAP9-AS1	0.260493	7.56e-08	0.806848	2.99e-05	3.24485	0.001175	#ERROR!
LRP11	THAP9-AS1	0.189204	0.000107	0.778947	8.5e-05	3.2444	0.001177	#ERROR!
RN7SL574P	THAP9-AS1	0.360688	3.64e-14	-0.44092	0.058811	-3.24392	0.001179	#ERROR!
NBEAL2	THAP9-AS1	0.365709	1.51e-14	0.84386	5.61e-06	3.24361	0.00118	#ERROR!
PKP1	THAP9-AS1	0.096142	0.050606	0.738596	0.000304	3.24351	0.001181	0/+
GS1-24F4.2	THAP9-AS1	0.107398	0.028893	0.743559	0.000263	3.24212	0.001186	#ERROR!
HOXC13-AS	THAP9-AS1	0.092436	0.060225	0.736614	0.000322	3.24119	0.00119	0/+
NANOS1	THAP9-AS1	0.082904	0.092057	-0.6453	0.002848	-3.24106	0.001191	0/-
MEP1A	THAP9-AS1	0.071879	0.144295	0.726956	0.000422	3.24082	0.001192	0/+
ANKRD22	THAP9-AS1	0.114796	0.019469	0.746597	0.000241	3.2396	0.001197	#ERROR!
PDXK	THAP9-AS1	0.207884	2.01e-05	0.785965	6.63e-05	3.23925	0.001198	#ERROR!
CDC42BPG	THAP9-AS1	0.466881	0	0.875439	9.19e-07	3.23924	0.001198	#ERROR!
MAGT1	THAP9-AS1	0.290955	1.61e-09	0.817544	1.92e-05	3.23898	0.0012	#ERROR!
IRAG1-AS1	THAP9-AS1	0.097246	0.047999	0.738561	0.000305	3.23896	0.0012	#ERROR!
SH3RF2	THAP9-AS1	0.089716	0.068211	0.735088	0.000336	3.23895	0.0012	0/+
CACNB2	THAP9-AS1	0.176358	0.000311	-0.58596	0.008379	-3.23884	0.0012	#ERROR!
RANBP3L	THAP9-AS1	0.051208	0.298593	-0.66316	0.001968	-3.2387	0.001201	0/-
DEGS2	THAP9-AS1	0.23852	9.13e-07	0.797892	4.26e-05	3.23831	0.001202	#ERROR!
GJB5	THAP9-AS1	0.037676	0.444545	0.709961	0.000661	3.23766	0.001205	0/+
DUOXA1	THAP9-AS1	0.339813	1.2e-12	0.834577	8.86e-06	3.23667	0.001209	#ERROR!
NIPAL4	THAP9-AS1	0.125393	0.010657	0.750877	0.000212	3.23574	0.001213	#ERROR!
LINC01278	THAP9-AS1	0.383484	4.44e-16	-0.41754	0.07528	-3.23553	0.001214	#ERROR!
MEG9	THAP9-AS1	-0.08403	0.087709	0.643675	0.002942	3.23477	0.001217	0/+
LINC00243	THAP9-AS1	-0.12895	0.008617	0.615894	0.004991	3.23243	0.001227	-/+
MAPKAPK3	THAP9-AS1	0.122711	0.012465	0.749123	0.000223	3.23084	0.001234	#ERROR!
BLCAP	THAP9-AS1	0.313036	7.29e-11	0.824561	1.41e-05	3.22846	0.001245	#ERROR!
HOXD1	THAP9-AS1	0.277784	9e-09	0.811788	2.44e-05	3.22837	0.001245	#ERROR!
DUSP16	THAP9-AS1	0.27439	1.38e-08	0.810526	2.58e-05	3.22831	0.001245	#ERROR!
JDP2	THAP9-AS1	0.030742	0.532778	0.705263	0.000744	3.22826	0.001245	0/+
MYBBP1A	THAP9-AS1	0.385121	4.44e-16	0.849123	4.27e-06	3.22825	0.001245	#ERROR!
HOXB8	THAP9-AS1	0.173745	0.000383	0.770852	0.000112	3.22809	0.001246	#ERROR!
DDR1	THAP9-AS1	0.364029	2.04e-14	0.842105	6.13e-06	3.22789	0.001247	#ERROR!
LINC00668	THAP9-AS1	0.071623	0.145732	0.725131	0.000443	3.22709	0.001251	0/+
NRARP	THAP9-AS1	0.013922	0.777615	0.696491	0.000923	3.22669	0.001252	0/+
FZD10-AS1	THAP9-AS1	0.077977	0.113147	0.72807	0.000409	3.22647	0.001253	0/+
LINC01671	THAP9-AS1	0.193531	7.39e-05	0.778862	8.53e-05	3.22645	0.001253	#ERROR!
ARHGAP27	THAP9-AS1	0.457922	0	0.87193	1.15e-06	3.22617	0.001255	#ERROR!
P4HTM	THAP9-AS1	0.401814	0	0.854386	3.22e-06	3.22605	0.001255	#ERROR!
SLC44A1	THAP9-AS1	0.233467	1.57e-06	0.794737	4.8e-05	3.22583	0.001256	#ERROR!
PLA2G4E	THAP9-AS1	0.061363	0.21278	0.719831	0.000511	3.2241	0.001264	0/+
MLC1	THAP9-AS1	-0.0289	0.557582	0.673398	0.001575	3.22408	0.001264	0/+
SLC6A2	THAP9-AS1	-0.08927	0.069593	0.638877	0.003235	3.22384	0.001265	0/+
C6orf132	THAP9-AS1	0.211826	1.38e-05	0.785965	6.63e-05	3.22354	0.001266	#ERROR!
CAPN10	THAP9-AS1	0.375647	2.66e-15	0.845614	5.13e-06	3.22304	0.001268	#ERROR!
RASAL3	THAP9-AS1	-0.1011	0.039771	0.631579	0.003726	3.2227	0.00127	-/+
SLC20A1	THAP9-AS1	0.203323	3.07e-05	0.782456	7.52e-05	3.22267	0.00127	#ERROR!
LINC02363	THAP9-AS1	0.327708	8.06e-12	0.82923	1.14e-05	3.22241	0.001271	#ERROR!
PAN2	THAP9-AS1	0.476285	0	0.877193	8.2e-07	3.22196	0.001273	#ERROR!
SALL4	THAP9-AS1	0.207697	2.05e-05	0.784149	7.08e-05	3.22196	0.001273	#ERROR!
LMO3	THAP9-AS1	0.034202	0.487682	-0.67018	0.001691	-3.22191	0.001273	0/-
BRINP3	THAP9-AS1	0.071987	0.143692	0.724638	0.000449	3.22174	0.001274	0/+
FYCO1	THAP9-AS1	0.224024	4.16e-06	-0.54912	0.01489	-3.2209	0.001278	#ERROR!
CD101	THAP9-AS1	0.00142	0.97702	0.689201	0.001098	3.2209	0.001278	0/+
MGC12916	THAP9-AS1	-0.13155	0.007359	0.612341	0.005322	3.22074	0.001279	-/+
CCAR2	THAP9-AS1	0.230374	2.17e-06	0.792982	5.13e-05	3.22021	0.001281	#ERROR!
ANXA8L1	THAP9-AS1	0.063941	0.194149	0.720492	0.000502	3.21947	0.001284	0/+
FBP1	THAP9-AS1	0.253396	1.73e-07	0.801754	3.66e-05	3.21882	0.001287	#ERROR!
ACOT2	THAP9-AS1	0.204065	2.87e-05	-0.56316	0.012052	-3.21863	0.001288	#ERROR!
PDZD3	THAP9-AS1	0.24943	2.73e-07	0.800176	3.9e-05	3.21817	0.00129	#ERROR!
C1orf220	THAP9-AS1	0.407925	0	0.855764	2.98e-06	3.21773	0.001292	#ERROR!
MIR4713HG	THAP9-AS1	0.184326	0.000162	0.774135	0.0001	3.21745	0.001293	#ERROR!
LY75	THAP9-AS1	0.249225	2.79e-07	0.8	3.92e-05	3.21714	0.001295	#ERROR!
CLCN2	THAP9-AS1	0.376585	2.22e-15	0.845479	5.16e-06	3.21707	0.001295	#ERROR!
MLKL	THAP9-AS1	0.09955	0.042923	0.736842	0.00032	3.21572	0.001301	#ERROR!
CASP1	THAP9-AS1	0.00667	0.892363	0.691228	0.001047	3.21564	0.001302	0/+
AREL1	THAP9-AS1	0.346196	4.23e-13	0.835088	8.65e-06	3.21552	0.001302	#ERROR!
RAI1	THAP9-AS1	0.426514	0	0.861404	2.17e-06	3.21373	0.00131	#ERROR!
DSTN	THAP9-AS1	0.134761	0.006028	-0.60877	0.005672	-3.21153	0.00132	#ERROR!
KBTBD11-OT1	THAP9-AS1	0.067196	0.172367	0.721026	0.000495	3.21125	0.001322	0/+
LINC01289	THAP9-AS1	0.175808	0.000325	-0.58155	0.009008	-3.21115	0.001322	#ERROR!
LINC00592	THAP9-AS1	0.071967	0.143802	0.723294	0.000466	3.21105	0.001323	0/+
RNF223	THAP9-AS1	0.233074	1.63e-06	0.792969	5.13e-05	3.2092	0.001331	#ERROR!
ARL14	THAP9-AS1	0.27206	1.85e-08	0.807914	2.87e-05	3.20906	0.001332	#ERROR!
KRT13	THAP9-AS1	0.116627	0.0176	0.74386	0.000261	3.20906	0.001332	#ERROR!
CIITA	THAP9-AS1	0.015273	0.756679	0.694737	0.000963	3.20858	0.001334	0/+
PAQR6	THAP9-AS1	0.431626	0	0.862659	2.02e-06	3.20848	0.001334	#ERROR!
LINC02018	THAP9-AS1	0.283098	4.54e-09	0.811952	2.43e-05	3.20822	0.001336	#ERROR!
RAP2B	THAP9-AS1	0.186042	0.000141	0.773684	0.000102	3.2064	0.001344	#ERROR!
KCNN4	THAP9-AS1	0.157164	0.001336	0.761404	0.000153	3.20587	0.001347	#ERROR!
CLN8	THAP9-AS1	0.256623	1.19e-07	0.801754	3.66e-05	3.20566	0.001348	#ERROR!
FAM155A	THAP9-AS1	-0.01324	0.788303	0.679245	0.001382	3.20541	0.001349	0/+
KLHL42	THAP9-AS1	0.220084	6.18e-06	-0.54912	0.01489	-3.2051	0.00135	#ERROR!
ATAT1	THAP9-AS1	0.509492	0	0.885965	4.51e-07	3.20485	0.001351	#ERROR!
ORC2	THAP9-AS1	0.428465	0	0.861404	2.17e-06	3.20463	0.001352	#ERROR!
LINC00174	THAP9-AS1	0.485757	0	0.878947	7.3e-07	3.20419	0.001354	#ERROR!
SLC44A2	THAP9-AS1	0.234446	1.41e-06	0.792982	5.13e-05	3.2038	0.001356	#ERROR!
DCBLD1	THAP9-AS1	0.072897	0.138681	0.722807	0.000472	3.20359	0.001357	0/+
SH2D4A	THAP9-AS1	0.294815	9.54e-10	0.815789	2.07e-05	3.20281	0.001361	#ERROR!
ENTPD6	THAP9-AS1	0.352863	1.39e-13	0.836332	8.14e-06	3.2023	0.001363	#ERROR!
DPP10-AS1	THAP9-AS1	0.153196	0.001771	0.759253	0.000163	3.20193	0.001365	#ERROR!
PLCE1	THAP9-AS1	0.32429	1.36e-11	0.826316	1.3e-05	3.2017	0.001366	#ERROR!
LUC7L	THAP9-AS1	0.457311	0	0.870175	1.28e-06	3.2014	0.001368	#ERROR!
AKAP17A	THAP9-AS1	0.51625	0	0.887719	3.97e-07	3.20122	0.001368	#ERROR!
PIK3R5	THAP9-AS1	-0.15093	0.002075	0.596491	0.007023	3.20092	0.00137	-/+
RPS3P2	THAP9-AS1	0.272405	1.77e-08	0.807128	2.96e-05	3.19903	0.001379	#ERROR!
EFNA1	THAP9-AS1	0.267634	3.2e-08	0.805263	3.19e-05	3.19834	0.001382	#ERROR!
PKD2L1	THAP9-AS1	-0.0068	0.890307	0.681667	0.001308	3.19806	0.001384	0/+
CASS4	THAP9-AS1	-0.04311	0.381569	0.661694	0.002031	3.19784	0.001385	0/+
HLA-DQA1	THAP9-AS1	-0.14454	0.003204	0.6	0.006612	3.19685	0.001389	-/+
CLIC6	THAP9-AS1	0.053478	0.277655	0.712281	0.000623	3.1952	0.001397	0/+
ARGLU1	THAP9-AS1	0.580175	0	0.905263	9.97e-08	3.19383	0.001404	#ERROR!
APOC2	THAP9-AS1	-0.0122	0.804496	0.678115	0.001418	3.19348	0.001406	0/+
ABI1	THAP9-AS1	0.351336	1.8e-13	0.835088	8.65e-06	3.19322	0.001407	#ERROR!
GYG2	THAP9-AS1	0.066861	0.174516	-0.64737	0.002732	-3.19309	0.001408	0/-
DKK4	THAP9-AS1	0.213024	1.23e-05	0.783299	7.3e-05	3.19231	0.001411	#ERROR!
N4BP1	THAP9-AS1	0.307412	1.64e-10	0.819298	1.78e-05	3.19034	0.001421	#ERROR!
RASSF6	THAP9-AS1	0.297383	6.71e-10	0.815628	2.08e-05	3.19024	0.001422	#ERROR!
LOC105369306	THAP9-AS1	0.117563	0.016706	0.742063	0.000275	3.19016	0.001422	#ERROR!
SHROOM2	THAP9-AS1	0.251358	2.19e-07	0.798246	4.2e-05	3.18996	0.001423	#ERROR!
BICDL2	THAP9-AS1	0.382445	8.88e-16	0.845344	5.2e-06	3.18917	0.001427	#ERROR!
PRAM1	THAP9-AS1	-0.07257	0.140454	0.643265	0.002966	3.18816	0.001432	0/+
GNAL	THAP9-AS1	0.155563	0.001498	-0.59123	0.007676	-3.18803	0.001432	#ERROR!
SDC1	THAP9-AS1	0.194931	6.53e-05	0.775439	9.6e-05	3.18795	0.001433	#ERROR!
DGKQ	THAP9-AS1	0.394179	0	0.849123	4.27e-06	3.18755	0.001435	#ERROR!
SERINC2	THAP9-AS1	0.273542	1.54e-08	0.806494	3.03e-05	3.18742	0.001435	#ERROR!
LINC00511	THAP9-AS1	0.250737	2.35e-07	0.797718	4.29e-05	3.18696	0.001438	#ERROR!
LOC105375431	THAP9-AS1	0.135304	0.005827	0.749649	0.00022	3.18661	0.00144	#ERROR!
ACER1	THAP9-AS1	-0.02845	0.56376	0.668168	0.001767	3.18611	0.001442	0/+
RNF19B	THAP9-AS1	0.028441	0.563898	0.698246	0.000885	3.18434	0.001451	0/+
MT1F	THAP9-AS1	0.000788	0.987252	0.683633	0.00125	3.18318	0.001457	0/+
DPP9-AS1	THAP9-AS1	0.444264	0	0.86494	1.76e-06	3.18313	0.001457	#ERROR!
RNU1-103P	THAP9-AS1	0.438992	0	0.863247	1.95e-06	3.18262	0.00146	#ERROR!
LFNG	THAP9-AS1	0.041601	0.39852	0.704695	0.000755	3.18251	0.00146	0/+
MYO1G	THAP9-AS1	-0.16712	0.00064	0.582456	0.008876	3.18225	0.001461	-/+
BLNK	THAP9-AS1	0.22235	4.93e-06	0.785965	6.63e-05	3.18144	0.001465	#ERROR!
SLC29A2	THAP9-AS1	0.303341	2.93e-10	0.817025	1.96e-05	3.18124	0.001466	#ERROR!
SEC23B	THAP9-AS1	0.218074	7.54e-06	0.784211	7.06e-05	3.18114	0.001467	#ERROR!
DHRS2	THAP9-AS1	0.19247	8.11e-05	0.773684	0.000102	3.18098	0.001468	#ERROR!
KCNQ4	THAP9-AS1	0.11294	0.021539	-0.61754	0.004843	-3.18063	0.00147	#ERROR!
PWWP2B	THAP9-AS1	0.236448	1.14e-06	0.791228	5.47e-05	3.17778	0.001484	#ERROR!
CCDC26	THAP9-AS1	-0.11013	0.025038	0.618703	0.004742	3.17693	0.001488	-/+
LINC01605	THAP9-AS1	0.062129	0.207119	0.714163	0.000593	3.17671	0.00149	0/+
GUCY2C	THAP9-AS1	0.282291	5.04e-09	0.808772	2.77e-05	3.17625	0.001492	#ERROR!
MXRA5	THAP9-AS1	-0.05639	0.252273	0.650877	0.002544	3.17614	0.001492	0/+
IVL	THAP9-AS1	0.109847	0.025413	0.736842	0.00032	3.17604	0.001493	#ERROR!
IL17RD	THAP9-AS1	0.079963	0.104227	-0.63684	0.003366	-3.17503	0.001498	0/-
PPIAP51	THAP9-AS1	0.166054	0.000694	0.761785	0.000151	3.17454	0.001501	#ERROR!
MISP	THAP9-AS1	-0.03223	0.5131	0.664327	0.00192	3.17421	0.001502	0/+
SLC66A2	THAP9-AS1	0.076928	0.118092	0.721053	0.000495	3.17417	0.001503	0/+
PLCXD2	THAP9-AS1	0.104217	0.034018	0.733977	0.000347	3.17397	0.001504	#ERROR!
MTURN	THAP9-AS1	0.299043	5.34e-10	-0.4807	0.037218	-3.17269	0.00151	#ERROR!
KRT16	THAP9-AS1	-0.04977	0.312388	0.654083	0.002382	3.17211	0.001513	0/+
ERICH6B	THAP9-AS1	0.438423	0	0.862329	2.05e-06	3.17161	0.001516	#ERROR!
C11orf65	THAP9-AS1	0.321301	2.14e-11	0.822652	1.53e-05	3.1708	0.00152	#ERROR!
RGL3	THAP9-AS1	0.278995	7.71e-09	0.807018	2.97e-05	3.17063	0.001521	#ERROR!
ELF4	THAP9-AS1	0.341477	9.14e-13	0.829825	1.11e-05	3.17057	0.001521	#ERROR!
SLC14A1	THAP9-AS1	0.221631	5.3e-06	0.784555	6.98e-05	3.1703	0.001523	#ERROR!
GPRC5C	THAP9-AS1	0.216472	8.83e-06	0.782456	7.52e-05	3.17024	0.001523	#ERROR!
PLEKHF2	THAP9-AS1	0.377225	1.78e-15	0.842105	6.13e-06	3.16957	0.001527	#ERROR!
ELF3	THAP9-AS1	0.382528	6.66e-16	0.84386	5.61e-06	3.16906	0.001529	#ERROR!
GPR135	THAP9-AS1	0.155932	0.001459	-0.58772	0.008139	-3.16897	0.00153	#ERROR!
RNASE7	THAP9-AS1	0.047632	0.333654	0.705936	0.000732	3.16889	0.00153	0/+
PPP1R13L	THAP9-AS1	0.298402	5.83e-10	0.814035	2.23e-05	3.16791	0.001535	#ERROR!
IGSF3	THAP9-AS1	0.217315	8.13e-06	0.782456	7.52e-05	3.16687	0.001541	#ERROR!
ACY1	THAP9-AS1	0.332489	3.83e-12	0.826316	1.3e-05	3.16667	0.001542	#ERROR!
ARID3B	THAP9-AS1	0.363643	2.18e-14	0.837209	7.81e-06	3.16631	0.001544	#ERROR!
RTP4	THAP9-AS1	0.123842	0.011672	0.742105	0.000275	3.16622	0.001544	#ERROR!
CAND2	THAP9-AS1	0.139299	0.004517	-0.59825	0.006815	-3.16604	0.001545	#ERROR!
SH3D19	THAP9-AS1	0.236117	1.18e-06	-0.52982	0.019639	-3.16581	0.001547	#ERROR!
ALDH5A1	THAP9-AS1	0.367867	1.02e-14	0.838596	7.29e-06	3.16547	0.001548	#ERROR!
FGFR3	THAP9-AS1	0.216386	8.9e-06	0.781922	7.66e-05	3.16534	0.001549	#ERROR!
MIR2117HG	THAP9-AS1	0.034665	0.481807	0.698643	0.000876	3.16355	0.001559	0/+
FOSL1	THAP9-AS1	-0.09997	0.042041	0.622807	0.004396	3.16325	0.00156	-/+
HCAR2	THAP9-AS1	0.04103	0.405033	0.701754	0.000812	3.16252	0.001564	0/+
DSC2	THAP9-AS1	0.088147	0.073198	0.724879	0.000446	3.16167	0.001569	0/+
PPM1L	THAP9-AS1	0.266364	3.73e-08	-0.50526	0.027337	-3.16099	0.001572	#ERROR!
MARCHF2	THAP9-AS1	0.166817	0.000655	-0.57895	0.009396	-3.16089	0.001573	#ERROR!
LINC01117	THAP9-AS1	0.023837	0.628667	0.692557	0.001015	3.15991	0.001578	0/+
AGR3	THAP9-AS1	0.113101	0.021353	0.736342	0.000325	3.15931	0.001581	#ERROR!
RHOT1P1	THAP9-AS1	0.294077	1.05e-09	0.811633	2.46e-05	3.15899	0.001583	#ERROR!
SLFN12L	THAP9-AS1	-0.00525	0.915179	0.676925	0.001456	3.15859	0.001585	0/+
ANXA2	THAP9-AS1	-0.04261	0.387126	0.65614	0.002282	3.15851	0.001586	0/+
AIG1	THAP9-AS1	0.28197	5.26e-09	0.807018	2.97e-05	3.15833	0.001587	#ERROR!
IFNA1	THAP9-AS1	0.130037	0.00807	0.743894	0.000261	3.15744	0.001592	#ERROR!
DOK7	THAP9-AS1	0.152446	0.001867	0.753839	0.000193	3.15661	0.001596	#ERROR!
C5orf38	THAP9-AS1	0.009613	0.845384	0.68462	0.001222	3.1566	0.001596	0/+
CYP4A11	THAP9-AS1	0.236713	1.11e-06	0.789226	5.89e-05	3.15639	0.001597	#ERROR!
CD46	THAP9-AS1	0.489547	0	0.877193	8.2e-07	3.15603	0.001599	#ERROR!
DPP10	THAP9-AS1	0.097951	0.046397	0.728819	0.000401	3.15582	0.0016	#ERROR!
EME2	THAP9-AS1	0.501387	0	0.880702	6.49e-07	3.15502	0.001605	#ERROR!
GABRG3	THAP9-AS1	0.096533	0.049669	0.727971	0.00041	3.15438	0.001608	#ERROR!
LRATD2	THAP9-AS1	0.370433	6.66e-15	0.838596	7.29e-06	3.15415	0.00161	#ERROR!
LOC103344931	THAP9-AS1	0.344477	5.61e-13	-0.43684	0.061469	-3.15409	0.00161	#ERROR!
CTSE	THAP9-AS1	0.164773	0.000764	0.758934	0.000165	3.15379	0.001612	#ERROR!
FER1L5	THAP9-AS1	0.184623	0.000158	0.767474	0.000125	3.15372	0.001612	#ERROR!
ELP5	THAP9-AS1	0.326144	1.03e-11	0.822807	1.52e-05	3.15201	0.001622	#ERROR!
ABHD12	THAP9-AS1	0.251779	2.09e-07	0.794737	4.8e-05	3.15167	0.001623	#ERROR!
AGAP11	THAP9-AS1	0.347594	3.36e-13	0.830406	1.08e-05	3.15124	0.001626	#ERROR!
SLAMF7	THAP9-AS1	-0.07959	0.10586	0.633333	0.003603	3.15118	0.001626	0/+
LOC729654	THAP9-AS1	0.22114	5.56e-06	0.782386	7.54e-05	3.15087	0.001628	#ERROR!
GALNS	THAP9-AS1	0.124074	0.011515	0.740351	0.000289	3.15049	0.00163	#ERROR!
RECQL5	THAP9-AS1	0.468409	0	0.870175	1.28e-06	3.14756	0.001646	#ERROR!
LPCAT2	THAP9-AS1	0.031435	0.523587	0.694737	0.000963	3.14694	0.00165	0/+
LOC105375095	THAP9-AS1	0.334388	2.84e-12	0.825345	1.36e-05	3.14689	0.00165	#ERROR!
MPP2	THAP9-AS1	0.173384	0.000394	-0.57193	0.010511	-3.14668	0.001651	#ERROR!
MIR133A1HG	THAP9-AS1	0.1839	0.000168	-0.56453	0.011799	-3.14643	0.001653	#ERROR!
ABR	THAP9-AS1	0.262129	6.22e-08	0.798246	4.2e-05	3.14601	0.001655	#ERROR!
CRYBB3	THAP9-AS1	0.130955	0.007631	0.742951	0.000268	3.14585	0.001656	#ERROR!
SLC35D1	THAP9-AS1	0.201352	3.68e-05	0.773684	0.000102	3.14576	0.001657	#ERROR!
SEPTIN4-AS1	THAP9-AS1	0.182542	0.000188	0.765498	0.000134	3.14367	0.001668	#ERROR!
FA2H	THAP9-AS1	0.317298	3.89e-11	0.81878	1.82e-05	3.14258	0.001675	#ERROR!
RNU6-1278P	THAP9-AS1	0.230175	2.21e-06	-0.52982	0.01964	-3.14185	0.001679	#ERROR!
SLC6A11	THAP9-AS1	0.152276	0.001889	0.752084	0.000204	3.14182	0.001679	#ERROR!
RPL17P6	THAP9-AS1	0.23229	1.77e-06	0.785965	6.63e-05	3.14149	0.001681	#ERROR!
IMPDH2	THAP9-AS1	0.198283	4.85e-05	0.77193	0.000108	3.14134	0.001682	#ERROR!
RHOD	THAP9-AS1	-0.06818	0.166142	0.638596	0.003253	3.14114	0.001683	0/+
GNAZ	THAP9-AS1	0.076326	0.121007	-0.63361	0.003583	-3.14043	0.001687	0/-
FBN2	THAP9-AS1	0.00656	0.894129	0.680702	0.001337	3.14027	0.001688	0/+
SLC52A1	THAP9-AS1	0.206926	2.2e-05	0.775386	9.61e-05	3.13981	0.001691	#ERROR!
ANKRD2	THAP9-AS1	-0.10674	0.029893	0.614574	0.005112	3.13848	0.001698	-/+
SLC3A2	THAP9-AS1	0.068462	0.164405	0.712281	0.000623	3.13787	0.001702	0/+
CARD11	THAP9-AS1	0.1992	4.47e-05	0.77193	0.000108	3.13771	0.001703	#ERROR!
ACIN1	THAP9-AS1	0.55257	0	0.894737	2.35e-07	3.13742	0.001704	#ERROR!
POU3F1	THAP9-AS1	0.19409	7.04e-05	0.769636	0.000117	3.13642	0.00171	#ERROR!
RNF32	THAP9-AS1	0.344629	5.47e-13	0.82807	1.2e-05	3.13558	0.001715	#ERROR!
HTATIP2	THAP9-AS1	0.159092	0.001162	0.754386	0.00019	3.13548	0.001716	#ERROR!
RXFP1	THAP9-AS1	0.102301	0.037463	0.728319	0.000406	3.13501	0.001718	#ERROR!
RPS2P32	THAP9-AS1	0.05147	0.296118	0.703249	0.000782	3.13388	0.001725	0/+
MAB21L4	THAP9-AS1	-0.0314	0.524044	0.658753	0.002161	3.13326	0.001729	0/+
LSM11	THAP9-AS1	0.184934	0.000154	-0.5614	0.01238	-3.13306	0.00173	#ERROR!
FGFRL1	THAP9-AS1	0.163744	0.000825	0.75614	0.00018	3.13284	0.001731	#ERROR!
CARD9	THAP9-AS1	0.122511	0.01261	0.737489	0.000314	3.13251	0.001733	#ERROR!
REG4	THAP9-AS1	0.229521	2.37e-06	0.783802	7.17e-05	3.13116	0.001741	#ERROR!
IDI2-AS1	THAP9-AS1	0.35119	1.84e-13	0.829974	1.1e-05	3.13033	0.001746	#ERROR!
MYO5C	THAP9-AS1	0.279654	7.09e-09	0.803509	3.42e-05	3.12987	0.001749	#ERROR!
PKHD1	THAP9-AS1	0.224146	4.11e-06	0.781387	7.81e-05	3.12901	0.001754	#ERROR!
CALHM6	THAP9-AS1	-0.0619	0.208769	0.640351	0.003142	3.12843	0.001757	0/+
LINC01089	THAP9-AS1	0.36974	7.55e-15	0.836332	8.14e-06	3.1283	0.001758	#ERROR!
PATL2	THAP9-AS1	0.137153	0.005183	0.743635	0.000263	3.12762	0.001762	#ERROR!
PRSS3	THAP9-AS1	0.028807	0.558894	0.690686	0.001061	3.12728	0.001764	0/+
CKB	THAP9-AS1	0.118207	0.016114	-0.60526	0.006034	-3.12622	0.001771	#ERROR!
SHTN1	THAP9-AS1	0.078675	0.109947	0.715789	0.000568	3.12601	0.001772	0/+
BAG1	THAP9-AS1	0.317853	3.59e-11	0.817544	1.92e-05	3.12597	0.001772	#ERROR!
FCRL6	THAP9-AS1	-0.02725	0.580321	0.659939	0.002108	3.12542	0.001776	0/+
AGER	THAP9-AS1	0.38202	8.88e-16	0.840351	6.69e-06	3.12534	0.001776	#ERROR!
IL19	THAP9-AS1	0.15741	0.001313	0.752455	0.000202	3.12503	0.001778	#ERROR!
KLRC1	THAP9-AS1	0.057407	0.243819	0.705057	0.000748	3.12485	0.001779	0/+
LOC648987	THAP9-AS1	0.13071	0.007746	0.740351	0.000289	3.12477	0.001779	#ERROR!
SLC31A1	THAP9-AS1	0.182121	0.000195	0.763158	0.000144	3.12388	0.001785	#ERROR!
MYO5B	THAP9-AS1	0.314669	5.74e-11	0.816148	2.03e-05	3.12346	0.001787	#ERROR!
PI4KB	THAP9-AS1	0.473472	0	0.870175	1.28e-06	3.12276	0.001792	#ERROR!
PHYKPL	THAP9-AS1	0.446034	0	0.861404	2.17e-06	3.12183	0.001797	#ERROR!
NECAB1	THAP9-AS1	-0.00167	0.97298	-0.67544	0.001506	-3.12178	0.001798	0/-
ATL3	THAP9-AS1	0.146287	0.002849	-0.58596	0.008379	-3.12115	0.001801	#ERROR!
CLIC3	THAP9-AS1	-0.03256	0.508873	0.65614	0.002282	3.12012	0.001808	0/+
CCL5	THAP9-AS1	-0.12016	0.014427	0.602896	0.006289	3.11958	0.001811	-/+
PLEKHG5	THAP9-AS1	0.344481	5.6e-13	0.826678	1.28e-05	3.1194	0.001812	#ERROR!
H4-16	THAP9-AS1	0.440922	0	0.859526	2.41e-06	3.11852	0.001818	#ERROR!
LGALS3	THAP9-AS1	0.095195	0.052932	0.722807	0.000472	3.11799	0.001821	0/+
LINC01088	THAP9-AS1	0.190019	0.0001	-0.55487	0.013669	-3.11699	0.001827	#ERROR!
PRSS3P4	THAP9-AS1	0.142382	0.003695	0.744761	0.000254	3.11691	0.001828	#ERROR!
LOC644090	THAP9-AS1	-0.08999	0.067355	0.621417	0.004511	3.11621	0.001832	0/+
GPD2	THAP9-AS1	0.339527	1.25e-12	0.824561	1.41e-05	3.11544	0.001837	#ERROR!
CNGA1	THAP9-AS1	0.343262	6.84e-13	0.825801	1.33e-05	3.11413	0.001845	#ERROR!
ERBB3	THAP9-AS1	0.339934	1.17e-12	0.824561	1.41e-05	3.11368	0.001848	#ERROR!
SERPINB11	THAP9-AS1	0.048861	0.321313	0.699142	0.000866	3.11306	0.001852	0/+
PRR5-ARHGAP8	THAP9-AS1	0.236116	1.18e-06	0.784597	6.97e-05	3.11246	0.001855	#ERROR!
FSCN1	THAP9-AS1	-0.07817	0.112251	0.62807	0.003983	3.11242	0.001856	0/+
GCC1	THAP9-AS1	0.255783	1.32e-07	0.792453	5.23e-05	3.11184	0.001859	#ERROR!
LOC105369748	THAP9-AS1	0.197839	5.05e-05	0.768556	0.000121	3.11149	0.001861	#ERROR!
EPB41L4B	THAP9-AS1	0.297931	6.22e-10	0.808772	2.77e-05	3.11116	0.001864	#ERROR!
ANKRD34A	THAP9-AS1	0.274468	1.37e-08	-0.48881	0.033692	-3.11102	0.001864	#ERROR!
PCLO	THAP9-AS1	0.158199	0.00124	0.751207	0.00021	3.111	0.001865	#ERROR!
B3GALT1	THAP9-AS1	0.054893	0.265118	-0.64139	0.003079	-3.10831	0.001882	0/-
AGAP6	THAP9-AS1	0.545829	0	0.891228	3.07e-07	3.10819	0.001882	#ERROR!
ENTPD5	THAP9-AS1	0.331672	4.36e-12	0.821053	1.65e-05	3.10777	0.001885	#ERROR!
HMGCS2	THAP9-AS1	0.190484	9.63e-05	0.764912	0.000136	3.10692	0.00189	#ERROR!
SMARCD1	THAP9-AS1	0.331991	4.14e-12	0.821053	1.65e-05	3.10641	0.001894	#ERROR!
ANO5	THAP9-AS1	0.061877	0.208967	-0.63684	0.003366	-3.10574	0.001898	0/-
BMPR1A	THAP9-AS1	0.305485	2.16e-10	-0.4614	0.046756	-3.10517	0.001902	#ERROR!
FOXP2	THAP9-AS1	0.013042	0.791336	-0.66491	0.001896	-3.10502	0.001903	0/-
ACTR3C	THAP9-AS1	0.29957	4.96e-10	0.808772	2.77e-05	3.1043	0.001907	#ERROR!
REEP1	THAP9-AS1	-0.00011	0.998223	-0.67193	0.001627	-3.10324	0.001914	0/-
ACP3	THAP9-AS1	0.140223	0.004255	0.742105	0.000275	3.10268	0.001918	#ERROR!
LOC101929331	THAP9-AS1	-0.00812	0.869144	0.667254	0.001802	3.1023	0.00192	0/+
CCDC200	THAP9-AS1	0.036521	0.458632	0.691261	0.001046	3.10204	0.001922	0/+
GPR143	THAP9-AS1	0.233467	1.57e-06	0.782419	7.53e-05	3.10164	0.001924	#ERROR!
RPSAP19	THAP9-AS1	0.074476	0.130308	0.710526	0.000651	3.10129	0.001927	0/+
LST1	THAP9-AS1	-0.2035	3.02e-05	0.542105	0.016497	3.10083	0.00193	-/+
PPP1R14D	THAP9-AS1	0.12875	0.008724	0.736571	0.000322	3.10068	0.001931	#ERROR!
HLA-DQB2	THAP9-AS1	-0.08075	0.100856	0.624561	0.004255	3.10031	0.001933	0/+
CHRM3	THAP9-AS1	-0.01783	0.71751	-0.681	0.001328	-3.09942	0.001939	0/-
ICA1	THAP9-AS1	0.434647	0	0.85614	2.92e-06	3.09924	0.00194	#ERROR!
PLCD1	THAP9-AS1	0.264631	4.61e-08	0.794737	4.8e-05	3.09918	0.001941	#ERROR!
ACSBG1	THAP9-AS1	0.287165	2.66e-09	0.803509	3.42e-05	3.09873	0.001944	#ERROR!
ANXA9	THAP9-AS1	0.242878	5.67e-07	0.785965	6.63e-05	3.09871	0.001944	#ERROR!
CORO2A	THAP9-AS1	0.381462	8.88e-16	0.838087	7.48e-06	3.09866	0.001944	#ERROR!
HOXD4	THAP9-AS1	0.221269	5.49e-06	0.777059	9.08e-05	3.09855	0.001945	#ERROR!
PSTPIP1	THAP9-AS1	-0.10636	0.030492	0.608162	0.005733	3.09796	0.001949	-/+
GAA	THAP9-AS1	0.133819	0.006394	0.738596	0.000304	3.09795	0.001949	#ERROR!
PPP1R26-AS1	THAP9-AS1	0.387929	2.22e-16	0.840211	6.74e-06	3.09709	0.001954	#ERROR!
MOB3C	THAP9-AS1	0.343862	6.2e-13	0.824561	1.41e-05	3.09673	0.001957	#ERROR!
MROH2A	THAP9-AS1	0.144611	0.003188	0.743392	0.000265	3.09654	0.001958	#ERROR!
LOC102724163	THAP9-AS1	-0.10168	0.038643	0.610722	0.005478	3.09546	0.001965	-/+
PRICKLE4	THAP9-AS1	0.368275	9.55e-15	0.833187	9.47e-06	3.09524	0.001967	#ERROR!
KRT15	THAP9-AS1	0.152616	0.001845	0.746819	0.000239	3.09471	0.00197	#ERROR!
DGKB	THAP9-AS1	-0.07273	0.1396	-0.70877	0.000681	-3.09451	0.001971	0/-
PLCXD1	THAP9-AS1	0.292915	1.23e-09	0.805263	3.19e-05	3.09375	0.001976	#ERROR!
PEX14	THAP9-AS1	0.40783	0	-0.3614	0.128435	-3.09318	0.00198	#ERROR!
MSH4	THAP9-AS1	0.261235	6.92e-08	-0.49604	0.030772	-3.09306	0.001981	#ERROR!
FOXC1	THAP9-AS1	0.101697	0.038608	0.722807	0.000472	3.09296	0.001982	#ERROR!
SLC16A1	THAP9-AS1	-0.10914	0.026385	-0.72632	0.000429	-3.09245	0.001985	-/-
RIMS3	THAP9-AS1	0.122911	0.012321	-0.59649	0.007023	-3.09209	0.001988	#ERROR!
LINC00092	THAP9-AS1	-0.06599	0.180242	0.631856	0.003706	3.08966	0.002004	0/+
MMP7	THAP9-AS1	0.004896	0.920881	0.672529	0.001606	3.08916	0.002007	0/+
ANKRD20A8P	THAP9-AS1	0.182912	0.000183	0.759593	0.000162	3.08843	0.002012	#ERROR!
DUSP6	THAP9-AS1	0.143943	0.003333	0.742105	0.000275	3.0882	0.002014	#ERROR!
NPAS2	THAP9-AS1	0.312669	7.69e-11	0.812281	2.39e-05	3.08819	0.002014	#ERROR!
SFN	THAP9-AS1	-0.02714	0.581936	0.654386	0.002367	3.08772	0.002017	0/+
CCL4L2	THAP9-AS1	-0.1359	0.005612	0.5871	0.008223	3.08734	0.00202	-/+
FHL2	THAP9-AS1	0.096232	0.050388	0.719298	0.000518	3.08614	0.002028	0/+
GNA15	THAP9-AS1	0.078495	0.110763	0.710526	0.000651	3.08588	0.00203	0/+
MAP3K5	THAP9-AS1	0.31363	6.69e-11	0.812281	2.39e-05	3.08413	0.002041	#ERROR!
IKZF4	THAP9-AS1	0.446178	0	-0.31754	0.185247	-3.08299	0.002049	#ERROR!
FOXI3	THAP9-AS1	0.129471	0.008352	0.734747	0.00034	3.08274	0.002051	#ERROR!
LPIN3	THAP9-AS1	0.498563	0	0.875439	9.19e-07	3.08175	0.002058	#ERROR!
LGALS2	THAP9-AS1	-0.14397	0.003326	0.580702	0.009133	3.08173	0.002058	-/+
RNF213	THAP9-AS1	0.192857	7.84e-05	0.763158	0.000144	3.08146	0.00206	#ERROR!
CD55	THAP9-AS1	0.255921	1.29e-07	0.789474	5.84e-05	3.08094	0.002063	#ERROR!
H1-6	THAP9-AS1	0.328916	6.69e-12	-0.43546	0.062387	-3.0807	0.002065	#ERROR!
PART1	THAP9-AS1	0.046348	0.34686	-0.64211	0.003035	-3.08031	0.002068	0/-
SHROOM1	THAP9-AS1	0.372245	4.66e-15	0.833333	9.4e-06	3.07952	0.002073	#ERROR!
ADARB1	THAP9-AS1	0.066468	0.177069	-0.62982	0.003853	-3.07865	0.002079	0/-
SLC13A3	THAP9-AS1	0.207403	2.1e-05	0.769096	0.000119	3.0785	0.00208	#ERROR!
KRT7-AS	THAP9-AS1	0.365283	1.64e-14	0.830771	1.06e-05	3.07849	0.002081	#ERROR!
ASB16	THAP9-AS1	0.487786	0	-0.26766	0.267918	-3.07789	0.002085	#ERROR!
GPR171	THAP9-AS1	-0.04271	0.386034	0.64386	0.002931	3.07783	0.002085	0/+
PARD6B	THAP9-AS1	0.382613	6.66e-16	0.836842	7.95e-06	3.07763	0.002087	#ERROR!
PML	THAP9-AS1	0.087925	0.073927	0.714035	0.000595	3.07683	0.002092	0/+
GPR160	THAP9-AS1	0.310773	1.01e-10	0.810526	2.58e-05	3.07662	0.002094	#ERROR!
PLAUR	THAP9-AS1	-0.11878	0.015603	0.596491	0.007023	3.07611	0.002097	-/+
SLC9C1	THAP9-AS1	0.297943	6.21e-10	0.805483	3.16e-05	3.07514	0.002104	#ERROR!
SERPINB2	THAP9-AS1	-0.06896	0.161342	0.627744	0.004008	3.07507	0.002105	0/+
RAET1E-AS1	THAP9-AS1	0.111003	0.0239	0.725036	0.000444	3.07494	0.002105	#ERROR!
PRPF3	THAP9-AS1	0.522844	0	0.882456	5.76e-07	3.07416	0.002111	#ERROR!
MX2	THAP9-AS1	0.162995	0.000872	0.749123	0.000223	3.07407	0.002112	#ERROR!
KRT18P55	THAP9-AS1	0.191903	8.51e-05	0.761925	0.00015	3.07401	0.002112	#ERROR!
OR7E91P	THAP9-AS1	0.242715	5.78e-07	0.783299	7.3e-05	3.07293	0.00212	#ERROR!
MFSD12	THAP9-AS1	0.054212	0.271104	0.696491	0.000923	3.07292	0.00212	0/+
LRRC52	THAP9-AS1	0.032076	0.515146	-0.64919	0.002633	-3.07212	0.002125	0/-
NBEA	THAP9-AS1	0.179195	0.000248	-0.55439	0.013769	-3.0716	0.002129	#ERROR!
ITPK1	THAP9-AS1	0.114753	0.019515	-0.59825	0.006815	-3.07094	0.002134	#ERROR!
CMIP	THAP9-AS1	0.241193	6.83e-07	0.782456	7.52e-05	3.0708	0.002135	#ERROR!
FOLR1	THAP9-AS1	0.060389	0.220146	0.699257	0.000863	3.06984	0.002142	0/+
CCL15	THAP9-AS1	0.151616	0.001978	0.743411	0.000265	3.0694	0.002145	#ERROR!
CAPN9	THAP9-AS1	0.184533	0.000159	0.758016	0.00017	3.06786	0.002156	#ERROR!
ACAA1	THAP9-AS1	0.350553	2.05e-13	0.824561	1.41e-05	3.06773	0.002157	#ERROR!
POLR2J3	THAP9-AS1	0.237703	9.97e-07	0.780702	8e-05	3.06772	0.002157	#ERROR!
PPP6R1	THAP9-AS1	0.336389	2.07e-12	0.819298	1.78e-05	3.06711	0.002161	#ERROR!
ID3	THAP9-AS1	0.134314	0.006199	0.735088	0.000336	3.06677	0.002164	#ERROR!
HTR7	THAP9-AS1	-0.00289	0.953281	0.664912	0.001896	3.06631	0.002167	0/+
RASSF3	THAP9-AS1	0.094303	0.055204	-0.61053	0.005497	-3.06589	0.00217	0/-
ALDH1L1-AS1	THAP9-AS1	0.232021	1.82e-06	0.778053	8.77e-05	3.06494	0.002177	#ERROR!
POU5F1B	THAP9-AS1	0.307244	1.68e-10	0.808082	2.85e-05	3.06448	0.00218	#ERROR!
RAPGEFL1	THAP9-AS1	0.285191	3.45e-09	0.799474	4e-05	3.06392	0.002185	#ERROR!
LHX8	THAP9-AS1	0.140233	0.004252	0.737506	0.000314	3.06391	0.002185	#ERROR!
IQANK1	THAP9-AS1	0.379289	1.33e-15	0.834577	8.86e-06	3.06382	0.002185	#ERROR!
CBWD6	THAP9-AS1	0.485523	0	0.870175	1.28e-06	3.06311	0.002191	#ERROR!
CPNE4	THAP9-AS1	0.149239	0.002331	0.741553	0.000279	3.0629	0.002192	#ERROR!
LINC01018	THAP9-AS1	0.109477	0.025914	-0.60026	0.006582	-3.06258	0.002194	#ERROR!
PLCD4	THAP9-AS1	0.133634	0.006468	-0.58421	0.008625	-3.06179	0.0022	#ERROR!
CDK9	THAP9-AS1	0.337733	1.67e-12	0.819298	1.78e-05	3.06133	0.002204	#ERROR!
EHD3	THAP9-AS1	0.197961	4.99e-05	0.763158	0.000144	3.06124	0.002204	#ERROR!
BMP3	THAP9-AS1	0.273883	1.47e-08	0.794737	4.8e-05	3.06116	0.002205	#ERROR!
PDCD1	THAP9-AS1	-0.12016	0.014433	0.592982	0.007453	3.06074	0.002208	-/+
CYSRT1	THAP9-AS1	0.027504	0.576821	0.680702	0.001337	3.06042	0.00221	0/+
ALG2	THAP9-AS1	0.323889	1.45e-11	0.814035	2.23e-05	3.06034	0.002211	#ERROR!
MINK1	THAP9-AS1	0.323901	1.44e-11	0.814035	2.23e-05	3.06029	0.002211	#ERROR!
AHCYL2	THAP9-AS1	0.333386	3.33e-12	0.817544	1.92e-05	3.05974	0.002215	#ERROR!
CTRB2	THAP9-AS1	0.076737	0.119009	-0.62039	0.004597	-3.05893	0.002221	0/-
MYD88	THAP9-AS1	0.34814	3.06e-13	0.822807	1.52e-05	3.05741	0.002233	#ERROR!
EOLA2	THAP9-AS1	0.362584	2.62e-14	0.82807	1.2e-05	3.05736	0.002233	#ERROR!
ARHGAP26	THAP9-AS1	0.240317	7.51e-07	0.780702	8e-05	3.05716	0.002234	#ERROR!
ACSM6	THAP9-AS1	0.259788	8.22e-08	0.788573	6.03e-05	3.05606	0.002243	#ERROR!
GALNT1	THAP9-AS1	0.211596	1.41e-05	0.768421	0.000121	3.0555	0.002247	#ERROR!
KLHL3	THAP9-AS1	0.367946	1.02e-14	0.829825	1.11e-05	3.05515	0.002249	#ERROR!
SLC44A4	THAP9-AS1	0.266588	3.63e-08	0.791228	5.47e-05	3.05512	0.00225	#ERROR!
NUP62CL	THAP9-AS1	0.267018	3.45e-08	0.791393	5.44e-05	3.05504	0.00225	#ERROR!
LINC00319	THAP9-AS1	0.157972	0.001261	0.744633	0.000255	3.05501	0.00225	#ERROR!
FOXA1	THAP9-AS1	0.376361	2.22e-15	0.832821	9.63e-06	3.0549	0.002251	#ERROR!
PGBD1	THAP9-AS1	0.196667	5.6e-05	-0.5386	0.017351	-3.05481	0.002252	#ERROR!
FYB2	THAP9-AS1	0.207693	2.05e-05	0.766665	0.000129	3.05476	0.002252	#ERROR!
N4BP3	THAP9-AS1	0.164128	0.000802	0.747368	0.000235	3.05444	0.002255	#ERROR!
FRMPD2	THAP9-AS1	0.112858	0.021635	0.723251	0.000466	3.05347	0.002262	#ERROR!
IGIP	THAP9-AS1	0.338194	1.55e-12	-0.42105	0.072612	-3.05323	0.002264	#ERROR!
MPPED2	THAP9-AS1	0.199986	4.16e-05	0.763158	0.000144	3.0532	0.002264	#ERROR!
SHOC1	THAP9-AS1	0.130098	0.00804	0.731344	0.000374	3.05226	0.002271	#ERROR!
MGARP	THAP9-AS1	0.070456	0.152424	-0.62308	0.004374	-3.05161	0.002276	0/-
SLC17A5	THAP9-AS1	0.233287	1.6e-06	0.777193	9.04e-05	3.05153	0.002277	#ERROR!
LINC00943	THAP9-AS1	-0.07271	0.139726	0.621504	0.004503	3.05042	0.002285	0/+
NACC2	THAP9-AS1	0.061944	0.208476	-0.62807	0.003983	-3.05026	0.002286	0/-
SLC6A12	THAP9-AS1	0.045588	0.354835	0.688899	0.001106	3.05023	0.002287	0/+
CEP126	THAP9-AS1	0.286198	3.03e-09	-0.46667	0.043988	-3.05017	0.002287	#ERROR!
CTSH	THAP9-AS1	0.24207	6.2e-07	0.780702	8e-05	3.05006	0.002288	#ERROR!
PALM3	THAP9-AS1	0.195594	6.16e-05	0.76086	0.000155	3.04974	0.00229	#ERROR!
OXCT1	THAP9-AS1	0.061799	0.209542	-0.62807	0.003983	-3.04971	0.002291	0/-
KLHL29	THAP9-AS1	0.105938	0.031157	0.719298	0.000518	3.04877	0.002298	#ERROR!
BIRC2	THAP9-AS1	0.303688	2.79e-10	0.805263	3.19e-05	3.04868	0.002299	#ERROR!
LINC02889	THAP9-AS1	0.270346	2.29e-08	0.79209	5.3e-05	3.04848	0.0023	#ERROR!
SMAD7	THAP9-AS1	0.098943	0.044216	0.715789	0.000568	3.04814	0.002303	#ERROR!
NAPSB	THAP9-AS1	-0.11146	0.023325	0.596491	0.007023	3.04783	0.002305	-/+
NSUN7	THAP9-AS1	0.440428	0	0.854386	3.22e-06	3.04709	0.002311	#ERROR!
PRKCH	THAP9-AS1	0.247076	3.56e-07	0.782456	7.52e-05	3.04695	0.002312	#ERROR!
LOC107985040	THAP9-AS1	0.487869	0	0.869886	1.31e-06	3.04686	0.002312	#ERROR!
LOC101927708	THAP9-AS1	0.279853	6.91e-09	0.795728	4.62e-05	3.04678	0.002313	#ERROR!
ING5	THAP9-AS1	0.350688	2e-13	0.822807	1.52e-05	3.04635	0.002316	#ERROR!
IFT81	THAP9-AS1	0.388887	2.22e-16	-0.37018	0.118752	-3.04595	0.002319	#ERROR!
CTAGE15	THAP9-AS1	0.095083	0.053212	0.713488	0.000604	3.04507	0.002326	0/+
C11orf21	THAP9-AS1	-0.03394	0.491054	0.64386	0.002931	3.04433	0.002332	0/+
DSG2-AS1	THAP9-AS1	0.221494	5.37e-06	0.771274	0.00011	3.04261	0.002345	#ERROR!
HDAC6	THAP9-AS1	0.478737	0	0.866667	1.59e-06	3.04241	0.002347	#ERROR!
KMT5C	THAP9-AS1	0.462581	0	0.861404	2.17e-06	3.04235	0.002347	#ERROR!
CCDC28A-AS1	THAP9-AS1	0.329129	6.47e-12	0.814392	2.19e-05	3.04203	0.00235	#ERROR!
AHSA2P	THAP9-AS1	0.546278	0	0.887719	3.97e-07	3.0417	0.002352	#ERROR!
PTRHD1	THAP9-AS1	0.261481	6.72e-08	0.787719	6.23e-05	3.04055	0.002362	#ERROR!
GGT6	THAP9-AS1	0.28775	2.47e-09	0.798246	4.2e-05	3.04036	0.002363	#ERROR!
FAM107B	THAP9-AS1	0.195357	6.29e-05	0.759649	0.000161	3.03974	0.002368	#ERROR!
GTF3C2-AS1	THAP9-AS1	0.437564	0	0.852877	3.49e-06	3.03942	0.00237	#ERROR!
MYOM1	THAP9-AS1	0.109258	0.026216	-0.59649	0.007023	-3.03933	0.002371	#ERROR!
ADGRG1	THAP9-AS1	0.190611	9.52e-05	0.75735	0.000173	3.03789	0.002382	#ERROR!
ALDH1L1-AS2	THAP9-AS1	0.203886	2.92e-05	0.763158	0.000144	3.0377	0.002384	#ERROR!
CACNA1C	THAP9-AS1	-0.03346	0.497124	-0.6807	0.001337	-3.03768	0.002384	0/-
LOC100506725	THAP9-AS1	0.14966	0.002265	-0.56904	0.010999	-3.03751	0.002385	#ERROR!
CLDN1	THAP9-AS1	0.056715	0.249563	0.692982	0.001004	3.03749	0.002386	0/+
PRKAB2	THAP9-AS1	0.326819	9.24e-12	-0.42807	0.067488	-3.03711	0.002389	#ERROR!
LOC339874	THAP9-AS1	0.376507	2.22e-15	0.831431	1.03e-05	3.03702	0.002389	#ERROR!
CCDC68	THAP9-AS1	0.080928	0.100103	0.705263	0.000744	3.03633	0.002395	0/+
HPS4	THAP9-AS1	0.463828	0	0.861404	2.17e-06	3.0363	0.002395	#ERROR!
FBP2	THAP9-AS1	0.31666	4.28e-11	0.809127	2.73e-05	3.03623	0.002396	#ERROR!
LOC101927495	THAP9-AS1	0.175309	0.000338	0.750257	0.000216	3.03562	0.0024	#ERROR!
CASP4	THAP9-AS1	0.10235	0.03737	0.715789	0.000568	3.03502	0.002405	#ERROR!
NPAS1	THAP9-AS1	0.1981	4.93e-05	0.760316	0.000158	3.03488	0.002406	#ERROR!
RNF207	THAP9-AS1	0.45352	0	0.857895	2.65e-06	3.03482	0.002407	#ERROR!
SLC26A5	THAP9-AS1	0.466148	0	0.86204	2.09e-06	3.03444	0.00241	#ERROR!
FADS6	THAP9-AS1	0.130885	0.007664	0.729522	0.000393	3.03433	0.002411	#ERROR!
LINC01136	THAP9-AS1	0.183001	0.000181	0.753408	0.000196	3.03296	0.002422	#ERROR!
ITGAX	THAP9-AS1	-0.12879	0.008704	0.582456	0.008876	3.03286	0.002422	-/+
LECT2	THAP9-AS1	0.005656	0.908656	0.664697	0.001905	3.03228	0.002427	0/+
KRTAP1-1	THAP9-AS1	0.041409	0.400711	0.684163	0.001235	3.03205	0.002429	0/+
SLX1B	THAP9-AS1	0.158967	0.001173	0.742347	0.000273	3.03164	0.002432	#ERROR!
FRMD8	THAP9-AS1	0.289874	1.86e-09	0.798246	4.2e-05	3.03152	0.002433	#ERROR!
MAGI1-IT1	THAP9-AS1	0.300287	4.49e-10	0.80231	3.59e-05	3.03114	0.002436	#ERROR!
DUSP2	THAP9-AS1	0.255339	1.39e-07	0.784211	7.06e-05	3.03064	0.00244	#ERROR!
GUCA1C	THAP9-AS1	-0.03343	0.497514	0.642047	0.003039	3.03063	0.00244	0/+
LINC01996	THAP9-AS1	0.093791	0.056546	-0.60501	0.006061	-3.03055	0.002441	0/-
DKK3	THAP9-AS1	-0.12028	0.01433	0.587719	0.008139	3.03043	0.002442	-/+
LY6E	THAP9-AS1	-0.02122	0.666826	0.649123	0.002637	3.03029	0.002443	0/+
LAD1	THAP9-AS1	0.151286	0.002024	0.738596	0.000304	3.02999	0.002446	#ERROR!
CCNT2	THAP9-AS1	0.548466	0	0.887719	3.97e-07	3.0298	0.002447	#ERROR!
HES2	THAP9-AS1	-0.08848	0.072127	0.608162	0.005733	3.02915	0.002452	0/+
AGMO	THAP9-AS1	0.088911	0.070735	0.708205	0.000691	3.02809	0.002461	0/+
SHPK	THAP9-AS1	0.222583	4.81e-06	0.770175	0.000115	3.02793	0.002462	#ERROR!
RUNX3	THAP9-AS1	-0.11699	0.017249	0.589474	0.007905	3.02793	0.002462	-/+
EML6	THAP9-AS1	0.326865	9.18e-12	0.812281	2.39e-05	3.02791	0.002462	#ERROR!
LPXN	THAP9-AS1	0.083132	0.091161	0.705263	0.000744	3.02787	0.002463	0/+
LOC101929586	THAP9-AS1	0.170008	0.000513	-0.55286	0.014087	-3.02708	0.002469	#ERROR!
GOLGA8A	THAP9-AS1	0.481832	0	0.866667	1.59e-06	3.02707	0.002469	#ERROR!
PLD4	THAP9-AS1	-0.0879	0.074004	0.608162	0.005733	3.02694	0.00247	0/+
DSC3	THAP9-AS1	0.005176	0.916377	0.663449	0.001956	3.02559	0.002481	0/+
CD300LF	THAP9-AS1	-0.1925	8.08e-05	0.5362	0.017954	3.02548	0.002482	-/+
ETNK1	THAP9-AS1	0.461253	0	0.859649	2.4e-06	3.02301	0.002503	#ERROR!
CYBA	THAP9-AS1	0.067412	0.170984	0.696491	0.000923	3.02241	0.002508	0/+
AGR2	THAP9-AS1	0.273396	1.57e-08	0.790698	5.58e-05	3.02173	0.002513	#ERROR!
HLA-K	THAP9-AS1	0.207917	2e-05	0.763158	0.000144	3.02166	0.002514	#ERROR!
JHY	THAP9-AS1	0.1573	0.001323	0.740351	0.000289	3.02127	0.002517	#ERROR!
MEGF11	THAP9-AS1	0.332676	3.72e-12	0.813745	2.25e-05	3.01953	0.002532	#ERROR!
RDH13	THAP9-AS1	0.332217	4e-12	0.813515	2.27e-05	3.0189	0.002537	#ERROR!
PCDH1	THAP9-AS1	0.128221	0.009006	0.726316	0.000429	3.01866	0.002539	#ERROR!
KLHL41	THAP9-AS1	0.135142	0.005886	-0.57544	0.009941	-3.01727	0.002551	#ERROR!
RNF222	THAP9-AS1	0.152207	0.001898	0.737506	0.000314	3.01727	0.002551	#ERROR!
LINGO4	THAP9-AS1	0.070715	0.150922	0.697422	0.000903	3.01666	0.002556	0/+
MROCKI	THAP9-AS1	0.0634	0.197959	0.693591	0.00099	3.01639	0.002558	0/+
PHRF1	THAP9-AS1	0.41643	0	0.84386	5.61e-06	3.01527	0.002568	#ERROR!
PLA2G10	THAP9-AS1	0.212567	1.29e-05	0.76437	0.000139	3.01421	0.002577	#ERROR!
ARHGAP4	THAP9-AS1	-0.04328	0.379756	0.633333	0.003603	3.01223	0.002593	0/+
MAST4	THAP9-AS1	0.307859	1.54e-10	0.803509	3.42e-05	3.01219	0.002594	#ERROR!
LYSMD1	THAP9-AS1	0.487349	0	-0.25186	0.298242	-3.01114	0.002603	#ERROR!
MTSS1	THAP9-AS1	0.179209	0.000247	0.749123	0.000223	3.0104	0.002609	#ERROR!
RN7SL473P	THAP9-AS1	0.129026	0.00858	0.725677	0.000437	3.01039	0.002609	#ERROR!
MRAS	THAP9-AS1	-0.02194	0.656267	-0.67018	0.001691	-3.00786	0.002631	0/-
NUP88	THAP9-AS1	0.27812	8.63e-09	0.791228	5.47e-05	3.00764	0.002633	#ERROR!
RBM22	THAP9-AS1	0.33633	2.09e-12	0.814035	2.23e-05	3.00712	0.002637	#ERROR!
NEURL1	THAP9-AS1	0.014746	0.764836	-0.64912	0.002637	-3.0056	0.002651	0/-
RHPN2	THAP9-AS1	0.206754	2.24e-05	0.76086	0.000155	3.0054	0.002652	#ERROR!
B3GALT4	THAP9-AS1	0.161404	0.000981	0.740351	0.000289	3.00522	0.002654	#ERROR!
LBR	THAP9-AS1	0.235488	1.26e-06	-0.49934	0.029505	-3.00519	0.002654	#ERROR!
HBEGF	THAP9-AS1	-0.0413	0.401912	0.633333	0.003603	3.00469	0.002659	0/+
CFLAR	THAP9-AS1	0.253527	1.71e-07	0.780702	8e-05	3.00354	0.002669	#ERROR!
RIPK4	THAP9-AS1	0.292205	1.36e-09	0.796491	4.49e-05	3.00345	0.002669	#ERROR!
RNF150	THAP9-AS1	0.040841	0.407208	-0.63333	0.003603	-3.00292	0.002674	0/-
MIEF1	THAP9-AS1	0.296779	7.29e-10	0.798246	4.2e-05	3.00273	0.002676	#ERROR!
LOC100422204	THAP9-AS1	0.185939	0.000142	0.751236	0.000209	3.00229	0.00268	#ERROR!
CRYBG2	THAP9-AS1	0.17544	0.000335	0.746375	0.000242	3.00148	0.002687	#ERROR!
MIR4664	THAP9-AS1	0.263912	5.02e-08	0.784797	6.92e-05	3.00142	0.002687	#ERROR!
AGBL5-AS1	THAP9-AS1	0.195902	6e-05	-0.52897	0.019875	-3.00045	0.002696	#ERROR!
FAM183A	THAP9-AS1	0.292963	1.23e-09	0.796483	4.49e-05	3.00022	0.002698	#ERROR!
B4GALT1	THAP9-AS1	0.1819	0.000198	0.749123	0.000223	2.9998	0.002702	#ERROR!
MIR6730	THAP9-AS1	0.240194	7.61e-07	0.774691	9.84e-05	2.99968	0.002703	#ERROR!
PPP2R3A	THAP9-AS1	0.120217	0.014384	-0.58246	0.008876	-2.99967	0.002703	#ERROR!
FOXI2	THAP9-AS1	0.083072	0.091398	0.701493	0.000817	2.99966	0.002703	0/+
CDC42BPA	THAP9-AS1	0.21072	1.54e-05	-0.51754	0.023238	-2.99941	0.002705	#ERROR!
GPAM	THAP9-AS1	0.32253	1.78e-11	-0.42387	0.070521	-2.99927	0.002706	#ERROR!
PHLDB3	THAP9-AS1	0.29765	6.47e-10	0.798246	4.2e-05	2.99908	0.002708	#ERROR!
QPCT	THAP9-AS1	0.166956	0.000648	0.742105	0.000275	2.99831	0.002715	#ERROR!
KRT39	THAP9-AS1	-0.01036	0.833541	0.650533	0.002562	2.99818	0.002716	0/+
LOC101929494	THAP9-AS1	0.070379	0.152875	0.694737	0.000963	2.99809	0.002717	0/+
GNG13	THAP9-AS1	0.278125	8.62e-09	0.790275	5.67e-05	2.99793	0.002718	#ERROR!
GBGT1	THAP9-AS1	-0.04483	0.362926	0.630101	0.003833	2.99764	0.002721	0/+
CDH1	THAP9-AS1	0.306916	1.76e-10	0.801754	3.66e-05	2.99736	0.002723	#ERROR!
HOXD3	THAP9-AS1	0.166405	0.000675	0.741553	0.000279	2.99579	0.002737	#ERROR!
LTB4R2	THAP9-AS1	0.297117	6.96e-10	0.797718	4.29e-05	2.99578	0.002737	#ERROR!
LINC01063	THAP9-AS1	0.100755	0.040454	-0.59463	0.007249	-2.99556	0.002739	#ERROR!
IFI44	THAP9-AS1	0.067772	0.168705	0.692982	0.001004	2.99518	0.002743	0/+
AGAP3	THAP9-AS1	0.303132	3.02e-10	0.8	3.92e-05	2.99462	0.002748	#ERROR!
RGPD8	THAP9-AS1	0.330608	5.14e-12	-0.41509	0.077185	-2.99315	0.002761	#ERROR!
GALNT5	THAP9-AS1	-0.02345	0.634312	0.642105	0.003035	2.9929	0.002763	0/+
LOC101928058	THAP9-AS1	0.154221	0.001648	0.73546	0.000333	2.99237	0.002768	#ERROR!
LY6K	THAP9-AS1	-0.00805	0.870213	0.650877	0.002544	2.99167	0.002775	0/+
DGKG	THAP9-AS1	0.085905	0.080838	-0.60351	0.006222	-2.99125	0.002778	0/-
PROC	THAP9-AS1	0.040561	0.410427	0.677859	0.001426	2.99047	0.002785	0/+
NEK7	THAP9-AS1	0.237613	1.01e-06	-0.49474	0.031283	-2.99046	0.002786	#ERROR!
HK2	THAP9-AS1	0.340265	1.11e-12	0.814035	2.23e-05	2.99018	0.002788	#ERROR!
ALG9	THAP9-AS1	0.292046	1.39e-09	-0.44912	0.053732	-2.98988	0.002791	#ERROR!
MCOLN3	THAP9-AS1	0.110018	0.025184	0.713784	0.000599	2.98983	0.002791	#ERROR!
ARHGAP10	THAP9-AS1	0.20829	1.94e-05	-0.51754	0.023238	-2.98972	0.002792	#ERROR!
PPP4R1-AS1	THAP9-AS1	0.218247	7.42e-06	0.764153	0.00014	2.98951	0.002794	#ERROR!
ALAS1	THAP9-AS1	0.340515	1.07e-12	0.814035	2.23e-05	2.9891	0.002798	#ERROR!
GRAMD4P8	THAP9-AS1	0.188466	0.000114	-0.5323	0.018969	-2.98872	0.002801	#ERROR!
AIFM3	THAP9-AS1	0.261444	6.75e-08	0.782456	7.52e-05	2.9884	0.002804	#ERROR!
CEP95	THAP9-AS1	0.579347	0	0.894737	2.35e-07	2.98722	0.002815	#ERROR!
RTN4RL1	THAP9-AS1	0.060519	0.219156	0.688021	0.001129	2.9868	0.002819	0/+
CCSER2	THAP9-AS1	0.195988	5.95e-05	-0.52632	0.020619	-2.98679	0.002819	#ERROR!
MALL	THAP9-AS1	0.018781	0.703186	0.665204	0.001884	2.9857	0.002829	0/+
NR1H3	THAP9-AS1	0.151725	0.001963	0.733333	0.000353	2.98451	0.00284	#ERROR!
PSCA	THAP9-AS1	0.201763	3.54e-05	0.75614	0.00018	2.98289	0.002855	#ERROR!
DDTL	THAP9-AS1	0.424602	0	0.84423	5.5e-06	2.98234	0.002861	#ERROR!
SLPI	THAP9-AS1	0.012999	0.792006	0.661404	0.002043	2.98188	0.002865	0/+
LINC00894	THAP9-AS1	0.45337	0	0.854131	3.26e-06	2.98186	0.002865	#ERROR!
AGPAT3	THAP9-AS1	0.370208	6.66e-15	0.824561	1.41e-05	2.98163	0.002867	#ERROR!
RPRD1A	THAP9-AS1	0.437244	0	-0.30351	0.206516	-2.98147	0.002869	#ERROR!
NOTCH1	THAP9-AS1	0.095288	0.052701	0.705263	0.000744	2.98117	0.002872	0/+
C10orf99	THAP9-AS1	0.159208	0.001153	0.736381	0.000324	2.98054	0.002877	#ERROR!
KRTAP5-10	THAP9-AS1	0.317768	3.63e-11	0.804398	3.3e-05	2.9799	0.002883	#ERROR!
KRT16P3	THAP9-AS1	0.059633	0.225987	0.686592	0.001168	2.97987	0.002884	0/+
RACK1	THAP9-AS1	0.255392	1.38e-07	0.778947	8.5e-05	2.97887	0.002893	#ERROR!
ARHGEF5	THAP9-AS1	0.214665	1.05e-05	0.761404	0.000153	2.97877	0.002894	#ERROR!
GFI1	THAP9-AS1	0.035121	0.476058	0.673102	0.001586	2.97789	0.002902	0/+
ERN2	THAP9-AS1	0.164327	0.00079	0.738367	0.000306	2.97709	0.00291	#ERROR!
RN7SL208P	THAP9-AS1	0.152725	0.001831	0.732817	0.000359	2.97636	0.002917	#ERROR!
SLC44A3-AS1	THAP9-AS1	0.336286	2.1e-12	0.811238	2.5e-05	2.97592	0.002921	#ERROR!
CABLES1	THAP9-AS1	0.082979	0.091761	0.698246	0.000885	2.97576	0.002923	0/+
FAM83C	THAP9-AS1	0.150951	0.002072	0.7319	0.000368	2.97574	0.002923	#ERROR!
AQP3	THAP9-AS1	0.156636	0.001388	0.734533	0.000342	2.97525	0.002928	#ERROR!
ADIPOR1	THAP9-AS1	0.339293	1.3e-12	0.812281	2.39e-05	2.97463	0.002933	#ERROR!
NFIC	THAP9-AS1	0.108424	0.027388	-0.58596	0.008379	-2.97443	0.002935	#ERROR!
GZMH	THAP9-AS1	-0.11454	0.019741	0.581834	0.008966	2.97416	0.002938	-/+
C2CD4D	THAP9-AS1	0.318888	3.07e-11	0.804244	3.32e-05	2.9735	0.002944	#ERROR!
RPAIN	THAP9-AS1	0.519641	0	0.875439	9.19e-07	2.97329	0.002946	#ERROR!
PTPN22	THAP9-AS1	-0.05317	0.280398	0.621053	0.004541	2.97287	0.00295	0/+
MROH6	THAP9-AS1	0.137828	0.004965	0.725198	0.000442	2.97238	0.002955	#ERROR!
MEG3	THAP9-AS1	-0.0587	0.23337	0.617544	0.004843	2.97229	0.002956	0/+
SBSPON	THAP9-AS1	0.078207	0.112085	-0.60526	0.006034	-2.97225	0.002956	0/-
CDHR1	THAP9-AS1	0.079006	0.108452	0.695693	0.000941	2.97208	0.002958	0/+
CD207	THAP9-AS1	0.115799	0.018425	0.714348	0.00059	2.9719	0.00296	#ERROR!
ITGB2-AS1	THAP9-AS1	-0.0863	0.079437	0.6	0.006612	2.97182	0.00296	0/+
HHAT	THAP9-AS1	0.30072	4.23e-10	0.796841	4.43e-05	2.97152	0.002963	#ERROR!
CEACAM16	THAP9-AS1	-0.00275	0.95546	0.650864	0.002545	2.97138	0.002965	0/+
NCKAP5	THAP9-AS1	0.117852	0.016438	0.715226	0.000577	2.97081	0.00297	#ERROR!
SH3TC2-DT	THAP9-AS1	0.182906	0.000183	0.746219	0.000243	2.97073	0.002971	#ERROR!
SFTA1P	THAP9-AS1	-0.16013	0.001078	0.54939	0.014831	2.96938	0.002984	-/+
CREBZF	THAP9-AS1	0.514979	0	0.873684	1.03e-06	2.96911	0.002987	#ERROR!
NALCN-AS1	THAP9-AS1	0.068459	0.164423	0.68964	0.001087	2.96815	0.002996	0/+
DNAJC24	THAP9-AS1	0.344507	5.58e-13	-0.39649	0.092834	-2.96805	0.002997	#ERROR!
PRRG4	THAP9-AS1	0.287688	2.49e-09	0.791228	5.47e-05	2.968	0.002997	#ERROR!
CAVIN4	THAP9-AS1	0.176976	0.000296	-0.53674	0.017817	-2.96708	0.003006	#ERROR!
HOTAIRM1	THAP9-AS1	0.2768	1.02e-08	0.786655	6.47e-05	2.96693	0.003008	#ERROR!
KRTAP29-1	THAP9-AS1	0.130007	0.008085	0.7207	0.000499	2.96681	0.003009	#ERROR!
PPIEL	THAP9-AS1	0.19186	8.55e-05	0.749787	0.000219	2.96624	0.003015	#ERROR!
MIOS	THAP9-AS1	0.387958	2.22e-16	0.829825	1.11e-05	2.96615	0.003016	#ERROR!
C11orf1	THAP9-AS1	0.296791	7.28e-10	0.794737	4.8e-05	2.96609	0.003016	#ERROR!
SLC34A3	THAP9-AS1	0.200715	3.9e-05	0.753765	0.000194	2.96601	0.003017	#ERROR!
MAP6D1	THAP9-AS1	0.268585	2.85e-08	0.783143	7.34e-05	2.96589	0.003018	#ERROR!
MPG	THAP9-AS1	0.127396	0.009462	0.719298	0.000518	2.96584	0.003019	#ERROR!
PARP10	THAP9-AS1	0.19844	4.78e-05	0.752632	0.000201	2.96505	0.003026	#ERROR!
SLC25A45	THAP9-AS1	0.082996	0.091694	0.696797	0.000916	2.96494	0.003027	0/+
CEACAM1	THAP9-AS1	0.194914	6.54e-05	0.750877	0.000212	2.96365	0.00304	#ERROR!
GOLT1A	THAP9-AS1	0.270817	2.16e-08	0.783832	7.16e-05	2.96352	0.003041	#ERROR!
RERE	THAP9-AS1	0.445603	0	-0.28947	0.229335	-2.96239	0.003053	#ERROR!
CAPNS2	THAP9-AS1	0.116683	0.017545	0.713534	0.000603	2.96215	0.003055	#ERROR!
ACADVL	THAP9-AS1	0.403475	0	0.835088	8.65e-06	2.96137	0.003063	#ERROR!
LOC100506258	THAP9-AS1	0.385343	4.44e-16	0.828434	1.18e-05	2.96091	0.003067	#ERROR!
MVP	THAP9-AS1	0.060219	0.221449	0.684211	0.001234	2.9605	0.003071	0/+
PICSAR	THAP9-AS1	-0.05525	0.262043	-0.6815	0.001313	-2.96016	0.003075	0/-
MAST2	THAP9-AS1	0.290897	1.62e-09	-0.44386	0.056952	-2.96003	0.003076	#ERROR!
MGAT4B	THAP9-AS1	0.281176	5.83e-09	0.787719	6.23e-05	2.9595	0.003081	#ERROR!
NISCH	THAP9-AS1	0.433457	0	0.845614	5.13e-06	2.95941	0.003082	#ERROR!
PI4K2A	THAP9-AS1	0.083956	0.087988	0.696491	0.000923	2.95899	0.003087	0/+
FOXN3	THAP9-AS1	0.209222	1.77e-05	-0.51053	0.025516	-2.95708	0.003106	#ERROR!
LOC100506098	THAP9-AS1	0.249449	2.72e-07	0.774114	0.0001	2.95666	0.00311	#ERROR!
MIR6867	THAP9-AS1	0.249674	2.65e-07	0.774187	0.0001	2.95644	0.003112	#ERROR!
LLGL2	THAP9-AS1	0.385511	4.44e-16	0.82807	1.2e-05	2.95575	0.003119	#ERROR!
HNF1B	THAP9-AS1	0.243419	5.35e-07	0.771274	0.00011	2.95426	0.003134	#ERROR!
SLC49A4	THAP9-AS1	0.318017	3.5e-11	0.802106	3.61e-05	2.95423	0.003134	#ERROR!
LINC02762	THAP9-AS1	0.00827	0.866767	-0.64502	0.002864	-2.95401	0.003137	0/-
C3orf49	THAP9-AS1	0.258828	9.21e-08	-0.46998	0.042312	-2.95362	0.003141	#ERROR!
NKPD1	THAP9-AS1	0.286869	2.77e-09	0.789452	5.84e-05	2.95337	0.003143	#ERROR!
CCDC130	THAP9-AS1	0.507222	0	0.870175	1.28e-06	2.95335	0.003143	#ERROR!
SH3YL1	THAP9-AS1	0.486021	0	0.863158	1.96e-06	2.95313	0.003146	#ERROR!
OCRL	THAP9-AS1	0.454266	0	-0.27719	0.250589	-2.9529	0.003148	#ERROR!
LPL	THAP9-AS1	-0.00836	0.865299	-0.65439	0.002367	-2.95239	0.003153	0/-
NT5C2	THAP9-AS1	0.326445	9.79e-12	0.805263	3.19e-05	2.95236	0.003153	#ERROR!
DLX4	THAP9-AS1	0.153692	0.001711	0.730316	0.000385	2.95207	0.003157	#ERROR!
ATP10D	THAP9-AS1	0.141855	0.003825	0.724561	0.00045	2.95161	0.003161	#ERROR!
JMY	THAP9-AS1	0.401664	0	-0.33509	0.160799	-2.95091	0.003168	#ERROR!
FLT3	THAP9-AS1	-0.08184	0.096309	0.599298	0.006693	2.95052	0.003172	0/+
DNMBP-AS1	THAP9-AS1	0.226165	3.35e-06	0.763341	0.000143	2.95033	0.003174	#ERROR!
PLPP6	THAP9-AS1	0.354122	1.12e-13	0.815789	2.07e-05	2.95003	0.003177	#ERROR!
LINC02266	THAP9-AS1	0.168345	0.000583	0.736848	0.00032	2.94864	0.003192	#ERROR!
B3GNTL1P1	THAP9-AS1	0.017257	0.726276	-0.63886	0.003236	-2.94835	0.003195	0/-
NT5DC3	THAP9-AS1	0.112146	0.022482	-0.57895	0.009396	-2.94831	0.003195	#ERROR!
NAGS	THAP9-AS1	0.105053	0.032601	0.705883	0.000733	2.94827	0.003196	#ERROR!
ENTPD1	THAP9-AS1	0.014679	0.765862	-0.64035	0.003142	-2.94812	0.003197	0/-
MAP3K9	THAP9-AS1	0.326261	1.01e-11	0.804739	3.26e-05	2.94747	0.003204	#ERROR!
PARD6G-AS1	THAP9-AS1	0.275994	1.13e-08	0.784366	7.03e-05	2.94747	0.003204	#ERROR!
CYTH1	THAP9-AS1	0.214612	1.06e-05	0.757895	0.00017	2.94736	0.003205	#ERROR!
DAPL1	THAP9-AS1	0.076007	0.122571	0.690686	0.001061	2.94684	0.00321	0/+
SAMD9	THAP9-AS1	0.063793	0.195183	0.684211	0.001234	2.94683	0.003211	0/+
CCDC107	THAP9-AS1	0.112566	0.021979	-0.57832	0.009491	-2.94636	0.003215	#ERROR!
MCOLN2	THAP9-AS1	0.029767	0.545865	0.665496	0.001872	2.9458	0.003221	0/+
MAGEL2	THAP9-AS1	-0.09407	0.055812	0.590511	0.007769	2.94564	0.003223	0/+
ASCL2	THAP9-AS1	0.177314	0.000288	0.740676	0.000287	2.94552	0.003224	#ERROR!
NIPAL2	THAP9-AS1	0.350654	2.02e-13	0.814035	2.23e-05	2.94522	0.003227	#ERROR!
NLRP6	THAP9-AS1	0.056194	0.253944	0.679842	0.001363	2.94477	0.003232	0/+
AZGP1	THAP9-AS1	0.219312	6.68e-06	0.759649	0.000161	2.94432	0.003237	#ERROR!
MSRA	THAP9-AS1	0.064482	0.190392	0.684211	0.001234	2.94419	0.003238	0/+
CCR2	THAP9-AS1	-0.1787	0.000258	0.531168	0.019274	2.94418	0.003238	-/+
NBPF1	THAP9-AS1	0.386729	4.44e-16	-0.34912	0.142909	-2.9441	0.003239	#ERROR!
CRACR2B	THAP9-AS1	0.319526	2.79e-11	0.801754	3.66e-05	2.94407	0.003239	#ERROR!
CALM1	THAP9-AS1	0.163581	0.000835	-0.54211	0.016497	-2.94335	0.003247	#ERROR!
LINC02535	THAP9-AS1	0.073862	0.133516	0.689063	0.001102	2.94326	0.003248	0/+
FAM83D	THAP9-AS1	0.086848	0.077548	-0.59474	0.007235	-2.94272	0.003253	0/-
CDK18	THAP9-AS1	0.374565	3.11e-15	0.822807	1.52e-05	2.94155	0.003266	#ERROR!
DUOX1	THAP9-AS1	0.302666	3.22e-10	0.794737	4.8e-05	2.94149	0.003266	#ERROR!
SLC1A5	THAP9-AS1	0.140892	0.004074	0.722807	0.000472	2.94131	0.003268	#ERROR!
S100A3	THAP9-AS1	-0.02806	0.569167	0.631256	0.003749	2.94095	0.003272	0/+
EPHB1	THAP9-AS1	-0.07206	0.143267	-0.68772	0.001137	-2.94042	0.003278	0/-
KLHL17	THAP9-AS1	0.325077	1.21e-11	0.803509	3.42e-05	2.93925	0.00329	#ERROR!
DNAJB2	THAP9-AS1	0.240661	7.24e-07	0.768421	0.000121	2.93873	0.003296	#ERROR!
OPN3	THAP9-AS1	0.193101	7.67e-05	0.747147	0.000237	2.93844	0.003299	#ERROR!
MYO3B	THAP9-AS1	0.123827	0.011682	0.714035	0.000595	2.93842	0.003299	#ERROR!
B3GNT5	THAP9-AS1	0.224793	3.85e-06	0.761404	0.000153	2.93821	0.003301	#ERROR!
PLD2	THAP9-AS1	0.338701	1.43e-12	0.808772	2.77e-05	2.93819	0.003301	#ERROR!
M1AP	THAP9-AS1	0.00101	0.983646	0.647914	0.002702	2.93758	0.003308	0/+
KRT8P47	THAP9-AS1	-0.01429	0.771846	-0.65548	0.002314	-2.93709	0.003313	0/-
CARD19	THAP9-AS1	0.163963	0.000812	0.733333	0.000353	2.93667	0.003318	#ERROR!
RNA5SP393	THAP9-AS1	0.096022	0.050894	0.69972	0.000853	2.93662	0.003318	0/+
NCEH1	THAP9-AS1	0.185242	0.00015	0.743309	0.000265	2.93661	0.003318	#ERROR!
B3GAT1	THAP9-AS1	0.061631	0.210788	0.681621	0.001309	2.9366	0.003318	0/+
OR2A7	THAP9-AS1	0.308617	1.38e-10	0.796661	4.46e-05	2.93646	0.00332	#ERROR!
NLRP3	THAP9-AS1	-0.17139	0.000461	0.535088	0.018239	2.93629	0.003322	-/+
ASH1L	THAP9-AS1	0.408073	0	-0.32456	0.175186	-2.93511	0.003334	#ERROR!
SLC27A6	THAP9-AS1	0.157771	0.001279	0.730145	0.000386	2.93474	0.003338	#ERROR!
GPR156	THAP9-AS1	0.055534	0.259573	-0.61336	0.005225	-2.93451	0.003341	0/-
C1orf216	THAP9-AS1	0.09274	0.059383	-0.58947	0.007905	-2.93447	0.003341	0/-
CASC8	THAP9-AS1	0.040822	0.407427	0.669592	0.001713	2.93177	0.00337	0/+
HS3ST1	THAP9-AS1	0.275265	1.24e-08	0.782456	7.52e-05	2.93163	0.003372	#ERROR!
DOCK10	THAP9-AS1	-0.10776	0.028356	0.578947	0.009396	2.93138	0.003375	-/+
LINC02408	THAP9-AS1	0.129816	0.008179	0.716083	0.000564	2.93119	0.003377	#ERROR!
PPP4R3A	THAP9-AS1	0.474879	0	0.857895	2.65e-06	2.93103	0.003378	#ERROR!
HMGA1	THAP9-AS1	0.077879	0.1136	0.689474	0.001091	2.93084	0.00338	0/+
SGK1	THAP9-AS1	0.026445	0.59158	0.661404	0.002043	2.93061	0.003383	0/+
MYO1E	THAP9-AS1	0.055155	0.262842	0.677193	0.001448	2.93002	0.003389	0/+
PLIN5	THAP9-AS1	0.323053	1.64e-11	0.801754	3.66e-05	2.92908	0.0034	#ERROR!
KCNN2	THAP9-AS1	0.112224	0.022387	-0.57544	0.009941	-2.92856	0.003405	#ERROR!
IL25	THAP9-AS1	0.147013	0.002713	0.724051	0.000456	2.92744	0.003418	#ERROR!
NXNL2	THAP9-AS1	0.140137	0.004279	0.720637	0.0005	2.92699	0.003423	#ERROR!
MSH5	THAP9-AS1	0.501501	0	0.86655	1.6e-06	2.9264	0.003429	#ERROR!
HOXB-AS3	THAP9-AS1	0.289858	1.86e-09	0.788006	6.16e-05	2.92635	0.00343	#ERROR!
SFT2D1	THAP9-AS1	0.32853	7.1e-12	0.803509	3.42e-05	2.92452	0.00345	#ERROR!
RN7SKP116	THAP9-AS1	0.256831	1.16e-07	0.773841	0.000101	2.924	0.003456	#ERROR!
RAB43	THAP9-AS1	0.22532	3.65e-06	0.759983	0.00016	2.92324	0.003464	#ERROR!
LINC01433	THAP9-AS1	0.085437	0.08251	0.692308	0.001021	2.92251	0.003472	0/+
LINC02345	THAP9-AS1	-0.15894	0.001176	0.541533	0.016634	2.92209	0.003477	-/+
ARHGAP23	THAP9-AS1	0.33798	1.61e-12	0.807018	2.97e-05	2.92204	0.003477	#ERROR!
ATP6V0C	THAP9-AS1	0.285982	3.11e-09	0.785965	6.63e-05	2.92203	0.003478	#ERROR!
PTGR1	THAP9-AS1	0.149459	0.002296	0.724561	0.00045	2.922	0.003478	#ERROR!
CCDC102A	THAP9-AS1	-0.0607	0.217739	-0.67895	0.001391	-2.92118	0.003487	0/-
KRT8P41	THAP9-AS1	0.217506	7.98e-06	0.756244	0.000179	2.92105	0.003489	#ERROR!
FASLG	THAP9-AS1	-0.04395	0.372413	0.618358	0.004772	2.92095	0.00349	0/+
DUS3L	THAP9-AS1	0.299027	5.35e-10	0.791228	5.47e-05	2.92071	0.003492	#ERROR!
KCNK7	THAP9-AS1	0.070167	0.154118	0.683934	0.001242	2.92043	0.003495	0/+
AGRN	THAP9-AS1	0.27799	8.77e-09	0.782456	7.52e-05	2.92038	0.003496	#ERROR!
SEMA3A	THAP9-AS1	-0.07076	0.150646	-0.68421	0.001234	-2.92014	0.003499	0/-
KCTD1	THAP9-AS1	0.097795	0.046747	0.698246	0.000885	2.91882	0.003514	#ERROR!
EML5	THAP9-AS1	0.179147	0.000249	-0.5259	0.020737	-2.91806	0.003522	#ERROR!
OVGP1	THAP9-AS1	0.375279	2.66e-15	0.821053	1.65e-05	2.91777	0.003525	#ERROR!
PTBP3	THAP9-AS1	0.321355	2.12e-11	0.8	3.92e-05	2.91765	0.003527	#ERROR!
LETM1P1	THAP9-AS1	0.081869	0.096203	-0.59369	0.007365	-2.91741	0.003529	0/-
HCCS	THAP9-AS1	0.258879	9.15e-08	0.774024	0.000101	2.91737	0.00353	#ERROR!
IZUMO1	THAP9-AS1	0.129078	0.008553	0.71394	0.000596	2.91734	0.00353	#ERROR!
LRRC7	THAP9-AS1	0.378673	1.33e-15	-0.35103	0.140589	-2.91641	0.003541	#ERROR!
ARHGAP30	THAP9-AS1	0.091681	0.062362	0.694737	0.000963	2.91636	0.003541	0/+
SLC29A3	THAP9-AS1	0.242215	6.1e-07	0.766667	0.000129	2.91617	0.003544	#ERROR!
ADAMTSL5	THAP9-AS1	0.112318	0.022274	0.705263	0.000744	2.91554	0.003551	#ERROR!
PIWIL1	THAP9-AS1	0.024579	0.618014	0.658117	0.00219	2.91554	0.003551	0/+
IRF5	THAP9-AS1	0.275147	1.26e-08	0.780702	8e-05	2.91493	0.003558	#ERROR!
CDC42SE2	THAP9-AS1	0.300438	4.4e-10	0.791228	5.47e-05	2.9148	0.003559	#ERROR!
LHFPL4	THAP9-AS1	0.105977	0.031094	0.701797	0.000811	2.91385	0.00357	#ERROR!
CLEC12A	THAP9-AS1	-0.00769	0.875993	0.639157	0.003217	2.91379	0.003571	0/+
ANKS1B	THAP9-AS1	0.052776	0.28402	-0.61167	0.005386	-2.91368	0.003572	0/-
DNASE1L1	THAP9-AS1	0.238893	8.77e-07	0.764912	0.000136	2.91344	0.003575	#ERROR!
HLA-DQB1-AS1	THAP9-AS1	-0.04055	0.410555	0.619236	0.004696	2.9134	0.003575	0/+
LARGE1	THAP9-AS1	0.290297	1.76e-09	-0.4344	0.063102	-2.91287	0.003581	#ERROR!
APOBEC3D	THAP9-AS1	0.253888	1.64e-07	0.771391	0.00011	2.91283	0.003582	#ERROR!
CAPN14	THAP9-AS1	0.264123	4.9e-08	0.775779	9.49e-05	2.91266	0.003584	#ERROR!
HECTD2	THAP9-AS1	0.374313	3.11e-15	-0.35439	0.136573	-2.91165	0.003595	#ERROR!
SCAMP4	THAP9-AS1	0.336076	2.18e-12	0.805263	3.19e-05	2.91113	0.003601	#ERROR!
MED31	THAP9-AS1	0.408435	0	0.832821	9.63e-06	2.91037	0.00361	#ERROR!
KRT6A	THAP9-AS1	-0.04179	0.396414	0.617962	0.004807	2.91025	0.003611	0/+
LUC7L3	THAP9-AS1	0.57563	0	0.889474	3.5e-07	2.91019	0.003612	#ERROR!
FBXL22	THAP9-AS1	0.022322	0.650644	-0.62982	0.003853	-2.91001	0.003614	0/-
HSH2D	THAP9-AS1	0.276377	1.08e-08	0.780702	8e-05	2.90986	0.003616	#ERROR!
DDB2	THAP9-AS1	0.185673	0.000145	0.740351	0.000289	2.90983	0.003616	#ERROR!
PAGR1	THAP9-AS1	0.348549	2.86e-13	0.810004	2.63e-05	2.90925	0.003623	#ERROR!
FBXO34	THAP9-AS1	0.419864	0	0.836842	7.95e-06	2.90835	0.003633	#ERROR!
PCDH20	THAP9-AS1	-0.00416	0.932791	-0.64525	0.002851	-2.90815	0.003636	0/-
LINC01588	THAP9-AS1	0.145849	0.002934	0.721053	0.000495	2.90806	0.003637	#ERROR!
PIGN	THAP9-AS1	0.336803	1.94e-12	0.805263	3.19e-05	2.90801	0.003637	#ERROR!
BCL2L14	THAP9-AS1	0.250192	2.5e-07	0.769233	0.000118	2.90764	0.003642	#ERROR!
DSG3	THAP9-AS1	-0.04433	0.368294	0.615953	0.004986	2.9076	0.003642	0/+
IL18RAP	THAP9-AS1	-0.01087	0.825425	0.636244	0.003405	2.9072	0.003647	0/+
CAPN12	THAP9-AS1	0.28703	2.71e-09	0.784899	6.89e-05	2.90707	0.003648	#ERROR!
NEK8	THAP9-AS1	0.359439	4.53e-14	0.814035	2.23e-05	2.9069	0.00365	#ERROR!
KCTD11	THAP9-AS1	0.273014	1.64e-08	0.778947	8.5e-05	2.90666	0.003653	#ERROR!
CASC2	THAP9-AS1	0.383445	4.44e-16	-0.34386	0.149447	-2.9066	0.003654	#ERROR!
CMTM7	THAP9-AS1	0.120743	0.013958	0.708205	0.000691	2.90539	0.003668	#ERROR!
CCDC74A	THAP9-AS1	0.108733	0.026949	-0.57368	0.010223	-2.9051	0.003671	#ERROR!
CARD6	THAP9-AS1	0.194467	6.81e-05	0.74386	0.000261	2.90483	0.003675	#ERROR!
AARD	THAP9-AS1	-0.13179	0.007249	-0.71353	0.000603	-2.90365	0.003688	-/-
RRP7BP	THAP9-AS1	0.450418	0	0.847368	4.68e-06	2.90266	0.0037	#ERROR!
CEBPE	THAP9-AS1	-0.26132	6.85e-08	0.457363	0.04897	2.90256	0.003701	-/+
BCL2L2	THAP9-AS1	0.256248	1.25e-07	-0.4614	0.046756	-2.90136	0.003715	#ERROR!
ADORA2B	THAP9-AS1	0.092696	0.059505	0.692982	0.001004	2.89956	0.003737	0/+
RBFOX3	THAP9-AS1	0.042479	0.388636	-0.61579	0.005001	-2.89952	0.003737	0/-
PCP2	THAP9-AS1	0.433027	0	0.840909	6.51e-06	2.89935	0.003739	#ERROR!
ADGRF1	THAP9-AS1	0.299199	5.22e-10	0.789105	5.92e-05	2.89845	0.00375	#ERROR!
KRT18P11	THAP9-AS1	0.153467	0.001738	0.723565	0.000462	2.89838	0.003751	#ERROR!
PLK3	THAP9-AS1	0.063455	0.19757	0.677193	0.001448	2.89827	0.003752	0/+
BGLAP	THAP9-AS1	0.423313	0	0.837294	7.77e-06	2.89812	0.003754	#ERROR!
LINC01482	THAP9-AS1	-0.02984	0.54485	0.62312	0.00437	2.89663	0.003772	0/+
RBSN	THAP9-AS1	0.384582	4.44e-16	-0.34035	0.153919	-2.89654	0.003773	#ERROR!
ADRA1D	THAP9-AS1	-0.13936	0.004501	0.550877	0.014508	2.89651	0.003773	-/+
CXADR	THAP9-AS1	0.357324	6.51e-14	0.812281	2.39e-05	2.89641	0.003775	#ERROR!
LYPLA1	THAP9-AS1	0.38028	1.11e-15	0.821053	1.65e-05	2.89554	0.003785	#ERROR!
NACC1	THAP9-AS1	0.292434	1.32e-09	0.785965	6.63e-05	2.89519	0.003789	#ERROR!
CHP2	THAP9-AS1	0.202222	3.4e-05	0.746269	0.000243	2.8947	0.003795	#ERROR!
MAPK4	THAP9-AS1	0.100788	0.040389	-0.57719	0.009665	-2.89447	0.003798	#ERROR!
GSTK1	THAP9-AS1	0.280366	6.47e-09	0.780702	8e-05	2.89338	0.003811	#ERROR!
DMKN	THAP9-AS1	0.07451	0.130136	0.682456	0.001285	2.89324	0.003813	0/+
C16orf46	THAP9-AS1	0.304313	2.55e-10	0.790698	5.58e-05	2.89314	0.003814	#ERROR!
DGAT2	THAP9-AS1	0.26825	2.96e-08	0.775439	9.6e-05	2.89248	0.003822	#ERROR!
KRT81	THAP9-AS1	0.002906	0.952996	0.642043	0.003039	2.89204	0.003827	0/+
SLITRK1	THAP9-AS1	0.05343	0.278087	0.67076	0.00167	2.89169	0.003832	0/+
POM121L9P	THAP9-AS1	-0.10113	0.039717	0.576451	0.009781	2.89154	0.003834	-/+
CNBD2	THAP9-AS1	0.208765	1.85e-05	0.74882	0.000225	2.8907	0.003844	#ERROR!
NEURL1B	THAP9-AS1	0.089206	0.069801	-0.58421	0.008625	-2.89029	0.003849	0/-
ABHD17C	THAP9-AS1	0.256698	1.18e-07	0.770175	0.000115	2.88996	0.003853	#ERROR!
FOXQ1	THAP9-AS1	0.361978	2.91e-14	0.813515	2.27e-05	2.8899	0.003854	#ERROR!
DNLZ	THAP9-AS1	0.210817	1.52e-05	0.74957	0.00022	2.88903	0.003864	#ERROR!
FAM83F	THAP9-AS1	0.252924	1.83e-07	0.768421	0.000121	2.88896	0.003865	#ERROR!
PITPNB	THAP9-AS1	0.242612	5.84e-07	-0.47018	0.042213	-2.88864	0.003869	#ERROR!
HLA-J	THAP9-AS1	0.079842	0.104756	0.684511	0.001225	2.88749	0.003883	0/+
KLRK1-AS1	THAP9-AS1	0.195086	6.45e-05	0.742105	0.000275	2.88745	0.003884	#ERROR!
ANTXR2	THAP9-AS1	0.013469	0.784673	-0.63158	0.003726	-2.88736	0.003885	0/-
ANGPTL6	THAP9-AS1	0.133246	0.006626	0.71209	0.000626	2.88683	0.003891	#ERROR!
RBPMS	THAP9-AS1	0.168262	0.000586	-0.52807	0.020124	-2.88673	0.003893	#ERROR!
HEPACAM2	THAP9-AS1	0.256788	1.17e-07	0.769852	0.000116	2.88656	0.003895	#ERROR!
MBNL1-AS1	THAP9-AS1	0.030486	0.536204	-0.62105	0.004541	-2.88623	0.003899	0/-
RPS24P10	THAP9-AS1	0.335921	2.23e-12	0.802855	3.51e-05	2.88583	0.003904	#ERROR!
KATNAL1	THAP9-AS1	-0.04759	0.334044	-0.66667	0.001825	-2.88577	0.003905	0/-
PARP14	THAP9-AS1	0.199327	4.42e-05	0.74386	0.000261	2.88556	0.003907	#ERROR!
RAB15	THAP9-AS1	0.31603	4.7e-11	0.794737	4.8e-05	2.88516	0.003912	#ERROR!
MIR3936HG	THAP9-AS1	0.444245	0	0.84386	5.61e-06	2.88513	0.003912	#ERROR!
ARHGEF35	THAP9-AS1	0.179628	0.000239	0.734533	0.000342	2.88505	0.003913	#ERROR!
NCF4	THAP9-AS1	-0.04699	0.340241	0.610526	0.005497	2.8846	0.003919	0/+
ALDH1B1	THAP9-AS1	-0.02319	0.637964	-0.65263	0.002454	-2.88417	0.003924	0/-
IL2	THAP9-AS1	0.031277	0.52567	0.657248	0.00223	2.88415	0.003925	0/+
ATP2B2	THAP9-AS1	0.086813	0.077669	-0.58466	0.00856	-2.88372	0.00393	0/-
FSHR	THAP9-AS1	-0.03005	0.542088	-0.65641	0.00227	-2.88322	0.003936	0/-
CAPN15	THAP9-AS1	0.378535	1.33e-15	0.819298	1.78e-05	2.88287	0.003941	#ERROR!
ARSH	THAP9-AS1	0.301398	3.85e-10	0.788339	6.09e-05	2.88151	0.003958	#ERROR!
CD1E	THAP9-AS1	0.02102	0.669776	0.650877	0.002544	2.88083	0.003966	0/+
BTBD16	THAP9-AS1	0.148271	0.002491	0.718736	0.000526	2.8803	0.003973	#ERROR!
HSPA5P1	THAP9-AS1	0.218015	7.59e-06	0.751765	0.000206	2.87945	0.003984	#ERROR!
LINC02182	THAP9-AS1	-0.14713	0.002692	0.542144	0.016488	2.87929	0.003986	-/+
CCDC194	THAP9-AS1	0.1334	0.006563	0.711189	0.00064	2.87927	0.003986	#ERROR!
CEMIP	THAP9-AS1	-0.05378	0.274916	0.605263	0.006034	2.87874	0.003993	0/+
RNF212	THAP9-AS1	-0.05057	0.304655	0.607284	0.005823	2.87864	0.003994	0/+
C4orf19	THAP9-AS1	0.309061	1.3e-10	0.791228	5.47e-05	2.87857	0.003995	#ERROR!
LONRF2	THAP9-AS1	0.168156	0.000591	-0.52632	0.020619	-2.87705	0.004014	#ERROR!
EFHD2	THAP9-AS1	0.301118	4e-10	0.787719	6.23e-05	2.87645	0.004022	#ERROR!
PTK6	THAP9-AS1	0.270979	2.12e-08	0.774901	9.77e-05	2.87613	0.004026	#ERROR!
PHGR1	THAP9-AS1	0.205443	2.53e-05	0.745596	0.000248	2.87611	0.004026	#ERROR!
HLA-DPB1	THAP9-AS1	-0.15822	0.001238	0.533333	0.018697	2.87535	0.004036	-/+
LILRB1	THAP9-AS1	-0.16525	0.000737	0.52807	0.020124	2.87491	0.004041	-/+
CPT1B	THAP9-AS1	0.441619	0	0.842105	6.13e-06	2.87448	0.004047	#ERROR!
GPR153	THAP9-AS1	0.025744	0.601454	0.652632	0.002454	2.87445	0.004047	0/+
GPX1	THAP9-AS1	0.025796	0.60071	0.652632	0.002454	2.87425	0.00405	0/+
RHBDF2	THAP9-AS1	0.140412	0.004203	0.714035	0.000595	2.87408	0.004052	#ERROR!
LINC00937	THAP9-AS1	0.226372	3.28e-06	0.754953	0.000187	2.87404	0.004053	#ERROR!
KRT8	THAP9-AS1	0.198585	4.72e-05	0.742105	0.000275	2.87357	0.004059	#ERROR!
ACAP1	THAP9-AS1	0.008061	0.870112	0.642105	0.003035	2.8728	0.004069	0/+
FAM87A	THAP9-AS1	0.10241	0.03726	0.694321	0.000973	2.87201	0.004079	#ERROR!
CLASRP	THAP9-AS1	0.517698	0	0.868421	1.43e-06	2.87182	0.004081	#ERROR!
PIP5K1C	THAP9-AS1	0.301162	3.97e-10	-0.41579	0.076641	-2.87166	0.004083	#ERROR!
MAP3K20-AS1	THAP9-AS1	-0.07772	0.11434	-0.68106	0.001326	-2.87101	0.004092	0/-
HSPB6	THAP9-AS1	-0.16257	0.0009	-0.72456	0.00045	-2.87077	0.004095	-/-
CCDC136	THAP9-AS1	0.098055	0.046163	-0.57481	0.01004	-2.87038	0.0041	#ERROR!
C6orf118	THAP9-AS1	0.206713	2.24e-05	0.745515	0.000249	2.87036	0.0041	#ERROR!
NAP1L4	THAP9-AS1	0.34557	4.69e-13	0.805263	3.19e-05	2.87019	0.004102	#ERROR!
COBLL1	THAP9-AS1	0.311149	9.6e-11	0.791228	5.47e-05	2.86976	0.004108	#ERROR!
GVINP1	THAP9-AS1	-0.01465	0.766376	0.62807	0.003983	2.86968	0.004109	0/+
ACHE	THAP9-AS1	0.033681	0.49433	0.656428	0.002269	2.86948	0.004111	0/+
KIAA2012-AS1	THAP9-AS1	0.041677	0.39766	-0.61137	0.005415	-2.86943	0.004112	0/-
RNF141	THAP9-AS1	0.273986	1.46e-08	0.775439	9.6e-05	2.86888	0.004119	#ERROR!
CBFB	THAP9-AS1	0.3547	1.02e-13	0.808772	2.77e-05	2.86888	0.004119	#ERROR!
MIR34AHG	THAP9-AS1	0.335632	2.33e-12	0.801086	3.76e-05	2.86818	0.004128	#ERROR!
KRT18	THAP9-AS1	0.141966	0.003797	0.714035	0.000595	2.86803	0.00413	#ERROR!
APOL1	THAP9-AS1	0.163403	0.000846	0.724561	0.00045	2.86751	0.004137	#ERROR!
PIGL	THAP9-AS1	0.523781	0	0.870175	1.28e-06	2.86738	0.004139	#ERROR!
ARAP1-AS2	THAP9-AS1	0.359489	4.49e-14	0.810452	2.58e-05	2.86654	0.00415	#ERROR!
SHH	THAP9-AS1	0.175237	0.00034	0.730145	0.000386	2.86627	0.004153	#ERROR!
NOC2LP1	THAP9-AS1	0.071366	0.147186	-0.59175	0.00761	-2.86575	0.00416	0/-
LINC01814	THAP9-AS1	0.257931	1.02e-07	0.768088	0.000123	2.86544	0.004164	#ERROR!
PRG4	THAP9-AS1	0.145556	0.002993	-0.54059	0.016862	-2.86478	0.004173	#ERROR!
ABCC11	THAP9-AS1	0.335555	2.36e-12	0.800703	3.82e-05	2.86443	0.004178	#ERROR!
COL4A1	THAP9-AS1	-0.04379	0.374127	-0.6614	0.002043	-2.8644	0.004178	0/-
PPP2R2A	THAP9-AS1	0.287433	2.57e-09	0.780702	8e-05	2.86408	0.004182	#ERROR!
POLR3D	THAP9-AS1	0.105559	0.031768	0.694737	0.000963	2.86294	0.004197	#ERROR!
IFIT1B	THAP9-AS1	0.009337	0.849775	0.641236	0.003088	2.8623	0.004206	0/+
DMD	THAP9-AS1	-0.06335	0.198282	-0.67193	0.001627	-2.86185	0.004212	0/-
KLRC2	THAP9-AS1	-0.00561	0.909474	0.632243	0.003679	2.8616	0.004215	0/+
FAM83A-AS1	THAP9-AS1	0.070881	0.149962	0.675972	0.001488	2.86126	0.00422	0/+
LRRC63	THAP9-AS1	0.161733	0.000958	0.722955	0.00047	2.86119	0.004221	#ERROR!
MIGA2	THAP9-AS1	0.499163	0	0.861404	2.17e-06	2.86091	0.004224	#ERROR!
ATP2B4	THAP9-AS1	0.086803	0.077703	-0.5807	0.009133	-2.86081	0.004226	0/-
PYGB	THAP9-AS1	0.048926	0.32067	-0.60526	0.006034	-2.86018	0.004234	0/-
FAAH	THAP9-AS1	0.430222	0	0.836842	7.95e-06	2.86017	0.004234	#ERROR!
SLC22A13	THAP9-AS1	0.274364	1.39e-08	0.774674	9.85e-05	2.86002	0.004236	#ERROR!
SFXN5	THAP9-AS1	0.276933	1e-08	0.775779	9.49e-05	2.85998	0.004237	#ERROR!
NOP10	THAP9-AS1	0.158431	0.001219	0.721053	0.000495	2.85896	0.00425	#ERROR!
MIR6804	THAP9-AS1	0.187201	0.000127	0.734971	0.000337	2.85881	0.004252	#ERROR!
MIR708	THAP9-AS1	0.124111	0.01149	0.703789	0.000772	2.8588	0.004252	#ERROR!
CLEC7A	THAP9-AS1	-0.06038	0.220208	0.597631	0.006887	2.85839	0.004258	0/+
SEMA5A-AS1	THAP9-AS1	0.297635	6.48e-10	0.78441	7.01e-05	2.85801	0.004263	#ERROR!
ASPHD1	THAP9-AS1	-0.01679	0.733427	0.624836	0.004233	2.85756	0.004269	0/+
F11R	THAP9-AS1	0.375391	2.66e-15	0.815789	2.07e-05	2.85651	0.004283	#ERROR!
EEF2K	THAP9-AS1	0.309009	1.31e-10	-0.40526	0.08519	-2.85638	0.004285	#ERROR!
MORN5	THAP9-AS1	0.015452	0.753918	-0.62538	0.00419	-2.8559	0.004292	0/-
HS6ST1	THAP9-AS1	0.293539	1.13e-09	0.782456	7.52e-05	2.85584	0.004292	#ERROR!
SETD7	THAP9-AS1	0.172091	0.000436	-0.5193	0.022694	-2.85569	0.004294	#ERROR!
EFNA5	THAP9-AS1	0.218204	7.45e-06	0.749123	0.000223	2.85563	0.004295	#ERROR!
KLHL5	THAP9-AS1	-0.01292	0.793179	-0.64211	0.003035	-2.85426	0.004314	0/-
SERTM1	THAP9-AS1	0.031643	0.520835	-0.61512	0.005062	-2.85403	0.004317	0/-
OVCH2	THAP9-AS1	0.348444	2.91e-13	0.804916	3.23e-05	2.85398	0.004318	#ERROR!
ANKRD40	THAP9-AS1	0.327091	8.87e-12	-0.38772	0.100965	-2.85371	0.004321	#ERROR!
CARD14	THAP9-AS1	0.248446	3.05e-07	0.762615	0.000147	2.85371	0.004321	#ERROR!
IKZF2	THAP9-AS1	0.380538	8.88e-16	0.817544	1.92e-05	2.8537	0.004321	#ERROR!
GATAD2A	THAP9-AS1	0.340889	1.01e-12	0.801754	3.66e-05	2.85267	0.004335	#ERROR!
DISP2	THAP9-AS1	0.028526	0.562743	0.650877	0.002544	2.85221	0.004342	0/+
MFSD6L	THAP9-AS1	0.238183	9.47e-07	0.757804	0.000171	2.85184	0.004347	#ERROR!
KRT14	THAP9-AS1	-0.12028	0.014329	0.55614	0.013411	2.85149	0.004351	-/+
PEX16	THAP9-AS1	0.226953	3.09e-06	0.752632	0.000201	2.85121	0.004355	#ERROR!
PTPN11	THAP9-AS1	0.220304	6.05e-06	-0.4807	0.037218	-2.85064	0.004363	#ERROR!
SALL1	THAP9-AS1	0.087938	0.073884	0.683657	0.00125	2.85029	0.004368	0/+
LINC02611	THAP9-AS1	-0.0684	0.164816	0.591031	0.007702	2.85017	0.00437	0/+
FNDC1	THAP9-AS1	-0.22853	2.62e-06	0.473684	0.040494	2.84902	0.004385	-/+
SHROOM3	THAP9-AS1	0.20229	3.38e-05	-0.49474	0.031283	-2.84896	0.004386	#ERROR!
NOP14	THAP9-AS1	0.350608	2.03e-13	0.805263	3.19e-05	2.84834	0.004395	#ERROR!
CDK16	THAP9-AS1	0.266942	3.48e-08	0.770175	0.000115	2.84803	0.004399	#ERROR!
EXOC1L	THAP9-AS1	0.141537	0.003906	0.711229	0.00064	2.84797	0.0044	#ERROR!
C2CD2	THAP9-AS1	0.299681	4.88e-10	0.784211	7.06e-05	2.84748	0.004407	#ERROR!
MIR4326	THAP9-AS1	0.302438	3.32e-10	0.78536	6.78e-05	2.84733	0.004409	#ERROR!
CTTNBP2	THAP9-AS1	0.179094	0.00025	-0.51228	0.024931	-2.84679	0.004416	#ERROR!
LOC101928517	THAP9-AS1	-0.07177	0.144924	0.588218	0.008072	2.84665	0.004418	0/+
C5orf63	THAP9-AS1	0.448504	0	0.842475	6.01e-06	2.8466	0.004419	#ERROR!
HOXA1	THAP9-AS1	0.196816	5.53e-05	0.738043	0.000309	2.84635	0.004422	#ERROR!
MIR181A2HG	THAP9-AS1	0.225332	3.65e-06	0.751333	0.000209	2.84633	0.004423	#ERROR!
PLPPR5	THAP9-AS1	0.00648	0.895423	0.637023	0.003354	2.84604	0.004427	0/+
FAM160A2	THAP9-AS1	0.395929	0	0.822807	1.52e-05	2.84592	0.004428	#ERROR!
SLAIN2	THAP9-AS1	0.343382	6.71e-13	-0.37018	0.118752	-2.84558	0.004433	#ERROR!
SERP1	THAP9-AS1	0.342532	7.7e-13	0.801754	3.66e-05	2.84558	0.004433	#ERROR!
ARG2	THAP9-AS1	0.23611	1.18e-06	0.75614	0.00018	2.84537	0.004436	#ERROR!
NCS1	THAP9-AS1	0.042119	0.392673	-0.60702	0.00585	-2.84475	0.004445	0/-
FZD5	THAP9-AS1	0.267745	3.15e-08	0.770175	0.000115	2.84474	0.004445	#ERROR!
MRI1	THAP9-AS1	0.447935	0	0.842105	6.13e-06	2.84446	0.004449	#ERROR!
DUSP26	THAP9-AS1	-0.11337	0.02104	0.559649	0.012717	2.8442	0.004452	-/+
GLI1	THAP9-AS1	-0.13572	0.005676	0.54386	0.016083	2.84419	0.004452	-/+
LINC02273	THAP9-AS1	-0.06861	0.163463	0.589792	0.007863	2.84376	0.004458	0/+
HOXB3	THAP9-AS1	0.378307	1.55e-15	0.815789	2.07e-05	2.84356	0.004461	#ERROR!
FAM221A	THAP9-AS1	0.497517	0	0.859649	2.4e-06	2.84349	0.004462	#ERROR!
RPL10AP6	THAP9-AS1	0.260496	7.56e-08	0.766667	0.000129	2.84178	0.004486	#ERROR!
ARFGAP1	THAP9-AS1	0.280603	6.27e-09	0.775439	9.6e-05	2.84155	0.004489	#ERROR!
LINCR-0001	THAP9-AS1	0.175639	0.00033	0.727287	0.000418	2.84145	0.004491	#ERROR!
CD8B	THAP9-AS1	-0.02872	0.560105	0.614845	0.005087	2.84121	0.004494	0/+
HTR1B	THAP9-AS1	-0.03192	0.517176	-0.65116	0.002529	-2.84114	0.004495	0/-
PYGM	THAP9-AS1	-0.00159	0.974245	-0.63333	0.003603	-2.8411	0.004496	0/-
IRAK2	THAP9-AS1	0.226571	3.21e-06	0.751207	0.00021	2.84025	0.004508	#ERROR!
LOC100422497	THAP9-AS1	0.150633	0.002118	0.714704	0.000585	2.83948	0.004519	#ERROR!
AGXT	THAP9-AS1	0.045687	0.353791	0.658734	0.002162	2.83914	0.004524	0/+
PLAAT2	THAP9-AS1	-0.03785	0.442382	0.608696	0.005679	2.83862	0.004531	0/+
RGL2	THAP9-AS1	0.468741	0	0.849123	4.27e-06	2.83795	0.00454	#ERROR!
CLIC1	THAP9-AS1	0.118836	0.015554	0.698246	0.000885	2.83766	0.004545	#ERROR!
SEL1L3	THAP9-AS1	0.241968	6.27e-07	0.757895	0.00017	2.83735	0.004549	#ERROR!
MIR200C	THAP9-AS1	0.236398	1.15e-06	0.755345	0.000185	2.83713	0.004552	#ERROR!
LYPD6B	THAP9-AS1	0.268553	2.86e-08	0.769636	0.000117	2.83637	0.004563	#ERROR!
GAK	THAP9-AS1	0.488972	0	0.85614	2.92e-06	2.83587	0.00457	#ERROR!
PPP1R13B	THAP9-AS1	0.402822	0	0.824561	1.41e-05	2.83546	0.004576	#ERROR!
HNF4G	THAP9-AS1	0.202178	3.41e-05	0.739245	0.000299	2.83515	0.00458	#ERROR!
LOC102724934	THAP9-AS1	-0.07057	0.151739	-0.67194	0.001627	-2.83428	0.004593	0/-
KRT74	THAP9-AS1	0.096891	0.048825	0.686207	0.001178	2.83418	0.004594	#ERROR!
CORO7	THAP9-AS1	0.139139	0.004564	0.708205	0.000691	2.83407	0.004596	#ERROR!
KCNMA1-AS1	THAP9-AS1	0.046126	0.349179	-0.60257	0.006324	-2.83334	0.004606	0/-
CCDC177	THAP9-AS1	0.111732	0.022987	0.693832	0.000984	2.83248	0.004619	#ERROR!
KRT36	THAP9-AS1	0.044305	0.368554	0.656956	0.002244	2.83247	0.004619	0/+
SEC23A	THAP9-AS1	0.047063	0.339468	-0.60175	0.006415	-2.83203	0.004625	0/-
GPSM3	THAP9-AS1	-0.02462	0.617398	0.615789	0.005001	2.83138	0.004635	0/+
CEPT1	THAP9-AS1	0.473587	0	0.850373	4e-06	2.83135	0.004635	#ERROR!
RPS6	THAP9-AS1	0.333397	3.32e-12	0.796491	4.49e-05	2.82938	0.004664	#ERROR!
MRAP2	THAP9-AS1	0.246871	3.64e-07	0.759105	0.000164	2.82833	0.004679	#ERROR!
CLCA4	THAP9-AS1	0.188672	0.000112	0.7319	0.000368	2.82767	0.004689	#ERROR!
PPP1R12B	THAP9-AS1	0.093773	0.056593	-0.57018	0.010805	-2.82761	0.00469	0/-
SLC8B1	THAP9-AS1	0.236754	1.1e-06	0.754386	0.00019	2.8272	0.004696	#ERROR!
EGOT	THAP9-AS1	0.019807	0.687799	0.64193	0.003046	2.82688	0.0047	0/+
PRCD	THAP9-AS1	0.088607	0.071708	0.680702	0.001337	2.82665	0.004704	0/+
RN7SL265P	THAP9-AS1	0.127576	0.009361	0.701294	0.000821	2.8266	0.004705	#ERROR!
GPRIN2	THAP9-AS1	0.171567	0.000454	0.723442	0.000464	2.82653	0.004706	#ERROR!
RAB41	THAP9-AS1	0.332239	3.99e-12	-0.37665	0.11195	-2.8263	0.004709	#ERROR!
MIR219A1	THAP9-AS1	0.268766	2.78e-08	0.768584	0.000121	2.82568	0.004718	#ERROR!
DUSP11	THAP9-AS1	0.347137	3.62e-13	0.801754	3.66e-05	2.82566	0.004718	#ERROR!
CTSB	THAP9-AS1	-0.16677	0.000657	0.517544	0.023238	2.82565	0.004718	-/+
GRHL3	THAP9-AS1	0.317388	3.84e-11	0.789474	5.84e-05	2.82556	0.00472	#ERROR!
CPNE6	THAP9-AS1	0.078376	0.111309	-0.58008	0.009226	-2.82489	0.00473	0/-
AMY2B	THAP9-AS1	0.343036	7.1e-13	0.8	3.92e-05	2.82475	0.004732	#ERROR!
CD40	THAP9-AS1	0.060464	0.219571	0.664912	0.001896	2.82455	0.004735	0/+
MYCNUT	THAP9-AS1	0.088793	0.071112	0.680421	0.001346	2.82395	0.004744	0/+
NAPRT	THAP9-AS1	0.160352	0.00106	0.717544	0.000543	2.82374	0.004747	#ERROR!
BAK1	THAP9-AS1	0.129351	0.008413	0.701754	0.000812	2.82318	0.004755	#ERROR!
GATA2	THAP9-AS1	0.230131	2.22e-06	0.750877	0.000212	2.82305	0.004757	#ERROR!
RAB17	THAP9-AS1	0.27707	9.86e-09	0.77193	0.000108	2.82284	0.00476	#ERROR!
RABGAP1	THAP9-AS1	0.39483	0	-0.31228	0.193042	-2.82284	0.00476	#ERROR!
CD300LB	THAP9-AS1	-0.20924	1.77e-05	0.483758	0.035857	2.82162	0.004778	-/+
QARS1	THAP9-AS1	0.348111	3.08e-13	0.801754	3.66e-05	2.82144	0.004781	#ERROR!
GRID2IP	THAP9-AS1	0.346866	3.78e-13	0.801229	3.74e-05	2.82123	0.004784	#ERROR!
RILP	THAP9-AS1	0.223745	4.28e-06	0.747696	0.000233	2.82107	0.004786	#ERROR!
OLFM4	THAP9-AS1	-0.06849	0.164225	0.585965	0.008379	2.821	0.004787	0/+
SERPINB3	THAP9-AS1	-0.00868	0.860215	0.623795	0.004316	2.82015	0.0048	0/+
FER	THAP9-AS1	0.250513	2.41e-07	-0.44912	0.053732	-2.81896	0.004818	#ERROR!
CCDC73	THAP9-AS1	0.365338	1.6e-14	0.808461	2.8e-05	2.81886	0.004819	#ERROR!
HID1	THAP9-AS1	0.298366	5.86e-10	0.780702	8e-05	2.8185	0.004825	#ERROR!
LOC91370	THAP9-AS1	0.12113	0.013653	0.696615	0.00092	2.81669	0.004852	#ERROR!
KCNK5	THAP9-AS1	0.217132	8.28e-06	0.74386	0.000261	2.81461	0.004884	#ERROR!
CKMT2	THAP9-AS1	0.137803	0.004973	-0.53684	0.01779	-2.8145	0.004885	#ERROR!
ARHGAP18	THAP9-AS1	0.124865	0.010993	0.698246	0.000885	2.81433	0.004888	#ERROR!
CDH8	THAP9-AS1	0.164134	0.000801	0.718174	0.000534	2.81389	0.004895	#ERROR!
LINC01068	THAP9-AS1	0.314079	6.26e-11	0.78692	6.41e-05	2.81387	0.004895	#ERROR!
PNMA1	THAP9-AS1	0.019912	0.686232	-0.61579	0.005001	-2.81342	0.004902	0/-
DHRS7B	THAP9-AS1	0.275426	1.21e-08	0.770175	0.000115	2.81313	0.004906	#ERROR!
ABCA3	THAP9-AS1	0.140706	0.004123	-0.53444	0.018406	-2.81298	0.004909	#ERROR!
PPARG	THAP9-AS1	0.333022	3.53e-12	0.794737	4.8e-05	2.81277	0.004912	#ERROR!
ASPHD2	THAP9-AS1	0.085765	0.081334	0.677193	0.001448	2.81276	0.004912	0/+
CMTM8	THAP9-AS1	0.170411	0.000497	0.721053	0.000495	2.81203	0.004923	#ERROR!
ABI3	THAP9-AS1	-0.14909	0.002354	0.52807	0.020124	2.81178	0.004927	-/+
DNAH2	THAP9-AS1	0.207458	2.09e-05	0.738921	0.000301	2.81142	0.004932	#ERROR!
EML3	THAP9-AS1	0.225657	3.53e-06	0.747368	0.000235	2.81056	0.004946	#ERROR!
DNAJB12	THAP9-AS1	0.23328	1.6e-06	0.750877	0.000212	2.81036	0.004949	#ERROR!
PTPN21	THAP9-AS1	0.225318	3.65e-06	-0.46842	0.043093	-2.81032	0.004949	#ERROR!
KYAT1	THAP9-AS1	0.337929	1.62e-12	0.796491	4.49e-05	2.80991	0.004956	#ERROR!
LOC105370854	THAP9-AS1	0.020005	0.684854	-0.61512	0.005062	-2.80964	0.00496	0/-
LINC02461	THAP9-AS1	-0.11568	0.018541	0.551666	0.01434	2.80911	0.004968	-/+
RBM38-AS1	THAP9-AS1	0.172905	0.000409	-0.50967	0.025807	-2.80896	0.00497	#ERROR!
CTR9	THAP9-AS1	0.333922	3.06e-12	0.794737	4.8e-05	2.8089	0.004971	#ERROR!
LACTB	THAP9-AS1	0.241373	6.69e-07	0.754386	0.00019	2.80852	0.004977	#ERROR!
PDE8B	THAP9-AS1	0.332931	3.58e-12	-0.37193	0.116879	-2.80836	0.004979	#ERROR!
HNRNPH1	THAP9-AS1	0.545311	0	0.873684	1.03e-06	2.80826	0.004981	#ERROR!
CCL3L1	THAP9-AS1	-0.03478	0.480349	0.605529	0.006006	2.80776	0.004989	0/+
ASXL3	THAP9-AS1	0.032369	0.511315	-0.60702	0.00585	-2.80754	0.004992	0/-
CTTN	THAP9-AS1	0.325846	1.07e-11	0.791228	5.47e-05	2.80741	0.004994	#ERROR!
GAS2L2	THAP9-AS1	0.208563	1.89e-05	0.738954	0.000301	2.8073	0.004996	#ERROR!
DDX55	THAP9-AS1	0.540333	0	0.87193	1.15e-06	2.80708	0.004999	#ERROR!
A4GALT	THAP9-AS1	-0.04046	0.411547	0.601754	0.006415	2.80683	0.005003	0/+
FYB1	THAP9-AS1	-0.13823	0.004838	0.535088	0.018239	2.80678	0.005004	-/+
SLC22A18	THAP9-AS1	0.253378	1.74e-07	0.759649	0.000161	2.80678	0.005004	#ERROR!
ENAH	THAP9-AS1	0.147437	0.002636	-0.52807	0.020124	-2.80532	0.005027	#ERROR!
LINC00114	THAP9-AS1	0.156918	0.00136	0.713414	0.000605	2.80491	0.005033	#ERROR!
FBF1	THAP9-AS1	0.270249	2.32e-08	0.767003	0.000127	2.80491	0.005033	#ERROR!
MYLPF	THAP9-AS1	0.223798	4.26e-06	0.745825	0.000246	2.80473	0.005036	#ERROR!
SEC14L4	THAP9-AS1	0.087411	0.075638	0.676941	0.001456	2.80466	0.005037	0/+
SLC2A13	THAP9-AS1	0.115636	0.018591	-0.55088	0.014508	-2.8046	0.005038	#ERROR!
DLX3	THAP9-AS1	0.117981	0.016319	0.693287	0.000997	2.80433	0.005042	#ERROR!
LYPLAL1-DT	THAP9-AS1	0.094671	0.054259	-0.56541	0.01164	-2.80425	0.005043	0/-
GPT	THAP9-AS1	0.340957	9.94e-13	0.797191	4.37e-05	2.80417	0.005045	#ERROR!
DEPTOR	THAP9-AS1	0.175999	0.00032	0.722807	0.000472	2.80404	0.005047	#ERROR!
RASL10B	THAP9-AS1	-0.02259	0.646748	-0.64	0.003164	-2.80379	0.005051	0/-
KANK2	THAP9-AS1	0.014557	0.767751	-0.61754	0.004843	-2.80379	0.005051	0/-
HOMER2	THAP9-AS1	0.05865	0.233747	0.660816	0.002069	2.80364	0.005053	0/+
MARVELD2	THAP9-AS1	0.431547	0	0.832821	9.63e-06	2.8034	0.005057	#ERROR!
SGCB	THAP9-AS1	0.017232	0.726649	-0.61579	0.005001	-2.8032	0.00506	0/-
PFKL	THAP9-AS1	0.41004	0	0.824561	1.41e-05	2.8025	0.005071	#ERROR!
RAB30	THAP9-AS1	0.060879	0.21642	-0.58772	0.008139	-2.80206	0.005078	0/-
DYNC1LI2	THAP9-AS1	0.356276	7.77e-14	-0.34737	0.145066	-2.8018	0.005082	#ERROR!
CSTA	THAP9-AS1	0.053982	0.273142	0.657895	0.0022	2.80179	0.005082	0/+
POPDC2	THAP9-AS1	-0.00101	0.983707	-0.62659	0.004096	-2.80072	0.005099	0/-
FGF6	THAP9-AS1	-0.0108	0.826551	-0.63246	0.003664	-2.80041	0.005104	0/-
IL21-AS1	THAP9-AS1	0.172781	0.000413	0.720712	0.000499	2.80002	0.00511	#ERROR!
PLEKHH3	THAP9-AS1	0.38365	4.44e-16	0.814035	2.23e-05	2.79982	0.005113	#ERROR!
LINC00996	THAP9-AS1	-0.07889	0.108973	0.575336	0.009957	2.79973	0.005115	0/+
CLCF1	THAP9-AS1	-0.06006	0.222694	0.587719	0.008139	2.79892	0.005127	0/+
BNIPL	THAP9-AS1	0.26722	3.36e-08	0.764912	0.000136	2.79807	0.005141	#ERROR!
RORB	THAP9-AS1	-0.00683	0.889758	0.621325	0.004518	2.79773	0.005146	0/+
METTL7A	THAP9-AS1	0.191981	8.46e-05	0.729825	0.00039	2.7976	0.005148	#ERROR!
COL4A2	THAP9-AS1	-0.10929	0.026172	-0.68772	0.001137	-2.79733	0.005153	-/-
EPS8L1	THAP9-AS1	0.22523	3.68e-06	0.745614	0.000248	2.79717	0.005155	#ERROR!
ANKK1	THAP9-AS1	0.168518	0.000575	0.718174	0.000534	2.7967	0.005163	#ERROR!
SGSM3	THAP9-AS1	0.406814	0	0.822807	1.52e-05	2.79646	0.005167	#ERROR!
NRG4	THAP9-AS1	0.24343	5.34e-07	0.753955	0.000193	2.79639	0.005168	#ERROR!
CD40LG	THAP9-AS1	-0.06389	0.194523	0.584724	0.008552	2.79618	0.005171	0/+
C19orf33	THAP9-AS1	0.092241	0.060772	0.678368	0.00141	2.79616	0.005171	0/+
RRP7A	THAP9-AS1	0.18515	0.000151	0.726316	0.000429	2.79614	0.005172	#ERROR!
EHF	THAP9-AS1	0.344118	5.95e-13	0.797718	4.29e-05	2.79604	0.005173	#ERROR!
RPL15P3	THAP9-AS1	0.332798	3.65e-12	0.792982	5.13e-05	2.79564	0.00518	#ERROR!
CFH	THAP9-AS1	-0.0067	0.891932	0.621053	0.004541	2.79553	0.005182	0/+
NEU1	THAP9-AS1	0.225666	3.52e-06	0.745614	0.000248	2.79542	0.005183	#ERROR!
IGSF8	THAP9-AS1	0.3371	1.85e-12	0.794737	4.8e-05	2.79525	0.005186	#ERROR!
KPNA3	THAP9-AS1	0.186486	0.000135	-0.49649	0.030596	-2.79522	0.005187	#ERROR!
ACOXL	THAP9-AS1	0.263931	5.01e-08	0.763079	0.000145	2.79477	0.005194	#ERROR!
LENG8	THAP9-AS1	0.568751	0	0.880702	6.49e-07	2.79476	0.005194	#ERROR!
B3GNT7	THAP9-AS1	-0.01218	0.804837	0.617544	0.004843	2.79473	0.005194	0/+
CTLA4	THAP9-AS1	-0.09508	0.053223	0.563405	0.012006	2.79461	0.005196	0/+
PDCD11	THAP9-AS1	0.284031	4.02e-09	0.77193	0.000108	2.79404	0.005205	#ERROR!
BNIP1	THAP9-AS1	0.280062	6.73e-09	0.770175	0.000115	2.79398	0.005206	#ERROR!
BNIP3P40	THAP9-AS1	0.331094	4.77e-12	0.792099	5.3e-05	2.79388	0.005208	#ERROR!
AKR1C7P	THAP9-AS1	-0.04537	0.357122	0.596412	0.007032	2.7938	0.005209	0/+
HPS6	THAP9-AS1	0.203871	2.92e-05	0.735088	0.000336	2.79372	0.005211	#ERROR!
PIR	THAP9-AS1	0.226215	3.33e-06	0.745614	0.000248	2.79322	0.005219	#ERROR!
GNGT2	THAP9-AS1	-0.15075	0.0021	0.523266	0.021501	2.79294	0.005223	-/+
BCL10	THAP9-AS1	0.333477	3.28e-12	0.792982	5.13e-05	2.79273	0.005227	#ERROR!
RNU4-9P	THAP9-AS1	-0.01284	0.794499	-0.63246	0.003664	-2.79264	0.005228	0/-
GPATCH2L	THAP9-AS1	0.384781	4.44e-16	-0.31579	0.187821	-2.79251	0.00523	#ERROR!
HLA-V	THAP9-AS1	0.107335	0.028988	0.685991	0.001184	2.7924	0.005232	#ERROR!
RAD17P1	THAP9-AS1	0.080343	0.102588	0.671291	0.00165	2.79231	0.005233	0/+
GPC4	THAP9-AS1	0.047554	0.334447	-0.59474	0.007235	-2.79224	0.005234	0/-
EPS8L2	THAP9-AS1	0.333669	3.18e-12	0.792982	5.13e-05	2.79191	0.00524	#ERROR!
[truncated: 21,922 more rows]

## Sheet: BRCA
Gene1	Gene2	TCGA_BRCA.PrimarySolidTumor_cor	TCGA_BRCA.PrimarySolidTumor_pVal	TCGA_BRCA.SolidTissueNormal_cor	TCGA_BRCA.SolidTissueNormal_pVal	zScoreDiff	pValDiff	Classes
MSANTD2	THAP9-AS1	0.436158	0	0.896517	0	9.58335	9.39e-22	#ERROR!
SSBP2	THAP9-AS1	0.189548	2.26e-10	0.814934	0	9.22371	2.87e-20	#ERROR!
PARP8	THAP9-AS1	0.170024	1.35e-08	0.805683	0	9.15798	5.29e-20	#ERROR!
MAP4K5	THAP9-AS1	0.405877	0	0.877178	0	9.05909	1.32e-19	#ERROR!
SLC33A1	THAP9-AS1	0.322502	0	0.852253	0	9.03154	1.69e-19	#ERROR!
PPP3CB-AS1	THAP9-AS1	0.37544	0	0.8657	0	8.94436	3.74e-19	#ERROR!
GOLPH3L	THAP9-AS1	0.275842	0	0.834712	0	8.93839	3.95e-19	#ERROR!
SPATA6	THAP9-AS1	0.270575	0	0.831217	0	8.8828	6.52e-19	#ERROR!
FAM111A	THAP9-AS1	0.388943	0	0.86629	0	8.8137	1.21e-18	#ERROR!
ALKBH8	THAP9-AS1	0.352749	0	0.854955	0	8.79662	1.41e-18	#ERROR!
POT1	THAP9-AS1	0.437004	0	0.879514	0	8.79072	1.49e-18	#ERROR!
GSPT2	THAP9-AS1	0.137871	4.36e-06	0.778576	0	8.77025	1.78e-18	#ERROR!
REPS2	THAP9-AS1	0.133791	8.34e-06	0.776326	0	8.75538	2.03e-18	#ERROR!
IL1RAP	THAP9-AS1	0.182879	9.61e-10	0.795541	0	8.75468	2.05e-18	#ERROR!
PPP4R3A	THAP9-AS1	0.451943	0	0.881305	0	8.68725	3.71e-18	#ERROR!
PAXBP1-AS1	THAP9-AS1	0.286434	0	0.830208	0	8.6842	3.81e-18	#ERROR!
FAM66C	THAP9-AS1	0.280622	0	0.827624	0	8.66536	4.5e-18	#ERROR!
TDRP	THAP9-AS1	0.217167	3.14e-13	0.804769	0	8.65692	4.85e-18	#ERROR!
FBXO36	THAP9-AS1	0.224784	4.35e-14	0.80738	0	8.65155	5.08e-18	#ERROR!
BEND7	THAP9-AS1	0.195016	6.61e-11	0.795865	0	8.64101	5.57e-18	#ERROR!
TMED10	THAP9-AS1	0.213932	7.13e-13	0.802187	0	8.61912	6.75e-18	#ERROR!
PSMA3-AS1	THAP9-AS1	0.455576	0	0.880414	0	8.60416	7.69e-18	#ERROR!
MCTP2	THAP9-AS1	0.118095	8.51e-05	0.763367	0	8.60122	7.89e-18	#ERROR!
SPTLC3	THAP9-AS1	0.137153	4.89e-06	0.771195	0	8.59791	8.12e-18	#ERROR!
SPAG16	THAP9-AS1	0.208423	2.79e-12	0.797889	0	8.55915	1.14e-17	#ERROR!
SETDB2	THAP9-AS1	0.407689	0	0.864926	0	8.54442	1.29e-17	#ERROR!
NPAS3	THAP9-AS1	0.169327	1.55e-08	0.782011	0	8.54262	1.31e-17	#ERROR!
GDAP1	THAP9-AS1	0.159803	9.65e-08	0.778137	0	8.54157	1.32e-17	#ERROR!
BCLAF3	THAP9-AS1	0.418355	0	0.866668	0	8.48713	2.12e-17	#ERROR!
LRRC49	THAP9-AS1	0.309561	0	0.830697	0	8.45298	2.84e-17	#ERROR!
ASTE1	THAP9-AS1	0.407971	0	0.862286	0	8.44027	3.17e-17	#ERROR!
GSAP	THAP9-AS1	0.388301	0	0.855967	0	8.43296	3.37e-17	#ERROR!
EIF2AK3	THAP9-AS1	0.322418	0	0.834401	0	8.43148	3.41e-17	#ERROR!
MIPOL1	THAP9-AS1	0.223654	5.86e-14	0.798119	0	8.41011	4.1e-17	#ERROR!
KMT5B	THAP9-AS1	0.464433	0	0.878068	0	8.39467	4.67e-17	#ERROR!
NFIB	THAP9-AS1	0.25425	0	0.80828	0	8.37307	5.61e-17	#ERROR!
LZTFL1	THAP9-AS1	0.316104	0	0.830172	0	8.36608	5.96e-17	#ERROR!
FZD6	THAP9-AS1	0.309253	0	0.827384	0	8.35336	6.63e-17	#ERROR!
MLLT3	THAP9-AS1	0.256875	0	0.80846	0	8.35083	6.78e-17	#ERROR!
HDX	THAP9-AS1	0.227608	2.04e-14	0.797191	0	8.34486	7.13e-17	#ERROR!
SOWAHC	THAP9-AS1	0.271576	0	0.813603	0	8.34332	7.22e-17	#ERROR!
ALG13	THAP9-AS1	0.42449	0	0.864623	0	8.33542	7.72e-17	#ERROR!
NOL11	THAP9-AS1	0.407923	0	0.85929	0	8.3285	8.19e-17	#ERROR!
ANGEL2	THAP9-AS1	0.431036	0	0.866286	0	8.32196	8.65e-17	#ERROR!
AP3M2	THAP9-AS1	0.366689	0	0.844963	0	8.29135	1.12e-16	#ERROR!
FAM122B	THAP9-AS1	0.441913	0	0.868624	0	8.28317	1.2e-16	#ERROR!
C12orf66	THAP9-AS1	0.309078	0	0.824875	0	8.27849	1.25e-16	#ERROR!
GTF2IRD2B	THAP9-AS1	0.386124	0	0.850948	0	8.27835	1.25e-16	#ERROR!
ERMARD	THAP9-AS1	0.361654	0	0.842596	0	8.26792	1.36e-16	#ERROR!
RIN2	THAP9-AS1	0.175275	4.7e-09	0.772911	0	8.2596	1.46e-16	#ERROR!
JRKL	THAP9-AS1	0.292276	0	0.818102	0	8.25557	1.51e-16	#ERROR!
PRELID2	THAP9-AS1	0.268921	0	0.809421	0	8.25216	1.56e-16	#ERROR!
PRRC1	THAP9-AS1	0.358665	0	0.840869	0	8.24373	1.67e-16	#ERROR!
ANKRD6	THAP9-AS1	0.259595	0	0.805584	0	8.24244	1.69e-16	#ERROR!
TRIM5	THAP9-AS1	0.304667	0	0.822007	0	8.23926	1.73e-16	#ERROR!
GALNT5	THAP9-AS1	-0.0129	0.668911	0.683335	0	8.2385	1.74e-16	0/+
BBIP1	THAP9-AS1	0.387266	0	0.849971	0	8.23101	1.86e-16	#ERROR!
PIGH	THAP9-AS1	0.224921	4.17e-14	0.791687	0	8.22744	1.91e-16	#ERROR!
METTL14	THAP9-AS1	0.469861	0	0.8756	0	8.22354	1.98e-16	#ERROR!
MAGT1	THAP9-AS1	0.337177	0	0.832841	0	8.22096	2.02e-16	#ERROR!
GPBP1	THAP9-AS1	0.469404	0	0.875394	0	8.22066	2.02e-16	#ERROR!
AP4S1	THAP9-AS1	0.304978	0	0.821346	0	8.21617	2.1e-16	#ERROR!
DPH6	THAP9-AS1	0.384357	0	0.848289	0	8.20564	2.29e-16	#ERROR!
FNDC3A	THAP9-AS1	0.314621	0	0.82437	0	8.20351	2.33e-16	#ERROR!
ANKRA2	THAP9-AS1	0.357124	0	0.838729	0	8.19037	2.6e-16	#ERROR!
PGGT1B	THAP9-AS1	0.383359	0	0.847227	0	8.18035	2.83e-16	#ERROR!
SLF1	THAP9-AS1	0.396054	0	0.851276	0	8.17604	2.93e-16	#ERROR!
FLJ22447	THAP9-AS1	0.084236	0.00514	0.728346	0	8.16584	3.19e-16	#ERROR!
COG3	THAP9-AS1	0.404722	0	0.853789	0	8.16514	3.21e-16	#ERROR!
NUDT21	THAP9-AS1	0.42141	0	0.859094	0	8.16305	3.27e-16	#ERROR!
FOXP1	THAP9-AS1	0.232481	5.33e-15	0.792109	0	8.16095	3.32e-16	#ERROR!
TRAF5	THAP9-AS1	0.290962	0	0.814344	0	8.16016	3.35e-16	#ERROR!
SP110	THAP9-AS1	0.233767	3.77e-15	0.792545	0	8.15912	3.37e-16	#ERROR!
SMIM15	THAP9-AS1	0.3746	0	0.84368	0	8.15888	3.38e-16	#ERROR!
PARP2	THAP9-AS1	0.429514	0	0.861031	0	8.13921	3.98e-16	#ERROR!
SENP6	THAP9-AS1	0.511327	0	0.885834	0	8.13623	4.08e-16	#ERROR!
IQCK	THAP9-AS1	0.296595	0	0.815438	0	8.13193	4.23e-16	#ERROR!
PIGM	THAP9-AS1	0.302174	0	0.817459	0	8.13126	4.25e-16	#ERROR!
NAE1	THAP9-AS1	0.388211	0	0.847265	0	8.12628	4.43e-16	#ERROR!
TMEM123	THAP9-AS1	0.257746	0	0.800507	0	8.12283	4.55e-16	#ERROR!
API5	THAP9-AS1	0.448409	0	0.866041	0	8.10323	5.35e-16	#ERROR!
PRNP	THAP9-AS1	0.173671	6.52e-09	0.765396	0	8.09695	5.64e-16	#ERROR!
TIGD7	THAP9-AS1	0.34395	0	0.831002	0	8.08853	6.04e-16	#ERROR!
SRR	THAP9-AS1	0.190999	1.64e-10	0.771672	0	8.07176	6.93e-16	#ERROR!
HLA-F-AS1	THAP9-AS1	0.229639	1.2e-14	0.787469	0	8.07033	7.01e-16	#ERROR!
NPTN	THAP9-AS1	0.25456	0	0.797172	0	8.06643	7.24e-16	#ERROR!
FLRT3	THAP9-AS1	-0.00561	0.852412	0.677002	2.22e-16	8.05327	8.06e-16	0/+
RSPRY1	THAP9-AS1	0.365956	0	0.837456	0	8.05017	8.27e-16	#ERROR!
MDM4	THAP9-AS1	0.487554	0	0.876729	0	8.04778	8.43e-16	#ERROR!
PARP11	THAP9-AS1	0.358096	0	0.834466	0	8.04158	8.87e-16	#ERROR!
DENND2C	THAP9-AS1	0.195498	5.92e-11	0.7721	0	8.03666	9.23e-16	#ERROR!
NAALADL2	THAP9-AS1	0.146215	1.09e-06	0.750691	0	8.03478	9.37e-16	#ERROR!
TNFSF10	THAP9-AS1	0.12849	1.88e-05	0.742473	0	8.02991	9.75e-16	#ERROR!
PAPOLA	THAP9-AS1	0.397485	0	0.847429	0	8.02544	1.01e-15	#ERROR!
ITGA6	THAP9-AS1	0.149067	6.67e-07	0.751365	0	8.02147	1.04e-15	#ERROR!
EPM2AIP1	THAP9-AS1	0.389273	0	0.844236	0	8.01079	1.14e-15	#ERROR!
NECAP1	THAP9-AS1	0.40342	0	0.848725	0	8.00158	1.23e-15	#ERROR!
SUCO	THAP9-AS1	0.351672	0	0.830931	0	8.001	1.23e-15	#ERROR!
MED6	THAP9-AS1	0.397686	0	0.84664	0	7.99598	1.29e-15	#ERROR!
LOC101929295	THAP9-AS1	0.161574	6.93e-08	0.755608	0	7.99233	1.32e-15	#ERROR!
TANC1	THAP9-AS1	0.293353	0	0.809313	0	7.99144	1.33e-15	#ERROR!
SPEF2	THAP9-AS1	0.26015	0	0.79594	0	7.97553	1.52e-15	#ERROR!
CRPPA	THAP9-AS1	0.193189	1e-10	0.768475	0	7.97339	1.54e-15	#ERROR!
ANGEL1	THAP9-AS1	0.333384	0	0.823409	0	7.97084	1.58e-15	#ERROR!
GLMN	THAP9-AS1	0.457023	0	0.865318	0	7.96999	1.59e-15	#ERROR!
EFCAB11	THAP9-AS1	0.292369	0	0.808063	0	7.9668	1.63e-15	#ERROR!
PELI2	THAP9-AS1	0.135193	6.68e-06	0.742211	0	7.95798	1.75e-15	#ERROR!
GOSR1	THAP9-AS1	0.432443	0	0.857017	0	7.9555	1.78e-15	#ERROR!
LPCAT2	THAP9-AS1	0.222611	7.68e-14	0.780043	0	7.95528	1.79e-15	#ERROR!
CDK17	THAP9-AS1	0.34134	0	0.825582	0	7.94955	1.87e-15	#ERROR!
PIH1D2	THAP9-AS1	0.184029	7.52e-10	0.763484	0	7.94835	1.89e-15	#ERROR!
SEC23IP	THAP9-AS1	0.308169	0	0.813062	0	7.93972	2.03e-15	#ERROR!
COMMD2	THAP9-AS1	0.457791	0	0.86469	0	7.93631	2.08e-15	#ERROR!
TSPYL4	THAP9-AS1	0.311949	0	0.814316	0	7.93513	2.1e-15	#ERROR!
CEP57	THAP9-AS1	0.442989	0	0.859177	0	7.90836	2.61e-15	#ERROR!
MDM1	THAP9-AS1	0.484813	0	0.872365	0	7.90241	2.74e-15	#ERROR!
CAND1	THAP9-AS1	0.394727	0	0.842826	0	7.90072	2.77e-15	#ERROR!
SRSF8	THAP9-AS1	0.324425	0	0.817431	0	7.89079	3e-15	#ERROR!
C17orf75	THAP9-AS1	0.416818	0	0.84998	0	7.88889	3.05e-15	#ERROR!
TLK1	THAP9-AS1	0.461251	0	0.864275	0	7.87778	3.33e-15	#ERROR!
ORC4	THAP9-AS1	0.431135	0	0.854229	0	7.87003	3.55e-15	#ERROR!
PCNX4	THAP9-AS1	0.411106	0	0.847381	0	7.86562	3.67e-15	#ERROR!
LINC00887	THAP9-AS1	0.016746	0.578669	0.678571	0	7.86431	3.71e-15	0/+
RAPGEF6	THAP9-AS1	0.389335	0	0.839791	0	7.86172	3.79e-15	#ERROR!
ADAT2	THAP9-AS1	0.438355	0	0.856378	0	7.86131	3.8e-15	#ERROR!
DHX40	THAP9-AS1	0.330874	0	0.818766	0	7.85982	3.85e-15	#ERROR!
TRIM38	THAP9-AS1	0.360178	0	0.829404	0	7.85869	3.88e-15	#ERROR!
EDEM1	THAP9-AS1	0.331212	0	0.818637	0	7.85233	4.08e-15	#ERROR!
SUPT20H	THAP9-AS1	0.473293	0	0.867354	0	7.84756	4.24e-15	#ERROR!
ARHGAP12	THAP9-AS1	0.402684	0	0.843955	0	7.84681	4.27e-15	#ERROR!
MGAT4A	THAP9-AS1	0.209015	2.41e-12	0.768551	0	7.81501	5.5e-15	#ERROR!
NIPAL2	THAP9-AS1	0.213972	7.06e-13	0.77038	0	7.80814	5.8e-15	#ERROR!
SIMC1	THAP9-AS1	0.223452	6.17e-14	0.774304	0	7.8059	5.91e-15	#ERROR!
COIL	THAP9-AS1	0.425315	0	0.85045	0	7.80505	5.95e-15	#ERROR!
RUNX2	THAP9-AS1	0.087196	0.00377	0.711862	0	7.80426	5.99e-15	#ERROR!
RBM26	THAP9-AS1	0.523311	0	0.881698	0	7.79382	6.5e-15	#ERROR!
LINC01184	THAP9-AS1	0.276667	0	0.795523	0	7.79161	6.62e-15	#ERROR!
KLHL9	THAP9-AS1	0.388826	0	0.837367	0	7.78823	6.8e-15	#ERROR!
ATP8B1	THAP9-AS1	0.20123	1.57e-11	0.764011	0	7.78712	6.86e-15	#ERROR!
DDX52	THAP9-AS1	0.429624	0	0.851318	0	7.7844	7e-15	#ERROR!
CBR4	THAP9-AS1	0.37057	0	0.830561	0	7.77829	7.35e-15	#ERROR!
CNTN1	THAP9-AS1	0.045174	0.133958	0.688681	0	7.77228	7.71e-15	0/+
INPP5F	THAP9-AS1	0.356352	0	0.825113	0	7.76925	7.9e-15	#ERROR!
PDS5B	THAP9-AS1	0.354784	0	0.824538	0	7.76922	7.9e-15	#ERROR!
MTX3	THAP9-AS1	0.39255	0	0.837741	0	7.7577	8.65e-15	#ERROR!
C5orf34	THAP9-AS1	0.447858	0	0.856679	0	7.75745	8.67e-15	#ERROR!
PRPF40A	THAP9-AS1	0.495527	0	0.872113	0	7.75518	8.82e-15	#ERROR!
GNPNAT1	THAP9-AS1	0.309915	0	0.807196	0	7.75517	8.82e-15	#ERROR!
TMEM39A	THAP9-AS1	0.420399	0	0.847265	0	7.75249	9.01e-15	#ERROR!
TPTEP1	THAP9-AS1	0.161665	6.81e-08	0.74455	0	7.74585	9.49e-15	#ERROR!
CHAMP1	THAP9-AS1	0.378018	0	0.832153	0	7.74425	9.61e-15	#ERROR!
ETAA1	THAP9-AS1	0.466166	0	0.862276	0	7.74073	9.88e-15	#ERROR!
MAP3K13	THAP9-AS1	0.345987	0	0.820323	0	7.74012	9.93e-15	#ERROR!
LINC00472	THAP9-AS1	0.167682	2.15e-08	0.74694	0	7.73807	1.01e-14	#ERROR!
TADA2A	THAP9-AS1	0.497711	0	0.872277	0	7.7337	1.04e-14	#ERROR!
GPRASP2	THAP9-AS1	0.222961	7.02e-14	0.771045	0	7.73237	1.06e-14	#ERROR!
SLC22A15	THAP9-AS1	0.20239	1.19e-11	0.76195	0	7.72746	1.1e-14	#ERROR!
GPALPP1	THAP9-AS1	0.451118	0	0.856902	0	7.72592	1.11e-14	#ERROR!
N4BP1	THAP9-AS1	0.369082	0	0.828326	0	7.72549	1.11e-14	#ERROR!
ELP2	THAP9-AS1	0.212697	9.71e-13	0.766256	0	7.72336	1.13e-14	#ERROR!
DDX20	THAP9-AS1	0.493361	0	0.870587	0	7.72146	1.15e-14	#ERROR!
LRIG3	THAP9-AS1	0.182543	1.03e-09	0.752794	0	7.71906	1.17e-14	#ERROR!
SH3TC2	THAP9-AS1	0.181955	1.17e-09	0.752485	0	7.71806	1.18e-14	#ERROR!
FAM120B	THAP9-AS1	0.361469	0	0.825299	0	7.71787	1.18e-14	#ERROR!
BBS4	THAP9-AS1	0.301175	0	0.802349	0	7.71519	1.21e-14	#ERROR!
NUP43	THAP9-AS1	0.44014	0	0.852876	0	7.71367	1.22e-14	#ERROR!
CFAP94	THAP9-AS1	0.145113	1.32e-06	0.735251	0	7.71089	1.25e-14	#ERROR!
HPS3	THAP9-AS1	0.339746	0	0.816967	0	7.70998	1.26e-14	#ERROR!
RIC3	THAP9-AS1	0.118957	7.54e-05	0.72268	0	7.70887	1.27e-14	#ERROR!
ECT2L	THAP9-AS1	0.147681	8.48e-07	0.736149	0	7.70443	1.31e-14	#ERROR!
ARFGAP3	THAP9-AS1	0.239378	8.88e-16	0.776738	0	7.70178	1.34e-14	#ERROR!
DYNC2LI1	THAP9-AS1	0.381245	0	0.831807	0	7.6967	1.4e-14	#ERROR!
CFAP69	THAP9-AS1	0.263738	0	0.7866	0	7.69547	1.41e-14	#ERROR!
TTC8	THAP9-AS1	0.265962	0	0.787499	0	7.69517	1.41e-14	#ERROR!
STRADA	THAP9-AS1	0.383713	0	0.832542	0	7.69186	1.45e-14	#ERROR!
POC5	THAP9-AS1	0.440615	0	0.852418	0	7.69166	1.45e-14	#ERROR!
RBBP9	THAP9-AS1	0.328505	0	0.812063	0	7.69136	1.46e-14	#ERROR!
DCAF16	THAP9-AS1	0.517104	0	0.877311	0	7.68832	1.49e-14	#ERROR!
TC2N	THAP9-AS1	0.130507	1.39e-05	0.726899	0	7.68124	1.58e-14	#ERROR!
KTN1-AS1	THAP9-AS1	0.194692	7.12e-11	0.75635	0	7.67692	1.63e-14	#ERROR!
TMEM168	THAP9-AS1	0.488305	0	0.867694	0	7.67127	1.7e-14	#ERROR!
CTR9	THAP9-AS1	0.378716	0	0.830041	0	7.67002	1.72e-14	#ERROR!
MAP2K4	THAP9-AS1	0.275885	0	0.790416	0	7.66621	1.77e-14	#ERROR!
IFT88	THAP9-AS1	0.338976	0	0.815035	0	7.66227	1.83e-14	#ERROR!
MAK16	THAP9-AS1	0.395729	0	0.835872	0	7.66059	1.85e-14	#ERROR!
KDM6A	THAP9-AS1	0.349412	0	0.818852	0	7.65875	1.88e-14	#ERROR!
SUGT1P3	THAP9-AS1	0.29994	0	0.799571	0	7.65311	1.96e-14	#ERROR!
L3MBTL4	THAP9-AS1	0.169705	1.44e-08	0.743924	0	7.65192	1.98e-14	#ERROR!
HEATR6	THAP9-AS1	0.319147	0	0.806725	0	7.64254	2.13e-14	#ERROR!
CD47	THAP9-AS1	0.396237	0	0.835407	0	7.63977	2.18e-14	#ERROR!
ANKRD42	THAP9-AS1	0.208094	3.02e-12	0.760597	0	7.63838	2.2e-14	#ERROR!
NUP133	THAP9-AS1	0.396936	0	0.835593	0	7.63771	2.21e-14	#ERROR!
SERP1	THAP9-AS1	0.281638	0	0.791587	0	7.636	2.24e-14	#ERROR!
MEIS2	THAP9-AS1	0.153756	2.91e-07	0.73564	0	7.63325	2.29e-14	#ERROR!
DDX58	THAP9-AS1	0.243314	2.22e-16	0.775594	0	7.63325	2.29e-14	#ERROR!
CDC42SE2	THAP9-AS1	0.405165	0	0.838354	0	7.63201	2.31e-14	#ERROR!
PROSER1	THAP9-AS1	0.438895	0	0.850009	0	7.62742	2.39e-14	#ERROR!
ARFGEF1	THAP9-AS1	0.335573	0	0.812472	0	7.62587	2.42e-14	#ERROR!
BBOF1	THAP9-AS1	0.231254	7.55e-15	0.770018	0	7.62291	2.48e-14	#ERROR!
NEXMIF	THAP9-AS1	0.151456	4.39e-07	0.73403	0	7.62215	2.49e-14	#ERROR!
ANKRD13A	THAP9-AS1	0.430265	0	0.846793	0	7.6193	2.55e-14	#ERROR!
ANKRD49	THAP9-AS1	0.466994	0	0.859147	0	7.61321	2.67e-14	#ERROR!
SEPTIN7P2	THAP9-AS1	0.525001	0	0.877984	0	7.61149	2.71e-14	#ERROR!
SEH1L	THAP9-AS1	0.426821	0	0.845247	0	7.60742	2.8e-14	#ERROR!
PRDM2	THAP9-AS1	0.37619	0	0.82701	0	7.60471	2.86e-14	#ERROR!
CCDC122	THAP9-AS1	0.326143	0	0.808023	0	7.60291	2.9e-14	#ERROR!
POLR1F	THAP9-AS1	0.436724	0	0.848361	0	7.59611	3.05e-14	#ERROR!
MAML2	THAP9-AS1	0.214505	6.17e-13	0.761541	0	7.59499	3.08e-14	#ERROR!
PLCB1	THAP9-AS1	0.155039	2.31e-07	0.734267	0	7.5915	3.16e-14	#ERROR!
DUBR	THAP9-AS1	0.243862	2.22e-16	0.774048	0	7.59002	3.2e-14	#ERROR!
NUP50	THAP9-AS1	0.4262	0	0.84449	0	7.58913	3.22e-14	#ERROR!
TSPYL5	THAP9-AS1	0.113933	0.000151	0.714171	0	7.58752	3.26e-14	#ERROR!
ACVR2A	THAP9-AS1	0.315864	0	0.803398	0	7.58619	3.29e-14	#ERROR!
NVL	THAP9-AS1	0.321995	0	0.80566	0	7.58217	3.4e-14	#ERROR!
TM9SF2	THAP9-AS1	0.317538	0	0.803888	0	7.58156	3.41e-14	#ERROR!
PRPF4B	THAP9-AS1	0.477166	0	0.861641	0	7.57935	3.47e-14	#ERROR!
LRIF1	THAP9-AS1	0.408045	0	0.837687	0	7.57673	3.54e-14	#ERROR!
IFIH1	THAP9-AS1	0.2558	0	0.778514	0	7.5755	3.58e-14	#ERROR!
STXBP4	THAP9-AS1	0.258411	0	0.779564	0	7.5743	3.61e-14	#ERROR!
AFTPH	THAP9-AS1	0.448692	0	0.851835	0	7.57319	3.64e-14	#ERROR!
TLR5	THAP9-AS1	0.319339	0	0.804269	0	7.57255	3.66e-14	#ERROR!
MID1	THAP9-AS1	0.148811	6.98e-07	0.730366	0	7.57171	3.68e-14	#ERROR!
PUS7L	THAP9-AS1	0.435664	0	0.847277	0	7.57138	3.69e-14	#ERROR!
SP3	THAP9-AS1	0.449229	0	0.851966	0	7.57131	3.69e-14	#ERROR!
LINS1	THAP9-AS1	0.446103	0	0.850822	0	7.56889	3.76e-14	#ERROR!
ANKHD1-EIF4EBP3	THAP9-AS1	0.179927	1.8e-09	0.744559	0	7.56333	3.93e-14	#ERROR!
FAM13B	THAP9-AS1	0.417184	0	0.840509	0	7.5624	3.96e-14	#ERROR!
CD2AP	THAP9-AS1	0.391767	0	0.8312	0	7.55746	4.11e-14	#ERROR!
STXBP3	THAP9-AS1	0.477625	0	0.861211	0	7.55737	4.11e-14	#ERROR!
SARAF	THAP9-AS1	0.178514	2.41e-09	0.743325	0	7.55068	4.33e-14	#ERROR!
PEX3	THAP9-AS1	0.357704	0	0.818298	0	7.5504	4.34e-14	#ERROR!
BDH2	THAP9-AS1	0.365409	0	0.820979	0	7.54364	4.57e-14	#ERROR!
FBXO5	THAP9-AS1	0.401496	0	0.834258	0	7.54223	4.62e-14	#ERROR!
PRPF39	THAP9-AS1	0.592589	0	0.897274	0	7.5408	4.67e-14	#ERROR!
MFSD8	THAP9-AS1	0.54102	0	0.881336	0	7.53808	4.77e-14	#ERROR!
HERC6	THAP9-AS1	0.229056	1.38e-14	0.765458	0	7.53757	4.79e-14	#ERROR!
LINC00662	THAP9-AS1	0.371807	0	0.823165	0	7.53723	4.8e-14	#ERROR!
EIF4ENIF1	THAP9-AS1	0.402326	0	0.834365	0	7.53602	4.85e-14	#ERROR!
RBBP7	THAP9-AS1	0.286372	0	0.789584	0	7.53412	4.92e-14	#ERROR!
CACUL1	THAP9-AS1	0.385799	0	0.82808	0	7.52853	5.13e-14	#ERROR!
NSUN3	THAP9-AS1	0.418226	0	0.839729	0	7.52437	5.3e-14	#ERROR!
GAS1RR	THAP9-AS1	0.153425	3.09e-07	0.730143	0	7.5212	5.43e-14	#ERROR!
EOGT	THAP9-AS1	0.277711	0	0.785426	0	7.51916	5.51e-14	#ERROR!
CTDSPL	THAP9-AS1	0.297866	0	0.793693	0	7.51897	5.52e-14	#ERROR!
CANX	THAP9-AS1	0.298559	0	0.793949	0	7.51831	5.55e-14	#ERROR!
DNAJC10	THAP9-AS1	0.352854	0	0.815235	0	7.51494	5.69e-14	#ERROR!
AHI1	THAP9-AS1	0.431077	0	0.843975	0	7.51367	5.75e-14	#ERROR!
NUS1	THAP9-AS1	0.407151	0	0.835316	0	7.51046	5.89e-14	#ERROR!
TTC30A	THAP9-AS1	0.260653	0	0.77785	0	7.50866	5.97e-14	#ERROR!
TTC39B	THAP9-AS1	0.271204	0	0.782268	0	7.50798	6e-14	#ERROR!
TMF1	THAP9-AS1	0.363488	0	0.819022	0	7.50715	6.04e-14	#ERROR!
RNMT	THAP9-AS1	0.43758	0	0.84603	0	7.50562	6.11e-14	#ERROR!
IFT74	THAP9-AS1	0.401851	0	0.83319	0	7.50406	6.19e-14	#ERROR!
SLC39A9	THAP9-AS1	0.272664	0	0.782577	0	7.5004	6.36e-14	#ERROR!
BBS2	THAP9-AS1	0.38216	0	0.825804	0	7.50005	6.38e-14	#ERROR!
TRIM33	THAP9-AS1	0.451477	0	0.850677	0	7.49845	6.46e-14	#ERROR!
TEFM	THAP9-AS1	0.47949	0	0.860224	0	7.4969	6.53e-14	#ERROR!
NAP1L2	THAP9-AS1	0.12705	2.34e-05	0.716115	0	7.49688	6.54e-14	#ERROR!
DNAI4	THAP9-AS1	0.180947	1.45e-09	0.741864	0	7.49461	6.65e-14	#ERROR!
TUBD1	THAP9-AS1	0.413855	0	0.837203	0	7.4931	6.73e-14	#ERROR!
NAPB	THAP9-AS1	0.449219	0	0.849599	0	7.48818	6.98e-14	#ERROR!
N4BP2L2	THAP9-AS1	0.471461	0	0.85724	0	7.48727	7.03e-14	#ERROR!
BHLHB9	THAP9-AS1	0.279348	0	0.78482	0	7.48661	7.07e-14	#ERROR!
GZF1	THAP9-AS1	0.412888	0	0.836565	0	7.48376	7.22e-14	#ERROR!
DHX36	THAP9-AS1	0.42265	0	0.840022	0	7.48183	7.33e-14	#ERROR!
SLC35A3	THAP9-AS1	0.346915	0	0.811747	0	7.48051	7.4e-14	#ERROR!
RABL2B	THAP9-AS1	0.370364	0	0.820618	0	7.47726	7.59e-14	#ERROR!
EXOSC8	THAP9-AS1	0.461584	0	0.853429	0	7.47199	7.9e-14	#ERROR!
CYP2R1	THAP9-AS1	0.430647	0	0.842546	0	7.47076	7.97e-14	#ERROR!
INTS6L	THAP9-AS1	0.329181	0	0.804298	0	7.46653	8.23e-14	#ERROR!
TIPIN	THAP9-AS1	0.407461	0	0.833752	0	7.45682	8.86e-14	#ERROR!
AK7	THAP9-AS1	0.110675	0.000232	0.705678	0	7.45325	9.11e-14	#ERROR!
TMEM231	THAP9-AS1	0.288746	0	0.787364	0	7.45198	9.2e-14	#ERROR!
GK5	THAP9-AS1	0.390411	0	0.82719	0	7.44836	9.45e-14	#ERROR!
FRS2	THAP9-AS1	0.289521	0	0.787171	0	7.43883	1.02e-13	#ERROR!
POGLUT1	THAP9-AS1	0.409127	0	0.833762	0	7.43769	1.02e-13	#ERROR!
SP140L	THAP9-AS1	0.206463	4.49e-12	0.75095	0	7.4364	1.03e-13	#ERROR!
RRAGB	THAP9-AS1	0.360116	0	0.815277	0	7.43534	1.04e-13	#ERROR!
AP1G1	THAP9-AS1	0.351216	0	0.811825	0	7.43516	1.04e-13	#ERROR!
GNB5	THAP9-AS1	0.181581	1.27e-09	0.739246	0	7.43194	1.07e-13	#ERROR!
RAB27A	THAP9-AS1	0.262786	0	0.775548	0	7.43005	1.09e-13	#ERROR!
CAPS2	THAP9-AS1	0.321462	0	0.79972	0	7.42574	1.12e-13	#ERROR!
SREK1	THAP9-AS1	0.467648	0	0.854175	0	7.4236	1.14e-13	#ERROR!
CDK13	THAP9-AS1	0.4587	0	0.851023	0	7.42213	1.15e-13	#ERROR!
TENT2	THAP9-AS1	0.433986	0	0.84227	0	7.42164	1.16e-13	#ERROR!
RAB14	THAP9-AS1	0.39377	0	0.827372	0	7.4154	1.21e-13	#ERROR!
LEMD3	THAP9-AS1	0.416395	0	0.835697	0	7.4146	1.22e-13	#ERROR!
KIAA1328	THAP9-AS1	0.38306	0	0.823197	0	7.41074	1.26e-13	#ERROR!
DENND1B	THAP9-AS1	0.237553	1.33e-15	0.763711	0	7.40944	1.27e-13	#ERROR!
RASA1	THAP9-AS1	0.323973	0	0.799866	0	7.40246	1.34e-13	#ERROR!
SERPINI1	THAP9-AS1	0.053212	0.077447	0.672144	4.44e-16	7.39488	1.42e-13	0/+
COG2	THAP9-AS1	0.328955	0	0.801532	0	7.39338	1.43e-13	#ERROR!
MCC	THAP9-AS1	0.185592	5.37e-10	0.739291	0	7.3926	1.44e-13	#ERROR!
TRAPPC13	THAP9-AS1	0.410477	0	0.832796	0	7.39125	1.45e-13	#ERROR!
NTN4	THAP9-AS1	0.067624	0.024774	0.67964	0	7.38844	1.49e-13	#ERROR!
FAM169A	THAP9-AS1	0.11725	9.57e-05	0.705629	0	7.3876	1.5e-13	#ERROR!
ERLIN2	THAP9-AS1	0.293544	0	0.786644	0	7.3827	1.55e-13	#ERROR!
NICN1	THAP9-AS1	0.305076	0	0.791161	0	7.37585	1.63e-13	#ERROR!
BUB3	THAP9-AS1	0.375153	0	0.818905	0	7.37251	1.67e-13	#ERROR!
NOC3L	THAP9-AS1	0.489084	0	0.860135	0	7.37183	1.68e-13	#ERROR!
PHF12	THAP9-AS1	0.371903	0	0.817508	0	7.36812	1.73e-13	#ERROR!
EML4	THAP9-AS1	0.397032	0	0.827044	0	7.36775	1.74e-13	#ERROR!
SRRM1	THAP9-AS1	0.533145	0	0.874764	0	7.36681	1.75e-13	#ERROR!
CASP1	THAP9-AS1	0.171797	9.51e-09	0.731096	0	7.35778	1.87e-13	#ERROR!
FANCL	THAP9-AS1	0.518407	0	0.869667	0	7.35769	1.87e-13	#ERROR!
MBIP	THAP9-AS1	0.407965	0	0.830786	0	7.35721	1.88e-13	#ERROR!
EDA2R	THAP9-AS1	0.187614	3.45e-10	0.738424	0	7.35371	1.93e-13	#ERROR!
POC1B	THAP9-AS1	0.416066	0	0.833645	0	7.35277	1.94e-13	#ERROR!
CTDSPL2	THAP9-AS1	0.462492	0	0.850254	0	7.34838	2.01e-13	#ERROR!
SNX30	THAP9-AS1	0.313929	0	0.79372	0	7.34756	2.02e-13	#ERROR!
RPGRIP1L	THAP9-AS1	0.317107	0	0.79495	0	7.34564	2.05e-13	#ERROR!
SS18	THAP9-AS1	0.479201	0	0.855926	0	7.3422	2.1e-13	#ERROR!
NDC1	THAP9-AS1	0.415874	0	0.833121	0	7.33834	2.16e-13	#ERROR!
SH3BGRL	THAP9-AS1	0.109035	0.000288	0.698724	0	7.33615	2.2e-13	#ERROR!
DEK	THAP9-AS1	0.393289	0	0.824586	0	7.33576	2.2e-13	#ERROR!
TASP1	THAP9-AS1	0.427628	0	0.837363	0	7.33575	2.2e-13	#ERROR!
FLVCR1	THAP9-AS1	0.375522	0	0.817641	0	7.33119	2.28e-13	#ERROR!
ASB7	THAP9-AS1	0.443185	0	0.842862	0	7.33086	2.29e-13	#ERROR!
GPD2	THAP9-AS1	0.274441	0	0.776451	0	7.3301	2.3e-13	#ERROR!
TOGARAM1	THAP9-AS1	0.316967	0	0.794256	0	7.32888	2.32e-13	#ERROR!
PPIEL	THAP9-AS1	0.231557	7.11e-15	0.757522	0	7.32845	2.33e-13	#ERROR!
ENDOD1	THAP9-AS1	0.169881	1.39e-08	0.728662	0	7.32636	2.36e-13	#ERROR!
TRAM1L1	THAP9-AS1	0.325918	0	0.79776	0	7.32481	2.39e-13	#ERROR!
RSBN1	THAP9-AS1	0.434602	0	0.839559	0	7.32435	2.4e-13	#ERROR!
RXYLT1	THAP9-AS1	0.413738	0	0.831775	0	7.32081	2.46e-13	#ERROR!
PRIM1	THAP9-AS1	0.383348	0	0.820176	0	7.31712	2.53e-13	#ERROR!
REPS1	THAP9-AS1	0.378137	0	0.818069	0	7.31414	2.59e-13	#ERROR!
MAGOHB	THAP9-AS1	0.413441	0	0.831236	0	7.30735	2.72e-13	#ERROR!
GPATCH2	THAP9-AS1	0.364508	0	0.812389	0	7.30318	2.81e-13	#ERROR!
BDNF-AS	THAP9-AS1	0.364455	0	0.812284	0	7.30077	2.86e-13	#ERROR!
AVL9	THAP9-AS1	0.386404	0	0.820703	0	7.29796	2.92e-13	#ERROR!
APH1B	THAP9-AS1	0.218287	2.36e-13	0.749877	0	7.29228	3.05e-13	#ERROR!
MIER3	THAP9-AS1	0.372713	0	0.815166	0	7.29082	3.08e-13	#ERROR!
ANKRD10	THAP9-AS1	0.448714	0	0.84364	0	7.28998	3.1e-13	#ERROR!
TRMT9B	THAP9-AS1	0.178233	2.56e-09	0.730906	0	7.28931	3.12e-13	#ERROR!
TOP2B	THAP9-AS1	0.4194	0	0.832805	0	7.28684	3.17e-13	#ERROR!
CRNKL1	THAP9-AS1	0.342534	0	0.803052	0	7.28615	3.19e-13	#ERROR!
ADAM10	THAP9-AS1	0.312163	0	0.790586	0	7.28487	3.22e-13	#ERROR!
DDX18	THAP9-AS1	0.453392	0	0.845077	0	7.28156	3.3e-13	#ERROR!
TUBGCP3	THAP9-AS1	0.46092	0	0.847713	0	7.2794	3.35e-13	#ERROR!
SLFN13	THAP9-AS1	0.225605	3.49e-14	0.752583	0	7.27785	3.39e-13	#ERROR!
TADA1	THAP9-AS1	0.488747	0	0.857462	0	7.27722	3.41e-13	#ERROR!
EAPP	THAP9-AS1	0.302259	0	0.786123	0	7.27654	3.42e-13	#ERROR!
EBLN3P	THAP9-AS1	0.439312	0	0.839761	0	7.27447	3.48e-13	#ERROR!
RERG	THAP9-AS1	0.176789	3.45e-09	0.729394	0	7.27236	3.53e-13	#ERROR!
TIAL1	THAP9-AS1	0.552919	0	0.87896	0	7.27076	3.57e-13	#ERROR!
GSTCD	THAP9-AS1	0.388741	0	0.820645	0	7.26953	3.61e-13	#ERROR!
NME5	THAP9-AS1	0.129333	1.66e-05	0.705627	0	7.2684	3.64e-13	#ERROR!
TRUB1	THAP9-AS1	0.364494	0	0.81116	0	7.26835	3.64e-13	#ERROR!
MTAP	THAP9-AS1	0.433803	0	0.837544	0	7.26799	3.65e-13	#ERROR!
TCF12	THAP9-AS1	0.328892	0	0.796725	0	7.26486	3.73e-13	#ERROR!
KDM4C	THAP9-AS1	0.463768	0	0.848257	0	7.263	3.79e-13	#ERROR!
MRE11	THAP9-AS1	0.440811	0	0.83996	0	7.26298	3.79e-13	#ERROR!
MTMR7	THAP9-AS1	0.255271	0	0.765179	0	7.26053	3.86e-13	#ERROR!
STX16	THAP9-AS1	0.506117	0	0.863011	0	7.26035	3.86e-13	#ERROR!
GCC2	THAP9-AS1	0.368823	0	0.812349	0	7.25362	4.06e-13	#ERROR!
CCDC47	THAP9-AS1	0.245121	0	0.760352	0	7.2536	4.06e-13	#ERROR!
SLC35A1	THAP9-AS1	0.359106	0	0.80844	0	7.25179	4.11e-13	#ERROR!
MTF2	THAP9-AS1	0.536444	0	0.87297	0	7.2482	4.22e-13	#ERROR!
RBM39	THAP9-AS1	0.578835	0	0.886766	0	7.24426	4.35e-13	#ERROR!
CDC23	THAP9-AS1	0.479315	0	0.853113	0	7.23951	4.5e-13	#ERROR!
TBP	THAP9-AS1	0.525216	0	0.86894	0	7.23793	4.56e-13	#ERROR!
NEK5	THAP9-AS1	0.172427	8.38e-09	0.725448	0	7.23464	4.67e-13	#ERROR!
PRIM2	THAP9-AS1	0.423383	0	0.832626	0	7.23413	4.69e-13	#ERROR!
MAP3K7	THAP9-AS1	0.490341	0	0.856821	0	7.23341	4.71e-13	#ERROR!
ETNK1	THAP9-AS1	0.407686	0	0.826677	0	7.23301	4.72e-13	#ERROR!
C2CD5	THAP9-AS1	0.448747	0	0.841942	0	7.23263	4.74e-13	#ERROR!
SUPT3H	THAP9-AS1	0.355477	0	0.806147	0	7.22826	4.89e-13	#ERROR!
DSG2	THAP9-AS1	0.342138	0	0.800678	0	7.22594	4.98e-13	#ERROR!
ERBIN	THAP9-AS1	0.352981	0	0.804959	0	7.22312	5.08e-13	#ERROR!
PRKCE	THAP9-AS1	0.26344	0	0.767151	0	7.22185	5.13e-13	#ERROR!
ASCC3	THAP9-AS1	0.322321	0	0.792336	0	7.22064	5.17e-13	#ERROR!
METTL25	THAP9-AS1	0.357582	0	0.806589	0	7.2171	5.31e-13	#ERROR!
MYOF	THAP9-AS1	0.22813	1.78e-14	0.751008	0	7.21683	5.32e-13	#ERROR!
GPR199P	THAP9-AS1	0.354425	0	0.805263	0	7.21548	5.37e-13	#ERROR!
SLC18B1	THAP9-AS1	0.237827	1.33e-15	0.755345	0	7.21458	5.41e-13	#ERROR!
KIN	THAP9-AS1	0.530098	0	0.869934	0	7.21176	5.52e-13	#ERROR!
SRP54	THAP9-AS1	0.304641	0	0.78454	0	7.21096	5.56e-13	#ERROR!
HNRNPH1	THAP9-AS1	0.566476	0	0.881842	0	7.20348	5.87e-13	#ERROR!
EFCAB7	THAP9-AS1	0.459754	0	0.84499	0	7.20054	6e-13	#ERROR!
FAM126A	THAP9-AS1	0.241425	4.44e-16	0.756347	0	7.20019	6.01e-13	#ERROR!
PIGN	THAP9-AS1	0.329133	0	0.794317	0	7.19854	6.09e-13	#ERROR!
TMX4	THAP9-AS1	0.237439	1.33e-15	0.754438	0	7.1981	6.11e-13	#ERROR!
PPIL6	THAP9-AS1	0.23243	5.55e-15	0.752061	0	7.1962	6.19e-13	#ERROR!
NUP107	THAP9-AS1	0.507364	0	0.861717	0	7.19501	6.25e-13	#ERROR!
PHOSPHO2	THAP9-AS1	0.292411	0	0.778615	0	7.19346	6.32e-13	#ERROR!
DCAF13	THAP9-AS1	0.343082	0	0.799855	0	7.19332	6.32e-13	#ERROR!
GMPS	THAP9-AS1	0.366249	0	0.809174	0	7.19254	6.36e-13	#ERROR!
RNF111	THAP9-AS1	0.367592	0	0.809671	0	7.19145	6.41e-13	#ERROR!
DCDC1	THAP9-AS1	0.103893	0.000552	0.688229	0	7.19027	6.47e-13	#ERROR!
FAM76B	THAP9-AS1	0.493691	0	0.856762	0	7.1883	6.56e-13	#ERROR!
TGS1	THAP9-AS1	0.419618	0	0.829727	0	7.18754	6.6e-13	#ERROR!
SLC25A13	THAP9-AS1	0.330004	0	0.79422	0	7.1865	6.65e-13	#ERROR!
ANKMY2	THAP9-AS1	0.261809	0	0.764904	0	7.18605	6.67e-13	#ERROR!
RUFY2	THAP9-AS1	0.437747	0	0.836466	0	7.18574	6.68e-13	#ERROR!
MYO5C	THAP9-AS1	0.277766	0	0.771893	0	7.18465	6.74e-13	#ERROR!
GALNT3	THAP9-AS1	0.134137	7.9e-06	0.703675	0	7.18326	6.81e-13	#ERROR!
C3orf33	THAP9-AS1	0.261227	0	0.764495	0	7.18255	6.84e-13	#ERROR!
CNOT2	THAP9-AS1	0.484594	0	0.853339	0	7.18079	6.93e-13	#ERROR!
PCBP1-AS1	THAP9-AS1	0.413163	0	0.827009	0	7.17924	7.01e-13	#ERROR!
PLPP5	THAP9-AS1	0.285347	0	0.7749	0	7.17734	7.11e-13	#ERROR!
FRMD6	THAP9-AS1	0.188188	3.05e-10	0.730197	0	7.17451	7.26e-13	#ERROR!
PHF11	THAP9-AS1	0.367651	0	0.80908	0	7.17416	7.28e-13	#ERROR!
SPRED1	THAP9-AS1	0.255679	0	0.761602	0	7.17304	7.34e-13	#ERROR!
PRMT3	THAP9-AS1	0.438082	0	0.836136	0	7.17107	7.44e-13	#ERROR!
ODF2L	THAP9-AS1	0.448814	0	0.840107	0	7.17093	7.45e-13	#ERROR!
LAMP2	THAP9-AS1	0.294074	0	0.778392	0	7.17028	7.48e-13	#ERROR!
TMEM87B	THAP9-AS1	0.284067	0	0.774046	0	7.17015	7.49e-13	#ERROR!
ARAP2	THAP9-AS1	0.255437	0	0.761324	0	7.16912	7.55e-13	#ERROR!
TRIB2	THAP9-AS1	0.195856	5.46e-11	0.733564	0	7.16762	7.63e-13	#ERROR!
ADNP	THAP9-AS1	0.458857	0	0.843626	0	7.16543	7.75e-13	#ERROR!
SRSF10	THAP9-AS1	0.587704	0	0.887872	0	7.16423	7.82e-13	#ERROR!
SCAMP1	THAP9-AS1	0.33361	0	0.794816	0	7.16284	7.9e-13	#ERROR!
SIN3A	THAP9-AS1	0.400073	0	0.821367	0	7.1607	8.03e-13	#ERROR!
FBXO4	THAP9-AS1	0.304314	0	0.782389	0	7.16036	8.05e-13	#ERROR!
TCERG1	THAP9-AS1	0.613803	0	0.896108	0	7.1591	8.12e-13	#ERROR!
HECTD2	THAP9-AS1	0.34537	0	0.799508	0	7.15877	8.14e-13	#ERROR!
SPATA6L	THAP9-AS1	0.182787	9.8e-10	0.726761	0	7.15773	8.2e-13	#ERROR!
MFN1	THAP9-AS1	0.429483	0	0.832468	0	7.15671	8.26e-13	#ERROR!
NUDT10	THAP9-AS1	0.057242	0.057483	0.660533	1.78e-15	7.15279	8.5e-13	0/+
BIVM	THAP9-AS1	0.323056	0	0.79002	0	7.15254	8.52e-13	#ERROR!
GUCY1A1	THAP9-AS1	0.189343	2.36e-10	0.729681	0	7.15216	8.54e-13	#ERROR!
METTL16	THAP9-AS1	0.390723	0	0.817378	0	7.15044	8.65e-13	#ERROR!
PIBF1	THAP9-AS1	0.434449	0	0.834052	0	7.14776	8.82e-13	#ERROR!
TUG1	THAP9-AS1	0.450442	0	0.839977	0	7.14682	8.88e-13	#ERROR!
RNF216P1	THAP9-AS1	0.364952	0	0.806973	0	7.14548	8.97e-13	#ERROR!
EXOSC3	THAP9-AS1	0.426706	0	0.830998	0	7.14343	9.1e-13	#ERROR!
TTC26	THAP9-AS1	0.41881	0	0.827976	0	7.1427	9.15e-13	#ERROR!
RSBN1L	THAP9-AS1	0.495718	0	0.856221	0	7.1425	9.17e-13	#ERROR!
ALKBH1	THAP9-AS1	0.305491	0	0.782161	0	7.14203	9.2e-13	#ERROR!
TERF1	THAP9-AS1	0.420256	0	0.828474	0	7.14107	9.26e-13	#ERROR!
CMTM6	THAP9-AS1	0.339389	0	0.796361	0	7.14044	9.3e-13	#ERROR!
PPP6R3	THAP9-AS1	0.445422	0	0.837877	0	7.13895	9.4e-13	#ERROR!
CTPS2	THAP9-AS1	0.3268	0	0.791019	0	7.13774	9.49e-13	#ERROR!
ALG6	THAP9-AS1	0.439488	0	0.835444	0	7.13185	9.9e-13	#ERROR!
EPC2	THAP9-AS1	0.442412	0	0.836477	0	7.12993	1e-12	#ERROR!
PPIP5K2	THAP9-AS1	0.44621	0	0.837822	0	7.12763	1.02e-12	#ERROR!
MOB3B	THAP9-AS1	0.235591	2.22e-15	0.750385	0	7.12636	1.03e-12	#ERROR!
LINC00271	THAP9-AS1	0.184428	6.9e-10	0.72585	0	7.1225	1.06e-12	#ERROR!
NR2C1	THAP9-AS1	0.410726	0	0.824202	0	7.12212	1.06e-12	#ERROR!
PDPK1	THAP9-AS1	0.372111	0	0.808975	0	7.12101	1.07e-12	#ERROR!
BTRC	THAP9-AS1	0.294207	0	0.776441	0	7.12098	1.07e-12	#ERROR!
CCNJ	THAP9-AS1	0.428664	0	0.831011	0	7.12056	1.07e-12	#ERROR!
FGFR2	THAP9-AS1	0.186592	4.32e-10	0.726687	0	7.11794	1.1e-12	#ERROR!
DCAF17	THAP9-AS1	0.464726	0	0.844298	0	7.11567	1.11e-12	#ERROR!
FAM91A1	THAP9-AS1	0.397066	0	0.818526	0	7.11121	1.15e-12	#ERROR!
TVP23B	THAP9-AS1	0.365748	0	0.806013	0	7.10987	1.16e-12	#ERROR!
LIFR-AS1	THAP9-AS1	0.147949	8.1e-07	0.706899	0	7.1087	1.17e-12	#ERROR!
PUS7	THAP9-AS1	0.443572	0	0.836226	0	7.10777	1.18e-12	#ERROR!
KLHL7	THAP9-AS1	0.365176	0	0.805585	0	7.10445	1.21e-12	#ERROR!
GALC	THAP9-AS1	0.238121	1.11e-15	0.750421	0	7.10112	1.24e-12	#ERROR!
MAPKAPK5	THAP9-AS1	0.566019	0	0.879282	0	7.0993	1.25e-12	#ERROR!
SYNCRIP	THAP9-AS1	0.436816	0	0.833411	0	7.09895	1.26e-12	#ERROR!
TRMT11	THAP9-AS1	0.512435	0	0.860886	0	7.0972	1.27e-12	#ERROR!
SAV1	THAP9-AS1	0.384815	0	0.813179	0	7.09634	1.28e-12	#ERROR!
NUP155	THAP9-AS1	0.439248	0	0.834231	0	7.09588	1.29e-12	#ERROR!
ARHGEF12	THAP9-AS1	0.273148	0	0.766111	0	7.09575	1.29e-12	#ERROR!
AFDN	THAP9-AS1	0.381568	0	0.811848	0	7.09527	1.29e-12	#ERROR!
INTS8	THAP9-AS1	0.421316	0	0.827357	0	7.09406	1.3e-12	#ERROR!
FAM221A	THAP9-AS1	0.354386	0	0.800769	0	7.09302	1.31e-12	#ERROR!
LRAT	THAP9-AS1	0.16575	3.12e-08	0.715114	0	7.09282	1.31e-12	#ERROR!
SNRNP48	THAP9-AS1	0.492601	0	0.853699	0	7.09152	1.33e-12	#ERROR!
TFCP2	THAP9-AS1	0.426906	0	0.829391	0	7.09082	1.33e-12	#ERROR!
PTPRK	THAP9-AS1	0.244815	2.22e-16	0.752982	0	7.08927	1.35e-12	#ERROR!
EXPH5	THAP9-AS1	0.264056	0	0.7617	0	7.08804	1.36e-12	#ERROR!
NEK11	THAP9-AS1	0.240584	4.44e-16	0.750956	0	7.08766	1.36e-12	#ERROR!
ARHGAP5	THAP9-AS1	0.31992	0	0.786143	0	7.08714	1.37e-12	#ERROR!
B3GALNT1	THAP9-AS1	0.313713	0	0.783381	0	7.08431	1.4e-12	#ERROR!
TRIM22	THAP9-AS1	0.237392	1.33e-15	0.749144	0	7.08031	1.44e-12	#ERROR!
GLT8D2	THAP9-AS1	0.073084	0.01524	0.665249	8.88e-16	7.07996	1.44e-12	#ERROR!
TMEM67	THAP9-AS1	0.420203	0	0.826275	0	7.07399	1.51e-12	#ERROR!
TMEM68	THAP9-AS1	0.405155	0	0.82032	0	7.07061	1.54e-12	#ERROR!
GOPC	THAP9-AS1	0.441246	0	0.834148	0	7.06915	1.56e-12	#ERROR!
THAP10	THAP9-AS1	0.318663	0	0.784849	0	7.06792	1.57e-12	#ERROR!
C18orf32	THAP9-AS1	0.296078	0	0.775048	0	7.06711	1.58e-12	#ERROR!
RELCH	THAP9-AS1	0.470065	0	0.844817	0	7.06691	1.58e-12	#ERROR!
PRORP	THAP9-AS1	0.364665	0	0.803948	0	7.06505	1.61e-12	#ERROR!
IFT80	THAP9-AS1	0.528014	0	0.865411	0	7.06209	1.64e-12	#ERROR!
AUTS2	THAP9-AS1	0.205649	5.47e-12	0.73322	0	7.06128	1.65e-12	#ERROR!
NUDT11	THAP9-AS1	0.134475	7.49e-06	0.697237	0	7.05717	1.7e-12	#ERROR!
GORAB	THAP9-AS1	0.493938	0	0.853202	0	7.0566	1.71e-12	#ERROR!
SEMA3D	THAP9-AS1	0.031703	0.293037	0.639949	2.33e-14	7.05487	1.73e-12	0/+
APOBEC3F	THAP9-AS1	0.185067	6.01e-10	0.722783	0	7.0534	1.75e-12	#ERROR!
MTM1	THAP9-AS1	0.344049	0	0.794999	0	7.05313	1.75e-12	#ERROR!
THOC1	THAP9-AS1	0.524262	0	0.863774	0	7.04953	1.8e-12	#ERROR!
CNKSR3	THAP9-AS1	0.170327	1.27e-08	0.715235	0	7.04946	1.8e-12	#ERROR!
C5orf15	THAP9-AS1	0.363319	0	0.802817	0	7.04913	1.8e-12	#ERROR!
MALT1	THAP9-AS1	0.37275	0	0.806556	0	7.0462	1.84e-12	#ERROR!
NAP1L3	THAP9-AS1	0.134214	7.8e-06	0.696511	0	7.04602	1.84e-12	#ERROR!
PCDH7	THAP9-AS1	0.038146	0.205752	0.642944	1.62e-14	7.04165	1.9e-12	0/+
CAPRIN1	THAP9-AS1	0.375125	0	0.807325	0	7.04081	1.91e-12	#ERROR!
CNTNAP3	THAP9-AS1	0.173939	6.18e-09	0.716602	0	7.04055	1.91e-12	#ERROR!
TSEN2	THAP9-AS1	0.494181	0	0.852765	0	7.03788	1.95e-12	#ERROR!
C1orf112	THAP9-AS1	0.414455	0	0.822847	0	7.03756	1.96e-12	#ERROR!
LMLN	THAP9-AS1	0.333757	0	0.790067	0	7.03725	1.96e-12	#ERROR!
KLHL42	THAP9-AS1	0.387451	0	0.812083	0	7.03493	1.99e-12	#ERROR!
LSM14A	THAP9-AS1	0.476742	0	0.846327	0	7.03476	2e-12	#ERROR!
MTUS1	THAP9-AS1	0.182209	1.11e-09	0.720415	0	7.03415	2e-12	#ERROR!
CYLD	THAP9-AS1	0.331643	0	0.788956	0	7.03169	2.04e-12	#ERROR!
PINK1-AS	THAP9-AS1	0.354203	0	0.798165	0	7.02496	2.14e-12	#ERROR!
TFAM	THAP9-AS1	0.443668	0	0.833634	0	7.02351	2.16e-12	#ERROR!
PIK3C3	THAP9-AS1	0.417518	0	0.823558	0	7.02301	2.17e-12	#ERROR!
KCTD3	THAP9-AS1	0.301211	0	0.775466	0	7.02253	2.18e-12	#ERROR!
RABGAP1L	THAP9-AS1	0.363229	0	0.801725	0	7.02038	2.21e-12	#ERROR!
LINC02518	THAP9-AS1	0.077075	0.010482	0.664008	1.11e-15	7.01939	2.23e-12	#ERROR!
ADAR	THAP9-AS1	0.363516	0	0.801784	0	7.01877	2.24e-12	#ERROR!
TCTN3	THAP9-AS1	0.309644	0	0.778854	0	7.0153	2.29e-12	#ERROR!
PAN3	THAP9-AS1	0.504986	0	0.855923	0	7.01161	2.36e-12	#ERROR!
ABI1	THAP9-AS1	0.472836	0	0.844187	0	7.01097	2.37e-12	#ERROR!
AK9	THAP9-AS1	0.325666	0	0.785577	0	7.01044	2.38e-12	#ERROR!
ARMCX5	THAP9-AS1	0.3914	0	0.812759	0	7.00901	2.4e-12	#ERROR!
SNX4	THAP9-AS1	0.428988	0	0.827527	0	7.00835	2.41e-12	#ERROR!
ASNS	THAP9-AS1	0.324869	0	0.785142	0	7.00808	2.42e-12	#ERROR!
CEACAM1	THAP9-AS1	0.118141	8.45e-05	0.685916	0	7.0076	2.42e-12	#ERROR!
LDLRAD3	THAP9-AS1	0.189379	2.34e-10	0.722663	0	7.00758	2.42e-12	#ERROR!
TOX	THAP9-AS1	0.162341	5.99e-08	0.70869	0	7.00032	2.55e-12	#ERROR!
SLC30A5	THAP9-AS1	0.377682	0	0.806903	0	7.00012	2.56e-12	#ERROR!
BMI1	THAP9-AS1	0.280359	0	0.765267	0	7.00008	2.56e-12	#ERROR!
RND3	THAP9-AS1	0.198307	3.1e-11	0.7267	0	7.00004	2.56e-12	#ERROR!
ARFIP1	THAP9-AS1	0.438311	0	0.830792	0	6.99831	2.59e-12	#ERROR!
EFHC1	THAP9-AS1	0.396017	0	0.814208	0	6.99754	2.6e-12	#ERROR!
LATS1	THAP9-AS1	0.385196	0	0.809827	0	6.99666	2.62e-12	#ERROR!
MSL3	THAP9-AS1	0.38346	0	0.809073	0	6.99519	2.65e-12	#ERROR!
CCNT1	THAP9-AS1	0.473013	0	0.84378	0	6.995	2.65e-12	#ERROR!
IL7	THAP9-AS1	0.252587	0	0.752286	0	6.99324	2.69e-12	#ERROR!
ENTPD4	THAP9-AS1	0.316705	0	0.780964	0	6.99158	2.72e-12	#ERROR!
RAD1	THAP9-AS1	0.438042	0	0.830447	0	6.99071	2.73e-12	#ERROR!
RARS1	THAP9-AS1	0.397135	0	0.814415	0	6.99063	2.74e-12	#ERROR!
NUDT12	THAP9-AS1	0.255395	0	0.753459	0	6.99038	2.74e-12	#ERROR!
RAD17	THAP9-AS1	0.447314	0	0.83396	0	6.9897	2.75e-12	#ERROR!
GNG12-AS1	THAP9-AS1	0.128203	1.97e-05	0.690206	0	6.9875	2.8e-12	#ERROR!
KIAA0825	THAP9-AS1	0.189	2.55e-10	0.721437	0	6.98651	2.82e-12	#ERROR!
RAD21	THAP9-AS1	0.365686	0	0.801331	0	6.98215	2.91e-12	#ERROR!
CTC1	THAP9-AS1	0.307355	0	0.776497	0	6.98195	2.91e-12	#ERROR!
PPIL4	THAP9-AS1	0.418803	0	0.822566	0	6.97803	2.99e-12	#ERROR!
FAM111A-DT	THAP9-AS1	0.359847	0	0.798747	0	6.97774	3e-12	#ERROR!
TMEM267	THAP9-AS1	0.436099	0	0.829275	0	6.97749	3.01e-12	#ERROR!
SUZ12	THAP9-AS1	0.442613	0	0.831759	0	6.97685	3.02e-12	#ERROR!
DCAF10	THAP9-AS1	0.331945	0	0.786859	0	6.97469	3.07e-12	#ERROR!
SLC26A8	THAP9-AS1	0.196798	4.4e-11	0.724544	0	6.97107	3.15e-12	#ERROR!
JPX	THAP9-AS1	0.451465	0	0.834905	0	6.96941	3.18e-12	#ERROR!
PRDM4	THAP9-AS1	0.463616	0	0.83949	0	6.96903	3.19e-12	#ERROR!
IRAK1BP1	THAP9-AS1	0.390529	0	0.810982	0	6.96836	3.21e-12	#ERROR!
ATL1	THAP9-AS1	0.154063	2.76e-07	0.70275	0	6.96784	3.22e-12	#ERROR!
NPAT	THAP9-AS1	0.36464	0	0.800289	0	6.96568	3.27e-12	#ERROR!
SLC25A12	THAP9-AS1	0.390324	0	0.810753	0	6.96423	3.3e-12	#ERROR!
GUSBP5	THAP9-AS1	0.198336	3.08e-11	0.724854	0	6.96187	3.36e-12	#ERROR!
PLPP6	THAP9-AS1	0.289228	0	0.76754	0	6.95984	3.41e-12	#ERROR!
TTC17	THAP9-AS1	0.471199	0	0.841998	0	6.9579	3.45e-12	#ERROR!
CPSF6	THAP9-AS1	0.579163	0	0.880351	0	6.95533	3.52e-12	#ERROR!
MR1	THAP9-AS1	0.212191	1.1e-12	0.731295	0	6.95451	3.54e-12	#ERROR!
MTMR4	THAP9-AS1	0.409662	0	0.818125	0	6.95331	3.57e-12	#ERROR!
CNOT6	THAP9-AS1	0.437706	0	0.829057	0	6.95141	3.62e-12	#ERROR!
KLHL2	THAP9-AS1	0.311961	0	0.777241	0	6.9507	3.63e-12	#ERROR!
SMG8	THAP9-AS1	0.358516	0	0.797176	0	6.95058	3.64e-12	#ERROR!
RFC3	THAP9-AS1	0.412374	0	0.819037	0	6.94845	3.69e-12	#ERROR!
CMTR2	THAP9-AS1	0.42251	0	0.822955	0	6.94598	3.76e-12	#ERROR!
TAF1D	THAP9-AS1	0.421195	0	0.822415	0	6.94529	3.78e-12	#ERROR!
EFCAB1	THAP9-AS1	0.093815	0.001823	0.669069	4.44e-16	6.94406	3.81e-12	#ERROR!
FBXO22	THAP9-AS1	0.456074	0	0.835867	0	6.94396	3.81e-12	#ERROR!
FBXO25	THAP9-AS1	0.311831	0	0.776882	0	6.94329	3.83e-12	#ERROR!
TRPC6	THAP9-AS1	0.163077	5.21e-08	0.706063	0	6.94191	3.87e-12	#ERROR!
TUSC3	THAP9-AS1	0.167147	2.38e-08	0.708127	0	6.94137	3.88e-12	#ERROR!
RALGPS2	THAP9-AS1	0.248077	0	0.747846	0	6.94137	3.88e-12	#ERROR!
TMED8	THAP9-AS1	0.305215	0	0.773848	0	6.94042	3.91e-12	#ERROR!
PCMTD2	THAP9-AS1	0.462215	0	0.838041	0	6.93889	3.95e-12	#ERROR!
INTS4	THAP9-AS1	0.378325	0	0.804775	0	6.93386	4.1e-12	#ERROR!
PSMD5	THAP9-AS1	0.352071	0	0.793823	0	6.93351	4.11e-12	#ERROR!
DNAJC16	THAP9-AS1	0.390337	0	0.80962	0	6.93204	4.15e-12	#ERROR!
CUL4B	THAP9-AS1	0.3973	0	0.812404	0	6.93102	4.18e-12	#ERROR!
AMN1	THAP9-AS1	0.322125	0	0.780828	0	6.92958	4.22e-12	#ERROR!
PPP2R2A	THAP9-AS1	0.348088	0	0.791975	0	6.92928	4.23e-12	#ERROR!
FASTKD3	THAP9-AS1	0.505537	0	0.853835	0	6.92908	4.24e-12	#ERROR!
SFXN1	THAP9-AS1	0.366973	0	0.799828	0	6.92706	4.3e-12	#ERROR!
DIMT1	THAP9-AS1	0.475426	0	0.842648	0	6.92672	4.31e-12	#ERROR!
FRMD4B	THAP9-AS1	0.263974	0	0.754394	0	6.92206	4.45e-12	#ERROR!
IMPACT	THAP9-AS1	0.352315	0	0.793443	0	6.92084	4.49e-12	#ERROR!
ELAC1	THAP9-AS1	0.250094	0	0.74779	0	6.91925	4.54e-12	#ERROR!
KIAA0753	THAP9-AS1	0.45037	0	0.832908	0	6.9191	4.55e-12	#ERROR!
CSNK1G3	THAP9-AS1	0.373354	0	0.802169	0	6.91869	4.56e-12	#ERROR!
TEX9	THAP9-AS1	0.232251	5.77e-15	0.739236	0	6.91746	4.6e-12	#ERROR!
SECISBP2	THAP9-AS1	0.482634	0	0.845038	0	6.9165	4.63e-12	#ERROR!
SHQ1	THAP9-AS1	0.334578	0	0.785522	0	6.91191	4.78e-12	#ERROR!
FERMT1	THAP9-AS1	0.11977	6.73e-05	0.681447	0	6.91006	4.84e-12	#ERROR!
TBCCD1	THAP9-AS1	0.42319	0	0.822012	0	6.90963	4.86e-12	#ERROR!
NEK4	THAP9-AS1	0.358034	0	0.79534	0	6.90721	4.94e-12	#ERROR!
RBAK	THAP9-AS1	0.432479	0	0.825573	0	6.90682	4.96e-12	#ERROR!
RNF32	THAP9-AS1	0.368114	0	0.799548	0	6.90672	4.96e-12	#ERROR!
OTUD7A	THAP9-AS1	0.153055	3.3e-07	0.698954	0	6.90542	5.01e-12	#ERROR!
RNF2	THAP9-AS1	0.373001	0	0.801372	0	6.90099	5.16e-12	#ERROR!
BCLAF1	THAP9-AS1	0.465587	0	0.838147	0	6.90061	5.18e-12	#ERROR!
ADNP2	THAP9-AS1	0.412405	0	0.817414	0	6.9004	5.19e-12	#ERROR!
STT3A	THAP9-AS1	0.291675	0	0.766078	0	6.89944	5.22e-12	#ERROR!
KYAT3	THAP9-AS1	0.391335	0	0.80885	0	6.89896	5.24e-12	#ERROR!
DHFR2	THAP9-AS1	0.302707	0	0.770974	0	6.89805	5.27e-12	#ERROR!
RLF	THAP9-AS1	0.43468	0	0.826129	0	6.89746	5.29e-12	#ERROR!
ANKRD50	THAP9-AS1	0.31525	0	0.776514	0	6.89744	5.29e-12	#ERROR!
SIPA1L1	THAP9-AS1	0.287469	0	0.76405	0	6.89651	5.33e-12	#ERROR!
HNRNPA3	THAP9-AS1	0.501171	0	0.851289	0	6.89532	5.37e-12	#ERROR!
PRKX	THAP9-AS1	0.292276	0	0.766166	0	6.89512	5.38e-12	#ERROR!
MED17	THAP9-AS1	0.442062	0	0.828889	0	6.89377	5.43e-12	#ERROR!
PPP1R3E	THAP9-AS1	0.349562	0	0.791128	0	6.89094	5.54e-12	#ERROR!
MBLAC2	THAP9-AS1	0.37703	0	0.802662	0	6.8906	5.56e-12	#ERROR!
TDG	THAP9-AS1	0.451955	0	0.832614	0	6.89043	5.56e-12	#ERROR!
LSM11	THAP9-AS1	0.418398	0	0.819311	0	6.88584	5.74e-12	#ERROR!
NUP42	THAP9-AS1	0.529712	0	0.86136	0	6.88462	5.79e-12	#ERROR!
ATXN7	THAP9-AS1	0.427654	0	0.822922	0	6.884	5.82e-12	#ERROR!
SLC35E3	THAP9-AS1	0.408673	0	0.815103	0	6.87672	6.12e-12	#ERROR!
ITPRID2	THAP9-AS1	0.205013	6.37e-12	0.72398	0	6.8764	6.14e-12	#ERROR!
G2E3	THAP9-AS1	0.405092	0	0.813638	0	6.87617	6.15e-12	#ERROR!
TENT4B	THAP9-AS1	0.281293	0	0.760332	0	6.87561	6.17e-12	#ERROR!
MAT2B	THAP9-AS1	0.392116	0	0.808321	0	6.87516	6.19e-12	#ERROR!
DHX32	THAP9-AS1	0.331811	0	0.782853	0	6.87484	6.21e-12	#ERROR!
GDPD1	THAP9-AS1	0.294847	0	0.766362	0	6.8724	6.31e-12	#ERROR!
MED23	THAP9-AS1	0.394846	0	0.809324	0	6.87192	6.33e-12	#ERROR!
LMBR1	THAP9-AS1	0.393713	0	0.808699	0	6.8674	6.54e-12	#ERROR!
GIN1	THAP9-AS1	0.372858	0	0.800069	0	6.86735	6.54e-12	#ERROR!
LINC01278	THAP9-AS1	0.324512	0	0.77935	0	6.86701	6.56e-12	#ERROR!
NAA16	THAP9-AS1	0.473419	0	0.840076	0	6.86635	6.59e-12	#ERROR!
TRMT10B	THAP9-AS1	0.537846	0	0.863778	0	6.86592	6.61e-12	#ERROR!
SLC16A4	THAP9-AS1	0.181587	1.27e-09	0.711629	0	6.86528	6.64e-12	#ERROR!
SPOPL	THAP9-AS1	0.309554	0	0.772635	0	6.86458	6.67e-12	#ERROR!
CASC3	THAP9-AS1	0.350215	0	0.790019	0	6.85499	7.13e-12	#ERROR!
GPRASP1	THAP9-AS1	0.18935	2.36e-10	0.714948	0	6.85281	7.24e-12	#ERROR!
CNOT7	THAP9-AS1	0.375779	0	0.800694	0	6.85126	7.32e-12	#ERROR!
C12orf29	THAP9-AS1	0.457919	0	0.833662	0	6.85065	7.35e-12	#ERROR!
TRMT5	THAP9-AS1	0.47036	0	0.8384	0	6.84954	7.41e-12	#ERROR!
CD44	THAP9-AS1	0.199307	2.46e-11	0.719805	0	6.84951	7.41e-12	#ERROR!
GATM	THAP9-AS1	0.151825	4.11e-07	0.695291	0	6.84843	7.47e-12	#ERROR!
N4BP2L1	THAP9-AS1	0.367439	0	0.797012	0	6.8464	7.57e-12	#ERROR!
MFSD6	THAP9-AS1	0.254539	0	0.746528	0	6.8454	7.63e-12	#ERROR!
GALNT1	THAP9-AS1	0.258286	0	0.748289	0	6.84518	7.64e-12	#ERROR!
ID4	THAP9-AS1	0.160516	8.45e-08	0.699614	0	6.84368	7.72e-12	#ERROR!
KDM3A	THAP9-AS1	0.458882	0	0.833772	0	6.84234	7.79e-12	#ERROR!
TMEM260	THAP9-AS1	0.398662	0	0.809811	0	6.84168	7.83e-12	#ERROR!
LOC100505501	THAP9-AS1	0.149259	6.45e-07	0.693499	0	6.84031	7.9e-12	#ERROR!
TXNDC11	THAP9-AS1	0.278205	0	0.757335	0	6.83953	7.95e-12	#ERROR!
RSPH3	THAP9-AS1	0.327473	0	0.779501	0	6.83856	8e-12	#ERROR!
PGAM1P5	THAP9-AS1	0.106695	0.000388	0.670226	4.44e-16	6.83807	8.03e-12	#ERROR!
HSPB11	THAP9-AS1	0.325783	0	0.778677	0	6.83658	8.11e-12	#ERROR!
G3BP1	THAP9-AS1	0.390117	0	0.806043	0	6.83455	8.23e-12	#ERROR!
RBM22	THAP9-AS1	0.456339	0	0.832537	0	6.83437	8.24e-12	#ERROR!
RYBP	THAP9-AS1	0.378307	0	0.801055	0	6.8324	8.35e-12	#ERROR!
RASSF5	THAP9-AS1	0.149868	5.8e-07	0.693392	0	6.83226	8.36e-12	#ERROR!
CADM1	THAP9-AS1	0.139191	3.52e-06	0.687656	0	6.8317	8.39e-12	#ERROR!
TP53BP2	THAP9-AS1	0.348074	0	0.788129	0	6.83003	8.49e-12	#ERROR!
ATG2B	THAP9-AS1	0.309338	0	0.77109	0	6.82979	8.5e-12	#ERROR!
POGZ	THAP9-AS1	0.500771	0	0.849219	0	6.82797	8.61e-12	#ERROR!
CFAP43	THAP9-AS1	0.183439	8.53e-10	0.710609	0	6.82664	8.69e-12	#ERROR!
TTC19	THAP9-AS1	0.379082	0	0.801131	0	6.82567	8.75e-12	#ERROR!
KRBOX1	THAP9-AS1	0.084696	0.004901	0.657048	2.66e-15	6.82496	8.8e-12	#ERROR!
SAAL1	THAP9-AS1	0.349357	0	0.788475	0	6.82471	8.81e-12	#ERROR!
ARHGAP26	THAP9-AS1	0.181229	1.36e-09	0.70905	0	6.81832	9.21e-12	#ERROR!
TARBP1	THAP9-AS1	0.476391	0	0.839729	0	6.81765	9.25e-12	#ERROR!
SOX2-OT	THAP9-AS1	0.154027	2.78e-07	0.694732	0	6.81604	9.36e-12	#ERROR!
SMAD4	THAP9-AS1	0.465434	0	0.835435	0	6.81464	9.45e-12	#ERROR!
MARCHF5	THAP9-AS1	0.434678	0	0.823221	0	6.80921	9.81e-12	#ERROR!
LRATD2	THAP9-AS1	0.293171	0	0.762897	0	6.80917	9.82e-12	#ERROR!
CHML	THAP9-AS1	0.354776	0	0.790193	0	6.8089	9.83e-12	#ERROR!
FEM1B	THAP9-AS1	0.402337	0	0.810146	0	6.80863	9.85e-12	#ERROR!
FAM122A	THAP9-AS1	0.418449	0	0.81668	0	6.808	9.9e-12	#ERROR!
MIS12	THAP9-AS1	0.447097	0	0.828087	0	6.80796	9.9e-12	#ERROR!
ABCA11P	THAP9-AS1	0.484389	0	0.842388	0	6.80492	1.01e-11	#ERROR!
PPP2R3A	THAP9-AS1	0.20128	1.55e-11	0.718381	0	6.80091	1.04e-11	#ERROR!
EFNA5	THAP9-AS1	0.113883	0.000152	0.672074	4.44e-16	6.80006	1.05e-11	#ERROR!
MANSC1	THAP9-AS1	0.194466	7.49e-11	0.7148	0	6.7983	1.06e-11	#ERROR!
DBF4	THAP9-AS1	0.443534	0	0.826323	0	6.79688	1.07e-11	#ERROR!
LRRC6	THAP9-AS1	0.196251	4.98e-11	0.715585	0	6.79589	1.08e-11	#ERROR!
CCSAP	THAP9-AS1	0.371576	0	0.796728	0	6.79229	1.1e-11	#ERROR!
GCNT4	THAP9-AS1	0.13245	1.03e-05	0.681749	0	6.79039	1.12e-11	#ERROR!
RPS6KA6	THAP9-AS1	0.205987	5.04e-12	0.720226	0	6.79034	1.12e-11	#ERROR!
CD226	THAP9-AS1	0.208637	2.65e-12	0.721555	0	6.79032	1.12e-11	#ERROR!
ABHD2	THAP9-AS1	0.165701	3.15e-08	0.699408	0	6.78801	1.14e-11	#ERROR!
TMEM181	THAP9-AS1	0.301121	0	0.765472	0	6.78461	1.16e-11	#ERROR!
LRRN1	THAP9-AS1	0.125752	2.83e-05	0.677722	2.22e-16	6.78383	1.17e-11	#ERROR!
MSL2	THAP9-AS1	0.490492	0	0.844004	0	6.78148	1.19e-11	#ERROR!
SNIP1	THAP9-AS1	0.480196	0	0.840051	0	6.78034	1.2e-11	#ERROR!
SOCS6	THAP9-AS1	0.314009	0	0.771111	0	6.78005	1.2e-11	#ERROR!
SPATA18	THAP9-AS1	0.145788	1.17e-06	0.688328	0	6.77868	1.21e-11	#ERROR!
C16orf70	THAP9-AS1	0.339207	0	0.782206	0	6.77766	1.22e-11	#ERROR!
TBK1	THAP9-AS1	0.44383	0	0.825801	0	6.77733	1.22e-11	#ERROR!
DNAJC3	THAP9-AS1	0.28149	0	0.756104	0	6.77693	1.23e-11	#ERROR!
NLGN4X	THAP9-AS1	0.059718	0.047487	0.639588	2.44e-14	6.77626	1.23e-11	#ERROR!
LINC01265	THAP9-AS1	0.089112	0.003069	0.656589	2.89e-15	6.7739	1.25e-11	#ERROR!
C12orf60	THAP9-AS1	0.250905	0	0.741426	0	6.77213	1.27e-11	#ERROR!
PCID2	THAP9-AS1	0.486923	0	0.84237	0	6.7721	1.27e-11	#ERROR!
ATG14	THAP9-AS1	0.432515	0	0.821106	0	6.7717	1.27e-11	#ERROR!
INIP	THAP9-AS1	0.46631	0	0.83435	0	6.76901	1.3e-11	#ERROR!
NUMB	THAP9-AS1	0.353363	0	0.787986	0	6.76778	1.31e-11	#ERROR!
HIVEP3	THAP9-AS1	0.286966	0	0.758213	0	6.76707	1.31e-11	#ERROR!
TMEM144	THAP9-AS1	0.277704	0	0.753876	0	6.7665	1.32e-11	#ERROR!
TRIM2	THAP9-AS1	0.275913	0	0.752853	0	6.76236	1.36e-11	#ERROR!
MPP5	THAP9-AS1	0.310123	0	0.768533	0	6.76038	1.38e-11	#ERROR!
MBD4	THAP9-AS1	0.49729	0	0.845935	0	6.75973	1.38e-11	#ERROR!
AP1AR	THAP9-AS1	0.493128	0	0.844327	0	6.75862	1.39e-11	#ERROR!
SLC9A7P1	THAP9-AS1	0.139525	3.33e-06	0.683818	0	6.75801	1.4e-11	#ERROR!
DOCK5	THAP9-AS1	0.272143	0	0.750864	0	6.7575	1.4e-11	#ERROR!
ACTL6A	THAP9-AS1	0.406194	0	0.809918	0	6.75741	1.4e-11	#ERROR!
CXADR	THAP9-AS1	0.153226	3.2e-07	0.691089	0	6.75594	1.42e-11	#ERROR!
LINC02728	THAP9-AS1	0.266204	0	0.747856	0	6.75305	1.45e-11	#ERROR!
HDGFL3	THAP9-AS1	0.30447	0	0.765641	0	6.75277	1.45e-11	#ERROR!
ATP2B1-AS1	THAP9-AS1	0.228657	1.55e-14	0.729622	0	6.75159	1.46e-11	#ERROR!
SH3RF2	THAP9-AS1	0.094942	0.001603	0.658615	2.22e-15	6.75147	1.46e-11	#ERROR!
CCP110	THAP9-AS1	0.41451	0	0.813116	0	6.75124	1.47e-11	#ERROR!
PAX6	THAP9-AS1	0.283679	0	0.755948	0	6.75027	1.48e-11	#ERROR!
CCDC186	THAP9-AS1	0.319512	0	0.772337	0	6.75006	1.48e-11	#ERROR!
SPDL1	THAP9-AS1	0.459295	0	0.830997	0	6.74949	1.48e-11	#ERROR!
PIGL	THAP9-AS1	0.420131	0	0.815313	0	6.74846	1.49e-11	#ERROR!
RBM27	THAP9-AS1	0.481865	0	0.839719	0	6.74831	1.5e-11	#ERROR!
DENND11	THAP9-AS1	0.395683	0	0.805204	0	6.74742	1.5e-11	#ERROR!
SRP72	THAP9-AS1	0.456516	0	0.829838	0	6.74739	1.51e-11	#ERROR!
ARL10	THAP9-AS1	0.232005	6.22e-15	0.731032	0	6.7466	1.51e-11	#ERROR!
MIOS	THAP9-AS1	0.363102	0	0.791343	0	6.74588	1.52e-11	#ERROR!
STON2	THAP9-AS1	0.102653	0.000643	0.662676	1.33e-15	6.74583	1.52e-11	#ERROR!
PWWP2A	THAP9-AS1	0.487377	0	0.841719	0	6.74458	1.53e-11	#ERROR!
DIP2B	THAP9-AS1	0.349138	0	0.78523	0	6.74439	1.54e-11	#ERROR!
TRIM37	THAP9-AS1	0.354535	0	0.787564	0	6.74397	1.54e-11	#ERROR!
ATP2B1	THAP9-AS1	0.297699	0	0.762143	0	6.7435	1.55e-11	#ERROR!
TRIM13	THAP9-AS1	0.368375	0	0.79348	0	6.74255	1.56e-11	#ERROR!
CEP78	THAP9-AS1	0.50322	0	0.847669	0	6.74241	1.56e-11	#ERROR!
PDE4DIPP6	THAP9-AS1	0.245637	0	0.737471	0	6.74189	1.56e-11	#ERROR!
SYNRG	THAP9-AS1	0.361494	0	0.790439	0	6.74042	1.58e-11	#ERROR!
SLC23A1	THAP9-AS1	0.144475	1.47e-06	0.685524	0	6.74014	1.58e-11	#ERROR!
THNSL1	THAP9-AS1	0.338916	0	0.780545	0	6.73944	1.59e-11	#ERROR!
AFF4	THAP9-AS1	0.305521	0	0.76551	0	6.73843	1.6e-11	#ERROR!
TRAF3IP2	THAP9-AS1	0.295744	0	0.76096	0	6.73697	1.62e-11	#ERROR!
COQ7	THAP9-AS1	0.309748	0	0.767364	0	6.73674	1.62e-11	#ERROR!
SMARCE1	THAP9-AS1	0.399678	0	0.806458	0	6.73606	1.63e-11	#ERROR!
PTPN22	THAP9-AS1	0.20511	6.23e-12	0.71708	0	6.73606	1.63e-11	#ERROR!
TAX1BP1	THAP9-AS1	0.377022	0	0.796901	0	6.7354	1.63e-11	#ERROR!
KIAA0586	THAP9-AS1	0.394898	0	0.804424	0	6.73494	1.64e-11	#ERROR!
MTERF2	THAP9-AS1	0.373872	0	0.795515	0	6.73422	1.65e-11	#ERROR!
HMGN4	THAP9-AS1	0.405282	0	0.80871	0	6.734	1.65e-11	#ERROR!
ABITRAM	THAP9-AS1	0.449432	0	0.826596	0	6.7337	1.65e-11	#ERROR!
SLC30A9	THAP9-AS1	0.447988	0	0.826022	0	6.73368	1.65e-11	#ERROR!
ALG2	THAP9-AS1	0.376724	0	0.796626	0	6.73144	1.68e-11	#ERROR!
PPHLN1	THAP9-AS1	0.539711	0	0.860882	0	6.73067	1.69e-11	#ERROR!
CCNT2	THAP9-AS1	0.515685	0	0.85198	0	6.72965	1.7e-11	#ERROR!
CTSO	THAP9-AS1	0.302236	0	0.763597	0	6.72887	1.71e-11	#ERROR!
MFSD14A	THAP9-AS1	0.414741	0	0.812378	0	6.72742	1.73e-11	#ERROR!
DHX57	THAP9-AS1	0.455679	0	0.828834	0	6.72643	1.74e-11	#ERROR!
ATRN	THAP9-AS1	0.31159	0	0.767764	0	6.72639	1.74e-11	#ERROR!
MIA2	THAP9-AS1	0.307009	0	0.765672	0	6.72629	1.74e-11	#ERROR!
DBR1	THAP9-AS1	0.454951	0	0.828536	0	6.7261	1.74e-11	#ERROR!
HNRNPLL	THAP9-AS1	0.465471	0	0.832531	0	6.72154	1.8e-11	#ERROR!
EED	THAP9-AS1	0.412203	0	0.811106	0	6.72095	1.81e-11	#ERROR!
IKZF5	THAP9-AS1	0.464198	0	0.832008	0	6.72081	1.81e-11	#ERROR!
FBXO30-DT	THAP9-AS1	0.272925	0	0.749517	0	6.71938	1.83e-11	#ERROR!
THEMIS	THAP9-AS1	0.156196	1.88e-07	0.690699	0	6.71913	1.83e-11	#ERROR!
OSBPL9	THAP9-AS1	0.410036	0	0.810122	0	6.7184	1.84e-11	#ERROR!
DHX29	THAP9-AS1	0.307816	0	0.765698	0	6.71825	1.84e-11	#ERROR!
SUV39H2	THAP9-AS1	0.392239	0	0.802699	0	6.71822	1.84e-11	#ERROR!
PRKCH	THAP9-AS1	0.225208	3.86e-14	0.726267	0	6.71758	1.85e-11	#ERROR!
HSDL1	THAP9-AS1	0.401534	0	0.806503	0	6.71583	1.87e-11	#ERROR!
PLEKHA5	THAP9-AS1	0.356575	0	0.787313	0	6.71487	1.88e-11	#ERROR!
PPIP5K1	THAP9-AS1	0.338227	0	0.779078	0	6.71063	1.94e-11	#ERROR!
CSTF1	THAP9-AS1	0.425998	0	0.816394	0	6.71043	1.94e-11	#ERROR!
RFESD	THAP9-AS1	0.266545	0	0.745994	0	6.70859	1.97e-11	#ERROR!
IGF1R	THAP9-AS1	0.221259	1.09e-13	0.723855	0	6.70855	1.97e-11	#ERROR!
RPL31P46	THAP9-AS1	0.246238	0	0.736165	0	6.70793	1.97e-11	#ERROR!
LUC7L2	THAP9-AS1	0.637172	0	0.894507	0	6.70779	1.98e-11	#ERROR!
SF3B1	THAP9-AS1	0.49825	0	0.844697	0	6.7052	2.01e-11	#ERROR!
CEP83	THAP9-AS1	0.553721	0	0.865292	0	6.70453	2.02e-11	#ERROR!
ERO1B	THAP9-AS1	0.234205	3.55e-15	0.73006	0	6.70376	2.03e-11	#ERROR!
NKAP	THAP9-AS1	0.429484	0	0.817574	0	6.70348	2.04e-11	#ERROR!
ASF1A	THAP9-AS1	0.392316	0	0.802174	0	6.70302	2.04e-11	#ERROR!
DNAJC3-DT	THAP9-AS1	0.294969	0	0.759079	0	6.70197	2.06e-11	#ERROR!
ST8SIA1	THAP9-AS1	0.156246	1.86e-07	0.689633	0	6.69886	2.1e-11	#ERROR!
TRIM24	THAP9-AS1	0.438763	0	0.821121	0	6.69723	2.12e-11	#ERROR!
NUP160	THAP9-AS1	0.434706	0	0.819454	0	6.69643	2.14e-11	#ERROR!
GTF2H3	THAP9-AS1	0.476924	0	0.836185	0	6.69536	2.15e-11	#ERROR!
NCOA1	THAP9-AS1	0.315308	0	0.768091	0	6.69408	2.17e-11	#ERROR!
CBFB	THAP9-AS1	0.396508	0	0.80349	0	6.69076	2.22e-11	#ERROR!
DELE1	THAP9-AS1	0.336924	0	0.777634	0	6.68934	2.24e-11	#ERROR!
ORC2	THAP9-AS1	0.526141	0	0.854745	0	6.68908	2.25e-11	#ERROR!
TLK2	THAP9-AS1	0.416385	0	0.811671	0	6.68798	2.26e-11	#ERROR!
ELF1	THAP9-AS1	0.319242	0	0.76961	0	6.68769	2.27e-11	#ERROR!
NR3C2	THAP9-AS1	0.210627	1.62e-12	0.717391	0	6.68626	2.29e-11	#ERROR!
PSME3IP1	THAP9-AS1	0.382808	0	0.797509	0	6.68591	2.29e-11	#ERROR!
LINC01918	THAP9-AS1	0.067422	0.02521	0.638608	2.75e-14	6.68503	2.31e-11	#ERROR!
BCL11B	THAP9-AS1	0.114774	0.000134	0.665988	8.88e-16	6.68427	2.32e-11	#ERROR!
METTL15	THAP9-AS1	0.422312	0	0.813974	0	6.68403	2.32e-11	#ERROR!
SPRTN	THAP9-AS1	0.43845	0	0.820517	0	6.68303	2.34e-11	#ERROR!
FMR1	THAP9-AS1	0.465253	0	0.831217	0	6.6828	2.34e-11	#ERROR!
TUB	THAP9-AS1	0.226024	3.11e-14	0.724953	0	6.68227	2.35e-11	#ERROR!
ARID2	THAP9-AS1	0.378883	0	0.795672	0	6.68169	2.36e-11	#ERROR!
PTPN14	THAP9-AS1	0.255248	0	0.73923	0	6.67984	2.39e-11	#ERROR!
ARSJ	THAP9-AS1	0.110099	0.00025	0.663053	1.33e-15	6.67921	2.4e-11	#ERROR!
GULP1	THAP9-AS1	0.144636	1.43e-06	0.682245	0	6.67871	2.41e-11	#ERROR!
SP2-AS1	THAP9-AS1	0.334965	0	0.77629	0	6.67786	2.42e-11	#ERROR!
ACTR6	THAP9-AS1	0.482734	0	0.837889	0	6.67733	2.43e-11	#ERROR!
MAP3K1	THAP9-AS1	0.282894	0	0.752329	0	6.67708	2.44e-11	#ERROR!
PDCD4	THAP9-AS1	0.198586	2.91e-11	0.710764	0	6.67698	2.44e-11	#ERROR!
POLD3	THAP9-AS1	0.441199	0	0.821378	0	6.67557	2.46e-11	#ERROR!
CCDC113	THAP9-AS1	0.251166	0	0.736971	0	6.67401	2.49e-11	#ERROR!
RESF1	THAP9-AS1	0.396433	0	0.80284	0	6.67384	2.49e-11	#ERROR!
ADSS2	THAP9-AS1	0.420391	0	0.812823	0	6.67367	2.49e-11	#ERROR!
ADAMTS9-AS2	THAP9-AS1	0.160031	9.25e-08	0.690288	0	6.6733	2.5e-11	#ERROR!
GLI3	THAP9-AS1	0.204157	7.82e-12	0.713439	0	6.6733	2.5e-11	#ERROR!
POLG2	THAP9-AS1	0.497372	0	0.843408	0	6.673	2.51e-11	#ERROR!
SYNJ2	THAP9-AS1	0.315339	0	0.76713	0	6.67103	2.54e-11	#ERROR!
ATXN7L3B	THAP9-AS1	0.411962	0	0.809116	0	6.66751	2.6e-11	#ERROR!
DENND6A	THAP9-AS1	0.48113	0	0.836938	0	6.66673	2.62e-11	#ERROR!
ATP6V1A	THAP9-AS1	0.332911	0	0.774904	0	6.66653	2.62e-11	#ERROR!
SEPTIN6	THAP9-AS1	0.223857	5.55e-14	0.723069	0	6.66598	2.63e-11	#ERROR!
TTC27	THAP9-AS1	0.474222	0	0.834208	0	6.66578	2.63e-11	#ERROR!
RTTN	THAP9-AS1	0.417981	0	0.811468	0	6.66341	2.68e-11	#ERROR!
L3MBTL3	THAP9-AS1	0.300485	0	0.759926	0	6.66262	2.69e-11	#ERROR!
RMI1	THAP9-AS1	0.405477	0	0.806228	0	6.66245	2.69e-11	#ERROR!
RFX3	THAP9-AS1	0.409527	0	0.807918	0	6.66237	2.69e-11	#ERROR!
MED13L	THAP9-AS1	0.274251	0	0.747515	0	6.66124	2.72e-11	#ERROR!
KRR1	THAP9-AS1	0.478176	0	0.835597	0	6.66067	2.73e-11	#ERROR!
TNFRSF11A	THAP9-AS1	0.151266	4.54e-07	0.68481	0	6.65965	2.74e-11	#ERROR!
TAB3	THAP9-AS1	0.333254	0	0.774745	0	6.6589	2.76e-11	#ERROR!
CASK	THAP9-AS1	0.326701	0	0.771751	0	6.65803	2.78e-11	#ERROR!
NLK	THAP9-AS1	0.394804	0	0.801475	0	6.65543	2.82e-11	#ERROR!
SERINC5	THAP9-AS1	0.222322	8.3e-14	0.721697	0	6.65381	2.86e-11	#ERROR!
MOB1B	THAP9-AS1	0.434688	0	0.817984	0	6.65334	2.87e-11	#ERROR!
C17orf67	THAP9-AS1	0.272242	0	0.746181	0	6.65303	2.87e-11	#ERROR!
KCNC4	THAP9-AS1	0.221062	1.15e-13	0.720851	0	6.64956	2.94e-11	#ERROR!
SMARCA5	THAP9-AS1	0.474415	0	0.833708	0	6.64741	2.98e-11	#ERROR!
SLC46A1	THAP9-AS1	0.234767	2.89e-15	0.727603	0	6.64707	2.99e-11	#ERROR!
RIOK1	THAP9-AS1	0.467052	0	0.830787	0	6.64699	2.99e-11	#ERROR!
NBEA	THAP9-AS1	0.180192	1.7e-09	0.699573	0	6.64607	3.01e-11	#ERROR!
LOC339874	THAP9-AS1	0.183665	8.13e-10	0.701317	0	6.64444	3.04e-11	#ERROR!
POLR3F	THAP9-AS1	0.509563	0	0.84722	0	6.6441	3.05e-11	#ERROR!
MAP9	THAP9-AS1	0.279501	0	0.74916	0	6.64232	3.09e-11	#ERROR!
AASDHPPT	THAP9-AS1	0.374509	0	0.792257	0	6.64145	3.11e-11	#ERROR!
CBWD2	THAP9-AS1	0.414246	0	0.8091	0	6.64032	3.13e-11	#ERROR!
COPB1	THAP9-AS1	0.372873	0	0.791453	0	6.63898	3.16e-11	#ERROR!
HMGXB4	THAP9-AS1	0.420072	0	0.811408	0	6.63708	3.2e-11	#ERROR!
LOXL1-AS1	THAP9-AS1	0.227741	1.98e-14	0.723588	0	6.63682	3.21e-11	#ERROR!
SCAF8	THAP9-AS1	0.43529	0	0.817621	0	6.63549	3.23e-11	#ERROR!
TP63	THAP9-AS1	0.083373	0.005616	0.645013	1.24e-14	6.635	3.25e-11	#ERROR!
SETBP1	THAP9-AS1	0.155049	2.31e-07	0.685393	0	6.63269	3.3e-11	#ERROR!
RRP1B	THAP9-AS1	0.438823	0	0.818877	0	6.62998	3.36e-11	#ERROR!
TIMM10B	THAP9-AS1	0.421135	0	0.811588	0	6.62965	3.36e-11	#ERROR!
ITPR1	THAP9-AS1	0.172991	7.48e-09	0.694878	0	6.62951	3.37e-11	#ERROR!
PDGFC	THAP9-AS1	0.138945	3.66e-06	0.676365	2.22e-16	6.62907	3.38e-11	#ERROR!
TMEM185B	THAP9-AS1	0.379424	0	0.79388	0	6.62829	3.4e-11	#ERROR!
SMARCA1	THAP9-AS1	0.245711	0	0.732117	0	6.62809	3.4e-11	#ERROR!
P3H2	THAP9-AS1	0.12609	2.7e-05	0.669124	4.44e-16	6.6277	3.41e-11	#ERROR!
FAM133B	THAP9-AS1	0.581879	0	0.873502	0	6.62751	3.41e-11	#ERROR!
CCDC6	THAP9-AS1	0.330079	0	0.771979	0	6.62671	3.43e-11	#ERROR!
FKBP7	THAP9-AS1	0.228716	1.51e-14	0.723581	0	6.62667	3.43e-11	#ERROR!
BACH1	THAP9-AS1	0.307103	0	0.76128	0	6.62301	3.52e-11	#ERROR!
CDKL5	THAP9-AS1	0.276558	0	0.74686	0	6.62258	3.53e-11	#ERROR!
MAPK1	THAP9-AS1	0.328767	0	0.771185	0	6.62195	3.54e-11	#ERROR!
TSHZ2	THAP9-AS1	0.155421	2.16e-07	0.685005	0	6.62188	3.55e-11	#ERROR!
MAP2	THAP9-AS1	0.231548	7.11e-15	0.724709	0	6.62067	3.58e-11	#ERROR!
TUT4	THAP9-AS1	0.344036	0	0.778002	0	6.62027	3.59e-11	#ERROR!
SLC22A4	THAP9-AS1	0.138438	3.98e-06	0.675426	2.22e-16	6.6173	3.66e-11	#ERROR!
DDX46	THAP9-AS1	0.453547	0	0.824409	0	6.6168	3.67e-11	#ERROR!
STAM2	THAP9-AS1	0.348975	0	0.78006	0	6.6166	3.68e-11	#ERROR!
OGFRL1	THAP9-AS1	0.293772	0	0.75475	0	6.61624	3.68e-11	#ERROR!
HDAC2	THAP9-AS1	0.362605	0	0.786058	0	6.61562	3.7e-11	#ERROR!
THUMPD1	THAP9-AS1	0.416535	0	0.809176	0	6.61559	3.7e-11	#ERROR!
SHLD3	THAP9-AS1	0.437466	0	0.81775	0	6.61316	3.76e-11	#ERROR!
THOC2	THAP9-AS1	0.498509	0	0.84205	0	6.61279	3.77e-11	#ERROR!
PHF20	THAP9-AS1	0.367656	0	0.788156	0	6.61258	3.78e-11	#ERROR!
ABCB1	THAP9-AS1	0.164419	4.03e-08	0.689353	0	6.61221	3.79e-11	#ERROR!
HPS4	THAP9-AS1	0.400759	0	0.802333	0	6.61005	3.84e-11	#ERROR!
SPTY2D1	THAP9-AS1	0.354262	0	0.782089	0	6.60854	3.88e-11	#ERROR!
PTBP3	THAP9-AS1	0.456202	0	0.825122	0	6.60595	3.95e-11	#ERROR!
CDK7	THAP9-AS1	0.361913	0	0.785357	0	6.60558	3.96e-11	#ERROR!
SNX14	THAP9-AS1	0.356082	0	0.782775	0	6.60549	3.96e-11	#ERROR!
TMEM161B	THAP9-AS1	0.421928	0	0.811021	0	6.60419	4e-11	#ERROR!
RNF217	THAP9-AS1	0.148602	7.23e-07	0.680289	0	6.6039	4e-11	#ERROR!
DENR	THAP9-AS1	0.454992	0	0.824546	0	6.60328	4.02e-11	#ERROR!
RADX	THAP9-AS1	0.253552	0	0.73479	0	6.60306	4.03e-11	#ERROR!
DPY19L3	THAP9-AS1	0.405815	0	0.804175	0	6.60183	4.06e-11	#ERROR!
LINC00205	THAP9-AS1	0.349371	0	0.77954	0	6.59932	4.13e-11	#ERROR!
KBTBD3	THAP9-AS1	0.273827	0	0.744482	0	6.59927	4.13e-11	#ERROR!
TTC14	THAP9-AS1	0.40054	0	0.801841	0	6.59918	4.13e-11	#ERROR!
OAT	THAP9-AS1	0.288138	0	0.751294	0	6.5985	4.15e-11	#ERROR!
DAZAP2	THAP9-AS1	0.350513	0	0.780005	0	6.59821	4.16e-11	#ERROR!
ACBD3	THAP9-AS1	0.361955	0	0.785079	0	6.59806	4.17e-11	#ERROR!
PHF20L1	THAP9-AS1	0.435862	0	0.816553	0	6.59742	4.18e-11	#ERROR!
NUP205	THAP9-AS1	0.431696	0	0.814737	0	6.59458	4.26e-11	#ERROR!
GOLGB1	THAP9-AS1	0.323417	0	0.767533	0	6.59318	4.3e-11	#ERROR!
BBS5	THAP9-AS1	0.27381	0	0.744193	0	6.59314	4.31e-11	#ERROR!
IRAK4	THAP9-AS1	0.434971	0	0.816013	0	6.59239	4.33e-11	#ERROR!
LRRIQ1	THAP9-AS1	0.249047	0	0.732026	0	6.59167	4.35e-11	#ERROR!
LYRM2	THAP9-AS1	0.44243	0	0.819039	0	6.59129	4.36e-11	#ERROR!
LOC105369147	THAP9-AS1	0.244784	2.22e-16	0.729852	0	6.59043	4.39e-11	#ERROR!
TCTN1	THAP9-AS1	0.271911	0	0.743089	0	6.58909	4.43e-11	#ERROR!
EEF1AKMT2	THAP9-AS1	0.480433	0	0.834141	0	6.58553	4.53e-11	#ERROR!
LOC101930085	THAP9-AS1	0.287852	0	0.75056	0	6.58518	4.54e-11	#ERROR!
TNKS	THAP9-AS1	0.347213	0	0.777967	0	6.58434	4.57e-11	#ERROR!
CCDC66	THAP9-AS1	0.502725	0	0.842803	0	6.58334	4.6e-11	#ERROR!
TMEM41B	THAP9-AS1	0.411214	0	0.80578	0	6.58316	4.61e-11	#ERROR!
PIAS1	THAP9-AS1	0.399848	0	0.80091	0	6.58191	4.64e-11	#ERROR!
HSD17B3	THAP9-AS1	0.155284	2.21e-07	0.682732	0	6.58178	4.65e-11	#ERROR!
SEMA3E	THAP9-AS1	0.067081	0.025959	0.631996	6.06e-14	6.58068	4.68e-11	#ERROR!
SRSF1	THAP9-AS1	0.534855	0	0.854998	0	6.58043	4.69e-11	#ERROR!
PARP16	THAP9-AS1	0.363239	0	0.784909	0	6.57941	4.72e-11	#ERROR!
TMEM41A	THAP9-AS1	0.384646	0	0.794247	0	6.57856	4.75e-11	#ERROR!
LSM8	THAP9-AS1	0.475862	0	0.832079	0	6.57763	4.78e-11	#ERROR!
MICU2	THAP9-AS1	0.37682	0	0.790751	0	6.57616	4.83e-11	#ERROR!
BHLHE41	THAP9-AS1	0.173979	6.12e-09	0.692474	0	6.57461	4.88e-11	#ERROR!
RAB40A	THAP9-AS1	0.24207	4.44e-16	0.727702	0	6.57391	4.9e-11	#ERROR!
DCP1B	THAP9-AS1	0.381901	0	0.792877	0	6.57388	4.9e-11	#ERROR!
CDKN2AIP	THAP9-AS1	0.52327	0	0.850418	0	6.57368	4.91e-11	#ERROR!
ATF6	THAP9-AS1	0.383522	0	0.793473	0	6.57101	5e-11	#ERROR!
CDK12	THAP9-AS1	0.311948	0	0.761272	0	6.57078	5.01e-11	#ERROR!
PCM1	THAP9-AS1	0.280039	0	0.746124	0	6.56979	5.04e-11	#ERROR!
NXT2	THAP9-AS1	0.390086	0	0.796146	0	6.56655	5.15e-11	#ERROR!
RCBTB1	THAP9-AS1	0.369371	0	0.78707	0	6.56552	5.19e-11	#ERROR!
TTC28-AS1	THAP9-AS1	0.373213	0	0.788724	0	6.56461	5.22e-11	#ERROR!
CCDC125	THAP9-AS1	0.265977	0	0.739036	0	6.5639	5.24e-11	#ERROR!
ITGA9-AS1	THAP9-AS1	0.199316	2.45e-11	0.705331	0	6.56378	5.25e-11	#ERROR!
GATAD1	THAP9-AS1	0.467669	0	0.828336	0	6.56297	5.27e-11	#ERROR!
MED21	THAP9-AS1	0.367748	0	0.786246	0	6.56278	5.28e-11	#ERROR!
CCDC25	THAP9-AS1	0.307807	0	0.758974	0	6.56241	5.29e-11	#ERROR!
PLK2	THAP9-AS1	0.154842	2.4e-07	0.681399	0	6.56196	5.31e-11	#ERROR!
ENAH	THAP9-AS1	0.288681	0	0.749886	0	6.56141	5.33e-11	#ERROR!
PEX1	THAP9-AS1	0.462832	0	0.826319	0	6.56084	5.35e-11	#ERROR!
SGIP1	THAP9-AS1	0.157306	1.53e-07	0.682607	0	6.55936	5.4e-11	#ERROR!
KCTD6	THAP9-AS1	0.269986	0	0.740766	0	6.55907	5.41e-11	#ERROR!
CSE1L	THAP9-AS1	0.363025	0	0.783959	0	6.55781	5.46e-11	#ERROR!
RCOR1	THAP9-AS1	0.40377	0	0.80168	0	6.55739	5.48e-11	#ERROR!
BACE2	THAP9-AS1	0.172193	8.78e-09	0.690522	0	6.55617	5.52e-11	#ERROR!
EIF3EP1	THAP9-AS1	0.386923	0	0.794379	0	6.55605	5.53e-11	#ERROR!
DUSP12	THAP9-AS1	0.471263	0	0.829553	0	6.556	5.53e-11	#ERROR!
SLC30A7	THAP9-AS1	0.408451	0	0.803589	0	6.55504	5.56e-11	#ERROR!
FAM102B	THAP9-AS1	0.36229	0	0.783463	0	6.55353	5.62e-11	#ERROR!
SLC25A27	THAP9-AS1	0.29327	0	0.75171	0	6.55334	5.63e-11	#ERROR!
ARHGAP27P1-BPTFP1-KPNA2P3	THAP9-AS1	0.39344	0	0.797095	0	6.55329	5.63e-11	#ERROR!
ATP9B	THAP9-AS1	0.328265	0	0.767988	0	6.55127	5.7e-11	#ERROR!
TGFBRAP1	THAP9-AS1	0.389662	0	0.795374	0	6.55096	5.72e-11	#ERROR!
PRKAA1	THAP9-AS1	0.286174	0	0.74821	0	6.55087	5.72e-11	#ERROR!
C5orf63	THAP9-AS1	0.279516	0	0.744957	0	6.54978	5.76e-11	#ERROR!
PLA2R1	THAP9-AS1	0.193766	8.78e-11	0.701676	0	6.54957	5.77e-11	#ERROR!
PPP2R5C	THAP9-AS1	0.392117	0	0.796311	0	6.54765	5.85e-11	#ERROR!
FSIP2-AS2	THAP9-AS1	0.1893	2.38e-10	0.699203	0	6.54745	5.85e-11	#ERROR!
MIS18A	THAP9-AS1	0.398753	0	0.799136	0	6.54669	5.88e-11	#ERROR!
PCGF5	THAP9-AS1	0.314715	0	0.761515	0	6.54661	5.89e-11	#ERROR!
PM20D2	THAP9-AS1	0.247506	0	0.729081	0	6.54628	5.9e-11	#ERROR!
TRIM4	THAP9-AS1	0.37006	0	0.786602	0	6.54585	5.92e-11	#ERROR!
TRPM3	THAP9-AS1	0.098065	0.001116	0.648272	8.44e-15	6.54553	5.93e-11	#ERROR!
TMEM232	THAP9-AS1	0.117737	8.94e-05	0.659662	1.78e-15	6.5455	5.93e-11	#ERROR!
SDR42E1	THAP9-AS1	0.209115	2.36e-12	0.709477	0	6.54508	5.95e-11	#ERROR!
LMAN1	THAP9-AS1	0.343239	0	0.774541	0	6.54444	5.97e-11	#ERROR!
BACH2	THAP9-AS1	0.179573	1.93e-09	0.693796	0	6.54326	6.02e-11	#ERROR!
GPCPD1	THAP9-AS1	0.319952	0	0.763754	0	6.54201	6.07e-11	#ERROR!
CDIN1	THAP9-AS1	0.368607	0	0.785798	0	6.54174	6.08e-11	#ERROR!
SH3RF1	THAP9-AS1	0.342771	0	0.774175	0	6.54073	6.12e-11	#ERROR!
KAT7	THAP9-AS1	0.371403	0	0.786967	0	6.54001	6.15e-11	#ERROR!
FAR1	THAP9-AS1	0.394472	0	0.79703	0	6.53969	6.16e-11	#ERROR!
COX11	THAP9-AS1	0.430171	0	0.812161	0	6.53879	6.2e-11	#ERROR!
AREL1	THAP9-AS1	0.40968	0	0.803484	0	6.53783	6.24e-11	#ERROR!
CATSPERB	THAP9-AS1	0.094473	0.001692	0.645672	1.15e-14	6.5373	6.26e-11	#ERROR!
CFAP91	THAP9-AS1	0.251384	0	0.7304	0	6.53351	6.42e-11	#ERROR!
CNOT9	THAP9-AS1	0.504464	0	0.841933	0	6.53161	6.51e-11	#ERROR!
NRDE2	THAP9-AS1	0.377395	0	0.789272	0	6.53143	6.51e-11	#ERROR!
CDC40	THAP9-AS1	0.373145	0	0.787389	0	6.53115	6.53e-11	#ERROR!
TRNT1	THAP9-AS1	0.463534	0	0.825628	0	6.53106	6.53e-11	#ERROR!
CSNK1G1	THAP9-AS1	0.383119	0	0.791723	0	6.52991	6.58e-11	#ERROR!
RAD50	THAP9-AS1	0.337149	0	0.771128	0	6.52903	6.62e-11	#ERROR!
PDLIM5	THAP9-AS1	0.249915	0	0.729329	0	6.52649	6.73e-11	#ERROR!
IQGAP2	THAP9-AS1	0.129778	1.55e-05	0.665351	8.88e-16	6.52522	6.79e-11	#ERROR!
TMEM106B	THAP9-AS1	0.301159	0	0.754159	0	6.52421	6.84e-11	#ERROR!
RBBP5	THAP9-AS1	0.384718	0	0.792169	0	6.52331	6.88e-11	#ERROR!
RFX3-AS1	THAP9-AS1	0.280176	0	0.743985	0	6.52164	6.95e-11	#ERROR!
C2orf42	THAP9-AS1	0.440639	0	0.815912	0	6.52134	6.97e-11	#ERROR!
AGGF1	THAP9-AS1	0.367421	0	0.784333	0	6.51798	7.13e-11	#ERROR!
DUS4L	THAP9-AS1	0.539351	0	0.854943	0	6.51707	7.17e-11	#ERROR!
PIGB	THAP9-AS1	0.362889	0	0.782247	0	6.51632	7.21e-11	#ERROR!
KCNIP4	THAP9-AS1	0.458341	0	0.822993	0	6.51523	7.26e-11	#ERROR!
C21orf91	THAP9-AS1	0.331803	0	0.768016	0	6.51336	7.35e-11	#ERROR!
TTC5	THAP9-AS1	0.370567	0	0.785507	0	6.5123	7.4e-11	#ERROR!
APPL1	THAP9-AS1	0.392012	0	0.794926	0	6.5122	7.41e-11	#ERROR!
PRPF3	THAP9-AS1	0.475518	0	0.829857	0	6.51219	7.41e-11	#ERROR!
TTC30B	THAP9-AS1	0.321118	0	0.762996	0	6.51176	7.43e-11	#ERROR!
PCF11	THAP9-AS1	0.445607	0	0.817576	0	6.50985	7.52e-11	#ERROR!
GTF2H2C	THAP9-AS1	0.329861	0	0.766934	0	6.50896	7.57e-11	#ERROR!
CRLF3	THAP9-AS1	0.475867	0	0.829893	0	6.50895	7.57e-11	#ERROR!
SNX25	THAP9-AS1	0.344256	0	0.773537	0	6.50892	7.57e-11	#ERROR!
AQR	THAP9-AS1	0.38063	0	0.789818	0	6.50881	7.57e-11	#ERROR!
JKAMP	THAP9-AS1	0.323022	0	0.763673	0	6.50687	7.67e-11	#ERROR!
FAF2	THAP9-AS1	0.3908	0	0.794192	0	6.50675	7.68e-11	#ERROR!
AGK	THAP9-AS1	0.503847	0	0.840938	0	6.50657	7.69e-11	#ERROR!
TOPBP1	THAP9-AS1	0.468315	0	0.82675	0	6.50608	7.71e-11	#ERROR!
GNPTAB	THAP9-AS1	0.353383	0	0.777497	0	6.50448	7.8e-11	#ERROR!
SLC25A21-AS1	THAP9-AS1	0.218893	2.02e-13	0.71242	0	6.50334	7.86e-11	#ERROR!
DTWD1	THAP9-AS1	0.408976	0	0.80185	0	6.50143	7.96e-11	#ERROR!
POLA1	THAP9-AS1	0.415385	0	0.804582	0	6.50123	7.97e-11	#ERROR!
EFCAB6	THAP9-AS1	0.200726	1.76e-11	0.70281	0	6.50096	7.98e-11	#ERROR!
PRPSAP2	THAP9-AS1	0.41743	0	0.805316	0	6.49747	8.17e-11	#ERROR!
CNOT10	THAP9-AS1	0.473669	0	0.828619	0	6.49689	8.2e-11	#ERROR!
RLIM	THAP9-AS1	0.42032	0	0.80647	0	6.49538	8.28e-11	#ERROR!
HEATR4	THAP9-AS1	0.217316	3.02e-13	0.711156	0	6.49453	8.33e-11	#ERROR!
CEP120	THAP9-AS1	0.3636	0	0.781679	0	6.49419	8.35e-11	#ERROR!
P2RX7	THAP9-AS1	0.230555	9.33e-15	0.717935	0	6.49369	8.38e-11	#ERROR!
SYPL1	THAP9-AS1	0.329431	0	0.766061	0	6.4931	8.41e-11	#ERROR!
SYT1	THAP9-AS1	0.13152	1.19e-05	0.664483	8.88e-16	6.49289	8.42e-11	#ERROR!
MPHOSPH10	THAP9-AS1	0.553764	0	0.859691	0	6.49147	8.5e-11	#ERROR!
RRP15	THAP9-AS1	0.423475	0	0.807629	0	6.49038	8.56e-11	#ERROR!
LCLAT1	THAP9-AS1	0.377845	0	0.787862	0	6.49011	8.58e-11	#ERROR!
ARGLU1	THAP9-AS1	0.492638	0	0.836005	0	6.49004	8.58e-11	#ERROR!
CHIC1	THAP9-AS1	0.327991	0	0.765241	0	6.48953	8.61e-11	#ERROR!
HP1BP3	THAP9-AS1	0.477382	0	0.829838	0	6.4882	8.69e-11	#ERROR!
GOLM2	THAP9-AS1	0.292643	0	0.748333	0	6.48502	8.87e-11	#ERROR!
MCPH1	THAP9-AS1	0.382204	0	0.789544	0	6.48387	8.94e-11	#ERROR!
CTBS	THAP9-AS1	0.264661	0	0.73458	0	6.48297	8.99e-11	#ERROR!
CCDC112	THAP9-AS1	0.429974	0	0.810106	0	6.48279	9e-11	#ERROR!
NR2F2-AS1	THAP9-AS1	0.173976	6.13e-09	0.687495	0	6.48235	9.03e-11	#ERROR!
KIAA1671	THAP9-AS1	0.269722	0	0.737001	0	6.48129	9.09e-11	#ERROR!
C10orf88	THAP9-AS1	0.488934	0	0.834252	0	6.48117	9.1e-11	#ERROR!
GPBP1L1	THAP9-AS1	0.516386	0	0.845076	0	6.48083	9.12e-11	#ERROR!
RFC5	THAP9-AS1	0.451217	0	0.818856	0	6.47927	9.22e-11	#ERROR!
ARL15	THAP9-AS1	0.206028	4.99e-12	0.704463	0	6.47904	9.23e-11	#ERROR!
APOBEC3D	THAP9-AS1	0.187199	3.78e-10	0.694447	0	6.47881	9.24e-11	#ERROR!
KBTBD7	THAP9-AS1	0.371079	0	0.784408	0	6.47873	9.25e-11	#ERROR!
BTBD11	THAP9-AS1	0.098563	0.001052	0.644472	1.33e-14	6.47724	9.34e-11	#ERROR!
RBBP4	THAP9-AS1	0.457869	0	0.821489	0	6.47598	9.42e-11	#ERROR!
APPL2	THAP9-AS1	0.35688	0	0.77789	0	6.47529	9.46e-11	#ERROR!
CNNM1	THAP9-AS1	0.067891	0.02421	0.625919	1.23e-13	6.47512	9.47e-11	#ERROR!
SKAP1	THAP9-AS1	0.121643	5.15e-05	0.657721	2.44e-15	6.47373	9.56e-11	#ERROR!
CAPN14	THAP9-AS1	0.141025	2.61e-06	0.668727	4.44e-16	6.47302	9.61e-11	#ERROR!
ITGB8	THAP9-AS1	0.220029	1.51e-13	0.711441	0	6.47248	9.64e-11	#ERROR!
CPSF7	THAP9-AS1	0.494284	0	0.836059	0	6.47066	9.76e-11	#ERROR!
AASDH	THAP9-AS1	0.500977	0	0.838689	0	6.46974	9.82e-11	#ERROR!
FDXACB1	THAP9-AS1	0.296912	0	0.749667	0	6.46912	9.86e-11	#ERROR!
EPB41L5	THAP9-AS1	0.29367	0	0.748082	0	6.46857	9.89e-11	#ERROR!
PMS1	THAP9-AS1	0.565593	0	0.863519	0	6.46847	9.9e-11	#ERROR!
LDLRAD4	THAP9-AS1	0.251847	0	0.727472	0	6.46803	9.93e-11	#ERROR!
PRELID3B	THAP9-AS1	0.436298	0	0.812182	0	6.46614	1.01e-10	#ERROR!
CBX3	THAP9-AS1	0.48757	0	0.8332	0	6.46504	1.01e-10	#ERROR!
SCN8A	THAP9-AS1	0.216203	4.02e-13	0.709058	0	6.46477	1.01e-10	#ERROR!
TMEM87A	THAP9-AS1	0.365615	0	0.781398	0	6.46461	1.02e-10	#ERROR!
C1orf21	THAP9-AS1	0.114866	0.000133	0.653229	4.44e-15	6.46398	1.02e-10	#ERROR!
PNRC2	THAP9-AS1	0.433108	0	0.81075	0	6.46362	1.02e-10	#ERROR!
SIK3	THAP9-AS1	0.261048	0	0.731848	0	6.46328	1.02e-10	#ERROR!
METTL3	THAP9-AS1	0.448369	0	0.817126	0	6.46317	1.03e-10	#ERROR!
C11orf71	THAP9-AS1	0.220557	1.31e-13	0.711223	0	6.46279	1.03e-10	#ERROR!
CCDC191	THAP9-AS1	0.359937	0	0.778693	0	6.461	1.04e-10	#ERROR!
TRIM66	THAP9-AS1	0.357141	0	0.777365	0	6.45948	1.05e-10	#ERROR!
FAM133A	THAP9-AS1	0.05955	0.048115	0.619662	2.53e-13	6.45719	1.07e-10	#ERROR!
CAPN7	THAP9-AS1	0.407033	0	0.799301	0	6.45514	1.08e-10	#ERROR!
CFAP54	THAP9-AS1	0.153037	3.31e-07	0.674442	2.22e-16	6.45488	1.08e-10	#ERROR!
CD59	THAP9-AS1	0.161006	7.71e-08	0.678771	0	6.45308	1.1e-10	#ERROR!
RPRD1B	THAP9-AS1	0.416453	0	0.803272	0	6.45273	1.1e-10	#ERROR!
CTCF	THAP9-AS1	0.425631	0	0.807175	0	6.45219	1.1e-10	#ERROR!
CLCN3	THAP9-AS1	0.391286	0	0.792299	0	6.4516	1.11e-10	#ERROR!
DMC1	THAP9-AS1	0.212304	1.07e-12	0.706267	0	6.45018	1.12e-10	#ERROR!
CRYZL2P	THAP9-AS1	0.260373	0	0.730845	0	6.44937	1.12e-10	#ERROR!
PAK3	THAP9-AS1	0.202948	1.04e-11	0.701151	0	6.44669	1.14e-10	#ERROR!
RPL7L1	THAP9-AS1	0.540414	0	0.853388	0	6.44665	1.14e-10	#ERROR!
DDX60	THAP9-AS1	0.282459	0	0.741625	0	6.44644	1.15e-10	#ERROR!
BROX	THAP9-AS1	0.38618	0	0.789812	0	6.44546	1.15e-10	#ERROR!
COX10-AS1	THAP9-AS1	0.347102	0	0.772203	0	6.44535	1.15e-10	#ERROR!
NEDD1	THAP9-AS1	0.403569	0	0.797353	0	6.44321	1.17e-10	#ERROR!
OSBPL3	THAP9-AS1	0.229852	1.11e-14	0.715022	0	6.44277	1.17e-10	#ERROR!
KIF3A	THAP9-AS1	0.376351	0	0.785336	0	6.44268	1.17e-10	#ERROR!
FBXL3	THAP9-AS1	0.32242	0	0.760588	0	6.44193	1.18e-10	#ERROR!
GLUD1P3	THAP9-AS1	0.405787	0	0.79818	0	6.43956	1.2e-10	#ERROR!
RBMXL1	THAP9-AS1	0.405703	0	0.798099	0	6.43837	1.21e-10	#ERROR!
TIGD4	THAP9-AS1	0.368615	0	0.781688	0	6.43815	1.21e-10	#ERROR!
RABL2A	THAP9-AS1	0.410985	0	0.800341	0	6.43708	1.22e-10	#ERROR!
CATSPERG	THAP9-AS1	0.145505	1.23e-06	0.669207	4.44e-16	6.43704	1.22e-10	#ERROR!
GASK1B	THAP9-AS1	0.139955	3.11e-06	0.666041	8.88e-16	6.43659	1.22e-10	#ERROR!
HCG18	THAP9-AS1	0.472532	0	0.826177	0	6.43593	1.23e-10	#ERROR!
LRCH1	THAP9-AS1	0.333855	0	0.765662	0	6.43545	1.23e-10	#ERROR!
SLAIN1	THAP9-AS1	0.175567	4.43e-09	0.685747	0	6.43428	1.24e-10	#ERROR!
KIF20B	THAP9-AS1	0.417366	0	0.802868	0	6.43093	1.27e-10	#ERROR!
HOXA3	THAP9-AS1	0.087325	0.003718	0.634952	4.26e-14	6.43083	1.27e-10	#ERROR!
BMT2	THAP9-AS1	0.417634	0	0.80287	0	6.42783	1.29e-10	#ERROR!
TLR2	THAP9-AS1	0.188039	3.15e-10	0.692165	0	6.42767	1.3e-10	#ERROR!
SSR1	THAP9-AS1	0.35067	0	0.773069	0	6.42675	1.3e-10	#ERROR!
ANKRD18EP	THAP9-AS1	0.362457	0	0.778441	0	6.42663	1.3e-10	#ERROR!
IKBKB	THAP9-AS1	0.315222	0	0.756513	0	6.42652	1.31e-10	#ERROR!
TIPRL	THAP9-AS1	0.455865	0	0.818989	0	6.42633	1.31e-10	#ERROR!
PARP12	THAP9-AS1	0.287798	0	0.743218	0	6.42447	1.32e-10	#ERROR!
LRTOMT	THAP9-AS1	0.223446	6.17e-14	0.710768	0	6.42435	1.32e-10	#ERROR!
NKAPD1	THAP9-AS1	0.454006	0	0.818088	0	6.42259	1.34e-10	#ERROR!
DCLRE1A	THAP9-AS1	0.420383	0	0.803853	0	6.42236	1.34e-10	#ERROR!
GCA	THAP9-AS1	0.39711	0	0.793648	0	6.4199	1.36e-10	#ERROR!
TIMM8A	THAP9-AS1	0.381067	0	0.78648	0	6.41828	1.38e-10	#ERROR!
SLC26A2	THAP9-AS1	0.251885	0	0.725052	0	6.4179	1.38e-10	#ERROR!
RBM45	THAP9-AS1	0.520101	0	0.844668	0	6.41769	1.38e-10	#ERROR!
RWDD3	THAP9-AS1	0.492309	0	0.8336	0	6.41718	1.39e-10	#ERROR!
SLC35D1	THAP9-AS1	0.329019	0	0.762591	0	6.41653	1.39e-10	#ERROR!
FUBP1	THAP9-AS1	0.500845	0	0.836918	0	6.41374	1.42e-10	#ERROR!
TMED7	THAP9-AS1	0.299481	0	0.74838	0	6.41327	1.42e-10	#ERROR!
RNF103	THAP9-AS1	0.300347	0	0.74877	0	6.41263	1.43e-10	#ERROR!
DOP1A	THAP9-AS1	0.386391	0	0.788545	0	6.41042	1.45e-10	#ERROR!
DENND2D	THAP9-AS1	0.28818	0	0.742713	0	6.40947	1.46e-10	#ERROR!
PURB	THAP9-AS1	0.440894	0	0.812078	0	6.40792	1.48e-10	#ERROR!
MRRF	THAP9-AS1	0.503733	0	0.837881	0	6.40753	1.48e-10	#ERROR!
C16orf87	THAP9-AS1	0.309441	0	0.752838	0	6.40583	1.5e-10	#ERROR!
SPICE1	THAP9-AS1	0.411372	0	0.799347	0	6.40575	1.5e-10	#ERROR!
SCYL3	THAP9-AS1	0.413162	0	0.800078	0	6.4045	1.51e-10	#ERROR!
TPH1	THAP9-AS1	0.258842	0	0.727914	0	6.40449	1.51e-10	#ERROR!
CTNND1	THAP9-AS1	0.367098	0	0.779537	0	6.40171	1.54e-10	#ERROR!
SESN3	THAP9-AS1	0.120813	5.8e-05	0.652946	4.66e-15	6.40061	1.55e-10	#ERROR!
PARG	THAP9-AS1	0.440683	0	0.811721	0	6.40026	1.55e-10	#ERROR!
PPP4R1	THAP9-AS1	0.387201	0	0.788503	0	6.4001	1.55e-10	#ERROR!
QRICH1	THAP9-AS1	0.455602	0	0.81798	0	6.39987	1.56e-10	#ERROR!
SGPL1	THAP9-AS1	0.289948	0	0.743107	0	6.39928	1.56e-10	#ERROR!
GTPBP10	THAP9-AS1	0.539556	0	0.851666	0	6.39721	1.58e-10	#ERROR!
NOL9	THAP9-AS1	0.48406	0	0.829611	0	6.39675	1.59e-10	#ERROR!
ADPGK	THAP9-AS1	0.495103	0	0.834056	0	6.39584	1.6e-10	#ERROR!
SRSF11	THAP9-AS1	0.609957	0	0.878091	0	6.39581	1.6e-10	#ERROR!
SEC61A2	THAP9-AS1	0.462618	0	0.820746	0	6.39529	1.6e-10	#ERROR!
GARNL3	THAP9-AS1	0.302669	0	0.74907	0	6.39446	1.61e-10	#ERROR!
CCSER1	THAP9-AS1	0.269083	0	0.732549	0	6.39401	1.62e-10	#ERROR!
FAM135A	THAP9-AS1	0.308753	0	0.751932	0	6.39292	1.63e-10	#ERROR!
IPCEF1	THAP9-AS1	0.168062	1.99e-08	0.679293	0	6.39205	1.64e-10	#ERROR!
GSK3B	THAP9-AS1	0.36421	0	0.77783	0	6.39198	1.64e-10	#ERROR!
GK	THAP9-AS1	0.298036	0	0.746709	0	6.39189	1.64e-10	#ERROR!
RALGAPB	THAP9-AS1	0.400818	0	0.794188	0	6.39127	1.65e-10	#ERROR!
SLC13A3	THAP9-AS1	0.197043	4.15e-11	0.695008	0	6.39008	1.66e-10	#ERROR!
MRPL42	THAP9-AS1	0.508964	0	0.839417	0	6.38949	1.66e-10	#ERROR!
TBC1D32	THAP9-AS1	0.423781	0	0.804114	0	6.38938	1.67e-10	#ERROR!
DERL2	THAP9-AS1	0.340678	0	0.766739	0	6.386	1.7e-10	#ERROR!
ALOX12-AS1	THAP9-AS1	0.388825	0	0.788613	0	6.38436	1.72e-10	#ERROR!
MSH2	THAP9-AS1	0.46663	0	0.822033	0	6.38401	1.73e-10	#ERROR!
TRIM52	THAP9-AS1	0.418847	0	0.801763	0	6.38338	1.73e-10	#ERROR!
HSP90AA1	THAP9-AS1	0.265635	0	0.730264	0	6.38235	1.74e-10	#ERROR!
SMARCAD1	THAP9-AS1	0.553068	0	0.85645	0	6.38183	1.75e-10	#ERROR!
CYP7B1	THAP9-AS1	0.142203	2.14e-06	0.664158	1.11e-15	6.3815	1.75e-10	#ERROR!
PCBD2	THAP9-AS1	0.397155	0	0.792159	0	6.38045	1.77e-10	#ERROR!
SCYL2	THAP9-AS1	0.379105	0	0.784092	0	6.38004	1.77e-10	#ERROR!
GAPT	THAP9-AS1	0.11955	6.94e-05	0.650908	6e-15	6.37863	1.79e-10	#ERROR!
SERP2	THAP9-AS1	0.072363	0.016279	0.62254	1.82e-13	6.3777	1.8e-10	#ERROR!
THAP5	THAP9-AS1	0.446607	0	0.813423	0	6.3773	1.8e-10	#ERROR!
APBA1	THAP9-AS1	0.212628	9.88e-13	0.70245	0	6.3733	1.85e-10	#ERROR!
LINC00506	THAP9-AS1	0.218261	2.38e-13	0.705372	0	6.37218	1.86e-10	#ERROR!
TMEM128	THAP9-AS1	0.468126	0	0.822214	0	6.37085	1.88e-10	#ERROR!
KITLG	THAP9-AS1	0.157288	1.54e-07	0.671984	4.44e-16	6.36892	1.9e-10	#ERROR!
NBR1	THAP9-AS1	0.321506	0	0.756947	0	6.36847	1.91e-10	#ERROR!
PCDHB4	THAP9-AS1	0.145499	1.23e-06	0.66502	8.88e-16	6.36383	1.97e-10	#ERROR!
STK26	THAP9-AS1	0.252613	0	0.722706	0	6.36248	1.99e-10	#ERROR!
DNAH7	THAP9-AS1	0.189726	2.17e-10	0.689531	0	6.36175	1.99e-10	#ERROR!
C15orf40	THAP9-AS1	0.405882	0	0.795288	0	6.36154	2e-10	#ERROR!
PJVK	THAP9-AS1	0.369508	0	0.778985	0	6.36099	2e-10	#ERROR!
ARL14EP	THAP9-AS1	0.447481	0	0.81315	0	6.35886	2.03e-10	#ERROR!
RPAP3	THAP9-AS1	0.466101	0	0.820943	0	6.35801	2.04e-10	#ERROR!
RSF1	THAP9-AS1	0.377361	0	0.78238	0	6.35678	2.06e-10	#ERROR!
CADPS2	THAP9-AS1	0.168632	1.78e-08	0.677603	2.22e-16	6.35594	2.07e-10	#ERROR!
GPR89B	THAP9-AS1	0.459889	0	0.818223	0	6.35435	2.09e-10	#ERROR!
TMEM170A	THAP9-AS1	0.484909	0	0.828588	0	6.35419	2.1e-10	#ERROR!
TRAF6	THAP9-AS1	0.361911	0	0.775226	0	6.35399	2.1e-10	#ERROR!
DTX3L	THAP9-AS1	0.289925	0	0.740997	0	6.35391	2.1e-10	#ERROR!
INSIG2	THAP9-AS1	0.33836	0	0.764265	0	6.35342	2.11e-10	#ERROR!
ANAPC4	THAP9-AS1	0.613493	0	0.878323	0	6.35077	2.14e-10	#ERROR!
RAD9B	THAP9-AS1	0.357414	0	0.772964	0	6.34934	2.16e-10	#ERROR!
DOCK1	THAP9-AS1	0.309764	0	0.750462	0	6.34931	2.16e-10	#ERROR!
JADE3	THAP9-AS1	0.365533	0	0.776671	0	6.34871	2.17e-10	#ERROR!
KIAA1217	THAP9-AS1	0.330894	0	0.760497	0	6.34768	2.19e-10	#ERROR!
KRBOX4	THAP9-AS1	0.521169	0	0.842983	0	6.34661	2.2e-10	#ERROR!
ARID4B	THAP9-AS1	0.468324	0	0.821472	0	6.34618	2.21e-10	#ERROR!
SUPT16H	THAP9-AS1	0.420614	0	0.801131	0	6.34539	2.22e-10	#ERROR!
CBR3-AS1	THAP9-AS1	0.195466	5.96e-11	0.691657	0	6.34331	2.25e-10	#ERROR!
PGAP1	THAP9-AS1	0.336915	0	0.763005	0	6.33989	2.3e-10	#ERROR!
BBS9	THAP9-AS1	0.339847	0	0.764369	0	6.33954	2.3e-10	#ERROR!
FBXO3	THAP9-AS1	0.39523	0	0.789726	0	6.33951	2.3e-10	#ERROR!
PSTPIP2	THAP9-AS1	0.275215	0	0.732982	0	6.33878	2.32e-10	#ERROR!
SF3A1	THAP9-AS1	0.342143	0	0.76536	0	6.33749	2.34e-10	#ERROR!
SFT2D2	THAP9-AS1	0.408104	0	0.795141	0	6.3318	2.42e-10	#ERROR!
MTMR8	THAP9-AS1	0.21428	6.53e-13	0.701129	0	6.33121	2.43e-10	#ERROR!
ANKRD31	THAP9-AS1	0.251106	0	0.720365	0	6.33068	2.44e-10	#ERROR!
MAGEE1	THAP9-AS1	0.24917	0	0.719345	0	6.33016	2.45e-10	#ERROR!
POGK	THAP9-AS1	0.476367	0	0.824246	0	6.32907	2.47e-10	#ERROR!
SLC25A17	THAP9-AS1	0.349873	0	0.768489	0	6.32599	2.52e-10	#ERROR!
KAZN	THAP9-AS1	0.300341	0	0.744657	0	6.32241	2.58e-10	#ERROR!
EIF3L	THAP9-AS1	0.25875	0	0.723764	0	6.32024	2.61e-10	#ERROR!
RALGAPA1	THAP9-AS1	0.315104	0	0.751717	0	6.3198	2.62e-10	#ERROR!
TERF2	THAP9-AS1	0.389236	0	0.786267	0	6.3197	2.62e-10	#ERROR!
SMC5	THAP9-AS1	0.468062	0	0.820423	0	6.31819	2.65e-10	#ERROR!
INTS14	THAP9-AS1	0.4442	0	0.81029	0	6.31718	2.66e-10	#ERROR!
STT3B	THAP9-AS1	0.336804	0	0.7619	0	6.31548	2.69e-10	#ERROR!
KDM5B	THAP9-AS1	0.378037	0	0.780976	0	6.31407	2.72e-10	#ERROR!
GCSAM	THAP9-AS1	0.257848	0	0.722962	0	6.3133	2.73e-10	#ERROR!
NFYA	THAP9-AS1	0.438035	0	0.807502	0	6.31319	2.73e-10	#ERROR!
ITGA2	THAP9-AS1	0.160401	8.63e-08	0.670497	4.44e-16	6.31161	2.76e-10	#ERROR!
COG6	THAP9-AS1	0.380301	0	0.781876	0	6.31084	2.78e-10	#ERROR!
RPAP2	THAP9-AS1	0.442485	0	0.809239	0	6.30827	2.82e-10	#ERROR!
TXNRD3	THAP9-AS1	0.298316	0	0.742982	0	6.30758	2.83e-10	#ERROR!
SCAPER	THAP9-AS1	0.385614	0	0.784098	0	6.30614	2.86e-10	#ERROR!
TOMM20L	THAP9-AS1	0.272206	0	0.729898	0	6.30595	2.86e-10	#ERROR!
AJUBA	THAP9-AS1	0.208395	2.81e-12	0.696633	0	6.30567	2.87e-10	#ERROR!
AMD1	THAP9-AS1	0.363364	0	0.773898	0	6.30551	2.87e-10	#ERROR!
PRDM11	THAP9-AS1	0.317405	0	0.752156	0	6.30476	2.89e-10	#ERROR!
SLC4A5	THAP9-AS1	0.4369	0	0.806702	0	6.30456	2.89e-10	#ERROR!
PALB2	THAP9-AS1	0.488686	0	0.828505	0	6.30357	2.91e-10	#ERROR!
PBX1	THAP9-AS1	0.296083	0	0.741671	0	6.30302	2.92e-10	#ERROR!
GOLGA5	THAP9-AS1	0.333484	0	0.759735	0	6.30187	2.94e-10	#ERROR!
RBBP6	THAP9-AS1	0.547315	0	0.851989	0	6.30169	2.94e-10	#ERROR!
TMPO	THAP9-AS1	0.461233	0	0.816931	0	6.29994	2.98e-10	#ERROR!
PTPN2	THAP9-AS1	0.463346	0	0.81773	0	6.2972	3.03e-10	#ERROR!
AP2B1	THAP9-AS1	0.313261	0	0.749776	0	6.29645	3.05e-10	#ERROR!
ACTR8	THAP9-AS1	0.411625	0	0.795333	0	6.29575	3.06e-10	#ERROR!
ARMT1	THAP9-AS1	0.17718	3.18e-09	0.679011	0	6.29568	3.06e-10	#ERROR!
ARMCX2	THAP9-AS1	0.25136	0	0.718701	0	6.29453	3.08e-10	#ERROR!
FAM171B	THAP9-AS1	0.239383	8.88e-16	0.712411	0	6.29312	3.11e-10	#ERROR!
NUP58	THAP9-AS1	0.45509	0	0.814089	0	6.29303	3.11e-10	#ERROR!
CROT	THAP9-AS1	0.180999	1.43e-09	0.680941	0	6.29221	3.13e-10	#ERROR!
STEAP2	THAP9-AS1	0.144915	1.36e-06	0.660412	1.78e-15	6.2898	3.18e-10	#ERROR!
PLS1	THAP9-AS1	0.195954	5.33e-11	0.688979	0	6.2887	3.2e-10	#ERROR!
HSP90B1	THAP9-AS1	0.281148	0	0.733466	0	6.28648	3.25e-10	#ERROR!
PODXL	THAP9-AS1	0.268204	0	0.726851	0	6.28484	3.28e-10	#ERROR!
BBX	THAP9-AS1	0.353211	0	0.768304	0	6.28462	3.29e-10	#ERROR!
MED1	THAP9-AS1	0.300458	0	0.742963	0	6.28432	3.29e-10	#ERROR!
KLHL12	THAP9-AS1	0.410906	0	0.794568	0	6.28396	3.3e-10	#ERROR!
ARHGAP32	THAP9-AS1	0.280562	0	0.733047	0	6.28387	3.3e-10	#ERROR!
CFAP70	THAP9-AS1	0.252986	0	0.718994	0	6.28355	3.31e-10	#ERROR!
NKAPP1	THAP9-AS1	0.350773	0	0.7671	0	6.28315	3.32e-10	#ERROR!
SNHG28	THAP9-AS1	0.278225	0	0.731833	0	6.28304	3.32e-10	#ERROR!
C11orf54	THAP9-AS1	0.341825	0	0.762836	0	6.28207	3.34e-10	#ERROR!
SEC23B	THAP9-AS1	0.254462	0	0.719667	0	6.28179	3.35e-10	#ERROR!
NAPG	THAP9-AS1	0.437936	0	0.806306	0	6.2811	3.36e-10	#ERROR!
EPHA4	THAP9-AS1	0.1081	0.000324	0.638175	2.89e-14	6.27973	3.39e-10	#ERROR!
BRD7	THAP9-AS1	0.367782	0	0.774829	0	6.27857	3.42e-10	#ERROR!
PALLD	THAP9-AS1	0.212318	1.07e-12	0.697304	0	6.27848	3.42e-10	#ERROR!
GTF2IRD2	THAP9-AS1	0.345042	0	0.764178	0	6.2779	3.43e-10	#ERROR!
RFWD3	THAP9-AS1	0.380984	0	0.780851	0	6.27752	3.44e-10	#ERROR!
INTS7	THAP9-AS1	0.373319	0	0.777252	0	6.27539	3.49e-10	#ERROR!
RAG1	THAP9-AS1	0.187337	3.67e-10	0.683511	0	6.27519	3.49e-10	#ERROR!
KIAA1143	THAP9-AS1	0.442197	0	0.807916	0	6.27462	3.5e-10	#ERROR!
ERICH2	THAP9-AS1	0.110683	0.000232	0.63938	2.49e-14	6.27411	3.52e-10	#ERROR!
C5orf22	THAP9-AS1	0.414819	0	0.795834	0	6.2716	3.57e-10	#ERROR!
RBM11	THAP9-AS1	0.282308	0	0.733317	0	6.27112	3.58e-10	#ERROR!
RABEP1	THAP9-AS1	0.214735	5.82e-13	0.698169	0	6.27025	3.6e-10	#ERROR!
MNS1	THAP9-AS1	0.31696	0	0.750386	0	6.27012	3.61e-10	#ERROR!
SCAF11	THAP9-AS1	0.408994	0	0.793169	0	6.26954	3.62e-10	#ERROR!
POLE2	THAP9-AS1	0.370438	0	0.775684	0	6.26952	3.62e-10	#ERROR!
NOXRED1	THAP9-AS1	0.3062	0	0.745096	0	6.26932	3.63e-10	#ERROR!
NOL8	THAP9-AS1	0.519368	0	0.839911	0	6.26838	3.65e-10	#ERROR!
HS2ST1	THAP9-AS1	0.386148	0	0.782833	0	6.26823	3.65e-10	#ERROR!
PIK3R1	THAP9-AS1	0.195285	6.22e-11	0.687488	0	6.26793	3.66e-10	#ERROR!
CREBZF	THAP9-AS1	0.479783	0	0.823643	0	6.26783	3.66e-10	#ERROR!
TBC1D9	THAP9-AS1	0.167867	2.07e-08	0.672221	4.44e-16	6.26758	3.67e-10	#ERROR!
EDRF1	THAP9-AS1	0.520201	0	0.840198	0	6.2668	3.69e-10	#ERROR!
GLCE	THAP9-AS1	0.251423	0	0.717344	0	6.26668	3.69e-10	#ERROR!
PPWD1	THAP9-AS1	0.516113	0	0.838528	0	6.26617	3.7e-10	#ERROR!
LURAP1	THAP9-AS1	0.084012	0.00526	0.622652	1.8e-13	6.26565	3.71e-10	#ERROR!
SENP1	THAP9-AS1	0.512665	0	0.837114	0	6.26561	3.71e-10	#ERROR!
THUMPD3-AS1	THAP9-AS1	0.50354	0	0.833369	0	6.26481	3.73e-10	#ERROR!
PIFO	THAP9-AS1	0.147951	8.1e-07	0.660705	1.78e-15	6.26472	3.74e-10	#ERROR!
FAM161B	THAP9-AS1	0.204017	8.09e-12	0.692044	0	6.26403	3.75e-10	#ERROR!
INTS6	THAP9-AS1	0.399764	0	0.788774	0	6.2627	3.78e-10	#ERROR!
BTN2A2	THAP9-AS1	0.311334	0	0.747283	0	6.26213	3.8e-10	#ERROR!
NIF3L1	THAP9-AS1	0.480136	0	0.823599	0	6.26203	3.8e-10	#ERROR!
CSPP1	THAP9-AS1	0.429602	0	0.801973	0	6.26171	3.81e-10	#ERROR!
CXorf38	THAP9-AS1	0.404725	0	0.790946	0	6.2613	3.82e-10	#ERROR!
HOXA2	THAP9-AS1	0.12319	4.12e-05	0.646047	1.11e-14	6.26128	3.82e-10	#ERROR!
GPRIN3	THAP9-AS1	0.158775	1.17e-07	0.666692	8.88e-16	6.261	3.83e-10	#ERROR!
MSH6	THAP9-AS1	0.407709	0	0.79225	0	6.26051	3.84e-10	#ERROR!
ARV1	THAP9-AS1	0.309369	0	0.746237	0	6.26028	3.84e-10	#ERROR!
C11orf58	THAP9-AS1	0.457491	0	0.813944	0	6.25941	3.86e-10	#ERROR!
MAX	THAP9-AS1	0.332961	0	0.757558	0	6.25778	3.91e-10	#ERROR!
LOC440173	THAP9-AS1	0.06645	0.027395	0.611169	6.51e-13	6.25712	3.92e-10	#ERROR!
MTPAP	THAP9-AS1	0.536303	0	0.846341	0	6.25639	3.94e-10	#ERROR!
ERMP1	THAP9-AS1	0.249563	0	0.715855	0	6.25623	3.94e-10	#ERROR!
KDM1B	THAP9-AS1	0.358481	0	0.769569	0	6.25607	3.95e-10	#ERROR!
METTL17	THAP9-AS1	0.434604	0	0.803893	0	6.25446	3.99e-10	#ERROR!
FUT8	THAP9-AS1	0.136354	5.56e-06	0.653344	4.44e-15	6.25387	4e-10	#ERROR!
AGBL3	THAP9-AS1	0.35436	0	0.767511	0	6.25309	4.02e-10	#ERROR!
RYK	THAP9-AS1	0.446742	0	0.809065	0	6.25185	4.06e-10	#ERROR!
KDM2A	THAP9-AS1	0.448881	0	0.809918	0	6.2499	4.11e-10	#ERROR!
NUDCD1	THAP9-AS1	0.394082	0	0.785681	0	6.24919	4.13e-10	#ERROR!
PCOLCE-AS1	THAP9-AS1	0.170897	1.14e-08	0.672798	4.44e-16	6.24751	4.17e-10	#ERROR!
CBX5	THAP9-AS1	0.424044	0	0.798969	0	6.24648	4.2e-10	#ERROR!
CERKL	THAP9-AS1	0.137734	4.45e-06	0.653633	4.22e-15	6.24512	4.23e-10	#ERROR!
LRRCC1	THAP9-AS1	0.448646	0	0.809619	0	6.24433	4.26e-10	#ERROR!
ALG10B	THAP9-AS1	0.390556	0	0.783885	0	6.24427	4.26e-10	#ERROR!
PIGG	THAP9-AS1	0.434573	0	0.803492	0	6.24384	4.27e-10	#ERROR!
ABHD17B	THAP9-AS1	0.402242	0	0.789144	0	6.24354	4.28e-10	#ERROR!
OSGEPL1	THAP9-AS1	0.450872	0	0.810542	0	6.2433	4.28e-10	#ERROR!
ACVR1B	THAP9-AS1	0.35545	0	0.767609	0	6.24328	4.28e-10	#ERROR!
SMIM14	THAP9-AS1	0.254178	0	0.717594	0	6.24308	4.29e-10	#ERROR!
TRAPPC11	THAP9-AS1	0.474035	0	0.820346	0	6.24134	4.34e-10	#ERROR!
KIF13B	THAP9-AS1	0.070933	0.018522	0.612953	5.35e-13	6.24109	4.35e-10	#ERROR!
SLC16A9	THAP9-AS1	0.122795	4.37e-05	0.644416	1.33e-14	6.23803	4.43e-10	#ERROR!
ECD	THAP9-AS1	0.407752	0	0.791356	0	6.23673	4.47e-10	#ERROR!
RCOR3	THAP9-AS1	0.396204	0	0.78613	0	6.23617	4.48e-10	#ERROR!
CATSPERE	THAP9-AS1	0.343236	0	0.761508	0	6.23578	4.5e-10	#ERROR!
NKX3-1	THAP9-AS1	0.107334	0.000358	0.634645	4.44e-14	6.22963	4.68e-10	#ERROR!
HAUS6	THAP9-AS1	0.49144	0	0.827233	0	6.22907	4.69e-10	#ERROR!
ATXN10	THAP9-AS1	0.326664	0	0.753254	0	6.22903	4.69e-10	#ERROR!
FAM122C	THAP9-AS1	0.363575	0	0.77077	0	6.22784	4.73e-10	#ERROR!
FNBP1L	THAP9-AS1	0.378748	0	0.77775	0	6.22621	4.78e-10	#ERROR!
S100PBP	THAP9-AS1	0.512413	0	0.835784	0	6.22594	4.79e-10	#ERROR!
TSPAN6	THAP9-AS1	0.266009	0	0.722791	0	6.22473	4.82e-10	#ERROR!
EXTL3-AS1	THAP9-AS1	0.273562	0	0.726611	0	6.22375	4.85e-10	#ERROR!
PLCB4	THAP9-AS1	0.262333	0	0.720847	0	6.22369	4.86e-10	#ERROR!
LOC100996419	THAP9-AS1	0.295318	0	0.737572	0	6.22327	4.87e-10	#ERROR!
PHF6	THAP9-AS1	0.449452	0	0.809204	0	6.22283	4.88e-10	#ERROR!
NIPAL3	THAP9-AS1	0.318978	0	0.749215	0	6.22232	4.9e-10	#ERROR!
CYP4V2	THAP9-AS1	0.251015	0	0.714898	0	6.22213	4.9e-10	#ERROR!
NFE2L3	THAP9-AS1	0.266722	0	0.722983	0	6.22117	4.93e-10	#ERROR!
CETN3	THAP9-AS1	0.3949	0	0.784912	0	6.22031	4.96e-10	#ERROR!
EEF1AKMT3	THAP9-AS1	0.389847	0	0.782585	0	6.21972	4.98e-10	#ERROR!
SLFN12	THAP9-AS1	0.205184	6.12e-12	0.690294	0	6.21964	4.98e-10	#ERROR!
CLEC2D	THAP9-AS1	0.385435	0	0.780532	0	6.21891	5.01e-10	#ERROR!
SORBS2	THAP9-AS1	0.206804	4.14e-12	0.691102	0	6.21821	5.03e-10	#ERROR!
TAF9B	THAP9-AS1	0.323395	0	0.751154	0	6.21757	5.05e-10	#ERROR!
PRKCI	THAP9-AS1	0.421179	0	0.796596	0	6.21696	5.07e-10	#ERROR!
SARM1	THAP9-AS1	0.148482	7.39e-07	0.658208	2.22e-15	6.21652	5.08e-10	#ERROR!
LRRC37B	THAP9-AS1	0.450018	0	0.809212	0	6.21616	5.09e-10	#ERROR!
KIAA2012-AS1	THAP9-AS1	0.086728	0.003961	0.621189	2.12e-13	6.2159	5.1e-10	#ERROR!
MIB1	THAP9-AS1	0.380194	0	0.777992	0	6.21576	5.11e-10	#ERROR!
SLC24A1	THAP9-AS1	0.352733	0	0.765118	0	6.21483	5.14e-10	#ERROR!
TTC23L	THAP9-AS1	0.232691	5.11e-15	0.704784	0	6.21316	5.19e-10	#ERROR!
EIF2AK3-DT	THAP9-AS1	0.376914	0	0.776365	0	6.21303	5.2e-10	#ERROR!
ESYT3	THAP9-AS1	0.183875	7.77e-10	0.678121	0	6.21245	5.22e-10	#ERROR!
LINC01266	THAP9-AS1	0.123614	3.88e-05	0.643239	1.55e-14	6.21044	5.28e-10	#ERROR!
LCA5	THAP9-AS1	0.291935	0	0.735187	0	6.20863	5.34e-10	#ERROR!
SCAF4	THAP9-AS1	0.468085	0	0.816665	0	6.20729	5.39e-10	#ERROR!
CBX3P2	THAP9-AS1	0.332383	0	0.755042	0	6.20699	5.4e-10	#ERROR!
C8orf88	THAP9-AS1	0.148317	7.6e-07	0.657521	2.66e-15	6.20641	5.42e-10	#ERROR!
RBM25	THAP9-AS1	0.555797	0	0.852611	0	6.20536	5.46e-10	#ERROR!
PEX12	THAP9-AS1	0.2892	0	0.733585	0	6.20387	5.51e-10	#ERROR!
SLC25A21	THAP9-AS1	0.109823	0.00026	0.634556	4.49e-14	6.20371	5.51e-10	#ERROR!
FBXL13	THAP9-AS1	0.341172	0	0.75912	0	6.2035	5.52e-10	#ERROR!
LOC441666	THAP9-AS1	0.255322	0	0.71619	0	6.20315	5.53e-10	#ERROR!
CASP2	THAP9-AS1	0.486845	0	0.824434	0	6.20225	5.57e-10	#ERROR!
MXD1	THAP9-AS1	0.326264	0	0.751816	0	6.20118	5.6e-10	#ERROR!
RBM4B	THAP9-AS1	0.435183	0	0.802177	0	6.2006	5.62e-10	#ERROR!
SV2C	THAP9-AS1	0.116156	0.000111	0.638148	2.91e-14	6.20006	5.64e-10	#ERROR!
NR6A1	THAP9-AS1	0.284208	0	0.730879	0	6.20003	5.65e-10	#ERROR!
TTC41P	THAP9-AS1	0.308703	0	0.743146	0	6.20003	5.65e-10	#ERROR!
EXOC2	THAP9-AS1	0.356994	0	0.766477	0	6.19941	5.67e-10	#ERROR!
SPIN1	THAP9-AS1	0.507588	0	0.83297	0	6.1993	5.67e-10	#ERROR!
SLC4A7	THAP9-AS1	0.226404	2.82e-14	0.700622	0	6.19777	5.73e-10	#ERROR!
PIGK	THAP9-AS1	0.310217	0	0.743789	0	6.19773	5.73e-10	#ERROR!
NUCKS1	THAP9-AS1	0.417847	0	0.794382	0	6.19768	5.73e-10	#ERROR!
PITPNA	THAP9-AS1	0.313462	0	0.745376	0	6.1974	5.74e-10	#ERROR!
PDE5A	THAP9-AS1	0.272427	0	0.724726	0	6.19698	5.76e-10	#ERROR!
TLE4	THAP9-AS1	0.2139	7.19e-13	0.693808	0	6.1966	5.77e-10	#ERROR!
SMIM8	THAP9-AS1	0.402488	0	0.787416	0	6.19636	5.78e-10	#ERROR!
PDE1C	THAP9-AS1	0.168346	1.88e-08	0.668356	4.44e-16	6.19463	5.84e-10	#ERROR!
EIF2S3	THAP9-AS1	0.333108	0	0.754833	0	6.19436	5.85e-10	#ERROR!
ERI2	THAP9-AS1	0.365643	0	0.77033	0	6.19417	5.86e-10	#ERROR!
STK17A	THAP9-AS1	0.234125	3.55e-15	0.704535	0	6.19364	5.88e-10	#ERROR!
MACO1	THAP9-AS1	0.375295	0	0.774807	0	6.19337	5.89e-10	#ERROR!
MTO1	THAP9-AS1	0.46557	0	0.815081	0	6.19251	5.92e-10	#ERROR!
FAM168A	THAP9-AS1	0.341872	0	0.758967	0	6.19229	5.93e-10	#ERROR!
PAXBP1	THAP9-AS1	0.581644	0	0.862364	0	6.19219	5.93e-10	#ERROR!
EDRF1-DT	THAP9-AS1	0.240771	4.44e-16	0.707989	0	6.19216	5.93e-10	#ERROR!
LRRC37A3	THAP9-AS1	0.239624	8.88e-16	0.707249	0	6.18957	6.03e-10	#ERROR!
SPCS3	THAP9-AS1	0.367965	0	0.771222	0	6.18945	6.04e-10	#ERROR!
CCDC30	THAP9-AS1	0.34178	0	0.758702	0	6.18724	6.12e-10	#ERROR!
DCLRE1C	THAP9-AS1	0.513067	0	0.834836	0	6.18685	6.14e-10	#ERROR!
TRA2A	THAP9-AS1	0.542564	0	0.846791	0	6.18603	6.17e-10	#ERROR!
DIDO1	THAP9-AS1	0.454381	0	0.810024	0	6.18579	6.18e-10	#ERROR!
EYA3	THAP9-AS1	0.463754	0	0.813962	0	6.18269	6.3e-10	#ERROR!
NUP37	THAP9-AS1	0.421705	0	0.795518	0	6.18217	6.32e-10	#ERROR!
ICE1	THAP9-AS1	0.428844	0	0.79869	0	6.18201	6.33e-10	#ERROR!
MYLK	THAP9-AS1	0.154562	2.52e-07	0.659716	1.78e-15	6.18198	6.33e-10	#ERROR!
BAZ2B	THAP9-AS1	0.385055	0	0.778859	0	6.18179	6.34e-10	#ERROR!
SUSD6	THAP9-AS1	0.229233	1.33e-14	0.701246	0	6.18069	6.38e-10	#ERROR!
CARNMT1	THAP9-AS1	0.446075	0	0.806228	0	6.18068	6.38e-10	#ERROR!
JADE2	THAP9-AS1	0.238213	1.11e-15	0.705999	0	6.17987	6.42e-10	#ERROR!
RBM5	THAP9-AS1	0.461356	0	0.812825	0	6.1797	6.42e-10	#ERROR!
PCNX2	THAP9-AS1	0.346185	0	0.760471	0	6.17934	6.44e-10	#ERROR!
PCDHGA6	THAP9-AS1	0.24223	4.44e-16	0.708097	0	6.17921	6.44e-10	#ERROR!
TAF2	THAP9-AS1	0.418425	0	0.793932	0	6.17904	6.45e-10	#ERROR!
PELI1	THAP9-AS1	0.320104	0	0.747788	0	6.17863	6.47e-10	#ERROR!
SMC2	THAP9-AS1	0.398234	0	0.784782	0	6.1786	6.47e-10	#ERROR!
CHD8	THAP9-AS1	0.367053	0	0.770328	0	6.17828	6.48e-10	#ERROR!
BHLHE40-AS1	THAP9-AS1	0.304469	0	0.740035	0	6.17827	6.48e-10	#ERROR!
SLC35F5	THAP9-AS1	0.284746	0	0.730038	0	6.17682	6.54e-10	#ERROR!
SFMBT2	THAP9-AS1	0.283498	0	0.729393	0	6.1766	6.55e-10	#ERROR!
KANSL1	THAP9-AS1	0.447881	0	0.806865	0	6.17648	6.55e-10	#ERROR!
CPLANE1	THAP9-AS1	0.322727	0	0.748964	0	6.17617	6.57e-10	#ERROR!
ADO	THAP9-AS1	0.4506	0	0.808036	0	6.17607	6.57e-10	#ERROR!
MACC1	THAP9-AS1	0.158175	1.31e-07	0.6614	1.55e-15	6.17503	6.62e-10	#ERROR!
TNIK	THAP9-AS1	0.084718	0.00489	0.617185	3.34e-13	6.17249	6.72e-10	#ERROR!
LY75	THAP9-AS1	0.240536	4.44e-16	0.706797	0	6.17139	6.77e-10	#ERROR!
BLOC1S5	THAP9-AS1	0.449743	0	0.80748	0	6.17097	6.79e-10	#ERROR!
EXD2	THAP9-AS1	0.330357	0	0.752456	0	6.17095	6.79e-10	#ERROR!
LSINCT5	THAP9-AS1	0.122996	4.24e-05	0.640463	2.18e-14	6.17068	6.8e-10	#ERROR!
PPP4R2	THAP9-AS1	0.439592	0	0.802974	0	6.16939	6.86e-10	#ERROR!
PRSS16	THAP9-AS1	0.168372	1.87e-08	0.666894	8.88e-16	6.16875	6.88e-10	#ERROR!
FAM216A	THAP9-AS1	0.389385	0	0.780316	0	6.16842	6.9e-10	#ERROR!
TVP23C	THAP9-AS1	0.289697	0	0.732142	0	6.16831	6.9e-10	#ERROR!
PRPF38A	THAP9-AS1	0.507168	0	0.83181	0	6.16811	6.91e-10	#ERROR!
PLRG1	THAP9-AS1	0.536686	0	0.843896	0	6.16807	6.91e-10	#ERROR!
LMO7-AS1	THAP9-AS1	0.081039	0.007111	0.614572	4.47e-13	6.16758	6.93e-10	#ERROR!
BTBD7	THAP9-AS1	0.361979	0	0.767439	0	6.16651	6.98e-10	#ERROR!
KLHDC1	THAP9-AS1	0.308047	0	0.74127	0	6.16649	6.98e-10	#ERROR!
NIPBL	THAP9-AS1	0.403832	0	0.786846	0	6.16622	6.99e-10	#ERROR!
CCDC65	THAP9-AS1	0.253142	0	0.713184	0	6.16611	7e-10	#ERROR!
ARHGEF28	THAP9-AS1	0.264058	0	0.718879	0	6.166	7e-10	#ERROR!
CCDC148	THAP9-AS1	0.232338	5.77e-15	0.702038	0	6.164	7.09e-10	#ERROR!
PCGF3	THAP9-AS1	0.521782	0	0.837698	0	6.16372	7.11e-10	#ERROR!
HSPA14	THAP9-AS1	0.481103	0	0.820692	0	6.16269	7.15e-10	#ERROR!
CIPC	THAP9-AS1	0.341601	0	0.757539	0	6.16266	7.15e-10	#ERROR!
FBXO28	THAP9-AS1	0.389985	0	0.78036	0	6.16264	7.15e-10	#ERROR!
TBPL1	THAP9-AS1	0.401879	0	0.785814	0	6.1626	7.16e-10	#ERROR!
RBM43	THAP9-AS1	0.326944	0	0.750402	0	6.16228	7.17e-10	#ERROR!
SOCS5	THAP9-AS1	0.402122	0	0.785875	0	6.16132	7.21e-10	#ERROR!
PKP4	THAP9-AS1	0.421687	0	0.794625	0	6.1588	7.33e-10	#ERROR!
DNMBP	THAP9-AS1	0.213953	7.09e-13	0.691761	0	6.15785	7.37e-10	#ERROR!
KDM4D	THAP9-AS1	0.308929	0	0.741262	0	6.15686	7.42e-10	#ERROR!
NCKAP5	THAP9-AS1	0.204723	6.83e-12	0.686608	0	6.15626	7.45e-10	#ERROR!
ARHGEF38	THAP9-AS1	0.134605	7.33e-06	0.646462	1.04e-14	6.15547	7.49e-10	#ERROR!
EIF1AD	THAP9-AS1	0.420306	0	0.793858	0	6.15494	7.51e-10	#ERROR!
CYP39A1	THAP9-AS1	0.156268	1.85e-07	0.659107	2.22e-15	6.15453	7.53e-10	#ERROR!
TAF5L	THAP9-AS1	0.411609	0	0.789866	0	6.15312	7.6e-10	#ERROR!
SBNO1	THAP9-AS1	0.416612	0	0.792111	0	6.15272	7.62e-10	#ERROR!
SRGAP3	THAP9-AS1	0.219941	1.54e-13	0.694731	0	6.15235	7.63e-10	#ERROR!
MEAF6	THAP9-AS1	0.385054	0	0.777635	0	6.15168	7.67e-10	#ERROR!
ARMCX4	THAP9-AS1	0.175223	4.75e-09	0.669769	4.44e-16	6.15065	7.72e-10	#ERROR!
SASS6	THAP9-AS1	0.487239	0	0.822887	0	6.15053	7.72e-10	#ERROR!
OSBP2	THAP9-AS1	0.108184	0.000321	0.630216	7.48e-14	6.14959	7.77e-10	#ERROR!
LINC00987	THAP9-AS1	0.246763	0	0.708945	0	6.14892	7.8e-10	#ERROR!
DNAJC18	THAP9-AS1	0.325043	0	0.748811	0	6.14766	7.86e-10	#ERROR!
BPTF	THAP9-AS1	0.36281	0	0.766959	0	6.14586	7.95e-10	#ERROR!
TMEM200A	THAP9-AS1	0.169755	1.43e-08	0.66629	8.88e-16	6.14436	8.03e-10	#ERROR!
MTBP	THAP9-AS1	0.466448	0	0.813784	0	6.14419	8.04e-10	#ERROR!
NT5DC1	THAP9-AS1	0.32234	0	0.74728	0	6.14322	8.09e-10	#ERROR!
ASAH2B	THAP9-AS1	0.363103	0	0.766967	0	6.1428	8.11e-10	#ERROR!
SLC2A11	THAP9-AS1	0.270598	0	0.721094	0	6.14227	8.13e-10	#ERROR!
EMSY	THAP9-AS1	0.393715	0	0.781066	0	6.13741	8.39e-10	#ERROR!
LRIG2	THAP9-AS1	0.513511	0	0.833435	0	6.13627	8.45e-10	#ERROR!
TOPORS	THAP9-AS1	0.481218	0	0.819775	0	6.13404	8.57e-10	#ERROR!
CCDC110	THAP9-AS1	0.273976	0	0.722384	0	6.13299	8.62e-10	#ERROR!
TRIT1	THAP9-AS1	0.470361	0	0.815035	0	6.13161	8.7e-10	#ERROR!
LINC00323	THAP9-AS1	0.200693	1.78e-11	0.682977	0	6.13067	8.75e-10	#ERROR!
TTLL5	THAP9-AS1	0.393073	0	0.780385	0	6.12784	8.91e-10	#ERROR!
NAF1	THAP9-AS1	0.442674	0	0.802801	0	6.12751	8.93e-10	#ERROR!
TMEM107	THAP9-AS1	0.209789	2e-12	0.687776	0	6.12634	8.99e-10	#ERROR!
MDC1	THAP9-AS1	0.445668	0	0.804036	0	6.12509	9.06e-10	#ERROR!
C8orf37	THAP9-AS1	0.343757	0	0.756915	0	6.12474	9.08e-10	#ERROR!
NEPRO	THAP9-AS1	0.514637	0	0.833536	0	6.12462	9.09e-10	#ERROR!
DGKE	THAP9-AS1	0.348024	0	0.75892	0	6.12342	9.16e-10	#ERROR!
PCDHGA7	THAP9-AS1	0.173904	6.22e-09	0.667453	6.66e-16	6.12319	9.17e-10	#ERROR!
GFM2	THAP9-AS1	0.340519	0	0.755275	0	6.12315	9.17e-10	#ERROR!
TMEM209	THAP9-AS1	0.481522	0	0.819506	0	6.12221	9.23e-10	#ERROR!
KBTBD6	THAP9-AS1	0.39028	0	0.778788	0	6.12034	9.34e-10	#ERROR!
IQUB	THAP9-AS1	0.126946	2.37e-05	0.639755	2.4e-14	6.12006	9.35e-10	#ERROR!
SNRPA1	THAP9-AS1	0.410892	0	0.78823	0	6.11939	9.39e-10	#ERROR!
MCCC2	THAP9-AS1	0.154152	2.71e-07	0.655803	3.11e-15	6.11907	9.41e-10	#ERROR!
CACNB4	THAP9-AS1	0.195799	5.53e-11	0.679584	0	6.11865	9.44e-10	#ERROR!
PSEN1	THAP9-AS1	0.304856	0	0.737433	0	6.1185	9.45e-10	#ERROR!
MAP3K4	THAP9-AS1	0.424267	0	0.794234	0	6.11801	9.47e-10	#ERROR!
MTMR1	THAP9-AS1	0.462522	0	0.811114	0	6.11653	9.56e-10	#ERROR!
GTF2A1	THAP9-AS1	0.358893	0	0.763816	0	6.1159	9.6e-10	#ERROR!
MON1B	THAP9-AS1	0.357025	0	0.762807	0	6.11324	9.76e-10	#ERROR!
TMTC3	THAP9-AS1	0.310681	0	0.740068	0	6.11235	9.82e-10	#ERROR!
LRRK1	THAP9-AS1	0.158881	1.15e-07	0.658152	2.22e-15	6.11212	9.83e-10	#ERROR!
PARD6G	THAP9-AS1	0.313299	0	0.741363	0	6.11205	9.84e-10	#ERROR!
IRX2	THAP9-AS1	0.097199	0.001235	0.621088	2.15e-13	6.11174	9.86e-10	#ERROR!
MMS22L	THAP9-AS1	0.404661	0	0.784995	0	6.10956	9.99e-10	#ERROR!
TMEM30B	THAP9-AS1	0.221778	9.55e-14	0.693422	0	6.10906	1e-09	#ERROR!
LOC101927468	THAP9-AS1	0.137314	4.77e-06	0.645264	1.2e-14	6.1087	1e-09	#ERROR!
PDCD10	THAP9-AS1	0.369495	0	0.768548	0	6.10849	1.01e-09	#ERROR!
ORMDL1	THAP9-AS1	0.538882	0	0.842996	0	6.10776	1.01e-09	#ERROR!
CDK19	THAP9-AS1	0.392369	0	0.779188	0	6.10626	1.02e-09	#ERROR!
SLC9A7	THAP9-AS1	0.243563	2.22e-16	0.705021	0	6.10579	1.02e-09	#ERROR!
IST1	THAP9-AS1	0.388173	0	0.777208	0	6.10557	1.02e-09	#ERROR!
TMA16	THAP9-AS1	0.508432	0	0.830282	0	6.10359	1.04e-09	#ERROR!
TTC23	THAP9-AS1	0.234982	2.66e-15	0.70017	0	6.10115	1.05e-09	#ERROR!
CYFIP2	THAP9-AS1	0.113697	0.000155	0.630549	7.19e-14	6.10074	1.06e-09	#ERROR!
BDP1	THAP9-AS1	0.36982	0	0.768317	0	6.09935	1.07e-09	#ERROR!
GPR156	THAP9-AS1	0.182762	9.86e-10	0.671125	4.44e-16	6.09893	1.07e-09	#ERROR!
PTER	THAP9-AS1	0.353688	0	0.760576	0	6.0987	1.07e-09	#ERROR!
ICA1	THAP9-AS1	0.248164	0	0.707022	0	6.09699	1.08e-09	#ERROR!
SEC14L1P1	THAP9-AS1	0.262688	0	0.714701	0	6.09685	1.08e-09	#ERROR!
PUM2	THAP9-AS1	0.509927	0	0.830683	0	6.09654	1.08e-09	#ERROR!
CWC22	THAP9-AS1	0.529538	0	0.8388	0	6.09563	1.09e-09	#ERROR!
TCEAL1	THAP9-AS1	0.134248	7.76e-06	0.642616	1.69e-14	6.09508	1.09e-09	#ERROR!
IBTK	THAP9-AS1	0.335138	0	0.751277	0	6.09239	1.11e-09	#ERROR!
SEC24C	THAP9-AS1	0.280783	0	0.723871	0	6.09165	1.12e-09	#ERROR!
NDRG3	THAP9-AS1	0.360146	0	0.763341	0	6.09087	1.12e-09	#ERROR!
MROCKI	THAP9-AS1	0.208199	2.95e-12	0.684948	0	6.09058	1.13e-09	#ERROR!
REEP5	THAP9-AS1	0.215051	5.38e-13	0.68866	0	6.08915	1.14e-09	#ERROR!
MXI1	THAP9-AS1	0.358249	0	0.762343	0	6.08885	1.14e-09	#ERROR!
DONSON	THAP9-AS1	0.402887	0	0.783335	0	6.08828	1.14e-09	#ERROR!
PSMG4	THAP9-AS1	0.314352	0	0.740775	0	6.08803	1.14e-09	#ERROR!
DHX33	THAP9-AS1	0.4737	0	0.814949	0	6.08739	1.15e-09	#ERROR!
NUTM2D	THAP9-AS1	0.252318	0	0.70874	0	6.08738	1.15e-09	#ERROR!
ETV1	THAP9-AS1	0.141133	2.56e-06	0.646221	1.07e-14	6.08681	1.15e-09	#ERROR!
PEX11B	THAP9-AS1	0.379872	0	0.77253	0	6.08643	1.15e-09	#ERROR!
MYBL1	THAP9-AS1	0.331706	0	0.749314	0	6.08625	1.16e-09	#ERROR!
RASA2	THAP9-AS1	0.489834	0	0.821833	0	6.08579	1.16e-09	#ERROR!
DENND4A	THAP9-AS1	0.359251	0	0.762582	0	6.08321	1.18e-09	#ERROR!
PTGES3	THAP9-AS1	0.439493	0	0.799686	0	6.08133	1.19e-09	#ERROR!
PRDM5	THAP9-AS1	0.239534	8.88e-16	0.701539	0	6.08044	1.2e-09	#ERROR!
CTNNB1	THAP9-AS1	0.332494	0	0.749385	0	6.07923	1.21e-09	#ERROR!
STAG2	THAP9-AS1	0.431855	0	0.796152	0	6.07845	1.21e-09	#ERROR!
SLC38A9	THAP9-AS1	0.357062	0	0.761321	0	6.0784	1.21e-09	#ERROR!
CEP128	THAP9-AS1	0.317039	0	0.741665	0	6.07822	1.22e-09	#ERROR!
ATP2C1	THAP9-AS1	0.374787	0	0.769775	0	6.078	1.22e-09	#ERROR!
HACE1	THAP9-AS1	0.456458	0	0.807048	0	6.07685	1.23e-09	#ERROR!
RNF145	THAP9-AS1	0.222075	8.84e-14	0.691812	0	6.07597	1.23e-09	#ERROR!
ARL4C	THAP9-AS1	0.15108	4.69e-07	0.651445	5.55e-15	6.07571	1.23e-09	#ERROR!
METTL6	THAP9-AS1	0.431711	0	0.795977	0	6.07552	1.24e-09	#ERROR!
BIRC2	THAP9-AS1	0.429516	0	0.794961	0	6.07483	1.24e-09	#ERROR!
SON	THAP9-AS1	0.415779	0	0.788672	0	6.07349	1.25e-09	#ERROR!
LINC01138	THAP9-AS1	0.228455	1.64e-14	0.695131	0	6.07279	1.26e-09	#ERROR!
LOC101930275	THAP9-AS1	0.157486	1.48e-07	0.655012	3.55e-15	6.07242	1.26e-09	#ERROR!
LRP2BP	THAP9-AS1	0.386699	0	0.775113	0	6.07124	1.27e-09	#ERROR!
PCDHB10	THAP9-AS1	0.212333	1.06e-12	0.686185	0	6.07123	1.27e-09	#ERROR!
TFB2M	THAP9-AS1	0.414671	0	0.787952	0	6.06802	1.29e-09	#ERROR!
TASOR2	THAP9-AS1	0.382257	0	0.772887	0	6.06794	1.3e-09	#ERROR!
PIAS3	THAP9-AS1	0.372285	0	0.768124	0	6.067	1.3e-09	#ERROR!
NCOA2	THAP9-AS1	0.34732	0	0.756075	0	6.06635	1.31e-09	#ERROR!
RAB11A	THAP9-AS1	0.352936	0	0.758727	0	6.0646	1.32e-09	#ERROR!
MYNN	THAP9-AS1	0.49705	0	0.8242	0	6.06441	1.32e-09	#ERROR!
GGA2	THAP9-AS1	0.406653	0	0.784086	0	6.06346	1.33e-09	#ERROR!
TRMO	THAP9-AS1	0.428673	0	0.793942	0	6.05802	1.38e-09	#ERROR!
RFXAP	THAP9-AS1	0.415969	0	0.788116	0	6.057	1.39e-09	#ERROR!
ITPR2	THAP9-AS1	0.214943	5.53e-13	0.686818	0	6.0563	1.39e-09	#ERROR!
PPP2R5E	THAP9-AS1	0.354839	0	0.759266	0	6.05582	1.4e-09	#ERROR!
CARF	THAP9-AS1	0.448187	0	0.802608	0	6.05542	1.4e-09	#ERROR!
TMEM131	THAP9-AS1	0.368109	0	0.765622	0	6.05502	1.4e-09	#ERROR!
NCALD	THAP9-AS1	0.094895	0.001612	0.61601	3.81e-13	6.05444	1.41e-09	#ERROR!
MIR100HG	THAP9-AS1	0.157687	1.43e-07	0.654049	4e-15	6.05405	1.41e-09	#ERROR!
DNAJC6	THAP9-AS1	0.220335	1.39e-13	0.689669	0	6.05393	1.41e-09	#ERROR!
KMT2E	THAP9-AS1	0.427343	0	0.793152	0	6.05312	1.42e-09	#ERROR!
CCNK	THAP9-AS1	0.330469	0	0.74716	0	6.05223	1.43e-09	#ERROR!
CEP44	THAP9-AS1	0.595053	0	0.863898	0	6.05143	1.44e-09	#ERROR!
TMX1	THAP9-AS1	0.317187	0	0.740487	0	6.05126	1.44e-09	#ERROR!
RSPH4A	THAP9-AS1	0.214065	6.89e-13	0.686037	0	6.05089	1.44e-09	#ERROR!
FAM222B	THAP9-AS1	0.368086	0	0.765399	0	6.05003	1.45e-09	#ERROR!
TCEAL7	THAP9-AS1	0.111214	0.000216	0.625859	1.24e-13	6.04992	1.45e-09	#ERROR!
ITFG1	THAP9-AS1	0.245137	0	0.702821	0	6.04718	1.47e-09	#ERROR!
DHX9	THAP9-AS1	0.458767	0	0.806995	0	6.047	1.48e-09	#ERROR!
CCDC15	THAP9-AS1	0.295622	0	0.729301	0	6.04617	1.48e-09	#ERROR!
CMAHP	THAP9-AS1	0.187406	3.62e-10	0.670681	4.44e-16	6.04438	1.5e-09	#ERROR!
RHBDD1	THAP9-AS1	0.425405	0	0.791877	0	6.04281	1.51e-09	#ERROR!
MITD1	THAP9-AS1	0.550894	0	0.845856	0	6.03863	1.55e-09	#ERROR!
MRPL50	THAP9-AS1	0.455097	0	0.805064	0	6.03851	1.56e-09	#ERROR!
CD3G	THAP9-AS1	0.144262	1.52e-06	0.645168	1.24e-14	6.03825	1.56e-09	#ERROR!
PYGO1	THAP9-AS1	0.143683	1.67e-06	0.644712	1.29e-14	6.03641	1.58e-09	#ERROR!
PERP	THAP9-AS1	0.19418	7.99e-11	0.674076	2.22e-16	6.03629	1.58e-09	#ERROR!
ATG5	THAP9-AS1	0.404659	0	0.782037	0	6.03519	1.59e-09	#ERROR!
SPIN4	THAP9-AS1	0.426968	0	0.792264	0	6.03436	1.6e-09	#ERROR!
ENPP5	THAP9-AS1	0.12452	3.4e-05	0.633029	5.37e-14	6.0342	1.6e-09	#ERROR!
TASOR	THAP9-AS1	0.412178	0	0.785461	0	6.03375	1.6e-09	#ERROR!
SPG11	THAP9-AS1	0.318296	0	0.740217	0	6.03346	1.6e-09	#ERROR!
MSL1	THAP9-AS1	0.39847	0	0.779027	0	6.03204	1.62e-09	#ERROR!
HHAT	THAP9-AS1	0.21523	5.14e-13	0.685614	0	6.03127	1.63e-09	#ERROR!
RNF24	THAP9-AS1	0.31765	0	0.739714	0	6.02964	1.64e-09	#ERROR!
PTGR2	THAP9-AS1	0.240686	4.44e-16	0.699486	0	6.0294	1.65e-09	#ERROR!
NUFIP2	THAP9-AS1	0.388157	0	0.774042	0	6.02857	1.65e-09	#ERROR!
TM9SF3	THAP9-AS1	0.383417	0	0.771792	0	6.02837	1.66e-09	#ERROR!
TMED2	THAP9-AS1	0.343909	0	0.752689	0	6.02765	1.66e-09	#ERROR!
ARL1	THAP9-AS1	0.340984	0	0.751148	0	6.0254	1.69e-09	#ERROR!
SRPK1	THAP9-AS1	0.389721	0	0.774612	0	6.0245	1.7e-09	#ERROR!
LOC100268168	THAP9-AS1	0.238457	8.88e-16	0.697986	0	6.02391	1.7e-09	#ERROR!
CHD9	THAP9-AS1	0.326493	0	0.743785	0	6.02172	1.73e-09	#ERROR!
HSF2	THAP9-AS1	0.434908	0	0.795388	0	6.02169	1.73e-09	#ERROR!
PCDHB14	THAP9-AS1	0.190641	1.77e-10	0.671231	4.44e-16	6.0215	1.73e-09	#ERROR!
TMEM251	THAP9-AS1	0.217665	2.77e-13	0.686353	0	6.02001	1.74e-09	#ERROR!
CRMP1	THAP9-AS1	0.141547	2.39e-06	0.642424	1.73e-14	6.01966	1.75e-09	#ERROR!
PIK3C2G	THAP9-AS1	0.129979	1.5e-05	0.635445	4.02e-14	6.01956	1.75e-09	#ERROR!
PABPC1	THAP9-AS1	0.31318	0	0.736951	0	6.01886	1.76e-09	#ERROR!
NCOR1	THAP9-AS1	0.329708	0	0.745199	0	6.01754	1.77e-09	#ERROR!
NF1	THAP9-AS1	0.351346	0	0.755868	0	6.01713	1.78e-09	#ERROR!
TM4SF18	THAP9-AS1	0.124105	3.61e-05	0.631692	6.28e-14	6.01665	1.78e-09	#ERROR!
CACNA1C	THAP9-AS1	0.108359	0.000314	0.621998	1.94e-13	6.0166	1.78e-09	#ERROR!
POLR1B	THAP9-AS1	0.449221	0	0.801626	0	6.01611	1.79e-09	#ERROR!
ARL6IP6	THAP9-AS1	0.492728	0	0.820727	0	6.01574	1.79e-09	#ERROR!
PLCZ1	THAP9-AS1	0.16791	2.05e-08	0.65772	2.44e-15	6.01464	1.8e-09	#ERROR!
SRRD	THAP9-AS1	0.337637	0	0.749	0	6.01444	1.81e-09	#ERROR!
FRK	THAP9-AS1	0.164272	4.15e-08	0.655455	3.33e-15	6.01229	1.83e-09	#ERROR!
POU2F1	THAP9-AS1	0.431722	0	0.793555	0	6.01152	1.84e-09	#ERROR!
CENPJ	THAP9-AS1	0.491887	0	0.820208	0	6.01109	1.84e-09	#ERROR!
ITGB6	THAP9-AS1	0.05708	0.058192	0.588883	6.87e-12	6.01019	1.85e-09	0/+
DHX15	THAP9-AS1	0.522563	0	0.833248	0	6.01017	1.85e-09	#ERROR!
RPS6KA5	THAP9-AS1	0.288723	0	0.72394	0	6.00911	1.87e-09	#ERROR!
NUFIP1	THAP9-AS1	0.442106	0	0.79813	0	6.00806	1.88e-09	#ERROR!
DCAF7	THAP9-AS1	0.360874	0	0.760098	0	6.00769	1.88e-09	#ERROR!
MAP7	THAP9-AS1	0.19668	4.52e-11	0.673813	4.44e-16	6.00635	1.9e-09	#ERROR!
RCBTB2	THAP9-AS1	0.234424	3.11e-15	0.694836	0	6.00599	1.9e-09	#ERROR!
RBM7	THAP9-AS1	0.347796	0	0.753619	0	6.00565	1.91e-09	#ERROR!
BICRAL	THAP9-AS1	0.434861	0	0.794735	0	6.00502	1.91e-09	#ERROR!
SEMA5A	THAP9-AS1	0.175468	4.52e-09	0.661502	1.55e-15	6.00401	1.93e-09	#ERROR!
HNRNPR	THAP9-AS1	0.48819	0	0.818356	0	6.00365	1.93e-09	#ERROR!
C4orf46	THAP9-AS1	0.500725	0	0.82372	0	6.00235	1.94e-09	#ERROR!
RPL5P30	THAP9-AS1	0.322476	0	0.740857	0	6.00199	1.95e-09	#ERROR!
NCBP3	THAP9-AS1	0.479503	0	0.814516	0	6.00194	1.95e-09	#ERROR!
ESF1	THAP9-AS1	0.450343	0	0.801606	0	6.00192	1.95e-09	#ERROR!
FSIP2-AS1	THAP9-AS1	0.226305	2.89e-14	0.690077	0	6.00047	1.97e-09	#ERROR!
LINC02872	THAP9-AS1	0.095285	0.001542	0.612751	5.47e-13	5.99977	1.98e-09	#ERROR!
SEPHS1	THAP9-AS1	0.457686	0	0.804754	0	5.99821	1.99e-09	#ERROR!
GPATCH1	THAP9-AS1	0.489178	0	0.818594	0	5.99802	2e-09	#ERROR!
TLCD5	THAP9-AS1	0.278321	0	0.717932	0	5.99746	2e-09	#ERROR!
FGD6	THAP9-AS1	0.25998	0	0.708206	0	5.99734	2.01e-09	#ERROR!
TSHZ3	THAP9-AS1	0.123946	3.69e-05	0.63037	7.35e-14	5.99689	2.01e-09	#ERROR!
CHD6	THAP9-AS1	0.362439	0	0.760368	0	5.99643	2.02e-09	#ERROR!
EXOC6	THAP9-AS1	0.270887	0	0.713952	0	5.99625	2.02e-09	#ERROR!
MAML1	THAP9-AS1	0.431902	0	0.793044	0	5.99598	2.02e-09	#ERROR!
DUOXA1	THAP9-AS1	0.04147	0.168923	0.577547	2.13e-11	5.99531	2.03e-09	0/+
PRDM10	THAP9-AS1	0.464301	0	0.807542	0	5.99397	2.05e-09	#ERROR!
APLF	THAP9-AS1	0.313117	0	0.735743	0	5.99391	2.05e-09	#ERROR!
SUDS3	THAP9-AS1	0.443088	0	0.798022	0	5.99331	2.06e-09	#ERROR!
SLC39A10	THAP9-AS1	0.334174	0	0.746176	0	5.99016	2.1e-09	#ERROR!
SLC44A1	THAP9-AS1	0.343583	0	0.750848	0	5.99012	2.1e-09	#ERROR!
GABPB1	THAP9-AS1	0.520668	0	0.831781	0	5.98902	2.11e-09	#ERROR!
LNX2	THAP9-AS1	0.292177	0	0.724731	0	5.98865	2.12e-09	#ERROR!
CLDN12	THAP9-AS1	0.362966	0	0.76028	0	5.98851	2.12e-09	#ERROR!
INTS13	THAP9-AS1	0.381499	0	0.769196	0	5.98816	2.12e-09	#ERROR!
CAMK4	THAP9-AS1	0.201282	1.55e-11	0.675394	2.22e-16	5.988	2.12e-09	#ERROR!
CRNDE	THAP9-AS1	0.336228	0	0.74708	0	5.98754	2.13e-09	#ERROR!
FCF1	THAP9-AS1	0.367573	0	0.762445	0	5.98691	2.14e-09	#ERROR!
CNOT1	THAP9-AS1	0.315361	0	0.736502	0	5.98582	2.15e-09	#ERROR!
FPGT	THAP9-AS1	0.361674	0	0.759517	0	5.98541	2.16e-09	#ERROR!
ADPRM	THAP9-AS1	0.365718	0	0.761413	0	5.98381	2.18e-09	#ERROR!
RNF149	THAP9-AS1	0.435225	0	0.794067	0	5.98308	2.19e-09	#ERROR!
GOLGA8B	THAP9-AS1	0.323652	0	0.740563	0	5.98293	2.19e-09	#ERROR!
BEX4	THAP9-AS1	0.195828	5.49e-11	0.671966	4.44e-16	5.98218	2.2e-09	#ERROR!
AMMECR1	THAP9-AS1	0.291707	0	0.724167	0	5.9821	2.2e-09	#ERROR!
SBF2-AS1	THAP9-AS1	0.3754	0	0.766003	0	5.98179	2.21e-09	#ERROR!
SMC3	THAP9-AS1	0.42696	0	0.790206	0	5.98101	2.22e-09	#ERROR!
FAM98B	THAP9-AS1	0.403441	0	0.779279	0	5.98073	2.22e-09	#ERROR!
RAB2B	THAP9-AS1	0.466139	0	0.80786	0	5.98007	2.23e-09	#ERROR!
ITPRIPL1	THAP9-AS1	0.164922	3.66e-08	0.653928	4e-15	5.97985	2.23e-09	#ERROR!
KCNA3	THAP9-AS1	0.149928	5.74e-07	0.645038	1.24e-14	5.97982	2.23e-09	#ERROR!
MAP3K21	THAP9-AS1	0.277807	0	0.716742	0	5.97906	2.24e-09	#ERROR!
MINPP1	THAP9-AS1	0.292876	0	0.724607	0	5.97867	2.25e-09	#ERROR!
RAD51D	THAP9-AS1	0.444638	0	0.798172	0	5.97858	2.25e-09	#ERROR!
OTUD3	THAP9-AS1	0.464379	0	0.807021	0	5.97849	2.25e-09	#ERROR!
AKAP10	THAP9-AS1	0.356936	0	0.756843	0	5.97717	2.27e-09	#ERROR!
NT5C3A	THAP9-AS1	0.441487	0	0.796679	0	5.97683	2.28e-09	#ERROR!
PUM1	THAP9-AS1	0.474021	0	0.811224	0	5.9766	2.28e-09	#ERROR!
TRIM34	THAP9-AS1	0.235961	2.22e-15	0.694076	0	5.97595	2.29e-09	#ERROR!
RABGAP1	THAP9-AS1	0.471158	0	0.809914	0	5.97531	2.3e-09	#ERROR!
SEMA6A	THAP9-AS1	0.195809	5.51e-11	0.671557	4.44e-16	5.97513	2.3e-09	#ERROR!
CENPC	THAP9-AS1	0.562358	0	0.848635	0	5.97296	2.33e-09	#ERROR!
CEBPZ	THAP9-AS1	0.478026	0	0.812763	0	5.97019	2.37e-09	#ERROR!
PUS3	THAP9-AS1	0.31833	0	0.73727	0	5.97008	2.37e-09	#ERROR!
NEK10	THAP9-AS1	0.052288	0.082742	0.582984	1.24e-11	5.96962	2.38e-09	0/+
CEP76	THAP9-AS1	0.415664	0	0.784542	0	5.96962	2.38e-09	#ERROR!
TMEM65	THAP9-AS1	0.336464	0	0.746313	0	5.96812	2.4e-09	#ERROR!
ALCAM	THAP9-AS1	0.104801	0.000493	0.616662	3.54e-13	5.96746	2.41e-09	#ERROR!
PLEKHF2	THAP9-AS1	0.313657	0	0.734721	0	5.96648	2.42e-09	#ERROR!
PAPOLG	THAP9-AS1	0.50245	0	0.82327	0	5.96641	2.43e-09	#ERROR!
RASGRP1	THAP9-AS1	0.226457	2.8e-14	0.688284	0	5.96573	2.44e-09	#ERROR!
RFX7	THAP9-AS1	0.342657	0	0.749203	0	5.9638	2.46e-09	#ERROR!
HTR7P1	THAP9-AS1	0.188608	2.78e-10	0.666739	8.88e-16	5.96303	2.48e-09	#ERROR!
SRPK2	THAP9-AS1	0.409944	0	0.781555	0	5.96161	2.5e-09	#ERROR!
ARMCX1	THAP9-AS1	0.208973	2.44e-12	0.678257	0	5.96132	2.5e-09	#ERROR!
CREB1	THAP9-AS1	0.429701	0	0.790637	0	5.95954	2.53e-09	#ERROR!
B3GLCT	THAP9-AS1	0.34466	0	0.750001	0	5.95941	2.53e-09	#ERROR!
TAF7	THAP9-AS1	0.34996	0	0.752608	0	5.95903	2.54e-09	#ERROR!
PAK1	THAP9-AS1	0.27446	0	0.713905	0	5.95783	2.56e-09	#ERROR!
LRRC40	THAP9-AS1	0.460615	0	0.804568	0	5.95705	2.57e-09	#ERROR!
IDS	THAP9-AS1	0.35379	0	0.754384	0	5.95648	2.58e-09	#ERROR!
CYP2E1	THAP9-AS1	0.192011	1.3e-10	0.66821	6.66e-16	5.95449	2.61e-09	#ERROR!
MSI2	THAP9-AS1	0.267313	0	0.709924	0	5.95433	2.61e-09	#ERROR!
OVGP1	THAP9-AS1	0.226344	2.86e-14	0.687586	0	5.95402	2.62e-09	#ERROR!
ARHGAP44	THAP9-AS1	0.190843	1.69e-10	0.667503	6.66e-16	5.95387	2.62e-09	#ERROR!
BAZ1A	THAP9-AS1	0.404132	0	0.778515	0	5.95386	2.62e-09	#ERROR!
CUL3	THAP9-AS1	0.422056	0	0.786867	0	5.95335	2.63e-09	#ERROR!
RLN1	THAP9-AS1	0.140658	2.77e-06	0.637853	3.02e-14	5.95324	2.63e-09	#ERROR!
CASP4	THAP9-AS1	0.191706	1.4e-10	0.667963	6.66e-16	5.95324	2.63e-09	#ERROR!
HERPUD2	THAP9-AS1	0.465002	0	0.80632	0	5.95126	2.66e-09	#ERROR!
BUD13	THAP9-AS1	0.430233	0	0.790555	0	5.95109	2.66e-09	#ERROR!
SHTN1	THAP9-AS1	0.318585	0	0.736495	0	5.95086	2.67e-09	#ERROR!
NPHP1	THAP9-AS1	0.340827	0	0.747697	0	5.95065	2.67e-09	#ERROR!
DCP2	THAP9-AS1	0.433939	0	0.792232	0	5.95041	2.67e-09	#ERROR!
RNF170	THAP9-AS1	0.356952	0	0.755609	0	5.949	2.7e-09	#ERROR!
HENMT1	THAP9-AS1	0.23959	8.88e-16	0.694564	0	5.94773	2.72e-09	#ERROR!
RAD51C	THAP9-AS1	0.283659	0	0.718233	0	5.94721	2.73e-09	#ERROR!
FAM229A	THAP9-AS1	0.267059	0	0.709422	0	5.94718	2.73e-09	#ERROR!
CCNC	THAP9-AS1	0.376124	0	0.764873	0	5.94712	2.73e-09	#ERROR!
MACROD2	THAP9-AS1	0.261261	0	0.706235	0	5.94567	2.75e-09	#ERROR!
SEC22C	THAP9-AS1	0.387606	0	0.77032	0	5.94532	2.76e-09	#ERROR!
C1orf131	THAP9-AS1	0.446584	0	0.797792	0	5.94484	2.77e-09	#ERROR!
MYO6	THAP9-AS1	0.311616	0	0.732634	0	5.94456	2.77e-09	#ERROR!
FAM160A2	THAP9-AS1	0.403483	0	0.777751	0	5.94256	2.81e-09	#ERROR!
CD46	THAP9-AS1	0.316315	0	0.734934	0	5.94232	2.81e-09	#ERROR!
RNF152	THAP9-AS1	0.233501	4e-15	0.690912	0	5.94216	2.81e-09	#ERROR!
EDIL3	THAP9-AS1	0.012765	0.672095	0.554258	1.91e-10	5.94151	2.82e-09	0/+
SNX7	THAP9-AS1	0.247317	0	0.698462	0	5.94147	2.82e-09	#ERROR!
BTBD3	THAP9-AS1	0.420246	0	0.785557	0	5.94141	2.83e-09	#ERROR!
DDX17	THAP9-AS1	0.497468	0	0.820273	0	5.94127	2.83e-09	#ERROR!
TTC12	THAP9-AS1	0.192499	1.17e-10	0.66768	6.66e-16	5.94028	2.85e-09	#ERROR!
ELP1	THAP9-AS1	0.449318	0	0.798853	0	5.94003	2.85e-09	#ERROR!
LOC101927751	THAP9-AS1	0.136473	5.45e-06	0.634483	4.51e-14	5.9397	2.86e-09	#ERROR!
SIM2	THAP9-AS1	0.163884	4.47e-08	0.650938	6e-15	5.93964	2.86e-09	#ERROR!
PXMP4	THAP9-AS1	0.188494	2.85e-10	0.665296	8.88e-16	5.93897	2.87e-09	#ERROR!
SPATA17	THAP9-AS1	0.181377	1.32e-09	0.661122	1.55e-15	5.93818	2.88e-09	#ERROR!
GFI1	THAP9-AS1	0.176083	3.99e-09	0.658029	2.44e-15	5.93812	2.88e-09	#ERROR!
NEDD4L	THAP9-AS1	0.268813	0	0.709882	0	5.93783	2.89e-09	#ERROR!
LIN9	THAP9-AS1	0.426617	0	0.788365	0	5.93765	2.89e-09	#ERROR!
CEMIP	THAP9-AS1	-0.01267	0.674405	0.536067	9.42e-10	5.93713	2.9e-09	0/+
CNOT6L	THAP9-AS1	0.462528	0	0.804699	0	5.93705	2.9e-09	#ERROR!
CNOT11	THAP9-AS1	0.445548	0	0.797029	0	5.93704	2.9e-09	#ERROR!
ARID1B	THAP9-AS1	0.410537	0	0.780833	0	5.93668	2.91e-09	#ERROR!
CSTF3	THAP9-AS1	0.495009	0	0.819034	0	5.93627	2.92e-09	#ERROR!
FAS	THAP9-AS1	0.211532	1.3e-12	0.678241	0	5.93503	2.94e-09	#ERROR!
SLC11A2	THAP9-AS1	0.486832	0	0.815397	0	5.93456	2.95e-09	#ERROR!
RIOK2	THAP9-AS1	0.402731	0	0.777045	0	5.93398	2.96e-09	#ERROR!
MTMR6	THAP9-AS1	0.363954	0	0.758378	0	5.93382	2.96e-09	#ERROR!
TMEM255A	THAP9-AS1	0.132678	9.92e-06	0.631761	6.22e-14	5.93312	2.97e-09	#ERROR!
LOC105374171	THAP9-AS1	0.056266	0.061875	0.583126	1.23e-11	5.93296	2.98e-09	0/+
TRPS1	THAP9-AS1	0.278704	0	0.714895	0	5.93283	2.98e-09	#ERROR!
LOC100287896	THAP9-AS1	0.379529	0	0.765908	0	5.9328	2.98e-09	#ERROR!
RIF1	THAP9-AS1	0.443627	0	0.795936	0	5.93127	3.01e-09	#ERROR!
OR52N4	THAP9-AS1	0.179137	2.12e-09	0.659384	2e-15	5.93073	3.02e-09	#ERROR!
GPR161	THAP9-AS1	0.222514	7.9e-14	0.684148	0	5.93015	3.03e-09	#ERROR!
E2F5	THAP9-AS1	0.428427	0	0.7889	0	5.92988	3.03e-09	#ERROR!
ARL4A	THAP9-AS1	0.236623	1.78e-15	0.691947	0	5.92934	3.04e-09	#ERROR!
IFT27	THAP9-AS1	0.261172	0	0.705268	0	5.92791	3.07e-09	#ERROR!
ALG10	THAP9-AS1	0.340773	0	0.746616	0	5.92748	3.08e-09	#ERROR!
CCDC126	THAP9-AS1	0.215417	4.9e-13	0.679949	0	5.9263	3.1e-09	#ERROR!
FAM104A	THAP9-AS1	0.379545	0	0.765583	0	5.92498	3.12e-09	#ERROR!
BORCS7	THAP9-AS1	0.27516	0	0.712606	0	5.92481	3.13e-09	#ERROR!
KLHL28	THAP9-AS1	0.343319	0	0.747743	0	5.92426	3.14e-09	#ERROR!
TMEM248	THAP9-AS1	0.448107	0	0.797702	0	5.92394	3.14e-09	#ERROR!
TOMM20	THAP9-AS1	0.414156	0	0.781985	0	5.92306	3.16e-09	#ERROR!
CMAS	THAP9-AS1	0.38193	0	0.766615	0	5.92215	3.18e-09	#ERROR!
SLX4IP	THAP9-AS1	0.387491	0	0.769251	0	5.92115	3.2e-09	#ERROR!
MYH4	THAP9-AS1	0.045211	0.133642	0.574915	2.75e-11	5.92063	3.21e-09	0/+
LOC100128108	THAP9-AS1	0.186957	3.99e-10	0.66333	1.33e-15	5.92028	3.21e-09	#ERROR!
ACYP1	THAP9-AS1	0.401986	0	0.776111	0	5.91973	3.22e-09	#ERROR!
CDKAL1	THAP9-AS1	0.467862	0	0.806437	0	5.919	3.24e-09	#ERROR!
TRIP11	THAP9-AS1	0.300308	0	0.72552	0	5.91823	3.25e-09	#ERROR!
NSF	THAP9-AS1	0.292622	0	0.721495	0	5.91805	3.26e-09	#ERROR!
NUCB2	THAP9-AS1	0.153474	3.07e-07	0.643293	1.55e-14	5.91561	3.31e-09	#ERROR!
CHMP4A	THAP9-AS1	0.364663	0	0.757923	0	5.9155	3.31e-09	#ERROR!
NAA35	THAP9-AS1	0.466454	0	0.805678	0	5.91547	3.31e-09	#ERROR!
CFAP44	THAP9-AS1	0.376707	0	0.763729	0	5.9138	3.34e-09	#ERROR!
AKAP5	THAP9-AS1	0.210067	1.86e-12	0.675982	2.22e-16	5.9094	3.43e-09	#ERROR!
CEP70	THAP9-AS1	0.382279	0	0.766212	0	5.90869	3.45e-09	#ERROR!
KDM5A	THAP9-AS1	0.378924	0	0.764516	0	5.90703	3.48e-09	#ERROR!
SLC22A1	THAP9-AS1	0.115016	0.00013	0.619153	2.68e-13	5.90618	3.5e-09	#ERROR!
PIP5K1B	THAP9-AS1	0.138682	3.82e-06	0.633727	4.93e-14	5.90554	3.51e-09	#ERROR!
INO80D	THAP9-AS1	0.478134	0	0.810535	0	5.90541	3.52e-09	#ERROR!
SNAP23	THAP9-AS1	0.361903	0	0.756071	0	5.90424	3.54e-09	#ERROR!
NEBL	THAP9-AS1	0.274133	0	0.710918	0	5.90235	3.58e-09	#ERROR!
SYCP2L	THAP9-AS1	0.25993	0	0.703255	0	5.90204	3.59e-09	#ERROR!
ARL13B	THAP9-AS1	0.393239	0	0.771207	0	5.90201	3.59e-09	#ERROR!
PPP1R8	THAP9-AS1	0.506254	0	0.822777	0	5.90201	3.59e-09	#ERROR!
ODR4	THAP9-AS1	0.396145	0	0.772563	0	5.90117	3.61e-09	#ERROR!
AHR	THAP9-AS1	0.198384	3.05e-11	0.668653	4.44e-16	5.89793	3.68e-09	#ERROR!
NMD3	THAP9-AS1	0.394011	0	0.771365	0	5.89692	3.7e-09	#ERROR!
NARS2	THAP9-AS1	0.363448	0	0.756507	0	5.89687	3.7e-09	#ERROR!
TEX10	THAP9-AS1	0.516947	0	0.827232	0	5.89681	3.71e-09	#ERROR!
IQGAP1	THAP9-AS1	0.28929	0	0.718549	0	5.89397	3.77e-09	#ERROR!
CRYBG1	THAP9-AS1	0.212024	1.15e-12	0.676229	2.22e-16	5.89394	3.77e-09	#ERROR!
C12orf76	THAP9-AS1	0.436705	0	0.791263	0	5.89206	3.81e-09	#ERROR!
SLC25A40	THAP9-AS1	0.506595	0	0.822587	0	5.89184	3.82e-09	#ERROR!
NKRF	THAP9-AS1	0.475746	0	0.80898	0	5.89155	3.83e-09	#ERROR!
LSG1	THAP9-AS1	0.435785	0	0.790809	0	5.89131	3.83e-09	#ERROR!
POLR2J4	THAP9-AS1	0.356921	0	0.752925	0	5.88887	3.89e-09	#ERROR!
SPRYD7	THAP9-AS1	0.33276	0	0.740724	0	5.88724	3.93e-09	#ERROR!
TIRAP	THAP9-AS1	0.293826	0	0.720578	0	5.88671	3.94e-09	#ERROR!
HIF1A	THAP9-AS1	0.180265	1.67e-09	0.657462	2.66e-15	5.88646	3.95e-09	#ERROR!
TRMT6	THAP9-AS1	0.423675	0	0.784969	0	5.88598	3.96e-09	#ERROR!
MED20	THAP9-AS1	0.449811	0	0.797045	0	5.88569	3.96e-09	#ERROR!
MYO9A	THAP9-AS1	0.344087	0	0.74637	0	5.88564	3.97e-09	#ERROR!
DYNC1LI1	THAP9-AS1	0.348548	0	0.748592	0	5.88531	3.97e-09	#ERROR!
SLC39A6	THAP9-AS1	0.114849	0.000133	0.61766	3.17e-13	5.88434	4e-09	#ERROR!
TMEM69	THAP9-AS1	0.437268	0	0.791212	0	5.88397	4.01e-09	#ERROR!
PLD1	THAP9-AS1	0.169734	1.43e-08	0.650997	5.77e-15	5.8822	4.05e-09	#ERROR!
SPTLC2	THAP9-AS1	0.185026	6.06e-10	0.659991	1.78e-15	5.88201	4.05e-09	#ERROR!
ANKDD1B	THAP9-AS1	0.166176	2.88e-08	0.648844	7.77e-15	5.88156	4.06e-09	#ERROR!
METTL2A	THAP9-AS1	0.379957	0	0.76392	0	5.88139	4.07e-09	#ERROR!
TAP2	THAP9-AS1	0.205733	5.36e-12	0.671917	4.44e-16	5.88107	4.08e-09	#ERROR!
C17orf80	THAP9-AS1	0.410308	0	0.778479	0	5.88106	4.08e-09	#ERROR!
LOC100506258	THAP9-AS1	0.261057	0	0.702762	0	5.88084	4.08e-09	#ERROR!
TDP1	THAP9-AS1	0.42766	0	0.786612	0	5.88044	4.09e-09	#ERROR!
P2RY10	THAP9-AS1	0.125221	3.07e-05	0.623835	1.57e-13	5.87971	4.11e-09	#ERROR!
PLEKHA1	THAP9-AS1	0.422481	0	0.784151	0	5.87944	4.12e-09	#ERROR!
LOC101929719	THAP9-AS1	0.235899	2.22e-15	0.688856	0	5.87942	4.12e-09	#ERROR!
GATAD2B	THAP9-AS1	0.485048	0	0.812691	0	5.87934	4.12e-09	#ERROR!
DROSHA	THAP9-AS1	0.428871	0	0.787086	0	5.87813	4.15e-09	#ERROR!
PCDHGA9	THAP9-AS1	0.109067	0.000286	0.613569	5e-13	5.87723	4.17e-09	#ERROR!
POP1	THAP9-AS1	0.373466	0	0.76056	0	5.87698	4.18e-09	#ERROR!
MTF1	THAP9-AS1	0.396805	0	0.771839	0	5.87614	4.2e-09	#ERROR!
DNAJB9	THAP9-AS1	0.253424	0	0.698324	0	5.87558	4.21e-09	#ERROR!
MED14	THAP9-AS1	0.405357	0	0.775842	0	5.87407	4.25e-09	#ERROR!
INTS6-AS1	THAP9-AS1	0.348237	0	0.747907	0	5.87364	4.26e-09	#ERROR!
FARP2	THAP9-AS1	0.408489	0	0.777278	0	5.87273	4.29e-09	#ERROR!
NUP98	THAP9-AS1	0.421109	0	0.78317	0	5.87096	4.33e-09	#ERROR!
B4GALT4	THAP9-AS1	0.293995	0	0.719881	0	5.87084	4.34e-09	#ERROR!
MIPEP	THAP9-AS1	0.234263	3.33e-15	0.687443	0	5.87018	4.35e-09	#ERROR!
SEC11C	THAP9-AS1	0.127478	2.19e-05	0.624624	1.43e-13	5.86998	4.36e-09	#ERROR!
ABCA5	THAP9-AS1	0.301273	0	0.723661	0	5.86992	4.36e-09	#ERROR!
TMEM33	THAP9-AS1	0.439118	0	0.791513	0	5.86956	4.37e-09	#ERROR!
ATG16L1	THAP9-AS1	0.358024	0	0.752565	0	5.86852	4.4e-09	#ERROR!
TMTC2	THAP9-AS1	0.28115	0	0.712932	0	5.86818	4.41e-09	#ERROR!
MAGI1	THAP9-AS1	0.356485	0	0.75177	0	5.86787	4.41e-09	#ERROR!
HSD17B7P2	THAP9-AS1	0.302317	0	0.724085	0	5.8674	4.43e-09	#ERROR!
CEACAM19	THAP9-AS1	0.219599	1.68e-13	0.679048	0	5.8674	4.43e-09	#ERROR!
DOCK10	THAP9-AS1	0.1977	3.57e-11	0.66651	8.88e-16	5.86729	4.43e-09	#ERROR!
ARF6	THAP9-AS1	0.374378	0	0.76058	0	5.86715	4.43e-09	#ERROR!
CFAP97	THAP9-AS1	0.439442	0	0.79157	0	5.86711	4.43e-09	#ERROR!
SSR3	THAP9-AS1	0.291108	0	0.718159	0	5.86688	4.44e-09	#ERROR!
ABHD10	THAP9-AS1	0.393774	0	0.769957	0	5.86597	4.47e-09	#ERROR!
FBXO38	THAP9-AS1	0.361287	0	0.754017	0	5.86472	4.5e-09	#ERROR!
RNU6-1065P	THAP9-AS1	0.146979	9.57e-07	0.636186	3.69e-14	5.86331	4.54e-09	#ERROR!
RBM12	THAP9-AS1	0.455959	0	0.799016	0	5.86328	4.54e-09	#ERROR!
KIAA1191	THAP9-AS1	0.412623	0	0.778849	0	5.86312	4.54e-09	#ERROR!
RBFOX2	THAP9-AS1	0.351269	0	0.748923	0	5.86252	4.56e-09	#ERROR!
BLZF1	THAP9-AS1	0.415657	0	0.780246	0	5.86212	4.57e-09	#ERROR!
IFT81	THAP9-AS1	0.45637	0	0.799151	0	5.86186	4.58e-09	#ERROR!
MORC3	THAP9-AS1	0.424984	0	0.78462	0	5.86167	4.58e-09	#ERROR!
FAM120A	THAP9-AS1	0.391995	0	0.76891	0	5.86148	4.59e-09	#ERROR!
FGF1	THAP9-AS1	0.15023	5.45e-07	0.638018	2.95e-14	5.86095	4.6e-09	#ERROR!
CARMIL1	THAP9-AS1	0.334599	0	0.740357	0	5.85924	4.65e-09	#ERROR!
PTPN9	THAP9-AS1	0.393272	0	0.76943	0	5.85919	4.65e-09	#ERROR!
C8orf58	THAP9-AS1	0.211031	1.47e-12	0.673706	4.44e-16	5.85903	4.66e-09	#ERROR!
CUL5	THAP9-AS1	0.387644	0	0.766688	0	5.85872	4.66e-09	#ERROR!
JAKMIP3	THAP9-AS1	0.205123	6.21e-12	0.670264	4.44e-16	5.85805	4.68e-09	#ERROR!
SMARCD1	THAP9-AS1	0.5137	0	0.8245	0	5.85631	4.73e-09	#ERROR!
PROX2	THAP9-AS1	0.228621	1.55e-14	0.683481	0	5.85549	4.76e-09	#ERROR!
CSRNP3	THAP9-AS1	0.141793	2.29e-06	0.632535	5.68e-14	5.85541	4.76e-09	#ERROR!
AGO1	THAP9-AS1	0.39058	0	0.767925	0	5.85434	4.79e-09	#ERROR!
PIWIL4	THAP9-AS1	0.272062	0	0.707335	0	5.85411	4.8e-09	#ERROR!
NFKB1	THAP9-AS1	0.365483	0	0.755619	0	5.85394	4.8e-09	#ERROR!
PAK5	THAP9-AS1	0.163955	4.41e-08	0.645822	1.13e-14	5.85322	4.82e-09	#ERROR!
GLT8D1	THAP9-AS1	0.372981	0	0.759276	0	5.85294	4.83e-09	#ERROR!
FANCM	THAP9-AS1	0.418659	0	0.781273	0	5.85238	4.85e-09	#ERROR!
IL1RAPL2	THAP9-AS1	0.056069	0.062794	0.577473	2.14e-11	5.85209	4.85e-09	0/+
MTMR11	THAP9-AS1	0.312325	0	0.728549	0	5.85184	4.86e-09	#ERROR!
LINC01060	THAP9-AS1	0.100179	0.000868	0.60621	1.12e-12	5.85071	4.89e-09	#ERROR!
STOX2	THAP9-AS1	0.259679	0	0.700398	0	5.84997	4.92e-09	#ERROR!
GVQW3	THAP9-AS1	0.376026	0	0.76058	0	5.84853	4.96e-09	#ERROR!
TAF4	THAP9-AS1	0.427017	0	0.78505	0	5.84842	4.96e-09	#ERROR!
RNF128	THAP9-AS1	0.160139	9.06e-08	0.643162	1.58e-14	5.84707	5e-09	#ERROR!
CENATAC	THAP9-AS1	0.383879	0	0.764317	0	5.84607	5.03e-09	#ERROR!
GBP2	THAP9-AS1	0.183575	8.29e-10	0.657009	2.66e-15	5.84547	5.05e-09	#ERROR!
FMO5	THAP9-AS1	0.07903	0.008674	0.592135	4.93e-12	5.8445	5.08e-09	#ERROR!
LPAR6	THAP9-AS1	0.283254	0	0.712843	0	5.84421	5.09e-09	#ERROR!
PIGW	THAP9-AS1	0.389369	0	0.766895	0	5.84388	5.1e-09	#ERROR!
CRYZ	THAP9-AS1	0.346549	0	0.74568	0	5.84338	5.12e-09	#ERROR!
NELL2	THAP9-AS1	0.144425	1.48e-06	0.633398	5.13e-14	5.84329	5.12e-09	#ERROR!
PLXDC2	THAP9-AS1	0.176448	3.7e-09	0.65264	4.88e-15	5.84271	5.14e-09	#ERROR!
THAP6	THAP9-AS1	0.493857	0	0.815291	0	5.84165	5.17e-09	#ERROR!
LCA5L	THAP9-AS1	0.32297	0	0.733568	0	5.84154	5.17e-09	#ERROR!
NFRKB	THAP9-AS1	0.37743	0	0.760887	0	5.8397	5.23e-09	#ERROR!
RIMKLA	THAP9-AS1	0.101686	0.000723	0.606436	1.09e-12	5.83938	5.24e-09	#ERROR!
NAV2	THAP9-AS1	0.253647	0	0.696445	0	5.83775	5.29e-09	#ERROR!
LRGUK	THAP9-AS1	0.173415	6.87e-09	0.65051	6.22e-15	5.83716	5.31e-09	#ERROR!
ERLEC1	THAP9-AS1	0.342845	0	0.743481	0	5.83627	5.34e-09	#ERROR!
NALCN	THAP9-AS1	0.118642	7.88e-05	0.616933	3.44e-13	5.83557	5.36e-09	#ERROR!
DSC2	THAP9-AS1	0.280272	0	0.710793	0	5.83531	5.37e-09	#ERROR!
CASC2	THAP9-AS1	0.289629	0	0.715736	0	5.83413	5.41e-09	#ERROR!
LOC105369201	THAP9-AS1	0.154351	2.62e-07	0.638836	2.66e-14	5.8334	5.43e-09	#ERROR!
ATF7IP2	THAP9-AS1	0.276373	0	0.708527	0	5.83203	5.48e-09	#ERROR!
KCTD9	THAP9-AS1	0.376376	0	0.760021	0	5.8317	5.49e-09	#ERROR!
PRR14L	THAP9-AS1	0.380216	0	0.761811	0	5.82946	5.56e-09	#ERROR!
PEX26	THAP9-AS1	0.368552	0	0.75604	0	5.82903	5.57e-09	#ERROR!
TAF1A	THAP9-AS1	0.432775	0	0.786967	0	5.82853	5.59e-09	#ERROR!
CDYL	THAP9-AS1	0.333311	0	0.73823	0	5.82776	5.62e-09	#ERROR!
DTWD2	THAP9-AS1	0.266725	0	0.703022	0	5.82666	5.65e-09	#ERROR!
SGO2	THAP9-AS1	0.393954	0	0.76835	0	5.82568	5.69e-09	#ERROR!
DESI1	THAP9-AS1	0.353261	0	0.748253	0	5.82563	5.69e-09	#ERROR!
SCGB2B2	THAP9-AS1	0.261311	0	0.699993	0	5.82526	5.7e-09	#ERROR!
MAGI3	THAP9-AS1	0.278469	0	0.709214	0	5.82338	5.77e-09	#ERROR!
CREB3L2	THAP9-AS1	0.264631	0	0.701681	0	5.82284	5.79e-09	#ERROR!
TRAPPC2	THAP9-AS1	0.464849	0	0.801544	0	5.82199	5.81e-09	#ERROR!
SOX9	THAP9-AS1	0.199962	2.11e-11	0.665206	8.88e-16	5.82166	5.83e-09	#ERROR!
MFSD4B	THAP9-AS1	0.26963	0	0.704305	0	5.82094	5.85e-09	#ERROR!
PSD3	THAP9-AS1	0.190599	1.79e-10	0.659657	1.78e-15	5.82015	5.88e-09	#ERROR!
GOLGA8A	THAP9-AS1	0.347366	0	0.745022	0	5.81996	5.89e-09	#ERROR!
RPL17P6	THAP9-AS1	0.310181	0	0.725803	0	5.81829	5.95e-09	#ERROR!
PDCD6IP	THAP9-AS1	0.391776	0	0.766968	0	5.81801	5.96e-09	#ERROR!
IKZF3	THAP9-AS1	0.203474	9.21e-12	0.666975	8.88e-16	5.81699	5.99e-09	#ERROR!
GCH1	THAP9-AS1	0.20733	3.64e-12	0.669185	4.44e-16	5.81665	6e-09	#ERROR!
CWF19L1	THAP9-AS1	0.503025	0	0.818488	0	5.81651	6.01e-09	#ERROR!
GSTO2	THAP9-AS1	0.231661	6.66e-15	0.682931	0	5.8143	6.09e-09	#ERROR!
SLC16A5	THAP9-AS1	0.178011	2.68e-09	0.651819	5.33e-15	5.81318	6.13e-09	#ERROR!
DDIAS	THAP9-AS1	0.291886	0	0.715882	0	5.81309	6.13e-09	#ERROR!
SPCS2	THAP9-AS1	0.31199	0	0.72649	0	5.81295	6.14e-09	#ERROR!
MBOAT2	THAP9-AS1	0.238482	8.88e-16	0.686639	0	5.81199	6.17e-09	#ERROR!
CCAR1	THAP9-AS1	0.519093	0	0.825359	0	5.811	6.21e-09	#ERROR!
TOP1	THAP9-AS1	0.403953	0	0.772559	0	5.81077	6.22e-09	#ERROR!
LINC00863	THAP9-AS1	0.229429	1.24e-14	0.681409	0	5.80954	6.26e-09	#ERROR!
TRPC1	THAP9-AS1	0.2524	0	0.694199	0	5.80844	6.31e-09	#ERROR!
NIBAN1	THAP9-AS1	0.148837	6.94e-07	0.633887	4.84e-14	5.80743	6.34e-09	#ERROR!
CTBP2	THAP9-AS1	0.372834	0	0.757172	0	5.80652	6.38e-09	#ERROR!
SLC2A12	THAP9-AS1	0.098615	0.001046	0.60225	1.71e-12	5.80546	6.42e-09	#ERROR!
H4-16	THAP9-AS1	0.173917	6.2e-09	0.648919	7.55e-15	5.80539	6.42e-09	#ERROR!
RNF4	THAP9-AS1	0.464768	0	0.80088	0	5.80499	6.44e-09	#ERROR!
KHNYN	THAP9-AS1	0.349272	0	0.745265	0	5.80421	6.47e-09	#ERROR!
SRSF12	THAP9-AS1	0.209702	2.04e-12	0.669846	4.44e-16	5.80419	6.47e-09	#ERROR!
MINDY1	THAP9-AS1	0.218079	2.49e-13	0.674597	2.22e-16	5.80314	6.51e-09	#ERROR!
EFHC2	THAP9-AS1	0.125987	2.74e-05	0.619416	2.6e-13	5.80219	6.55e-09	#ERROR!
LINC02453	THAP9-AS1	0.258477	0	0.697185	0	5.80151	6.57e-09	#ERROR!
HSD17B7	THAP9-AS1	0.267165	0	0.701945	0	5.80141	6.58e-09	#ERROR!
LAYN	THAP9-AS1	0.124875	3.22e-05	0.618666	2.83e-13	5.80135	6.58e-09	#ERROR!
NFATC2IP	THAP9-AS1	0.489418	0	0.811898	0	5.80104	6.59e-09	#ERROR!
ING3	THAP9-AS1	0.495194	0	0.814475	0	5.80088	6.6e-09	#ERROR!
MLH3	THAP9-AS1	0.413525	0	0.776727	0	5.80039	6.62e-09	#ERROR!
FAM117B	THAP9-AS1	0.429487	0	0.78431	0	5.80032	6.62e-09	#ERROR!
OBI1	THAP9-AS1	0.459444	0	0.79825	0	5.79993	6.63e-09	#ERROR!
GOLGA1	THAP9-AS1	0.38676	0	0.763726	0	5.79941	6.65e-09	#ERROR!
RNF138	THAP9-AS1	0.42758	0	0.783364	0	5.7992	6.66e-09	#ERROR!
HMGCR	THAP9-AS1	0.305868	0	0.722553	0	5.79819	6.7e-09	#ERROR!
CCR2	THAP9-AS1	0.123408	4e-05	0.617531	3.22e-13	5.79798	6.71e-09	#ERROR!
ELOA-AS1	THAP9-AS1	0.357532	0	0.749147	0	5.7979	6.72e-09	#ERROR!
RPS3AP34	THAP9-AS1	0.216514	3.71e-13	0.673375	4.44e-16	5.79734	6.74e-09	#ERROR!
FIGNL1	THAP9-AS1	0.456364	0	0.796725	0	5.79709	6.75e-09	#ERROR!
MORN4	THAP9-AS1	0.316285	0	0.727962	0	5.79702	6.75e-09	#ERROR!
SPRED3	THAP9-AS1	0.164517	3.96e-08	0.64271	1.67e-14	5.79593	6.79e-09	#ERROR!
APOBEC3C	THAP9-AS1	0.153526	3.04e-07	0.63603	3.75e-14	5.79571	6.8e-09	#ERROR!
ITK	THAP9-AS1	0.154915	2.37e-07	0.636848	3.4e-14	5.79523	6.82e-09	#ERROR!
ADAM28	THAP9-AS1	0.170098	1.33e-08	0.646002	1.11e-14	5.79483	6.84e-09	#ERROR!
NOL7	THAP9-AS1	0.368146	0	0.754303	0	5.79433	6.86e-09	#ERROR!
SRFBP1	THAP9-AS1	0.410341	0	0.77494	0	5.79401	6.87e-09	#ERROR!
MARCHF8	THAP9-AS1	0.261091	0	0.698114	0	5.79187	6.96e-09	#ERROR!
CASP12	THAP9-AS1	0.160455	8.55e-08	0.640007	2.31e-14	5.79185	6.96e-09	#ERROR!
NDUFA6-DT	THAP9-AS1	0.277116	0	0.706805	0	5.7907	7.01e-09	#ERROR!
OSBP	THAP9-AS1	0.355547	0	0.747777	0	5.78974	7.05e-09	#ERROR!
TBX3	THAP9-AS1	0.191911	1.33e-10	0.658631	2.22e-15	5.78932	7.07e-09	#ERROR!
DYRK1A	THAP9-AS1	0.507074	0	0.819352	0	5.7892	7.07e-09	#ERROR!
PIP5K1A	THAP9-AS1	0.477822	0	0.806236	0	5.78884	7.09e-09	#ERROR!
TAF4B	THAP9-AS1	0.388319	0	0.764011	0	5.78824	7.11e-09	#ERROR!
CASP8	THAP9-AS1	0.33197	0	0.735652	0	5.78759	7.14e-09	#ERROR!
CCL28	THAP9-AS1	0.110592	0.000235	0.608644	8.59e-13	5.78589	7.21e-09	#ERROR!
MPP7	THAP9-AS1	0.20324	9.74e-12	0.66503	8.88e-16	5.7854	7.23e-09	#ERROR!
ERBB4	THAP9-AS1	0.124503	3.41e-05	0.617414	3.26e-13	5.78536	7.24e-09	#ERROR!
RNGTT	THAP9-AS1	0.401082	0	0.770096	0	5.78498	7.25e-09	#ERROR!
CFAP206	THAP9-AS1	0.126717	2.46e-05	0.618753	2.8e-13	5.78455	7.27e-09	#ERROR!
CX3CR1	THAP9-AS1	0.046767	0.120765	0.566518	6.14e-11	5.78453	7.27e-09	0/+
PRTG	THAP9-AS1	0.161366	7.2e-08	0.64011	2.29e-14	5.78445	7.27e-09	#ERROR!
DHX35	THAP9-AS1	0.546144	0	0.836173	0	5.78323	7.33e-09	#ERROR!
C3orf35	THAP9-AS1	0.328721	0	0.733749	0	5.78287	7.34e-09	#ERROR!
CEP43	THAP9-AS1	0.478291	0	0.806189	0	5.78161	7.4e-09	#ERROR!
RTL6	THAP9-AS1	0.27559	0	0.705479	0	5.78107	7.42e-09	#ERROR!
MPHOSPH8	THAP9-AS1	0.436311	0	0.786746	0	5.78055	7.45e-09	#ERROR!
FCRL2	THAP9-AS1	0.118995	7.5e-05	0.613526	5.02e-13	5.77887	7.52e-09	#ERROR!
SDAD1	THAP9-AS1	0.51151	0	0.820926	0	5.77772	7.57e-09	#ERROR!
TP53BP1	THAP9-AS1	0.319452	0	0.728631	0	5.77664	7.62e-09	#ERROR!
PTCHD1	THAP9-AS1	0.133672	8.49e-06	0.622572	1.82e-13	5.77616	7.64e-09	#ERROR!
LINC02328	THAP9-AS1	0.161464	7.07e-08	0.639595	2.44e-14	5.775	7.7e-09	#ERROR!
PDK3	THAP9-AS1	0.228848	1.47e-14	0.678988	0	5.77172	7.85e-09	#ERROR!
LRRC58	THAP9-AS1	0.384728	0	0.761496	0	5.77084	7.89e-09	#ERROR!
CMTM8	THAP9-AS1	0.220252	1.42e-13	0.673957	4.44e-16	5.76956	7.95e-09	#ERROR!
HEPH	THAP9-AS1	0.121608	5.18e-05	0.614563	4.48e-13	5.76928	7.96e-09	#ERROR!
ACP1	THAP9-AS1	0.47354	0	0.803565	0	5.76891	7.98e-09	#ERROR!
OSBPL10	THAP9-AS1	0.177685	2.87e-09	0.648944	7.55e-15	5.76804	8.02e-09	#ERROR!
BPNT1	THAP9-AS1	0.448801	0	0.792104	0	5.76779	8.03e-09	#ERROR!
TAF11	THAP9-AS1	0.455969	0	0.795423	0	5.76739	8.05e-09	#ERROR!
SRGAP1	THAP9-AS1	0.273353	0	0.703546	0	5.76728	8.06e-09	#ERROR!
MDM2	THAP9-AS1	0.389907	0	0.763828	0	5.7658	8.13e-09	#ERROR!
TMEM237	THAP9-AS1	0.457314	0	0.795983	0	5.76572	8.13e-09	#ERROR!
CHORDC1	THAP9-AS1	0.377765	0	0.75782	0	5.76555	8.14e-09	#ERROR!
SMCR8	THAP9-AS1	0.317527	0	0.727083	0	5.76548	8.14e-09	#ERROR!
RAVER2	THAP9-AS1	0.33583	0	0.736553	0	5.76452	8.19e-09	#ERROR!
MRPS30	THAP9-AS1	0.17136	1.04e-08	0.644902	1.27e-14	5.76389	8.22e-09	#ERROR!
LINC01588	THAP9-AS1	0.165298	3.41e-08	0.641204	2e-14	5.76324	8.25e-09	#ERROR!
FGF14	THAP9-AS1	0.052583	0.081022	0.568952	4.88e-11	5.7628	8.27e-09	0/+
CRCP	THAP9-AS1	0.486915	0	0.809391	0	5.76193	8.32e-09	#ERROR!
RNF180	THAP9-AS1	0.19175	1.38e-10	0.656882	2.66e-15	5.761	8.36e-09	#ERROR!
EPC1	THAP9-AS1	0.530033	0	0.828459	0	5.75962	8.43e-09	#ERROR!
TAOK3	THAP9-AS1	0.367523	0	0.752431	0	5.75927	8.45e-09	#ERROR!
ARL3	THAP9-AS1	0.198184	3.19e-11	0.660562	1.78e-15	5.75917	8.45e-09	#ERROR!
DPY19L4	THAP9-AS1	0.411076	0	0.773834	0	5.75861	8.48e-09	#ERROR!
TEX2	THAP9-AS1	0.31553	0	0.725689	0	5.75836	8.49e-09	#ERROR!
ARSK	THAP9-AS1	0.312047	0	0.723837	0	5.75801	8.51e-09	#ERROR!
LPP-AS2	THAP9-AS1	0.182126	1.13e-09	0.650933	6e-15	5.75692	8.57e-09	#ERROR!
IQCB1	THAP9-AS1	0.507399	0	0.818397	0	5.7568	8.57e-09	#ERROR!
SLC39A8	THAP9-AS1	0.269234	0	0.700728	0	5.75649	8.59e-09	#ERROR!
HLA-DOB	THAP9-AS1	0.138066	4.22e-06	0.624055	1.53e-13	5.75625	8.6e-09	#ERROR!
QSER1	THAP9-AS1	0.382944	0	0.759956	0	5.75565	8.63e-09	#ERROR!
ESCO1	THAP9-AS1	0.517477	0	0.82279	0	5.75468	8.68e-09	#ERROR!
C7orf31	THAP9-AS1	0.229456	1.24e-14	0.678349	0	5.754	8.72e-09	#ERROR!
GMPR2	THAP9-AS1	0.266328	0	0.698998	0	5.75396	8.72e-09	#ERROR!
SETD4	THAP9-AS1	0.554299	0	0.838727	0	5.75267	8.78e-09	#ERROR!
SMCHD1	THAP9-AS1	0.400585	0	0.768487	0	5.75247	8.8e-09	#ERROR!
COMMD3	THAP9-AS1	0.294537	0	0.714248	0	5.75245	8.8e-09	#ERROR!
EIF3J-DT	THAP9-AS1	0.365122	0	0.750807	0	5.74997	8.93e-09	#ERROR!
NUP62CL	THAP9-AS1	0.213822	7.33e-13	0.669144	4.44e-16	5.74995	8.93e-09	#ERROR!
FZD3	THAP9-AS1	0.229677	1.15e-14	0.678231	0	5.7496	8.95e-09	#ERROR!
HERC4	THAP9-AS1	0.446922	0	0.790503	0	5.74904	8.97e-09	#ERROR!
IQCA1	THAP9-AS1	0.149051	6.69e-07	0.630376	7.33e-14	5.74852	9e-09	#ERROR!
KCTD19	THAP9-AS1	0.22801	1.82e-14	0.677203	2.22e-16	5.74822	9.02e-09	#ERROR!
BOLA3-AS1	THAP9-AS1	0.251893	0	0.690623	0	5.747	9.08e-09	#ERROR!
SDCCAG8	THAP9-AS1	0.433011	0	0.783841	0	5.74645	9.11e-09	#ERROR!
MASP2	THAP9-AS1	0.351401	0	0.743694	0	5.7464	9.12e-09	#ERROR!
CIRBP	THAP9-AS1	0.193761	8.79e-11	0.657204	2.66e-15	5.74623	9.13e-09	#ERROR!
TTI1	THAP9-AS1	0.41188	0	0.773695	0	5.74583	9.15e-09	#ERROR!
DDX10	THAP9-AS1	0.368375	0	0.752235	0	5.74533	9.17e-09	#ERROR!
HERPUD1	THAP9-AS1	0.201949	1.32e-11	0.661966	1.33e-15	5.74532	9.17e-09	#ERROR!
CNNM2	THAP9-AS1	0.289301	0	0.711027	0	5.74447	9.22e-09	#ERROR!
RUNX3	THAP9-AS1	0.134246	7.76e-06	0.620914	2.19e-13	5.74425	9.23e-09	#ERROR!
IQCH-AS1	THAP9-AS1	0.394042	0	0.764829	0	5.74173	9.37e-09	#ERROR!
SLC26A4	THAP9-AS1	0.178955	2.2e-09	0.648069	8.44e-15	5.74064	9.43e-09	#ERROR!
PARN	THAP9-AS1	0.344909	0	0.740031	0	5.73904	9.52e-09	#ERROR!
SPIN3	THAP9-AS1	0.462558	0	0.797404	0	5.73892	9.53e-09	#ERROR!
DET1	THAP9-AS1	0.368466	0	0.751941	0	5.73772	9.6e-09	#ERROR!
PPM1K	THAP9-AS1	0.28475	0	0.708214	0	5.73761	9.6e-09	#ERROR!
CCDC77	THAP9-AS1	0.446226	0	0.789723	0	5.73731	9.62e-09	#ERROR!
EXOSC9	THAP9-AS1	0.55578	0	0.838889	0	5.73719	9.63e-09	#ERROR!
ABCE1	THAP9-AS1	0.521997	0	0.824193	0	5.73687	9.64e-09	#ERROR!
ANKRD36BP2	THAP9-AS1	0.213006	8.99e-13	0.667885	6.66e-16	5.73614	9.69e-09	#ERROR!
ERVK3-1	THAP9-AS1	0.37127	0	0.753228	0	5.73501	9.75e-09	#ERROR!
TMEM50B	THAP9-AS1	0.330133	0	0.73217	0	5.73434	9.79e-09	#ERROR!
RIT1	THAP9-AS1	0.404751	0	0.769699	0	5.73297	9.87e-09	#ERROR!
NFX1	THAP9-AS1	0.493697	0	0.811424	0	5.73274	9.88e-09	#ERROR!
RFT1	THAP9-AS1	0.383731	0	0.759317	0	5.73202	9.92e-09	#ERROR!
MTHFSD	THAP9-AS1	0.363881	0	0.749328	0	5.73102	9.98e-09	#ERROR!
RDH11	THAP9-AS1	0.306466	0	0.719548	0	5.731	9.98e-09	#ERROR!
SHISAL2A	THAP9-AS1	0.057624	0.055834	0.57012	4.36e-11	5.73047	1e-08	0/+
RAE1	THAP9-AS1	0.398741	0	0.766647	0	5.73028	1e-08	#ERROR!
C4orf33	THAP9-AS1	0.384006	0	0.759363	0	5.72995	1e-08	#ERROR!
LOC107985246	THAP9-AS1	0.241696	4.44e-16	0.683966	0	5.7299	1e-08	#ERROR!
[truncated: 28,370 more rows]

## Sheet: CHOL
Gene1	Gene2	TCGA_CHOL.PrimarySolidTumor_cor	TCGA_CHOL.PrimarySolidTumor_pVal	TCGA_CHOL.SolidTissueNormal_cor	TCGA_CHOL.SolidTissueNormal_pVal	zScoreDiff	pValDiff	Classes
LSM8	THAP9-AS1	-0.01004	0.953663	0.983333	1.94e-06	5.25154	1.51e-07	0/+
BCLAF3	THAP9-AS1	0.170399	0.320416	0.983333	1.94e-06	4.85297	1.22e-06	0/+
FOXP4	THAP9-AS1	0.250965	0.139838	0.983333	1.94e-06	4.66834	3.04e-06	0/+
DRC3	THAP9-AS1	0.17956	0.294692	0.979088	4.27e-06	4.58165	4.61e-06	0/+
BRWD1-AS2	THAP9-AS1	-0.08575	0.619023	0.953065	7.04e-05	4.26792	1.97e-05	0/+
DDX55	THAP9-AS1	0.168082	0.327137	0.966667	2.16e-05	4.09048	4.3e-05	0/+
HNF1A	THAP9-AS1	-0.54311	0.00062	0.85	0.003705	4.08094	4.49e-05	-/+
EGOT	THAP9-AS1	0.076883	0.655827	0.953983	6.58e-05	3.93334	8.38e-05	0/+
EXOSC3	THAP9-AS1	0.250869	0.139995	0.966667	2.16e-05	3.90085	9.59e-05	0/+
C11orf65	THAP9-AS1	0.258942	0.127268	0.966421	2.21e-05	3.87377	0.000107	0/+
GMNC	THAP9-AS1	-0.16684	0.330763	0.92051	0.000431	3.85347	0.000116	0/+
FUT10	THAP9-AS1	0.293455	0.082375	0.966667	2.16e-05	3.80017	0.000145	0/+
CREBZF	THAP9-AS1	0.313791	0.062366	0.966667	2.16e-05	3.75115	0.000176	0/+
CFAP298	THAP9-AS1	0.118283	0.492039	0.95	8.76e-05	3.74878	0.000178	0/+
FDCSP	THAP9-AS1	0.307554	0.068045	-0.88312	0.001601	-3.73707	0.000186	0/-
EIF4A2	THAP9-AS1	0.343115	0.040492	0.966667	2.16e-05	3.6792	0.000234	#ERROR!
DPPA4	THAP9-AS1	0.026748	0.876937	-0.92888	0.000295	-3.66992	0.000243	0/-
GK3P	THAP9-AS1	0.241033	0.156735	-0.89087	0.001269	-3.65918	0.000253	0/-
MTF2	THAP9-AS1	0.043243	0.802263	0.933333	0.000236	3.58997	0.000331	0/+
GDI2P2	THAP9-AS1	0.421568	0.010445	-0.82158	0.006603	-3.52627	0.000421	#ERROR!
ORC3	THAP9-AS1	0.076963	0.655495	0.933333	0.000236	3.5159	0.000438	0/+
IGLV2-33	THAP9-AS1	0.308385	0.067265	-0.85716	0.003145	-3.50444	0.000458	0/-
GKAP1	THAP9-AS1	0.417916	0.011204	0.966667	2.16e-05	3.48761	0.000487	#ERROR!
CFAP57	THAP9-AS1	-0.11881	0.490087	0.9	0.000943	3.48321	0.000495	0/+
EFNA3	THAP9-AS1	0.621147	5.29e-05	-0.69631	0.037183	-3.4731	0.000514	#ERROR!
ACADL	THAP9-AS1	-0.1067	0.53567	0.9	0.000943	3.45636	0.000548	0/+
RFC1	THAP9-AS1	0.111197	0.518511	0.933333	0.000236	3.4403	0.000581	0/+
DLK2	THAP9-AS1	-0.10053	0.559651	0.898434	0.000994	3.42481	0.000615	0/+
LINC01474	THAP9-AS1	-0.16827	0.326602	0.883333	0.001591	3.41542	0.000637	0/+
NPAP1	THAP9-AS1	-0.16746	0.328964	0.883115	0.001601	3.41144	0.000646	0/+
ADD2	THAP9-AS1	0.308207	0.067432	-0.84428	0.004199	-3.40191	0.000669	0/-
LOC100506274	THAP9-AS1	0.230464	0.17629	-0.86603	0.002536	-3.39576	0.000684	0/-
CDK13	THAP9-AS1	0.01995	0.90806	0.916667	0.000507	3.38735	0.000706	0/+
LOC100286922	THAP9-AS1	-0.3613	0.030386	0.823558	0.006363	3.38377	0.000715	-/+
HERC6	THAP9-AS1	0.033462	0.846379	0.916667	0.000507	3.35776	0.000786	0/+
DUSP10	THAP9-AS1	-0.31737	0.059277	0.833333	0.005266	3.34332	0.000828	0/+
PTX4	THAP9-AS1	0.202493	0.236255	-0.86603	0.002536	-3.33154	0.000864	0/-
CRIP3	THAP9-AS1	-0.39943	0.015803	0.8	0.009628	3.33	0.000868	-/+
NFIB	THAP9-AS1	0.047104	0.785005	0.916667	0.000507	3.32786	0.000875	0/+
PAX8	THAP9-AS1	-0.25793	0.128812	0.85	0.003705	3.32662	0.000879	0/+
NSD3	THAP9-AS1	0.306049	0.069474	0.95	8.76e-05	3.3169	0.00091	0/+
IFT27	THAP9-AS1	0.169369	0.323392	0.933333	0.000236	3.3104	0.000932	0/+
PLEKHG7	THAP9-AS1	-0.12941	0.451925	0.881483	0.001677	3.31014	0.000932	0/+
IFIT2	THAP9-AS1	-0.11622	0.49966	0.883333	0.001591	3.29915	0.00097	0/+
RBBP8P1	THAP9-AS1	0.348159	0.037449	-0.81573	0.007348	-3.29863	0.000972	#ERROR!
GATAD1	THAP9-AS1	0.066152	0.70148	0.916667	0.000507	3.28604	0.001016	0/+
MATR3	THAP9-AS1	0.206976	0.225819	0.933333	0.000236	3.22506	0.001259	0/+
IK	THAP9-AS1	0.210039	0.218874	0.933333	0.000236	3.21806	0.001291	0/+
GDPD4	THAP9-AS1	-0.21045	0.217954	0.85	0.003705	3.21665	0.001297	0/+
BRWD1	THAP9-AS1	0.004505	0.979198	0.9	0.000943	3.2121	0.001318	0/+
RN7SKP70	THAP9-AS1	0.173591	0.311298	0.92787	0.000309	3.21159	0.00132	0/+
NFE2L1	THAP9-AS1	0.018533	0.914566	0.9	0.000943	3.1814	0.001466	0/+
ATXN2	THAP9-AS1	-0.05869	0.733848	0.883333	0.001591	3.17223	0.001513	0/+
AKAP6	THAP9-AS1	0.118677	0.490588	0.916667	0.000507	3.17007	0.001524	0/+
ANKS4B	THAP9-AS1	-0.66538	9.53e-06	0.566667	0.111633	3.1624	0.001565	-/0
INTS14	THAP9-AS1	0.033205	0.847547	0.9	0.000943	3.14926	0.001637	0/+
MIR1276	THAP9-AS1	0.476204	0.003326	-0.72457	0.027239	-3.14107	0.001683	#ERROR!
CBR1	THAP9-AS1	-0.23115	0.174979	0.833333	0.005266	3.13907	0.001695	0/+
PITX1	THAP9-AS1	0.146203	0.394854	-0.8581	0.003076	-3.13689	0.001708	0/-
MAN2C1	THAP9-AS1	0.246332	0.147545	0.933333	0.000236	3.13425	0.001723	0/+
NUGGC	THAP9-AS1	-0.22546	0.186138	0.833333	0.005266	3.12594	0.001772	0/+
BRF2	THAP9-AS1	0.140678	0.41315	0.916667	0.000507	3.12109	0.001802	0/+
MTCO1P17	THAP9-AS1	0.108525	0.528672	-0.86603	0.002536	-3.12061	0.001805	0/-
GSTA12P	THAP9-AS1	-0.37485	0.024287	0.773137	0.014549	3.11234	0.001856	-/+
HNF4A-AS1	THAP9-AS1	-0.31245	0.063558	0.8	0.009628	3.11176	0.00186	0/+
PPP4R3A	THAP9-AS1	0.074646	0.665251	0.903774	0.000827	3.10255	0.001919	0/+
CLC	THAP9-AS1	0.069805	0.685814	-0.87305	0.002115	-3.09826	0.001947	0/-
FAM99B	THAP9-AS1	-0.21044	0.217981	0.833333	0.005266	3.09143	0.001992	0/+
HNF4A	THAP9-AS1	-0.25817	0.128443	0.816667	0.007225	3.08771	0.002017	0/+
MIR1295A	THAP9-AS1	-0.27754	0.10125	0.808694	0.008316	3.08197	0.002056	0/+
ELFN1-AS1	THAP9-AS1	0.105115	0.541778	0.907595	0.000721	3.08186	0.002057	0/+
C5orf51	THAP9-AS1	-0.01583	0.926979	0.883333	0.001591	3.07829	0.002082	0/+
CA15P1	THAP9-AS1	-0.34632	0.038534	0.779849	0.01319	3.07758	0.002087	-/+
LINC02068	THAP9-AS1	-0.09461	0.583117	0.864531	0.002632	3.07682	0.002092	0/+
LRIG3	THAP9-AS1	0.0713	0.67944	0.9	0.000943	3.06565	0.002172	0/+
BROX	THAP9-AS1	0.092921	0.589872	0.903774	0.000827	3.06227	0.002197	0/+
FAM120C	THAP9-AS1	-0.07825	0.650077	0.866667	0.002495	3.0594	0.002218	0/+
PRKAB1	THAP9-AS1	-0.05946	0.730492	0.870301	0.002274	3.05044	0.002285	0/+
BRD8	THAP9-AS1	0.282111	0.095518	0.933333	0.000236	3.05006	0.002288	0/+
DROSHA	THAP9-AS1	-0.00206	0.99049	0.883333	0.001591	3.04814	0.002303	0/+
DGCR6	THAP9-AS1	-0.24122	0.156413	0.816667	0.007225	3.04813	0.002303	0/+
PSPH	THAP9-AS1	-0.28213	0.095496	0.8	0.009628	3.03897	0.002374	0/+
CLEC12A-AS1	THAP9-AS1	0.14346	0.40388	-0.84633	0.004017	-3.03659	0.002393	0/-
DAP	THAP9-AS1	-0.3565	0.032827	0.766667	0.015944	3.03121	0.002436	-/+
LOC105378721	THAP9-AS1	0.064412	0.708983	0.895405	0.001099	3.02899	0.002454	0/+
GPAM	THAP9-AS1	-0.31815	0.058627	0.783333	0.01252	3.02785	0.002463	0/+
LOC101927793	THAP9-AS1	-0.23166	0.174002	0.816667	0.007225	3.02597	0.002478	0/+
DMRTA1	THAP9-AS1	0.183281	0.284632	0.916667	0.000507	3.02533	0.002484	0/+
CYP4F3	THAP9-AS1	-0.47387	0.003506	0.7	0.03577	3.02529	0.002484	-/+
MIR4512	THAP9-AS1	-0.05993	0.728458	0.867227	0.00246	3.02404	0.002494	0/+
CYP3A7	THAP9-AS1	-0.41776	0.011237	0.733333	0.024554	3.02205	0.002511	-/+
POTEF	THAP9-AS1	0.062531	0.717129	-0.86603	0.002536	-3.0192	0.002534	0/-
LOC105377267	THAP9-AS1	-0.17583	0.30501	0.833333	0.005266	3.01274	0.002589	0/+
MORC3	THAP9-AS1	0.096782	0.574442	0.9	0.000943	3.00948	0.002617	0/+
MKRN2OS	THAP9-AS1	0.163856	0.33962	0.911465	0.000623	2.99993	0.0027	0/+
FAM76B	THAP9-AS1	0.195109	0.254143	0.916667	0.000507	2.99848	0.002713	0/+
HNF4G	THAP9-AS1	-0.11042	0.521438	0.85	0.003705	2.99175	0.002774	0/+
LRRC7	THAP9-AS1	-0.08188	0.634952	0.857173	0.003144	2.98656	0.002821	0/+
FLJ31104	THAP9-AS1	0.121723	0.479441	0.902332	0.00087	2.9814	0.002869	0/+
MLIP-IT1	THAP9-AS1	-0.36975	0.026451	0.749106	0.020174	2.97428	0.002937	-/+
GOLGA2P5	THAP9-AS1	-0.03681	0.831228	0.866667	0.002495	2.96839	0.002994	0/+
CLDN16	THAP9-AS1	0.047362	0.783858	0.883333	0.001591	2.93991	0.003283	0/+
MED26	THAP9-AS1	0.357423	0.032345	0.937247	0.000192	2.93473	0.003338	#ERROR!
MLLT10	THAP9-AS1	0.22471	0.187636	0.916667	0.000507	2.9307	0.003382	0/+
LOC100420580	THAP9-AS1	-0.1805	0.292119	0.819892	0.006812	2.93038	0.003385	0/+
ASH1L	THAP9-AS1	0.110425	0.521438	0.895405	0.001099	2.9275	0.003417	0/+
RCOR3	THAP9-AS1	0.228071	0.180947	0.916667	0.000507	2.92295	0.003467	0/+
PECR	THAP9-AS1	-0.27362	0.106366	0.783333	0.01252	2.92102	0.003489	0/+
RBFOX2	THAP9-AS1	0.057915	0.737241	0.883333	0.001591	2.91675	0.003537	0/+
MRPL10	THAP9-AS1	0.07619	0.658741	0.887037	0.001426	2.91402	0.003568	0/+
PDCD7	THAP9-AS1	0.14043	0.413984	0.9	0.000943	2.91258	0.003585	0/+
HSPBP1	THAP9-AS1	0.062424	0.717594	0.883333	0.001591	2.90685	0.003651	0/+
CNKSR3	THAP9-AS1	-0.12793	0.457154	0.833333	0.005266	2.90542	0.003668	0/+
MZF1-AS1	THAP9-AS1	-0.000129	0.999406	0.866667	0.002495	2.88808	0.003876	0/+
MTCYBP21	THAP9-AS1	-0.223	0.191103	0.794986	0.010445	2.87055	0.004098	0/+
KLB	THAP9-AS1	-0.32606	0.052293	0.75	0.019942	2.86993	0.004106	0/+
BCAR4	THAP9-AS1	-0.33163	0.048172	0.745356	0.021164	2.86054	0.004229	-/+
LOC100421336	THAP9-AS1	0.499991	0.001902	-0.63901	0.063924	-2.85773	0.004267	#ERROR!
BHMT	THAP9-AS1	-0.5057	0.001654	0.633333	0.067086	2.85359	0.004323	-/0
MED23	THAP9-AS1	0.087259	0.612827	0.883333	0.001591	2.85218	0.004342	0/+
HGFAC	THAP9-AS1	-0.14995	0.382703	0.816667	0.007225	2.84029	0.004507	0/+
GSTA5	THAP9-AS1	-0.05283	0.759584	0.846327	0.004017	2.83618	0.004566	0/+
AKR7A3	THAP9-AS1	-0.4294	0.008963	0.683333	0.042442	2.83302	0.004611	-/+
DZIP3	THAP9-AS1	0.09666	0.574928	0.883333	0.001591	2.83143	0.004634	0/+
GLCCI1	THAP9-AS1	0.269498	0.11195	0.916667	0.000507	2.82629	0.004709	0/+
KRT39	THAP9-AS1	-0.30299	0.072453	0.752325	0.019348	2.82557	0.00472	0/+
CEP85L	THAP9-AS1	0.271721	0.108909	0.916667	0.000507	2.82104	0.004787	0/+
PKN2	THAP9-AS1	-0.0888	0.606529	0.833333	0.005266	2.81876	0.004821	0/+
GACAT2	THAP9-AS1	-0.20197	0.237488	0.794198	0.010577	2.81767	0.004837	0/+
MPV17L	THAP9-AS1	-0.1861	0.277159	0.8	0.009628	2.8164	0.004857	0/+
GSTA2	THAP9-AS1	-0.4473	0.006233	0.666667	0.049867	2.81451	0.004885	-/+
CASP8AP2	THAP9-AS1	0.106306	0.537182	0.883333	0.001591	2.8101	0.004953	0/+
NUP210L	THAP9-AS1	0.288235	0.088237	-0.75571	0.018506	-2.80734	0.004995	0/-
KAT7	THAP9-AS1	0.277992	0.100667	0.916667	0.000507	2.80619	0.005013	0/+
MED4	THAP9-AS1	0.278764	0.099686	0.916667	0.000507	2.80436	0.005042	0/+
HEXIM1	THAP9-AS1	-0.13308	0.439092	0.816667	0.007225	2.80259	0.005069	0/+
FAM99A	THAP9-AS1	-0.26197	0.122716	0.766667	0.015944	2.8022	0.005076	0/+
MT1JP	THAP9-AS1	0.081021	0.63854	-0.83333	0.005266	-2.80161	0.005085	0/-
CFAP58	THAP9-AS1	0.344206	0.039817	-0.7258	0.026852	-2.79832	0.005137	#ERROR!
EMSY	THAP9-AS1	0.256113	0.131626	0.912142	0.000607	2.79731	0.005153	0/+
NANOGP6	THAP9-AS1	-0.03191	0.853428	0.846327	0.004017	2.79031	0.005266	0/+
FGF21	THAP9-AS1	-0.21745	0.202679	0.783333	0.01252	2.79016	0.005268	0/+
AMACR	THAP9-AS1	-0.54775	0.000545	0.577411	0.103507	2.78756	0.005311	-/0
C6orf99	THAP9-AS1	-0.05649	0.743499	0.836827	0.004907	2.77292	0.005556	0/+
FAM167B	THAP9-AS1	0.259202	0.126873	-0.76151	0.017117	-2.76859	0.00563	0/-
LHX9	THAP9-AS1	-0.10671	0.535636	0.820091	0.006788	2.76673	0.005662	0/+
GGA3	THAP9-AS1	0.205148	0.230036	0.9	0.000943	2.76653	0.005666	0/+
FAM43A	THAP9-AS1	0.375338	0.024087	-0.7	0.03577	-2.76172	0.00575	#ERROR!
RECQL5	THAP9-AS1	0.057658	0.738368	0.866667	0.002495	2.76147	0.005754	0/+
LOC101929626	THAP9-AS1	-0.29026	0.085929	0.745356	0.021164	2.7603	0.005775	0/+
METRNL	THAP9-AS1	0.243758	0.151959	-0.76667	0.015944	-2.75961	0.005787	0/-
LRRC37A15P	THAP9-AS1	0.284517	0.092605	0.914337	0.000557	2.75918	0.005795	0/+
RBBP6	THAP9-AS1	0.210811	0.217146	0.9	0.000943	2.75358	0.005895	0/+
RALGDS	THAP9-AS1	0.623166	4.92e-05	-0.48333	0.18747	-2.75202	0.005923	#ERROR!
HTD2	THAP9-AS1	-0.10715	0.533947	0.816922	0.007192	2.74669	0.00602	0/+
LOC100507389	THAP9-AS1	-0.27436	0.105385	0.75	0.019942	2.74553	0.006041	0/+
DNAAF2	THAP9-AS1	0.217246	0.203111	0.9	0.000943	2.73882	0.006166	0/+
LOC284379	THAP9-AS1	0.319817	0.057242	-0.72457	0.027239	-2.73265	0.006283	0/-
NHSL1	THAP9-AS1	-0.10064	0.559196	0.816667	0.007225	2.73062	0.006321	0/+
MLXIPL	THAP9-AS1	-0.2677	0.114461	0.75	0.019942	2.7298	0.006337	0/+
MRPL50	THAP9-AS1	0.310167	0.065618	0.916667	0.000507	2.7291	0.006351	0/+
CHERP	THAP9-AS1	0.072587	0.673969	0.866667	0.002495	2.72866	0.006359	0/+
CGGBP1	THAP9-AS1	0.145431	0.397383	0.883333	0.001591	2.72309	0.006467	0/+
ATF7IP2	THAP9-AS1	0.076963	0.655495	0.866667	0.002495	2.71903	0.006547	0/+
BNIP3P42	THAP9-AS1	0.083356	0.628864	0.867227	0.00246	2.70989	0.006731	0/+
PLGLA	THAP9-AS1	-0.13469	0.43351	0.8	0.009628	2.70089	0.006915	0/+
RAP2C	THAP9-AS1	-0.08649	0.615986	0.816667	0.007225	2.69936	0.006947	0/+
LSM14A	THAP9-AS1	0.086486	0.615986	0.866667	0.002495	2.69804	0.006975	0/+
DCDC1	THAP9-AS1	0.009268	0.957216	0.845196	0.004117	2.69147	0.007114	0/+
NR1H4	THAP9-AS1	-0.42548	0.00968	0.65	0.058073	2.69113	0.007121	-/0
KIAA1586	THAP9-AS1	-0.03025	0.860972	0.833333	0.005266	2.69013	0.007143	0/+
NR2C1	THAP9-AS1	0.161143	0.347787	0.883333	0.001591	2.68788	0.007191	0/+
IGKV1-17	THAP9-AS1	0.212262	0.213925	-0.76667	0.015944	-2.68689	0.007212	0/-
LINC01978	THAP9-AS1	0.065259	0.705326	0.859769	0.002956	2.68553	0.007242	0/+
IL27	THAP9-AS1	-0.31478	0.061502	0.716667	0.029818	2.68442	0.007266	0/+
ONECUT2	THAP9-AS1	-0.17091	0.318935	0.783333	0.01252	2.6843	0.007268	0/+
RNU6-1005P	THAP9-AS1	0.062416	0.717629	-0.82158	0.006603	-2.6791	0.007382	0/-
LOC105369201	THAP9-AS1	0.281373	0.096426	-0.73271	0.024739	-2.67813	0.007404	0/-
OR10V2P	THAP9-AS1	0.060896	0.724231	-0.82158	0.006603	-2.67576	0.007456	0/-
RANBP9	THAP9-AS1	0.332046	0.047872	0.916667	0.000507	2.67571	0.007457	#ERROR!
ERBB3	THAP9-AS1	-0.02342	0.892138	0.833333	0.005266	2.67517	0.007469	0/+
HELZ	THAP9-AS1	-0.12201	0.478408	0.8	0.009628	2.67267	0.007525	0/+
PEX12	THAP9-AS1	0.036296	0.833544	0.85	0.003705	2.66963	0.007594	0/+
CYP7A1	THAP9-AS1	-0.27431	0.105446	0.733333	0.024554	2.66433	0.007714	0/+
PRRG1	THAP9-AS1	0.039385	0.819602	0.85	0.003705	2.66286	0.007748	0/+
EED	THAP9-AS1	0.313019	0.063048	0.912142	0.000607	2.66174	0.007774	0/+
CMA1	THAP9-AS1	0.018829	0.913206	-0.83196	0.005411	-2.65533	0.007923	0/-
BIN1	THAP9-AS1	-0.1982	0.246554	0.766667	0.015944	2.65476	0.007937	0/+
GPBP1	THAP9-AS1	0.438867	0.007414	0.933333	0.000236	2.65426	0.007948	#ERROR!
CCDC58	THAP9-AS1	0.106821	0.535201	0.866667	0.002495	2.65312	0.007975	0/+
ATG4C	THAP9-AS1	0.106821	0.535201	0.866667	0.002495	2.65312	0.007975	0/+
CBFA2T3	THAP9-AS1	-0.15654	0.361911	0.783333	0.01252	2.65198	0.008002	0/+
MRM1	THAP9-AS1	0.089195	0.604936	0.861932	0.002806	2.65111	0.008023	0/+
METTL7A	THAP9-AS1	-0.30028	0.075175	0.716667	0.029818	2.64936	0.008064	0/+
IQCN	THAP9-AS1	-0.19528	0.253731	0.766667	0.015944	2.64811	0.008094	0/+
PROK1	THAP9-AS1	0.13194	0.443045	0.872082	0.00217	2.64589	0.008148	0/+
C22orf46	THAP9-AS1	-0.15291	0.373301	0.783333	0.01252	2.64383	0.008197	0/+
PAXIP1	THAP9-AS1	0.111075	0.518971	0.866667	0.002495	2.6437	0.008201	0/+
CROCCP1	THAP9-AS1	-0.28238	0.095192	0.724569	0.027239	2.64253	0.008229	0/+
ATG10	THAP9-AS1	0.181479	0.289476	0.883333	0.001591	2.64202	0.008241	0/+
CEP20	THAP9-AS1	0.04981	0.77297	0.85	0.003705	2.64	0.008291	0/+
KRTAP5-2	THAP9-AS1	-0.2804	0.09763	0.724569	0.027239	2.63784	0.008344	0/+
LINC01146	THAP9-AS1	-0.14809	0.388713	0.783333	0.01252	2.63305	0.008462	0/+
H4C8	THAP9-AS1	-0.0605	0.725935	0.815155	0.007424	2.63229	0.008481	0/+
GTF2A1	THAP9-AS1	-0.00348	0.983952	0.833333	0.005266	2.63151	0.008501	0/+
EXOC3	THAP9-AS1	-0.14634	0.394403	0.783333	0.01252	2.62914	0.00856	0/+
EP300	THAP9-AS1	-0.05431	0.753065	0.816667	0.007225	2.62859	0.008574	0/+
DNA2	THAP9-AS1	-0.05431	0.753065	0.816667	0.007225	2.62859	0.008574	0/+
ATP6AP1L	THAP9-AS1	0.372892	0.025099	0.92051	0.000431	2.62747	0.008602	#ERROR!
GRB10	THAP9-AS1	-0.1009	0.558187	0.8	0.009628	2.62589	0.008642	0/+
PRPF31	THAP9-AS1	0.056885	0.741752	0.85	0.003705	2.62447	0.008678	0/+
MOGAT3	THAP9-AS1	-0.37493	0.024255	0.666667	0.049867	2.62372	0.008698	-/+
ANXA4	THAP9-AS1	-0.18327	0.284664	0.766667	0.015944	2.62085	0.008771	0/+
MTIF2	THAP9-AS1	-0.09653	0.575465	0.8	0.009628	2.61622	0.008891	0/+
PUM1	THAP9-AS1	0.126126	0.463568	0.866667	0.002495	2.61029	0.009047	0/+
LINC01063	THAP9-AS1	-0.08091	0.63901	0.804422	0.008944	2.60892	0.009083	0/+
NFYC	THAP9-AS1	-0.0453	0.793047	0.816667	0.007225	2.60883	0.009085	0/+
PATZ1	THAP9-AS1	0.273102	0.107052	0.9	0.000943	2.60871	0.009088	0/+
KRT73	THAP9-AS1	-0.29817	0.077347	0.707475	0.033013	2.60348	0.009228	0/+
RBM28	THAP9-AS1	0.199228	0.244058	0.883333	0.001591	2.60172	0.009276	0/+
PMS2P4	THAP9-AS1	-0.21667	0.204336	0.747926	0.020482	2.6008	0.009301	0/+
CHRM5	THAP9-AS1	0.043785	0.799837	0.842744	0.004338	2.59722	0.009398	0/+
PURA	THAP9-AS1	0.133333	0.438199	0.866667	0.002495	2.59424	0.00948	0/+
CNOT3	THAP9-AS1	0.070785	0.681632	0.85	0.003705	2.59392	0.009489	0/+
CPSF1P1	THAP9-AS1	-0.09983	0.562383	0.794986	0.010445	2.59339	0.009504	0/+
EXPH5	THAP9-AS1	0.071176	0.679968	0.85	0.003705	2.59306	0.009513	0/+
KAT8	THAP9-AS1	0.461261	0.004633	0.933333	0.000236	2.5928	0.00952	#ERROR!
MTND6P21	THAP9-AS1	-0.16035	0.350194	0.769881	0.01524	2.58634	0.0097	0/+
CTDSPL2	THAP9-AS1	0.283398	0.093951	0.9	0.000943	2.58429	0.009758	0/+
ARID2	THAP9-AS1	0.137847	0.42271	0.866667	0.002495	2.58418	0.009761	0/+
ACTL6B	THAP9-AS1	0.054985	0.750101	-0.80946	0.008207	-2.58354	0.009779	0/-
KARS1P1	THAP9-AS1	-0.01841	0.915125	0.821584	0.006603	2.58262	0.009805	0/+
PLBD2	THAP9-AS1	-0.30245	0.072992	0.7	0.03577	2.58136	0.009841	0/+
RHOG	THAP9-AS1	0.165766	0.333944	-0.76667	0.015944	-2.58134	0.009842	0/-
CPS1	THAP9-AS1	-0.16566	0.334262	0.766667	0.015944	2.5811	0.009849	0/+
CYP2B6	THAP9-AS1	-0.49051	0.002388	0.566667	0.111633	2.58096	0.009852	-/0
LOC102724064	THAP9-AS1	-0.30903	0.066667	0.694567	0.037864	2.57411	0.01005	0/+
LINC01687	THAP9-AS1	-0.36162	0.03023	0.661094	0.052523	2.56821	0.010223	-/0
PACC1	THAP9-AS1	0.132956	0.439509	0.861932	0.002806	2.55413	0.010645	0/+
LOC100420011	THAP9-AS1	-0.23301	0.171428	0.730297	0.025464	2.5534	0.010668	0/+
DCLRE1A	THAP9-AS1	-0.06706	0.697586	0.8	0.009628	2.55129	0.010732	0/+
PPP4R3B	THAP9-AS1	0.033205	0.847547	0.833333	0.005266	2.55121	0.010735	0/+
GPATCH8	THAP9-AS1	0.090347	0.600259	0.85	0.003705	2.55083	0.010747	0/+
PGM5P4-AS1	THAP9-AS1	0.302124	0.073312	-0.69282	0.038554	-2.55008	0.01077	0/-
NECAB2	THAP9-AS1	-0.25781	0.129003	0.716667	0.029818	2.54855	0.010817	0/+
FAM234B	THAP9-AS1	0.092284	0.592438	0.85	0.003705	2.54656	0.010879	0/+
C4orf17	THAP9-AS1	-0.22817	0.180744	0.730297	0.025464	2.54222	0.011015	0/+
NASP	THAP9-AS1	0.157014	0.36044	0.866667	0.002495	2.5413	0.011044	0/+
ABCG5	THAP9-AS1	-0.34205	0.041161	0.666667	0.049867	2.54114	0.011049	-/+
CEP295	THAP9-AS1	0.037969	0.825986	0.833333	0.005266	2.54077	0.011061	0/+
LOC100506302	THAP9-AS1	-0.10656	0.536191	0.783333	0.01252	2.54066	0.011064	0/+
PRODH	THAP9-AS1	-0.31366	0.062479	0.683333	0.042442	2.53854	0.011132	0/+
IFITM1	THAP9-AS1	0.21982	0.197678	-0.73333	0.024554	-2.53728	0.011172	0/-
LINC02206	THAP9-AS1	0.1671	0.330013	-0.75698	0.018196	-2.53381	0.011283	0/-
FBRSL1	THAP9-AS1	0.305277	0.070216	0.9	0.000943	2.53186	0.011346	0/+
NSD1	THAP9-AS1	0.16139	0.347038	0.866667	0.002495	2.53148	0.011358	0/+
CMBL	THAP9-AS1	-0.14234	0.40759	0.766667	0.015944	2.52883	0.011444	0/+
LINC00893	THAP9-AS1	0.324902	0.053183	0.903774	0.000827	2.52844	0.011457	0/+
PCF11	THAP9-AS1	0.231403	0.174485	0.883333	0.001591	2.52787	0.011476	0/+
LOC283194	THAP9-AS1	-0.18452	0.28132	0.747926	0.020482	2.52749	0.011488	0/+
RAB2B	THAP9-AS1	0.286486	0.090271	0.895405	0.001099	2.52513	0.011566	0/+
MIR339	THAP9-AS1	-0.22045	0.196362	0.730297	0.025464	2.52442	0.011589	0/+
ANAPC7	THAP9-AS1	0.213127	0.212019	0.878669	0.001816	2.52433	0.011592	0/+
HSPA2	THAP9-AS1	0.152124	0.375779	-0.76151	0.017117	-2.52361	0.011616	0/-
EEF1A1P8	THAP9-AS1	0.098687	0.5669	-0.78335	0.012517	-2.52332	0.011625	0/-
HBA2	THAP9-AS1	-0.1398	0.416118	0.766667	0.015944	2.52314	0.011631	0/+
CRPP1	THAP9-AS1	-0.10808	0.530372	-0.85126	0.003602	-2.52158	0.011683	0/-
AKR1C8P	THAP9-AS1	-0.27517	0.104315	0.7	0.03577	2.51623	0.011862	0/+
FMR1	THAP9-AS1	0.107336	0.533225	0.85	0.003705	2.51328	0.011961	0/+
KRTAP10-4	THAP9-AS1	-0.26692	0.115551	0.703005	0.034644	2.5097	0.012083	0/+
NBR1	THAP9-AS1	0	1	0.816667	0.007225	2.50962	0.012086	0/+
RIDA	THAP9-AS1	-0.30142	0.074022	0.683333	0.042442	2.50894	0.012109	0/+
C19orf54	THAP9-AS1	0.10991	0.523393	0.85	0.003705	2.50758	0.012156	0/+
DKK4	THAP9-AS1	0.183866	0.283072	-0.74383	0.021575	-2.50581	0.012217	0/-
KANSL1L	THAP9-AS1	-0.04633	0.788449	0.8	0.009628	2.50579	0.012218	0/+
FZD3	THAP9-AS1	0.242101	0.154851	0.883333	0.001591	2.50307	0.012312	0/+
LIPT2	THAP9-AS1	-0.05844	0.73494	0.794986	0.010445	2.50222	0.012342	0/+
AKR1B10	THAP9-AS1	-0.30734	0.06825	0.67783	0.044809	2.50078	0.012392	0/+
ALG14	THAP9-AS1	-0.26797	0.114076	0.7	0.03577	2.49922	0.012447	0/+
BMERB1	THAP9-AS1	0.176062	0.304354	0.866667	0.002495	2.49843	0.012475	0/+
CRYGN	THAP9-AS1	0.076631	0.656888	0.839146	0.004678	2.49818	0.012483	0/+
DDN-AS1	THAP9-AS1	0.392503	0.017894	-0.62106	0.074253	-2.49814	0.012485	#ERROR!
DBH-AS1	THAP9-AS1	-0.16603	0.333152	0.75	0.019942	2.49608	0.012558	0/+
IQCH-AS1	THAP9-AS1	0.059077	0.732161	0.833333	0.005266	2.49446	0.012615	0/+
DNMBP-AS1	THAP9-AS1	0.007986	0.963132	0.816667	0.007225	2.49214	0.012698	0/+
MAP3K13	THAP9-AS1	0.118147	0.492541	0.85	0.003705	2.48932	0.012799	0/+
OR2C1	THAP9-AS1	-0.09471	0.582693	-0.84327	0.00429	-2.48921	0.012803	0/-
BTF3L4	THAP9-AS1	0.009524	0.956037	0.816667	0.007225	2.48877	0.012819	0/+
NCMAP	THAP9-AS1	0.180695	0.291599	0.866667	0.002495	2.48795	0.012848	0/+
ALKBH2	THAP9-AS1	0.180835	0.291218	0.866667	0.002495	2.48763	0.01286	0/+
MGC27382	THAP9-AS1	-0.12378	0.471975	0.766667	0.015944	2.48748	0.012865	0/+
GM2A	THAP9-AS1	0.062295	0.718152	0.833333	0.005266	2.48739	0.012868	0/+
C19orf44	THAP9-AS1	0.119691	0.486862	0.85	0.003705	2.48589	0.012923	0/+
LINC00449	THAP9-AS1	0.001682	0.992232	0.813166	0.007691	2.48312	0.013024	0/+
FAH	THAP9-AS1	-0.55598	0.00043	0.466667	0.205386	2.47914	0.01317	-/0
LOC400499	THAP9-AS1	-0.000386	0.998216	0.811723	0.007889	2.47836	0.013199	0/+
LINC00671	THAP9-AS1	0.001416	0.99346	0.811723	0.007889	2.47442	0.013345	0/+
HOXD4	THAP9-AS1	0.198151	0.246668	-0.7303	0.025464	-2.47338	0.013384	0/-
CYP3A5	THAP9-AS1	-0.19151	0.263192	0.733333	0.024554	2.47257	0.013414	0/+
PBLD	THAP9-AS1	-0.41055	0.012878	0.6	0.087623	2.47175	0.013445	-/0
CBR3	THAP9-AS1	0.297979	0.077543	-0.67544	0.045865	-2.46857	0.013565	0/-
CHD6	THAP9-AS1	0.256885	0.130425	0.883333	0.001591	2.46856	0.013566	0/+
MRNIP	THAP9-AS1	0.414414	0.011975	0.916667	0.000507	2.46604	0.013661	#ERROR!
LOC101928495	THAP9-AS1	-0.20595	0.228176	0.724569	0.027239	2.46456	0.013718	0/+
LINC02499	THAP9-AS1	-0.22024	0.196794	0.716667	0.029818	2.46134	0.013842	0/+
LOC100419515	THAP9-AS1	0.289413	0.086888	0.889946	0.001305	2.45931	0.01392	0/+
ISCU	THAP9-AS1	-0.06924	0.688225	0.783333	0.01252	2.45833	0.013959	0/+
HMGB1P43	THAP9-AS1	-0.14884	0.386287	0.75	0.019942	2.45749	0.013991	0/+
RAB25	THAP9-AS1	0.132819	0.439986	0.85	0.003705	2.45669	0.014022	0/+
LINC02175	THAP9-AS1	0.206519	0.226869	0.869268	0.002335	2.45231	0.014194	0/+
CPVL	THAP9-AS1	0.182239	0.287425	-0.73333	0.024554	-2.45156	0.014224	0/-
MBLAC2	THAP9-AS1	0.0793	0.645709	0.833333	0.005266	2.44999	0.014286	0/+
FHL1	THAP9-AS1	0.276705	0.102318	-0.68333	0.042442	-2.44992	0.014289	0/-
ERAS	THAP9-AS1	-0.0862	0.617165	0.775058	0.014151	2.44956	0.014303	0/+
LOC100419615	THAP9-AS1	-0.18712	0.274489	0.730297	0.025464	2.44831	0.014353	0/+
CTRC	THAP9-AS1	0.372279	0.025358	-0.62106	0.074253	-2.4463	0.014433	#ERROR!
PPARGC1B	THAP9-AS1	-0.10516	0.541598	0.766667	0.015944	2.44618	0.014438	0/+
DDI2	THAP9-AS1	0.029346	0.865092	0.816667	0.007225	2.44537	0.01447	0/+
INKA2-AS1	THAP9-AS1	-0.01357	0.937368	0.801784	0.009348	2.44491	0.014489	0/+
HES5	THAP9-AS1	0.005313	0.975468	-0.80442	0.008944	-2.44309	0.014562	0/-
RNU6-1098P	THAP9-AS1	0.00144	0.993347	0.806779	0.008594	2.44301	0.014565	0/+
KANSL1	THAP9-AS1	0.139768	0.416209	0.85	0.003705	2.4412	0.014639	0/+
CXXC1	THAP9-AS1	0.423938	0.009976	0.916667	0.000507	2.44076	0.014656	#ERROR!
KCNJ4	THAP9-AS1	-0.52829	0.000927	0.483333	0.18747	2.44039	0.014671	-/0
FCMR	THAP9-AS1	0.175615	0.305603	-0.73333	0.024554	-2.43658	0.014827	0/-
MED6	THAP9-AS1	0.034623	0.841118	0.816667	0.007225	2.43381	0.014941	0/+
AMZ2	THAP9-AS1	0.035006	0.839379	0.816667	0.007225	2.43297	0.014975	0/+
FPGT	THAP9-AS1	-0.13642	0.427565	0.75	0.019942	2.42975	0.015109	0/+
PPP1R21	THAP9-AS1	0.037323	0.828902	0.816667	0.007225	2.4279	0.015187	0/+
LPP	THAP9-AS1	0.089575	0.603391	0.833333	0.005266	2.42734	0.01521	0/+
MIS12	THAP9-AS1	0.275161	0.104327	0.883333	0.001591	2.42552	0.015287	0/+
GPBP1L1	THAP9-AS1	0.039125	0.820773	0.816667	0.007225	2.42395	0.015353	0/+
PAGR1	THAP9-AS1	0.201055	0.23967	0.864531	0.002632	2.42306	0.01539	0/+
ACVR1	THAP9-AS1	-0.2018	0.237893	0.716667	0.029818	2.4191	0.015559	0/+
NHEJ1	THAP9-AS1	0.05189	0.763756	0.820091	0.006788	2.41864	0.015578	0/+
CDKN2AIPNL	THAP9-AS1	-0.09164	0.595032	0.766667	0.015944	2.4163	0.015679	0/+
ARHGEF38-IT1	THAP9-AS1	-0.21836	0.200737	0.707475	0.033013	2.41621	0.015683	0/+
C1RL-AS1	THAP9-AS1	0.212511	0.213374	0.866667	0.002495	2.41552	0.015713	0/+
ARG1	THAP9-AS1	-0.16615	0.332805	0.733333	0.024554	2.41525	0.015724	0/+
MKRN1	THAP9-AS1	0.213642	0.210891	0.866667	0.002495	2.41292	0.015825	0/+
MED28P3	THAP9-AS1	-0.0168	0.922522	0.795133	0.01042	2.41182	0.015873	0/+
PVALEF	THAP9-AS1	-0.18156	0.28927	0.724569	0.027239	2.40908	0.015993	0/+
PDZK1	THAP9-AS1	-0.339	0.043122	0.633333	0.067086	2.40718	0.016076	-/0
CDCA2	THAP9-AS1	0.193474	0.258225	-0.71818	0.029311	-2.40698	0.016085	0/-
KIF27	THAP9-AS1	0.356099	0.033038	0.9	0.000943	2.40693	0.016087	#ERROR!
LOC102723544	THAP9-AS1	-0.04521	0.793442	0.783156	0.012553	2.40457	0.016192	0/+
PAQR9-AS1	THAP9-AS1	-0.22696	0.183141	0.7	0.03577	2.4036	0.016235	0/+
RNA5SP187	THAP9-AS1	-0.3288	0.05023	0.63901	0.063924	2.40293	0.016264	0/0
PKLR	THAP9-AS1	-0.61231	7.22e-05	0.366667	0.33174	2.40116	0.016343	-/0
PROX1	THAP9-AS1	0.001802	0.991679	0.8	0.009628	2.40037	0.016378	0/+
KLF15	THAP9-AS1	-0.15676	0.361238	0.733333	0.024554	2.39414	0.016659	0/+
KLC2	THAP9-AS1	0.160886	0.348568	0.85	0.003705	2.39391	0.01667	0/+
AKR7A2	THAP9-AS1	-0.19024	0.266412	0.716667	0.029818	2.3928	0.016721	0/+
GMCL1	THAP9-AS1	-0.11918	0.488723	0.75	0.019942	2.3914	0.016784	0/+
ADCY6-DT	THAP9-AS1	-0.25819	0.128411	0.678064	0.044707	2.3848	0.017089	0/+
HPS4	THAP9-AS1	0.226255	0.184541	0.866667	0.002495	2.38392	0.01713	0/+
FAM157A	THAP9-AS1	0.170103	0.321269	-0.72457	0.027239	-2.38322	0.017162	0/-
LINC00163	THAP9-AS1	0.441088	0.007086	-0.54772	0.12687	-2.38263	0.017189	#ERROR!
RBM26	THAP9-AS1	0.345325	0.039135	0.895405	0.001099	2.38202	0.017218	#ERROR!
LINC02487	THAP9-AS1	0.192701	0.260167	0.857173	0.003144	2.37988	0.017318	0/+
FTH1	THAP9-AS1	-0.18353	0.283976	0.716667	0.029818	2.37756	0.017427	0/+
ELP5	THAP9-AS1	0.229086	0.178961	0.866667	0.002495	2.37738	0.017436	0/+
C12orf45	THAP9-AS1	-0.03218	0.852212	0.783333	0.01252	2.37699	0.017454	0/+
LINC01814	THAP9-AS1	-0.11263	0.513085	0.75	0.019942	2.37687	0.01746	0/+
IFIT5	THAP9-AS1	0.046847	0.786153	0.811723	0.007889	2.37492	0.017553	0/+
LINC00960	THAP9-AS1	0.369197	0.026695	0.9	0.000943	2.37393	0.0176	#ERROR!
LRRFIP2	THAP9-AS1	0.114286	0.506886	0.833333	0.005266	2.37269	0.017659	0/+
LHX4	THAP9-AS1	0.110324	0.521818	0.831962	0.005411	2.37168	0.017707	0/+
PHAX	THAP9-AS1	-0.02934	0.865101	0.783333	0.01252	2.37079	0.01775	0/+
HMGB1P5	THAP9-AS1	0.279169	0.099175	0.878669	0.001816	2.37041	0.017769	0/+
GOLPH3L	THAP9-AS1	0.171686	0.31672	0.85	0.003705	2.3696	0.017807	0/+
IKZF5	THAP9-AS1	0.298842	0.076647	0.883333	0.001591	2.36904	0.017834	0/+
C21orf58	THAP9-AS1	0.042345	0.806291	0.808694	0.008316	2.36549	0.018006	0/+
LOC101928590	THAP9-AS1	0.149958	0.382693	-0.7303	0.025464	-2.36459	0.01805	0/-
LRRC37A	THAP9-AS1	0.125692	0.46512	0.83551	0.00504	2.36305	0.018125	0/+
KPNB1	THAP9-AS1	0.068211	0.692634	0.816667	0.007225	2.3601	0.01827	0/+
HBQ1	THAP9-AS1	-0.0656	0.70386	0.766812	0.015912	2.35972	0.018289	0/+
PPT2	THAP9-AS1	0.16036	0.350164	0.845196	0.004117	2.35775	0.018386	0/+
DDX58	THAP9-AS1	-0.02162	0.900392	0.783333	0.01252	2.35388	0.018579	0/+
NRDE2	THAP9-AS1	0.02471	0.886249	0.8	0.009628	2.35023	0.018762	0/+
PES1	THAP9-AS1	0.024968	0.885072	0.8	0.009628	2.34966	0.01879	0/+
IYD	THAP9-AS1	-0.42548	0.00968	0.55	0.124977	2.34772	0.018889	-/0
CSPP1	THAP9-AS1	0.073874	0.668515	0.816667	0.007225	2.34765	0.018892	0/+
MIR101-2	THAP9-AS1	-0.08253	0.632289	0.75724	0.018132	2.34702	0.018924	0/+
IGKV1-27	THAP9-AS1	0.167848	0.327823	-0.71667	0.029818	-2.34216	0.019173	0/-
NCKAP5	THAP9-AS1	-0.19974	0.242817	0.7	0.03577	2.34118	0.019223	0/+
RNU6-1136P	THAP9-AS1	0.212982	0.212339	-0.69282	0.038554	-2.34094	0.019235	0/-
LRP1B	THAP9-AS1	-0.28114	0.096714	0.652725	0.056677	2.3394	0.019315	0/0
CYP2C9	THAP9-AS1	-0.2852	0.091791	0.65	0.058073	2.33871	0.019351	0/0
PPIL4	THAP9-AS1	0.12973	0.450787	0.833333	0.005266	2.33838	0.019368	0/+
KDM4E	THAP9-AS1	-0.1375	0.423874	0.730297	0.025464	2.33676	0.019452	0/+
LRIG2	THAP9-AS1	0.079279	0.645794	0.816667	0.007225	2.33575	0.019504	0/+
FGF12	THAP9-AS1	-0.22265	0.191819	0.686198	0.041242	2.33553	0.019516	0/+
BNIP3	THAP9-AS1	-0.05328	0.757605	0.766667	0.015944	2.3319	0.019706	0/+
FRMD6-AS1	THAP9-AS1	0.282606	0.094913	-0.64979	0.058183	-2.33172	0.019715	0/0
EIF4A1P4	THAP9-AS1	0.360877	0.030595	-0.59636	0.090077	-2.33156	0.019724	#ERROR!
ARL14EPP1	THAP9-AS1	0.144181	0.401497	0.83666	0.004924	2.33019	0.019796	0/+
CHD8	THAP9-AS1	0.133848	0.436417	0.833333	0.005266	2.32921	0.019848	0/+
POLR3A	THAP9-AS1	0.250193	0.141101	0.866667	0.002495	2.32837	0.019892	0/+
LINC01044	THAP9-AS1	-0.14008	0.415153	0.727097	0.026445	2.32759	0.019934	0/+
FAM227B	THAP9-AS1	0.190256	0.266381	0.85	0.003705	2.32759	0.019934	0/+
LOC100507291	THAP9-AS1	0.182286	0.287299	0.847579	0.003909	2.3267	0.019981	0/+
GIPC2	THAP9-AS1	0.08417	0.625505	0.816667	0.007225	2.32497	0.020073	0/+
LOC101929773	THAP9-AS1	-0.39601	0.016809	0.566667	0.111633	2.32311	0.020173	-/0
C16orf70	THAP9-AS1	0.037323	0.828902	0.8	0.009628	2.3226	0.020201	0/+
COIL	THAP9-AS1	0.137194	0.424929	0.833333	0.005266	2.32175	0.020247	0/+
CCDC40	THAP9-AS1	0.085725	0.619107	0.816667	0.007225	2.32154	0.020258	0/+
RBM5	THAP9-AS1	0.467696	0.004024	0.916667	0.000507	2.32119	0.020276	#ERROR!
IQUB	THAP9-AS1	0.241581	0.155766	0.863532	0.002698	2.32116	0.020278	0/+
RAVER1	THAP9-AS1	-0.04788	0.781565	0.766667	0.015944	2.32004	0.020339	0/+
LTC4S	THAP9-AS1	-0.02787	0.871832	0.774597	0.014246	2.31892	0.020399	0/+
C10orf71	THAP9-AS1	0.088662	0.607103	0.816922	0.007192	2.31674	0.020518	0/+
PTPRQ	THAP9-AS1	-0.12651	0.462197	0.731118	0.025215	2.31613	0.020551	0/+
PCYT2	THAP9-AS1	-0.27568	0.103654	0.65	0.058073	2.31608	0.020554	0/0
LOC400627	THAP9-AS1	-0.07261	0.673878	0.755433	0.018573	2.31593	0.020562	0/+
LCLAT1	THAP9-AS1	-0.156	0.363575	0.716667	0.029818	2.31554	0.020583	0/+
LARP1	THAP9-AS1	0.124839	0.468179	0.828459	0.005795	2.3148	0.020624	0/+
LINC02430	THAP9-AS1	-0.1395	0.417117	0.724569	0.027239	2.31459	0.020635	0/+
GUCA1B	THAP9-AS1	0.14076	0.412877	0.833333	0.005266	2.31379	0.020679	0/+
PHIP	THAP9-AS1	-0.00283	0.986924	0.783333	0.01252	2.31275	0.020737	0/+
LOC730101	THAP9-AS1	0.089833	0.602346	0.816667	0.007225	2.31249	0.020751	0/+
FCSK	THAP9-AS1	0.09009	0.601302	0.816667	0.007225	2.31192	0.020782	0/+
CKMT2-AS1	THAP9-AS1	-0.00103	0.995245	0.783333	0.01252	2.3088	0.020954	0/+
CUL9	THAP9-AS1	0.258687	0.127656	0.866667	0.002495	2.3085	0.020972	0/+
LPAR4	THAP9-AS1	0.297922	0.077603	-0.63355	0.066962	-2.30792	0.021003	0/0
DUXAP10	THAP9-AS1	0.083799	0.627034	-0.74855	0.020317	-2.30593	0.021115	0/-
PPP1R3C	THAP9-AS1	-0.11597	0.500617	0.733333	0.024554	2.30316	0.02127	0/+
CCDC66	THAP9-AS1	0.474131	0.003486	0.916667	0.000507	2.3031	0.021273	#ERROR!
PPP1R37	THAP9-AS1	-0.11506	0.504001	0.733333	0.024554	2.30115	0.021383	0/+
CCL15	THAP9-AS1	-0.54251	0.00063	0.416667	0.264586	2.30089	0.021398	-/0
MYOSLID	THAP9-AS1	0.157749	0.358169	0.83666	0.004924	2.29981	0.021459	0/+
MCM9	THAP9-AS1	-0.07002	0.684907	0.753145	0.019142	2.29862	0.021527	0/+
GUSBP2	THAP9-AS1	0.043803	0.799754	0.798348	0.009892	2.29838	0.02154	0/+
LOC101927560	THAP9-AS1	0.003995	0.981551	0.783333	0.01252	2.29781	0.021573	0/+
EBLN2	THAP9-AS1	0.132733	0.440284	0.828459	0.005795	2.29724	0.021605	0/+
PCNX4	THAP9-AS1	0.14852	0.387325	0.833333	0.005266	2.29644	0.021651	0/+
DMAC2L	THAP9-AS1	0.264093	0.11961	0.866667	0.002495	2.2958	0.021687	0/+
EBNA1BP2	THAP9-AS1	-0.03681	0.831228	0.766667	0.015944	2.29577	0.021689	0/+
PDCD11	THAP9-AS1	0.330245	0.049169	0.883333	0.001591	2.29276	0.021862	#ERROR!
LSM7	THAP9-AS1	0.41184	0.012571	-0.54394	0.130055	-2.29258	0.021872	#ERROR!
RBP5	THAP9-AS1	-0.14569	0.396539	0.716667	0.029818	2.29244	0.02188	0/+
ACNATP	THAP9-AS1	-0.34004	0.042442	0.6	0.087623	2.29199	0.021906	-/0
RGS19	THAP9-AS1	0.237323	0.163412	-0.66667	0.049867	-2.29061	0.021986	0/-
NVL	THAP9-AS1	0.331295	0.048409	0.883333	0.001591	2.29017	0.022011	#ERROR!
MAP4K3	THAP9-AS1	-0.07336	0.670695	0.75	0.019942	2.29015	0.022013	0/+
RFWD3	THAP9-AS1	0.206692	0.226471	0.85	0.003705	2.29014	0.022013	0/+
LOC100506100	THAP9-AS1	-0.03864	0.822959	0.764733	0.016378	2.28956	0.022047	0/+
PROC	THAP9-AS1	-0.4417	0.006998	0.516667	0.15439	2.28944	0.022054	-/0
CAPN2	THAP9-AS1	-0.14414	0.401618	0.716667	0.029818	2.28898	0.02208	0/+
RHOT1	THAP9-AS1	0.267842	0.114256	0.866667	0.002495	2.28697	0.022198	0/+
APOC2	THAP9-AS1	-0.31433	0.061892	0.616667	0.076929	2.28688	0.022203	0/0
FKBP1C	THAP9-AS1	0.249614	0.142055	-0.65828	0.053897	-2.28649	0.022225	0/0
BLZF1	THAP9-AS1	0.053797	0.755334	0.8	0.009628	2.28647	0.022227	0/+
DENND2D	THAP9-AS1	-0.10837	0.529281	0.733333	0.024554	2.28632	0.022236	0/+
MIR5685	THAP9-AS1	-0.19061	0.265473	0.691594	0.039043	2.28474	0.022328	0/+
LINC02709	THAP9-AS1	-0.15681	0.361081	0.708918	0.032498	2.28286	0.022438	0/+
RANGRF	THAP9-AS1	0.379304	0.022518	-0.56667	0.111633	-2.28008	0.022603	#ERROR!
MMS19	THAP9-AS1	0.461004	0.004659	0.912142	0.000607	2.27942	0.022642	#ERROR!
NEURL4	THAP9-AS1	0.406692	0.013837	0.9	0.000943	2.27731	0.022768	#ERROR!
PIGF	THAP9-AS1	-0.0278	0.872133	0.766667	0.015944	2.27604	0.022843	0/+
RNU1-70P	THAP9-AS1	-0.28485	0.092208	0.633333	0.067086	2.27586	0.022855	0/0
RFX3-AS1	THAP9-AS1	0.207252	0.225188	0.848141	0.003861	2.27428	0.022949	0/+
ABCC6P2	THAP9-AS1	-0.30874	0.066933	0.616667	0.076929	2.27334	0.023006	0/0
GCNT2P1	THAP9-AS1	-0.16369	0.340112	0.702728	0.034747	2.27134	0.023127	0/+
PPP1R3B	THAP9-AS1	-0.22897	0.179183	0.666667	0.049867	2.27128	0.02313	0/+
GDA	THAP9-AS1	-0.19861	0.245554	0.683333	0.042442	2.26866	0.023289	0/+
CNOT4	THAP9-AS1	0.061909	0.719829	0.8	0.009628	2.26866	0.023289	0/+
NHLRC2	THAP9-AS1	0.162173	0.344674	0.833333	0.005266	2.26582	0.023462	0/+
MIR30C2	THAP9-AS1	-0.17783	0.299433	0.693782	0.038173	2.26501	0.023512	0/+
NETO1	THAP9-AS1	0.257487	0.129496	-0.64742	0.059417	-2.26346	0.023607	0/0
NFE2L2	THAP9-AS1	0.01982	0.908657	0.783333	0.01252	2.26317	0.023625	0/+
CAPZA3	THAP9-AS1	-0.16988	0.321918	0.697504	0.036722	2.26283	0.023646	0/+
DLGAP3	THAP9-AS1	0.034136	0.843321	-0.76151	0.017117	-2.26282	0.023647	0/-
RBM27	THAP9-AS1	0.21879	0.199839	0.85	0.003705	2.26241	0.023672	0/+
CCDC43	THAP9-AS1	0.34275	0.040719	0.883333	0.001591	2.26189	0.023704	#ERROR!
CXCR5	THAP9-AS1	-0.08405	0.626002	-0.80678	0.008594	-2.26179	0.02371	0/-
LRATD1	THAP9-AS1	-0.09048	0.599715	0.736408	0.023655	2.26142	0.023733	0/+
RAB33B	THAP9-AS1	0.112999	0.511714	0.816667	0.007225	2.26126	0.023743	0/+
RN7SL239P	THAP9-AS1	-0.29721	0.078353	0.621059	0.074253	2.26112	0.023752	0/0
GPR88	THAP9-AS1	-0.22429	0.188489	0.666667	0.049867	2.26047	0.023792	0/+
EFCAB7	THAP9-AS1	0.022009	0.898616	0.783333	0.01252	2.25838	0.023922	0/+
AMPD2	THAP9-AS1	-0.19408	0.256707	0.683333	0.042442	2.25835	0.023924	0/+
GLYAT	THAP9-AS1	-0.37071	0.026031	0.566667	0.111633	2.2582	0.023933	-/0
DLX1	THAP9-AS1	0.148177	0.388433	-0.70718	0.03312	-2.25589	0.024078	0/-
PPP1R1B	THAP9-AS1	0.165378	0.335092	-0.69803	0.03652	-2.25495	0.024137	0/-
HMGXB4	THAP9-AS1	0.167053	0.330152	0.833333	0.005266	2.25485	0.024143	0/+
LOC107985075	THAP9-AS1	0.249791	0.141763	-0.64979	0.058183	-2.25442	0.02417	0/0
PWWP3B	THAP9-AS1	-0.01738	0.919877	0.766667	0.015944	2.25322	0.024245	0/+
RN7SL381P	THAP9-AS1	0.069872	0.685525	0.800181	0.009599	2.25225	0.024306	0/+
ALDOB	THAP9-AS1	-0.40798	0.01351	0.533333	0.139227	2.24973	0.024466	-/0
HBG2	THAP9-AS1	0.059223	0.731523	0.795678	0.010329	2.24853	0.024542	0/+
NPEPPSP1	THAP9-AS1	-0.01635	0.924587	0.766131	0.016063	2.24813	0.024568	0/+
KRT18P17	THAP9-AS1	0.007112	0.967163	-0.76948	0.015326	-2.24578	0.024718	0/-
PPM1B	THAP9-AS1	-0.2973	0.078257	0.616667	0.076929	2.24576	0.02472	0/0
ANGPTL1	THAP9-AS1	-0.08958	0.603367	0.733333	0.024554	2.2448	0.024781	0/+
HPN-AS1	THAP9-AS1	-0.01352	0.937643	0.766667	0.015944	2.24476	0.024783	0/+
NABP2	THAP9-AS1	-0.12407	0.470928	0.716667	0.029818	2.24426	0.024816	0/+
LOC285638	THAP9-AS1	0.028592	0.868527	0.783333	0.01252	2.24396	0.024835	0/+
RNF39	THAP9-AS1	0.586176	0.000172	-0.33903	0.372112	-2.24282	0.024909	#ERROR!
KLHL20	THAP9-AS1	0.12175	0.479343	0.816667	0.007225	2.24184	0.024972	0/+
CYP4F26P	THAP9-AS1	0.007488	0.965429	0.774643	0.014236	2.24179	0.024975	0/+
PPP3CB-AS1	THAP9-AS1	0.227829	0.181425	0.85	0.003705	2.24159	0.024988	0/+
NT5C3A	THAP9-AS1	-0.05122	0.766708	0.75	0.019942	2.24152	0.024993	0/+
RBM42	THAP9-AS1	0.038353	0.824255	0.786618	0.011909	2.2413	0.025006	0/+
GBP1P1	THAP9-AS1	-0.13266	0.440524	0.711303	0.031657	2.23942	0.025128	0/+
HMGCS2	THAP9-AS1	-0.36285	0.029629	0.566667	0.111633	2.23833	0.0252	-/0
PAK4	THAP9-AS1	0.123552	0.472814	0.816667	0.007225	2.23783	0.025232	0/+
NDST1-AS1	THAP9-AS1	-0.05889	0.732982	0.74587	0.021026	2.23783	0.025232	0/+
RN7SL208P	THAP9-AS1	0.195839	0.252336	-0.6773	0.045043	-2.23775	0.025237	0/-
C9orf50	THAP9-AS1	0.546647	0.000562	-0.38644	0.304256	-2.23489	0.025424	#ERROR!
ALDH3B2	THAP9-AS1	0.370266	0.026225	-0.55966	0.117136	-2.2346	0.025443	#ERROR!
OR5AK2	THAP9-AS1	-0.14008	0.415153	-0.82158	0.006603	-2.23372	0.025501	0/-
CXorf56	THAP9-AS1	0.176577	0.30292	0.833333	0.005266	2.23337	0.025525	0/+
CCDC30	THAP9-AS1	0.073493	0.67013	0.798348	0.009892	2.23318	0.025537	0/+
CDIN1	THAP9-AS1	-0.15187	0.376597	0.7	0.03577	2.23304	0.025546	0/+
KLKB1	THAP9-AS1	-0.40154	0.015208	0.533333	0.139227	2.23289	0.025556	-/0
ACSF3	THAP9-AS1	0.355235	0.033496	0.883333	0.001591	2.23078	0.025696	#ERROR!
CAMP	THAP9-AS1	-0.14723	0.391496	0.701832	0.035081	2.23055	0.025711	0/+
HOGA1	THAP9-AS1	-0.11777	0.493938	0.716667	0.029818	2.23025	0.025731	0/+
RN7SL25P	THAP9-AS1	-0.14477	0.399553	0.703005	0.034644	2.23011	0.02574	0/+
CDCA7L	THAP9-AS1	0.127156	0.459897	0.816667	0.007225	2.22982	0.025759	0/+
LOC101929099	THAP9-AS1	-0.11446	0.506224	0.718185	0.029311	2.22976	0.025763	0/+
ANKRD13D	THAP9-AS1	0.547233	0.000553	-0.38333	0.308495	-2.22874	0.025831	#ERROR!
DDTL	THAP9-AS1	-0.04506	0.794132	0.75	0.019942	2.228	0.025881	0/+
LOC100422317	THAP9-AS1	0.283268	0.094108	-0.62106	0.074253	-2.22781	0.025893	0/0
MIA2	THAP9-AS1	-0.00515	0.976228	0.766667	0.015944	2.22645	0.025984	0/+
PAX8-AS1	THAP9-AS1	-0.28921	0.087121	0.616667	0.076929	2.22639	0.025988	0/0
INTS2	THAP9-AS1	-0.04428	0.797613	0.75	0.019942	2.22629	0.025995	0/+
C3orf33	THAP9-AS1	0.081483	0.63662	0.8	0.009628	2.2256	0.026041	0/+
CNNM3	THAP9-AS1	-0.14852	0.387325	0.7	0.03577	2.22555	0.026044	0/+
LINC00536	THAP9-AS1	0.381294	0.021763	-0.54772	0.12687	-2.22504	0.026078	#ERROR!
LOC643709	THAP9-AS1	-0.00419	0.980668	-0.76988	0.01524	-2.22319	0.026203	0/-
CDKL4	THAP9-AS1	-0.1455	0.397151	-0.82158	0.006603	-2.22162	0.026309	0/-
H4C2	THAP9-AS1	0.029055	0.866414	0.779423	0.013274	2.22097	0.026353	0/+
LINC02325	THAP9-AS1	-0.06465	0.707954	-0.79288	0.010802	-2.21999	0.02642	0/-
NAPEPLD	THAP9-AS1	-0.04132	0.810915	0.75	0.019942	2.21979	0.026433	0/+
LOC100419073	THAP9-AS1	0.09665	0.57497	-0.72457	0.027239	-2.21947	0.026455	0/-
MITF	THAP9-AS1	-0.37606	0.023794	0.55	0.124977	2.21881	0.0265	-/0
LOC642474	THAP9-AS1	-0.27451	0.105189	0.624137	0.072413	2.21801	0.026554	0/0
BEX5	THAP9-AS1	-0.05214	0.762662	0.744776	0.02132	2.21762	0.026581	0/+
LOC101929524	THAP9-AS1	-0.22271	0.191702	0.656127	0.054964	2.21583	0.026703	0/0
PLCL2	THAP9-AS1	-0.039	0.821342	0.75	0.019942	2.21471	0.02678	0/+
IDH1	THAP9-AS1	-0.17375	0.310862	0.683333	0.042442	2.21229	0.026947	0/+
PALMD	THAP9-AS1	-0.17272	0.313783	0.683333	0.042442	2.20996	0.027108	0/+
EME2	THAP9-AS1	0.044533	0.796487	0.783333	0.01252	2.20903	0.027173	0/+
PDLIM1P4	THAP9-AS1	-0.31044	0.065365	0.59666	0.08987	2.20816	0.027233	0/0
KIAA0040	THAP9-AS1	0.072587	0.673969	-0.73333	0.024554	-2.20736	0.027289	0/-
ERICH4	THAP9-AS1	0.029785	0.863091	0.776899	0.013776	2.20537	0.027428	0/+
PTGES	THAP9-AS1	0.395392	0.016996	-0.52778	0.144178	-2.19997	0.027809	#ERROR!
PPFIBP2	THAP9-AS1	-0.27799	0.100667	0.616667	0.076929	2.19969	0.027829	0/0
NUMB	THAP9-AS1	-0.06873	0.690428	0.733333	0.024554	2.19887	0.027887	0/+
PIP4K2A	THAP9-AS1	0.167707	0.328234	-0.68333	0.042442	-2.19867	0.027901	0/-
ANKRD26	THAP9-AS1	0.246364	0.147492	0.85	0.003705	2.1986	0.027906	0/+
PGRMC1	THAP9-AS1	-0.22523	0.1866	0.65	0.058073	2.19825	0.027931	0/0
CACNA1F	THAP9-AS1	0.118828	0.49003	0.808694	0.008316	2.19693	0.028026	0/+
MIR3202-1	THAP9-AS1	0.369912	0.02638	-0.54772	0.12687	-2.19604	0.028089	#ERROR!
RNF217	THAP9-AS1	0.009784	0.954838	0.766667	0.015944	2.19377	0.028252	0/+
PHGDH	THAP9-AS1	-0.27542	0.10399	0.616667	0.076929	2.19359	0.028265	0/0
FRRS1	THAP9-AS1	-0.24969	0.141922	0.633333	0.067086	2.19299	0.028308	0/0
BPGM	THAP9-AS1	0.096917	0.573906	0.8	0.009628	2.19155	0.028412	0/+
ASIC5	THAP9-AS1	-0.46691	0.004095	0.458171	0.214871	2.19092	0.028458	-/0
PPWD1	THAP9-AS1	0.195379	0.253474	0.833333	0.005266	2.19074	0.02847	0/+
DDC	THAP9-AS1	-0.34363	0.04017	0.566667	0.111633	2.19027	0.028505	-/0
PIM1	THAP9-AS1	0.363707	0.029219	-0.55	0.124977	-2.18748	0.028707	#ERROR!
FAM161A	THAP9-AS1	0.251142	0.139549	0.85	0.003705	2.18746	0.028709	0/+
DHRS3	THAP9-AS1	-0.27198	0.108561	0.616667	0.076929	2.18546	0.028855	0/0
MTHFD2L	THAP9-AS1	0.641184	2.52e-05	-0.23333	0.545699	-2.18389	0.02897	#ERROR!
CCDC148	THAP9-AS1	-0.16077	0.348927	0.683333	0.042442	2.18307	0.029031	0/+
ERRFI1	THAP9-AS1	0.101673	0.555163	0.8	0.009628	2.18103	0.029181	0/+
IGLV3-16	THAP9-AS1	0.148374	0.387796	-0.68952	0.03988	-2.18087	0.029193	0/-
COX10	THAP9-AS1	0.024453	0.887427	0.769881	0.01524	2.17883	0.029345	0/+
PSTK	THAP9-AS1	0.033095	0.848044	0.773137	0.014549	2.1775	0.029443	0/+
OR7E12P	THAP9-AS1	-0.06522	0.705509	0.730297	0.025464	2.17685	0.029492	0/+
C5orf22	THAP9-AS1	-0.15767	0.358418	0.683333	0.042442	2.17611	0.029547	0/+
RGPD3	THAP9-AS1	-0.0515	0.765498	0.736408	0.023655	2.17565	0.029581	0/+
GEN1	THAP9-AS1	-0.12535	0.466332	0.7	0.03577	2.17388	0.029714	0/+
DDT	THAP9-AS1	-0.31454	0.061707	0.583333	0.099186	2.17336	0.029753	0/0
A2M	THAP9-AS1	-0.21416	0.209767	0.65	0.058073	2.1728	0.029796	0/0
OGDHL	THAP9-AS1	-0.09138	0.596095	0.716667	0.029818	2.17185	0.029867	0/+
HECTD3	THAP9-AS1	-0.12381	0.471885	0.7	0.03577	2.17045	0.029973	0/+
RBFOX3	THAP9-AS1	0.20092	0.239993	-0.65727	0.054397	-2.17029	0.029985	0/0
ETFBKMT	THAP9-AS1	0.154074	0.369617	0.816667	0.007225	2.16972	0.030028	0/+
ATP5IF1	THAP9-AS1	-0.0547	0.751349	0.733333	0.024554	2.16806	0.030154	0/+
ADAP2	THAP9-AS1	0.089324	0.604413	-0.71667	0.029818	-2.16732	0.03021	0/-
ENPP7P11	THAP9-AS1	-0.06767	0.694968	0.727097	0.026445	2.1673	0.030212	0/+
RAP2C-AS1	THAP9-AS1	0.064919	0.706794	0.783333	0.01252	2.16427	0.030443	0/+
CST7	THAP9-AS1	0.237096	0.163826	-0.63333	0.067086	-2.16368	0.030489	0/0
FAM178B	THAP9-AS1	0.199877	0.242492	-0.65613	0.054964	-2.16353	0.030501	0/0
ARHGEF38	THAP9-AS1	-0.20541	0.22944	0.652725	0.056677	2.16312	0.030532	0/0
RN7SL180P	THAP9-AS1	0.498839	0.001956	-0.41404	0.26792	-2.16276	0.03056	#ERROR!
LIN7B	THAP9-AS1	0.203399	0.234122	0.831962	0.005411	2.16268	0.030566	0/+
DFFBP1	THAP9-AS1	0.15191	0.376459	-0.6832	0.042498	-2.16265	0.030568	0/-
LOC102031319	THAP9-AS1	-0.25552	0.132549	0.621059	0.074253	2.16233	0.030593	0/0
CEBPA	THAP9-AS1	-0.20927	0.220611	0.65	0.058073	2.16159	0.03065	0/0
PDZD3	THAP9-AS1	-0.24549	0.148983	0.627209	0.070605	2.16094	0.0307	0/0
GPRC5C	THAP9-AS1	-0.20721	0.22529	0.65	0.058073	2.15688	0.031015	0/0
LINC02043	THAP9-AS1	-0.25284	0.136811	0.621059	0.074253	2.15604	0.03108	0/0
LRRC46	THAP9-AS1	0.034882	0.839941	0.769881	0.01524	2.15598	0.031085	0/+
CLINT1	THAP9-AS1	-0.20669	0.226471	0.65	0.058073	2.1557	0.031107	0/0
CDKN2D	THAP9-AS1	0.428084	0.009199	-0.48333	0.18747	-2.1554	0.031131	#ERROR!
B4GALT4	THAP9-AS1	-0.04891	0.776985	0.733333	0.024554	2.15534	0.031135	0/+
NR3C2	THAP9-AS1	0.161272	0.347397	0.816667	0.007225	2.15356	0.031274	0/+
METAP2	THAP9-AS1	0.070013	0.684926	0.783333	0.01252	2.15308	0.031313	0/+
ITGB7	THAP9-AS1	0.147114	0.391885	-0.68333	0.042442	-2.15246	0.031361	0/-
C12orf73	THAP9-AS1	-0.03385	0.844618	0.739522	0.022768	2.15193	0.031403	0/+
CYP4F2	THAP9-AS1	-0.54958	0.000517	0.35	0.35582	2.1518	0.031413	-/0
LOC100129917	THAP9-AS1	0.172234	0.315154	0.820091	0.006788	2.15158	0.031431	0/+
C7orf50	THAP9-AS1	0.162162	0.344705	0.816667	0.007225	2.15156	0.031432	0/+
MORC2	THAP9-AS1	0.16243	0.343898	0.816667	0.007225	2.15096	0.031479	0/+
EBAG9	THAP9-AS1	0.213642	0.210891	0.833333	0.005266	2.14903	0.031632	0/+
CREB3L2	THAP9-AS1	-0.04556	0.791897	0.733333	0.024554	2.148	0.031714	0/+
GAB1	THAP9-AS1	0.031403	0.85573	0.766667	0.015944	2.14644	0.031838	0/+
LCP1	THAP9-AS1	0.144402	0.400769	-0.68333	0.042442	-2.14639	0.031842	0/-
ASH1L-AS1	THAP9-AS1	0.388467	0.019215	0.883333	0.001591	2.14637	0.031844	#ERROR!
MMP12	THAP9-AS1	0.32631	0.052101	-0.56598	0.112165	-2.14535	0.031925	0/0
PPIEL	THAP9-AS1	-0.50506	0.00168	0.400091	0.285986	2.14436	0.032004	-/0
LRRC47	THAP9-AS1	0.269902	0.111393	0.85	0.003705	2.14341	0.03208	0/+
MANEA-DT	THAP9-AS1	-0.02719	0.874925	0.740593	0.022467	2.14252	0.032152	0/+
AURKBP1	THAP9-AS1	0.433907	0.008194	0.894427	0.001134	2.14241	0.032161	#ERROR!
BUD13	THAP9-AS1	0.390115	0.018666	0.883333	0.001591	2.14211	0.032184	#ERROR!
MED13	THAP9-AS1	0.033977	0.844044	0.766667	0.015944	2.1408	0.03229	0/+
ALDH8A1	THAP9-AS1	-0.30105	0.074392	0.583333	0.099186	2.14074	0.032295	0/0
CSP2	THAP9-AS1	0.400935	0.015378	-0.50255	0.167955	-2.1392	0.03242	#ERROR!
CT75	THAP9-AS1	-0.20911	0.220958	0.644068	0.061187	2.13891	0.032443	0/0
DTNB	THAP9-AS1	0.120721	0.483095	0.8	0.009628	2.13883	0.03245	0/+
LOC541473	THAP9-AS1	0.035577	0.836795	0.766938	0.015884	2.13873	0.032457	0/+
HCCAT5	THAP9-AS1	-0.09285	0.59016	0.708088	0.032793	2.13698	0.0326	0/+
PRRX2	THAP9-AS1	0.253572	0.135634	-0.61519	0.077844	-2.13696	0.032601	0/0
PRAP1	THAP9-AS1	-0.50251	0.001789	0.4	0.286105	2.13665	0.032626	-/0
CPNE8	THAP9-AS1	-0.22523	0.1866	0.633333	0.067086	2.13624	0.03266	0/0
ACTG1P23	THAP9-AS1	0.300528	0.07492	-0.58233	0.099914	-2.13614	0.032668	0/0
PKD1P3	THAP9-AS1	0.073369	0.670655	0.78154	0.012862	2.13557	0.032714	0/+
CES2	THAP9-AS1	-0.22471	0.187636	0.633333	0.067086	2.13505	0.032757	0/0
POLR1D	THAP9-AS1	0.273616	0.106366	0.85	0.003705	2.13463	0.032791	0/+
LUC7L2	THAP9-AS1	0.331532	0.04824	0.866667	0.002495	2.13375	0.032863	#ERROR!
LINC00618	THAP9-AS1	0.34398	0.039956	-0.54772	0.12687	-2.13099	0.03309	#ERROR!
PCTP	THAP9-AS1	-0.31933	0.057647	0.566667	0.111633	2.1305	0.033131	0/0
KRTAP5-AS1	THAP9-AS1	-0.14688	0.392631	0.67783	0.044809	2.12951	0.033212	0/+
GSTA1	THAP9-AS1	-0.43573	0.0079	0.466667	0.205386	2.12886	0.033266	-/0
CRYZ	THAP9-AS1	-0.34003	0.042452	0.55	0.124977	2.12833	0.03331	-/0
CD163	THAP9-AS1	-0.000515	0.997622	-0.75	0.019942	-2.12819	0.033321	0/-
PHYH	THAP9-AS1	-0.13616	0.428446	0.683333	0.042442	2.12801	0.033337	0/+
PLD1	THAP9-AS1	-0.23063	0.175968	0.627621	0.070365	2.12796	0.03334	0/0
LOC105376805	THAP9-AS1	0.145707	0.396478	-0.67783	0.044809	-2.12688	0.03343	0/-
DSC1	THAP9-AS1	0.018838	0.913163	0.757618	0.018041	2.1267	0.033445	0/+
ADH4	THAP9-AS1	-0.24494	0.149916	0.616667	0.076929	2.12205	0.033834	0/0
NFIA	THAP9-AS1	0.003604	0.983358	0.75	0.019942	2.12143	0.033886	0/+
MTSS1	THAP9-AS1	0.004118	0.980981	0.75	0.019942	2.1203	0.033981	0/+
FBXL19-AS1	THAP9-AS1	0.080314	0.64148	0.78154	0.012862	2.12028	0.033982	0/+
DCAF4L1	THAP9-AS1	0.207163	0.225391	0.82707	0.005953	2.11976	0.034027	0/+
PCBP1-AS1	THAP9-AS1	0.129481	0.451664	0.8	0.009628	2.11935	0.034061	0/+
CAP2	THAP9-AS1	-0.06718	0.697052	0.716667	0.029818	2.11856	0.034128	0/+
RERE	THAP9-AS1	0.085714	0.619152	0.783333	0.01252	2.1185	0.034132	0/+
LRRC58	THAP9-AS1	0.085972	0.618096	0.783333	0.01252	2.11794	0.03418	0/+
MTMR4	THAP9-AS1	0.044788	0.795348	0.766667	0.015944	2.1171	0.034251	0/+
MIR205HG	THAP9-AS1	-0.07006	0.684733	-0.7769	0.013776	-2.117	0.03426	0/-
ACE2	THAP9-AS1	-0.37555	0.024002	0.516667	0.15439	2.11551	0.034386	-/0
FLJ20712	THAP9-AS1	0.318898	0.058001	-0.56218	0.115134	-2.11506	0.034425	0/0
PCDHA10	THAP9-AS1	0.083054	0.630109	0.78154	0.012862	2.11425	0.034494	0/+
CDK8	THAP9-AS1	0.164736	0.336997	0.811723	0.007889	2.11367	0.034543	0/+
FOXN4	THAP9-AS1	-0.23651	0.164909	0.619252	0.075347	2.1116	0.034721	0/0
RN7SL184P	THAP9-AS1	-0.08254	0.632232	0.707475	0.033013	2.11156	0.034725	0/+
MTR	THAP9-AS1	0.23166	0.173993	0.833333	0.005266	2.10754	0.035071	0/+
GUCY1B2	THAP9-AS1	0.069059	0.689001	0.774643	0.014236	2.1068	0.035135	0/+
PAGE4	THAP9-AS1	-0.08005	0.642562	0.707475	0.033013	2.10608	0.035198	0/+
MTND2P32	THAP9-AS1	-0.33378	0.046651	0.547723	0.12687	2.10577	0.035224	-/0
LRRCC1	THAP9-AS1	0.135787	0.429739	0.8	0.009628	2.1053	0.035265	0/+
IFIT1	THAP9-AS1	-0.09395	0.58574	0.7	0.03577	2.10431	0.035351	0/+
ALDH1A1	THAP9-AS1	-0.26203	0.122629	0.6	0.087623	2.10411	0.035369	0/0
LLGL2	THAP9-AS1	0.092407	0.591943	0.783333	0.01252	2.10374	0.035401	0/+
NPAT	THAP9-AS1	0.286652	0.090077	0.85	0.003705	2.10367	0.035407	0/+
HILPDA	THAP9-AS1	0.408392	0.013407	-0.48333	0.18747	-2.10316	0.035452	#ERROR!
CDC42EP3	THAP9-AS1	0.285199	0.091791	-0.58333	0.099186	-2.10279	0.035484	0/0
PPM1F	THAP9-AS1	0.284206	0.092977	-0.58333	0.099186	-2.10042	0.035692	0/0
KIAA0753	THAP9-AS1	0.288031	0.088473	0.85	0.003705	2.10038	0.035695	0/+
ACSM2A	THAP9-AS1	-0.26006	0.125579	0.6	0.087623	2.09947	0.035775	0/0
PSMA1	THAP9-AS1	0.138481	0.420556	0.8	0.009628	2.09929	0.035791	0/+
GTF3C3	THAP9-AS1	0.139391	0.41748	0.8	0.009628	2.09726	0.035971	0/+
MZT1	THAP9-AS1	0.186615	0.275808	0.816667	0.007225	2.09637	0.03605	0/+
NUP37	THAP9-AS1	-0.02162	0.900392	0.733333	0.024554	2.09555	0.036122	0/+
MIR4783	THAP9-AS1	-0.37394	0.024662	0.511208	0.159556	2.09518	0.036155	-/0
B4GAT1	THAP9-AS1	-0.12124	0.481217	0.683333	0.042442	2.09478	0.03619	0/+
HBB	THAP9-AS1	-0.17981	0.294021	0.65	0.058073	2.09457	0.036209	0/0
RNA5SP46	THAP9-AS1	-0.17044	0.320291	0.655485	0.055284	2.09435	0.036229	0/0
LOC101928222	THAP9-AS1	0.297239	0.078318	-0.57186	0.107657	-2.09391	0.036268	0/0
NELL2	THAP9-AS1	0.2813	0.096515	-0.58333	0.099186	-2.09351	0.036304	0/0
LRRC23	THAP9-AS1	0.331553	0.048224	0.861932	0.002806	2.09274	0.036373	#ERROR!
FAM110D	THAP9-AS1	0.055359	0.748455	-0.71667	0.029818	-2.09259	0.036386	0/-
PPP1CB	THAP9-AS1	0.14157	0.410165	0.8	0.009628	2.0924	0.036403	0/+
CLIC2	THAP9-AS1	0.088546	0.607577	-0.7	0.03577	-2.09238	0.036404	0/-
GTF2H2C	THAP9-AS1	-0.01339	0.938231	0.736408	0.023655	2.09215	0.036425	0/+
MIR6730	THAP9-AS1	0.162968	0.34228	-0.65924	0.053424	-2.09201	0.036437	0/0
AKAP8	THAP9-AS1	0.409524	0.013128	0.883333	0.001591	2.09155	0.036479	#ERROR!
PPARA	THAP9-AS1	-0.25611	0.131626	0.6	0.087623	2.09022	0.036598	0/0
MYH7B	THAP9-AS1	0.190458	0.265863	0.816667	0.007225	2.08765	0.03683	0/+
LOC101928847	THAP9-AS1	0.100023	0.561632	-0.69282	0.038554	-2.08722	0.036869	0/-
EXD2	THAP9-AS1	-0.01776	0.918113	0.733333	0.024554	2.0871	0.036879	0/+
RBM12B	THAP9-AS1	0.100129	0.561218	0.783333	0.01252	2.08668	0.036917	0/+
MYG1	THAP9-AS1	0.019562	0.909838	0.75	0.019942	2.0865	0.036934	0/+
COA6	THAP9-AS1	0.059459	0.730492	0.766667	0.015944	2.0849	0.037078	0/+
DIS3L2	THAP9-AS1	0.306583	0.068964	0.853564	0.003418	2.08426	0.037136	0/+
CNMD	THAP9-AS1	0.520479	0.001137	-0.35857	0.343337	-2.08398	0.037162	#ERROR!
IGFBP1	THAP9-AS1	-0.0157	0.927581	0.733333	0.024554	2.08259	0.037289	0/+
CYB5RL	THAP9-AS1	0.029086	0.866273	0.753145	0.019142	2.08146	0.037392	0/+
LOC440300	THAP9-AS1	0.468263	0.003974	-0.4159	0.265556	-2.08032	0.037496	#ERROR!
RN7SL23P	THAP9-AS1	0.305666	0.069841	-0.56125	0.115872	-2.07998	0.037527	0/0
AGFG2	THAP9-AS1	-0.01441	0.933503	0.733333	0.024554	2.07977	0.037546	0/+
PHF21B	THAP9-AS1	0.01991	0.908242	-0.7303	0.025464	-2.07749	0.037756	0/-
MIR4285	THAP9-AS1	0.322168	0.055336	-0.54772	0.12687	-2.0773	0.037774	0/0
MOCS1	THAP9-AS1	0.031145	0.8569	0.753145	0.019142	2.07695	0.037806	0/+
AZGP1P2	THAP9-AS1	-0.29716	0.078397	0.566667	0.111633	2.0769	0.037811	0/0
OSGEPL1	THAP9-AS1	0.14852	0.387325	0.8	0.009628	2.07686	0.037815	0/+
COMMD10	THAP9-AS1	-0.12305	0.474617	0.67783	0.044809	2.07639	0.037858	0/+
CPS1-IT1	THAP9-AS1	-0.04777	0.782053	0.716667	0.029818	2.07593	0.0379	0/+
CAMK2N2	THAP9-AS1	-0.02446	0.887405	-0.75	0.019942	-2.07578	0.037914	0/-
LINC01671	THAP9-AS1	-0.08083	0.639337	0.7	0.03577	2.07537	0.037952	0/+
MTATP6P26	THAP9-AS1	0.210614	0.217586	0.821584	0.006603	2.07439	0.038043	0/+
F13B	THAP9-AS1	-0.48091	0.002988	0.4	0.286105	2.0743	0.038052	-/0
KCNV2	THAP9-AS1	0.041615	0.809568	0.756978	0.018196	2.07352	0.038124	0/+
CATSPERE	THAP9-AS1	0.20667	0.226522	0.820091	0.006788	2.0734	0.038135	0/+
GTF2H3	THAP9-AS1	-0.22384	0.1894	0.616667	0.076929	2.07317	0.038156	0/0
ANKRD24	THAP9-AS1	-0.01004	0.953657	0.733333	0.024554	2.0702	0.038434	0/+
PHF12	THAP9-AS1	0.300644	0.074802	0.85	0.003705	2.07016	0.038437	0/+
MARVELD3	THAP9-AS1	-0.16848	0.325979	0.65	0.058073	2.06901	0.038545	0/0
GPR17	THAP9-AS1	0.027552	0.873267	0.75	0.019942	2.069	0.038546	0/+
PTENP1-AS	THAP9-AS1	0.318555	0.058287	-0.54772	0.12687	-2.06849	0.038594	0/0
GAPDHP62	THAP9-AS1	0.087896	0.610225	0.775058	0.014151	2.06759	0.038679	0/+
RNA5SP219	THAP9-AS1	0.105553	0.540085	-0.68516	0.041675	-2.06753	0.038684	0/-
NPEPPS	THAP9-AS1	0.199485	0.243437	0.816667	0.007225	2.06711	0.038724	0/+
NR1D1	THAP9-AS1	0.29294	0.08294	-0.56667	0.111633	-2.06678	0.038755	0/0
DLGAP5	THAP9-AS1	0.11854	0.49109	-0.67783	0.044809	-2.06636	0.038794	0/-
LGALS4	THAP9-AS1	-0.10811	0.530266	0.683333	0.042442	2.06567	0.03886	0/+
CRYZL1	THAP9-AS1	0.056128	0.745077	0.761513	0.017117	2.06512	0.038912	0/+
LOC105374114	THAP9-AS1	0.31617	0.060301	-0.54772	0.12687	-2.06268	0.039143	0/0
CAPN6	THAP9-AS1	0.030888	0.858071	0.75	0.019942	2.0617	0.039237	0/+
CYSLTR2	THAP9-AS1	0.099891	0.562154	-0.6862	0.041242	-2.0593	0.039466	0/-
ANKRA2	THAP9-AS1	0.11262	0.513139	0.783333	0.01252	2.05903	0.039491	0/+
FAM161B	THAP9-AS1	-0.13462	0.433751	0.666667	0.049867	2.05755	0.039634	0/+
PALM	THAP9-AS1	0.307999	0.067626	-0.55231	0.123077	-2.05725	0.039662	0/0
AUTS2	THAP9-AS1	-0.03912	0.820773	0.716667	0.029818	2.05698	0.039688	0/+
CMTM8	THAP9-AS1	-0.13411	0.435527	0.666667	0.049867	2.0564	0.039744	0/+
GOPC	THAP9-AS1	0.253797	0.135276	0.833333	0.005266	2.05606	0.039777	0/+
ABCG8	THAP9-AS1	-0.44253	0.006881	0.433333	0.243952	2.05579	0.039802	-/0
FUT11	THAP9-AS1	0.310079	0.065699	-0.55	0.124977	-2.05504	0.039876	0/0
MIRLET7BHG	THAP9-AS1	0.371009	0.025902	-0.5	0.170471	-2.05478	0.0399	#ERROR!
ALDH1L1-AS1	THAP9-AS1	0.101709	0.555021	0.778249	0.013506	2.05469	0.039909	0/+
C1orf167	THAP9-AS1	0.203977	0.232767	-0.62414	0.072413	-2.0542	0.039956	0/0
PSD	THAP9-AS1	0.115466	0.502478	0.783333	0.01252	2.05272	0.0401	0/+
C9orf24	THAP9-AS1	0.165432	0.334932	-0.64708	0.059592	-2.05113	0.040254	0/0
C6orf223	THAP9-AS1	-0.13644	0.427505	0.663889	0.05118	2.0507	0.040296	0/0
NUP210	THAP9-AS1	-0.06924	0.688225	0.7	0.03577	2.04987	0.040377	0/+
CSTF2	THAP9-AS1	0.063578	0.712592	0.761513	0.017117	2.04875	0.040486	0/+
RFT1	THAP9-AS1	0.310445	0.065364	0.85	0.003705	2.0465	0.040707	0/+
ACOX2	THAP9-AS1	-0.30635	0.06919	0.55	0.124977	2.04601	0.040756	0/0
IL22RA1	THAP9-AS1	-0.36733	0.027531	0.5	0.170471	2.04547	0.040808	-/0
RN7SL48P	THAP9-AS1	-0.01731	0.920173	0.724569	0.027239	2.04518	0.040837	0/+
CTAGE9	THAP9-AS1	-0.20468	0.231115	0.621059	0.074253	2.04481	0.040873	0/0
FBXO38	THAP9-AS1	0.119184	0.488723	0.783333	0.01252	2.04447	0.040907	0/+
RBMX2	THAP9-AS1	0.163192	0.341609	0.8	0.009628	2.04395	0.040959	0/+
GSTO2	THAP9-AS1	0.002832	0.986923	0.733333	0.024554	2.04203	0.041149	0/+
C11orf54	THAP9-AS1	-0.28211	0.095518	0.566667	0.111633	2.04094	0.041257	0/0
NAT1	THAP9-AS1	0.010171	0.953055	0.736408	0.023655	2.04059	0.041291	0/+
ARHGAP20	THAP9-AS1	0.080247	0.641757	0.766667	0.015944	2.03918	0.041432	0/+
PRSS21	THAP9-AS1	0.069161	0.688566	-0.6975	0.036722	-2.03902	0.041448	0/-
EEF1A1P25	THAP9-AS1	0.250714	0.140248	-0.58854	0.095483	-2.0388	0.04147	0/0
GALM	THAP9-AS1	-0.12562	0.46538	0.666667	0.049867	2.03751	0.041599	0/+
HFE	THAP9-AS1	-0.12561	0.465409	0.666667	0.049867	2.03749	0.041601	0/+
ADRA1D	THAP9-AS1	0.445063	0.00653	-0.42379	0.255659	-2.03712	0.041638	#ERROR!
IGFL2	THAP9-AS1	0.377564	0.023196	-0.48805	0.182564	-2.03687	0.041663	#ERROR!
HMGN2	THAP9-AS1	0.122659	0.476044	0.783333	0.01252	2.03675	0.041675	0/+
ING3	THAP9-AS1	0.339275	0.04294	0.857173	0.003144	2.03381	0.041971	#ERROR!
EDRF1	THAP9-AS1	0.167964	0.327481	0.8	0.009628	2.03321	0.042031	0/+
LINC01933	THAP9-AS1	0.170733	0.319455	-0.63901	0.063924	-2.03294	0.042058	0/0
PACRG-AS3	THAP9-AS1	0.186864	0.275158	0.806859	0.008582	2.03285	0.042067	0/+
DDO	THAP9-AS1	-0.27867	0.099803	0.566667	0.111633	2.03277	0.042076	0/0
DPF3	THAP9-AS1	-0.12349	0.473049	0.666667	0.049867	2.03277	0.042076	0/+
PRDX1	THAP9-AS1	-0.02806	0.870967	0.716667	0.029818	2.03273	0.04208	0/+
RN7SL650P	THAP9-AS1	0.000676	0.996877	0.730297	0.025464	2.03243	0.04211	0/+
IRF2BP2	THAP9-AS1	0.125354	0.466332	0.783333	0.01252	2.03076	0.042279	0/+
ODF2	THAP9-AS1	0.449578	0.005944	-0.41667	0.264586	-2.03055	0.042301	#ERROR!
LENG9	THAP9-AS1	-0.04377	0.799918	-0.74911	0.020174	-2.02901	0.042458	0/-
CDC5L	THAP9-AS1	0.265397	0.117727	0.833333	0.005266	2.02884	0.042475	0/+
CD164L2	THAP9-AS1	0.168757	0.325171	-0.63901	0.063924	-2.02849	0.04251	0/0
APBA2	THAP9-AS1	0.204118	0.232435	-0.61667	0.076929	-2.02794	0.042566	0/0
LBX2-AS1	THAP9-AS1	-0.12125	0.48116	0.666667	0.049867	2.0278	0.042581	0/+
LARP4	THAP9-AS1	-0.17761	0.300064	0.633333	0.067086	2.02759	0.042602	0/0
OSBPL6	THAP9-AS1	0.046724	0.7867	0.75	0.019942	2.02699	0.042664	0/+
NACAP5	THAP9-AS1	0.301348	0.07409	-0.54772	0.12687	-2.02683	0.04268	0/0
CEBPE	THAP9-AS1	-0.0159	0.926662	-0.73593	0.023795	-2.02575	0.04279	0/-
RN7SL192P	THAP9-AS1	-0.00839	0.961259	0.724569	0.027239	2.02566	0.0428	0/+
ACTG1P25	THAP9-AS1	-0.05727	0.740074	0.700478	0.035589	2.02561	0.042804	0/+
ASF1A	THAP9-AS1	0.128185	0.456241	0.783333	0.01252	2.02447	0.042922	0/+
ADGRE5	THAP9-AS1	0.275161	0.104327	-0.56667	0.111633	-2.02445	0.042924	0/0
KANK1	THAP9-AS1	-0.08932	0.604436	0.683333	0.042442	2.02414	0.042956	0/+
HEXIM2	THAP9-AS1	-0.08857	0.607461	0.683333	0.042442	2.0225	0.043125	0/+
RNASEK-C17orf49	THAP9-AS1	0.512776	0.001385	-0.3431	0.366029	-2.02237	0.043138	#ERROR!
H2AC13	THAP9-AS1	0.006621	0.969427	-0.72457	0.027239	-2.02178	0.043199	0/-
DPF2	THAP9-AS1	0.376319	0.023691	0.866667	0.002495	2.02166	0.043211	#ERROR!
GPR33	THAP9-AS1	-0.00585	0.972989	0.724569	0.027239	2.02009	0.043374	0/+
IGLON5	THAP9-AS1	-0.01956	0.909832	-0.73641	0.023655	-2.02003	0.04338	0/-
RN7SL258P	THAP9-AS1	-0.00566	0.973861	0.724569	0.027239	2.01968	0.043417	0/+
H2BC9	THAP9-AS1	0.164175	0.338668	-0.63901	0.063924	-2.01818	0.043573	0/0
ARID1A	THAP9-AS1	0.175032	0.307236	0.8	0.009628	2.01727	0.043667	0/+
PAH	THAP9-AS1	-0.29421	0.081555	0.55	0.124977	2.01681	0.043715	0/0
FFAR4	THAP9-AS1	0.086268	0.616882	0.764733	0.016378	2.01569	0.043833	0/+
LINC01278	THAP9-AS1	0.132304	0.441776	0.783333	0.01252	2.0153	0.043874	0/+
ITGA6-AS1	THAP9-AS1	0.432218	0.008476	-0.42844	0.249915	-2.01475	0.04393	#ERROR!
PELI2	THAP9-AS1	0.335028	0.045785	-0.51667	0.15439	-2.014	0.04401	#ERROR!
ARMC4	THAP9-AS1	0.299736	0.075727	-0.5448	0.129322	-2.01384	0.044026	0/0
HNRNPC	THAP9-AS1	0.324345	0.053616	0.85	0.003705	2.01267	0.044149	0/+
HSPBAP1	THAP9-AS1	0.556664	0.000422	-0.28333	0.46003	-2.01187	0.044234	#ERROR!
LRRC3-DT	THAP9-AS1	-0.13358	0.437354	0.655485	0.055284	2.01175	0.044246	0/0
ILDR1	THAP9-AS1	-0.02934	0.865101	0.711303	0.031657	2.0116	0.044262	0/+
CTAGE1	THAP9-AS1	-0.05643	0.743742	0.697277	0.03681	2.01008	0.044422	0/+
LINC02550	THAP9-AS1	0.156944	0.360658	-0.64118	0.062741	-2.00998	0.044433	0/0
NXPE1	THAP9-AS1	0.01142	0.947295	0.730297	0.025464	2.00892	0.044546	0/+
HMGN1P8	THAP9-AS1	-0.10528	0.541143	0.67082	0.047945	2.00884	0.044554	0/+
ENPP7	THAP9-AS1	-0.52974	0.000892	0.316667	0.406397	2.00844	0.044596	-/0
G2E3	THAP9-AS1	0.311346	0.064546	0.845196	0.004117	2.00698	0.044752	0/+
DBET	THAP9-AS1	0.003491	0.983877	-0.72271	0.02783	-2.00641	0.044812	0/-
LOC100422640	THAP9-AS1	0.012641	0.941669	0.730297	0.025464	2.00625	0.04483	0/+
LOC100507334	THAP9-AS1	-0.21616	0.205425	0.602495	0.085967	2.00617	0.044839	0/0
COX5B	THAP9-AS1	-0.04916	0.775841	0.7	0.03577	2.00577	0.044881	0/+
RAB11B	THAP9-AS1	0.275418	0.10399	0.833333	0.005266	2.00517	0.044945	0/+
MBTD1	THAP9-AS1	0.327928	0.050879	0.85	0.003705	2.0039	0.045081	0/+
EIF4A2P4	THAP9-AS1	0.187099	0.274542	0.802261	0.009274	2.00378	0.045093	0/+
HNF1B	THAP9-AS1	0.020592	0.905114	0.733333	0.024554	2.00315	0.045161	0/+
ASXL2	THAP9-AS1	-0.04788	0.781552	0.7	0.03577	2.00296	0.045182	0/+
PPIAP76	THAP9-AS1	0.29134	0.084713	-0.54772	0.12687	-2.00281	0.045197	0/0
ANKRD29	THAP9-AS1	0.181725	0.288812	0.8	0.009628	2.00215	0.045269	0/+
ANKRD1	THAP9-AS1	-0.10953	0.524835	0.666667	0.049867	2.00181	0.045306	0/+
LOC220729	THAP9-AS1	0.384219	0.020692	0.866667	0.002495	2.00145	0.045344	#ERROR!
LYG2	THAP9-AS1	-0.28015	0.097949	0.555738	0.120281	2.00136	0.045354	0/0
CNN2	THAP9-AS1	0.43861	0.007453	-0.41667	0.264586	-2.00064	0.045431	#ERROR!
IMPDH1	THAP9-AS1	0.386615	0.019848	-0.46667	0.205386	-1.99945	0.04556	#ERROR!
PWWP2A	THAP9-AS1	0.183012	0.285353	0.8	0.009628	1.99923	0.045583	0/+
MPP6	THAP9-AS1	-0.07799	0.651176	0.683333	0.042442	1.99918	0.045589	0/+
PPP1CC	THAP9-AS1	-0.10812	0.530239	0.666667	0.049867	1.99867	0.045644	0/+
ANXA13	THAP9-AS1	-0.10811	0.530266	0.666667	0.049867	1.99865	0.045646	0/+
GTF2H1	THAP9-AS1	0.022654	0.895661	0.733333	0.024554	1.99864	0.045648	0/+
PKD1P5	THAP9-AS1	0.159995	0.351278	-0.63599	0.065595	-1.99765	0.045755	0/0
HNRNPH3	THAP9-AS1	0.507593	0.001578	0.9	0.000943	1.99753	0.045768	#ERROR!
LOC100421692	THAP9-AS1	0.338631	0.043362	-0.50797	0.162664	-1.99709	0.045815	#ERROR!
RN7SL382P	THAP9-AS1	0.004673	0.978419	0.724569	0.027239	1.99706	0.045818	0/+
NPM1P50	THAP9-AS1	0.288233	0.08824	-0.54772	0.12687	-1.99539	0.046	0/0
KCTD15	THAP9-AS1	-0.38497	0.020425	0.466667	0.205386	1.99521	0.04602	-/0
HTATIP2	THAP9-AS1	-0.16268	0.343155	0.633333	0.067086	1.99394	0.046158	0/0
IHH	THAP9-AS1	-0.01017	0.953061	0.716667	0.029818	1.99357	0.046199	0/+
CLRN3	THAP9-AS1	-0.59846	0.000116	0.216667	0.575515	1.99349	0.046207	-/0
ARG2	THAP9-AS1	0.134303	0.434844	-0.65	0.058073	-1.99245	0.046321	0/0
BORCS7	THAP9-AS1	-0.0749	0.664164	0.683333	0.042442	1.99238	0.046329	0/+
MGA	THAP9-AS1	0.232432	0.172522	0.816667	0.007225	1.99147	0.04643	0/+
CYTH1	THAP9-AS1	0.186873	0.275135	0.8	0.009628	1.99048	0.046538	0/+
MED29	THAP9-AS1	0.02677	0.87684	0.733333	0.024554	1.98962	0.046632	0/+
POLR3F	THAP9-AS1	0.345307	0.039146	0.853564	0.003418	1.98942	0.046655	#ERROR!
MOB3A	THAP9-AS1	0.344659	0.03954	-0.5	0.170471	-1.98864	0.046741	#ERROR!
LOC100128108	THAP9-AS1	0.011129	0.948639	-0.71506	0.030363	-1.98844	0.046764	0/-
ASNSP3	THAP9-AS1	-0.16116	0.347729	0.632687	0.067452	1.98817	0.046792	0/0
CTSD	THAP9-AS1	-0.1323	0.441776	0.65	0.058073	1.988	0.046812	0/0
LOC101927752	THAP9-AS1	0.345946	0.03876	0.853564	0.003418	1.98783	0.04683	#ERROR!
PRKCQ	THAP9-AS1	0.303385	0.072061	-0.53333	0.139227	-1.98724	0.046896	0/0
DTNA	THAP9-AS1	-0.15933	0.353307	0.633333	0.067086	1.98642	0.046986	0/0
C4orf51	THAP9-AS1	-0.28402	0.093202	0.547723	0.12687	1.98535	0.047106	0/0
APOH	THAP9-AS1	-0.36242	0.029838	0.483333	0.18747	1.98496	0.047149	-/0
OMA1	THAP9-AS1	0.146084	0.395244	0.783333	0.01252	1.98454	0.047195	0/+
EGFLAM	THAP9-AS1	-0.12575	0.46492	0.652725	0.056677	1.98377	0.047282	0/0
ESRRA	THAP9-AS1	-0.00541	0.97504	0.716667	0.029818	1.98314	0.047352	0/+
PRR12	THAP9-AS1	0.029732	0.863334	0.733333	0.024554	1.98314	0.047352	0/+
LOC100288803	THAP9-AS1	0.282999	0.094435	-0.54772	0.12687	-1.98292	0.047377	0/0
ADORA2A-AS1	THAP9-AS1	-0.20961	0.219835	0.6	0.087623	1.98259	0.047413	0/0
AKT1S1	THAP9-AS1	-0.36139	0.030342	0.483333	0.18747	1.98236	0.047438	-/0
RAMAC	THAP9-AS1	-0.12974	0.450758	0.65	0.058073	1.98229	0.047447	0/0
CHPT1	THAP9-AS1	-0.12973	0.450787	0.65	0.058073	1.98227	0.047449	0/0
FCRL1	THAP9-AS1	0.048986	0.776632	-0.69457	0.037864	-1.98224	0.047453	0/-
RBM11	THAP9-AS1	0.393691	0.01752	-0.45314	0.220599	-1.98017	0.047684	#ERROR!
MIR924HG	THAP9-AS1	-0.21829	0.2009	0.593306	0.092162	1.97974	0.047733	0/0
PROZ	THAP9-AS1	-0.20824	0.22293	0.6	0.087623	1.97946	0.047764	0/0
AMY2B	THAP9-AS1	0.192021	0.261887	0.8	0.009628	1.9788	0.047839	0/+
PPP5C	THAP9-AS1	0.107851	0.531251	0.766667	0.015944	1.97823	0.047903	0/+
LINC01251	THAP9-AS1	0.326996	0.051579	-0.51121	0.159556	-1.97802	0.047926	0/0
CYP2B7P	THAP9-AS1	-0.37755	0.023201	0.466667	0.205386	1.97622	0.04813	-/0
DMRT2	THAP9-AS1	-0.0785	0.649069	0.677296	0.045043	1.97569	0.04819	0/+
FOXP2	THAP9-AS1	0.109016	0.526797	0.766667	0.015944	1.97565	0.048194	0/+
PARP11-AS1	THAP9-AS1	-0.0154	0.928985	0.710047	0.032098	1.97551	0.04821	0/+
GOLGA8B	THAP9-AS1	0.225483	0.186084	0.811723	0.007889	1.97542	0.048221	0/+
PROX1-AS1	THAP9-AS1	0.193706	0.257642	0.8	0.009628	1.97497	0.048272	0/+
ACBD5	THAP9-AS1	0.070528	0.682729	0.75	0.019942	1.97471	0.048301	0/+
ACVR2B	THAP9-AS1	0.411507	0.01265	-0.43333	0.243952	-1.97276	0.048523	#ERROR!
LINC00567	THAP9-AS1	0.143578	0.403488	-0.63901	0.063924	-1.97201	0.048609	0/0
CFL1P1	THAP9-AS1	-0.02203	0.898525	0.705907	0.033579	1.97187	0.048625	0/+
ATP1B1	THAP9-AS1	0.152124	0.375779	0.783333	0.01252	1.97102	0.048721	0/+
CAPN11	THAP9-AS1	-0.18701	0.274779	-0.79672	0.010156	-1.97041	0.048792	0/-
RFX7	THAP9-AS1	0.073102	0.671786	0.75	0.019942	1.96905	0.048948	0/+
ARMH2	THAP9-AS1	0.334279	0.046302	-0.50208	0.168415	-1.96904	0.048948	#ERROR!
EIF4A1P7	THAP9-AS1	-0.12813	0.456448	0.647415	0.059417	1.96894	0.048961	0/0
LINC02323	THAP9-AS1	0.045964	0.790093	-0.69282	0.038554	-1.96824	0.04904	0/-
RIMKLA	THAP9-AS1	-0.29708	0.078488	0.531688	0.140683	1.96704	0.049178	0/0
ACTP1	THAP9-AS1	0.031371	0.855876	0.730297	0.025464	1.96524	0.049387	0/+
KLHDC7B	THAP9-AS1	0.006566	0.969682	-0.71197	0.031425	-1.96468	0.049451	0/-
PRDM9	THAP9-AS1	-0.3112	0.064676	0.519615	0.151641	1.96459	0.049461	0/0
ACTBP12	THAP9-AS1	-0.10855	0.528587	-0.76422	0.016495	-1.96374	0.04956	0/-
MYEOV	THAP9-AS1	0.201081	0.239608	-0.6	0.087623	-1.9631	0.049634	0/0
LINC00605	THAP9-AS1	-0.18424	0.282073	0.610884	0.080542	1.96243	0.049712	0/0
LOC105369203	THAP9-AS1	-0.03302	0.848395	-0.7303	0.025464	-1.96163	0.049806	0/-
MIR1915	THAP9-AS1	0.382881	0.021177	-0.45644	0.216838	-1.9614	0.049832	#ERROR!
QRICH2	THAP9-AS1	-0.12021	0.484977	0.65	0.058073	1.96109	0.049868	0/0
GUCA2B	THAP9-AS1	-0.44008	0.007233	0.4	0.286105	1.96086	0.049895	-/0
EPS15L1	THAP9-AS1	0.294466	0.081276	0.833333	0.005266	1.9598	0.050019	0/+
LOC105375095	THAP9-AS1	-0.0904	0.600027	0.666667	0.049867	1.95952	0.050051	0/+
PIBF1	THAP9-AS1	0.246589	0.147109	0.816667	0.007225	1.9586	0.05016	0/+
KLHDC7A	THAP9-AS1	-0.33205	0.047872	0.5	0.170471	1.95747	0.050292	-/0
CYP2G1P	THAP9-AS1	0.149618	0.383786	0.779773	0.013205	1.95661	0.050393	0/+
GTF2F1	THAP9-AS1	0.117632	0.494442	0.766667	0.015944	1.95655	0.050401	0/+
FOXA1	THAP9-AS1	-0.29035	0.085828	0.533333	0.139227	1.95595	0.050471	0/0
LINC02145	THAP9-AS1	0.013138	0.939378	-0.70654	0.033349	-1.95518	0.050562	0/-
NFE4	THAP9-AS1	0.112203	0.51471	0.76399	0.016546	1.95445	0.050648	0/+
HRG	THAP9-AS1	-0.33078	0.04878	0.5	0.170471	1.95436	0.050659	-/0
AOC4P	THAP9-AS1	-0.08806	0.609552	0.666667	0.049867	1.95435	0.050659	0/+
PIH1D2	THAP9-AS1	0.077992	0.651176	0.749106	0.020174	1.95382	0.050723	0/+
CEROX1	THAP9-AS1	0.153945	0.370021	-0.62762	0.070365	-1.95359	0.05075	0/0
BRI3	THAP9-AS1	-0.08752	0.611776	0.666667	0.049867	1.95315	0.050802	0/+
LINC01425	THAP9-AS1	0.308726	0.066948	-0.51755	0.153564	-1.95241	0.050889	0/0
LOC101927060	THAP9-AS1	-0.02832	0.869785	0.697504	0.036722	1.9494	0.051248	0/+
LETMD1	THAP9-AS1	0.121236	0.481217	0.766667	0.015944	1.94855	0.051349	0/+
CTAG1A	THAP9-AS1	0.268476	0.113369	-0.54772	0.12687	-1.94852	0.051353	0/0
LCORL	THAP9-AS1	0.162173	0.344674	0.783333	0.01252	1.94847	0.051358	0/+
CDKN1B	THAP9-AS1	0.299356	0.076117	0.833333	0.005266	1.94806	0.051407	0/+
CCNG1	THAP9-AS1	-0.19434	0.256065	0.6	0.087623	1.94774	0.051446	0/0
DCUN1D4	THAP9-AS1	0.205663	0.228844	0.8	0.009628	1.94771	0.051449	0/+
FBXW10	THAP9-AS1	0.041779	0.808833	0.731118	0.025215	1.94629	0.05162	0/+
DDX54	THAP9-AS1	-0.0538	0.755334	0.683333	0.042442	1.94599	0.051655	0/+
NPM1P40	THAP9-AS1	0.305565	0.069938	-0.51793	0.153206	-1.94592	0.051664	0/0
CCL28	THAP9-AS1	-0.11326	0.510719	0.65	0.058073	1.94569	0.051692	0/0
RARS2	THAP9-AS1	0.046847	0.786153	0.733333	0.024554	1.94562	0.0517	0/+
OGG1	THAP9-AS1	0.351911	0.035308	0.85	0.003705	1.94455	0.051829	#ERROR!
FGD4	THAP9-AS1	-0.0834	0.628691	0.666667	0.049867	1.94407	0.051887	0/+
ADCK1	THAP9-AS1	0.012613	0.9418	0.716667	0.029818	1.94371	0.051931	0/+
PIK3R4	THAP9-AS1	0.164618	0.337349	0.783333	0.01252	1.94298	0.052019	0/+
LSMEM2	THAP9-AS1	-0.16938	0.323372	0.614887	0.07803	1.94288	0.05203	0/0
CDC42EP4	THAP9-AS1	0.12381	0.471885	0.766667	0.015944	1.94283	0.052037	0/+
MIGA1	THAP9-AS1	-0.16654	0.331665	0.616667	0.076929	1.94276	0.052045	0/0
ACIN1	THAP9-AS1	0.352638	0.034905	0.85	0.003705	1.94273	0.052048	#ERROR!
ERFE	THAP9-AS1	0.051632	0.764895	-0.68333	0.042442	-1.94124	0.052229	0/-
IER3-AS1	THAP9-AS1	0.144507	0.40042	-0.62993	0.069028	-1.94082	0.05228	0/0
RN7SL738P	THAP9-AS1	-0.09627	0.576459	0.658336	0.053869	1.93999	0.052381	0/0
DBF4B	THAP9-AS1	0.264607	0.118864	0.820091	0.006788	1.9391	0.052489	0/+
AKR1A1	THAP9-AS1	-0.23861	0.161073	0.566667	0.111633	1.93879	0.052527	0/0
LRRC24	THAP9-AS1	-0.26427	0.119353	0.547723	0.12687	1.93861	0.052549	0/0
PDE4A	THAP9-AS1	0.303732	0.07172	-0.51667	0.15439	-1.93772	0.052658	0/0
MOV10	THAP9-AS1	-0.10914	0.526333	0.65	0.058073	1.93655	0.052801	0/0
IGHV3-38	THAP9-AS1	0.180093	0.293236	-0.6061	0.083607	-1.93643	0.052815	0/0
CBLN3	THAP9-AS1	0.168082	0.327137	0.783333	0.01252	1.93518	0.052968	0/+
FBXO21	THAP9-AS1	0.16834	0.326386	0.783333	0.01252	1.9346	0.05304	0/+
CPPED1	THAP9-AS1	-0.28134	0.096468	0.533333	0.139227	1.93448	0.053054	0/0
EXOC3-AS1	THAP9-AS1	-0.04854	0.778632	0.683333	0.042442	1.93445	0.053058	0/+
CASKIN1	THAP9-AS1	0.091996	0.593596	-0.65924	0.053424	-1.93405	0.053107	0/0
NUP85	THAP9-AS1	0.257433	0.129578	0.816667	0.007225	1.93326	0.053205	0/+
MGME1	THAP9-AS1	0.05251	0.761014	0.733333	0.024554	1.9332	0.053212	0/+
ANKRD22	THAP9-AS1	0.131034	0.44621	-0.63599	0.065595	-1.93289	0.05325	0/0
LNPEP	THAP9-AS1	0.096782	0.574442	0.753145	0.019142	1.93266	0.053278	0/+
RIIAD1	THAP9-AS1	0.373792	0.024723	-0.45434	0.219221	-1.93242	0.053308	#ERROR!
LOC284241	THAP9-AS1	0.000419	0.998067	-0.70747	0.033013	-1.93142	0.053431	0/-
GOLGA8A	THAP9-AS1	0.321236	0.056086	-0.5	0.170471	-1.93098	0.053485	0/0
KIAA0232	THAP9-AS1	0.129472	0.451694	0.766667	0.015944	1.93023	0.053578	0/+
LOC389602	THAP9-AS1	-0.59099	0.000148	0.2	0.605901	1.93009	0.053596	-/0
JKAMP	THAP9-AS1	0.054054	0.754199	0.733333	0.024554	1.92981	0.05363	0/+
HSPB11	THAP9-AS1	0.019048	0.912201	0.716667	0.029818	1.92962	0.053654	0/+
PPP1R2B	THAP9-AS1	0.000418	0.99807	0.707475	0.033013	1.92959	0.053658	0/+
RBM22	THAP9-AS1	0.145431	0.397383	0.773137	0.014549	1.92941	0.053681	0/+
LOC442292	THAP9-AS1	-0.10136	0.556381	0.652636	0.056722	1.92936	0.053686	0/0
PHF19	THAP9-AS1	0.394852	0.017161	-0.43333	0.243952	-1.92923	0.053702	#ERROR!
ERMARD	THAP9-AS1	0.358196	0.031947	0.85	0.003705	1.92881	0.053754	#ERROR!
ADAMTS8	THAP9-AS1	-0.19451	0.255628	0.594147	0.091583	1.92824	0.053826	0/0
MIR3198-1	THAP9-AS1	0.259851	0.125891	-0.54772	0.12687	-1.92823	0.053827	0/0
NELFE	THAP9-AS1	0.318404	0.058412	0.836827	0.004907	1.92725	0.053949	0/+
APTR	THAP9-AS1	0.15947	0.352881	0.778249	0.013506	1.92604	0.054099	0/+
NEO1	THAP9-AS1	-0.15907	0.354095	0.616667	0.076929	1.92598	0.054107	0/0
GSK3B	THAP9-AS1	-0.04427	0.797651	0.683333	0.042442	1.9251	0.054217	0/+
FBXW8	THAP9-AS1	-0.20901	0.221193	0.583333	0.099186	1.92509	0.054219	0/0
LINC00271	THAP9-AS1	0.119678	0.48691	0.761513	0.017117	1.9249	0.054241	0/+
KIAA2026	THAP9-AS1	0.371171	0.025832	0.853564	0.003418	1.92448	0.054295	#ERROR!
ADGRF5P1	THAP9-AS1	0.460803	0.00468	-0.36353	0.336208	-1.9243	0.054317	#ERROR!
BPTF	THAP9-AS1	0.021623	0.900386	0.716667	0.029818	1.92398	0.054357	0/+
NRAS	THAP9-AS1	-0.39279	0.017802	0.433333	0.243952	1.92389	0.054368	-/0
ATG14	THAP9-AS1	0.216101	0.20556	0.8	0.009628	1.9238	0.054379	0/+
ARHGEF10L	THAP9-AS1	-0.10322	0.549138	0.65	0.058073	1.92344	0.054424	0/0
RN7SL364P	THAP9-AS1	0.257696	0.129173	-0.54772	0.12687	-1.92317	0.054458	0/0
NBEAL2	THAP9-AS1	0.621364	5.25e-05	-0.15	0.700094	-1.9223	0.054567	#ERROR!
NAPA	THAP9-AS1	-0.2314	0.174485	0.566667	0.111633	1.9221	0.054593	0/0
LOC105375614	THAP9-AS1	0.201369	0.238922	-0.58765	0.096104	-1.92202	0.054603	0/0
GLRX5	THAP9-AS1	-0.07336	0.670695	0.666667	0.049867	1.92197	0.05461	0/+
LINC02518	THAP9-AS1	-0.21376	0.210632	0.579066	0.102288	1.92187	0.054622	0/0
COBL	THAP9-AS1	-0.01081	0.950103	0.7	0.03577	1.92175	0.054637	0/+
FRMD1	THAP9-AS1	-0.07777	0.652128	0.66398	0.051136	1.92111	0.054717	0/0
MTX1P1	THAP9-AS1	-0.09242	0.591871	0.655485	0.055284	1.92051	0.054793	0/0
JADE3	THAP9-AS1	0.1345	0.434165	0.766667	0.015944	1.91904	0.05498	0/+
CLCA4-AS1	THAP9-AS1	-0.25466	0.133913	0.548567	0.126166	1.91869	0.055023	0/0
LINC02037	THAP9-AS1	-0.35255	0.034951	0.468623	0.203236	1.91858	0.055037	-/0
HNRNPH1P1	THAP9-AS1	0.010354	0.952208	0.709635	0.032243	1.91734	0.055195	0/+
RNF128	THAP9-AS1	-0.25199	0.138166	0.55	0.124977	1.91696	0.055243	0/0
CT69	THAP9-AS1	-0.16401	0.339166	0.610884	0.080542	1.91677	0.055268	0/0
MED19	THAP9-AS1	0.135787	0.429739	0.766667	0.015944	1.91617	0.055344	0/+
NTPCR	THAP9-AS1	-0.15444	0.368466	0.616667	0.076929	1.91559	0.055418	0/0
CYP26A1	THAP9-AS1	0.026078	0.879998	0.716667	0.029818	1.91423	0.055591	0/+
PCDHAC1	THAP9-AS1	-0.00142	0.993441	0.702935	0.03467	1.91385	0.05564	0/+
KLLN	THAP9-AS1	-0.10812	0.530213	0.644357	0.061033	1.91305	0.055742	0/0
CLCN5	THAP9-AS1	-0.4834	0.002821	0.333333	0.380713	1.91271	0.055785	-/0
APP	THAP9-AS1	-0.15315	0.372518	0.616667	0.076929	1.9127	0.055786	0/0
BBS10	THAP9-AS1	0.061909	0.719829	0.733333	0.024554	1.91256	0.055804	0/+
NUDT9	THAP9-AS1	0.062033	0.719287	0.733333	0.024554	1.91229	0.055839	0/+
GLYCTK	THAP9-AS1	-0.35215	0.035178	0.466667	0.205386	1.91208	0.055866	-/0
BDNF-AS	THAP9-AS1	0.365053	0.028583	0.85	0.003705	1.91155	0.055934	#ERROR!
PLEKHA5	THAP9-AS1	0.222022	0.193111	0.8	0.009628	1.91019	0.056108	0/+
CADM4	THAP9-AS1	0.332304	0.047689	-0.48333	0.18747	-1.91	0.056134	#ERROR!
FBXL12	THAP9-AS1	0.315356	0.061002	0.833333	0.005266	1.90939	0.056211	0/+
ENTPD5	THAP9-AS1	-0.12484	0.468179	0.633333	0.067086	1.90937	0.056214	0/0
DYNC2LI1	THAP9-AS1	-0.00515	0.976228	0.7	0.03577	1.90936	0.056216	0/+
CCDC150	THAP9-AS1	-0.17739	0.30065	0.6	0.087623	1.90934	0.056219	0/0
KRT12	THAP9-AS1	-0.25168	0.138668	0.547723	0.12687	1.9091	0.056249	0/0
LINC01545	THAP9-AS1	-0.22332	0.190455	0.568342	0.110342	1.90885	0.056281	0/0
FAM222B	THAP9-AS1	-0.06718	0.697052	0.666667	0.049867	1.90838	0.056342	0/+
FSIP1	THAP9-AS1	-0.03608	0.83453	0.683599	0.04233	1.90823	0.056362	0/+
OR56B1	THAP9-AS1	0.29022	0.085972	-0.51755	0.153564	-1.90792	0.056401	0/0
ARMT1	THAP9-AS1	-0.06692	0.698158	0.666667	0.049867	1.90781	0.056415	0/+
EMILIN3	THAP9-AS1	0.277377	0.101454	-0.5272	0.144699	-1.9064	0.056598	0/0
LINC00519	THAP9-AS1	0.250252	0.141004	-0.54772	0.12687	-1.90576	0.056682	0/0
MCOLN3	THAP9-AS1	-0.15907	0.354095	0.610884	0.080542	1.90568	0.056692	0/0
GTF2IP14	THAP9-AS1	0.122849	0.475356	0.759072	0.017692	1.9052	0.056754	0/+
APOA1	THAP9-AS1	-0.46608	0.00417	0.35	0.35582	1.90509	0.056768	-/0
ASB16	THAP9-AS1	0.202755	0.235637	0.791669	0.01101	1.90462	0.05683	0/+
IGHEP2	THAP9-AS1	-0.01667	0.923108	0.69282	0.038554	1.90407	0.0569	0/+
GPR179	THAP9-AS1	-0.09189	0.594035	0.651404	0.057351	1.90374	0.056944	0/0
OSGIN1	THAP9-AS1	-0.30991	0.065854	0.5	0.170471	1.90346	0.056981	0/0
CLDN3	THAP9-AS1	-0.12124	0.481217	0.633333	0.067086	1.90137	0.057254	0/0
CRYBA4	THAP9-AS1	0.239181	0.160044	-0.55448	0.121299	-1.90123	0.057272	0/0
NUDCD3	THAP9-AS1	0.183526	0.283976	0.783333	0.01252	1.9003	0.057394	0/+
BAIAP2	THAP9-AS1	-0.24479	0.150182	0.55	0.124977	1.90015	0.057413	0/0
POLRMT	THAP9-AS1	0.319176	0.05777	0.833333	0.005266	1.9001	0.05742	0/+
EVA1A	THAP9-AS1	-0.12008	0.48542	0.633333	0.067086	1.89881	0.057589	0/0
ARID4B	THAP9-AS1	0.227027	0.183007	0.8	0.009628	1.89866	0.057609	0/+
KMT2C	THAP9-AS1	-0.000257	0.998811	0.7	0.03577	1.89865	0.05761	0/+
APOB	THAP9-AS1	-0.53282	0.000821	0.266667	0.487922	1.89819	0.057671	-/0
PRPF40B	THAP9-AS1	0.214157	0.209767	0.794986	0.010445	1.89812	0.057681	0/+
CHAF1A	THAP9-AS1	0.033462	0.846379	0.716667	0.029818	1.89805	0.057689	0/+
DLL3	THAP9-AS1	0.24683	0.146703	-0.54772	0.12687	-1.89777	0.057726	0/0
CCDC152	THAP9-AS1	0.033852	0.844608	0.716667	0.029818	1.8972	0.057802	0/+
APOC3	THAP9-AS1	-0.44779	0.00617	0.366667	0.33174	1.89634	0.057915	-/0
DPP4-DT	THAP9-AS1	-0.01217	0.943839	0.693103	0.038441	1.89541	0.058039	0/+
CLSTN2-AS1	THAP9-AS1	-0.2456	0.148786	0.547723	0.12687	1.89492	0.058103	0/0
LINC00543	THAP9-AS1	-0.12744	0.458894	0.627621	0.070365	1.8944	0.058172	0/0
BRAP	THAP9-AS1	-0.06075	0.724866	0.666667	0.049867	1.89425	0.058192	0/+
HNRNPA1P70	THAP9-AS1	-0.00801	0.963042	0.694879	0.037741	1.89379	0.058253	0/+
LRRC8D	THAP9-AS1	-0.1704	0.320416	0.6	0.087623	1.89355	0.058285	0/0
PKD1P6-NPIPP1	THAP9-AS1	0.354434	0.033926	-0.45769	0.215412	-1.89282	0.058381	#ERROR!
MAT2B	THAP9-AS1	0.229601	0.177959	0.8	0.009628	1.89271	0.058396	0/+
KCNG1	THAP9-AS1	0.337366	0.0442	-0.47261	0.19889	-1.89206	0.058483	#ERROR!
GID4	THAP9-AS1	0.322693	0.054917	0.833333	0.005266	1.89152	0.058555	0/+
CCDC126	THAP9-AS1	0.372973	0.025065	0.85	0.003705	1.89148	0.05856	#ERROR!
ASPA	THAP9-AS1	-0.14364	0.403288	0.616667	0.076929	1.89141	0.05857	0/0
ITPRIPL1	THAP9-AS1	0.271001	0.109887	-0.5272	0.144699	-1.89132	0.058582	0/0
MYCL	THAP9-AS1	0.108366	0.529281	0.75	0.019942	1.89122	0.058595	0/+
NADK2	THAP9-AS1	-0.28391	0.09333	0.516667	0.15439	1.89024	0.058726	0/0
BCL7C	THAP9-AS1	0.343372	0.040332	-0.46667	0.205386	-1.89023	0.058727	#ERROR!
PRAF2	THAP9-AS1	0.396911	0.016539	-0.41667	0.264586	-1.89006	0.058751	#ERROR!
DOC2B	THAP9-AS1	0.193565	0.257996	-0.58333	0.099186	-1.88986	0.058777	0/0
IMMP1L	THAP9-AS1	0.309326	0.066391	0.828459	0.005795	1.88956	0.058817	0/+
RABEPK	THAP9-AS1	0.323851	0.054002	-0.48333	0.18747	-1.88927	0.058856	0/0
GLIPR1L2	THAP9-AS1	0.236915	0.164158	-0.55231	0.123077	-1.88911	0.058877	0/0
C18orf21	THAP9-AS1	0.231675	0.173965	0.8	0.009628	1.88792	0.059037	0/+
MAGEB17	THAP9-AS1	-0.05036	0.770532	0.67082	0.047945	1.88788	0.059042	0/+
LOC100422562	THAP9-AS1	0.24241	0.154308	-0.54772	0.12687	-1.88749	0.059095	0/0
C8orf49	THAP9-AS1	-0.0865	0.615918	0.65	0.058073	1.88653	0.059223	0/0
MAFB	THAP9-AS1	-0.11429	0.506886	0.633333	0.067086	1.88594	0.059303	0/0
IGKV2D-24	THAP9-AS1	0.180897	0.291052	-0.59076	0.093922	-1.88594	0.059303	0/0
ITGB1BP2	THAP9-AS1	0.089844	0.602299	0.740593	0.022467	1.88584	0.059316	0/+
GATC	THAP9-AS1	-0.27902	0.09936	0.518833	0.152367	1.8851	0.059417	0/0
CRNKL1	THAP9-AS1	0.325354	0.052834	0.833333	0.005266	1.88501	0.059428	0/+
IFIT3	THAP9-AS1	-0.05625	0.744559	0.666667	0.049867	1.88435	0.059517	0/+
MPHOSPH9	THAP9-AS1	-0.16591	0.333532	0.6	0.087623	1.88343	0.059643	0/0
GTF3C2	THAP9-AS1	0.040927	0.812662	0.716667	0.029818	1.88169	0.059878	0/+
MIR6889	THAP9-AS1	0.39965	0.015741	-0.41079	0.272071	-1.88167	0.059881	#ERROR!
GSTO3P	THAP9-AS1	-0.23985	0.158846	0.547723	0.12687	1.88153	0.059899	0/0
PCDHA12	THAP9-AS1	0.041075	0.811996	0.716667	0.029818	1.88137	0.059922	0/+
IQCC	THAP9-AS1	0.167021	0.330245	0.773137	0.014549	1.88097	0.059976	0/+
DHRS4L1	THAP9-AS1	-0.05366	0.755935	0.666667	0.049867	1.87868	0.060288	0/+
ANKRD6	THAP9-AS1	0.00901	0.958409	0.7	0.03577	1.87837	0.06033	0/+
RNASEH1P2	THAP9-AS1	-0.23841	0.161429	0.547723	0.12687	1.8782	0.060353	0/0
KATNAL2	THAP9-AS1	0.066289	0.700889	0.72804	0.026154	1.87808	0.06037	0/+
LIN54	THAP9-AS1	0.328185	0.050687	0.833333	0.005266	1.87807	0.060371	0/+
DIPK1A	THAP9-AS1	0.153034	0.372894	0.766667	0.015944	1.87762	0.060434	0/+
HOXC13-AS	THAP9-AS1	0.23813	0.161942	-0.54772	0.12687	-1.87755	0.060443	0/0
GPD1	THAP9-AS1	-0.49923	0.001938	0.3	0.432845	1.87729	0.060478	-/0
IGKV2D-30	THAP9-AS1	0.304478	0.070991	-0.49507	0.1754	-1.876	0.060655	0/0
MIR3936HG	THAP9-AS1	0.010425	0.95188	0.7	0.03577	1.87527	0.060755	0/+
NAT2	THAP9-AS1	-0.40758	0.01361	0.4	0.286105	1.87414	0.060911	-/0
ABCC4	THAP9-AS1	-0.21055	0.217721	0.566667	0.111633	1.87412	0.060913	0/0
MAP3K4	THAP9-AS1	0.432947	0.008353	0.866667	0.002495	1.87338	0.061016	#ERROR!
CMPK1	THAP9-AS1	-0.2332	0.17106	0.55	0.124977	1.87327	0.061032	0/0
AK2	THAP9-AS1	-0.08019	0.642016	0.65	0.058073	1.87261	0.061123	0/0
LOC105374171	THAP9-AS1	-0.23593	0.165964	0.547723	0.12687	1.87245	0.061144	0/0
C2orf66	THAP9-AS1	0.345627	0.038952	-0.45817	0.214871	-1.87218	0.061181	#ERROR!
IFNWP19	THAP9-AS1	0.392253	0.017973	-0.41404	0.26792	-1.87103	0.061341	#ERROR!
CYP2A6	THAP9-AS1	-0.31626	0.060221	0.483333	0.18747	1.87077	0.061377	0/0
MUTYH	THAP9-AS1	0.081081	0.638289	0.733333	0.024554	1.87039	0.06143	0/+
CR2	THAP9-AS1	0.135423	0.430989	-0.61559	0.077596	-1.86926	0.061586	0/0
KDM4A	THAP9-AS1	-0.20824	0.222943	0.566667	0.111633	1.86882	0.061648	0/0
PLEKHA6	THAP9-AS1	0.013385	0.938243	0.7	0.03577	1.8688	0.061651	0/+
GCNT1P3	THAP9-AS1	0.070774	0.681678	0.72804	0.026154	1.86822	0.061732	0/+
HOXA4	THAP9-AS1	0.41847	0.011086	-0.38657	0.304082	-1.8681	0.061749	#ERROR!
PSMC5	THAP9-AS1	0.014157	0.934688	0.7	0.03577	1.86711	0.061887	0/+
C6orf201	THAP9-AS1	0.0093	0.957069	0.697504	0.036722	1.86706	0.061893	0/+
LINC01012	THAP9-AS1	0.088211	0.608942	0.735927	0.023795	1.867	0.061902	0/+
CD177	THAP9-AS1	0.029224	0.865644	0.707475	0.033013	1.86653	0.061968	0/+
KAT14	THAP9-AS1	-0.10502	0.542148	0.633333	0.067086	1.86542	0.062123	0/0
PATE4	THAP9-AS1	0.07689	0.655799	0.730297	0.025464	1.86531	0.062138	0/+
HS1BP3	THAP9-AS1	-0.04736	0.783858	0.666667	0.049867	1.86486	0.062201	0/+
MIR4538	THAP9-AS1	0.095325	0.580245	-0.63901	0.063924	-1.86485	0.062202	0/0
HORMAD2-AS1	THAP9-AS1	-0.53431	0.000789	0.25	0.51649	1.86367	0.062368	-/0
MAP10	THAP9-AS1	-0.04607	0.789598	0.666667	0.049867	1.86204	0.062598	0/+
LINC02292	THAP9-AS1	-0.42426	0.009914	0.378165	0.315613	1.86195	0.06261	-/0
FIGNL2	THAP9-AS1	0.08481	0.622867	-0.64436	0.061033	-1.86155	0.062667	0/0
POLG2	THAP9-AS1	0.288049	0.088452	0.816667	0.007225	1.86086	0.062764	0/+
RNF213	THAP9-AS1	-0.20463	0.231234	0.566667	0.111633	1.86058	0.062803	0/0
GON7	THAP9-AS1	0.017248	0.920469	0.7	0.03577	1.86034	0.062837	0/+
DDAH2	THAP9-AS1	0.176834	0.302204	-0.58578	0.097434	-1.86007	0.062875	0/0
LOC101927845	THAP9-AS1	-0.26972	0.111641	0.517549	0.153564	1.85924	0.062993	0/0
LOC101929705	THAP9-AS1	-0.01364	0.937058	0.683599	0.04233	1.8591	0.063014	0/+
CFAP44	THAP9-AS1	0.385997	0.020063	0.85	0.003705	1.85818	0.063143	#ERROR!
GRPEL2	THAP9-AS1	-0.00772	0.964348	0.686198	0.041242	1.85685	0.063332	0/+
GPR75	THAP9-AS1	-0.03862	0.823071	0.669462	0.048568	1.85673	0.06335	0/+
NUP214	THAP9-AS1	0.202831	0.235457	0.783333	0.01252	1.85641	0.063395	0/+
LOC100420254	THAP9-AS1	0.268476	0.113369	-0.51755	0.153564	-1.85631	0.06341	0/0
PCDH15	THAP9-AS1	-0.07742	0.653593	0.647261	0.059498	1.85616	0.063431	0/0
KTN1-AS1	THAP9-AS1	0.087679	0.611112	0.733333	0.024554	1.85584	0.063476	0/+
CCDC9B	THAP9-AS1	0.124839	0.468179	0.75	0.019942	1.85467	0.063643	0/+
LIAS	THAP9-AS1	0.124847	0.46815	0.75	0.019942	1.85465	0.063646	0/+
LINC01166	THAP9-AS1	0.140797	0.412752	0.756978	0.018196	1.85445	0.063674	0/+
CEPT1	THAP9-AS1	0.059717	0.729369	0.719672	0.028819	1.85405	0.063732	0/+
LOC105373100	THAP9-AS1	-0.01191	0.945039	0.683202	0.042498	1.85367	0.063786	0/+
ABI2	THAP9-AS1	0.163707	0.340068	0.766667	0.015944	1.85366	0.063788	0/+
IFITM2	THAP9-AS1	0.28906	0.08729	-0.5	0.170471	-1.85333	0.063835	0/0
DGCR5	THAP9-AS1	-0.36311	0.029505	0.435194	0.241704	1.85312	0.063866	-/0
MSRB1	THAP9-AS1	-0.36474	0.028731	0.433333	0.243952	1.8522	0.063997	-/0
GABARAPL3	THAP9-AS1	-0.0711	0.680271	-0.72457	0.027239	-1.85141	0.06411	0/-
LOC100859919	THAP9-AS1	0.226563	0.183927	-0.54772	0.12687	-1.85079	0.0642	0/0
ESF1	THAP9-AS1	0.19305	0.259289	0.778249	0.013506	1.85019	0.064286	0/+
ABHD4	THAP9-AS1	0.165251	0.335469	0.766667	0.015944	1.85018	0.064287	0/+
CHP1P2	THAP9-AS1	0.090499	0.599644	0.733333	0.024554	1.84962	0.064368	0/+
ATF7IP	THAP9-AS1	0.090605	0.599217	0.733333	0.024554	1.84939	0.064402	0/+
PTF1A	THAP9-AS1	0.225576	0.185897	-0.54772	0.12687	-1.84851	0.064529	0/0
QRICH1	THAP9-AS1	0.340283	0.042286	0.833333	0.005266	1.84827	0.064564	#ERROR!
PMS2	THAP9-AS1	-0.00901	0.958411	0.683333	0.042442	1.84786	0.064622	0/+
CD1D	THAP9-AS1	-0.12408	0.470899	0.616667	0.076929	1.84783	0.064627	0/0
LOC100507250	THAP9-AS1	0.465064	0.004264	-0.32774	0.389242	-1.84721	0.064717	#ERROR!
LINC01362	THAP9-AS1	0.085471	0.62015	0.730297	0.025464	1.8464	0.064834	0/+
CORO7	THAP9-AS1	0.429344	0.008973	-0.36667	0.33174	-1.84635	0.064841	#ERROR!
CEP72	THAP9-AS1	0.092407	0.591943	0.733333	0.024554	1.84541	0.064978	0/+
BHLHE41	THAP9-AS1	0.092407	0.591943	0.733333	0.024554	1.84541	0.064978	0/+
BMP7	THAP9-AS1	0.356734	0.032705	-0.43825	0.238036	-1.84535	0.064987	#ERROR!
PAFAH1B3	THAP9-AS1	0.28314	0.094263	-0.5021	0.168397	-1.84534	0.064988	0/0
ATP5PO	THAP9-AS1	-0.00772	0.964348	0.683333	0.042442	1.84505	0.065031	0/+
FAM170A	THAP9-AS1	-0.18896	0.269721	0.572838	0.10692	1.84489	0.065054	0/0
RAB3C	THAP9-AS1	-0.06391	0.711175	-0.71967	0.028819	-1.84485	0.06506	0/-
HEATR4	THAP9-AS1	-0.00734	0.96611	0.683333	0.042442	1.84421	0.065152	0/+
PRUNE1	THAP9-AS1	0.208237	0.222943	0.783333	0.01252	1.84406	0.065174	0/+
PRRG4	THAP9-AS1	0.024968	0.885072	0.7	0.03577	1.84344	0.065265	0/+
CRABP1	THAP9-AS1	0.223121	0.190859	-0.54772	0.12687	-1.84285	0.06535	0/0
LOC107987032	THAP9-AS1	-0.26475	0.118657	0.515879	0.155129	1.84254	0.065396	0/0
BCL3	THAP9-AS1	0.241956	0.155105	-0.53333	0.139227	-1.84194	0.065484	0/0
FNBP1L	THAP9-AS1	-0.08983	0.602346	0.635989	0.065595	1.84159	0.065535	0/0
LOC101928674	THAP9-AS1	0.321783	0.055644	-0.46789	0.204043	-1.84053	0.065691	0/0
GRIN2C	THAP9-AS1	-0.09864	0.567103	0.630274	0.06883	1.84016	0.065745	0/0
OLA1P2	THAP9-AS1	0.076576	0.657119	0.724569	0.027239	1.83937	0.06586	0/+
HFM1	THAP9-AS1	0.242927	0.153404	-0.53169	0.140683	-1.83917	0.06589	0/0
BCL7A	THAP9-AS1	0.060493	0.725986	0.716667	0.029818	1.83876	0.06595	0/+
ALG1L9P	THAP9-AS1	0.137389	0.424266	0.752384	0.019333	1.8387	0.065959	0/+
DMXL2	THAP9-AS1	0.095495	0.579565	0.733333	0.024554	1.83859	0.065975	0/+
LINC00323	THAP9-AS1	0.365229	0.028501	-0.42762	0.250928	-1.83809	0.066049	#ERROR!
MIR3186	THAP9-AS1	0.042504	0.805578	0.707475	0.033013	1.83743	0.066147	0/+
LSM5	THAP9-AS1	0.330759	0.048796	0.828459	0.005795	1.8373	0.066166	#ERROR!
LINC02026	THAP9-AS1	-0.1253	0.466536	0.612905	0.079268	1.83729	0.066167	0/0
GZMAP1	THAP9-AS1	0.11221	0.514684	-0.62106	0.074253	-1.83706	0.066202	0/0
ELOVL7	THAP9-AS1	-0.21725	0.203111	0.55	0.124977	1.83647	0.066288	0/0
PRCC	THAP9-AS1	0.133076	0.439092	0.75	0.019942	1.83634	0.066307	0/+
ANKRD2	THAP9-AS1	-0.09244	0.591823	0.632962	0.067296	1.83625	0.066321	0/0
NPIPB14P	THAP9-AS1	-0.0237	0.89089	0.672293	0.047275	1.83531	0.066459	0/+
RNU2-28P	THAP9-AS1	-0.28391	0.093335	0.497955	0.172507	1.83509	0.066493	0/0
EID2	THAP9-AS1	0.254457	0.134228	0.8	0.009628	1.83493	0.066516	0/+
DOK6	THAP9-AS1	0.117904	0.493435	-0.61667	0.076929	-1.83411	0.066638	0/0
DRAM1	THAP9-AS1	-0.37503	0.024212	0.416667	0.264586	1.83379	0.066686	-/0
GRAMD4	THAP9-AS1	0.002574	0.988113	-0.68333	0.042442	-1.83378	0.066687	0/-
HYPK	THAP9-AS1	0.180215	0.292905	0.769881	0.01524	1.8336	0.066714	0/+
QRSL1P1	THAP9-AS1	-0.34964	0.036593	0.440386	0.235491	1.8334	0.066743	-/0
LINC02245	THAP9-AS1	0.044657	0.795932	0.707475	0.033013	1.83271	0.066846	0/+
ORC4	THAP9-AS1	0.213642	0.210891	0.783333	0.01252	1.83168	0.066999	0/+
PKD1L2	THAP9-AS1	-0.00154	0.992866	0.683333	0.042442	1.83153	0.067022	0/+
KATNIP	THAP9-AS1	0.201287	0.239117	0.778249	0.013506	1.83143	0.067036	0/+
LMX1B	THAP9-AS1	0.002575	0.98811	-0.68273	0.042699	-1.83129	0.067057	0/-
HAGLR	THAP9-AS1	0.130827	0.446935	-0.60764	0.082612	-1.83125	0.067064	0/0
PFKFB1	THAP9-AS1	-0.27942	0.098855	0.5	0.170471	1.83038	0.067193	0/0
PLA2G3	THAP9-AS1	-0.2571	0.130091	0.517549	0.153564	1.82956	0.067315	0/0
BAAT	THAP9-AS1	-0.43861	0.007453	0.35	0.35582	1.82949	0.067327	-/0
CNTN5	THAP9-AS1	-0.3425	0.040878	0.445394	0.22958	1.82928	0.067358	-/0
CYP4F35P	THAP9-AS1	0.283635	0.093665	-0.49612	0.174345	-1.8291	0.067384	0/0
ADAMTS7P1	THAP9-AS1	0.22293	0.191249	-0.54343	0.130484	-1.82904	0.067394	0/0
LOC105370791	THAP9-AS1	0.379145	0.022579	-0.41079	0.272071	-1.82877	0.067435	#ERROR!
LOC374443	THAP9-AS1	0.388056	0.019354	-0.40168	0.2839	-1.82774	0.067588	#ERROR!
CFHR1	THAP9-AS1	-0.23539	0.166979	0.533333	0.139227	1.82669	0.067747	0/0
GBP7	THAP9-AS1	-0.40539	0.014173	0.383333	0.308495	1.82531	0.067954	-/0
ARL10	THAP9-AS1	0.314563	0.06169	-0.46862	0.203236	-1.82501	0.068	0/0
FOLH1B	THAP9-AS1	-0.38825	0.019289	0.4	0.286105	1.82386	0.068173	-/0
NEK2	THAP9-AS1	0.198456	0.245928	-0.5594	0.117338	-1.82321	0.068271	0/0
GSTM4	THAP9-AS1	0.034234	0.842877	0.7	0.03577	1.82314	0.068282	0/+
CASP16P	THAP9-AS1	-0.25547	0.132635	0.516667	0.15439	1.8231	0.068288	0/0
NR0B2	THAP9-AS1	-0.18816	0.271783	0.566667	0.111633	1.82308	0.068291	0/0
ANAPC13	THAP9-AS1	0.067696	0.694841	0.716667	0.029818	1.82293	0.068314	0/+
DISP2	THAP9-AS1	-0.23068	0.175882	0.53557	0.137262	1.82264	0.068358	0/0
KCNK13	THAP9-AS1	-0.02781	0.8721	0.666667	0.049867	1.82201	0.068454	0/+
HAAO	THAP9-AS1	-0.38741	0.019573	0.4	0.286105	1.82171	0.068499	-/0
LOC101927543	THAP9-AS1	0.085054	0.621865	-0.63305	0.067244	-1.8203	0.068713	0/0
REV1	THAP9-AS1	0.103996	0.546111	0.733333	0.024554	1.8198	0.068789	0/+
CYP4A22	THAP9-AS1	-0.23199	0.173359	0.533333	0.139227	1.81883	0.068937	0/0
C17orf80	THAP9-AS1	0.036293	0.833555	0.7	0.03577	1.81863	0.068968	0/+
ANKIB1	THAP9-AS1	0.036551	0.832391	0.7	0.03577	1.81806	0.069054	0/+
EPOP	THAP9-AS1	0.083532	0.628137	-0.63333	0.067086	-1.81797	0.069069	0/0
MTND5P2	THAP9-AS1	0.21177	0.215014	-0.54772	0.12687	-1.81678	0.069251	0/0
NAPB	THAP9-AS1	0.353199	0.034597	0.833333	0.005266	1.81614	0.069349	#ERROR!
POLR2J4	THAP9-AS1	0.08328	0.629178	0.722715	0.02783	1.81609	0.069357	0/+
HAUS7	THAP9-AS1	0.385195	0.020345	-0.4	0.286105	-1.81601	0.069369	#ERROR!
PDIK1L	THAP9-AS1	0.307118	0.068456	0.816667	0.007225	1.81507	0.069513	0/+
MBD1	THAP9-AS1	0.221364	0.194467	0.783333	0.01252	1.81394	0.069687	0/+
CD5	THAP9-AS1	0.134664	0.433602	-0.6	0.087623	-1.81347	0.06976	0/0
RN7SL760P	THAP9-AS1	0.088491	0.607799	0.724569	0.027239	1.81312	0.069813	0/+
ELOBP2	THAP9-AS1	-0.12861	0.454726	0.603807	0.085104	1.81306	0.069823	0/0
MTCYBP19	THAP9-AS1	-0.21012	0.218685	0.547723	0.12687	1.813	0.069831	0/0
LAMTOR3	THAP9-AS1	0.308108	0.067524	0.816667	0.007225	1.81268	0.069882	0/+
MFSD10	THAP9-AS1	0.476705	0.003289	-0.3	0.432845	-1.81259	0.069895	#ERROR!
ATP2B3	THAP9-AS1	0.478234	0.003176	-0.29814	0.435839	-1.81246	0.069915	#ERROR!
CALN1	THAP9-AS1	-0.10813	0.530174	0.616667	0.076929	1.81244	0.069918	0/0
CREM	THAP9-AS1	0.330544	0.048951	-0.45	0.224216	-1.81239	0.069926	#ERROR!
ATF7	THAP9-AS1	0.143887	0.402468	0.75	0.019942	1.81222	0.069952	0/+
LOC400036	THAP9-AS1	0.209603	0.219853	-0.54772	0.12687	-1.81182	0.070015	0/0
LOC105371795	THAP9-AS1	-0.11511	0.503807	0.61206	0.079799	1.81171	0.070031	0/0
PEBP1	THAP9-AS1	-0.08031	0.641501	0.633333	0.067086	1.81087	0.070162	0/0
LPCAT4	THAP9-AS1	0.565766	0.000323	-0.18333	0.63682	-1.80924	0.070413	#ERROR!
MROH5	THAP9-AS1	0.048203	0.780113	0.703788	0.034355	1.80886	0.070473	0/+
FAM111A	THAP9-AS1	0.074131	0.667427	0.716667	0.029818	1.80878	0.070486	0/+
PEX11G	THAP9-AS1	-0.15755	0.358785	0.583333	0.099186	1.80852	0.070525	0/0
CCDC62	THAP9-AS1	0.05418	0.753645	0.706543	0.033349	1.80774	0.070648	0/+
DALRD3	THAP9-AS1	0.40556	0.014129	0.85	0.003705	1.80741	0.070698	#ERROR!
ASMT	THAP9-AS1	0.103211	0.549165	0.730297	0.025464	1.80723	0.070726	0/+
BICRAL	THAP9-AS1	0.184299	0.28192	0.766667	0.015944	1.80718	0.070734	0/+
MVK	THAP9-AS1	-0.30943	0.066291	0.466667	0.205386	1.80709	0.070748	0/0
MTMR10	THAP9-AS1	0.074903	0.664164	0.716667	0.029818	1.80708	0.07075	0/+
NOX4	THAP9-AS1	0.395186	0.017059	-0.38657	0.304082	-1.80703	0.070758	#ERROR!
NUDT16L2P	THAP9-AS1	-0.10567	0.539636	0.616667	0.076929	1.80699	0.070764	0/0
GDAP1	THAP9-AS1	-0.20427	0.232073	0.55	0.124977	1.80676	0.070799	0/0
HMCN2	THAP9-AS1	0.009784	0.954835	0.683333	0.042442	1.80673	0.070804	0/+
AFDN	THAP9-AS1	0.10991	0.523393	0.733333	0.024554	1.80671	0.070808	0/+
KMT2E	THAP9-AS1	0.110167	0.522415	0.733333	0.024554	1.80614	0.070897	0/+
IL24	THAP9-AS1	0.180496	0.292141	-0.56667	0.111633	-1.80572	0.070962	0/0
CENPW	THAP9-AS1	0.099247	0.564689	0.72804	0.026154	1.80545	0.071005	0/+
ACTR8	THAP9-AS1	0.185071	0.279873	0.766667	0.015944	1.80543	0.071007	0/+
DHRS13	THAP9-AS1	0.323444	0.054322	-0.4538	0.219846	-1.80543	0.071007	0/0
MAL2	THAP9-AS1	0.075933	0.659824	0.716667	0.029818	1.80481	0.071104	0/+
IER3	THAP9-AS1	0.203346	0.234245	-0.55	0.124977	-1.80464	0.07113	0/0
NCR2	THAP9-AS1	0.20619	0.227626	-0.54772	0.12687	-1.80401	0.07123	0/0
BMF	THAP9-AS1	0.514543	0.001325	-0.25	0.51649	-1.80399	0.071233	#ERROR!
NEB	THAP9-AS1	-0.26821	0.113739	0.5	0.170471	1.80386	0.071254	0/0
PRSS33	THAP9-AS1	0.245976	0.14815	-0.51755	0.153564	-1.80357	0.071298	0/0
METTL6	THAP9-AS1	0.344832	0.039434	0.828459	0.005795	1.80253	0.071461	#ERROR!
RNU1-151P	THAP9-AS1	0.093388	0.587998	0.724569	0.027239	1.80231	0.071496	0/+
AKR1C2	THAP9-AS1	-0.1547	0.367659	0.583333	0.099186	1.80212	0.071526	0/0
KRT16P3	THAP9-AS1	0.235778	0.166251	-0.5249	0.146784	-1.80197	0.07155	0/0
IFIH1	THAP9-AS1	-0.01853	0.91456	0.666667	0.049867	1.8017	0.071593	0/+
LINC00535	THAP9-AS1	-0.17854	0.297481	0.566667	0.111633	1.8013	0.071655	0/0
ANKRD31	THAP9-AS1	0.057154	0.740575	0.706543	0.033349	1.80121	0.07167	0/+
ERCC6	THAP9-AS1	0.227229	0.182608	0.783333	0.01252	1.80043	0.071793	0/+
RHEX	THAP9-AS1	-0.10196	0.554054	0.616667	0.076929	1.79878	0.072054	0/0
GFI1B	THAP9-AS1	0.233319	0.170844	-0.52562	0.146131	-1.79845	0.072106	0/0
PARVB	THAP9-AS1	0.244788	0.150182	-0.51667	0.15439	-1.79817	0.07215	0/0
RN7SL47P	THAP9-AS1	0.203391	0.234139	-0.54772	0.12687	-1.79761	0.072238	0/0
LCA5L	THAP9-AS1	-0.12719	0.45978	0.6	0.087623	1.79682	0.072364	0/0
ANKRD49	THAP9-AS1	0.361133	0.030468	0.833333	0.005266	1.79624	0.072457	#ERROR!
PTCSC2	THAP9-AS1	-0.20262	0.235949	0.547723	0.12687	1.79586	0.072517	0/0
HOPX	THAP9-AS1	0.39408	0.017399	-0.38333	0.308495	-1.79585	0.072519	#ERROR!
NTAN1P2	THAP9-AS1	0.142075	0.40848	0.74587	0.021026	1.79575	0.072534	0/+
CES1	THAP9-AS1	-0.45611	0.005176	0.316667	0.406397	1.7953	0.072606	-/0
C2orf49	THAP9-AS1	0.151619	0.377385	0.75	0.019942	1.79492	0.072666	0/+
PTMAP5	THAP9-AS1	0.510942	0.001451	-0.25	0.51649	-1.7933	0.072925	#ERROR!
PLA2G12B	THAP9-AS1	-0.35893	0.031573	0.416667	0.264586	1.79306	0.072964	-/0
GPR84	THAP9-AS1	-0.09207	0.593284	0.621059	0.074253	1.79252	0.073049	0/0
ATL2	THAP9-AS1	0.082111	0.634016	0.716667	0.029818	1.79121	0.07326	0/+
IRF6	THAP9-AS1	0.071815	0.677249	0.711303	0.031657	1.78993	0.073465	0/+
GIGYF2	THAP9-AS1	0.08276	0.631329	0.716667	0.029818	1.78978	0.07349	0/+
CYP3A4	THAP9-AS1	-0.45408	0.005405	0.316667	0.406397	1.78969	0.073503	-/0
CHST10	THAP9-AS1	0.148916	0.386047	-0.58333	0.099186	-1.78917	0.073587	0/0
KLRB1	THAP9-AS1	-0.08314	0.629754	-0.71667	0.029818	-1.78894	0.073625	0/-
CEBPZOS	THAP9-AS1	-0.07002	0.684907	0.633333	0.067086	1.78822	0.073741	0/0
GPALPP1	THAP9-AS1	0.192793	0.259936	0.766667	0.015944	1.78791	0.073791	0/+
OSBP2	THAP9-AS1	-0.13179	0.44357	0.594147	0.091583	1.78716	0.073912	0/0
MIR1208	THAP9-AS1	-0.19833	0.246229	0.547723	0.12687	1.78608	0.074087	0/0
NCOA6	THAP9-AS1	0.233977	0.169607	0.783333	0.01252	1.78483	0.074289	0/+
MIR3936	THAP9-AS1	0.042112	0.807337	0.694567	0.037864	1.78273	0.07463	0/+
RMI1	THAP9-AS1	0.320463	0.056713	0.816667	0.007225	1.78267	0.074639	0/+
PRDM12	THAP9-AS1	-0.01988	0.908374	0.660578	0.052773	1.78084	0.074939	0/0
H1-1	THAP9-AS1	-0.23614	0.165589	0.517549	0.153564	1.78071	0.07496	0/0
MEIS2	THAP9-AS1	-0.23707	0.163882	0.516667	0.15439	1.78023	0.075039	0/0
EPHX1	THAP9-AS1	-0.27851	0.100012	0.483333	0.18747	1.7801	0.075059	0/0
LIX1L-AS1	THAP9-AS1	0.110782	0.520083	0.72804	0.026154	1.77992	0.075089	0/+
MED18	THAP9-AS1	0.087264	0.612804	0.716667	0.029818	1.77985	0.075101	0/+
L3MBTL4	THAP9-AS1	-0.00824	0.961971	0.666667	0.049867	1.77916	0.075214	0/+
IGHV1-69	THAP9-AS1	0.115085	0.5039	-0.60252	0.085953	-1.77856	0.075311	0/0
ARL14EP	THAP9-AS1	0.467696	0.004024	0.866667	0.002495	1.77797	0.07541	#ERROR!
CXCL9	THAP9-AS1	0.054958	0.750216	0.7	0.03577	1.77769	0.075454	0/+
NCAN	THAP9-AS1	-0.02242	0.896723	0.658281	0.053897	1.7775	0.075486	0/0
GRB14	THAP9-AS1	-0.00746	0.965536	0.666667	0.049867	1.77747	0.075491	0/+
OXER1	THAP9-AS1	-0.16796	0.327481	0.566667	0.111633	1.77744	0.075496	0/0
LOC100505851	THAP9-AS1	-0.10951	0.524922	0.60553	0.083979	1.77659	0.075636	0/0
GRIK1	THAP9-AS1	0.258252	0.128321	0.791669	0.01101	1.7763	0.075683	0/+
PKIB	THAP9-AS1	-0.1758	0.305073	0.560674	0.116327	1.7759	0.07575	0/0
RFLNB	THAP9-AS1	0.334106	0.046423	-0.43333	0.243952	-1.77583	0.075761	#ERROR!
EEA1	THAP9-AS1	-0.1426	0.406734	0.583333	0.099186	1.77505	0.07589	0/0
LINC01968	THAP9-AS1	0.357929	0.032084	-0.41079	0.272071	-1.77503	0.075892	#ERROR!
HGD	THAP9-AS1	-0.46306	0.004455	0.3	0.432845	1.77427	0.076018	-/0
CRABP2	THAP9-AS1	0.356545	0.032803	-0.41178	0.270805	-1.77416	0.076036	#ERROR!
KRT8P5	THAP9-AS1	-0.39596	0.016824	0.372678	0.323259	1.77351	0.076144	-/0
OGT	THAP9-AS1	0.238867	0.160608	0.783333	0.01252	1.77349	0.076147	0/+
KRT18P61	THAP9-AS1	0.357104	0.032511	-0.41079	0.272071	-1.77297	0.076234	#ERROR!
KLHL8	THAP9-AS1	-0.03475	0.840545	0.65	0.058073	1.77282	0.076258	0/0
LMNB1	THAP9-AS1	0.090605	0.599217	0.716667	0.029818	1.77248	0.076315	0/+
LOC102723809	THAP9-AS1	-0.20775	0.224061	0.536292	0.136631	1.77214	0.076371	0/0
PPM1D	THAP9-AS1	-0.03437	0.842284	0.65	0.058073	1.77198	0.076398	0/0
LILRA5	THAP9-AS1	0.004763	0.978003	-0.66667	0.049867	-1.77156	0.076468	0/-
MMP24	THAP9-AS1	-0.17375	0.310862	0.560674	0.116327	1.77125	0.076519	0/0
CYS1	THAP9-AS1	-0.30193	0.073506	0.460255	0.212522	1.77111	0.076543	0/0
PUM2	THAP9-AS1	0.16242	0.34393	0.75	0.019942	1.77068	0.076613	0/+
FMO4	THAP9-AS1	-0.29425	0.081514	0.466667	0.205386	1.77052	0.076641	0/0
APOE	THAP9-AS1	-0.23269	0.172034	0.516667	0.15439	1.77009	0.076712	0/0
LINC01653	THAP9-AS1	0.073454	0.670294	0.707475	0.033013	1.76946	0.076817	0/+
LRRC38	THAP9-AS1	0.190525	0.265691	-0.54772	0.12687	-1.76832	0.077007	0/0
AK4	THAP9-AS1	-0.25302	0.136509	0.5	0.170471	1.7682	0.077028	0/0
C17orf100	THAP9-AS1	0.273119	0.107029	-0.48333	0.18747	-1.76734	0.077171	0/0
PCBP1	THAP9-AS1	-0.03218	0.852221	0.65	0.058073	1.76718	0.077197	0/0
FAT4	THAP9-AS1	0.059849	0.728791	0.7	0.03577	1.76695	0.077236	0/+
RAB11FIP1	THAP9-AS1	0.028057	0.870967	0.683333	0.042442	1.76673	0.077274	0/+
GNMT	THAP9-AS1	-0.11331	0.510527	0.6	0.087623	1.76601	0.077393	0/0
GCC1	THAP9-AS1	-0.05946	0.730492	0.633333	0.067086	1.76501	0.077562	0/0
ICAM5	THAP9-AS1	0.352509	0.034977	-0.41178	0.270805	-1.76406	0.077722	#ERROR!
NSG2	THAP9-AS1	0.004402	0.979671	0.669753	0.048434	1.7637	0.077783	0/+
FUOM	THAP9-AS1	-0.2713	0.10948	0.483333	0.18747	1.76304	0.077894	0/0
RMND1	THAP9-AS1	-0.000515	0.997622	0.666667	0.049867	1.76226	0.078026	0/+
PWAR5	THAP9-AS1	-0.13831	0.421127	0.582325	0.099914	1.76214	0.078046	0/0
FGGY	THAP9-AS1	-0.36396	0.029097	0.4	0.286105	1.76196	0.078077	-/0
FAHD2B	THAP9-AS1	-0.13656	0.427095	0.583333	0.099186	1.76157	0.078142	0/0
DRD2	THAP9-AS1	0.227727	0.181625	-0.51755	0.153564	-1.76126	0.078195	0/0
ARHGEF40	THAP9-AS1	-0.08494	0.622325	0.616667	0.076929	1.76121	0.078203	0/0
ASB7	THAP9-AS1	0.062548	0.717053	0.7	0.03577	1.76103	0.078234	0/+
F7	THAP9-AS1	-0.32782	0.050959	0.433333	0.243952	1.76038	0.078343	0/0
MIR3942	THAP9-AS1	0.195315	0.253632	0.762526	0.016882	1.76036	0.078347	0/+
ACBD3-AS1	THAP9-AS1	0.099246	0.564692	0.718185	0.029311	1.76024	0.078367	0/+
KDM4C	THAP9-AS1	0.474064	0.003491	0.866667	0.002495	1.76006	0.078398	#ERROR!
INAVA	THAP9-AS1	-0.08005	0.642573	0.619252	0.075347	1.75959	0.078478	0/0
CLK4	THAP9-AS1	0.286486	0.090271	0.8	0.009628	1.75929	0.078528	0/+
MAU2	THAP9-AS1	0.339511	0.042786	0.820091	0.006788	1.75858	0.078648	#ERROR!
GPR85	THAP9-AS1	0.269264	0.112274	-0.48333	0.18747	-1.75823	0.078708	0/0
EPB41L1	THAP9-AS1	0.063835	0.711478	0.7	0.03577	1.7582	0.078714	0/+
PHKA2	THAP9-AS1	-0.26924	0.112306	0.483333	0.18747	1.75818	0.078717	0/0
CNKSR2	THAP9-AS1	0.053351	0.757301	0.694567	0.037864	1.75808	0.078734	0/+
ATP6V0E2	THAP9-AS1	-0.10965	0.524372	0.6	0.087623	1.7579	0.078765	0/0
AKR1C4	THAP9-AS1	-0.3958	0.016871	0.366667	0.33174	1.75787	0.078769	-/0
AP3B2	THAP9-AS1	-0.14507	0.398559	0.576354	0.10429	1.75757	0.078822	0/0
PRKRIP1	THAP9-AS1	0.376577	0.023588	0.833333	0.005266	1.75711	0.078899	#ERROR!
PPM1K-DT	THAP9-AS1	0.18558	0.278528	-0.54772	0.12687	-1.7571	0.0789	0/0
NAALADL1	THAP9-AS1	0.286248	0.090552	-0.46862	0.203236	-1.75688	0.078937	0/0
CEP85	THAP9-AS1	0.064869	0.70701	0.7	0.03577	1.75592	0.079101	0/+
KLHL4	THAP9-AS1	0.022272	0.89741	-0.65273	0.056677	-1.75586	0.079113	0/0
DDX39B	THAP9-AS1	0.377091	0.023383	0.833333	0.005266	1.7558	0.079123	#ERROR!
MIR4258	THAP9-AS1	0.145928	0.395754	-0.57511	0.105217	-1.7554	0.079191	0/0
C17orf102	THAP9-AS1	-0.0314	0.855735	0.647261	0.059498	1.75514	0.079235	0/0
NSMCE4A	THAP9-AS1	0.08765	0.611227	0.711303	0.031657	1.75505	0.079251	0/+
KMO	THAP9-AS1	-0.22606	0.184929	0.516667	0.15439	1.75478	0.079298	0/0
LINC01605	THAP9-AS1	0.331009	0.048616	-0.42829	0.250102	-1.75466	0.079318	#ERROR!
RNA5SP440	THAP9-AS1	-0.1845	0.281388	0.547723	0.12687	1.75465	0.079319	0/0
GDAP2	THAP9-AS1	-0.05457	0.751931	0.633333	0.067086	1.75427	0.079384	0/0
C10orf82	THAP9-AS1	0.36487	0.028669	-0.39606	0.291321	-1.75399	0.079432	#ERROR!
BSCL2	THAP9-AS1	-0.02587	0.880947	0.65	0.058073	1.75337	0.079538	0/0
GS1-124K5.4	THAP9-AS1	-0.13287	0.439807	0.583333	0.099186	1.75334	0.079543	0/0
CCNT2	THAP9-AS1	0.003604	0.983358	0.666667	0.049867	1.75324	0.07956	0/+
C1QTNF6	THAP9-AS1	0.066152	0.70148	0.7	0.03577	1.7531	0.079584	0/+
LOC105374344	THAP9-AS1	0.183073	0.285189	-0.54772	0.12687	-1.75142	0.079874	0/0
CCPG1	THAP9-AS1	-0.24583	0.148394	0.5	0.170471	1.75141	0.079875	0/0
OVOL3	THAP9-AS1	-0.15433	0.368821	0.567734	0.110809	1.75024	0.080077	0/0
CLK3	THAP9-AS1	0.379432	0.022469	0.833333	0.005266	1.74982	0.080149	#ERROR!
ACP3	THAP9-AS1	0.307871	0.067747	-0.44729	0.22736	-1.74972	0.080167	0/0
NAA20	THAP9-AS1	0.101165	0.557152	0.716667	0.029818	1.74915	0.080265	0/+
ELAVL4	THAP9-AS1	0.117906	0.49343	0.724801	0.027165	1.74912	0.080271	0/+
CNKSR1	THAP9-AS1	0.249678	0.141948	0.783333	0.01252	1.74833	0.080407	0/+
NAA25	THAP9-AS1	0.068344	0.692063	0.7	0.03577	1.74829	0.080415	0/+
EXTL2	THAP9-AS1	0.101693	0.555086	0.716667	0.029818	1.74798	0.080467	0/+
KISS1	THAP9-AS1	0.165218	0.335566	-0.5594	0.117338	-1.74798	0.080468	0/0
HCG27	THAP9-AS1	0.250113	0.141233	0.783333	0.01252	1.74732	0.080582	0/+
ALCAM	THAP9-AS1	-0.15444	0.368466	0.566667	0.111633	1.74705	0.080629	0/0
RNU1-61P	THAP9-AS1	0.21176	0.215036	-0.5249	0.146784	-1.74663	0.080701	0/0
LOC153684	THAP9-AS1	-0.20054	0.2409	0.533333	0.139227	1.74662	0.080704	0/0
C19orf73	THAP9-AS1	-0.19741	0.248479	0.53557	0.137262	1.74633	0.080753	0/0
MITD1	THAP9-AS1	0.250869	0.139995	0.783333	0.01252	1.74555	0.080889	0/+
PRKCB	THAP9-AS1	0.050454	0.770115	-0.63333	0.067086	-1.74524	0.080943	0/0
MREG	THAP9-AS1	-0.02214	0.898026	0.65	0.058073	1.7452	0.08095	0/0
FBXL4	THAP9-AS1	-0.02214	0.898033	0.65	0.058073	1.7452	0.08095	0/0
MTM1	THAP9-AS1	0.173745	0.310862	0.75	0.019942	1.74518	0.080954	0/+
AARS2	THAP9-AS1	0.069889	0.685456	0.7	0.03577	1.74489	0.081004	0/+
ABCD2	THAP9-AS1	0.00245	0.988684	-0.66109	0.052523	-1.74468	0.08104	0/0
RFESD	THAP9-AS1	0.162813	0.342745	0.744776	0.02132	1.7439	0.081177	0/+
GGN	THAP9-AS1	0.147714	0.389934	-0.57034	0.108812	-1.74387	0.081182	0/0
CCDC85B	THAP9-AS1	0.221121	0.19497	-0.51667	0.15439	-1.7434	0.081264	0/0
GNG8	THAP9-AS1	0.329345	0.049827	-0.4256	0.25342	-1.74336	0.08127	#ERROR!
CMPK2	THAP9-AS1	-0.15252	0.374523	0.566667	0.111633	1.74274	0.081378	0/0
PAXBP1-AS1	THAP9-AS1	-0.20403	0.232644	0.52943	0.142696	1.74268	0.08139	0/0
FGD5-AS1	THAP9-AS1	0.008494	0.960786	0.666667	0.049867	1.74254	0.081414	0/+
MPC1L	THAP9-AS1	0.179068	0.296038	-0.54772	0.12687	-1.74236	0.081446	0/0
KDM1A	THAP9-AS1	0.533239	0.000812	0.883333	0.001591	1.74222	0.08147	#ERROR!
LOC100130748	THAP9-AS1	-0.17898	0.296274	0.547723	0.12687	1.74216	0.08148	0/0
MYOT	THAP9-AS1	-0.16933	0.323494	0.554641	0.12117	1.74214	0.081484	0/0
ICOS	THAP9-AS1	0.035151	0.838724	-0.6414	0.06262	-1.74143	0.081608	0/0
PWAR1	THAP9-AS1	-0.17593	0.304716	0.549604	0.125305	1.74117	0.081655	0/0
C11orf52	THAP9-AS1	-0.25439	0.134331	0.489491	0.181083	1.74094	0.081694	0/0
RN7SL812P	THAP9-AS1	0.068616	0.690897	-0.62106	0.074253	-1.74085	0.08171	0/0
LINC01239	THAP9-AS1	0.175982	0.304578	0.75	0.019942	1.74013	0.081837	0/+
HSCB	THAP9-AS1	-0.17491	0.307566	0.55	0.124977	1.74011	0.08184	0/0
CHP2	THAP9-AS1	-0.34363	0.040171	0.410792	0.272071	1.73936	0.081972	-/0
LOC100422024	THAP9-AS1	-0.07256	0.674082	-0.7	0.03577	-1.73901	0.082033	0/-
KLF3	THAP9-AS1	0.073359	0.670695	0.7	0.03577	1.73725	0.082342	0/+
CCT5P2	THAP9-AS1	0.176305	0.303677	-0.54772	0.12687	-1.73611	0.082544	0/0
ANGPTL7	THAP9-AS1	-0.16987	0.32195	0.552306	0.123077	1.73597	0.082568	0/0
PRAMEF10	THAP9-AS1	-0.36909	0.026744	0.384941	0.306299	1.73595	0.082573	-/0
IL27RA	THAP9-AS1	0.259717	0.126093	-0.48333	0.18747	-1.73577	0.082605	0/0
FXYD2	THAP9-AS1	-0.21776	0.202016	0.516667	0.15439	1.73567	0.082622	0/0
DCT	THAP9-AS1	0.107267	0.533489	0.716667	0.029818	1.73565	0.082625	0/+
ACMSD	THAP9-AS1	-0.31763	0.05906	0.433333	0.243952	1.73549	0.082653	0/0
HLA-DRB6	THAP9-AS1	0.017503	0.919296	-0.65	0.058073	-1.73505	0.082731	0/0
PIP4P1	THAP9-AS1	0.340048	0.042438	0.816667	0.007225	1.73456	0.082818	#ERROR!
OR6L2P	THAP9-AS1	0.175511	0.305894	-0.54772	0.12687	-1.73432	0.082861	0/0
OIP5-AS1	THAP9-AS1	0.108108	0.530266	0.716667	0.029818	1.73379	0.082956	0/+
LOC107985579	THAP9-AS1	-0.04072	0.813572	0.635989	0.065595	1.73364	0.082983	0/0
HYAL2	THAP9-AS1	0.31686	0.059713	-0.43333	0.243952	-1.73361	0.082987	0/0
LOC105373159	THAP9-AS1	0.111347	0.517943	0.718185	0.029311	1.73346	0.083014	0/+
LAMA5-AS1	THAP9-AS1	-0.09841	0.567995	0.6	0.087623	1.73302	0.083091	0/0
CLEC9A	THAP9-AS1	-0.0395	0.819063	-0.68101	0.043434	-1.73212	0.083253	0/-
MIR5091	THAP9-AS1	0.174384	0.309059	-0.54772	0.12687	-1.73178	0.083313	0/0
IGKV2-4	THAP9-AS1	0.174303	0.309288	-0.54772	0.12687	-1.73159	0.083346	0/0
DENND5B	THAP9-AS1	-0.12278	0.475606	0.583333	0.099186	1.7309	0.083471	0/0
IFITM10	THAP9-AS1	0.04453	0.7965	0.683333	0.042442	1.73063	0.083518	0/+
FAM162A	THAP9-AS1	0.144144	0.401618	0.733333	0.024554	1.73055	0.083532	0/+
IL21R	THAP9-AS1	0.175497	0.305932	-0.54624	0.128114	-1.72965	0.083692	0/0
MPP5	THAP9-AS1	0.004633	0.978605	0.661094	0.052523	1.72918	0.083776	0/0
CREB1	THAP9-AS1	0.299099	0.076382	0.8	0.009628	1.7291	0.083791	0/+
CA6	THAP9-AS1	-0.20816	0.223106	0.521749	0.149669	1.7289	0.083827	0/0
CRIP1	THAP9-AS1	0.391248	0.018296	-0.35984	0.341509	-1.72885	0.083835	#ERROR!
IRS4	THAP9-AS1	0.172788	0.313577	-0.54772	0.12687	-1.72818	0.083957	0/0
HNRNPA3P10	THAP9-AS1	0.402849	0.01485	-0.34744	0.359591	-1.72799	0.083991	#ERROR!
CDK5	THAP9-AS1	-0.06976	0.686006	0.616667	0.076929	1.72778	0.084027	0/0
FNIP1	THAP9-AS1	-0.12124	0.481217	0.583333	0.099186	1.72746	0.084084	0/0
RN7SL320P	THAP9-AS1	0.210286	0.218319	-0.51962	0.151641	-1.72735	0.084105	0/0
MYSM1	THAP9-AS1	-0.0139	0.935873	0.65	0.058073	1.72717	0.084138	0/0
MIR4688	THAP9-AS1	-0.33853	0.043427	0.410792	0.272071	1.72672	0.084218	-/0
PTGER4	THAP9-AS1	0.213642	0.210891	-0.51667	0.15439	-1.72622	0.084308	0/0
GPATCH2	THAP9-AS1	0.300644	0.074802	0.8	0.009628	1.72538	0.084458	0/+
ARHGAP27P1-BPTFP1-KPNA2P3	THAP9-AS1	0.101435	0.556093	0.711303	0.031657	1.72461	0.084598	0/+
LGALS8-AS1	THAP9-AS1	0.08349	0.628311	-0.60704	0.083002	-1.72432	0.084649	0/0
KRT18P68	THAP9-AS1	0.286688	0.090035	-0.45644	0.216838	-1.724	0.084708	0/0
LINC01413	THAP9-AS1	0.333891	0.046572	-0.41404	0.26792	-1.72384	0.084737	#ERROR!
MRPS17P5	THAP9-AS1	0.170848	0.319122	-0.54772	0.12687	-1.7238	0.084743	0/0
IGLJ7	THAP9-AS1	0.170848	0.319122	-0.54772	0.12687	-1.7238	0.084743	0/0
MOGAT2	THAP9-AS1	-0.23368	0.170172	0.5	0.170471	1.72319	0.084855	0/0
IGSF3	THAP9-AS1	-0.01197	0.944761	0.65	0.058073	1.72294	0.084899	0/0
KCNC1	THAP9-AS1	0.094346	0.58416	0.707177	0.03312	1.7221	0.08505	0/+
FAM83F	THAP9-AS1	0.148005	0.388991	0.733333	0.024554	1.72192	0.085085	0/+
INTS4	THAP9-AS1	0.302246	0.07319	0.8	0.009628	1.72153	0.085155	0/+
LINC01780	THAP9-AS1	0.018126	0.916433	0.666667	0.049867	1.72146	0.085168	0/+
LOC101928371	THAP9-AS1	0.285506	0.091427	-0.45644	0.216838	-1.72118	0.085217	0/0
LINC01801	THAP9-AS1	0.343782	0.040078	-0.40369	0.281269	-1.72109	0.085235	#ERROR!
CYP27A1	THAP9-AS1	-0.29268	0.083223	0.45	0.224216	1.7206	0.085324	0/0
CILP2	THAP9-AS1	0.273266	0.106833	-0.46667	0.205386	-1.72058	0.085327	0/0
KRIT1	THAP9-AS1	0.081081	0.638289	0.7	0.03577	1.72025	0.085386	0/+
NPDC1	THAP9-AS1	0.347233	0.037993	-0.4	0.286105	-1.72004	0.085425	#ERROR!
GTF2B	THAP9-AS1	-0.03874	0.822502	0.633333	0.067086	1.71956	0.085513	0/0
CCDC179	THAP9-AS1	-0.13104	0.446187	-0.72457	0.027239	-1.71885	0.085642	0/-
IDO2	THAP9-AS1	-0.09165	0.594974	0.6	0.087623	1.71811	0.085777	0/0
KRT8P33	THAP9-AS1	0.035689	0.836289	0.675436	0.045865	1.71791	0.085814	0/+
DUSP9	THAP9-AS1	-0.00966	0.955426	0.65	0.058073	1.71788	0.085819	0/0
C11orf95	THAP9-AS1	0.223567	0.189952	0.766667	0.015944	1.7175	0.085887	0/+
ANP32E	THAP9-AS1	0.223681	0.18972	0.766667	0.015944	1.71724	0.085935	0/+
FBXO27	THAP9-AS1	-0.09113	0.597111	0.6	0.087623	1.71694	0.08599	0/0
RFX4	THAP9-AS1	0.346919	0.038179	0.816548	0.00724	1.71673	0.086028	#ERROR!
MARK4	THAP9-AS1	0.150322	0.381526	0.733333	0.024554	1.71673	0.086028	0/+
ARL8B	THAP9-AS1	0.115966	0.500617	0.716667	0.029818	1.71637	0.086094	0/+
RAD23B	THAP9-AS1	0.26332	0.120736	0.783333	0.01252	1.71637	0.086094	0/+
FIGNL1	THAP9-AS1	-0.16436	0.338115	0.55	0.124977	1.71633	0.086102	0/0
CDO1	THAP9-AS1	-0.0372	0.82944	0.633333	0.067086	1.71619	0.086127	0/0
RGL2	THAP9-AS1	0.395624	0.016925	-0.35	0.35582	-1.71556	0.086243	#ERROR!
ITM2B	THAP9-AS1	0.05148	0.765568	0.683333	0.042442	1.71538	0.086275	0/+
FLOT2	THAP9-AS1	0.271042	0.109831	-0.46667	0.205386	-1.71533	0.086286	0/0
RNU1-7P	THAP9-AS1	0.056949	0.741471	-0.62106	0.074253	-1.71521	0.086306	0/0
CUL4B	THAP9-AS1	0.083398	0.628691	0.7	0.03577	1.71515	0.086318	0/+
FMNL1	THAP9-AS1	0.395367	0.017003	-0.35	0.35582	-1.71489	0.086366	#ERROR!
ADAMTS7P4	THAP9-AS1	0.210944	0.216849	-0.51481	0.156137	-1.7145	0.086437	0/0
PLEKHA1	THAP9-AS1	-0.11532	0.50304	0.583333	0.099186	1.71432	0.086469	0/0
CACNB2	THAP9-AS1	0.264418	0.119138	0.783333	0.01252	1.71379	0.086567	0/+
DEPTOR	THAP9-AS1	-0.03552	0.837048	0.633333	0.067086	1.7125	0.086804	0/0
RNF126P1	THAP9-AS1	-0.0619	0.719873	-0.6881	0.040457	-1.71221	0.086858	0/-
RNPC3	THAP9-AS1	0.053024	0.758741	0.683333	0.042442	1.71199	0.086898	0/+
COG2	THAP9-AS1	0.265268	0.117912	0.783333	0.01252	1.71179	0.086936	0/+
LTB4R2	THAP9-AS1	-0.11391	0.508277	0.583333	0.099186	1.71122	0.087041	0/0
C3P1	THAP9-AS1	-0.40968	0.013089	0.333333	0.380713	1.71098	0.087085	-/0
MROH3P	THAP9-AS1	-0.25551	0.132576	0.478091	0.193006	1.71097	0.087086	0/0
CYP3A43	THAP9-AS1	-0.20679	0.226253	0.516667	0.15439	1.71052	0.087169	0/0
GATAD2B	THAP9-AS1	0.315315	0.061037	0.803354	0.009106	1.71046	0.087182	0/+
ATG12	THAP9-AS1	0.153153	0.372518	0.733333	0.024554	1.71039	0.087194	0/+
PTPRK	THAP9-AS1	-0.11351	0.50978	0.583333	0.099186	1.71033	0.087205	0/0
FBXL19	THAP9-AS1	0.189189	0.26912	0.75	0.019942	1.71023	0.087224	0/+
FGFR3P6	THAP9-AS1	-0.33183	0.048026	0.410792	0.272071	1.7102	0.087229	-/0
AP2B1P1	THAP9-AS1	0.19958	0.243207	-0.52175	0.149669	-1.7093	0.087395	0/0
LOC100505622	THAP9-AS1	0.068585	0.691033	-0.61206	0.079799	-1.70901	0.08745	0/0
CCDC122	THAP9-AS1	0.227314	0.18244	0.766667	0.015944	1.70886	0.087476	0/+
LOC105379252	THAP9-AS1	-0.16401	0.33916	0.547723	0.12687	1.70841	0.087561	0/0
ATPAF1	THAP9-AS1	-0.26744	0.114823	0.466667	0.205386	1.70682	0.087855	0/0
ACOXL-AS1	THAP9-AS1	0.145561	0.396957	0.728918	0.025884	1.70662	0.087892	0/+
BARHL1	THAP9-AS1	0.203906	0.232931	-0.51755	0.153564	-1.70658	0.087901	0/0
LINC01030	THAP9-AS1	0.16272	0.343027	-0.54772	0.12687	-1.7055	0.088101	0/0
DPRXP6	THAP9-AS1	0.137103	0.42524	0.724569	0.027239	1.70534	0.088131	0/+
ATP6V1D	THAP9-AS1	-0.1112	0.518511	0.583333	0.099186	1.70519	0.088158	0/0
FBXL20	THAP9-AS1	0.351866	0.035334	0.816667	0.007225	1.70518	0.08816	#ERROR!
ADGB	THAP9-AS1	0.149379	0.384553	0.730297	0.025464	1.70453	0.088282	0/+
GBF1	THAP9-AS1	0.056628	0.742881	0.683333	0.042442	1.70408	0.088366	0/+
CLIC4	THAP9-AS1	0.155985	0.363638	0.733333	0.024554	1.70404	0.088373	0/+
NUDCD1	THAP9-AS1	0.397245	0.01644	0.833333	0.005266	1.70391	0.088398	#ERROR!
ALKBH4	THAP9-AS1	0.156252	0.362805	0.733333	0.024554	1.70344	0.088486	0/+
MSH2	THAP9-AS1	0.057147	0.740607	0.683333	0.042442	1.70294	0.088578	0/+
ACTR3C	THAP9-AS1	-0.4053	0.014196	0.334731	0.378595	1.70293	0.088581	-/0
RICTOR	THAP9-AS1	0.156499	0.362037	0.733333	0.024554	1.70289	0.088589	0/+
FTL	THAP9-AS1	-0.2852	0.091791	0.45	0.224216	1.70273	0.088619	0/0
[truncated: 15,920 more rows]

## Sheet: COAD
Gene1	Gene2	TCGA_COAD.PrimarySolidTumor_cor	TCGA_COAD.PrimarySolidTumor_pVal	TCGA_COAD.SolidTissueNormal_cor	TCGA_COAD.SolidTissueNormal_pVal	zScoreDiff	pValDiff	Classes
[truncated: 24,775 more rows]

[truncated: 15 more sheets: ESCA, GBM, HNSC, KICH, KIRC, KIRP, LIHC, LUAD, LUSC, PAAD, PRAD, READ, STAD, THCA, UCEC]
