# Supplementary material for: Pan-Cancer Analysis Reveals the Prognostic Potential of the THAP9/THAP9-AS1 Sense–Antisense Gene Pair in Human Cancers
Source: Noncoding RNA. 2022 Jul 8;8(4):51. doi: 10.3390/ncrna8040051 (PMC9326536; doi:10.3390/ncrna8040051)
Supplement: Supplementary file 1 [file ncrna-08-00051-s001.zip › Supplementary Table S11_2.xlsx]

## Sheet: READ
Gene1	Gene2	TCGA_READ.PrimarySolidTumor_cor	TCGA_READ.PrimarySolidTumor_pVal	TCGA_READ.SolidTissueNormal_cor	TCGA_READ.SolidTissueNormal_pVal	zScoreDiff	pValDiff	Classes
RPL7P4	THAP9-AS1	0.503414	4.75e-12	-0.85534	0.001603	-4.60379	4.15e-06	#ERROR!
ITGB1BP1	THAP9-AS1	0.694608	0	-0.68485	0.028883	-4.26514	2e-05	#ERROR!
JPX	THAP9-AS1	0.769132	0	-0.57576	0.081553	-4.21305	2.52e-05	#ERROR!
CNBD2	THAP9-AS1	0.523617	4.53e-13	-0.78409	0.00726	-4.11971	3.79e-05	#ERROR!
RPL21P98	THAP9-AS1	0.597037	0	-0.73161	0.016177	-4.07822	4.54e-05	#ERROR!
RNU6-553P	THAP9-AS1	0.426653	9.93e-09	-0.80904	0.004588	-3.97589	7.01e-05	#ERROR!
ITGB3BP	THAP9-AS1	0.770015	0	-0.49091	0.149656	-3.91947	8.87e-05	#ERROR!
CDC37L1-DT	THAP9-AS1	0.635858	0	-0.66465	0.036028	-3.90603	9.38e-05	#ERROR!
RAB33B	THAP9-AS1	0.807015	0	-0.40606	0.244282	-3.89852	9.68e-05	#ERROR!
NEURL1	THAP9-AS1	0.027174	0.728191	0.915152	0.000204	3.85289	0.000117	0/+
PDILT	THAP9-AS1	0.045508	0.560434	-0.89962	0.000393	-3.81411	0.000137	0/-
IGHD3-22	THAP9-AS1	-0.17703	0.022511	0.87052	0.001049	3.81004	0.000139	-/+
LINC00867	THAP9-AS1	0.368778	1.01e-06	-0.80904	0.004588	-3.80279	0.000143	#ERROR!
MYOM2	THAP9-AS1	0.370416	9e-07	-0.80606	0.004862	-3.78601	0.000153	#ERROR!
RPL23AP47	THAP9-AS1	0.350939	3.56e-06	-0.81144	0.004375	-3.76883	0.000164	#ERROR!
DNAAF4	THAP9-AS1	0.565443	2.22e-15	-0.68103	0.030151	-3.70361	0.000213	#ERROR!
C1orf141	THAP9-AS1	0.252167	0.001047	-0.83689	0.002531	-3.695	0.00022	#ERROR!
CEP44	THAP9-AS1	0.854727	0	-0.18788	0.603218	-3.68283	0.000231	#ERROR!
LINC02115	THAP9-AS1	0.354702	2.75e-06	-0.79772	0.005692	-3.68171	0.000232	#ERROR!
EIF1AX	THAP9-AS1	0.685021	0	-0.55152	0.098401	-3.67148	0.000241	#ERROR!
PIN1P1	THAP9-AS1	-0.18862	0.014943	0.852803	0.001713	3.6669	0.000246	-/+
DCUN1D4	THAP9-AS1	0.829507	0	-0.26061	0.467089	-3.657	0.000255	#ERROR!
RPL7AP66	THAP9-AS1	0.696811	0	-0.5228	0.121027	-3.62666	0.000287	#ERROR!
LINC02044	THAP9-AS1	0.460378	4.36e-10	-0.73637	0.015153	-3.62426	0.00029	#ERROR!
ECHDC1	THAP9-AS1	0.728284	0	-0.46667	0.173939	-3.60051	0.000318	#ERROR!
CLK1	THAP9-AS1	0.857959	0	-0.13939	0.700932	-3.58793	0.000333	#ERROR!
RPL35P6	THAP9-AS1	0.244363	0.00151	-0.82572	0.003252	-3.58311	0.00034	#ERROR!
RPL21P53	THAP9-AS1	0.686079	0	-0.5244	0.119688	-3.58047	0.000343	#ERROR!
RHEB	THAP9-AS1	0.707725	0	-0.49091	0.149656	-3.57284	0.000353	#ERROR!
PAQR3	THAP9-AS1	0.749998	0	-0.41818	0.229113	-3.56924	0.000358	#ERROR!
C1orf52	THAP9-AS1	0.842946	0	-0.17576	0.627188	-3.54515	0.000392	#ERROR!
OSGEPL1	THAP9-AS1	0.751993	0	-0.40606	0.244282	-3.54401	0.000394	#ERROR!
MOB4	THAP9-AS1	0.709861	0	-0.47879	0.161523	-3.54377	0.000394	#ERROR!
LSM6	THAP9-AS1	0.789578	0	-0.32121	0.365468	-3.53117	0.000414	#ERROR!
ELOC	THAP9-AS1	0.728678	0	-0.44242	0.200423	-3.52572	0.000422	#ERROR!
ANAPC10	THAP9-AS1	0.816796	0	-0.24848	0.488776	-3.52514	0.000423	#ERROR!
PTBP2	THAP9-AS1	0.824433	0	-0.22424	0.533401	-3.51937	0.000433	#ERROR!
RPL7P6	THAP9-AS1	0.706184	0	-0.46952	0.170966	-3.49513	0.000474	#ERROR!
CHURC1-FNTB	THAP9-AS1	0.39569	1.32e-07	-0.74796	0.012856	-3.48971	0.000484	#ERROR!
C7orf25	THAP9-AS1	0.719623	0	-0.44513	0.197357	-3.48629	0.00049	#ERROR!
EIF4E	THAP9-AS1	0.815872	0	-0.23636	0.510885	-3.48576	0.000491	#ERROR!
ACRP1	THAP9-AS1	0.379843	4.48e-07	0.94514	3.71e-05	3.48327	0.000495	#ERROR!
ARL14EP	THAP9-AS1	0.753148	0	-0.38182	0.276255	-3.4785	0.000504	#ERROR!
B3GAT2	THAP9-AS1	0.746096	0	-0.39394	0.259998	-3.47389	0.000513	#ERROR!
RPL7P1	THAP9-AS1	0.746725	0	-0.38182	0.276255	-3.44156	0.000578	#ERROR!
FEZF2	THAP9-AS1	-0.65552	0	0.522233	0.121503	3.43305	0.000597	-/0
ITGB1BP2	THAP9-AS1	0.558689	5.33e-15	-0.62424	0.053718	-3.42937	0.000605	#ERROR!
C21orf91	THAP9-AS1	0.709709	0	-0.44242	0.200423	-3.42682	0.000611	#ERROR!
RNU6-8	THAP9-AS1	0.580589	2.22e-16	-0.60183	0.065646	-3.42057	0.000625	#ERROR!
PYURF	THAP9-AS1	0.747527	0	-0.3697	0.29305	-3.41061	0.000648	#ERROR!
CLMAT3	THAP9-AS1	-0.55649	7.11e-15	0.620863	0.055416	3.40746	0.000656	-/0
NACA3P	THAP9-AS1	0.537677	8.04e-14	-0.63636	0.047912	-3.40438	0.000663	#ERROR!
ARL6	THAP9-AS1	0.726077	0	-0.40606	0.244282	-3.40021	0.000673	#ERROR!
BLZF1	THAP9-AS1	0.756753	0	-0.34545	0.328227	-3.39412	0.000688	#ERROR!
RPL21P2	THAP9-AS1	0.420291	1.73e-08	-0.71393	0.020392	-3.37992	0.000725	#ERROR!
ATP6V1G1	THAP9-AS1	0.796112	0	-0.24848	0.488776	-3.37615	0.000735	#ERROR!
NMD3	THAP9-AS1	0.775773	0	-0.29697	0.404702	-3.37403	0.000741	#ERROR!
MRPS10	THAP9-AS1	0.720782	0	-0.40606	0.244282	-3.37226	0.000746	#ERROR!
ANKRD46	THAP9-AS1	0.764278	0	-0.32121	0.365468	-3.37041	0.000751	#ERROR!
LINC01397	THAP9-AS1	0.403136	7.24e-08	-0.72175	0.018443	-3.36853	0.000756	#ERROR!
GTF2H5	THAP9-AS1	0.712426	0	-0.41818	0.229113	-3.36577	0.000763	#ERROR!
EIF5A2	THAP9-AS1	0.700318	0	-0.4303	0.214492	-3.34216	0.000831	#ERROR!
MRPL50	THAP9-AS1	0.800451	0	-0.22424	0.533401	-3.34163	0.000833	#ERROR!
C2orf76	THAP9-AS1	0.752583	0	-0.33333	0.346594	-3.33527	0.000852	#ERROR!
MYL6	THAP9-AS1	0.57156	8.88e-16	-0.58788	0.073878	-3.33225	0.000861	#ERROR!
CLDND1	THAP9-AS1	0.76256	0	-0.30909	0.384841	-3.32618	0.00088	#ERROR!
RPS10-NUDT3	THAP9-AS1	0.502197	5.44e-12	-0.64651	0.043387	-3.32535	0.000883	#ERROR!
ASNSD1	THAP9-AS1	0.750596	0	-0.33333	0.346594	-3.32379	0.000888	#ERROR!
BMI1	THAP9-AS1	0.754699	0	-0.32121	0.365468	-3.31344	0.000922	#ERROR!
KLHL23	THAP9-AS1	0.765833	0	-0.29697	0.404702	-3.31239	0.000925	#ERROR!
NEK7	THAP9-AS1	0.708313	0	-0.40606	0.244282	-3.30814	0.000939	#ERROR!
MINDY3	THAP9-AS1	0.741531	0	-0.34545	0.328227	-3.30681	0.000944	#ERROR!
POT1-AS1	THAP9-AS1	0.500714	6.43e-12	-0.64026	0.04614	-3.29352	0.000989	#ERROR!
LOC729532	THAP9-AS1	-0.40581	5.82e-08	0.703526	0.023198	3.28336	0.001026	-/+
LRRC49	THAP9-AS1	0.671124	0	-0.45455	0.186905	-3.27927	0.001041	#ERROR!
RGS17	THAP9-AS1	0.729987	0	-0.35758	0.310376	-3.27827	0.001044	#ERROR!
C2orf91	THAP9-AS1	0.311776	4.33e-05	-0.75255	0.012017	-3.27453	0.001058	#ERROR!
OSBPL8	THAP9-AS1	0.728569	0	-0.35758	0.310376	-3.27064	0.001073	#ERROR!
PCGF6	THAP9-AS1	0.747088	0	-0.32121	0.365468	-3.26953	0.001077	#ERROR!
MRPS18C	THAP9-AS1	0.795873	0	-0.20669	0.566695	-3.26357	0.0011	#ERROR!
LINC02227	THAP9-AS1	0.135177	0.082485	-0.82113	0.003587	-3.26185	0.001107	0/-
RAP1A	THAP9-AS1	0.756844	0	-0.29697	0.404702	-3.25858	0.00112	#ERROR!
PACRGL	THAP9-AS1	0.783194	0	-0.23636	0.510885	-3.25737	0.001125	#ERROR!
NKIRAS1	THAP9-AS1	0.772871	0	-0.26061	0.467089	-3.25656	0.001128	#ERROR!
COPS2	THAP9-AS1	0.718738	0	-0.3697	0.29305	-3.25386	0.001138	#ERROR!
NPIPB13	THAP9-AS1	-0.37101	8.62e-07	0.717845	0.019399	3.25303	0.001142	-/+
MIER1	THAP9-AS1	0.7771	0	-0.24848	0.488776	-3.25059	0.001152	#ERROR!
MTERF2	THAP9-AS1	0.829618	0	-0.10303	0.776998	-3.24682	0.001167	#ERROR!
LINC00639	THAP9-AS1	0.416304	2.43e-08	-0.68904	0.027533	-3.24437	0.001177	#ERROR!
RPL7P37	THAP9-AS1	0.477147	8.07e-11	-0.64651	0.043387	-3.24242	0.001185	#ERROR!
CTNNAL1	THAP9-AS1	0.67129	0	-0.44242	0.200423	-3.24184	0.001188	#ERROR!
LINC02516	THAP9-AS1	0.459728	4.64e-10	-0.65795	0.038638	-3.23638	0.001211	#ERROR!
RPL21P40	THAP9-AS1	0.352865	3.12e-06	-0.72341	0.018048	-3.22962	0.00124	#ERROR!
GLMN	THAP9-AS1	0.773361	0	-0.24924	0.48741	-3.22904	0.001242	#ERROR!
DPH3	THAP9-AS1	0.72057	0	-0.35758	0.310376	-3.22827	0.001245	#ERROR!
PTS	THAP9-AS1	0.726864	0	-0.34545	0.328227	-3.22672	0.001252	#ERROR!
DNAJB14	THAP9-AS1	0.810782	0	-0.15152	0.676065	-3.22592	0.001256	#ERROR!
HCG20	THAP9-AS1	0.425889	1.06e-08	-0.67893	0.030867	-3.22588	0.001256	#ERROR!
C11orf98	THAP9-AS1	0.783301	0	-0.22424	0.533401	-3.22585	0.001256	#ERROR!
MSANTD4	THAP9-AS1	0.66645	0	-0.44242	0.200423	-3.2198	0.001283	#ERROR!
RPL13P2	THAP9-AS1	-0.62756	0	0.492366	0.148266	3.21223	0.001317	-/0
RAP1B	THAP9-AS1	0.716782	0	-0.35758	0.310376	-3.20855	0.001334	#ERROR!
NDUFAF2	THAP9-AS1	0.719078	0	-0.35259	0.317662	-3.20611	0.001345	#ERROR!
ISCA1	THAP9-AS1	0.785038	0	-0.21212	0.556306	-3.20518	0.00135	#ERROR!
KRT8P36	THAP9-AS1	-0.44396	2.08e-09	0.660606	0.037588	3.19833	0.001382	-/+
LAMC1-AS1	THAP9-AS1	0.655315	0	-0.45069	0.19114	-3.19605	0.001393	#ERROR!
LINC01993	THAP9-AS1	0.325726	1.85e-05	0.922817	0.000141	3.19483	0.001399	#ERROR!
LOC100996404	THAP9-AS1	0.347529	4.48e-06	-0.71915	0.019077	-3.19196	0.001413	#ERROR!
NDUFV2	THAP9-AS1	0.745123	0	-0.29697	0.404702	-3.19093	0.001418	#ERROR!
BMT2	THAP9-AS1	0.719868	0	-0.34545	0.328227	-3.1898	0.001424	#ERROR!
ATL2	THAP9-AS1	0.782616	0	-0.21212	0.556306	-3.18938	0.001426	#ERROR!
JMY	THAP9-AS1	0.782574	0	-0.21212	0.556306	-3.1891	0.001427	#ERROR!
MDM1	THAP9-AS1	0.787277	0	-0.2	0.579584	-3.18808	0.001432	#ERROR!
ELF2	THAP9-AS1	0.837316	0	-0.05455	0.881036	-3.18748	0.001435	#ERROR!
RAB41	THAP9-AS1	0.687667	0	-0.3988	0.253627	-3.18501	0.001448	#ERROR!
MTHFD2L	THAP9-AS1	0.796023	0	-0.17576	0.627188	-3.18381	0.001454	#ERROR!
CCDC121	THAP9-AS1	0.731231	0	-0.32121	0.365468	-3.18154	0.001465	#ERROR!
DSTN	THAP9-AS1	0.639847	0	-0.46667	0.173939	-3.17991	0.001473	#ERROR!
RPL21P112	THAP9-AS1	-0.16923	0.029287	0.797724	0.005692	3.17859	0.00148	-/+
CLHC1	THAP9-AS1	0.790243	0	-0.18845	0.602095	-3.17763	0.001485	#ERROR!
LOH12CR2	THAP9-AS1	0.664053	0	-0.4303	0.214492	-3.17131	0.001518	#ERROR!
PTGES3L	THAP9-AS1	0.574048	6.66e-16	-0.53939	0.107593	-3.16261	0.001564	#ERROR!
LOC100507283	THAP9-AS1	0.695983	0	-0.3769	0.283003	-3.16027	0.001576	#ERROR!
ANP32D	THAP9-AS1	-0.15922	0.040463	0.797724	0.005692	3.15271	0.001618	-/+
COX20	THAP9-AS1	0.776834	0	-0.21212	0.556306	-3.15226	0.00162	#ERROR!
LOC105379194	THAP9-AS1	0.296897	0.000103	-0.73782	0.014852	-3.1499	0.001633	#ERROR!
OSGIN2	THAP9-AS1	0.785549	0	-0.18788	0.603218	-3.14499	0.001661	#ERROR!
GKAP1	THAP9-AS1	0.775322	0	-0.21212	0.556306	-3.14269	0.001674	#ERROR!
LAMTOR3	THAP9-AS1	0.807558	0	-0.12727	0.726057	-3.1402	0.001688	#ERROR!
FAM20B	THAP9-AS1	0.793966	0	-0.16364	0.651477	-3.13833	0.001699	#ERROR!
E2F6	THAP9-AS1	0.778728	0	-0.2	0.579584	-3.13247	0.001733	#ERROR!
PPP1R12A	THAP9-AS1	0.768287	0	-0.22424	0.533401	-3.13094	0.001743	#ERROR!
PPP1R8	THAP9-AS1	0.768218	0	-0.22424	0.533401	-3.13051	0.001745	#ERROR!
ABRAXAS1	THAP9-AS1	0.728031	0	-0.30909	0.384841	-3.13046	0.001745	#ERROR!
ABHD10	THAP9-AS1	0.80123	0	-0.13939	0.700932	-3.12613	0.001771	#ERROR!
BLOC1S2	THAP9-AS1	0.727	0	-0.30909	0.384841	-3.12495	0.001778	#ERROR!
C12orf29	THAP9-AS1	0.767167	0	-0.22424	0.533401	-3.12407	0.001784	#ERROR!
NSA2	THAP9-AS1	0.733004	0	-0.29697	0.404702	-3.12371	0.001786	#ERROR!
PRDM5	THAP9-AS1	0.661182	0	-0.41818	0.229113	-3.12123	0.001801	#ERROR!
CABCOCO1	THAP9-AS1	0.51211	1.76e-12	-0.58788	0.073878	-3.12024	0.001807	#ERROR!
HCFC2	THAP9-AS1	0.684576	0	-0.38182	0.276255	-3.11989	0.001809	#ERROR!
NUP54	THAP9-AS1	0.804495	0	-0.12727	0.726057	-3.1182	0.00182	#ERROR!
HELQ	THAP9-AS1	0.832535	0	-0.04242	0.907364	-3.11719	0.001826	#ERROR!
MOCS2	THAP9-AS1	0.764924	0	-0.22424	0.533401	-3.11041	0.001868	#ERROR!
C4orf3	THAP9-AS1	0.736076	0	-0.28485	0.425038	-3.10718	0.001889	#ERROR!
EEF1E1	THAP9-AS1	0.774439	0	-0.2	0.579584	-3.10528	0.001901	#ERROR!
RNF13	THAP9-AS1	0.71655	0	-0.32121	0.365468	-3.10392	0.00191	#ERROR!
PITPNB	THAP9-AS1	0.74653	0	-0.26061	0.467089	-3.09967	0.001937	#ERROR!
CTXN2	THAP9-AS1	0.141718	0.068559	-0.79643	0.005829	-3.09874	0.001943	0/-
GLIPR1L1	THAP9-AS1	0.555499	7.99e-15	-0.54054	0.106702	-3.09813	0.001947	#ERROR!
EIF4A2	THAP9-AS1	0.797138	0	-0.13939	0.700932	-3.09764	0.001951	#ERROR!
MOG	THAP9-AS1	0.143537	0.065046	-0.79514	0.005968	-3.09455	0.001971	0/-
GLIPR1L2	THAP9-AS1	0.541202	5.15e-14	-0.55319	0.097169	-3.09212	0.001987	#ERROR!
KIAA1586	THAP9-AS1	0.726375	0	-0.29697	0.404702	-3.08803	0.002015	#ERROR!
ENY2	THAP9-AS1	0.785821	0	-0.16364	0.651477	-3.08382	0.002044	#ERROR!
GPR143	THAP9-AS1	0.304748	6.55e-05	-0.72121	0.018573	-3.08227	0.002054	#ERROR!
RNU6-531P	THAP9-AS1	0.577105	4.44e-16	-0.51243	0.129923	-3.08031	0.002068	#ERROR!
AZI2	THAP9-AS1	0.764966	0	-0.21212	0.556306	-3.07864	0.002079	#ERROR!
AOPEP	THAP9-AS1	0.711623	0	-0.32121	0.365468	-3.07862	0.00208	#ERROR!
KCNIP4	THAP9-AS1	0.769815	0	-0.2	0.579584	-3.07647	0.002095	#ERROR!
CACYBP	THAP9-AS1	0.768911	0	-0.20061	0.578406	-3.07249	0.002123	#ERROR!
RPL34	THAP9-AS1	0.735193	0	-0.27273	0.445838	-3.06926	0.002146	#ERROR!
BBS10	THAP9-AS1	0.702686	0	-0.33333	0.346594	-3.06779	0.002156	#ERROR!
C12orf76	THAP9-AS1	0.788084	0	-0.15152	0.676065	-3.06751	0.002159	#ERROR!
GNPDA2	THAP9-AS1	0.746282	0	-0.24848	0.488776	-3.06565	0.002172	#ERROR!
RNU1-58P	THAP9-AS1	0.297706	9.8e-05	-0.72175	0.018443	-3.0656	0.002172	#ERROR!
PDCD6IPP1	THAP9-AS1	0.500363	6.68e-12	-0.58359	0.076538	-3.06407	0.002184	#ERROR!
RNVU1-4	THAP9-AS1	0.330402	1.38e-05	-0.70353	0.023198	-3.06369	0.002186	#ERROR!
LIPT1	THAP9-AS1	0.750983	0	-0.23636	0.510885	-3.06016	0.002212	#ERROR!
MIR125B1	THAP9-AS1	0.111457	0.152823	-0.80195	0.005259	-3.0598	0.002215	0/-
KRR1	THAP9-AS1	0.795981	0	-0.12727	0.726057	-3.05861	0.002224	#ERROR!
OSTC	THAP9-AS1	0.766805	0	-0.2	0.579584	-3.05798	0.002228	#ERROR!
C9orf57	THAP9-AS1	0.411001	3.79e-08	-0.65173	0.041175	-3.0576	0.002231	#ERROR!
RPL23AP43	THAP9-AS1	0.098068	0.208751	-0.80625	0.004844	-3.05632	0.002241	0/-
RN7SL736P	THAP9-AS1	0.340317	7.25e-06	-0.69631	0.025293	-3.0562	0.002242	#ERROR!
MUSTN1	THAP9-AS1	0.454702	7.55e-10	-0.61905	0.05634	-3.05501	0.002251	#ERROR!
NOS2	THAP9-AS1	0.156032	0.044701	0.878788	0.000814	3.05255	0.002269	#ERROR!
FRG1	THAP9-AS1	0.760323	0	-0.21212	0.556306	-3.05071	0.002283	#ERROR!
RNF7	THAP9-AS1	0.780143	0	-0.16364	0.651477	-3.0469	0.002312	#ERROR!
RASSF3	THAP9-AS1	0.742646	0	-0.24848	0.488776	-3.04512	0.002326	#ERROR!
BTF3L4	THAP9-AS1	0.764444	0	-0.2	0.579584	-3.04362	0.002337	#ERROR!
POLR2K	THAP9-AS1	0.755702	0	-0.21885	0.543551	-3.04112	0.002357	#ERROR!
NSMCE2	THAP9-AS1	0.675164	0	-0.3697	0.29305	-3.04033	0.002363	#ERROR!
RPL36AL	THAP9-AS1	0.674745	0	-0.3697	0.29305	-3.03839	0.002378	#ERROR!
FAM227B	THAP9-AS1	0.746995	0	-0.23636	0.510885	-3.0373	0.002387	#ERROR!
GNG10	THAP9-AS1	0.729086	0	-0.27273	0.445838	-3.03614	0.002396	#ERROR!
ENAH	THAP9-AS1	0.734846	0	-0.26061	0.467089	-3.03453	0.002409	#ERROR!
BBS12	THAP9-AS1	0.666057	0	-0.38182	0.276255	-3.0342	0.002412	#ERROR!
ACTR3P2	THAP9-AS1	-0.4857	3.29e-11	0.588199	0.073681	3.03299	0.002421	-/0
LOC105372273	THAP9-AS1	0.687751	0	-0.34651	0.326657	-3.03252	0.002425	#ERROR!
CRYZL1	THAP9-AS1	0.751484	0	-0.22424	0.533401	-3.03084	0.002439	#ERROR!
RPL9P3	THAP9-AS1	0.432518	5.91e-09	-0.63	0.050907	-3.03065	0.00244	#ERROR!
MYNN	THAP9-AS1	0.804789	0	-0.09091	0.802772	-3.02769	0.002464	#ERROR!
RNF139	THAP9-AS1	0.76039	0	-0.2	0.579584	-3.01926	0.002534	#ERROR!
COX17	THAP9-AS1	0.737898	0	-0.24848	0.488776	-3.01869	0.002539	#ERROR!
CDK17	THAP9-AS1	0.749166	0	-0.22424	0.533401	-3.01749	0.002549	#ERROR!
LINC00276	THAP9-AS1	0.189603	0.01442	-0.76409	0.010079	-3.0143	0.002576	#ERROR!
BRMS1L	THAP9-AS1	0.691581	0	-0.33333	0.346594	-3.01342	0.002583	#ERROR!
CHRNA2	THAP9-AS1	0.171887	0.026802	0.87885	0.000812	3.01224	0.002593	#ERROR!
LOC100506474	THAP9-AS1	0.416759	2.33e-08	-0.63636	0.047912	-3.00902	0.002621	#ERROR!
DCK	THAP9-AS1	0.753018	0	-0.21212	0.556306	-3.00771	0.002632	#ERROR!
ARF4	THAP9-AS1	0.723694	0	-0.27273	0.445838	-3.00742	0.002635	#ERROR!
GIN1	THAP9-AS1	0.741464	0	-0.23636	0.510885	-3.0061	0.002646	#ERROR!
PCNP	THAP9-AS1	0.76729	0	-0.17576	0.627188	-2.99771	0.00272	#ERROR!
PRKAB2	THAP9-AS1	0.756678	0	-0.2	0.579584	-2.99726	0.002724	#ERROR!
CARF	THAP9-AS1	0.780778	0	-0.13939	0.700932	-2.98855	0.002803	#ERROR!
RPL36AP52	THAP9-AS1	0.52381	4.43e-13	-0.54096	0.106374	-2.9871	0.002816	#ERROR!
FBXL5	THAP9-AS1	0.685604	0	-0.33333	0.346594	-2.98482	0.002837	#ERROR!
FAM166B	THAP9-AS1	0.349922	3.81e-06	-0.67478	0.032312	-2.98137	0.00287	#ERROR!
GPN3	THAP9-AS1	0.6917	0	-0.32121	0.365468	-2.97984	0.002884	#ERROR!
LOC374443	THAP9-AS1	0.645481	0	-0.39394	0.259998	-2.97924	0.00289	#ERROR!
METTL4	THAP9-AS1	0.711824	0	-0.28485	0.425038	-2.97887	0.002893	#ERROR!
PAIP1P1	THAP9-AS1	0.634203	0	-0.4098	0.23954	-2.97879	0.002894	#ERROR!
BLOC1S5-TXNDC5	THAP9-AS1	0.631387	0	-0.41338	0.235062	-2.9778	0.002903	#ERROR!
MRFAP1L1	THAP9-AS1	0.810296	0	-0.05455	0.881036	-2.97552	0.002925	#ERROR!
ARMC1	THAP9-AS1	0.752459	0	-0.2	0.579584	-2.97261	0.002953	#ERROR!
CFAP36	THAP9-AS1	0.710389	0	-0.28485	0.425038	-2.97157	0.002963	#ERROR!
FN3KRP	THAP9-AS1	0.696505	0	-0.30909	0.384841	-2.9693	0.002985	#ERROR!
EN2	THAP9-AS1	0.077886	0.318557	0.850415	0.001821	2.96827	0.002995	0/+
PHF13	THAP9-AS1	0.795978	0	-0.09091	0.802772	-2.96598	0.003017	#ERROR!
CENPS	THAP9-AS1	0.771369	0	-0.15339	0.672252	-2.96499	0.003027	#ERROR!
EIF3E	THAP9-AS1	0.781844	0	-0.12727	0.726057	-2.96438	0.003033	#ERROR!
EID2B	THAP9-AS1	0.624489	0	-0.41818	0.229113	-2.96376	0.003039	#ERROR!
COMMD3	THAP9-AS1	0.771886	0	-0.15152	0.676065	-2.96339	0.003043	#ERROR!
KLHL42	THAP9-AS1	0.761618	0	-0.17576	0.627188	-2.96336	0.003043	#ERROR!
DNAJC24	THAP9-AS1	0.755772	0	-0.18788	0.603218	-2.96024	0.003074	#ERROR!
HNRNPDL	THAP9-AS1	0.831968	0	0.018182	0.96024	-2.95998	0.003077	#ERROR!
CFAP58	THAP9-AS1	0.568003	1.33e-15	-0.48632	0.15408	-2.9587	0.003089	#ERROR!
GLI4	THAP9-AS1	0.449499	1.24e-09	0.930095	9.6e-05	2.95674	0.003109	#ERROR!
LIN9	THAP9-AS1	0.731783	0	-0.23636	0.510885	-2.95284	0.003149	#ERROR!
RNU6-353P	THAP9-AS1	0.485366	3.41e-11	0.935819	6.87e-05	2.95242	0.003153	#ERROR!
ARHGEF38-IT1	THAP9-AS1	0.583694	0	-0.46598	0.174656	-2.95157	0.003162	#ERROR!
LOC646216	THAP9-AS1	0.473487	1.17e-10	-0.57715	0.080649	-2.95096	0.003168	#ERROR!
LZTFL1	THAP9-AS1	0.759405	0	-0.17576	0.627188	-2.95016	0.003176	#ERROR!
BCDIN3D-AS1	THAP9-AS1	0.70368	0	-0.28837	0.41909	-2.94745	0.003204	#ERROR!
MECOM-AS1	THAP9-AS1	0.473593	1.16e-10	-0.57599	0.081403	-2.94693	0.003209	#ERROR!
MED12L	THAP9-AS1	0.513566	1.49e-12	-0.53939	0.107593	-2.94626	0.003216	#ERROR!
LINC00339	THAP9-AS1	0.703812	0	-0.28485	0.425038	-2.93847	0.003298	#ERROR!
LOC100289118	THAP9-AS1	-0.62715	0	0.406181	0.244129	2.93838	0.003299	-/0
MBNL1	THAP9-AS1	0.767582	0	-0.15152	0.676065	-2.93681	0.003316	#ERROR!
C4orf46	THAP9-AS1	0.762309	0	-0.16364	0.651477	-2.9361	0.003324	#ERROR!
IGHJ2	THAP9-AS1	-0.23405	0.002406	0.729487	0.016647	2.93426	0.003343	-/+
RNF11	THAP9-AS1	0.733664	0	-0.22424	0.533401	-2.93084	0.00338	#ERROR!
RPL7P44	THAP9-AS1	0.628591	0	-0.4013	0.250385	-2.92971	0.003393	#ERROR!
C6orf58	THAP9-AS1	0.529246	2.29e-13	-0.51861	0.124578	-2.92781	0.003414	#ERROR!
ERGIC2	THAP9-AS1	0.733003	0	-0.22424	0.533401	-2.92725	0.00342	#ERROR!
MALAT1	THAP9-AS1	0.026788	0.731903	0.830303	0.00294	2.92476	0.003447	0/+
RNF146	THAP9-AS1	0.752004	0	-0.18237	0.614068	-2.92393	0.003456	#ERROR!
MTMR7	THAP9-AS1	0.700879	0	-0.28485	0.425038	-2.9239	0.003457	#ERROR!
INSYN2A	THAP9-AS1	0.554251	9.33e-15	-0.49091	0.149656	-2.92334	0.003463	#ERROR!
BTG3	THAP9-AS1	0.706998	0	-0.27273	0.445838	-2.92136	0.003485	#ERROR!
RP9P	THAP9-AS1	0.769606	0	-0.13939	0.700932	-2.91809	0.003522	#ERROR!
CA5B	THAP9-AS1	0.650637	0	-0.36474	0.300067	-2.91578	0.003548	#ERROR!
CIBAR1	THAP9-AS1	0.692065	0	-0.29697	0.404702	-2.91415	0.003567	#ERROR!
AMZ2P1	THAP9-AS1	0.718234	0	-0.24848	0.488776	-2.91336	0.003576	#ERROR!
BPGM	THAP9-AS1	0.718127	0	-0.24848	0.488776	-2.9128	0.003582	#ERROR!
KRT18P31	THAP9-AS1	-0.21201	0.006103	0.736252	0.015179	2.91269	0.003583	-/+
FAM200B	THAP9-AS1	0.796901	0	-0.06667	0.854813	-2.91095	0.003603	#ERROR!
RPL7AP62	THAP9-AS1	0.590892	0	-0.44377	0.198893	-2.90874	0.003629	#ERROR!
LNCOC1	THAP9-AS1	0.469607	1.74e-10	-0.56883	0.086161	-2.90725	0.003646	#ERROR!
LOC100506551	THAP9-AS1	0.594174	0	-0.43913	0.204189	-2.90697	0.003649	#ERROR!
RBIS	THAP9-AS1	0.782301	0	-0.10303	0.776998	-2.90552	0.003666	#ERROR!
FAM204A	THAP9-AS1	0.746188	0	-0.18788	0.603218	-2.90493	0.003673	#ERROR!
RHOQ	THAP9-AS1	0.728775	0	-0.22424	0.533401	-2.90441	0.00368	#ERROR!
FYTTD1	THAP9-AS1	0.756766	0	-0.16364	0.651477	-2.90313	0.003694	#ERROR!
GAS2L3	THAP9-AS1	0.75136	0	-0.17576	0.627188	-2.90301	0.003696	#ERROR!
KCNJ12	THAP9-AS1	0.213539	0.005738	0.878788	0.000814	2.90268	0.0037	#ERROR!
FAM200A	THAP9-AS1	0.716093	0	-0.24848	0.488776	-2.90226	0.003705	#ERROR!
FGFR1OP2	THAP9-AS1	0.772014	0	-0.12727	0.726057	-2.90197	0.003708	#ERROR!
BNIP3P40	THAP9-AS1	0.340235	7.29e-06	-0.66332	0.036534	-2.90153	0.003713	#ERROR!
C5orf60	THAP9-AS1	0.135321	0.082154	0.858855	0.001459	2.90083	0.003722	0/+
OTUD6B	THAP9-AS1	0.799829	0	-0.05455	0.881036	-2.90066	0.003724	#ERROR!
NECAB1	THAP9-AS1	0.643522	0	-0.3697	0.29305	-2.89939	0.003739	#ERROR!
RPL27P4	THAP9-AS1	-0.67161	0	0.326192	0.357652	2.89938	0.003739	-/0
RGS10	THAP9-AS1	0.635006	0	-0.38182	0.276255	-2.89866	0.003748	#ERROR!
PAIP2	THAP9-AS1	0.739007	0	-0.2	0.579584	-2.89633	0.003776	#ERROR!
LCN8	THAP9-AS1	0.050181	0.520835	0.833996	0.002705	2.89602	0.003779	0/+
LPP	THAP9-AS1	0.755002	0	-0.16364	0.651477	-2.89278	0.003818	#ERROR!
CNBP	THAP9-AS1	0.802974	0	-0.04242	0.907364	-2.8922	0.003826	#ERROR!
C11orf58	THAP9-AS1	0.726405	0	-0.22424	0.533401	-2.89173	0.003831	#ERROR!
PSMA6	THAP9-AS1	0.672985	0	-0.32121	0.365468	-2.89169	0.003832	#ERROR!
CETN2	THAP9-AS1	0.64146	0	-0.3697	0.29305	-2.89055	0.003846	#ERROR!
RPL9P27	THAP9-AS1	0.397673	1.12e-07	-0.62161	0.055036	-2.89002	0.003852	#ERROR!
INAFM2	THAP9-AS1	0.726077	0	-0.22424	0.533401	-2.88999	0.003853	#ERROR!
MRPS6	THAP9-AS1	0.725707	0	-0.22424	0.533401	-2.88802	0.003877	#ERROR!
CAMLG	THAP9-AS1	0.700131	0	-0.27273	0.445838	-2.88714	0.003888	#ERROR!
NDUFA5	THAP9-AS1	0.774114	0	-0.11515	0.75142	-2.88415	0.003925	#ERROR!
CAPZA2	THAP9-AS1	0.663715	0	-0.33333	0.346594	-2.8837	0.00393	#ERROR!
CLK4	THAP9-AS1	0.826165	0	0.030303	0.933773	-2.88274	0.003942	#ERROR!
RCHY1	THAP9-AS1	0.778604	0	-0.10303	0.776998	-2.88172	0.003955	#ERROR!
CFAP97	THAP9-AS1	0.787783	0	-0.07879	0.828717	-2.87996	0.003977	#ERROR!
PSMA3	THAP9-AS1	0.741167	0	-0.18788	0.603218	-2.87666	0.004019	#ERROR!
RAB12	THAP9-AS1	0.729522	0	-0.21212	0.556306	-2.87639	0.004023	#ERROR!
FCGR1B	THAP9-AS1	0.383438	3.41e-07	-0.62806	0.051841	-2.87437	0.004048	#ERROR!
RPL21P134	THAP9-AS1	0.722964	0	-0.22424	0.533401	-2.8735	0.00406	#ERROR!
DUXAP1	THAP9-AS1	0.684786	0	-0.29485	0.40823	-2.87347	0.00406	#ERROR!
CPLX4	THAP9-AS1	0.093678	0.229953	0.844232	0.002125	2.87306	0.004065	0/+
MBNL1-AS1	THAP9-AS1	0.716684	0	-0.23636	0.510885	-2.87291	0.004067	#ERROR!
PALLD	THAP9-AS1	0.601417	0	-0.41818	0.229113	-2.87074	0.004095	#ERROR!
CCNC	THAP9-AS1	0.721777	0	-0.22424	0.533401	-2.86725	0.004141	#ERROR!
MRPL2P1	THAP9-AS1	-0.50793	2.85e-12	0.522233	0.121503	2.86694	0.004145	-/0
GYG1	THAP9-AS1	0.635827	0	-0.3697	0.29305	-2.86661	0.004149	#ERROR!
RPL7AP32	THAP9-AS1	0.336891	9.07e-06	-0.65752	0.038809	-2.86614	0.004155	#ERROR!
EEF1A1P24	THAP9-AS1	0.579562	4.44e-16	-0.44377	0.198893	-2.86538	0.004165	#ERROR!
CRBN	THAP9-AS1	0.739086	0	-0.18788	0.603218	-2.86508	0.004169	#ERROR!
GTF2E1	THAP9-AS1	0.744343	0	-0.17629	0.626123	-2.86433	0.004179	#ERROR!
IKZF5	THAP9-AS1	0.794495	0	-0.05455	0.881036	-2.86383	0.004186	#ERROR!
CBWD3	THAP9-AS1	0.838456	0	0.078788	0.828717	-2.86105	0.004222	#ERROR!
JADE1	THAP9-AS1	0.765177	0	-0.12727	0.726057	-2.85993	0.004237	#ERROR!
ALKBH2	THAP9-AS1	0.680169	0	-0.29697	0.404702	-2.85758	0.004269	#ERROR!
MTMR6	THAP9-AS1	0.665147	0	-0.32121	0.365468	-2.85599	0.00429	#ERROR!
RPL18P12	THAP9-AS1	-0.56741	1.55e-15	0.455008	0.1864	2.85523	0.004301	-/0
MIR186	THAP9-AS1	0.715628	0	-0.231	0.520792	-2.85319	0.004328	#ERROR!
RPL21P20	THAP9-AS1	0.590055	0	-0.42684	0.218617	-2.85293	0.004332	#ERROR!
MED28	THAP9-AS1	0.797328	0	-0.04242	0.907364	-2.85271	0.004335	#ERROR!
KCNAB3	THAP9-AS1	0.536487	9.35e-14	0.939394	5.48e-05	2.85264	0.004336	#ERROR!
DNAJC8	THAP9-AS1	0.758747	0	-0.13939	0.700932	-2.85241	0.004339	#ERROR!
METTL5	THAP9-AS1	0.753362	0	-0.15152	0.676065	-2.85193	0.004345	#ERROR!
CDKN2AIP	THAP9-AS1	0.801118	0	-0.0303	0.933773	-2.84857	0.004392	#ERROR!
LOC101927026	THAP9-AS1	0.383091	3.5e-07	-0.62196	0.054859	-2.84816	0.004397	#ERROR!
CAMK2G	THAP9-AS1	0.763156	0	-0.12727	0.726057	-2.84771	0.004404	#ERROR!
GUSBP2	THAP9-AS1	0.694146	0	0.963128	7.73e-06	2.84724	0.00441	#ERROR!
ATG12	THAP9-AS1	0.746952	0	-0.16364	0.651477	-2.84632	0.004423	#ERROR!
MIR378J	THAP9-AS1	0.609022	0	-0.39992	0.25217	-2.84577	0.00443	#ERROR!
NKAPD1	THAP9-AS1	0.772778	0	-0.10303	0.776998	-2.84491	0.004442	#ERROR!
MITD1	THAP9-AS1	0.821249	0	0.030303	0.933773	-2.84427	0.004451	#ERROR!
CYRIB	THAP9-AS1	0.746204	0	-0.16364	0.651477	-2.84207	0.004482	#ERROR!
C14orf28	THAP9-AS1	0.729033	0	-0.2	0.579584	-2.84191	0.004484	#ERROR!
GOLM2	THAP9-AS1	0.697047	0	-0.26061	0.467089	-2.83914	0.004524	#ERROR!
CSDE1	THAP9-AS1	0.776681	0	-0.09091	0.802772	-2.83869	0.00453	#ERROR!
PCMTD1	THAP9-AS1	0.781069	0	-0.07879	0.828717	-2.83604	0.004568	#ERROR!
GTF2A2	THAP9-AS1	0.675516	0	-0.29697	0.404702	-2.83592	0.004569	#ERROR!
C8orf48	THAP9-AS1	0.434622	4.89e-09	-0.57928	0.079272	-2.83579	0.004571	#ERROR!
EXTL2	THAP9-AS1	0.750298	0	-0.15152	0.676065	-2.8342	0.004594	#ERROR!
PARL	THAP9-AS1	0.760713	0	-0.12727	0.726057	-2.83305	0.004611	#ERROR!
AGBL3	THAP9-AS1	0.714805	0	-0.22424	0.533401	-2.831	0.00464	#ERROR!
MSANTD3-TMEFF1	THAP9-AS1	0.517702	9.16e-13	-0.50187	0.139398	-2.83084	0.004643	#ERROR!
MIR2052HG	THAP9-AS1	0.232079	0.002623	-0.71067	0.021244	-2.83066	0.004645	#ERROR!
KCTD6	THAP9-AS1	0.720693	0	-0.21212	0.556306	-2.82954	0.004662	#ERROR!
FBXO30	THAP9-AS1	0.75416	0	-0.13939	0.700932	-2.82542	0.004722	#ERROR!
ANKRD40	THAP9-AS1	0.731676	0	-0.18788	0.603218	-2.82447	0.004736	#ERROR!
LOC105378083	THAP9-AS1	0.675759	0	-0.29179	0.413327	-2.82279	0.004761	#ERROR!
EEF1AKMT1	THAP9-AS1	0.64994	0	-0.33333	0.346594	-2.82273	0.004762	#ERROR!
DNAI2	THAP9-AS1	0.213556	0.005734	0.871231	0.001027	2.82148	0.00478	#ERROR!
PFDN1	THAP9-AS1	0.724977	0	-0.2	0.579584	-2.82026	0.004798	#ERROR!
PSMC6	THAP9-AS1	0.75851	0	-0.12727	0.726057	-2.81995	0.004803	#ERROR!
RBM18	THAP9-AS1	0.773506	0	-0.09091	0.802772	-2.81868	0.004822	#ERROR!
CLIP1	THAP9-AS1	0.763355	0	-0.11515	0.75142	-2.81795	0.004833	#ERROR!
PDE4D	THAP9-AS1	0.692611	0	-0.26061	0.467089	-2.81756	0.004839	#ERROR!
EPM2A	THAP9-AS1	0.698995	0	-0.24848	0.488776	-2.81609	0.004861	#ERROR!
MTERF3	THAP9-AS1	0.804882	0	-0.00606	0.986743	-2.81421	0.00489	#ERROR!
KBTBD3	THAP9-AS1	0.698588	0	-0.24848	0.488776	-2.81408	0.004892	#ERROR!
CNPY1	THAP9-AS1	0.252399	0.001036	-0.69631	0.025293	-2.81343	0.004902	#ERROR!
FAM157A	THAP9-AS1	0.223408	0.003812	0.872617	0.000985	2.80999	0.004954	#ERROR!
NFYB	THAP9-AS1	0.781781	0	-0.06667	0.854813	-2.80997	0.004955	#ERROR!
LSM5	THAP9-AS1	0.716868	0	-0.21212	0.556306	-2.80963	0.00496	#ERROR!
AMD1	THAP9-AS1	0.751432	0	-0.13939	0.700932	-2.80958	0.004961	#ERROR!
GPR180	THAP9-AS1	0.734456	0	-0.17576	0.627188	-2.80805	0.004984	#ERROR!
NIFK	THAP9-AS1	0.771572	0	-0.09091	0.802772	-2.8066	0.005007	#ERROR!
FNTA	THAP9-AS1	0.716017	0	-0.21212	0.556306	-2.80523	0.005028	#ERROR!
HPF1	THAP9-AS1	0.75047	0	-0.13939	0.700932	-2.80403	0.005047	#ERROR!
RPL35AP10	THAP9-AS1	0.248629	0.001238	-0.69631	0.025293	-2.80331	0.005058	#ERROR!
DNAJC19	THAP9-AS1	0.780666	0	-0.06667	0.854813	-2.80277	0.005067	#ERROR!
LINC00367	THAP9-AS1	0.476419	8.69e-11	-0.53383	0.111986	-2.80275	0.005067	#ERROR!
NTAQ1	THAP9-AS1	0.727601	0	-0.18788	0.603218	-2.80254	0.00507	#ERROR!
FAM216A	THAP9-AS1	0.628479	0	-0.35758	0.310376	-2.80066	0.0051	#ERROR!
BCAS2	THAP9-AS1	0.7552	0	-0.12727	0.726057	-2.80045	0.005103	#ERROR!
MFSD14A	THAP9-AS1	0.784931	0	-0.05455	0.881036	-2.79988	0.005112	#ERROR!
NAP1L1P1	THAP9-AS1	0.645809	0	-0.33141	0.349552	-2.79938	0.00512	#ERROR!
NBN	THAP9-AS1	0.727008	0	-0.18788	0.603218	-2.79938	0.00512	#ERROR!
PGLYRP4	THAP9-AS1	-0.02864	0.714125	0.794552	0.006032	2.79893	0.005127	0/+
MOB1B	THAP9-AS1	0.802633	0	-0.00606	0.986743	-2.79822	0.005139	#ERROR!
BTC	THAP9-AS1	0.708135	0	-0.22424	0.533401	-2.79701	0.005158	#ERROR!
PAK1IP1	THAP9-AS1	0.74375	0	-0.15152	0.676065	-2.79691	0.005159	#ERROR!
FYCO1	THAP9-AS1	0.737997	0	-0.16364	0.651477	-2.7961	0.005172	#ERROR!
LOC107985122	THAP9-AS1	-0.01868	0.81122	0.797724	0.005692	2.79563	0.00518	0/+
HMGN4	THAP9-AS1	0.737787	0	-0.16364	0.651477	-2.79494	0.005191	#ERROR!
CEACAM19	THAP9-AS1	0.420164	1.74e-08	0.915152	0.000204	2.79425	0.005202	#ERROR!
RPP14	THAP9-AS1	0.797535	0	-0.01818	0.96024	-2.79308	0.005221	#ERROR!
ANAPC16	THAP9-AS1	0.743003	0	-0.15152	0.676065	-2.79271	0.005227	#ERROR!
RPL35A	THAP9-AS1	0.725693	0	-0.18788	0.603218	-2.79237	0.005232	#ERROR!
DMBT1	THAP9-AS1	-0.08972	0.250339	0.769697	0.009222	2.79197	0.005239	0/+
ARRDC3	THAP9-AS1	0.658214	0	-0.30909	0.384841	-2.79109	0.005253	#ERROR!
GCFC2	THAP9-AS1	0.773924	0	-0.07879	0.828717	-2.79057	0.005261	#ERROR!
GSTT2	THAP9-AS1	0.342837	6.14e-06	-0.63591	0.04812	-2.78955	0.005278	#ERROR!
LYPLAL1	THAP9-AS1	0.706231	0	-0.22493	0.532122	-2.78924	0.005283	#ERROR!
COPS5	THAP9-AS1	0.792418	0	-0.0303	0.933773	-2.7886	0.005294	#ERROR!
KPNA4	THAP9-AS1	0.778413	0	-0.06667	0.854813	-2.78832	0.005298	#ERROR!
RNU6-431P	THAP9-AS1	0.61311	0	-0.37451	0.286314	-2.78695	0.005321	#ERROR!
KRBOX4	THAP9-AS1	0.724531	0	-0.18788	0.603218	-2.78621	0.005333	#ERROR!
RPL5P29	THAP9-AS1	0.666203	0	-0.29359	0.410324	-2.78399	0.005369	#ERROR!
AZIN1	THAP9-AS1	0.767856	0	-0.09091	0.802772	-2.78366	0.005375	#ERROR!
OBI1	THAP9-AS1	0.724032	0	-0.18788	0.603218	-2.78356	0.005377	#ERROR!
EIF4BP8	THAP9-AS1	-0.02546	0.744759	0.793293	0.006172	2.78233	0.005397	0/+
OSTM1	THAP9-AS1	0.692047	0	-0.24848	0.488776	-2.78222	0.005399	#ERROR!
RNU6-1011P	THAP9-AS1	0.55135	1.38e-14	-0.45022	0.191665	-2.78127	0.005415	#ERROR!
PPP2R3C	THAP9-AS1	0.670504	0	-0.28485	0.425038	-2.77955	0.005443	#ERROR!
PRMT3	THAP9-AS1	0.740614	0	-0.15152	0.676065	-2.77934	0.005447	#ERROR!
LRRC39	THAP9-AS1	0.808401	0	0.018237	0.960119	-2.77841	0.005463	#ERROR!
GTF2H1	THAP9-AS1	0.771933	0	-0.07879	0.828717	-2.77813	0.005467	#ERROR!
CCDC146	THAP9-AS1	0.761512	0	-0.10303	0.776998	-2.77601	0.005503	#ERROR!
LIN7C	THAP9-AS1	0.816083	0	0.042424	0.907364	-2.77431	0.005532	#ERROR!
MYOT	THAP9-AS1	0.424137	1.24e-08	-0.57143	0.084412	-2.77391	0.005539	#ERROR!
EFCAB7	THAP9-AS1	0.776135	0	-0.06667	0.854813	-2.77384	0.00554	#ERROR!
RBM20	THAP9-AS1	0.638534	0	-0.33333	0.346594	-2.77366	0.005543	#ERROR!
PDIK1L	THAP9-AS1	0.823898	0	0.066667	0.854813	-2.77316	0.005552	#ERROR!
COX16	THAP9-AS1	0.733581	0	-0.16364	0.651477	-2.77187	0.005574	#ERROR!
HOMER1	THAP9-AS1	0.68961	0	-0.24848	0.488776	-2.77049	0.005597	#ERROR!
BRK1	THAP9-AS1	0.696195	0	-0.23636	0.510885	-2.76996	0.005606	#ERROR!
LINC01695	THAP9-AS1	0.323402	2.14e-05	-0.64411	0.044428	-2.7695	0.005614	#ERROR!
MTFR1L	THAP9-AS1	0.775336	0	-0.06667	0.854813	-2.76879	0.005626	#ERROR!
MFF-DT	THAP9-AS1	0.692213	0	-0.24316	0.498434	-2.76876	0.005627	#ERROR!
LLPH	THAP9-AS1	0.749708	0	-0.12727	0.726057	-2.76859	0.00563	#ERROR!
DNAJB9	THAP9-AS1	0.660407	0	-0.29697	0.404702	-2.76726	0.005653	#ERROR!
RMDN1	THAP9-AS1	0.784605	0	-0.04242	0.907364	-2.76717	0.005655	#ERROR!
RAMAC	THAP9-AS1	0.72665	0	-0.17576	0.627188	-2.76592	0.005676	#ERROR!
GABRG1	THAP9-AS1	0.168309	0.030188	-0.73012	0.016506	-2.76519	0.005689	#ERROR!
AMDHD1	THAP9-AS1	0.449948	1.19e-09	-0.54711	0.101678	-2.76515	0.00569	#ERROR!
IFTAP	THAP9-AS1	0.694861	0	-0.23636	0.510885	-2.76345	0.005719	#ERROR!
CFAP69	THAP9-AS1	0.759026	0	-0.10303	0.776998	-2.76118	0.005759	#ERROR!
LOC100507291	THAP9-AS1	0.707367	0	-0.21212	0.556306	-2.76112	0.00576	#ERROR!
ABCC2	THAP9-AS1	0.272125	0.00039	0.880104	0.00078	2.76058	0.00577	#ERROR!
LIN52	THAP9-AS1	0.758757	0	-0.10303	0.776998	-2.75958	0.005787	#ERROR!
ILK	THAP9-AS1	0.626813	0	-0.34545	0.328227	-2.75895	0.005799	#ERROR!
CORO1C	THAP9-AS1	0.712805	0	-0.2	0.579584	-2.75687	0.005836	#ERROR!
LIG4	THAP9-AS1	0.765864	0	-0.08511	0.815172	-2.75678	0.005837	#ERROR!
CCDC58	THAP9-AS1	0.796482	0	-0.00606	0.986743	-2.75531	0.005864	#ERROR!
ACTR10	THAP9-AS1	0.724468	0	-0.17576	0.627188	-2.75433	0.005881	#ERROR!
PRIMPOL	THAP9-AS1	0.786989	0	-0.0303	0.933773	-2.75231	0.005918	#ERROR!
GNG11	THAP9-AS1	0.528387	2.54e-13	-0.46667	0.173939	-2.75211	0.005921	#ERROR!
C9orf72	THAP9-AS1	0.735461	0	-0.15152	0.676065	-2.75087	0.005944	#ERROR!
PSMA2	THAP9-AS1	0.72378	0	-0.17576	0.627188	-2.75069	0.005947	#ERROR!
IGHEP1	THAP9-AS1	0.214089	0.005611	0.864346	0.001254	2.74989	0.005961	#ERROR!
POLI	THAP9-AS1	0.735271	0	-0.15152	0.676065	-2.74982	0.005963	#ERROR!
RPL24P5	THAP9-AS1	0.211867	0.006139	-0.7049	0.022812	-2.74809	0.005994	#ERROR!
PTGES3	THAP9-AS1	0.771915	0	-0.06667	0.854813	-2.74735	0.006008	#ERROR!
CCDC82	THAP9-AS1	0.751364	0	-0.11515	0.75142	-2.74717	0.006011	#ERROR!
POLR2M	THAP9-AS1	0.704518	0	-0.21212	0.556306	-2.74683	0.006017	#ERROR!
LINC02601	THAP9-AS1	0.219321	0.004525	-0.70065	0.024019	-2.7466	0.006022	#ERROR!
HIPK3	THAP9-AS1	0.745694	0	-0.12727	0.726057	-2.74568	0.006038	#ERROR!
LRP2BP	THAP9-AS1	0.812183	0	0.042424	0.907364	-2.7452	0.006047	#ERROR!
PDE1A	THAP9-AS1	0.478526	6.99e-11	-0.51515	0.127553	-2.74477	0.006055	#ERROR!
PPP1R2	THAP9-AS1	0.745002	0	-0.12727	0.726057	-2.74177	0.006111	#ERROR!
DEPDC1	THAP9-AS1	0.690242	0	-0.23636	0.510885	-2.74112	0.006123	#ERROR!
RPL37P6	THAP9-AS1	0.657618	0	-0.29179	0.413327	-2.7406	0.006133	#ERROR!
MTRF1LP1	THAP9-AS1	0.224921	0.003575	-0.69631	0.025293	-2.74011	0.006142	#ERROR!
CLIC4	THAP9-AS1	0.66166	0	-0.28485	0.425038	-2.73954	0.006152	#ERROR!
CAMSAP2	THAP9-AS1	0.721466	0	-0.17576	0.627188	-2.7385	0.006172	#ERROR!
CWC15	THAP9-AS1	0.738859	0	-0.13939	0.700932	-2.73843	0.006173	#ERROR!
GALNT15	THAP9-AS1	0.436341	4.19e-09	-0.55152	0.098401	-2.7384	0.006174	#ERROR!
FOXN2	THAP9-AS1	0.765441	0	-0.07879	0.828717	-2.7382	0.006178	#ERROR!
PEA15	THAP9-AS1	0.661265	0	-0.28485	0.425038	-2.73778	0.006186	#ERROR!
PSME2P6	THAP9-AS1	-0.44897	1.3e-09	0.540295	0.106892	2.73772	0.006187	-/0
PIH1D2	THAP9-AS1	0.705551	0	-0.20669	0.566695	-2.7377	0.006187	#ERROR!
CCDC59	THAP9-AS1	0.755041	0	-0.10303	0.776998	-2.73769	0.006187	#ERROR!
DYNLT3	THAP9-AS1	0.696099	0	-0.22424	0.533401	-2.73728	0.006195	#ERROR!
PPA1	THAP9-AS1	0.682543	0	-0.24848	0.488776	-2.73689	0.006202	#ERROR!
COMMD2	THAP9-AS1	0.726442	0	-0.16364	0.651477	-2.73341	0.006268	#ERROR!
FAM172A	THAP9-AS1	0.70792	0	-0.2	0.579584	-2.73205	0.006294	#ERROR!
PCDH11Y	THAP9-AS1	0.157454	0.042767	0.846658	0.002002	2.73135	0.006307	#ERROR!
ARL3	THAP9-AS1	0.628354	0	-0.33333	0.346594	-2.73087	0.006317	#ERROR!
RAD21-AS1	THAP9-AS1	0.63972	0	-0.31611	0.373561	-2.73025	0.006329	#ERROR!
LINC01259	THAP9-AS1	0.218162	0.004748	-0.69743	0.02496	-2.72769	0.006378	#ERROR!
C2orf49	THAP9-AS1	0.763638	0	-0.07879	0.828717	-2.72728	0.006386	#ERROR!
MOSPD1	THAP9-AS1	0.658512	0	-0.28485	0.425038	-2.72551	0.00642	#ERROR!
LARP1B	THAP9-AS1	0.86458	0	0.224242	0.533401	-2.72539	0.006423	#ERROR!
CEACAM21	THAP9-AS1	0.402351	7.72e-08	-0.57576	0.081553	-2.72403	0.006449	#ERROR!
LYSMD1	THAP9-AS1	0.736233	0	-0.13939	0.700932	-2.72394	0.006451	#ERROR!
COA5	THAP9-AS1	0.747309	0	-0.11515	0.75142	-2.72391	0.006451	#ERROR!
BAG4	THAP9-AS1	0.747231	0	-0.11515	0.75142	-2.72346	0.00646	#ERROR!
CYP3A43	THAP9-AS1	0.366456	1.2e-06	-0.60302	0.064969	-2.72318	0.006466	#ERROR!
RPL23AP49	THAP9-AS1	0.435994	4.32e-09	-0.54711	0.101678	-2.72147	0.006499	#ERROR!
PGM5P2	THAP9-AS1	0.732475	0	-0.14634	0.686641	-2.72127	0.006503	#ERROR!
CHMP2B	THAP9-AS1	0.746788	0	-0.11515	0.75142	-2.72094	0.00651	#ERROR!
FBXO9	THAP9-AS1	0.735512	0	-0.13939	0.700932	-2.71999	0.006528	#ERROR!
LOC105371855	THAP9-AS1	0.379829	4.48e-07	-0.59213	0.0713	-2.71965	0.006535	#ERROR!
KATNBL1	THAP9-AS1	0.735262	0	-0.13939	0.700932	-2.71862	0.006556	#ERROR!
PDC-AS1	THAP9-AS1	0.657736	0	-0.28322	0.427805	-2.7176	0.006576	#ERROR!
ATP13A4	THAP9-AS1	0.282794	0.000223	0.878788	0.000814	2.71688	0.00659	#ERROR!
MAD2L1	THAP9-AS1	0.704597	0	-0.2	0.579584	-2.71537	0.00662	#ERROR!
DGKE	THAP9-AS1	0.740291	0	-0.12727	0.726057	-2.71533	0.006621	#ERROR!
MAK	THAP9-AS1	0.766314	0	-0.06749	0.853037	-2.71493	0.006629	#ERROR!
CDC37L1	THAP9-AS1	0.785919	0	-0.01818	0.96024	-2.71473	0.006633	#ERROR!
C5orf24	THAP9-AS1	0.734136	0	-0.13939	0.700932	-2.71246	0.006679	#ERROR!
IFITM9P	THAP9-AS1	0.032374	0.678827	0.804054	0.005053	2.71156	0.006697	0/+
MRPL33	THAP9-AS1	0.683959	0	-0.23636	0.510885	-2.71117	0.006705	#ERROR!
BMPR1A	THAP9-AS1	0.755711	0	-0.09091	0.802772	-2.71083	0.006712	#ERROR!
RNU7-123P	THAP9-AS1	0.591344	0	-0.37763	0.282001	-2.71013	0.006726	#ERROR!
METTL6	THAP9-AS1	0.755558	0	-0.09091	0.802772	-2.70993	0.00673	#ERROR!
MIR4731	THAP9-AS1	0.074813	0.338084	0.81838	0.003799	2.70992	0.00673	0/+
ADAMTS9-AS1	THAP9-AS1	0.614806	0	-0.34545	0.328227	-2.70978	0.006733	#ERROR!
FKBP7	THAP9-AS1	0.662269	0	-0.27273	0.445838	-2.7092	0.006745	#ERROR!
ARL1	THAP9-AS1	0.727765	0	-0.15152	0.676065	-2.70919	0.006745	#ERROR!
ARL6IP5	THAP9-AS1	0.696615	0	-0.21212	0.556306	-2.70777	0.006774	#ERROR!
POC1B	THAP9-AS1	0.709275	0	-0.18788	0.603218	-2.70721	0.006785	#ERROR!
C11orf53	THAP9-AS1	0.113425	0.14566	0.830303	0.00294	2.70553	0.006819	0/+
ANGPTL1	THAP9-AS1	0.479104	6.58e-11	-0.50303	0.138334	-2.70548	0.006821	#ERROR!
KANSL2	THAP9-AS1	0.738133	0	-0.12727	0.726057	-2.70336	0.006864	#ERROR!
LIPA	THAP9-AS1	0.604459	0	-0.35758	0.310376	-2.70315	0.006869	#ERROR!
MIR302A	THAP9-AS1	0.202803	0.008781	-0.70065	0.024019	-2.7031	0.00687	#ERROR!
KPNA5	THAP9-AS1	0.732221	0	-0.13939	0.700932	-2.70204	0.006892	#ERROR!
PDCD10	THAP9-AS1	0.688694	0	-0.22424	0.533401	-2.70148	0.006903	#ERROR!
METTL9	THAP9-AS1	0.701793	0	-0.2	0.579584	-2.70141	0.006905	#ERROR!
LOC100422562	THAP9-AS1	-0.54815	2.11e-14	0.428174	0.21702	2.70099	0.006913	-/0
DRAM2	THAP9-AS1	0.778894	0	-0.0303	0.933773	-2.69967	0.006941	#ERROR!
DPY19L4	THAP9-AS1	0.753639	0	-0.09091	0.802772	-2.69872	0.006961	#ERROR!
PHOSPHO2	THAP9-AS1	0.737072	0	-0.12766	0.72525	-2.6985	0.006965	#ERROR!
NUP35	THAP9-AS1	0.731526	0	-0.13939	0.700932	-2.69827	0.00697	#ERROR!
EIF5AP2	THAP9-AS1	-0.20446	0.008235	0.698611	0.024612	2.69739	0.006988	-/+
KBTBD6	THAP9-AS1	0.700841	0	-0.2	0.579584	-2.6967	0.007003	#ERROR!
CDON	THAP9-AS1	0.700517	0	-0.2	0.579584	-2.6951	0.007037	#ERROR!
CD58	THAP9-AS1	0.700514	0	-0.2	0.579584	-2.69508	0.007037	#ERROR!
RPL37P17	THAP9-AS1	0.167783	0.030716	-0.71693	0.019629	-2.69416	0.007057	#ERROR!
CEP20	THAP9-AS1	0.752555	0	-0.09091	0.802772	-2.69241	0.007094	#ERROR!
CD59	THAP9-AS1	0.610289	0	-0.34545	0.328227	-2.69159	0.007111	#ERROR!
RPL39	THAP9-AS1	0.706061	0	-0.18788	0.603218	-2.69101	0.007124	#ERROR!
C10orf88	THAP9-AS1	0.76756	0	-0.05488	0.880313	-2.69069	0.007131	#ERROR!
MIR325HG	THAP9-AS1	0.373013	7.44e-07	-0.58969	0.072771	-2.69023	0.00714	#ERROR!
CMC2	THAP9-AS1	0.740676	0	-0.11515	0.75142	-2.68652	0.00722	#ERROR!
PFDN4	THAP9-AS1	0.671683	0	-0.24848	0.488776	-2.68642	0.007222	#ERROR!
NAA20	THAP9-AS1	0.641572	0	-0.29697	0.404702	-2.685	0.007253	#ERROR!
ALG5	THAP9-AS1	0.663949	0	-0.26061	0.467089	-2.68391	0.007277	#ERROR!
PHTF2	THAP9-AS1	0.722954	0	-0.15152	0.676065	-2.68364	0.007282	#ERROR!
EIF1B-AS1	THAP9-AS1	0.571478	8.88e-16	-0.39394	0.259998	-2.68282	0.0073	#ERROR!
IGIP	THAP9-AS1	0.750726	0	-0.09091	0.802772	-2.68184	0.007322	#ERROR!
ANKRD49	THAP9-AS1	0.750632	0	-0.09091	0.802772	-2.68129	0.007334	#ERROR!
EID3	THAP9-AS1	0.636007	0	-0.30395	0.393201	-2.68065	0.007348	#ERROR!
RAB11FIP2	THAP9-AS1	0.716187	0	-0.16364	0.651477	-2.67961	0.007371	#ERROR!
CRYZ	THAP9-AS1	0.632224	0	-0.30909	0.384841	-2.67901	0.007384	#ERROR!
CMSS1	THAP9-AS1	0.738804	0	-0.11515	0.75142	-2.67612	0.007448	#ERROR!
RNF2	THAP9-AS1	0.775179	0	-0.0303	0.933773	-2.67607	0.007449	#ERROR!
HSF2	THAP9-AS1	0.749652	0	-0.09091	0.802772	-2.67565	0.007458	#ERROR!
RP2	THAP9-AS1	0.654703	0	-0.27273	0.445838	-2.67558	0.00746	#ERROR!
CHIC2	THAP9-AS1	0.69247	0	-0.20669	0.566695	-2.67332	0.00751	#ERROR!
HABP4	THAP9-AS1	0.702393	0	-0.18788	0.603218	-2.67269	0.007525	#ERROR!
DCUN1D1	THAP9-AS1	0.77452	0	-0.0303	0.933773	-2.67192	0.007542	#ERROR!
ARL8B	THAP9-AS1	0.743509	0	-0.10303	0.776998	-2.67152	0.007551	#ERROR!
PPIL3	THAP9-AS1	0.708398	0	-0.17576	0.627188	-2.67123	0.007557	#ERROR!
EIF1B	THAP9-AS1	0.743214	0	-0.10303	0.776998	-2.66986	0.007588	#ERROR!
MAMDC4	THAP9-AS1	0.208977	0.006892	0.854545	0.001637	2.66897	0.007608	#ERROR!
INTS12	THAP9-AS1	0.830095	0	0.127273	0.726057	-2.6685	0.007619	#ERROR!
ACTR6	THAP9-AS1	0.792648	0	0.018182	0.96024	-2.66813	0.007627	#ERROR!
ATF4	THAP9-AS1	0.719667	0	-0.15152	0.676065	-2.6664	0.007667	#ERROR!
CCT6P3	THAP9-AS1	0.805547	0	0.054545	0.881036	-2.66632	0.007669	#ERROR!
CLUAP1	THAP9-AS1	0.731276	0	-0.12727	0.726057	-2.66587	0.007679	#ERROR!
FBXO5	THAP9-AS1	0.71612	0	-0.15806	0.662762	-2.66484	0.007702	#ERROR!
REEP3	THAP9-AS1	0.707112	0	-0.17576	0.627188	-2.66474	0.007705	#ERROR!
GTF2F2	THAP9-AS1	0.731026	0	-0.12727	0.726057	-2.66451	0.00771	#ERROR!
HSPB11	THAP9-AS1	0.746984	0	-0.09091	0.802772	-2.6604	0.007805	#ERROR!
LY6K	THAP9-AS1	0.292963	0.000128	-0.6383	0.047024	-2.66001	0.007814	#ERROR!
FBXL3	THAP9-AS1	0.686356	0	-0.21212	0.556306	-2.6583	0.007854	#ERROR!
EIF4E3	THAP9-AS1	0.618891	0	-0.32121	0.365468	-2.65774	0.007867	#ERROR!
COMMD6	THAP9-AS1	0.650373	0	-0.27273	0.445838	-2.65661	0.007893	#ERROR!
ANO6	THAP9-AS1	0.70535	0	-0.17576	0.627188	-2.6559	0.00791	#ERROR!
HNRNPCP6	THAP9-AS1	0.35447	2.79e-06	-0.59457	0.069851	-2.65534	0.007923	#ERROR!
BUD31	THAP9-AS1	0.740521	0	-0.10303	0.776998	-2.65479	0.007936	#ERROR!
FAM153B	THAP9-AS1	0.426503	1.01e-08	-0.5366	0.109784	-2.65468	0.007938	#ERROR!
GMFB	THAP9-AS1	0.717301	0	-0.15152	0.676065	-2.6541	0.007952	#ERROR!
RBM7	THAP9-AS1	0.695068	0	-0.19453	0.590207	-2.65405	0.007953	#ERROR!
AKTIP	THAP9-AS1	0.72321	0	-0.13939	0.700932	-2.65383	0.007958	#ERROR!
DEFB131B	THAP9-AS1	0.58657	0	-0.36426	0.300756	-2.65273	0.007984	#ERROR!
ARL4D	THAP9-AS1	0.499189	7.61e-12	-0.46667	0.173939	-2.65226	0.007995	#ERROR!
RNU6-529P	THAP9-AS1	0.629179	0	-0.30395	0.393201	-2.65201	0.008001	#ERROR!
MRPL32	THAP9-AS1	0.739849	0	-0.10303	0.776998	-2.65105	0.008024	#ERROR!
RBM48	THAP9-AS1	0.766178	0	-0.04242	0.907364	-2.65083	0.008029	#ERROR!
ATP2B4	THAP9-AS1	0.677762	0	-0.22424	0.533401	-2.64989	0.008052	#ERROR!
ADH5	THAP9-AS1	0.704141	0	-0.17576	0.627188	-2.64985	0.008053	#ERROR!
MIR497HG	THAP9-AS1	0.625101	0	-0.30909	0.384841	-2.64937	0.008064	#ERROR!
ANKAR	THAP9-AS1	0.775664	0	-0.01818	0.96024	-2.64861	0.008082	#ERROR!
ACSL4	THAP9-AS1	0.648028	0	-0.27273	0.445838	-2.64641	0.008135	#ERROR!
CCNT2	THAP9-AS1	0.802645	0	0.054545	0.881036	-2.64566	0.008153	#ERROR!
MT1X	THAP9-AS1	0.624181	0	-0.30909	0.384841	-2.64557	0.008155	#ERROR!
MCEE	THAP9-AS1	0.793695	0	0.030303	0.933773	-2.64472	0.008176	#ERROR!
MEAF6	THAP9-AS1	0.779587	0	-0.00606	0.986743	-2.64308	0.008216	#ERROR!
H3-3A	THAP9-AS1	0.754237	0	-0.06667	0.854813	-2.64082	0.008271	#ERROR!
NCK1	THAP9-AS1	0.732263	0	-0.11515	0.75142	-2.64026	0.008284	#ERROR!
AHSP	THAP9-AS1	0.159082	0.040638	-0.71059	0.021266	-2.63915	0.008311	#ERROR!
LINC00313	THAP9-AS1	0.117054	0.133123	-0.73113	0.016282	-2.63895	0.008316	0/-
BNIP2	THAP9-AS1	0.748572	0	-0.07879	0.828717	-2.63874	0.008322	#ERROR!
BLOC1S6	THAP9-AS1	0.720252	0	-0.13939	0.700932	-2.6383	0.008332	#ERROR!
MPI	THAP9-AS1	0.530009	2.09e-13	0.927273	0.000112	2.63814	0.008336	#ERROR!
PNPLA8	THAP9-AS1	0.707776	0	-0.16364	0.651477	-2.63669	0.008372	#ERROR!
NEK2	THAP9-AS1	0.731499	0	-0.11515	0.75142	-2.63612	0.008386	#ERROR!
BCCIP	THAP9-AS1	0.801141	0	0.054545	0.881036	-2.63507	0.008412	#ERROR!
DTWD1	THAP9-AS1	0.747477	0	-0.07879	0.828717	-2.63248	0.008476	#ERROR!
MBIP	THAP9-AS1	0.706872	0	-0.16364	0.651477	-2.63213	0.008485	#ERROR!
PIGC	THAP9-AS1	0.719007	0	-0.13939	0.700932	-2.6318	0.008493	#ERROR!
RPL21P39	THAP9-AS1	0.490271	2.02e-11	-0.46952	0.170966	-2.63175	0.008495	#ERROR!
FER	THAP9-AS1	0.676716	0	-0.21885	0.543551	-2.63074	0.00852	#ERROR!
LSM3	THAP9-AS1	0.69381	0	-0.18788	0.603218	-2.63057	0.008524	#ERROR!
CREM	THAP9-AS1	0.659239	0	-0.24848	0.488776	-2.63022	0.008533	#ERROR!
PPT1	THAP9-AS1	0.687101	0	-0.2	0.579584	-2.63	0.008539	#ERROR!
RPL31	THAP9-AS1	0.706306	0	-0.16364	0.651477	-2.62929	0.008556	#ERROR!
EIF4A1P6	THAP9-AS1	-0.13288	0.087888	0.721284	0.018556	2.62699	0.008614	0/+
ARPP19	THAP9-AS1	0.729742	0	-0.11515	0.75142	-2.62663	0.008623	#ERROR!
KCNAB1	THAP9-AS1	0.73242	0	-0.10942	0.763483	-2.62651	0.008627	#ERROR!
LINC00641	THAP9-AS1	0.711627	0	-0.15152	0.676065	-2.62493	0.008667	#ERROR!
DCTN6	THAP9-AS1	0.711073	0	-0.15152	0.676065	-2.62211	0.008739	#ERROR!
GLIS3-AS1	THAP9-AS1	0.129718	0.09577	-0.72175	0.018443	-2.62135	0.008758	0/-
CAPZA1	THAP9-AS1	0.771299	0	-0.01818	0.96024	-2.62128	0.00876	#ERROR!
DNTTIP2	THAP9-AS1	0.820012	0	0.115152	0.75142	-2.61996	0.008794	#ERROR!
HSPA14	THAP9-AS1	0.73413	0	-0.10303	0.776998	-2.61954	0.008805	#ERROR!
IMMP1L	THAP9-AS1	0.775757	0	-0.00606	0.986743	-2.6187	0.008827	#ERROR!
LINC02371	THAP9-AS1	0.355961	2.52e-06	-0.58387	0.076359	-2.61841	0.008834	#ERROR!
MRPL1	THAP9-AS1	0.765737	0	-0.0303	0.933773	-2.61761	0.008855	#ERROR!
RPS10	THAP9-AS1	0.641319	0	-0.27273	0.445838	-2.61752	0.008857	#ERROR!
APOC1	THAP9-AS1	0.476616	8.52e-11	-0.47879	0.161523	-2.61699	0.008871	#ERROR!
ARRDC4	THAP9-AS1	0.670542	0	-0.22424	0.533401	-2.61658	0.008881	#ERROR!
LOC152845	THAP9-AS1	-0.05245	0.502153	-0.79772	0.005692	-2.61653	0.008883	0/-
EEF1A1P10	THAP9-AS1	0.576419	4.44e-16	-0.36474	0.300067	-2.61553	0.008909	#ERROR!
PRPF39	THAP9-AS1	0.852997	0	0.224242	0.533401	-2.61429	0.008941	#ERROR!
FZD6	THAP9-AS1	0.769975	0	-0.01818	0.96024	-2.61307	0.008973	#ERROR!
CD302	THAP9-AS1	0.662378	0	-0.23636	0.510885	-2.61183	0.009006	#ERROR!
RPL5	THAP9-AS1	0.732631	0	-0.10303	0.776998	-2.61138	0.009018	#ERROR!
POLR3F	THAP9-AS1	0.63986	0	-0.27273	0.445838	-2.6113	0.00902	#ERROR!
FBXO3	THAP9-AS1	0.748861	0	-0.06687	0.854375	-2.61024	0.009048	#ERROR!
NDUFA7	THAP9-AS1	0.720821	0	-0.12727	0.726057	-2.61022	0.009048	#ERROR!
FILIP1	THAP9-AS1	0.661981	0	-0.23636	0.510885	-2.61005	0.009053	#ERROR!
OXR1	THAP9-AS1	0.74318	0	-0.07879	0.828717	-2.60816	0.009103	#ERROR!
RPL35P1	THAP9-AS1	0.74313	0	-0.07879	0.828717	-2.60787	0.009111	#ERROR!
CAMKV	THAP9-AS1	0.280498	0.000252	-0.63392	0.049046	-2.60732	0.009125	#ERROR!
COL6A4P1	THAP9-AS1	0.712276	0	-0.14336	0.692769	-2.60726	0.009127	#ERROR!
LINC-PINT	THAP9-AS1	0.682161	0	-0.2	0.579584	-2.6066	0.009145	#ERROR!
FAM160B1	THAP9-AS1	0.748304	0	-0.06667	0.854813	-2.60654	0.009146	#ERROR!
CISD1	THAP9-AS1	0.707475	0	-0.15152	0.676065	-2.60389	0.009217	#ERROR!
MYCBP2-AS1	THAP9-AS1	0.576101	4.44e-16	-0.36111	0.305264	-2.60382	0.009219	#ERROR!
AIDA	THAP9-AS1	0.747796	0	-0.06667	0.854813	-2.60364	0.009224	#ERROR!
DHFR	THAP9-AS1	0.713439	0	-0.13939	0.700932	-2.60303	0.00924	#ERROR!
DIXDC1	THAP9-AS1	0.713324	0	-0.13939	0.700932	-2.60244	0.009256	#ERROR!
ATG14	THAP9-AS1	0.805157	0	0.078788	0.828717	-2.60225	0.009261	#ERROR!
DIABLO	THAP9-AS1	0.742115	0	-0.07879	0.828717	-2.60218	0.009263	#ERROR!
LOC728877	THAP9-AS1	0.33578	9.75e-06	-0.59404	0.070163	-2.5999	0.009325	#ERROR!
CRIPT	THAP9-AS1	0.712235	0	-0.13939	0.700932	-2.59687	0.009408	#ERROR!
BRIX1	THAP9-AS1	0.800055	0	0.066667	0.854813	-2.59684	0.009409	#ERROR!
CCDC127	THAP9-AS1	0.74104	0	-0.07879	0.828717	-2.59617	0.009427	#ERROR!
C1orf54	THAP9-AS1	0.619691	0	-0.29697	0.404702	-2.59356	0.009499	#ERROR!
CETN3	THAP9-AS1	0.766759	0	-0.01818	0.96024	-2.59331	0.009506	#ERROR!
FPGT	THAP9-AS1	0.729058	0	-0.10303	0.776998	-2.59209	0.00954	#ERROR!
RPL24	THAP9-AS1	0.705057	0	-0.15152	0.676065	-2.59175	0.009549	#ERROR!
GTPBP8	THAP9-AS1	0.737243	0	-0.08511	0.815172	-2.59112	0.009566	#ERROR!
C17orf113	THAP9-AS1	0.282018	0.000232	0.866667	0.001174	2.59094	0.009571	#ERROR!
PRKAG1	THAP9-AS1	0.722866	0	-0.11515	0.75142	-2.59001	0.009597	#ERROR!
LY6G6D	THAP9-AS1	0.346297	4.87e-06	-0.58359	0.076538	-2.58959	0.009609	#ERROR!
MBNL2	THAP9-AS1	0.73417	0	-0.09091	0.802772	-2.58897	0.009626	#ERROR!
PARK7	THAP9-AS1	0.745197	0	-0.06667	0.854813	-2.58887	0.009629	#ERROR!
CDC42	THAP9-AS1	0.728384	0	-0.10303	0.776998	-2.58847	0.00964	#ERROR!
COMMD8	THAP9-AS1	0.691507	0	-0.17576	0.627188	-2.58788	0.009657	#ERROR!
LINC01474	THAP9-AS1	0.409532	4.28e-08	-0.53213	0.11335	-2.58719	0.009676	#ERROR!
GABARAPL2	THAP9-AS1	0.704075	0	-0.15152	0.676065	-2.58684	0.009686	#ERROR!
BBS4	THAP9-AS1	0.634052	0	-0.27273	0.445838	-2.5867	0.00969	#ERROR!
PHF5A	THAP9-AS1	0.601024	0	-0.32121	0.365468	-2.58614	0.009706	#ERROR!
PRKD3	THAP9-AS1	0.733463	0	-0.09091	0.802772	-2.58512	0.009734	#ERROR!
RPL13P7	THAP9-AS1	-0.25366	0.000975	0.645777	0.043703	2.58511	0.009735	-/+
NDUFAF2P1	THAP9-AS1	0.672982	0	-0.20796	0.564256	-2.58479	0.009744	#ERROR!
GAPLINC	THAP9-AS1	0.478602	6.94e-11	-0.46667	0.173939	-2.58418	0.009761	#ERROR!
CFL2	THAP9-AS1	0.617359	0	-0.29697	0.404702	-2.58405	0.009765	#ERROR!
LINC01806	THAP9-AS1	0.617166	0	-0.29697	0.404702	-2.58327	0.009787	#ERROR!
LINC02712	THAP9-AS1	0.311753	4.34e-05	-0.60678	0.062874	-2.58248	0.009809	#ERROR!
PSMB1	THAP9-AS1	0.662726	0	-0.22424	0.533401	-2.58118	0.009846	#ERROR!
RPL7AP14	THAP9-AS1	0.381495	3.95e-07	-0.55385	0.096687	-2.58107	0.00985	#ERROR!
PPIAP75	THAP9-AS1	0.363018	1.53e-06	-0.56854	0.086361	-2.58102	0.009851	#ERROR!
C8orf76	THAP9-AS1	0.774476	0	0.006061	0.986743	-2.58012	0.009877	#ERROR!
CYP2D7	THAP9-AS1	0.1042	0.181543	0.810991	0.004414	2.58007	0.009878	0/+
HIGD1A	THAP9-AS1	0.715013	0	-0.12727	0.726057	-2.58006	0.009878	#ERROR!
MORF4L1	THAP9-AS1	0.676465	0	-0.2	0.579584	-2.57998	0.009881	#ERROR!
LOC101929140	THAP9-AS1	0.639621	0	-0.2614	0.465685	-2.57958	0.009892	#ERROR!
MPHOSPH6	THAP9-AS1	0.743522	0	-0.06667	0.854813	-2.57942	0.009897	#ERROR!
LINC00888	THAP9-AS1	0.576068	4.44e-16	-0.35259	0.317662	-2.5791	0.009906	#ERROR!
CENPK	THAP9-AS1	0.732049	0	-0.09091	0.802772	-2.57744	0.009954	#ERROR!
IDNK	THAP9-AS1	0.689316	0	-0.17576	0.627188	-2.57735	0.009956	#ERROR!
CLEC2B	THAP9-AS1	0.571553	8.88e-16	-0.35758	0.310376	-2.57653	0.00998	#ERROR!
HSCB	THAP9-AS1	0.668725	0	-0.21212	0.556306	-2.57627	0.009987	#ERROR!
HMGB1	THAP9-AS1	0.737291	0	-0.07879	0.828717	-2.57537	0.010013	#ERROR!
METTL8	THAP9-AS1	0.783253	0	0.030303	0.933773	-2.57525	0.010017	#ERROR!
RPL17P22	THAP9-AS1	0.327566	1.65e-05	-0.5933	0.070604	-2.57379	0.010059	#ERROR!
ART5	THAP9-AS1	0.324152	2.04e-05	-0.59575	0.069156	-2.57371	0.010061	#ERROR!
KLHDC1	THAP9-AS1	0.67511	0	-0.2	0.579584	-2.5737	0.010062	#ERROR!
DCAF13	THAP9-AS1	0.787628	0	0.042424	0.907364	-2.57345	0.010069	#ERROR!
PRTFDC1	THAP9-AS1	0.597674	0	-0.32121	0.365468	-2.57298	0.010083	#ERROR!
LOC100419515	THAP9-AS1	0.736073	0	-0.08001	0.826095	-2.57177	0.010118	#ERROR!
AMH	THAP9-AS1	0.100494	0.197655	0.808514	0.004635	2.5714	0.010129	0/+
AIMP1	THAP9-AS1	0.837217	0	0.187879	0.603218	-2.57082	0.010146	#ERROR!
MORN5	THAP9-AS1	0.333791	1.11e-05	-0.58788	0.073878	-2.57044	0.010157	#ERROR!
PIP4P2	THAP9-AS1	0.653028	0	-0.23636	0.510885	-2.57037	0.010159	#ERROR!
NEPRO	THAP9-AS1	0.791632	0	0.054545	0.881036	-2.56963	0.010181	#ERROR!
ABI2	THAP9-AS1	0.736139	0	-0.07879	0.828717	-2.56903	0.010198	#ERROR!
DNAJB6P1	THAP9-AS1	0.730487	0	-0.09091	0.802772	-2.56899	0.0102	#ERROR!
POT1	THAP9-AS1	0.687148	0	-0.17576	0.627188	-2.56698	0.010259	#ERROR!
ISM2	THAP9-AS1	0.295673	0.00011	-0.61398	0.058981	-2.5668	0.010264	#ERROR!
GTPBP10	THAP9-AS1	0.751819	0	-0.04242	0.907364	-2.56558	0.0103	#ERROR!
HSPBAP1	THAP9-AS1	0.84033	0	0.2	0.579584	-2.56554	0.010302	#ERROR!
PRANCR	THAP9-AS1	0.746295	0	-0.05488	0.880313	-2.56532	0.010308	#ERROR!
CCSER2	THAP9-AS1	0.75175	0	-0.04242	0.907364	-2.56517	0.010312	#ERROR!
CUTC	THAP9-AS1	0.751563	0	-0.04242	0.907364	-2.5641	0.010344	#ERROR!
FAM133B	THAP9-AS1	0.761843	0	-0.01818	0.96024	-2.56357	0.01036	#ERROR!
DEK	THAP9-AS1	0.745981	0	-0.05455	0.881036	-2.56269	0.010386	#ERROR!
POMP	THAP9-AS1	0.679514	0	-0.18788	0.603218	-2.56249	0.010393	#ERROR!
ANAPC13	THAP9-AS1	0.761561	0	-0.01818	0.96024	-2.56187	0.010411	#ERROR!
CYP4B1	THAP9-AS1	0.330728	1.35e-05	-0.58788	0.073878	-2.56177	0.010414	#ERROR!
RHOT1	THAP9-AS1	0.723289	0	-0.10303	0.776998	-2.56137	0.010426	#ERROR!
RNU6-46P	THAP9-AS1	0.304105	6.8e-05	-0.60678	0.062874	-2.56122	0.01043	#ERROR!
CRLF3	THAP9-AS1	0.745599	0	-0.05471	0.880676	-2.56095	0.010439	#ERROR!
GP6	THAP9-AS1	0.35995	1.91e-06	0.884163	0.000683	2.56085	0.010442	#ERROR!
GNL3	THAP9-AS1	0.82438	0	0.151515	0.676065	-2.56072	0.010445	#ERROR!
GGPS1	THAP9-AS1	0.756039	0	-0.0303	0.933773	-2.55964	0.010478	#ERROR!
HMGB2	THAP9-AS1	0.807779	0	0.10303	0.776998	-2.55962	0.010479	#ERROR!
MXRA7	THAP9-AS1	0.557262	6.22e-15	-0.3697	0.29305	-2.55891	0.0105	#ERROR!
NBEAP2	THAP9-AS1	0.684856	0	-0.17683	0.625049	-2.55888	0.010501	#ERROR!
LOC100128108	THAP9-AS1	0.50951	2.38e-12	-0.42553	0.220179	-2.55783	0.010533	#ERROR!
MRPL46	THAP9-AS1	0.66453	0	-0.21212	0.556306	-2.55727	0.01055	#ERROR!
PSMC2P1	THAP9-AS1	0.628113	0	-0.2708	0.449185	-2.55663	0.010569	#ERROR!
LMO4	THAP9-AS1	0.584268	0	-0.33333	0.346594	-2.5553	0.01061	#ERROR!
MAGOHB	THAP9-AS1	0.703709	0	-0.13939	0.700932	-2.55385	0.010654	#ERROR!
RO60	THAP9-AS1	0.733214	0	-0.07879	0.828717	-2.55304	0.010679	#ERROR!
FAM228B	THAP9-AS1	0.706398	0	-0.13374	0.712622	-2.55281	0.010686	#ERROR!
CSGALNACT2	THAP9-AS1	0.690547	0	-0.16364	0.651477	-2.55185	0.010715	#ERROR!
CDC42EP3	THAP9-AS1	0.696767	0	-0.15152	0.676065	-2.55074	0.010749	#ERROR!
GTF2B	THAP9-AS1	0.774505	0	0.018182	0.96024	-2.5498	0.010779	#ERROR!
RPL21P27	THAP9-AS1	0.145769	0.06094	-0.69914	0.024457	-2.54759	0.010847	0/-
ERH	THAP9-AS1	0.702413	0	-0.13939	0.700932	-2.54741	0.010853	#ERROR!
MIR5692A1	THAP9-AS1	0.407489	5.07e-08	-0.52223	0.121503	-2.54652	0.01088	#ERROR!
DBF4	THAP9-AS1	0.758915	0	-0.01818	0.96024	-2.5461	0.010893	#ERROR!
MIR548AA1	THAP9-AS1	0.489672	2.15e-11	-0.44305	0.199716	-2.54561	0.010909	#ERROR!
MIR93	THAP9-AS1	0.336751	9.16e-06	-0.57903	0.079433	-2.54506	0.010926	#ERROR!
IL6ST	THAP9-AS1	0.7201	0	-0.10303	0.776998	-2.54462	0.01094	#ERROR!
CAV2	THAP9-AS1	0.599032	0	-0.30909	0.384841	-2.54444	0.010945	#ERROR!
NRN1L	THAP9-AS1	0.29413	0.00012	-0.60927	0.061509	-2.5436	0.010972	#ERROR!
ENOPH1	THAP9-AS1	0.783042	0	0.042424	0.907364	-2.54333	0.01098	#ERROR!
RAD51AP1	THAP9-AS1	0.704315	0	-0.13374	0.712622	-2.54238	0.01101	#ERROR!
ADAM21	THAP9-AS1	0.342218	6.4e-06	-0.57417	0.082593	-2.54231	0.011012	#ERROR!
CGRRF1	THAP9-AS1	0.660932	0	-0.21212	0.556306	-2.54113	0.01105	#ERROR!
ATG5	THAP9-AS1	0.725193	0	-0.09091	0.802772	-2.54066	0.011064	#ERROR!
ELOVL2	THAP9-AS1	0.530123	2.06e-13	-0.39635	0.256831	-2.54054	0.011068	#ERROR!
C1orf43	THAP9-AS1	0.725023	0	-0.09091	0.802772	-2.53976	0.011093	#ERROR!
POU1F1	THAP9-AS1	0.44923	1.27e-09	-0.48156	0.158757	-2.53834	0.011138	#ERROR!
RPL31P51	THAP9-AS1	0.147193	0.058433	-0.69631	0.025293	-2.53739	0.011168	0/-
C3orf38	THAP9-AS1	0.718633	0	-0.10303	0.776998	-2.53698	0.011181	#ERROR!
CLUHP3	THAP9-AS1	0.685493	0	0.951515	2.28e-05	2.53683	0.011186	#ERROR!
FAM217B	THAP9-AS1	0.652631	0	-0.22424	0.533401	-2.53641	0.011199	#ERROR!
LRCH2	THAP9-AS1	0.605493	0	-0.29697	0.404702	-2.53637	0.011201	#ERROR!
PJVK	THAP9-AS1	0.726812	0	-0.08511	0.815172	-2.53456	0.011259	#ERROR!
MLLT11	THAP9-AS1	0.680244	0	-0.17576	0.627188	-2.53436	0.011265	#ERROR!
NAB1	THAP9-AS1	0.756914	0	-0.01818	0.96024	-2.53427	0.011268	#ERROR!
NUF2	THAP9-AS1	0.7352	0	-0.06687	0.854375	-2.53373	0.011286	#ERROR!
KATNAL1	THAP9-AS1	0.693059	0	-0.15152	0.676065	-2.53269	0.011319	#ERROR!
MIR202HG	THAP9-AS1	0.269426	0.000448	-0.62309	0.054295	-2.53211	0.011338	#ERROR!
NPM1	THAP9-AS1	0.723491	0	-0.09091	0.802772	-2.53165	0.011353	#ERROR!
AADACP1	THAP9-AS1	0.559159	4.88e-15	-0.35758	0.310376	-2.53069	0.011384	#ERROR!
CLIC2	THAP9-AS1	0.620548	0	-0.27273	0.445838	-2.53067	0.011385	#ERROR!
DPM1	THAP9-AS1	0.685936	0	-0.16364	0.651477	-2.52981	0.011413	#ERROR!
LEPR	THAP9-AS1	0.643378	0	-0.23636	0.510885	-2.52848	0.011456	#ERROR!
C1orf198	THAP9-AS1	0.698544	0	-0.13939	0.700932	-2.52829	0.011462	#ERROR!
HIKESHI	THAP9-AS1	0.692075	0	-0.15152	0.676065	-2.52794	0.011473	#ERROR!
NAE1	THAP9-AS1	0.76098	0	-0.00606	0.986743	-2.52789	0.011475	#ERROR!
CCDC50	THAP9-AS1	0.750408	0	-0.0303	0.933773	-2.52689	0.011508	#ERROR!
HOOK3	THAP9-AS1	0.744879	0	-0.04242	0.907364	-2.52588	0.011541	#ERROR!
ATP5MD	THAP9-AS1	0.716446	0	-0.10303	0.776998	-2.52563	0.011549	#ERROR!
MAP4K3	THAP9-AS1	0.749917	0	-0.0303	0.933773	-2.52406	0.011601	#ERROR!
HOXB8	THAP9-AS1	0.352133	3.28e-06	0.878788	0.000814	2.52272	0.011645	#ERROR!
DHX40P1	THAP9-AS1	0.485024	3.54e-11	-0.44057	0.202545	-2.52252	0.011652	#ERROR!
CBY1	THAP9-AS1	0.76003	0	-0.00606	0.986743	-2.52222	0.011662	#ERROR!
RPL5P33	THAP9-AS1	0.225138	0.003542	-0.64873	0.042436	-2.52176	0.011677	#ERROR!
CRISP3	THAP9-AS1	0.159413	0.040217	-0.68649	0.028348	-2.52154	0.011684	#ERROR!
AP1S2	THAP9-AS1	0.65628	0	-0.21212	0.556306	-2.52045	0.011721	#ERROR!
ARL16	THAP9-AS1	0.670359	0	-0.18788	0.603218	-2.52017	0.01173	#ERROR!
KLK13	THAP9-AS1	0.232575	0.002567	0.844989	0.002086	2.51998	0.011736	#ERROR!
GLO1	THAP9-AS1	0.714898	0	-0.10303	0.776998	-2.51764	0.011814	#ERROR!
OGFRL1	THAP9-AS1	0.600617	0	-0.29697	0.404702	-2.51708	0.011833	#ERROR!
IGHVIII-67-2	THAP9-AS1	0.040268	0.606476	0.778119	0.008033	2.51706	0.011834	0/+
PIK3R1	THAP9-AS1	0.695883	0	-0.13939	0.700932	-2.51526	0.011894	#ERROR!
CELF6	THAP9-AS1	0.319052	2.79e-05	-0.58431	0.076089	-2.51523	0.011895	#ERROR!
OPN1SW	THAP9-AS1	0.720367	0	-0.09091	0.802772	-2.51523	0.011896	#ERROR!
LINC01635	THAP9-AS1	0.298005	9.64e-05	-0.59941	0.067025	-2.51521	0.011896	#ERROR!
NEDD1	THAP9-AS1	0.742958	0	-0.04242	0.907364	-2.51506	0.011901	#ERROR!
CCNB1IP1	THAP9-AS1	0.714297	0	-0.10303	0.776998	-2.51456	0.011918	#ERROR!
CSRP1	THAP9-AS1	0.608379	0	-0.28485	0.425038	-2.51454	0.011919	#ERROR!
DRG1	THAP9-AS1	0.669072	0	-0.18788	0.603218	-2.5143	0.011927	#ERROR!
AMBN	THAP9-AS1	0.111607	0.152267	0.804449	0.005015	2.51385	0.011942	0/+
RNU6-1048P	THAP9-AS1	0.602478	0	-0.29295	0.411393	-2.51334	0.011959	#ERROR!
CXCL11	THAP9-AS1	0.404492	6.48e-08	-0.51515	0.127553	-2.51311	0.011967	#ERROR!
GSTO1	THAP9-AS1	0.632097	0	-0.24848	0.488776	-2.51304	0.011969	#ERROR!
AKAP11	THAP9-AS1	0.731453	0	-0.06667	0.854813	-2.51282	0.011977	#ERROR!
MAL2	THAP9-AS1	0.783026	0	0.054545	0.881036	-2.51266	0.011983	#ERROR!
C1orf174	THAP9-AS1	0.763493	0	0.006061	0.986743	-2.51248	0.011988	#ERROR!
IL15	THAP9-AS1	0.598926	0	-0.29697	0.404702	-2.51044	0.012058	#ERROR!
APOC1P1	THAP9-AS1	0.220926	0.004232	-0.64826	0.042636	-2.50857	0.012122	#ERROR!
PRPS1L1	THAP9-AS1	-0.28129	0.000241	0.609272	0.061509	2.50838	0.012129	-/0
CKS2	THAP9-AS1	0.630812	0	-0.24848	0.488776	-2.50766	0.012153	#ERROR!
ACCSL	THAP9-AS1	0.153699	0.048033	-0.68661	0.028311	-2.50735	0.012164	#ERROR!
GLRX2	THAP9-AS1	0.724368	0	-0.07879	0.828717	-2.50556	0.012226	#ERROR!
RN7SKP287	THAP9-AS1	0.463816	3.11e-10	-0.45696	0.18428	-2.5053	0.012235	#ERROR!
LOC102724684	THAP9-AS1	0.659299	0	-0.20075	0.57814	-2.50395	0.012282	#ERROR!
BARD1	THAP9-AS1	0.740951	0	-0.04242	0.907364	-2.50382	0.012286	#ERROR!
C12orf73	THAP9-AS1	0.74085	0	-0.04242	0.907364	-2.50326	0.012306	#ERROR!
FRA10AC1	THAP9-AS1	0.804181	0	0.115152	0.75142	-2.50291	0.012318	#ERROR!
IQCC	THAP9-AS1	0.766927	0	0.018182	0.96024	-2.50283	0.012321	#ERROR!
DMD	THAP9-AS1	0.596982	0	-0.29697	0.404702	-2.50282	0.012321	#ERROR!
CASP3	THAP9-AS1	0.804088	0	0.115152	0.75142	-2.50225	0.012341	#ERROR!
RPL9	THAP9-AS1	0.560851	4e-15	-0.34545	0.328227	-2.50209	0.012346	#ERROR!
CLDN9	THAP9-AS1	0.155676	0.045197	0.818182	0.003815	2.50208	0.012347	#ERROR!
NDUFA4	THAP9-AS1	0.637059	0	-0.23636	0.510885	-2.50154	0.012365	#ERROR!
PGBD1	THAP9-AS1	0.659155	0	-0.2	0.579584	-2.50135	0.012372	#ERROR!
ADPRM	THAP9-AS1	0.679756	0	-0.16364	0.651477	-2.50067	0.012396	#ERROR!
CEBPZOS	THAP9-AS1	0.756203	0	-0.00606	0.986743	-2.49958	0.012434	#ERROR!
PTGES3P4	THAP9-AS1	-0.33932	7.74e-06	0.564412	0.089186	2.49771	0.0125	-/0
PDZD9	THAP9-AS1	0.610486	0	-0.27524	0.441487	-2.49674	0.012534	#ERROR!
AIG1	THAP9-AS1	0.678802	0	-0.16364	0.651477	-2.49621	0.012553	#ERROR!
DDX55	THAP9-AS1	0.807474	0	0.127273	0.726057	-2.49558	0.012575	#ERROR!
LINC00216	THAP9-AS1	0.680334	0	-0.16052	0.657768	-2.49533	0.012584	#ERROR!
RPL11P3	THAP9-AS1	-0.50699	3.17e-12	0.407766	0.242115	2.49518	0.012589	-/0
FAM13B	THAP9-AS1	0.7104	0	-0.10303	0.776998	-2.49465	0.012608	#ERROR!
RPL17	THAP9-AS1	0.627415	0	-0.24848	0.488776	-2.49352	0.012648	#ERROR!
NAP1L1	THAP9-AS1	0.733459	0	-0.05455	0.881036	-2.4931	0.012663	#ERROR!
C18orf21	THAP9-AS1	0.697627	0	-0.12727	0.726057	-2.49274	0.012676	#ERROR!
PFDN5	THAP9-AS1	0.611079	0	-0.27273	0.445838	-2.49229	0.012692	#ERROR!
KLHL7	THAP9-AS1	0.691038	0	-0.13939	0.700932	-2.49178	0.012711	#ERROR!
DCBLD2	THAP9-AS1	0.649677	0	-0.21212	0.556306	-2.49148	0.012721	#ERROR!
COA6	THAP9-AS1	0.733016	0	-0.05455	0.881036	-2.49069	0.01275	#ERROR!
LOC100422398	THAP9-AS1	0.420638	1.68e-08	-0.49399	0.146725	-2.49063	0.012752	#ERROR!
OGA	THAP9-AS1	0.811003	0	0.139394	0.700932	-2.49026	0.012765	#ERROR!
MAP3K20	THAP9-AS1	0.690539	0	-0.13939	0.700932	-2.48938	0.012797	#ERROR!
NUDCD2	THAP9-AS1	0.709284	0	-0.10303	0.776998	-2.48898	0.012811	#ERROR!
NEGR1	THAP9-AS1	0.56653	1.78e-15	-0.33333	0.346594	-2.48857	0.012826	#ERROR!
KIAA1143	THAP9-AS1	0.743584	0	-0.0303	0.933773	-2.48804	0.012845	#ERROR!
DDX50	THAP9-AS1	0.759398	0	0.006061	0.986743	-2.48796	0.012848	#ERROR!
MFSD8	THAP9-AS1	0.834896	0	0.212121	0.556306	-2.48786	0.012851	#ERROR!
CDADC1	THAP9-AS1	0.76195	0	0.012158	0.973408	-2.48785	0.012852	#ERROR!
ALG13	THAP9-AS1	0.720948	0	-0.07879	0.828717	-2.48755	0.012863	#ERROR!
ABCE1	THAP9-AS1	0.818802	0	0.163636	0.651477	-2.48625	0.01291	#ERROR!
CALM2	THAP9-AS1	0.708736	0	-0.10303	0.776998	-2.48622	0.012911	#ERROR!
LINC00476	THAP9-AS1	0.683139	0	-0.15152	0.676065	-2.48528	0.012945	#ERROR!
MED21	THAP9-AS1	0.720225	0	-0.07879	0.828717	-2.48377	0.013	#ERROR!
CPB2	THAP9-AS1	0.351642	3.39e-06	0.875076	0.000914	2.48369	0.013003	#ERROR!
RPL18P11	THAP9-AS1	-0.40926	4.38e-08	0.502157	0.139131	2.48338	0.013014	-/0
DTX2P1-UPK3BP1-PMS2P11	THAP9-AS1	0.679435	0	0.948333	2.93e-05	2.48332	0.013016	#ERROR!
EIF3KP3	THAP9-AS1	-0.59619	0	0.290129	0.41612	2.4809	0.013105	-/0
OR10Q1	THAP9-AS1	0.028869	0.711966	0.767682	0.009524	2.48054	0.013118	0/+
CKLF	THAP9-AS1	0.71313	0	-0.09091	0.802772	-2.47778	0.01322	#ERROR!
COPS3	THAP9-AS1	0.631262	0	-0.23636	0.510885	-2.47714	0.013244	#ERROR!
RPL10P6	THAP9-AS1	-0.39018	2.03e-07	0.516984	0.12597	2.47662	0.013263	-/0
PRMT9	THAP9-AS1	0.813234	0	0.151515	0.676065	-2.47559	0.013302	#ERROR!
COQ10B	THAP9-AS1	0.730158	0	-0.05455	0.881036	-2.47521	0.013316	#ERROR!
BCAP29	THAP9-AS1	0.694003	0	-0.12727	0.726057	-2.47506	0.013321	#ERROR!
RNU2-27P	THAP9-AS1	0.656426	0	-0.19453	0.590207	-2.47492	0.013327	#ERROR!
CCDC160	THAP9-AS1	0.358562	2.1e-06	-0.54269	0.10504	-2.47404	0.013359	#ERROR!
RNF227	THAP9-AS1	0.743762	0	-0.02432	0.94684	-2.47396	0.013362	#ERROR!
KIZ	THAP9-AS1	0.652916	0	-0.2	0.579584	-2.47378	0.013369	#ERROR!
PEX19	THAP9-AS1	0.706094	0	-0.10303	0.776998	-2.4729	0.013402	#ERROR!
PTPN14	THAP9-AS1	0.693553	0	-0.12727	0.726057	-2.47287	0.013403	#ERROR!
CYB5A	THAP9-AS1	0.60609	0	-0.27273	0.445838	-2.47234	0.013423	#ERROR!
ATF1	THAP9-AS1	0.723743	0	-0.06687	0.854375	-2.47211	0.013432	#ERROR!
LOC100133286	THAP9-AS1	0.490715	1.92e-11	0.908553	0.000274	2.47146	0.013456	#ERROR!
LOC442087	THAP9-AS1	-0.46612	2.47e-10	0.443867	0.198785	2.47137	0.01346	-/0
MRPL47	THAP9-AS1	0.761671	0	0.018182	0.96024	-2.47102	0.013473	#ERROR!
RPL31P48	THAP9-AS1	0.181187	0.019483	-0.66332	0.036534	-2.47087	0.013479	#ERROR!
DDIT3	THAP9-AS1	0.729343	0	-0.05455	0.881036	-2.47083	0.01348	#ERROR!
KLF11	THAP9-AS1	0.71768	0	-0.07879	0.828717	-2.47051	0.013492	#ERROR!
FBXO30-DT	THAP9-AS1	0.637332	0	-0.22424	0.533401	-2.47049	0.013493	#ERROR!
LYRM7	THAP9-AS1	0.723351	0	-0.06667	0.854813	-2.46952	0.013529	#ERROR!
PEX3	THAP9-AS1	0.67972	0	-0.15152	0.676065	-2.46922	0.013541	#ERROR!
LSM1	THAP9-AS1	0.750896	0	-0.00606	0.986743	-2.46868	0.013561	#ERROR!
ELOVL5	THAP9-AS1	0.629173	0	-0.23636	0.510885	-2.46842	0.013571	#ERROR!
PPIAP58	THAP9-AS1	0.591056	0	-0.29269	0.411831	-2.46798	0.013588	#ERROR!
EID1	THAP9-AS1	0.621064	0	-0.24848	0.488776	-2.46733	0.013612	#ERROR!
RHPN1	THAP9-AS1	0.244173	0.001523	0.842424	0.00222	2.46664	0.013639	#ERROR!
GPATCH2	THAP9-AS1	0.803314	0	0.127273	0.726057	-2.46579	0.013671	#ERROR!
DYNLT1	THAP9-AS1	0.636051	0	-0.22424	0.533401	-2.46507	0.013699	#ERROR!
EIF4BP2	THAP9-AS1	0.463398	3.24e-10	-0.44452	0.198045	-2.46468	0.013713	#ERROR!
FAM76A	THAP9-AS1	0.744852	0	-0.01818	0.96024	-2.46467	0.013714	#ERROR!
GOLGA8H	THAP9-AS1	0.543435	3.86e-14	-0.35367	0.316078	-2.46258	0.013794	#ERROR!
ASF1A	THAP9-AS1	0.69778	0	-0.11515	0.75142	-2.46253	0.013796	#ERROR!
EFR3A	THAP9-AS1	0.721894	0	-0.06667	0.854813	-2.46185	0.013822	#ERROR!
HSF2BP	THAP9-AS1	0.508146	2.78e-12	-0.39514	0.258419	-2.46121	0.013847	#ERROR!
NUP42	THAP9-AS1	0.774894	0	0.054545	0.881036	-2.46061	0.01387	#ERROR!
LINC02332	THAP9-AS1	0.285702	0.000191	-0.59404	0.070163	-2.46037	0.013879	#ERROR!
IMMP2L	THAP9-AS1	0.70355	0	-0.10303	0.776998	-2.46018	0.013887	#ERROR!
PPP1R12B	THAP9-AS1	0.664055	0	-0.17576	0.627188	-2.46004	0.013892	#ERROR!
INKA2	THAP9-AS1	0.634732	0	-0.22424	0.533401	-2.4595	0.013913	#ERROR!
MRPS23	THAP9-AS1	0.618923	0	-0.24848	0.488776	-2.45858	0.013949	#ERROR!
LARP7	THAP9-AS1	0.842791	0	0.248485	0.488776	-2.45827	0.013961	#ERROR!
GPR22	THAP9-AS1	0.39121	1.87e-07	-0.51064	0.131502	-2.458	0.013971	#ERROR!
RNU6-375P	THAP9-AS1	0.140329	0.071343	-0.68335	0.029377	-2.45752	0.01399	0/-
HCCAT5	THAP9-AS1	0.270935	0.000415	-0.60302	0.064969	-2.45531	0.014076	#ERROR!
C2CD4D	THAP9-AS1	-0.13663	0.079202	0.684848	0.028883	2.45512	0.014084	0/+
NDFIP2-AS1	THAP9-AS1	0.241198	0.001745	-0.6228	0.054439	-2.45495	0.014091	#ERROR!
HMGB1P31	THAP9-AS1	0.688758	0	-0.12925	0.72195	-2.45482	0.014095	#ERROR!
DNAJC27	THAP9-AS1	0.806013	0	0.139394	0.700932	-2.454	0.014128	#ERROR!
RPL31P31	THAP9-AS1	0.130132	0.094705	-0.6881	0.027831	-2.45396	0.014129	0/-
POLK	THAP9-AS1	0.742943	0	-0.01818	0.96024	-2.45391	0.014131	#ERROR!
MOSMO	THAP9-AS1	0.783375	0	0.078788	0.828717	-2.45365	0.014141	#ERROR!
GOLT1B	THAP9-AS1	0.676373	0	-0.15152	0.676065	-2.45363	0.014142	#ERROR!
EHBP1	THAP9-AS1	0.742889	0	-0.01818	0.96024	-2.45361	0.014143	#ERROR!
MMD	THAP9-AS1	0.682917	0	-0.13939	0.700932	-2.45308	0.014164	#ERROR!
HAVCR1	THAP9-AS1	0.01569	0.840985	0.757576	0.011143	2.45293	0.01417	0/+
MED4	THAP9-AS1	0.753376	0	0.006061	0.986743	-2.45254	0.014185	#ERROR!
ATG16L1	THAP9-AS1	0.787827	0	0.090909	0.802772	-2.45219	0.014199	#ERROR!
HSP90B3P	THAP9-AS1	-0.3649	1.34e-06	0.530955	0.114301	2.45089	0.01425	-/0
MTFR1	THAP9-AS1	0.753064	0	0.006061	0.986743	-2.45073	0.014257	#ERROR!
RCN2	THAP9-AS1	0.682228	0	-0.13939	0.700932	-2.44983	0.014292	#ERROR!
LOC101927855	THAP9-AS1	0.257771	0.0008	-0.6105	0.060845	-2.44947	0.014307	#ERROR!
MAK16	THAP9-AS1	0.747469	0	-0.00606	0.986743	-2.44902	0.014325	#ERROR!
GOLGA7	THAP9-AS1	0.713491	0	-0.07879	0.828717	-2.44891	0.014329	#ERROR!
KCNMB3	THAP9-AS1	0.765537	0	0.036474	0.920318	-2.44829	0.014354	#ERROR!
DMPK	THAP9-AS1	0.624294	0	-0.23636	0.510885	-2.4482	0.014357	#ERROR!
FBXO8	THAP9-AS1	0.787222	0	0.090909	0.802772	-2.44819	0.014358	#ERROR!
CRY1	THAP9-AS1	0.75249	0	0.006061	0.986743	-2.44739	0.014389	#ERROR!
C1QTNF6	THAP9-AS1	0.424976	1.15e-08	0.890909	0.000542	2.44729	0.014394	#ERROR!
DTD2	THAP9-AS1	0.681663	0	-0.13939	0.700932	-2.44717	0.014398	#ERROR!
LYPD1	THAP9-AS1	0.335919	9.66e-06	-0.55319	0.097169	-2.44701	0.014405	#ERROR!
LOC100422204	THAP9-AS1	0.482844	4.45e-11	-0.41818	0.229113	-2.4463	0.014433	#ERROR!
OLA1	THAP9-AS1	0.735997	0	-0.0303	0.933773	-2.44586	0.014451	#ERROR!
RPL7P20	THAP9-AS1	0.348295	4.26e-06	-0.54307	0.104753	-2.44585	0.014451	#ERROR!
HAUS3	THAP9-AS1	0.825738	0	0.2	0.579584	-2.44551	0.014465	#ERROR!
C3orf33	THAP9-AS1	0.667667	0	-0.16364	0.651477	-2.44496	0.014487	#ERROR!
RPL17P11	THAP9-AS1	0.110832	0.155154	-0.69631	0.025293	-2.44433	0.014512	0/-
CZIB	THAP9-AS1	0.741104	0	-0.01818	0.96024	-2.44362	0.014541	#ERROR!
MRPS22	THAP9-AS1	0.746498	0	-0.00606	0.986743	-2.44349	0.014546	#ERROR!
FGF12	THAP9-AS1	0.554224	9.33e-15	-0.33333	0.346594	-2.44342	0.014549	#ERROR!
GEMIN6	THAP9-AS1	0.724204	0	-0.05455	0.881036	-2.44342	0.014549	#ERROR!
BCLAF1P2	THAP9-AS1	0.464664	2.85e-10	-0.43631	0.207452	-2.44311	0.014561	#ERROR!
LYRM1	THAP9-AS1	0.652825	0	-0.18788	0.603218	-2.44169	0.014619	#ERROR!
FAM104B	THAP9-AS1	0.699729	0	-0.10303	0.776998	-2.44125	0.014637	#ERROR!
LOC101927420	THAP9-AS1	0.507592	2.96e-12	-0.38896	0.266617	-2.44095	0.014649	#ERROR!
IQCG	THAP9-AS1	0.756441	0	0.018182	0.96024	-2.43997	0.014688	#ERROR!
HTR4	THAP9-AS1	0.29416	0.00012	0.854545	0.001637	2.43995	0.014689	#ERROR!
GTF2IP4	THAP9-AS1	0.734909	0	-0.0303	0.933773	-2.4399	0.014691	#ERROR!
C4orf36	THAP9-AS1	0.729185	0	-0.04242	0.907364	-2.43941	0.014711	#ERROR!
NME7	THAP9-AS1	0.686425	0	-0.12727	0.726057	-2.43864	0.014743	#ERROR!
KANSL1L	THAP9-AS1	0.785765	0	0.090909	0.802772	-2.43857	0.014746	#ERROR!
C1D	THAP9-AS1	0.711416	0	-0.07879	0.828717	-2.4383	0.014756	#ERROR!
PSCA	THAP9-AS1	0.232726	0.00255	-0.62424	0.053718	-2.4383	0.014757	#ERROR!
PCID2	THAP9-AS1	0.699084	0	-0.10303	0.776998	-2.43807	0.014766	#ERROR!
RAD54B	THAP9-AS1	0.763826	0	0.036474	0.920318	-2.43793	0.014772	#ERROR!
FOXI3	THAP9-AS1	-0.49127	1.81e-11	0.406181	0.244129	2.43771	0.01478	-/0
COX7A2L	THAP9-AS1	0.723079	0	-0.05455	0.881036	-2.43747	0.01479	#ERROR!
MIR1972-2	THAP9-AS1	0.099703	0.201227	-0.70065	0.024019	-2.43733	0.014796	0/-
CCDC102B	THAP9-AS1	0.636959	0	-0.21212	0.556306	-2.43688	0.014815	#ERROR!
COPS4	THAP9-AS1	0.692444	0	-0.11515	0.75142	-2.43655	0.014828	#ERROR!
CAP2	THAP9-AS1	0.552292	1.22e-14	-0.33333	0.346594	-2.43641	0.014834	#ERROR!
RPL21P4	THAP9-AS1	0.603619	0	-0.26301	0.462843	-2.43619	0.014843	#ERROR!
CCNYL6	THAP9-AS1	0.478175	7.25e-11	-0.41983	0.227099	-2.43604	0.014849	#ERROR!
PSMD14	THAP9-AS1	0.722776	0	-0.05455	0.881036	-2.43588	0.014856	#ERROR!
COPRS	THAP9-AS1	0.552107	1.24e-14	-0.33333	0.346594	-2.43575	0.014861	#ERROR!
RPL22L1	THAP9-AS1	0.596687	0	-0.27273	0.445838	-2.43528	0.01488	#ERROR!
CENPL	THAP9-AS1	0.72835	0	-0.04242	0.907364	-2.43492	0.014895	#ERROR!
CFAP298-TCP10L	THAP9-AS1	0.525586	3.57e-13	-0.36541	0.299116	-2.43364	0.014948	#ERROR!
ABCA11P	THAP9-AS1	0.824358	0	0.200609	0.578406	-2.43303	0.014973	#ERROR!
RAD1	THAP9-AS1	0.749952	0	0.006061	0.986743	-2.43274	0.014985	#ERROR!
LINC01450	THAP9-AS1	0.261891	0.000653	-0.60338	0.064767	-2.43224	0.015006	#ERROR!
APIP	THAP9-AS1	0.664692	0	-0.16364	0.651477	-2.4315	0.015036	#ERROR!
CUL5	THAP9-AS1	0.738908	0	-0.01818	0.96024	-2.4314	0.015041	#ERROR!
MTURN	THAP9-AS1	0.678183	0	-0.13939	0.700932	-2.43089	0.015062	#ERROR!
POLE3	THAP9-AS1	0.7217	0	-0.05455	0.881036	-2.43022	0.01509	#ERROR!
GPR137B	THAP9-AS1	0.649842	0	-0.18845	0.602095	-2.43015	0.015093	#ERROR!
CRTAP	THAP9-AS1	0.67124	0	-0.15152	0.676065	-2.42998	0.0151	#ERROR!
CCDC158	THAP9-AS1	0.687654	0	-0.12158	0.737938	-2.42995	0.015101	#ERROR!
RALGPS1	THAP9-AS1	0.77348	0	0.963636	7.32e-06	2.42965	0.015113	#ERROR!
MUC6	THAP9-AS1	-0.11115	0.153954	0.693012	0.026293	2.42911	0.015136	0/+
POLR3GL	THAP9-AS1	0.749178	0	0.006061	0.986743	-2.42829	0.01517	#ERROR!
C4orf33	THAP9-AS1	0.684189	0	-0.12727	0.726057	-2.42803	0.015181	#ERROR!
FAM111A-DT	THAP9-AS1	0.759437	0	0.030303	0.933773	-2.42717	0.015217	#ERROR!
C17orf99	THAP9-AS1	0.107675	0.16733	0.790439	0.006496	2.427	0.015224	0/+
CCL26	THAP9-AS1	0.427491	9.23e-09	-0.46809	0.172455	-2.42684	0.015231	#ERROR!
ITGA1	THAP9-AS1	0.66361	0	-0.16364	0.651477	-2.42663	0.01524	#ERROR!
KIAA0825	THAP9-AS1	0.63019	0	-0.21885	0.543551	-2.42617	0.015259	#ERROR!
MPDZ	THAP9-AS1	0.585629	0	-0.28485	0.425038	-2.42557	0.015284	#ERROR!
KRT72	THAP9-AS1	0.128136	0.099923	0.797821	0.005682	2.42509	0.015305	0/+
ABHD13	THAP9-AS1	0.726484	0	-0.04242	0.907364	-2.42495	0.01531	#ERROR!
PTN	THAP9-AS1	0.576535	4.44e-16	-0.29697	0.404702	-2.42435	0.015336	#ERROR!
LOC100128325	THAP9-AS1	0.081448	0.29686	-0.70733	0.022143	-2.42435	0.015336	0/-
MED7	THAP9-AS1	0.737583	0	-0.01818	0.96024	-2.42407	0.015348	#ERROR!
RPL32P32	THAP9-AS1	0.514602	1.32e-12	-0.37456	0.286254	-2.42241	0.015418	#ERROR!
LRRC58	THAP9-AS1	0.768424	0	0.054545	0.881036	-2.42037	0.015505	#ERROR!
LRRC37A17P	THAP9-AS1	0.689078	0	-0.11515	0.75142	-2.42035	0.015505	#ERROR!
BCL7B	THAP9-AS1	0.655069	0	-0.17576	0.627188	-2.42001	0.01552	#ERROR!
FAM72D	THAP9-AS1	0.725413	0	-0.04268	0.906799	-2.41991	0.015524	#ERROR!
CEP57L1	THAP9-AS1	0.782651	0	0.090909	0.802772	-2.41822	0.015597	#ERROR!
NPHP1	THAP9-AS1	0.675442	0	-0.13939	0.700932	-2.41816	0.015599	#ERROR!
NAB2	THAP9-AS1	0.654531	0	-0.17576	0.627188	-2.41765	0.015621	#ERROR!
C12orf71	THAP9-AS1	0.448081	1.42e-09	-0.44495	0.197561	-2.41738	0.015633	#ERROR!
LIMS1	THAP9-AS1	0.719035	0	-0.05455	0.881036	-2.41628	0.01568	#ERROR!
PEG3	THAP9-AS1	0.527008	3.01e-13	-0.35758	0.310376	-2.41591	0.015696	#ERROR!
RBX1	THAP9-AS1	0.661204	0	-0.16364	0.651477	-2.41584	0.015699	#ERROR!
MYLK	THAP9-AS1	0.574013	6.66e-16	-0.29697	0.404702	-2.41486	0.015741	#ERROR!
DENND5A	THAP9-AS1	0.639164	0	-0.2	0.579584	-2.41439	0.015762	#ERROR!
MOAP1	THAP9-AS1	0.730182	0	-0.0303	0.933773	-2.41423	0.015769	#ERROR!
KNSTRN	THAP9-AS1	0.646492	0	-0.18788	0.603218	-2.41412	0.015773	#ERROR!
ARSK	THAP9-AS1	0.724295	0	-0.04242	0.907364	-2.41332	0.015808	#ERROR!
RADX	THAP9-AS1	0.6463	0	-0.18788	0.603218	-2.41329	0.015809	#ERROR!
RCOR3	THAP9-AS1	0.77707	0	0.078788	0.828717	-2.4131	0.015817	#ERROR!
C17orf80	THAP9-AS1	0.706398	0	-0.07879	0.828717	-2.41292	0.015825	#ERROR!
RAB28	THAP9-AS1	0.80021	0	0.139394	0.700932	-2.41287	0.015828	#ERROR!
IGKV2-28	THAP9-AS1	0.309964	4.82e-05	-0.56364	0.089724	-2.41227	0.015853	#ERROR!
RNF38	THAP9-AS1	0.712319	0	-0.06667	0.854813	-2.41225	0.015854	#ERROR!
LINC01558	THAP9-AS1	0.333969	1.1e-05	0.863226	0.001294	2.41209	0.015862	#ERROR!
LINC01091	THAP9-AS1	0.64168	0	-0.19453	0.590207	-2.4108	0.015918	#ERROR!
FAM76B	THAP9-AS1	0.766753	0	0.054545	0.881036	-2.41013	0.015947	#ERROR!
PRELID3B	THAP9-AS1	0.666868	0	-0.15152	0.676065	-2.41006	0.01595	#ERROR!
IFNGR1	THAP9-AS1	0.666861	0	-0.15152	0.676065	-2.41003	0.015951	#ERROR!
LRR1	THAP9-AS1	0.680325	0	-0.12727	0.726057	-2.40984	0.01596	#ERROR!
MIR548AN	THAP9-AS1	0.361127	1.75e-06	-0.52223	0.121503	-2.40959	0.01597	#ERROR!
LOC100505774	THAP9-AS1	0.625757	0	-0.21952	0.542286	-2.40952	0.015973	#ERROR!
AP4S1	THAP9-AS1	0.563239	2.66e-15	-0.30909	0.384841	-2.40838	0.016024	#ERROR!
GOLGA8N	THAP9-AS1	0.711262	0	-0.06667	0.854813	-2.40685	0.016091	#ERROR!
EIF2S1	THAP9-AS1	0.705148	0	-0.07879	0.828717	-2.40665	0.016099	#ERROR!
RAB30	THAP9-AS1	0.704962	0	-0.07879	0.828717	-2.40572	0.01614	#ERROR!
RANBP6	THAP9-AS1	0.780637	0	0.090909	0.802772	-2.40519	0.016164	#ERROR!
RAB23	THAP9-AS1	0.665786	0	-0.15152	0.676065	-2.40516	0.016165	#ERROR!
ADGRF2	THAP9-AS1	0.258209	0.000783	-0.59887	0.067339	-2.40451	0.016194	#ERROR!
RPL21P125	THAP9-AS1	0.662819	0	-0.15633	0.666271	-2.4042	0.016208	#ERROR!
ETFRF1	THAP9-AS1	0.710734	0	-0.06667	0.854813	-2.40417	0.016209	#ERROR!
RNASEH2B	THAP9-AS1	0.658424	0	-0.16364	0.651477	-2.40345	0.016241	#ERROR!
DR1	THAP9-AS1	0.789602	0	0.115152	0.75142	-2.40235	0.01629	#ERROR!
RPL32P27	THAP9-AS1	0.316693	3.22e-05	-0.55565	0.095383	-2.40179	0.016315	#ERROR!
KCTD20	THAP9-AS1	0.727801	0	-0.0303	0.933773	-2.40144	0.016331	#ERROR!
AKAP6	THAP9-AS1	0.664908	0	-0.15152	0.676065	-2.4012	0.016341	#ERROR!
CDHR3	THAP9-AS1	0.678467	0	-0.12727	0.726057	-2.40116	0.016343	#ERROR!
C4orf48	THAP9-AS1	-0.5367	9.1e-14	0.340427	0.335782	2.4008	0.016359	-/0
IGF2-AS	THAP9-AS1	0.263009	0.000618	-0.59457	0.069851	-2.40066	0.016365	#ERROR!
CCDC181	THAP9-AS1	0.657611	0	-0.16364	0.651477	-2.39985	0.016402	#ERROR!
N4BP2L2	THAP9-AS1	0.779685	0	0.090909	0.802772	-2.39907	0.016437	#ERROR!
DPY30	THAP9-AS1	0.733007	0	-0.01818	0.96024	-2.39901	0.01644	#ERROR!
AKIRIN1	THAP9-AS1	0.759836	0	0.042424	0.907364	-2.399	0.01644	#ERROR!
ITGB1	THAP9-AS1	0.684569	0	-0.11515	0.75142	-2.39887	0.016446	#ERROR!
CACNB2	THAP9-AS1	0.611977	0	-0.23636	0.510885	-2.39804	0.016483	#ERROR!
IGHV1-2	THAP9-AS1	0.269757	0.00044	0.842424	0.00222	2.39771	0.016498	#ERROR!
NIBAN1	THAP9-AS1	0.603694	0	-0.24848	0.488776	-2.39739	0.016512	#ERROR!
CASTOR3	THAP9-AS1	0.657001	0	-0.16364	0.651477	-2.39714	0.016523	#ERROR!
NDUFB5	THAP9-AS1	0.709315	0	-0.06667	0.854813	-2.39697	0.016531	#ERROR!
BET1	THAP9-AS1	0.759371	0	0.042424	0.907364	-2.39623	0.016565	#ERROR!
ATP6V1D	THAP9-AS1	0.732471	0	-0.01818	0.96024	-2.39609	0.016571	#ERROR!
RAB18	THAP9-AS1	0.74866	0	0.018182	0.96024	-2.39482	0.016629	#ERROR!
MORN2	THAP9-AS1	0.717708	0	-0.04863	0.893868	-2.39446	0.016645	#ERROR!
PSMD6	THAP9-AS1	0.764138	0	0.054545	0.881036	-2.39424	0.016655	#ERROR!
CBX3	THAP9-AS1	0.753832	0	0.030303	0.933773	-2.39418	0.016658	#ERROR!
RNU6-1266P	THAP9-AS1	0.219928	0.004412	-0.62176	0.054961	-2.39416	0.016659	#ERROR!
IFT20	THAP9-AS1	0.696161	0	-0.09091	0.802772	-2.39295	0.016713	#ERROR!
CALD1	THAP9-AS1	0.568043	1.33e-15	-0.29697	0.404702	-2.39257	0.016731	#ERROR!
PLCB1	THAP9-AS1	0.626269	0	-0.21212	0.556306	-2.39212	0.016751	#ERROR!
RNU6-343P	THAP9-AS1	0.540809	5.42e-14	-0.33202	0.348619	-2.39149	0.01678	#ERROR!
APLF	THAP9-AS1	0.725853	0	-0.0303	0.933773	-2.39105	0.0168	#ERROR!
MYCBP	THAP9-AS1	0.737082	0	-0.00606	0.986743	-2.39081	0.016811	#ERROR!
CENPQ	THAP9-AS1	0.708083	0	-0.06667	0.854813	-2.39074	0.016815	#ERROR!
HOPX	THAP9-AS1	0.251363	0.001088	-0.6	0.066688	-2.39054	0.016824	#ERROR!
IFI27L2	THAP9-AS1	0.549009	1.87e-14	-0.32121	0.365468	-2.3904	0.01683	#ERROR!
LLPH-DT	THAP9-AS1	0.164777	0.033881	0.806249	0.004844	2.39031	0.016834	#ERROR!
HMGN1P8	THAP9-AS1	0.553906	9.77e-15	-0.31463	0.375933	-2.38967	0.016863	#ERROR!
RFTN2	THAP9-AS1	0.655276	0	-0.16364	0.651477	-2.38952	0.01687	#ERROR!
RPL7AP41	THAP9-AS1	0.328766	1.53e-05	-0.54272	0.105019	-2.38911	0.016889	#ERROR!
REEP1	THAP9-AS1	0.429224	7.92e-09	-0.45455	0.186905	-2.38889	0.016899	#ERROR!
HBS1L	THAP9-AS1	0.782837	0	0.10303	0.776998	-2.38864	0.016911	#ERROR!
IER3IP1	THAP9-AS1	0.741906	0	0.006061	0.986743	-2.38709	0.016982	#ERROR!
RAN	THAP9-AS1	0.681931	0	-0.11515	0.75142	-2.38642	0.017013	#ERROR!
RN7SL752P	THAP9-AS1	0.623489	0	-0.21408	0.552586	-2.3858	0.017042	#ERROR!
DDX58	THAP9-AS1	0.654377	0	-0.16364	0.651477	-2.38556	0.017053	#ERROR!
LCORL	THAP9-AS1	0.787058	0	0.115152	0.75142	-2.38544	0.017059	#ERROR!
HAUS1	THAP9-AS1	0.624619	0	-0.21212	0.556306	-2.38531	0.017065	#ERROR!
MICU3	THAP9-AS1	0.591986	0	-0.26061	0.467089	-2.38415	0.017119	#ERROR!
LINC00887	THAP9-AS1	0.35457	2.77e-06	-0.52025	0.123182	-2.3838	0.017135	#ERROR!
RGS5	THAP9-AS1	0.646596	0	-0.17576	0.627188	-2.38302	0.017171	#ERROR!
FAM32A	THAP9-AS1	0.751831	0	0.030303	0.933773	-2.38255	0.017193	#ERROR!
ARPC5	THAP9-AS1	0.724203	0	-0.0303	0.933773	-2.3823	0.017205	#ERROR!
LYRM4	THAP9-AS1	0.615828	0	-0.22424	0.533401	-2.38138	0.017248	#ERROR!
C1orf146	THAP9-AS1	0.497565	9.11e-12	-0.38021	0.27845	-2.38137	0.017248	#ERROR!
GCSH	THAP9-AS1	0.653231	0	-0.16364	0.651477	-2.38052	0.017288	#ERROR!
HLA-F-AS1	THAP9-AS1	0.631088	0	-0.2	0.579584	-2.38032	0.017297	#ERROR!
ARL13B	THAP9-AS1	0.705762	0	-0.06667	0.854813	-2.37906	0.017357	#ERROR!
MAS1L	THAP9-AS1	0.109893	0.158703	-0.68294	0.029513	-2.37777	0.017418	0/-
PABPC4L	THAP9-AS1	0.564019	2.66e-15	-0.29697	0.404702	-2.37767	0.017422	#ERROR!
ALMS1-IT1	THAP9-AS1	0.7203	0	-0.03659	0.920075	-2.3776	0.017426	#ERROR!
LINC00272	THAP9-AS1	0.182305	0.018732	0.810731	0.004437	2.37739	0.017435	#ERROR!
RN7SL333P	THAP9-AS1	0.581173	2.22e-16	-0.27333	0.4448	-2.37713	0.017448	#ERROR!
LCA5	THAP9-AS1	0.66635	0	-0.13939	0.700932	-2.37655	0.017475	#ERROR!
MRPS36	THAP9-AS1	0.686252	0	-0.10303	0.776998	-2.37599	0.017502	#ERROR!
CHROMR	THAP9-AS1	0.679605	0	-0.11515	0.75142	-2.37551	0.017525	#ERROR!
RBM43	THAP9-AS1	0.672566	0	-0.12727	0.726057	-2.37385	0.017604	#ERROR!
RNU6-549P	THAP9-AS1	0.348616	4.17e-06	-0.52223	0.121503	-2.37357	0.017617	#ERROR!
C3orf49	THAP9-AS1	0.624639	0	-0.20732	0.565481	-2.37275	0.017656	#ERROR!
GPR52	THAP9-AS1	0.287378	0.000174	-0.5698	0.085504	-2.37273	0.017657	#ERROR!
INKA2-AS1	THAP9-AS1	0.408432	4.69e-08	-0.46922	0.171281	-2.37237	0.017675	#ERROR!
NEXN	THAP9-AS1	0.643981	0	-0.17576	0.627188	-2.37175	0.017704	#ERROR!
DUSP19	THAP9-AS1	0.672105	0	-0.12727	0.726057	-2.37173	0.017705	#ERROR!
LINC02884	THAP9-AS1	0.402831	7.42e-08	-0.47417	0.166192	-2.37152	0.017715	#ERROR!
ERAP2	THAP9-AS1	0.341766	6.59e-06	-0.52727	0.117308	-2.3715	0.017716	#ERROR!
ASCC1	THAP9-AS1	0.671969	0	-0.12727	0.726057	-2.3711	0.017735	#ERROR!
FAXDC2	THAP9-AS1	0.533986	1.28e-13	-0.33333	0.346594	-2.37107	0.017737	#ERROR!
EXOSC8	THAP9-AS1	0.727757	0	-0.01818	0.96024	-2.37069	0.017755	#ERROR!
IGKV2D-19	THAP9-AS1	-0.0817	0.295351	0.696311	0.025293	2.37034	0.017772	0/+
CA14	THAP9-AS1	0.565888	2e-15	-0.29179	0.413327	-2.37032	0.017773	#ERROR!
CRAT	THAP9-AS1	0.450154	1.17e-09	0.890909	0.000542	2.36892	0.01784	#ERROR!
GSKIP	THAP9-AS1	0.620426	0	-0.21212	0.556306	-2.36808	0.017881	#ERROR!
DYNC2LI1	THAP9-AS1	0.764866	0	0.066667	0.854813	-2.36804	0.017883	#ERROR!
MFAP5	THAP9-AS1	0.383156	3.49e-07	-0.49091	0.149656	-2.36788	0.01789	#ERROR!
PTGDR2	THAP9-AS1	0.108652	0.163487	0.781818	0.007547	2.36772	0.017898	0/+
LINC02482	THAP9-AS1	0.502608	5.2e-12	-0.3697	0.29305	-2.36751	0.017908	#ERROR!
HTD2	THAP9-AS1	0.622458	0	-0.2086	0.563022	-2.36715	0.017926	#ERROR!
LINC01799	THAP9-AS1	0.252228	0.001044	-0.5933	0.070604	-2.36667	0.017949	#ERROR!
PCDH9	THAP9-AS1	0.532522	1.53e-13	-0.33333	0.346594	-2.36592	0.017985	#ERROR!
MYBL1	THAP9-AS1	0.690437	0	-0.09091	0.802772	-2.36521	0.01802	#ERROR!
NANP	THAP9-AS1	0.656037	0	-0.15152	0.676065	-2.3616	0.018196	#ERROR!
PPIL4	THAP9-AS1	0.748186	0	0.030303	0.933773	-2.36158	0.018197	#ERROR!
ARL5A	THAP9-AS1	0.720209	0	-0.0303	0.933773	-2.36129	0.018211	#ERROR!
E2F5	THAP9-AS1	0.725943	0	-0.01818	0.96024	-2.36101	0.018225	#ERROR!
RN7SKP50	THAP9-AS1	0.069495	0.373633	-0.70065	0.024019	-2.36076	0.018237	0/-
OMD	THAP9-AS1	0.352551	3.19e-06	-0.51515	0.127553	-2.36048	0.018251	#ERROR!
LRRC8C-DT	THAP9-AS1	0.601469	0	-0.23781	0.508227	-2.36005	0.018273	#ERROR!
NANOS1	THAP9-AS1	0.549966	1.67e-14	-0.30909	0.384841	-2.35998	0.018276	#ERROR!
HACD1	THAP9-AS1	0.307059	5.72e-05	-0.55152	0.098401	-2.35993	0.018278	#ERROR!
MARCHF1	THAP9-AS1	0.69545	0	-0.07879	0.828717	-2.35876	0.018336	#ERROR!
LINC01433	THAP9-AS1	0.500865	6.32e-12	-0.36851	0.294718	-2.3582	0.018364	#ERROR!
ICA1L	THAP9-AS1	0.593655	0	-0.24848	0.488776	-2.35801	0.018373	#ERROR!
RAD51B	THAP9-AS1	0.68881	0	-0.09091	0.802772	-2.35741	0.018403	#ERROR!
CCZ1B	THAP9-AS1	0.654836	0	-0.15152	0.676065	-2.35631	0.018458	#ERROR!
CENPU	THAP9-AS1	0.67537	0	-0.11515	0.75142	-2.35582	0.018482	#ERROR!
CMC1	THAP9-AS1	0.713229	0	-0.04242	0.907364	-2.35572	0.018487	#ERROR!
NAP1L5	THAP9-AS1	0.713227	0	-0.04242	0.907364	-2.3557	0.018488	#ERROR!
DUXAP10	THAP9-AS1	0.291743	0.000137	-0.56183	0.090983	-2.35522	0.018512	#ERROR!
RPL26	THAP9-AS1	0.724559	0	-0.01818	0.96024	-2.35366	0.018589	#ERROR!
ALDH8A1	THAP9-AS1	0.462075	3.69e-10	-0.4098	0.23954	-2.35356	0.018594	#ERROR!
ITM2A	THAP9-AS1	0.519013	7.85e-13	-0.34545	0.328227	-2.35341	0.018602	#ERROR!
RINT1	THAP9-AS1	0.751952	0	0.042424	0.907364	-2.35271	0.018637	#ERROR!
LYPLA1	THAP9-AS1	0.681286	0	-0.10303	0.776998	-2.35252	0.018647	#ERROR!
DDX59	THAP9-AS1	0.735579	0	0.006061	0.986743	-2.35205	0.018671	#ERROR!
CIRBP	THAP9-AS1	0.767197	0	0.078788	0.828717	-2.35157	0.018695	#ERROR!
CLASP2	THAP9-AS1	0.767168	0	0.078788	0.828717	-2.35139	0.018703	#ERROR!
NT5DC3	THAP9-AS1	0.63165	0	-0.18788	0.603218	-2.35098	0.018724	#ERROR!
DERL2	THAP9-AS1	0.735352	0	0.006061	0.986743	-2.3508	0.018733	#ERROR!
FAM133A	THAP9-AS1	0.421616	1.54e-08	-0.44985	0.192076	-2.35066	0.01874	#ERROR!
EIF3J-DT	THAP9-AS1	0.723955	0	-0.01818	0.96024	-2.35047	0.01875	#ERROR!
NSL1	THAP9-AS1	0.687221	0	-0.09091	0.802772	-2.34982	0.018783	#ERROR!
DUSP22	THAP9-AS1	0.680704	0	-0.10303	0.776998	-2.34979	0.018784	#ERROR!
MROCKI	THAP9-AS1	0.667098	0	-0.12727	0.726057	-2.34889	0.01883	#ERROR!
RNF14	THAP9-AS1	0.680336	0	-0.10303	0.776998	-2.34807	0.018871	#ERROR!
PAQR9-AS1	THAP9-AS1	0.072691	0.352004	-0.69631	0.025293	-2.34753	0.018898	0/-
RABGAP1	THAP9-AS1	0.812925	0	0.2	0.579584	-2.34737	0.018906	#ERROR!
BZW1	THAP9-AS1	0.740222	0	0.018182	0.96024	-2.34719	0.018916	#ERROR!
RPL7AP7	THAP9-AS1	-0.02552	0.744192	-0.74348	0.013712	-2.34698	0.018926	0/-
DYNLL1	THAP9-AS1	0.745597	0	0.030303	0.933773	-2.34685	0.018933	#ERROR!
RPL27A	THAP9-AS1	0.686546	0	-0.09091	0.802772	-2.3466	0.018946	#ERROR!
PNO1	THAP9-AS1	0.705382	0	-0.05455	0.881036	-2.34655	0.018948	#ERROR!
EBLN3P	THAP9-AS1	0.781081	0	0.115152	0.75142	-2.3464	0.018956	#ERROR!
PKMP3	THAP9-AS1	0.536629	9.19e-14	-0.32121	0.365468	-2.34623	0.018964	#ERROR!
PELO	THAP9-AS1	0.652487	0	-0.15152	0.676065	-2.34598	0.018977	#ERROR!
RPS10P31	THAP9-AS1	0.189613	0.014414	-0.62925	0.051264	-2.3455	0.019002	#ERROR!
DNAJC5B	THAP9-AS1	0.402143	7.85e-08	-0.46667	0.173939	-2.34521	0.019016	#ERROR!
BBS2	THAP9-AS1	0.750629	0	0.042424	0.907364	-2.34507	0.019024	#ERROR!
NIP7	THAP9-AS1	0.73422	0	0.006061	0.986743	-2.3446	0.019047	#ERROR!
PPP3CB	THAP9-AS1	0.716953	0	-0.0303	0.933773	-2.34435	0.01906	#ERROR!
HMGB1P5	THAP9-AS1	0.728417	0	-0.00606	0.986743	-2.34371	0.019093	#ERROR!
AMDHD2	THAP9-AS1	0.289546	0.000154	0.842424	0.00222	2.34368	0.019094	#ERROR!
GPATCH2L	THAP9-AS1	0.755629	0	0.054545	0.881036	-2.34357	0.0191	#ERROR!
ARHGEF33	THAP9-AS1	0.608989	0	-0.22019	0.541011	-2.34312	0.019123	#ERROR!
PEX2	THAP9-AS1	0.692127	0	-0.07879	0.828717	-2.34264	0.019148	#ERROR!
PKIG	THAP9-AS1	0.484411	3.77e-11	-0.38182	0.276255	-2.34248	0.019156	#ERROR!
ARPC3	THAP9-AS1	0.744769	0	0.030303	0.933773	-2.34217	0.019172	#ERROR!
POLR1F	THAP9-AS1	0.733717	0	0.006061	0.986743	-2.34186	0.019188	#ERROR!
RNA5SP379	THAP9-AS1	0.311859	4.31e-05	-0.54272	0.105019	-2.3417	0.019196	#ERROR!
CUL2	THAP9-AS1	0.749966	0	0.042424	0.907364	-2.34125	0.019219	#ERROR!
PPAT	THAP9-AS1	0.820562	0	0.224242	0.533401	-2.34122	0.019221	#ERROR!
PHBP4	THAP9-AS1	-0.33682	9.11e-06	0.522233	0.121503	2.33994	0.019287	-/0
ITGA10	THAP9-AS1	0.595268	0	-0.23928	0.505525	-2.33967	0.019301	#ERROR!
NDUFB1	THAP9-AS1	0.684997	0	-0.09091	0.802772	-2.33924	0.019323	#ERROR!
COQ3	THAP9-AS1	0.703849	0	-0.05455	0.881036	-2.33888	0.019341	#ERROR!
RPL21P129	THAP9-AS1	0.189973	0.014226	-0.62711	0.052303	-2.33754	0.019411	#ERROR!
FAT3	THAP9-AS1	0.534125	1.25e-13	-0.32121	0.365468	-2.3374	0.019418	#ERROR!
FUNDC2	THAP9-AS1	0.55296	1.11e-14	-0.29697	0.404702	-2.33722	0.019428	#ERROR!
IGHV1-58	THAP9-AS1	0.120774	0.121146	0.781818	0.007547	2.33681	0.019449	0/+
BBX	THAP9-AS1	0.75438	0	0.054545	0.881036	-2.33625	0.019478	#ERROR!
RNU2-33P	THAP9-AS1	0.459481	4.75e-10	-0.40681	0.243328	-2.33624	0.019479	#ERROR!
BBOF1	THAP9-AS1	0.697004	0	-0.06667	0.854813	-2.33569	0.019508	#ERROR!
CNIH1	THAP9-AS1	0.657092	0	-0.13939	0.700932	-2.33511	0.019538	#ERROR!
HECTD2	THAP9-AS1	0.642738	0	-0.16364	0.651477	-2.33501	0.019543	#ERROR!
MSANTD3	THAP9-AS1	0.709103	0	-0.04242	0.907364	-2.33471	0.019559	#ERROR!
LURAP1L-AS1	THAP9-AS1	0.60579	0	-0.22156	0.538428	-2.334	0.019596	#ERROR!
MINDY2	THAP9-AS1	0.743291	0	0.030303	0.933773	-2.33384	0.019604	#ERROR!
NEK10	THAP9-AS1	0.642441	0	-0.16364	0.651477	-2.33373	0.01961	#ERROR!
CCDC90B	THAP9-AS1	0.690259	0	-0.07879	0.828717	-2.33364	0.019615	#ERROR!
PCGF5	THAP9-AS1	0.71484	0	-0.0303	0.933773	-2.33344	0.019625	#ERROR!
DDX20	THAP9-AS1	0.769215	0	0.090909	0.802772	-2.33323	0.019636	#ERROR!
RPL12P12	THAP9-AS1	0.751277	0	0.048632	0.893868	-2.33315	0.01964	#ERROR!
LEPROT	THAP9-AS1	0.689796	0	-0.07879	0.828717	-2.33141	0.019732	#ERROR!
NUDT15	THAP9-AS1	0.683243	0	-0.09091	0.802772	-2.33095	0.019756	#ERROR!
RPRD1A	THAP9-AS1	0.708124	0	-0.04242	0.907364	-2.32976	0.019819	#ERROR!
LKAAEAR1	THAP9-AS1	-0.35385	2.91e-06	0.504823	0.136705	2.3291	0.019854	-/0
PTGER4P2-CDK2AP2P2	THAP9-AS1	0.279365	0.000267	-0.56384	0.089579	-2.32871	0.019874	#ERROR!
OSER1	THAP9-AS1	0.577323	4.44e-16	-0.26061	0.467089	-2.32809	0.019907	#ERROR!
EXOC6	THAP9-AS1	0.75275	0	0.054545	0.881036	-2.32677	0.019978	#ERROR!
RPF2	THAP9-AS1	0.752651	0	0.054545	0.881036	-2.32619	0.020008	#ERROR!
CEP112	THAP9-AS1	0.701271	0	-0.05455	0.881036	-2.32608	0.020014	#ERROR!
CNEP1R1	THAP9-AS1	0.760513	0	0.072949	0.841271	-2.32596	0.020021	#ERROR!
EMG1	THAP9-AS1	0.675502	0	-0.10303	0.776998	-2.32556	0.020042	#ERROR!
RN7SL531P	THAP9-AS1	0.095391	0.221509	0.769803	0.009206	2.32549	0.020046	0/+
PPCS	THAP9-AS1	0.74176	0	0.030303	0.933773	-2.32525	0.020059	#ERROR!
LOC645485	THAP9-AS1	0.232018	0.002631	-0.59632	0.068818	-2.32443	0.020102	#ERROR!
C1orf194	THAP9-AS1	0.446635	1.62e-09	-0.41628	0.23146	-2.32425	0.020112	#ERROR!
RNF217-AS1	THAP9-AS1	0.407936	4.89e-08	-0.45455	0.186905	-2.32394	0.020129	#ERROR!
GPM6B	THAP9-AS1	0.503975	4.46e-12	-0.35259	0.317662	-2.3226	0.020201	#ERROR!
FAM162A	THAP9-AS1	0.746683	0	0.042424	0.907364	-2.32248	0.020207	#ERROR!
IFT22	THAP9-AS1	0.647081	0	-0.15152	0.676065	-2.32244	0.020209	#ERROR!
RNF180	THAP9-AS1	0.60102	0	-0.22424	0.533401	-2.32221	0.020222	#ERROR!
LRRC9	THAP9-AS1	0.424087	1.24e-08	-0.43835	0.205094	-2.32218	0.020223	#ERROR!
RPL32P25	THAP9-AS1	-0.01233	0.874723	0.721284	0.018556	2.32167	0.020251	0/+
LINC00471	THAP9-AS1	0.645205	0	-0.15435	0.670294	-2.32163	0.020253	#ERROR!
GPATCH11	THAP9-AS1	0.762191	0	0.078788	0.828717	-2.32123	0.020275	#ERROR!
FAM161A	THAP9-AS1	0.767237	0	0.090909	0.802772	-2.32109	0.020282	#ERROR!
LYSMD2	THAP9-AS1	0.566042	1.78e-15	-0.27356	0.444399	-2.32101	0.020286	#ERROR!
PHF10	THAP9-AS1	0.767211	0	0.090909	0.802772	-2.32093	0.02029	#ERROR!
ERCC6L2	THAP9-AS1	0.786716	0	0.139818	0.700057	-2.32008	0.020336	#ERROR!
LDB3	THAP9-AS1	0.566304	1.78e-15	-0.27273	0.445838	-2.31973	0.020356	#ERROR!
MAGOH	THAP9-AS1	0.772003	0	0.10303	0.776998	-2.31971	0.020356	#ERROR!
IBSP	THAP9-AS1	0.245038	0.001463	-0.5859	0.075097	-2.31886	0.020403	#ERROR!
REXO2	THAP9-AS1	0.705942	0	-0.04242	0.907364	-2.31878	0.020407	#ERROR!
LINC01932	THAP9-AS1	0.236168	0.002189	-0.59186	0.071461	-2.31814	0.020442	#ERROR!
ORC5	THAP9-AS1	0.699602	0	-0.05455	0.881036	-2.31783	0.020459	#ERROR!
RPL9P21	THAP9-AS1	0.615106	0	-0.20122	0.577218	-2.31778	0.020461	#ERROR!
PRH1	THAP9-AS1	0.723495	0	-0.00608	0.986703	-2.31758	0.020472	#ERROR!
RN7SKP239	THAP9-AS1	0.375563	6.16e-07	-0.48242	0.157911	-2.31757	0.020473	#ERROR!
FEM1B	THAP9-AS1	0.729193	0	0.006061	0.986743	-2.31738	0.020483	#ERROR!
MAPK8	THAP9-AS1	0.771303	0	0.10303	0.776998	-2.31536	0.020593	#ERROR!
RPL17P41	THAP9-AS1	0.084512	0.278996	-0.68335	0.029377	-2.31523	0.020601	0/-
PAIP1	THAP9-AS1	0.717021	0	-0.01818	0.96024	-2.31418	0.020658	#ERROR!
PRKG1	THAP9-AS1	0.652267	0	-0.13939	0.700932	-2.31386	0.020676	#ERROR!
LPAR6	THAP9-AS1	0.606909	0	-0.21212	0.556306	-2.31351	0.020694	#ERROR!
MNAT1	THAP9-AS1	0.72271	0	-0.00606	0.986743	-2.31339	0.020701	#ERROR!
BTF3	THAP9-AS1	0.710899	0	-0.0303	0.933773	-2.31328	0.020707	#ERROR!
AQP6	THAP9-AS1	0.369591	9.56e-07	-0.48632	0.15408	-2.31296	0.020725	#ERROR!
PLD6	THAP9-AS1	0.606757	0	-0.21212	0.556306	-2.31291	0.020728	#ERROR!
BPNT2	THAP9-AS1	0.755578	0	0.066667	0.854813	-2.31266	0.020742	#ERROR!
PLEKHA3	THAP9-AS1	0.739494	0	0.030303	0.933773	-2.31262	0.020744	#ERROR!
FGD5-AS1	THAP9-AS1	0.760601	0	0.078788	0.828717	-2.31171	0.020794	#ERROR!
DRAM1	THAP9-AS1	0.589482	0	-0.23708	0.509561	-2.31137	0.020812	#ERROR!
PLA2G2C	THAP9-AS1	0.440648	2.83e-09	-0.41818	0.229113	-2.31129	0.020817	#ERROR!
KIF15	THAP9-AS1	0.760487	0	0.078788	0.828717	-2.31103	0.020831	#ERROR!
ITPR1	THAP9-AS1	0.658661	0	-0.12727	0.726057	-2.31102	0.020832	#ERROR!
KLHL2	THAP9-AS1	0.775404	0	0.115152	0.75142	-2.31017	0.020879	#ERROR!
MIR4435-2HG	THAP9-AS1	0.597868	0	-0.22424	0.533401	-2.30983	0.020897	#ERROR!
DUSP11	THAP9-AS1	0.733424	0	0.018182	0.96024	-2.30976	0.020901	#ERROR!
CASC2	THAP9-AS1	0.709904	0	-0.0303	0.933773	-2.30823	0.020987	#ERROR!
COX11	THAP9-AS1	0.691066	0	-0.06667	0.854813	-2.30686	0.021063	#ERROR!
HACE1	THAP9-AS1	0.684553	0	-0.07879	0.828717	-2.30641	0.021088	#ERROR!
ING3	THAP9-AS1	0.74383	0	0.042424	0.907364	-2.30633	0.021092	#ERROR!
NIFK-AS1	THAP9-AS1	0.738227	0	0.030303	0.933773	-2.3056	0.021133	#ERROR!
IRAK1BP1	THAP9-AS1	0.677793	0	-0.09091	0.802772	-2.3054	0.021144	#ERROR!
MIR8078	THAP9-AS1	0.324564	1.99e-05	-0.52223	0.121503	-2.30531	0.021149	#ERROR!
ANAPC1P4	THAP9-AS1	0.586321	0	-0.23928	0.505525	-2.30508	0.021162	#ERROR!
MAGEC1	THAP9-AS1	0.055809	0.475117	-0.69631	0.025293	-2.30487	0.021174	0/-
PPBP	THAP9-AS1	0.064822	0.406689	-0.69148	0.026767	-2.30417	0.021213	0/-
CAV1	THAP9-AS1	0.514693	1.3e-12	-0.33333	0.346594	-2.30411	0.021217	#ERROR!
MTND1P8	THAP9-AS1	0.396147	1.27e-07	-0.45924	0.18182	-2.30348	0.021252	#ERROR!
KRT18P27	THAP9-AS1	0.422566	1.42e-08	-0.43354	0.210683	-2.30258	0.021303	#ERROR!
PABPC1L	THAP9-AS1	0.470926	1.52e-10	0.890909	0.000542	2.30257	0.021303	#ERROR!
PPEF1	THAP9-AS1	0.38481	3.07e-07	-0.46922	0.171281	-2.30182	0.021345	#ERROR!
PIN4	THAP9-AS1	0.670218	0	-0.10303	0.776998	-2.30126	0.021377	#ERROR!
GPRASP1	THAP9-AS1	0.663316	0	-0.11515	0.75142	-2.30086	0.0214	#ERROR!
PGR	THAP9-AS1	0.561174	3.55e-15	-0.27273	0.445838	-2.3008	0.021403	#ERROR!
MRPS15	THAP9-AS1	0.619444	0	-0.18788	0.603218	-2.30052	0.021419	#ERROR!
LOC100996419	THAP9-AS1	0.672918	0	-0.09756	0.788601	-2.29974	0.021463	#ERROR!
LOC101928565	THAP9-AS1	0.15513	0.045966	0.789542	0.0066	2.29947	0.021478	#ERROR!
LINC01749	THAP9-AS1	0.053632	0.492544	-0.69631	0.025293	-2.29938	0.021484	0/-
MS4A15	THAP9-AS1	-0.01096	0.888539	0.717624	0.019454	2.29913	0.021497	0/+
MRPL17	THAP9-AS1	0.682738	0	-0.07879	0.828717	-2.29784	0.021571	#ERROR!
CD63	THAP9-AS1	0.68897	0	-0.06667	0.854813	-2.29679	0.021631	#ERROR!
NEDD4	THAP9-AS1	0.655361	0	-0.12727	0.726057	-2.29641	0.021653	#ERROR!
COX7A1	THAP9-AS1	0.283298	0.000217	-0.55152	0.098401	-2.29443	0.021766	#ERROR!
PSMD10	THAP9-AS1	0.640509	0	-0.15152	0.676065	-2.2942	0.021779	#ERROR!
CHMP5	THAP9-AS1	0.681912	0	-0.07879	0.828717	-2.29395	0.021793	#ERROR!
MRPS14	THAP9-AS1	0.741552	0	0.042424	0.907364	-2.29355	0.021817	#ERROR!
RPL21	THAP9-AS1	0.632765	0	-0.16364	0.651477	-2.29271	0.021865	#ERROR!
GCA	THAP9-AS1	0.767374	0	0.10303	0.776998	-2.29113	0.021956	#ERROR!
RPL26P37	THAP9-AS1	0.590187	0	-0.22843	0.525569	-2.29108	0.021959	#ERROR!
NLGN1	THAP9-AS1	0.479424	6.37e-11	-0.3697	0.29305	-2.29062	0.021985	#ERROR!
FKBP14	THAP9-AS1	0.756999	0	0.078788	0.828717	-2.29034	0.022001	#ERROR!
NPL	THAP9-AS1	0.653916	0	-0.12727	0.726057	-2.29004	0.022019	#ERROR!
METTL22	THAP9-AS1	0.71229	0	-0.01824	0.960119	-2.28999	0.022022	#ERROR!
NCALD	THAP9-AS1	0.592685	0	-0.22424	0.533401	-2.28963	0.022043	#ERROR!
CASP8AP2	THAP9-AS1	0.756763	0	0.078788	0.828717	-2.28896	0.022082	#ERROR!
CHIT1	THAP9-AS1	0.294828	0.000115	-0.54104	0.106318	-2.2885	0.022108	#ERROR!
MRPL13	THAP9-AS1	0.723742	0	0.006061	0.986743	-2.28833	0.022118	#ERROR!
RPL14	THAP9-AS1	0.75665	0	0.078788	0.828717	-2.28829	0.022121	#ERROR!
RORA	THAP9-AS1	0.642195	0	-0.1459	0.687557	-2.28694	0.022199	#ERROR!
FUNDC1	THAP9-AS1	0.666692	0	-0.10334	0.776334	-2.28602	0.022253	#ERROR!
CRPPA-AS1	THAP9-AS1	0.449415	1.25e-09	-0.40045	0.251483	-2.28521	0.0223	#ERROR!
GNB5	THAP9-AS1	0.607725	0	-0.2	0.579584	-2.28491	0.022318	#ERROR!
RPL21P28	THAP9-AS1	0.659431	0	-0.1155	0.750683	-2.28438	0.022349	#ERROR!
GLRX3	THAP9-AS1	0.63069	0	-0.16364	0.651477	-2.28401	0.022371	#ERROR!
ANXA1	THAP9-AS1	0.623021	0	-0.17576	0.627188	-2.28363	0.022393	#ERROR!
PTPMT1	THAP9-AS1	0.692586	0	-0.05455	0.881036	-2.28358	0.022396	#ERROR!
FERMT2	THAP9-AS1	0.53781	7.9e-14	-0.29697	0.404702	-2.28296	0.022433	#ERROR!
KIN	THAP9-AS1	0.804025	0	0.2	0.579584	-2.28271	0.022448	#ERROR!
LOC101927023	THAP9-AS1	0.098887	0.204959	-0.66821	0.034689	-2.28159	0.022514	0/-
RPL21P19	THAP9-AS1	0.563456	2.66e-15	-0.2622	0.464269	-2.28067	0.022568	#ERROR!
NAPG	THAP9-AS1	0.722177	0	0.006061	0.986743	-2.28008	0.022603	#ERROR!
COA1	THAP9-AS1	0.722166	0	0.006061	0.986743	-2.28003	0.022606	#ERROR!
LINC01138	THAP9-AS1	0.710251	0	-0.01824	0.960119	-2.27961	0.022631	#ERROR!
AMIGO2	THAP9-AS1	0.5552	8.44e-15	-0.27273	0.445838	-2.27897	0.022669	#ERROR!
ARMC10	THAP9-AS1	0.754961	0	0.078788	0.828717	-2.27838	0.022704	#ERROR!
PLCD4	THAP9-AS1	0.709819	0	-0.01818	0.96024	-2.27727	0.02277	#ERROR!
CALM1	THAP9-AS1	0.715769	0	-0.00606	0.986743	-2.2772	0.022774	#ERROR!
LOC101929709	THAP9-AS1	0.807677	0	0.212121	0.556306	-2.27706	0.022782	#ERROR!
CEP78	THAP9-AS1	0.775041	0	0.127273	0.726057	-2.27692	0.022791	#ERROR!
ANGPT1	THAP9-AS1	0.500492	6.59e-12	-0.34043	0.335782	-2.2761	0.02284	#ERROR!
B3GALNT1	THAP9-AS1	0.485516	3.36e-11	-0.35758	0.310376	-2.27545	0.022879	#ERROR!
BVES	THAP9-AS1	0.506152	3.48e-12	-0.33333	0.346594	-2.27504	0.022903	#ERROR!
RDX	THAP9-AS1	0.53527	1.09e-13	-0.29697	0.404702	-2.27398	0.022967	#ERROR!
HJURP	THAP9-AS1	0.715057	0	-0.00606	0.986743	-2.27354	0.022994	#ERROR!
CHM	THAP9-AS1	0.702917	0	-0.0303	0.933773	-2.27313	0.023019	#ERROR!
PARVA	THAP9-AS1	0.670747	0	-0.09091	0.802772	-2.27289	0.023033	#ERROR!
DTNA	THAP9-AS1	0.534855	1.15e-13	-0.29697	0.404702	-2.27252	0.023055	#ERROR!
NPC2	THAP9-AS1	0.635326	0	-0.15152	0.676065	-2.27221	0.023074	#ERROR!
GIHCG	THAP9-AS1	0.553315	1.07e-14	-0.27273	0.445838	-2.27212	0.023079	#ERROR!
ACTL6A	THAP9-AS1	0.726424	0	0.018182	0.96024	-2.27206	0.023083	#ERROR!
GPR87	THAP9-AS1	0.192648	0.012894	-0.60927	0.061509	-2.27185	0.023095	#ERROR!
HSPE1-MOB4	THAP9-AS1	0.696325	0	-0.04268	0.906799	-2.27183	0.023097	#ERROR!
RPL7P32	THAP9-AS1	0.572648	8.88e-16	-0.24618	0.492943	-2.27173	0.023103	#ERROR!
FMO2	THAP9-AS1	0.494869	1.23e-11	-0.34545	0.328227	-2.27163	0.023109	#ERROR!
NXT2	THAP9-AS1	0.635034	0	-0.15152	0.676065	-2.27097	0.023149	#ERROR!
RNF125	THAP9-AS1	0.626802	0	0.927273	0.000112	2.27083	0.023157	#ERROR!
RFK	THAP9-AS1	0.708501	0	-0.01818	0.96024	-2.2706	0.023171	#ERROR!
GUSBP1	THAP9-AS1	0.753591	0	0.078788	0.828717	-2.27038	0.023185	#ERROR!
PKD2	THAP9-AS1	0.670145	0	-0.09091	0.802772	-2.27014	0.023199	#ERROR!
MEMO1	THAP9-AS1	0.726033	0	0.018182	0.96024	-2.26998	0.023209	#ERROR!
RAB9B	THAP9-AS1	0.543502	3.84e-14	-0.28485	0.425038	-2.26988	0.023215	#ERROR!
RPL21P11	THAP9-AS1	0.656292	0	-0.11515	0.75142	-2.26956	0.023234	#ERROR!
RBPJ	THAP9-AS1	0.783543	0	0.151515	0.676065	-2.2692	0.023256	#ERROR!
GARNL3	THAP9-AS1	0.773724	0	0.127273	0.726057	-2.26864	0.02329	#ERROR!
DCUN1D5	THAP9-AS1	0.648927	0	-0.12727	0.726057	-2.26823	0.023315	#ERROR!
LINC01767	THAP9-AS1	0.410526	3.94e-08	-0.43427	0.209825	-2.26819	0.023318	#ERROR!
IFIT5	THAP9-AS1	0.634292	0	-0.15152	0.676065	-2.26784	0.023339	#ERROR!
RPL9P18	THAP9-AS1	0.472346	1.32e-10	-0.36927	0.293645	-2.26637	0.023429	#ERROR!
MYL12B	THAP9-AS1	0.655519	0	-0.11515	0.75142	-2.26614	0.023443	#ERROR!
ARMCX6	THAP9-AS1	0.662054	0	-0.10334	0.776334	-2.26513	0.023505	#ERROR!
BLVRA	THAP9-AS1	0.513177	1.56e-12	-0.32121	0.365468	-2.26476	0.023527	#ERROR!
CCDC126	THAP9-AS1	0.668766	0	-0.09091	0.802772	-2.26385	0.023583	#ERROR!
RNF25	THAP9-AS1	0.70104	0	-0.0303	0.933773	-2.26382	0.023585	#ERROR!
ENOX1	THAP9-AS1	0.532359	1.56e-13	-0.29697	0.404702	-2.26374	0.02359	#ERROR!
MYOM1	THAP9-AS1	0.559994	4.44e-15	-0.26061	0.467089	-2.26364	0.023596	#ERROR!
MSMO1	THAP9-AS1	0.747006	0	0.066667	0.854813	-2.26313	0.023628	#ERROR!
BDNF	THAP9-AS1	0.558679	5.33e-15	-0.2622	0.464269	-2.26313	0.023628	#ERROR!
LY6G6F-LY6G6D	THAP9-AS1	0.33283	1.18e-05	-0.50303	0.138334	-2.26308	0.023631	#ERROR!
PKNOX2-AS1	THAP9-AS1	0.039166	0.616371	-0.69631	0.025293	-2.2629	0.023642	0/-
G2E3	THAP9-AS1	0.718891	0	0.006079	0.986703	-2.26284	0.023645	#ERROR!
GLYATL2	THAP9-AS1	0.451926	9.85e-10	-0.39025	0.264887	-2.26271	0.023654	#ERROR!
PPM1L	THAP9-AS1	0.712891	0	-0.00606	0.986743	-2.26242	0.023672	#ERROR!
CDK1	THAP9-AS1	0.706752	0	-0.01818	0.96024	-2.26179	0.023711	#ERROR!
EFCAB1	THAP9-AS1	0.292605	0.00013	-0.53496	0.111088	-2.26085	0.023768	#ERROR!
POLR2C	THAP9-AS1	0.694051	0	-0.04242	0.907364	-2.2601	0.023815	#ERROR!
C12orf4	THAP9-AS1	0.67447	0	-0.07879	0.828717	-2.25927	0.023866	#ERROR!
ATG4C	THAP9-AS1	0.76205	0	0.10303	0.776998	-2.25887	0.023891	#ERROR!
GPR156	THAP9-AS1	0.511437	1.9e-12	-0.32121	0.365468	-2.25883	0.023894	#ERROR!
MARCHF2	THAP9-AS1	0.423642	1.29e-08	-0.41818	0.229113	-2.25867	0.023904	#ERROR!
GPN1	THAP9-AS1	0.712147	0	-0.00606	0.986743	-2.25861	0.023907	#ERROR!
RIOK2	THAP9-AS1	0.756691	0	0.090909	0.802772	-2.25781	0.023958	#ERROR!
DEPDC1B	THAP9-AS1	0.680685	0	-0.06667	0.854813	-2.25752	0.023975	#ERROR!
ERO1B	THAP9-AS1	0.660453	0	-0.10303	0.776998	-2.25717	0.023997	#ERROR!
HSBP1	THAP9-AS1	0.646358	0	-0.12727	0.726057	-2.2571	0.024002	#ERROR!
PRXL2C	THAP9-AS1	0.638919	0	-0.13939	0.700932	-2.25626	0.024054	#ERROR!
CYP3A4	THAP9-AS1	0.422663	1.41e-08	-0.41818	0.229113	-2.25567	0.024091	#ERROR!
PREX2	THAP9-AS1	0.6601	0	-0.10303	0.776998	-2.2556	0.024096	#ERROR!
DDR2	THAP9-AS1	0.539427	6.44e-14	-0.28485	0.425038	-2.25537	0.02411	#ERROR!
LIX1L-AS1	THAP9-AS1	0.517079	9.86e-13	-0.31265	0.379097	-2.25418	0.024185	#ERROR!
CDC73	THAP9-AS1	0.756057	0	0.090909	0.802772	-2.25408	0.024191	#ERROR!
FBXL2	THAP9-AS1	0.599734	0	-0.2	0.579584	-2.25327	0.024242	#ERROR!
EEF1GP3	THAP9-AS1	0.329893	1.42e-05	-0.50252	0.1388	-2.25306	0.024256	#ERROR!
COA8	THAP9-AS1	0.704992	0	-0.01818	0.96024	-2.25296	0.024262	#ERROR!
CTBS	THAP9-AS1	0.755821	0	0.090909	0.802772	-2.2527	0.024278	#ERROR!
CLEC4F	THAP9-AS1	0.370692	8.82e-07	-0.46667	0.173939	-2.25217	0.024312	#ERROR!
RMI1	THAP9-AS1	0.771081	0	0.127273	0.726057	-2.25216	0.024312	#ERROR!
FBXO32	THAP9-AS1	0.666187	0	-0.09091	0.802772	-2.25215	0.024313	#ERROR!
DDTL	THAP9-AS1	0.551729	1.33e-14	-0.26748	0.454986	-2.25213	0.024314	#ERROR!
KIAA0895	THAP9-AS1	0.58293	2.22e-16	-0.22424	0.533401	-2.25212	0.024314	#ERROR!
CERS5	THAP9-AS1	0.739553	0	0.054545	0.881036	-2.25184	0.024333	#ERROR!
CPA3	THAP9-AS1	0.299081	9.07e-05	-0.52727	0.117308	-2.25178	0.024336	#ERROR!
CIR1	THAP9-AS1	0.744951	0	0.066667	0.854813	-2.25147	0.024356	#ERROR!
GOLGA8S	THAP9-AS1	0.399775	9.5e-08	-0.43926	0.20404	-2.25134	0.024364	#ERROR!
LOC100133102	THAP9-AS1	0.034404	0.659906	-0.69631	0.025293	-2.2509	0.024392	0/-
DPH5	THAP9-AS1	0.733786	0	0.042424	0.907364	-2.25067	0.024406	#ERROR!
ITM2B	THAP9-AS1	0.679215	0	-0.06667	0.854813	-2.25065	0.024408	#ERROR!
CKAP2L	THAP9-AS1	0.72802	0	0.030303	0.933773	-2.25006	0.024445	#ERROR!
IL12A	THAP9-AS1	0.434677	4.87e-09	-0.40369	0.247317	-2.24882	0.024524	#ERROR!
MCFD2	THAP9-AS1	0.691586	0	-0.04242	0.907364	-2.24818	0.024565	#ERROR!
AP1AR	THAP9-AS1	0.825256	0	0.272727	0.445838	-2.24774	0.024592	#ERROR!
PAQR6	THAP9-AS1	0.572903	8.88e-16	-0.23636	0.510885	-2.24645	0.024675	#ERROR!
RPL30	THAP9-AS1	0.754743	0	0.090909	0.802772	-2.24638	0.02468	#ERROR!
NOTCH2NLA	THAP9-AS1	0.671518	0	-0.07903	0.828202	-2.2463	0.024685	#ERROR!
BOLA2P3	THAP9-AS1	0.089156	0.253331	0.753957	0.011768	2.24623	0.024689	0/+
CBX3P2	THAP9-AS1	0.671544	0	-0.07879	0.828717	-2.24582	0.024716	#ERROR!
HDAC4	THAP9-AS1	0.721374	0	0.018182	0.96024	-2.24536	0.024745	#ERROR!
ALKBH1	THAP9-AS1	0.715413	0	0.006061	0.986743	-2.24487	0.024777	#ERROR!
IHO1	THAP9-AS1	0.465253	2.69e-10	-0.3697	0.29305	-2.24472	0.024786	#ERROR!
ARR3	THAP9-AS1	0.709387	0	-0.0061	0.986662	-2.24467	0.024789	#ERROR!
DUXAP8	THAP9-AS1	0.324436	2e-05	-0.50456	0.136942	-2.24457	0.024796	#ERROR!
CEP55	THAP9-AS1	0.738207	0	0.054545	0.881036	-2.24437	0.024808	#ERROR!
NDUFB8	THAP9-AS1	0.684376	0	-0.05455	0.881036	-2.2443	0.024813	#ERROR!
NPIPB5	THAP9-AS1	-0.13561	0.081491	0.638301	0.047024	2.24394	0.024837	0/+
LOC105372440	THAP9-AS1	0.270922	0.000415	-0.54665	0.102027	-2.24318	0.024885	#ERROR!
APELA	THAP9-AS1	0.422022	1.49e-08	-0.41464	0.233486	-2.24293	0.024901	#ERROR!
RPL21P128	THAP9-AS1	0.608609	0	-0.18252	0.613775	-2.24279	0.024911	#ERROR!
AP1S3	THAP9-AS1	0.696744	0	-0.0303	0.933773	-2.24268	0.024917	#ERROR!
RPL7AP53	THAP9-AS1	0.475022	1e-10	-0.35809	0.309636	-2.2426	0.024922	#ERROR!
ATXN1	THAP9-AS1	0.74325	0	0.066667	0.854813	-2.24188	0.024969	#ERROR!
CWF19L2	THAP9-AS1	0.708837	0	-0.00606	0.986743	-2.24179	0.024975	#ERROR!
LAMTOR5	THAP9-AS1	0.714815	0	0.006061	0.986743	-2.24179	0.024975	#ERROR!
LINC01167	THAP9-AS1	-0.02258	0.772789	0.700477	0.024068	2.24158	0.024988	0/+
RNU6-762P	THAP9-AS1	0.741303	0	0.062531	0.863748	-2.24142	0.024999	#ERROR!
MFSD13A	THAP9-AS1	0.404344	6.56e-08	0.866667	0.001174	2.24128	0.025008	#ERROR!
APBB2	THAP9-AS1	0.708723	0	-0.00606	0.986743	-2.24122	0.025012	#ERROR!
RARS2	THAP9-AS1	0.708695	0	-0.00606	0.986743	-2.24108	0.025021	#ERROR!
CHIC1	THAP9-AS1	0.720476	0	0.018182	0.96024	-2.24066	0.025048	#ERROR!
EIF3CL	THAP9-AS1	0.696147	0	-0.03058	0.933164	-2.24047	0.02506	#ERROR!
LYRM9	THAP9-AS1	0.553591	1.02e-14	-0.26061	0.467089	-2.24028	0.025073	#ERROR!
JAM3	THAP9-AS1	0.596344	0	-0.2	0.579584	-2.23999	0.025091	#ERROR!
RNA5SP238	THAP9-AS1	0.030055	0.700684	-0.69631	0.025293	-2.23994	0.025095	0/-
RPL23	THAP9-AS1	0.714408	0	0.006061	0.986743	-2.2397	0.025111	#ERROR!
COP1	THAP9-AS1	0.758788	0	0.10303	0.776998	-2.23941	0.025129	#ERROR!
DDHD2	THAP9-AS1	0.748188	0	0.078788	0.828717	-2.23921	0.025143	#ERROR!
PRDX3	THAP9-AS1	0.634736	0	-0.13939	0.700932	-2.23855	0.025185	#ERROR!
C20orf194	THAP9-AS1	0.543946	3.64e-14	-0.27273	0.445838	-2.23839	0.025195	#ERROR!
RPL38	THAP9-AS1	0.611673	0	-0.17576	0.627188	-2.23749	0.025254	#ERROR!
C12orf65	THAP9-AS1	0.792917	0	0.187879	0.603218	-2.23727	0.025269	#ERROR!
GTF2H2	THAP9-AS1	0.648806	0	-0.11515	0.75142	-2.23675	0.025303	#ERROR!
PRKRA	THAP9-AS1	0.758437	0	0.103344	0.776334	-2.23653	0.025317	#ERROR!
HSPA13	THAP9-AS1	0.676132	0	-0.06667	0.854813	-2.2363	0.025332	#ERROR!
BLOC1S5	THAP9-AS1	0.731079	0	0.042553	0.907083	-2.23565	0.025375	#ERROR!
METTL18	THAP9-AS1	0.766028	0	0.121581	0.737938	-2.23564	0.025375	#ERROR!
CISD2	THAP9-AS1	0.801403	0	0.212121	0.556306	-2.2323	0.025595	#ERROR!
PCDHA9	THAP9-AS1	0.285751	0.00019	-0.53217	0.113321	-2.23222	0.0256	#ERROR!
RECQL	THAP9-AS1	0.633215	0	-0.13939	0.700932	-2.23216	0.025605	#ERROR!
NOC3L	THAP9-AS1	0.752263	0	0.090909	0.802772	-2.23194	0.025619	#ERROR!
MYOCD	THAP9-AS1	0.523207	4.76e-13	-0.29697	0.404702	-2.23182	0.025627	#ERROR!
LRRC40	THAP9-AS1	0.741389	0	0.066667	0.854813	-2.23145	0.025651	#ERROR!
PITHD1	THAP9-AS1	0.777622	0	0.151515	0.676065	-2.23106	0.025677	#ERROR!
DOCK3	THAP9-AS1	0.577324	4.44e-16	-0.22424	0.533401	-2.23086	0.02569	#ERROR!
LRRC8B	THAP9-AS1	0.805609	0	0.224242	0.533401	-2.23014	0.025738	#ERROR!
PIGBOS1	THAP9-AS1	0.718393	0	0.018182	0.96024	-2.22979	0.025761	#ERROR!
NAALAD2	THAP9-AS1	0.700304	0	-0.01818	0.96024	-2.22966	0.02577	#ERROR!
NUDT10	THAP9-AS1	0.449354	1.26e-09	-0.38182	0.276255	-2.22965	0.025771	#ERROR!
ID2	THAP9-AS1	0.647166	0	-0.11515	0.75142	-2.22964	0.025772	#ERROR!
CDH8	THAP9-AS1	0.567797	1.33e-15	-0.23708	0.509561	-2.22932	0.025792	#ERROR!
LOC100130760	THAP9-AS1	-0.08885	0.254993	0.662171	0.036979	2.22883	0.025825	0/+
FAM136A	THAP9-AS1	0.786937	0	0.175758	0.627188	-2.22878	0.025828	#ERROR!
RPL23AP87	THAP9-AS1	0.495406	1.16e-11	-0.32972	0.352169	-2.22873	0.025832	#ERROR!
PDLIM3	THAP9-AS1	0.401418	8.32e-08	-0.4303	0.214492	-2.22847	0.025849	#ERROR!
MBLAC2	THAP9-AS1	0.687409	0	-0.04242	0.907364	-2.22814	0.025871	#ERROR!
NSMCE1-DT	THAP9-AS1	0.604558	0	-0.18293	0.612964	-2.22773	0.025899	#ERROR!
ALDH3B2	THAP9-AS1	-0.01042	0.89397	0.703824	0.023114	2.2276	0.025907	0/+
FGFBP2	THAP9-AS1	0.386628	2.67e-07	-0.44377	0.198893	-2.2263	0.025994	#ERROR!
MZT1	THAP9-AS1	0.711792	0	0.006098	0.986662	-2.22621	0.026	#ERROR!
C3orf52	THAP9-AS1	0.734876	0	0.054545	0.881036	-2.22605	0.026011	#ERROR!
AMELY	THAP9-AS1	-0.02442	0.754821	0.696311	0.025293	2.22575	0.026031	0/+
RPAP3	THAP9-AS1	0.786472	0	0.175758	0.627188	-2.22572	0.026033	#ERROR!
GTF2H4	THAP9-AS1	0.809181	0	0.236364	0.510885	-2.22375	0.026165	#ERROR!
ARFIP1	THAP9-AS1	0.809161	0	0.236364	0.510885	-2.22361	0.026175	#ERROR!
NMUR2	THAP9-AS1	0.142981	0.066105	0.772911	0.008755	2.22329	0.026196	0/+
LINC02762	THAP9-AS1	0.530279	2.02e-13	-0.28485	0.425038	-2.22313	0.026207	#ERROR!
LOC101929141	THAP9-AS1	0.17392	0.025027	-0.60927	0.061509	-2.22309	0.02621	#ERROR!
PKD2L1	THAP9-AS1	0.435753	4.42e-09	-0.39394	0.259998	-2.22299	0.026216	#ERROR!
B4GALT6	THAP9-AS1	0.673121	0	-0.06667	0.854813	-2.22239	0.026257	#ERROR!
MRPS9-AS1	THAP9-AS1	0.711044	0	0.006116	0.986621	-2.22235	0.02626	#ERROR!
NEK9	THAP9-AS1	0.73411	0	0.054545	0.881036	-2.22187	0.026292	#ERROR!
CEP83	THAP9-AS1	0.821939	0	0.272727	0.445838	-2.2218	0.026297	#ERROR!
PDE4DIPP6	THAP9-AS1	0.722851	0	0.030677	0.932957	-2.22167	0.026306	#ERROR!
FNBP1	THAP9-AS1	0.638055	0	-0.12727	0.726057	-2.22154	0.026315	#ERROR!
RPL18P10	THAP9-AS1	0.061716	0.429585	0.737344	0.014951	2.22151	0.026317	0/+
PAPSS1	THAP9-AS1	0.760928	0	0.115152	0.75142	-2.22128	0.026332	#ERROR!
GRPEL2-AS1	THAP9-AS1	0.324625	1.98e-05	-0.49747	0.143461	-2.22126	0.026333	#ERROR!
ARL5B	THAP9-AS1	0.766041	0	0.127273	0.726057	-2.22117	0.026339	#ERROR!
KCP	THAP9-AS1	0.411116	3.75e-08	0.866667	0.001174	2.22084	0.026362	#ERROR!
LY96	THAP9-AS1	0.468597	1.93e-10	-0.35758	0.310376	-2.22033	0.026396	#ERROR!
RNU6-26P	THAP9-AS1	0.393574	1.56e-07	-0.43519	0.208749	-2.22017	0.026407	#ERROR!
DENND6A	THAP9-AS1	0.785594	0	0.175758	0.627188	-2.21993	0.026423	#ERROR!
RNA5SP527	THAP9-AS1	0.447674	1.47e-09	-0.38029	0.278343	-2.21986	0.026428	#ERROR!
NDUFB3	THAP9-AS1	0.728013	0	0.042424	0.907364	-2.21948	0.026454	#ERROR!
HESX1	THAP9-AS1	0.730802	0	0.048632	0.893868	-2.21883	0.026498	#ERROR!
KIF27	THAP9-AS1	0.799441	0	0.212121	0.556306	-2.21856	0.026516	#ERROR!
LNP1	THAP9-AS1	0.694861	0	-0.02432	0.94684	-2.21842	0.026526	#ERROR!
RBMS3	THAP9-AS1	0.614675	0	-0.16364	0.651477	-2.21819	0.026542	#ERROR!
GRPEL2	THAP9-AS1	0.744383	0	0.078788	0.828717	-2.2176	0.026582	#ERROR!
AMZ2	THAP9-AS1	0.651465	0	-0.10303	0.776998	-2.21747	0.026591	#ERROR!
HOMER2	THAP9-AS1	0.499185	7.62e-12	-0.32121	0.365468	-2.21742	0.026594	#ERROR!
FAM89A	THAP9-AS1	0.647646	0	-0.10942	0.763483	-2.21712	0.026615	#ERROR!
LINC00578	THAP9-AS1	0.467542	2.14e-10	-0.35758	0.310376	-2.21693	0.026628	#ERROR!
EAF2	THAP9-AS1	0.697648	0	-0.01818	0.96024	-2.21659	0.026651	#ERROR!
RPF1	THAP9-AS1	0.785026	0	0.175758	0.627188	-2.21621	0.026677	#ERROR!
NMRK2	THAP9-AS1	0.131881	0.090315	-0.63392	0.049046	-2.21587	0.026701	0/-
HAX1	THAP9-AS1	0.650952	0	-0.10303	0.776998	-2.21523	0.026744	#ERROR!
CCT6B	THAP9-AS1	0.576962	4.44e-16	-0.21885	0.543551	-2.21522	0.026745	#ERROR!
AMOTL1	THAP9-AS1	0.555583	7.99e-15	-0.24848	0.488776	-2.21491	0.026766	#ERROR!
CDK2AP1	THAP9-AS1	0.65083	0	-0.10303	0.776998	-2.2147	0.026781	#ERROR!
ANTXR2	THAP9-AS1	0.715475	0	0.018182	0.96024	-2.21468	0.026782	#ERROR!
EOGT	THAP9-AS1	0.703415	0	-0.00606	0.986743	-2.21458	0.026789	#ERROR!
JAZF1	THAP9-AS1	0.628807	0	-0.13939	0.700932	-2.21373	0.026848	#ERROR!
C1orf131	THAP9-AS1	0.774867	0	0.151515	0.676065	-2.21361	0.026856	#ERROR!
RNU6-1005P	THAP9-AS1	0.291322	0.00014	-0.52223	0.121503	-2.21289	0.026905	#ERROR!
C1orf216	THAP9-AS1	0.555001	8.44e-15	-0.24848	0.488776	-2.21279	0.026912	#ERROR!
CTNNA3	THAP9-AS1	0.511996	1.78e-12	-0.30395	0.393201	-2.2126	0.026925	#ERROR!
ERBB4	THAP9-AS1	0.33458	1.05e-05	-0.48632	0.15408	-2.21238	0.026941	#ERROR!
KRT10	THAP9-AS1	0.563684	2.66e-15	-0.23636	0.510885	-2.21218	0.026954	#ERROR!
OXSM	THAP9-AS1	0.743371	0	0.078788	0.828717	-2.21189	0.026974	#ERROR!
MRFAP1	THAP9-AS1	0.759308	0	0.115152	0.75142	-2.21162	0.026993	#ERROR!
N4BP2L2-IT2	THAP9-AS1	0.759106	0	0.115152	0.75142	-2.21043	0.027075	#ERROR!
RPL6	THAP9-AS1	0.779267	0	0.163636	0.651477	-2.21028	0.027086	#ERROR!
ARHGEF26	THAP9-AS1	0.6126	0	-0.16364	0.651477	-2.20981	0.027118	#ERROR!
PARP8	THAP9-AS1	0.683491	0	-0.04242	0.907364	-2.20954	0.027137	#ERROR!
RBMXL1	THAP9-AS1	0.76903	0	0.139394	0.700932	-2.20843	0.027215	#ERROR!
NUDT11	THAP9-AS1	0.475593	9.47e-11	-0.34545	0.328227	-2.20819	0.027231	#ERROR!
PLS3	THAP9-AS1	0.656349	0	-0.09091	0.802772	-2.20815	0.027234	#ERROR!
INPP5A	THAP9-AS1	0.695902	0	-0.01818	0.96024	-2.20805	0.027241	#ERROR!
RFESD	THAP9-AS1	0.689267	0	-0.03068	0.932957	-2.20743	0.027284	#ERROR!
CASP4	THAP9-AS1	0.596102	0	-0.18788	0.603218	-2.20735	0.027289	#ERROR!
IFT80	THAP9-AS1	0.806703	0	0.236364	0.510885	-2.20579	0.027399	#ERROR!
NR2C2AP	THAP9-AS1	0.719581	0	0.030303	0.933773	-2.20546	0.027422	#ERROR!
FGF2	THAP9-AS1	0.603627	0	-0.17576	0.627188	-2.20539	0.027427	#ERROR!
CCDC13-AS1	THAP9-AS1	0.565657	2e-15	-0.231	0.520792	-2.20521	0.02744	#ERROR!
CEBPB-AS1	THAP9-AS1	0.578835	4.44e-16	-0.21212	0.556306	-2.20454	0.027486	#ERROR!
RPL21P32	THAP9-AS1	0.557836	5.77e-15	-0.24154	0.501386	-2.20454	0.027486	#ERROR!
PURB	THAP9-AS1	0.725085	0	0.042424	0.907364	-2.20388	0.027533	#ERROR!
GIMAP7	THAP9-AS1	0.618813	0	-0.15152	0.676065	-2.20371	0.027544	#ERROR!
ACSF2	THAP9-AS1	0.37752	5.33e-07	0.854545	0.001637	2.20329	0.027574	#ERROR!
IQUB	THAP9-AS1	0.559439	4.66e-15	-0.23854	0.506881	-2.20239	0.027638	#ERROR!
LOC100505851	THAP9-AS1	0.301898	7.72e-05	-0.51064	0.131502	-2.20229	0.027645	#ERROR!
RIOK1	THAP9-AS1	0.78276	0	0.175758	0.627188	-2.20141	0.027707	#ERROR!
CCDC38	THAP9-AS1	0.474177	1.09e-10	-0.34466	0.32942	-2.20131	0.027714	#ERROR!
RNU4-25P	THAP9-AS1	0.286994	0.000178	-0.52223	0.121503	-2.201	0.027736	#ERROR!
CAMTA1	THAP9-AS1	0.762653	0	0.127273	0.726057	-2.20067	0.027759	#ERROR!
L3MBTL4-AS1	THAP9-AS1	0.404507	6.48e-08	-0.41818	0.229113	-2.20055	0.027768	#ERROR!
IGHJ3	THAP9-AS1	-0.29362	0.000123	0.51672	0.126197	2.2002	0.027793	-/0
NLRC4	THAP9-AS1	0.65438	0	-0.09091	0.802772	-2.19947	0.027845	#ERROR!
KRT42P	THAP9-AS1	0.096506	0.216132	0.749025	0.012657	2.19907	0.027873	0/+
GPR45	THAP9-AS1	0.237383	0.002074	-0.55926	0.092799	-2.19864	0.027904	#ERROR!
MROH2B	THAP9-AS1	0.166462	0.032074	-0.60791	0.062255	-2.1983	0.027928	#ERROR!
NDUFAF6	THAP9-AS1	0.751673	0	0.10303	0.776998	-2.19774	0.027968	#ERROR!
FOCAD-AS1	THAP9-AS1	0.410378	3.99e-08	-0.41138	0.237562	-2.19758	0.027979	#ERROR!
MOB2	THAP9-AS1	0.706057	0	0.006061	0.986743	-2.19729	0.028	#ERROR!
PDK4	THAP9-AS1	0.653853	0	-0.09091	0.802772	-2.19715	0.02801	#ERROR!
MAMDC2-AS1	THAP9-AS1	0.588585	0	-0.19513	0.589046	-2.19714	0.02801	#ERROR!
ARMT1	THAP9-AS1	0.711949	0	0.018182	0.96024	-2.1966	0.028049	#ERROR!
RBMX2	THAP9-AS1	0.680664	0	-0.04242	0.907364	-2.19624	0.028075	#ERROR!
GFAP	THAP9-AS1	0.318121	2.96e-05	-0.49543	0.145366	-2.19622	0.028076	#ERROR!
ASB3	THAP9-AS1	0.729346	0	0.054545	0.881036	-2.19606	0.028087	#ERROR!
PTGER1	THAP9-AS1	-0.46103	4.09e-10	0.357576	0.310376	2.19604	0.028089	-/0
FLJ46284	THAP9-AS1	0.693268	0	-0.01818	0.96024	-2.19525	0.028146	#ERROR!
MRTO4	THAP9-AS1	0.680407	0	-0.04242	0.907364	-2.19504	0.028161	#ERROR!
CIPC	THAP9-AS1	0.756493	0	0.115152	0.75142	-2.19498	0.028165	#ERROR!
METTL25	THAP9-AS1	0.71162	0	0.018182	0.96024	-2.19492	0.028169	#ERROR!
LMO3	THAP9-AS1	0.492254	1.63e-11	-0.32121	0.365468	-2.1943	0.028214	#ERROR!
CBWD1	THAP9-AS1	0.734646	0	0.066667	0.854813	-2.19418	0.028222	#ERROR!
GRAP	THAP9-AS1	0.686644	0	-0.0303	0.933773	-2.19395	0.028239	#ERROR!
GNAT3	THAP9-AS1	0.059241	0.448355	0.731126	0.016282	2.19381	0.028249	0/+
MAGEA11	THAP9-AS1	-0.09781	0.209952	0.649058	0.042297	2.19371	0.028256	0/+
MORF4L2	THAP9-AS1	0.723155	0	0.042424	0.907364	-2.19367	0.028259	#ERROR!
HNRNPA1P33	THAP9-AS1	0.567301	1.55e-15	-0.22424	0.533401	-2.19335	0.028282	#ERROR!
NDUFB6	THAP9-AS1	0.659906	0	-0.07879	0.828717	-2.19322	0.028292	#ERROR!
DCTN4	THAP9-AS1	0.725968	0	0.048632	0.893868	-2.19292	0.028313	#ERROR!
HILPDA	THAP9-AS1	0.592352	0	-0.18788	0.603218	-2.19277	0.028324	#ERROR!
ERLEC1	THAP9-AS1	0.698988	0	-0.00606	0.986743	-2.19267	0.028331	#ERROR!
PSMD9	THAP9-AS1	0.705095	0	0.006061	0.986743	-2.19247	0.028346	#ERROR!
EFHC1	THAP9-AS1	0.739859	0	0.078788	0.828717	-2.19226	0.028361	#ERROR!
LYRM2	THAP9-AS1	0.704912	0	0.006061	0.986743	-2.19156	0.028412	#ERROR!
DUSP3	THAP9-AS1	0.692484	0	-0.01818	0.96024	-2.19145	0.028419	#ERROR!
OR9A1P	THAP9-AS1	0.283465	0.000215	-0.52223	0.121503	-2.19134	0.028427	#ERROR!
PCP4	THAP9-AS1	0.321659	2.38e-05	-0.49091	0.149656	-2.19109	0.028445	#ERROR!
OTULINL	THAP9-AS1	0.685954	0	-0.0303	0.933773	-2.19067	0.028476	#ERROR!
KAT7P1	THAP9-AS1	-0.00693	0.92939	0.698094	0.024764	2.19046	0.028491	0/+
LOC402229	THAP9-AS1	-0.41317	3.16e-08	0.406181	0.244129	2.19035	0.028499	-/0
ARMCX1	THAP9-AS1	0.530362	2e-13	-0.27273	0.445838	-2.19034	0.028499	#ERROR!
GULP1	THAP9-AS1	0.50102	6.21e-12	-0.30909	0.384841	-2.18972	0.028545	#ERROR!
IFITM4P	THAP9-AS1	0.019416	0.803913	-0.69148	0.026767	-2.18969	0.028546	0/-
IPO5	THAP9-AS1	0.685703	0	-0.0303	0.933773	-2.18948	0.028562	#ERROR!
CCDC51	THAP9-AS1	0.691933	0	-0.01818	0.96024	-2.18879	0.028612	#ERROR!
RPL7P38	THAP9-AS1	0.399151	9.99e-08	-0.41952	0.227467	-2.18857	0.028628	#ERROR!
ILKAP	THAP9-AS1	0.750082	0	0.10303	0.776998	-2.18856	0.028629	#ERROR!
MEIS1	THAP9-AS1	0.48009	5.94e-11	-0.33333	0.346594	-2.18838	0.028642	#ERROR!
PPIL1	THAP9-AS1	0.565918	1.78e-15	-0.22424	0.533401	-2.18823	0.028653	#ERROR!
MMADHC-DT	THAP9-AS1	0.494642	1.26e-11	-0.31611	0.373561	-2.18796	0.028673	#ERROR!
IPO7	THAP9-AS1	0.744507	0	0.090909	0.802772	-2.18757	0.028701	#ERROR!
BACH1	THAP9-AS1	0.738891	0	0.078788	0.828717	-2.18689	0.028751	#ERROR!
CA11	THAP9-AS1	0.574093	6.66e-16	-0.21212	0.556306	-2.18668	0.028766	#ERROR!
DSCR9	THAP9-AS1	0.432191	6.08e-09	-0.38534	0.27148	-2.18643	0.028784	#ERROR!
RBM11	THAP9-AS1	0.514144	1.39e-12	-0.29179	0.413327	-2.18636	0.028789	#ERROR!
LOC105376171	THAP9-AS1	0.493361	1.44e-11	-0.31679	0.37248	-2.18559	0.028846	#ERROR!
ATP5PO	THAP9-AS1	0.66501	0	-0.06667	0.854813	-2.18544	0.028856	#ERROR!
MTMR9	THAP9-AS1	0.691235	0	-0.01818	0.96024	-2.18542	0.028858	#ERROR!
DEGS1	THAP9-AS1	0.644042	0	-0.10303	0.776998	-2.18529	0.028868	#ERROR!
ARHGEF10	THAP9-AS1	0.62187	0	-0.13939	0.700932	-2.18506	0.028885	#ERROR!
GTF3A	THAP9-AS1	0.519188	7.69e-13	-0.28485	0.425038	-2.18461	0.028917	#ERROR!
MIS12	THAP9-AS1	0.738474	0	0.078788	0.828717	-2.18458	0.02892	#ERROR!
BPIFA2	THAP9-AS1	0.020422	0.793966	0.710588	0.021266	2.18403	0.02896	0/+
LINC02120	THAP9-AS1	0.280654	0.00025	-0.52223	0.121503	-2.18365	0.028988	#ERROR!
RNU6-1016P	THAP9-AS1	0.681046	0	-0.0367	0.919829	-2.1836	0.028991	#ERROR!
KPNA3	THAP9-AS1	0.697103	0	-0.00606	0.986743	-2.18342	0.029005	#ERROR!
CD27-AS1	THAP9-AS1	0.709227	0	0.018182	0.96024	-2.18276	0.029053	#ERROR!
RNU6-1223P	THAP9-AS1	0.636885	0	-0.11396	0.753924	-2.18259	0.029066	#ERROR!
LURAP1	THAP9-AS1	0.498777	7.97e-12	-0.30909	0.384841	-2.18219	0.029095	#ERROR!
GET1	THAP9-AS1	0.708955	0	0.018182	0.96024	-2.18139	0.029155	#ERROR!
IFT81	THAP9-AS1	0.794012	0	0.212121	0.556306	-2.18115	0.029172	#ERROR!
PSPC1P1	THAP9-AS1	0.712126	0	0.024696	0.946011	-2.1811	0.029176	#ERROR!
GSTM3	THAP9-AS1	0.409908	4.15e-08	-0.40606	0.244282	-2.1801	0.02925	#ERROR!
RPL32	THAP9-AS1	0.656873	0	-0.07879	0.828717	-2.17975	0.029276	#ERROR!
APTR	THAP9-AS1	0.784228	0	0.187879	0.603218	-2.17944	0.029299	#ERROR!
LNPEP	THAP9-AS1	0.764202	0	0.139394	0.700932	-2.17896	0.029335	#ERROR!
EPHA3	THAP9-AS1	0.497733	8.94e-12	-0.30909	0.384841	-2.1787	0.029354	#ERROR!
CHUK	THAP9-AS1	0.731784	0	0.066667	0.854813	-2.17861	0.029361	#ERROR!
DNAL1	THAP9-AS1	0.731481	0	0.066667	0.854813	-2.17697	0.029483	#ERROR!
MRPL39	THAP9-AS1	0.66982	0	-0.05455	0.881036	-2.17666	0.029506	#ERROR!
C16orf87	THAP9-AS1	0.736984	0	0.078788	0.828717	-2.17635	0.029529	#ERROR!
PEX12	THAP9-AS1	0.669629	0	-0.05455	0.881036	-2.17579	0.029571	#ERROR!
MIR133A1HG	THAP9-AS1	0.465504	2.63e-10	-0.34545	0.328227	-2.17558	0.029587	#ERROR!
PSME2P4	THAP9-AS1	0.212398	0.006009	0.793293	0.006172	2.17554	0.02959	#ERROR!
MIR26B	THAP9-AS1	0.41911	1.91e-08	-0.3952	0.258334	-2.17552	0.029591	#ERROR!
LOC644456	THAP9-AS1	-0.29944	8.89e-05	0.504562	0.136942	2.17488	0.029639	-/0
GMPS	THAP9-AS1	0.763526	0	0.139394	0.700932	-2.17488	0.029639	#ERROR!
LINC01149	THAP9-AS1	0.337835	8.53e-06	-0.47194	0.16847	-2.17463	0.029658	#ERROR!
IDI1	THAP9-AS1	0.70752	0	0.018182	0.96024	-2.17414	0.029695	#ERROR!
RPL10AP12	THAP9-AS1	-0.62527	0	0.129652	0.721106	2.17408	0.029699	-/0
ATP5PF	THAP9-AS1	0.669196	0	-0.05455	0.881036	-2.17381	0.02972	#ERROR!
CADM2	THAP9-AS1	0.357022	2.34e-06	-0.45455	0.186905	-2.1738	0.02972	#ERROR!
HSP90AB2P	THAP9-AS1	0.587308	0	-0.18788	0.603218	-2.1733	0.029758	#ERROR!
GNG12-AS1	THAP9-AS1	0.725043	0	0.054545	0.881036	-2.17308	0.029774	#ERROR!
DNAJB5	THAP9-AS1	0.50571	3.66e-12	-0.29697	0.404702	-2.17194	0.02986	#ERROR!
KPNA1	THAP9-AS1	0.783017	0	0.187879	0.603218	-2.17154	0.02989	#ERROR!
MIR4436A	THAP9-AS1	-0.00591	0.939752	-0.70065	0.024019	-2.17073	0.029951	0/-
PARPBP	THAP9-AS1	0.688131	0	-0.01818	0.96024	-2.17053	0.029967	#ERROR!
MRPL36	THAP9-AS1	0.569701	1.11e-15	-0.21212	0.556306	-2.17025	0.029988	#ERROR!
DNAH12	THAP9-AS1	0.572608	8.88e-16	-0.20796	0.564256	-2.17016	0.029995	#ERROR!
EXOC5	THAP9-AS1	0.740959	0	0.090909	0.802772	-2.16766	0.030184	#ERROR!
IMPA1	THAP9-AS1	0.746404	0	0.10303	0.776998	-2.16752	0.030195	#ERROR!
RIT1	THAP9-AS1	0.718158	0	0.042424	0.907364	-2.16751	0.030196	#ERROR!
RIIAD1	THAP9-AS1	0.379507	4.59e-07	-0.43161	0.212945	-2.16746	0.0302	#ERROR!
NRAV	THAP9-AS1	0.712115	0	0.030303	0.933773	-2.16693	0.03024	#ERROR!
NLGN4Y-AS1	THAP9-AS1	0.050104	0.521477	0.72175	0.018443	2.16691	0.030242	0/+
LINC01778	THAP9-AS1	0.433903	5.22e-09	-0.3769	0.283003	-2.1669	0.030243	#ERROR!
APOH	THAP9-AS1	0.405283	6.08e-08	-0.40606	0.244282	-2.16615	0.0303	#ERROR!
RGPD2	THAP9-AS1	0.465951	2.51e-10	-0.34147	0.334208	-2.16565	0.030338	#ERROR!
RPA2	THAP9-AS1	0.705792	0	0.018182	0.96024	-2.16545	0.030353	#ERROR!
LOC100131785	THAP9-AS1	0.436926	3.97e-09	-0.3731	0.288275	-2.16516	0.030375	#ERROR!
H2AZ1	THAP9-AS1	0.68697	0	-0.01818	0.96024	-2.16499	0.030389	#ERROR!
MIR4748	THAP9-AS1	-5.13e-05	0.999477	0.696311	0.025293	2.16442	0.030432	0/+
DDIT4L	THAP9-AS1	0.340179	7.32e-06	-0.46667	0.173939	-2.16427	0.030443	#ERROR!
ATL3	THAP9-AS1	0.751211	0	0.115152	0.75142	-2.16419	0.03045	#ERROR!
POC5	THAP9-AS1	0.76175	0	0.139394	0.700932	-2.16419	0.03045	#ERROR!
EEF1A1P19	THAP9-AS1	0.568045	1.33e-15	-0.21212	0.556306	-2.16409	0.030457	#ERROR!
LOC100506098	THAP9-AS1	0.667029	0	-0.05455	0.881036	-2.16396	0.030467	#ERROR!
GSX2	THAP9-AS1	0.070514	0.366646	-0.65801	0.038613	-2.16386	0.030475	0/-
MIR7856	THAP9-AS1	0.490558	1.96e-11	-0.31209	0.379996	-2.16317	0.030528	#ERROR!
NDC80	THAP9-AS1	0.734519	0	0.078788	0.828717	-2.16282	0.030555	#ERROR!
MTND2P28	THAP9-AS1	0.600765	0	-0.16364	0.651477	-2.16269	0.030565	#ERROR!
OCIAD1	THAP9-AS1	0.76653	0	0.151515	0.676065	-2.16194	0.030623	#ERROR!
LINC02541	THAP9-AS1	0.575963	4.44e-16	-0.2	0.579584	-2.16185	0.03063	#ERROR!
MRPL40	THAP9-AS1	0.623653	0	-0.12727	0.726057	-2.16134	0.030669	#ERROR!
MED10	THAP9-AS1	0.666409	0	-0.05455	0.881036	-2.16115	0.030684	#ERROR!
DTNBP1	THAP9-AS1	0.716919	0	0.042424	0.907364	-2.16108	0.030689	#ERROR!
RNU6-534P	THAP9-AS1	0.373432	7.22e-07	-0.43519	0.208749	-2.16074	0.030715	#ERROR!
IL36B	THAP9-AS1	0.12096	0.120568	0.753123	0.011915	2.16045	0.030738	0/+
RNU6-1280P	THAP9-AS1	-0.07783	0.318916	0.652973	0.040658	2.16013	0.030762	0/+
DCST2	THAP9-AS1	0.439649	3.1e-09	0.869305	0.001087	2.16009	0.030766	#ERROR!
RNU6-1315P	THAP9-AS1	0.208001	0.007164	-0.5698	0.085504	-2.15979	0.030789	#ERROR!
RPL31P17	THAP9-AS1	0.441602	2.59e-09	-0.36586	0.298477	-2.15863	0.030879	#ERROR!
LONRF1	THAP9-AS1	0.704263	0	0.018182	0.96024	-2.15781	0.030943	#ERROR!
HDDC2	THAP9-AS1	0.691788	0	-0.00606	0.986743	-2.15758	0.03096	#ERROR!
AKAP10	THAP9-AS1	0.722029	0	0.054545	0.881036	-2.15717	0.030993	#ERROR!
POLR1D	THAP9-AS1	0.703983	0	0.018182	0.96024	-2.15641	0.031052	#ERROR!
AR	THAP9-AS1	0.529854	2.13e-13	-0.26061	0.467089	-2.15573	0.031105	#ERROR!
HSPE1	THAP9-AS1	0.73879	0	0.090909	0.802772	-2.1556	0.031115	#ERROR!
LOC100506178	THAP9-AS1	0.434841	4.8e-09	-0.37196	0.289877	-2.15534	0.031135	#ERROR!
MSRB3	THAP9-AS1	0.500712	6.43e-12	-0.29697	0.404702	-2.1551	0.031154	#ERROR!
RNA5SP515	THAP9-AS1	0.270096	0.000433	-0.52223	0.121503	-2.1549	0.031169	#ERROR!
ATP5MG	THAP9-AS1	0.697498	0	0.006061	0.986743	-2.15485	0.031174	#ERROR!
DNAJC25-GNG10	THAP9-AS1	0.270057	0.000434	-0.52223	0.121503	-2.1548	0.031178	#ERROR!
MIR3138	THAP9-AS1	0.292571	0.000131	0.820277	0.003652	2.15469	0.031186	#ERROR!
CATSPER1	THAP9-AS1	0.383785	3.32e-07	-0.42334	0.222818	-2.1546	0.031193	#ERROR!
FANCF	THAP9-AS1	0.765303	0	0.151515	0.676065	-2.15447	0.031203	#ERROR!
NIPSNAP3A	THAP9-AS1	0.703547	0	0.018182	0.96024	-2.15423	0.031222	#ERROR!
RPL7AP35	THAP9-AS1	0.313527	3.9e-05	-0.48656	0.153849	-2.15396	0.031243	#ERROR!
MED31	THAP9-AS1	0.598482	0	-0.16364	0.651477	-2.15371	0.031263	#ERROR!
CCT4	THAP9-AS1	0.684425	0	-0.01818	0.96024	-2.1529	0.031327	#ERROR!
LAMC1	THAP9-AS1	0.690652	0	-0.00606	0.986743	-2.15211	0.031389	#ERROR!
FDX1	THAP9-AS1	0.677717	0	-0.0303	0.933773	-2.15193	0.031403	#ERROR!
LOC730098	THAP9-AS1	0.620953	0	-0.12766	0.72525	-2.15124	0.031457	#ERROR!
IFT52	THAP9-AS1	0.613539	0	-0.13939	0.700932	-2.15116	0.031463	#ERROR!
GNAI3	THAP9-AS1	0.774903	0	0.175758	0.627188	-2.15116	0.031464	#ERROR!
RNF41	THAP9-AS1	0.720835	0	0.054545	0.881036	-2.1509	0.031484	#ERROR!
FGL2	THAP9-AS1	0.555744	7.77e-15	-0.22424	0.533401	-2.15088	0.031486	#ERROR!
PEG10	THAP9-AS1	0.468366	1.97e-10	-0.33333	0.346594	-2.15032	0.03153	#ERROR!
DNAJC18	THAP9-AS1	0.605454	0	-0.15152	0.676065	-2.14995	0.031559	#ERROR!
NLRP2B	THAP9-AS1	0.120658	0.121505	-0.62497	0.053355	-2.14987	0.031565	0/0
ERV3-1	THAP9-AS1	0.60536	0	-0.15152	0.676065	-2.14958	0.031589	#ERROR!
EPHX3	THAP9-AS1	0.155239	0.045812	0.765961	0.009787	2.14888	0.031644	#ERROR!
GCATP1	THAP9-AS1	0.217882	0.004803	0.791471	0.006377	2.14874	0.031655	#ERROR!
PTPN11	THAP9-AS1	0.753859	0	0.127273	0.726057	-2.14861	0.031666	#ERROR!
PLGRKT	THAP9-AS1	0.649776	0	-0.07879	0.828717	-2.14859	0.031667	#ERROR!
DIMT1	THAP9-AS1	0.751171	0	0.121581	0.737938	-2.14755	0.031749	#ERROR!
BAG2	THAP9-AS1	0.58043	2.22e-16	-0.18788	0.603218	-2.14704	0.03179	#ERROR!
KCNA5	THAP9-AS1	0.398733	1.03e-07	-0.40606	0.244282	-2.14649	0.031834	#ERROR!
RGS18	THAP9-AS1	0.487938	2.59e-11	-0.30909	0.384841	-2.14614	0.031862	#ERROR!
CHURC1	THAP9-AS1	0.7256	0	0.066667	0.854813	-2.14543	0.031919	#ERROR!
RPL27	THAP9-AS1	0.579978	2.22e-16	-0.18788	0.603218	-2.14533	0.031926	#ERROR!
LINC01676	THAP9-AS1	0.17573	0.023533	-0.5882	0.073681	-2.14511	0.031944	#ERROR!
CCNI	THAP9-AS1	0.731205	0	0.078788	0.828717	-2.14481	0.031968	#ERROR!
NSMCE3	THAP9-AS1	0.619244	0	-0.12727	0.726057	-2.14326	0.032092	#ERROR!
C8orf88	THAP9-AS1	0.455299	7.13e-10	-0.34545	0.328227	-2.14299	0.032114	#ERROR!
GBP1P1	THAP9-AS1	0.432837	5.74e-09	-0.3697	0.29305	-2.14253	0.032151	#ERROR!
NR1D2	THAP9-AS1	0.741952	0	0.10303	0.776998	-2.14242	0.03216	#ERROR!
CDKN3	THAP9-AS1	0.595388	0	-0.16364	0.651477	-2.14162	0.032224	#ERROR!
FAM220A	THAP9-AS1	0.694788	0	0.006061	0.986743	-2.14162	0.032224	#ERROR!
PLAAT5	THAP9-AS1	0.516208	1.09e-12	-0.27273	0.445838	-2.1413	0.03225	#ERROR!
GATM	THAP9-AS1	0.409074	4.45e-08	-0.39394	0.259998	-2.14127	0.032252	#ERROR!
FAM229B	THAP9-AS1	0.443573	2.16e-09	-0.35758	0.310376	-2.14082	0.032289	#ERROR!
CDHR1	THAP9-AS1	0.398616	1.04e-07	0.854545	0.001637	2.14079	0.032291	#ERROR!
ALKBH3-AS1	THAP9-AS1	0.547915	2.18e-14	-0.231	0.520792	-2.1405	0.032315	#ERROR!
COA4	THAP9-AS1	0.688201	0	-0.00606	0.986743	-2.14036	0.032326	#ERROR!
HAT1	THAP9-AS1	0.724584	0	0.066667	0.854813	-2.14004	0.032352	#ERROR!
BCDIN3D	THAP9-AS1	0.735948	0	0.090909	0.802772	-2.13993	0.032361	#ERROR!
INSIG2	THAP9-AS1	0.762885	0	0.151515	0.676065	-2.13985	0.032367	#ERROR!
AK6	THAP9-AS1	0.787854	0	0.212121	0.556306	-2.13977	0.032373	#ERROR!
RPL35AP17	THAP9-AS1	-0.26447	0.000575	0.522233	0.121503	2.13967	0.032381	-/0
RPL15	THAP9-AS1	0.70671	0	0.030303	0.933773	-2.13954	0.032392	#ERROR!
LINGO2	THAP9-AS1	0.413117	3.17e-08	-0.38906	0.266478	-2.13901	0.032435	#ERROR!
JCAD	THAP9-AS1	0.569831	1.11e-15	-0.2	0.579584	-2.13888	0.032445	#ERROR!
GNAL	THAP9-AS1	0.586503	0	-0.17576	0.627188	-2.13867	0.032463	#ERROR!
LINC01289	THAP9-AS1	0.226702	0.003313	-0.55048	0.099165	-2.13832	0.032491	#ERROR!
NBEA	THAP9-AS1	0.543326	3.93e-14	-0.23636	0.510885	-2.13832	0.032491	#ERROR!
GGT1	THAP9-AS1	0.259811	0.000724	0.806061	0.004862	2.1383	0.032493	#ERROR!
GJD3	THAP9-AS1	-0.50675	3.25e-12	0.283221	0.427805	2.13769	0.032542	-/0
LINC00682	THAP9-AS1	0.190991	0.013706	-0.57576	0.081553	-2.13751	0.032557	#ERROR!
PABPC5	THAP9-AS1	0.528715	2.44e-13	-0.25532	0.476493	-2.1375	0.032557	#ERROR!
MND1	THAP9-AS1	0.724087	0	0.066667	0.854813	-2.13741	0.032565	#ERROR!
PLEKHO1	THAP9-AS1	0.474786	1.03e-10	-0.32121	0.365468	-2.13693	0.032604	#ERROR!
FAXC	THAP9-AS1	0.419426	1.86e-08	-0.38182	0.276255	-2.13681	0.032613	#ERROR!
PLCL1	THAP9-AS1	0.617571	0	-0.12727	0.726057	-2.13644	0.032643	#ERROR!
ANKRD44-IT1	THAP9-AS1	0.219244	0.004539	-0.5552	0.09571	-2.13567	0.032707	#ERROR!
ANKRA2	THAP9-AS1	0.740721	0	0.10303	0.776998	-2.13554	0.032717	#ERROR!
RPL21P17	THAP9-AS1	0.440301	2.92e-09	-0.35922	0.307999	-2.13533	0.032734	#ERROR!
PSORS1C1	THAP9-AS1	0.65372	0	-0.06667	0.854813	-2.13518	0.032747	#ERROR!
AKT3	THAP9-AS1	0.51438	1.35e-12	-0.27273	0.445838	-2.13503	0.032758	#ERROR!
ARL6IP1	THAP9-AS1	0.767154	0	0.163636	0.651477	-2.13448	0.032804	#ERROR!
BHMT	THAP9-AS1	0.348463	4.21e-06	-0.44985	0.192076	-2.13435	0.032814	#ERROR!
DCTN5	THAP9-AS1	0.723479	0	0.066667	0.854813	-2.13419	0.032827	#ERROR!
MSTN	THAP9-AS1	0.430106	7.32e-09	-0.3697	0.29305	-2.13409	0.032836	#ERROR!
ABT1	THAP9-AS1	0.631748	0	-0.10334	0.776334	-2.13392	0.032849	#ERROR!
LRRD1	THAP9-AS1	0.526591	3.17e-13	-0.2566	0.474207	-2.13354	0.03288	#ERROR!
PPFIBP1	THAP9-AS1	0.699363	0	0.018182	0.96024	-2.13351	0.032883	#ERROR!
CAB39L	THAP9-AS1	0.451956	9.82e-10	-0.34545	0.328227	-2.1324	0.032974	#ERROR!
CENPA	THAP9-AS1	0.659833	0	-0.05455	0.881036	-2.13162	0.033038	#ERROR!
NUDCD1	THAP9-AS1	0.75093	0	0.127273	0.726057	-2.13162	0.033038	#ERROR!
POLR3K	THAP9-AS1	0.623838	0	-0.11515	0.75142	-2.13114	0.033078	#ERROR!
MOSPD2	THAP9-AS1	0.698838	0	0.018182	0.96024	-2.13092	0.033095	#ERROR!
EMCN	THAP9-AS1	0.592634	0	-0.16364	0.651477	-2.13091	0.033096	#ERROR!
RPL30P3	THAP9-AS1	-0.26115	0.000678	0.522233	0.121503	2.13068	0.033116	-/0
RGS9	THAP9-AS1	0.513079	1.57e-12	-0.27273	0.445838	-2.13058	0.033123	#ERROR!
FBXL13	THAP9-AS1	0.689156	0	0	1	-2.12968	0.033198	#ERROR!
COMMD10	THAP9-AS1	0.608066	0	-0.13939	0.700932	-2.12919	0.033238	#ERROR!
PLA2G3	THAP9-AS1	0.018482	0.813166	0.698611	0.024612	2.12905	0.03325	0/+
OPTC	THAP9-AS1	0.336655	9.21e-06	-0.45873	0.182361	-2.12886	0.033266	#ERROR!
PMPCB	THAP9-AS1	0.728211	0	0.078788	0.828717	-2.12869	0.03328	#ERROR!
ACTL7B	THAP9-AS1	0.06435	0.410119	0.721284	0.018556	2.12849	0.033296	0/+
ETAA1	THAP9-AS1	0.77622	0	0.187879	0.603218	-2.12793	0.033343	#ERROR!
RNU6-12P	THAP9-AS1	0.136868	0.078682	-0.60927	0.061509	-2.12753	0.033376	0/0
PDE5A	THAP9-AS1	0.695019	0	0.012158	0.973408	-2.1274	0.033387	#ERROR!
RPL9P7	THAP9-AS1	0.644878	0	-0.07879	0.828717	-2.12738	0.033389	#ERROR!
GRM4	THAP9-AS1	0.100073	0.199552	0.737819	0.014852	2.12696	0.033424	0/+
LINC01990	THAP9-AS1	0.376912	5.58e-07	-0.42074	0.225982	-2.1264	0.03347	#ERROR!
MST1	THAP9-AS1	0.523625	4.53e-13	0.890909	0.000542	2.12628	0.03348	#ERROR!
OMA1	THAP9-AS1	0.800035	0	0.248485	0.488776	-2.12607	0.033498	#ERROR!
ARHGAP29	THAP9-AS1	0.630031	0	-0.10303	0.776998	-2.12595	0.033508	#ERROR!
EEF1A1P4	THAP9-AS1	0.574723	4.44e-16	-0.18788	0.603218	-2.12549	0.033545	#ERROR!
PIGK	THAP9-AS1	0.715933	0	0.054545	0.881036	-2.12541	0.033553	#ERROR!
DLEU1	THAP9-AS1	0.749812	0	0.127273	0.726057	-2.12518	0.033572	#ERROR!
DAW1	THAP9-AS1	0.174409	0.024616	-0.58387	0.076359	-2.12511	0.033578	#ERROR!
ABCC9	THAP9-AS1	0.55745	6.22e-15	-0.21212	0.556306	-2.12507	0.033581	#ERROR!
LOC645266	THAP9-AS1	0.289571	0.000154	-0.49747	0.143461	-2.12386	0.033682	#ERROR!
EEF1A1P17	THAP9-AS1	0.395967	1.29e-07	-0.40122	0.250496	-2.12366	0.033698	#ERROR!
JAKMIP2	THAP9-AS1	0.582463	2.22e-16	-0.17576	0.627188	-2.12323	0.033735	#ERROR!
CASQ1	THAP9-AS1	0.42655	1e-08	-0.3697	0.29305	-2.12313	0.033743	#ERROR!
CCNG1	THAP9-AS1	0.697237	0	0.018182	0.96024	-2.12306	0.033749	#ERROR!
ANXA8	THAP9-AS1	0.37037	9.03e-07	-0.42588	0.219764	-2.12303	0.033751	#ERROR!
PBX1	THAP9-AS1	0.664593	0	-0.04242	0.907364	-2.12238	0.033806	#ERROR!
PMAIP1	THAP9-AS1	0.650737	0	-0.06667	0.854813	-2.12211	0.033828	#ERROR!
DNAJA1	THAP9-AS1	0.721058	0	0.066667	0.854813	-2.12146	0.033883	#ERROR!
LINC00645	THAP9-AS1	0.25771	0.000802	-0.52223	0.121503	-2.1214	0.033888	#ERROR!
HADHAP1	THAP9-AS1	-0.08437	0.279834	0.640076	0.046221	2.12093	0.033928	0/+
PSIP1	THAP9-AS1	0.7379	0	0.10303	0.776998	-2.11989	0.034015	#ERROR!
NDUFC2	THAP9-AS1	0.696509	0	0.018182	0.96024	-2.1195	0.034048	#ERROR!
CTDSPL2	THAP9-AS1	0.726449	0	0.078788	0.828717	-2.11928	0.034067	#ERROR!
PGM5	THAP9-AS1	0.49993	7.01e-12	-0.28485	0.425038	-2.11915	0.034078	#ERROR!
FHL1	THAP9-AS1	0.489919	2.1e-11	-0.29697	0.404702	-2.11911	0.034081	#ERROR!
RNF130	THAP9-AS1	0.635701	0	-0.09091	0.802772	-2.11896	0.034094	#ERROR!
RBPMS	THAP9-AS1	0.564441	2.22e-15	-0.2	0.579584	-2.11889	0.0341	#ERROR!
ICE2	THAP9-AS1	0.754013	0	0.139394	0.700932	-2.11845	0.034137	#ERROR!
C22orf39	THAP9-AS1	0.546675	2.55e-14	-0.22424	0.533401	-2.1181	0.034167	#ERROR!
NKAIN4	THAP9-AS1	0.327541	1.65e-05	-0.46342	0.177354	-2.11807	0.034169	#ERROR!
PARD3B	THAP9-AS1	0.726212	0	0.078788	0.828717	-2.11802	0.034174	#ERROR!
MACF1	THAP9-AS1	0.737513	0	0.10303	0.776998	-2.11775	0.034196	#ERROR!
MIR6129	THAP9-AS1	0.25634	0.000857	-0.52223	0.121503	-2.11771	0.034199	#ERROR!
RNFT1	THAP9-AS1	0.676902	0	-0.01818	0.96024	-2.11763	0.034207	#ERROR!
RPL7AP47	THAP9-AS1	0.562264	3.11e-15	-0.20247	0.574813	-2.11734	0.034231	#ERROR!
LINC01715	THAP9-AS1	0.500807	6.36e-12	-0.28311	0.427993	-2.11734	0.034231	#ERROR!
MIR5188	THAP9-AS1	0.40647	5.51e-08	-0.38838	0.267383	-2.1169	0.034268	#ERROR!
EEF1B2	THAP9-AS1	0.612735	0	-0.12727	0.726057	-2.11687	0.034271	#ERROR!
EPHA6	THAP9-AS1	0.37629	5.84e-07	-0.41818	0.229113	-2.11677	0.034279	#ERROR!
DMGDH	THAP9-AS1	0.546229	2.71e-14	-0.22424	0.533401	-2.1165	0.034302	#ERROR!
CREBRF	THAP9-AS1	0.731562	0	0.090909	0.802772	-2.11602	0.034343	#ERROR!
RPL7AP70	THAP9-AS1	0.634979	0	-0.09091	0.802772	-2.11591	0.034352	#ERROR!
C2orf74	THAP9-AS1	0.549965	1.67e-14	-0.21885	0.543551	-2.11566	0.034374	#ERROR!
PCDHB10	THAP9-AS1	0.634662	0	-0.09119	0.802181	-2.11528	0.034406	#ERROR!
DEXI	THAP9-AS1	0.708179	0	0.042948	0.906224	-2.11508	0.034423	#ERROR!
NAA50	THAP9-AS1	0.763946	0	0.163636	0.651477	-2.11497	0.034432	#ERROR!
LINC01376	THAP9-AS1	0.676287	0	-0.01824	0.960119	-2.11491	0.034438	#ERROR!
PPP2CA	THAP9-AS1	0.747958	0	0.127273	0.726057	-2.11456	0.034468	#ERROR!
MCUB	THAP9-AS1	0.545625	2.93e-14	-0.22424	0.533401	-2.11433	0.034487	#ERROR!
GRK4	THAP9-AS1	0.604231	0	-0.13939	0.700932	-2.11394	0.03452	#ERROR!
NKAPP1	THAP9-AS1	0.672698	0	-0.02432	0.94684	-2.11365	0.034545	#ERROR!
KLHL21	THAP9-AS1	0.562964	2.89e-15	-0.2	0.579584	-2.11344	0.034563	#ERROR!
DMAC2L	THAP9-AS1	0.747751	0	0.127273	0.726057	-2.11337	0.034569	#ERROR!
RPL21P29	THAP9-AS1	0.598592	0	-0.14771	0.683843	-2.11307	0.034594	#ERROR!
REST	THAP9-AS1	0.793444	0	0.236364	0.510885	-2.11305	0.034596	#ERROR!
C12orf56	THAP9-AS1	0.187678	0.015463	-0.57143	0.084412	-2.11264	0.034632	#ERROR!
PITPNA-AS1	THAP9-AS1	0.662026	0	-0.04242	0.907364	-2.11084	0.034786	#ERROR!
ACTN1	THAP9-AS1	0.618883	0	-0.11515	0.75142	-2.11083	0.034787	#ERROR!
PLN	THAP9-AS1	0.516739	1.03e-12	-0.26061	0.467089	-2.11028	0.034834	#ERROR!
LOC101927752	THAP9-AS1	0.570588	8.88e-16	-0.18788	0.603218	-2.11001	0.034857	#ERROR!
ITPKB	THAP9-AS1	0.668428	0	-0.0303	0.933773	-2.1092	0.034928	#ERROR!
HSPA8P8	THAP9-AS1	-0.22542	0.003499	0.543303	0.104572	2.10916	0.034931	-/0
PPIAL4A	THAP9-AS1	0.29112	0.000142	-0.49171	0.14889	-2.10893	0.03495	#ERROR!
NIPSNAP2	THAP9-AS1	0.561623	3.55e-15	-0.2	0.579584	-2.10851	0.034987	#ERROR!
KLHL5	THAP9-AS1	0.578454	4.44e-16	-0.17576	0.627188	-2.10801	0.03503	#ERROR!
HMMR	THAP9-AS1	0.668155	0	-0.0303	0.933773	-2.10796	0.035035	#ERROR!
NAA15	THAP9-AS1	0.824465	0	0.321212	0.365468	-2.10768	0.035059	#ERROR!
EEF1G	THAP9-AS1	0.709534	0	0.048632	0.893868	-2.1076	0.035066	#ERROR!
NOP16	THAP9-AS1	0.746545	0	0.127273	0.726057	-2.1065	0.035161	#ERROR!
FAM138B	THAP9-AS1	0.250267	0.001146	-0.52367	0.120296	-2.10637	0.035173	#ERROR!
DKK2	THAP9-AS1	0.319595	2.7e-05	-0.46667	0.173939	-2.10615	0.035191	#ERROR!
IL11RA	THAP9-AS1	0.617605	0	-0.11515	0.75142	-2.10563	0.035237	#ERROR!
PGAM4	THAP9-AS1	0.294378	0.000118	-0.48774	0.152708	-2.10475	0.035313	#ERROR!
LGALS9C	THAP9-AS1	0.181123	0.019526	0.769697	0.009222	2.10475	0.035313	#ERROR!
MRPL40P1	THAP9-AS1	0.381476	3.96e-07	-0.40919	0.240314	-2.10471	0.035317	#ERROR!
EIF2A	THAP9-AS1	0.756975	0	0.151515	0.676065	-2.10465	0.035322	#ERROR!
MOGAT2	THAP9-AS1	0.152933	0.049171	0.757576	0.011143	2.10454	0.035331	#ERROR!
N4BP2L1	THAP9-AS1	0.617313	0	-0.11515	0.75142	-2.10444	0.03534	#ERROR!
RPL23AP42	THAP9-AS1	0.667236	0	-0.0303	0.933773	-2.10378	0.035397	#ERROR!
CAVIN2	THAP9-AS1	0.609311	0	-0.12727	0.726057	-2.10311	0.035456	#ERROR!
PRIM1	THAP9-AS1	0.653348	0	-0.05455	0.881036	-2.10293	0.035472	#ERROR!
RPL7P23	THAP9-AS1	0.726412	0	0.085367	0.814614	-2.10242	0.035517	#ERROR!
RNF115	THAP9-AS1	0.761852	0	0.163636	0.651477	-2.10236	0.035521	#ERROR!
ORMDL1	THAP9-AS1	0.810417	0	0.284848	0.425038	-2.10186	0.035565	#ERROR!
BTBD17	THAP9-AS1	-0.00649	0.933823	0.679729	0.030593	2.10139	0.035607	0/+
PDZRN4	THAP9-AS1	0.407651	5e-08	-0.38182	0.276255	-2.10107	0.035635	#ERROR!
DCSTAMP	THAP9-AS1	0.357487	2.26e-06	-0.43082	0.213881	-2.10088	0.035651	#ERROR!
RPL23AP37	THAP9-AS1	0.399303	9.87e-08	-0.39022	0.264936	-2.10081	0.035658	#ERROR!
NEIL3	THAP9-AS1	0.692619	0	0.018182	0.96024	-2.10059	0.035677	#ERROR!
NAA16	THAP9-AS1	0.761449	0	0.163636	0.651477	-2.09995	0.035733	#ERROR!
PPP3CA	THAP9-AS1	0.786656	0	0.224242	0.533401	-2.09981	0.035745	#ERROR!
PAXBP1-AS1	THAP9-AS1	0.716892	0	0.066667	0.854813	-2.09975	0.03575	#ERROR!
PSMD12	THAP9-AS1	0.73982	0	0.115152	0.75142	-2.09966	0.035759	#ERROR!
ATAD1	THAP9-AS1	0.800869	0	0.260606	0.467089	-2.09929	0.035791	#ERROR!
CCDC110	THAP9-AS1	0.608302	0	-0.12727	0.726057	-2.09908	0.03581	#ERROR!
LAMB4	THAP9-AS1	0.423768	1.28e-08	-0.36426	0.300756	-2.09877	0.035837	#ERROR!
EIF5B	THAP9-AS1	0.728143	0	0.090909	0.802772	-2.09761	0.03594	#ERROR!
OR2A14	THAP9-AS1	0.253122	0.001001	0.797724	0.005692	2.09754	0.035945	#ERROR!
LINC01624	THAP9-AS1	0.18403	0.017622	0.769697	0.009222	2.09718	0.035978	#ERROR!
RFC3	THAP9-AS1	0.688747	0	0.012158	0.973408	-2.09712	0.035983	#ERROR!
C19orf33	THAP9-AS1	0.630434	0	-0.09091	0.802772	-2.09684	0.036008	#ERROR!
MED8	THAP9-AS1	0.74482	0	0.127273	0.726057	-2.09673	0.036018	#ERROR!
LOC100287896	THAP9-AS1	0.698028	0	0.030303	0.933773	-2.09643	0.036044	#ERROR!
CYP4A22	THAP9-AS1	0.248365	0.001253	-0.52223	0.121503	-2.09628	0.036057	#ERROR!
ANKRD50	THAP9-AS1	0.750161	0	0.139394	0.700932	-2.09613	0.036071	#ERROR!
MIB2	THAP9-AS1	0.156234	0.044422	0.757576	0.011143	2.09603	0.036079	#ERROR!
LOC105369980	THAP9-AS1	0.183571	0.017912	-0.5698	0.085504	-2.09586	0.036095	#ERROR!
MDFIC	THAP9-AS1	0.599633	0	-0.13939	0.700932	-2.0958	0.0361	#ERROR!
CXCL10	THAP9-AS1	0.301721	7.8e-05	-0.47879	0.161523	-2.09565	0.036114	#ERROR!
DCTD	THAP9-AS1	0.771063	0	0.187879	0.603218	-2.09561	0.036117	#ERROR!
BRF2	THAP9-AS1	0.591582	0	-0.15152	0.676065	-2.09556	0.036122	#ERROR!
MIR3136	THAP9-AS1	0.217572	0.004865	-0.54495	0.103316	-2.09427	0.036236	#ERROR!
LOC100129573	THAP9-AS1	0.069491	0.373658	0.717167	0.019569	2.09404	0.036256	0/+
GPX8	THAP9-AS1	0.539897	6.08e-14	-0.22424	0.533401	-2.0939	0.036269	#ERROR!
CDK14	THAP9-AS1	0.502196	5.44e-12	-0.27273	0.445838	-2.09369	0.036287	#ERROR!
PHKG1	THAP9-AS1	0.599091	0	-0.13939	0.700932	-2.09366	0.03629	#ERROR!
NTAN1P2	THAP9-AS1	0.590944	0	-0.15152	0.676065	-2.09309	0.036341	#ERROR!
GPHA2	THAP9-AS1	0.3176	3.05e-05	-0.4643	0.176431	-2.09295	0.036354	#ERROR!
LINC02458	THAP9-AS1	0.335106	1.02e-05	-0.44877	0.193272	-2.09291	0.036358	#ERROR!
ACTN4P1	THAP9-AS1	-0.55275	1.15e-14	0.206351	0.567342	2.0928	0.036367	-/0
PLA2G7	THAP9-AS1	0.47152	1.43e-10	-0.30909	0.384841	-2.09248	0.036396	#ERROR!
FAM114A2	THAP9-AS1	0.715309	0	0.066667	0.854813	-2.09158	0.036476	#ERROR!
PJA2	THAP9-AS1	0.703037	0	0.042424	0.907364	-2.09064	0.036561	#ERROR!
ERICH6-AS1	THAP9-AS1	0.601966	0	-0.13374	0.712622	-2.09048	0.036575	#ERROR!
PDE8B	THAP9-AS1	0.71494	0	0.066667	0.854813	-2.08968	0.036647	#ERROR!
MIR623	THAP9-AS1	0.25771	0.000802	0.798199	0.005642	2.08848	0.036755	#ERROR!
RPL34P5	THAP9-AS1	-0.59468	0	0.14382	0.69182	2.08779	0.036817	-/0
CCDC169-SOHLH2	THAP9-AS1	0.185385	0.016792	-0.56622	0.08794	-2.08728	0.036863	#ERROR!
IMP3	THAP9-AS1	0.670225	0	-0.01818	0.96024	-2.08687	0.0369	#ERROR!
MIR4744	THAP9-AS1	0.244788	0.00148	-0.52223	0.121503	-2.0867	0.036915	#ERROR!
AMN1	THAP9-AS1	0.605084	0	-0.12727	0.726057	-2.08627	0.036954	#ERROR!
FREM3	THAP9-AS1	0.333699	1.12e-05	-0.44789	0.194263	-2.08612	0.036968	#ERROR!
NAP1L3	THAP9-AS1	0.490016	2.07e-11	-0.28485	0.425038	-2.08611	0.036969	#ERROR!
IKBIP	THAP9-AS1	0.635179	0	-0.07879	0.828717	-2.08603	0.036976	#ERROR!
RPL17P36	THAP9-AS1	0.604981	0	-0.12727	0.726057	-2.08586	0.036991	#ERROR!
PMF1-BGLAP	THAP9-AS1	0.679824	0	0	1	-2.08549	0.037025	#ERROR!
MAT2B	THAP9-AS1	0.701979	0	0.042424	0.907364	-2.08538	0.037035	#ERROR!
COPG2	THAP9-AS1	0.731558	0	0.10303	0.776998	-2.08521	0.037051	#ERROR!
LINC00624	THAP9-AS1	0.672944	0	-0.01239	0.972908	-2.08475	0.037092	#ERROR!
NIT2	THAP9-AS1	0.748158	0	0.139394	0.700932	-2.08464	0.037102	#ERROR!
DOC2A	THAP9-AS1	0.279612	0.000264	0.806061	0.004862	2.08456	0.037109	#ERROR!
PINX1	THAP9-AS1	0.641889	0	-0.06687	0.854375	-2.08439	0.037125	#ERROR!
C2orf69	THAP9-AS1	0.76407	0	0.175758	0.627188	-2.08431	0.037132	#ERROR!
JAGN1	THAP9-AS1	0.701757	0	0.042424	0.907364	-2.08428	0.037135	#ERROR!
GBX2	THAP9-AS1	0.346962	4.66e-06	-0.43519	0.208749	-2.0842	0.037142	#ERROR!
MIR3936	THAP9-AS1	0.588607	0	-0.15152	0.676065	-2.08407	0.037154	#ERROR!
PTGES3L-AARSD1	THAP9-AS1	0.710881	0	0.060791	0.867511	-2.08375	0.037183	#ERROR!
INTS4P2	THAP9-AS1	0.662674	0	-0.03049	0.933369	-2.08367	0.03719	#ERROR!
CHAC2	THAP9-AS1	0.604425	0	-0.12727	0.726057	-2.08365	0.037192	#ERROR!
GNPAT	THAP9-AS1	0.781965	0	0.218846	0.543551	-2.08342	0.037213	#ERROR!
RNU6-623P	THAP9-AS1	0.423082	1.36e-08	-0.35957	0.307485	-2.0831	0.037242	#ERROR!
RAP2C-AS1	THAP9-AS1	0.655759	0	-0.04242	0.907364	-2.08297	0.037254	#ERROR!
RPA3	THAP9-AS1	0.596169	0	-0.13939	0.700932	-2.08223	0.037322	#ERROR!
POU3F2	THAP9-AS1	-0.19305	0.012704	0.559365	0.092724	2.08203	0.03734	-/0
PMS2P3	THAP9-AS1	0.753048	0	0.151515	0.676065	-2.08167	0.037373	#ERROR!
ATP5PB	THAP9-AS1	0.700972	0	0.042424	0.907364	-2.08039	0.03749	#ERROR!
KIF11	THAP9-AS1	0.761021	0	0.170214	0.638259	-2.08036	0.037492	#ERROR!
MIR3680-1	THAP9-AS1	0.384537	3.14e-07	-0.3979	0.254804	-2.0798	0.037544	#ERROR!
C4orf45	THAP9-AS1	0.392093	1.75e-07	-0.39022	0.264936	-2.07929	0.03759	#ERROR!
IL20RB	THAP9-AS1	0.544406	3.42e-14	-0.21212	0.556306	-2.07794	0.037715	#ERROR!
HBP1	THAP9-AS1	0.674871	0	-0.00606	0.986743	-2.07771	0.037736	#ERROR!
CYRIA	THAP9-AS1	0.525954	3.42e-13	-0.23636	0.510885	-2.0771	0.037792	#ERROR!
LPAR3	THAP9-AS1	0.2511	0.001102	0.793939	0.0061	2.077	0.037801	#ERROR!
RNU6-182P	THAP9-AS1	0.241125	0.001751	-0.52223	0.121503	-2.0769	0.037811	#ERROR!
LOC100130691	THAP9-AS1	0.75222	0	0.151515	0.676065	-2.07686	0.037814	#ERROR!
RBM8A	THAP9-AS1	0.74678	0	0.139394	0.700932	-2.07678	0.037821	#ERROR!
PWP1	THAP9-AS1	0.746647	0	0.139394	0.700932	-2.07603	0.037891	#ERROR!
PIK3C2A	THAP9-AS1	0.754918	0	0.158055	0.662762	-2.07571	0.037921	#ERROR!
KCTD16	THAP9-AS1	0.278107	0.000286	-0.4924	0.14823	-2.0756	0.037931	#ERROR!
PDF	THAP9-AS1	-0.44484	1.92e-09	0.333333	0.346594	2.07551	0.037939	-/0
FKBP5	THAP9-AS1	0.712127	0	0.066667	0.854813	-2.07526	0.037962	#ERROR!
DNAAF2	THAP9-AS1	0.706067	0	0.054545	0.881036	-2.0752	0.037968	#ERROR!
COX7A2	THAP9-AS1	0.602264	0	-0.12727	0.726057	-2.0751	0.037977	#ERROR!
RPL9P32	THAP9-AS1	0.523091	4.83e-13	-0.23928	0.505525	-2.07495	0.037991	#ERROR!
NDE1	THAP9-AS1	0.78283	0	0.224242	0.533401	-2.07476	0.038009	#ERROR!
CYP2U1	THAP9-AS1	0.632493	0	-0.07879	0.828717	-2.07473	0.038011	#ERROR!
RIBC1	THAP9-AS1	0.561051	3.77e-15	-0.18788	0.603218	-2.07471	0.038013	#ERROR!
GNL2	THAP9-AS1	0.837391	0	0.369697	0.29305	-2.07421	0.03806	#ERROR!
RPL11	THAP9-AS1	0.767578	0	0.187879	0.603218	-2.07412	0.038068	#ERROR!
DCAF8	THAP9-AS1	0.815681	0	0.309091	0.384841	-2.07404	0.038076	#ERROR!
NPTN-IT1	THAP9-AS1	0.609647	0	-0.11515	0.75142	-2.07351	0.038125	#ERROR!
DNAJC25	THAP9-AS1	0.797119	0	0.260606	0.467089	-2.0732	0.038154	#ERROR!
ELSPBP1	THAP9-AS1	0.176441	0.022967	-0.56854	0.086361	-2.0726	0.03821	#ERROR!
GNAI1	THAP9-AS1	0.617045	0	-0.10303	0.776998	-2.07248	0.038221	#ERROR!
LOC105369921	THAP9-AS1	0.249833	0.00117	-0.51407	0.128491	-2.07215	0.038252	#ERROR!
PTPN4	THAP9-AS1	0.772278	0	0.2	0.579584	-2.07147	0.038315	#ERROR!
PPP1CB	THAP9-AS1	0.723185	0	0.090909	0.802772	-2.07126	0.038335	#ERROR!
ATP2C2-AS1	THAP9-AS1	0.498526	8.19e-12	0.878788	0.000814	2.07112	0.038347	#ERROR!
LINC00278	THAP9-AS1	0.15579	0.045038	0.753123	0.011915	2.07109	0.03835	#ERROR!
CYCS	THAP9-AS1	0.71123	0	0.066667	0.854813	-2.07068	0.038388	#ERROR!
DHX36	THAP9-AS1	0.761673	0	0.175758	0.627188	-2.06989	0.038463	#ERROR!
C12orf43	THAP9-AS1	0.745564	0	0.139394	0.700932	-2.06988	0.038463	#ERROR!
DOK6	THAP9-AS1	0.584866	0	-0.15152	0.676065	-2.06972	0.038479	#ERROR!
GABPB2	THAP9-AS1	0.771939	0	0.951515	2.28e-05	2.06954	0.038495	#ERROR!
PPP1R12C	THAP9-AS1	0.666277	0	-0.01818	0.96024	-2.06892	0.038554	#ERROR!
COA7	THAP9-AS1	0.786808	0	0.236364	0.510885	-2.06861	0.038583	#ERROR!
PASD1	THAP9-AS1	0.215257	0.00535	-0.53936	0.10762	-2.06824	0.038618	#ERROR!
CNOT8	THAP9-AS1	0.716655	0	0.078788	0.828717	-2.06787	0.038653	#ERROR!
DYNLT2B	THAP9-AS1	0.484357	3.8e-11	-0.28485	0.425038	-2.06744	0.038693	#ERROR!
CPED1	THAP9-AS1	0.494333	1.3e-11	-0.27273	0.445838	-2.06737	0.038699	#ERROR!
PDE4DIPP4	THAP9-AS1	0.237499	0.002063	-0.52223	0.121503	-2.06722	0.038713	#ERROR!
BCHE	THAP9-AS1	0.504078	4.41e-12	-0.26061	0.467089	-2.0672	0.038716	#ERROR!
RPL5P34	THAP9-AS1	0.592251	0	-0.13939	0.700932	-2.06699	0.038735	#ERROR!
ENKUR	THAP9-AS1	0.536319	9.55e-14	-0.21885	0.543551	-2.06695	0.038739	#ERROR!
MRPL15	THAP9-AS1	0.659008	0	-0.0303	0.933773	-2.06683	0.03875	#ERROR!
EPHA7	THAP9-AS1	0.452824	9.04e-10	-0.32121	0.365468	-2.06651	0.03878	#ERROR!
NFU1	THAP9-AS1	0.623107	0	-0.09091	0.802772	-2.06647	0.038784	#ERROR!
LINC01623	THAP9-AS1	0.237156	0.002095	-0.52223	0.121503	-2.06631	0.038799	#ERROR!
C17orf75	THAP9-AS1	0.691797	0	0.030303	0.933773	-2.0661	0.038819	#ERROR!
C14orf119	THAP9-AS1	0.665643	0	-0.01818	0.96024	-2.06606	0.038823	#ERROR!
LINC01123	THAP9-AS1	0.755709	0	0.163636	0.651477	-2.06593	0.038835	#ERROR!
PET100	THAP9-AS1	0.727795	0	0.10303	0.776998	-2.06495	0.038927	#ERROR!
KYAT3	THAP9-AS1	0.755521	0	0.163636	0.651477	-2.06482	0.03894	#ERROR!
HLF	THAP9-AS1	0.562191	3.11e-15	-0.18237	0.614068	-2.06455	0.038965	#ERROR!
CEP57	THAP9-AS1	0.750083	0	0.151515	0.676065	-2.06452	0.038968	#ERROR!
RPS10P10	THAP9-AS1	0.149562	0.05445	-0.58479	0.075787	-2.0644	0.03898	0/0
POPDC2	THAP9-AS1	0.512832	1.62e-12	-0.24848	0.488776	-2.06429	0.03899	#ERROR!
MTND2P13	THAP9-AS1	0.236271	0.002179	-0.52223	0.121503	-2.06395	0.039023	#ERROR!
ARHGEF3	THAP9-AS1	0.709886	0	0.066667	0.854813	-2.06385	0.039032	#ERROR!
ARIH2	THAP9-AS1	0.805112	0	0.284848	0.425038	-2.06344	0.039071	#ERROR!
CDH19	THAP9-AS1	0.357881	2.2e-06	-0.41818	0.229113	-2.06323	0.039091	#ERROR!
KBTBD8	THAP9-AS1	0.622177	0	-0.09091	0.802772	-2.06265	0.039146	#ERROR!
CFAP300	THAP9-AS1	0.516395	1.07e-12	-0.24316	0.498434	-2.06223	0.039186	#ERROR!
CYP3A52P	THAP9-AS1	0.235249	0.002281	-0.52223	0.121503	-2.06123	0.039282	#ERROR!
RPAIN	THAP9-AS1	0.74944	0	0.151515	0.676065	-2.06083	0.039319	#ERROR!
ISL1	THAP9-AS1	0.451004	1.08e-09	-0.32121	0.365468	-2.06076	0.039326	#ERROR!
GUCY1A2	THAP9-AS1	0.565674	2e-15	-0.17576	0.627188	-2.06021	0.039379	#ERROR!
RN7SL566P	THAP9-AS1	0.591266	0	-0.13801	0.703781	-2.05963	0.039434	#ERROR!
PROX1-AS1	THAP9-AS1	0.598063	0	-0.12766	0.72525	-2.05957	0.03944	#ERROR!
CCDC28A	THAP9-AS1	0.743707	0	0.139394	0.700932	-2.05939	0.039457	#ERROR!
ARHGAP12	THAP9-AS1	0.785382	0	0.236364	0.510885	-2.05921	0.039474	#ERROR!
KMO	THAP9-AS1	0.491756	1.72e-11	-0.27273	0.445838	-2.0588	0.039513	#ERROR!
PCDHB15	THAP9-AS1	0.581938	2.22e-16	-0.15152	0.676065	-2.05855	0.039538	#ERROR!
NAPB	THAP9-AS1	0.732296	0	0.115152	0.75142	-2.05834	0.039558	#ERROR!
PRNP	THAP9-AS1	0.529792	2.14e-13	-0.22424	0.533401	-2.05829	0.039563	#ERROR!
DDX3X	THAP9-AS1	0.743447	0	0.139394	0.700932	-2.05793	0.039596	#ERROR!
CCT2	THAP9-AS1	0.714662	0	0.078788	0.828717	-2.05758	0.03963	#ERROR!
HLA-L	THAP9-AS1	-0.27319	0.000369	0.490909	0.149656	2.05725	0.039662	-/0
OSBPL9P1	THAP9-AS1	-0.08762	0.261611	0.622799	0.054439	2.05687	0.039698	0/0
[truncated: 18,396 more rows]

## Sheet: STAD
Gene1	Gene2	TCGA_STAD.PrimarySolidTumor_cor	TCGA_STAD.PrimarySolidTumor_pVal	TCGA_STAD.SolidTissueNormal_cor	TCGA_STAD.SolidTissueNormal_pVal	zScoreDiff	pValDiff	Classes
SMTNL2	THAP9-AS1	-0.12457	0.015796	0.791564	6.86e-08	6.04957	1.45e-09	-/+
SESN3	THAP9-AS1	0.065412	0.206296	0.841642	1.59e-09	5.85032	4.91e-09	0/+
HOXD9	THAP9-AS1	-0.01346	0.79509	0.813165	1.55e-08	5.79231	6.94e-09	0/+
MAFB	THAP9-AS1	-0.08258	0.110388	0.780425	1.38e-07	5.68885	1.28e-08	0/+
TENM2	THAP9-AS1	-0.17808	0.000531	0.72544	2.63e-06	5.53675	3.08e-08	-/+
GAL3ST4	THAP9-AS1	-0.08478	0.101179	0.7629	3.85e-07	5.48167	4.21e-08	0/+
TNFAIP8L3	THAP9-AS1	-0.12228	0.017836	0.745601	9.75e-07	5.47048	4.49e-08	-/+
FZD7	THAP9-AS1	-0.09461	0.067225	0.756232	5.56e-07	5.45222	4.97e-08	0/+
TRMT9B	THAP9-AS1	0.176131	0.000612	0.846351	1.05e-09	5.36613	8.04e-08	#ERROR!
RNLS	THAP9-AS1	-0.17458	0.000685	0.709441	5.47e-06	5.35241	8.68e-08	-/+
LPAR6	THAP9-AS1	0.19354	0.000163	0.847218	9.67e-10	5.29076	1.22e-07	#ERROR!
GALNT17	THAP9-AS1	-0.13278	0.010052	0.723974	2.82e-06	5.28728	1.24e-07	-/+
SERPINE2	THAP9-AS1	-0.06731	0.19341	0.752452	6.81e-07	5.26956	1.37e-07	0/+
FAM126A	THAP9-AS1	0.146608	0.004442	0.831012	3.91e-09	5.25813	1.46e-07	#ERROR!
TACR1	THAP9-AS1	-0.10417	0.043792	0.733272	1.81e-06	5.24099	1.6e-07	-/+
MACROH2A2	THAP9-AS1	-0.09323	0.071345	0.73717	1.49e-06	5.22805	1.71e-07	0/+
ALDH1A3	THAP9-AS1	-0.06152	0.234657	0.750733	7.46e-07	5.22037	1.79e-07	0/+
LOC101929331	THAP9-AS1	-0.11766	0.022684	0.724255	2.79e-06	5.21287	1.86e-07	-/+
ACKR2	THAP9-AS1	-0.00863	0.867679	0.772094	2.27e-07	5.20976	1.89e-07	0/+
FMO2	THAP9-AS1	-0.10038	0.052094	0.732038	1.92e-06	5.20828	1.91e-07	0/+
SLC9A9	THAP9-AS1	-0.10697	0.038412	0.728006	2.33e-06	5.1983	2.01e-07	-/+
SPESP1	THAP9-AS1	-0.07293	0.158724	0.741522	1.2e-06	5.1734	2.3e-07	0/+
FLJ22447	THAP9-AS1	0.079978	0.122084	0.800625	3.76e-08	5.13963	2.75e-07	0/+
SYT15	THAP9-AS1	-0.05032	0.331143	0.747341	8.91e-07	5.12485	2.98e-07	0/+
SERPINF2	THAP9-AS1	-0.11036	0.032639	0.718372	3.66e-06	5.11384	3.16e-07	-/+
GGTA1	THAP9-AS1	-0.14084	0.006296	0.702713	7.32e-06	5.11052	3.21e-07	-/+
RHNO1	THAP9-AS1	0.226289	9.65e-06	0.846119	1.07e-09	5.09858	3.42e-07	#ERROR!
OXTR	THAP9-AS1	0.128803	0.012548	0.813538	1.51e-08	5.07755	3.82e-07	#ERROR!
PPP1R3C	THAP9-AS1	-0.13529	0.008712	0.698011	8.94e-06	5.0355	4.77e-07	-/+
STUM	THAP9-AS1	-0.16081	0.001783	0.684018	1.59e-05	5.03204	4.85e-07	-/+
RNF135	THAP9-AS1	0.180275	0.000451	0.827713	5.11e-09	5.03061	4.89e-07	#ERROR!
LOC105374618	THAP9-AS1	-0.17915	0.00049	0.672477	2.49e-05	5.0195	5.18e-07	-/+
FAS	THAP9-AS1	0.16412	0.001427	0.821481	8.33e-09	5.01638	5.27e-07	#ERROR!
PPP1R3D	THAP9-AS1	0.243016	1.92e-06	0.844208	1.27e-09	4.97571	6.5e-07	#ERROR!
IRX1	THAP9-AS1	-0.0767	0.138222	0.719721	3.44e-06	4.95681	7.17e-07	0/+
MYRF-AS1	THAP9-AS1	0.280539	3.28e-08	-0.60001	0.000284	-4.94427	7.64e-07	#ERROR!
MAP3K7CL	THAP9-AS1	0.231614	5.84e-06	0.838728	2.05e-09	4.942	7.73e-07	#ERROR!
MDFIC	THAP9-AS1	0.073795	0.15381	0.783358	1.15e-07	4.93747	7.91e-07	0/+
PTHLH	THAP9-AS1	-0.02171	0.675138	0.743035	1.11e-06	4.93174	8.15e-07	0/+
CYP7B1	THAP9-AS1	-0.07438	0.150569	0.716891	3.91e-06	4.91561	8.85e-07	0/+
RASSF9	THAP9-AS1	0.037223	0.472344	0.766749	3.1e-07	4.91266	8.98e-07	0/+
IFI16	THAP9-AS1	0.216898	2.27e-05	0.830645	4.03e-09	4.88578	1.03e-06	#ERROR!
IL34	THAP9-AS1	-0.20111	8.8e-05	0.641004	7.73e-05	4.85529	1.2e-06	-/+
DDIT4L	THAP9-AS1	-0.09416	0.068551	0.699762	8.31e-06	4.84276	1.28e-06	0/+
FHL5	THAP9-AS1	0.026077	0.614703	0.756232	5.56e-07	4.84274	1.28e-06	0/+
ARID5B	THAP9-AS1	0.189206	0.000229	0.816716	1.19e-08	4.81296	1.49e-06	#ERROR!
FLRT2	THAP9-AS1	-0.11421	0.027001	0.684018	1.59e-05	4.79269	1.65e-06	-/+
SRRM3	THAP9-AS1	-0.05896	0.254706	0.712073	4.86e-06	4.78801	1.68e-06	0/+
KRT222	THAP9-AS1	-0.05336	0.302738	0.713605	4.54e-06	4.77538	1.79e-06	0/+
LOC101928489	THAP9-AS1	-0.0083	0.872726	0.734717	1.69e-06	4.77186	1.83e-06	0/+
BNIP3P30	THAP9-AS1	-0.03335	0.519638	0.721726	3.13e-06	4.75877	1.95e-06	0/+
CHFR	THAP9-AS1	0.050501	0.329412	0.759531	4.64e-07	4.75856	1.95e-06	0/+
ST8SIA6	THAP9-AS1	-0.20131	8.65e-05	0.62767	0.00012	4.74393	2.1e-06	-/+
KCNJ5	THAP9-AS1	-0.22412	1.18e-05	0.612395	0.000195	4.73926	2.14e-06	-/+
GDF7	THAP9-AS1	-0.04932	0.340878	0.711575	4.97e-06	4.7342	2.2e-06	0/+
TMEM108	THAP9-AS1	-0.01596	0.757998	0.72624	2.54e-06	4.71889	2.37e-06	0/+
ARL2BP	THAP9-AS1	-0.07513	0.146464	0.695381	9.99e-06	4.70322	2.56e-06	0/+
FAM43A	THAP9-AS1	0.006995	0.8926	0.734604	1.7e-06	4.69357	2.68e-06	0/+
CLEC2B	THAP9-AS1	0.085918	0.096649	0.767595	2.95e-07	4.67672	2.91e-06	0/+
NT5C1A	THAP9-AS1	-0.16769	0.001116	0.640367	7.9e-05	4.67556	2.93e-06	-/+
PRDM6	THAP9-AS1	-0.03087	0.551153	0.713958	4.47e-06	4.66554	3.08e-06	0/+
TGM5	THAP9-AS1	0.023134	0.655196	0.739405	1.34e-06	4.66518	3.08e-06	0/+
TSHZ2	THAP9-AS1	-0.01259	0.808075	0.722507	3.02e-06	4.66231	3.13e-06	0/+
AADACL2	THAP9-AS1	-0.01639	0.751715	0.720459	3.32e-06	4.65996	3.16e-06	0/+
INKA1	THAP9-AS1	-0.17522	0.000654	0.633914	9.81e-05	4.65991	3.16e-06	-/+
FAM181B	THAP9-AS1	-0.22423	1.17e-05	0.601283	0.000273	4.65126	3.3e-06	-/+
CTTNBP2	THAP9-AS1	-0.04541	0.380559	0.704545	6.77e-06	4.64344	3.43e-06	0/+
ACKR1	THAP9-AS1	-0.19738	0.000119	0.617302	0.000168	4.63805	3.52e-06	-/+
RRAD	THAP9-AS1	-0.12282	0.017342	0.661595	3.74e-05	4.63021	3.65e-06	-/+
HERPUD2	THAP9-AS1	0.322858	1.52e-10	0.84934	7.96e-10	4.62951	3.67e-06	#ERROR!
FAM13C	THAP9-AS1	-0.08527	0.099205	0.681697	1.74e-05	4.62351	3.77e-06	0/+
LINC01239	THAP9-AS1	0.106547	0.039184	0.770839	2.45e-07	4.61185	3.99e-06	#ERROR!
CLEC4G	THAP9-AS1	-0.16077	0.001788	0.636823	8.9e-05	4.60959	4.03e-06	-/+
LRRK2	THAP9-AS1	-0.01794	0.729209	0.714809	4.3e-06	4.60906	4.04e-06	0/+
TSPAN10	THAP9-AS1	-0.04938	0.340284	0.698762	8.67e-06	4.60609	4.1e-06	0/+
CRTAC1	THAP9-AS1	-0.18256	0.00038	0.622605	0.000142	4.604	4.14e-06	-/+
ENOX2	THAP9-AS1	0.362443	4.39e-13	0.860049	2.84e-10	4.60379	4.15e-06	#ERROR!
CYP4Z1	THAP9-AS1	0.245368	1.51e-06	0.82211	7.93e-09	4.59862	4.25e-06	#ERROR!
TNFAIP2	THAP9-AS1	0.219849	1.74e-05	0.81195	1.7e-08	4.58056	4.64e-06	#ERROR!
DSE	THAP9-AS1	0.093977	0.069093	0.762603	3.91e-07	4.57513	4.76e-06	0/+
CBR3	THAP9-AS1	0.021197	0.682431	0.730089	2.11e-06	4.57295	4.81e-06	0/+
TRIM6	THAP9-AS1	0.032771	0.526955	0.735405	1.63e-06	4.57242	4.82e-06	0/+
PALMD	THAP9-AS1	-0.00583	0.910483	0.716642	3.96e-06	4.56698	4.95e-06	0/+
PSTPIP2	THAP9-AS1	0.160855	0.001779	0.788856	8.17e-08	4.56496	5e-06	#ERROR!
AGFG2	THAP9-AS1	-0.03137	0.544793	0.703446	7.1e-06	4.56162	5.08e-06	0/+
CNTNAP3	THAP9-AS1	0.096304	0.062458	0.761687	4.12e-07	4.55229	5.31e-06	0/+
CORIN	THAP9-AS1	0.082193	0.112052	0.755572	5.76e-07	4.55138	5.33e-06	0/+
TAF1B	THAP9-AS1	0.373811	7.02e-14	0.860678	2.66e-10	4.54973	5.37e-06	#ERROR!
PRRX1	THAP9-AS1	0.078732	0.128031	0.753299	6.51e-07	4.54235	5.56e-06	0/+
FBXO27	THAP9-AS1	-0.11499	0.025961	0.656035	4.57e-05	4.54074	5.61e-06	-/+
GM2A	THAP9-AS1	-0.00401	0.938359	0.711877	4.91e-06	4.5088	6.52e-06	0/+
PPP2R2B	THAP9-AS1	-0.14081	0.00631	0.636664	8.95e-05	4.5053	6.63e-06	-/+
SPHK1	THAP9-AS1	0.118385	0.021852	0.766862	3.08e-07	4.50244	6.72e-06	#ERROR!
MTSS1	THAP9-AS1	0.073713	0.154265	0.747434	8.86e-07	4.50015	6.79e-06	0/+
SAMHD1	THAP9-AS1	0.028622	0.58059	0.72654	2.5e-06	4.49744	6.88e-06	0/+
GPNMB	THAP9-AS1	-0.03958	0.444714	0.692449	1.13e-05	4.49502	6.96e-06	0/+
RASL12	THAP9-AS1	-0.11473	0.026307	0.65066	5.53e-05	4.49215	7.05e-06	-/+
TDRD10	THAP9-AS1	-0.07916	0.125987	0.670577	2.67e-05	4.48929	7.15e-06	0/+
PRKCH	THAP9-AS1	0.107429	0.037578	0.760997	4.28e-07	4.48739	7.21e-06	#ERROR!
SH3BP5	THAP9-AS1	-0.10196	0.048491	0.657258	4.38e-05	4.48514	7.29e-06	-/+
AOX1	THAP9-AS1	-0.08451	0.102245	0.667033	3.06e-05	4.48417	7.32e-06	0/+
PLB1	THAP9-AS1	-0.03435	0.507182	0.693859	1.06e-05	4.48231	7.38e-06	0/+
FANCB	THAP9-AS1	0.433322	0	0.87484	5.89e-11	4.48048	7.45e-06	#ERROR!
LOC101927751	THAP9-AS1	0.209807	4.22e-05	0.80088	3.7e-08	4.47408	7.67e-06	#ERROR!
BCL11A	THAP9-AS1	-0.00277	0.957321	0.708578	5.68e-06	4.46905	7.86e-06	0/+
NTRK2	THAP9-AS1	-0.02543	0.623481	0.697095	9.3e-06	4.4689	7.86e-06	0/+
ABLIM3	THAP9-AS1	0.026258	0.612243	0.722507	3.02e-06	4.46659	7.95e-06	0/+
NR3C1	THAP9-AS1	0.04424	0.392964	0.729472	2.17e-06	4.45008	8.58e-06	0/+
FGD5P1	THAP9-AS1	-0.00795	0.878122	0.70316	7.18e-06	4.44071	8.97e-06	0/+
HPCAL4	THAP9-AS1	-0.11475	0.026279	0.644546	6.85e-05	4.43921	9.03e-06	-/+
SCARA3	THAP9-AS1	-0.12791	0.013182	0.635997	9.15e-05	4.43348	9.27e-06	-/+
FHOD3	THAP9-AS1	-0.05144	0.320493	0.679619	1.89e-05	4.43275	9.3e-06	0/+
LINC00519	THAP9-AS1	-0.02102	0.684959	0.695477	9.95e-06	4.43083	9.39e-06	0/+
EVC2	THAP9-AS1	-0.08658	0.094084	0.659028	4.1e-05	4.42271	9.75e-06	0/+
LMO2	THAP9-AS1	-0.01095	0.832666	0.69978	8.3e-06	4.42231	9.77e-06	0/+
LOC102724488	THAP9-AS1	-0.09409	0.068764	0.653645	4.98e-05	4.41318	1.02e-05	0/+
L3MBTL4	THAP9-AS1	-0.04299	0.406432	0.681393	1.76e-05	4.40677	1.05e-05	0/+
SORCS2	THAP9-AS1	-0.09208	0.074927	0.654019	4.91e-05	4.40625	1.05e-05	0/+
SWAP70	THAP9-AS1	0.251907	7.74e-07	0.811584	1.74e-08	4.40411	1.06e-05	#ERROR!
DOC2B	THAP9-AS1	-0.06315	0.222453	0.670088	2.72e-05	4.40377	1.06e-05	0/+
CHRDL1	THAP9-AS1	-0.16647	0.001214	0.607277	0.000228	4.39619	1.1e-05	-/+
LINC00839	THAP9-AS1	0.103916	0.04432	0.751627	7.11e-07	4.39499	1.11e-05	#ERROR!
BOC	THAP9-AS1	-0.17354	0.000738	0.602273	0.000265	4.39308	1.12e-05	-/+
COL14A1	THAP9-AS1	-0.09437	0.067927	0.650719	5.52e-05	4.38897	1.14e-05	0/+
MNS1	THAP9-AS1	0.366632	2.25e-13	0.849863	7.58e-10	4.38863	1.14e-05	#ERROR!
GPR1	THAP9-AS1	-0.02689	0.603671	0.687999	1.35e-05	4.38819	1.14e-05	0/+
CD109	THAP9-AS1	0.045149	0.383303	0.723607	2.87e-06	4.38291	1.17e-05	0/+
NPL	THAP9-AS1	0.105445	0.04127	0.751169	7.29e-07	4.38189	1.18e-05	#ERROR!
STEAP4	THAP9-AS1	0.013498	0.794457	0.707909	5.85e-06	4.38032	1.19e-05	0/+
MIR99AHG	THAP9-AS1	-0.09797	0.058049	0.647603	6.16e-05	4.38011	1.19e-05	0/+
NCF2	THAP9-AS1	0.010006	0.846861	0.706012	6.35e-06	4.3788	1.19e-05	0/+
EFHC2	THAP9-AS1	-0.05335	0.302823	0.672716	2.47e-05	4.37833	1.2e-05	0/+
CCL14	THAP9-AS1	-0.01835	0.723216	0.691412	1.18e-05	4.37793	1.2e-05	0/+
PHYHIP	THAP9-AS1	-0.12236	0.017762	0.632447	0.000103	4.37519	1.21e-05	-/+
GPR27	THAP9-AS1	-0.10886	0.035101	0.64033	7.91e-05	4.37296	1.23e-05	-/+
CNN3	THAP9-AS1	0.049495	0.339146	0.724707	2.73e-06	4.37261	1.23e-05	0/+
CPZ	THAP9-AS1	-0.12052	0.01957	0.632988	0.000101	4.37028	1.24e-05	-/+
FBXO17	THAP9-AS1	-0.15613	0.002429	0.610704	0.000206	4.37016	1.24e-05	-/+
ITPR2	THAP9-AS1	0.241942	2.14e-06	0.805352	2.72e-08	4.36692	1.26e-05	#ERROR!
EFCAB1	THAP9-AS1	0.059229	0.252565	0.728662	2.26e-06	4.36565	1.27e-05	0/+
OVGP1	THAP9-AS1	0.276288	5.37e-08	0.817599	1.12e-08	4.36213	1.29e-05	#ERROR!
TLL1	THAP9-AS1	-0.05056	0.328803	0.671556	2.58e-05	4.3536	1.34e-05	0/+
PCDHGC3	THAP9-AS1	-0.1367	0.008032	0.620601	0.000151	4.35039	1.36e-05	-/+
CACNB4	THAP9-AS1	0.113038	0.02862	0.751787	7.05e-07	4.35034	1.36e-05	#ERROR!
DRD1	THAP9-AS1	0.02116	0.682952	0.708417	5.72e-06	4.34684	1.38e-05	0/+
HCG22	THAP9-AS1	0.000795	0.987754	0.698109	8.91e-06	4.3467	1.38e-05	0/+
RNF144A	THAP9-AS1	0.142052	0.005858	0.76393	3.63e-07	4.34548	1.39e-05	#ERROR!
SCPEP1	THAP9-AS1	0.021867	0.672961	0.708578	5.68e-06	4.3449	1.39e-05	0/+
MFSD14C	THAP9-AS1	0.30959	8.99e-10	0.828079	4.96e-09	4.34213	1.41e-05	#ERROR!
LOC441239	THAP9-AS1	0.0841	0.103942	0.737825	1.45e-06	4.33955	1.43e-05	0/+
HSPB1	THAP9-AS1	-0.15966	0.001926	0.604472	0.000248	4.33863	1.43e-05	-/+
ERG	THAP9-AS1	-0.03945	0.446288	0.675099	2.25e-05	4.33013	1.49e-05	0/+
RB1	THAP9-AS1	0.489367	0	0.884164	1.97e-11	4.32905	1.5e-05	#ERROR!
IL1R1	THAP9-AS1	0.033234	0.521126	0.71261	4.75e-06	4.32862	1.5e-05	0/+
HOGA1	THAP9-AS1	0.134739	0.00899	0.759274	4.71e-07	4.32719	1.51e-05	#ERROR!
CYP2T1P	THAP9-AS1	0.079076	0.126366	0.734006	1.75e-06	4.32306	1.54e-05	0/+
FSCN1	THAP9-AS1	0.042143	0.415801	0.715909	4.09e-06	4.31761	1.58e-05	0/+
GALNT15	THAP9-AS1	-0.03536	0.494807	0.675894	2.18e-05	4.31689	1.58e-05	0/+
KDM2B	THAP9-AS1	0.356135	1.18e-12	0.842375	1.49e-09	4.31666	1.58e-05	#ERROR!
CERS4	THAP9-AS1	-0.1632	0.001519	0.59934	0.000289	4.31638	1.59e-05	-/+
NPEPPSP1	THAP9-AS1	0.255789	5.15e-07	0.80686	2.44e-08	4.31425	1.6e-05	#ERROR!
EFS	THAP9-AS1	-0.09186	0.075618	0.642962	7.23e-05	4.30901	1.64e-05	0/+
LINC00665	THAP9-AS1	0.016741	0.746603	0.701613	7.68e-06	4.30095	1.7e-05	0/+
STX11	THAP9-AS1	-0.0637	0.218409	0.657991	4.26e-05	4.29756	1.73e-05	0/+
SUFU	THAP9-AS1	0.090199	0.081086	0.736437	1.55e-06	4.29328	1.76e-05	0/+
ANKRD35	THAP9-AS1	-0.12944	0.012118	0.618035	0.000164	4.29218	1.77e-05	-/+
CSRNP3	THAP9-AS1	0.05837	0.259522	0.720807	3.27e-06	4.28663	1.81e-05	0/+
RRAGD	THAP9-AS1	-0.0367	0.478635	0.671799	2.55e-05	4.28584	1.82e-05	0/+
FRMD6	THAP9-AS1	0.074312	0.150939	0.728323	2.3e-06	4.28568	1.82e-05	0/+
CIDEB	THAP9-AS1	-0.04936	0.340507	0.664711	3.33e-05	4.28521	1.83e-05	0/+
TGFB1	THAP9-AS1	-0.09402	0.068973	0.638563	8.4e-05	4.28237	1.85e-05	0/+
CCDC3	THAP9-AS1	-0.04502	0.384676	0.666667	3.1e-05	4.28101	1.86e-05	0/+
ADAM17	THAP9-AS1	0.428314	0	0.86327	2.05e-10	4.27315	1.93e-05	#ERROR!
ANKRD33B	THAP9-AS1	-0.01279	0.805005	0.682185	1.71e-05	4.26192	2.03e-05	0/+
MOXD1	THAP9-AS1	-0.06109	0.237924	0.655425	4.67e-05	4.26161	2.03e-05	0/+
BHLHE22	THAP9-AS1	-0.16443	0.001397	0.591493	0.000363	4.2615	2.03e-05	-/+
LOC101929494	THAP9-AS1	-0.01356	0.793607	0.681652	1.74e-05	4.26076	2.04e-05	0/+
HERC6	THAP9-AS1	0.278623	4.1e-08	0.811584	1.74e-08	4.25931	2.05e-05	#ERROR!
NDRG2	THAP9-AS1	-0.03129	0.545747	0.671554	2.58e-05	4.25635	2.08e-05	0/+
FOXC2	THAP9-AS1	-0.03204	0.536259	0.670884	2.64e-05	4.25394	2.1e-05	0/+
IL12A-AS1	THAP9-AS1	-0.02272	0.660914	0.675399	2.22e-05	4.24859	2.15e-05	0/+
LZTS1	THAP9-AS1	-0.01921	0.71084	0.677053	2.09e-05	4.24621	2.17e-05	0/+
INSYN1	THAP9-AS1	-0.19686	0.000124	0.567082	0.000714	4.24528	2.18e-05	-/+
TF	THAP9-AS1	-0.00949	0.854679	0.682127	1.71e-05	4.24474	2.19e-05	0/+
ADAM23	THAP9-AS1	-0.05422	0.294969	0.657195	4.39e-05	4.24256	2.21e-05	0/+
CLEC5A	THAP9-AS1	0.143903	0.00524	0.755894	5.66e-07	4.24014	2.23e-05	#ERROR!
SMG1P5	THAP9-AS1	0.323813	1.33e-10	0.826669	5.55e-09	4.23997	2.24e-05	#ERROR!
PLXDC2	THAP9-AS1	-0.02141	0.679402	0.674853	2.27e-05	4.23691	2.27e-05	0/+
PARD6G	THAP9-AS1	0.114224	0.026981	0.742302	1.15e-06	4.23614	2.27e-05	#ERROR!
LOC102724330	THAP9-AS1	0.226776	9.22e-06	0.789807	7.69e-08	4.23245	2.31e-05	#ERROR!
LINC01140	THAP9-AS1	-0.08453	0.10216	0.637639	8.66e-05	4.22636	2.38e-05	0/+
TRIL	THAP9-AS1	-0.09282	0.072601	0.632331	0.000103	4.22363	2.4e-05	0/+
ARHGAP20	THAP9-AS1	-0.04706	0.363429	0.659028	4.1e-05	4.22269	2.41e-05	0/+
THSD1	THAP9-AS1	0.03369	0.515432	0.702108	7.52e-06	4.22043	2.44e-05	0/+
PDLIM4	THAP9-AS1	-0.217	2.25e-05	0.54912	0.001135	4.21986	2.44e-05	-/+
FOXI2	THAP9-AS1	-0.11624	0.024377	0.617318	0.000167	4.21885	2.46e-05	-/+
SPSB3	THAP9-AS1	0.191143	0.000196	0.774152	2.02e-07	4.21711	2.47e-05	#ERROR!
MID2	THAP9-AS1	-0.05512	0.287026	0.653592	4.99e-05	4.21528	2.49e-05	0/+
MCC	THAP9-AS1	0.015739	0.761285	0.691716	1.16e-05	4.20911	2.56e-05	0/+
AFAP1L1	THAP9-AS1	0.035298	0.495569	0.701677	7.66e-06	4.20804	2.58e-05	0/+
MIR1915HG	THAP9-AS1	-0.04352	0.400742	0.659208	4.08e-05	4.20639	2.59e-05	0/+
CNTNAP3B	THAP9-AS1	0.026272	0.612048	0.696856	9.39e-06	4.20602	2.6e-05	0/+
CDHR1	THAP9-AS1	-0.08458	0.101966	0.635188	9.4e-05	4.20586	2.6e-05	0/+
LMCD1	THAP9-AS1	0.069535	0.179056	0.718475	3.64e-06	4.20579	2.6e-05	0/+
LOC105371267	THAP9-AS1	-0.05685	0.272166	0.651205	5.43e-05	4.20308	2.63e-05	0/+
FRMD6-AS2	THAP9-AS1	-0.12386	0.016407	0.610276	0.000208	4.20085	2.66e-05	-/+
LINC02613	THAP9-AS1	-0.13963	0.006767	0.599854	0.000285	4.19886	2.68e-05	-/+
ADCK2	THAP9-AS1	0.133294	0.009762	0.747434	8.86e-07	4.19665	2.71e-05	#ERROR!
PCARE	THAP9-AS1	-0.11442	0.026723	0.615399	0.000178	4.19394	2.74e-05	-/+
TRERF1	THAP9-AS1	0.220732	1.61e-05	0.784457	1.08e-07	4.19366	2.74e-05	#ERROR!
HIF1A	THAP9-AS1	0.368514	1.66e-13	0.839076	1.99e-09	4.18818	2.81e-05	#ERROR!
SLIT3	THAP9-AS1	-0.08486	0.100829	0.632698	0.000102	4.1863	2.84e-05	0/+
GALNT16	THAP9-AS1	-0.15882	0.002036	0.585411	0.000432	4.1856	2.84e-05	-/+
CRABP2	THAP9-AS1	-0.05747	0.266919	0.648817	5.9e-05	4.1854	2.85e-05	0/+
RNF217	THAP9-AS1	0.056685	0.273555	0.709677	5.41e-06	4.18035	2.91e-05	0/+
GLI3	THAP9-AS1	-0.0164	0.751536	0.671249	2.61e-05	4.17849	2.93e-05	0/+
STING1	THAP9-AS1	-0.02824	0.585586	0.664589	3.35e-05	4.1776	2.95e-05	0/+
TBX18	THAP9-AS1	0.038677	0.455213	0.699853	8.27e-06	4.17294	3.01e-05	0/+
SCN2B	THAP9-AS1	-0.18696	0.000272	0.564018	0.000774	4.17081	3.04e-05	-/+
HTR7	THAP9-AS1	-0.13212	0.010432	0.601027	0.000275	4.16958	3.05e-05	-/+
PROS1	THAP9-AS1	0.139459	0.006834	0.747801	8.7e-07	4.16919	3.06e-05	#ERROR!
GPIHBP1	THAP9-AS1	-0.16269	0.001572	0.580568	0.000495	4.16866	3.06e-05	-/+
CPPED1	THAP9-AS1	0.064917	0.209754	0.71261	4.75e-06	4.16861	3.06e-05	0/+
SNCG	THAP9-AS1	-0.15751	0.00222	0.583944	0.00045	4.16762	3.08e-05	-/+
FAM124B	THAP9-AS1	-0.09789	0.058244	0.621929	0.000145	4.16302	3.14e-05	0/+
GRIK4	THAP9-AS1	-0.05009	0.333333	0.650468	5.57e-05	4.1625	3.15e-05	0/+
TRPC6	THAP9-AS1	0.17554	0.000639	0.763083	3.81e-07	4.16216	3.15e-05	#ERROR!
GDAP1	THAP9-AS1	0.164975	0.001346	0.758431	4.93e-07	4.16134	3.16e-05	#ERROR!
SLC25A46	THAP9-AS1	0.387618	6.66e-15	0.843842	1.31e-09	4.15811	3.21e-05	#ERROR!
BMP2K	THAP9-AS1	0.281303	3e-08	0.805352	2.72e-08	4.15402	3.27e-05	#ERROR!
CHODL	THAP9-AS1	-0.13195	0.010531	0.599083	0.000291	4.15341	3.28e-05	-/+
RYR1	THAP9-AS1	-0.02763	0.59379	0.662145	3.66e-05	4.1525	3.29e-05	0/+
GAS7	THAP9-AS1	-0.10292	0.046414	0.617302	0.000168	4.15077	3.31e-05	-/+
TRIM38	THAP9-AS1	0.372171	9.17e-14	0.837977	2.19e-09	4.14816	3.35e-05	#ERROR!
ETNK2	THAP9-AS1	-0.07371	0.154272	0.634589	9.59e-05	4.14569	3.39e-05	0/+
LINC01117	THAP9-AS1	0.022197	0.668312	0.687871	1.36e-05	4.13961	3.48e-05	0/+
PARP11	THAP9-AS1	0.313942	5.07e-10	0.816424	1.22e-08	4.13651	3.53e-05	#ERROR!
ELK3	THAP9-AS1	0.178488	0.000515	0.762097	4.03e-07	4.13495	3.55e-05	#ERROR!
ADAM33	THAP9-AS1	-0.05537	0.284884	0.644121	6.95e-05	4.1341	3.56e-05	0/+
HOPX	THAP9-AS1	-0.05042	0.330198	0.646994	6.29e-05	4.13392	3.57e-05	0/+
S100A3	THAP9-AS1	0.088981	0.085291	0.720286	3.35e-06	4.12611	3.69e-05	0/+
NCOA3	THAP9-AS1	0.342546	9.19e-12	0.826139	5.79e-09	4.12538	3.7e-05	#ERROR!
KLF17	THAP9-AS1	-0.07843	0.129527	0.628971	0.000115	4.12247	3.75e-05	0/+
PLA2G15	THAP9-AS1	0.131653	0.010709	0.740103	1.29e-06	4.1224	3.75e-05	#ERROR!
OLFM2	THAP9-AS1	-0.02287	0.658853	0.66129	3.78e-05	4.12086	3.77e-05	0/+
COL8A1	THAP9-AS1	-0.04431	0.392179	0.648827	5.9e-05	4.11901	3.81e-05	0/+
LINC00578	THAP9-AS1	-0.04656	0.368581	0.647107	6.27e-05	4.11543	3.86e-05	0/+
DLG2	THAP9-AS1	-0.01954	0.706091	0.66239	3.63e-05	4.11391	3.89e-05	0/+
CALHM2	THAP9-AS1	-0.12199	0.018112	0.600495	0.000279	4.11352	3.9e-05	-/+
KLHDC8B	THAP9-AS1	-0.10231	0.047717	0.612959	0.000192	4.1125	3.91e-05	-/+
NTF3	THAP9-AS1	-0.06244	0.227728	0.637338	8.75e-05	4.11188	3.92e-05	0/+
KCNJ2	THAP9-AS1	0.133068	0.009888	0.739736	1.31e-06	4.11106	3.94e-05	#ERROR!
HDAC5	THAP9-AS1	0.038314	0.45946	0.693182	1.09e-05	4.10949	3.97e-05	0/+
DTNA	THAP9-AS1	-0.0436	0.399809	0.648094	6.05e-05	4.10905	3.97e-05	0/+
GNPTAB	THAP9-AS1	0.388665	5.77e-15	0.841276	1.64e-09	4.10734	4e-05	#ERROR!
SLITRK3	THAP9-AS1	-0.16036	0.001838	0.573996	0.000593	4.10697	4.01e-05	-/+
RPS6KA6	THAP9-AS1	-0.03908	0.45056	0.650289	5.61e-05	4.10532	4.04e-05	0/+
ADAMTSL4	THAP9-AS1	-0.03393	0.512448	0.653162	5.07e-05	4.10452	4.05e-05	0/+
MELTF	THAP9-AS1	0.089108	0.084845	0.718109	3.7e-06	4.10274	4.08e-05	0/+
THBD	THAP9-AS1	-0.09093	0.078635	0.618768	0.00016	4.10177	4.1e-05	0/+
AKIRIN2	THAP9-AS1	0.340094	1.32e-11	0.82368	7.02e-09	4.1006	4.12e-05	#ERROR!
KLF8	THAP9-AS1	0.081208	0.116431	0.713657	4.53e-06	4.09683	4.19e-05	0/+
MAMSTR	THAP9-AS1	0.014718	0.776354	0.679252	1.92e-05	4.0958	4.21e-05	0/+
BRWD1-AS2	THAP9-AS1	0.14146	0.006069	0.741877	1.18e-06	4.09188	4.28e-05	#ERROR!
RIOX1	THAP9-AS1	0.149906	0.003618	0.745601	9.75e-07	4.09039	4.31e-05	#ERROR!
CPNE8	THAP9-AS1	0.108703	0.035358	0.726173	2.54e-06	4.08796	4.35e-05	#ERROR!
NAV3	THAP9-AS1	-0.0327	0.527804	0.651939	5.29e-05	4.08761	4.36e-05	0/+
C3orf14	THAP9-AS1	-0.05775	0.264617	0.637155	8.8e-05	4.08663	4.38e-05	0/+
TMEM178B	THAP9-AS1	0.022198	0.668295	0.682068	1.71e-05	4.08453	4.42e-05	0/+
BOLA3-AS1	THAP9-AS1	-0.13088	0.011184	0.590942	0.000369	4.08441	4.42e-05	-/+
OSBPL6	THAP9-AS1	-0.0194	0.708033	0.659091	4.09e-05	4.08373	4.43e-05	0/+
RIC1	THAP9-AS1	0.374909	5.84e-14	0.835044	2.8e-09	4.08293	4.45e-05	#ERROR!
C3orf38	THAP9-AS1	0.474711	0	0.868402	1.2e-10	4.08272	4.45e-05	#ERROR!
ATP10D	THAP9-AS1	0.277297	4.78e-08	0.798754	4.27e-08	4.08272	4.45e-05	#ERROR!
BTBD11	THAP9-AS1	0.05328	0.303453	0.698075	8.92e-06	4.08169	4.47e-05	0/+
FMO1	THAP9-AS1	-0.000705	0.989148	0.669172	2.82e-05	4.08039	4.5e-05	0/+
AMOTL2	THAP9-AS1	0.136899	0.007938	0.738636	1.39e-06	4.07919	4.52e-05	#ERROR!
A4GALT	THAP9-AS1	-0.13377	0.009504	0.588343	0.000398	4.07915	4.52e-05	-/+
ANGPT4	THAP9-AS1	-0.08831	0.087688	0.617448	0.000167	4.07769	4.55e-05	0/+
CD300LG	THAP9-AS1	-0.19255	0.000176	0.546772	0.001204	4.07436	4.61e-05	-/+
LRIG3	THAP9-AS1	0.313392	5.45e-10	0.81195	1.7e-08	4.07272	4.65e-05	#ERROR!
RAB9A	THAP9-AS1	0.29159	8.75e-09	0.803043	3.19e-08	4.06463	4.81e-05	#ERROR!
APCDD1	THAP9-AS1	-0.03599	0.487184	0.647361	6.21e-05	4.06426	4.82e-05	0/+
MR1	THAP9-AS1	0.100053	0.052878	0.719575	3.46e-06	4.06239	4.86e-05	0/+
SYNGR1	THAP9-AS1	-0.1742	0.000704	0.557918	0.000907	4.05948	4.92e-05	-/+
CNIH3	THAP9-AS1	-0.01455	0.778872	0.658845	4.13e-05	4.05708	4.97e-05	0/+
PLSCR3	THAP9-AS1	0.25931	3.54e-07	0.78944	7.87e-08	4.05333	5.05e-05	#ERROR!
ART4	THAP9-AS1	-0.05579	0.281238	0.634303	9.68e-05	4.05259	5.07e-05	0/+
KSR1	THAP9-AS1	0.169077	0.001013	0.750802	7.43e-07	4.05081	5.1e-05	#ERROR!
TLR5	THAP9-AS1	0.032804	0.526537	0.68396	1.59e-05	4.04892	5.15e-05	0/+
PLCD1	THAP9-AS1	0.069272	0.180706	0.702713	7.32e-06	4.04668	5.19e-05	0/+
RGMA	THAP9-AS1	-0.18141	0.000415	0.550953	0.001084	4.04634	5.2e-05	-/+
CLDN11	THAP9-AS1	-0.16019	0.001859	0.565851	0.000737	4.04529	5.23e-05	-/+
CILP	THAP9-AS1	-0.15765	0.0022	0.567449	0.000707	4.044	5.25e-05	-/+
TENT2	THAP9-AS1	0.50389	0	0.875733	5.32e-11	4.04366	5.26e-05	#ERROR!
MSL3	THAP9-AS1	0.475031	0	0.866569	1.45e-10	4.04332	5.27e-05	#ERROR!
PLAG1	THAP9-AS1	0.249848	9.58e-07	0.784713	1.06e-07	4.04171	5.31e-05	#ERROR!
MS4A4E	THAP9-AS1	0.011959	0.817453	0.671865	2.55e-05	4.04124	5.32e-05	0/+
MYRF	THAP9-AS1	0.371964	9.48e-14	-0.38952	0.027551	-4.04	5.35e-05	#ERROR!
SHROOM4	THAP9-AS1	0.009762	0.85055	0.670088	2.72e-05	4.03603	5.44e-05	0/+
ABCA6	THAP9-AS1	-0.00986	0.849115	0.659091	4.09e-05	4.03563	5.45e-05	0/+
PTGIS	THAP9-AS1	-0.15471	0.002663	0.568182	0.000693	4.03431	5.48e-05	-/+
CIDEA	THAP9-AS1	-0.07683	0.137518	0.61921	0.000158	4.03384	5.49e-05	0/+
MID1	THAP9-AS1	0.286617	1.6e-08	0.798827	4.25e-08	4.03273	5.51e-05	#ERROR!
EFEMP1	THAP9-AS1	-0.11484	0.026163	0.594575	0.000332	4.03059	5.56e-05	-/+
SNX29	THAP9-AS1	0.032711	0.527713	0.681818	1.73e-05	4.02918	5.6e-05	0/+
KAT2B	THAP9-AS1	0.186466	0.000283	0.756598	5.45e-07	4.02795	5.63e-05	#ERROR!
MKRN3	THAP9-AS1	0.073174	0.15731	0.702144	7.5e-06	4.02127	5.79e-05	0/+
IRX6	THAP9-AS1	-0.04269	0.409784	0.638408	8.44e-05	4.02119	5.79e-05	0/+
LTN1	THAP9-AS1	0.423344	0	0.84824	8.81e-10	4.02064	5.8e-05	#ERROR!
TMEM255B	THAP9-AS1	0.00803	0.876834	0.667155	3.04e-05	4.01803	5.87e-05	0/+
KIF2A	THAP9-AS1	0.432417	0	0.851173	6.71e-10	4.01784	5.87e-05	#ERROR!
DTWD2	THAP9-AS1	0.338903	1.57e-11	0.817815	1.1e-08	4.01684	5.9e-05	#ERROR!
NLRP1	THAP9-AS1	0.119718	0.020399	0.724707	2.73e-06	4.01614	5.92e-05	#ERROR!
FJX1	THAP9-AS1	-0.03258	0.529321	0.643695	7.05e-05	4.01543	5.93e-05	0/+
PRKAR2B	THAP9-AS1	-0.04074	0.43153	0.638563	8.4e-05	4.01267	6e-05	0/+
LINC02884	THAP9-AS1	-0.08503	0.100166	0.611471	0.000201	4.01265	6e-05	0/+
MPP7	THAP9-AS1	0.091789	0.075848	0.710411	5.24e-06	4.00995	6.07e-05	0/+
SLFN12	THAP9-AS1	0.19166	0.000189	0.757287	5.25e-07	4.00894	6.1e-05	#ERROR!
CPT1C	THAP9-AS1	0.005369	0.917467	0.664589	3.35e-05	4.00821	6.12e-05	0/+
FBXL17	THAP9-AS1	0.261035	2.94e-07	0.786657	9.39e-08	4.00701	6.15e-05	#ERROR!
FGF14-AS2	THAP9-AS1	-0.11926	0.020893	0.588505	0.000396	4.00611	6.17e-05	-/+
RAET1E-AS1	THAP9-AS1	0.056899	0.271745	0.691913	1.15e-05	4.00336	6.24e-05	0/+
DCLK1	THAP9-AS1	-0.07578	0.143022	0.615836	0.000175	4.00102	6.31e-05	0/+
CHST9	THAP9-AS1	0.003308	0.949097	0.662572	3.61e-05	4.00044	6.32e-05	0/+
RGS7BP	THAP9-AS1	-0.05551	0.283679	0.627624	0.000121	3.99526	6.46e-05	0/+
CYP11A1	THAP9-AS1	-0.16631	0.001227	0.554669	0.000986	3.99488	6.47e-05	-/+
CRISP3	THAP9-AS1	-0.00466	0.928405	0.657204	4.38e-05	3.99265	6.53e-05	0/+
LYPD5	THAP9-AS1	0.110003	0.033209	0.717742	3.77e-06	3.99261	6.54e-05	#ERROR!
CDH26	THAP9-AS1	0.083625	0.105917	0.704556	6.77e-06	3.99234	6.54e-05	0/+
SLC10A6	THAP9-AS1	0.022638	0.662129	0.672167	2.52e-05	3.9902	6.6e-05	0/+
SLC66A2	THAP9-AS1	0.047443	0.359573	0.685484	1.5e-05	3.98951	6.62e-05	0/+
AQP1	THAP9-AS1	-0.12	0.020106	0.585777	0.000428	3.98892	6.64e-05	-/+
SNTG2	THAP9-AS1	-0.0233	0.65288	0.645581	6.61e-05	3.98489	6.75e-05	0/+
MYOSLID	THAP9-AS1	0.16216	0.001629	0.741826	1.18e-06	3.98455	6.76e-05	#ERROR!
TLE3	THAP9-AS1	0.165807	0.001271	0.743402	1.09e-06	3.98337	6.79e-05	#ERROR!
CSRP2	THAP9-AS1	0.0464	0.370241	0.684018	1.59e-05	3.98087	6.87e-05	0/+
SERPINB9	THAP9-AS1	0.123103	0.017079	0.72294	2.96e-06	3.98014	6.89e-05	#ERROR!
ARHGEF3	THAP9-AS1	0.196436	0.000129	0.75692	5.35e-07	3.97961	6.9e-05	#ERROR!
PDE1C	THAP9-AS1	0.004515	0.930564	0.660924	3.83e-05	3.97959	6.9e-05	0/+
SMO	THAP9-AS1	-0.08532	0.099018	0.607038	0.00023	3.9786	6.93e-05	0/+
MIR125B2	THAP9-AS1	-0.11612	0.024525	0.586643	0.000417	3.97578	7.02e-05	-/+
SNORD15B	THAP9-AS1	0.094055	0.068862	-0.60098	0.000276	-3.97491	7.04e-05	0/-
GABRE	THAP9-AS1	0.12494	0.015484	0.72324	2.92e-06	3.97391	7.07e-05	#ERROR!
LINC00662	THAP9-AS1	0.247742	1.19e-06	0.778592	1.55e-07	3.97376	7.07e-05	#ERROR!
NPY1R	THAP9-AS1	-0.05815	0.261346	0.623408	0.000138	3.97372	7.08e-05	0/+
LINC01347	THAP9-AS1	0.355311	1.34e-12	0.821124	8.56e-09	3.9736	7.08e-05	#ERROR!
JAK2	THAP9-AS1	0.371314	1.05e-13	0.826979	5.42e-09	3.97264	7.11e-05	#ERROR!
NIPAL4	THAP9-AS1	-0.15205	0.00316	0.561635	0.000824	3.97212	7.12e-05	-/+
ST6GAL2	THAP9-AS1	-0.00445	0.931521	0.654872	4.77e-05	3.97101	7.16e-05	0/+
PTGS1	THAP9-AS1	-0.11901	0.021159	0.583944	0.00045	3.96985	7.19e-05	-/+
MAGEE1	THAP9-AS1	-0.12803	0.013094	0.577713	0.000535	3.96861	7.23e-05	-/+
C5orf66-AS1	THAP9-AS1	-0.09315	0.071586	0.600678	0.000278	3.96796	7.25e-05	0/+
LINC00589	THAP9-AS1	0.234218	4.55e-06	-0.49973	0.00359	-3.96777	7.25e-05	#ERROR!
MAP1LC3C	THAP9-AS1	-0.1194	0.020737	0.583349	0.000458	3.96729	7.27e-05	-/+
MDM2	THAP9-AS1	0.437407	0	0.850073	7.43e-10	3.96679	7.28e-05	#ERROR!
CYYR1	THAP9-AS1	-0.02151	0.678064	0.644428	6.87e-05	3.96589	7.31e-05	0/+
ARHGAP23	THAP9-AS1	-0.02802	0.588561	0.640396	7.89e-05	3.96415	7.37e-05	0/+
PGM5-AS1	THAP9-AS1	-0.16625	0.001233	0.550087	0.001108	3.96133	7.45e-05	-/+
CAMK1D	THAP9-AS1	-0.04063	0.432751	0.632331	0.000103	3.95947	7.51e-05	0/+
LRRN2	THAP9-AS1	-0.01246	0.809913	0.648827	5.9e-05	3.95841	7.55e-05	0/+
DACT2	THAP9-AS1	-0.04181	0.419524	0.631405	0.000107	3.95764	7.57e-05	0/+
CYP4B1	THAP9-AS1	-0.14383	0.005264	0.565301	0.000748	3.95684	7.59e-05	-/+
PEA15	THAP9-AS1	-0.10143	0.049681	0.593475	0.000343	3.95368	7.7e-05	-/+
ARHGEF10L	THAP9-AS1	0.251554	8.03e-07	0.778592	1.55e-07	3.95328	7.71e-05	#ERROR!
MYOZ1	THAP9-AS1	-0.10154	0.049435	0.593211	0.000346	3.95218	7.74e-05	-/+
MALT1	THAP9-AS1	0.399072	8.88e-16	0.835777	2.64e-09	3.95197	7.75e-05	#ERROR!
BLVRA	THAP9-AS1	-0.000869	0.986622	0.654692	4.8e-05	3.95137	7.77e-05	0/+
MTPN	THAP9-AS1	0.355502	1.3e-12	0.819648	9.58e-09	3.94976	7.82e-05	#ERROR!
PLEKHH2	THAP9-AS1	0.179737	0.00047	0.746769	9.18e-07	3.94917	7.84e-05	#ERROR!
P2RX7	THAP9-AS1	-0.04134	0.424749	0.630614	0.000109	3.94866	7.86e-05	0/+
TMEM132C	THAP9-AS1	-0.15683	0.002321	0.554904	0.00098	3.94752	7.9e-05	-/+
FZD1	THAP9-AS1	0.08391	0.104727	0.700147	8.17e-06	3.94706	7.91e-05	0/+
SNAI2	THAP9-AS1	0.058048	0.262164	0.686584	1.43e-05	3.9464	7.93e-05	0/+
NFASC	THAP9-AS1	-0.08097	0.117496	0.605261	0.000242	3.94241	8.07e-05	0/+
PPM1F	THAP9-AS1	0.077813	0.132557	0.696481	9.54e-06	3.94193	8.08e-05	0/+
LINC00933	THAP9-AS1	-0.03592	0.487977	0.632872	0.000102	3.94026	8.14e-05	0/+
SMC6	THAP9-AS1	0.53777	0	0.881598	2.69e-11	3.93901	8.18e-05	#ERROR!
CX3CL1	THAP9-AS1	-0.09006	0.081557	0.598974	0.000292	3.93884	8.19e-05	0/+
LINC01550	THAP9-AS1	0.001409	0.978309	0.654442	4.84e-05	3.93769	8.23e-05	0/+
SULF2	THAP9-AS1	0.22875	7.66e-06	0.767595	2.95e-07	3.93747	8.23e-05	#ERROR!
LRRC46	THAP9-AS1	0.11698	0.02348	0.715846	4.1e-06	3.93735	8.24e-05	#ERROR!
GPR161	THAP9-AS1	0.023576	0.64905	0.666789	3.08e-05	3.93637	8.27e-05	0/+
TMEM200B	THAP9-AS1	-0.12722	0.013688	0.57368	0.000598	3.93407	8.35e-05	-/+
PCDHGB5	THAP9-AS1	-0.05056	0.328826	0.623224	0.000139	3.93388	8.36e-05	0/+
RTN4RL1	THAP9-AS1	-0.14157	0.006028	0.563755	0.000779	3.93381	8.36e-05	-/+
LIPE	THAP9-AS1	0.066945	0.195833	0.689883	1.25e-05	3.93298	8.39e-05	0/+
ANOS1	THAP9-AS1	0.14953	0.003704	0.731189	2e-06	3.93263	8.4e-05	#ERROR!
NRG2	THAP9-AS1	-0.15612	0.002431	0.553152	0.001025	3.93113	8.45e-05	-/+
MEOX1	THAP9-AS1	-0.12366	0.016581	0.575513	0.000569	3.92964	8.51e-05	-/+
PCYT1B	THAP9-AS1	-0.04397	0.395805	0.626261	0.000126	3.92571	8.65e-05	0/+
MARK1	THAP9-AS1	-0.02445	0.636925	0.63783	8.61e-05	3.9243	8.7e-05	0/+
PTPN13	THAP9-AS1	0.000367	0.994355	0.652126	5.26e-05	3.92259	8.76e-05	0/+
PTN	THAP9-AS1	-0.08489	0.100722	0.600073	0.000283	3.92124	8.81e-05	0/+
CDH13	THAP9-AS1	0.094153	0.068573	0.702713	7.32e-06	3.92049	8.84e-05	0/+
NRTN	THAP9-AS1	-0.00965	0.85221	0.645894	6.54e-05	3.91882	8.9e-05	0/+
RNF144B	THAP9-AS1	0.104067	0.044011	0.707478	5.96e-06	3.91779	8.94e-05	#ERROR!
CALHM5	THAP9-AS1	0.013067	0.800887	0.658785	4.14e-05	3.91741	8.95e-05	0/+
NMUR1	THAP9-AS1	-0.1796	0.000474	0.53392	0.001648	3.91533	9.03e-05	-/+
RADIL	THAP9-AS1	-0.14029	0.006507	0.561973	0.000816	3.91406	9.08e-05	-/+
PTPRQ	THAP9-AS1	0.001173	0.981938	0.651605	5.35e-05	3.91395	9.08e-05	0/+
ARL4D	THAP9-AS1	-0.06657	0.198377	0.610576	0.000206	3.91192	9.16e-05	0/+
PRKAR2A-AS1	THAP9-AS1	0.187381	0.000263	0.746951	9.09e-07	3.91139	9.18e-05	#ERROR!
DIPK2B	THAP9-AS1	-0.05904	0.254079	0.615103	0.000179	3.91037	9.22e-05	0/+
LOC102724050	THAP9-AS1	-0.03389	0.512913	0.63052	0.00011	3.9103	9.22e-05	0/+
C12orf56	THAP9-AS1	0.094242	0.068309	0.701666	7.66e-06	3.90964	9.24e-05	0/+
RNASE7	THAP9-AS1	-0.09775	0.058615	0.590025	0.000379	3.90818	9.3e-05	0/+
GOLGA8R	THAP9-AS1	0.143264	0.005446	0.725655	2.61e-06	3.9055	9.4e-05	#ERROR!
SMC2	THAP9-AS1	0.562972	0	0.887911	1.23e-11	3.9033	9.49e-05	#ERROR!
LINC02243	THAP9-AS1	0.035824	0.489173	0.669939	2.74e-05	3.90329	9.49e-05	0/+
GIMAP1	THAP9-AS1	-0.10768	0.037134	0.582715	0.000466	3.90263	9.52e-05	-/+
PCP4L1	THAP9-AS1	-0.17725	0.000564	0.533822	0.001652	3.90242	9.52e-05	-/+
SSPN	THAP9-AS1	-0.01515	0.769989	0.640762	7.79e-05	3.9024	9.52e-05	0/+
SFRP1	THAP9-AS1	-0.14322	0.005461	0.558284	0.000899	3.90205	9.54e-05	-/+
BAG4	THAP9-AS1	0.529227	0	0.877199	4.5e-11	3.9014	9.56e-05	#ERROR!
ELOVL4	THAP9-AS1	-0.03443	0.506244	0.628781	0.000116	3.89849	9.68e-05	0/+
RNF31	THAP9-AS1	0.26183	2.7e-07	0.778592	1.55e-07	3.89786	9.7e-05	#ERROR!
SRPX	THAP9-AS1	-0.08062	0.119112	0.599707	0.000286	3.8967	9.75e-05	0/+
NRIP1	THAP9-AS1	0.350413	2.83e-12	0.81415	1.45e-08	3.89577	9.79e-05	#ERROR!
FAM43B	THAP9-AS1	-0.19829	0.000111	0.516868	0.002454	3.89431	9.85e-05	-/+
MN1	THAP9-AS1	-0.08531	0.099039	0.596096	0.000318	3.89218	9.93e-05	0/+
INMT	THAP9-AS1	-0.10275	0.046769	0.584548	0.000443	3.89153	9.96e-05	-/+
CNEP1R1	THAP9-AS1	0.486187	0	0.862616	2.19e-10	3.89135	9.97e-05	#ERROR!
PI4K2A	THAP9-AS1	0.188545	0.000241	0.745601	9.75e-07	3.88997	0.0001	#ERROR!
MIF4GD	THAP9-AS1	0.040438	0.434926	0.670821	2.65e-05	3.88808	0.000101	0/+
MCF2L2	THAP9-AS1	0.243525	1.82e-06	0.769936	2.58e-07	3.88747	0.000101	#ERROR!
SNORA80A	THAP9-AS1	-0.11292	0.028792	-0.70892	5.59e-06	-3.88727	0.000101	-/-
PLEKHG1	THAP9-AS1	0.242576	2e-06	0.769499	2.65e-07	3.88714	0.000101	#ERROR!
HS3ST6	THAP9-AS1	0.05844	0.258951	0.680426	1.83e-05	3.8862	0.000102	0/+
CTDSP2	THAP9-AS1	0.177431	0.000557	0.740103	1.29e-06	3.88608	0.000102	#ERROR!
PLXNA4	THAP9-AS1	-0.10052	0.051767	0.584677	0.000441	3.88118	0.000104	0/+
SKIDA1	THAP9-AS1	-0.02721	0.599341	0.631039	0.000108	3.88097	0.000104	0/+
FEM1A	THAP9-AS1	0.208674	4.65e-05	0.753987	6.27e-07	3.8809	0.000104	#ERROR!
TOGARAM1	THAP9-AS1	0.299464	3.3e-09	0.792889	6.3e-08	3.88031	0.000104	#ERROR!
PDP1	THAP9-AS1	0.306973	1.26e-09	0.795821	5.19e-08	3.87869	0.000105	#ERROR!
RCBTB2	THAP9-AS1	0.149565	0.003696	0.726173	2.54e-06	3.87858	0.000105	#ERROR!
ARG1	THAP9-AS1	0.291164	9.22e-09	0.78932	7.93e-08	3.87807	0.000105	#ERROR!
NDRG4	THAP9-AS1	0.009389	0.856206	0.652126	5.26e-05	3.87713	0.000106	0/+
STAC	THAP9-AS1	-0.0901	0.081405	0.590888	0.00037	3.87602	0.000106	0/+
CYP26B1	THAP9-AS1	0.13397	0.009394	0.718123	3.7e-06	3.87399	0.000107	#ERROR!
EPAS1	THAP9-AS1	0.148965	0.003838	0.725323	2.65e-06	3.87262	0.000108	#ERROR!
HRNR	THAP9-AS1	-0.06622	0.200708	0.605869	0.000238	3.87254	0.000108	0/+
ENDOU	THAP9-AS1	0.046653	0.367642	0.672351	2.5e-05	3.87075	0.000108	0/+
BGN	THAP9-AS1	-0.02284	0.65925	0.632331	0.000103	3.86977	0.000109	0/+
SNCAIP	THAP9-AS1	-0.02931	0.571534	0.628357	0.000118	3.86914	0.000109	0/+
LINC01918	THAP9-AS1	-0.01709	0.741556	0.635672	9.25e-05	3.86889	0.000109	0/+
POU3F1	THAP9-AS1	-0.14865	0.003913	0.54984	0.001115	3.86864	0.000109	-/+
THSD7B	THAP9-AS1	-0.11623	0.024392	0.572371	0.000619	3.86806	0.00011	-/+
CPNE2	THAP9-AS1	0.081276	0.116124	0.690616	1.22e-05	3.86744	0.00011	0/+
RNF165	THAP9-AS1	-0.06576	0.203894	0.605444	0.000241	3.86681	0.00011	0/+
PRSS27	THAP9-AS1	0.140294	0.006505	0.720521	3.31e-06	3.86656	0.00011	#ERROR!
DNAH9	THAP9-AS1	0.042032	0.417033	0.669054	2.83e-05	3.86389	0.000112	0/+
ID4	THAP9-AS1	-0.05451	0.292437	0.61217	0.000196	3.86376	0.000112	0/+
SYT3	THAP9-AS1	-0.09256	0.073399	0.587577	0.000406	3.86296	0.000112	0/+
LOC100507516	THAP9-AS1	-0.08543	0.098563	0.592063	0.000358	3.86139	0.000113	0/+
LOC389199	THAP9-AS1	0.01537	0.766728	0.65367	4.98e-05	3.86056	0.000113	0/+
STIM1	THAP9-AS1	0.118208	0.022051	0.708944	5.59e-06	3.86048	0.000113	#ERROR!
ARL15	THAP9-AS1	0.272413	8.35e-08	0.78013	1.41e-07	3.86017	0.000113	#ERROR!
RNH1	THAP9-AS1	0.111069	0.03153	0.705279	6.56e-06	3.85999	0.000113	#ERROR!
MGC27382	THAP9-AS1	0.135455	0.008628	0.717489	3.81e-06	3.85979	0.000113	#ERROR!
SMIM29	THAP9-AS1	-0.071	0.170023	0.601173	0.000274	3.85953	0.000114	0/+
DYRK1B	THAP9-AS1	0.138206	0.007356	0.718475	3.64e-06	3.85592	0.000115	#ERROR!
MAML2	THAP9-AS1	0.243212	1.88e-06	0.767229	3.01e-07	3.85582	0.000115	#ERROR!
MED26	THAP9-AS1	0.33696	2.08e-11	0.806159	2.57e-08	3.85547	0.000116	#ERROR!
AKT2	THAP9-AS1	0.077523	0.134011	0.687317	1.39e-05	3.85483	0.000116	0/+
RTL8B	THAP9-AS1	-0.13241	0.010263	0.559384	0.000873	3.8546	0.000116	-/+
MIR32	THAP9-AS1	0.061673	0.233478	0.678418	1.98e-05	3.85106	0.000118	0/+
SOX7	THAP9-AS1	0.000945	0.985445	0.644121	6.95e-05	3.85012	0.000118	0/+
KLHL38	THAP9-AS1	-0.07512	0.146556	0.597231	0.000308	3.84937	0.000118	0/+
PGF	THAP9-AS1	-0.02598	0.616019	0.627922	0.000119	3.84874	0.000119	0/+
STIM1-AS1	THAP9-AS1	-0.22957	7.09e-06	0.485555	0.004846	3.84872	0.000119	-/+
SELP	THAP9-AS1	-0.13861	0.007183	0.553936	0.001005	3.84667	0.00012	-/+
LRRC37A3	THAP9-AS1	0.328262	7.17e-11	0.802053	3.41e-08	3.84621	0.00012	#ERROR!
SNX21	THAP9-AS1	-0.01201	0.816747	0.635997	9.15e-05	3.84605	0.00012	0/+
CENPP	THAP9-AS1	0.377129	4.04e-14	0.821082	8.59e-09	3.846	0.00012	#ERROR!
SETBP1-DT	THAP9-AS1	-0.1549	0.002632	0.542121	0.00135	3.84545	0.00012	-/+
SCN7A	THAP9-AS1	-0.15116	0.003343	0.544721	0.001267	3.84474	0.000121	-/+
MOSPD2	THAP9-AS1	0.411269	0	0.833654	3.15e-09	3.84318	0.000121	#ERROR!
SRGAP2	THAP9-AS1	0.340584	1.23e-11	0.806709	2.47e-08	3.84277	0.000122	#ERROR!
PRELP	THAP9-AS1	-0.12795	0.013148	0.56085	0.000841	3.84253	0.000122	-/+
C1orf112	THAP9-AS1	0.45085	0	0.847818	9.15e-10	3.84174	0.000122	#ERROR!
EPCAM	THAP9-AS1	0.461745	0	-0.25696	0.155681	-3.84077	0.000123	#ERROR!
CLEC2L	THAP9-AS1	-0.04602	0.374203	0.614425	0.000183	3.83909	0.000123	0/+
TINF2	THAP9-AS1	0.109917	0.033348	0.702594	7.36e-06	3.83905	0.000124	#ERROR!
PPP2R2C	THAP9-AS1	-0.05688	0.271936	0.60746	0.000227	3.83796	0.000124	0/+
DDX58	THAP9-AS1	0.331709	4.41e-11	0.802786	3.24e-08	3.83709	0.000125	#ERROR!
PABPC5-AS1	THAP9-AS1	-0.05195	0.315675	0.610349	0.000208	3.83621	0.000125	0/+
FGF7P6	THAP9-AS1	0.06601	0.202168	0.679168	1.92e-05	3.83614	0.000125	0/+
NPR3	THAP9-AS1	-0.00847	0.870206	0.63673	8.93e-05	3.83441	0.000126	0/+
CITED2	THAP9-AS1	0.044761	0.387404	0.667155	3.04e-05	3.83284	0.000127	0/+
FGD1	THAP9-AS1	0.068181	0.187688	0.679985	1.86e-05	3.83279	0.000127	0/+
TP63	THAP9-AS1	0.069663	0.178252	0.680539	1.82e-05	3.83048	0.000128	0/+
RAPGEF5	THAP9-AS1	0.316902	3.41e-10	0.796188	5.07e-08	3.82832	0.000129	#ERROR!
DLL1	THAP9-AS1	0.184678	0.000324	0.73827	1.41e-06	3.82798	0.000129	#ERROR!
FAM107A	THAP9-AS1	-0.15091	0.003397	0.542522	0.001337	3.82772	0.000129	-/+
SLC24A3	THAP9-AS1	-0.07236	0.162018	0.596041	0.000319	3.82608	0.00013	0/+
ARL10	THAP9-AS1	0.073022	0.158175	0.681818	1.73e-05	3.8255	0.000131	0/+
PLAGL1	THAP9-AS1	0.152484	0.003073	0.722507	3.02e-06	3.82468	0.000131	#ERROR!
TRMT1L	THAP9-AS1	0.353458	1.78e-12	0.810484	1.89e-08	3.82397	0.000131	#ERROR!
MED12L	THAP9-AS1	0.005056	0.922268	0.643316	7.14e-05	3.82249	0.000132	0/+
LOC100996333	THAP9-AS1	0.0086	0.868165	0.64531	6.67e-05	3.82181	0.000132	0/+
CTSB	THAP9-AS1	0.099388	0.054483	0.695381	9.99e-06	3.82163	0.000133	0/+
LCN10	THAP9-AS1	0.010306	0.842327	0.64612	6.48e-05	3.82022	0.000133	0/+
HUS1	THAP9-AS1	0.448264	0	0.845674	1.11e-09	3.81991	0.000134	#ERROR!
HTR7P1	THAP9-AS1	0.125478	0.015041	0.708471	5.7e-06	3.81851	0.000134	#ERROR!
CYP27C1	THAP9-AS1	0.03597	0.487391	0.660554	3.88e-05	3.81773	0.000135	0/+
TMPRSS13	THAP9-AS1	0.100883	0.050932	0.695613	9.89e-06	3.81629	0.000135	0/+
EHD3	THAP9-AS1	-0.0614	0.235589	0.601778	0.000269	3.81569	0.000136	0/+
DIO3OS	THAP9-AS1	-0.0137	0.791429	0.631338	0.000107	3.81536	0.000136	0/+
MOCS3	THAP9-AS1	0.172818	0.000777	0.731189	2e-06	3.81218	0.000138	#ERROR!
CNP	THAP9-AS1	0.151348	0.003303	0.720674	3.29e-06	3.81127	0.000138	#ERROR!
LEMD3	THAP9-AS1	0.475685	0	0.854734	4.78e-10	3.80898	0.00014	#ERROR!
SPAG16	THAP9-AS1	0.145254	0.004826	0.717441	3.82e-06	3.80893	0.00014	#ERROR!
CD200	THAP9-AS1	-0.00193	0.970344	0.637463	8.71e-05	3.80769	0.00014	0/+
ARHGAP22	THAP9-AS1	-0.08759	0.090309	0.583631	0.000454	3.80744	0.00014	0/+
NDST2	THAP9-AS1	0.340789	1.19e-11	0.804326	2.92e-08	3.80741	0.00014	#ERROR!
LYNX1	THAP9-AS1	-0.13667	0.008043	0.549853	0.001114	3.80712	0.000141	-/+
MAP2	THAP9-AS1	0.114569	0.026519	0.701742	7.64e-06	3.80685	0.000141	#ERROR!
LOC441666	THAP9-AS1	0.047326	0.360759	0.665689	3.21e-05	3.8066	0.000141	0/+
CPE	THAP9-AS1	-0.10546	0.041238	0.571481	0.000634	3.80647	0.000141	-/+
TMEM19	THAP9-AS1	0.282455	2.62e-08	0.780059	1.41e-07	3.80445	0.000142	#ERROR!
INTS6L	THAP9-AS1	0.381403	1.98e-14	0.820015	9.32e-09	3.80439	0.000142	#ERROR!
SERPINI2	THAP9-AS1	0.052376	0.311747	0.668217	2.92e-05	3.80403	0.000142	0/+
CHD9	THAP9-AS1	0.388239	6.22e-15	0.822581	7.65e-09	3.80369	0.000143	#ERROR!
ACSL1	THAP9-AS1	0.246296	1.38e-06	0.764296	3.56e-07	3.80358	0.000143	#ERROR!
PLEKHF1	THAP9-AS1	0.001884	0.971	0.63893	8.29e-05	3.80095	0.000144	0/+
GOLGA8IP	THAP9-AS1	0.059692	0.248873	0.671817	2.55e-05	3.79998	0.000145	0/+
C21orf91	THAP9-AS1	0.339416	1.46e-11	0.803152	3.16e-08	3.79854	0.000146	#ERROR!
IL3RA	THAP9-AS1	-0.0302	0.559883	0.619192	0.000158	3.79805	0.000146	0/+
PTPRZ1	THAP9-AS1	-0.07279	0.159496	0.592063	0.000358	3.79732	0.000146	0/+
MAP3K8	THAP9-AS1	0.345349	6.07e-12	0.805426	2.7e-08	3.79711	0.000146	#ERROR!
FRMD4A	THAP9-AS1	0.036666	0.479007	0.658601	4.17e-05	3.79681	0.000147	0/+
FAM180A	THAP9-AS1	-0.12335	0.016858	0.557786	0.00091	3.79649	0.000147	-/+
OXGR1	THAP9-AS1	0.088528	0.086899	0.68691	1.41e-05	3.79512	0.000148	0/+
LINC01697	THAP9-AS1	-0.13055	0.011393	0.552489	0.001042	3.79477	0.000148	-/+
S1PR5	THAP9-AS1	-0.08937	0.083944	0.580704	0.000493	3.79416	0.000148	0/+
MARCHF2	THAP9-AS1	-0.12101	0.019067	0.559018	0.000882	3.79356	0.000149	-/+
IL17B	THAP9-AS1	-0.09074	0.079277	0.579681	0.000507	3.79336	0.000149	0/+
GBP1P1	THAP9-AS1	0.129759	0.011903	0.708093	5.8e-06	3.79277	0.000149	#ERROR!
SAMMSON	THAP9-AS1	0.087176	0.091849	0.6858	1.48e-05	3.79141	0.00015	0/+
GXYLT2	THAP9-AS1	-0.00362	0.944312	0.634464	9.63e-05	3.79084	0.00015	0/+
RASIP1	THAP9-AS1	-0.1417	0.005981	0.543855	0.001294	3.78986	0.000151	-/+
CLIP4	THAP9-AS1	-0.01909	0.712558	0.624874	0.000132	3.78872	0.000151	0/+
SNORD116-2	THAP9-AS1	-0.17682	0.000582	0.517767	0.002404	3.78838	0.000152	-/+
KLRK1-AS1	THAP9-AS1	0.01302	0.801587	0.64399	6.98e-05	3.78817	0.000152	0/+
AS3MT	THAP9-AS1	-0.16402	0.001437	0.527243	0.001931	3.78761	0.000152	-/+
CSGALNACT1	THAP9-AS1	0.175689	0.000632	0.730205	2.1e-06	3.78663	0.000153	#ERROR!
PLK2	THAP9-AS1	0.247977	1.16e-06	0.763563	3.71e-07	3.78569	0.000153	#ERROR!
FAM66B	THAP9-AS1	-0.07708	0.136279	0.587696	0.000405	3.78528	0.000154	0/+
NAP1L2	THAP9-AS1	-0.09376	0.06974	0.576246	0.000557	3.78273	0.000155	0/+
EDA2R	THAP9-AS1	-0.02967	0.566866	0.617542	0.000166	3.7819	0.000156	0/+
ANKRD13A	THAP9-AS1	0.287703	1.4e-08	0.780425	1.38e-07	3.78039	0.000157	#ERROR!
RGS11	THAP9-AS1	0.047866	0.355305	0.663001	3.55e-05	3.77963	0.000157	0/+
ADD2	THAP9-AS1	-0.07537	0.145174	0.587664	0.000405	3.7764	0.000159	0/+
ETV6	THAP9-AS1	0.383503	1.38e-14	0.818915	1.01e-08	3.77514	0.00016	#ERROR!
BMX	THAP9-AS1	0.006928	0.893629	0.638805	8.33e-05	3.77448	0.00016	0/+
DDB2	THAP9-AS1	0.334742	2.86e-11	0.799487	4.06e-08	3.7735	0.000161	#ERROR!
SLC9A8	THAP9-AS1	0.327571	7.9e-11	0.796554	4.95e-08	3.77339	0.000161	#ERROR!
ABRAXAS2	THAP9-AS1	0.459726	0	0.847141	9.74e-10	3.77322	0.000161	#ERROR!
FBLN1	THAP9-AS1	-0.17378	0.000725	0.517595	0.002414	3.7714	0.000162	-/+
CYP24A1	THAP9-AS1	0.060632	0.241481	0.669166	2.82e-05	3.77096	0.000163	0/+
AFF3	THAP9-AS1	-0.0772	0.135665	0.585648	0.000429	3.77015	0.000163	0/+
DGKG	THAP9-AS1	-0.08326	0.107465	0.581615	0.000481	3.77008	0.000163	0/+
HSPB8	THAP9-AS1	-0.19408	0.000156	0.501833	0.003429	3.76995	0.000163	-/+
NRAD1	THAP9-AS1	0.082029	0.112773	0.680756	1.81e-05	3.76987	0.000163	0/+
POLH	THAP9-AS1	0.417274	0	0.831378	3.8e-09	3.7693	0.000164	#ERROR!
ERMAP	THAP9-AS1	0.381231	2.04e-14	0.817449	1.13e-08	3.7662	0.000166	#ERROR!
MMRN1	THAP9-AS1	-0.05601	0.279301	0.5989	0.000293	3.7658	0.000166	0/+
BEX4	THAP9-AS1	-0.08891	0.08553	0.577216	0.000543	3.76542	0.000166	0/+
CXXC5	THAP9-AS1	0.073462	0.155677	0.675587	2.21e-05	3.76506	0.000167	0/+
CCN3	THAP9-AS1	0.017722	0.732302	0.644055	6.96e-05	3.76504	0.000167	0/+
NOVA1	THAP9-AS1	-0.05599	0.279472	0.598662	0.000295	3.76383	0.000167	0/+
NDN	THAP9-AS1	-0.12807	0.013064	0.549853	0.001114	3.76302	0.000168	-/+
SEPTIN5	THAP9-AS1	-0.05318	0.304321	0.600312	0.000281	3.76262	0.000168	0/+
RNF180	THAP9-AS1	-0.01407	0.786002	0.624748	0.000132	3.76238	0.000168	0/+
GAS1RR	THAP9-AS1	-0.11285	0.028888	0.56022	0.000855	3.76068	0.000169	-/+
PRICKLE4	THAP9-AS1	0.224245	1.17e-05	0.750712	7.47e-07	3.76057	0.00017	#ERROR!
LINC00491	THAP9-AS1	0.043598	0.399866	0.658395	4.2e-05	3.76	0.00017	0/+
KLRF1	THAP9-AS1	0.027424	0.596534	0.649046	5.86e-05	3.75934	0.00017	0/+
LOC101927752	THAP9-AS1	0.060069	0.245891	0.667522	3e-05	3.75884	0.000171	0/+
TRIM10	THAP9-AS1	0.419451	0	-0.29018	0.107169	-3.75714	0.000172	#ERROR!
GFPT2	THAP9-AS1	-0.07018	0.175032	0.588343	0.000398	3.75535	0.000173	0/+
CAVIN2	THAP9-AS1	-0.07125	0.168545	0.58761	0.000406	3.75511	0.000173	0/+
THBS2	THAP9-AS1	0.024223	0.640087	0.646628	6.37e-05	3.75448	0.000174	0/+
BACE1	THAP9-AS1	0.089949	0.081936	0.683284	1.63e-05	3.75348	0.000174	0/+
BEND6	THAP9-AS1	-0.01357	0.793444	0.623831	0.000136	3.75229	0.000175	0/+
BMP7	THAP9-AS1	0.011068	0.830837	0.638622	8.38e-05	3.75206	0.000175	0/+
PINLYP	THAP9-AS1	-0.02026	0.695768	0.619501	0.000156	3.75047	0.000177	0/+
NFKB1	THAP9-AS1	0.37185	9.66e-14	0.812683	1.61e-08	3.74974	0.000177	#ERROR!
PNLIPRP3	THAP9-AS1	0.050773	0.326812	0.661269	3.78e-05	3.74941	0.000177	0/+
STEAP3-AS1	THAP9-AS1	0.276124	5.47e-08	0.772975	2.16e-07	3.74914	0.000177	#ERROR!
SLCO3A1	THAP9-AS1	0.087562	0.090413	0.681452	1.76e-05	3.74832	0.000178	0/+
PLEKHG4	THAP9-AS1	0.333843	3.25e-11	0.797287	4.71e-08	3.74803	0.000178	#ERROR!
RDM1P5	THAP9-AS1	0.269791	1.12e-07	0.770111	2.55e-07	3.74797	0.000178	#ERROR!
P2RX2	THAP9-AS1	-0.10597	0.040261	0.563205	0.00079	3.74758	0.000179	-/+
ADGRA2	THAP9-AS1	-0.07855	0.128894	0.581745	0.000479	3.74722	0.000179	0/+
DCLRE1C	THAP9-AS1	0.466689	0	0.848135	8.89e-10	3.74635	0.000179	#ERROR!
LRRC37B	THAP9-AS1	0.474928	0	0.851068	6.78e-10	3.74614	0.00018	#ERROR!
SNN	THAP9-AS1	-0.06204	0.230714	0.592375	0.000354	3.74532	0.00018	0/+
LTB4R	THAP9-AS1	0.341426	1.08e-11	0.8	3.93e-08	3.74265	0.000182	#ERROR!
CASTOR2	THAP9-AS1	0.014249	0.783304	0.639296	8.19e-05	3.74178	0.000183	0/+
SERTAD2	THAP9-AS1	0.357613	9.37e-13	0.806452	2.51e-08	3.74136	0.000183	#ERROR!
RIMKLB	THAP9-AS1	0.101302	0.049973	0.68805	1.35e-05	3.74107	0.000183	#ERROR!
CPSF3	THAP9-AS1	0.46772	0	0.848135	8.89e-10	3.73971	0.000184	#ERROR!
TP53	THAP9-AS1	0.198565	0.000108	0.736804	1.52e-06	3.73915	0.000185	#ERROR!
FBRS	THAP9-AS1	0.175057	0.000662	0.72544	2.63e-06	3.73887	0.000185	#ERROR!
CPA4	THAP9-AS1	0.043093	0.405359	0.655477	4.66e-05	3.73668	0.000186	0/+
PGM5	THAP9-AS1	-0.15726	0.002257	0.524927	0.002038	3.73654	0.000187	-/+
SLC16A14	THAP9-AS1	0.127394	0.013556	0.701246	7.8e-06	3.73636	0.000187	#ERROR!
SUN2	THAP9-AS1	0.039991	0.440032	0.653592	4.99e-05	3.73573	0.000187	0/+
NAGK	THAP9-AS1	0.097591	0.059021	0.685484	1.5e-05	3.73549	0.000187	0/+
C14orf132	THAP9-AS1	-0.11059	0.032282	0.558284	0.000899	3.73495	0.000188	-/+
LOC100131315	THAP9-AS1	-0.12859	0.012693	0.545521	0.001242	3.73453	0.000188	-/+
PGLYRP4	THAP9-AS1	0.018648	0.718893	0.6408	7.78e-05	3.73244	0.00019	0/+
LOC100507053	THAP9-AS1	0.264629	1.99e-07	0.766523	3.14e-07	3.73186	0.00019	#ERROR!
SLC39A2	THAP9-AS1	-0.12055	0.019532	0.550811	0.001088	3.73146	0.00019	-/+
LOC100129434	THAP9-AS1	0.000357	0.99451	0.629599	0.000113	3.73	0.000191	0/+
KCTD15	THAP9-AS1	0.045675	0.377777	0.656158	4.55e-05	3.72968	0.000192	0/+
SPPL3	THAP9-AS1	0.291804	8.53e-09	0.778226	1.58e-07	3.72962	0.000192	#ERROR!
PRCP	THAP9-AS1	0.125419	0.01509	0.699413	8.43e-06	3.72836	0.000193	#ERROR!
TPGS2	THAP9-AS1	0.301733	2.48e-09	0.782258	1.24e-07	3.72669	0.000194	#ERROR!
AK4	THAP9-AS1	0.180479	0.000444	0.726906	2.46e-06	3.72629	0.000194	#ERROR!
ORAI3	THAP9-AS1	-0.01358	0.793236	0.620601	0.000151	3.72581	0.000195	0/+
AP3B2	THAP9-AS1	-0.1087	0.035367	0.558336	0.000897	3.7257	0.000195	-/+
GNAI1	THAP9-AS1	0.022698	0.661284	0.642229	7.41e-05	3.72426	0.000196	0/+
CD200R1	THAP9-AS1	0.048783	0.346151	0.657318	4.37e-05	3.72426	0.000196	0/+
CLDN1	THAP9-AS1	0.175074	0.000661	0.724056	2.81e-06	3.72409	0.000196	#ERROR!
MAMDC2	THAP9-AS1	-0.13366	0.009562	0.540189	0.001416	3.72239	0.000197	-/+
GNA14	THAP9-AS1	0.078389	0.129705	0.673632	2.38e-05	3.72203	0.000198	0/+
RORA	THAP9-AS1	0.128396	0.012832	0.700147	8.17e-06	3.72035	0.000199	#ERROR!
SPNS1	THAP9-AS1	0.091859	0.075623	0.680722	1.81e-05	3.71965	0.0002	0/+
LINC01798	THAP9-AS1	-0.02042	0.693477	0.615528	0.000177	3.71892	0.0002	0/+
SRPX2	THAP9-AS1	0.064033	0.216038	0.665323	3.26e-05	3.71885	0.0002	0/+
LOC100507144	THAP9-AS1	0.115831	0.024889	0.693315	1.09e-05	3.71773	0.000201	#ERROR!
MAP3K14	THAP9-AS1	0.07354	0.155239	0.670333	2.7e-05	3.71629	0.000202	0/+
COL5A3	THAP9-AS1	0.099422	0.0544	0.684384	1.56e-05	3.71573	0.000203	0/+
MRGPRX7P	THAP9-AS1	-0.11066	0.032171	0.555317	0.00097	3.71364	0.000204	-/+
LINC00659	THAP9-AS1	0.291937	8.39e-09	-0.41068	0.019556	-3.71343	0.000204	#ERROR!
RBBP8P1	THAP9-AS1	-0.00917	0.859559	0.621713	0.000146	3.71269	0.000205	0/+
HS3ST2	THAP9-AS1	-0.0771	0.136138	0.578161	0.000529	3.71265	0.000205	0/+
MBLAC1	THAP9-AS1	-0.06087	0.23961	0.588796	0.000393	3.71174	0.000206	0/+
SLC43A3	THAP9-AS1	0.232484	5.38e-06	0.75	7.75e-07	3.70857	0.000208	#ERROR!
CAPN11	THAP9-AS1	-0.0528	0.307854	0.593514	0.000343	3.70746	0.000209	0/+
FGF23	THAP9-AS1	0.018738	0.717596	-0.61479	0.000181	-3.7045	0.000212	0/-
MFAP5	THAP9-AS1	-0.08046	0.119829	0.57478	0.00058	3.70418	0.000212	0/+
EWSAT1	THAP9-AS1	0.060726	0.24075	0.661824	3.71e-05	3.70409	0.000212	0/+
SOD2	THAP9-AS1	0.302411	2.27e-09	0.780792	1.35e-07	3.70395	0.000212	#ERROR!
CDK13	THAP9-AS1	0.50031	0	0.857771	3.56e-10	3.70347	0.000213	#ERROR!
OCA2	THAP9-AS1	0.135217	0.008747	0.701964	7.56e-06	3.70339	0.000213	#ERROR!
RHPN2	THAP9-AS1	0.410107	0	-0.29069	0.10652	-3.70312	0.000213	#ERROR!
LINC00092	THAP9-AS1	-0.14393	0.005232	0.529924	0.001812	3.70268	0.000213	-/+
CDKN2C	THAP9-AS1	0.148272	0.004007	0.708578	5.68e-06	3.70256	0.000213	#ERROR!
GALNT18	THAP9-AS1	0.049391	0.340165	0.655059	4.73e-05	3.7012	0.000215	0/+
FAM66C	THAP9-AS1	0.000877	0.986497	0.626387	0.000125	3.70066	0.000215	0/+
FAM162B	THAP9-AS1	-0.01951	0.706449	0.613255	0.00019	3.69595	0.000219	0/+
LDLRAD3	THAP9-AS1	0.148122	0.004044	0.707845	5.86e-06	3.69592	0.000219	#ERROR!
PHACTR2	THAP9-AS1	0.293824	6.66e-09	0.776393	1.76e-07	3.69516	0.00022	#ERROR!
JAG2	THAP9-AS1	0.1896	0.000222	0.728372	2.29e-06	3.69441	0.00022	#ERROR!
PPP1R3G	THAP9-AS1	-0.01207	0.815782	0.617669	0.000166	3.69425	0.000221	0/+
F8	THAP9-AS1	0.005769	0.911339	0.62854	0.000117	3.6939	0.000221	0/+
GPATCH11	THAP9-AS1	0.400335	8.88e-16	0.82009	9.26e-09	3.69296	0.000222	#ERROR!
CDC123	THAP9-AS1	0.435538	0	0.833578	3.17e-09	3.69293	0.000222	#ERROR!
LOC100128398	THAP9-AS1	0.10472	0.042693	0.684751	1.54e-05	3.69224	0.000222	#ERROR!
MKNK2	THAP9-AS1	0.233364	4.94e-06	0.7489	8.21e-07	3.69124	0.000223	#ERROR!
LINC00847	THAP9-AS1	0.110535	0.032361	0.687683	1.37e-05	3.69052	0.000224	#ERROR!
KLF7	THAP9-AS1	0.084164	0.103677	0.673387	2.4e-05	3.69048	0.000224	0/+
TRIM62	THAP9-AS1	0.237649	3.26e-06	0.750733	7.46e-07	3.68948	0.000225	#ERROR!
TPST1	THAP9-AS1	0.126034	0.014597	0.695748	9.83e-06	3.68924	0.000225	#ERROR!
ANXA8L1	THAP9-AS1	-0.04115	0.426889	0.598698	0.000295	3.68916	0.000225	0/+
PVRIG	THAP9-AS1	0.33146	4.57e-11	0.791921	6.71e-08	3.68818	0.000226	#ERROR!
CSDC2	THAP9-AS1	-0.10017	0.052597	0.559069	0.00088	3.68764	0.000226	0/+
RAB3GAP2	THAP9-AS1	0.427693	0	0.830279	4.15e-09	3.68752	0.000226	#ERROR!
IKBKG	THAP9-AS1	0.033222	0.521281	0.644121	6.95e-05	3.68746	0.000227	0/+
LINC01342	THAP9-AS1	0.343614	7.85e-12	-0.35725	0.044721	-3.68725	0.000227	#ERROR!
HBG2	THAP9-AS1	0.179693	0.000471	0.722828	2.98e-06	3.68708	0.000227	#ERROR!
LINC00921	THAP9-AS1	0.173781	0.000725	0.71989	3.41e-06	3.68697	0.000227	#ERROR!
CFH	THAP9-AS1	0.047392	0.360088	0.652126	5.26e-05	3.6855	0.000228	0/+
SLC27A6	THAP9-AS1	-0.01745	0.736225	0.613128	0.000191	3.68454	0.000229	0/+
EBF3	THAP9-AS1	-0.03207	0.535899	0.603794	0.000253	3.68354	0.00023	0/+
PYGL	THAP9-AS1	0.083577	0.106118	0.672287	2.51e-05	3.68334	0.00023	0/+
KRBA2	THAP9-AS1	0.121605	0.018485	0.69271	1.12e-05	3.68235	0.000231	#ERROR!
NTN1	THAP9-AS1	-0.11848	0.02175	0.545088	0.001255	3.67965	0.000234	-/+
GIT1	THAP9-AS1	0.316225	3.74e-10	0.784824	1.05e-07	3.67946	0.000234	#ERROR!
TMEM241	THAP9-AS1	0.345135	6.26e-12	0.796921	4.83e-08	3.67867	0.000234	#ERROR!
TRABD2B	THAP9-AS1	-0.11461	0.026461	0.547654	0.001177	3.67835	0.000235	-/+
CASQ2	THAP9-AS1	-0.17444	0.000692	0.503299	0.003321	3.67741	0.000236	-/+
RBL1	THAP9-AS1	0.46858	0	0.844913	1.19e-09	3.67688	0.000236	#ERROR!
HSPA2	THAP9-AS1	-0.11607	0.024587	0.546188	0.001221	3.67526	0.000238	-/+
PRORP	THAP9-AS1	0.469195	0	0.845019	1.18e-09	3.67478	0.000238	#ERROR!
RNF217-AS1	THAP9-AS1	-0.00773	0.881469	0.617925	0.000164	3.67444	0.000238	0/+
ADGRD1	THAP9-AS1	-0.09249	0.073635	0.562552	0.000804	3.67416	0.000239	0/+
TSLP	THAP9-AS1	-0.04512	0.383617	0.594188	0.000336	3.67393	0.000239	0/+
PDE4DIPP6	THAP9-AS1	0.293915	6.58e-09	0.774732	1.95e-07	3.67366	0.000239	#ERROR!
ROBO1	THAP9-AS1	0.131073	0.011063	0.696728	9.44e-06	3.67301	0.00024	#ERROR!
IGFBP6	THAP9-AS1	-0.197	0.000123	0.484971	0.004905	3.67297	0.00024	-/+
EMX2OS	THAP9-AS1	-0.05057	0.32873	0.59048	0.000374	3.67268	0.00024	0/+
BHMT2	THAP9-AS1	-0.08065	0.118963	0.570434	0.000652	3.67256	0.00024	0/+
FOXN3-AS1	THAP9-AS1	-0.06941	0.179858	0.578002	0.000531	3.67247	0.00024	0/+
LINS1	THAP9-AS1	0.52799	0	0.865836	1.57e-10	3.67182	0.000241	#ERROR!
TMEM252	THAP9-AS1	-0.11703	0.023419	0.545005	0.001258	3.67167	0.000241	-/+
CSNK1A1	THAP9-AS1	0.300665	2.83e-09	0.777493	1.65e-07	3.67133	0.000241	#ERROR!
CPEB1	THAP9-AS1	-0.15206	0.003157	0.519292	0.002322	3.67068	0.000242	-/+
LOC101929710	THAP9-AS1	-0.03101	0.549358	0.602593	0.000263	3.66873	0.000244	0/+
RPL7AP45	THAP9-AS1	0.199371	0.000101	0.730692	2.05e-06	3.66822	0.000244	#ERROR!
MDGA1	THAP9-AS1	-0.0301	0.561146	0.603061	0.000259	3.66784	0.000245	0/+
NFIX	THAP9-AS1	-0.05767	0.265284	0.585044	0.000437	3.66671	0.000246	0/+
GSPT2	THAP9-AS1	-0.08492	0.100618	0.566716	0.000721	3.66651	0.000246	0/+
LOC283922	THAP9-AS1	0.289955	1.07e-08	0.772361	2.24e-07	3.66572	0.000247	#ERROR!
SULF1	THAP9-AS1	0.079161	0.125959	0.667889	2.96e-05	3.66551	0.000247	0/+
C16orf70	THAP9-AS1	0.339613	1.41e-11	0.793622	6e-08	3.66497	0.000247	#ERROR!
TM6SF1	THAP9-AS1	-0.05719	0.269265	0.584892	0.000438	3.66313	0.000249	0/+
TBX1	THAP9-AS1	0.00288	0.955678	0.623041	0.00014	3.66292	0.000249	0/+
NOTCH2	THAP9-AS1	0.180075	0.000458	0.720674	3.29e-06	3.66245	0.00025	#ERROR!
ANXA9	THAP9-AS1	0.033393	0.51914	0.641247	7.67e-05	3.66193	0.00025	0/+
HSD17B7P2	THAP9-AS1	0.482164	0	0.848946	8.25e-10	3.66034	0.000252	#ERROR!
PIK3IP1	THAP9-AS1	0.082364	0.111306	0.668988	2.84e-05	3.65929	0.000253	0/+
SNED1	THAP9-AS1	0.051959	0.31562	0.65176	5.32e-05	3.65922	0.000253	0/+
PTGES	THAP9-AS1	0.038551	0.456685	0.643937	6.99e-05	3.659	0.000253	0/+
RAB9B	THAP9-AS1	-0.02973	0.565977	0.601999	0.000267	3.65757	0.000255	0/+
KIAA1586	THAP9-AS1	0.242867	1.95e-06	0.750367	7.6e-07	3.65736	0.000255	#ERROR!
MRC2	THAP9-AS1	-0.02957	0.568078	0.601906	0.000268	3.65603	0.000256	0/+
CADM3	THAP9-AS1	-0.21235	3.39e-05	0.469941	0.00665	3.65561	0.000257	-/+
ITIH3	THAP9-AS1	-0.11138	0.031057	0.546755	0.001204	3.65538	0.000257	-/+
PLEKHM2	THAP9-AS1	0.234605	4.39e-06	0.746334	9.39e-07	3.65532	0.000257	#ERROR!
PMS2	THAP9-AS1	0.362729	4.19e-13	0.80231	3.35e-08	3.65263	0.00026	#ERROR!
PTENP1-AS	THAP9-AS1	-0.13809	0.007408	0.527035	0.00194	3.65246	0.00026	-/+
PTPRA	THAP9-AS1	0.346233	5.32e-12	0.795455	5.32e-08	3.65221	0.00026	#ERROR!
NLGN1	THAP9-AS1	-0.0693	0.180563	0.575383	0.000571	3.65213	0.00026	0/+
MYLK4	THAP9-AS1	0.308627	1.02e-09	0.77941	1.47e-07	3.65163	0.000261	#ERROR!
PSKH1	THAP9-AS1	0.047218	0.36186	0.648094	6.05e-05	3.65119	0.000261	0/+
ABCA1	THAP9-AS1	0.115514	0.02529	0.686217	1.45e-05	3.65113	0.000261	#ERROR!
RABGAP1L	THAP9-AS1	0.455111	0	0.838343	2.12e-09	3.64964	0.000263	#ERROR!
KRT79	THAP9-AS1	0.088637	0.086511	0.671292	2.6e-05	3.64852	0.000264	0/+
SALL2	THAP9-AS1	-0.09914	0.055091	0.554303	0.000995	3.6476	0.000265	0/+
AIF1L	THAP9-AS1	0.061417	0.235429	0.655792	4.61e-05	3.6469	0.000265	0/+
CYP8B1	THAP9-AS1	-0.02927	0.572056	0.600671	0.000278	3.64475	0.000268	0/+
ARSI	THAP9-AS1	-0.04941	0.340024	0.587351	0.000409	3.64266	0.00027	0/+
HMCN1	THAP9-AS1	0.009749	0.850745	0.624748	0.000132	3.64239	0.00027	0/+
MAP3K3	THAP9-AS1	-0.01399	0.787203	0.609971	0.00021	3.64167	0.000271	0/+
GNB4	THAP9-AS1	0.050261	0.331716	0.64846	5.98e-05	3.63901	0.000274	0/+
LRRK1	THAP9-AS1	0.257451	4.32e-07	0.755499	5.78e-07	3.63867	0.000274	#ERROR!
TSPAN7	THAP9-AS1	-0.02999	0.56268	0.599395	0.000289	3.63832	0.000274	0/+
ELF1	THAP9-AS1	0.428092	0	0.827346	5.26e-09	3.63787	0.000275	#ERROR!
KCTD21	THAP9-AS1	0.266421	1.63e-07	0.759531	4.64e-07	3.63782	0.000275	#ERROR!
GNAL	THAP9-AS1	0.02971	0.566285	0.636114	9.11e-05	3.63683	0.000276	0/+
SCN4B	THAP9-AS1	-0.11897	0.021209	0.538722	0.001467	3.63675	0.000276	-/+
DEGS1	THAP9-AS1	0.102836	0.046586	0.677786	2.03e-05	3.63635	0.000277	#ERROR!
ADGRL2	THAP9-AS1	0.109726	0.033657	0.681452	1.76e-05	3.63557	0.000277	#ERROR!
SLITRK4	THAP9-AS1	-0.02947	0.569455	0.599083	0.000291	3.63326	0.00028	0/+
DIO1	THAP9-AS1	0.025141	0.627459	0.632875	0.000102	3.63255	0.000281	0/+
SUV39H2	THAP9-AS1	0.508115	0	0.856724	3.94e-10	3.63084	0.000283	#ERROR!
MIEF2	THAP9-AS1	0.279855	3.55e-08	0.765029	3.42e-07	3.63081	0.000283	#ERROR!
RANBP10	THAP9-AS1	0.336087	2.36e-11	0.789589	7.79e-08	3.63061	0.000283	#ERROR!
SSBP2	THAP9-AS1	0.01131	0.827208	0.624267	0.000134	3.63056	0.000283	0/+
MEDAG	THAP9-AS1	-0.0494	0.340078	0.585777	0.000428	3.63054	0.000283	0/+
MIR4787	THAP9-AS1	-0.05157	0.319303	0.584349	0.000445	3.63054	0.000283	0/+
SLC35F6	THAP9-AS1	0.216333	2.38e-05	0.735337	1.64e-06	3.62949	0.000284	#ERROR!
COG5	THAP9-AS1	0.428605	0	0.826979	5.42e-09	3.62886	0.000285	#ERROR!
TRO	THAP9-AS1	0.104454	0.043226	0.677848	2.02e-05	3.62869	0.000285	#ERROR!
LINC01303	THAP9-AS1	0.002486	0.961732	0.618613	0.000161	3.62861	0.000285	0/+
LIPN	THAP9-AS1	-0.02313	0.655253	0.602514	0.000263	3.62835	0.000285	0/+
HOXA4	THAP9-AS1	-0.11183	0.030371	0.542522	0.001337	3.62738	0.000286	-/+
KRCC1	THAP9-AS1	0.314508	4.7e-10	0.780059	1.41e-07	3.62715	0.000287	#ERROR!
ARMCX1	THAP9-AS1	-0.06998	0.176297	0.571586	0.000633	3.62709	0.000287	0/+
CABYR	THAP9-AS1	0.14824	0.004015	0.701008	7.88e-06	3.62695	0.000287	#ERROR!
ATP1A2	THAP9-AS1	-0.16473	0.001368	0.503162	0.003331	3.62614	0.000288	-/+
GASK1A	THAP9-AS1	-0.1458	0.004668	0.517459	0.002421	3.62579	0.000288	-/+
CLCA4-AS1	THAP9-AS1	0.311473	7.02e-10	0.778583	1.55e-07	3.62517	0.000289	#ERROR!
FER1L5	THAP9-AS1	0.126697	0.014081	0.689328	1.28e-05	3.62369	0.00029	#ERROR!
TPRG1	THAP9-AS1	0.148788	0.00388	0.700944	7.9e-06	3.62349	0.000291	#ERROR!
MTERF1	THAP9-AS1	0.246931	1.29e-06	0.749267	8.06e-07	3.62292	0.000291	#ERROR!
ANGPTL1	THAP9-AS1	-0.10268	0.046918	0.548387	0.001156	3.6228	0.000291	-/+
SPATA18	THAP9-AS1	0.229419	7.19e-06	0.740836	1.24e-06	3.62097	0.000293	#ERROR!
FOXN3	THAP9-AS1	0.126894	0.013931	0.68915	1.29e-05	3.62097	0.000294	#ERROR!
DEPDC5	THAP9-AS1	0.46983	0	0.842163	1.52e-09	3.62078	0.000294	#ERROR!
BNIP3	THAP9-AS1	0.011243	0.828211	0.622801	0.000141	3.61881	0.000296	0/+
FZD10-AS1	THAP9-AS1	-0.01689	0.744348	0.605261	0.000242	3.61871	0.000296	0/+
FYB2	THAP9-AS1	0.094625	0.067191	0.671196	2.61e-05	3.61722	0.000298	0/+
CCDC80	THAP9-AS1	-0.09731	0.059754	0.55132	0.001074	3.61665	0.000298	0/+
NUTM2A-AS1	THAP9-AS1	0.317409	3.19e-10	0.780497	1.38e-07	3.61656	0.000299	#ERROR!
C20orf204	THAP9-AS1	0.178956	0.000498	0.71557	4.16e-06	3.61517	0.0003	#ERROR!
KANK3	THAP9-AS1	-0.10329	0.045619	0.546788	0.001203	3.6144	0.000301	-/+
MAST4	THAP9-AS1	0.137315	0.007748	0.693915	1.06e-05	3.61354	0.000302	#ERROR!
PRRG1	THAP9-AS1	0.303776	1.91e-09	0.774194	2.01e-07	3.61233	0.000303	#ERROR!
NDST1-AS1	THAP9-AS1	0.081619	0.114588	0.663145	3.53e-05	3.61015	0.000306	0/+
TENT5B	THAP9-AS1	-0.04301	0.406294	0.587243	0.00041	3.60953	0.000307	0/+
EML6	THAP9-AS1	0.33529	2.65e-11	0.787645	8.82e-08	3.60923	0.000307	#ERROR!
IRAK4	THAP9-AS1	0.389638	4.88e-15	0.810117	1.94e-08	3.60708	0.00031	#ERROR!
MBP	THAP9-AS1	0.308997	9.72e-10	0.776026	1.8e-07	3.60643	0.00031	#ERROR!
SLC2A4	THAP9-AS1	-0.12863	0.012669	0.527174	0.001934	3.60494	0.000312	-/+
FRMD6-AS1	THAP9-AS1	0.164472	0.001393	0.707091	6.06e-06	3.60389	0.000313	#ERROR!
ENPP1	THAP9-AS1	0.208192	4.85e-05	0.728989	2.23e-06	3.6035	0.000314	#ERROR!
ANKRD6	THAP9-AS1	0.031614	0.541657	0.633181	0.0001	3.60248	0.000315	0/+
KCNMA1	THAP9-AS1	-0.14351	0.005366	0.515762	0.002517	3.60234	0.000315	-/+
MARCO	THAP9-AS1	0.009097	0.860624	0.619362	0.000157	3.60142	0.000316	0/+
HCFC2	THAP9-AS1	0.236351	3.7e-06	0.74237	1.15e-06	3.60122	0.000317	#ERROR!
FBLN2	THAP9-AS1	-0.07577	0.14307	0.56415	0.000771	3.60112	0.000317	0/+
CRISPLD1	THAP9-AS1	0.039014	0.451284	0.637338	8.75e-05	3.60027	0.000318	0/+
LCN6	THAP9-AS1	-0.16519	0.001326	0.498808	0.003662	3.59922	0.000319	-/+
MINDY1	THAP9-AS1	0.094888	0.066431	0.669355	2.8e-05	3.59904	0.000319	0/+
ATP8B4	THAP9-AS1	0.09742	0.059467	0.670762	2.66e-05	3.59902	0.000319	0/+
PPP1R3F	THAP9-AS1	-0.03884	0.453314	0.588505	0.000396	3.59821	0.00032	0/+
RFX7	THAP9-AS1	0.506717	0	0.854472	4.91e-10	3.59799	0.000321	#ERROR!
PARP6	THAP9-AS1	0.187503	0.000261	0.718109	3.7e-06	3.59693	0.000322	#ERROR!
DENND2C	THAP9-AS1	0.096207	0.062724	0.669844	2.75e-05	3.5968	0.000322	0/+
PLSCR4	THAP9-AS1	0.058064	0.262037	0.648094	6.05e-05	3.5964	0.000323	0/+
DPYSL3	THAP9-AS1	-0.06731	0.193419	0.569282	0.000673	3.59637	0.000323	0/+
PKNOX2	THAP9-AS1	-0.19598	0.000134	0.473974	0.006136	3.59567	0.000324	-/+
AKNAD1	THAP9-AS1	0.004444	0.931645	0.615753	0.000176	3.59547	0.000324	0/+
ANKS1B	THAP9-AS1	-0.04975	0.336627	0.580675	0.000493	3.59337	0.000326	0/+
CA12	THAP9-AS1	0.026549	0.608304	0.629032	0.000115	3.59329	0.000327	0/+
FOXL2	THAP9-AS1	0.008688	0.866833	0.618055	0.000164	3.59281	0.000327	0/+
CYTH3	THAP9-AS1	0.163275	0.001511	0.705279	6.56e-06	3.59187	0.000328	#ERROR!
APLF	THAP9-AS1	0.300192	3.01e-09	0.770894	2.44e-07	3.59097	0.000329	#ERROR!
CYLD	THAP9-AS1	0.273451	7.43e-08	0.758798	4.83e-07	3.5909	0.00033	#ERROR!
TCHH	THAP9-AS1	0.085263	0.09923	0.662995	3.55e-05	3.59032	0.00033	0/+
CAPN8	THAP9-AS1	0.377873	3.57e-14	-0.30499	0.089635	-3.58989	0.000331	#ERROR!
ANKRD31	THAP9-AS1	0.137503	0.007664	0.691483	1.17e-05	3.58902	0.000332	#ERROR!
ASPA	THAP9-AS1	-0.05532	0.285262	0.576246	0.000557	3.58798	0.000333	0/+
CYP1B1	THAP9-AS1	-0.10203	0.048344	0.543988	0.00129	3.5879	0.000333	-/+
TOPBP1	THAP9-AS1	0.574759	0	0.877933	4.14e-11	3.58733	0.000334	#ERROR!
C7	THAP9-AS1	-0.16499	0.001345	0.497067	0.003801	3.58651	0.000335	-/+
GARRE1	THAP9-AS1	0.235892	3.87e-06	0.740836	1.24e-06	3.5865	0.000335	#ERROR!
GREM2	THAP9-AS1	-0.14801	0.004073	0.509944	0.002868	3.58574	0.000336	-/+
TIAM1	THAP9-AS1	0.055113	0.287102	0.645037	6.73e-05	3.58485	0.000337	0/+
CDH19	THAP9-AS1	-0.10748	0.037493	0.539639	0.001435	3.58463	0.000338	-/+
CFLAR	THAP9-AS1	0.355656	1.27e-12	0.794355	5.72e-08	3.58302	0.00034	#ERROR!
SH3RF3	THAP9-AS1	-0.05974	0.248511	0.572581	0.000616	3.58273	0.00034	0/+
LRRC37A2	THAP9-AS1	0.422955	0	0.82174	8.16e-09	3.58123	0.000342	#ERROR!
AMFR	THAP9-AS1	0.187137	0.000268	0.716276	4.03e-06	3.57983	0.000344	#ERROR!
SNTB2	THAP9-AS1	0.278861	3.99e-08	0.760264	4.46e-07	3.57886	0.000345	#ERROR!
ADCY4	THAP9-AS1	0.192456	0.000177	0.718842	3.58e-06	3.57867	0.000345	#ERROR!
SETMAR	THAP9-AS1	0.264691	1.98e-07	0.753666	6.38e-07	3.57809	0.000346	#ERROR!
LINC01088	THAP9-AS1	0.018461	0.721595	0.622239	0.000143	3.57782	0.000346	0/+
METTL9	THAP9-AS1	0.338575	1.64e-11	0.786657	9.39e-08	3.57747	0.000347	#ERROR!
TSC22D1-AS1	THAP9-AS1	0.105466	0.04123	0.672717	2.47e-05	3.57602	0.000349	#ERROR!
CCL16	THAP9-AS1	0.063559	0.219469	0.648767	5.91e-05	3.57447	0.000351	0/+
CHL1	THAP9-AS1	-0.06813	0.188022	0.565536	0.000743	3.5727	0.000353	0/+
KRT18P28	THAP9-AS1	0.222352	1.39e-05	-0.44866	0.010007	-3.57259	0.000353	#ERROR!
GAS6-DT	THAP9-AS1	0.025882	0.617351	0.626135	0.000127	3.57257	0.000353	0/+
SCARA5	THAP9-AS1	-0.11347	0.028013	0.533358	0.00167	3.57076	0.000356	-/+
PHLDB2	THAP9-AS1	0.017035	0.742311	0.620475	0.000152	3.57053	0.000356	0/+
CRIP2	THAP9-AS1	-0.01767	0.73307	0.598607	0.000296	3.57004	0.000357	0/+
PDZRN3	THAP9-AS1	-0.08184	0.113625	0.555718	0.00096	3.57001	0.000357	0/+
S100P	THAP9-AS1	0.315926	3.89e-10	-0.364	0.040555	-3.56986	0.000357	#ERROR!
MYO5A	THAP9-AS1	0.112559	0.029306	0.675953	2.18e-05	3.56975	0.000357	#ERROR!
CD34	THAP9-AS1	-0.05874	0.256486	0.571481	0.000634	3.56947	0.000358	0/+
LINC00173	THAP9-AS1	0.041461	0.423392	0.634971	9.47e-05	3.56789	0.00036	0/+
ABRA	THAP9-AS1	-0.04859	0.348034	0.577776	0.000534	3.56554	0.000363	0/+
E2F3	THAP9-AS1	0.480181	0	0.842742	1.44e-09	3.56348	0.000366	#ERROR!
KRT18P54	THAP9-AS1	0.070185	0.175013	-0.56285	0.000798	-3.56328	0.000366	0/-
SLFN5	THAP9-AS1	0.229603	7.07e-06	0.735704	1.61e-06	3.56316	0.000366	#ERROR!
MAP6D1	THAP9-AS1	0.254357	5.99e-07	0.747479	8.84e-07	3.56252	0.000367	#ERROR!
KCNMA1-AS1	THAP9-AS1	-0.03046	0.556491	0.589299	0.000387	3.56208	0.000368	0/+
RERGL	THAP9-AS1	-0.04705	0.363556	0.578079	0.00053	3.56004	0.000371	0/+
LGI1	THAP9-AS1	-0.1444	0.005084	0.508894	0.002936	3.56002	0.000371	-/+
RAB11FIP5	THAP9-AS1	0.214495	2.81e-05	0.728006	2.33e-06	3.55971	0.000371	#ERROR!
MORC3	THAP9-AS1	0.496435	0	0.848607	8.51e-10	3.5597	0.000371	#ERROR!
GPX3	THAP9-AS1	-0.1631	0.001529	0.494501	0.004016	3.55959	0.000371	-/+
DDX59	THAP9-AS1	0.362365	4.44e-13	0.795455	5.32e-08	3.55927	0.000372	#ERROR!
IGHVIII-76-1	THAP9-AS1	0.102812	0.046638	-0.53934	0.001446	-3.55873	0.000373	#ERROR!
GAS6	THAP9-AS1	0.051167	0.323067	0.639663	8.09e-05	3.5587	0.000373	0/+
ATRIP	THAP9-AS1	0.286421	1.64e-08	0.762019	4.04e-07	3.55848	0.000373	#ERROR!
MAL	THAP9-AS1	-0.23862	2.97e-06	0.432551	0.013415	3.55844	0.000373	-/+
GPR26	THAP9-AS1	-0.06435	0.213785	0.565883	0.000737	3.55613	0.000376	0/+
CALB2	THAP9-AS1	-0.03033	0.558181	0.588559	0.000395	3.55571	0.000377	0/+
GGA3	THAP9-AS1	0.450734	0	0.831012	3.91e-09	3.55559	0.000377	#ERROR!
EPM2AIP1	THAP9-AS1	0.178831	0.000502	0.709677	5.41e-06	3.55551	0.000377	#ERROR!
HOXA7	THAP9-AS1	0.140284	0.006509	0.689459	1.27e-05	3.55526	0.000378	#ERROR!
DCLRE1B	THAP9-AS1	0.357011	1.03e-12	0.792889	6.3e-08	3.55525	0.000378	#ERROR!
DSG2	THAP9-AS1	0.439429	0	-0.22984	0.205707	-3.55442	0.000379	#ERROR!
ACAP2	THAP9-AS1	0.498229	0	0.848974	8.23e-10	3.5543	0.000379	#ERROR!
SNORD114-3	THAP9-AS1	-0.01799	0.728478	0.596263	0.000317	3.55328	0.00038	0/+
H4-16	THAP9-AS1	0.133678	0.009551	0.685672	1.49e-05	3.55299	0.000381	#ERROR!
IRAG1-AS1	THAP9-AS1	0.075556	0.144196	0.653204	5.06e-05	3.55253	0.000382	0/+
STX1B	THAP9-AS1	0.007259	0.888584	0.61217	0.000196	3.55232	0.000382	0/+
PCAT19	THAP9-AS1	0.028763	0.578725	0.625057	0.000131	3.54912	0.000387	0/+
KCNG1	THAP9-AS1	-0.1208	0.019277	0.524849	0.002042	3.54869	0.000387	-/+
F8A1	THAP9-AS1	0.140685	0.006356	0.688846	1.31e-05	3.54731	0.000389	#ERROR!
ATAD2	THAP9-AS1	0.478921	0	0.841276	1.64e-09	3.54634	0.000391	#ERROR!
RIIAD1	THAP9-AS1	-0.14879	0.00388	0.503539	0.003304	3.54633	0.000391	-/+
BHLHE40-AS1	THAP9-AS1	0.220848	1.59e-05	0.72974	2.15e-06	3.54475	0.000393	#ERROR!
LOC646588	THAP9-AS1	-0.09337	0.070924	0.544038	0.001288	3.5442	0.000394	0/+
BBS10	THAP9-AS1	0.2028	7.65e-05	0.720674	3.29e-06	3.54361	0.000395	#ERROR!
IGF2BP3	THAP9-AS1	0.123897	0.016373	0.679322	1.91e-05	3.5432	0.000395	#ERROR!
TFAP2C	THAP9-AS1	0.154017	0.002786	0.695517	9.93e-06	3.54318	0.000395	#ERROR!
PRDM2	THAP9-AS1	0.346299	5.26e-12	0.78739	8.97e-08	3.54309	0.000395	#ERROR!
MAU2	THAP9-AS1	0.345527	5.91e-12	0.787023	9.18e-08	3.54265	0.000396	#ERROR!
CRYAB	THAP9-AS1	-0.18443	0.00033	0.475073	0.006002	3.54243	0.000396	-/+
PHF6	THAP9-AS1	0.577769	0	0.876913	4.65e-11	3.54231	0.000397	#ERROR!
RBM20	THAP9-AS1	0.021038	0.684684	0.619432	0.000157	3.54182	0.000397	0/+
DPYD	THAP9-AS1	0.140875	0.006284	0.68805	1.35e-05	3.53871	0.000402	#ERROR!
H2BU1	THAP9-AS1	0.179075	0.000493	0.708139	5.79e-06	3.53866	0.000402	#ERROR!
LPAR1	THAP9-AS1	0.07206	0.163746	0.64956	5.75e-05	3.53835	0.000403	0/+
SETBP1	THAP9-AS1	-0.06706	0.195039	0.561584	0.000825	3.53812	0.000403	0/+
ITGA10	THAP9-AS1	0.176087	0.000614	0.706443	6.23e-06	3.53711	0.000405	#ERROR!
CLEC1A	THAP9-AS1	0.011584	0.823088	0.612959	0.000192	3.53689	0.000405	0/+
IL17D	THAP9-AS1	-0.05206	0.314651	0.571481	0.000634	3.53571	0.000407	0/+
HCAR2	THAP9-AS1	0.068782	0.183819	0.64727	6.23e-05	3.53504	0.000408	0/+
HOXD10	THAP9-AS1	0.091835	0.0757	0.660537	3.88e-05	3.53491	0.000408	0/+
PLD2	THAP9-AS1	0.299725	3.19e-09	0.766129	3.21e-07	3.53491	0.000408	#ERROR!
PYGO1	THAP9-AS1	0.00799	0.877448	0.610337	0.000208	3.5339	0.000409	0/+
CPEB4	THAP9-AS1	0.252652	7.16e-07	0.744135	1.05e-06	3.53374	0.00041	#ERROR!
LOC105369201	THAP9-AS1	0.077444	0.134409	0.652086	5.26e-05	3.53315	0.000411	0/+
LDOC1	THAP9-AS1	-0.08949	0.083501	0.545138	0.001253	3.53239	0.000412	0/+
TCF7L1	THAP9-AS1	-0.01215	0.814531	0.597195	0.000308	3.53119	0.000414	0/+
SHE	THAP9-AS1	-0.05089	0.325682	0.571481	0.000634	3.52979	0.000416	0/+
IPPK	THAP9-AS1	0.250125	9.31e-07	0.742553	1.14e-06	3.52952	0.000416	#ERROR!
LGI3	THAP9-AS1	-0.11152	0.030849	0.528873	0.001858	3.52931	0.000417	-/+
SNCA	THAP9-AS1	0.009055	0.86127	0.610337	0.000208	3.52853	0.000418	0/+
ACSS3	THAP9-AS1	-0.00525	0.919309	0.601283	0.000273	3.52853	0.000418	0/+
CRKL	THAP9-AS1	0.407302	2.22e-16	0.81195	1.7e-08	3.52828	0.000418	#ERROR!
TAZ	THAP9-AS1	0.398134	1.11e-15	0.808175	2.23e-08	3.52809	0.000419	#ERROR!
FUT11	THAP9-AS1	0.214766	2.74e-05	0.725073	2.68e-06	3.52699	0.00042	#ERROR!
C1orf35	THAP9-AS1	0.255188	5.49e-07	0.744706	1.02e-06	3.52654	0.000421	#ERROR!
TPPP3	THAP9-AS1	-0.05845	0.258894	0.565851	0.000737	3.52605	0.000422	0/+
ELMO2	THAP9-AS1	0.238855	2.9e-06	0.736804	1.52e-06	3.52595	0.000422	#ERROR!
IL20RB	THAP9-AS1	0.270742	1.01e-07	0.751971	6.98e-07	3.52554	0.000423	#ERROR!
C3orf52	THAP9-AS1	0.461054	0	-0.19835	0.276483	-3.5248	0.000424	#ERROR!
LOC339803	THAP9-AS1	-0.05857	0.257861	0.565484	0.000744	3.52398	0.000425	0/+
MIR646HG	THAP9-AS1	-0.07064	0.172204	0.557045	0.000928	3.52297	0.000427	0/+
TMEM74	THAP9-AS1	-0.0257	0.619826	0.587308	0.00041	3.52272	0.000427	0/+
ADARB2	THAP9-AS1	-0.03482	0.501487	0.581278	0.000485	3.52257	0.000427	0/+
CXCL12	THAP9-AS1	-0.14449	0.005057	0.503299	0.003321	3.52257	0.000427	-/+
TMEM47	THAP9-AS1	-0.00816	0.874826	0.598607	0.000296	3.52214	0.000428	0/+
NHLRC1	THAP9-AS1	-0.03339	0.519131	0.582118	0.000474	3.5218	0.000429	0/+
NINJ2-AS1	THAP9-AS1	0.081162	0.116639	0.652919	5.11e-05	3.52161	0.000429	0/+
TNNT3	THAP9-AS1	-0.08605	0.096145	0.546038	0.001226	3.52136	0.000429	0/+
PRICKLE1	THAP9-AS1	-0.04247	0.41219	0.575985	0.000561	3.5211	0.00043	0/+
TRPS1	THAP9-AS1	0.116962	0.023502	0.673021	2.44e-05	3.52017	0.000431	#ERROR!
ADH1B	THAP9-AS1	-0.13531	0.008701	0.509897	0.002871	3.52013	0.000431	-/+
EVC	THAP9-AS1	-0.11906	0.021107	0.521994	0.002182	3.51996	0.000432	-/+
LPAR3	THAP9-AS1	0.035155	0.497315	0.625413	0.000129	3.51982	0.000432	0/+
HDGFL3	THAP9-AS1	0.026606	0.60754	0.620108	0.000153	3.51929	0.000433	0/+
SGMS1	THAP9-AS1	0.364147	3.35e-13	0.793255	6.15e-08	3.5189	0.000433	#ERROR!
MIR708	THAP9-AS1	-0.02014	0.697423	0.590403	0.000375	3.51859	0.000434	0/+
NATD1	THAP9-AS1	0.030638	0.554206	0.622434	0.000142	3.51804	0.000435	0/+
NEXMIF	THAP9-AS1	-0.14844	0.003966	0.49945	0.003611	3.51699	0.000436	-/+
CNTN1	THAP9-AS1	-0.12187	0.018227	0.519428	0.002315	3.51661	0.000437	-/+
SGCA	THAP9-AS1	-0.19928	0.000102	0.458944	0.008239	3.51621	0.000438	-/+
LOC102723809	THAP9-AS1	0.458321	0	0.831545	3.75e-09	3.51611	0.000438	#ERROR!
GYS2	THAP9-AS1	0.144086	0.005182	0.687363	1.39e-05	3.51563	0.000439	#ERROR!
PTPN20	THAP9-AS1	0.059309	0.251921	0.639355	8.17e-05	3.51492	0.00044	0/+
KLK10	THAP9-AS1	0.112195	0.029836	0.669721	2.76e-05	3.51425	0.000441	#ERROR!
TPO	THAP9-AS1	0.054458	0.292873	0.63623	9.08e-05	3.51291	0.000443	0/+
NTRK3	THAP9-AS1	-0.07764	0.133442	0.550687	0.001091	3.51219	0.000444	0/+
SLC7A2	THAP9-AS1	0.084195	0.10355	0.653592	4.99e-05	3.51214	0.000445	0/+
KDM4B	THAP9-AS1	0.285343	1.86e-08	0.757584	5.16e-07	3.51154	0.000446	#ERROR!
OSCAR	THAP9-AS1	-0.06668	0.197627	0.55799	0.000905	3.50981	0.000448	0/+
PRG4	THAP9-AS1	0.009012	0.861914	0.607883	0.000224	3.50908	0.00045	0/+
CBX6	THAP9-AS1	-0.17472	0.000678	0.477639	0.005699	3.50862	0.00045	-/+
BCAS3	THAP9-AS1	0.180753	0.000435	0.706012	6.35e-06	3.50849	0.000451	#ERROR!
FEM1B	THAP9-AS1	0.341436	1.08e-11	0.782625	1.21e-07	3.50832	0.000451	#ERROR!
S1PR1	THAP9-AS1	-0.06057	0.241947	0.56195	0.000817	3.50798	0.000452	0/+
PCP4	THAP9-AS1	-0.06137	0.23576	0.561371	0.000829	3.50778	0.000452	0/+
RNF170	THAP9-AS1	0.460139	0	0.831745	3.68e-09	3.50777	0.000452	#ERROR!
LINC01354	THAP9-AS1	-0.09153	0.076677	0.540119	0.001418	3.50691	0.000453	0/+
CSE1L	THAP9-AS1	0.436297	0	0.822214	7.87e-09	3.50617	0.000455	#ERROR!
CEP126	THAP9-AS1	0.245717	1.46e-06	0.738337	1.41e-06	3.50617	0.000455	#ERROR!
CD44	THAP9-AS1	0.172071	0.00082	0.701246	7.8e-06	3.50609	0.000455	#ERROR!
RPL7AP64	THAP9-AS1	-0.11863	0.021582	0.520135	0.002277	3.5049	0.000457	-/+
MFSD1	THAP9-AS1	0.306841	1.29e-09	0.766862	3.08e-07	3.50439	0.000458	#ERROR!
H6PD	THAP9-AS1	0.093382	0.070881	0.657991	4.26e-05	3.50437	0.000458	0/+
AHNAK2	THAP9-AS1	0.004018	0.938179	0.604106	0.000251	3.50417	0.000458	0/+
LOC112268124	THAP9-AS1	0.277209	4.83e-08	0.753071	6.59e-07	3.50309	0.00046	#ERROR!
DMD	THAP9-AS1	-0.06698	0.195617	0.556818	0.000933	3.50276	0.00046	0/+
KRT8P35	THAP9-AS1	0.355155	1.37e-12	-0.31305	0.081063	-3.50256	0.000461	#ERROR!
PITX2	THAP9-AS1	0.100532	0.051748	0.661835	3.7e-05	3.50231	0.000461	0/+
SCYL3	THAP9-AS1	0.403784	4.44e-16	0.808725	2.14e-08	3.50217	0.000461	#ERROR!
GTF3C2	THAP9-AS1	0.458235	0	0.830645	4.03e-09	3.50201	0.000462	#ERROR!
LRRN4CL	THAP9-AS1	-0.15096	0.003385	0.495235	0.003953	3.5018	0.000462	-/+
FBXL7	THAP9-AS1	-0.02608	0.614652	0.584311	0.000446	3.50166	0.000462	0/+
GRIP1	THAP9-AS1	0.187182	0.000267	0.708211	5.77e-06	3.49713	0.00047	#ERROR!
EFCAB10	THAP9-AS1	0.399255	8.88e-16	0.806419	2.52e-08	3.49597	0.000472	#ERROR!
SLC16A7	THAP9-AS1	-0.01019	0.844025	0.593842	0.00034	3.49513	0.000474	0/+
IGF2	THAP9-AS1	-0.02631	0.611573	0.583211	0.00046	3.4944	0.000475	0/+
ADRA2C	THAP9-AS1	-0.07546	0.144725	0.54972	0.001118	3.49416	0.000476	0/+
TLX1NB	THAP9-AS1	0.26309	2.35e-07	-0.40028	0.023204	-3.49326	0.000477	#ERROR!
ARHGAP10	THAP9-AS1	0.057421	0.267361	0.63563	9.26e-05	3.49286	0.000478	0/+
RAP2A	THAP9-AS1	0.399876	8.88e-16	0.806452	2.51e-08	3.49272	0.000478	#ERROR!
MCM9	THAP9-AS1	0.498003	0	0.845385	1.14e-09	3.49177	0.00048	#ERROR!
C10orf99	THAP9-AS1	-0.01652	0.749763	0.589231	0.000388	3.4913	0.000481	0/+
LOC101929427	THAP9-AS1	0.125986	0.014634	0.674863	2.27e-05	3.49103	0.000481	#ERROR!
MAPT	THAP9-AS1	-0.05757	0.266128	0.561584	0.000825	3.4901	0.000483	0/+
LSM14B	THAP9-AS1	0.130652	0.011326	0.677298	2.07e-05	3.48973	0.000484	#ERROR!
CH25H	THAP9-AS1	-0.13281	0.010035	0.507195	0.003049	3.48892	0.000485	-/+
SEC24AP1	THAP9-AS1	0.021956	0.671712	0.613466	0.000189	3.48872	0.000485	0/+
SOX15	THAP9-AS1	0.039392	0.446914	0.624129	0.000135	3.48785	0.000487	0/+
ITGB8	THAP9-AS1	0.322943	1.5e-10	0.772727	2.19e-07	3.48686	0.000489	#ERROR!
GHR	THAP9-AS1	-0.07796	0.131841	0.546921	0.001199	3.48666	0.000489	0/+
RSPO3	THAP9-AS1	-0.08558	0.097967	0.541472	0.001372	3.48633	0.00049	0/+
NLRX1	THAP9-AS1	0.116581	0.023962	0.668988	2.84e-05	3.48517	0.000492	#ERROR!
ARHGAP1	THAP9-AS1	0.225051	1.08e-05	0.726173	2.54e-06	3.48424	0.000494	#ERROR!
SKAP2	THAP9-AS1	0.28981	1.09e-08	0.757331	5.23e-07	3.48402	0.000494	#ERROR!
RBP1	THAP9-AS1	-0.12999	0.011753	0.508431	0.002967	3.48286	0.000496	-/+
BNC2	THAP9-AS1	-0.03059	0.554836	0.578812	0.000519	3.48254	0.000497	0/+
PKIA	THAP9-AS1	0.034212	0.508942	0.620235	0.000153	3.48197	0.000498	0/+
TSHZ3	THAP9-AS1	-0.06338	0.220758	0.556452	0.000942	3.48189	0.000498	0/+
MEOX2	THAP9-AS1	-0.09129	0.077446	0.536657	0.001543	3.48115	0.000499	0/+
ANKRA2	THAP9-AS1	0.487893	0	0.840909	1.7e-09	3.48105	0.000499	#ERROR!
SH3TC2	THAP9-AS1	0.191655	0.000189	0.708926	5.59e-06	3.48099	0.0005	#ERROR!
IPO13	THAP9-AS1	0.177031	0.000573	0.701246	7.8e-06	3.48031	0.000501	#ERROR!
INPP5K	THAP9-AS1	0.21271	3.28e-05	0.719575	3.46e-06	3.47992	0.000502	#ERROR!
RUSC2	THAP9-AS1	0.104704	0.042726	0.661657	3.73e-05	3.47947	0.000502	#ERROR!
GIMAP5	THAP9-AS1	0.011073	0.830765	0.605316	0.000242	3.47824	0.000505	0/+
TCHP	THAP9-AS1	0.37145	1.03e-13	0.793255	6.15e-08	3.47635	0.000508	#ERROR!
BLMH	THAP9-AS1	0.345366	6.05e-12	0.781891	1.26e-07	3.47635	0.000508	#ERROR!
HOMEZ	THAP9-AS1	0.25798	4.08e-07	0.741569	1.2e-06	3.47618	0.000509	#ERROR!
BCHE	THAP9-AS1	-0.11229	0.02969	0.520528	0.002257	3.47528	0.00051	-/+
P2RY1	THAP9-AS1	0.060227	0.244642	0.635139	9.42e-05	3.47452	0.000512	0/+
DISC1	THAP9-AS1	0.179547	0.000476	0.701979	7.56e-06	3.47449	0.000512	#ERROR!
IGSF10	THAP9-AS1	-0.02005	0.698763	0.584731	0.00044	3.47447	0.000512	0/+
PLPPR4	THAP9-AS1	0.028761	0.578748	0.615878	0.000175	3.47394	0.000513	0/+
CLDN5	THAP9-AS1	-0.17307	0.000763	0.473607	0.006182	3.47382	0.000513	-/+
LRRC37A6P	THAP9-AS1	0.100928	0.050829	0.658841	4.13e-05	3.47355	0.000514	0/+
SOX18	THAP9-AS1	-0.13788	0.007499	0.500962	0.003495	3.47284	0.000515	-/+
MMRN2	THAP9-AS1	-0.08237	0.111291	0.541789	0.001362	3.47228	0.000516	0/+
TBCB	THAP9-AS1	0.077153	0.135883	0.644795	6.79e-05	3.47124	0.000518	0/+
S1PR3	THAP9-AS1	-0.07583	0.142719	0.546188	0.001221	3.47064	0.000519	0/+
COG8	THAP9-AS1	0.228365	7.94e-06	0.72654	2.5e-06	3.47055	0.000519	#ERROR!
LINC01144	THAP9-AS1	0.187351	0.000264	0.705505	6.49e-06	3.469	0.000522	#ERROR!
DOC2A	THAP9-AS1	0.088502	0.086994	0.651069	5.46e-05	3.46815	0.000524	0/+
AMOTL1	THAP9-AS1	0.01198	0.817133	0.604472	0.000248	3.46697	0.000526	0/+
OTUD7A	THAP9-AS1	0.047976	0.354198	0.626833	0.000124	3.4669	0.000527	0/+
DUSP22	THAP9-AS1	0.210134	4.1e-05	0.717009	3.89e-06	3.46679	0.000527	#ERROR!
MRI1	THAP9-AS1	0.259569	3.44e-07	0.741454	1.2e-06	3.46631	0.000528	#ERROR!
NOTCH3	THAP9-AS1	0.075802	0.14289	0.643328	7.14e-05	3.46546	0.000529	0/+
ADCY3	THAP9-AS1	0.167098	0.001163	0.694282	1.05e-05	3.4635	0.000533	#ERROR!
FAM21EP	THAP9-AS1	0.223035	1.3e-05	0.723186	2.93e-06	3.46325	0.000534	#ERROR!
TLE4	THAP9-AS1	0.17897	0.000497	0.700513	8.05e-06	3.46296	0.000534	#ERROR!
PRKAB1	THAP9-AS1	0.281193	3.04e-08	0.751466	7.17e-07	3.46271	0.000535	#ERROR!
LINC02449	THAP9-AS1	0.159425	0.001956	0.690072	1.24e-05	3.4625	0.000535	#ERROR!
OGN	THAP9-AS1	-0.12574	0.014827	0.508431	0.002967	3.46113	0.000538	-/+
RELL2	THAP9-AS1	0.124032	0.016255	0.670521	2.68e-05	3.46108	0.000538	#ERROR!
CCN5	THAP9-AS1	-0.10643	0.039393	0.522727	0.002145	3.46062	0.000539	-/+
ANKRD2	THAP9-AS1	-0.0428	0.408579	0.567622	0.000703	3.46016	0.00054	0/+
DNAJC9	THAP9-AS1	0.355067	1.39e-12	0.784824	1.05e-07	3.45889	0.000542	#ERROR!
ST3GAL4	THAP9-AS1	0.016498	0.750146	0.606305	0.000235	3.45878	0.000543	0/+
TMPRSS11D	THAP9-AS1	0.074291	0.151054	0.641574	7.58e-05	3.45807	0.000544	0/+
DHX34	THAP9-AS1	0.339532	1.43e-11	0.777859	1.62e-07	3.4578	0.000545	#ERROR!
NGFR	THAP9-AS1	-0.17632	0.000604	0.468475	0.006845	3.45748	0.000545	-/+
ADGRL4	THAP9-AS1	0.105348	0.041458	0.659457	4.04e-05	3.45653	0.000547	#ERROR!
SFRP2	THAP9-AS1	-0.0693	0.18056	0.548754	0.001145	3.45598	0.000548	0/+
ARSF	THAP9-AS1	-0.04875	0.346524	0.562812	0.000799	3.45457	0.000551	0/+
SMG1P3	THAP9-AS1	0.212585	3.32e-05	0.717009	3.89e-06	3.45387	0.000553	#ERROR!
ACTRT3	THAP9-AS1	0.073971	0.152825	0.64088	7.76e-05	3.45374	0.000553	0/+
SNORA73B	THAP9-AS1	0.141286	0.006132	-0.49537	0.003942	-3.45288	0.000555	#ERROR!
ENDOD1	THAP9-AS1	0.305109	1.61e-09	0.7618	4.09e-07	3.45268	0.000555	#ERROR!
LURAP1	THAP9-AS1	-0.00141	0.978329	0.593876	0.000339	3.45113	0.000558	0/+
MAN1B1-DT	THAP9-AS1	0.074125	0.151972	0.640631	7.83e-05	3.45084	0.000559	0/+
TMC1	THAP9-AS1	0.142339	0.005758	0.679553	1.89e-05	3.45078	0.000559	#ERROR!
CHIC1	THAP9-AS1	0.053657	0.30004	0.628299	0.000118	3.45038	0.00056	0/+
HIVEP3	THAP9-AS1	0.078193	0.130671	0.642962	7.23e-05	3.45019	0.00056	0/+
MFAP3	THAP9-AS1	0.276294	5.36e-08	0.748052	8.58e-07	3.45019	0.00056	#ERROR!
FALEC	THAP9-AS1	0.037592	0.46797	0.618382	0.000162	3.44978	0.000561	0/+
KCTD1	THAP9-AS1	0.26797	1.38e-07	0.74402	1.06e-06	3.44966	0.000561	#ERROR!
KIAA0825	THAP9-AS1	0.259184	3.59e-07	0.739736	1.31e-06	3.44923	0.000562	#ERROR!
RAB38	THAP9-AS1	0.193928	0.000158	0.706886	6.11e-06	3.44849	0.000564	#ERROR!
GAB1	THAP9-AS1	0.247435	1.23e-06	0.733871	1.76e-06	3.44784	0.000565	#ERROR!
RUBCN	THAP9-AS1	0.317795	3.02e-10	0.767229	3.01e-07	3.44772	0.000565	#ERROR!
SMIM10	THAP9-AS1	-0.03678	0.477592	0.570015	0.00066	3.44763	0.000566	0/+
SLC1A3	THAP9-AS1	0.112236	0.029775	0.662328	3.64e-05	3.44709	0.000567	#ERROR!
ATF7IP	THAP9-AS1	0.363826	3.52e-13	0.787757	8.76e-08	3.44691	0.000567	#ERROR!
OSMR	THAP9-AS1	0.195422	0.00014	0.707478	5.96e-06	3.44664	0.000568	#ERROR!
CTF2P	THAP9-AS1	-0.05543	0.284311	0.557095	0.000927	3.44639	0.000568	0/+
CUZD1	THAP9-AS1	0.340514	1.24e-11	0.77737	1.66e-07	3.44598	0.000569	#ERROR!
AKR7L	THAP9-AS1	0.450956	0	-0.1954	0.283837	-3.4451	0.000571	#ERROR!
FAM171A2	THAP9-AS1	-0.04007	0.439151	0.567449	0.000707	3.44509	0.000571	0/+
OSBPL8	THAP9-AS1	0.369269	1.47e-13	0.789956	7.61e-08	3.44457	0.000572	#ERROR!
RNU6-39P	THAP9-AS1	0.087471	0.090749	0.647636	6.15e-05	3.44348	0.000574	0/+
RECQL	THAP9-AS1	0.267901	1.39e-07	0.743402	1.09e-06	3.44307	0.000575	#ERROR!
NAB2	THAP9-AS1	0.0588	0.256023	0.630499	0.00011	3.44274	0.000576	0/+
PPP2R3B	THAP9-AS1	0.291943	8.38e-09	0.754765	6.01e-07	3.44211	0.000577	#ERROR!
STX6	THAP9-AS1	0.432246	0	0.816349	1.23e-08	3.44144	0.000579	#ERROR!
ANTXR1	THAP9-AS1	0.050038	0.333864	0.625	0.000131	3.4413	0.000579	0/+
HEG1	THAP9-AS1	-0.02127	0.681393	0.579545	0.000509	3.44111	0.000579	0/+
RGS20	THAP9-AS1	0.110846	0.031874	0.66078	3.85e-05	3.44032	0.000581	#ERROR!
PRKAA2	THAP9-AS1	-0.08216	0.112194	0.537256	0.001521	3.43902	0.000584	0/+
CDO1	THAP9-AS1	-0.13638	0.008182	0.496974	0.003809	3.43839	0.000585	-/+
ACP7	THAP9-AS1	-0.04856	0.348315	0.560733	0.000843	3.43836	0.000585	0/+
MSL2	THAP9-AS1	0.413284	0	0.808284	2.21e-08	3.43831	0.000585	#ERROR!
NKD1	THAP9-AS1	-0.04192	0.418319	0.565249	0.000749	3.4381	0.000586	0/+
MASTL	THAP9-AS1	0.551635	0	0.862537	2.21e-10	3.43804	0.000586	#ERROR!
ADCYAP1	THAP9-AS1	-0.11165	0.030642	0.515443	0.002535	3.437	0.000588	-/+
HIVEP1	THAP9-AS1	0.390962	3.77e-15	0.798754	4.27e-08	3.43695	0.000588	#ERROR!
KCNT2	THAP9-AS1	0.019588	0.70537	0.605444	0.000241	3.43635	0.00059	0/+
LOC101927989	THAP9-AS1	0.12725	0.013663	0.6696	2.78e-05	3.43619	0.00059	#ERROR!
GPR63	THAP9-AS1	0.231733	5.78e-06	0.724956	2.7e-06	3.43578	0.000591	#ERROR!
KIRREL1	THAP9-AS1	0.022375	0.665822	0.607038	0.00023	3.43501	0.000593	0/+
BNC1	THAP9-AS1	0.03179	0.539401	0.612942	0.000192	3.43491	0.000593	0/+
SLC7A11	THAP9-AS1	0.469941	0	-0.17009	0.352015	-3.43456	0.000594	#ERROR!
TACC1	THAP9-AS1	0.02596	0.616292	0.609238	0.000215	3.43452	0.000594	0/+
KCNIP3	THAP9-AS1	-0.0845	0.102307	0.534873	0.001611	3.43404	0.000595	0/+
MIR186	THAP9-AS1	0.378114	3.42e-14	0.793006	6.25e-08	3.43391	0.000595	#ERROR!
MAGI2-AS3	THAP9-AS1	0.04077	0.431165	0.618402	0.000162	3.4339	0.000595	0/+
MED23	THAP9-AS1	0.610524	0	0.883431	2.15e-11	3.43293	0.000597	#ERROR!
FGF14	THAP9-AS1	-0.03025	0.559284	0.572319	0.00062	3.43189	0.000599	0/+
CYP2U1	THAP9-AS1	0.081804	0.113765	0.642962	7.23e-05	3.43188	0.000599	0/+
KATNAL2	THAP9-AS1	0.284322	2.1e-08	0.750275	7.64e-07	3.43181	0.0006	#ERROR!
RAB17	THAP9-AS1	0.392481	2.89e-15	-0.26026	0.150256	-3.43139	0.000601	#ERROR!
SRSF12	THAP9-AS1	0.045916	0.375258	0.621265	0.000148	3.43135	0.000601	0/+
ADM5	THAP9-AS1	0.094338	0.068029	0.650229	5.62e-05	3.43116	0.000601	0/+
HNF4G	THAP9-AS1	0.394576	2e-15	-0.2579	0.154121	-3.43113	0.000601	#ERROR!
CALCRL	THAP9-AS1	0.088183	0.088141	0.646628	6.37e-05	3.43112	0.000601	0/+
IFT74	THAP9-AS1	0.338946	1.56e-11	0.775364	1.88e-07	3.42946	0.000605	#ERROR!
DBNL	THAP9-AS1	0.150676	0.003447	0.681818	1.73e-05	3.42912	0.000606	#ERROR!
BEAN1	THAP9-AS1	0.058382	0.259428	0.62822	0.000118	3.42585	0.000613	0/+
TNFAIP1	THAP9-AS1	0.315499	4.12e-10	0.764296	3.56e-07	3.42486	0.000615	#ERROR!
ITIH2	THAP9-AS1	0.07922	0.125678	0.640575	7.84e-05	3.42455	0.000616	0/+
FAM220A	THAP9-AS1	0.29212	8.2e-09	0.753299	6.51e-07	3.42401	0.000617	#ERROR!
ANAPC5	THAP9-AS1	0.457615	0	0.825513	6.08e-09	3.42369	0.000618	#ERROR!
RAB31	THAP9-AS1	0.041473	0.423253	0.617359	0.000167	3.42185	0.000622	0/+
OGFRL1	THAP9-AS1	0.113018	0.028648	0.659824	3.99e-05	3.4207	0.000625	#ERROR!
FGF2	THAP9-AS1	-0.03302	0.523833	0.568915	0.00068	3.42044	0.000625	0/+
DSEL	THAP9-AS1	0.001011	0.984426	0.591438	0.000364	3.42001	0.000626	0/+
MPHOSPH9	THAP9-AS1	0.513457	0	0.847218	9.67e-10	3.41969	0.000627	#ERROR!
RNA5SP202	THAP9-AS1	-0.11942	0.02072	-0.66324	3.52e-05	-3.41865	0.000629	-/-
PPP1R2B	THAP9-AS1	0.001342	0.979341	0.591314	0.000365	3.41739	0.000632	0/+
DAAM2	THAP9-AS1	-0.08145	0.115359	0.53469	0.001618	3.41726	0.000633	0/+
RNU6-1310P	THAP9-AS1	0.027025	0.601889	0.607694	0.000225	3.4168	0.000634	0/+
MRGPRX2	THAP9-AS1	-0.03501	0.499053	0.567052	0.000714	3.41664	0.000634	0/+
DIRAS1	THAP9-AS1	-0.11125	0.031252	0.512694	0.002697	3.41611	0.000635	-/+
ASCC3	THAP9-AS1	0.533758	0	0.854734	4.78e-10	3.41606	0.000635	#ERROR!
ADGRF3	THAP9-AS1	0.205314	6.19e-05	0.709583	5.43e-06	3.41601	0.000635	#ERROR!
TRAFD1	THAP9-AS1	0.224804	1.11e-05	0.719575	3.46e-06	3.41593	0.000636	#ERROR!
NCOA1	THAP9-AS1	0.279018	3.92e-08	0.746334	9.39e-07	3.41572	0.000636	#ERROR!
EXOC7	THAP9-AS1	0.235786	3.91e-06	0.725073	2.68e-06	3.41542	0.000637	#ERROR!
TMEM91	THAP9-AS1	0.135483	0.008615	0.671801	2.55e-05	3.41413	0.00064	#ERROR!
AGTR1	THAP9-AS1	-0.12779	0.013264	0.499863	0.003579	3.41374	0.000641	-/+
EDRF1-DT	THAP9-AS1	0.129561	0.012034	0.668319	2.91e-05	3.41267	0.000643	#ERROR!
MBD2	THAP9-AS1	0.398479	8.88e-16	0.80022	3.87e-08	3.41256	0.000644	#ERROR!
MAP7D3	THAP9-AS1	0.072718	0.159923	0.635264	9.38e-05	3.41237	0.000644	0/+
TMEM35A	THAP9-AS1	-0.13306	0.00989	0.495601	0.003922	3.41222	0.000644	-/+
EFHD1	THAP9-AS1	-0.11564	0.025134	0.508798	0.002942	3.41195	0.000645	-/+
CDKN1B	THAP9-AS1	0.248346	1.12e-06	0.730938	2.03e-06	3.41108	0.000647	#ERROR!
DLGAP1	THAP9-AS1	0.047455	0.359448	0.619729	0.000155	3.411	0.000647	0/+
ROR1	THAP9-AS1	-0.05301	0.305914	0.553886	0.001006	3.41077	0.000648	0/+
C3	THAP9-AS1	-0.08124	0.116306	0.533724	0.001656	3.40939	0.000651	0/+
KANK1	THAP9-AS1	0.176283	0.000605	0.693548	1.08e-05	3.4087	0.000653	#ERROR!
ABI3BP	THAP9-AS1	-0.06711	0.194712	0.543672	0.0013	3.40844	0.000653	0/+
MAX	THAP9-AS1	0.237405	3.34e-06	0.72514	2.67e-06	3.40749	0.000656	#ERROR!
CCDC69	THAP9-AS1	-0.13821	0.007352	0.490836	0.00434	3.40693	0.000657	-/+
HNF1A-AS1	THAP9-AS1	0.317465	3.16e-10	-0.33397	0.061745	-3.4062	0.000659	#ERROR!
IDE	THAP9-AS1	0.448646	0	0.820748	8.81e-09	3.40609	0.000659	#ERROR!
LINC00670	THAP9-AS1	-0.03676	0.477866	0.564315	0.000768	3.40518	0.000661	0/+
PDE2A	THAP9-AS1	-0.09304	0.071929	0.52456	0.002056	3.40518	0.000661	0/+
LOC100421122	THAP9-AS1	0.090504	0.08006	0.644929	6.76e-05	3.40466	0.000662	0/+
LHFPL6	THAP9-AS1	-0.07616	0.140997	0.536657	0.001543	3.40437	0.000663	0/+
JHY	THAP9-AS1	0.051316	0.321653	0.621265	0.000148	3.40408	0.000664	0/+
STAR	THAP9-AS1	0.127632	0.013381	0.666178	3.16e-05	3.40311	0.000666	#ERROR!
KRT18P10	THAP9-AS1	0.30567	1.5e-09	-0.34495	0.05317	-3.4029	0.000667	#ERROR!
MUC15	THAP9-AS1	-0.03296	0.524572	0.566538	0.000724	3.40247	0.000668	0/+
PRRT3	THAP9-AS1	0.141254	0.006144	0.673754	2.37e-05	3.40247	0.000668	#ERROR!
HOXB2	THAP9-AS1	0.075916	0.142288	0.635997	9.15e-05	3.40237	0.000668	0/+
PHLDB3	THAP9-AS1	0.10457	0.042992	0.652859	5.12e-05	3.40212	0.000669	#ERROR!
BMS1P10	THAP9-AS1	0.152753	0.003021	0.680008	1.86e-05	3.40141	0.00067	#ERROR!
MAP2K4P1	THAP9-AS1	0.095251	0.065394	0.647296	6.23e-05	3.401	0.000671	0/+
KIFAP3	THAP9-AS1	0.310426	8.06e-10	0.759897	4.55e-07	3.40033	0.000673	#ERROR!
TFAP2E	THAP9-AS1	0.222432	1.38e-05	0.716722	3.94e-06	3.39882	0.000677	#ERROR!
GART	THAP9-AS1	0.443556	0	0.818182	1.07e-08	3.39875	0.000677	#ERROR!
GJD3	THAP9-AS1	-0.01157	0.823243	0.580255	0.000499	3.39763	0.00068	0/+
TGFB3	THAP9-AS1	-0.00538	0.917349	0.584311	0.000446	3.39733	0.00068	0/+
SLC39A10	THAP9-AS1	0.50518	0	0.842742	1.44e-09	3.39715	0.000681	#ERROR!
LIMCH1	THAP9-AS1	0.171734	0.00084	0.689883	1.25e-05	3.39691	0.000682	#ERROR!
TSPAN9	THAP9-AS1	-0.0396	0.444568	0.561217	0.000833	3.39664	0.000682	0/+
FAM110D	THAP9-AS1	-0.21397	2.94e-05	0.427459	0.014676	3.39608	0.000684	-/+
NNMT	THAP9-AS1	-0.01213	0.814859	0.579545	0.000509	3.39506	0.000686	0/+
FOXP2	THAP9-AS1	-0.03314	0.522249	0.565249	0.000749	3.39385	0.000689	0/+
CREG1	THAP9-AS1	0.251123	8.4e-07	0.730572	2.06e-06	3.39219	0.000693	#ERROR!
TBCCD1	THAP9-AS1	0.428707	0	0.811584	1.74e-08	3.39218	0.000693	#ERROR!
RIC3	THAP9-AS1	-0.06649	0.198903	0.541789	0.001362	3.39184	0.000694	0/+
LOC105369921	THAP9-AS1	-0.01873	0.717689	0.574704	0.000581	3.39175	0.000694	0/+
PTPRD-AS1	THAP9-AS1	-0.12634	0.014356	0.497662	0.003753	3.39155	0.000695	-/+
DTD2	THAP9-AS1	0.422702	0	0.809018	2.1e-08	3.39149	0.000695	#ERROR!
MEX3C	THAP9-AS1	0.441185	0	0.816716	1.19e-08	3.39134	0.000696	#ERROR!
CNKSR3	THAP9-AS1	0.232526	5.36e-06	0.721041	3.24e-06	3.39023	0.000698	#ERROR!
PPOX	THAP9-AS1	0.378754	3.09e-14	0.790028	7.58e-08	3.38999	0.000699	#ERROR!
CGB7	THAP9-AS1	0.130633	0.011338	0.666407	3.13e-05	3.38981	0.000699	#ERROR!
C8orf88	THAP9-AS1	-0.08801	0.088753	0.52594	0.001991	3.38926	0.000701	0/+
ADRB2	THAP9-AS1	-0.15252	0.003065	0.47695	0.00578	3.38923	0.000701	-/+
LACC1	THAP9-AS1	0.380391	2.35e-14	0.790689	7.26e-08	3.38922	0.000701	#ERROR!
ISM1	THAP9-AS1	-0.08642	0.094718	0.527088	0.001938	3.38916	0.000701	0/+
TRIM24	THAP9-AS1	0.243023	1.92e-06	0.726173	2.54e-06	3.38845	0.000703	#ERROR!
FAM184A	THAP9-AS1	0.112795	0.028966	0.656035	4.57e-05	3.38818	0.000704	#ERROR!
ANKRD18B	THAP9-AS1	0.058431	0.259023	0.623682	0.000137	3.38801	0.000704	0/+
PCDHGA9	THAP9-AS1	0.025604	0.621131	0.603116	0.000259	3.38756	0.000705	0/+
FHL3	THAP9-AS1	-0.00671	0.896946	0.582111	0.000474	3.38726	0.000706	0/+
TBX18-AS1	THAP9-AS1	0.082002	0.112893	0.637838	8.6e-05	3.38712	0.000706	0/+
SLC35E3	THAP9-AS1	0.323202	1.45e-10	0.764663	3.49e-07	3.38609	0.000709	#ERROR!
GFOD2	THAP9-AS1	0.229966	6.83e-06	0.719208	3.52e-06	3.38468	0.000713	#ERROR!
RBMS3	THAP9-AS1	0.045857	0.375879	0.615469	0.000177	3.38437	0.000713	0/+
FAM193B	THAP9-AS1	0.509354	0	0.84363	1.34e-09	3.3843	0.000714	#ERROR!
A2ML1	THAP9-AS1	0.084124	0.103843	0.638767	8.34e-05	3.38425	0.000714	0/+
MPDZ	THAP9-AS1	0.041186	0.426472	0.612537	0.000194	3.38424	0.000714	0/+
MOB1A	THAP9-AS1	0.534748	0	0.853372	5.45e-10	3.38373	0.000715	#ERROR!
HIVEP2	THAP9-AS1	0.296426	4.82e-09	0.751833	7.04e-07	3.38322	0.000716	#ERROR!
LINC01197	THAP9-AS1	-0.08508	0.099949	0.527039	0.00194	3.38204	0.000719	0/+
TEPP	THAP9-AS1	-0.04153	0.422602	0.557877	0.000908	3.38192	0.00072	0/+
PHLDA3	THAP9-AS1	-0.037	0.474957	0.56085	0.000841	3.38087	0.000723	0/+
PARG	THAP9-AS1	0.467989	0	0.826948	5.43e-09	3.37996	0.000725	#ERROR!
PDLIM3	THAP9-AS1	-0.11309	0.02855	0.505865	0.00314	3.37904	0.000727	-/+
TBX2-AS1	THAP9-AS1	0.0028	0.956905	0.587222	0.000411	3.37846	0.000729	0/+
NUP153-AS1	THAP9-AS1	0.095802	0.063843	0.644907	6.76e-05	3.37754	0.000731	0/+
GLTP	THAP9-AS1	0.25244	7.32e-07	0.729839	2.14e-06	3.3772	0.000732	#ERROR!
MANSC1	THAP9-AS1	0.278528	4.14e-08	0.742669	1.13e-06	3.37696	0.000733	#ERROR!
ANO2	THAP9-AS1	0.000126	0.998056	0.585259	0.000434	3.37686	0.000733	0/+
CLEC7A	THAP9-AS1	0.081904	0.113322	0.63648	9e-05	3.3761	0.000735	0/+
LOC100130691	THAP9-AS1	0.327702	7.76e-11	0.765833	3.26e-07	3.37495	0.000738	#ERROR!
GPR37	THAP9-AS1	0.123909	0.016362	0.660921	3.83e-05	3.37485	0.000739	#ERROR!
TMEM45A	THAP9-AS1	0.109963	0.033272	0.652859	5.12e-05	3.37464	0.000739	#ERROR!
HOXA3	THAP9-AS1	0.057668	0.265304	0.621575	0.000146	3.37453	0.000739	0/+
RHD	THAP9-AS1	0.227069	8.97e-06	0.716684	3.95e-06	3.37383	0.000741	#ERROR!
PDZD4	THAP9-AS1	-0.15183	0.003204	0.475073	0.006002	3.37342	0.000742	-/+
CMTR2	THAP9-AS1	0.492886	0	0.83651	2.48e-09	3.3732	0.000743	#ERROR!
SUSD4	THAP9-AS1	-0.03639	0.482266	0.560169	0.000856	3.37279	0.000744	0/+
COPS6	THAP9-AS1	0.064799	0.210584	0.625733	0.000128	3.37275	0.000744	0/+
PLA2G5	THAP9-AS1	-0.10944	0.034128	0.507608	0.003021	3.37224	0.000746	-/+
TMCC2	THAP9-AS1	-0.11948	0.020656	0.5	0.003569	3.37211	0.000746	-/+
PHC1	THAP9-AS1	0.163355	0.001503	0.682614	1.68e-05	3.37113	0.000749	#ERROR!
P2RY12	THAP9-AS1	-0.09392	0.069253	0.518973	0.002339	3.371	0.000749	0/+
TRIM4	THAP9-AS1	0.324126	1.28e-10	0.763816	3.66e-07	3.37064	0.00075	#ERROR!
SEMA4G	THAP9-AS1	0.392888	2.66e-15	-0.24853	0.170183	-3.37063	0.00075	#ERROR!
SEMA6B	THAP9-AS1	-0.11237	0.029583	0.505132	0.003191	3.37041	0.000751	-/+
FAM234B	THAP9-AS1	0.160364	0.001838	0.680718	1.81e-05	3.36877	0.000755	#ERROR!
IFFO2	THAP9-AS1	0.099231	0.054867	0.645894	6.54e-05	3.36863	0.000755	0/+
GLS2	THAP9-AS1	0.248994	1.05e-06	0.727306	2.41e-06	3.36853	0.000756	#ERROR!
SCN3B	THAP9-AS1	0.039307	0.447892	0.609238	0.000215	3.3672	0.000759	0/+
FNBP1	THAP9-AS1	0.002334	0.964065	0.585411	0.000432	3.3669	0.00076	0/+
SLC25A21	THAP9-AS1	0.220338	1.67e-05	0.712517	4.77e-06	3.36663	0.000761	#ERROR!
GRK3	THAP9-AS1	0.094851	0.066537	0.642962	7.23e-05	3.36564	0.000764	0/+
PSMG1	THAP9-AS1	0.376103	4.8e-14	0.787023	9.18e-08	3.36553	0.000764	#ERROR!
EEA1	THAP9-AS1	0.400406	6.66e-16	0.797654	4.6e-08	3.36527	0.000765	#ERROR!
PPP1R9B	THAP9-AS1	0.15512	0.002594	0.677419	2.06e-05	3.36502	0.000765	#ERROR!
PHYHD1	THAP9-AS1	-0.12385	0.016414	0.495463	0.003934	3.3641	0.000768	-/+
CNTLN	THAP9-AS1	0.129951	0.011776	0.663123	3.53e-05	3.36366	0.000769	#ERROR!
HAPLN3	THAP9-AS1	0.05	0.334233	0.615469	0.000177	3.36345	0.00077	0/+
IL6ST	THAP9-AS1	0.20506	6.33e-05	0.704179	6.88e-06	3.36293	0.000771	#ERROR!
FAXDC2	THAP9-AS1	-0.07799	0.131669	0.529326	0.001838	3.36205	0.000774	0/+
HCG11	THAP9-AS1	0.192777	0.000173	0.697581	9.11e-06	3.36203	0.000774	#ERROR!
CGNL1	THAP9-AS1	-0.10044	0.051969	0.51283	0.002689	3.36196	0.000774	0/+
ATXN2-AS	THAP9-AS1	0.203199	7.39e-05	0.703053	7.22e-06	3.36148	0.000775	#ERROR!
RGS10	THAP9-AS1	0.064659	0.211574	0.624267	0.000134	3.36134	0.000776	0/+
MCMDC2	THAP9-AS1	0.200636	9.15e-05	0.701677	7.66e-06	3.36126	0.000776	#ERROR!
SH3GL3	THAP9-AS1	0.01325	0.798152	0.59177	0.000361	3.36092	0.000777	0/+
ADGRF5P1	THAP9-AS1	0.083113	0.108078	0.635153	9.41e-05	3.35874	0.000783	0/+
LINC00484	THAP9-AS1	0.067348	0.193153	0.625417	0.000129	3.35724	0.000787	0/+
SPRTN	THAP9-AS1	0.413693	0	0.802786	3.24e-08	3.35693	0.000788	#ERROR!
GNG4	THAP9-AS1	-0.07224	0.162671	0.532539	0.001703	3.35547	0.000792	0/+
SUN3	THAP9-AS1	0.013236	0.79836	0.591053	0.000368	3.35544	0.000792	0/+
LOC100132249	THAP9-AS1	0.125803	0.01478	0.659817	3.99e-05	3.35529	0.000793	#ERROR!
MYCT1	THAP9-AS1	-0.01955	0.705864	0.569282	0.000673	3.35528	0.000793	0/+
ERI1	THAP9-AS1	0.49577	0	0.836587	2.46e-09	3.35526	0.000793	#ERROR!
NOG	THAP9-AS1	-0.1277	0.01333	0.491094	0.004316	3.35473	0.000794	-/+
LMOD3	THAP9-AS1	0.004578	0.929593	0.585201	0.000435	3.35399	0.000797	0/+
LIMS1-AS1	THAP9-AS1	0.454026	0	0.819527	9.67e-09	3.35327	0.000799	#ERROR!
KCNB1	THAP9-AS1	-0.15434	0.002728	0.469941	0.00665	3.3531	0.000799	-/+
TRIM35	THAP9-AS1	0.268839	1.25e-07	0.735704	1.61e-06	3.35237	0.000801	#ERROR!
SYNPO2	THAP9-AS1	-0.08956	0.083267	0.519428	0.002315	3.35197	0.000802	0/+
KLHL9	THAP9-AS1	0.41285	0	0.802053	3.41e-08	3.35168	0.000803	#ERROR!
EHD2	THAP9-AS1	-0.00512	0.921294	0.578446	0.000525	3.3514	0.000804	0/+
TMEM109	THAP9-AS1	0.043619	0.399638	0.609971	0.00021	3.35132	0.000804	0/+
CELF2	THAP9-AS1	0.004936	0.924109	0.585044	0.000437	3.35099	0.000805	0/+
HIF3A	THAP9-AS1	-0.03368	0.515552	0.559018	0.000882	3.35065	0.000806	0/+
PRIMA1	THAP9-AS1	-0.18668	0.000278	0.443039	0.011102	3.34969	0.000809	-/+
DAPL1	THAP9-AS1	-0.04779	0.356068	0.548955	0.00114	3.34871	0.000812	0/+
ELOVL5	THAP9-AS1	0.143299	0.005435	0.668988	2.84e-05	3.34824	0.000813	#ERROR!
BDKRB1	THAP9-AS1	-0.02127	0.681464	0.567134	0.000713	3.34794	0.000814	0/+
PDZRN4	THAP9-AS1	-0.14062	0.006381	0.479883	0.005445	3.34709	0.000817	-/+
ST6GALNAC6	THAP9-AS1	-0.07792	0.132012	0.527126	0.001936	3.34633	0.000819	0/+
ACER1	THAP9-AS1	0.008309	0.872586	0.586578	0.000418	3.34575	0.000821	0/+
SMARCA2	THAP9-AS1	0.212597	3.31e-05	0.706378	6.25e-06	3.34528	0.000822	#ERROR!
HHEX	THAP9-AS1	-0.01482	0.774909	0.571114	0.000641	3.34509	0.000823	0/+
MCTP1	THAP9-AS1	0.127809	0.013252	0.659824	3.99e-05	3.34508	0.000823	#ERROR!
NAPA	THAP9-AS1	0.084938	0.100528	0.634531	9.61e-05	3.34423	0.000825	0/+
CYP1B1-AS1	THAP9-AS1	-0.06777	0.190393	0.53414	0.001639	3.34408	0.000826	0/+
ELN	THAP9-AS1	-0.11864	0.021563	0.496334	0.003861	3.3433	0.000828	-/+
BCAM	THAP9-AS1	-0.03536	0.49476	0.556818	0.000933	3.34306	0.000829	0/+
SLIT2	THAP9-AS1	-0.09858	0.056484	0.511364	0.002779	3.34249	0.00083	0/+
FGFR1	THAP9-AS1	-0.08115	0.116684	0.524194	0.002073	3.34229	0.000831	0/+
TAL1	THAP9-AS1	0.065413	0.206289	0.622365	0.000143	3.34186	0.000832	0/+
BORCS6	THAP9-AS1	0.046111	0.37324	0.610337	0.000208	3.34168	0.000833	0/+
ANKRD65	THAP9-AS1	-0.13998	0.006626	0.479516	0.005486	3.34142	0.000834	-/+
ABCA9	THAP9-AS1	-0.00698	0.892823	0.57588	0.000563	3.34139	0.000834	0/+
LYST	THAP9-AS1	0.345942	5.55e-12	0.771515	2.35e-07	3.34127	0.000834	#ERROR!
PABPC4L	THAP9-AS1	0.02081	0.687924	0.594134	0.000337	3.3412	0.000834	0/+
LINC02188	THAP9-AS1	-0.09312	0.07167	0.515111	0.002554	3.34038	0.000837	0/+
MEMO1	THAP9-AS1	0.276824	5.05e-08	0.738521	1.4e-06	3.33999	0.000838	#ERROR!
LINC02798	THAP9-AS1	0.015703	0.761825	0.590635	0.000372	3.33977	0.000838	0/+
NOTCH4	THAP9-AS1	0.040772	0.431141	0.606672	0.000232	3.3393	0.00084	0/+
DVL2	THAP9-AS1	0.26388	2.16e-07	0.732038	1.92e-06	3.33924	0.00084	#ERROR!
CP	THAP9-AS1	0.08776	0.089686	0.635505	9.3e-05	3.33814	0.000843	0/+
KRT8P31	THAP9-AS1	0.265353	1.84e-07	-0.37169	0.036201	-3.33629	0.000849	#ERROR!
SNHG26	THAP9-AS1	0.186439	0.000283	0.691476	1.17e-05	3.33573	0.000851	#ERROR!
MAS1L	THAP9-AS1	-0.08554	0.098133	0.519887	0.00229	3.33473	0.000854	0/+
MAPK11	THAP9-AS1	0.014072	0.785929	0.588764	0.000393	3.33354	0.000857	0/+
GABRA3	THAP9-AS1	0.00493	0.924191	0.582616	0.000467	3.33245	0.000861	0/+
MGAT4C	THAP9-AS1	-0.03835	0.459089	0.553231	0.001023	3.33198	0.000862	0/+
ESR1	THAP9-AS1	-0.05738	0.267701	0.539688	0.001433	3.33082	0.000866	0/+
SLC16A1-AS1	THAP9-AS1	0.244453	1.66e-06	0.721423	3.18e-06	3.33053	0.000867	#ERROR!
THADA	THAP9-AS1	0.40369	4.44e-16	0.796554	4.95e-08	3.33034	0.000867	#ERROR!
SAC3D1	THAP9-AS1	0.247314	1.24e-06	0.722706	3e-06	3.32869	0.000873	#ERROR!
NCKAP5L	THAP9-AS1	0.061031	0.238395	0.618035	0.000164	3.32857	0.000873	0/+
LINC02076	THAP9-AS1	0.04378	0.397902	0.607205	0.000229	3.32838	0.000874	0/+
GBE1	THAP9-AS1	0.42504	0	0.805609	2.67e-08	3.32782	0.000875	#ERROR!
LMCD1-AS1	THAP9-AS1	0.205305	6.2e-05	0.700744	7.97e-06	3.32748	0.000876	#ERROR!
FA2H	THAP9-AS1	0.246034	1.42e-06	-0.38787	0.028273	-3.32736	0.000877	#ERROR!
HLX	THAP9-AS1	-0.06344	0.220312	0.534824	0.001613	3.32703	0.000878	0/+
ECM1	THAP9-AS1	0.003859	0.94063	0.581012	0.000489	3.32564	0.000882	0/+
EPHA1-AS1	THAP9-AS1	0.155199	0.002581	0.673028	2.44e-05	3.32395	0.000888	#ERROR!
ADGRB1	THAP9-AS1	0.01326	0.798004	0.586931	0.000414	3.32352	0.000889	0/+
QKI	THAP9-AS1	0.109471	0.034074	0.646628	6.37e-05	3.32281	0.000891	#ERROR!
MGP	THAP9-AS1	-0.14196	0.005892	0.475073	0.006002	3.32258	0.000892	-/+
HDX	THAP9-AS1	0.018416	0.722243	0.590176	0.000377	3.32255	0.000892	0/+
GNE	THAP9-AS1	0.160841	0.00178	0.675953	2.18e-05	3.32183	0.000894	#ERROR!
DLEU2	THAP9-AS1	0.507816	0	0.839355	1.94e-09	3.32097	0.000897	#ERROR!
TNS1	THAP9-AS1	-0.10895	0.034936	0.500367	0.00354	3.32086	0.000897	-/+
LOC401463	THAP9-AS1	-0.08201	0.112839	0.520456	0.002261	3.32077	0.000898	0/+
GPR35	THAP9-AS1	0.31515	4.31e-10	-0.32111	0.073129	-3.32066	0.000898	#ERROR!
JAM2	THAP9-AS1	-0.10402	0.044103	0.504032	0.003269	3.32043	0.000899	-/+
LDB1	THAP9-AS1	0.15132	0.003309	0.670455	2.69e-05	3.32033	0.000899	#ERROR!
ARHGAP19	THAP9-AS1	0.536355	0	0.850518	7.13e-10	3.31993	0.0009	#ERROR!
PABPC5	THAP9-AS1	-0.03266	0.52836	0.555454	0.000966	3.31947	0.000902	0/+
COL18A1	THAP9-AS1	-0.05628	0.276986	0.538856	0.001463	3.31936	0.000902	0/+
EXOC4	THAP9-AS1	0.40898	0	0.798021	4.49e-08	3.3187	0.000904	#ERROR!
SIRPA	THAP9-AS1	0.007648	0.882654	0.582478	0.000469	3.31771	0.000908	0/+
FKBP15	THAP9-AS1	0.404148	4.44e-16	0.795821	5.19e-08	3.3175	0.000908	#ERROR!
EDN1	THAP9-AS1	0.148753	0.003889	0.668622	2.88e-05	3.31683	0.00091	#ERROR!
RGS22	THAP9-AS1	6.73e-05	0.998963	0.577321	0.000541	3.31676	0.000911	0/+
NPR1	THAP9-AS1	-0.13572	0.008499	0.478739	0.005574	3.31445	0.000918	-/+
TCP11L2	THAP9-AS1	0.311063	7.41e-10	0.752818	6.68e-07	3.31343	0.000922	#ERROR!
S100A12	THAP9-AS1	-0.03514	0.497527	0.552837	0.001033	3.31294	0.000923	0/+
TRIM65	THAP9-AS1	0.324006	1.3e-10	0.758867	4.81e-07	3.312	0.000926	#ERROR!
GPR12	THAP9-AS1	-0.02587	0.617524	0.558988	0.000882	3.31105	0.000929	0/+
JPH2	THAP9-AS1	-0.12846	0.012788	0.483871	0.005018	3.31087	0.00093	-/+
LIN7B	THAP9-AS1	0.215646	2.53e-05	0.704545	6.77e-06	3.3108	0.00093	#ERROR!
COL8A2	THAP9-AS1	-0.07967	0.123513	0.520576	0.002255	3.30973	0.000934	0/+
HSPBAP1	THAP9-AS1	0.466198	0	0.82174	8.16e-09	3.30961	0.000934	#ERROR!
CACNA1G	THAP9-AS1	0.031114	0.548073	0.596736	0.000312	3.30956	0.000934	0/+
EPB41L4B	THAP9-AS1	0.374505	6.24e-14	-0.25733	0.155071	-3.30937	0.000935	#ERROR!
CNOT6L	THAP9-AS1	0.495226	0	0.833578	3.17e-09	3.30879	0.000937	#ERROR!
KIAA0408	THAP9-AS1	-0.05775	0.264667	0.53621	0.00156	3.30801	0.00094	0/+
HSD17B6	THAP9-AS1	0.020803	0.688013	0.589809	0.000381	3.30769	0.000941	0/+
TRAPPC10	THAP9-AS1	0.29492	5.81e-09	0.744501	1.03e-06	3.30764	0.000941	#ERROR!
FGF7	THAP9-AS1	-0.02935	0.571017	0.556085	0.000951	3.30737	0.000942	0/+
PXDNL	THAP9-AS1	0.121562	0.018527	0.651875	5.3e-05	3.30678	0.000944	#ERROR!
PMP2	THAP9-AS1	-0.08785	0.089342	0.514076	0.002614	3.30652	0.000945	0/+
FOXC1	THAP9-AS1	0.256839	4.61e-07	0.72544	2.63e-06	3.3064	0.000945	#ERROR!
TBC1D10A	THAP9-AS1	0.196567	0.000127	0.693915	1.06e-05	3.30638	0.000945	#ERROR!
RN7SL471P	THAP9-AS1	-0.22134	1.52e-05	0.406255	0.021043	3.30575	0.000947	-/+
NFYC	THAP9-AS1	0.392994	2.66e-15	0.789956	7.61e-08	3.30472	0.000951	#ERROR!
MAGI2	THAP9-AS1	0.038811	0.453652	0.601045	0.000275	3.30458	0.000951	0/+
IL1RAP	THAP9-AS1	0.285939	1.73e-08	0.739736	1.31e-06	3.30361	0.000954	#ERROR!
NOX5	THAP9-AS1	-0.04296	0.406839	0.545939	0.001229	3.30262	0.000958	0/+
H3-2	THAP9-AS1	-0.08648	0.094476	0.514507	0.002589	3.3025	0.000958	0/+
SP3	THAP9-AS1	0.588692	0	0.869501	1.06e-10	3.30166	0.000961	#ERROR!
AGAP12P	THAP9-AS1	0.256606	4.73e-07	0.724854	2.71e-06	3.30144	0.000962	#ERROR!
TMEM17	THAP9-AS1	0.132521	0.010198	0.657625	4.32e-05	3.30136	0.000962	#ERROR!
SLC13A5	THAP9-AS1	0.031022	0.549259	0.595542	0.000323	3.30069	0.000964	0/+
IL33	THAP9-AS1	-0.0577	0.265013	0.535191	0.001598	3.30059	0.000965	0/+
PGS1	THAP9-AS1	0.407546	2.22e-16	0.796077	5.11e-08	3.30052	0.000965	#ERROR!
CLEC4F	THAP9-AS1	-0.0236	0.648781	0.559075	0.00088	3.30023	0.000966	0/+
EBF1	THAP9-AS1	0.024255	0.639644	0.590909	0.00037	3.2988	0.000971	0/+
ESAM	THAP9-AS1	-0.07182	0.165147	0.52456	0.002056	3.29756	0.000975	0/+
DTD1	THAP9-AS1	0.266697	1.58e-07	0.729539	2.17e-06	3.29696	0.000977	#ERROR!
NDST1	THAP9-AS1	0.034257	0.508377	0.597141	0.000309	3.29688	0.000978	0/+
TMCO6	THAP9-AS1	0.362706	4.21e-13	0.77566	1.84e-07	3.29669	0.000978	#ERROR!
TIMP2	THAP9-AS1	0.005395	0.91707	0.578079	0.00053	3.29565	0.000982	0/+
SNX17	THAP9-AS1	0.087869	0.089284	0.630499	0.00011	3.29549	0.000982	0/+
LYSMD3	THAP9-AS1	0.505417	0	0.836877	2.4e-09	3.29527	0.000983	#ERROR!
D2HGDH	THAP9-AS1	0.383136	1.47e-14	0.784824	1.05e-07	3.29516	0.000984	#ERROR!
ITCH	THAP9-AS1	0.454748	0	0.815982	1.26e-08	3.29478	0.000985	#ERROR!
CWF19L1	THAP9-AS1	0.390583	4e-15	0.788123	8.56e-08	3.2946	0.000986	#ERROR!
ELK4	THAP9-AS1	0.416369	0	0.799487	4.06e-08	3.29424	0.000987	#ERROR!
SPARCL1	THAP9-AS1	-0.02937	0.570743	0.554252	0.000997	3.29413	0.000987	0/+
MYOCD	THAP9-AS1	-0.08758	0.090339	0.512463	0.002711	3.29411	0.000987	0/+
OLMALINC	THAP9-AS1	0.423463	0	0.80253	3.3e-08	3.29363	0.000989	#ERROR!
SORBS1	THAP9-AS1	-0.03812	0.461779	0.548021	0.001167	3.29316	0.000991	0/+
SHANK3	THAP9-AS1	0.116638	0.023892	0.647361	6.21e-05	3.29259	0.000993	#ERROR!
CEP68	THAP9-AS1	0.120391	0.019697	0.64956	5.75e-05	3.29253	0.000993	#ERROR!
DYSF	THAP9-AS1	-0.02481	0.631966	0.557185	0.000924	3.29253	0.000993	0/+
MYH11	THAP9-AS1	-0.12104	0.01904	0.486804	0.004722	3.29224	0.000994	-/+
CAB39L	THAP9-AS1	0.050686	0.327634	0.607038	0.00023	3.29217	0.000994	0/+
TEX2	THAP9-AS1	0.260932	2.97e-07	0.726173	2.54e-06	3.29211	0.000994	#ERROR!
HPS4	THAP9-AS1	0.506809	0	0.837243	2.33e-09	3.29202	0.000995	#ERROR!
SLX4	THAP9-AS1	0.379611	2.66e-14	0.782991	1.18e-07	3.29198	0.000995	#ERROR!
HCN2	THAP9-AS1	0.015342	0.767132	0.584181	0.000447	3.29195	0.000995	0/+
RXYLT1-AS1	THAP9-AS1	-0.04699	0.364219	0.541562	0.001369	3.29166	0.000996	0/+
RN7SL398P	THAP9-AS1	-0.05988	0.247371	0.53226	0.001715	3.29096	0.000998	0/+
LGALS8	THAP9-AS1	0.493453	0	0.831745	3.68e-09	3.29051	0.001	#ERROR!
AR	THAP9-AS1	-0.06382	0.217563	0.529326	0.001838	3.2903	0.001001	0/+
NEGR1	THAP9-AS1	-0.05459	0.291665	0.53579	0.001575	3.28911	0.001005	0/+
THAP8	THAP9-AS1	-0.0594	0.251157	0.532258	0.001715	3.28853	0.001007	0/+
KANSL1	THAP9-AS1	0.46716	0	0.820748	8.81e-09	3.28807	0.001009	#ERROR!
SMAD1	THAP9-AS1	0.394985	1.78e-15	0.789589	7.79e-08	3.28794	0.001009	#ERROR!
PCYOX1L	THAP9-AS1	0.236748	3.56e-06	0.713343	4.59e-06	3.28786	0.00101	#ERROR!
FBF1	THAP9-AS1	0.346078	5.44e-12	0.767229	3.01e-07	3.28758	0.001011	#ERROR!
KLHL3	THAP9-AS1	0.148658	0.003912	0.665323	3.26e-05	3.28738	0.001011	#ERROR!
EMCN	THAP9-AS1	-0.01676	0.746301	0.56195	0.000817	3.2869	0.001013	0/+
PPM1M	THAP9-AS1	0.009603	0.852957	0.579545	0.000509	3.28556	0.001018	0/+
MRTFB	THAP9-AS1	0.290144	1.04e-08	0.74017	1.29e-06	3.28535	0.001019	#ERROR!
LOC101927151	THAP9-AS1	0.238173	3.1e-06	0.713775	4.51e-06	3.28469	0.001021	#ERROR!
MUC13	THAP9-AS1	0.33031	5.38e-11	-0.29933	0.09605	-3.28448	0.001022	#ERROR!
ELFN1	THAP9-AS1	-0.03235	0.532299	0.55082	0.001087	3.28427	0.001022	0/+
SYNM	THAP9-AS1	-0.10317	0.045883	0.499267	0.003626	3.28399	0.001023	-/+
BOK	THAP9-AS1	0.090228	0.080988	0.630499	0.00011	3.28352	0.001025	0/+
ARMC4	THAP9-AS1	-0.05546	0.284055	0.534129	0.00164	3.28177	0.001032	0/+
NUP85	THAP9-AS1	0.507434	0	0.836877	2.4e-09	3.28161	0.001032	#ERROR!
L3HYPDH	THAP9-AS1	0.471741	0	0.822149	7.91e-09	3.28017	0.001037	#ERROR!
PPIL2	THAP9-AS1	0.394816	1.78e-15	0.788856	8.17e-08	3.27915	0.001041	#ERROR!
LOC101927392	THAP9-AS1	-0.10527	0.041618	0.496862	0.003818	3.27857	0.001043	-/+
ARHGAP31	THAP9-AS1	-0.03382	0.513777	0.548987	0.001139	3.27846	0.001044	0/+
TRAPPC8	THAP9-AS1	0.496214	0	0.832111	3.58e-09	3.27809	0.001045	#ERROR!
CRLF1	THAP9-AS1	-0.04446	0.390582	0.541422	0.001374	3.27792	0.001046	0/+
PRRT4	THAP9-AS1	-0.11236	0.0296	0.491337	0.004294	3.2779	0.001046	-/+
METTL24	THAP9-AS1	-0.16376	0.001462	0.450554	0.009659	3.27783	0.001046	-/+
PRKACA	THAP9-AS1	0.041489	0.423082	0.59934	0.000289	3.27765	0.001047	0/+
MTMR3	THAP9-AS1	0.332269	4.07e-11	0.759897	4.55e-07	3.2776	0.001047	#ERROR!
CDH24	THAP9-AS1	0.297391	4.28e-09	0.743035	1.11e-06	3.27746	0.001047	#ERROR!
LINC01638	THAP9-AS1	-0.14014	0.006563	0.469542	0.006702	3.2774	0.001048	-/+
PTPRH	THAP9-AS1	0.30776	1.14e-09	-0.32075	0.073476	-3.27737	0.001048	#ERROR!
CPVL	THAP9-AS1	-0.09944	0.054352	0.5011	0.003484	3.27735	0.001048	0/+
SBF1	THAP9-AS1	0.272618	8.16e-08	0.730572	2.06e-06	3.27593	0.001053	#ERROR!
DCP2	THAP9-AS1	0.552026	0	0.854184	5.04e-10	3.27529	0.001056	#ERROR!
LINC00863	THAP9-AS1	0.066782	0.19693	0.615032	0.00018	3.27508	0.001056	0/+
PRMT2	THAP9-AS1	0.170642	0.000907	0.67632	2.15e-05	3.27446	0.001059	#ERROR!
TMEM221	THAP9-AS1	-0.00555	0.914622	0.56789	0.000698	3.27439	0.001059	0/+
RBM14	THAP9-AS1	0.329007	6.46e-11	0.758065	5.03e-07	3.27427	0.001059	#ERROR!
CLEC14A	THAP9-AS1	-0.12311	0.017073	0.482449	0.005167	3.27414	0.00106	-/+
MCOLN1	THAP9-AS1	0.129212	0.012268	0.652552	5.18e-05	3.27356	0.001062	#ERROR!
CIP2A	THAP9-AS1	0.459141	0	0.816424	1.22e-08	3.27347	0.001062	#ERROR!
OR2L13	THAP9-AS1	-0.09942	0.054395	0.500521	0.003529	3.27337	0.001063	0/+
FHL1	THAP9-AS1	-0.1229	0.017261	0.482405	0.005171	3.27279	0.001065	-/+
HEY2	THAP9-AS1	0.094449	0.067702	0.631772	0.000105	3.27273	0.001065	0/+
DSG2-AS1	THAP9-AS1	0.407457	2.22e-16	-0.21366	0.240332	-3.27238	0.001066	#ERROR!
NUP155	THAP9-AS1	0.435189	0	0.806085	2.58e-08	3.27192	0.001068	#ERROR!
RASSF8	THAP9-AS1	0.054162	0.295508	0.606672	0.000232	3.27169	0.001069	0/+
PLA2R1	THAP9-AS1	0.168517	0.001053	0.674732	2.28e-05	3.27077	0.001073	#ERROR!
RPL18AP7	THAP9-AS1	0.062863	0.224566	0.612021	0.000197	3.27057	0.001073	0/+
ADAMTS9-AS2	THAP9-AS1	-0.06187	0.231951	0.527908	0.001901	3.27054	0.001073	0/+
LYRM4-AS1	THAP9-AS1	0.151071	0.003362	0.664834	3.32e-05	3.27053	0.001073	#ERROR!
NCK1	THAP9-AS1	0.38413	1.24e-14	0.783358	1.15e-07	3.27011	0.001075	#ERROR!
HMGN1	THAP9-AS1	0.517968	0	0.840436	1.77e-09	3.27006	0.001075	#ERROR!
EMP2	THAP9-AS1	0.204317	6.73e-05	0.694282	1.05e-05	3.26927	0.001078	#ERROR!
BACH2	THAP9-AS1	0.055146	0.286813	0.606966	0.00023	3.26907	0.001079	0/+
DENND10	THAP9-AS1	0.431453	0	0.804252	2.93e-08	3.26884	0.00108	#ERROR!
MAN1C1	THAP9-AS1	-0.1197	0.020419	0.484238	0.00498	3.26846	0.001081	-/+
SLC6A3	THAP9-AS1	-0.00443	0.93187	0.567777	0.0007	3.26789	0.001084	0/+
GDF10	THAP9-AS1	-0.11335	0.02818	0.489044	0.004506	3.26776	0.001084	-/+
TMEM255A	THAP9-AS1	-0.08831	0.087674	0.507974	0.002997	3.26724	0.001086	0/+
PEX1	THAP9-AS1	0.506636	0	0.83567	2.66e-09	3.26681	0.001088	#ERROR!
LRRC29	THAP9-AS1	-0.05286	0.307244	0.53359	0.001661	3.26485	0.001095	0/+
PI15	THAP9-AS1	0.139857	0.006675	0.657745	4.3e-05	3.26478	0.001095	#ERROR!
RGPD8	THAP9-AS1	0.325076	1.12e-10	0.75534	5.83e-07	3.26433	0.001097	#ERROR!
ARHGEF25	THAP9-AS1	-0.10123	0.050148	0.497801	0.003742	3.26428	0.001097	0/+
AKR1E2	THAP9-AS1	0.023508	0.649996	0.585938	0.000426	3.26426	0.001098	0/+
NPY5R	THAP9-AS1	-0.12114	0.018942	0.482367	0.005175	3.26353	0.0011	-/+
FNDC4	THAP9-AS1	-0.05798	0.262716	0.529692	0.001822	3.26334	0.001101	0/+
EPHB6	THAP9-AS1	-0.04092	0.429472	0.541839	0.00136	3.263	0.001102	0/+
MOCS1	THAP9-AS1	-0.05032	0.331107	0.535056	0.001604	3.26236	0.001105	0/+
BMERB1	THAP9-AS1	-0.06178	0.232687	0.52676	0.001953	3.26204	0.001106	0/+
DMGDH	THAP9-AS1	0.038691	0.455052	0.595526	0.000323	3.26189	0.001107	0/+
HSPA12A	THAP9-AS1	0.072492	0.161229	0.616935	0.000169	3.26162	0.001108	0/+
OMD	THAP9-AS1	-0.09638	0.06224	0.500962	0.003495	3.26087	0.001111	0/+
CD46	THAP9-AS1	0.520512	0	0.840909	1.7e-09	3.26064	0.001112	#ERROR!
CRMP1	THAP9-AS1	-0.01888	0.715478	0.556818	0.000933	3.25997	0.001114	0/+
LINC02511	THAP9-AS1	0.017963	0.728802	0.581716	0.000479	3.25993	0.001114	0/+
RGL1	THAP9-AS1	-0.01087	0.833852	0.562317	0.000809	3.25991	0.001114	0/+
RNF150	THAP9-AS1	-0.07434	0.15079	0.517229	0.002434	3.25962	0.001116	0/+
LOC100288866	THAP9-AS1	-0.00839	0.871422	0.563925	0.000776	3.25927	0.001117	0/+
CAVIN1	THAP9-AS1	-0.09476	0.066798	0.501833	0.003429	3.25848	0.00112	0/+
MLH1	THAP9-AS1	0.089786	0.082491	0.627199	0.000122	3.25827	0.001121	0/+
NUDT11	THAP9-AS1	-0.02628	0.612009	0.551288	0.001075	3.25703	0.001126	0/+
ANK2	THAP9-AS1	-0.04648	0.3694	0.537023	0.001529	3.25686	0.001127	0/+
NTAN1	THAP9-AS1	0.063075	0.223001	0.610449	0.000207	3.25686	0.001127	0/+
HSPB6	THAP9-AS1	-0.15832	0.002105	0.451613	0.00947	3.25641	0.001128	-/+
NDUFA4L2	THAP9-AS1	0.009151	0.859813	0.575383	0.000571	3.25637	0.001128	0/+
SSR4P1	THAP9-AS1	-0.02197	0.671552	0.554058	0.001002	3.2554	0.001132	0/+
ADCY5	THAP9-AS1	-0.13159	0.010746	0.472874	0.006273	3.25508	0.001134	-/+
COPZ2	THAP9-AS1	-0.08573	0.097399	0.508065	0.002991	3.25473	0.001135	0/+
CCDC130	THAP9-AS1	0.426226	0	0.800953	3.68e-08	3.2544	0.001136	#ERROR!
PPIP5K2	THAP9-AS1	0.582315	0	0.864736	1.76e-10	3.25377	0.001139	#ERROR!
BDKRB2	THAP9-AS1	0.059485	0.250515	0.607771	0.000225	3.25357	0.00114	0/+
PTPRS	THAP9-AS1	0.069569	0.178841	0.614003	0.000186	3.25264	0.001143	0/+
F2RL1	THAP9-AS1	0.385532	9.77e-15	-0.2346	0.196202	-3.25242	0.001144	#ERROR!
RN7SL483P	THAP9-AS1	-0.0483	0.350956	0.535015	0.001605	3.25185	0.001147	0/+
PGM5P4-AS1	THAP9-AS1	-0.13591	0.008408	0.468904	0.006788	3.25151	0.001148	-/+
NSUN7	THAP9-AS1	0.20315	7.42e-05	0.691716	1.16e-05	3.25053	0.001152	#ERROR!
TCF4	THAP9-AS1	0.069406	0.179863	0.613636	0.000188	3.2505	0.001152	0/+
GAS1	THAP9-AS1	-0.08339	0.106888	0.509164	0.002919	3.25037	0.001153	0/+
TIMP3	THAP9-AS1	-0.13366	0.009559	0.470308	0.006602	3.24908	0.001158	-/+
RELN	THAP9-AS1	-0.09726	0.059896	0.498534	0.003683	3.249	0.001158	0/+
APOD	THAP9-AS1	-0.20973	4.25e-05	0.406929	0.020811	3.24847	0.00116	-/+
PCDHB6	THAP9-AS1	-0.00381	0.941316	0.565481	0.000744	3.24774	0.001163	0/+
CRTAP	THAP9-AS1	0.020542	0.691736	0.581745	0.000479	3.24715	0.001166	0/+
SLITRK6	THAP9-AS1	0.071832	0.165086	0.614736	0.000181	3.24711	0.001166	0/+
TEN1-CDK3	THAP9-AS1	0.504624	0	0.833625	3.16e-09	3.24645	0.001169	#ERROR!
TG	THAP9-AS1	0.133244	0.00979	0.651811	5.31e-05	3.24639	0.001169	#ERROR!
MTBP	THAP9-AS1	0.54781	0	0.850962	6.84e-10	3.24631	0.001169	#ERROR!
LINC02572	THAP9-AS1	0.011327	0.826948	0.575425	0.00057	3.24573	0.001171	0/+
LRIT2	THAP9-AS1	0.018912	0.715088	0.580447	0.000496	3.2455	0.001172	0/+
RNU6-197P	THAP9-AS1	0.296139	5e-09	-0.3265	0.068175	-3.24534	0.001173	#ERROR!
LINC02202	THAP9-AS1	-0.01966	0.704337	0.55419	0.000998	3.24473	0.001176	0/+
PCDHGB4	THAP9-AS1	-0.04477	0.38734	0.536523	0.001548	3.24466	0.001176	0/+
MIR325HG	THAP9-AS1	0.00556	0.914541	0.571254	0.000638	3.24348	0.001181	0/+
MPP2	THAP9-AS1	-0.04987	0.335462	0.532673	0.001698	3.24329	0.001182	0/+
DENND2B	THAP9-AS1	0.084398	0.102719	0.622067	0.000144	3.24323	0.001182	0/+
S100A8	THAP9-AS1	0.002831	0.956429	0.569282	0.000673	3.2425	0.001185	0/+
GLRX3	THAP9-AS1	0.456952	0	0.813416	1.53e-08	3.24232	0.001186	#ERROR!
RN7SL234P	THAP9-AS1	0.0485	0.34896	0.599291	0.00029	3.24187	0.001187	0/+
SYNRG	THAP9-AS1	0.379304	2.8e-14	0.778959	1.51e-07	3.24171	0.001188	#ERROR!
TMOD1	THAP9-AS1	-0.07507	0.146802	0.513841	0.002628	3.24007	0.001195	0/+
NPIPB15	THAP9-AS1	0.28588	1.74e-08	0.733938	1.75e-06	3.24003	0.001195	#ERROR!
DDR2	THAP9-AS1	-0.01013	0.845056	0.560117	0.000857	3.23999	0.001195	0/+
STK38L	THAP9-AS1	0.377305	3.93e-14	0.777859	1.62e-07	3.23941	0.001198	#ERROR!
SLC22A15	THAP9-AS1	0.291618	8.72e-09	0.736707	1.53e-06	3.23886	0.0012	#ERROR!
CTIF	THAP9-AS1	0.000376	0.994209	0.567082	0.000714	3.23851	0.001202	0/+
GLT1D1	THAP9-AS1	0.048935	0.344644	0.599101	0.000291	3.23818	0.001203	0/+
GANC	THAP9-AS1	0.493285	0	0.828446	4.82e-09	3.23817	0.001203	#ERROR!
TMPRSS11BNL	THAP9-AS1	0.028914	0.576729	0.586005	0.000425	3.23751	0.001206	0/+
PPP3R1	THAP9-AS1	0.363506	3.71e-13	0.771261	2.39e-07	3.23689	0.001208	#ERROR!
SESN1	THAP9-AS1	0.166854	0.001182	0.670088	2.72e-05	3.23669	0.001209	#ERROR!
LRFN2	THAP9-AS1	-0.08944	0.083675	0.502525	0.003378	3.23612	0.001212	0/+
SLC2A4RG	THAP9-AS1	0.028387	0.583704	0.585411	0.000432	3.23561	0.001214	0/+
KLHL40	THAP9-AS1	-0.08242	0.111077	0.50768	0.003016	3.23532	0.001215	0/+
MEIS3	THAP9-AS1	-0.00213	0.967243	0.564934	0.000755	3.2352	0.001216	0/+
PRKD1	THAP9-AS1	0.044128	0.39416	0.5956	0.000323	3.23503	0.001216	0/+
HMCN2	THAP9-AS1	-0.02606	0.614972	0.548387	0.001156	3.23498	0.001217	0/+
SNX18	THAP9-AS1	0.048974	0.344262	0.598607	0.000296	3.2341	0.00122	0/+
THSD7A	THAP9-AS1	0.055962	0.279727	0.603061	0.000259	3.23391	0.001221	0/+
HS3ST3A1	THAP9-AS1	-0.00337	0.948123	0.563835	0.000777	3.23334	0.001224	0/+
CTF1	THAP9-AS1	-0.04757	0.358308	0.532857	0.00169	3.23294	0.001225	0/+
LINC01465	THAP9-AS1	-0.02883	0.577852	0.546038	0.001226	3.23206	0.001229	0/+
JPH3	THAP9-AS1	-0.0307	0.553403	0.544654	0.001269	3.23158	0.001231	0/+
SASS6	THAP9-AS1	0.562711	0	0.856017	4.23e-10	3.23155	0.001231	#ERROR!
COL6A6	THAP9-AS1	0.097111	0.060284	0.628383	0.000118	3.23088	0.001234	0/+
RILPL1	THAP9-AS1	0.054306	0.294227	0.601595	0.000271	3.23069	0.001235	0/+
SMIM17	THAP9-AS1	0.073808	0.153736	0.613899	0.000186	3.23033	0.001236	0/+
LINC02310	THAP9-AS1	-0.03682	0.477216	0.540146	0.001417	3.23024	0.001237	0/+
LONRF2	THAP9-AS1	-0.04883	0.345715	0.531525	0.001745	3.22994	0.001238	0/+
ACAD9	THAP9-AS1	0.338439	1.68e-11	0.758798	4.83e-07	3.2295	0.00124	#ERROR!
MEGF9	THAP9-AS1	0.292067	8.26e-09	0.73607	1.58e-06	3.22938	0.001241	#ERROR!
FGF4	THAP9-AS1	0.142879	0.005574	-0.45985	0.008098	-3.22917	0.001241	#ERROR!
PLEKHG5	THAP9-AS1	0.35237	2.1e-12	0.765396	3.35e-07	3.2291	0.001242	#ERROR!
SLC46A2	THAP9-AS1	0.046174	0.372587	0.596144	0.000318	3.22895	0.001242	0/+
RPRD1B	THAP9-AS1	0.419592	0	0.796188	5.07e-08	3.22883	0.001243	#ERROR!
MAP2K1	THAP9-AS1	0.404028	4.44e-16	0.789223	7.98e-08	3.22883	0.001243	#ERROR!
LOC101928118	THAP9-AS1	0.008548	0.868959	0.571272	0.000638	3.22856	0.001244	0/+
P2RY14	THAP9-AS1	-0.07416	0.151777	0.51283	0.002689	3.22855	0.001244	0/+
LOC112267983	THAP9-AS1	0.246385	1.37e-06	0.712517	4.77e-06	3.22784	0.001247	#ERROR!
PTCH2	THAP9-AS1	-0.01125	0.828135	0.557551	0.000916	3.22685	0.001252	0/+
ARHGEF15	THAP9-AS1	-0.0864	0.094774	0.503299	0.003321	3.22591	0.001256	0/+
TNC	THAP9-AS1	0.008949	0.862874	0.571114	0.000641	3.22536	0.001258	0/+
RBP7	THAP9-AS1	-0.10727	0.037859	0.487259	0.004677	3.22496	0.00126	-/+
DCAF4	THAP9-AS1	0.42495	0	0.798277	4.41e-08	3.22487	0.00126	#ERROR!
LGI4	THAP9-AS1	-0.09757	0.059079	0.494683	0.004	3.22484	0.00126	0/+
FBXW10	THAP9-AS1	0.164429	0.001397	0.667345	3.02e-05	3.22426	0.001263	#ERROR!
LRRC32	THAP9-AS1	-0.08652	0.094328	0.502933	0.003348	3.22403	0.001264	0/+
TAF5	THAP9-AS1	0.47791	0	0.821114	8.56e-09	3.22401	0.001264	#ERROR!
RBM48	THAP9-AS1	0.453202	0	0.810558	1.88e-08	3.22388	0.001265	#ERROR!
TMEM131L	THAP9-AS1	0.169061	0.001014	0.669844	2.75e-05	3.22302	0.001268	#ERROR!
DUSP13	THAP9-AS1	0.001259	0.980618	0.565591	0.000742	3.223	0.001269	0/+
FBXO38	THAP9-AS1	0.473762	0	0.819282	9.85e-09	3.22281	0.001269	#ERROR!
RNF212	THAP9-AS1	-0.02689	0.603689	0.546105	0.001224	3.22277	0.00127	0/+
IP6K1	THAP9-AS1	0.248276	1.13e-06	0.712977	4.67e-06	3.2224	0.001271	#ERROR!
CCDC71L	THAP9-AS1	0.08851	0.086967	0.622067	0.000144	3.22235	0.001271	0/+
KCNJ2-AS1	THAP9-AS1	0.114121	0.02712	0.63758	8.68e-05	3.22153	0.001275	#ERROR!
LOC102724301	THAP9-AS1	0.089748	0.082624	0.62265	0.000141	3.22085	0.001278	0/+
HNF4A	THAP9-AS1	0.292013	8.31e-09	-0.32609	0.068543	-3.22027	0.001281	#ERROR!
LINC01315	THAP9-AS1	0.076207	0.140761	0.614116	0.000185	3.21993	0.001282	0/+
CITED4	THAP9-AS1	0.000298	0.995413	0.564516	0.000764	3.21989	0.001282	0/+
DDX43	THAP9-AS1	0.105981	0.040243	0.63238	0.000103	3.21914	0.001286	#ERROR!
TRMT2B	THAP9-AS1	0.308673	1.01e-09	0.743402	1.09e-06	3.219	0.001286	#ERROR!
CEP19	THAP9-AS1	0.089331	0.084066	0.621872	0.000145	3.21658	0.001297	0/+
CSKMT	THAP9-AS1	0.366129	2.44e-13	0.770852	2.45e-07	3.21657	0.001297	#ERROR!
MIR3671	THAP9-AS1	0.239302	2.77e-06	0.70767	5.91e-06	3.21651	0.001298	#ERROR!
IRF2BPL	THAP9-AS1	0.007469	0.88537	0.568915	0.00068	3.2164	0.001298	0/+
TEPSIN	THAP9-AS1	0.486091	0	0.824047	6.82e-09	3.216	0.0013	#ERROR!
EGLN1	THAP9-AS1	0.345432	5.99e-12	0.760997	4.28e-07	3.21583	0.001301	#ERROR!
KTN1-AS1	THAP9-AS1	0.214594	2.78e-05	0.694345	1.04e-05	3.21574	0.001301	#ERROR!
PITPNM2	THAP9-AS1	0.129227	0.012258	0.645894	6.54e-05	3.2155	0.001302	#ERROR!
TPRXL	THAP9-AS1	0.167137	0.001159	0.667902	2.96e-05	3.21529	0.001303	#ERROR!
KRT24	THAP9-AS1	0.04536	0.381075	0.593856	0.000339	3.21521	0.001303	0/+
CACNA2D3	THAP9-AS1	-0.03725	0.471996	0.537623	0.001507	3.21453	0.001307	0/+
PRR15L	THAP9-AS1	0.394513	2e-15	-0.21738	0.232051	-3.21432	0.001308	#ERROR!
SLC25A29	THAP9-AS1	0.358885	7.68e-13	0.767229	3.01e-07	3.2139	0.001309	#ERROR!
C11orf45	THAP9-AS1	0.006671	0.897558	0.567971	0.000697	3.2134	0.001312	0/+
IL12A	THAP9-AS1	0.147219	0.004277	0.656155	4.55e-05	3.21282	0.001314	#ERROR!
APBB1	THAP9-AS1	-0.09633	0.062386	0.493768	0.004079	3.21244	0.001316	0/+
TRPC1	THAP9-AS1	0.084002	0.104346	0.618035	0.000164	3.21223	0.001317	0/+
KRT8P5	THAP9-AS1	0.296466	4.8e-09	-0.32027	0.073926	-3.2121	0.001318	#ERROR!
GNG7	THAP9-AS1	-0.08942	0.083746	0.498763	0.003665	3.21073	0.001324	0/+
KIAA1549L	THAP9-AS1	0.041349	0.424645	0.590651	0.000372	3.21058	0.001325	0/+
HECA	THAP9-AS1	0.381501	1.95e-14	0.777493	1.65e-07	3.21004	0.001327	#ERROR!
LRRC4B	THAP9-AS1	-0.07685	0.137456	0.508065	0.002991	3.20969	0.001329	0/+
KRT23	THAP9-AS1	-0.04621	0.372195	0.530485	0.001789	3.20944	0.00133	0/+
ANGPT2	THAP9-AS1	0.323844	1.33e-10	0.75	7.75e-07	3.20921	0.001331	#ERROR!
ACTR2	THAP9-AS1	0.458811	0	0.81195	1.7e-08	3.20872	0.001333	#ERROR!
TRIM22	THAP9-AS1	0.099604	0.053957	0.627199	0.000122	3.20836	0.001335	0/+
H1-0	THAP9-AS1	0.034402	0.50658	0.585777	0.000428	3.20809	0.001336	0/+
CRTC3	THAP9-AS1	0.127692	0.013337	0.644062	6.96e-05	3.20755	0.001339	#ERROR!
PLN	THAP9-AS1	-0.09823	0.057379	0.491569	0.004273	3.20746	0.001339	0/+
AGAP2-AS1	THAP9-AS1	0.087744	0.089741	0.619742	0.000155	3.20717	0.00134	0/+
PDPN	THAP9-AS1	0.047854	0.355421	0.594208	0.000336	3.20536	0.001349	0/+
ITPRIP	THAP9-AS1	0.085953	0.096513	0.618402	0.000162	3.20532	0.001349	0/+
LOC101927702	THAP9-AS1	0.296863	4.57e-09	0.736282	1.56e-06	3.20526	0.001349	#ERROR!
ADAMTS10	THAP9-AS1	0.015122	0.770386	0.572581	0.000616	3.20524	0.00135	0/+
LOC101928266	THAP9-AS1	0.052246	0.312953	0.597027	0.00031	3.20519	0.00135	0/+
NHLH2	THAP9-AS1	-0.01532	0.767462	0.551705	0.001063	3.20483	0.001351	0/+
TARBP1	THAP9-AS1	0.524131	0	0.839076	1.99e-09	3.2042	0.001354	#ERROR!
FIBIN	THAP9-AS1	-0.05535	0.285011	0.523094	0.002127	3.20406	0.001355	0/+
DES	THAP9-AS1	-0.16632	0.001227	0.436584	0.012482	3.20347	0.001358	-/+
RAET1G	THAP9-AS1	0.067863	0.189762	0.606789	0.000232	3.20335	0.001358	0/+
RNF8	THAP9-AS1	0.432908	0	0.80022	3.87e-08	3.20283	0.001361	#ERROR!
NAMPT	THAP9-AS1	0.33179	4.36e-11	0.753299	6.51e-07	3.20257	0.001362	#ERROR!
TIMM29	THAP9-AS1	0.245096	1.56e-06	0.709193	5.53e-06	3.20089	0.00137	#ERROR!
BORCS5	THAP9-AS1	0.296504	4.78e-09	0.735704	1.61e-06	3.20088	0.00137	#ERROR!
SPART	THAP9-AS1	0.076871	0.137325	0.61217	0.000196	3.20086	0.00137	0/+
CCT6A	THAP9-AS1	0.506921	0	0.831745	3.68e-09	3.20001	0.001374	#ERROR!
AUTS2	THAP9-AS1	0.198759	0.000107	0.684018	1.59e-05	3.19997	0.001374	#ERROR!
IP6K3	THAP9-AS1	0.004201	0.935376	0.564385	0.000766	3.19925	0.001378	0/+
ATMIN	THAP9-AS1	0.436826	0	0.801686	3.5e-08	3.19909	0.001379	#ERROR!
SBNO2	THAP9-AS1	0.243086	1.9e-06	0.707845	5.86e-06	3.19802	0.001384	#ERROR!
ABCC9	THAP9-AS1	-0.02959	0.567906	0.540689	0.001399	3.19764	0.001386	0/+
MAMLD1	THAP9-AS1	0.10839	0.035892	0.631232	0.000107	3.19724	0.001388	#ERROR!
PMS2CL	THAP9-AS1	0.376614	4.4e-14	0.774194	2.01e-07	3.19704	0.001388	#ERROR!
TNS2	THAP9-AS1	-0.02165	0.676001	0.546188	0.001221	3.19695	0.001389	0/+
RNA5SP233	THAP9-AS1	0.078493	0.129197	0.612672	0.000193	3.19668	0.00139	0/+
SLC35E4	THAP9-AS1	0.072473	0.161335	0.608871	0.000217	3.19664	0.00139	0/+
TBC1D20	THAP9-AS1	0.325336	1.08e-10	0.749633	7.9e-07	3.19659	0.001391	#ERROR!
RBMS1	THAP9-AS1	0.189686	0.00022	0.678519	1.97e-05	3.19577	0.001395	#ERROR!
CPXM2	THAP9-AS1	-0.13043	0.011465	0.464443	0.007408	3.19471	0.0014	-/+
BTBD1	THAP9-AS1	0.464485	0	0.813416	1.53e-08	3.19414	0.001402	#ERROR!
NFIA	THAP9-AS1	0.159063	0.002004	0.660924	3.83e-05	3.19413	0.001403	#ERROR!
KLHL24	THAP9-AS1	0.40337	4.44e-16	0.78629	9.61e-08	3.19386	0.001404	#ERROR!
RTN4RL2	THAP9-AS1	0.055328	0.285225	0.597488	0.000305	3.19323	0.001407	0/+
ANKRD29	THAP9-AS1	0.000316	0.995127	0.560902	0.00084	3.19315	0.001407	0/+
EPHA6	THAP9-AS1	-0.15585	0.002475	0.443589	0.010991	3.19308	0.001408	-/+
C9orf16	THAP9-AS1	0.068097	0.188234	0.605572	0.00024	3.19247	0.001411	0/+
STAT2	THAP9-AS1	0.369608	1.39e-13	0.770528	2.49e-07	3.19227	0.001412	#ERROR!
ANKHD1-EIF4EBP3	THAP9-AS1	0.447946	0	0.806085	2.58e-08	3.19209	0.001412	#ERROR!
CD93	THAP9-AS1	0.016122	0.755664	0.571481	0.000634	3.19196	0.001413	0/+
RRM1	THAP9-AS1	0.469124	0	0.815249	1.33e-08	3.19167	0.001415	#ERROR!
SIPA1L2	THAP9-AS1	0.233293	4.98e-06	0.701979	7.56e-06	3.1916	0.001415	#ERROR!
RTL5	THAP9-AS1	-0.12337	0.016841	0.469575	0.006698	3.1916	0.001415	-/+
HSPB2	THAP9-AS1	-0.00902	0.861799	0.554221	0.000997	3.19135	0.001416	0/+
ATP6V1B1	THAP9-AS1	0.148893	0.003855	0.654686	4.8e-05	3.19121	0.001417	#ERROR!
SDR9C7	THAP9-AS1	0.025495	0.622615	0.577639	0.000536	3.19103	0.001418	0/+
PEX10	THAP9-AS1	0.195014	0.000144	0.680964	1.79e-05	3.1908	0.001419	#ERROR!
GJA1	THAP9-AS1	0.081237	0.116302	0.613636	0.000188	3.19056	0.00142	0/+
SCAF11	THAP9-AS1	0.547867	0	0.847874	9.11e-10	3.19003	0.001423	#ERROR!
TGM2	THAP9-AS1	-0.10714	0.038089	0.482038	0.005211	3.18994	0.001423	-/+
RERG	THAP9-AS1	-0.0919	0.075491	0.493768	0.004079	3.18993	0.001423	0/+
KEAP1	THAP9-AS1	0.165606	0.001289	0.664223	3.39e-05	3.18991	0.001423	#ERROR!
ADAM22	THAP9-AS1	0.201237	8.7e-05	0.684326	1.57e-05	3.18989	0.001423	#ERROR!
SOX12	THAP9-AS1	0.137323	0.007745	0.647727	6.13e-05	3.18986	0.001423	#ERROR!
PRUNE2	THAP9-AS1	-0.04772	0.356749	0.526393	0.00197	3.18846	0.00143	0/+
DLK2	THAP9-AS1	0.242506	2.02e-06	0.706584	6.2e-06	3.18842	0.001431	#ERROR!
TRIM41	THAP9-AS1	0.378258	3.35e-14	0.774265	2e-07	3.18827	0.001431	#ERROR!
CASTOR1	THAP9-AS1	0.060799	0.240186	0.600348	0.000281	3.18804	0.001432	0/+
FBXO4	THAP9-AS1	0.412115	0	0.789734	7.72e-08	3.18679	0.001439	#ERROR!
SENP1	THAP9-AS1	0.439742	0	0.802053	3.41e-08	3.18609	0.001442	#ERROR!
SRGAP3	THAP9-AS1	0.188988	0.000233	0.677053	2.09e-05	3.18576	0.001444	#ERROR!
TREX2	THAP9-AS1	0.186536	0.000281	0.675656	2.2e-05	3.18559	0.001445	#ERROR!
LINC00924	THAP9-AS1	-0.05812	0.261536	0.51839	0.00237	3.18556	0.001445	0/+
HTR3B	THAP9-AS1	-0.03535	0.494888	0.534788	0.001614	3.18491	0.001448	0/+
SCARF1	THAP9-AS1	0.053606	0.300506	0.595308	0.000325	3.18488	0.001448	0/+
DNAJC18	THAP9-AS1	0.084699	0.101494	0.615103	0.000179	3.18486	0.001448	0/+
DACT3	THAP9-AS1	-0.16568	0.001282	0.434018	0.013069	3.18422	0.001451	-/+
TGFBR3	THAP9-AS1	0.084394	0.102733	0.614736	0.000181	3.18344	0.001455	0/+
PIFO	THAP9-AS1	-0.1133	0.028248	0.476217	0.005866	3.18327	0.001456	-/+
PHF21B	THAP9-AS1	-0.07116	0.169107	0.508347	0.002972	3.18279	0.001459	0/+
ACTA2	THAP9-AS1	-0.07398	0.152755	0.506232	0.003114	3.18276	0.001459	0/+
ROM1	THAP9-AS1	0.037167	0.473018	0.584212	0.000447	3.18216	0.001462	0/+
CD274	THAP9-AS1	0.219047	1.87e-05	0.693309	1.09e-05	3.18213	0.001462	#ERROR!
LPP-AS2	THAP9-AS1	0.097621	0.058942	0.622801	0.000141	3.18208	0.001462	0/+
DIO3	THAP9-AS1	-0.13073	0.011274	0.462047	0.007761	3.18089	0.001468	-/+
MSTN	THAP9-AS1	0.32611	9.69e-11	0.748624	8.33e-07	3.18064	0.001469	#ERROR!
FAM160B1	THAP9-AS1	0.377846	3.6e-14	0.77346	2.1e-07	3.18059	0.00147	#ERROR!
HACD4	THAP9-AS1	0.022229	0.667868	0.574047	0.000592	3.18042	0.001471	0/+
GOLGA8M	THAP9-AS1	0.062469	0.227494	0.600449	0.00028	3.18039	0.001471	0/+
ADAMTS9-AS1	THAP9-AS1	0.023389	0.65164	0.574808	0.00058	3.18029	0.001471	0/+
RUNX1T1	THAP9-AS1	-0.04141	0.423957	0.529692	0.001822	3.17965	0.001475	0/+
ITGBL1	THAP9-AS1	-0.08657	0.09412	0.495968	0.003892	3.17755	0.001485	0/+
FAM228B	THAP9-AS1	0.132355	0.010294	0.643328	7.14e-05	3.17735	0.001486	#ERROR!
MYO3A	THAP9-AS1	0.075197	0.146119	0.608177	0.000222	3.17729	0.001487	0/+
DAB2	THAP9-AS1	0.016473	0.750518	0.569648	0.000666	3.1765	0.001491	0/+
MSRB3	THAP9-AS1	-0.0076	0.883337	0.553152	0.001025	3.17644	0.001491	0/+
CMAHP	THAP9-AS1	0.147609	0.004175	0.652186	5.24e-05	3.17585	0.001494	#ERROR!
C12orf66	THAP9-AS1	0.366909	2.15e-13	0.767919	2.9e-07	3.17581	0.001494	#ERROR!
NOD1	THAP9-AS1	0.226809	9.19e-06	0.696848	9.39e-06	3.17547	0.001496	#ERROR!
H2AJ	THAP9-AS1	-0.02255	0.663389	0.542522	0.001337	3.17523	0.001497	0/+
SLC17A7	THAP9-AS1	-0.12075	0.01933	0.469111	0.00676	3.17522	0.001497	-/+
RN7SL362P	THAP9-AS1	0.050392	0.330451	0.591909	0.000359	3.17468	0.0015	0/+
CNNM1	THAP9-AS1	-0.00363	0.944215	0.555637	0.000962	3.17448	0.001501	0/+
MYLK	THAP9-AS1	-0.06937	0.180111	0.508431	0.002967	3.1743	0.001502	0/+
PPP1R3B	THAP9-AS1	0.271893	8.86e-08	0.720557	3.31e-06	3.17333	0.001507	#ERROR!
MMS19	THAP9-AS1	0.466983	0	0.81305	1.57e-08	3.17262	0.001511	#ERROR!
GRIN2A	THAP9-AS1	-0.14783	0.004119	0.446848	0.01035	3.17221	0.001513	-/+
HPSE2	THAP9-AS1	-0.08945	0.083637	0.492897	0.004155	3.1717	0.001515	0/+
DESI1	THAP9-AS1	0.268225	1.34e-07	0.718475	3.64e-06	3.1715	0.001517	#ERROR!
KRT8P17	THAP9-AS1	0.274793	6.37e-08	-0.33396	0.061758	-3.17041	0.001522	#ERROR!
SPRY3	THAP9-AS1	0.312882	5.83e-10	0.741155	1.22e-06	3.17032	0.001523	#ERROR!
KLHL5	THAP9-AS1	0.085854	0.0969	0.614003	0.000186	3.17009	0.001524	0/+
LANCL3	THAP9-AS1	0.129713	0.011933	0.64088	7.76e-05	3.1699	0.001525	#ERROR!
CDK2	THAP9-AS1	0.374999	5.75e-14	0.771261	2.39e-07	3.16984	0.001525	#ERROR!
TRAK2	THAP9-AS1	0.274268	6.77e-08	0.721408	3.18e-06	3.16932	0.001528	#ERROR!
MOB3A	THAP9-AS1	0.033847	0.513465	0.580279	0.000499	3.16892	0.00153	0/+
KCTD10	THAP9-AS1	0.17099	0.000885	0.664956	3.3e-05	3.16861	0.001532	#ERROR!
SIRT4	THAP9-AS1	0.103711	0.044742	0.624805	0.000132	3.16762	0.001537	#ERROR!
CNGA3	THAP9-AS1	-0.08625	0.095366	0.494545	0.004012	3.16641	0.001543	0/+
LIX1L	THAP9-AS1	0.044954	0.385358	0.587243	0.00041	3.16611	0.001545	0/+
MKRN7P	THAP9-AS1	0.069572	0.178824	0.603185	0.000258	3.16606	0.001545	0/+
TOP3B	THAP9-AS1	0.256112	4.98e-07	0.711548	4.98e-06	3.16563	0.001547	#ERROR!
PCDH7	THAP9-AS1	-0.09828	0.057244	0.485198	0.004882	3.16558	0.001548	0/+
RFC2	THAP9-AS1	0.284918	1.96e-08	0.72654	2.5e-06	3.16545	0.001548	#ERROR!
RGS9BP	THAP9-AS1	0.065626	0.204812	0.600572	0.000279	3.16539	0.001549	0/+
FLJ37453	THAP9-AS1	0.275042	6.19e-08	0.721408	3.18e-06	3.1651	0.00155	#ERROR!
NIBAN1	THAP9-AS1	-0.04561	0.378405	0.52456	0.002056	3.16506	0.00155	0/+
MPZL1	THAP9-AS1	0.385257	1.02e-14	0.77566	1.84e-07	3.16459	0.001553	#ERROR!
CA5B	THAP9-AS1	0.186557	0.000281	0.673387	2.4e-05	3.16451	0.001553	#ERROR!
HOXA5	THAP9-AS1	0.110677	0.032138	0.628666	0.000117	3.16414	0.001555	#ERROR!
EVL	THAP9-AS1	-0.01182	0.819564	0.548437	0.001154	3.16358	0.001558	0/+
NF2	THAP9-AS1	0.269765	1.13e-07	0.718475	3.64e-06	3.16315	0.001561	#ERROR!
KLHL36	THAP9-AS1	0.295625	5.33e-09	0.731672	1.96e-06	3.16174	0.001568	#ERROR!
C19orf71	THAP9-AS1	0.197728	0.000116	0.679377	1.91e-05	3.1617	0.001569	#ERROR!
CTTNBP2NL	THAP9-AS1	0.417861	0	0.790467	7.37e-08	3.16165	0.001569	#ERROR!
ITPR1	THAP9-AS1	0.017273	0.738829	0.568182	0.000693	3.16155	0.001569	0/+
ETAA1	THAP9-AS1	0.608472	0	0.870235	9.81e-11	3.16153	0.001569	#ERROR!
KRT18P17	THAP9-AS1	0.227749	8.42e-06	-0.37629	0.033786	-3.16145	0.00157	#ERROR!
EGFL7	THAP9-AS1	-0.00409	0.937058	0.553519	0.001015	3.16141	0.00157	0/+
KRT5	THAP9-AS1	-0.01542	0.766008	0.545289	0.001249	3.1591	0.001583	0/+
TRAM1L1	THAP9-AS1	-0.05132	0.321626	0.519483	0.002312	3.15871	0.001585	0/+
THBS4	THAP9-AS1	-0.17998	0.000461	0.417782	0.017347	3.15856	0.001586	-/+
RAE1	THAP9-AS1	0.343335	8.18e-12	0.755132	5.9e-07	3.15834	0.001587	#ERROR!
CDKN1C	THAP9-AS1	0.040965	0.428962	0.583578	0.000455	3.15814	0.001588	0/+
NPAT	THAP9-AS1	0.543675	0	0.844286	1.26e-09	3.15648	0.001597	#ERROR!
DMXL1	THAP9-AS1	0.385864	9.33e-15	0.775293	1.88e-07	3.15637	0.001597	#ERROR!
LOC101927189	THAP9-AS1	0.017486	0.735738	0.567626	0.000703	3.15634	0.001598	0/+
RNASEL	THAP9-AS1	0.287824	1.38e-08	0.727156	2.43e-06	3.15608	0.001599	#ERROR!
POLR3B	THAP9-AS1	0.454474	0	0.806452	2.51e-08	3.15607	0.001599	#ERROR!
AOPEP	THAP9-AS1	0.251045	8.47e-07	0.707845	5.86e-06	3.15532	0.001603	#ERROR!
RNF185	THAP9-AS1	0.224453	1.14e-05	0.693429	1.08e-05	3.15465	0.001607	#ERROR!
STXBP5-AS1	THAP9-AS1	0.248835	1.06e-06	0.706508	6.22e-06	3.15373	0.001612	#ERROR!
NUMBL	THAP9-AS1	0.101431	0.049679	0.621701	0.000146	3.15365	0.001612	#ERROR!
NANP	THAP9-AS1	0.511043	0	0.830614	4.04e-09	3.15356	0.001613	#ERROR!
TATDN2	THAP9-AS1	0.391018	3.77e-15	0.777452	1.66e-07	3.15317	0.001615	#ERROR!
MXRA7	THAP9-AS1	-0.06814	0.187974	0.506232	0.003114	3.15315	0.001615	0/+
PLPP7	THAP9-AS1	-0.14114	0.006185	0.44917	0.009912	3.15244	0.001619	-/+
PTPN1	THAP9-AS1	0.25228	7.45e-07	0.708211	5.77e-06	3.15238	0.001619	#ERROR!
CLDN34	THAP9-AS1	-0.00404	0.937784	0.552145	0.001051	3.1512	0.001626	0/+
TNFRSF19	THAP9-AS1	0.082104	0.112443	0.609238	0.000215	3.15077	0.001628	0/+
PPP2R5A	THAP9-AS1	0.419329	0	0.790323	7.44e-08	3.15074	0.001629	#ERROR!
APOBEC3C	THAP9-AS1	-0.02123	0.681928	0.539956	0.001424	3.15031	0.001631	0/+
GOT2P3	THAP9-AS1	0.054026	0.296727	0.591003	0.000369	3.1493	0.001637	0/+
TMEM107	THAP9-AS1	0.310678	7.8e-10	0.738154	1.42e-06	3.14924	0.001637	#ERROR!
CST4	THAP9-AS1	0.016482	0.750388	0.565948	0.000735	3.14894	0.001639	0/+
PSTK	THAP9-AS1	0.443265	0	0.800953	3.68e-08	3.14854	0.001641	#ERROR!
GFRA1	THAP9-AS1	-0.12921	0.012272	0.458211	0.008356	3.14854	0.001641	-/+
TBXA2R	THAP9-AS1	-0.10886	0.03509	0.47434	0.006091	3.14841	0.001642	-/+
ANXA1	THAP9-AS1	0.200064	9.59e-05	0.679252	1.92e-05	3.14828	0.001642	#ERROR!
PCA3	THAP9-AS1	-0.000752	0.988426	0.554027	0.001002	3.14828	0.001642	0/+
PUS7L	THAP9-AS1	0.542895	0	0.843475	1.35e-09	3.14788	0.001645	#ERROR!
NT5C1B	THAP9-AS1	0.314902	4.46e-10	0.740096	1.29e-06	3.14721	0.001648	#ERROR!
KCNA5	THAP9-AS1	-0.14438	0.00509	0.445646	0.010582	3.1469	0.00165	-/+
AARD	THAP9-AS1	-0.17474	0.000677	0.42031	0.016613	3.14674	0.001651	-/+
LINC00520	THAP9-AS1	0.201703	8.37e-05	-0.39702	0.024453	-3.14674	0.001651	#ERROR!
RAB2A	THAP9-AS1	0.464283	0	0.810117	1.94e-08	3.14671	0.001651	#ERROR!
CARM1	THAP9-AS1	0.222163	1.41e-05	0.691349	1.18e-05	3.14667	0.001651	#ERROR!
AKT3	THAP9-AS1	0.020811	0.687899	0.568548	0.000686	3.14644	0.001653	0/+
MIR4497	THAP9-AS1	-0.03131	0.54561	0.532166	0.001718	3.14603	0.001655	0/+
IGFL2	THAP9-AS1	0.033023	0.523786	0.576647	0.000551	3.14559	0.001658	0/+
DCN	THAP9-AS1	-0.06664	0.197891	0.506232	0.003114	3.14557	0.001658	0/+
DZIP1	THAP9-AS1	0.040263	0.436922	0.581432	0.000483	3.14532	0.001659	0/+
TCEANC	THAP9-AS1	0.203198	7.4e-05	0.680664	1.81e-05	3.14505	0.001661	#ERROR!
NRBP1	THAP9-AS1	0.191004	0.000199	0.673754	2.37e-05	3.14466	0.001663	#ERROR!
KIAA0930	THAP9-AS1	0.115115	0.025803	0.629032	0.000115	3.14455	0.001663	#ERROR!
KLHL13	THAP9-AS1	0.039839	0.441771	0.581012	0.000489	3.14427	0.001665	0/+
IFIH1	THAP9-AS1	0.295923	5.13e-09	0.730205	2.1e-06	3.14423	0.001665	#ERROR!
CDIN1	THAP9-AS1	0.281891	2.8e-08	0.722874	2.97e-06	3.14313	0.001672	#ERROR!
TCEAL2	THAP9-AS1	-0.1586	0.002066	0.433284	0.013241	3.14304	0.001672	-/+
DOCK4	THAP9-AS1	0.180824	0.000433	0.667766	2.97e-05	3.14295	0.001673	#ERROR!
LORICRIN	THAP9-AS1	-0.09045	0.080242	0.487746	0.00463	3.14259	0.001675	0/+
ITGA5	THAP9-AS1	0.006044	0.907132	0.557918	0.000907	3.14241	0.001676	0/+
LRRC37A	THAP9-AS1	0.341705	1.04e-11	0.752956	6.63e-07	3.14223	0.001677	#ERROR!
LOC100287042	THAP9-AS1	0.160329	0.001842	0.655786	4.61e-05	3.1419	0.001679	#ERROR!
LINC01891	THAP9-AS1	-0.00565	0.91323	0.549632	0.00112	3.1411	0.001683	0/+
LOC100505549	THAP9-AS1	0.316191	3.75e-10	0.740191	1.28e-06	3.14106	0.001683	#ERROR!
ABCA10	THAP9-AS1	0.214061	2.92e-05	0.686222	1.45e-05	3.14038	0.001687	#ERROR!
FAIM	THAP9-AS1	0.376112	4.8e-14	0.769315	2.67e-07	3.13921	0.001694	#ERROR!
LRRC20	THAP9-AS1	0.200548	9.21e-05	0.678519	1.97e-05	3.13889	0.001696	#ERROR!
RASL11A	THAP9-AS1	-0.17395	0.000717	0.419577	0.016823	3.13814	0.0017	-/+
KDM2A	THAP9-AS1	0.423815	0	0.791422	6.93e-08	3.13804	0.001701	#ERROR!
GAPDHP47	THAP9-AS1	0.04428	0.392535	0.583123	0.000461	3.13795	0.001701	0/+
SLC38A9	THAP9-AS1	0.376823	4.26e-14	0.769499	2.65e-07	3.1373	0.001705	#ERROR!
ABHD12B	THAP9-AS1	0.12858	0.012703	0.636365	9.04e-05	3.1373	0.001705	#ERROR!
AMACR	THAP9-AS1	0.100541	0.051727	0.619135	0.000158	3.13717	0.001706	0/+
DNAJB5	THAP9-AS1	-0.07904	0.126526	0.495601	0.003922	3.1369	0.001707	0/+
AASS	THAP9-AS1	0.256727	4.66e-07	0.708944	5.59e-06	3.13585	0.001714	#ERROR!
FAM120C	THAP9-AS1	0.195371	0.00014	0.67522	2.24e-05	3.13536	0.001716	#ERROR!
SNORA80B	THAP9-AS1	0.338359	1.7e-11	-0.26366	0.144814	-3.13494	0.001719	#ERROR!
RAD23B	THAP9-AS1	0.406804	2.22e-16	0.783358	1.15e-07	3.13469	0.00172	#ERROR!
MCUB	THAP9-AS1	0.367966	1.82e-13	0.765029	3.42e-07	3.13436	0.001722	#ERROR!
ARHGEF26-AS1	THAP9-AS1	0.012483	0.809602	0.561211	0.000833	3.13412	0.001724	0/+
LCA5	THAP9-AS1	0.258466	3.88e-07	0.709677	5.41e-06	3.1339	0.001725	#ERROR!
CCDC96	THAP9-AS1	0.115128	0.025786	0.627728	0.00012	3.13363	0.001727	#ERROR!
CRACR2B	THAP9-AS1	0.404878	4.44e-16	-0.1899	0.297872	-3.13205	0.001736	#ERROR!
LOC101927787	THAP9-AS1	0.052857	0.307316	0.587989	0.000402	3.13193	0.001737	0/+
MTREX	THAP9-AS1	0.506506	0	0.827346	5.26e-09	3.13177	0.001738	#ERROR!
MEPCE	THAP9-AS1	0.129084	0.012355	0.635997	9.15e-05	3.1316	0.001739	#ERROR!
SCML2	THAP9-AS1	0.245833	1.44e-06	0.702658	7.34e-06	3.13132	0.00174	#ERROR!
PCDHGB7	THAP9-AS1	-0.06676	0.197066	0.504032	0.003269	3.13132	0.00174	0/+
LINC02411	THAP9-AS1	0.018817	0.716452	-0.53899	0.001458	-3.13127	0.001741	0/-
RSPO1	THAP9-AS1	-0.1359	0.00841	0.450069	0.009748	3.13119	0.001741	-/+
HOXB4	THAP9-AS1	0.075432	0.144856	0.602511	0.000263	3.13105	0.001742	0/+
SH3PXD2A-AS1	THAP9-AS1	0.149608	0.003686	0.648193	6.03e-05	3.1307	0.001744	#ERROR!
CHRNB1	THAP9-AS1	0.22934	7.25e-06	0.693548	1.08e-05	3.12986	0.001749	#ERROR!
ADAMTS8	THAP9-AS1	-0.16997	0.000952	0.421554	0.016261	3.12958	0.001751	-/+
NEK10	THAP9-AS1	0.18491	0.000318	0.668562	2.89e-05	3.12888	0.001755	#ERROR!
REEP1	THAP9-AS1	-0.01591	0.758766	0.540689	0.001399	3.12871	0.001756	0/+
PRICKLE3	THAP9-AS1	0.303112	2.08e-09	0.732405	1.89e-06	3.12826	0.001758	#ERROR!
TMEM185B	THAP9-AS1	0.163763	0.001462	0.656218	4.54e-05	3.12796	0.00176	#ERROR!
DEF8	THAP9-AS1	0.223728	1.22e-05	0.690249	1.23e-05	3.12778	0.001761	#ERROR!
GPC1	THAP9-AS1	0.111315	0.031153	0.624633	0.000133	3.12744	0.001763	#ERROR!
PINK1	THAP9-AS1	-0.00202	0.968824	0.55022	0.001104	3.1271	0.001765	0/+
HNF4A-AS1	THAP9-AS1	0.283089	2.43e-08	-0.31821	0.075911	-3.12696	0.001766	#ERROR!
BTRC	THAP9-AS1	0.404207	4.44e-16	0.781525	1.29e-07	3.12654	0.001769	#ERROR!
PALM2AKAP2	THAP9-AS1	0.033633	0.516134	0.574526	0.000584	3.12652	0.001769	0/+
CPEB2	THAP9-AS1	0.362485	4.36e-13	0.76173	4.11e-07	3.12639	0.00177	#ERROR!
GPHN	THAP9-AS1	0.419315	0	0.78849	8.36e-08	3.12632	0.00177	#ERROR!
ETS1-AS1	THAP9-AS1	0.02428	0.639298	0.568155	0.000693	3.12603	0.001772	0/+
TMEM159	THAP9-AS1	0.200459	9.28e-05	0.677053	2.09e-05	3.12569	0.001774	#ERROR!
PALM	THAP9-AS1	-0.1503	0.00353	0.437317	0.012318	3.12524	0.001777	-/+
COL21A1	THAP9-AS1	-0.00523	0.919595	0.547704	0.001176	3.12511	0.001777	0/+
TMEM168	THAP9-AS1	0.507556	0	0.827346	5.26e-09	3.12464	0.00178	#ERROR!
PAK2	THAP9-AS1	0.415826	0	0.786657	9.39e-08	3.12329	0.001788	#ERROR!
RHBDL3	THAP9-AS1	-0.04131	0.425099	0.521644	0.0022	3.1231	0.00179	0/+
RBBP9	THAP9-AS1	0.340332	1.27e-11	0.750619	7.5e-07	3.12298	0.00179	#ERROR!
MMP14	THAP9-AS1	0.08472	0.101406	0.607405	0.000227	3.12283	0.001791	0/+
RASSF6	THAP9-AS1	0.440065	0	-0.14646	0.423795	-3.12261	0.001793	#ERROR!
HOXD8	THAP9-AS1	-0.0048	0.926184	0.547654	0.001177	3.12258	0.001793	0/+
PGAM1	THAP9-AS1	0.206295	5.7e-05	0.679985	1.86e-05	3.1224	0.001794	#ERROR!
SMAP1	THAP9-AS1	0.275888	5.62e-08	0.717742	3.77e-06	3.12219	0.001795	#ERROR!
PYGM	THAP9-AS1	-0.084	0.104339	0.489598	0.004454	3.12213	0.001796	0/+
CUL9	THAP9-AS1	0.339988	1.34e-11	0.750367	7.6e-07	3.12203	0.001796	#ERROR!
MON2	THAP9-AS1	0.453343	0	0.803519	3.08e-08	3.12127	0.001801	#ERROR!
BUB3	THAP9-AS1	0.512439	0	0.829179	4.54e-09	3.1208	0.001804	#ERROR!
DUSP7	THAP9-AS1	0.282574	2.58e-08	0.721107	3.23e-06	3.1208	0.001804	#ERROR!
SNHG31	THAP9-AS1	0.210184	4.09e-05	0.681993	1.72e-05	3.12078	0.001804	#ERROR!
HMG20A	THAP9-AS1	0.350685	2.72e-12	0.755499	5.78e-07	3.12054	0.001805	#ERROR!
NEURL1B	THAP9-AS1	0.03685	0.476807	0.57588	0.000563	3.12049	0.001805	0/+
PRICKLE2	THAP9-AS1	0.013683	0.791703	0.560117	0.000857	3.12004	0.001808	0/+
CDKAL1	THAP9-AS1	0.381985	1.78e-14	0.770528	2.49e-07	3.11966	0.001811	#ERROR!
BAP1	THAP9-AS1	0.296271	4.92e-09	0.728006	2.33e-06	3.11865	0.001817	#ERROR!
MPPED2	THAP9-AS1	-0.08884	0.085804	0.485337	0.004868	3.1185	0.001818	0/+
S100A9	THAP9-AS1	-0.01382	0.789664	0.540689	0.001399	3.11818	0.00182	0/+
CCDC102A	THAP9-AS1	-0.03731	0.471269	0.523827	0.002091	3.11808	0.00182	0/+
SIRT2	THAP9-AS1	0.075394	0.145061	0.600806	0.000277	3.11778	0.001822	0/+
ASPHD2	THAP9-AS1	0.299148	3.43e-09	-0.30059	0.094596	-3.11716	0.001826	#ERROR!
PALB2	THAP9-AS1	0.515763	0	0.830279	4.15e-09	3.11583	0.001834	#ERROR!
GCNT2P1	THAP9-AS1	0.187253	0.000266	0.668454	2.9e-05	3.11568	0.001835	#ERROR!
ADAMTS16	THAP9-AS1	0.097137	0.060214	0.614355	0.000184	3.11562	0.001836	0/+
ACR	THAP9-AS1	0.121711	0.018382	0.629598	0.000113	3.11557	0.001836	#ERROR!
LMOD1	THAP9-AS1	-0.09394	0.069192	0.480938	0.005329	3.11554	0.001836	0/+
FILIP1	THAP9-AS1	0.054462	0.292839	0.586877	0.000415	3.11527	0.001838	0/+
CENPBD1	THAP9-AS1	0.112526	0.029353	0.6239	0.000136	3.11521	0.001838	#ERROR!
FAM200A	THAP9-AS1	0.302373	2.28e-09	0.730822	2.04e-06	3.11521	0.001838	#ERROR!
DLX3	THAP9-AS1	-0.02179	0.673984	0.534594	0.001621	3.11517	0.001838	0/+
PCLO	THAP9-AS1	0.009382	0.856302	0.556452	0.000942	3.11488	0.00184	0/+
BCL6	THAP9-AS1	0.154423	0.002714	0.649194	5.83e-05	3.11458	0.001842	#ERROR!
NFATC3	THAP9-AS1	0.292781	7.57e-09	0.725806	2.59e-06	3.11441	0.001843	#ERROR!
SALL4	THAP9-AS1	0.141531	0.006043	0.641448	7.61e-05	3.11411	0.001845	#ERROR!
LOC107984360	THAP9-AS1	-0.01093	0.832871	0.542034	0.001353	3.11322	0.001851	0/+
NYNRIN	THAP9-AS1	0.097072	0.060388	0.614003	0.000186	3.1131	0.001851	0/+
DYNC2H1	THAP9-AS1	0.189609	0.000222	0.669478	2.79e-05	3.11271	0.001854	#ERROR!
ARMH3	THAP9-AS1	0.339413	1.46e-11	0.749267	8.06e-07	3.11265	0.001854	#ERROR!
ARHGEF26	THAP9-AS1	0.046673	0.367431	0.581378	0.000484	3.11256	0.001855	0/+
ARHGAP17	THAP9-AS1	0.371075	1.1e-13	0.764663	3.49e-07	3.11177	0.00186	#ERROR!
AHDC1	THAP9-AS1	0.190889	0.0002	0.670088	2.72e-05	3.11159	0.001861	#ERROR!
GAB2	THAP9-AS1	0.1095	0.034026	0.621575	0.000146	3.11151	0.001861	#ERROR!
SLC7A6	THAP9-AS1	0.342591	9.13e-12	0.750733	7.46e-07	3.11142	0.001862	#ERROR!
PGBD5	THAP9-AS1	0.017241	0.739295	0.561371	0.000829	3.11133	0.001862	0/+
LINC00472	THAP9-AS1	-0.01534	0.767098	0.538582	0.001472	3.11088	0.001865	0/+
CERS3	THAP9-AS1	0.139001	0.007021	0.639547	8.12e-05	3.11087	0.001865	#ERROR!
AKAP6	THAP9-AS1	-0.00355	0.9454	0.546788	0.001203	3.11005	0.001871	0/+
ARAP3	THAP9-AS1	0.159083	0.002001	0.651393	5.39e-05	3.10971	0.001873	#ERROR!
LOC100133091	THAP9-AS1	0.285844	1.75e-08	0.721723	3.14e-06	3.10935	0.001875	#ERROR!
LOC102724163	THAP9-AS1	-0.04011	0.438707	0.520479	0.00226	3.10898	0.001877	0/+
QRICH1	THAP9-AS1	0.465198	0	0.807918	2.27e-08	3.10875	0.001879	#ERROR!
TCEAL4	THAP9-AS1	0.11743	0.022948	0.6261	0.000127	3.10836	0.001881	#ERROR!
PITPNC1	THAP9-AS1	0.181987	0.000397	0.664589	3.35e-05	3.10811	0.001883	#ERROR!
SERTAD4	THAP9-AS1	0.11157	0.030766	0.622434	0.000142	3.10801	0.001884	#ERROR!
LRP12	THAP9-AS1	0.16427	0.001412	0.654202	4.88e-05	3.10754	0.001887	#ERROR!
ATP13A3	THAP9-AS1	0.462947	0	0.806818	2.45e-08	3.1073	0.001888	#ERROR!
PDCD7	THAP9-AS1	0.350028	3e-12	0.754032	6.26e-07	3.10715	0.001889	#ERROR!
PPP1R14B	THAP9-AS1	0.232291	5.48e-06	0.692815	1.11e-05	3.10704	0.00189	#ERROR!
IMPACT	THAP9-AS1	0.359839	6.62e-13	0.758798	4.83e-07	3.10671	0.001892	#ERROR!
LOC100419831	THAP9-AS1	0.341949	1e-11	0.75	7.75e-07	3.10663	0.001892	#ERROR!
TRIM15	THAP9-AS1	0.336346	2.27e-11	-0.26052	0.149842	-3.1065	0.001893	#ERROR!
RABGEF1	THAP9-AS1	0.232845	5.19e-06	0.693062	1.1e-05	3.10648	0.001893	#ERROR!
STUB1	THAP9-AS1	0.000106	0.998372	0.548754	0.001145	3.10579	0.001898	0/+
AMDHD1	THAP9-AS1	0.118127	0.022143	0.626138	0.000126	3.10511	0.001902	#ERROR!
FLNA	THAP9-AS1	-0.07651	0.139187	0.492669	0.004175	3.10451	0.001906	0/+
RYR3-DT	THAP9-AS1	-0.17153	0.000852	0.416061	0.017862	3.10411	0.001909	-/+
NEIL1	THAP9-AS1	0.407938	2.22e-16	0.781525	1.29e-07	3.10403	0.001909	#ERROR!
ACSM5	THAP9-AS1	-0.18621	0.000288	0.403412	0.022049	3.10393	0.00191	-/+
DCAF12L2	THAP9-AS1	-0.185	0.000316	0.404411	0.021691	3.10365	0.001911	-/+
LYPLAL1	THAP9-AS1	0.331327	4.66e-11	0.744386	1.04e-06	3.10295	0.001916	#ERROR!
IGSF11	THAP9-AS1	-0.03821	0.460728	0.52099	0.002233	3.10292	0.001916	0/+
SERPING1	THAP9-AS1	-0.08575	0.097301	0.485337	0.004868	3.10284	0.001917	0/+
PIK3CD	THAP9-AS1	0.025203	0.626613	0.565616	0.000742	3.10253	0.001919	0/+
CAPN2	THAP9-AS1	0.3368	2.13e-11	0.747067	9.04e-07	3.10235	0.00192	#ERROR!
PCDHB4	THAP9-AS1	0.046066	0.373707	0.579545	0.000509	3.1017	0.001924	0/+
LINC00607	THAP9-AS1	0.102891	0.046468	0.616169	0.000174	3.10104	0.001928	#ERROR!
CHTF8	THAP9-AS1	0.193654	0.000161	0.670455	2.69e-05	3.10048	0.001932	#ERROR!
SCRN3	THAP9-AS1	0.481613	0	0.814516	1.41e-08	3.09939	0.001939	#ERROR!
TMEM185A	THAP9-AS1	0.214768	2.74e-05	0.682185	1.71e-05	3.0984	0.001946	#ERROR!
TENM4	THAP9-AS1	-0.01251	0.809255	0.538722	0.001467	3.09758	0.001951	0/+
CACNB3	THAP9-AS1	0.272684	8.1e-08	0.713592	4.54e-06	3.09678	0.001956	#ERROR!
BAG5	THAP9-AS1	0.495469	0	0.820381	9.06e-09	3.09676	0.001956	#ERROR!
LOC392787	THAP9-AS1	-0.01788	0.730059	0.534779	0.001614	3.09673	0.001957	0/+
TMEM158	THAP9-AS1	0.009809	0.849838	0.554252	0.000997	3.09671	0.001957	0/+
PLP2	THAP9-AS1	0.217271	2.19e-05	0.683284	1.63e-05	3.09556	0.001964	#ERROR!
PRAM1	THAP9-AS1	-0.10099	0.050692	0.472367	0.006337	3.09549	0.001965	0/+
EDC4	THAP9-AS1	0.306898	1.28e-09	0.731305	1.99e-06	3.09531	0.001966	#ERROR!
PTEN	THAP9-AS1	0.390726	4e-15	0.772727	2.19e-07	3.09528	0.001966	#ERROR!
N4BP2	THAP9-AS1	0.503336	0	0.82368	7.02e-09	3.09522	0.001967	#ERROR!
A2M	THAP9-AS1	-0.06928	0.180628	0.496701	0.003831	3.09482	0.001969	0/+
LINC00639	THAP9-AS1	-0.12524	0.015233	0.452903	0.009243	3.09451	0.001971	-/+
TBX5-AS1	THAP9-AS1	-0.04817	0.352227	0.512354	0.002718	3.09387	0.001976	0/+
TCEAL3	THAP9-AS1	-0.0017	0.973807	0.545821	0.001232	3.0938	0.001976	0/+
LINC00652	THAP9-AS1	0.09786	0.058322	0.612106	0.000197	3.09379	0.001976	0/+
AP3B1	THAP9-AS1	0.489249	0	0.817449	1.13e-08	3.09327	0.00198	#ERROR!
TM4SF19	THAP9-AS1	0.114528	0.026574	0.622473	0.000142	3.09324	0.00198	#ERROR!
TBC1D31	THAP9-AS1	0.517965	0	0.829805	4.32e-09	3.09301	0.001981	#ERROR!
LOC441179	THAP9-AS1	0.076312	0.140212	0.59822	0.000299	3.09278	0.001983	0/+
PPIP5K1P1	THAP9-AS1	0.244419	1.67e-06	0.697973	8.96e-06	3.09258	0.001984	#ERROR!
EIF1B-AS1	THAP9-AS1	0.162623	0.001579	0.651508	5.37e-05	3.09241	0.001985	#ERROR!
TGFB1I1	THAP9-AS1	-0.08081	0.118246	0.487537	0.00465	3.09228	0.001986	0/+
SASH1	THAP9-AS1	0.206184	5.75e-05	0.676686	2.12e-05	3.0922	0.001987	#ERROR!
KRT8P10	THAP9-AS1	0.159343	0.001967	-0.42438	0.015486	-3.09191	0.001989	#ERROR!
COPS7A	THAP9-AS1	0.129008	0.012408	0.631232	0.000107	3.09188	0.001989	#ERROR!
DKK2	THAP9-AS1	0.034682	0.503134	0.570538	0.000651	3.09135	0.001992	0/+
BMT2	THAP9-AS1	0.398365	8.88e-16	0.776026	1.8e-07	3.09122	0.001993	#ERROR!
RASA1	THAP9-AS1	0.47792	0	0.812317	1.65e-08	3.09081	0.001996	#ERROR!
RNU6-701P	THAP9-AS1	0.124342	0.015988	0.628192	0.000118	3.09039	0.001999	#ERROR!
RTL8C	THAP9-AS1	-0.00661	0.898535	0.541789	0.001362	3.08967	0.002004	0/+
TMEM69	THAP9-AS1	0.51788	0	0.829545	4.41e-09	3.08941	0.002006	#ERROR!
MAP4K4	THAP9-AS1	0.323778	1.34e-10	0.73937	1.34e-06	3.08934	0.002006	#ERROR!
MIR100HG	THAP9-AS1	-0.06084	0.23988	0.502199	0.003402	3.08899	0.002008	0/+
FBXO24	THAP9-AS1	0.182296	0.000388	0.662633	3.6e-05	3.08889	0.002009	#ERROR!
REEP2	THAP9-AS1	-0.14673	0.004409	0.434424	0.012975	3.08887	0.002009	-/+
LINC01206	THAP9-AS1	0.103859	0.044436	0.615272	0.000178	3.08884	0.002009	#ERROR!
PART1	THAP9-AS1	-0.13859	0.007191	0.440982	0.011527	3.0879	0.002016	-/+
GSN	THAP9-AS1	-0.04234	0.413589	0.515762	0.002517	3.08779	0.002017	0/+
SFT2D2	THAP9-AS1	0.412264	0	0.782258	1.24e-07	3.08733	0.00202	#ERROR!
TBC1D14	THAP9-AS1	0.29137	8.99e-09	0.722507	3.02e-06	3.08724	0.00202	#ERROR!
CUEDC1	THAP9-AS1	0.087835	0.089409	0.604839	0.000246	3.08659	0.002025	0/+
NPPC	THAP9-AS1	-0.17927	0.000486	0.406453	0.020975	3.08611	0.002028	-/+
HLF	THAP9-AS1	0.032793	0.526679	0.568548	0.000686	3.08604	0.002028	0/+
MUC5AC	THAP9-AS1	0.164841	0.001358	-0.41862	0.0171	-3.08507	0.002035	#ERROR!
CHRNB4	THAP9-AS1	-0.0354	0.494363	0.5204	0.002264	3.08467	0.002038	0/+
ATR	THAP9-AS1	0.493964	0	0.818915	1.01e-08	3.08429	0.00204	#ERROR!
RRAGA	THAP9-AS1	0.146828	0.004382	0.641129	7.7e-05	3.08413	0.002041	#ERROR!
HAUS6	THAP9-AS1	0.586781	0	0.857771	3.56e-10	3.0837	0.002044	#ERROR!
SETSIP	THAP9-AS1	0.239551	2.71e-06	0.694392	1.04e-05	3.08362	0.002045	#ERROR!
LOC374443	THAP9-AS1	0.176942	0.000577	0.658906	4.12e-05	3.08343	0.002046	#ERROR!
GINS3	THAP9-AS1	0.400267	8.88e-16	0.776281	1.78e-07	3.08305	0.002049	#ERROR!
NFIA-AS2	THAP9-AS1	-0.07171	0.165804	0.493047	0.004142	3.08272	0.002051	0/+
SFTPD	THAP9-AS1	-0.0813	0.116006	0.485699	0.004832	3.08265	0.002052	0/+
LRIF1	THAP9-AS1	0.314932	4.44e-10	0.734238	1.73e-06	3.0824	0.002053	#ERROR!
MIR548I1	THAP9-AS1	0.190124	0.000213	0.666416	3.13e-05	3.08217	0.002055	#ERROR!
EPS8L3	THAP9-AS1	0.306563	1.33e-09	-0.28666	0.111689	-3.08149	0.00206	#ERROR!
ARMCX2	THAP9-AS1	-0.00743	0.886037	0.539956	0.001424	3.08074	0.002065	0/+
ANKH	THAP9-AS1	0.109274	0.0344	0.617669	0.000166	3.08072	0.002065	#ERROR!
KRT8P12	THAP9-AS1	0.315338	4.21e-10	0.73414	1.73e-06	3.07907	0.002076	#ERROR!
LOC101927495	THAP9-AS1	0.006456	0.900843	0.549409	0.001127	3.07852	0.00208	0/+
EPS15	THAP9-AS1	0.519471	0	0.829545	4.41e-09	3.07844	0.002081	#ERROR!
KIF3C	THAP9-AS1	-0.01671	0.747077	0.532991	0.001685	3.07825	0.002082	0/+
NELFCD	THAP9-AS1	0.327994	7.45e-11	0.740469	1.27e-06	3.07782	0.002085	#ERROR!
TBK1	THAP9-AS1	0.56063	0	0.846774	1.01e-09	3.07757	0.002087	#ERROR!
FRRS1L	THAP9-AS1	-0.0885	0.087001	0.479333	0.005507	3.07737	0.002088	0/+
NKPD1	THAP9-AS1	0.147246	0.00427	0.640575	7.84e-05	3.07725	0.002089	#ERROR!
PCBP1	THAP9-AS1	0.200027	9.62e-05	0.671554	2.58e-05	3.07716	0.00209	#ERROR!
DACT3-AS1	THAP9-AS1	0.117744	0.022583	0.622488	0.000142	3.07694	0.002091	#ERROR!
SPRR2E	THAP9-AS1	-0.00495	0.92387	0.541141	0.001383	3.07671	0.002093	0/+
SMARCAL1	THAP9-AS1	0.399286	8.88e-16	0.775293	1.88e-07	3.07643	0.002095	#ERROR!
CCDC187	THAP9-AS1	0.319897	2.28e-10	-0.27209	0.13194	-3.07635	0.002096	#ERROR!
SHQ1	THAP9-AS1	0.466996	0	0.806452	2.51e-08	3.07599	0.002098	#ERROR!
THBS3	THAP9-AS1	0.195786	0.000136	0.668988	2.84e-05	3.07592	0.002099	#ERROR!
THAP11	THAP9-AS1	0.155796	0.002483	0.645528	6.62e-05	3.0757	0.0021	#ERROR!
MRPS30	THAP9-AS1	0.453354	0	0.800293	3.85e-08	3.07568	0.0021	#ERROR!
ARL8B	THAP9-AS1	0.433138	0	0.791056	7.09e-08	3.07558	0.002101	#ERROR!
CLEC3B	THAP9-AS1	-0.23143	5.95e-06	0.358138	0.044152	3.07533	0.002103	-/+
CPSF4	THAP9-AS1	0.278708	4.06e-08	0.714692	4.32e-06	3.07525	0.002103	#ERROR!
STAT3	THAP9-AS1	0.242993	1.92e-06	0.695381	9.99e-06	3.07484	0.002106	#ERROR!
SLC6A9	THAP9-AS1	0.116891	0.023587	0.621701	0.000146	3.07483	0.002106	#ERROR!
PAXIP1	THAP9-AS1	0.4694	0	0.807442	2.34e-08	3.07478	0.002107	#ERROR!
DZIP1L	THAP9-AS1	0.039181	0.449356	0.57135	0.000637	3.07472	0.002107	0/+
SMG8	THAP9-AS1	0.30933	9.3e-10	0.730639	2.06e-06	3.07456	0.002108	#ERROR!
[truncated: 27,859 more rows]

## Sheet: THCA
Gene1	Gene2	TCGA_THCA.PrimarySolidTumor_cor	TCGA_THCA.PrimarySolidTumor_pVal	TCGA_THCA.SolidTissueNormal_cor	TCGA_THCA.SolidTissueNormal_pVal	zScoreDiff	pValDiff	Classes
SCN9A	THAP9-AS1	-0.07131	0.110541	0.558352	5.25e-06	4.7982	1.6e-06	0/+
SCARA3	THAP9-AS1	-0.02549	0.568776	0.573591	2.52e-06	4.63748	3.53e-06	0/+
STK32B	THAP9-AS1	0.107897	0.015584	0.655386	2.37e-08	4.62385	3.77e-06	#ERROR!
SGK3	THAP9-AS1	0.18376	3.44e-05	0.694475	1.48e-09	4.58498	4.54e-06	#ERROR!
LRRC15	THAP9-AS1	-0.10018	0.024795	0.50806	4.68e-05	4.51627	6.29e-06	-/+
LOX	THAP9-AS1	-0.11026	0.013443	0.500385	6.34e-05	4.5156	6.31e-06	-/+
MRC1	THAP9-AS1	-0.15284	0.00059	0.46204	0.000261	4.47065	7.8e-06	-/+
ANXA3	THAP9-AS1	0.042908	0.337356	0.599883	6.47e-07	4.44383	8.84e-06	0/+
NR2F1	THAP9-AS1	-0.06977	0.11845	0.52061	2.8e-05	4.42355	9.71e-06	0/+
ARMCX3	THAP9-AS1	0.080027	0.073224	0.619888	2.12e-07	4.40687	1.05e-05	0/+
MUC4	THAP9-AS1	0.089807	0.044302	0.621035	1.98e-07	4.35227	1.35e-05	#ERROR!
CREB5	THAP9-AS1	-0.06455	0.148719	0.510067	4.31e-05	4.28951	1.79e-05	0/+
CRISPLD2	THAP9-AS1	-0.03352	0.453697	0.528155	2.04e-05	4.24613	2.17e-05	0/+
EMP2	THAP9-AS1	0.021551	0.630005	0.564138	3.99e-06	4.22026	2.44e-05	0/+
SYT1	THAP9-AS1	-0.13762	0.001998	0.443398	0.00049	4.20402	2.62e-05	-/+
PTPRU	THAP9-AS1	-0.03839	0.390668	0.514212	3.64e-05	4.14865	3.34e-05	0/+
SNCAIP	THAP9-AS1	0.016944	0.704904	0.553014	6.74e-06	4.14123	3.45e-05	0/+
BEAN1	THAP9-AS1	-0.06814	0.127323	0.490716	9.2e-05	4.13772	3.51e-05	0/+
PRSS23	THAP9-AS1	-0.07981	0.07401	0.47669	0.000155	4.09273	4.26e-05	0/+
CDH20	THAP9-AS1	0.010549	0.813611	0.542708	1.08e-05	4.08429	4.42e-05	0/+
ADH6	THAP9-AS1	0.219916	6.49e-07	0.675502	5.99e-09	4.08285	4.45e-05	#ERROR!
NRP2	THAP9-AS1	-0.02185	0.625321	0.517811	3.14e-05	4.06895	4.72e-05	0/+
PCDHGB9P	THAP9-AS1	0.17878	5.62e-05	0.648359	3.74e-08	4.04533	5.22e-05	#ERROR!
MICAL2	THAP9-AS1	-0.06737	0.131717	0.479735	0.000139	4.0342	5.48e-05	0/+
PLS3	THAP9-AS1	0.118786	0.007716	0.609296	3.86e-07	4.02286	5.75e-05	#ERROR!
MUC20	THAP9-AS1	0.029535	0.509095	0.54956	7.9e-06	4.02118	5.79e-05	0/+
CDSN	THAP9-AS1	-0.08665	0.052348	0.462248	0.000259	4.01318	5.99e-05	0/+
CCBE1	THAP9-AS1	-0.02165	0.628453	0.511654	4.04e-05	4.01034	6.06e-05	0/+
LYNX1	THAP9-AS1	-0.03475	0.437204	0.501446	6.08e-05	4.00611	6.17e-05	0/+
MIR4731	THAP9-AS1	-0.07189	0.107651	0.470781	0.000192	3.9862	6.71e-05	0/+
RPS27P27	THAP9-AS1	0.02263	0.612977	-0.50607	5.06e-05	-3.96557	7.32e-05	0/-
BNC1	THAP9-AS1	-0.1064	0.017091	0.439035	0.000565	3.9503	7.81e-05	-/+
BEND6	THAP9-AS1	-0.09257	0.038139	0.447957	0.000422	3.93075	8.47e-05	-/+
HNMT	THAP9-AS1	-0.0213	0.633942	0.502453	5.84e-05	3.92331	8.73e-05	0/+
AMOT	THAP9-AS1	-0.05661	0.20545	0.474629	0.000167	3.91515	9.03e-05	0/+
KLK5	THAP9-AS1	-0.06966	0.119045	0.454622	0.000337	3.83031	0.000128	0/+
TM4SF1-AS1	THAP9-AS1	-0.09985	0.025276	0.429762	0.000761	3.82689	0.00013	-/+
KCNIP1	THAP9-AS1	-0.0046	0.918041	0.5039	5.52e-05	3.82236	0.000132	0/+
CNKSR2	THAP9-AS1	-0.07292	0.102679	0.450717	0.000385	3.81915	0.000134	0/+
DST	THAP9-AS1	-0.06206	0.165039	0.457487	0.000306	3.80284	0.000143	0/+
MYO3B	THAP9-AS1	0.10784	0.015639	0.57979	1.85e-06	3.78655	0.000153	#ERROR!
ARMCX6	THAP9-AS1	0.215769	1.06e-06	0.648158	3.79e-08	3.77982	0.000157	#ERROR!
JPH3	THAP9-AS1	0.035534	0.426956	0.528294	2.02e-05	3.77522	0.00016	0/+
PDGFRA	THAP9-AS1	-0.07375	0.09882	0.444759	0.000469	3.7739	0.000161	0/+
KCND2	THAP9-AS1	-0.05579	0.212124	0.458512	0.000295	3.76867	0.000164	0/+
SDC4	THAP9-AS1	-0.0547	0.221205	0.457703	0.000303	3.75419	0.000174	0/+
DIO3	THAP9-AS1	-0.10857	0.014946	0.413697	0.001247	3.75358	0.000174	-/+
SLIT2	THAP9-AS1	-0.04257	0.341142	0.466839	0.000221	3.75055	0.000176	0/+
FAM3C	THAP9-AS1	0.152047	0.000631	0.605174	4.85e-07	3.74656	0.000179	#ERROR!
MMP2	THAP9-AS1	0.015924	0.721902	0.508859	4.53e-05	3.72761	0.000193	0/+
PCDHGA11	THAP9-AS1	0.179927	5.03e-05	0.621102	1.97e-07	3.72506	0.000195	#ERROR!
SMIM3	THAP9-AS1	0.048476	0.278341	0.531662	1.75e-05	3.71859	0.0002	0/+
MGAT4B	THAP9-AS1	0.079696	0.074423	0.553618	6.55e-06	3.71704	0.000202	0/+
STAM	THAP9-AS1	0.110299	0.01341	0.574101	2.46e-06	3.71123	0.000206	#ERROR!
NR2F1-AS1	THAP9-AS1	-0.08149	0.068105	0.430841	0.000735	3.70941	0.000208	0/+
IFIT5	THAP9-AS1	0.004521	0.919513	0.498216	6.9e-05	3.70809	0.000209	0/+
SCN3A	THAP9-AS1	0.141648	0.001464	0.594272	8.74e-07	3.70282	0.000213	#ERROR!
EFNA5	THAP9-AS1	0.053165	0.234419	0.532463	1.69e-05	3.69409	0.000221	0/+
MMP14	THAP9-AS1	-0.04838	0.279313	0.453834	0.000346	3.6775	0.000236	0/+
SCN3B	THAP9-AS1	0.193051	1.33e-05	0.624431	1.62e-07	3.66927	0.000243	#ERROR!
ANKH	THAP9-AS1	0.062462	0.162309	0.535991	1.45e-05	3.66408	0.000248	0/+
PRSS3	THAP9-AS1	-0.01397	0.754884	0.477126	0.000153	3.64532	0.000267	0/+
RPL17P38	THAP9-AS1	0.190307	1.77e-05	0.619609	2.15e-07	3.63498	0.000278	#ERROR!
ANXA2	THAP9-AS1	-0.08003	0.073206	0.421496	0.000984	3.6213	0.000293	0/+
CAVIN1	THAP9-AS1	-0.05994	0.179966	0.436539	0.000613	3.60931	0.000307	0/+
PRICKLE1	THAP9-AS1	-0.03407	0.446295	0.456964	0.000311	3.6065	0.00031	0/+
ANXA5	THAP9-AS1	0.191319	1.59e-05	0.61674	2.54e-07	3.59607	0.000323	#ERROR!
PDPN	THAP9-AS1	-0.02706	0.545276	0.461231	0.000269	3.5955	0.000324	0/+
SCNN1A	THAP9-AS1	-0.07773	0.081893	0.420266	0.001022	3.59523	0.000324	0/+
NIPAL2	THAP9-AS1	0.213437	1.39e-06	0.630541	1.13e-07	3.5928	0.000327	#ERROR!
MAP2	THAP9-AS1	0.024759	0.57997	0.5005	6.31e-05	3.59051	0.00033	0/+
CCDC148-AS1	THAP9-AS1	0.111492	0.012434	0.562725	4.27e-06	3.58808	0.000333	#ERROR!
MFAP2	THAP9-AS1	0.031926	0.475411	0.505353	5.21e-05	3.58589	0.000336	0/+
MAP3K5	THAP9-AS1	0.001167	0.979191	0.481451	0.00013	3.58022	0.000343	0/+
SPTBN2	THAP9-AS1	-0.11542	0.009649	0.386512	0.002727	3.57969	0.000344	-/+
CHRDL1	THAP9-AS1	-0.03523	0.430892	0.452665	0.00036	3.57741	0.000347	0/+
MDFIC	THAP9-AS1	0.043033	0.335938	0.512458	3.91e-05	3.57539	0.00035	0/+
PLEKHA6	THAP9-AS1	-0.04431	0.321815	0.44492	0.000466	3.57325	0.000353	0/+
TMEM236	THAP9-AS1	-0.1263	0.004594	0.375255	0.003702	3.56521	0.000364	-/+
MPP7	THAP9-AS1	0.168594	0.000148	0.599053	6.77e-07	3.5648	0.000364	#ERROR!
MALRD1	THAP9-AS1	0.077249	0.0838	0.535587	1.48e-05	3.55862	0.000373	0/+
MTUS1	THAP9-AS1	0.219789	6.59e-07	0.630122	1.16e-07	3.54248	0.000396	#ERROR!
PLCD1	THAP9-AS1	0.083113	0.062778	0.537529	1.36e-05	3.53691	0.000405	0/+
NET1	THAP9-AS1	0.098793	0.026871	0.548511	8.29e-06	3.5353	0.000407	#ERROR!
ITGA3	THAP9-AS1	-0.04571	0.30668	0.438384	0.000578	3.52738	0.00042	0/+
FIGN	THAP9-AS1	0.11077	0.013017	0.555451	6.02e-06	3.52075	0.00043	#ERROR!
ITGA11	THAP9-AS1	-0.06193	0.165898	0.423155	0.000935	3.51075	0.000447	0/+
EHD2	THAP9-AS1	0.018969	0.67158	0.487234	0.000105	3.51016	0.000448	0/+
COL10A1	THAP9-AS1	-0.10086	0.023822	0.390218	0.002461	3.50884	0.00045	-/+
PI15	THAP9-AS1	-0.00179	0.968019	0.469028	0.000204	3.49076	0.000482	0/+
CORIN	THAP9-AS1	0.027015	0.545929	0.490767	9.18e-05	3.48687	0.000489	0/+
ACSM2B	THAP9-AS1	0.028195	0.528525	0.491141	9.06e-05	3.48216	0.000497	0/+
LINC01697	THAP9-AS1	0.053062	0.235328	0.509289	4.45e-05	3.47736	0.000506	0/+
C10orf55	THAP9-AS1	-0.09153	0.040373	0.393399	0.00225	3.47013	0.00052	-/+
ERBB3	THAP9-AS1	-0.00428	0.923728	0.464716	0.000238	3.47009	0.00052	0/+
ND4L	THAP9-AS1	0.124675	0.005153	0.559902	4.88e-06	3.46851	0.000523	#ERROR!
APOD	THAP9-AS1	-0.06227	0.163634	0.41762	0.001107	3.46707	0.000526	0/+
FIGNL2	THAP9-AS1	0.090455	0.042787	0.535176	1.5e-05	3.46375	0.000533	#ERROR!
DSC2	THAP9-AS1	-0.06924	0.121276	0.41049	0.001372	3.45615	0.000548	0/+
MACC1	THAP9-AS1	-0.07358	0.099602	0.406728	0.001533	3.45509	0.00055	0/+
PARVA	THAP9-AS1	0.073233	0.101227	0.521502	2.7e-05	3.4526	0.000555	0/+
MXRA8	THAP9-AS1	-0.0425	0.341959	0.431955	0.00071	3.45115	0.000558	0/+
COLEC12	THAP9-AS1	-0.10547	0.01809	0.379045	0.003344	3.45103	0.000558	-/+
LOC100421620	THAP9-AS1	0.048177	0.281316	-0.42684	0.000834	-3.44715	0.000567	0/-
TFAP2C	THAP9-AS1	-0.00136	0.975835	0.464254	0.000242	3.44603	0.000569	0/+
SLIT2-IT1	THAP9-AS1	-0.01573	0.725109	0.452585	0.000361	3.44333	0.000575	0/+
ART4	THAP9-AS1	0.074867	0.093817	0.520979	2.76e-05	3.43646	0.000589	0/+
DZIP1	THAP9-AS1	-0.00371	0.933978	0.461169	0.000269	3.43528	0.000592	0/+
MBOAT2	THAP9-AS1	0.043638	0.329187	0.497416	7.12e-05	3.43322	0.000596	0/+
THPO	THAP9-AS1	-0.00669	0.881194	0.457893	0.000301	3.42726	0.00061	0/+
C6orf141	THAP9-AS1	0.003689	0.9343	0.465181	0.000234	3.41963	0.000627	0/+
ACMSD	THAP9-AS1	0.291941	2.55e-11	0.664322	1.3e-08	3.41696	0.000633	#ERROR!
IL17RD	THAP9-AS1	-0.02222	0.619349	0.444279	0.000476	3.41665	0.000634	0/+
EVA1A	THAP9-AS1	-0.08517	0.056513	0.391647	0.002364	3.41219	0.000644	0/+
BRINP3	THAP9-AS1	0.069186	0.121592	0.513837	3.7e-05	3.40882	0.000652	0/+
CYTB	THAP9-AS1	0.095556	0.032313	0.533007	1.65e-05	3.40784	0.000655	#ERROR!
ACOT9	THAP9-AS1	0.160645	0.000302	0.578482	1.97e-06	3.40538	0.000661	#ERROR!
ADAMTS17	THAP9-AS1	0.16661	0.000177	0.582248	1.63e-06	3.4023	0.000668	#ERROR!
TCTEX1D1	THAP9-AS1	0.108684	0.01484	0.541739	1.12e-05	3.40107	0.000671	#ERROR!
LEPROT	THAP9-AS1	0.272906	5.04e-10	0.651194	3.11e-08	3.40017	0.000673	#ERROR!
FAP	THAP9-AS1	-0.08591	0.054416	0.389456	0.002513	3.39956	0.000675	0/+
GRID1-AS1	THAP9-AS1	0.25134	1.13e-08	0.637594	7.35e-08	3.39948	0.000675	#ERROR!
CTTN	THAP9-AS1	0.198637	7.32e-06	0.603236	5.4e-07	3.39702	0.000681	#ERROR!
PALLD	THAP9-AS1	0.102522	0.021598	0.536791	1.4e-05	3.39598	0.000684	#ERROR!
ACSM2A	THAP9-AS1	-0.01085	0.808468	0.450799	0.000383	3.39458	0.000687	0/+
FGF10	THAP9-AS1	-0.06824	0.126792	0.403781	0.001671	3.39426	0.000688	0/+
GULP1	THAP9-AS1	0.03384	0.449339	0.485327	0.000113	3.39135	0.000696	0/+
PTPRE	THAP9-AS1	-0.03995	0.37179	0.426363	0.000846	3.3868	0.000707	0/+
ESR1	THAP9-AS1	0.030135	0.500525	0.481735	0.000129	3.38465	0.000713	0/+
MAMLD1	THAP9-AS1	-0.07459	0.09503	0.397016	0.002031	3.38285	0.000717	0/+
PLRG1	THAP9-AS1	0.205681	3.37e-06	0.605399	4.79e-07	3.3701	0.000751	#ERROR!
GPR12	THAP9-AS1	-0.05009	0.262636	0.415946	0.001165	3.36971	0.000752	0/+
SEMA3A	THAP9-AS1	-0.04915	0.271684	0.416226	0.001155	3.3656	0.000764	0/+
TIMP2	THAP9-AS1	0.089019	0.046209	0.523194	2.51e-05	3.35988	0.00078	#ERROR!
CD276	THAP9-AS1	-0.05299	0.235965	0.412206	0.001304	3.35873	0.000783	0/+
NAV3	THAP9-AS1	0.014472	0.746346	0.466471	0.000224	3.35717	0.000787	0/+
SNORA80D	THAP9-AS1	0.168637	0.000147	0.579214	1.9e-06	3.35675	0.000789	#ERROR!
CBLN1	THAP9-AS1	-0.11289	0.01137	0.359153	0.005628	3.34492	0.000823	-/+
IGFN1	THAP9-AS1	0.042885	0.337608	0.48668	0.000107	3.34153	0.000833	0/+
ABTB2	THAP9-AS1	-0.07964	0.074644	0.387534	0.002651	3.34092	0.000835	0/+
LZTS1-AS1	THAP9-AS1	-0.05733	0.199717	0.406296	0.001553	3.33996	0.000838	0/+
SLC38A4	THAP9-AS1	0.03938	0.378607	0.483784	0.000119	3.33964	0.000839	0/+
ARHGAP23	THAP9-AS1	0.069875	0.117916	0.506168	5.04e-05	3.33323	0.000858	0/+
LINC01285	THAP9-AS1	0.200651	5.88e-06	0.598394	7.01e-07	3.33087	0.000866	#ERROR!
TBX1	THAP9-AS1	0.079844	0.073886	0.513174	3.8e-05	3.3294	0.00087	0/+
RDH5	THAP9-AS1	0.005479	0.902538	0.454372	0.00034	3.31369	0.000921	0/+
DCBLD2	THAP9-AS1	0.053516	0.231342	0.49151	8.93e-05	3.31209	0.000926	0/+
GCOM1	THAP9-AS1	0.017887	0.689298	0.463832	0.000245	3.3108	0.00093	0/+
BAALC	THAP9-AS1	-0.01085	0.808418	0.440903	0.000532	3.31016	0.000932	0/+
MGLL	THAP9-AS1	0.005007	0.910892	0.453311	0.000352	3.30778	0.00094	0/+
THBS2	THAP9-AS1	-0.11046	0.013274	0.355205	0.006217	3.29718	0.000977	-/+
MAML2	THAP9-AS1	0.098661	0.027076	0.523141	2.52e-05	3.29287	0.000992	#ERROR!
MSMO1	THAP9-AS1	0.145934	0.001041	0.556571	5.71e-06	3.28738	0.001011	#ERROR!
CAPN2	THAP9-AS1	0.162554	0.000255	0.568045	3.31e-06	3.2857	0.001017	#ERROR!
PHF24	THAP9-AS1	-0.01557	0.727796	0.434181	0.000661	3.28562	0.001018	0/+
ADAMTS12	THAP9-AS1	0.046017	0.303474	0.482786	0.000124	3.28528	0.001019	0/+
LINC00839	THAP9-AS1	0.014561	0.744848	0.458096	0.000299	3.28375	0.001024	0/+
ACBD3-AS1	THAP9-AS1	0.181584	4.27e-05	0.580723	1.76e-06	3.28098	0.001034	#ERROR!
CPN2	THAP9-AS1	-0.02641	0.554924	0.424702	0.000891	3.2803	0.001037	0/+
CST6	THAP9-AS1	-0.12326	0.005686	0.340998	0.008807	3.27538	0.001055	-/+
PODN	THAP9-AS1	-0.0847	0.057906	0.373939	0.003834	3.26707	0.001087	0/+
MEDAG	THAP9-AS1	-0.05981	0.180937	0.395253	0.002135	3.26702	0.001087	0/+
RN7SKP292	THAP9-AS1	0.030623	0.493619	0.468053	0.000211	3.26054	0.001112	0/+
RAD23B	THAP9-AS1	0.129173	0.003742	0.541836	1.12e-05	3.25993	0.001114	#ERROR!
RELN	THAP9-AS1	0.072253	0.105891	0.499369	6.59e-05	3.25469	0.001135	0/+
SLC29A1	THAP9-AS1	0.163965	0.000225	0.565584	3.72e-06	3.25101	0.00115	#ERROR!
LOC100128248	THAP9-AS1	-0.06689	0.134494	0.387209	0.002675	3.25069	0.001151	0/+
EYA2	THAP9-AS1	0.165473	0.000196	0.566537	3.56e-06	3.25	0.001154	#ERROR!
OSR1	THAP9-AS1	-0.03719	0.405673	0.411558	0.001329	3.24518	0.001174	0/+
PCDHA3	THAP9-AS1	0.1416	0.001469	0.549047	8.09e-06	3.24356	0.00118	#ERROR!
SREBF2	THAP9-AS1	0.113611	0.010853	0.528208	2.03e-05	3.23737	0.001206	#ERROR!
CNTN1	THAP9-AS1	-0.09869	0.027033	0.3578	0.005824	3.23613	0.001212	-/+
TMEM117	THAP9-AS1	0.125558	0.004843	0.536684	1.41e-05	3.23539	0.001215	#ERROR!
PGM5	THAP9-AS1	0.090414	0.042883	0.510713	4.2e-05	3.23381	0.001221	#ERROR!
CYP8B1	THAP9-AS1	0.124002	0.0054	0.535316	1.49e-05	3.23307	0.001225	#ERROR!
NBPF14	THAP9-AS1	0.190539	1.72e-05	0.582154	1.64e-06	3.23235	0.001228	#ERROR!
LINC00636	THAP9-AS1	0.008346	0.85202	0.446771	0.000439	3.22889	0.001243	0/+
APOB	THAP9-AS1	-0.10577	0.017758	0.350611	0.00697	3.22887	0.001243	-/+
DMD	THAP9-AS1	0.109193	0.014376	0.52384	2.44e-05	3.22667	0.001252	#ERROR!
HAGLR	THAP9-AS1	-0.06736	0.131743	0.383632	0.002952	3.22523	0.001259	0/+
ENPP7P1	THAP9-AS1	0.262974	2.19e-09	-0.19974	0.132776	-3.22512	0.001259	#ERROR!
CFTR	THAP9-AS1	-0.03954	0.376634	0.406805	0.00153	3.22225	0.001272	0/+
FLNC	THAP9-AS1	-0.03606	0.420123	0.409321	0.00142	3.21904	0.001286	0/+
GLYATL1	THAP9-AS1	0.040799	0.361656	0.47054	0.000194	3.21268	0.001315	0/+
LAMA2	THAP9-AS1	-0.00483	0.914028	0.434232	0.00066	3.2126	0.001315	0/+
MMP27	THAP9-AS1	-0.11058	0.013175	0.342572	0.00848	3.19966	0.001376	-/+
THRB	THAP9-AS1	0.085689	0.055031	0.503099	5.7e-05	3.19632	0.001392	0/+
PCSK6	THAP9-AS1	0.250041	1.36e-08	0.618215	2.33e-07	3.1902	0.001422	#ERROR!
ADGRG3	THAP9-AS1	0.131891	0.00307	0.536441	1.42e-05	3.18902	0.001428	#ERROR!
SEMA3B	THAP9-AS1	0.017153	0.701435	0.44842	0.000415	3.18277	0.001459	0/+
ETNK2	THAP9-AS1	0.042087	0.34668	0.467938	0.000212	3.18105	0.001467	0/+
MXRA5Y	THAP9-AS1	0.018573	0.678052	0.448818	0.00041	3.17647	0.001491	0/+
C1QTNF7	THAP9-AS1	0.038296	0.391879	0.463753	0.000246	3.17047	0.001522	0/+
RBMS2	THAP9-AS1	0.297373	1.04e-11	0.646825	4.12e-08	3.1665	0.001543	#ERROR!
CFAP74	THAP9-AS1	0.286276	6.34e-11	-0.16693	0.210412	-3.16531	0.001549	#ERROR!
SESTD1	THAP9-AS1	0.140209	0.001637	0.539867	1.22e-05	3.16406	0.001556	#ERROR!
ITGB6	THAP9-AS1	0.007411	0.868447	0.438391	0.000577	3.16404	0.001556	0/+
CHML	THAP9-AS1	0.192889	1.35e-05	0.576953	2.13e-06	3.16213	0.001566	#ERROR!
LRCH2	THAP9-AS1	0.045454	0.30944	0.467861	0.000213	3.15732	0.001592	0/+
PSD2	THAP9-AS1	0.054008	0.227069	0.474406	0.000168	3.1562	0.001598	0/+
ENDOD1	THAP9-AS1	-0.03967	0.375073	0.398548	0.001944	3.15576	0.001601	0/+
CDH11	THAP9-AS1	-0.13517	0.002407	0.314183	0.016313	3.15278	0.001617	-/+
RHOBTB3	THAP9-AS1	0.1569	0.000418	0.550572	7.54e-06	3.15152	0.001624	#ERROR!
BPGM	THAP9-AS1	0.13636	0.0022	0.535493	1.48e-05	3.14882	0.001639	#ERROR!
EHF	THAP9-AS1	-0.07144	0.109883	0.370401	0.004209	3.1478	0.001645	0/+
RAI2	THAP9-AS1	0.141106	0.001527	0.53876	1.28e-05	3.14713	0.001649	#ERROR!
PERP	THAP9-AS1	0.030984	0.488532	0.454965	0.000333	3.14437	0.001664	0/+
SGMS1	THAP9-AS1	0.074506	0.095416	0.488741	9.92e-05	3.14308	0.001672	0/+
RPL26P2	THAP9-AS1	0.062348	0.163075	0.479361	0.000141	3.14284	0.001673	0/+
P4HA3	THAP9-AS1	0.108504	0.015007	0.513736	3.72e-05	3.13692	0.001707	#ERROR!
PROS1	THAP9-AS1	-0.03022	0.499278	0.404024	0.00166	3.1357	0.001714	0/+
AK4	THAP9-AS1	0.031939	0.475223	0.454456	0.000339	3.13345	0.001728	0/+
TGM1	THAP9-AS1	-0.000367	0.99345	0.428145	0.0008	3.13098	0.001742	0/+
REXO2	THAP9-AS1	0.156893	0.000418	0.548443	8.31e-06	3.13071	0.001744	#ERROR!
CD47	THAP9-AS1	0.139158	0.001776	0.53556	1.48e-05	3.12997	0.001748	#ERROR!
FMO2	THAP9-AS1	0.007858	0.860591	0.434638	0.000652	3.12929	0.001752	0/+
SSC5D	THAP9-AS1	-0.0228	0.610292	0.409352	0.001419	3.12856	0.001757	0/+
SNORA79B	THAP9-AS1	0.14749	0.000918	0.541131	1.16e-05	3.12544	0.001775	#ERROR!
SLC43A3	THAP9-AS1	-0.00616	0.890476	0.42205	0.000967	3.11973	0.00181	0/+
MFSD4A	THAP9-AS1	0.121088	0.006602	0.520904	2.76e-05	3.11665	0.001829	#ERROR!
RN7SKP151	THAP9-AS1	0.036868	0.409787	0.456003	0.000322	3.11306	0.001852	0/+
CCDC185	THAP9-AS1	-0.03086	0.490245	0.400664	0.001829	3.11267	0.001854	0/+
MINAR1	THAP9-AS1	0.090079	0.043662	0.497231	7.17e-05	3.11256	0.001855	#ERROR!
ARHGEF39	THAP9-AS1	0.373556	0	-0.06266	0.64031	-3.11252	0.001855	#ERROR!
TEX26-AS1	THAP9-AS1	-0.07049	0.114701	0.366566	0.004653	3.11094	0.001865	0/+
AHNAK2	THAP9-AS1	-0.09088	0.041808	0.348658	0.007313	3.11088	0.001865	-/+
ARHGAP44	THAP9-AS1	0.147609	0.000909	0.539652	1.23e-05	3.11032	0.001869	#ERROR!
MMP24	THAP9-AS1	0.059692	0.181784	0.473065	0.000177	3.1054	0.0019	0/+
RNF152	THAP9-AS1	0.191826	1.51e-05	0.570506	2.93e-06	3.10398	0.001909	#ERROR!
ITGA2	THAP9-AS1	-0.0254	0.57015	0.404159	0.001653	3.10383	0.00191	0/+
AHNAK	THAP9-AS1	0.013079	0.770046	0.435708	0.00063	3.10262	0.001918	0/+
PRRX1	THAP9-AS1	-0.0462	0.30151	0.38612	0.002757	3.10008	0.001935	0/+
PCSK6-AS1	THAP9-AS1	-0.04022	0.36854	0.390198	0.002462	3.09189	0.001989	0/+
KRT80	THAP9-AS1	-0.08335	0.062042	0.352847	0.006594	3.09161	0.001991	0/+
SOX21-AS1	THAP9-AS1	0.136957	0.002102	0.529587	1.91e-05	3.0883	0.002013	#ERROR!
LOC728975	THAP9-AS1	0.155065	0.000489	0.542346	1.09e-05	3.0842	0.002041	#ERROR!
ROR1	THAP9-AS1	-0.12039	0.006926	0.318632	0.014781	3.08385	0.002043	-/+
MYRF	THAP9-AS1	0.070545	0.114427	0.478833	0.000143	3.08188	0.002057	0/+
ELANE	THAP9-AS1	-0.09879	0.026879	0.337798	0.009506	3.08125	0.002061	-/+
CDC42BPG	THAP9-AS1	0.074531	0.095306	0.481766	0.000129	3.08054	0.002066	0/+
ANO6	THAP9-AS1	0.064568	0.14858	0.473945	0.000171	3.07969	0.002072	0/+
LOC645405	THAP9-AS1	0.0621	0.164757	0.471859	0.000185	3.07826	0.002082	0/+
PKP1	THAP9-AS1	-0.05042	0.259498	0.379611	0.003293	3.07682	0.002092	0/+
CCL24	THAP9-AS1	-0.08849	0.047517	0.345926	0.007819	3.07316	0.002118	-/+
KLK13	THAP9-AS1	0.128711	0.003869	0.521884	2.65e-05	3.07291	0.00212	#ERROR!
KLK7	THAP9-AS1	-0.08452	0.05844	0.349272	0.007204	3.07182	0.002128	0/+
PMP22	THAP9-AS1	0.042346	0.343726	0.454996	0.000333	3.06686	0.002163	0/+
LOC101927666	THAP9-AS1	0.061571	0.168392	0.470095	0.000197	3.06639	0.002167	0/+
MYH10	THAP9-AS1	-0.00154	0.972585	0.418912	0.001065	3.06206	0.002198	0/+
SLC6A6	THAP9-AS1	0.012784	0.775079	0.430571	0.000741	3.0614	0.002203	0/+
EPDR1	THAP9-AS1	0.176545	6.98e-05	0.555195	6.09e-06	3.05889	0.002222	#ERROR!
COL8A1	THAP9-AS1	-0.01859	0.677706	0.404085	0.001657	3.05665	0.002238	0/+
TENT5A	THAP9-AS1	0.075604	0.090619	0.479113	0.000142	3.04958	0.002292	0/+
SLC7A9	THAP9-AS1	0.353848	4.44e-16	-0.07603	0.570539	-3.04911	0.002295	#ERROR!
PDLIM1	THAP9-AS1	0.000813	0.985509	0.41922	0.001055	3.04855	0.0023	0/+
MIR4748	THAP9-AS1	-0.04773	0.285846	0.378157	0.003425	3.04676	0.002313	0/+
STON2	THAP9-AS1	0.223433	4.24e-07	0.586588	1.31e-06	3.04341	0.002339	#ERROR!
GRID1	THAP9-AS1	0.19941	6.73e-06	0.56946	3.09e-06	3.03947	0.00237	#ERROR!
POF1B	THAP9-AS1	0.082439	0.064949	0.483193	0.000122	3.03886	0.002375	0/+
LMO7	THAP9-AS1	0.164044	0.000223	0.544051	1.01e-05	3.03774	0.002384	#ERROR!
ME3	THAP9-AS1	0.137981	0.001944	0.524726	2.35e-05	3.03514	0.002404	#ERROR!
CCDC74A	THAP9-AS1	0.146066	0.00103	0.530563	1.84e-05	3.03404	0.002413	#ERROR!
MYZAP	THAP9-AS1	0.028041	0.530781	0.439522	0.000557	3.03254	0.002425	0/+
SERPINA4	THAP9-AS1	-0.15203	0.000631	0.282229	0.031837	3.03072	0.00244	-/+
NAMPTP1	THAP9-AS1	-0.0213	0.633977	0.398622	0.00194	3.03065	0.00244	0/+
SCEL	THAP9-AS1	-0.01961	0.661175	0.400031	0.001863	3.03053	0.002441	0/+
GLCE	THAP9-AS1	0.146378	0.001005	0.53037	1.85e-05	3.03002	0.002445	#ERROR!
CNN3	THAP9-AS1	0.059351	0.184302	0.46417	0.000242	3.02982	0.002447	0/+
TCEAL2	THAP9-AS1	0.117346	0.008495	0.508459	4.6e-05	3.02686	0.002471	#ERROR!
FKBP7	THAP9-AS1	0.286198	6.42e-11	0.626936	1.4e-07	3.0212	0.002518	#ERROR!
SERINC5	THAP9-AS1	0.022585	0.613675	0.433555	0.000674	3.01945	0.002532	0/+
NELL2	THAP9-AS1	-0.01677	0.707811	0.40104	0.00181	3.01932	0.002533	0/+
LOC441179	THAP9-AS1	0.148097	0.000874	0.530284	1.86e-05	3.0172	0.002551	#ERROR!
ADH1C	THAP9-AS1	-0.00934	0.834674	0.406769	0.001531	3.01532	0.002567	0/+
SCRN1	THAP9-AS1	0.086959	0.051513	0.483688	0.00012	3.01215	0.002594	0/+
CHSY3	THAP9-AS1	0.05359	0.230699	0.457361	0.000307	3.01023	0.00261	0/+
BNIP3P32	THAP9-AS1	0.267141	1.19e-09	0.613099	3.12e-07	3.0086	0.002625	#ERROR!
CAST	THAP9-AS1	0.107968	0.015516	0.499323	6.61e-05	3.00808	0.002629	#ERROR!
SC5D	THAP9-AS1	0.318096	2.88e-13	0.646558	4.19e-08	3.00686	0.00264	#ERROR!
CTHRC1	THAP9-AS1	-0.10739	0.016085	0.319956	0.014349	3.00389	0.002666	-/+
SEC14L2	THAP9-AS1	0.033786	0.450054	0.440613	0.000537	3.00246	0.002678	0/+
ST14	THAP9-AS1	-0.02284	0.609652	0.39378	0.002226	3.00192	0.002683	0/+
FGFBP1	THAP9-AS1	-0.06573	0.141402	0.356706	0.005987	3.00067	0.002694	0/+
ANGPTL2	THAP9-AS1	0.090371	0.042981	0.484873	0.000115	2.99922	0.002707	#ERROR!
BICC1	THAP9-AS1	-0.01379	0.757969	0.400615	0.001832	2.99548	0.00274	0/+
CIBAR1	THAP9-AS1	0.394979	0	0.694086	1.53e-09	2.99508	0.002744	#ERROR!
KIAA1755	THAP9-AS1	-0.13808	0.001929	0.290489	0.026961	2.99482	0.002746	-/+
IGSF10	THAP9-AS1	0.097934	0.028232	0.490133	9.41e-05	2.99423	0.002751	#ERROR!
B4GALT5	THAP9-AS1	-0.02381	0.594544	0.391793	0.002354	2.99249	0.002767	0/+
ABCA9	THAP9-AS1	0.135844	0.002287	0.518034	3.11e-05	2.98721	0.002815	#ERROR!
RIMS1	THAP9-AS1	0.181308	4.39e-05	0.550977	7.4e-06	2.98372	0.002848	#ERROR!
FRMD6	THAP9-AS1	0.044681	0.317743	0.447028	0.000435	2.98249	0.002859	0/+
FBLN1	THAP9-AS1	-0.0837	0.060927	0.338286	0.009396	2.98103	0.002873	0/+
HSPA12A	THAP9-AS1	0.259202	3.77e-09	0.604897	4.93e-07	2.97779	0.002903	#ERROR!
PHETA2	THAP9-AS1	0.075994	0.088962	0.471198	0.000189	2.97701	0.002911	0/+
RNU6-606P	THAP9-AS1	0.107473	0.015998	0.495513	7.66e-05	2.97689	0.002912	#ERROR!
GALNT5	THAP9-AS1	-0.07815	0.080232	0.342652	0.008464	2.97659	0.002915	0/+
GSN	THAP9-AS1	-0.09419	0.034869	0.328073	0.011932	2.97478	0.002932	-/+
MITF	THAP9-AS1	0.202593	4.75e-06	0.56514	3.8e-06	2.97325	0.002947	#ERROR!
LOC100420048	THAP9-AS1	0.282598	1.13e-10	-0.14286	0.284696	-2.96937	0.002984	#ERROR!
COL5A1	THAP9-AS1	-0.03234	0.469687	0.381568	0.003123	2.96865	0.002991	0/+
NXN	THAP9-AS1	-0.02153	0.63027	0.39055	0.002438	2.96688	0.003008	0/+
IDS	THAP9-AS1	0.100755	0.023973	0.488979	9.83e-05	2.96438	0.003033	#ERROR!
KANK2	THAP9-AS1	0.088967	0.046336	0.479851	0.000138	2.96416	0.003035	#ERROR!
PLEKHA5	THAP9-AS1	0.247511	1.92e-08	0.595392	8.23e-07	2.96163	0.00306	#ERROR!
PKM	THAP9-AS1	-0.03112	0.486668	0.381721	0.00311	2.9615	0.003061	0/+
GALNT3	THAP9-AS1	0.165362	0.000198	0.537093	1.38e-05	2.96127	0.003064	#ERROR!
KHDRBS3	THAP9-AS1	-0.00367	0.934649	0.404551	0.001634	2.95841	0.003092	0/+
GLS	THAP9-AS1	0.14236	0.001384	0.519657	2.91e-05	2.95696	0.003107	#ERROR!
MYO1D	THAP9-AS1	0.027896	0.532907	0.430325	0.000747	2.95598	0.003117	0/+
C7	THAP9-AS1	-0.08408	0.059786	0.334656	0.010238	2.9556	0.003121	0/+
CYP11A1	THAP9-AS1	-0.11456	0.010204	0.307013	0.01907	2.95542	0.003122	-/+
ELK3	THAP9-AS1	0.10197	0.022317	0.488649	9.95e-05	2.95302	0.003147	#ERROR!
MYOF	THAP9-AS1	0.126257	0.004609	0.506714	4.93e-05	2.94895	0.003189	#ERROR!
RNU4-39P	THAP9-AS1	0.330514	2.93e-14	0.649565	3.46e-08	2.94743	0.003204	#ERROR!
FAM83A	THAP9-AS1	-0.10721	0.016256	0.312556	0.016907	2.94649	0.003214	-/+
DCN	THAP9-AS1	-0.08488	0.057372	0.332626	0.010737	2.94553	0.003224	0/+
TLCD5	THAP9-AS1	0.297834	9.65e-12	0.627557	1.35e-07	2.94123	0.003269	#ERROR!
ABCA6	THAP9-AS1	0.058085	0.193853	0.452901	0.000357	2.94095	0.003272	0/+
ANKRD18DP	THAP9-AS1	0.319136	2.39e-13	-0.0988	0.460608	-2.9383	0.0033	#ERROR!
RN7SKP58	THAP9-AS1	0.048841	0.274733	-0.3635	0.005036	-2.9382	0.003301	0/-
RGS4	THAP9-AS1	-0.1005	0.024336	0.317464	0.01517	2.93732	0.003311	-/+
LTBP2	THAP9-AS1	-0.01071	0.810792	0.395872	0.002098	2.93591	0.003326	0/+
PIANP	THAP9-AS1	0.029032	0.51634	0.428042	0.000803	2.92907	0.0034	0/+
PGM2L1	THAP9-AS1	0.013901	0.756029	0.415511	0.00118	2.92836	0.003408	0/+
TMCC3	THAP9-AS1	0.007809	0.861448	0.410361	0.001377	2.92756	0.003416	0/+
TAGLN3	THAP9-AS1	-0.06414	0.151287	0.348635	0.007317	2.92676	0.003425	0/+
TFPI	THAP9-AS1	0.143499	0.001265	0.517242	3.22e-05	2.92644	0.003429	#ERROR!
SLC22A4	THAP9-AS1	0.105361	0.018209	0.48813	0.000101	2.92492	0.003445	#ERROR!
PSG1	THAP9-AS1	-0.15356	0.000556	0.266294	0.043328	2.92359	0.00346	-/+
OMD	THAP9-AS1	-0.08181	0.067033	0.332169	0.010852	2.92087	0.003491	0/+
PLA2G4A	THAP9-AS1	-0.04487	0.315673	0.364057	0.004964	2.91541	0.003552	0/+
CLU	THAP9-AS1	-0.06827	0.12663	0.343392	0.008314	2.91438	0.003564	0/+
MIR4254	THAP9-AS1	0.011002	0.805759	0.411398	0.001335	2.91427	0.003565	0/+
ABCA12	THAP9-AS1	0.047876	0.284341	0.44149	0.000522	2.91343	0.003575	0/+
SNORA59B	THAP9-AS1	0.245837	2.4e-08	0.589501	1.12e-06	2.91177	0.003594	#ERROR!
ALDH1L2	THAP9-AS1	0.063082	0.158166	0.453441	0.000351	2.9113	0.003599	0/+
LAMP2	THAP9-AS1	0.145523	0.001076	0.516611	3.3e-05	2.90642	0.003656	#ERROR!
LOC105371414	THAP9-AS1	0.127336	0.004269	0.502734	5.78e-05	2.90494	0.003673	#ERROR!
MFAP4	THAP9-AS1	-0.01826	0.683189	0.385105	0.002835	2.90067	0.003724	0/+
GAPDHP49	THAP9-AS1	0.078556	0.078678	0.464402	0.00024	2.89991	0.003733	0/+
GTF2IRD1	THAP9-AS1	0.195548	1.02e-05	0.552695	6.84e-06	2.89966	0.003736	#ERROR!
GLI2	THAP9-AS1	0.03234	0.469701	0.426941	0.000831	2.89723	0.003765	0/+
CCDC148	THAP9-AS1	0.164874	0.000207	0.529795	1.9e-05	2.89497	0.003792	#ERROR!
CLEC16A	THAP9-AS1	0.153243	0.00057	0.521026	2.75e-05	2.89374	0.003807	#ERROR!
PDLIM5	THAP9-AS1	0.202893	4.6e-06	0.557155	5.56e-06	2.89143	0.003835	#ERROR!
GRB7	THAP9-AS1	-0.02493	0.577345	0.378036	0.003436	2.88973	0.003856	0/+
ABALON	THAP9-AS1	-0.06176	0.167079	0.345828	0.007837	2.88861	0.003869	0/+
RAB31	THAP9-AS1	0.0205	0.646802	0.415919	0.001166	2.88661	0.003894	0/+
CHPT1	THAP9-AS1	0.183518	3.52e-05	0.542451	1.09e-05	2.88495	0.003915	#ERROR!
CLIC5	THAP9-AS1	0.009923	0.824493	0.406921	0.001525	2.88489	0.003915	0/+
MAPK13	THAP9-AS1	0.084464	0.058611	0.467147	0.000218	2.88322	0.003936	0/+
MORF4L1	THAP9-AS1	0.294072	1.8e-11	0.619755	2.13e-07	2.88213	0.00395	#ERROR!
BMPR1B	THAP9-AS1	-0.06488	0.146612	0.341384	0.008726	2.87558	0.004033	0/+
LOC101928731	THAP9-AS1	0.036236	0.417867	0.427439	0.000818	2.87473	0.004044	0/+
SLC22A25	THAP9-AS1	0.088868	0.046581	-0.31973	0.014423	-2.8743	0.004049	#ERROR!
NREP	THAP9-AS1	0.293978	1.83e-11	0.618873	2.24e-07	2.87304	0.004065	#ERROR!
LOC112268408	THAP9-AS1	0.10106	0.023547	0.478966	0.000143	2.87288	0.004068	#ERROR!
OR2A1	THAP9-AS1	0.252969	9.06e-09	0.590626	1.06e-06	2.87157	0.004084	#ERROR!
TMEM43	THAP9-AS1	0.114807	0.010041	0.489418	9.67e-05	2.87112	0.00409	#ERROR!
DDR2	THAP9-AS1	0.057433	0.198913	0.444137	0.000479	2.87042	0.004099	0/+
ARHGEF26	THAP9-AS1	0.216046	1.03e-06	0.564424	3.94e-06	2.86987	0.004106	#ERROR!
NACAD	THAP9-AS1	-0.12342	0.005625	0.287413	0.028698	2.86985	0.004107	-/+
PID1	THAP9-AS1	0.016087	0.719172	0.410195	0.001384	2.8696	0.00411	0/+
AIRE	THAP9-AS1	0.176154	7.25e-05	-0.237	0.073246	-2.86859	0.004123	#ERROR!
ABLIM3	THAP9-AS1	0.058342	0.191887	0.444573	0.000472	2.8679	0.004132	0/+
RNU4ATAC14P	THAP9-AS1	0.078051	0.080625	-0.32843	0.011835	-2.86631	0.004153	0/-
LOC100420880	THAP9-AS1	0.115474	0.009613	0.488866	9.87e-05	2.86154	0.004216	#ERROR!
CNGA1	THAP9-AS1	0.031559	0.480491	0.421994	0.000969	2.86132	0.004219	0/+
DNAJC6	THAP9-AS1	0.168267	0.000152	0.528686	1.99e-05	2.86058	0.004229	#ERROR!
ANKRD13B	THAP9-AS1	0.151109	0.000682	0.51586	3.41e-05	2.86037	0.004231	#ERROR!
GMFB	THAP9-AS1	0.257734	4.64e-09	0.592562	9.57e-07	2.85708	0.004276	#ERROR!
SLC22A11	THAP9-AS1	0.024882	0.578086	0.415833	0.001169	2.85592	0.004291	0/+
HTR2A	THAP9-AS1	-0.08519	0.056476	0.320624	0.014135	2.85579	0.004293	0/+
OLFML2B	THAP9-AS1	-0.04428	0.322158	0.356862	0.005963	2.85479	0.004307	0/+
ECT2L	THAP9-AS1	0.206159	3.2e-06	0.555759	5.93e-06	2.85431	0.004313	#ERROR!
MEG3	THAP9-AS1	0.020382	0.648697	0.411894	0.001316	2.85421	0.004314	0/+
ND4	THAP9-AS1	0.142741	0.001343	0.508829	4.53e-05	2.85366	0.004322	#ERROR!
IGFBP6	THAP9-AS1	-0.10694	0.016533	0.300357	0.021973	2.85255	0.004337	-/+
TMEM252	THAP9-AS1	0.082657	0.064239	0.462163	0.00026	2.8522	0.004342	0/+
SV2B	THAP9-AS1	-0.00199	0.964549	0.392841	0.002286	2.85174	0.004348	0/+
CCN5	THAP9-AS1	-0.12742	0.004243	0.280797	0.032753	2.84847	0.004393	-/+
GJC2	THAP9-AS1	0.033813	0.449699	0.421957	0.00097	2.84559	0.004433	0/+
FAM110B	THAP9-AS1	0.039879	0.372596	0.426917	0.000832	2.84543	0.004435	0/+
SULF2	THAP9-AS1	-0.01294	0.772388	0.382706	0.003028	2.84507	0.00444	0/+
PTX3	THAP9-AS1	0.231927	1.48e-07	0.573239	2.56e-06	2.84466	0.004446	#ERROR!
LOC100419073	THAP9-AS1	0.105674	0.017865	0.479151	0.000142	2.84263	0.004474	#ERROR!
PPIAL4E	THAP9-AS1	0.015277	0.73276	-0.38036	0.003227	-2.84226	0.004479	0/-
INF2	THAP9-AS1	-0.01923	0.667273	0.376965	0.003536	2.84223	0.00448	0/+
SLC66A3	THAP9-AS1	0.181225	4.42e-05	0.536153	1.44e-05	2.84045	0.004505	#ERROR!
SHF	THAP9-AS1	0.034252	0.443836	0.421525	0.000983	2.83899	0.004526	0/+
PARP4P2	THAP9-AS1	0.018824	0.673944	0.408593	0.001451	2.83773	0.004544	0/+
GBA3	THAP9-AS1	0.073871	0.098284	0.453481	0.00035	2.83755	0.004546	0/+
MARVELD1	THAP9-AS1	-0.03528	0.430283	0.362353	0.005187	2.8363	0.004564	0/+
PHLDB2	THAP9-AS1	0.008788	0.844292	0.399957	0.001867	2.83578	0.004571	0/+
LINC00692	THAP9-AS1	0.042017	0.347487	-0.35589	0.006111	-2.83172	0.00463	0/-
DERA	THAP9-AS1	0.310159	1.18e-12	0.625733	1.5e-07	2.82785	0.004686	#ERROR!
SPOCK1	THAP9-AS1	0.089633	0.044717	0.464638	0.000238	2.82571	0.004718	#ERROR!
STEAP1	THAP9-AS1	-0.07241	0.105155	0.328087	0.011928	2.82488	0.00473	0/+
PSMA6	THAP9-AS1	0.281053	1.45e-10	0.605645	4.73e-07	2.82471	0.004732	#ERROR!
LRRTM2	THAP9-AS1	0.267049	1.21e-09	0.595969	7.99e-07	2.8247	0.004733	#ERROR!
ITGB8	THAP9-AS1	-0.03676	0.411202	0.359369	0.005597	2.82296	0.004758	0/+
SGMS2	THAP9-AS1	-0.00831	0.852615	0.383742	0.002943	2.82172	0.004777	0/+
COBL	THAP9-AS1	0.069836	0.118121	0.44832	0.000417	2.82099	0.004788	0/+
SEPTIN2	THAP9-AS1	0.393247	0	0.679494	4.51e-09	2.82026	0.004799	#ERROR!
LIF	THAP9-AS1	-0.01769	0.69263	0.374923	0.003735	2.81539	0.004872	0/+
HSPE1P26	THAP9-AS1	0.129444	0.00367	0.494439	7.98e-05	2.81482	0.00488	#ERROR!
PPIP5K1P1	THAP9-AS1	0.085168	0.056531	0.459785	0.000282	2.81428	0.004889	0/+
FEM1AP2	THAP9-AS1	0.164899	0.000207	0.521217	2.73e-05	2.81378	0.004896	#ERROR!
PPFIBP1	THAP9-AS1	0.250003	1.36e-08	0.58285	1.58e-06	2.81215	0.004921	#ERROR!
RASAL1	THAP9-AS1	0.115919	0.009336	0.483642	0.00012	2.81169	0.004928	#ERROR!
ADD3-AS1	THAP9-AS1	0.358501	0	0.656374	2.22e-08	2.81146	0.004932	#ERROR!
LIMA1	THAP9-AS1	0.126254	0.00461	0.491479	8.94e-05	2.81026	0.00495	#ERROR!
NTN1	THAP9-AS1	0.117594	0.008357	0.484711	0.000115	2.80963	0.00496	#ERROR!
MIR99AHG	THAP9-AS1	0.322652	1.26e-13	0.632489	1e-07	2.80939	0.004964	#ERROR!
HAND2-AS1	THAP9-AS1	0.028455	0.524716	0.413072	0.00127	2.80869	0.004974	0/+
CCDC80	THAP9-AS1	-0.03434	0.442662	0.359604	0.005564	2.80826	0.004981	0/+
CD59	THAP9-AS1	0.088195	0.048273	0.461425	0.000267	2.80766	0.00499	#ERROR!
SGIP1	THAP9-AS1	0.259977	3.37e-09	0.589387	1.13e-06	2.80729	0.004996	#ERROR!
MMRN1	THAP9-AS1	0.180803	4.61e-05	0.532269	1.71e-05	2.80627	0.005012	#ERROR!
STK24	THAP9-AS1	0.180866	4.58e-05	0.531961	1.73e-05	2.80289	0.005065	#ERROR!
PLIN3	THAP9-AS1	0.144208	0.001196	0.504399	5.41e-05	2.80268	0.005068	#ERROR!
LRP1	THAP9-AS1	-0.02494	0.577238	0.367048	0.004595	2.80256	0.00507	0/+
AGMO	THAP9-AS1	0.157683	0.000391	0.514383	3.62e-05	2.80059	0.005101	#ERROR!
PITPNM3	THAP9-AS1	0.194192	1.18e-05	0.541405	1.14e-05	2.79915	0.005124	#ERROR!
ND2	THAP9-AS1	0.120584	0.006833	0.48585	0.000111	2.79907	0.005125	#ERROR!
OR4D6	THAP9-AS1	-0.05839	0.191487	0.337238	0.009633	2.79903	0.005126	0/+
RASA1	THAP9-AS1	0.11299	0.011297	0.479858	0.000138	2.79829	0.005137	#ERROR!
CFH	THAP9-AS1	-0.06646	0.137004	0.329796	0.011467	2.79715	0.005156	0/+
GABRG3-AS1	THAP9-AS1	0.071252	0.110828	-0.32547	0.012665	-2.79695	0.005159	0/-
CADPS	THAP9-AS1	-0.0355	0.427393	0.35701	0.005941	2.79586	0.005176	0/+
SGCE	THAP9-AS1	0.104825	0.01881	0.473084	0.000177	2.79486	0.005192	#ERROR!
ACKR2	THAP9-AS1	0.122342	0.006059	0.486633	0.000107	2.79389	0.005208	#ERROR!
SEMA3C	THAP9-AS1	-0.06944	0.120221	0.326468	0.01238	2.79212	0.005236	0/+
FAM78B	THAP9-AS1	0.097302	0.02927	0.466692	0.000222	2.79075	0.005259	#ERROR!
CLCN3P1	THAP9-AS1	0.152093	0.000628	0.509053	4.49e-05	2.79038	0.005265	#ERROR!
SLC9A7P1	THAP9-AS1	0.033105	0.459253	0.414658	0.001211	2.78995	0.005272	0/+
SLC1A7	THAP9-AS1	-0.06012	0.178632	0.334226	0.010342	2.78769	0.005309	0/+
SHC1	THAP9-AS1	0.269751	8.1e-10	0.59434	8.71e-07	2.78755	0.005311	#ERROR!
MEAF6	THAP9-AS1	0.312612	7.66e-13	0.623696	1.69e-07	2.78646	0.005329	#ERROR!
TMEM241	THAP9-AS1	0.255395	6.46e-09	0.584106	1.48e-06	2.78579	0.00534	#ERROR!
CWH43	THAP9-AS1	0.170726	0.000121	0.522302	2.61e-05	2.78298	0.005386	#ERROR!
CHCHD3	THAP9-AS1	0.234512	1.06e-07	0.568946	3.16e-06	2.78241	0.005396	#ERROR!
SIRPA	THAP9-AS1	-0.04433	0.321615	0.347525	0.007519	2.78226	0.005398	0/+
IGSF9	THAP9-AS1	0.049829	0.26513	0.427418	0.000819	2.78145	0.005412	0/+
ANXA11	THAP9-AS1	0.102247	0.021953	0.469454	0.000201	2.78078	0.005423	#ERROR!
DPY19L1	THAP9-AS1	0.04513	0.3129	0.423395	0.000928	2.78007	0.005435	0/+
CPXM2	THAP9-AS1	-0.09671	0.030268	0.300054	0.022114	2.77962	0.005442	-/+
RNU6-527P	THAP9-AS1	0.000162	0.997109	0.385539	0.002801	2.7782	0.005466	0/+
BAIAP2	THAP9-AS1	0.035756	0.424068	0.415372	0.001185	2.77771	0.005474	0/+
TEAD1	THAP9-AS1	0.09651	0.030618	0.464563	0.000239	2.77762	0.005476	#ERROR!
CKS2	THAP9-AS1	0.193135	1.32e-05	-0.20709	0.118805	-2.77367	0.005543	#ERROR!
CCN3	THAP9-AS1	0.104	0.01977	0.470007	0.000197	2.77352	0.005545	#ERROR!
KLHL4	THAP9-AS1	0.170004	0.00013	0.520396	2.82e-05	2.77016	0.005603	#ERROR!
ABCC4	THAP9-AS1	0.108735	0.014793	0.47333	0.000175	2.76999	0.005606	#ERROR!
TM4SF1	THAP9-AS1	-0.02887	0.51868	0.359456	0.005585	2.76967	0.005611	0/+
PPFIA2	THAP9-AS1	0.106108	0.017399	0.471178	0.000189	2.76923	0.005619	#ERROR!
RPS10P1	THAP9-AS1	0.257382	4.88e-09	-0.14077	0.291898	-2.76879	0.005626	#ERROR!
RPL21P128	THAP9-AS1	0.046323	0.300267	-0.34375	0.008243	-2.76662	0.005664	0/-
MSC-AS1	THAP9-AS1	-0.00406	0.92767	0.38047	0.003217	2.76647	0.005667	0/+
SLC18A3	THAP9-AS1	-0.16278	0.00025	0.235591	0.075027	2.76425	0.005705	-/0
ADGRG2	THAP9-AS1	-0.00827	0.853303	0.376546	0.003576	2.76395	0.005711	0/+
PON2	THAP9-AS1	0.186251	2.68e-05	0.531592	1.76e-05	2.76128	0.005758	#ERROR!
RNU6-1254P	THAP9-AS1	0.066606	0.136157	0.438663	0.000572	2.76099	0.005763	0/+
SNAP25	THAP9-AS1	0.064923	0.146352	0.437154	0.000601	2.75978	0.005784	0/+
ABHD12B	THAP9-AS1	0.02976	0.505872	0.408161	0.00147	2.75938	0.005791	0/+
KIRREL1	THAP9-AS1	0.064106	0.151513	0.436385	0.000616	2.75889	0.0058	0/+
DLGAP4	THAP9-AS1	0.148578	0.00084	0.502861	5.75e-05	2.75807	0.005814	#ERROR!
MAP4	THAP9-AS1	0.04907	0.272492	0.423742	0.000918	2.75597	0.005852	0/+
CALD1	THAP9-AS1	0.112823	0.011418	0.474683	0.000167	2.75363	0.005894	#ERROR!
KBTBD11	THAP9-AS1	0.25794	4.51e-09	0.582789	1.59e-06	2.75351	0.005896	#ERROR!
FZD10	THAP9-AS1	0.067216	0.132597	0.437842	0.000588	2.74986	0.005962	0/+
MAGEA12	THAP9-AS1	0.11664	0.008902	-0.27745	0.034977	-2.74886	0.00598	#ERROR!
DIO3OS	THAP9-AS1	-0.06749	0.131024	0.322447	0.013566	2.74799	0.005996	0/+
RNU7-12P	THAP9-AS1	0.058588	0.190014	-0.33042	0.011302	-2.7479	0.005998	0/-
SLX1B	THAP9-AS1	0.166784	0.000174	-0.22938	0.083269	-2.74745	0.006006	#ERROR!
H4C5	THAP9-AS1	0.368283	0	-0.01525	0.909565	-2.74603	0.006032	#ERROR!
TMEM200A	THAP9-AS1	-0.07992	0.073605	0.310814	0.017563	2.74505	0.00605	0/+
DNAJC19P4	THAP9-AS1	0.064176	0.151062	0.43472	0.00065	2.74436	0.006063	0/+
DLEU2	THAP9-AS1	0.484818	0	0.127215	0.341286	-2.7438	0.006073	#ERROR!
LINC01559	THAP9-AS1	-0.00338	0.939726	0.378067	0.003433	2.74264	0.006095	0/+
PROSER2	THAP9-AS1	0.075137	0.092637	0.44306	0.000496	2.73969	0.00615	0/+
TMEM100	THAP9-AS1	-0.10322	0.02072	0.288608	0.028012	2.73887	0.006165	-/+
SPINT1	THAP9-AS1	-0.02926	0.513035	0.35518	0.006221	2.73883	0.006166	0/+
IAPP	THAP9-AS1	0.054102	0.226261	-0.33303	0.010635	-2.7372	0.006196	0/-
CGREF1	THAP9-AS1	-0.09416	0.034933	0.296491	0.023826	2.73528	0.006233	-/+
RPL19P4	THAP9-AS1	0.039498	0.377179	-0.34555	0.007891	-2.73385	0.00626	0/-
RNA5SP465	THAP9-AS1	0.210722	1.91e-06	0.54659	9.04e-06	2.73166	0.006302	#ERROR!
EHBP1	THAP9-AS1	0.135847	0.002286	0.490041	9.44e-05	2.73058	0.006322	#ERROR!
LINC01676	THAP9-AS1	0.09208	0.039177	-0.29774	0.023214	-2.73028	0.006328	#ERROR!
IL25	THAP9-AS1	0.134112	0.002604	0.488496	0.0001	2.72878	0.006357	#ERROR!
RHBDL3	THAP9-AS1	0.091822	0.039731	0.455165	0.000331	2.72848	0.006363	#ERROR!
CLSTN2	THAP9-AS1	0.008534	0.848731	0.386471	0.00273	2.72845	0.006363	0/+
FGF7	THAP9-AS1	0.013781	0.758072	0.3909	0.002414	2.72825	0.006367	0/+
GTF2F2	THAP9-AS1	0.273854	4.37e-10	0.59158	1.01e-06	2.72817	0.006369	#ERROR!
PGR	THAP9-AS1	-0.09789	0.028298	0.291951	0.026167	2.72705	0.00639	-/+
TMEM35A	THAP9-AS1	0.076641	0.086269	0.442767	0.000501	2.72685	0.006394	0/+
CDH22	THAP9-AS1	-0.0926	0.038083	0.296643	0.02375	2.72564	0.006418	-/+
RNU6-61P	THAP9-AS1	0.10172	0.022649	-0.28808	0.028314	-2.72458	0.006438	#ERROR!
COL1A1	THAP9-AS1	-0.14462	0.001157	0.247631	0.060909	2.72448	0.00644	-/0
CAPN5	THAP9-AS1	0.080692	0.070862	0.445728	0.000454	2.72421	0.006446	0/+
B4GALNT2P1	THAP9-AS1	0.036539	0.413981	-0.34675	0.007662	-2.72295	0.00647	0/-
GAPDHS	THAP9-AS1	0.247329	1.96e-08	-0.14461	0.278789	-2.72221	0.006485	#ERROR!
PLAAT5	THAP9-AS1	-0.05816	0.193288	0.327435	0.012108	2.72207	0.006487	0/+
PLXDC2	THAP9-AS1	0.114324	0.010363	0.472253	0.000182	2.72182	0.006492	#ERROR!
ITGB4	THAP9-AS1	-0.07257	0.104352	0.314225	0.016299	2.72036	0.006521	0/+
ANXA4	THAP9-AS1	0.212248	1.6e-06	0.546505	9.08e-06	2.71991	0.00653	#ERROR!
PDP1	THAP9-AS1	0.129667	0.003611	0.483942	0.000119	2.71894	0.006549	#ERROR!
PMEPA1	THAP9-AS1	0.008339	0.852147	0.385096	0.002836	2.71874	0.006553	0/+
CARD6	THAP9-AS1	0.131338	0.003197	0.484965	0.000114	2.71645	0.006599	#ERROR!
FAM180A	THAP9-AS1	-0.02919	0.514026	0.352285	0.006687	2.71575	0.006613	0/+
ELOVL7	THAP9-AS1	0.095555	0.032315	0.456594	0.000315	2.71507	0.006626	#ERROR!
SLC7A1	THAP9-AS1	0.109114	0.014447	0.467331	0.000217	2.71471	0.006633	#ERROR!
TM7SF3	THAP9-AS1	0.154591	0.000509	0.502707	5.78e-05	2.71458	0.006636	#ERROR!
CA13	THAP9-AS1	0.288668	4.33e-11	0.600661	6.21e-07	2.7145	0.006638	#ERROR!
PODNL1	THAP9-AS1	-0.13308	0.002811	0.257116	0.051367	2.71332	0.006661	-/0
DUSP29	THAP9-AS1	-0.06615	0.138878	-0.43251	0.000697	-2.71218	0.006684	0/-
GPR1	THAP9-AS1	-0.01028	0.818271	0.368264	0.004451	2.71194	0.006689	0/+
OSGIN2	THAP9-AS1	0.142991	0.001317	0.493171	8.38e-05	2.709	0.006749	#ERROR!
LINC01500	THAP9-AS1	-0.04616	0.302003	0.336197	0.009873	2.70711	0.006787	0/+
RNF212B	THAP9-AS1	0.385158	0	0.665169	1.23e-08	2.70669	0.006796	#ERROR!
IQSEC3	THAP9-AS1	-0.03673	0.411583	0.344465	0.008101	2.70647	0.0068	0/+
CRPPA-AS1	THAP9-AS1	0.232021	1.46e-07	0.559509	4.98e-06	2.70578	0.006814	#ERROR!
SLC7A8	THAP9-AS1	0.149987	0.000748	0.498124	6.92e-05	2.705	0.00683	#ERROR!
LINC02432	THAP9-AS1	0.188055	2.23e-05	0.526741	2.16e-05	2.70243	0.006883	#ERROR!
RN7SL614P	THAP9-AS1	0.146851	0.000967	0.495366	7.7e-05	2.7019	0.006894	#ERROR!
NXPH4	THAP9-AS1	0.183913	3.39e-05	-0.20606	0.1207	-2.70092	0.006915	#ERROR!
GAD1	THAP9-AS1	0.178948	5.53e-05	0.519598	2.92e-05	2.69962	0.006942	#ERROR!
THOC7-AS1	THAP9-AS1	0.14154	0.001476	0.490959	9.12e-05	2.69917	0.006951	#ERROR!
RPRD1A	THAP9-AS1	0.314039	5.95e-13	0.61674	2.54e-07	2.69836	0.006968	#ERROR!
LACTB2	THAP9-AS1	0.253969	7.88e-09	0.574507	2.41e-06	2.69744	0.006987	#ERROR!
BCL2L1	THAP9-AS1	-0.05777	0.19626	0.324382	0.012984	2.69607	0.007016	0/+
ADAMTS16	THAP9-AS1	0.184167	3.3e-05	0.523127	2.52e-05	2.69585	0.007021	#ERROR!
AKT3	THAP9-AS1	0.171567	0.000112	0.513597	3.74e-05	2.69572	0.007024	#ERROR!
KLF8	THAP9-AS1	0.194922	1.09e-05	0.531143	1.79e-05	2.69548	0.007029	#ERROR!
F7	THAP9-AS1	0.032219	0.471361	0.402271	0.001746	2.69437	0.007052	0/+
NLRP10	THAP9-AS1	-0.10512	0.018477	0.280724	0.032801	2.69337	0.007073	-/+
COL3A1	THAP9-AS1	-0.06821	0.126942	0.314599	0.016165	2.69324	0.007076	0/+
PICART1	THAP9-AS1	0.107257	0.016214	0.463363	0.000249	2.69294	0.007083	#ERROR!
LINC01653	THAP9-AS1	0.067088	0.133333	-0.3154	0.01588	-2.69163	0.00711	0/-
ND1	THAP9-AS1	0.073686	0.099131	0.436139	0.000621	2.69101	0.007124	0/+
LOC107986114	THAP9-AS1	0.099438	0.025887	0.456737	0.000314	2.6895	0.007156	#ERROR!
RNA5SP118	THAP9-AS1	0.160716	0.0003	0.504645	5.36e-05	2.68939	0.007158	#ERROR!
AMPH	THAP9-AS1	0.043223	0.333808	0.410784	0.00136	2.68876	0.007172	0/+
CYP4F11	THAP9-AS1	0.111231	0.012642	0.465898	0.000228	2.68754	0.007198	#ERROR!
LINC02274	THAP9-AS1	0.085389	0.055889	0.44491	0.000467	2.6849	0.007255	0/+
FEZ2	THAP9-AS1	0.261494	2.71e-09	0.57862	1.96e-06	2.68446	0.007265	#ERROR!
AK3P3	THAP9-AS1	0.185172	2.98e-05	0.522479	2.59e-05	2.68266	0.007304	#ERROR!
FAM114A1	THAP9-AS1	0.103374	0.020528	0.459025	0.00029	2.68212	0.007316	#ERROR!
RNU6-453P	THAP9-AS1	0.154162	0.000528	-0.23249	0.079059	-2.68133	0.007333	#ERROR!
SULT4A1	THAP9-AS1	0.000975	0.982617	0.37379	0.003849	2.67879	0.007389	0/+
HACD1	THAP9-AS1	0.086016	0.054107	0.444427	0.000474	2.67647	0.00744	0/+
LEMD1	THAP9-AS1	-0.06823	0.126861	0.312355	0.016982	2.67632	0.007443	0/+
SLC2A13	THAP9-AS1	0.114627	0.01016	0.467212	0.000218	2.67551	0.007462	#ERROR!
NLN	THAP9-AS1	0.161362	0.000283	0.503507	5.61e-05	2.67443	0.007486	#ERROR!
RNU2-68P	THAP9-AS1	0.181681	4.23e-05	-0.20447	0.123645	-2.67382	0.007499	#ERROR!
CETP	THAP9-AS1	0.206739	3e-06	-0.17928	0.178107	-2.67305	0.007517	#ERROR!
HS3ST1	THAP9-AS1	-0.04203	0.347287	0.335369	0.010068	2.67249	0.007529	0/+
ADSS2	THAP9-AS1	0.255118	6.71e-09	0.572745	2.63e-06	2.67109	0.007561	#ERROR!
PDGFC	THAP9-AS1	0.180516	4.74e-05	0.517688	3.16e-05	2.67068	0.00757	#ERROR!
LINC01589	THAP9-AS1	-0.01902	0.67078	0.355256	0.006209	2.66936	0.0076	0/+
NALCN-AS1	THAP9-AS1	-0.04431	0.321784	0.332896	0.010669	2.66905	0.007607	0/+
PTN	THAP9-AS1	0.053785	0.229002	0.417141	0.001124	2.66883	0.007612	0/+
NIBAN1	THAP9-AS1	-0.06759	0.130457	0.311933	0.017139	2.66875	0.007613	0/+
LOC340357	THAP9-AS1	-0.04906	0.272596	0.328531	0.011807	2.66808	0.007629	0/+
LPAR3	THAP9-AS1	-0.0488	0.275113	0.328178	0.011903	2.66362	0.007731	0/+
LOC100996442	THAP9-AS1	0.142067	0.001416	0.487177	0.000105	2.66151	0.007779	#ERROR!
KAZALD1	THAP9-AS1	0.147515	0.000916	0.491394	8.97e-05	2.66136	0.007782	#ERROR!
BMP1	THAP9-AS1	0.187157	2.44e-05	0.521502	2.7e-05	2.65942	0.007828	#ERROR!
CRMP1	THAP9-AS1	0.287874	4.91e-11	0.594826	8.49e-07	2.65834	0.007853	#ERROR!
HLA-V	THAP9-AS1	0.142639	0.001354	0.487245	0.000105	2.65813	0.007858	#ERROR!
EXOC6B	THAP9-AS1	0.106414	0.017075	0.458626	0.000294	2.65763	0.007869	#ERROR!
POLR3C	THAP9-AS1	0.205936	3.28e-06	0.535384	1.49e-05	2.65755	0.007871	#ERROR!
LOC101926964	THAP9-AS1	0.150775	0.000701	0.49348	8.28e-05	2.6574	0.007875	#ERROR!
FUT2	THAP9-AS1	-0.03509	0.432819	0.33956	0.009115	2.65725	0.007878	0/+
ST8SIA5	THAP9-AS1	0.19764	8.15e-06	0.529088	1.96e-05	2.65661	0.007893	#ERROR!
NGEF	THAP9-AS1	-0.04245	0.342496	0.332897	0.010669	2.65635	0.007899	0/+
LAMC2	THAP9-AS1	0.014058	0.753367	0.382152	0.003074	2.65605	0.007906	0/+
ANKRD13A	THAP9-AS1	0.303898	3.47e-12	0.605829	4.68e-07	2.6559	0.00791	#ERROR!
LOC105373876	THAP9-AS1	0.131451	0.003171	0.477953	0.000148	2.65326	0.007972	#ERROR!
C15orf62	THAP9-AS1	0.134891	0.002457	0.480402	0.000135	2.65105	0.008024	#ERROR!
PRELID3BP4	THAP9-AS1	0.092586	0.038106	-0.2866	0.029175	-2.65049	0.008038	#ERROR!
KIFAP3	THAP9-AS1	0.227744	2.5e-07	0.550695	7.5e-06	2.64956	0.00806	#ERROR!
ELOBP1	THAP9-AS1	0.086873	0.051744	-0.2917	0.026301	-2.6492	0.008068	0/-
RPL7AP26	THAP9-AS1	0.190894	1.66e-05	-0.19184	0.149127	-2.64915	0.00807	#ERROR!
PRELP	THAP9-AS1	-0.03439	0.441938	0.338717	0.0093	2.64601	0.008145	0/+
PPP3CA	THAP9-AS1	0.238358	6.47e-08	0.557863	5.38e-06	2.64356	0.008204	#ERROR!
ND5	THAP9-AS1	0.195587	1.01e-05	0.526086	2.22e-05	2.64278	0.008223	#ERROR!
RPL19P18	THAP9-AS1	0.152765	0.000594	-0.22849	0.084497	-2.64272	0.008224	#ERROR!
MEGF10	THAP9-AS1	0.027056	0.545312	0.391516	0.002373	2.64243	0.008231	0/+
RAB11FIP4	THAP9-AS1	0.119039	0.007586	0.4669	0.00022	2.6422	0.008237	#ERROR!
INHBA	THAP9-AS1	-0.08357	0.061327	0.293655	0.025266	2.6411	0.008264	0/+
SEC23A	THAP9-AS1	0.086271	0.053395	0.440384	0.000541	2.64034	0.008282	0/+
SPATA31B1P	THAP9-AS1	0.031403	0.482664	0.394833	0.002161	2.6395	0.008303	0/+
DNAJC21	THAP9-AS1	0.168201	0.000153	0.504799	5.33e-05	2.63822	0.008334	#ERROR!
QSOX1	THAP9-AS1	-0.1	0.025054	0.278013	0.034597	2.63789	0.008342	-/+
GPR182	THAP9-AS1	0.153926	0.000539	0.493277	8.35e-05	2.63351	0.008451	#ERROR!
CLEC4F	THAP9-AS1	-0.00258	0.954004	0.364969	0.004849	2.63327	0.008457	0/+
RN7SL230P	THAP9-AS1	0.14386	0.001229	0.485362	0.000113	2.63274	0.00847	#ERROR!
DSG2	THAP9-AS1	0.127533	0.00421	0.472407	0.000181	2.63153	0.0085	#ERROR!
HIF1A	THAP9-AS1	0.092661	0.03795	0.444506	0.000473	2.63134	0.008505	#ERROR!
RPS11P4	THAP9-AS1	0.064837	0.146892	-0.30948	0.018079	-2.6313	0.008506	0/-
NYAP2	THAP9-AS1	-0.04608	0.302807	0.32613	0.012476	2.62929	0.008556	0/+
MGST1	THAP9-AS1	0.244544	2.86e-08	0.560917	4.65e-06	2.62904	0.008563	#ERROR!
HOXD1	THAP9-AS1	-0.08705	0.051261	0.288734	0.027941	2.62829	0.008582	0/+
LOC101927811	THAP9-AS1	0.085041	0.056902	0.437931	0.000586	2.62804	0.008588	0/+
CDK5RAP2	THAP9-AS1	0.041653	0.351683	0.402055	0.001757	2.62803	0.008588	0/+
HES1	THAP9-AS1	0.433789	0	0.080165	0.549712	-2.62664	0.008623	#ERROR!
PNPLA5	THAP9-AS1	-0.05459	0.222072	0.318071	0.014967	2.62616	0.008635	0/+
ARL8B	THAP9-AS1	0.289028	4.08e-11	0.592531	9.58e-07	2.62551	0.008652	#ERROR!
FAM133A	THAP9-AS1	0.110031	0.013639	0.457574	0.000305	2.62351	0.008703	#ERROR!
TMEM217	THAP9-AS1	0.126085	0.004666	0.470349	0.000195	2.62351	0.008703	#ERROR!
MAP7D2	THAP9-AS1	0.05984	0.180704	0.416598	0.001142	2.62281	0.008721	0/+
OLFM1	THAP9-AS1	0.013279	0.766628	0.377267	0.003508	2.62235	0.008733	0/+
EVPL	THAP9-AS1	0.074429	0.09576	0.428571	0.00079	2.62227	0.008735	0/+
ASPN	THAP9-AS1	0.010109	0.821256	0.374312	0.003796	2.6205	0.00878	0/+
CRLF1	THAP9-AS1	-0.09003	0.043779	0.284919	0.030174	2.62038	0.008783	-/+
OR10AE3P	THAP9-AS1	-0.00961	0.830007	0.356891	0.005959	2.61781	0.00885	0/+
SLITRK6	THAP9-AS1	-0.11273	0.011486	0.262867	0.046199	2.61421	0.008943	-/+
LOC101927855	THAP9-AS1	0.240351	4.99e-08	-0.13629	0.307656	-2.61348	0.008962	#ERROR!
IL1RAPL2	THAP9-AS1	-0.13945	0.001737	0.237217	0.072981	2.61276	0.008982	-/0
CYP2A6	THAP9-AS1	0.196836	8.88e-06	0.52379	2.45e-05	2.61224	0.008995	#ERROR!
SESN3	THAP9-AS1	0.123811	0.005473	0.467177	0.000218	2.61151	0.009014	#ERROR!
EPB41L2	THAP9-AS1	0.159309	0.000339	0.494932	7.83e-05	2.61076	0.009034	#ERROR!
H2AC7	THAP9-AS1	0.254233	7.6e-09	-0.12135	0.364207	-2.61066	0.009037	#ERROR!
GBE1	THAP9-AS1	0.291636	2.68e-11	0.592869	9.41e-07	2.60961	0.009065	#ERROR!
LINC02188	THAP9-AS1	0.039496	0.3772	0.397807	0.001986	2.60823	0.009101	0/+
DYNC1I2	THAP9-AS1	0.238674	6.21e-08	0.554395	6.32e-06	2.60695	0.009135	#ERROR!
LINC00857	THAP9-AS1	-0.06338	0.156226	0.307399	0.018912	2.60555	0.009173	0/+
NDRG1	THAP9-AS1	0.146579	0.000989	0.484435	0.000117	2.60547	0.009175	#ERROR!
PAPPA	THAP9-AS1	-0.07399	0.097734	0.297682	0.023241	2.60534	0.009178	0/+
MYH14	THAP9-AS1	0.068372	0.12605	0.421404	0.000987	2.6041	0.009212	0/+
LINC00885	THAP9-AS1	0.067461	0.131186	0.420533	0.001013	2.60311	0.009238	0/+
MIR4422HG	THAP9-AS1	0.049568	0.267645	-0.31952	0.01449	-2.60274	0.009248	0/-
TCF4	THAP9-AS1	0.266638	1.28e-09	0.574289	2.43e-06	2.60231	0.00926	#ERROR!
RNU6ATAC	THAP9-AS1	0.204067	4.04e-06	-0.17195	0.196822	-2.60224	0.009262	#ERROR!
RNF144A	THAP9-AS1	0.033768	0.450305	0.392125	0.002333	2.60142	0.009284	0/+
PACSIN2	THAP9-AS1	0.29616	1.27e-11	0.595269	8.29e-07	2.60111	0.009292	#ERROR!
LINC02338	THAP9-AS1	0.131073	0.00326	-0.24336	0.06565	-2.599	0.00935	#ERROR!
CHST15	THAP9-AS1	0.073246	0.101167	0.424634	0.000893	2.5975	0.009391	0/+
FAM111A-DT	THAP9-AS1	0.042935	0.337043	0.399274	0.001904	2.5966	0.009415	0/+
CA10	THAP9-AS1	-0.05473	0.220887	0.314005	0.016378	2.59624	0.009425	0/+
LOC105369760	THAP9-AS1	0.31866	2.6e-13	-0.04955	0.711875	-2.59604	0.009431	#ERROR!
LOC729654	THAP9-AS1	0.137437	0.002027	0.476084	0.000158	2.59505	0.009458	#ERROR!
NALCN	THAP9-AS1	-0.04417	0.323309	0.323305	0.013305	2.59462	0.00947	0/+
CDH6	THAP9-AS1	-0.10884	0.014693	0.263693	0.045494	2.59336	0.009504	-/+
EIF4E2P1	THAP9-AS1	0.092575	0.038129	-0.27889	0.034008	-2.59315	0.00951	#ERROR!
MAPK8IP2	THAP9-AS1	0.046054	0.303095	0.401391	0.001791	2.59247	0.009529	0/+
CD151	THAP9-AS1	0.071895	0.107639	0.422881	0.000943	2.59217	0.009537	0/+
GABBR2	THAP9-AS1	-0.03463	0.438843	0.331057	0.011136	2.58863	0.009636	0/+
RPL18AP6	THAP9-AS1	0.131078	0.003259	-0.24187	0.067365	-2.58825	0.009647	#ERROR!
FLNA	THAP9-AS1	-0.07552	0.090959	0.293589	0.025301	2.58522	0.009732	0/+
GAS6	THAP9-AS1	0.097416	0.029081	0.442937	0.000498	2.58519	0.009733	#ERROR!
PLCD3	THAP9-AS1	-0.01342	0.764214	0.349356	0.007189	2.58503	0.009737	0/+
C6	THAP9-AS1	-0.0355	0.427413	0.32977	0.011474	2.58471	0.009746	0/+
PLEKHA8P1	THAP9-AS1	0.121437	0.006447	0.462161	0.00026	2.58425	0.009759	#ERROR!
PRELID2	THAP9-AS1	0.331054	2.64e-14	0.61808	2.35e-07	2.58332	0.009785	#ERROR!
CCT8L1P	THAP9-AS1	0.177285	6.5e-05	0.505697	5.14e-05	2.58246	0.00981	#ERROR!
FHL2	THAP9-AS1	0.124116	0.005357	0.464016	0.000244	2.5818	0.009829	#ERROR!
ALK	THAP9-AS1	0.051114	0.25299	0.404251	0.001649	2.58114	0.009847	0/+
NOD1	THAP9-AS1	0.020502	0.646771	0.378213	0.00342	2.5805	0.009866	0/+
SEPTIN11	THAP9-AS1	0.04256	0.341286	0.396908	0.002037	2.57995	0.009881	0/+
MYO1C	THAP9-AS1	0.157617	0.000393	0.489879	9.5e-05	2.57703	0.009965	#ERROR!
CAMP	THAP9-AS1	0.040663	0.363262	-0.32406	0.013078	-2.57639	0.009984	0/-
LDLR	THAP9-AS1	-0.10357	0.02029	0.266123	0.043468	2.57476	0.010031	-/+
PADI1	THAP9-AS1	-0.05589	0.211288	0.309997	0.017878	2.5738	0.010059	0/+
HNRNPA1	THAP9-AS1	0.298801	8.21e-12	0.594531	8.62e-07	2.57349	0.010068	#ERROR!
AKIRIN1P1	THAP9-AS1	0.09157	0.040281	0.436758	0.000609	2.57313	0.010078	#ERROR!
CTNNA1	THAP9-AS1	0.220082	6.36e-07	0.537006	1.39e-05	2.57181	0.010117	#ERROR!
CARD10	THAP9-AS1	0.202893	4.6e-06	0.524034	2.42e-05	2.5714	0.010129	#ERROR!
FBXL16	THAP9-AS1	0.150697	0.000706	0.483819	0.000119	2.57119	0.010135	#ERROR!
GSN-AS1	THAP9-AS1	0.154267	0.000523	0.48649	0.000108	2.57008	0.010167	#ERROR!
RALB	THAP9-AS1	0.274902	3.73e-10	0.577027	2.12e-06	2.56934	0.010189	#ERROR!
SIGIRR	THAP9-AS1	0.342401	3.11e-15	-0.01898	0.88754	-2.56905	0.010198	#ERROR!
ATP6	THAP9-AS1	0.134384	0.002552	0.470684	0.000193	2.56874	0.010207	#ERROR!
CDK14	THAP9-AS1	0.115013	0.009907	0.455218	0.00033	2.56868	0.010209	#ERROR!
CAV2	THAP9-AS1	0.112644	0.011551	0.453273	0.000353	2.56833	0.010219	#ERROR!
PTPRH	THAP9-AS1	0.008761	0.844761	0.366564	0.004653	2.56832	0.010219	0/+
C8orf31	THAP9-AS1	0.077783	0.081675	0.424856	0.000887	2.56815	0.010224	0/+
SPP2	THAP9-AS1	-0.09785	0.028365	0.270554	0.039966	2.56791	0.010231	-/+
TACSTD2	THAP9-AS1	-0.11224	0.011857	0.256956	0.051517	2.56744	0.010245	-/0
RBM3	THAP9-AS1	0.222604	4.69e-07	0.538114	1.32e-05	2.56433	0.010337	#ERROR!
COBLL1	THAP9-AS1	0.149604	0.000772	0.482066	0.000127	2.56319	0.010371	#ERROR!
PON3	THAP9-AS1	0.057423	0.198986	0.407312	0.001507	2.56293	0.010379	0/+
HOXA7	THAP9-AS1	-0.02464	0.581817	0.336573	0.009786	2.56271	0.010386	0/+
ACSM1	THAP9-AS1	0.204294	3.94e-06	-0.1661	0.212727	-2.56268	0.010387	#ERROR!
GNPNAT1	THAP9-AS1	0.190577	1.72e-05	0.513736	3.72e-05	2.56264	0.010388	#ERROR!
LOC101927692	THAP9-AS1	0.162619	0.000253	0.492089	8.73e-05	2.56183	0.010412	#ERROR!
LOC391674	THAP9-AS1	0.161188	0.000288	0.490839	9.16e-05	2.56061	0.010449	#ERROR!
DEGS1	THAP9-AS1	0.227949	2.43e-07	0.541497	1.14e-05	2.55848	0.010513	#ERROR!
LINC02593	THAP9-AS1	0.124904	0.005071	0.461919	0.000262	2.55809	0.010525	#ERROR!
RALA	THAP9-AS1	0.218658	7.54e-07	0.534461	1.55e-05	2.55764	0.010539	#ERROR!
MRGPRG-AS1	THAP9-AS1	0.209198	2.27e-06	-0.16029	0.229392	-2.55689	0.010561	#ERROR!
MRPL35P2	THAP9-AS1	0.245199	2.62e-08	0.554045	6.43e-06	2.55611	0.010585	#ERROR!
RPL23AP48	THAP9-AS1	0.080641	0.071039	-0.28496	0.030149	-2.55604	0.010587	0/-
EIF3A	THAP9-AS1	0.203084	4.5e-06	0.522487	2.59e-05	2.55547	0.010604	#ERROR!
RUVBL1-AS1	THAP9-AS1	0.064676	0.147902	0.412203	0.001304	2.55335	0.010669	0/+
AKR1B15	THAP9-AS1	0.033868	0.448957	0.386098	0.002759	2.55218	0.010705	0/+
GLMP	THAP9-AS1	0.134847	0.002465	0.469146	0.000203	2.55202	0.01071	#ERROR!
NBPF9	THAP9-AS1	0.22173	5.22e-07	0.536131	1.44e-05	2.55156	0.010724	#ERROR!
PSME2P3	THAP9-AS1	0.040086	0.370107	-0.32132	0.013917	-2.55147	0.010727	0/-
KCNJ10	THAP9-AS1	0.30619	2.34e-12	-0.05681	0.671896	-2.55134	0.010731	#ERROR!
ALOX12P2	THAP9-AS1	0.339107	5.77e-15	0.620787	2.01e-07	2.55134	0.010731	#ERROR!
OGN	THAP9-AS1	-0.05625	0.208368	0.30654	0.019265	2.55014	0.010768	0/+
PRNP	THAP9-AS1	0.155167	0.000485	0.484927	0.000114	2.54979	0.010779	#ERROR!
SLC6A12	THAP9-AS1	-0.00234	0.958375	0.354041	0.0064	2.5458	0.010903	0/+
LTBP3	THAP9-AS1	-0.00346	0.938311	0.353052	0.00656	2.54577	0.010904	0/+
RNASE4	THAP9-AS1	0.07569	0.090253	0.420346	0.001019	2.54501	0.010927	0/+
MIR4733	THAP9-AS1	0.273296	4.76e-10	-0.09158	0.49416	-2.5449	0.010931	#ERROR!
LINC02436	THAP9-AS1	0.053133	0.234698	-0.30837	0.018518	-2.54265	0.011002	0/-
PXDNL	THAP9-AS1	0.02065	0.644387	0.373519	0.003877	2.54212	0.011018	0/+
ATP6V1FNB	THAP9-AS1	0.108156	0.015336	0.446564	0.000442	2.54189	0.011026	#ERROR!
DKFZP434A062	THAP9-AS1	0.242082	3.97e-08	-0.1241	0.353317	-2.54129	0.011045	#ERROR!
F11R	THAP9-AS1	0.251986	1.04e-08	0.557524	5.46e-06	2.54108	0.011051	#ERROR!
FAXC	THAP9-AS1	0.016786	0.707519	0.369856	0.00427	2.53948	0.011102	0/+
RN7SL370P	THAP9-AS1	0.146388	0.001004	-0.22031	0.096547	-2.53925	0.011109	#ERROR!
HEYL	THAP9-AS1	0.07964	0.074627	0.422832	0.000944	2.53851	0.011132	0/+
SERPINB4	THAP9-AS1	-0.10967	0.013955	0.255408	0.052989	2.53833	0.011138	-/0
S100A2	THAP9-AS1	-0.09716	0.029515	0.2671	0.042674	2.53766	0.01116	-/+
CAPZA2	THAP9-AS1	0.240599	4.82e-08	0.548743	8.2e-06	2.53746	0.011166	#ERROR!
HOXA6	THAP9-AS1	0.004823	0.914161	0.35915	0.005628	2.53687	0.011185	0/+
AEBP1	THAP9-AS1	-0.06865	0.124492	0.293097	0.025558	2.53432	0.011267	0/+
CD9	THAP9-AS1	0.2766	2.88e-10	0.574505	2.41e-06	2.53098	0.011374	#ERROR!
EPHX3	THAP9-AS1	-0.1135	0.010928	0.250743	0.057632	2.53083	0.011379	-/0
FBLN2	THAP9-AS1	-0.06289	0.159434	0.297839	0.023165	2.53027	0.011397	0/+
COL12A1	THAP9-AS1	0.063604	0.154751	0.408429	0.001458	2.52968	0.011417	0/+
CCDC91	THAP9-AS1	0.444862	0	0.690025	2.08e-09	2.52759	0.011485	#ERROR!
PTGIS	THAP9-AS1	-0.10206	0.022201	0.261067	0.047769	2.52717	0.011499	-/+
BACE2	THAP9-AS1	0.074768	0.094253	0.417381	0.001116	2.52677	0.011512	0/+
GTF2IP4	THAP9-AS1	0.190953	1.65e-05	0.510129	4.3e-05	2.52656	0.011519	#ERROR!
GRM1	THAP9-AS1	0.207345	2.8e-06	0.522635	2.57e-05	2.52645	0.011522	#ERROR!
RELL1	THAP9-AS1	-0.03664	0.412684	0.3211	0.013985	2.52624	0.011529	0/+
RAB18	THAP9-AS1	0.316173	4.07e-13	0.602313	5.67e-07	2.52521	0.011563	#ERROR!
KRTAP19-5	THAP9-AS1	0.076034	0.088794	-0.28505	0.030095	-2.52502	0.011569	0/-
RAD18	THAP9-AS1	0.210777	1.89e-06	0.525033	2.32e-05	2.52452	0.011586	#ERROR!
OR1E1	THAP9-AS1	0.018003	0.687393	0.368992	0.004368	2.52432	0.011592	0/+
RPSAP40	THAP9-AS1	0.018962	0.671694	-0.33646	0.009811	-2.52305	0.011634	0/-
RN7SL569P	THAP9-AS1	0.229416	2.03e-07	-0.13455	0.313934	-2.52225	0.011661	#ERROR!
PDLIM4	THAP9-AS1	-0.10111	0.023475	0.261136	0.047708	2.52114	0.011697	-/+
RPL23AP25	THAP9-AS1	0.314254	5.73e-13	-0.04321	0.747427	-2.51913	0.011764	#ERROR!
SNRPCP11	THAP9-AS1	0.099216	0.026221	0.4366	0.000612	2.51905	0.011767	#ERROR!
EMILIN1	THAP9-AS1	-0.13859	0.001856	0.225052	0.089413	2.5189	0.011772	-/0
ASB4	THAP9-AS1	0.081556	0.067883	0.421942	0.00097	2.51793	0.011805	0/+
PCNX2	THAP9-AS1	0.148384	0.000854	0.475914	0.000159	2.51714	0.011831	#ERROR!
SH3RF2	THAP9-AS1	0.250417	1.29e-08	0.553841	6.49e-06	2.5161	0.011866	#ERROR!
RBM7	THAP9-AS1	0.241218	4.45e-08	0.546997	8.88e-06	2.5159	0.011873	#ERROR!
RAB40A	THAP9-AS1	0.343535	2.22e-15	0.620653	2.02e-07	2.51558	0.011884	#ERROR!
TK2	THAP9-AS1	0.209932	2.09e-06	0.523356	2.49e-05	2.51475	0.011912	#ERROR!
CTDSPL	THAP9-AS1	0.090727	0.042164	0.428901	0.000782	2.51285	0.011976	#ERROR!
GOLGA8F	THAP9-AS1	0.216867	9.32e-07	-0.14595	0.274324	-2.51141	0.012025	#ERROR!
LINC00574	THAP9-AS1	0.000286	0.9949	0.351932	0.006746	2.51141	0.012025	0/+
PCDHGB4	THAP9-AS1	0.087998	0.048776	0.426444	0.000844	2.5111	0.012036	#ERROR!
PALM	THAP9-AS1	-0.04434	0.321491	0.312077	0.017085	2.51038	0.01206	0/+
PIK3R1	THAP9-AS1	0.10519	0.018399	0.440384	0.000541	2.5098	0.01208	#ERROR!
PBLD	THAP9-AS1	0.33531	1.18e-14	0.614379	2.9e-07	2.5098	0.01208	#ERROR!
ACTN4	THAP9-AS1	0.206238	3.17e-06	0.519841	2.89e-05	2.50814	0.012137	#ERROR!
CCNE1	THAP9-AS1	0.309451	1.33e-12	-0.04688	0.726779	-2.5079	0.012145	#ERROR!
MASP1	THAP9-AS1	0.081972	0.066487	0.421039	0.000998	2.50755	0.012157	0/+
MIR3168	THAP9-AS1	0.138273	0.001901	-0.22355	0.091631	-2.50588	0.012215	#ERROR!
SMYD2	THAP9-AS1	0.314101	5.88e-13	0.598969	6.8e-07	2.50517	0.012239	#ERROR!
CDC20	THAP9-AS1	0.12586	0.004741	-0.23535	0.075335	-2.50467	0.012256	#ERROR!
OR2P1P	THAP9-AS1	-0.08215	0.065883	0.276584	0.035576	2.50429	0.01227	0/+
PCLAF	THAP9-AS1	0.306684	2.15e-12	-0.04933	0.713073	-2.50382	0.012286	#ERROR!
PDXK	THAP9-AS1	0.153369	0.000564	0.478344	0.000146	2.50378	0.012287	#ERROR!
IL20RA	THAP9-AS1	0.053537	0.231156	0.396748	0.002047	2.50344	0.012299	0/+
PALD1	THAP9-AS1	0.120031	0.007095	0.451633	0.000373	2.50304	0.012313	#ERROR!
RAC1P7	THAP9-AS1	-0.04231	0.344186	0.312914	0.016775	2.5028	0.012321	0/+
SLC25A37	THAP9-AS1	0.306505	2.22e-12	0.593208	9.24e-07	2.50154	0.012366	#ERROR!
RN7SL535P	THAP9-AS1	0.19296	1.34e-05	0.50891	4.52e-05	2.50106	0.012382	#ERROR!
SPRR1A	THAP9-AS1	-0.14154	0.001476	0.21967	0.097551	2.50079	0.012392	-/0
LINC00242	THAP9-AS1	-0.04077	0.361945	0.313999	0.01638	2.50055	0.0124	0/+
BCHE	THAP9-AS1	0.118171	0.00804	0.449834	0.000396	2.5005	0.012402	#ERROR!
CD55	THAP9-AS1	-0.03561	0.425923	0.318598	0.014792	2.50015	0.012414	0/+
RNU6-48P	THAP9-AS1	0.17586	7.45e-05	0.495217	7.75e-05	2.49692	0.012528	#ERROR!
FCER1A	THAP9-AS1	-0.0999	0.025202	0.258863	0.049749	2.49611	0.012556	-/+
LOC100287944	THAP9-AS1	0.310513	1.11e-12	0.595495	8.19e-07	2.49543	0.01258	#ERROR!
ASAP2	THAP9-AS1	0.030462	0.495898	0.376061	0.003623	2.49522	0.012588	0/+
ATL1	THAP9-AS1	0.181497	4.31e-05	0.499339	6.6e-05	2.49455	0.012612	#ERROR!
MAP3K20	THAP9-AS1	0.146951	0.000959	0.472214	0.000182	2.49453	0.012612	#ERROR!
RNU6-933P	THAP9-AS1	-0.09296	0.037333	0.265015	0.044382	2.49337	0.012654	-/+
H3C8	THAP9-AS1	0.347738	8.88e-16	-0.00174	0.989659	-2.49259	0.012682	#ERROR!
LIMS1	THAP9-AS1	0.250191	1.33e-08	0.551218	7.32e-06	2.49193	0.012705	#ERROR!
SHISA9	THAP9-AS1	-0.01179	0.79221	0.338577	0.009331	2.49029	0.012764	0/+
MIR4294	THAP9-AS1	0.197813	8e-06	-0.16221	0.223788	-2.48916	0.012804	#ERROR!
OPN3	THAP9-AS1	0.089726	0.044496	0.425155	0.000879	2.48842	0.012831	#ERROR!
RHOQ	THAP9-AS1	0.313395	6.67e-13	0.596776	7.65e-07	2.48719	0.012876	#ERROR!
DCAF6	THAP9-AS1	0.255823	6.08e-09	0.554887	6.18e-06	2.48694	0.012885	#ERROR!
DAW1	THAP9-AS1	-0.09932	0.026058	0.258061	0.050486	2.48626	0.012909	-/0
ARL13B	THAP9-AS1	0.208504	2.45e-06	0.519196	2.97e-05	2.48591	0.012922	#ERROR!
RNU6-529P	THAP9-AS1	0.127999	0.004072	0.456047	0.000321	2.48572	0.012929	#ERROR!
TBX18	THAP9-AS1	0.069279	0.121091	0.407796	0.001486	2.48552	0.012936	0/+
MIR571	THAP9-AS1	0.137335	0.002042	-0.22146	0.094786	-2.4843	0.012981	#ERROR!
F12	THAP9-AS1	0.20303	4.53e-06	-0.1561	0.241956	-2.48347	0.013011	#ERROR!
B4GALT1	THAP9-AS1	0.187108	2.45e-05	0.50243	5.85e-05	2.48305	0.013026	#ERROR!
PLXNB2	THAP9-AS1	0.094992	0.03335	0.428818	0.000784	2.48274	0.013038	#ERROR!
CEP170B	THAP9-AS1	0.120153	0.007036	0.449336	0.000403	2.48249	0.013047	#ERROR!
CRYM	THAP9-AS1	-0.00389	0.930644	0.344537	0.008087	2.48245	0.013048	0/+
LOC283335	THAP9-AS1	0.325695	7.19e-14	0.60507	4.88e-07	2.48228	0.013054	#ERROR!
IL1RAP	THAP9-AS1	-0.00316	0.943683	0.345075	0.007982	2.48161	0.013079	0/+
HS3ST4	THAP9-AS1	-0.02816	0.529005	0.322661	0.013501	2.48012	0.013134	0/+
LINC00051	THAP9-AS1	0.167364	0.000165	0.486615	0.000107	2.47928	0.013165	#ERROR!
ARHGAP1	THAP9-AS1	0.116643	0.008901	0.446075	0.000449	2.47895	0.013177	#ERROR!
GRIA1	THAP9-AS1	0.044747	0.317028	0.38603	0.002764	2.47714	0.013244	0/+
SIPA1L2	THAP9-AS1	0.11926	0.007474	0.447904	0.000423	2.47643	0.013271	#ERROR!
H2AC21	THAP9-AS1	0.09935	0.026018	-0.25666	0.051794	-2.4762	0.013279	#ERROR!
PLAAT3	THAP9-AS1	0.10469	0.018965	0.435954	0.000625	2.47578	0.013294	#ERROR!
RN7SL310P	THAP9-AS1	0.066062	0.139387	0.403742	0.001673	2.47443	0.013345	0/+
COL11A1	THAP9-AS1	-0.12376	0.005491	0.232978	0.07841	2.47295	0.0134	-/0
RNU6-110P	THAP9-AS1	0.081146	0.069283	0.416035	0.001162	2.47177	0.013445	0/+
RAB14	THAP9-AS1	0.278313	2.21e-10	0.569829	3.03e-06	2.47077	0.013482	#ERROR!
C19orf33	THAP9-AS1	-0.11002	0.013646	0.245781	0.062927	2.47057	0.01349	-/0
SH2D4A	THAP9-AS1	0.109996	0.013669	0.439461	0.000558	2.46874	0.013559	#ERROR!
RBFOX2	THAP9-AS1	0.227747	2.5e-07	0.531939	1.73e-05	2.46815	0.013581	#ERROR!
KLHL2	THAP9-AS1	0.15182	0.000643	0.473052	0.000177	2.46786	0.013592	#ERROR!
FOXP2	THAP9-AS1	0.261008	2.91e-09	0.556786	5.66e-06	2.46774	0.013597	#ERROR!
HMGB3P26	THAP9-AS1	0.109092	0.014467	-0.24624	0.062424	-2.46746	0.013608	#ERROR!
AFAP1L1	THAP9-AS1	0.31952	2.23e-13	0.599265	6.69e-07	2.46714	0.01362	#ERROR!
LRRFIP1	THAP9-AS1	0.339734	4.88e-15	0.613572	3.04e-07	2.46681	0.013632	#ERROR!
SNORD36C	THAP9-AS1	0.26357	2.01e-09	-0.09029	0.500282	-2.46436	0.013726	#ERROR!
KLHL13	THAP9-AS1	-0.01478	0.741061	0.332426	0.010787	2.4634	0.013763	0/+
SRPX	THAP9-AS1	0.028064	0.530441	0.36997	0.004257	2.46326	0.013768	0/+
LOC101927531	THAP9-AS1	-0.10257	0.021534	0.251785	0.056568	2.4628	0.013786	-/0
MTND1P30	THAP9-AS1	-0.15293	0.000586	0.203228	0.126001	2.46269	0.01379	-/0
REEP1	THAP9-AS1	0.211624	1.72e-06	0.519089	2.98e-05	2.46259	0.013794	#ERROR!
DPYSL3	THAP9-AS1	0.004256	0.924217	0.349022	0.007248	2.46158	0.013833	0/+
INHBB	THAP9-AS1	0.00335	0.940314	0.348191	0.007398	2.46131	0.013843	0/+
SLC27A6	THAP9-AS1	-0.07452	0.095345	0.277844	0.034712	2.46111	0.013851	0/+
SNW1	THAP9-AS1	0.372682	0	0.636059	8.08e-08	2.46103	0.013854	#ERROR!
SLC26A2	THAP9-AS1	0.052877	0.236971	0.390796	0.002421	2.45981	0.013901	0/+
LINC02881	THAP9-AS1	-0.04989	0.264562	0.30024	0.022028	2.45912	0.013928	0/+
CYSRT1	THAP9-AS1	0.060882	0.173215	0.397213	0.00202	2.45683	0.014017	0/+
FGA	THAP9-AS1	-0.11224	0.011856	0.241771	0.067486	2.45676	0.01402	-/0
LOC101928834	THAP9-AS1	-0.000283	0.994953	0.344344	0.008125	2.45627	0.014039	0/+
MAGI2-AS3	THAP9-AS1	0.147654	0.000906	0.468285	0.00021	2.45513	0.014083	#ERROR!
SCN1A	THAP9-AS1	0.016201	0.717265	0.358549	0.005714	2.45437	0.014113	0/+
LINC00923	THAP9-AS1	0.135338	0.002376	0.458294	0.000297	2.45408	0.014125	#ERROR!
RNU5E-7P	THAP9-AS1	0.098896	0.026711	-0.25401	0.054351	-2.45364	0.014142	#ERROR!
MTND4P6	THAP9-AS1	-0.03051	0.495217	0.317036	0.015316	2.45334	0.014154	0/+
RGMA	THAP9-AS1	0.086512	0.052729	0.418145	0.00109	2.45228	0.014195	0/+
PPP2R2B	THAP9-AS1	0.078017	0.080757	0.41105	0.001349	2.45218	0.014199	0/+
RN7SL525P	THAP9-AS1	0.0745	0.095445	0.408039	0.001475	2.45163	0.014221	0/+
KCNQ3	THAP9-AS1	-0.08298	0.063214	0.268588	0.04149	2.45089	0.01425	0/+
LRATD2	THAP9-AS1	0.128248	0.004	0.45218	0.000366	2.45068	0.014259	#ERROR!
NOTCH2	THAP9-AS1	0.035683	0.425012	0.374646	0.003762	2.44822	0.014356	0/+
PYGL	THAP9-AS1	-0.00568	0.898914	0.338506	0.009347	2.44802	0.014364	0/+
ABCA4	THAP9-AS1	0.086084	0.053916	0.417255	0.00112	2.44787	0.014371	0/+
GLP1R	THAP9-AS1	0.074404	0.095872	0.407463	0.001501	2.44757	0.014382	0/+
AA06	THAP9-AS1	0.047988	0.283219	-0.30034	0.02198	-2.44687	0.01441	0/-
LINC01629	THAP9-AS1	-0.09416	0.034929	0.257545	0.050965	2.44687	0.01441	-/0
MOB3B	THAP9-AS1	0.261546	2.69e-09	0.555063	6.13e-06	2.44675	0.014415	#ERROR!
CPA3	THAP9-AS1	-0.13164	0.003127	0.221702	0.094413	2.44642	0.014428	-/0
HNRNPA1P19	THAP9-AS1	-0.03657	0.413601	-0.37511	0.003716	-2.44582	0.014452	0/-
HEXB	THAP9-AS1	0.157998	0.00038	0.475421	0.000162	2.44549	0.014466	#ERROR!
PPL	THAP9-AS1	-0.02272	0.611541	0.322967	0.013408	2.44523	0.014476	0/+
RN7SL317P	THAP9-AS1	-0.0381	0.394357	0.308856	0.018326	2.44328	0.014555	0/+
PAQR9-AS1	THAP9-AS1	0.063365	0.15631	-0.28562	0.029751	-2.44225	0.014596	0/-
PCDHB2	THAP9-AS1	0.11114	0.012715	0.43725	0.000599	2.44211	0.014602	#ERROR!
RASSF9	THAP9-AS1	0.202579	4.76e-06	0.509713	4.38e-05	2.44004	0.014686	#ERROR!
DIAPH1	THAP9-AS1	0.06375	0.153798	0.397564	0.001999	2.43999	0.014688	0/+
ELOA2	THAP9-AS1	0.222661	4.66e-07	0.525077	2.32e-05	2.43969	0.0147	#ERROR!
LRRC55	THAP9-AS1	0.078062	0.080581	0.409538	0.001411	2.43944	0.01471	0/+
PHACTR3	THAP9-AS1	-0.01692	0.705369	0.327358	0.01213	2.4391	0.014724	0/+
RNA5SP345	THAP9-AS1	0.09259	0.038097	0.42148	0.000984	2.43807	0.014766	#ERROR!
CEMIP	THAP9-AS1	0.063714	0.154031	0.397225	0.002019	2.43749	0.01479	0/+
CNOT4P1	THAP9-AS1	0.035067	0.433054	-0.31051	0.017679	-2.43505	0.01489	0/-
ADK	THAP9-AS1	0.21729	8.87e-07	0.520426	2.82e-05	2.43451	0.014912	#ERROR!
MATN3	THAP9-AS1	0.046837	0.294933	0.382454	0.003048	2.43414	0.014927	0/+
ABHD4	THAP9-AS1	0.267318	1.16e-09	0.558056	5.33e-06	2.43396	0.014935	#ERROR!
RPS20P17	THAP9-AS1	0.078247	0.079864	-0.2707	0.039857	-2.43389	0.014937	0/-
DCLK1	THAP9-AS1	-0.10451	0.019177	0.245851	0.06285	2.43292	0.014978	-/0
GLI1	THAP9-AS1	0.026715	0.550397	0.364913	0.004856	2.43251	0.014994	0/+
CALU	THAP9-AS1	0.189881	1.85e-05	0.498954	6.7e-05	2.43168	0.015029	#ERROR!
OR7C1	THAP9-AS1	0.130954	0.003288	-0.22018	0.096756	-2.4307	0.01507	#ERROR!
BTBD1	THAP9-AS1	0.258114	4.4e-09	0.550818	7.46e-06	2.43011	0.015094	#ERROR!
NRAS	THAP9-AS1	0.240735	4.74e-08	0.537775	1.34e-05	2.43009	0.015095	#ERROR!
EGLN3	THAP9-AS1	-0.09709	0.029627	0.252476	0.05587	2.42999	0.015099	-/0
SHISA3	THAP9-AS1	0.046588	0.297516	0.381689	0.003113	2.42973	0.01511	0/+
MRC2	THAP9-AS1	-0.01054	0.813722	0.331785	0.010949	2.42947	0.015121	0/+
SEPTIN10	THAP9-AS1	0.271332	6.39e-10	0.560578	4.73e-06	2.42946	0.015121	#ERROR!
SPATA5	THAP9-AS1	0.232157	1.44e-07	0.531216	1.78e-05	2.42943	0.015123	#ERROR!
SRGAP2C	THAP9-AS1	0.198369	7.53e-06	0.505245	5.23e-05	2.42889	0.015145	#ERROR!
RPL7P50	THAP9-AS1	0.041972	0.348008	-0.30342	0.020594	-2.42879	0.015149	0/-
BNIP3P15	THAP9-AS1	0.253097	8.9e-09	0.546906	8.92e-06	2.42852	0.015161	#ERROR!
TMEM14EP	THAP9-AS1	0.019798	0.658121	-0.32338	0.013281	-2.42842	0.015165	0/-
ERI1	THAP9-AS1	0.226708	2.84e-07	0.526848	2.15e-05	2.42728	0.015212	#ERROR!
IGFBP5	THAP9-AS1	-0.00479	0.914675	0.336379	0.009831	2.42552	0.015287	0/+
GRIP1	THAP9-AS1	0.208977	2.33e-06	0.513043	3.82e-05	2.42519	0.0153	#ERROR!
RN7SL589P	THAP9-AS1	0.231721	1.52e-07	0.530377	1.85e-05	2.42459	0.015326	#ERROR!
ECE1	THAP9-AS1	-0.01602	0.720241	0.326258	0.01244	2.42457	0.015326	0/+
RAB11FIP1	THAP9-AS1	-0.01723	0.700172	0.32512	0.012767	2.42412	0.015346	0/+
SPATS2L	THAP9-AS1	0.110225	0.013473	0.434331	0.000658	2.4238	0.015359	#ERROR!
FKBP9	THAP9-AS1	0.206006	3.25e-06	0.510459	4.25e-05	2.42248	0.015415	#ERROR!
ITGA9	THAP9-AS1	0.110703	0.013073	0.434508	0.000654	2.422	0.015435	#ERROR!
ARHGEF9-IT1	THAP9-AS1	0.126665	0.004478	-0.22311	0.092286	-2.42195	0.015437	#ERROR!
RN7SL79P	THAP9-AS1	0.080284	0.072303	-0.26713	0.042647	-2.42166	0.01545	0/-
BGN	THAP9-AS1	-0.00717	0.872604	0.333764	0.010455	2.42166	0.01545	0/+
CSAG1	THAP9-AS1	0.131035	0.003269	-0.2186	0.099231	-2.41993	0.015523	#ERROR!
FZD1	THAP9-AS1	0.208794	2.38e-06	0.512212	3.95e-05	2.4188	0.015572	#ERROR!
ANO9	THAP9-AS1	0.390446	0	0.058771	0.661225	-2.41656	0.015668	#ERROR!
BRINP1	THAP9-AS1	-0.08531	0.056128	0.261569	0.047327	2.41532	0.015721	0/+
MET	THAP9-AS1	-0.04461	0.318511	0.299188	0.02252	2.41506	0.015733	0/+
OXGR1	THAP9-AS1	0.129303	0.003707	0.448677	0.000412	2.41331	0.015808	#ERROR!
COL6A2	THAP9-AS1	-0.05805	0.194121	0.286576	0.029187	2.41287	0.015828	0/+
FSTL1	THAP9-AS1	0.098715	0.026992	0.42325	0.000932	2.41054	0.015929	#ERROR!
RPS2P23	THAP9-AS1	0.094683	0.033932	-0.25208	0.056266	-2.41052	0.01593	#ERROR!
NXPH1	THAP9-AS1	-0.0057	0.898716	0.333528	0.010513	2.40973	0.015964	0/+
DHCR7	THAP9-AS1	0.210875	1.87e-06	0.512828	3.86e-05	2.40962	0.015969	#ERROR!
COL8A2	THAP9-AS1	-0.10946	0.014134	0.237849	0.072197	2.4091	0.015992	-/0
LOC100507334	THAP9-AS1	0.095515	0.032387	0.420389	0.001018	2.40883	0.016004	#ERROR!
LINC00595	THAP9-AS1	0.030013	0.502268	0.36469	0.004884	2.40819	0.016032	0/+
CLCA3P	THAP9-AS1	0.275155	3.59e-10	-0.06955	0.603892	-2.40708	0.016081	#ERROR!
GHRLOS	THAP9-AS1	0.390807	0	0.643905	4.96e-08	2.40683	0.016092	#ERROR!
SLC44A3	THAP9-AS1	0.192068	1.47e-05	0.497923	6.98e-05	2.40679	0.016094	#ERROR!
ARHGEF37	THAP9-AS1	0.131577	0.003142	0.449742	0.000397	2.40662	0.016101	#ERROR!
RTL3	THAP9-AS1	-0.05726	0.200241	0.286415	0.029282	2.40627	0.016116	0/+
ATP8	THAP9-AS1	0.185989	2.75e-05	0.493079	8.41e-05	2.40599	0.016129	#ERROR!
MIR124-1HG	THAP9-AS1	0.056555	0.205874	-0.28686	0.029022	-2.4047	0.016186	0/-
FN1	THAP9-AS1	-0.16219	0.000263	0.185893	0.162381	2.40442	0.016198	-/0
BEAN1-AS1	THAP9-AS1	0.208776	2.38e-06	0.510612	4.22e-05	2.40411	0.016212	#ERROR!
MAL2	THAP9-AS1	0.173939	8.95e-05	0.483358	0.000121	2.40387	0.016223	#ERROR!
PTGFRN	THAP9-AS1	0.086521	0.052706	0.412182	0.001305	2.40297	0.016263	0/+
RNF183	THAP9-AS1	0.018961	0.671708	0.354253	0.006367	2.40185	0.016312	0/+
PPIP5K1	THAP9-AS1	0.415627	0	0.660427	1.69e-08	2.40076	0.016361	#ERROR!
LOC101927020	THAP9-AS1	0.071733	0.108434	0.399464	0.001894	2.40061	0.016368	0/+
LRRN4CL	THAP9-AS1	-0.02389	0.593365	0.316009	0.015669	2.40024	0.016384	0/+
CACNA1G	THAP9-AS1	0.024124	0.58973	0.358426	0.005732	2.39922	0.01643	0/+
NCOR2	THAP9-AS1	0.109414	0.014178	0.430725	0.000738	2.39909	0.016436	#ERROR!
ANKRD2	THAP9-AS1	-0.06713	0.133094	-0.39525	0.002136	-2.39803	0.016483	0/-
ND6	THAP9-AS1	0.204638	3.79e-06	0.506737	4.93e-05	2.39792	0.016488	#ERROR!
ARL6IP5	THAP9-AS1	0.1956	1.01e-05	0.499662	6.52e-05	2.39752	0.016507	#ERROR!
TGFB3	THAP9-AS1	0.066132	0.13897	0.394088	0.002207	2.39546	0.016599	0/+
PCDHGC3	THAP9-AS1	0.001544	0.97247	0.33802	0.009456	2.39484	0.016627	0/+
RPL7AP10	THAP9-AS1	0.234284	1.09e-07	0.529101	1.95e-05	2.39394	0.016669	#ERROR!
SCN7A	THAP9-AS1	0.031243	0.484906	0.363927	0.004981	2.39376	0.016677	0/+
PCDHGB3	THAP9-AS1	0.138294	0.001898	0.4536	0.000349	2.39298	0.016712	#ERROR!
RN7SKP239	THAP9-AS1	0.293449	1.99e-11	0.57326	2.56e-06	2.39292	0.016715	#ERROR!
NIFKP8	THAP9-AS1	0.149359	0.000788	-0.19686	0.138565	-2.39238	0.016739	#ERROR!
RN7SL559P	THAP9-AS1	0.134101	0.002606	0.450098	0.000393	2.3921	0.016752	#ERROR!
CLDN8	THAP9-AS1	0.167683	0.00016	0.477052	0.000153	2.39189	0.016762	#ERROR!
PLBD1-AS1	THAP9-AS1	0.066958	0.134091	0.39434	0.002191	2.39183	0.016765	0/+
LINC01704	THAP9-AS1	0.206426	3.1e-06	-0.13945	0.296487	-2.39134	0.016787	#ERROR!
S100A10	THAP9-AS1	-0.15653	0.000432	0.189649	0.15391	2.39132	0.016788	-/0
FRMPD3-AS1	THAP9-AS1	0.05734	0.199639	0.385842	0.002778	2.38932	0.01688	0/+
GNGT1	THAP9-AS1	-0.00325	0.942142	0.33295	0.010656	2.38855	0.016915	0/+
RSPO3	THAP9-AS1	-0.08173	0.067314	0.261167	0.04768	2.38772	0.016953	0/+
PACERR	THAP9-AS1	0.245998	2.35e-08	0.537327	1.37e-05	2.38753	0.016962	#ERROR!
HAND2	THAP9-AS1	0.029744	0.506114	0.361792	0.005262	2.38721	0.016977	0/+
RET	THAP9-AS1	-0.06388	0.152948	0.277638	0.034851	2.3865	0.017009	0/+
PPP1R13L	THAP9-AS1	0.170579	0.000123	0.47869	0.000144	2.38602	0.017032	#ERROR!
GFPT2	THAP9-AS1	-0.06464	0.148098	0.276828	0.035407	2.38574	0.017045	0/+
H3C4	THAP9-AS1	0.323783	1.03e-13	-0.01305	0.922524	-2.38535	0.017063	#ERROR!
SORL1	THAP9-AS1	0.04018	0.368994	0.370586	0.004189	2.3852	0.01707	0/+
COX1	THAP9-AS1	0.192395	1.42e-05	0.495786	7.58e-05	2.38506	0.017076	#ERROR!
SMURF1	THAP9-AS1	0.174558	8.44e-05	0.481612	0.000129	2.38395	0.017128	#ERROR!
KRT18P55	THAP9-AS1	0.072145	0.106416	-0.26961	0.040695	-2.3839	0.01713	0/-
RN7SL854P	THAP9-AS1	0.045116	0.313049	-0.29452	0.024819	-2.38353	0.017147	0/-
CDCA3	THAP9-AS1	0.403226	0	0.07876	0.556753	-2.38296	0.017174	#ERROR!
KLHL32	THAP9-AS1	0.11808	0.00809	0.435878	0.000626	2.38245	0.017198	#ERROR!
NFIA-AS2	THAP9-AS1	0.147638	0.000907	0.459881	0.000281	2.38202	0.017218	#ERROR!
OR8D4	THAP9-AS1	0.042658	0.34017	0.372315	0.004002	2.38194	0.017222	0/+
SLC35F2	THAP9-AS1	0.063274	0.156905	0.38986	0.002485	2.38094	0.017268	0/+
SPECC1	THAP9-AS1	-0.04982	0.265225	0.289788	0.027349	2.38038	0.017295	0/+
FGF2	THAP9-AS1	0.026183	0.558364	0.357682	0.005841	2.3793	0.017346	0/+
LOC391711	THAP9-AS1	0.119289	0.007459	0.436481	0.000614	2.37916	0.017352	#ERROR!
PDZRN3	THAP9-AS1	-0.10836	0.015145	0.234757	0.076094	2.37906	0.017357	-/0
OLFML1	THAP9-AS1	0.080021	0.073245	0.403716	0.001674	2.37828	0.017393	0/+
NIBAN2	THAP9-AS1	-0.00417	0.925699	0.33078	0.011208	2.3782	0.017397	0/+
CUX2	THAP9-AS1	0.184757	3.11e-05	0.489026	9.81e-05	2.3782	0.017397	#ERROR!
ACVR1	THAP9-AS1	0.13822	0.001909	0.451735	0.000372	2.37746	0.017432	#ERROR!
TES	THAP9-AS1	0.278452	2.16e-10	0.560631	4.72e-06	2.37734	0.017438	#ERROR!
KCTD9	THAP9-AS1	0.357923	0	0.618279	2.32e-07	2.37708	0.01745	#ERROR!
FRMD3	THAP9-AS1	0.182153	4.04e-05	0.486711	0.000107	2.37585	0.017508	#ERROR!
DBX2	THAP9-AS1	0.052575	0.239661	0.380015	0.003257	2.37532	0.017534	0/+
SYT14	THAP9-AS1	0.059056	0.18649	0.385529	0.002802	2.37503	0.017548	0/+
CLEC5A	THAP9-AS1	-0.07236	0.105367	0.268131	0.041851	2.37452	0.017572	0/+
MTRF1LP1	THAP9-AS1	0.013595	0.761242	0.346018	0.007801	2.37438	0.017578	0/+
PLA2R1	THAP9-AS1	0.184631	3.15e-05	0.488434	0.0001	2.37377	0.017608	#ERROR!
AWAT1	THAP9-AS1	0.02599	0.561266	0.356796	0.005973	2.37368	0.017612	0/+
LMX1B	THAP9-AS1	0.113905	0.010648	0.43129	0.000725	2.37275	0.017656	#ERROR!
HGF	THAP9-AS1	0.02478	0.579646	0.355543	0.006164	2.37214	0.017685	0/+
PRL	THAP9-AS1	-0.02122	0.635209	0.314674	0.016138	2.37188	0.017698	0/+
CLIC2	THAP9-AS1	0.33443	1.38e-14	0.601021	6.09e-07	2.37178	0.017703	#ERROR!
NEK6	THAP9-AS1	-0.07822	0.079977	0.262128	0.046838	2.37064	0.017757	0/+
LINC02868	THAP9-AS1	0.054794	0.220375	-0.28389	0.0308	-2.37056	0.017761	0/-
ANXA7	THAP9-AS1	0.336355	9.77e-15	0.60219	5.71e-07	2.36948	0.017813	#ERROR!
CACNG4	THAP9-AS1	-0.10183	0.022501	0.239599	0.070065	2.36902	0.017835	-/0
LUCAT1	THAP9-AS1	-0.00182	0.967484	0.331667	0.01098	2.36895	0.017838	0/+
HMGXB4	THAP9-AS1	0.221268	5.52e-07	0.516427	3.33e-05	2.36856	0.017858	#ERROR!
PEA15	THAP9-AS1	0.161334	0.000284	0.469269	0.000202	2.36795	0.017887	#ERROR!
SPTSSA	THAP9-AS1	0.270423	7.32e-10	0.553679	6.54e-06	2.36777	0.017896	#ERROR!
SORCS2	THAP9-AS1	-0.00114	0.979739	0.332041	0.010884	2.36713	0.017927	0/+
KRT17P3	THAP9-AS1	-0.01618	0.71754	0.318503	0.014823	2.36652	0.017956	0/+
SNORA38	THAP9-AS1	0.118588	0.007819	0.434399	0.000657	2.36645	0.01796	#ERROR!
RETREG1	THAP9-AS1	0.266909	1.23e-09	0.550888	7.43e-06	2.36621	0.017971	#ERROR!
RHEB	THAP9-AS1	0.300161	6.54e-12	0.575243	2.32e-06	2.36283	0.018136	#ERROR!
RNU6-1305P	THAP9-AS1	-0.00501	0.910774	0.327997	0.011953	2.36261	0.018146	0/+
LAPTM4A	THAP9-AS1	0.320675	1.81e-13	0.590141	1.09e-06	2.36184	0.018185	#ERROR!
PCP4	THAP9-AS1	0.038389	0.390728	0.366033	0.004717	2.36145	0.018203	0/+
PTCHD3	THAP9-AS1	0.017544	0.694961	0.347826	0.007464	2.36143	0.018205	0/+
FAM102B	THAP9-AS1	0.093656	0.035924	0.413105	0.001269	2.36139	0.018207	#ERROR!
RAD1	THAP9-AS1	0.24276	3.63e-08	0.532115	1.72e-05	2.36118	0.018217	#ERROR!
FGL2	THAP9-AS1	-0.02002	0.65453	0.3142	0.016308	2.36005	0.018273	0/+
RN7SL806P	THAP9-AS1	0.155886	0.000456	0.463846	0.000245	2.35877	0.018336	#ERROR!
LOC101928489	THAP9-AS1	-0.06051	0.175839	0.276991	0.035295	2.35859	0.018345	0/+
RNU1-94P	THAP9-AS1	0.184149	3.31e-05	-0.15741	0.23797	-2.35856	0.018346	#ERROR!
PLS3-AS1	THAP9-AS1	0.284044	9.04e-11	0.562852	4.25e-06	2.358	0.018373	#ERROR!
RAP1GDS1	THAP9-AS1	0.190277	1.77e-05	0.491102	9.07e-05	2.35776	0.018385	#ERROR!
PICALM	THAP9-AS1	0.240217	5.07e-08	0.529808	1.9e-05	2.35767	0.01839	#ERROR!
GRAMD2A	THAP9-AS1	0.186721	2.55e-05	0.488264	0.000101	2.35745	0.018401	#ERROR!
CPED1	THAP9-AS1	0.068681	0.124341	0.391546	0.002371	2.35741	0.018403	0/+
PKP4	THAP9-AS1	0.253044	8.96e-09	0.539375	1.25e-05	2.35588	0.018479	#ERROR!
RN7SL305P	THAP9-AS1	0.006698	0.880996	-0.32553	0.012647	-2.35528	0.018509	0/-
RECQL	THAP9-AS1	0.107404	0.016067	0.423718	0.000919	2.3544	0.018553	#ERROR!
LINC01482	THAP9-AS1	0.093377	0.036482	0.41202	0.001311	2.35438	0.018554	#ERROR!
RNU5F-3P	THAP9-AS1	0.048577	0.277345	0.37394	0.003834	2.3543	0.018557	0/+
SLC18A2	THAP9-AS1	0.044614	0.318473	0.370468	0.004202	2.3539	0.018577	0/+
ACTR3C	THAP9-AS1	0.291453	2.76e-11	0.567919	3.33e-06	2.3537	0.018588	#ERROR!
MGAT5	THAP9-AS1	0.070932	0.112447	0.39298	0.002277	2.35354	0.018596	0/+
PLBD1	THAP9-AS1	-0.05999	0.179607	0.276705	0.035492	2.35289	0.018628	0/+
KCNK1	THAP9-AS1	0.238088	6.7e-08	0.527587	2.09e-05	2.35204	0.018671	#ERROR!
GASK1A	THAP9-AS1	0.054917	0.219334	0.379038	0.003344	2.35145	0.018701	0/+
LINC01331	THAP9-AS1	0.017817	0.690451	0.346776	0.007658	2.3514	0.018703	0/+
OSMR	THAP9-AS1	-0.08599	0.054167	0.252157	0.056191	2.35117	0.018714	0/0
RNU6-728P	THAP9-AS1	0.054092	0.226349	-0.28189	0.03205	-2.3509	0.018728	0/-
SLC6A14P1	THAP9-AS1	-0.09889	0.026727	0.239809	0.069811	2.35021	0.018763	-/0
AIDA	THAP9-AS1	0.174098	8.82e-05	0.477421	0.000151	2.34999	0.018774	#ERROR!
GOLT1B	THAP9-AS1	0.343846	2.22e-15	0.605706	4.71e-07	2.34941	0.018803	#ERROR!
H2AC20	THAP9-AS1	0.192712	1.37e-05	-0.14735	0.269676	-2.34886	0.018831	#ERROR!
RND1	THAP9-AS1	0.252196	1.01e-08	-0.08547	0.523514	-2.34786	0.018881	#ERROR!
CCIN	THAP9-AS1	0.007872	0.860337	0.337532	0.009566	2.34782	0.018883	0/+
KCNJ2-AS1	THAP9-AS1	0.052909	0.23668	0.376627	0.003568	2.34599	0.018977	0/+
RNU6-890P	THAP9-AS1	0.166249	0.000183	0.470638	0.000193	2.34543	0.019005	#ERROR!
MLC1	THAP9-AS1	0.013184	0.768246	-0.31839	0.014861	-2.34513	0.01902	0/-
RSU1	THAP9-AS1	0.311492	9.33e-13	0.581826	1.67e-06	2.34502	0.019026	#ERROR!
SLC6A16	THAP9-AS1	0.185085	3.01e-05	0.485379	0.000113	2.34318	0.01912	#ERROR!
TANC1	THAP9-AS1	0.168552	0.000148	0.472222	0.000182	2.34316	0.019121	#ERROR!
MAN1A1	THAP9-AS1	0.060586	0.175317	0.382829	0.003017	2.34288	0.019136	0/+
BORCS8-MEF2B	THAP9-AS1	0.322476	1.3e-13	-0.00809	0.951913	-2.34147	0.019208	#ERROR!
ENAH	THAP9-AS1	0.185258	2.96e-05	0.485242	0.000113	2.34073	0.019246	#ERROR!
RAMP3	THAP9-AS1	0.248128	1.76e-08	-0.08869	0.507962	-2.34033	0.019267	#ERROR!
SNX7	THAP9-AS1	0.155344	0.000477	0.461253	0.000268	2.34001	0.019283	#ERROR!
AMOTL1	THAP9-AS1	0.125675	0.004803	0.437	0.000604	2.33921	0.019324	#ERROR!
APOBEC3AP1	THAP9-AS1	0.112224	0.011866	-0.2255	0.08876	-2.339	0.019335	#ERROR!
LINC01558	THAP9-AS1	0.196296	9.41e-06	0.493668	8.22e-05	2.33818	0.019378	#ERROR!
LINC01352	THAP9-AS1	0.139457	0.001736	0.448083	0.00042	2.33754	0.019411	#ERROR!
COL6A3	THAP9-AS1	-0.02308	0.605951	0.308293	0.01855	2.33626	0.019478	0/+
PPDPFL	THAP9-AS1	-0.06692	0.134292	0.267977	0.041973	2.33603	0.01949	0/+
NKAPL	THAP9-AS1	0.09817	0.027852	0.413732	0.001245	2.33542	0.019521	#ERROR!
PGRMC2	THAP9-AS1	0.325465	7.51e-14	0.591024	1.04e-06	2.33455	0.019567	#ERROR!
SLC25A16	THAP9-AS1	0.340604	4.22e-15	0.601984	5.78e-07	2.33446	0.019572	#ERROR!
MRPL42P6	THAP9-AS1	-0.03894	0.383972	0.293518	0.025338	2.33373	0.01961	0/+
CAPN11	THAP9-AS1	0.263266	2.1e-09	-0.07157	0.593438	-2.33327	0.019634	#ERROR!
RAB7A	THAP9-AS1	0.363253	0	0.618032	2.35e-07	2.33247	0.019676	#ERROR!
PCDHGB1	THAP9-AS1	0.099205	0.026238	0.413912	0.001239	2.32976	0.019819	#ERROR!
SLC13A1	THAP9-AS1	0.024262	0.587589	0.349563	0.007152	2.329	0.019859	0/+
KRT18P64	THAP9-AS1	0.051232	0.251891	-0.28157	0.032255	-2.3289	0.019864	0/-
SMAD1	THAP9-AS1	0.241744	4.15e-08	0.52794	2.05e-05	2.32886	0.019866	#ERROR!
EGF	THAP9-AS1	0.228707	2.22e-07	0.517912	3.13e-05	2.32885	0.019867	#ERROR!
HAPLN1	THAP9-AS1	0.206331	3.14e-06	-0.13031	0.329583	-2.32701	0.019965	#ERROR!
FMO1	THAP9-AS1	0.106676	0.016804	0.419722	0.001039	2.32621	0.020007	#ERROR!
GPR161	THAP9-AS1	0.031118	0.486655	0.355171	0.006222	2.32586	0.020026	0/+
COL1A2	THAP9-AS1	-0.07911	0.076579	0.255014	0.053369	2.32467	0.02009	0/0
ANKS6	THAP9-AS1	0.274451	3.99e-10	0.552242	6.99e-06	2.32388	0.020132	#ERROR!
BRIX1	THAP9-AS1	0.346748	1.33e-15	0.605328	4.81e-07	2.32279	0.02019	#ERROR!
RPL31P50	THAP9-AS1	0.057416	0.199041	-0.27499	0.036698	-2.32251	0.020206	0/-
CELSR1	THAP9-AS1	0.135483	0.00235	0.443029	0.000496	2.32212	0.020227	#ERROR!
FBXW11P1	THAP9-AS1	0.289778	3.62e-11	0.563528	4.11e-06	2.32206	0.02023	#ERROR!
NARS2	THAP9-AS1	0.319284	2.33e-13	0.585305	1.4e-06	2.32192	0.020237	#ERROR!
RPL3P4	THAP9-AS1	0.115802	0.009408	-0.21964	0.097595	-2.32164	0.020252	#ERROR!
GSG1L	THAP9-AS1	-0.00947	0.832353	0.318565	0.014803	2.32108	0.020282	0/+
MIR3936	THAP9-AS1	0.454877	0	0.680577	4.17e-09	2.31995	0.020343	#ERROR!
RNU6-4P	THAP9-AS1	0.133102	0.002808	-0.20249	0.127417	-2.31903	0.020393	#ERROR!
FBXW11	THAP9-AS1	0.224143	3.89e-07	0.513297	3.78e-05	2.31876	0.020408	#ERROR!
PORCN	THAP9-AS1	0.240915	4.63e-08	0.526156	2.22e-05	2.31799	0.02045	#ERROR!
PTPRK	THAP9-AS1	0.127569	0.004199	0.435992	0.000624	2.31754	0.020474	#ERROR!
SLC36A4	THAP9-AS1	0.394135	0	0.63852	6.94e-08	2.31741	0.020481	#ERROR!
KLF5	THAP9-AS1	0.18797	2.25e-05	0.484596	0.000116	2.31575	0.020572	#ERROR!
C9orf129	THAP9-AS1	0.052003	0.244821	0.37194	0.004042	2.31495	0.020616	0/+
KRTAP7-1	THAP9-AS1	0.065636	0.141963	-0.26627	0.043349	-2.31461	0.020634	0/-
RNA5SP248	THAP9-AS1	-0.00922	0.836745	0.3179	0.015024	2.31431	0.020651	0/+
ALDH8A1	THAP9-AS1	0.227439	2.59e-07	0.515362	3.48e-05	2.31421	0.020656	#ERROR!
FAF1	THAP9-AS1	0.270339	7.42e-10	0.548142	8.43e-06	2.31405	0.020665	#ERROR!
KRT33A	THAP9-AS1	-0.07509	0.092854	0.257124	0.051359	2.31243	0.020754	0/0
DSG4	THAP9-AS1	-0.08501	0.056981	0.247693	0.060843	2.31186	0.020785	0/0
H2BC9	THAP9-AS1	0.306573	2.19e-12	-0.02136	0.87356	-2.31151	0.020805	#ERROR!
HDGF	THAP9-AS1	0.234716	1.04e-07	0.52061	2.8e-05	2.3107	0.020849	#ERROR!
OR5B21	THAP9-AS1	0.027371	0.540644	0.349856	0.007101	2.31001	0.020887	0/+
DSP	THAP9-AS1	0.062135	0.164522	0.379999	0.003259	2.30961	0.02091	0/+
EDNRA	THAP9-AS1	0.039045	0.382679	0.359984	0.00551	2.30933	0.020925	0/+
DOCK7	THAP9-AS1	0.146306	0.001011	0.450327	0.00039	2.30896	0.020946	#ERROR!
EPS8	THAP9-AS1	0.136285	0.002212	0.442137	0.000511	2.30895	0.020947	#ERROR!
ITIH6	THAP9-AS1	0.079653	0.074579	0.394877	0.002158	2.30892	0.020948	0/+
MYH8	THAP9-AS1	-0.05094	0.254631	0.27906	0.033894	2.30825	0.020985	0/+
DDX39A	THAP9-AS1	0.286502	6.12e-11	-0.04282	0.749608	-2.30793	0.021003	#ERROR!
RNA5SP467	THAP9-AS1	0.167148	0.000168	0.46707	0.000219	2.30785	0.021008	#ERROR!
SNX25	THAP9-AS1	0.253598	8.3e-09	0.5347	1.53e-05	2.30692	0.021059	#ERROR!
STAU1	THAP9-AS1	0.319639	2.18e-13	0.584072	1.49e-06	2.30641	0.021088	#ERROR!
LOC283856	THAP9-AS1	0.16049	0.000306	0.461494	0.000266	2.30602	0.02111	#ERROR!
POU3F3	THAP9-AS1	-0.06052	0.175755	0.269846	0.040509	2.30587	0.021118	0/+
LINC00511	THAP9-AS1	-0.06758	0.130489	0.26323	0.045888	2.30564	0.021131	0/+
MAPK1	THAP9-AS1	0.167015	0.00017	0.466685	0.000222	2.30541	0.021143	#ERROR!
PROM1	THAP9-AS1	-0.07697	0.084939	0.254341	0.054023	2.30499	0.021167	0/0
SCN4B	THAP9-AS1	0.235336	9.57e-08	0.520457	2.82e-05	2.30477	0.021179	#ERROR!
RPL35P5	THAP9-AS1	0.152077	0.000629	-0.18181	0.171982	-2.30464	0.021187	#ERROR!
LINC01909	THAP9-AS1	0.121298	0.006509	0.429272	0.000772	2.30458	0.02119	#ERROR!
GDF6	THAP9-AS1	0.113213	0.011136	0.42253	0.000953	2.30431	0.021205	#ERROR!
EPB41L1	THAP9-AS1	0.222524	4.74e-07	0.510459	4.25e-05	2.30412	0.021216	#ERROR!
ATP8B4	THAP9-AS1	0.059252	0.185036	0.376809	0.003551	2.30395	0.021226	0/+
RPL21P91	THAP9-AS1	0.012776	0.775226	-0.31333	0.016621	-2.30395	0.021226	0/-
BRINP2	THAP9-AS1	-0.15711	0.00041	0.176681	0.184595	2.30372	0.021238	-/0
MYADML2	THAP9-AS1	0.234638	1.05e-07	-0.0975	0.466547	-2.30318	0.021269	#ERROR!
RASSF8	THAP9-AS1	0.172403	0.000104	0.470746	0.000192	2.30307	0.021275	#ERROR!
RAB40AL	THAP9-AS1	0.246077	2.33e-08	0.528521	2e-05	2.30288	0.021286	#ERROR!
EGFR	THAP9-AS1	0.139201	0.00177	0.443768	0.000485	2.30249	0.021307	#ERROR!
FLRT2	THAP9-AS1	0.145827	0.00105	0.449151	0.000405	2.30222	0.021323	#ERROR!
MTCO1P12	THAP9-AS1	0.183105	3.67e-05	0.479205	0.000141	2.3022	0.021324	#ERROR!
PASD1	THAP9-AS1	0.079598	0.074781	-0.25147	0.056885	-2.30215	0.021327	0/0
ARPP19	THAP9-AS1	0.319003	2.45e-13	0.583149	1.56e-06	2.30169	0.021353	#ERROR!
LINC00927	THAP9-AS1	0.008767	0.844664	0.332323	0.010813	2.30159	0.021358	0/+
CBX3	THAP9-AS1	0.328592	4.2e-14	0.590018	1.09e-06	2.30005	0.021445	#ERROR!
EFHD1	THAP9-AS1	0.182218	4.01e-05	0.478221	0.000147	2.29974	0.021463	#ERROR!
SLCO3A1	THAP9-AS1	0.220506	6.05e-07	0.508398	4.61e-05	2.2996	0.021471	#ERROR!
H2BC8	THAP9-AS1	0.343451	2.44e-15	0.021731	0.871374	-2.29883	0.021515	#ERROR!
NCBP2L	THAP9-AS1	0.001547	0.97241	0.325515	0.012653	2.29876	0.021519	0/+
GAREM1	THAP9-AS1	0.101542	0.022888	0.411997	0.001312	2.29784	0.021571	#ERROR!
RNU6-1331P	THAP9-AS1	0.073809	0.098564	0.388519	0.00258	2.29777	0.021575	0/+
MTCO2P8	THAP9-AS1	-0.00872	0.845534	0.316096	0.015638	2.29716	0.02161	0/+
IFI27	THAP9-AS1	0.07106	0.111798	-0.25876	0.049848	-2.2967	0.021636	0/-
COL5A2	THAP9-AS1	0.057087	0.201639	0.373975	0.00383	2.29625	0.021662	0/+
RIN2	THAP9-AS1	0.111971	0.01206	0.42045	0.001016	2.29562	0.021697	#ERROR!
CD1D	THAP9-AS1	0.323252	1.13e-13	-0.000446	0.997348	-2.2951	0.021727	#ERROR!
ITGAV	THAP9-AS1	0.146158	0.001023	0.448567	0.000413	2.2949	0.021739	#ERROR!
POU2F3	THAP9-AS1	0.118404	0.007916	0.425706	0.000864	2.29481	0.021744	#ERROR!
RTN4RL2	THAP9-AS1	0.170798	0.00012	0.468439	0.000209	2.29414	0.021783	#ERROR!
LOC101930275	THAP9-AS1	0.353437	4.44e-16	0.607372	4.3e-07	2.29278	0.021861	#ERROR!
AHR	THAP9-AS1	-0.01254	0.779275	0.312046	0.017097	2.29257	0.021873	0/+
OPN1SW	THAP9-AS1	0.256016	5.92e-09	0.535015	1.51e-05	2.29226	0.02189	#ERROR!
GGCT	THAP9-AS1	0.039775	0.373841	0.35844	0.00573	2.29222	0.021893	0/+
PPP4R4	THAP9-AS1	0.115121	0.009838	0.422596	0.000951	2.29164	0.021926	#ERROR!
NRIP1	THAP9-AS1	0.012549	0.779114	0.334379	0.010305	2.29155	0.021932	0/+
GSTM5	THAP9-AS1	0.002686	0.952131	0.325571	0.012636	2.29141	0.02194	0/+
MFSD14A	THAP9-AS1	0.252983	9.04e-09	0.532585	1.68e-05	2.2912	0.021952	#ERROR!
MIR4316	THAP9-AS1	-0.03271	0.46463	0.293518	0.025338	2.29108	0.021958	0/+
IARS2	THAP9-AS1	0.205173	3.57e-06	0.495417	7.69e-05	2.29076	0.021977	#ERROR!
ADCY2	THAP9-AS1	0.060946	0.172764	0.376493	0.003581	2.2898	0.022033	0/+
ARMCX2	THAP9-AS1	0.328072	4.62e-14	0.588655	1.17e-06	2.28976	0.022035	#ERROR!
NPC1	THAP9-AS1	0.050671	0.257133	0.367552	0.004535	2.28932	0.022061	0/+
SHROOM3	THAP9-AS1	0.111863	0.012143	0.419503	0.001046	2.2885	0.022108	#ERROR!
ACOT12	THAP9-AS1	-0.00197	0.964913	0.320946	0.014033	2.28792	0.022142	0/+
MIEF2	THAP9-AS1	0.151646	0.000652	0.452196	0.000366	2.28767	0.022157	#ERROR!
CFAP161	THAP9-AS1	0.302946	4.08e-12	-0.02176	0.871191	-2.28693	0.0222	#ERROR!
BOC	THAP9-AS1	0.267524	1.13e-09	0.54322	1.05e-05	2.28688	0.022203	#ERROR!
AP3S1	THAP9-AS1	0.238196	6.61e-08	0.520711	2.79e-05	2.28644	0.022229	#ERROR!
OVCH1	THAP9-AS1	0.118435	0.0079	0.424703	0.000891	2.28623	0.022241	#ERROR!
MLXIP	THAP9-AS1	0.353709	4.44e-16	0.606931	4.4e-07	2.28588	0.022261	#ERROR!
STX7	THAP9-AS1	0.385315	0	0.629537	1.2e-07	2.28582	0.022265	#ERROR!
RGS6	THAP9-AS1	0.317468	3.23e-13	0.580451	1.79e-06	2.28548	0.022285	#ERROR!
ANKRD35	THAP9-AS1	-0.09456	0.034171	0.234912	0.075894	2.28486	0.022321	-/0
PCDHAC1	THAP9-AS1	-0.00729	0.870486	0.315659	0.015791	2.28411	0.022365	0/+
GHRH	THAP9-AS1	-0.08451	0.058464	0.244178	0.064719	2.28284	0.02244	0/0
SLC25A3P1	THAP9-AS1	0.059475	0.183385	0.374344	0.003793	2.2828	0.022442	0/+
DCUN1D3	THAP9-AS1	0.116671	0.008884	0.42279	0.000945	2.28252	0.022459	#ERROR!
TIE1	THAP9-AS1	0.300254	6.44e-12	0.567223	3.44e-06	2.28074	0.022564	#ERROR!
LOC105371083	THAP9-AS1	0.12727	0.00429	-0.2028	0.12681	-2.28073	0.022564	#ERROR!
SOGA3	THAP9-AS1	0.196656	9.06e-06	0.487568	0.000104	2.28069	0.022567	#ERROR!
BCL2L13	THAP9-AS1	0.268448	9.83e-10	0.543228	1.05e-05	2.28015	0.022599	#ERROR!
CCDC169	THAP9-AS1	0.144246	0.001192	0.44526	0.000461	2.28001	0.022607	#ERROR!
SNX9	THAP9-AS1	0.274648	3.87e-10	0.547773	8.57e-06	2.27862	0.02269	#ERROR!
LOC349160	THAP9-AS1	0.007179	0.872522	0.327902	0.011979	2.27853	0.022695	0/+
NDFIP2	THAP9-AS1	0.240033	5.2e-08	0.521234	2.73e-05	2.27803	0.022725	#ERROR!
BPI	THAP9-AS1	-0.10202	0.022247	0.226779	0.086918	2.27767	0.022746	-/0
C5orf15	THAP9-AS1	0.27868	2.09e-10	0.550634	7.52e-06	2.27678	0.0228	#ERROR!
EPPK1	THAP9-AS1	-0.0112	0.802397	0.311087	0.017459	2.27613	0.022838	0/+
LINC01529	THAP9-AS1	0.288926	4.15e-11	-0.03552	0.791217	-2.27604	0.022844	#ERROR!
KIAA1841	THAP9-AS1	0.36281	0	0.61254	3.22e-07	2.27553	0.022874	#ERROR!
RN7SL697P	THAP9-AS1	0.003322	0.94081	0.324011	0.013094	2.27513	0.022898	0/+
RSPO4	THAP9-AS1	-0.06733	0.131953	0.259299	0.049352	2.27504	0.022903	0/+
ABCB7	THAP9-AS1	0.209809	2.12e-06	0.497277	7.15e-05	2.27452	0.022935	#ERROR!
CRYZL2P	THAP9-AS1	0.250167	1.33e-08	0.52867	1.99e-05	2.27449	0.022936	#ERROR!
SEC14L4	THAP9-AS1	0.075539	0.090899	0.387086	0.002684	2.27435	0.022945	0/+
PRAC2	THAP9-AS1	0.017165	0.701226	-0.30543	0.019728	-2.27422	0.022953	0/-
NGF-AS1	THAP9-AS1	-0.08762	0.049769	0.239929	0.069668	2.27335	0.023005	-/0
OR2AK2	THAP9-AS1	0.207111	2.87e-06	-0.12178	0.362475	-2.27335	0.023005	#ERROR!
AUTS2	THAP9-AS1	0.103834	0.019969	0.410865	0.001357	2.27269	0.023045	#ERROR!
LINC01122	THAP9-AS1	0.113659	0.010819	0.419073	0.00106	2.2725	0.023056	#ERROR!
KLF1	THAP9-AS1	0.102761	0.021293	-0.2253	0.089059	-2.27208	0.023082	#ERROR!
MAPK8IP1P1	THAP9-AS1	0.057815	0.195933	0.371516	0.004087	2.27172	0.023103	0/+
ARHGAP10	THAP9-AS1	0.072401	0.105177	0.384029	0.00292	2.27136	0.023125	0/+
CCN4	THAP9-AS1	-0.11269	0.01152	0.215563	0.10414	2.27078	0.02316	-/0
IL13RA1	THAP9-AS1	0.161289	0.000285	0.45801	0.0003	2.27022	0.023194	#ERROR!
GSTCD	THAP9-AS1	0.181694	4.22e-05	0.474383	0.000169	2.2695	0.023238	#ERROR!
HSF2BP	THAP9-AS1	0.222655	4.66e-07	0.506695	4.94e-05	2.26847	0.0233	#ERROR!
DNAJC9	THAP9-AS1	0.325391	7.62e-14	0.584615	1.45e-06	2.26817	0.023319	#ERROR!
LINC01834	THAP9-AS1	0.042023	0.347418	0.357336	0.005893	2.26816	0.023319	0/+
NETO1	THAP9-AS1	0.023472	0.599819	0.340982	0.008811	2.2678	0.023342	0/+
PECR	THAP9-AS1	0.289859	3.57e-11	0.55814	5.31e-06	2.26771	0.023347	#ERROR!
SNX2	THAP9-AS1	0.292815	2.21e-11	0.560324	4.79e-06	2.26735	0.023369	#ERROR!
FAM180B	THAP9-AS1	0.041249	0.356379	0.356462	0.006024	2.26662	0.023414	0/+
PBK	THAP9-AS1	0.164741	0.00021	-0.16366	0.219604	-2.26559	0.023477	#ERROR!
OR7E136P	THAP9-AS1	0.00386	0.931243	0.32322	0.013331	2.26542	0.023487	0/+
RDXP1	THAP9-AS1	-0.04928	0.270394	0.274704	0.0369	2.26467	0.023533	0/+
NDNF	THAP9-AS1	0.048715	0.275974	0.362613	0.005152	2.26377	0.023589	0/+
EMB	THAP9-AS1	0.082767	0.063885	0.39194	0.002345	2.26374	0.02359	0/+
CYB5R2	THAP9-AS1	0.20197	5.09e-06	0.489863	9.51e-05	2.26348	0.023606	#ERROR!
TM4SF4	THAP9-AS1	-0.10403	0.019738	0.222758	0.092814	2.26256	0.023663	-/0
PDE5A	THAP9-AS1	0.00245	0.956341	0.321495	0.013861	2.2619	0.023704	0/+
TBX20	THAP9-AS1	-0.0617	0.167515	0.262699	0.046344	2.26133	0.023738	0/+
AGRP	THAP9-AS1	-0.05532	0.215966	0.268599	0.041481	2.26098	0.02376	0/+
PLAU	THAP9-AS1	-0.16995	0.00013	0.157702	0.237089	2.26041	0.023796	-/0
RNF130	THAP9-AS1	0.213517	1.38e-06	0.498616	6.79e-05	2.26016	0.023811	#ERROR!
KDSR	THAP9-AS1	0.246781	2.12e-08	0.524517	2.38e-05	2.25988	0.023828	#ERROR!
RAB11FIP5	THAP9-AS1	0.160964	0.000293	0.456534	0.000316	2.25973	0.023838	#ERROR!
SLC26A5	THAP9-AS1	0.274321	4.07e-10	0.545579	9.47e-06	2.25965	0.023843	#ERROR!
CCDC78	THAP9-AS1	0.356792	0	0.042647	0.750589	-2.25963	0.023844	#ERROR!
DSEL	THAP9-AS1	0.117575	0.008367	0.420777	0.001006	2.25951	0.023851	#ERROR!
DIAPH2	THAP9-AS1	0.154407	0.000517	0.451103	0.00038	2.25895	0.023887	#ERROR!
STEAP2	THAP9-AS1	0.133025	0.002824	0.433445	0.000677	2.25813	0.023937	#ERROR!
CACNA1S	THAP9-AS1	0.125714	0.00479	-0.20104	0.130217	-2.25736	0.023986	#ERROR!
MEGF9	THAP9-AS1	0.084633	0.058105	0.392734	0.002293	2.25731	0.023989	0/+
PLD1	THAP9-AS1	0.276628	2.86e-10	0.547012	8.87e-06	2.25654	0.024037	#ERROR!
FAM114A2	THAP9-AS1	0.383326	0	0.625527	1.52e-07	2.25654	0.024037	#ERROR!
BUB1B	THAP9-AS1	0.298288	8.95e-12	-0.02241	0.867368	-2.25638	0.024047	#ERROR!
PPP1CB	THAP9-AS1	0.303127	3.96e-12	0.566931	3.49e-06	2.25619	0.024059	#ERROR!
LOC101926934	THAP9-AS1	0.16329	0.000239	0.458012	0.0003	2.25618	0.024059	#ERROR!
CHODL	THAP9-AS1	-0.00116	0.979345	0.317407	0.01519	2.25544	0.024106	0/+
PC	THAP9-AS1	-0.01366	0.760072	0.306011	0.019485	2.25464	0.024156	0/+
RNU6-689P	THAP9-AS1	0.281743	1.3e-10	0.550618	7.53e-06	2.25391	0.024202	#ERROR!
TAB3	THAP9-AS1	0.292147	2.46e-11	0.558464	5.23e-06	2.25385	0.024206	#ERROR!
LRP10	THAP9-AS1	-0.00342	0.939023	0.315153	0.015968	2.2538	0.024209	0/+
MGAT4C	THAP9-AS1	0.162355	0.000259	0.456964	0.000311	2.25369	0.024216	#ERROR!
PLBD2	THAP9-AS1	0.22041	6.12e-07	0.503322	5.65e-05	2.25366	0.024217	#ERROR!
GRAMD1C	THAP9-AS1	0.306189	2.34e-12	0.568906	3.17e-06	2.25305	0.024256	#ERROR!
CAMK2N1	THAP9-AS1	-0.05432	0.224377	0.268415	0.041626	2.25278	0.024273	0/+
PRRG1	THAP9-AS1	0.126437	0.004551	0.427101	0.000827	2.25072	0.024403	#ERROR!
LOC100506691	THAP9-AS1	0.300109	6.59e-12	0.564116	4e-06	2.25059	0.024411	#ERROR!
RNA5SP200	THAP9-AS1	-0.07538	0.091589	0.248361	0.060127	2.25044	0.024421	0/0
CCDC15	THAP9-AS1	0.367976	0	0.613955	2.97e-07	2.25028	0.024431	#ERROR!
HMCN1	THAP9-AS1	0.102057	0.022201	0.406608	0.001539	2.25002	0.024448	#ERROR!
LINC01197	THAP9-AS1	0.187195	2.43e-05	0.476473	0.000156	2.24904	0.02451	#ERROR!
ITGBL1	THAP9-AS1	-0.06379	0.153513	0.259052	0.049577	2.24897	0.024514	0/+
SGPP2	THAP9-AS1	0.09272	0.037828	0.398554	0.001944	2.24876	0.024528	#ERROR!
LOC100508046	THAP9-AS1	0.042634	0.340442	-0.2787	0.034133	-2.2487	0.024531	0/-
DEFB123	THAP9-AS1	-0.05707	0.20175	0.265295	0.04415	2.24868	0.024533	0/+
FAM184A	THAP9-AS1	0.361009	0	0.608761	3.98e-07	2.24851	0.024544	#ERROR!
MFSD1	THAP9-AS1	0.257185	5.02e-09	0.531192	1.79e-05	2.2472	0.024627	#ERROR!
RN7SL451P	THAP9-AS1	0.137859	0.001962	-0.18765	0.158376	-2.24671	0.024658	#ERROR!
C11orf40	THAP9-AS1	0.052803	0.237625	-0.26889	0.041255	-2.24585	0.024714	0/-
SSX2IP	THAP9-AS1	0.223605	4.16e-07	0.50493	5.3e-05	2.24542	0.024741	#ERROR!
FLT4	THAP9-AS1	0.326745	5.93e-14	0.583333	1.54e-06	2.24451	0.0248	#ERROR!
AGPAT4	THAP9-AS1	0.256599	5.45e-09	0.530416	1.85e-05	2.24409	0.024826	#ERROR!
EEF1GP7	THAP9-AS1	0.115413	0.009652	0.417108	0.001125	2.24407	0.024828	#ERROR!
LOC100420424	THAP9-AS1	0.011701	0.793692	-0.30624	0.019388	-2.24297	0.024898	0/-
SMG1P7	THAP9-AS1	0.485209	0	0.199025	0.134196	-2.24272	0.024915	#ERROR!
TBC1D23	THAP9-AS1	0.310185	1.17e-12	0.570791	2.89e-06	2.24195	0.024965	#ERROR!
ITPRIPL2	THAP9-AS1	0.014536	0.745269	0.329647	0.011506	2.2416	0.024987	0/+
MIR3127	THAP9-AS1	0.143945	0.001221	0.440316	0.000542	2.24007	0.025087	#ERROR!
OR2AF1P	THAP9-AS1	0.09788	0.028318	-0.2255	0.08876	-2.23985	0.025101	#ERROR!
C6orf62	THAP9-AS1	0.340732	4e-15	0.593165	9.27e-07	2.23968	0.025112	#ERROR!
MTAP	THAP9-AS1	0.294814	1.59e-11	0.559001	5.1e-06	2.23924	0.025141	#ERROR!
TMEM130	THAP9-AS1	0.000363	0.993525	0.316547	0.015483	2.2385	0.025188	0/+
IGHVIII-67-4	THAP9-AS1	-0.03089	0.489824	-0.34355	0.008283	-2.23691	0.025292	0/-
PRPS2	THAP9-AS1	0.194097	1.19e-05	0.480559	0.000135	2.2363	0.025332	#ERROR!
EZR	THAP9-AS1	0.092684	0.037901	0.396924	0.002036	2.23576	0.025367	#ERROR!
LINC02516	THAP9-AS1	0.101641	0.022755	0.404488	0.001637	2.23555	0.025381	#ERROR!
RNU6-101P	THAP9-AS1	0.108321	0.01518	0.41009	0.001388	2.23529	0.025398	#ERROR!
ERG	THAP9-AS1	0.299647	7.13e-12	0.562187	4.38e-06	2.23475	0.025434	#ERROR!
DENND2C	THAP9-AS1	0.344149	2.22e-15	0.595195	8.32e-07	2.23467	0.025439	#ERROR!
ARPIN	THAP9-AS1	0.252968	9.06e-09	0.526617	2.17e-05	2.2346	0.025444	#ERROR!
RNU6-1089P	THAP9-AS1	0.100797	0.023913	0.403632	0.001679	2.23439	0.025458	#ERROR!
HMGXB3	THAP9-AS1	0.264692	1.71e-09	0.535591	1.48e-05	2.23416	0.025473	#ERROR!
RPL6P16	THAP9-AS1	0.004746	0.915534	-0.31136	0.017356	-2.23408	0.025478	0/-
OSBPL5	THAP9-AS1	0.248549	1.66e-08	0.523087	2.52e-05	2.23354	0.025513	#ERROR!
CRCT1	THAP9-AS1	-0.05259	0.239552	0.267403	0.042431	2.23344	0.02552	0/+
COL6A6	THAP9-AS1	0.258746	4.02e-09	0.530944	1.81e-05	2.23339	0.025523	#ERROR!
RN7SL181P	THAP9-AS1	0.227079	2.71e-07	0.506242	5.03e-05	2.23245	0.025585	#ERROR!
NEGR1	THAP9-AS1	0.190651	1.7e-05	0.477343	0.000151	2.23224	0.025599	#ERROR!
MYH7	THAP9-AS1	0.022575	0.613829	-0.29488	0.024634	-2.23196	0.025617	0/-
LOXL4	THAP9-AS1	0.148235	0.000864	0.442889	0.000499	2.23196	0.025618	#ERROR!
CAMK2D	THAP9-AS1	0.220359	6.15e-07	0.500831	6.23e-05	2.23125	0.025665	#ERROR!
FOXQ1	THAP9-AS1	0.002401	0.957202	0.317255	0.015241	2.22995	0.025751	0/+
FAM3D	THAP9-AS1	0.165598	0.000194	-0.15745	0.237864	-2.22799	0.025881	#ERROR!
AQP2	THAP9-AS1	0.028612	0.522439	0.340337	0.008948	2.22765	0.025904	0/+
DCLRE1B	THAP9-AS1	0.190238	1.78e-05	0.47645	0.000156	2.22726	0.02593	#ERROR!
CCDC120	THAP9-AS1	0.294211	1.76e-11	0.557234	5.54e-06	2.22621	0.026	#ERROR!
CDHR5	THAP9-AS1	0.173611	9.24e-05	0.462919	0.000253	2.22614	0.026005	#ERROR!
RPS25P3	THAP9-AS1	0.110982	0.012844	0.411169	0.001345	2.22576	0.026031	#ERROR!
EFCAB9	THAP9-AS1	0.105571	0.017978	-0.21605	0.103339	-2.22506	0.026077	#ERROR!
FLVCR2	THAP9-AS1	0.075844	0.089599	0.381178	0.003156	2.22487	0.02609	0/+
RAB7B	THAP9-AS1	-0.04194	0.348393	0.276086	0.035923	2.22457	0.02611	0/+
FAM71B	THAP9-AS1	0.022337	0.617587	-0.29403	0.025073	-2.22393	0.026153	0/-
MAP3K20-AS1	THAP9-AS1	0.069814	0.118237	0.375789	0.003649	2.22331	0.026195	0/+
ENOX2	THAP9-AS1	0.14306	0.00131	0.437598	0.000592	2.22323	0.0262	#ERROR!
LMBRD1	THAP9-AS1	0.273015	4.96e-10	0.540783	1.17e-05	2.22279	0.02623	#ERROR!
LSM10	THAP9-AS1	0.361867	0	0.053864	0.687992	-2.22261	0.026242	#ERROR!
PARD3	THAP9-AS1	0.111714	0.012259	0.411376	0.001336	2.22238	0.026257	#ERROR!
BHLHE40-AS1	THAP9-AS1	0.290034	3.47e-11	0.553597	6.56e-06	2.22146	0.02632	#ERROR!
GPR22	THAP9-AS1	0.149941	0.000751	0.442948	0.000498	2.22053	0.026383	#ERROR!
IGLON5	THAP9-AS1	0.02636	0.555708	0.337347	0.009608	2.21996	0.026421	0/+
FCF1P4	THAP9-AS1	0.016178	0.717661	0.328238	0.011887	2.21957	0.026448	0/+
SEPTIN7P12	THAP9-AS1	-0.03232	0.470009	0.284256	0.030578	2.21931	0.026466	0/+
AGAP11	THAP9-AS1	0.317347	3.3e-13	0.573862	2.49e-06	2.21886	0.026496	#ERROR!
RN7SL150P	THAP9-AS1	0.121221	0.006543	-0.19997	0.132317	-2.21855	0.026518	#ERROR!
OCSTAMP	THAP9-AS1	-0.06685	0.13473	-0.3726	0.003972	-2.21831	0.026533	0/-
RARRES2	THAP9-AS1	-0.13851	0.001867	0.182958	0.169234	2.21805	0.026552	-/0
ALOX15P2	THAP9-AS1	0.017091	0.702453	-0.29795	0.023112	-2.21744	0.026593	0/-
AP1G1	THAP9-AS1	0.325841	7.02e-14	0.580011	1.83e-06	2.21711	0.026616	#ERROR!
GPR149	THAP9-AS1	-0.04384	0.326958	0.273247	0.037953	2.21659	0.026651	0/+
BNIP3P40	THAP9-AS1	0.167575	0.000162	0.456808	0.000313	2.21565	0.026716	#ERROR!
PCDH9	THAP9-AS1	0.022282	0.618449	0.333062	0.010628	2.21486	0.02677	0/+
LTBP4	THAP9-AS1	0.223465	4.23e-07	0.501477	6.07e-05	2.21481	0.026773	#ERROR!
LINC01460	THAP9-AS1	-0.04369	0.328602	0.273064	0.038087	2.21422	0.026814	0/+
MPZL1	THAP9-AS1	0.121757	0.006307	0.418758	0.00107	2.21375	0.026846	#ERROR!
PPP1R9A	THAP9-AS1	0.192629	1.39e-05	0.476782	0.000155	2.21324	0.026881	#ERROR!
FREM1	THAP9-AS1	-0.03405	0.446522	0.281825	0.032094	2.21311	0.02689	0/+
ATP11A	THAP9-AS1	0.164054	0.000223	0.453642	0.000348	2.21311	0.02689	#ERROR!
LY6G6C	THAP9-AS1	-0.02662	0.55174	0.288645	0.027991	2.21305	0.026894	0/+
LMCD1-AS1	THAP9-AS1	0.173603	9.24e-05	0.461076	0.00027	2.21017	0.027093	#ERROR!
SNORA14A	THAP9-AS1	0.10207	0.022185	0.401647	0.001778	2.2094	0.027147	#ERROR!
RBBP4P4	THAP9-AS1	-0.03272	0.464527	0.282514	0.031657	2.20911	0.027167	0/+
RIOK3	THAP9-AS1	0.36814	0	0.61025	3.66e-07	2.20848	0.027211	#ERROR!
PPP2R3A	THAP9-AS1	0.112165	0.011911	0.410063	0.00139	2.20847	0.027212	#ERROR!
CST1	THAP9-AS1	-0.14102	0.001537	0.179101	0.178559	2.20829	0.027224	-/0
LOC91370	THAP9-AS1	0.031111	0.486752	0.33998	0.009024	2.20779	0.027259	0/+
ANKRD26P4	THAP9-AS1	0.184313	3.25e-05	0.469457	0.000201	2.20765	0.027268	#ERROR!
SNHG9	THAP9-AS1	0.31065	1.08e-12	-0.00158	0.990582	-2.20711	0.027307	#ERROR!
RNA5SP77	THAP9-AS1	0.021809	0.625922	0.331616	0.010992	2.20698	0.027315	0/+
GALNT12	THAP9-AS1	0.173542	9.3e-05	0.460547	0.000275	2.20601	0.027383	#ERROR!
[truncated: 26,943 more rows]

## Sheet: UCEC
Gene1	Gene2	TCGA_UCEC.PrimarySolidTumor_cor	TCGA_UCEC.PrimarySolidTumor_pVal	TCGA_UCEC.SolidTissueNormal_cor	TCGA_UCEC.SolidTissueNormal_pVal	zScoreDiff	pValDiff	Classes
[truncated: 27,513 more rows]
