# Supplementary material for: Pan-Cancer Analysis Reveals the Prognostic Potential of the THAP9/THAP9-AS1 Sense–Antisense Gene Pair in Human Cancers
Source: Noncoding RNA. 2022 Jul 8;8(4):51. doi: 10.3390/ncrna8040051 (PMC9326536; doi:10.3390/ncrna8040051)
Supplement: Supplementary file 1 [file ncrna-08-00051-s001.zip › Supplementary_Tables S1-S7.xlsx]

## Sheet: Supplementary Table S1
>FP007101 THAP9_1 :+U EU:NC; range -250 to 250.
atgggtgaaaacagaaggaaaataaaccggttgcagcaaaacccactatt
ccgcctccaacgcggagggaggagcggtcaaatgcacgtcttcaggctca
ggcccttccgattggctgctgggacacaacgtggcctgtcattggctacg
gcaccggcgcagggccttcggagaggaagtgtggaagtcccgcgcctcta
aagcccgcctttcgtgacaaataaaggtcgtagccgcagagtcaacgggc
GGAGCTAAAGTGGTCGTGATTCATGCTGTCGCGGGAACCCCGAAGGTGGG
GCCCCACGTAACAAGAAGATGACCCGAAGTTGCTCCGCAGTGGGCTGCAG
CACCCGTGACACCGTGCTCAGCCGGGAGCGCGGCCTCTCCTTCCACCAGT
GCGTATGGGAGCAGCCTCGAAGCCTTCGAACTCCCTGCGGGGCCCGGCGG
GCCGTGGCGTGGCGTGGGGCGGGGCCGGGCCGCACTGTGGGTCGCGCCGCG
A possible combination, input sequence position 98 to 133:
tcaggcccttccgattggctgctgggacacaacgt
A possible combination, input sequence position 357 to 392:
TGACACCGTGCTCAGCCGGGAGCGCGGCCTCTCCT
A possible combination, input sequence position 330 to 365:
TTGCTCCGCAGTGGGCTGCAGCACCCGTGACACCG
A possible combination, input sequence position 51 to 86:
ccgcctccaacgcggagggaggagcggtcaaatgc
A possible combination, input sequence position 426 to 461:
TCGAACTCCCTGCGGGGCCCGGCGGGCCGTGGCGT
A possible combination, input sequence position 108 to 143:
ccgattggctgctgggacacaacgtggcctgtcat
A possible combination, input sequence position 146 to 181:
ctacggcaccggcgcagggccttcggagaggaagt
Element	Start position	Sequence	PWM score	Consensus Match
BRE upstream	190	ccgcgcc	0.7334	7 out of 7
BRE upstream	203	gcccgcc	0.3472	6 out of 7
BRE upstream	447	GCGGGCC	0.1461	6 out of 7
BRE upstream	475	CCGGGCC	0.1071	6 out of 7
BRE upstream	378	GCGCGGC	0.0617	6 out of 7
BRE upstream	470	CGGGGCC	0.0545	6 out of 7
BRE upstream	438	CGGGGCC	0.0545	6 out of 7
BRE upstream	418	CGAAGCC	0.0531	6 out of 7
GAGA	374	GGGAGCGCGG	0.0382	NA
GAGA	169	cggagaggaa	0.0197	NA
Mammalian Initiator	396	CCAGTGC	0.2344	6 out of 7
Mammalian Initiator	46	ctattcc	0.2143	7 out of 7
Mammalian Initiator	43	ccactat	0.15	6 out of 7
Mammalian Initiator	98	tcaggcc	0.1364	6 out of 7
Bridge 1	117	tgctg	0.1045	2 out of 5
Bridge 2	129	acgt	0.1045	4 out of 4
Mammalian Initiator	92	tcaggct	0.0818	6 out of 7
Mammalian Initiator	271	TCATGCT	0.0655	6 out of 7
Mammalian Initiator	78	tcaaatg	0.0591	6 out of 7
Mammalian Initiator	57	ccaacgc	0.0369	5 out of 7
Mammalian Initiator	304	CCACGTA	0.0364	5 out of 7
Mammalian Initiator	480	CCGCACT	0.0303	6 out of 7
Mammalian Initiator	139	tcattgg	0.03	5 out of 7
Mammalian Initiator	368	TCAGCCG	0.0273	5 out of 7
Mammalian Initiator	198	ctaaagc	0.0264	6 out of 7
Mammalian Initiator	37	caaaacc	0.0264	6 out of 7
Mammalian Initiator	357	TGACACC	0.026	6 out of 7
DPE	386	TCTCCT	0.0118	6 out of 6
Bridge 1	376	GAGCG	0.0352	1 out of 5
Bridge 2	388	TCCT	0.0352	3 out of 4
Mammalian Initiator	330	TTGCTCC	0.0254	6 out of 7
DPE	359	ACACCG	0.0342	5 out of 6
Bridge 1	349	AGCAC	0.0246	3 out of 5
Bridge 2	361	ACCG	0.0246	2 out of 4
Mammalian Initiator	27	ccggttg	0.0208	5 out of 7
Mammalian Initiator	190	ccgcgcc	0.0202	5 out of 7
Mammalian Initiator	51	ccgcctc	0.0202	5 out of 7
Bridge 1	70	aggag	0.0374	2 out of 5
Bridge 2	82	atgc	0.0374	3 out of 4
Mammalian Initiator	426	TCGAACT	0.0197	6 out of 7
Bridge 1	445	CGGCG	0.0152	3 out of 5
Bridge 2	457	GCGT	0.0152	3 out of 4
Mammalian Initiator	475	CCGGGCC	0.0189	5 out of 7
Mammalian Initiator	84	gcacgtc	0.0182	5 out of 7
Mammalian Initiator	108	ccgattg	0.0181	5 out of 7
DPE	137	tgtcat	0.0111	6 out of 6
Bridge 1	127	caacg	0.0263	3 out of 5
Bridge 2	139	tcat	0.0263	3 out of 4
Mammalian Initiator	492	TCGCGCC	0.0162	5 out of 7
Mammalian Initiator	255	CTAAAGT	0.0158	6 out of 7
Mammalian Initiator	482	GCACTGT	0.015	5 out of 7
Mammalian Initiator	79	caaatgc	0.0145	5 out of 7
Mammalian Initiator	146	ctacggc	0.013	5 out of 7
DPE	175	ggaagt	0.072	5 out of 6
Bridge 1	165	ccttc	0.0232	3 out of 5
Bridge 2	177	aagt	0.0232	3 out of 4
Mammalian Initiator	205	ccgcctt	0.0121	5 out of 7
Mammalian Initiator	124	acacaac	0.0114	5 out of 7
Mammalian Initiator	22	ataaacc	0.0106	6 out of 7
Mammalian Initiator	427	CGAACTC	0.0106	5 out of 7
Mammalian Initiator	418	CGAAGCC	0.0106	5 out of 7
Mammalian Initiator	411	GCAGCCT	0.0102	5 out of 7
BBCABW Initiator	336	CGCAGT	0.7506	6 out of 6
BBCABW Initiator	138	gtcatt	0.7495	6 out of 6
BBCABW Initiator	42	cccact	0.6985	6 out of 6
BBCABW Initiator	235	cgcaga	0.6455	6 out of 6
BBCABW Initiator	481	CGCACT	0.5389	6 out of 6
BBCABW Initiator	395	ACCAGT	0.1892	5 out of 6
BBCABW Initiator	367	CTCAGC	0.1101	5 out of 6
Human TCT	384	CCTCTCC	0.319	7 out of 7
Human TCT	103	cccttcc	0.1195	6 out of 7
Human TCT	386	TCTCCTT	0.1106	6 out of 7
Human TCT	388	TCCTTCC	0.1099	6 out of 7
TFIIA response element	459	GTGGCGTGGG	0.1948	9 out of 10
TFIIA response element	356	GTGACACCGT	0.1008	8 out of 10

## Sheet: Supplementary Table S2
>FP000621 THAP9-AS1_1 :+U EU:NC; range -400 to 100.
gtgcggcccggccccgccccacgccacgccacggcccgccgggccccgca
gggagttcgaaggcttcgaggctgctcccatacgcactggtggaaggaga
ggccgcgctcccggctgagcacggtgtcacgggtgctgcagcccactgcg
gagcaacttcgggtcatcttcttgttacgtggggccccaccttcggggtt
cccgcgacagcatgaatcacgaccactttagctccgcccgttgactctgc
ggctacgacctttatttgtcacgaaaggcgggctttagaggcgcgggact
tccacacttcctctccgaaggccctgcgccggtgccgtagccaatgacag
gccacgttgtgtcccagcagccaatcggaagggcctgagcctgaagacgt
GCATTTGACCGCTCCTCCCTCCGCGTTGGAGGCGGAATAGTGGGTTTTGC
TGCAACCGGTTTATTTTCCTTCTGTTTTCACCCATTCTGGCACAATCTGGC
A possible combination, input sequence position 352 to 387:
ccacgttgtgtcccagcagccaatcggaagggcct
A possible combination, input sequence position 304 to 339:
acacttcctctccgaaggccctgcgccggtgccgt
A possible combination, input sequence position 78 to 113:
ccatacgcactggtggaaggagaggccgcgctccc
A possible combination, input sequence position 72 to 107:
ctgctcccatacgcactggtggaaggagaggccgc
A possible combination, input sequence position 138 to 173:
gcagcccactgcggagcaacttcgggtcatcttct
A possible combination, input sequence position 401 to 436:
GCATTTGACCGCTCCTCCCTCCGCGTTGGAGGCGG
A possible combination, input sequence position 77 to 113:
cccatacgcactggtggaaggagaggccgcgctccc
A possible combination, input sequence position 400 to 436:
tGCATTTGACCGCTCCTCCCTCCGCGTTGGAGGCGG
Element	Start position	Sequence	PWM score	Consensus Match
BRE upstream	24	ccacgcc	0.3741	7 out of 7
BRE upstream	19	ccacgcc	0.3741	7 out of 7
BRE upstream	34	gcccgcc	0.3472	6 out of 7
BRE upstream	12	ccccgcc	0.2546	6 out of 7
BRE upstream	39	ccgggcc	0.1071	6 out of 7
BRE upstream	103	ccgcgct	0.0904	6 out of 7
BRE downstream	440	GTGGGTT	0.6931	7 out of 7
BRE downstream	356	gttgtgt	0.5349	7 out of 7
Mammalian Initiator	223	ccacttt	0.6	7 out of 7
Mammalian Initiator	482	CCATTCT	0.4501	7 out of 7
Mammalian Initiator	302	ccacact	0.2727	7 out of 7
Mammalian Initiator	143	ccactgc	0.25	6 out of 7
Mammalian Initiator	24	ccacgcc	0.1818	6 out of 7
Mammalian Initiator	19	ccacgcc	0.1818	6 out of 7
Mammalian Initiator	371	ccaatcg	0.1625	6 out of 7
Mammalian Initiator	409	CCGCTCC	0.1111	6 out of 7
Mammalian Initiator	352	ccacgtt	0.1091	6 out of 7
DPE	381	gggcct	0.0116	5 out of 6
Mammalian Initiator	187	ccacctt	0.1091	6 out of 7
Mammalian Initiator	461	TTATTTT	0.1029	7 out of 7
Mammalian Initiator	304	acacttc	0.1	6 out of 7
DPE	333	tgccgt	0.0134	5 out of 6
Bridge 1	323	cctgc	0.0417	3 out of 5
Bridge 2	335	ccgt	0.0417	3 out of 4
Mammalian Initiator	154	caacttc	0.0714	6 out of 7
Mammalian Initiator	78	ccatacg	0.0682	6 out of 7
DPE	107	gctccc	0.0157	6 out of 6
Mammalian Initiator	164	tcatctt	0.0655	6 out of 7
Mammalian Initiator	456	CCGGTTT	0.0625	6 out of 7
Mammalian Initiator	492	ACAATCT	0.0487	6 out of 7
Mammalian Initiator	29	ccacggc	0.0455	5 out of 7
Mammalian Initiator	341	ccaatga	0.0406	5 out of 7
Mammalian Initiator	228	ttagctc	0.039	6 out of 7
Mammalian Initiator	217	tcacgac	0.0364	5 out of 7
Mammalian Initiator	262	ttatttg	0.0343	6 out of 7
Mammalian Initiator	242	tgactct	0.0343	6 out of 7
Mammalian Initiator	72	ctgctcc	0.0317	6 out of 7
DPE	101	ggccgc	0.0179	5 out of 6
Mammalian Initiator	478	TCACCCA	0.0291	5 out of 7
Mammalian Initiator	329	ccggtgc	0.026	5 out of 7
Mammalian Initiator	14	ccgcccc	0.0202	5 out of 7
Mammalian Initiator	39	ccgggcc	0.0189	5 out of 7
Mammalian Initiator	8	ccggccc	0.0189	5 out of 7
Mammalian Initiator	347	acaggcc	0.017	5 out of 7
Mammalian Initiator	138	gcagccc	0.017	5 out of 7
DPE	167	tcttct	0.0108	6 out of 6
Bridge 1	157	cttcg	0.0545	2 out of 5
Bridge 2	169	ttct	0.0545	3 out of 4
Mammalian Initiator	159	tcgggtc	0.0152	5 out of 7
Mammalian Initiator	401	GCATTTG	0.015	5 out of 7
DPE	430	AGGCGG	0.0122	4 out of 6
Mammalian Initiator	472	CTGTTTT	0.0143	6 out of 7
Mammalian Initiator	253	ctacgac	0.013	5 out of 7
Mammalian Initiator	421	CCGCGTT	0.0121	5 out of 7
Mammalian Initiator	103	ccgcgct	0.0121	5 out of 7
Mammalian Initiator	105	gcgctcc	0.0111	5 out of 7
BBCABW Initiator	481	CCCATT	0.7734	6 out of 6
BBCABW Initiator	142	cccact	0.6985	6 out of 6
BBCABW Initiator	77	cccata	0.6651	6 out of 6
DPE	107	gctccc	0.0157	6 out of 6
BBCABW Initiator	83	cgcact	0.5389	6 out of 6
BBCABW Initiator	489	GGCACA	0.4763	6 out of 6
BBCABW Initiator	301	tccaca	0.3504	6 out of 6
BBCABW Initiator	400	tGCATT	0.348	6 out of 6
DPE	430	AGGCGG	0.0122	4 out of 6
BBCABW Initiator	222	accact	0.1358	5 out of 6
BBCABW Initiator	363	cccagc	0.1168	5 out of 6
Human TCT	310	cctctcc	0.319	7 out of 7
Human TCT	167	tcttctt	0.1346	6 out of 7
Human TCT	467	TCCTTCT	0.1011	6 out of 7
XCPE 2	236	gcccgttgact	0.0101	10 out of 11

## Sheet: Supplementary Table S3
Study of Origin	Sample ID	Cancer Type	Cancer Type Detailed	Protein Change	Annotation	Functional Impact	Mutation Type	Variant Type	Copy #	COSMIC	MS	VS	Center	Chromosome	Start Pos	End Pos	Ref	Var	HGVSg	HGVSc	Allele Freq (T)	Allele Freq (N)	Variant Reads	Ref Reads	Variant Reads (Normal)	Ref Reads (Normal)	# Mut in Sample	Exon	gnomAD	ClinVar	dbSNP	Age at Diagnosis	Alcohol	Alcohol History Intensity	Primary Ancestry	Cellularity	First Therapy Response	First Therapy	Grade	Histology	Histology Abbreviation	Histology Tier1	Histology Tier2	Histology Tier3	Histology Tier4	ICD-10 Classification	ICGC Sample ID	Oncotree Code	Organ System
Pan-cancer analysis of whole genomes (ICGC/TCGA, Nature 2020)	SP81440	Colorectal Cancer	Colorectal Adenocarcinoma	N476T	OncoKB: NA;CIViC: NA;MyCancerGenome: not present;CancerHotspot: no;3DHotspot: no	MutationAssessor: NA;SIFT: impact: deleterious, score: 0;Polyphen-2: impact: probably_damaging, score: 0.984	Missense_Mutation	SNP	Diploid	1	NA	NA	NA	4	83838792	83838792	A	C	4:g.83838792A>C	ENST00000302236.5:c.1427A>C	0.18		6	28			70	2022-05-05				68			EUR					Adenocarcinoma, NOS	ColoRect-AdenoCA	ENDODERM	Colon/Rectum	Adenocarcinoma	Adenocarcinoma	C20	SA422387	COADREAD	RECTUM
Pan-cancer analysis of whole genomes (ICGC/TCGA, Nature 2020)	SP21400	Colorectal Cancer	Mucinous Adenocarcinoma of the Colon and Rectum	R665Q	OncoKB: NA;CIViC: NA;MyCancerGenome: not present;CancerHotspot: no;3DHotspot: no	MutationAssessor: NA;SIFT: impact: tolerated, score: 0.19;Polyphen-2: impact: benign, score: 0	Missense_Mutation	SNP	Diploid	1	NA	NA	NA	4	83839359	83839359	G	A	4:g.83839359G>A	ENST00000302236.5:c.1994G>A	0.24		21	68			4890	2022-05-05				75			EUR					Mucinous adenocarcinoma	ColoRect-AdenoCA	ENDODERM	Colon/Rectum	Adenocarcinoma	Adenocarcinoma, mucinous	C18.0	SA105050	MACR	LARGE INTESTINE, (EXCL. APPENDIX)
Pan-cancer analysis of whole genomes (ICGC/TCGA, Nature 2020)	SP103894	Melanoma	Melanoma	I749T	OncoKB: NA;CIViC: NA;MyCancerGenome: not present;CancerHotspot: no;3DHotspot: no	MutationAssessor: NA;SIFT: impact: tolerated, score: 0.44;Polyphen-2: impact: benign, score: 0	Missense_Mutation	SNP	Gain	1	NA	NA	NA	4	83839611	83839611	T	C	4:g.83839611T>C	ENST00000302236.5:c.2246T>C	0.57		21	16			965	2022-05-05				48			EUR					Malignant melanoma, NOS	Skin-Melanoma	NEURAL_CREST	Skin	Melanoma	Malignant melanoma	C77.3	SA508988	MEL	SKIN
Pan-cancer analysis of whole genomes (ICGC/TCGA, Nature 2020)	SP30843	Head and Neck Cancer	Head and Neck Squamous Cell Carcinoma	K164E	OncoKB: NA;CIViC: NA;MyCancerGenome: not present;CancerHotspot: no;3DHotspot: no	MutationAssessor: NA;SIFT: impact: tolerated, score: 0.18;Polyphen-2: impact: benign, score: 0.151	Missense_Mutation	SNP	Diploid		NA	NA	NA	4	83827690	83827690	A	G	4:g.83827690A>G	ENST00000302236.5:c.490A>G	0.3		22	52			18	2022-05-03				35			EUR	84			2 - Moderately differentiated	Squamous cell carcinoma, NOS	Head-SCC	MESODERM	Head/Neck	Squamous cell carcinoma	Squamous cell carcinoma	C09.9	SA201581	HNSC	GUM, FLOOR OF MOUTH, & OTHER MOUTH
Pan-cancer analysis of whole genomes (ICGC/TCGA, Nature 2020)	SP80615	Colorectal Cancer	Colorectal Adenocarcinoma	L813I	OncoKB: NA;CIViC: NA;MyCancerGenome: not present;CancerHotspot: no;3DHotspot: no	MutationAssessor: NA;SIFT: impact: deleterious, score: 0.01;Polyphen-2: impact: benign, score: 0.005	Missense_Mutation	SNP	Diploid	1	NA	NA	NA	4	83839802	83839802	C	A	4:g.83839802C>A	ENST00000302236.5:c.2437C>A	0.27		21	57			12010	2022-05-05				57			EUR					Adenocarcinoma, NOS	ColoRect-AdenoCA	ENDODERM	Colon/Rectum	Adenocarcinoma	Adenocarcinoma	C20	SA426710	COADREAD	RECTUM
Pan-cancer analysis of whole genomes (ICGC/TCGA, Nature 2020)	SP115085	Mature B-Cell Neoplasms	Chronic Lymphocytic Leukemia/Small Lymphocytic Lymphoma	S889G	OncoKB: NA;CIViC: NA;MyCancerGenome: not present;CancerHotspot: no;3DHotspot: no	MutationAssessor: NA;SIFT: impact: tolerated_low_confidence, score: 0.05;Polyphen-2: impact: benign, score: 0.003	Missense_Mutation	SNP	Diploid		NA	NA	NA	4	83840030	83840030	A	G	4:g.83840030A>G	ENST00000302236.5:c.2665A>G	0.36		32	56			13	2022-05-05				60	Don't know/Not sure	Not Documented	EUR	95		No Treatment		Chronic lymphocytic leukemia/small lymphocytic lymphoma	Lymph-CLL	MESODERM	Lymphoid	Chronic lymphocytic leukemia	Chronic lymphocytic leukemia	C91.1	SA538992	CLLSLL	BLOOD, BONE MARROW, & HEMATOPOIETIC SYS
Pan-cancer analysis of whole genomes (ICGC/TCGA, Nature 2020)	SP111006	Esophagogastric Cancer	Esophageal Adenocarcinoma	G83Rfs*18	OncoKB: NA;CIViC: NA;MyCancerGenome: not present;CancerHotspot: no;3DHotspot: no	MutationAssessor: NA;SIFT: NA;Polyphen-2: NA	Frame_Shift_Ins	INS	ShallowDel	1	NA	NA	NA	4	83826048	83826049	-	A	4:g.83826048_83826049insA	ENST00000302236.5:c.246dup	0.27		13	35			187	2022-05-02				78	No	None	EUR			No Treatment		Adenocarcinoma, NOS	Eso-AdenoCA	ENDODERM	Esophagus	Adenocarcinoma	Adenocarcinoma	C15.5	SA528816	ESCA	ESOPHAGUS
Pan-cancer analysis of whole genomes (ICGC/TCGA, Nature 2020)	SP107084	Hepatobiliary Cancer	Hepatocellular Carcinoma	H440Y	OncoKB: NA;CIViC: NA;MyCancerGenome: not present;CancerHotspot: no;3DHotspot: no	MutationAssessor: NA;SIFT: impact: tolerated, score: 1;Polyphen-2: impact: benign, score: 0.069	Missense_Mutation	SNP	Diploid	1	NA	NA	NA	4	83838683	83838683	C	T	4:g.83838683C>T	ENST00000302236.5:c.1318C>T	0.31		15	33			70	2022-05-05				73			ASN	100				Hepatocellular carcinoma, NOS	Liver-HCC	ENDODERM	Liver	Hepatocellular carcinoma	Hepatocellular carcinoma	C22	SA515347	HCC	LIVER
Pan-cancer analysis of whole genomes (ICGC/TCGA, Nature 2020)	SP107121	Hepatobiliary Cancer	Hepatocellular Carcinoma	R423S	OncoKB: NA;CIViC: NA;MyCancerGenome: not present;CancerHotspot: no;3DHotspot: no	MutationAssessor: NA;SIFT: impact: deleterious, score: 0;Polyphen-2: impact: possibly_damaging, score: 0.549	Missense_Mutation	SNP	Diploid	2	NA	NA	NA	4	83838634	83838634	A	C	4:g.83838634A>C	ENST00000302236.5:c.1269A>C	0.34		20	38			137	2022-05-05				76			ASN	100				Hepatocellular carcinoma, NOS	Liver-HCC	ENDODERM	Liver	Hepatocellular carcinoma	Hepatocellular carcinoma	C22	SA515422	HCC	LIVER
Pan-cancer analysis of whole genomes (ICGC/TCGA, Nature 2020)	SP124425	Melanoma	Melanoma	S155F	OncoKB: NA;CIViC: NA;MyCancerGenome: not present;CancerHotspot: no;3DHotspot: no	MutationAssessor: NA;SIFT: impact: deleterious, score: 0.04;Polyphen-2: impact: possibly_damaging, score: 0.452	Missense_Mutation	SNP	Diploid		NA	NA	NA	4	83827664	83827664	C	T	4:g.83827664C>T	ENST00000302236.5:c.464C>T	0.08		6	71			467	2022-05-03				63	Don't know/Not sure	Not Documented	EUR	60	Unknown	Surgery		Malignant melanoma, NOS	Skin-Melanoma	NEURAL_CREST	Skin	Melanoma	Malignant melanoma	C43.9	SA557502	MEL	SKIN
Pan-cancer analysis of whole genomes (ICGC/TCGA, Nature 2020)	SP102015	Ovarian Cancer	Ovarian Epithelial Tumor	M161I	OncoKB: NA;CIViC: NA;MyCancerGenome: not present;CancerHotspot: no;3DHotspot: no	MutationAssessor: NA;SIFT: impact: tolerated, score: 0.39;Polyphen-2: impact: benign, score: 0.006	Missense_Mutation	SNP	Diploid	1	NA	NA	NA	4	83827683	83827683	G	A	4:g.83827683G>A	ENST00000302236.5:c.483G>A	0.13		9	63			133	2022-05-03				55			EUR	72				Adenocarcinoma, NOS	Ovary-AdenoCA	MESODERM	Ovary	Adenocarcinoma	Adenocarcinoma	C48.2	SA505657	OVT	OVARY
Pan-cancer analysis of whole genomes (ICGC/TCGA, Nature 2020)	SP111173	Esophagogastric Cancer	Esophageal Adenocarcinoma	Q621R	OncoKB: NA;CIViC: NA;MyCancerGenome: not present;CancerHotspot: no;3DHotspot: no	MutationAssessor: NA;SIFT: impact: deleterious, score: 0.01;Polyphen-2: impact: benign, score: 0.056	Missense_Mutation	SNP	Diploid		NA	NA	NA	4	83839227	83839227	A	G	4:g.83839227A>G	ENST00000302236.5:c.1862A>G	0.17		9	45			378	2022-05-05				61	Yes	Daily Drinker	EUR			No Treatment		Adenocarcinoma, NOS	Eso-AdenoCA	ENDODERM	Esophagus	Adenocarcinoma	Adenocarcinoma	C15.5	SA528991	ESCA	ESOPHAGUS
Pan-cancer analysis of whole genomes (ICGC/TCGA, Nature 2020)	SP124969	Mature B-cell lymphoma	Diffuse Large B-Cell Lymphoma, NOS	S860P	OncoKB: NA;CIViC: NA;MyCancerGenome: not present;CancerHotspot: no;3DHotspot: no	MutationAssessor: NA;SIFT: impact: tolerated, score: 0.2;Polyphen-2: impact: possibly_damaging, score: 0.879	Missense_Mutation	SNP	Diploid		NA	NA	NA	4	83839943	83839943	T	C	4:g.83839943T>C	ENST00000302236.5:c.2578T>C	0.37		13	22			199	2022-05-05				73	Don't know/Not sure	Not Documented	EUR		Complete Response	Other Therapy		ML, large B-cell, diffuse	Lymph-BNHL	MESODERM	Lymphoid	Mature B-cell lymphoma	Diffse large B-cell lymphoma	C83.3	SA557665	DLBCLNOS	LYMPH NODES
Pan-cancer analysis of whole genomes (ICGC/TCGA, Nature 2020)	SP56168	Lung Cancer	Lung Adenocarcinoma	E177*	OncoKB: NA;CIViC: NA;MyCancerGenome: not present;CancerHotspot: no;3DHotspot: no	MutationAssessor: NA;SIFT: NA;Polyphen-2: NA	Nonsense_Mutation	SNP	Diploid		NA	NA	NA	4	83827729	83827729	G	T	4:g.83827729G>T	ENST00000302236.5:c.529G>T	0.08		5	61			246	2022-05-03				79			EUR				G2	Adenocarcinoma, NOS	Lung-AdenoCA	ENDODERM	Lung	Adenocarcinoma	Adenocarcinoma, invasive	C34.3	SA295193	LUAD	LUNG & BRONCHUS
Pan-cancer analysis of whole genomes (ICGC/TCGA, Nature 2020)	SP23504	Esophagogastric Cancer	Esophageal Adenocarcinoma	H611Y	OncoKB: NA;CIViC: NA;MyCancerGenome: not present;CancerHotspot: no;3DHotspot: no	MutationAssessor: NA;SIFT: impact: tolerated, score: 0.15;Polyphen-2: impact: probably_damaging, score: 0.941	Missense_Mutation	SNP	Diploid	1	NA	NA	NA	4	83839196	83839196	C	T	4:g.83839196C>T	ENST00000302236.5:c.1831C>T	0.35		17	32			83	2022-05-05				76	No	None	EUR	95		No Treatment		Adenocarcinoma, NOS	Eso-AdenoCA	ENDODERM	Esophagus	Adenocarcinoma	Adenocarcinoma	C15.5	SA130925	ESCA	ESOPHAGUS
Pan-cancer analysis of whole genomes (ICGC/TCGA, Nature 2020)	SP59348	Mature B-cell lymphoma	Follicular lymphoma	T184Rfs*12	OncoKB: NA;CIViC: NA;MyCancerGenome: not present;CancerHotspot: no;3DHotspot: no	MutationAssessor: NA;SIFT: NA;Polyphen-2: NA	Frame_Shift_Del	DEL	Diploid		NA	NA	NA	4	83827750	83827751	AC	-	4:g.83827750_83827751del	ENST00000302236.5:c.551_552del	0.26		7	20			100	2022-05-03				74	Don't know/Not sure	Not Documented	EUR		Complete Response	Other Therapy		Follicular lymphoma, grade 1	Lymph-BNHL	MESODERM	Lymphoid	Mature B-cell lymphoma	Follicular lymphoma	C82.0	SA320938	FL	LYMPH NODES
Pan-cancer analysis of whole genomes (ICGC/TCGA, Nature 2020)	SP50173	Hepatobiliary Cancer	Hepatocellular Carcinoma	N201D	OncoKB: NA;CIViC: NA;MyCancerGenome: not present;CancerHotspot: no;3DHotspot: no	MutationAssessor: NA;SIFT: impact: tolerated, score: 0.3;Polyphen-2: impact: benign, score: 0.001	Missense_Mutation	SNP	Diploid	1	NA	NA	NA	4	83828958	83828958	A	G	4:g.83828958A>G	ENST00000302236.5:c.601A>G	0.23		10	34			57	2022-05-04				63			ASN	80				Hepatocellular carcinoma, NOS	Liver-HCC	ENDODERM	Liver	Hepatocellular carcinoma	Hepatocellular carcinoma	C22	SA270456	HCC	LIVER
Pan-cancer analysis of whole genomes (ICGC/TCGA, Nature 2020)	SP102897	Renal Cell Carcinoma	Renal Clear Cell Carcinoma	T184K	OncoKB: NA;CIViC: NA;MyCancerGenome: not present;CancerHotspot: no;3DHotspot: no	MutationAssessor: NA;SIFT: impact: tolerated, score: 0.11;Polyphen-2: impact: probably_damaging, score: 0.986	Missense_Mutation	SNP	Diploid	1	NA	NA	NA	4	83827751	83827751	C	A	4:g.83827751C>A	ENST00000302236.5:c.551C>A	0.27		17	47			361	2022-05-03				61			EUR					Clear cell adenocarcinoma, NOS	Kidney-RCC	MESODERM	Kidney	Renal cell carcinoma (proximal tubules)	Adenocarcinoma, clear cell type	C64	SA507314	CCRCC	KIDNEY
[truncated: 17 more columns]

## Sheet: Supplementary Table S4
project_id	Additional - New Primary	Additional Metastatic	Control Analyte	Metastatic	Primary Blood Derived Cancer - Peripheral Blood	Primary Solid Tumor	Recurrent Solid Tumor	Solid Tissue Normal
TCGA-ACC	0	0	0	0	0	77	0	0
TCGA-BLCA	0	0	0	0	0	407	0	19
TCGA-BRCA	0	0	0	7	0	192	0	113
TCGA-CESC	0	0	0	2	0	304	0	3
TCGA-CHOL	0	0	0	0	0	36	0	9
TCGA-COAD	0	0	0	1	0	478	1	41
TCGA-DLBC	0	0	0	0	0	48	0	0
TCGA-ESCA	0	0	0	1	0	161	0	11
TCGA-GBM	0	0	0	0	0	156	13	5
TCGA-HNSC	0	0	0	2	0	500	0	44
TCGA-KICH	0	0	0	0	0	65	0	24
TCGA-KIRC	1	0	0	0	0	538	0	72
TCGA-KIRP	1	0	0	0	0	288	0	32
TCGA-LAML	0	0	0	0	173	0	0	0
TCGA-LGG	0	0	0	0	0	511	18	0
TCGA-LIHC	0	0	0	0	0	371	3	50
TCGA-LUAD	0	0	0	0	0	533	2	59
TCGA-LUSC	0	0	0	0	0	502	0	49
TCGA-MESO	0	0	0	0	0	86	0	0
TCGA-OV	0	0	0	0	0	374	5	0
TCGA-PAAD	0	0	0	1	0	177	0	4
TCGA-PCPG	3	0	0	2	0	178	0	3
TCGA-PRAD	0	0	0	1	0	498	0	52
TCGA-READ	0	0	0	0	0	166	1	10
TCGA-SARC	0	0	0	1	0	259	3	2
TCGA-SKCM	0	1	0	367	0	103	0	1
TCGA-STAD	0	0	0	0	0	375	0	32
TCGA-TGCT	6	0	0	0	0	150	0	0
TCGA-THCA	0	0	0	8	0	502	0	58
TCGA-THYM	0	0	0	0	0	119	0	2
TCGA-UCEC	0	0	0	0	0	551	1	35
TCGA-UCS	0	0	0	0	0	56	0	0
TCGA-UVM	0	0	0	0	0	80	0	0

## Sheet: Supplementary Table S5
TCGA Cancer Type	Gene Ontology & KEGG Pathways	Sample Type	Top 10 Enriched terms
BLCA	BP	Normal	Transcription by RNA polymerase II	Regulation of transcription, DNA-templated	Regulation of nucleic acid-templated transcription	Regulation of RNA biosynthetic process	Transcription, DNA-templated	Nucleic acid-templated transcription	RNA biosynthetic process	Nucleobase-containing compound biosynthetic process	Heterocycle biosynthetic process
		Tumor	Transcription by RNA polymerase II	Regulation of transcription, DNA-templated	Regulation of nucleic acid-templated transcription	Regulation of RNA biosynthetic process	Transcription, DNA-templated	Nucleic acid-templated transcription	RNA biosynthetic process	Regulation of RNA metabolic process	Nucleobase-containing compound biosynthetic process
	CC	Normal
		Tumor	Dynein axonemal particle	Axonemal dynein complex	Axoneme	Ciliary plasm	Plasma membrane bounded cell projection cytoplasm	Motile cilium	Cytoplasmic region
	MF	Normal	DNA-binding transcription factor activity	DNA-binding transcription factor activity, RNA polymerase II-specific	Transcription regulatory region sequence-specific DNA binding	Regulatory region nucleic acid binding	Sequence-specific double-stranded DNA binding	RNA polymerase II cis-regulatory region sequence-specific DNA binding	Sequence-specific DNA binding	Double-stranded DNA binding	Transcription regulator activity
		Tumor	RNA polymerase II transcription regulatory region sequence-specific DNA binding	DNA-binding transcription factor activity	Transcription regulatory region sequence-specific DNA binding	DNA-binding transcription factor activity, RNA polymerase II-specific	Regulatory region nucleic acid binding	Sequence-specific double-stranded DNA binding	Sequence-specific DNA binding	Double-stranded DNA binding	Transcription regulator activity	DNA binding
	KEGG	Normal	Herpes simplex virus 1 infection
		Tumor	Herpes simplex virus 1 infection
BRCA	BP	Normal	Regulation of nucleobase-containing compound metabolic process	Regulation of RNA metabolic process	Regulation of cellular macromolecule biosynthetic process	Regulation of macromolecule biosynthetic process	RNA biosynthetic process	Regulation of cellular biosynthetic process	Regulation of biosynthetic process	Nucleobase-containing compound biosynthetic process	Heterocycle biosynthetic process	Aromatic compound biosynthetic process
		Tumor	Regulation of transcription by RNA polymerase II	Transcription by RNA polymerase II	Regulation of cellular macromolecule biosynthetic process	Regulation of nucleic acid-templated transcription	Regulation of macromolecule biosynthetic process	Regulation of RNA metabolic process	RNA biosynthetic process	Regulation of cellular biosynthetic process	Regulation of nucleobase-containing compound metabolic process	Regulation of biosynthetic process
	CC	Normal	Transferase complex	Nuclear body	Nuclear protein-containing complex	Nuclear speck	Intracellular protein-containing complex	Nucleolus	Catalytic complex	Nucleoplasm	Nuclear lumen	Chromosome
		Tumor	Ubiquitin ligase complex	Microtubule organizing center	Centrosome	Transferase complex	Intracellular protein-containing complex	Microtubule cytoskeleton	Catalytic complex	Nucleoplasm	Nuclear lumen	Cytoskeleton
	MF	Normal	DNA binding	Sequence-specific DNA binding	Double-stranded DNA binding	Regulatory region nucleic acid binding	Sequence-specific double-stranded DNA binding	Transcription regulatory region sequence-specific DNA binding	Transcription regulator activity	Nucleic acid binding	Metal ion binding	Cation binding
		Tumor	RNA polymerase II transcription regulatory region sequence-specific DNA binding	Regulatory region nucleic acid binding	Transcription regulatory region sequence-specific DNA binding	Sequence-specific double-stranded DNA binding	Sequence-specific DNA binding	Double-stranded DNA binding	Transcription regulator activity	DNA binding	Nucleic acid binding	Metal ion binding
	KEGG	Normal	Nucleocytoplasmic transport	Herpes simplex virus 1 infection	Ribosome biogenesis in eukaryotes	RNA degradation	Inositol phosphate metabolism	Ubiquitin mediated proteolysis	Phosphatidylinositol signaling system	Spliceosome	Cell cycle	Protein processing in endoplasmic reticulum
		Tumor	Herpes simplex virus 1 infection	Propanoate metabolism	Ubiquitin mediated proteolysis	Lysine degradation	Inositol phosphate metabolism	Phosphatidylinositol signaling system	Autophagy	Protein processing in endoplasmic reticulum	Salmonella infection	Endocytosis
CHOL	BP	Normal	Mitochondrial translational elongation	Mitochondrial translational termination	Mitochondrial gene expression	DNA-dependent DNA replication	Proteasomal protein catabolic process	Mitochondrion organization	Regulation of catabolic process	Chromosome organization	Protein-containing complex subunit organization	Organelle organization
		Tumor	Regulation of transcription by RNA polymerase II	Transcription by RNA polymerase II	Regulation of nucleobase-containing compound metabolic process	Regulation of RNA biosynthetic process	Regulation of cellular macromolecule biosynthetic process	Regulation of transcription, DNA-templated	Regulation of macromolecule biosynthetic process	Regulation of RNA metabolic process	Regulation of cellular biosynthetic process	Regulation of biosynthetic process
	CC	Normal	Mitochondrial protein-containing complex	Mitochondrial inner membrane	Mitochondrial matrix	Organelle inner membrane	Mitochondrial membrane	Mitochondrial envelope	Mitochondrion	Catalytic complex	Organelle membrane	Nucleoplasm
		Tumor	Ubiquitin ligase complex	Transferase complex	Nuclear speck	Nuclear body	Intracellular protein-containing complex	Catalytic complex	Nuclear protein-containing complex	Nucleolus	Nucleoplasm	Nuclear lumen
	MF	Normal	Adenyl ribonucleotide binding	ATP binding	Adenyl nucleotide binding	Nucleotide binding	Nucleoside phosphate binding	Ribonucleotide binding	Purine ribonucleotide binding	Purine nucleotide binding	Anion binding	Small molecule binding
		Tumor	DNA binding	Transcription regulator activity	Sequence-specific DNA binding	Regulatory region nucleic acid binding	Transcription regulatory region sequence-specific DNA binding	Double-stranded DNA binding	Nucleic acid binding	Enzyme binding	Cation binding	Metal ion binding
	KEGG	Normal	DNA replication	Oxidative phosphorylation	Parkinson disease	Thermogenesis	Huntington disease	Prion disease	Amyotrophic lateral sclerosis	Alzheimer disease	Pathways of neurodegeneration	Metabolic pathways
		Tumor	Endometrial cancer	Non-small cell lung cancer	Renal cell carcinoma	Chronic myeloid leukemia	ErbB signaling pathway	Colorectal cancer	Autophagy	Hepatitis B	Hepatitis C	Herpes simplex virus 1 infection
COAD	BP	Normal	Regulation of transcription by RNA polymerase II	Transcription by RNA polymerase II	Regulation of cellular macromolecule biosynthetic process	Regulation of macromolecule biosynthetic process	Regulation of RNA metabolic process	Transcription, DNA-templated	Nucleic acid-templated transcription	RNA biosynthetic process	Regulation of cellular biosynthetic process	Regulation of biosynthetic process
		Tumor	Regulation of transcription by RNA polymerase II	Transcription by RNA polymerase II	Regulation of transcription, DNA-templated	Regulation of nucleic acid-templated transcription	Regulation of RNA metabolic process	Regulation of macromolecule biosynthetic process	Regulation of cellular macromolecule biosynthetic process	Regulation of nucleobase-containing compound metabolic process	Regulation of biosynthetic process	Regulation of cellular biosynthetic process
	CC	Normal	Nucleoplasm	Nuclear lumen
		Tumor	Ubiquitin ligase complex	Centrosome	Microtubule organizing center	Transferase complex	Axon	Microtubule cytoskeleton	Intracellular protein-containing complex	Nucleoplasm	Nuclear lumen	Cytoskeleton
	MF	Normal	RNA polymerase II transcription regulatory region sequence-specific DNA binding	DNA-binding transcription factor activity	Transcription regulatory region sequence-specific DNA binding	Regulatory region nucleic acid binding	Sequence-specific double-stranded DNA binding	Double-stranded DNA binding	Sequence-specific DNA binding	Transcription regulator activity	DNA binding	Nucleic acid binding
		Tumor	RNA polymerase II transcription regulatory region sequence-specific DNA binding	Regulatory region nucleic acid binding	Transcription regulatory region sequence-specific DNA binding	DNA-binding transcription factor activity	Sequence-specific double-stranded DNA binding	Sequence-specific DNA binding	Transcription regulator activity	DNA binding	Metal ion binding	Cation binding
	KEGG	Normal	Herpes simplex virus 1 infection
		Tumor	Herpes simplex virus 1 infection	Inositol phosphate metabolism	Phosphatidylinositol signaling system	Ubiquitin mediated proteolysis	TGF-beta signaling pathway
ESCA	BP	Normal	Chromosome segregation	DNA repair	DNA metabolic process	Mitotic cell cycle process	Chromosome organization	Small molecule metabolic process	Cell cycle	Organonitrogen compound biosynthetic process	Cellular response to stress	Organelle organization
		Tumor	Regulation of transcription by RNA polymerase II	Transcription by RNA polymerase II	Regulation of transcription, DNA-templated	Regulation of nucleic acid-templated transcription	Regulation of RNA biosynthetic process	Transcription, DNA-templated	Nucleic acid-templated transcription	RNA biosynthetic process	Regulation of RNA metabolic process	Regulation of macromolecule biosynthetic process
	CC	Normal	Mitochondrial matrix	Mitochondrion	Organelle subcompartment	Endoplasmic reticulum membrane	Endoplasmic reticulum subcompartment	Nuclear outer membrane-endoplasmic reticulum membrane network	Chromosome	Organelle membrane	Nucleoplasm	Nuclear lumen
		Tumor
	MF	Normal	Catalytic activity, acting on DNA	ATP binding	Adenyl nucleotide binding	Adenyl ribonucleotide binding	Nucleotide binding	Nucleoside phosphate binding	Transferase activity	Small molecule binding	Ribonucleotide binding	Nucleic acid binding
		Tumor	RNA polymerase II cis-regulatory region sequence-specific DNA binding	DNA-binding transcription factor activity, RNA polymerase II-specific	DNA-binding transcription factor activity	RNA polymerase II transcription regulatory region sequence-specific DNA binding	Transcription regulatory region sequence-specific DNA binding	Regulatory region nucleic acid binding	Sequence-specific double-stranded DNA binding	Sequence-specific DNA binding	Double-stranded DNA binding	Transcription regulator activity
	KEGG	Normal	Protein export	N-Glycan biosynthesis	Aminoacyl-tRNA biosynthesis	Fanconi anemia pathway	Biosynthesis of cofactors	Cell cycle	Protein processing in endoplasmic reticulum	Systemic lupus erythematosus	Alcoholism	Metabolic pathways
		Tumor	Herpes simplex virus 1 infection
GBM	BP	Normal	Cell division	Cell cycle process	Cell cycle	Transcription by RNA polymerase II	Organelle organization	Regulation of RNA metabolic process	Organic cyclic compound biosynthetic process	Aromatic compound biosynthetic process	Heterocycle biosynthetic process	Regulation of nucleobase-containing compound metabolic process
		Tumor	RNA processing	Organelle organization	Regulation of nucleobase-containing compound metabolic process	Regulation of cellular macromolecule biosynthetic process	Regulation of macromolecule biosynthetic process	Regulation of cellular biosynthetic process	Regulation of biosynthetic process	Nucleobase-containing compound biosynthetic process	Aromatic compound biosynthetic process	Heterocycle biosynthetic process
	CC	Normal	Myelin sheath	Endoplasmic reticulum membrane	Endoplasmic reticulum subcompartment	Nuclear outer membrane-endoplasmic reticulum membrane network	Organelle subcompartment	Microtubule cytoskeleton	Endoplasmic reticulum	Nuclear lumen	Nucleoplasm	Organelle membrane
		Tumor	Nuclear protein-containing complex	Transferase complex	Nuclear body	Intracellular protein-containing complex	Nucleolus	Catalytic complex	Nucleoplasm	Nuclear lumen	Microtubule cytoskeleton	Chromosome
	MF	Normal	Phosphatidylinositol binding	Cytoskeletal protein binding	Cis-regulatory region sequence-specific DNA binding	DNA binding	Sequence-specific DNA binding	Transcription regulator activity	Hydrolase activity	Metal ion binding	Cation binding	Nucleic acid binding
		Tumor	Transcription coregulator activity	RNA binding	Nucleic acid binding	DNA binding	Ribonucleotide binding	Enzyme binding	Transferase activity	Nucleotide binding	Nucleoside phosphate binding	Metal ion binding
	KEGG	Normal	DNA replication	Sphingolipid metabolism	Peroxisome	Cell cycle	Lysosome	Tight junction	MicroRNAs in cancer	Viral carcinogenesis	Herpes simplex virus 1 infection	Metabolic pathways
		Tumor	Aminoacyl-tRNA biosynthesis	Nucleocytoplasmic transport	Spliceosome	MRNA surveillance pathway	Ribosome biogenesis in eukaryotes	RNA degradation	Ubiquitin mediated proteolysis	AMPK signaling pathway	Autophagy	Endocytosis
HNSC	BP	Normal	Regulation of transcription by RNA polymerase II	Transcription by RNA polymerase II	Regulation of RNA biosynthetic process	Regulation of nucleic acid-templated transcription	Regulation of transcription, DNA-templated	RNA biosynthetic process	Regulation of cellular macromolecule biosynthetic process	Regulation of macromolecule biosynthetic process	Regulation of cellular biosynthetic process	Regulation of biosynthetic process
		Tumor	Cell cycle DNA replication	Meiotic nuclear division	Meiotic cell cycle	Double-strand break repair	DNA replication	DNA repair	Cellular response to DNA damage stimulus	DNA metabolic process	Cell cycle process	Cell cycle
	CC	Normal	Piccolo NuA4 histone acetyltransferase complex	Histone acetyltransferase complex	Transferase complex	Golgi membrane	Golgi apparatus subcompartment	Organelle subcompartment	Golgi apparatus	Nucleoplasm	Nuclear lumen	Organelle membrane
		Tumor	MCM complex	CMG complex	DNA replication preinitiation complex	Replisome	Nuclear replication fork	Replication fork	Site of DNA damage	Nuclear chromosome	Chromosome	Chromatin
	MF	Normal	RNA polymerase II transcription regulatory region sequence-specific DNA binding	DNA-binding transcription factor activity, RNA polymerase II-specific	DNA-binding transcription factor activity	Transcription regulatory region sequence-specific DNA binding	Regulatory region nucleic acid binding	Sequence-specific double-stranded DNA binding	Sequence-specific DNA binding	Double-stranded DNA binding	Transcription regulator activity	DNA binding
		Tumor	Single-stranded DNA binding	Catalytic activity, acting on DNA	DNA binding	Sequence-specific DNA binding	Sequence-specific double-stranded DNA binding	Double-stranded DNA binding	Regulatory region nucleic acid binding	DNA-binding transcription factor activity	Transcription regulatory region sequence-specific DNA binding	Transcription regulator activity
	KEGG	Normal	Herpes simplex virus 1 infection	Protein processing in endoplasmic reticulum	Lysosome
		Tumor	DNA replication	Mismatch repair	Base excision repair	Fanconi anemia pathway	Nucleotide excision repair	Cell cycle	P53 signaling pathway
KICH	BP	Normal
		Tumor	Regulation of nucleobase-containing compound metabolic process	Regulation of cellular macromolecule biosynthetic process	Regulation of RNA metabolic process	Regulation of macromolecule biosynthetic process	Regulation of cellular biosynthetic process	Regulation of biosynthetic process	Nucleobase-containing compound biosynthetic process	Heterocycle biosynthetic process	Aromatic compound biosynthetic process	Organic cyclic compound biosynthetic process
	CC	Normal	Mitochondrial intermembrane space	Nuclear outer membrane-endoplasmic reticulum membrane network	Endoplasmic reticulum membrane	Endoplasmic reticulum subcompartment	Organelle subcompartment	Organelle membrane	Bounding membrane of organelle
		Tumor	Transferase complex	Catalytic complex	Intracellular protein-containing complex	Nuclear body	Nuclear protein-containing complex	Nucleoplasm	Nuclear lumen	Organelle subcompartment	Bounding membrane of organelle	Organelle membrane
	MF	Normal
		Tumor	RNA polymerase II transcription regulatory region sequence-specific DNA binding	Regulatory region nucleic acid binding	Transcription regulatory region sequence-specific DNA binding	Sequence-specific DNA binding	Double-stranded DNA binding	Transcription regulator activity	DNA binding	Nucleic acid binding	Metal ion binding	Cation binding
	KEGG	Normal
		Tumor	MRNA surveillance pathway	Herpes simplex virus 1 infection	Ubiquitin mediated proteolysis	Mitophagy	Lysosome	Spinocerebellar ataxia	Protein processing in endoplasmic reticulum	Salmonella infection	Shigellosis	Metabolic pathways
KIRC	BP	Normal	Mitochondrion organization	RNA processing	Intracellular transport	Protein transport	Organonitrogen compound biosynthetic process	Establishment of protein localization	Peptide transport	Amide transport	Protein localization	Organelle organization
		Tumor	Intracellular transport	Organelle organization	Macromolecule modification	Cellular protein modification process	Protein modification process	Regulation of nucleobase-containing compound metabolic process	Regulation of cellular macromolecule biosynthetic process	Regulation of macromolecule biosynthetic process	Regulation of cellular biosynthetic process	Regulation of biosynthetic process
	CC	Normal	Mitochondrial inner membrane	Mitochondrial envelope	Mitochondrial membrane	Organelle envelope	Envelope	Catalytic complex	Mitochondrion	Organelle membrane	Nuclear lumen	Nucleoplasm
		Tumor	Transferase complex	Intracellular protein-containing complex	Nuclear protein-containing complex	Nuclear body	Catalytic complex	Microtubule organizing center	Nucleoplasm	Nucleolus	Nuclear lumen	Microtubule cytoskeleton
	MF	Normal	Aminoacyl-tRNA ligase activity	Catalytic activity, acting on a tRNA	Proton transmembrane transporter activity	Ligase activity	Catalytic activity, acting on RNA	RNA binding	Nucleic acid binding	Nucleoside phosphate binding	Nucleotide binding	Transferase activity
		Tumor	RNA binding	Enzyme binding	Transferase activity	Nucleic acid binding	DNA binding	Catalytic activity, acting on a protein	Purine ribonucleoside triphosphate binding	Purine nucleotide binding	Metal ion binding	Cation binding
	KEGG	Normal	Spliceosome	Oxidative phosphorylation	Thermogenesis	Parkinson disease	Huntington disease	Amyotrophic lateral sclerosis	Prion disease	Alzheimer disease	Pathways of neurodegeneration	Metabolic pathways
		Tumor	Adherens junction	Nucleocytoplasmic transport	Ubiquitin mediated proteolysis	ErbB signaling pathway	Autophagy	MRNA surveillance pathway	Sphingolipid signaling pathway	Protein processing in endoplasmic reticulum	Endocytosis	Herpes simplex virus 1 infection
KIRP	BP	Normal
		Tumor	Regulation of transcription by RNA polymerase II	Transcription by RNA polymerase II	Regulation of transcription, DNA-templated	Regulation of nucleic acid-templated transcription	Regulation of RNA biosynthetic process	Regulation of RNA metabolic process	RNA biosynthetic process	Transcription, DNA-templated	Nucleic acid-templated transcription	Regulation of nucleobase-containing compound metabolic process
	CC	Normal
		Tumor	Exon-exon junction complex	Spliceosomal complex	Centriole	Nuclear speck	Nuclear body	Nuclear protein-containing complex	Centrosome	Microtubule organizing center	Nucleoplasm	Nuclear lumen
	MF	Normal
		Tumor	RNA polymerase II transcription regulatory region sequence-specific DNA binding	DNA-binding transcription factor activity, RNA polymerase II-specific	DNA-binding transcription factor activity	Transcription regulatory region sequence-specific DNA binding	Regulatory region nucleic acid binding	Sequence-specific double-stranded DNA binding	Sequence-specific DNA binding	Double-stranded DNA binding	DNA binding	Nucleic acid binding
	KEGG	Normal
		Tumor	Herpes simplex virus 1 infection	Spliceosome	MRNA surveillance pathway
LIHC	BP	Normal	Organelle organization	Regulation of nucleobase-containing compound metabolic process	Regulation of macromolecule biosynthetic process	Regulation of cellular macromolecule biosynthetic process	Regulation of RNA metabolic process	Transcription, DNA-templated	Nucleic acid-templated transcription	RNA biosynthetic process	Regulation of cellular biosynthetic process	Regulation of biosynthetic process
		Tumor	Organelle organization	Macromolecule modification	Cellular protein modification process	Protein modification process	Regulation of nucleobase-containing compound metabolic process	Regulation of RNA metabolic process	Regulation of cellular macromolecule biosynthetic process	Regulation of macromolecule biosynthetic process	Regulation of cellular biosynthetic process	Regulation of biosynthetic process
	CC	Normal	Centrosome	Transferase complex	Microtubule organizing center	Nuclear body	Nuclear protein-containing complex	Microtubule cytoskeleton	Catalytic complex	Nucleoplasm	Nuclear lumen	Cytoskeleton
		Tumor	Transferase complex	Intracellular protein-containing complex	Nuclear protein-containing complex	Nuclear speck	Nuclear body	Catalytic complex	Nucleoplasm	Nuclear lumen	Nucleolus	Microtubule cytoskeleton
	MF	Normal	RNA binding	Transcription regulator activity	Nucleic acid binding	Purine ribonucleoside triphosphate binding	DNA binding	Enzyme binding	Purine nucleotide binding	Ribonucleotide binding	Metal ion binding	Cation binding
		Tumor	Transcription coregulator activity	RNA binding	Enzyme binding	Transferase activity	Nucleic acid binding	Purine ribonucleoside triphosphate binding	Catalytic activity, acting on a protein	DNA binding	Metal ion binding	Cation binding
	KEGG	Normal	Adherens junction	Herpes simplex virus 1 infection	Ubiquitin mediated proteolysis	Nucleocytoplasmic transport	Focal adhesion	Salmonella infection	Endocytosis	Shigellosis	Axon guidance	Human papillomavirus infection
		Tumor	Adherens junction	Ubiquitin mediated proteolysis	Nucleocytoplasmic transport	Autophagy	Spliceosome	Neurotrophin signaling pathway	Protein processing in endoplasmic reticulum	Endocytosis	Hepatitis B	Herpes simplex virus 1 infection
LUAD	BP	Normal	Anatomical structure morphogenesis	Nervous system development	Regulation of transcription by RNA polymerase II	Transcription by RNA polymerase II	Regulation of RNA metabolic process	Regulation of nucleobase-containing compound metabolic process	Regulation of cellular macromolecule biosynthetic process	Regulation of macromolecule biosynthetic process	Regulation of cellular biosynthetic process	Regulation of biosynthetic process
		Tumor	Regulation of transcription by RNA polymerase II	Regulation of RNA metabolic process	Regulation of nucleobase-containing compound metabolic process	Regulation of transcription, DNA-templated	Regulation of nucleic acid-templated transcription	Regulation of cellular macromolecule biosynthetic process	Regulation of RNA biosynthetic process	Regulation of macromolecule biosynthetic process	Regulation of cellular biosynthetic process	Regulation of biosynthetic process
	CC	Normal	Cell-cell junction	Nuclear body	Anchoring junction	Transferase complex	Nuclear protein-containing complex	Nucleoplasm	Nuclear lumen	Cell junction	Neuron projection	Chromosome
		Tumor	PML body	Cell leading edge	Centrosome	Microtubule organizing center	Nuclear body	Transferase complex	Microtubule cytoskeleton	Nucleoplasm	Cytoskeleton	Nuclear lumen
	MF	Normal	Transcription regulator activity	Enzyme binding	Sequence-specific DNA binding	Regulatory region nucleic acid binding	Sequence-specific double-stranded DNA binding	DNA binding	Metal ion binding	Transferase activity	Cation binding	Nucleic acid binding
		Tumor	Transcription regulator activity	Regulatory region nucleic acid binding	Transcription regulatory region sequence-specific DNA binding	Sequence-specific double-stranded DNA binding	DNA binding	Double-stranded DNA binding	Sequence-specific DNA binding	Nucleic acid binding	Metal ion binding	Cation binding
	KEGG	Normal	TGF-beta signaling pathway	Phosphatidylinositol signaling system	Focal adhesion	Axon guidance	Wnt signaling pathway	Signaling pathways regulating pluripotency of stem cells	Hippo signaling pathway	Proteoglycans in cancer	Pathways in cancer	Human papillomavirus infection
		Tumor	Circadian rhythm	Adherens junction	TGF-beta signaling pathway	Ubiquitin mediated proteolysis	Autophagy	Cellular senescence	FoxO signaling pathway	Herpes simplex virus 1 infection	Focal adhesion	MAPK signaling pathway
LUSC	BP	Normal	Regulation of transcription by RNA polymerase II	Transcription by RNA polymerase II	Regulation of transcription, DNA-templated	Regulation of nucleic acid-templated transcription	Regulation of RNA biosynthetic process	RNA biosynthetic process	Transcription, DNA-templated	Nucleic acid-templated transcription	Regulation of RNA metabolic process	Regulation of nucleobase-containing compound metabolic process
		Tumor	Mitotic spindle organization	Cell division	Organelle fission	Mitotic cell cycle process	Mitotic cell cycle	Cell cycle process	Cell cycle	Chromosome organization	Regulation of cell cycle	Organelle organization
	CC	Normal	Spindle microtubule	Centriole	Site of DNA damage	Centrosome	Microtubule organizing center	Nuclear body	Microtubule cytoskeleton	Chromosome	Nucleoplasm	Nuclear lumen
		Tumor	Condensed chromosome kinetochore	Condensed chromosome, centromeric region	Kinetochore	Condensed chromosome	Chromosome, centromeric region	Chromosomal region	Nuclear protein-containing complex	Chromosome	Nuclear lumen	Nucleoplasm
	MF	Normal	RNA polymerase II cis-regulatory region sequence-specific DNA binding	RNA polymerase II transcription regulatory region sequence-specific DNA binding	DNA-binding transcription factor activity, RNA polymerase II-specific	DNA-binding transcription factor activity	Regulatory region nucleic acid binding	Transcription regulatory region sequence-specific DNA binding	Sequence-specific double-stranded DNA binding	Double-stranded DNA binding	Sequence-specific DNA binding	DNA binding
		Tumor	Catalytic activity, acting on DNA	RNA binding	Nucleotide binding	Nucleoside phosphate binding	Purine ribonucleoside triphosphate binding	Purine nucleotide binding	Ribonucleotide binding	Purine ribonucleotide binding	Nucleic acid binding	Small molecule binding
	KEGG	Normal	Herpes simplex virus 1 infection	Fanconi anemia pathway
		Tumor	DNA replication	Cell cycle	Homologous recombination	Fanconi anemia pathway	Pyruvate metabolism	Nucleocytoplasmic transport	Ribosome biogenesis in eukaryotes	Oocyte meiosis	Carbon metabolism	Metabolic pathways
PAAD	BP	Normal
		Tumor	Cilium assembly	Cilium organization	Regulation of transcription by RNA polymerase II	Transcription by RNA polymerase II	Heterocycle biosynthetic process	Aromatic compound biosynthetic process	Nucleobase-containing compound biosynthetic process	RNA biosynthetic process	Organic cyclic compound biosynthetic process	Regulation of nucleobase-containing compound metabolic process
	CC	Normal
		Tumor	Elongator holoenzyme complex	Ciliary basal body	Cilium	Transferase complex	Microtubule organizing center	Intracellular protein-containing complex	Microtubule cytoskeleton	Mitochondrion	Catalytic complex	Nuclear lumen
	MF	Normal
		Tumor	RNA polymerase II transcription regulatory region sequence-specific DNA binding	Regulatory region nucleic acid binding	Transcription regulatory region sequence-specific DNA binding	Double-stranded DNA binding	Sequence-specific double-stranded DNA binding	Transcription regulator activity	DNA binding	Nucleic acid binding	Metal ion binding	Cation binding
	KEGG	Normal
		Tumor	Herpes simplex virus 1 infection
PRAD	BP	Normal	Nucleobase-containing compound biosynthetic process	RNA biosynthetic process	Aromatic compound biosynthetic process	Heterocycle biosynthetic process	Transcription, DNA-templated	Nucleic acid-templated transcription	Organic cyclic compound biosynthetic process	Regulation of nucleobase-containing compound metabolic process	Regulation of macromolecule biosynthetic process	Regulation of biosynthetic process
		Tumor	Regulation of nucleobase-containing compound metabolic process	Regulation of cellular macromolecule biosynthetic process	Regulation of macromolecule biosynthetic process	Regulation of RNA metabolic process	Regulation of biosynthetic process	Regulation of cellular biosynthetic process	Organelle organization	Nucleobase-containing compound biosynthetic process	Heterocycle biosynthetic process	Aromatic compound biosynthetic process
	CC	Normal	Membrane coat	Coated membrane	Transferase complex	Intracellular protein-containing complex	Nuclear body	Organelle subcompartment	Bounding membrane of organelle	Nucleoplasm	Nuclear lumen	Organelle membrane
		Tumor	Transferase complex	Intracellular protein-containing complex	Nuclear body	Nuclear protein-containing complex	Catalytic complex	Nucleolus	Nucleoplasm	Nuclear lumen	Microtubule cytoskeleton	Chromosome
	MF	Normal	RNA polymerase II transcription regulatory region sequence-specific DNA binding	Sequence-specific double-stranded DNA binding	Transcription regulatory region sequence-specific DNA binding	Regulatory region nucleic acid binding	DNA-binding transcription factor activity	Sequence-specific DNA binding	Double-stranded DNA binding	Nucleic acid binding	Metal ion binding	Cation binding
		Tumor	RNA binding	Sequence-specific DNA binding	Transcription regulator activity	Sequence-specific double-stranded DNA binding	Nucleic acid binding	Double-stranded DNA binding	DNA binding	Enzyme binding	Metal ion binding	Cation binding
	KEGG	Normal	Propanoate metabolism	Herpes simplex virus 1 infection	Nucleotide excision repair	Mitophagy	Autophagy	Protein processing in endoplasmic reticulum	Lysosome	Ubiquitin mediated proteolysis
		Tumor	Nucleocytoplasmic transport	Ribosome biogenesis in eukaryotes	Adherens junction	Ubiquitin mediated proteolysis	Herpes simplex virus 1 infection	MRNA surveillance pathway	Autophagy	Cellular senescence	Endocytosis	Shigellosis
READ	BP	Normal	Interleukin-18 production	Regulation of interleukin-18 production	Detection of bacterium	Detection of external biotic stimulus	Lipid catabolic process	Regulation of defense response	Inflammatory response	Regulation of response to external stimulus	Defense response	Response to external stimulus
		Tumor	Chromosome organization	Intracellular transport	Cell cycle	Organelle organization	Protein localization	Macromolecule localization	Macromolecule modification	Cellular protein modification process	Protein modification process	Cellular localization
	CC	Normal
		Tumor	Transferase complex	Nuclear protein-containing complex	Intracellular protein-containing complex	Nuclear body	Catalytic complex	Nucleolus	Nucleoplasm	Nuclear lumen	Microtubule cytoskeleton	Organelle membrane
	MF	Normal	Peptidoglycan immune receptor activity	Pattern recognition receptor activity	Lipopeptide binding	Peptidoglycan binding	Phospholipase activity	Lipase activity	Signaling receptor activity	Molecular transducer activity
		Tumor	RNA binding	Enzyme binding	Nucleoside phosphate binding	Nucleotide binding	Purine ribonucleoside triphosphate binding	Purine nucleotide binding	Ribonucleotide binding	Transferase activity	Nucleic acid binding	Small molecule binding
	KEGG	Normal
		Tumor	Nucleocytoplasmic transport	Spliceosome	Ubiquitin mediated proteolysis	Cell cycle	Protein processing in endoplasmic reticulum	Autophagy	Shigellosis	Endocytosis	Salmonella infection	Metabolic pathways
STAD	BP	Normal	Organelle organization	Regulation of nucleobase-containing compound metabolic process	Regulation of cellular macromolecule biosynthetic process	Regulation of macromolecule biosynthetic process	Regulation of RNA metabolic process	Regulation of cellular biosynthetic process	Nucleobase-containing compound biosynthetic process	Regulation of biosynthetic process	Heterocycle biosynthetic process	Aromatic compound biosynthetic process
		Tumor	NcRNA metabolic process	RNA processing	Intracellular transport	Cellular protein localization	Cellular macromolecule localization	Protein localization	Macromolecule localization	Organelle organization	Cellular localization	Macromolecule modification
	CC	Normal	Transferase complex	Intracellular protein-containing complex	Nuclear speck	Nuclear protein-containing complex	Nuclear body	Catalytic complex	Nucleolus	Nucleoplasm	Nuclear lumen	Microtubule cytoskeleton
		Tumor	Mitochondrial matrix	Transferase complex	Intracellular protein-containing complex	Catalytic complex	Ribonucleoprotein complex	Nuclear protein-containing complex	Nucleolus	Mitochondrion	Nucleoplasm	Nuclear lumen
	MF	Normal	RNA binding	Nucleic acid binding	DNA binding	Sequence-specific DNA binding	Transcription regulator activity	Double-stranded DNA binding	Enzyme binding	Transferase activity	Catalytic activity, acting on a protein	Metal ion binding
		Tumor	Catalytic activity, acting on RNA	RNA binding	Nucleoside phosphate binding	Nucleotide binding	Purine ribonucleoside triphosphate binding	Purine nucleotide binding	Purine ribonucleotide binding	Ribonucleotide binding	Small molecule binding	Nucleic acid binding
	KEGG	Normal	Nucleocytoplasmic transport	Nucleotide excision repair	Ubiquitin mediated proteolysis	Ribosome biogenesis in eukaryotes	MRNA surveillance pathway	RNA degradation	Autophagy	MTOR signaling pathway	Herpes simplex virus 1 infection	Human papillomavirus infection
		Tumor	Aminoacyl-tRNA biosynthesis	Nucleocytoplasmic transport	Ribosome biogenesis in eukaryotes	MRNA surveillance pathway	Ubiquitin mediated proteolysis	Spliceosome	Autophagy	Biosynthesis of cofactors	Protein processing in endoplasmic reticulum	Metabolic pathways
THCA	BP	Normal	Intracellular transport	Cellular protein localization	Cellular macromolecule localization	Establishment of protein localization	Protein localization	Macromolecule localization	Organelle organization	Macromolecule modification	Cellular protein modification process	Heterocycle biosynthetic process
		Tumor	Protein folding in endoplasmic reticulum	Thyroid hormone generation	Thyroid hormone metabolic process	Axoneme assembly	Microtubule bundle formation	Cilium movement	Cilium or flagellum-dependent cell motility	Microtubule-based movement	Cilium organization	Microtubule-based process
	CC	Normal	Transferase complex	Intracellular protein-containing complex	Catalytic complex	Nuclear protein-containing complex	Microtubule cytoskeleton	Organelle subcompartment	Nucleoplasm	Nuclear lumen	Bounding membrane of organelle	Organelle membrane
		Tumor	Axonemal dynein complex	Axoneme	Ciliary plasm	Plasma membrane bounded cell projection cytoplasm	Cytoplasmic region	Ciliary basal body	Cilium	Cell projection	Plasma membrane bounded cell projection	Cytoskeleton
	MF	Normal	Sequence-specific DNA binding	Transferase activity	RNA binding	Transcription regulator activity	Nucleoside phosphate binding	Nucleotide binding	Nucleic acid binding	DNA binding	Metal ion binding	Cation binding
		Tumor	Dynein light chain binding	Dynein heavy chain binding	3 ,5 -cyclic-AMP phosphodiesterase activity	Protein disulfide isomerase activity	Intramolecular oxidoreductase activity, transposing S-S bonds	3 ,5 -cyclic-nucleotide phosphodiesterase activity	Cyclic-nucleotide phosphodiesterase activity	Phosphoric diester hydrolase activity	Tubulin binding	Metal ion binding
	KEGG	Normal	Aminoacyl-tRNA biosynthesis	Propanoate metabolism	Lysine degradation	Nucleocytoplasmic transport	Ubiquitin mediated proteolysis	Herpes simplex virus 1 infection	Autophagy	Protein processing in endoplasmic reticulum	MTOR signaling pathway	Metabolic pathways
		Tumor	Thyroid hormone synthesis	Type II diabetes mellitus	Adipocytokine signaling pathway	Morphine addiction	Protein processing in endoplasmic reticulum	Insulin resistance	AGE-RAGE signaling pathway in diabetic complications	Autophagy	CAMP signaling pathway	Metabolic pathways
UCEC	BP	Normal	Ribosome biogenesis	Ribonucleoprotein complex biogenesis	NcRNA processing	NcRNA metabolic process	RNA processing	MRNA metabolic process	Cellular macromolecule catabolic process	Intracellular transport	Cellular macromolecule localization	Organelle organization
		Tumor	Mitotic cell cycle process	Mitotic cell cycle	Chromosome organization	Cell cycle process	Cell cycle	Cellular response to stress	Organelle organization	Macromolecule modification	Regulation of nucleobase-containing compound metabolic process	Heterocycle biosynthetic process
	CC	Normal	Ribonucleoprotein complex	Nuclear protein-containing complex	Transferase complex	Intracellular protein-containing complex	Catalytic complex	Nucleolus	Nucleoplasm	Nuclear lumen	Organelle envelope	Mitochondrion
		Tumor	Chromosomal region	Transferase complex	Intracellular protein-containing complex	Nuclear protein-containing complex	Nuclear body	Catalytic complex	Nucleolus	Nucleoplasm	Nuclear lumen	Mitochondrion
	MF	Normal	Structural constituent of ribosome	RNA binding	MRNA binding	Catalytic activity, acting on RNA	Transcription coregulator activity	Nucleic acid binding	DNA binding	Transferase activity	Transcription regulator activity	Enzyme binding
		Tumor	RNA binding	Enzyme binding	Nucleic acid binding	Transferase activity	Purine ribonucleoside triphosphate binding	Purine nucleotide binding	Nucleoside phosphate binding	Nucleotide binding	Purine ribonucleotide binding	Ribonucleotide binding
	KEGG	Normal	Ribosome	Spliceosome	Ribosome biogenesis in eukaryotes	Nucleocytoplasmic transport	Ubiquitin mediated proteolysis	Protein processing in endoplasmic reticulum	Herpes simplex virus 1 infection	Amyotrophic lateral sclerosis	Huntington disease	Alzheimer disease
		Tumor	Nucleocytoplasmic transport	Cell cycle	RNA degradation	Protein processing in endoplasmic reticulum	MRNA surveillance pathway	Ubiquitin mediated proteolysis	Spliceosome	Shigellosis	Salmonella infection	Metabolic pathways

## Sheet: Supplementary Table S6
TCGA Cancer Type	Gene Ontology & KEGG Pathways	Sample Type	Top 10 Enriched terms
BLCA	BP	Normal	Cilium organization	Cilium assembly	Regulation of transcription by RNA polymerase II	Transcription by RNA polymerase II	Organic cyclic compound biosynthetic process	Heterocycle biosynthetic process	Aromatic compound biosynthetic process	Nucleobase-containing compound biosynthetic process	Regulation of cellular biosynthetic process	Regulation of biosynthetic process
		Tumor	Regulation of transcription by RNA polymerase II	Transcription by RNA polymerase II	Regulation of transcription, DNA-templated	Regulation of nucleic acid-templated transcription	Regulation of RNA biosynthetic process	Transcription, DNA-templated	Nucleic acid-templated transcription	RNA biosynthetic process	Regulation of RNA metabolic process	Nucleobase-containing compound biosynthetic process
	CC	Normal
		Tumor	Cul4A-RING E3 ubiquitin ligase complex	Dynein axonemal particle	Axonemal dynein complex	Axoneme	Ciliary plasm	Plasma membrane bounded cell projection cytoplasm	Motile cilium	Cytoplasmic region	Regulation of RNA metabolic process	Nucleobase-containing compound biosynthetic process
	MF	Normal	RNA polymerase II transcription regulatory region sequence-specific DNA binding	DNA-binding transcription factor activity, RNA polymerase II-specific	DNA-binding transcription factor activity	RNA polymerase II cis-regulatory region sequence-specific DNA binding	Transcription regulatory region sequence-specific DNA binding	Regulatory region nucleic acid binding	Sequence-specific double-stranded DNA binding	Double-stranded DNA binding	Sequence-specific DNA binding	Transcription regulator activity
		Tumor	RNA polymerase II transcription regulatory region sequence-specific DNA binding	DNA-binding transcription factor activity	Transcription regulatory region sequence-specific DNA binding	DNA-binding transcription factor activity, RNA polymerase II-specific	Regulatory region nucleic acid binding	Sequence-specific double-stranded DNA binding	Sequence-specific DNA binding	Double-stranded DNA binding	Transcription regulator activity	DNA binding
	KEGG	Normal	Herpes simplex virus 1 infection
		Tumor	Herpes simplex virus 1 infection
BRCA	BP	Normal	Regulation of nucleobase-containing compound metabolic process	Regulation of RNA metabolic process	Regulation of cellular macromolecule biosynthetic process	Regulation of macromolecule biosynthetic process	RNA biosynthetic process	Regulation of cellular biosynthetic process	Regulation of biosynthetic process	Nucleobase-containing compound biosynthetic process	Heterocycle biosynthetic process	Aromatic compound biosynthetic process
		Tumor	RNA localization	RNA splicing, via transesterification reactions	RNA splicing, via transesterification reactions with bulged adenosine as nucleophile	RNA splicing	MRNA processing	RNA processing	MRNA metabolic process	Chromosome organization	Cell cycle	Organelle organization
	CC	Normal	Transferase complex	Nuclear body	Nuclear protein-containing complex	Nuclear speck	Intracellular protein-containing complex	Nucleolus	Catalytic complex	Nucleoplasm	Nuclear lumen	Chromosome
		Tumor	Ribonucleoprotein complex	Nuclear protein-containing complex	Intracellular protein-containing complex	Nucleolus	Nuclear body	Transferase complex	Catalytic complex	Nucleoplasm	Nuclear lumen	Chromosome
	MF	Normal	DNA binding	Sequence-specific DNA binding	Double-stranded DNA binding	Regulatory region nucleic acid binding	Sequence-specific double-stranded DNA binding	Transcription regulatory region sequence-specific DNA binding	Transcription regulator activity	Nucleic acid binding	Metal ion binding	Cation binding
		Tumor	MRNA binding	RNA binding	Catalytic activity, acting on RNA	Nucleic acid binding	Purine ribonucleoside triphosphate binding	Enzyme binding	Nucleoside phosphate binding	Nucleotide binding	Purine nucleotide binding	Purine ribonucleotide binding
	KEGG	Normal	Nucleocytoplasmic transport	Herpes simplex virus 1 infection	Ribosome biogenesis in eukaryotes	RNA degradation	Inositol phosphate metabolism	Ubiquitin mediated proteolysis	Phosphatidylinositol signaling system	Spliceosome	Cell cycle	Protein processing in endoplasmic reticulum
		Tumor	Protein export	Nucleocytoplasmic transport	Ribosome biogenesis in eukaryotes	Proteasome	MRNA surveillance pathway	Spliceosome	Spinocerebellar ataxia	Amyotrophic lateral sclerosis	Prion disease	Alzheimer disease
CHOL	BP	Normal
		Tumor
	CC	Normal	MKS complex	Ciliary transition zone
		Tumor
	MF	Normal
		Tumor
	KEGG	Normal
		Tumor
COAD	BP	Normal	Cilium or flagellum-dependent cell motility	Cilium-dependent cell motility	Cilium movement
		Tumor
	CC	Normal
		Tumor	Cilium
	MF	Normal
		Tumor
	KEGG	Normal	Neuroactive ligand-receptor interaction
		Tumor	Herpes simplex virus 1 infection
ESCA	BP	Normal	RNA splicing, via transesterification reactions with bulged adenosine as nucleophile	MRNA splicing, via spliceosome	RNA splicing, via transesterification reactions	RNA splicing	MRNA processing	RNA processing	Ribonucleoprotein complex biogenesis	MRNA metabolic process	Regulation of nucleobase-containing compound metabolic process	Heterocycle biosynthetic process
		Tumor
	CC	Normal	Spliceosomal complex	Ribonucleoprotein complex	Nuclear protein-containing complex	Transferase complex	Intracellular protein-containing complex	Nucleolus	Nuclear body	Catalytic complex	Nucleoplasm	Nuclear lumen
		Tumor	Inner dynein arm	Photoreceptor outer segment	Motile cilium	Cilium
	MF	Normal	SnRNA binding	Ubiquitin-like protein binding	RNA binding	Catalytic activity, acting on RNA	RNA polymerase II-specific DNA-binding transcription factor binding	MRNA binding	DNA-binding transcription factor binding	Nucleic acid binding	Enzyme binding	DNA binding
		Tumor	DNA-binding transcription factor activity, RNA polymerase II-specific	DNA-binding transcription factor activity	RNA polymerase II transcription regulatory region sequence-specific DNA binding	Transcription regulatory region sequence-specific DNA binding	Regulatory region nucleic acid binding	Sequence-specific double-stranded DNA binding	Transcription regulator activity	Sequence-specific DNA binding	Double-stranded DNA binding
	KEGG	Normal	Spliceosome	RNA polymerase	Ribosome biogenesis in eukaryotes	Basal transcription factors	Proteasome	Nucleocytoplasmic transport	MRNA surveillance pathway	IL-17 signaling pathway	Necroptosis	Amyotrophic lateral sclerosis
		Tumor	Herpes simplex virus 1 infection
GBM	BP	Normal
		Tumor	Sensory perception of taste
	CC	Normal
		Tumor
	MF	Normal
		Tumor	Taste receptor activity
	KEGG	Normal
		Tumor	Taste transduction
HNSC	BP	Normal	Macromolecule modification	Protein modification process	Cellular protein modification process	Cellular protein metabolic process	RNA metabolic process	Cellular component organization	Cellular component organization or biogenesis	Protein metabolic process	Gene expression	Organonitrogen compound metabolic process
		Tumor	Cell cycle DNA replication	Meiotic nuclear division	Meiotic cell cycle	Double-strand break repair	DNA replication	DNA repair	DNA metabolic process	Cellular response to DNA damage stimulus	Cell cycle process	Cell cycle
	CC	Normal	Nucleoplasm	Nuclear lumen	Membrane-enclosed lumen	Organelle lumen	Intracellular organelle lumen	Endomembrane system	Nucleus	Intracellular membrane-bounded organelle	Protein-containing complex	Cytoplasm
		Tumor	MCM complex	CMG complex	DNA replication preinitiation complex	Replisome	Nuclear replication fork	Replication fork	Site of DNA damage	Nuclear chromosome	Chromosome	Chromatin
	MF	Normal	RNA binding	ATP binding	Purine ribonucleoside triphosphate binding	Catalytic activity, acting on a protein	Carbohydrate derivative binding	Nucleotide binding	Nucleoside phosphate binding	Anion binding	Transferase activity	Ion binding
		Tumor	Single-stranded DNA binding	Catalytic activity, acting on DNA	DNA binding	Sequence-specific DNA binding	Sequence-specific double-stranded DNA binding	Double-stranded DNA binding	Regulatory region nucleic acid binding	DNA-binding transcription factor activity	Transcription regulatory region sequence-specific DNA binding	Transcription regulator activity
	KEGG	Normal	Fanconi anemia pathway	Basal transcription factors	Lysine degradation	RNA transport	Mitophagy	MRNA surveillance pathway	Ubiquitin mediated proteolysis	Spliceosome	Autophagy	Endocytosis
		Tumor	DNA replication	Mismatch repair	Base excision repair	Fanconi anemia pathway	Nucleotide excision repair	Cell cycle	P53 signaling pathway
KICH	BP	Normal
		Tumor	Positive regulation of nuclear-transcribed mRNA poly(A) tail shortening	Regulation of nuclear-transcribed mRNA poly(A) tail shortening	Positive regulation of nuclear-transcribed mRNA catabolic process, deadenylation-dependent decay	Regulation of nuclear-transcribed mRNA catabolic process, deadenylation-dependent decay	Positive regulation of mRNA catabolic process	NcRNA processing	NcRNA metabolic process	RNA processing
	CC	Normal
		Tumor	Centriolar satellite	Centrosome	Nucleolus	Nuclear lumen	Membrane-enclosed lumen	Organelle lumen	Intracellular organelle lumen	Non-membrane-bounded organelle	Intracellular non-membrane-bounded organelle	Nucleus
	MF	Normal
		Tumor	RNA binding
	KEGG	Normal
		Tumor
KIRC	BP	Normal	NcRNA processing	NcRNA metabolic process	RNA processing	Protein localization	Macromolecule modification	Cellular protein metabolic process	Protein modification process	Cellular component organization or biogenesis	Protein metabolic process	Organonitrogen compound metabolic process
		Tumor	Regulation of transcription by RNA polymerase II	Transcription by RNA polymerase II	Regulation of RNA metabolic process	Regulation of transcription, DNA-templated	Regulation of nucleic acid-templated transcription	Regulation of RNA biosynthetic process	Regulation of cellular macromolecule biosynthetic process	Regulation of macromolecule biosynthetic process	Regulation of nucleobase-containing compound metabolic process	Regulation of cellular biosynthetic process
	CC	Normal	Nuclear lumen	Membrane-enclosed lumen	Organelle lumen	Intracellular organelle lumen	Catalytic complex	Organelle membrane	Intracellular membrane-bounded organelle	Protein-containing complex	Cytoplasm	Nucleus
		Tumor	Centriole	Motile cilium	Spliceosomal complex	Nuclear speck	Cilium	Nuclear body	Nuclear protein-containing complex	Nucleoplasm	Nuclear lumen
	MF	Normal	RNA methyltransferase activity	Proton transmembrane transporter activity	Catalytic activity, acting on a tRNA	S-adenosylmethionine-dependent methyltransferase activity	Catalytic activity, acting on RNA	RNA binding	Transferase activity	Catalytic activity, acting on a protein	Hydrolase activity	Ion binding
		Tumor	DNA-binding transcription factor activity, RNA polymerase II-specific	RNA polymerase II transcription regulatory region sequence-specific DNA binding	DNA-binding transcription factor activity	Transcription regulatory region sequence-specific DNA binding	Regulatory region nucleic acid binding	Sequence-specific double-stranded DNA binding	Sequence-specific DNA binding	Transcription regulator activity	DNA binding	Nucleic acid binding
	KEGG	Normal	Proteasome	N-Glycan biosynthesis	Spliceosome	Ribosome biogenesis in eukaryotes	Oxidative phosphorylation	Protein processing in endoplasmic reticulum	RNA transport	Ubiquitin mediated proteolysis	KEGG xtropicalis ens path:xtr05208	Metabolic pathways
		Tumor	Herpes simplex virus 1 infection
KIRP	BP	Normal
		Tumor	MRNA splice site selection
	CC	Normal
		Tumor	Motile cilium	Cilium
	MF	Normal
		Tumor	Bitter taste receptor activity	Pre-mRNA binding	Endodeoxyribonuclease activity	Deoxyribonuclease activity	RNA polymerase II cis-regulatory region sequence-specific DNA binding	Cis-regulatory region sequence-specific DNA binding	RNA polymerase II transcription regulatory region sequence-specific DNA binding	DNA-binding transcription factor activity, RNA polymerase II-specific	DNA-binding transcription factor activity	Double-stranded DNA binding
	KEGG	Normal
		Tumor	Taste transduction	Herpes simplex virus 1 infection
LIHC	BP	Normal	Regulation of myotube differentiation	Nuclear-transcribed mRNA catabolic process	Ribosome biogenesis	Ribonucleoprotein complex biogenesis	MRNA metabolic process	RNA processing	Gene expression	Cellular component organization or biogenesis	Regulation of macromolecule metabolic process	Regulation of metabolic process
		Tumor	Cytoskeleton organization	Positive regulation of molecular function	Regulation of catalytic activity	Regulation of molecular function	Phosphate-containing compound metabolic process	Phosphorus metabolic process	Localization	Protein modification process	Organonitrogen compound metabolic process	Protein metabolic process
	CC	Normal	Nucleolus	Ribonucleoprotein complex	Endosome	Nuclear lumen	Membrane-enclosed lumen	Organelle lumen	Intracellular organelle lumen	Nucleus	Intracellular membrane-bounded organelle	Cytoplasm
		Tumor	Cytoplasm	Integral component of membrane	Intrinsic component of membrane
	MF	Normal	Protein transmembrane transporter activity	Protein transporter activity	Translation initiation factor activity	Translation factor activity, RNA binding	Translation regulator activity, nucleic acid binding	Translation regulator activity	RNA binding	Enzyme binding	Hydrolase activity
		Tumor	Cytoskeletal protein binding	Calcium ion binding	Catalytic activity, acting on a protein	Protein binding
	KEGG	Normal	Spliceosome	RNA transport
		Tumor
LUAD	BP	Normal	Regulation of transcription by RNA polymerase II	Transcription by RNA polymerase II	Regulation of RNA metabolic process	Regulation of transcription, DNA-templated	Regulation of nucleic acid-templated transcription	Regulation of RNA biosynthetic process	Regulation of nucleobase-containing compound metabolic process	Transcription, DNA-templated	Nucleic acid-templated transcription	RNA biosynthetic process
		Tumor	Organelle organization	Protein modification process	Cellular protein modification process	Macromolecule modification	Regulation of nitrogen compound metabolic process	Regulation of cellular metabolic process	Regulation of primary metabolic process	Regulation of macromolecule metabolic process	Regulation of metabolic process	Cellular component organization
	CC	Normal	Spliceosomal complex	Nuclear speck
		Tumor	Nucleoplasm	Transferase complex	Nuclear lumen	Cell projection	Vesicle	Cytoskeleton	Nucleus	Membrane-enclosed lumen	Cytoplasm	Intracellular membrane-bounded organelle
	MF	Normal	DNA-binding transcription factor activity, RNA polymerase II-specific	RNA polymerase II transcription regulatory region sequence-specific DNA binding	DNA-binding transcription factor activity	Transcription regulatory region sequence-specific DNA binding	Regulatory region nucleic acid binding	Sequence-specific double-stranded DNA binding	Sequence-specific DNA binding	Double-stranded DNA binding	Transcription regulator activity	DNA binding
		Tumor	Nucleosome-dependent ATPase activity	Ubiquitin-like protein transferase activity	Protein serine/threonine kinase activity	Enzyme binding	Catalytic activity, acting on a protein	Adenyl ribonucleotide binding	ATP binding	Adenyl nucleotide binding	Molecular function regulator	Protein binding
	KEGG	Normal	Herpes simplex virus 1 infection	MRNA surveillance pathway
		Tumor
LUSC	BP	Normal	Regulation of transcription by RNA polymerase II	Transcription by RNA polymerase II	Regulation of RNA metabolic process	Regulation of transcription, DNA-templated	Regulation of nucleic acid-templated transcription	Regulation of RNA biosynthetic process	RNA biosynthetic process	Regulation of nucleobase-containing compound metabolic process	Regulation of cellular macromolecule biosynthetic process	Regulation of macromolecule biosynthetic process
		Tumor	Detection of chemical stimulus involved in sensory perception of bitter taste	Sensory perception of bitter taste	Detection of chemical stimulus involved in sensory perception of taste	RNA splicing	RNA splicing, via transesterification reactions with bulged adenosine as nucleophile	MRNA splicing, via spliceosome	RNA splicing, via transesterification reactions	MRNA processing
	CC	Normal	Spliceosomal complex	Nuclear body	Nuclear lumen	Nucleoplasm
		Tumor	U2-type prespliceosome	Prespliceosome	U1 snRNP	Golgi cis cisterna	Spliceosomal complex	Nuclear speck	Cilium
	MF	Normal	RNA polymerase II transcription regulatory region sequence-specific DNA binding	DNA-binding transcription factor activity	DNA-binding transcription factor activity, RNA polymerase II-specific	Transcription regulatory region sequence-specific DNA binding	Regulatory region nucleic acid binding	Sequence-specific double-stranded DNA binding	Double-stranded DNA binding	Transcription regulator activity	DNA binding	Nucleic acid binding
		Tumor	SAM domain binding	Crossover junction endodeoxyribonuclease activity	5 -flap endonuclease activity	Flap endonuclease activity	Bitter taste receptor activity	Taste receptor activity	Endodeoxyribonuclease activity	Deoxyribonuclease activity
	KEGG	Normal	Herpes simplex virus 1 infection
		Tumor	Taste transduction	Spliceosome
PAAD	BP	Normal
		Tumor
	CC	Normal
		Tumor
	MF	Normal
		Tumor
	KEGG	Normal
		Tumor
PRAD	BP	Normal	Regulation of natural killer cell chemotaxis	Natural killer cell chemotaxis	Detection of chemical stimulus involved in sensory perception of taste	Detection of chemical stimulus involved in sensory perception of bitter taste	Sensory perception of taste	Leukocyte differentiation	Inflammatory response	Negative regulation of transcription by RNA polymerase II	G protein-coupled receptor signaling pathway	Negative regulation of nitrogen compound metabolic process
		Tumor	Regulation of transcription by RNA polymerase II	Transcription by RNA polymerase II	Regulation of RNA metabolic process	Regulation of transcription, DNA-templated	Regulation of nucleic acid-templated transcription	Regulation of RNA biosynthetic process	Regulation of nucleobase-containing compound metabolic process	Transcription, DNA-templated	Regulation of cellular macromolecule biosynthetic process	Regulation of macromolecule biosynthetic process
	CC	Normal
		Tumor	Semaphorin receptor complex	Ciliary transition zone	Spliceosomal complex	Ciliary basal body	Nuclear speck	Nuclear body	Cilium	Nuclear protein-containing complex	Nucleoplasm	Nuclear lumen
	MF	Normal	Hormone activity	Cytokine activity	Signaling receptor activator activity	Receptor ligand activity	Receptor regulator activity	Cytokine receptor binding	DNA-binding transcription repressor activity, RNA polymerase II-specific	DNA-binding transcription repressor activity	DNA-binding transcription activator activity, RNA polymerase II-specific	DNA-binding transcription activator activity
		Tumor	DNA-binding transcription factor activity	RNA polymerase II transcription regulatory region sequence-specific DNA binding	DNA-binding transcription factor activity, RNA polymerase II-specific	Transcription regulatory region sequence-specific DNA binding	Regulatory region nucleic acid binding	Sequence-specific DNA binding	Double-stranded DNA binding	Transcription regulator activity	DNA binding	Nucleic acid binding
	KEGG	Normal	Taste transduction	IL-17 signaling pathway	Viral protein interaction with cytokine and cytokine receptor	C-type lectin receptor signaling pathway	TNF signaling pathway	Cytokine-cytokine receptor interaction	Transcriptional misregulation in cancer	Neuroactive ligand-receptor interaction
		Tumor	Herpes simplex virus 1 infection	Spliceosome
READ	BP	Normal
		Tumor	Regulation of transcription by RNA polymerase II	Transcription by RNA polymerase II	Regulation of RNA metabolic process	Regulation of transcription, DNA-templated	Regulation of nucleic acid-templated transcription	Regulation of RNA biosynthetic process	Regulation of nucleobase-containing compound metabolic process	Transcription, DNA-templated	Nucleic acid-templated transcription	RNA biosynthetic process
	CC	Normal	Inner dynein arm
		Tumor	Cilium
	MF	Normal
		Tumor	RNA polymerase II transcription regulatory region sequence-specific DNA binding	DNA-binding transcription factor activity	DNA-binding transcription factor activity, RNA polymerase II-specific	Transcription regulatory region sequence-specific DNA binding	Regulatory region nucleic acid binding	RNA polymerase II cis-regulatory region sequence-specific DNA binding	Sequence-specific double-stranded DNA binding	Double-stranded DNA binding	Sequence-specific DNA binding	Transcription regulator activity
	KEGG	Normal
		Tumor	Herpes simplex virus 1 infection
STAD	BP	Normal	Cellular macromolecule catabolic process	Protein modification by small protein conjugation or removal	Macromolecule catabolic process	Macromolecule modification	Protein modification process	Cellular protein modification process	Cellular protein metabolic process	Cellular component organization or biogenesis	Protein metabolic process	Organonitrogen compound metabolic process
		Tumor	NcRNA processing	NcRNA metabolic process	RNA processing	MRNA metabolic process	Establishment of protein localization	Cellular component biogenesis	Macromolecule modification	Cellular protein metabolic process	Organonitrogen compound metabolic process	Cellular nitrogen compound metabolic process
	CC	Normal	Nucleoplasm	Nuclear lumen	Membrane-enclosed lumen	Organelle lumen	Intracellular organelle lumen	Catalytic complex	Nucleus	Intracellular membrane-bounded organelle	Protein-containing complex	Cytoplasm
		Tumor	Nuclear lumen	Membrane-enclosed lumen	Organelle lumen	Intracellular organelle lumen	Organelle membrane	Endomembrane system	Intracellular membrane-bounded organelle	Cytoplasm	Nucleus	Protein-containing complex
	MF	Normal	Ubiquitin-like protein transferase activity	Ubiquitin-protein transferase activity	Ubiquitin-like protein ligase activity	Ubiquitin protein ligase activity	RNA binding	Transferase activity	ATP binding	Catalytic activity, acting on a protein	Purine ribonucleoside triphosphate binding	Protein binding
		Tumor	Translation initiation factor activity	RNA binding	Purine ribonucleoside triphosphate binding	Nucleotide binding	Nucleoside phosphate binding	Purine ribonucleotide binding	Purine nucleotide binding	Small molecule binding	Anion binding	Transferase activity
	KEGG	Normal	Fanconi anemia pathway	RNA transport	Mitophagy	Ribosome biogenesis in eukaryotes	Ubiquitin mediated proteolysis	ErbB signaling pathway	GnRH signaling pathway	Autophagy
		Tumor	Autophagy	Porphyrin and chlorophyll metabolism	RNA transport	Valine, leucine and isoleucine degradation	MRNA surveillance pathway	Biosynthesis of cofactors	Ubiquitin mediated proteolysis	Autophagy	Spliceosome	Metabolic pathways
THCA	BP	Normal	Protein localization	Cellular localization	Macromolecule modification	Protein modification process	Cellular protein modification process	Cellular protein metabolic process	Cellular component organization or biogenesis	Cellular component organization	Protein metabolic process	Organonitrogen compound metabolic process
		Tumor	Regulation of transcription by RNA polymerase II	Transcription by RNA polymerase II	Regulation of transcription, DNA-templated	Regulation of nucleic acid-templated transcription	Regulation of RNA biosynthetic process	Regulation of RNA metabolic process	RNA biosynthetic process	Regulation of cellular macromolecule biosynthetic process	Regulation of macromolecule biosynthetic process	Regulation of nucleobase-containing compound metabolic process
	CC	Normal	Endoplasmic reticulum membrane	Nuclear outer membrane-endoplasmic reticulum membrane network	Membrane-enclosed lumen	Organelle lumen	Intracellular organelle lumen	Endomembrane system	Organelle membrane	Intracellular membrane-bounded organelle	Cytoplasm	Nucleus
		Tumor	Spliceosomal complex	Nuclear speck	Nuclear body	Cilium	Centrosome	Microtubule organizing center	Nuclear protein-containing complex	Microtubule cytoskeleton	Nucleoplasm	Nuclear lumen
	MF	Normal	Anion binding	Nucleotide binding	Nucleoside phosphate binding	Small molecule binding	Transferase activity	Purine ribonucleoside triphosphate binding	Purine nucleotide binding	Ribonucleotide binding	Catalytic activity, acting on a protein	Ion binding
		Tumor	RNA polymerase II transcription regulatory region sequence-specific DNA binding	DNA-binding transcription factor activity	Transcription regulatory region sequence-specific DNA binding	Regulatory region nucleic acid binding	Sequence-specific double-stranded DNA binding	Sequence-specific DNA binding	Double-stranded DNA binding	Transcription regulator activity	DNA binding	Nucleic acid binding
	KEGG	Normal	Lysine degradation	Valine, leucine and isoleucine degradation	RNA transport	Mitophagy	ErbB signaling pathway	Ubiquitin mediated proteolysis	Autophagy	Peroxisome	Protein processing in endoplasmic reticulum	Metabolic pathways
		Tumor	Herpes simplex virus 1 infection	Spliceosome
UCEC	BP	Normal	Cristae formation	Inner mitochondrial membrane organization	Mitochondrial transmembrane transport	Mitochondrial membrane organization	Oxidative phosphorylation	Mitochondrial transport	Mitochondrion organization	Ossification	Extracellular matrix organization	Extracellular structure organization
		Tumor	Cellular localization	Organelle organization	Macromolecule modification	Cellular protein metabolic process	Protein modification process	Cellular protein modification process	Cellular component organization or biogenesis	Cellular component organization	Protein metabolic process	Organonitrogen compound metabolic process
	CC	Normal	Inner mitochondrial membrane protein complex	Endoplasmic reticulum lumen	Mitochondrial protein-containing complex	Mitochondrial inner membrane	Organelle inner membrane	Mitochondrial membrane	Mitochondrial envelope	Mitochondrion	Organelle envelope	Envelope
		Tumor	Nucleoplasm	Nuclear lumen	Membrane-enclosed lumen	Organelle lumen	Intracellular organelle lumen	Endomembrane system	Nucleus	Intracellular membrane-bounded organelle	Cytoplasm	Protein-containing complex
	MF	Normal	Metallopeptidase activity	Ion transmembrane transporter activity
		Tumor	Adenyl ribonucleotide binding	Adenyl nucleotide binding	Purine ribonucleoside triphosphate binding	Purine nucleotide binding	Purine ribonucleotide binding	Nucleotide binding	Nucleoside phosphate binding	Small molecule binding	Anion binding	Ion binding
	KEGG	Normal	Glutathione metabolism	Oxidative phosphorylation	Thermogenesis	Parkinson disease	Diabetic cardiomyopathy	Huntington disease	Alzheimer disease	Metabolic pathways
		Tumor	Fanconi anemia pathway	Basal transcription factors	Mitophagy	RNA transport	Lysine degradation	MRNA surveillance pathway	Autophagy	Ubiquitin mediated proteolysis	Protein processing in endoplasmic reticulum	Metabolic pathways

## Sheet: Supplementary Table S7
	THAP9		THAP9-AS1
TCGA cancer ids	Normal	Tumor	Normal	Tumor
BLCA	darkturquoise	tan	brown	green
BRCA	turquoise	turquoise	turquoise	yellow
CHOL	turquoise	yellow	darkgrey	grey
COAD	royalblue	yellow	red	green
ESCA	blue	lightgreen	green	yellow
GBM	blue	turquoise	pink	blue
HNSC	brown	yellow	turquoise	yellow
KICH	magenta	blue	darkslateblue	skyblue1
KIRC	turquoise	turquoise	turquoise	yellow
KIRP		yellow		brown
LIHC	turquoise	turquoise	green	blue
LUAD	turquoise	brown	yellow	brown
LUSC	black	yellow	tan	brown
PAAD		blue		grey
PRAD	brown	turquoise	red	black
READ	red	turquoise	lightcyan1	yellow
STAD	blue	blue	blue	blue
THCA	turquoise	green	turquoise	brown
UCEC	turquoise	turquoise	brown	turquoise
